# Supplementary material for: Synthesis of 3-substituted 2,3-dihydropyrazino[1,2-a]indol-4(1H)-ones by sequential reactions of 2-indolylmethyl acetates with α-amino acids
Source: PubMed Central journal article supplement — RSC Adv. 2023 Mar 29;13(15):10090–6. doi: 10.1039/d3ra01335a (PMC10053697; doi:10.1039/d3ra01335a), 2023-03-29

## ESI

### Synthesis of 3-substituted 2,3-dihydropyrazino[1,2-*a*]indol-4(1*H*)-ones by sequential reactions of 2-indolylmethyl acetates with $\alpha$ -amino acids

Antonella Goggiamani,<sup>\*a</sup> Antonio Arcadi,<sup>b</sup> Alessia Ciogli,<sup>a</sup> Martina De Angelis,<sup>a</sup> Stefano Dessalvi,<sup>a</sup> Giancarlo Fabrizi,<sup>a</sup> Federica Iavarone,<sup>c,d</sup> Antonia Iazzetti,<sup>c,d</sup> Alessio Sferrazza,<sup>a,e\*</sup> and Roberta Zoppoli<sup>a</sup>

<sup>a</sup> *Dipartimento di Chimica e Tecnologie del Farmaco, Sapienza, Università di Roma, P.le A. Moro 5, 00185 Rome, Italy.*

<sup>b</sup> *Dipartimento di Scienze Fisiche e Chimiche, Università degli Studi di L'Aquila; Via Vetoio, 67100 Coppito (AQ), Italy.*

<sup>c</sup> *Dipartimento di Scienze Biotechologiche di base, Cliniche Intensivologiche e Perioperatorie, Università Cattolica del Sacro Cuore, L.go Francesco Vito 1, 00168 Rome, Italy.*

<sup>d</sup> *Policlinico Universitario 'A. Gemelli' Foundation-IRCCS, Rome, 00168, Italy*

<sup>e</sup> *Alessio Sferrazza is currently a research scientist in IRBM S.p.A., Medicinal Chemistry Department, Pomezia, Roma, Italy.*

[antonella.goggiamani@uniroma1.it](mailto:antonella.goggiamani@uniroma1.it); [a.sferrazza@irbm.com](mailto:a.sferrazza@irbm.com);

|                                                                                                                                     |    |
|-------------------------------------------------------------------------------------------------------------------------------------|----|
| <b>1. GENERAL INFORMATION</b> .....                                                                                                 | 2  |
| <b>2. SYNTHETIC PROCEDURES FOR STARTING MATERIALS</b> .....                                                                         | 2  |
| 2.1. Typical procedure for the preparation of substituted (1 <i>H</i> -indol-2-yl)methyl acetate <b>1(a-e)</b> .....                | 2  |
| 2.1.a Typical procedure for the preparation of (1 <i>H</i> -indol-2-yl)methyl acetate <b>1</b> .....                                | 2  |
| 2.1.b Typical procedure for the preparation of (3-phenyl-1 <i>H</i> -phenyl-2-yl)methyl acetate ( <b>1e</b> ) .....                 | 3  |
| 2.2. Typical procedure for the preparation of methyl <i>N</i> -benzil L-phenylalaninate <b>9</b> .....                              | 5  |
| <b>3. SYNTHETIC PROCEDURES FOR FINAL COMPOUNDS</b> .....                                                                            | 5  |
| 3.1. Typical procedure for the preparation of 3-benzyl-2,3-dihydropyrazino[1,2- <i>a</i> ]indol-4(1 <i>H</i> )-one <b>5</b> : ..... | 5  |
| 3.2. Typical procedure for the preparation of 2,3-dibenzyl-2,3-dihydropyrazino[1,2- <i>a</i> ]indol-4(1 <i>H</i> )-one <b>10</b>    | 6  |
| <b>4. CHARACTERIZATION DATA OF STARTING MATERIALS</b> .....                                                                         | 7  |
| 4.1. Characterization data of (1 <i>H</i> -indol-2-yl)methanols <b>7</b> .....                                                      | 7  |
| 4.2. Characterization data of 1 (1 <i>H</i> -indol-2-yl)methyl acetates <b>1</b> .....                                              | 7  |
| 4.3. Characterization data of <i>N</i> -benzil $\alpha$ -amino acids alkyl esters <b>9</b> .....                                    | 8  |
| <b>5. CHARACTERIZATION DATA OF FINAL PRODUCTS</b> .....                                                                             | 9  |
| 5.1. Characterization data of 3-substituted-2,3-dihydropyrazino[1,2- <i>a</i> ]indol-4(1 <i>H</i> )-ones <b>5, 8, 11-13</b> .....   | 9  |
| 5.2. Characterization data of 2-benzyl-3-substituted 2,3-dihydropyrazino[1,2- <i>a</i> ]indol-4(1 <i>H</i> )-ones <b>10</b> .....   | 15 |
| <b>6. HPLC DATA AND CHROMATOGRAMS: EFFECT OF REACTION TEMPERATURE IN ENANTIOMERIC EXCESS</b><br>.....                               | 16 |
| <b>7. REFERENCES</b> .....                                                                                                          | 20 |
| <b>8. COPIES OF NMR SPECTRA</b> .....                                                                                               | 21 |

## 1. GENERAL INFORMATION

All of the commercially available reagents, catalysts, bases and solvents were used as purchased, without further purification. Starting materials **1**, **7** and reaction products **5**, **8**, **10-13** were purified, when needed, by flash chromatography using SiO<sub>2</sub> as stationary phase, eluting with *n*-hexane/ethyl acetate (EtOAc) mixtures.  $\alpha$ -amino acid methyl esters **4a-d** were obtained by corresponding commercially available chloro hydrates. <sup>1</sup>H NMR (400.13 MHz), <sup>13</sup>C NMR (100.6 MHz), and <sup>19</sup>F spectra (376.5 MHz) were recorded with a Bruker Avance 400 spectrometer. Splitting patterns are designed as s (singlet), d (doublet), t (triplet), dt (doublets of triplets), td (triplet of doublets), triplets of triplets (tt), q (quartet), m (multiplet), or br s (broad singlet). IR spectra were recorded with a Jasco FT/IR 6800 (ATR). HRMS of samples were recorded on Orbitrap Exactive (Thermo Fisher) (compounds **1** and **7**, **11**, **8a**, **8g**, **12**, **13**) and Orbitrap Fusion Lumos (Thermo Fisher) (compounds **5**, **8**, **10**) and Orbitrap Exactive (Thermo Fisher). Source ESI positive as well negative. Data were collected on Xcalibur (Thermo Scientific, Bremen, Germany). Melting points were determined with a Büchi B-545 apparatus and are uncorrected.

## 2. SYNTHETIC PROCEDURES FOR STARTING MATERIALS

### 2.1. Typical procedure for the preparation of substituted (1*H*-indol-2-yl)methyl acetate **1(a-e)**

The (1*H*-indol-2-yl)methyl acetates (**1a-d**) and 3-phenyl-2-(1*H*-indol-2-yl)methyl acetates (**1e**) were previously synthesized in our laboratory<sup>1</sup> according to the procedures reported below.

#### 2.1.a Typical procedure for the preparation of (1*H*-indol-2-yl)methyl acetate **1**

(1*H*-indol-2-yl)methyl acetate **1a-d** were prepared according to the two-steps sequence outlined in Scheme 1.

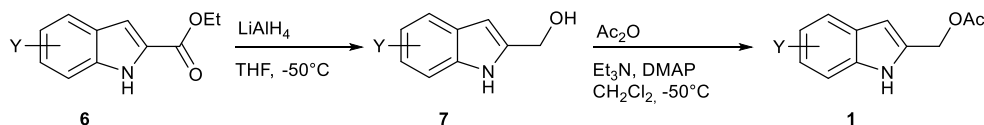

Scheme 1

#### STEP 1: synthesis of (1*H*-indol-2-yl)methanol **7**

A flame dried three-necked round bottom flask, equipped with a magnetic stirring bar, was charged with ethyl 1*H*-indole-2-carboxylate **6** (1.50 g, 8.00 mmol, 1.0 equiv.) dissolved in anhydrous THF (30 mL) under argon. Then, a solution of LiAlH<sub>4</sub> in THF (2 M, 4.4 mL, 8.8 mmol, 1.1 equiv.) was added dropwise at 0°C and the mixture was stirred at room temperature until the disappearance of the starting material, monitoring by TLC (mobile phase for TLC: *n*-hexane-EtOAc, 80:20). The reaction was cooled down to 0°C and quenched with an 80 percent aqueous MeOH solution. The mixture was extracted with Et<sub>2</sub>O, washed with a solution of NaHSO<sub>4</sub> (10% w/w) and with brine. The organic layer was dried over NaSO<sub>4</sub>, filtered, and concentrated under reduced pressure. The resulting crude product was used in the next step without further purification (1.15 g, 98% yield).

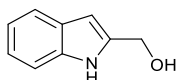

(1*H*-indol-2-yl)methanol **7a**: known compound; 98% yield (1.15 g); yellow solid; mp: 72-74 °C; lit.<sup>2</sup> mp: 72-73 °C; *R<sub>f</sub>* = 0.23 (*n*-hexane-EtOAc, 80:20); IR (neat): 3373, 2856, 1617, 1453, 1289, 1004 cm<sup>-1</sup>; <sup>1</sup>H NMR: (400.13 MHz) (DMSO-*d*<sub>6</sub>): δ 11.0 (s, 1H), 7.46 (d, *J* = 7.8 Hz, 1H), 7.33 (dd, *J*<sub>1</sub> = 7.8 Hz, *J*<sub>2</sub> = 0.7 Hz, 1H), 7.03 (td, *J*<sub>1</sub> = 8.0 Hz, *J*<sub>2</sub> = 1.2 Hz, 1H), 6.94 (td, *J*<sub>1</sub> = 8.0 Hz, *J*<sub>2</sub> = 1.2 Hz, 1H), 6.27 (d, *J* = 1.2 Hz, 1H), 5.22 (t, *J* = 5.6 Hz, 1H), 4.61 (d, *J* = 5.6 Hz, 2H); <sup>13</sup>C NMR (100.6 MHz) (DMSO-*d*<sub>6</sub>): δ 140.6 (C), 136.7 (C), 128.3 (C), 121.0 (CH), 120.1 (CH), 119.1 (CH), 111.5 (CH), 98.9 (CH), 57.4 (CH<sub>2</sub>); HRMS: *m/z* [M + H]<sup>+</sup> calcd for C<sub>9</sub>H<sub>10</sub>NO: 146.0611; found: 146.0599.

### STEP 2: synthesis of (1*H*-indol-2-yl)methyl acetate **1a**

To a stirred solution of (1*H*-indol-2-yl)methanol **7a** (1.00 g, 6.80 mmol, 1.0 equiv.) in pyridine (3mL) was added acetic anhydride (706  $\mu$ L, 7.48 mmol, 1.1 equiv.) were added at 0 °C and the resulting reaction mixture was stirred for 1h. After the consumption of substrate (TLC, *n*-hexane-EtOAc, 85:15), the reaction was diluted with Et<sub>2</sub>O, washed with a saturated NaHCO<sub>3</sub> solution and with brine. The combined organic layer was dried over Na<sub>2</sub>SO<sub>4</sub>, filtered, and concentrated under reduced pressure. The resulting compound **1a** was used in the next step without further purification (1.25 g, 98% yield).

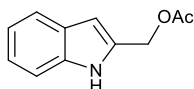

**(1*H*-indol-2-yl)methyl acetate (1a)**: known compound; 98% yield (1.25 g); yellow solid; mp: 104-106 °C; lit.<sup>2</sup> mp: 112 °C;  $R_f = 0.27$  (*n*-hexane-EtOAc, 85:15); IR (neat): 3303, 1726, 1454, 1274, 1045, 805 cm<sup>-1</sup>; <sup>1</sup>H (400.13 MHz) (CDCl<sub>3</sub>):  $\delta = 8.51$  (br s, 1H), 7.52 (d,  $J = 8.0$  Hz, 1H), 7.27 (d,  $J = 8.0$  Hz, 1H), 7.13 (t,  $J = 7.6$  Hz, 1H), 7.00 (t,  $J = 7.6$  Hz, 1H), 6.46 (s, 1H), 5.15 (s, 2H), 2.03 (s, 3H); <sup>13</sup>C NMR (100.6 MHz) (CDCl<sub>3</sub>):  $\delta = 172.3$  (C), 136.6 (C), 133.0 (C), 127.5 (C), 122.8 (CH), 120.9 (CH), 120.1 (CH), 111.1 (CH), 103.9 (CH), 59.8 (CH<sub>2</sub>), 21.0 (CH<sub>3</sub>); HRMS:  $m/z$  [M + H]<sup>+</sup> calcd for C<sub>11</sub>H<sub>10</sub>NO<sub>2</sub>: 188.0717; found: 188.0705.

### 2.1.b Typical procedure for the preparation of (3-phenyl-1*H*-phenyl-2-yl)methyl acetate (**1e**)

(3-phenyl-1*H*-indol-2-yl)methyl acetate **1e** was prepared according to the four-steps sequence outlined in Scheme 2.

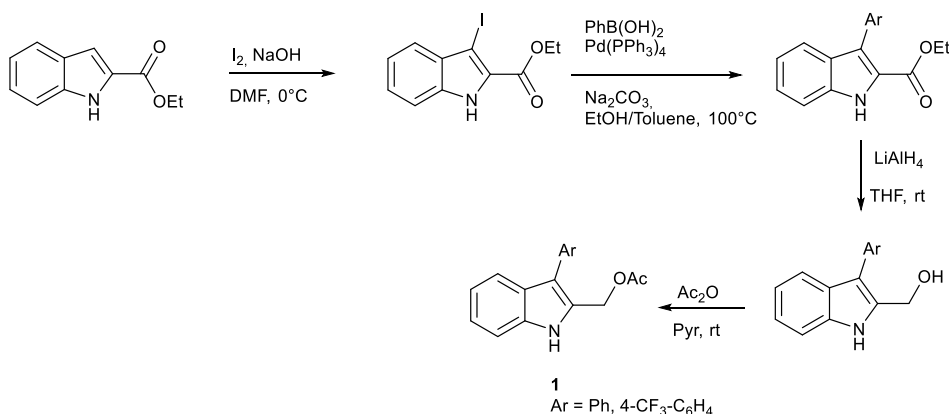

### Scheme 2

#### STEP 1: synthesis of ethyl 3-iodo-1*H*-indole-2-carboxylate

To a solution of ethyl 1*H*-indole-2-carboxylate (1.50 g, 7.92 mmol, 1.0 equiv.) in DMF (9.0 mL) KOH (2.22 g, 39.6 mmol, 5.0 equiv.) was added at 0°C and the resulting mixture was stirred for 10 minutes before a solution of iodine (1.02 g, 8.03 mmol, 1.1 equiv.) in DMF (10.0 mL) was added dropwise over 5 minutes. After 3h, the mixture was poured into a saturated solution of NH<sub>4</sub>Cl and Na<sub>2</sub>S<sub>2</sub>O<sub>3</sub> to precipitate the product. The solid material was filtered off, solubilized in Et<sub>2</sub>O, washed with water and dried over Na<sub>2</sub>SO<sub>4</sub>. After filtration, the mixture was concentrated under reduced pressure to give ethyl 3-iodo-1*H*-indole-2-carboxylate as an off-white powder (2.37 g, 95% yield).

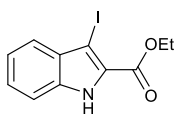

**ethyl 3-iodo-1*H*-indole-2-carboxylate**: known compound; 95% yield (2.37 g); white solid; mp: 133-135 °C; lit.<sup>3</sup> mp: 137-139 °C;  $R_f = 0.23$  (*n*-hexane-EtOAc, 80:20); IR (neat): 3289, 2896, 1686, 1505, 1255, 859 cm<sup>-1</sup>; <sup>1</sup>H NMR: (400.13 MHz) (CDCl<sub>3</sub>):  $\delta = 9.42$  (br s, 1H), 7.60 (d,  $J = 8.4$  Hz, 1H), 7.43-7.38 (m, 2H), 7.28-7.24 (m, 1H),

4.50 (q,  $J = 6.9$  Hz, 2H), 1.50 (t,  $J = 6.9$  Hz, 3H);  $^{13}\text{C}$  NMR (100.6 MHz) ( $\text{CDCl}_3$ ):  $\delta$  161.1 (C), 136.3 (C), 131.6 (C), 127.3 (C), 126.7 (CH), 123.6 (CH), 121.8 (CH), 112.2 (CH), 66.2 (C), 61.7 ( $\text{CH}_2$ ), 14.5 ( $\text{CH}_3$ ); HRMS:  $m/z$  [ $\text{M} + \text{H}$ ] $^+$  calcd for  $\text{C}_{11}\text{H}_{10}\text{INO}_2\text{Na}$ : 337.9648; found: 337.9644.

### STEP 2: synthesis of ethyl 3-phenyl-1H-indole-2-carboxylate

In a three-necked round bottom flask, equipped with a condenser and magnetic stirring bar,  $[\text{Pd}(\text{PPh}_3)_4]$  (439.2 mg, 0.380 mmol, 0.05 equiv) was dissolved at room temperature in 25,0 mL of EtOH/Toluene (2:1) under argon; then, ethyl 3-iodo-1H-indole-2-carboxylate (2.37 g, 7.520 mmol, 1.0 equiv), phenylboronic acid (2.76 g, 22.60 mmol, 3.0 equiv), and  $\text{Na}_2\text{CO}_3$  (2.39 g, 22.6 mmol, 3.0 equiv) were added and the mixture was refluxed for 16 hours. After this time, the mixture was cooled to room temperature, diluted with  $\text{CH}_2\text{Cl}_2$  and washed with brine. The organic layer was dried over  $\text{Na}_2\text{SO}_4$ , filtered, and concentrated under reduced pressure. The residue was purified by chromatography on  $\text{SiO}_2$  (25-40  $\mu\text{m}$ ), eluting with an 80/20 (v/v) *n*-hexane-AcOEt mixture ( $R_f = 0.22$ ) to obtain the ethyl 3-phenyl-1H-indole-2-carboxylate (1.69 g, 85% yield).

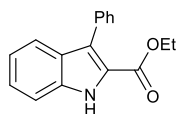

**ethyl 3-phenyl-1H-indole-2-carboxylate:** known compound; 85% yield (1.69 g); yellow solid; mp: 133-135 °C; lit.<sup>4</sup> mp: 133-135 °C;  $R_f = 0.23$  (*n*-hexane-EtOAc, 80:20); IR (neat): 3331, 2916, 1675, 1383, 1254  $\text{cm}^{-1}$ ;  $^1\text{H}$  NMR (400.13 MHz) ( $\text{CDCl}_3$ ):  $\delta$  9.04 (br s, 1H), 7.65 (d,  $J = 8.4$  Hz, 1H), 7.58-7.55 (m, 2H), 7.48-7.44 (m, 3H), 7.41-7.35 (m, 2H), 7.18-7.14 (m, 1H), 4.30 (q,  $J = 7.2$  Hz, 2H), 1.24 (t,  $J = 7.2$  Hz, 3H);  $^{13}\text{C}$  NMR (100.6 MHz) ( $\text{CDCl}_3$ ):  $\delta$  162.1 (C), 135.8 (C), 130.8 (C), 128.1 (CH), 127.9 (CH), 127.3 (CH), 125.9 (CH), 124.4 (C), 122.9 (C), 121.9 (CH), 121.0 (CH), 111.8 (CH), 61.0 (CH), 14.2 ( $\text{CH}_2$ ); HRMS:  $m/z$  [ $\text{M} + \text{Na}$ ] $^+$  calcd for  $\text{C}_{17}\text{H}_{15}\text{NO}_2\text{Na}$ : 288.0995; found: 288.0991.

### STEP 3: synthesis of (3-phenyl-1H-indol-2-yl)methanol 7e

(3-phenyl-1H-indol-2-yl)methanol was synthesized according to the typical procedures outlined for (1H-indol-2-yl)methanol.

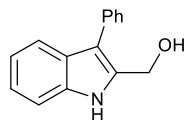

**(3-phenyl-1H-indol-2-yl)methanol (7e):** known compound; 81% yield (1.15 g); brown solid; mp: 88-90 °C; lit.<sup>1a</sup> mp: 88-90.  $R_f = 0.25$  (*n*-hexane-EtOAc, 70:30); IR (neat): 3391, 2917, 1730, 1456, 1384, 1231  $\text{cm}^{-1}$ ;  $^1\text{H}$  NMR (400.13 MHz) ( $\text{CDCl}_3$ ):  $\delta$  8.56 (br s, 1H), 7.73 (d,  $J = 8.4$  Hz, 1H), 7.48-7.46 (m, 4H), 7.37-7.33 (m, 2H), 7.24 (dt,  $J_1 = 8.0$  Hz,  $J_2 = 1.1$  Hz, 1H), 7.16 (dt,  $J_1 = 8.0$  Hz,  $J_2 = 1.1$  Hz, 1H), 4.89 (s, 2 H);  $^{13}\text{C}$  NMR (100.6 MHz) ( $\text{CDCl}_3$ ):  $\delta$  135.7 (C), 134.6 (C), 133.7 (C), 129.5 (CH), 128.8 (CH), 127.4 (C), 126.5 (CH), 122.7 (CH), 120.4 (CH), 119.7 (CH), 115.4 (C), 111.2 (CH), 57.2 ( $\text{CH}_2$ ); HRMS:  $m/z$  [ $\text{M} + \text{H}$ ] $^+$  calcd for  $\text{C}_{15}\text{H}_{12}\text{NO}$ : 222.0924; found: 222.0917.

### STEP 4: synthesis of (3-phenyl-1H-indol-2-yl)methyl acetate (1e)

(3-phenyl-1H-indol-2-yl)methyl acetate **1e** was synthesized according to the typical procedures outlined for **1a**, step 2.

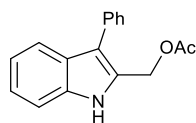

**(3-phenyl-1H-indol-2-yl)methyl acetate (1e):** quantitative yield (1.37 g); yellow solid; mp: 133-135 °C; lit.<sup>1a</sup> mp: 133-135 °C;  $R_f = 0.25$  (*n*-hexane-EtOAc, 80:20); IR (neat): 3391, 2917, 1730, 1456, 1384, 1231  $\text{cm}^{-1}$ ;  $^1\text{H}$  NMR (400.13 MHz) ( $\text{CDCl}_3$ ):  $\delta$  8.71 (br s, 1H), 7.65 (d,  $J = 8.0$  Hz, 1H), 7.47 (d,  $J = 7.5$  Hz, 2H), 7.41 (t,  $J = 7.5$

Hz, 2H), 7.30 (t,  $J = 8.3$  Hz, 2H), 7.17 (d,  $J = 7.0$  Hz, 1H), 7.06 (t,  $J = 7.5$  Hz, 1H), 5.19 (s, 2H), 2.06 (s, 3H);  $^{13}\text{C}$  NMR (100.6 MHz) ( $\text{CDCl}_3$ ):  $\delta$  172.8 (C), 135.8 (C), 134.2 (C), 129.8 (CH), 129.4 (C), 128.8 (CH), 126.8 (CH), 126.7 (C) 123.5 (CH), 120.4 (CH), 120.2(CH), 118.8 (C), 111.4(CH), 58.5 ( $\text{CH}_2$ ), 21.2 ( $\text{CH}_3$ ); HRMS:  $m/z$  [ $\text{M} + \text{H}$ ] $^+$  calcd for  $\text{C}_{17}\text{H}_{14}\text{NO}_2$ : 288.0995; found: 288.0997.

## 2.2. Typical procedure for the preparation of methyl *N*-benzil L-phenylalaninate **9**<sup>5</sup>

A round bottom flask, equipped with a magnetic stirring bar, was charged with L-Phenylalanine methyl ester hydrochloride (1 g, 5.12 mmol, 1.0 equiv.), triethylamine (644  $\mu\text{L}$ , 5.12 mmol, 1.0 equiv.), benzaldehyde (521  $\mu\text{L}$ , 5.63 mmol, 1.1 equiv.) and MeOH (10 mL) were added and the mixture was stirred for 2 hours. Then,  $\text{NaBH}_4$  (387 mg, 10.24 mmol, 2.0 equiv.) was added portion wise at  $0^\circ\text{C}$  and the mixture was stirred for 3h. The resulting mixture was diluted with  $\text{EtO}_2$  and washed with brine. The organic layer was dried over  $\text{NaSO}_4$ , filtered, and concentrated under reduced pressure. The resulting crude product was used in the next step without further purification (960 mg, 81% yield).

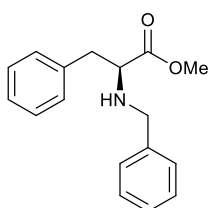

**methyl benzil-L-phenylalaninate 9a**: 80% yield (1.1 g); white oil;  $R_f = 0.21$  (*n*-hexane-EtOAc, 90:10); IR (neat): 3030, 1733, 1453, 1200, 749  $\text{cm}^{-1}$ ;  $^1\text{H}$  NMR (400.13 MHz) ( $\text{CDCl}_3$ ):  $\delta$  7.29 - 7.15 (m, 10H), 3.81 (d,  $J = 13.2$  Hz, 1H), 3.642 (d,  $J = 13.2$  Hz, 1H), 3.640 (s, 1H), 3.55 (t,  $J = 6.9$  Hz, 1H), 2.97 (d,  $J = 7.6$  Hz, 2H), 2.23 (s, 1H);  $^{13}\text{C}$  NMR (100.6 MHz) ( $\text{CDCl}_3$ )  $\delta$  175.1 (C), 139.6 (C), 137.3 (C), 129.3 (CH), 128.5 (CH), 128.4 (CH), 128.2 (CH) 127.1 (CH), 126.7 (CH), 62.1 (CH), 52.0 ( $\text{CH}_2$ ), 51.7 (CH), 19.4 ( $\text{CH}_2$ ), 39.8 ( $\text{CH}_2$ ). HRMS:  $m/z$  [ $\text{M} + \text{H}$ ] $^+$  calcd for  $\text{C}_{17}\text{H}_{20}\text{NO}_2$ : 270.1489; found: 270.1487.

## 3. SYNTHETIC PROCEDURES FOR FINAL COMPOUNDS

### 3.1. Typical procedure for the preparation of 3-benzyl-2,3-dihydropyrazino[1,2-*a*]indol-4(1*H*)-one **5**:

In a 50 mL Carousel Tube Reactor (Radely Discovery Technology) containing a magnetic stirring bar (1*H*-indol-2-yl)methyl acetate **1a** (76.4 mg, 0.404 mmol, 1.00 equiv.) was dissolved at room temperature with 2.0 mL of anhydrous MeCN. Then, methyl L-phenylalaninate **4a** (357.5 mg, 2.020 mmol, 5.0 equiv.),  $\text{K}_2\text{CO}_3$  (112.0 mg, 0.808 mmol, 2.0 equiv.), and 1.0 mL of solvent were added. The mixture was stirred for 18h at  $120^\circ\text{C}$ . After this time, the reaction mixture was cooled to room temperature, diluted with  $\text{Et}_2\text{O}$ , washed with a saturated  $\text{NaHCO}_3$  solution and with brine. The organic extract was dried over  $\text{Na}_2\text{SO}_4$ , filtered, and concentrated under reduced pressure. The residue was purified by chromatography on  $\text{SiO}_2$  (25-40  $\mu\text{m}$ ), eluting with a 80/20 (v/v) *n*-hexane/AcOEt mixture ( $R_f = 0.21$ ) to obtain 81.0 mg (73% yield) of 3-benzyl-2,3-dihydropyrazino[1,2-*a*]indol-4(1*H*)-one **5a** and 7.0 mg (8% yield) of 2-((1*H*-indol-2-yl)methyl)-3-benzyl-2,3-dihydropyrazino[1,2-*a*]indol-4(1*H*)-one **8a**.

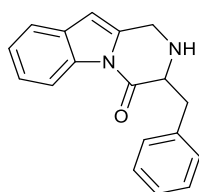

**3-benzyl-2,3-dihydropyrazino[1,2-*a*]indol-4(1*H*)-one 5a**: 73% yield (81.0 mg); brown solid; mp: 120-123  $^\circ\text{C}$ ;  $R_f = 0.21$  (*n*-hexane-EtOAc, 80:20); IR (neat): 2989, 2796, 1444, 1272, 1183, 941, 734  $\text{cm}^{-1}$ ;  $^1\text{H}$  NMR (400.13 MHz) ( $\text{CDCl}_3$ ):  $\delta$  8.36 (d,  $J = 8.0$  Hz, 1H), 7.39 (d,  $J = 7.6$  Hz, 1H), 7.27-7.16 (m, 7H), 6.17 (s, 1H), 4.11 (d,  $J = 16$

Hz, 1H), 3.88 (d,  $J = 16$  Hz, 1H), 3.79 (dd,  $J_1 = 8.7$  Hz,  $J_2 = 4.0$  Hz, 1H), 3.44 (dd,  $J_1 = 14$  Hz,  $J_2 = 4.0$  Hz, 1H), 3.06 (dd,  $J_1 = 14.0$  Hz,  $J_2 = 8.7$  Hz, 1H), 1.79 (s, 1H);  $^{13}\text{C}$  NMR (100.6 MHz) ( $\text{CDCl}_3$ ):  $\delta$  169.1 (C), 137.5 (C), 136.6 (C), 134.7 (C), 129.5 (CH), 128.8 (CH), 127.0 (CH), 124.5 (CH), 124.2 (CH), 120.2 (CH), 116.3 (CH), 103.1 (CH), 61.3 (CH), 41.9 ( $\text{CH}_2$ ), 36.3 ( $\text{CH}_2$ ); HRMS:  $m/z$  [ $\text{M} + \text{H}$ ] $^+$  calcd for  $\text{C}_{15}\text{H}_{17}\text{NO}_2$ : 277.1335; found: 277.1336.

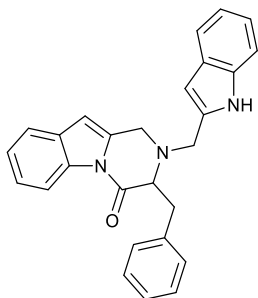

**2-((1H-indol-2-yl)methyl)-3-benzyl-2,3-dihydropyrazino[1,2-*a*]indol-4(1H)-one 8a**: 8% yield (7.0 mg); yellow solid; mp: 107-110 °C;  $R_f = 0.22$  (*n*-hexane-EtOAc, 85:15); IR (neat): 3361, 2986, 2808, 1692, 1356, 1188, 691  $\text{cm}^{-1}$ ;  $^1\text{H}$  NMR (400.13 MHz) ( $\text{CDCl}_3$ ):  $\delta$  8.40 (d,  $J = 7.9$  Hz, 1H), 7.48 (d,  $J = 6.8$  Hz, 1H), 7.41 - 7.18 (m, 10H), 7.06 - 7.02 (m, 1H), 7.00 - 6.94 (m, 2H), 6.36 (s, 1H), 6.11 (s, 1H), 4.43 (dd,  $J_1 = 16.7$ ,  $J_2 = 1.8$  Hz, 1H), 3.89 - 3.82 (m, 2H), 3.74 - 3.69 (m, 2H), 3.25 (dd,  $J_1 = 14.1$ ,  $J_2 = 4.3$  Hz, 1H), 3.09 (dd,  $J_1 = 14.2$ ,  $J_2 = 11.5$  Hz, 1H);  $^{13}\text{C}$  NMR (100.6 MHz) ( $\text{CDCl}_3$ ):  $\delta$  168.8 (C), 138.3 (C), 136.0 (C), 134.9 (C), 134.6 (C), 133.9 (C), 129.7 (C), 129.5 (CH), 128.8 (CH), 128.3 (C), 127.1 (CH), 124.9 (CH), 124.6 (CH), 121.7 (CH), 120.5 (CH), 120.2 (CH), 119.7 (CH), 116.5 (CH), 111.0 (CH), 105.8 (CH), 101.5 (CH), 64.6 (CH), 52.0 ( $\text{CH}_2$ ), 43.5 ( $\text{CH}_2$ ), 35.6 ( $\text{CH}_2$ ). HRMS:  $m/z$  [ $\text{M} + \text{H}$ ] $^+$  calcd for  $\text{C}_{27}\text{H}_{24}\text{N}_3\text{O}$ : 406.1914; found: 406.1915.

### 3.2. Typical procedure for the preparation of 2,3-dibenzyl-2,3-dihydropyrazino[1,2-*a*]indol-4(1H)-one 10:

In a 50 mL Carousel Tube Reactor (Radely Discovery Technology) containing a magnetic stirring bar (1H-indol-2-yl)methyl acetate (54.9 mg, 0.290 mmol, 1.0 equiv.) was dissolved at room temperature with 2.0 mL of anhydrous MeCN. Then, methyl benzyl L-phenylalaninate (369.8 mg, 1.450 mmol, 5.0 equiv.),  $\text{K}_2\text{CO}_3$  (80.0 mg, 0.580 mmol, 2.0 equiv.), and 1.0 mL of solvent were added. The mixture was stirred for 24h at 120 °C. After this time, the reaction mixture was cooled to room temperature, diluted with  $\text{Et}_2\text{O}$ , washed with a saturated  $\text{NaHCO}_3$  solution, and with brine. The organic extract was dried over  $\text{Na}_2\text{SO}_4$ , filtered, and concentrated under reduced pressure. The residue was purified by chromatography on  $\text{SiO}_2$  (25-40  $\mu\text{m}$ ), eluting with a 96/4 (v/v) *n*-hexane/AcOEt mixture ( $R_f = 0.21$ ) to obtain 89.2 mg (84% yield) of 2,3-dibenzyl-2,3-dihydropyrazino[1,2-*a*]indol-4(1H)-one **10a**.

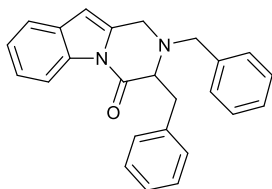

**2,3-dibenzyl-2,3-dihydropyrazino[1,2-*a*]indol-4(1H)-one 10a**: 84% yield (89.2 mg); pale pink solid; mp: 115-116 °C;  $R_f = 0.21$  (*n*-hexane-EtOAc, 96:4); IR (neat): 3024, 1782, 1450, 1373, 695  $\text{cm}^{-1}$ ;  $^1\text{H}$  NMR (400.13 MHz) ( $\text{CDCl}_3$ ):  $\delta$  8.54 (d,  $J = 7.9$  Hz, 1H), 7.58 (d,  $J = 7.2$  Hz, 1H), 7.43 - 7.31 (m, 7H), 7.29 - 7.22 (m, 3H), 7.05 - 7.03 (m, 2H), 6.41 (s, 1H), 4.39 (dd,  $J_1 = 16.9$ ,  $J_2 = 1.7$  Hz, 1H), 3.93 (d,  $J = 4.4$  Hz, 1H), 3.90 (d,  $J = 7.2$  Hz, 1H), 3.82 (d,  $J = 13.3$  Hz, 1H), 3.66 (d,  $J = 13.3$  Hz, 1H), 3.35 (dd,  $J_1 = 14.4$ ,  $J_2 = 4.9$  Hz, 1H), 3.25 (dd,  $J_1 = 14.4$ ,  $J_2 = 10.1$  Hz, 1H);  $^{13}\text{C}$  NMR (100.6 MHz) ( $\text{CDCl}_3$ ):  $\delta$  169.4 (C), 138.2 (C), 137.6 (C), 134.9 (C), 134.6 (C), 129.7 (C), 129.4 (CH), 128.8 (CH), 128.4 overlapping (CH), 127.5 (CH), 126.7 (CH), 124.6 (CH), 124.3 (CH), 120.3 (CH), 116.5 (CH), 105.4 (CH), 66.4 (CH), 58.1 ( $\text{CH}_2$ ), 43.1 ( $-\text{CH}_2$ ), 35.5 ( $\text{CH}_2$ ); HRMS:  $m/z$  [ $\text{M} + \text{H}$ ] $^+$  calcd for  $\text{C}_{25}\text{H}_{23}\text{N}_2\text{O}$ : 367.1805; found: 367.1804.

## 4. CHARACTERIZATION DATA OF STARTING MATERIALS

### 4.1. Characterization data of (1*H*-indol-2-yl)methanols **7**

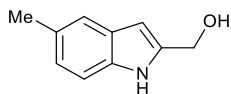

**(5-methyl-1*H*-indol-2-yl)methanol 7b**: known compound; 98% yield (1.25 g); orange solid; mp: 77-79 °C; lit.<sup>2</sup> mp: 77-79 °C;  $R_f = 0.25$  (*n*-hexane-EtOAc, 75:25); IR (neat): 3346, 2932, 1623, 1487, 1197, 1025  $\text{cm}^{-1}$ ;  $^1\text{H}$  NMR (400.13 MHz) ( $\text{CDCl}_3$ ):  $\delta$  8.15 (br s, 1H), 7.28 (s, 1H), 7.12 (d,  $J = 8.3$  Hz, 1H), 6.93 (d,  $J = 8.3$  Hz, 1H), 6.23 (br s, 1H), 4.67 (s, 2H), 2.36 (s, 3H), 1.94 (br s, 1H);  $^{13}\text{C}$  NMR (100.6 MHz) ( $\text{CDCl}_3$ ):  $\delta$  137.6 (C), 134.7 (C), 129.2 (C), 128.4 (C), 123.8 (CH), 120.3 (CH), 110.6 (CH), 100.1 (CH), 58.8 ( $\text{CH}_2$ ), 21.4 ( $\text{CH}_3$ ); HRMS:  $m/z$  [ $\text{M} + \text{H}$ ]<sup>+</sup> calcd for  $\text{C}_{10}\text{H}_{12}\text{NO}$ : 162.0913; found: 162.0917.

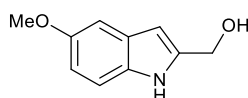

**(5-methoxy-1*H*-indol-2-yl)methanol 7c**: known compound; 97% yield (1.363 g); mp: 64 -66 °C; lit.<sup>6</sup> mp: 67-69 °C; orange solid;  $R_f = 0.18$  (*n*-hexane-EtOAc, 80:20); IR (neat): 3463, 3279, 2932, 1312, 1016, 788  $\text{cm}^{-1}$ ;  $^1\text{H}$  NMR (400.13 MHz) ( $\text{CDCl}_3$ ):  $\delta$  8.18 (bs, 1H), 7.12 (d,  $J = 8.7$  Hz, 1H), 6.96 (d,  $J = 2.4$  Hz, 1H), 6.76 (dd,  $J_1 = 8.7$  Hz,  $J_2 = 2.4$  Hz, 1H), 6.25 (s, 1H), 4.69 (s, 2H), 3.76 (s, 3H);  $^{13}\text{C}$  NMR (100.6 MHz) ( $\text{CDCl}_3$ ):  $\delta$  154.2 (C), 138.3 (C), 131.5 (C), 128.6 (C), 112.4 (CH), 111.7 (CH), 102.4 (CH), 100.4 (CH), 58.8 ( $\text{CH}_2$ ), 55.9 ( $\text{CH}_3$ ); HRMS:  $m/z$  [ $\text{M} + \text{H}$ ]<sup>+</sup> calcd for  $\text{C}_{10}\text{H}_{12}\text{NO}_2$ : 178.0863; found: 178.0860.

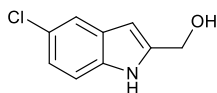

**(5-chloro-1*H*-indol-2-yl)methanol 7d**: known compound; 98% yield (1.41 g); yellow solid; mp: 102-104 °C; lit.<sup>7</sup> mp: 101.9-103.8 °C;  $R_f = 0.23$  (*n*-hexane-EtOAc, 75:25); IR (neat): 3383, 3097, 2916, 1450, 1384, 1017  $\text{cm}^{-1}$ ;  $^1\text{H}$  NMR (400.13 MHz) ( $\text{CDCl}_3$ ):  $\delta$  8.39 (br s, 1H), 7.45 (s, 1H), 7.18 (d,  $J = 7.4$  Hz, 1H), 7.04 (dd,  $J_1 = 8.6$  Hz,  $J_2 = 2.0$  Hz, 1H), 6.26 (d, 1H), 5.30 (t,  $J = 5.5$  Hz, 1H), 4.73 (s, 2H), 2.00 (br s, 1H);  $^{13}\text{C}$  NMR (100.6 MHz) ( $\text{CDCl}_3$ ):  $\delta$  139.1 (C), 134.8 (C), 129.3 (C), 125.6 (C), 122.6 (CH), 120.1 (CH), 112.0 (CH), 100.2 (CH), 58.7 ( $\text{CH}_2$ ); HRMS:  $m/z$  [ $\text{M} + \text{H}$ ]<sup>+</sup> calcd for  $\text{C}_9\text{H}_9\text{ClNO}$ : 182.0367; found: 182.0366.

### 4.2. Characterization data of 1 (1*H*-indol-2-yl)methyl acetates **1**

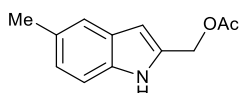

**(5-methyl-1*H*-indol-2-yl)methyl acetate 1b**: known compound; brown solid; 98% yield (1.49 g); mp: 84-86 °C; lit.<sup>2</sup> mp: 87-88 °C;  $R_f = 0.24$  (*n*-hexane-EtOAc, 75:25); IR (neat): 3427, 1718, 1361, 806  $\text{cm}^{-1}$ ;  $^1\text{H}$  NMR (400.13 MHz) ( $\text{CDCl}_3$ ):  $\delta$  8.42 (br s, 1H), 7.31 (q,  $J = 0.80$  Hz, 1H), 7.16 (d,  $J = 8.2$  Hz, 1H), 6.96 (dd,  $J_1 = 8.2$  Hz,  $J_2 = 1.6$  Hz, 1H), 6.38 (d,  $J = 1.6$  Hz, 1H), 5.14 (s, 2H), 2.36 (s, 3H), 2.03 (s, 3H);  $^{13}\text{C}$  NMR (100.6 MHz) ( $\text{CDCl}_3$ ):  $\delta$  172.3 (C), 134.9 (C), 133.1 (C), 129.2 (C), 127.8 (C), 124.5 (CH), 120.5 (CH), 110.8 (CH), 103.4 (CH), 59.8 ( $\text{CH}_2$ ), 21.5 ( $\text{CH}_3$ ), 21.0 ( $\text{CH}_3$ ); HRMS:  $m/z$  [ $\text{M} + \text{Na}$ ]<sup>+</sup> calcd for  $\text{C}_{12}\text{H}_{15}\text{NO}_2\text{Na}$ : 226.0838; found: 226.0838.

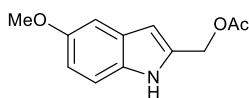

**(5-methoxy-1H-indol-2-yl)methyl acetate 1c:** known compound; 98% yield (7.47 mmol scale, 1.606 g); pink solid; mp: 87-89 °C; lit.<sup>8</sup> mp: 87-88 °C;  $R_f$  = 0.27 (*n*-hexane-EtOAc, 75:25); IR (neat): 3383, 1711, 1487, 1225, 1018, 790  $\text{cm}^{-1}$ ;  $^1\text{H}$  NMR (400.13 MHz) ( $\text{CDCl}_3$ ):  $\delta$  8.40 (br s, 1H), 7.16 (d,  $J$  = 8.8 Hz, 1H), 6.97 (d,  $J$  = 2.5 Hz, 1H), 6.80 (dd,  $J_1$  = 8.8 Hz,  $J_2$  = 2.5 Hz, 1H), 6.39 (d,  $J$  = 1.5 Hz, 1H), 5.12 (s, 2H), 3.76 (s, 3H), 2.02 (s, 3H);  $^{13}\text{C}$  NMR (100.6 MHz) ( $\text{CDCl}_3$ ):  $\delta$  172.3 (C), 154.3 (C), 133.7 (C), 131.8 (C), 128.0 (C), 113.3 (CH), 111.9 (CH), 103.7 (CH), 102.3 (CH), 59.8 ( $\text{CH}_2$ ), 55.8 ( $\text{CH}_3$ ), 21.0 ( $\text{CH}_3$ ); HRMS:  $m/z$  [ $\text{M} + \text{H}$ ]<sup>+</sup> calcd for  $\text{C}_{12}\text{H}_{13}\text{NO}_3$ : 218.0823; found: 218.0818.

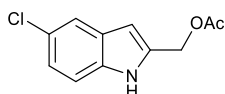

**(5-chloro-1H-indol-2-yl)methyl acetate 1d:** 98% yield (1.64 g); yellow solid; mp: 93-95 °C;  $R_f$  = 0.25 (*n*-hexane-EtOAc, 85:15); IR (neat): 3362, 2919, 1445, 1383, 1238  $\text{cm}^{-1}$ ;  $^1\text{H}$  NMR (400.13 MHz) ( $\text{CDCl}_3$ ):  $\delta$  8.65 (br s, 1H), 7.56 (d,  $J$  = 1.6 Hz, 1H), 7.25 (d,  $J$  = 8.5 Hz, 1H), 7.15 (dd,  $J_1$  = 8.5 Hz,  $J_2$  = 2.1 Hz, 1H), 6.47 (d,  $J$  = 1.6 Hz, 1H), 5.20 (s, 2H), 2.12 (s, 3H);  $^{13}\text{C}$  NMR (100.6 MHz) ( $\text{CDCl}_3$ ):  $\delta$  172.5 (C), 135.0 (C), 134.6 (C), 128.7 (C), 125.7 (C), 123.2 (CH), 120.4 (CH), 112.3 (CH), 103.6 (CH), 59.7 ( $\text{CH}_2$ ), 21.1 ( $\text{CH}_3$ ); HRMS:  $m/z$  [ $\text{M} + \text{H}$ ]<sup>+</sup> calcd for  $\text{C}_{11}\text{H}_{10}\text{ClNO}_2$ : 222.0327; found: 222.0320.

#### 4.3. Characterization data of *N*-benzyl $\alpha$ -amino acids alkyl esters 9

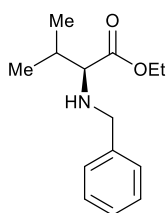

**ethyl benzyl-L-valinate 9b:** 82% yield (0.976 g); pale yellow oil;  $R_f$  = 0.22 (*n*-hexane-EtOAc, 90:10); IR (neat): 2945, 1718, 1462, 1110, 751  $\text{cm}^{-1}$ ;  $^1\text{H}$  NMR (400 MHz) ( $\text{CDCl}_3$ )  $\delta$  7.27 - 7.13 (m, 5H), 4.11 - 4.07 (m, 2H), 3.75 (d,  $J$  = 13.1 Hz, 1H), 3.51 (d,  $J$  = 13.1 Hz, 1H), 2.91 (d,  $J$  = 6.1 Hz, 1H), 1.86 - 1.80 (m, 1H), 1.72 (s, 1H), 1.19 (t,  $J$  = 7.2 Hz, 3H), 0.88 - 0.85 (m, 6H);  $^{13}\text{C}$  NMR (100.6 MHz) ( $\text{CDCl}_3$ )  $\delta$  175.3 (C), 140.3 (C), 128.3 (CH), 128.3 (CH), 127.0 (CH), 66.7 (CH), 60.4 ( $\text{CH}_2$ ), 52.6 ( $\text{CH}_2$ ), 31.8 (CH), 19.4 ( $\text{CH}_3$ ), 18.7 ( $\text{CH}_3$ ), 14.5 ( $\text{CH}_3$ ). HRMS:  $m/z$  [ $\text{M} + \text{H}$ ]<sup>+</sup> calcd for  $\text{C}_{14}\text{H}_{22}\text{NO}_2$ : 236.1645; found: 236.1645.

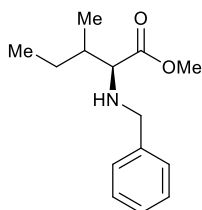

**methyl (2S)-2-(benzylamino)-3-methylpentanoate 9c:** 84% yield (1.01 g); pale yellow oil;  $R_f$  = 0.22 (*n*-hexane-EtOAc, 90:10); IR (neat): 2960, 1729, 1458, 1109, 748  $\text{cm}^{-1}$ ;  $^1\text{H}$  NMR (400 MHz) ( $\text{CDCl}_3$ )  $\delta$  7.38 - 7.25 (m, 5H), 3.85 (d,  $J$  = 13.0 Hz, 1H), 3.74 (s, 3H), 3.62 (d,  $J$  = 13.1 Hz, 1H), 3.13 (d,  $J$  = 6.2 Hz, 1H), 1.91 (s, 1H), 1.77 - 1.56 (m, 1H), 1.30 - 1.18 (m, 1H), 0.93 - 0.87 (m, 6H);  $^{13}\text{C}$  NMR (101 MHz) ( $\text{CDCl}_3$ )  $\delta$  175.8 (C), 140.1 (C), 128.32 (C),



128.31 (CH), 127.0 (CH), 65.5 (CH), 52.6 (CH<sub>2</sub>), 51.4 (CH<sub>3</sub>), 38.4 (CH), 25.6 (CH<sub>2</sub>), 15.7 (CH<sub>3</sub>), 11.5 (CH<sub>3</sub>); HRMS:  $m/z$  [M + H]<sup>+</sup> calcd for C<sub>14</sub>H<sub>22</sub>NO<sub>2</sub>: 236.1645; found: 236.1645.

## 5. CHARACTERIZATION DATA OF FINAL PRODUCTS

### 5.1. Characterization data of 3-substituted-2,3-dihydropyrazino[1,2-*a*]indol-4(1*H*)-ones 5, 8, 11-13

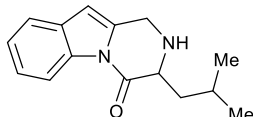

**3-isobutyl-2,3-dihydropyrazino[1,2-*a*]indol-4(1*H*)-one 5b:** 59% yield (57.7 mg); brown solid; mp: 126-128 °C;  $R_f$  = 0.21 (*n*-hexane-EtOAc, 80:20); IR (neat): 2976, 2808, 1704, 1260, 1210, 941, 733 cm<sup>-1</sup>; <sup>1</sup>H NMR (400.13 MHz) (CDCl<sub>3</sub>): δ 8.38 (d,  $J$  = 7.9 Hz, 1H), 7.46 (d,  $J$  = 7.1 Hz, 1H), 7.29 - 7.22 (m, 2H), 6.24 (s, 1H), 4.20 (d,  $J$  = 16.5 Hz, 1H), 4.01 (d,  $J$  = 16.5 Hz, 1H), 3.64 (dd,  $J_1$  = 9.8,  $J_2$  = 3.9 Hz, 1H), 2.05 - 1.89 (m, 2H), 1.87 (br s, 1H), 1.65 - 1.58 (m, 1H), 1.00 (t,  $J$  = 6.3 Hz, 6H); <sup>13</sup>C NMR (100.6 MHz) (CDCl<sub>3</sub>): δ 170.9 (C), 137.1 (C), 134.8 (C), 129.5 (C), 124.4 (CH), 124.1 (CH), 120.2 (CH), 116.3 (CH), 102.7 (CH), 58.1 (CH), 41.0 (CH<sub>2</sub>), 39.1 (CH<sub>2</sub>), 24.9 (CH), 23.4 (CH<sub>3</sub>), 21.4 (CH<sub>3</sub>); HRMS:  $m/z$  [M + H]<sup>+</sup> calcd for C<sub>15</sub>H<sub>15</sub>N<sub>2</sub>O: 243.1492; found: 243.1492.

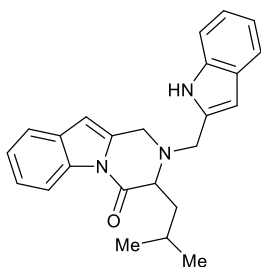

**2-((1*H*-indol-2-yl)methyl)-3-isobutyl-2,3-dihydropyrazino[1,2-*a*]indol-4(1*H*)-one 8b:** 32% yield (23.9 mg); pale yellow solid; mp: 96-100 °C;  $R_f$  = 0.21 (*n*-hexane-EtOAc, 90:10); IR (neat): 3413, 2995, 2814, 1702, 1365, 1160, 683 cm<sup>-1</sup>; <sup>1</sup>H NMR (400.13 MHz) (CDCl<sub>3</sub>): δ 8.36 (d,  $J$  = 8.0 Hz, 1H), 8.20 (br s, 1H), 7.48 - 7.42 (m, 2H), 7.27 - 7.17 (m, 3H), 7.10 (t,  $J$  = 7.0 Hz, 1H), 7.02 (t,  $J$  = 7.0 Hz, 1H), 6.24 (s, 2H), 4.11 (d,  $J$  = 18.6 Hz, 1H), 3.86 - 3.74 (m, 3H), 3.63 - 3.59 (m, 1H), 1.92 - 1.89 (m, 1H), 1.84 - 1.76 (m, 1H), 1.70 - 1.63 (m, 1H), 0.96 (d,  $J$  = 6.7 Hz, 3H), 0.87 (d,  $J$  = 6.7 Hz, 3H); <sup>13</sup>C NMR (100.6 MHz) (CDCl<sub>3</sub>): δ 170.1 (C), 136.3 (C), 134.9 (C), 134.8 (C), 133.9 (C), 129.7 (C), 128.4 (C), 124.7 (CH), 124.4 (CH), 122.1 (CH), 120.5 (CH), 120.3 (CH), 120.0 (CH), 116.6 (CH), 110.9 (CH), 105.6 (CH), 102.6 (CH), 63.4 (CH), 51.6 (CH<sub>2</sub>), 42.7 (CH<sub>2</sub>), 38.2 (CH<sub>2</sub>), 25.2 (CH), 23.2 (CH<sub>3</sub>), 21.8 (CH<sub>3</sub>); HRMS:  $m/z$  [M + Na]<sup>+</sup> calcd for C<sub>24</sub>H<sub>25</sub>N<sub>3</sub>O<sub>2</sub>Na: 394.1890; found: 394.1890.

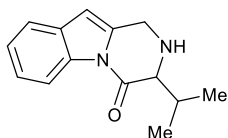

**3-isopropyl-2,3-dihydropyrazino[1,2-*a*]indol-4(1*H*)-one 5c:** 71% yield (65.4 mg); brown solid; mp: 116-118 °C;  $R_f$  = 0.21 (*n*-hexane-EtOAc, 86:14); IR (neat): 2978, 2901, 1694, 1271, 1220, 957, 740 cm<sup>-1</sup>; <sup>1</sup>H NMR (400.13 MHz) (CDCl<sub>3</sub>): δ 8.43 (d,  $J$  = 7.9 Hz, 1H), 7.50 - 7.42 (d,  $J$  = 8.6 Hz, 1H), 7.33 - 7.24 (m, 2H), 6.28 (s, 1H), 4.29 (d,  $J$  = 16.2 Hz, 1H), 4.02 (d,  $J$  = 16.2 Hz, 1H), 3.48 (d,  $J$  = 4.0 Hz, 1H), 2.75 - 2.67 (m, 1H), 1.85 (br s, 1H), 1.16 (d,  $J$  = 7.0 Hz, 3H), 1.00 (d,  $J$  = 7.0 Hz, 3H); <sup>13</sup>C NMR (100.6 MHz) (CDCl<sub>3</sub>): δ 169.8 (C), 137.2 (C), 134.8 (C), 129.6 (CH), 124.4 (CH), 124.2 (CH), 120.2 (CH), 116.4 (CH), 102.7 (CH), 65.5 (CH), 42.0 (CH<sub>2</sub>), 28.3 (CH), 20.0 (CH<sub>3</sub>), 17.5 (CH<sub>3</sub>); HRMS:  $m/z$  [M + H]<sup>+</sup> calcd for C<sub>14</sub>H<sub>17</sub>N<sub>2</sub>O: 229.1335; found: 229.1334.

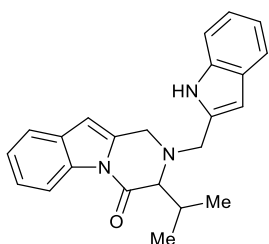

**2-((1H-indol-2-yl)methyl)-3-isopropyl-2,3-dihydropyrazino[1,2-a]indol-4(1H)-one 8c:** 13 % yield (10.0 mg); brown wax;  $R_f = 0.22$  (*n*-hexane-EtOAc, 90:10); IR (neat): 3339, 2998, 2814, 1682, 1266, 1180, 688  $\text{cm}^{-1}$ ;  $^1\text{H}$  (400.13 MHz) ( $\text{CDCl}_3$ ):  $\delta$  8.49 (d,  $J = 8\text{ Hz}$ , 1H), 8.32 (br s, 1H), 7.58 (d,  $J = 8.0\text{ Hz}$ , 1H), 7.54 (d,  $J = 7.4\text{ Hz}$ , 1H), 7.40 - 7.28 (m, 3H), 7.22 (t,  $J = 7.4\text{ Hz}$ , 1H), 7.13 (t,  $J = 7.4\text{ Hz}$ , 1H), 6.35 (s, 2H), 4.30 (d,  $J = 17.0\text{ Hz}$ , 1H), 3.99 - 3.88 (m, 3H), 3.14 (d,  $J = 10.0\text{ Hz}$ , 1H), 2.27 - 2.20 (m, 1H), 1.26 (d,  $J = 6.6\text{ Hz}$ , 3H), 1.16 (d,  $J = 6.6\text{ Hz}$ , 3H);  $^{13}\text{C}$  NMR (100.6 MHz) ( $\text{CDCl}_3$ ):  $\delta$  168.9 (C), 136.2 (C), 134.8 (C), 134.7 (C), 133.9 (C), 129.6 (C), 128.3 (C), 124.5 (CH), 124.2 (CH), 121.9 (CH), 120.4 (CH), 120.1 (CH), 119.8 (CH), 116.5 (CH), 110.7 (CH), 105.2 (CH), 102.4 (CH), 71.3 (CH), 52.5 ( $\text{CH}_2$ ), 42.4 ( $\text{CH}_2$ ), 28.6 (CH), 21.1 ( $\text{CH}_3$ ), 20.0 ( $\text{CH}_3$ ); HRMS:  $m/z$  [ $\text{M} + \text{Na}$ ] $^+$  calcd for  $\text{C}_{25}\text{H}_{15}\text{N}_3\text{ONa}$ : 380.1733; found: 380.1733.

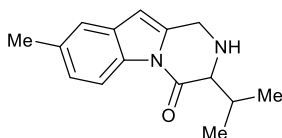

**3-isopropyl-8-methyl-2,3-dihydropyrazino[1,2-a]indol-4(1H)-one 5d:** 76% yield (74.4 mg); pale brown solid; mp: 91-93  $^\circ\text{C}$ ;  $R_f = 0.22$  (*n*-hexane-EtOAc, 85:15); IR (neat): 2996, 2891, 1697, 1282, 1243, 949, 731  $\text{cm}^{-1}$ ;  $^1\text{H}$  (400.13 MHz) ( $\text{CDCl}_3$ ):  $\delta$  8.28 (d,  $J = 8.3\text{ Hz}$ , 1H), 7.26 (s, 1H), 7.11 (d,  $J = 8.3\text{ Hz}$ , 1H), 6.19 (s, 1H), 4.24 (d,  $J = 16.3\text{ Hz}$ , 1H), 3.98 (d,  $J = 16.3\text{ Hz}$ , 1H), 3.43 (d,  $J = 4.5\text{ Hz}$ , 1H), 2.73 - 2.65 (m, 1H), 2.43 (s, 3H), 1.87 (br s, 1H), 1.14 (d,  $J = 6.9\text{ Hz}$ , 3H), 0.98 (d,  $J = 6.9\text{ Hz}$ , 3H);  $^{13}\text{C}$  NMR (100.6 MHz) ( $\text{CDCl}_3$ ):  $\delta$  169.5 (C), 137.2 (C), 133.7 (C), 132.9 (C), 129.8 (C), 125.6 (CH), 120.2 (CH), 115.9 (CH), 102.4 (CH), 65.3 (CH), 41.9 ( $\text{CH}_2$ ), 28.1 ( $\text{CH}_3$ ), 21.5 (CH), 20.0 ( $\text{CH}_3$ ), 17.4 ( $\text{CH}_3$ ); HRMS:  $m/z$  [ $\text{M} + \text{H}$ ] $^+$  calcd for  $\text{C}_{15}\text{H}_{15}\text{N}_2\text{O}$ : 243.1492; found: 243.14920.

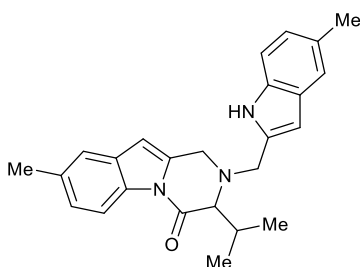

**2-((1H-indol-2-yl)methyl)-3-isopropyl-8-methyl-2,3-dihydropyrazino[1,2-a]indol-4(1H)-one 8d:** 19% yield (15.0 mg); yellow oil;  $R_f = 0.21$  (*n*-hexane-EtOAc, 98:2); IR (neat): 3409, 2984, 2793, 1702, 1256, 1208, 699  $\text{cm}^{-1}$ ;  $^1\text{H}$  (400.13 MHz) ( $\text{CDCl}_3$ ):  $\delta$  8.24 (d,  $J = 8.3\text{ Hz}$ , 1H), 8.11 (br s, 1H), 7.25 - 7.16 (m, 3H), 7.07 (d,  $J = 8.3\text{ Hz}$ , 1H), 6.93 (d,  $J = 7.1\text{ Hz}$ , 1H), 6.14 (s, 2H), 4.16 (d,  $J = 17.2\text{ Hz}$ , 1H), 3.83 - 3.72 (m, 3H), 3.0 (d,  $J = 9.6\text{ Hz}$ , 1H), 2.36 (d,  $J = 6.0\text{ Hz}$ , 6H), 2.12 (m, 1H);  $^{13}\text{C}$  NMR (100.6 MHz) ( $\text{CDCl}_3$ ):  $\delta$  168.7 (C), 134.9 (C), 134.5 (C), 134.0 (C), 133.7 (C), 132.9 (C), 129.8 (C), 129.1 (C), 128.6 (C), 125.7 (CH), 123.5 (CH), 120.2 (CH), 120.1 (CH), 116.1 (CH), 110.4 (CH), 105.0 (CH), 101.9 (CH), 71.2 (CH), 52.6 ( $\text{CH}_2$ ), 42.4 ( $\text{CH}_2$ ), 28.6 (CH), 21.5 ( $\text{CH}_3$ ), 21.4 ( $\text{CH}_3$ ), 21.2 (CH), 20.0 ( $\text{CH}_3$ ); HRMS:  $m/z$  [ $\text{M} + \text{H}$ ] $^+$  calcd for  $\text{C}_{25}\text{H}_{28}\text{N}_3\text{O}$ : 386.2227; found: 386.2227; HRMS:  $m/z$  [ $\text{M} + \text{H}$ ] $^+$  calcd for  $\text{C}_{25}\text{H}_{28}\text{N}_3\text{O}$ : 386.2227; found: 386.2227.

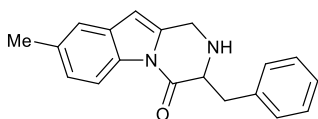

**3-benzyl-8-methyl-2,3-dihydropyrazino[1,2-*a*]indol-4(1H)-one 5e:** 44% yield (51.6 mg); brown solid mp: 123-126 °C;  $R_f = 0.20$  (*n*-hexane-EtOAc, 85:15); IR (neat): 2998, 2917, 1692, 1286, 1252, 945, 737  $\text{cm}^{-1}$ ;  $^1\text{H}$  NMR (400.13 MHz) ( $\text{CDCl}_3$ ):  $\delta$  8.24 (d,  $J = 8.3$  Hz, 1H), 7.29 - 7.18 (m, 6H), 7.08 (d,  $J = 8.3$  Hz, 1H), 6.16 (s, 1H), 4.16 (dd,  $J_1 = 15.9$ ,  $J_2 = 1.7$  Hz, 1H), 3.94 (dd,  $J_1 = 15.9$ ,  $J_2 = 1.7$  Hz, 1H), 3.83 (dd,  $J_1 = 12.8$ ,  $J_2 = 8.3$  Hz, 1H), 3.47 (dd,  $J_1 = 14.1$ ,  $J_2 = 4.0$  Hz, 1H), 3.11 (dd,  $J_1 = 14.1$ ,  $J_2 = 8.3$  Hz, 1H), 2.38 (s, 3H) 1.78 (br s, 1H);  $^{13}\text{C}$  NMR (100.6 MHz) ( $\text{CDCl}_3$ ):  $\delta$  169.0 (C), 137.6 (C), 136.7 (C), 133.9 (C), 132.9 (C), 129.9 (C), 129.6 (CH), 128.9 (CH), 127.1 (CH), 125.7 (CH), 120.3 (CH), 116.0 (CH), 103.0 (CH), 61.3 (CH), 42.0 ( $\text{CH}_2$ ), 36.4 ( $\text{CH}_2$ ), 21.6 ( $\text{CH}_3$ ); HRMS:  $m/z$  [ $\text{M} + \text{H}$ ] $^+$  calcd for  $\text{C}_{19}\text{H}_{18}\text{N}_2\text{O}$ : 291.1492; found: 291.1492.

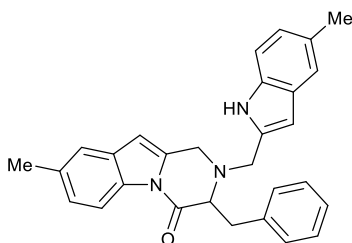

**3-benzyl-8-methyl-2-((5-methyl-1H-indol-2-yl)methyl)-2,3-dihydropyrazino[1,2-*a*]indol-4(1H)-one 8e:** 20% yield (17.1 mg); white solid; mp: 191-193 °C;  $R_f = 0.20$  (*n*-hexane-EtOAc, 90:10); IR (neat): 3389, 2992, 2801, 1686, 1260, 687  $\text{cm}^{-1}$ ;  $^1\text{H}$  NMR (400.13 MHz) ( $\text{CDCl}_3$ ):  $\delta$  8.32 (d,  $J = 8.3$  Hz, 1H), 7.43 - 7.41 (m, 3H), 7.33 (br s, 1H), 7.28 - 7.25 (m, 3H), 7.19 - 7.17 (m, 2H), 6.95 - 6.90 (m, 2H), 6.36 (s, 1H), 6.09 (s, 1H), 4.48 (dd,  $J_1 = 16.0$ ,  $J_2 = 1.4$  Hz, 1H), 3.93 - 3.87 (m, 2H), 3.78 - 3.73 (m, 2H), 3.30 (dd,  $J_1 = 14.1$  Hz,  $J_2 = 4.2$  Hz, 1H), 3.18 - 3.12 (m, 1H), 2.47 (s, 3H), 2.41 (s, 3H);  $^{13}\text{C}$  NMR (100.6 MHz) ( $\text{CDCl}_3$ ):  $\delta$  168.6 (C), 138.4 (C), 134.7 (C), 134.3 (C), 134.2 (C), 134.0 (C), 133.0 (C), 129.9 (CH), 129.5 (C), 129.4 (CH), 128.9 (C), 128.7 (CH), 128.6 (CH), 127.0 (CH), 126.0 (CH), 123.2 (CH), 120.5 (CH), 119.9 (CH), 116.1 (CH), 110.6 (CH), 105.6 (CH), 101.1 (CH), 65.5 (CH), 52.0 ( $\text{CH}_2$ ), 43.6 ( $\text{CH}_2$ ), 35.7 ( $\text{CH}_2$ ), 21.6 ( $\text{CH}_3$ ), 21.5 ( $\text{CH}_3$ ); HRMS:  $m/z$  [ $\text{M} + \text{H}$ ] $^+$  calcd for  $\text{C}_{29}\text{H}_{28}\text{N}_3\text{O}$ : 434.2227; found: 434.2225.

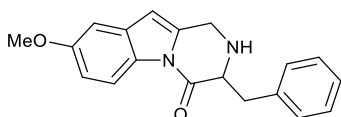

**3-benzyl-8-methoxy-2,3-dihydropyrazino[1,2-*a*]indol-4(1H)-one 5f:** 67% yield (82.9 mg); brown solid mp: 136-139 °C;  $R_f = 0.23$  (*n*-hexane-EtOAc, 85:15); IR (neat): 3002, 2900, 1683, 1297, 1266, 951, 729  $\text{cm}^{-1}$ ;  $^1\text{H}$  NMR (400.13 MHz) ( $\text{CDCl}_3$ ):  $\delta$  8.27 (d,  $J = 8.9$  Hz, 1H), 7.30 - 7.17 (m, 5H), 6.89 (d,  $J = 2.4$  Hz, 1H), 6.85 (dd,  $J_1 = 8.9$ ,  $J_2 = 2.6$  Hz, 1H), 6.14 (s, 1H), 4.12 (d,  $J = 16.0$ , 1H), 3.90 (dd,  $J_1 = 16.0$ ,  $J_2 = 1.7$  Hz, 1H), 3.82 - 3.79 (m, 1H), 3.79 (s, 3H), 3.46 (dd,  $J_1 = 14.0$ ,  $J_2 = 4.0$  Hz, 1H), 3.08 (dd,  $J_1 = 14.0$ ,  $J_2 = 8.8$  Hz, 1H), 1.78 (br s, 1H);  $^{13}\text{C}$  NMR (100.6 MHz) ( $\text{CDCl}_3$ ):  $\delta$  168.8 (C), 157.0 (C), 137.6 (C), 137.5 (C), 130.7 (C), 129.6 (C), 129.4 (CH), 128.9 (CH), 127.0 (CH), 117.0 (CH), 112.4 (CH), 103.6 (CH), 103.1 (CH), 61.2 (CH), 55.7 ( $\text{CH}_3$ ), 42.0 ( $\text{CH}_2$ ), 36.4 ( $\text{CH}_2$ ); HRMS:  $m/z$  [ $\text{M} + \text{H}$ ] $^+$  calcd for  $\text{C}_{19}\text{H}_{19}\text{N}_2\text{O}_2$ : 307.1441; found: 307.1441.

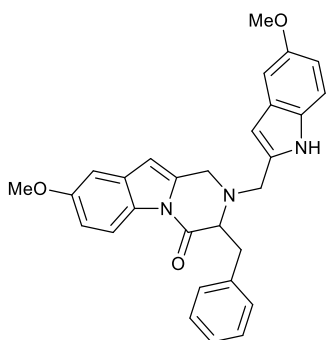

**3-benzyl-8-methoxy-2-((5-methoxy-1H-indol-2-yl)methyl)-2,3-dihydropyrazino[1,2-a]indol-4(1H)-one 8f:** 15 % yield (14.1 mg); brown solid; mp: 120-122 °C;  $R_f = 0.22$  (*n*-hexane-EtOAc, 90:10); IR (neat): 3400, 2996, 2791, 1695, 1244, 1219, 703  $\text{cm}^{-1}$ ;  $^1\text{H}$  NMR (400.13 MHz) ( $\text{CDCl}_3$ ):  $\delta$  8.34 (d,  $J = 8.9$  Hz, 1H), 7.45 - 7.39 (m, 3H), 7.28 - 7.26 (m, 3H), 7.15 (br s, 1H), 7.02 (d,  $J = 2.4$  Hz, 1H), 6.97 - 6.84 (m, 3H), 6.77 (dd,  $J_1 = 8.8$ ,  $J_2 = 2.4$  Hz, 1H), 6.36 (s, 1H), 6.11 (s, 1H), 4.50 (dd,  $J_1 = 16.8$ ,  $J_2 = 1.7$  Hz, 1H), 3.94 - 3.90 (m, 1H), 3.88 (s, 3H), 3.82 (s, 3H), 3.78 (d,  $J = 14.2$  Hz, 1H), 3.76 - 3.71 (m, 1H), 3.30 (dd,  $J = 14.2$ ,  $J_2 = 4.2$  Hz, 1H), 3.15 (dd,  $J_1 = 14.2$ ,  $J_2 = 11.5$  Hz, 1H);  $^{13}\text{C}$  NMR (100.6 MHz) ( $\text{CDCl}_3$ ):  $\delta$  168.4 (C), 157.3 (C), 154.2 (C), 138.5 (C), 135.4 (C), 134.8 (C), 131.1 (C), 130.9 (C), 129.5 (CH), 128.8 (CH), 128.7 (CH), 127.1 (CH), 117.3 (CH), 112.8 (CH), 111.9 (CH), 111.7 (CH), 105.7 (CH), 103.8 (CH), 102.1 (CH), 101.4 (CH), 65.5 (CH), 55.99 ( $\text{CH}_3$ ), 55.91 ( $\text{CH}_3$ ), 52.2 ( $\text{CH}_2$ ), 43.7 ( $\text{CH}_2$ ), 35.7 ( $\text{CH}_2$ ); HRMS:  $m/z$  [ $\text{M} + \text{H}$ ] $^+$  calcd for  $\text{C}_{29}\text{H}_{28}\text{N}_3\text{O}_3$ : 466.2125; found: 466.2125.

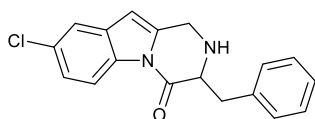

**3-benzyl-8-chloro-2,3-dihydropyrazino[1,2-a]indol-4(1H)-one 5g:** 58% yield (72.8 mg); brown solid; mp: 131-134 °C;  $R_f = 0.22$  (*n*-hexane-EtOAc, 85:15); IR (neat): 2988, 2925, 1701, 1264, 1234, 927, 728  $\text{cm}^{-1}$ ;  $^1\text{H}$  NMR (400.13 MHz) ( $\text{CDCl}_3$ ):  $\delta$  8.29 (d,  $J = 8.8$  Hz, 1H), 7.36 (d,  $J = 2.1$  Hz, 1H), 7.29 - 7.18 (m, 6H), 6.14 (s, 1H), 4.15 (d,  $J = 16.1$  Hz, 1H), 3.92 (d,  $J = 16.1$  Hz, 1H), 3.82 (dd,  $J_1 = 8.8$ ,  $J_2 = 4.0$  Hz, 1H), 3.46 (dd,  $J_1 = 14.0$ ,  $J_2 = 4.0$  Hz, 1H), 3.07 (dd,  $J_1 = 14.0$ ,  $J_2 = 8.8$  Hz, 1H), 1.83 (br s, 1H);  $^{13}\text{C}$  NMR (100.6 MHz) ( $\text{CDCl}_3$ ):  $\delta$  169.0 (C), 138.2 (C), 137.4 (C), 133.1 (C), 130.9 (C), 129.8 (C), 129.6 (CH), 128.9 (CH), 127.1 (CH), 124.5 (CH), 120.0 (CH), 117.3 (CH), 102.4 (CH), 61.3 (CH), 42.0 ( $\text{CH}_2$ ), 36.3 ( $\text{CH}_2$ ); HRMS:  $m/z$  [ $\text{M} + \text{H}$ ] $^+$  calcd for  $\text{C}_{18}\text{H}_{16}\text{ClN}_2\text{O}$ : 311.0946; found: 311.0943.

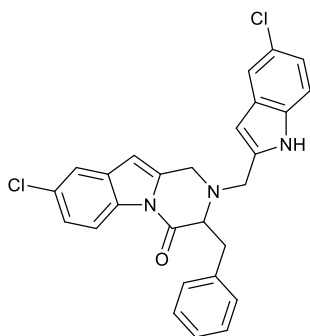

**3-benzyl-8-chloro-2-((5-chloro-1H-indol-2-yl)methyl)-2,3-dihydropyrazino[1,2-a]indol-4(1H)-one 8g:** 6% yield [yield calculated from  $^1\text{H}$  NMR analysis; the chromatographic fraction containing **1d** and **8g** was further purified by semi-preparative HPLC under normal phase condition using a Nucleodur 100-5 column (762007.100) and eluting with *n*-hexane-EtOAc, 95:5 to obtain suitable characterization data]; white solid;

mp: 131-134 °;  $R_f = 0.22$  (*n*-hexane-EtOAc, 95:5); IR (neat): 3388, 2988, 2941, 1681, 1255, 1229, 913  $\text{cm}^{-1}$ ;  $^1\text{H}$  NMR (400.13 MHz) ( $\text{CDCl}_3$ )  $\delta$  8.37 (d,  $J = 8.7$  Hz, 1H), 7.51 (d,  $J = 2.1$  Hz, 1H), 7.45 - 7.38 (m, 4H), 7.32 (dd,  $J_1 = 8.7$ ,  $J_2 = 2.0$  Hz, 1H), 7.26 - 7.23 (m, 3H), 7.05 (dd,  $J_1 = 8.7$ ,  $J_2 = 2.0$  Hz, 1H), 6.89 (d,  $J = 8.7$  Hz, 1H), 6.39 (s, 1H), 6.12 (s, 1H), 4.53 (d,  $J = 16.9$  Hz, 1H), 3.95 (d,  $J = 16.9$  Hz, 1H), 3.90 (d,  $J = 14.4$  Hz, 1H), 3.78 (d,  $J = 14.4$  Hz, 1H), 3.73 (dd,  $J_1 = 16.9$ ,  $J_2 = 1.8$  Hz, 1H), 3.30 (dd,  $J_1 = 14.1$ ,  $J_2 = 4.2$  Hz, 1H), 3.16 (dd,  $J_1 = 14.1$ ,  $J_2 = 11.6$  Hz, 1H).  $^{13}\text{C}$  NMR (100.6 MHz) ( $\text{CDCl}_3$ ): inadequate amount for the analysis. HRMS:  $m/z$   $[\text{M} + \text{H}]^+$  calcd for  $\text{C}_{27}\text{H}_{22}\text{Cl}_2\text{N}_3\text{O}$ : 474.1134; found: 474.1134.

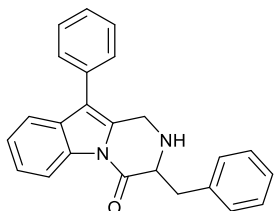

**3-benzyl-10-phenyl-2,3-dihydropyrazino[1,2-*a*]indol-4(1H)-one 5h:** 68% yield (101.0 mg); brown oil;  $R_f = 0.22$  (*n*-hexane-EtOAc, 80:20); IR (neat): 3025, 2972, 1702, 1250, 1236, 939, 730  $\text{cm}^{-1}$ ;  $^1\text{H}$  NMR (400.13 MHz) ( $\text{CDCl}_3$ ):  $\delta$  8.49 (d,  $J = 8.0$  Hz, 1H), 7.56 (d,  $J = 7.7$  Hz, 1H), 7.57 - 7.17 (m, 12H), 4.25 (d,  $J = 16.9$  Hz, 1H), 4.04 (d,  $J = 16.9$  Hz, 1H), 4.00 (dd,  $J_1 = 12.7$ ,  $J_2 = 4.0$  Hz, 1H), 3.48 (dd,  $J_1 = 13.9$ ,  $J_2 = 4.0$  Hz, 1H), 3.14 (dd,  $J_1 = 13.9$ ,  $J_2 = 8.7$  Hz, 1H), 1.78 (br s, 1H);  $^{13}\text{C}$  NMR (100.6 MHz) ( $\text{CDCl}_3$ ):  $\delta$  169.3 (C), 137.5 (C), 134.8 (C), 132.7 (C), 132.6 (C), 129.7 (CH), 129.3 (C), 129.1 (CH), 128.9 (CH), 127.5 (CH), 127.1 (CH), 125.1 (CH), 124.5 (CH), 119.3 (CH), 117.6 (CH), 116.6 (CH), 61.5 (CH), 41.3 ( $\text{CH}_2$ ), 36.4 ( $\text{CH}_2$ ). HRMS:  $m/z$   $[\text{M} + \text{H}]^+$  calcd for  $\text{C}_{24}\text{H}_{21}\text{N}_2\text{O}$ : 353.1648; found: 353.1647.

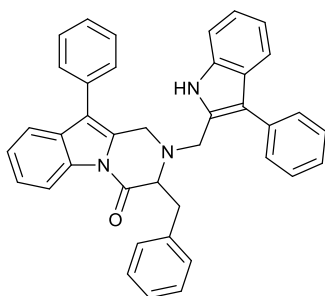

**3-benzyl-10-phenyl-2-((3-phenyl-1H-indol-2-yl)methyl)-2,3-dihydropyrazino[1,2-*a*]indol-4(1H)-one 8h:** 8% yield (9.0 mg); yellow solid; mp: 131-134 °C;  $R_f = 0.20$  (*n*-hexane-EtOAc, 85:15); IR (neat): 3356, 2998, 1697, 1258, 1248, 923  $\text{cm}^{-1}$ ;  $^1\text{H}$  NMR (400.13 MHz) ( $\text{CDCl}_3$ ):  $\delta$  8.54 (d,  $J = 8.0$  Hz, 1H), 7.63 (d,  $J = 7.7$  Hz, 1H), 7.57 - 7.27 (m, 16H), 7.19 - 7.11 (m, 4H), 7.04 (t,  $J = 1.1$  Hz, 1H), 6.99 (d,  $J = 8.0$  Hz, 1H), 4.59 (d,  $J = 17.0$  Hz, 1H), 4.07 - 3.99 (m, 2H), 3.92 - 3.85 (m, 2H), 3.41 (dd,  $J_1 = 14.1$ ,  $J_2 = 4.3$  Hz, 1H), 3.24 (dd,  $J_1 = 14.1$ ,  $J_2 = 11.8$  Hz, 1H);  $^{13}\text{C}$  NMR (100.6 MHz) ( $\text{CDCl}_3$ ):  $\delta$  168.8 (C), 161.6 (C), 138.5 (C), 135.1 (C), 134.9 (C), 134.3 (C), 131.0 (C), 129.63 (C), 129.56 (CH), 129.44 (CH), 129.41 (C), 129.13 (CH), 129.08 (CH), 129.00 (CH), 128.7 (CH), 127.8 (C), 127.7 (CH), 127.2 (CH), 126.2 (CH), 125.4 (CH), 124.7 (CH), 122.1 (CH), 120.5 (C), 119.9 (CH), 119.5 (CH), 119.2 (CH), 116.7 (CH), 116.0 (C), 111.0 (CH), 66.6 (CH), 50.8 ( $\text{CH}_2$ ), 42.4 ( $\text{CH}_2$ ), 35.9 ( $\text{CH}_2$ ). HRMS:  $m/z$   $[\text{M} + \text{H}]^+$  calcd for  $\text{C}_{39}\text{H}_{32}\text{N}_3\text{O}$ : 558.2540; found: 558.2540.

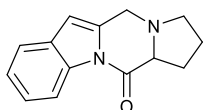

**1,2,3,12a-tetrahydro-5H,12H-pyrrolo[1',2':4,5]pyrazino[1,2-*a*]indol-12-one 11a:** 76 % yield (69.0 mg); yellow solid; mp: 130-132 °C;  $R_f = 0.20$  (*n*-hexane-EtOAc, 85:15); IR (neat): 2986, 1704, 1238, 1110, 940  $\text{cm}^{-1}$ ;  $^1\text{H}$  NMR (400.13 MHz) ( $\text{CDCl}_3$ ):  $\delta$  8.44 (d,  $J = 8.0$  Hz, 1H), 7.51 (d,  $J = 7.5$  Hz, 1H), 7.35 - 7.26 (m, 2H), 6.39 (s, 1H), 4.31 (d,  $J = 15.2$  Hz, 1H), 3.88 (d,  $J = 15.2$  Hz, 1H), 3.47 (t,  $J = 7.4$  Hz, 1H), 3.02 (q,  $J = 6.6$  Hz, 1H), 2.67 (q,  $J = 8.1$  Hz, 1H), 2.35 - 2.30 (m, 2H), 1.97 - 1.89 (m, 2H);  $^{13}\text{C}$  NMR (100.6 MHz) ( $\text{CDCl}_3$ ):  $\delta$  169.7 (C), 135.8 (C), 134.6 (C), 129.9 (C), 124.5 (CH), 124.1 (CH), 120.2 (CH), 116.2 (CH), 104.6 (CH), 65.7 (CH), 52.6 ( $\text{CH}_2$ ), 47.7 ( $\text{CH}_2$ ), 26.3 ( $\text{CH}_2$ ), 22.3 ( $\text{CH}_2$ ). HRMS:  $m/z$  [ $\text{M} + \text{H}$ ] $^+$  calcd for  $\text{C}_{14}\text{H}_{15}\text{N}_2\text{O}$ : 227.1179; found: 227.1180.

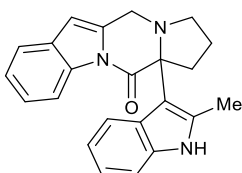

**12a-(2-methyl-1H-indol-3-yl)-1,2,3,12a-tetrahydro-5H,12H-pyrrolo[1',2':4,5]pyrazino[1,2-*a*]indol-12-one 12a:** 8% yield (5.6 mg); yellow solid; mp: 141-139 °C;  $R_f = 0.20$  (*n*-hexane-EtOAc, 90:10); IR (neat): 3397, 3026, 1687, 1245, 933  $\text{cm}^{-1}$ ;  $^1\text{H}$  NMR (400.13 MHz) ( $\text{CDCl}_3$ ):  $\delta$  8.56 (d,  $J = 7.9$  Hz, 1H), 7.96 (d,  $J = 7.5$  Hz, 1H), 7.72 (br s, 1H), 7.48 (d,  $J = 7.5$  Hz, 1H), 7.36 - 7.23 (m, 3H), 7.14 - 7.03 (m, 2H), 6.26 (s, 1H), 4.12 (dd,  $J_1 = 14.0$ ,  $J_2 = 1.2$  Hz, 1H), 3.96 (d,  $J = 17.1$  Hz, 1H), 3.30 (td,  $J = 9.0$ , 2.8 Hz, 1H), 3.09 - 3.02 (m, 1H), 2.81 (q,  $J = 9.0$  Hz, 1H), 2.61 - 2.52 (m, 1H), 2.21 (s, 3H), 2.20 - 2.08 (m, 1H), 1.94 - 1.86 (m, 1H);  $^{13}\text{C}$  NMR (100.6 MHz) ( $\text{CDCl}_3$ ):  $\delta$  172.4(C), 136.6 (C), 135.0 (C), 132.7 (C), 130.1 (C), 128.0 (C), 124.3 (CH), 124.1 (CH), 121.5 (CH), 120.9 (CH), 120.1 (CH), 119.5 (CH), 116.5 (CH), 110.3 (CH), 107.8 (C), 104.8 (CH), 71.3 (C), 49.8 ( $\text{CH}_2$ ), 41.8 ( $\text{CH}_2$ ), 34.7 ( $\text{CH}_2$ ), 21.8 ( $\text{CH}_2$ ), 13.3 ( $\text{CH}_3$ ). HRMS:  $m/z$  [ $\text{M} + \text{H}$ ] $^+$  calcd for  $\text{C}_{23}\text{H}_{22}\text{N}_3\text{O}$ : 356.1757; found: 356.1757.

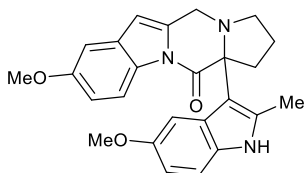

**8-methoxy-12a-(5-methoxy-2-methyl-1H-indol-3-yl)-1,2,3,12a-tetrahydro-5H,12H-pyrrolo[1',2':4,5]pyrazino[1,2-*a*]indol-12-one 12b:** 39 % yield (32.8 mg); yellow oil;  $R_f = 0.20$  (*n*-hexane-EtOAc, 90:10); IR (neat): 3356, 2998, 1696, 1233, 1222, 799  $\text{cm}^{-1}$ ;  $^1\text{H}$  NMR (400.13 MHz) ( $\text{DMSO}-d_6$ )  $\delta$  10.81 (br s, 1H), 8.33 (d,  $J = 8.9$  Hz, 1H), 7.14 (d,  $J = 8.7$  Hz, 1H), 7.08 (s, 2H), 6.93 (dd,  $J_1 = 8.9$ ,  $J_2 = 2.6$  Hz, 1H), 6.64 (dd,  $J_1 = 8.9$ ,  $J_2 = 2.6$  Hz, 1H), 6.35 (s, 1H), 4.04 (d,  $J = 17.2$  Hz, 1H), 3.95 - 3.84 (m, 1H), 3.79 (s, 3H), 3.74 (m, 1H), 3.59 (s, 3H), 3.26 (t,  $J = 2.4$  Hz, 1H), 2.96 - 2.85 (m, 1H), 2.50 (s, 3H), 2.44 - 2.32 (m, 1H), 2.14 - 1.97 (m, 1H), 1.91 - 1.71 (m, 1H);  $^{13}\text{C}$  NMR (100.6 MHz) ( $\text{DMSO}-d_6$ )  $\delta$  171.5 (C), 156.5 (C), 152.7 (C), 136.9 (C), 134.1 (C), 130.9 (C), 130.0 (C), 128.6 (C), 127.4 (C), 116.3 (CH), 111.9 (CH), 111.0 (CH), 109.5 (CH), 105.2 (CH), 104.5 (CH), 103.6 (CH), 70.3 (C), 55.3 ( $\text{CH}_3$ ), 55.1 ( $\text{CH}_3$ ), 49.2 ( $\text{CH}_2$ ), 40.8 ( $\text{CH}_2$ ), 33.9 ( $\text{CH}_2$ ), 21.2 ( $\text{CH}_2$ ), 12.6 ( $\text{CH}_3$ ). HRMS:  $m/z$  [ $\text{M} + \text{H}$ ] $^+$  calcd for  $\text{C}_{25}\text{H}_{26}\text{N}_3\text{O}_3$ : 416.1969; found: 416.1970.

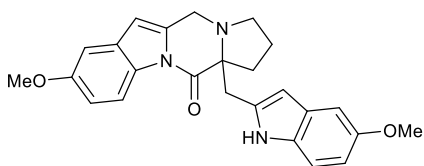

**8-methoxy-12a-((5-methoxy-1H-indol-2-yl)methyl)-1,2,3,12a-tetrahydro-5H,12H-**

**pyrrolo[1',2':4,5]pyrazino[1,2-*a*]indol-12-one 13b** 12 % yield (10.0 mg); brown solid; mp: 133-135 °C;  $R_f$  = 0.20 (*n*-hexane-EtOAc, 85:15); IR (neat): 3339, 2987, 1709, 1238, 940, 726  $\text{cm}^{-1}$ ;  $^1\text{H}$  NMR (400.13 MHz) ( $\text{CDCl}_3$ ):  $\delta$  9.21 (br s, 1H), 8.25 (d,  $J$  = 8.9 Hz, 1H), 7.17 - 7.14 (m, 2H), 6.95 - 6.91 (m, 2H), 6.86 (dd,  $J_1$  = 8.9,  $J_2$  = 2.4 Hz, 1H), 6.73 (dd,  $J_1$  = 8.9,  $J_2$  = 2.4 Hz, 1H), 6.29 (s, 1H), 6.23 (s, 1H), 4.40 (d,  $J$  = 17.0, 1H), 4.13 (d,  $J$  = 17.0 Hz, 1H), 3.79 (s, 3H), 3.77 (s, 3H), 3.35 (d,  $J$  = 15.4 Hz, 1H), 3.21 (d,  $J$  = 15.4 Hz, 1H), 3.17 - 3.07 (m, 1H), 2.71 (q,  $J$  = 8.9 Hz, 1H), 2.47 - 2.35 (m, 1H), 1.94 - 1.82 (m, 1H) 1.20 - 1.17 (m, 1H);  $^{13}\text{C}$  NMR (100.6 MHz) ( $\text{CDCl}_3$ ):  $\delta$  172.2 (C), 157.1 (C), 154.1 (C), 135.8 (C), 135.0 (C), 131.4 (C), 130.8 (C), 129.5 (C), 128.7 (C), 117.1 (CH), 112.5 (CH), 111.4 (CH), 111.3 (CH), 105.8 (CH), 103.6 (CH), 102.9 (CH), 102.0 (CH), 70.4 (C), 55.9 ( $\text{CH}_3$ ), 55.7 ( $\text{CH}_3$ ), 52.1 ( $\text{CH}_2$ ), 41.7 ( $\text{CH}_2$ ), 33.2 ( $\text{CH}_2$ ), 31.8 ( $\text{CH}_2$ ), 21.7 ( $\text{CH}_2$ ). HRMS:  $m/z$  [ $\text{M} + \text{H}$ ] $^+$  calcd for  $\text{C}_{25}\text{H}_{26}\text{N}_3\text{O}_3$ : 416.1969; found: 416.1968.

**5.2. Characterization data of 2-benzyl-3-substituted 2,3-dihydropyrazino[1,2-*a*]indol-4(1H)-ones 10**

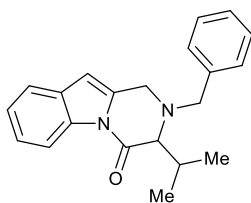

**2-benzyl-3-isopropyl-2,3-dihydropyrazino[1,2-*a*]indol-4(1H)-one 10b**: 71 % yield (66.0mg); dark yellow oil;  $R_f$  = 0.22 (*n*-hexane-EtOAc, 95:5); IR (neat): 2965, 1699, 1459, 1348, 1326, 719  $\text{cm}^{-1}$ ;  $^1\text{H}$  NMR (400.13 MHz) ( $\text{CDCl}_3$ ):  $\delta$  8.43 (d,  $J$  = 8.1 Hz, 1H), 7.46 (d,  $J$  = 6.7 Hz, 1H), 7.31 - 7.21 (m, 7H), 6.26 (s, 1H), 4.21 (dd,  $J_1$  = 17.3,  $J_2$  = 1.9 Hz, 1H), 3.77 (d,  $J$  = 17.3 Hz, 1H), 3.72 (d,  $J$  = 13.3 Hz, 1H), 3.67 (d,  $J$  = 13.3 Hz, 1H), 3.02 (d,  $J$  = 9.0 Hz, 1H), 2.14 (m, 1H), 1.16 (d,  $J$  = 6.6 Hz, 3H), 1.07 (d,  $J$  = 6.6 Hz, 3H);  $^{13}\text{C}$  NMR (100.6 MHz) ( $\text{CDCl}_3$ ):  $\delta$  169.7 (C), 138.2 (C), 135.0 (C), 134.9 (C), 129.7 (C), 129.0 (CH), 128.6 (CH), 127.6 (CH), 124.5 (CH), 124.1 (CH), 120.2 (CH), 116.6 (CH), 104.9 (CH), 71.6 (CH), 59.2 ( $\text{CH}_2$ ), 42.3 ( $\text{CH}_2$ ), 28.7 (CH), 21.2 ( $\text{CH}_3$ ), 20.2 ( $\text{CH}_3$ ); HRMS:  $m/z$  [ $\text{M} + \text{H}$ ] $^+$  calcd for  $\text{C}_{25}\text{H}_{23}\text{N}_2\text{O}$ : 319.1805; found: 319.1804.

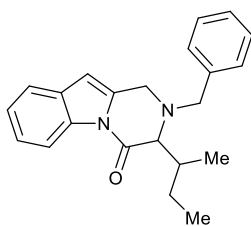

**2-benzyl-3-(sec-butyl)-2,3-dihydropyrazino[1,2-*a*]indol-4(1H)-one 10c**: 67 % yield (64.5 mg); dark yellow oil;  $R_f$  = 0.21 (*n*-hexane-EtOAc, 95:5); IR (neat): 2955, 1679, 1450, 1340, 1310, 739  $\text{cm}^{-1}$ ;  $^1\text{H}$  NMR (400.13 MHz) ( $\text{CDCl}_3$ ):  $\delta$  8.46 (d,  $J$  = 8.1 Hz, 1H), 7.50 (d,  $J$  = 6.8 Hz, 1H), 7.34 - 7.23 (m, 7H), 6.29 (s, 1H), 4.24 (dd,  $J_1$  = 17.3 Hz,  $J_2$  = 1.5 Hz, 1H), 3.80 (d,  $J$  = 17.3 Hz, 1H), 3.73 (s, 2H), 3.18 (d,  $J$  = 11.1 Hz, 1H), 2.07 - 1.97 (m, 1H), 1.95 - 1.85 (m, 1H), 1.46 - 1.35 (m, 1H), 1.06 (d,  $J$  = 6.7 Hz, 3H), 0.91 (t,  $J$  = 7.4 Hz, 3H);  $^{13}\text{C}$  NMR (100.6 MHz) ( $\text{CDCl}_3$ ):  $\delta$  170.0 (C), 138.1 (C), 134.9 (C), 129.8 (C), 129.1 (C), 128.6 overlapping (CH), 127.7 (CH), 124.5 (CH), 124.1 (CH), 120.2 (CH), 116.7 (CH), 105.0 (CH), 77.5 (CH), 77.2 (CH), 76.8 (CH), 69.9 (CH), 59.3 ( $\text{CH}_2$ ), 42.3 ( $\text{CH}_2$ ), 34.3 (CH), 26.6 ( $\text{CH}_2$ ), 16.2 ( $\text{CH}_3$ ), 10.4 ( $\text{CH}_3$ ); HRMS:  $m/z$  [ $\text{M} + \text{H}$ ] $^+$  calcd for  $\text{C}_{22}\text{H}_{25}\text{N}_2\text{O}$ : 333.1961; found: 333.1961.

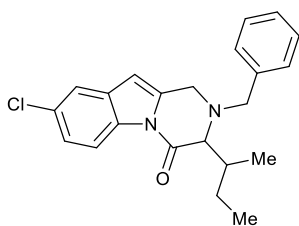

**2-benzyl-3-(sec-butyl)-8-chloro-2,3-dihydropyrazino[1,2-a]indol-4(1H)-one 10d:** 54 % yield (57.3 mg); pale orange oil;  $R_f = 0.22$  (*n*-hexane-EtOAc, 99:1); IR (neat): 2922, 1702, 1447, 1342, 733, 698  $\text{cm}^{-1}$ ;  $^1\text{H}$  NMR (400.13 MHz) ( $\text{CDCl}_3$ ):  $\delta$  8.37 (d,  $J = 8.7$  Hz, 1H), 7.46 (d,  $J = 2.1$  Hz, 1H), 7.35 - 7.24 (m, 6H), 6.24 (s, 1H), 4.22 (dd,  $J_1 = 17.4$ ,  $J_2 = 1.9$  Hz, 1H), 3.79 (d,  $J = 17.4$  Hz, 1H), 3.72 (s, 2H), 3.18 (d,  $J = 10.0$  Hz, 1H), 2.07 - 1.97 (m, 1H), 1.95 - 1.85 (m, 1H), 1.46 - 1.35 (m, 1H), 1.06 (d,  $J = 6.7$  Hz, 3H), 0.92 (t,  $J = 7.4$  Hz, 3H);  $^{13}\text{C}$  NMR (100.6 MHz) ( $\text{CDCl}_3$ ):  $\delta$  169.8 (C), 137.9 (-C), 136.5 (C), 133.2 (C), 131.1 (C), 129.7 (C), 129.0 (CH), 128.6 (CH), 127.7 (CH), 124.5 (CH), 119.9 (CH), 117.5 (CH), 104.2 (CH), 69.7 (CH), 59.4 ( $\text{CH}_2$ ), 42.3 ( $\text{CH}_2$ ), 34.2 (CH), 26.6 ( $\text{CH}_2$ ), 16.1 ( $\text{CH}_3$ ), 10.4 ( $\text{CH}_3$ ); HRMS:  $m/z$  [ $\text{M} + \text{H}$ ] $^+$  calcd for  $\text{C}_{22}\text{H}_{24}\text{ClN}_2\text{O}$ : 367.1572; found: 367.1571.

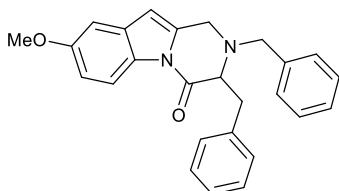

**2,3-dibenzyl-8-methoxy-2,3-dihydropyrazino[1,2-a]indol-4(1H)-one 10e:** 68% yield (78.1 mg); orange solid; mp: 116-118  $^\circ\text{C}$ ;  $R_f = 0.22$  (*n*-hexane-EtOAc, 96:4); IR (neat): 3020, 2810, 1682, 1373, 1163, 695  $\text{cm}^{-1}$ ;  $^1\text{H}$  NMR (400.13 MHz) ( $\text{CDCl}_3$ ):  $\delta$  8.35 (d,  $J = 8.8$  Hz, 1H), 7.36 - 7.18 (m, 8H), 7.00 - 6.93 (m, 4H), 6.29 (s, 1H), 4.33 (dd,  $J_1 = 16.9$ ,  $J_2 = 1.1$  Hz, 1H), 3.88 (s, 3H), 3.86 (d,  $J = 5.3$  Hz, 1H), 3.83 (d,  $J = 5.3$  Hz, 1H), 3.77 (d,  $J = 13.3$  Hz, 1H), 3.61 (d,  $J = 13.3$  Hz, 1H), 3.29 (dd,  $J_1 = 14.4$ ,  $J_2 = 4.8$  Hz, 1H), 3.20 (dd,  $J_1 = 14.4$ ,  $J_2 = 10.0$  Hz, 1H);  $^{13}\text{C}$  NMR (100.6 MHz) ( $\text{CDCl}_3$ ):  $\delta$  169.0 (C), 157.1 (C), 138.3 (C), 137.6 (C), 135.4 (C), 130.9 (C), 129.5 (C), 129.4 (CH), 128.8 overlapping (CH), 128.4 (CH), 127.5 (CH), 126.7 (CH), 117.2 (CH), 112.5 (CH), 105.3 (CH), 103.7 (CH), 66.3 (CH), 58.2 ( $\text{CH}_2$ ), 55.8 ( $\text{CH}_3$ ), 43.0 ( $\text{CH}_2$ ), 35.5 ( $\text{CH}_2$ ); HRMS:  $m/z$  [ $\text{M} + \text{H}$ ] $^+$  calcd for  $\text{C}_{26}\text{H}_{25}\text{N}_2\text{O}_2$ : 397.1910; found: 397.1910.

## 6. HPLC DATA AND CHROMATOGRAMS: EFFECT OF REACTION TEMPERATURE IN ENANTIOMERIC EXCESS

Enantiomeric ratios were determined on JASCO HPLC system equipped with a UV/CD detector. Chiralpak IA column (250x4.6 mm L.xl.D. 5 $\mu\text{m}$ ), *n*-hexane/DCM 80/20 + 1% MeOH, 1 mL/min, UV detection at 254 nm (product **5f**) or 280 nm (product **8f**), room temperature. Analytical conditions have been optimized on racemic version of product **5f** ( $k_1 = 1.43$ ,  $K_2 = 2.78$ ,  $\alpha = 1.94$ ) and **8f** ( $k_1 = 1.97$ ,  $K_2 = 2.33$ ,  $\alpha = 1.18$ ).

**Chromatogram of product 5f obtained using the reaction conditions reported in Table 5, at 120  $^\circ\text{C}$**  (entry 1, see article).

Area ratio of enantiomers was 68:32



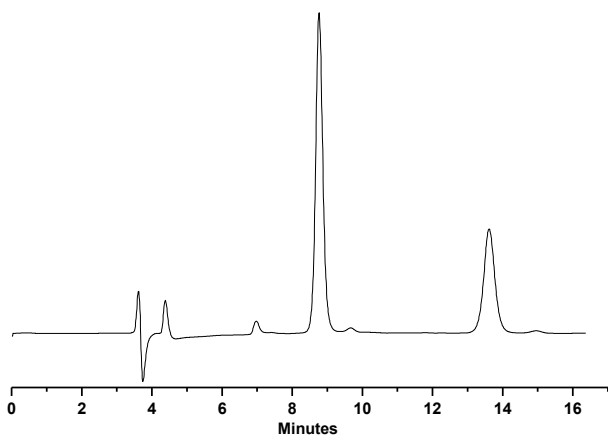

**Chromatogram of product 8f obtained using the reaction conditions reported in Table 5, at 120 °C (entry 1, see article).**

Area ratio of enantiomers was 46:54

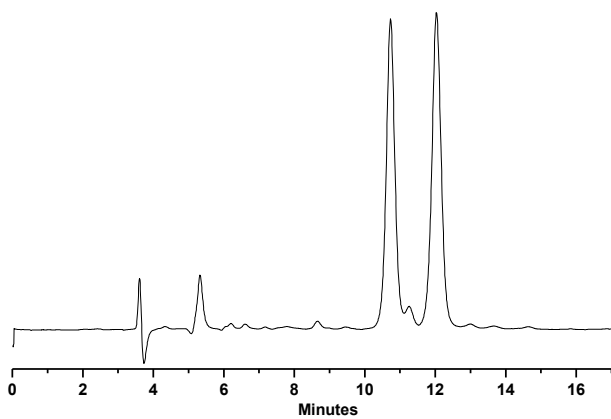

**Chromatogram of product 5f obtained using the reaction conditions reported in Table 5, at 90 °C (entry 2, see article).**

Area ratio of enantiomers was 85:15

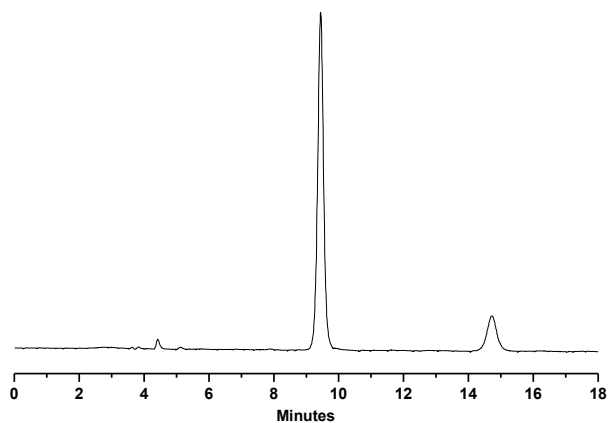

**Chromatogram of product 5f obtained using the reaction conditions reported in Table 5, at 70 °C (entry 3, see article).**  
Area ratio of enantiomers was 92:8

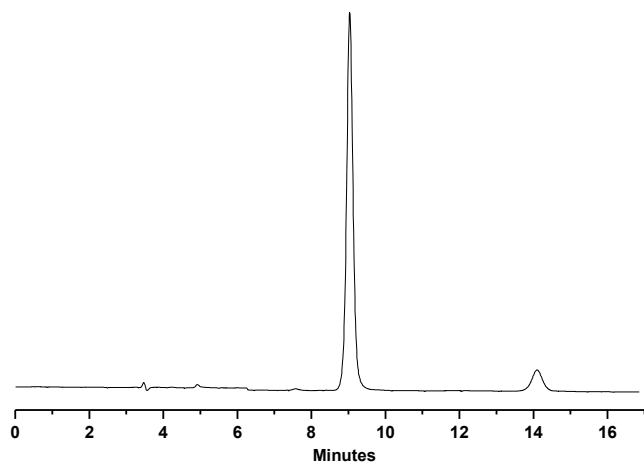

**Chromatogram of product 5f obtained using the reaction conditions reported in Table 5, at 70 °C (entry 4, see article).**  
Area ratio of enantiomers was 95:5

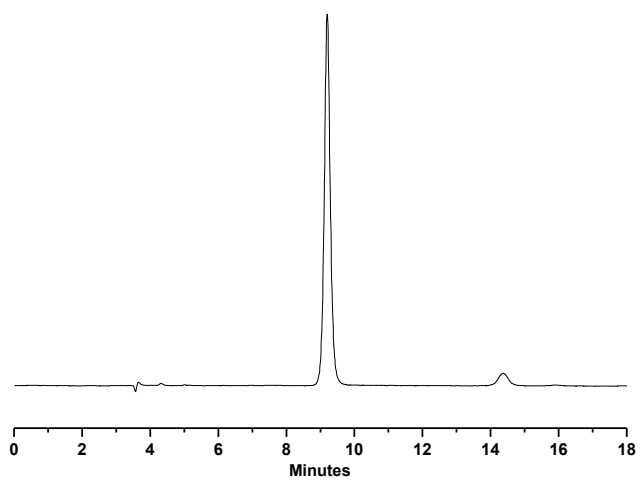

## 7. REFERENCES

- [1] a. A. Arcadi, G. Berden, A Ciogli, D. Corinti, M. E Crestoni, M. De Angelis, G. Fabrizi, A Goggiamani, A. Iazzetti, F. Marrone, V. Marsicano, J. Oomens, A. Serraiocco, *EurJoc* 2022 doi: 10.1002/ejoc.202201166; b. A. Iazzetti, A. Arcadi, S. Dessalvi, G. Fabrizi, A. Goggiamani, F. Marrone, A. Serraiocco, A. Sferrazza, K. Ullah *Catalysts* 2022, **12**, 1516.
- [2] A. Arcadi, A. Calcaterra, M. Chiarini, G. Fabrizi, A. Fochetti, A. Goggiamani, A. Iazzetti, F. Marrone, V. Marsicano, A. Serraiocco, *Synthesis* 2022, **54**, 741.
- [3] S. Hammoud, E. Anselmi, K. Cherry, J.-C. Kizirian, J. Thibonnet, *Eur. J. Org. Chem.* 2018, **45**, 6314-6327.
- [4] Y. Goriya, C. V. Ramana, *Chem. Comm.* 2014, **50**, 7790.
- [5] V. Veeraswamy, G. Goswami, S. Mukherjee, K. Ghosh, M. Lal Saha, A. Sengupta, and M. K. Ghorai, *J. Org. Chem.* 2018, **83**, 1106.
- [6] A. Jing, C. Ning-jie, S. Li-Dong, J. Yu-Qin, M. Ying, C. Jia-Rong, X. Wen-Jing, *Chem Comm.* 2011, **47**, 1869.
- [7] S. F. P. Braga, L. C. Martins, E. B. da Silva, P. A. Sales Júnior, S. M. F. Murta, A. J. Romanha, W. T. Soh, H. Brandstetter, R. S. Ferreira, R. B. de Oliveira, *Bioorg. & Med. Chem.* 2017, **25**, 1889-1900.
- [8] C.J. Trabbic, J.H. Overmeyer, E.M. Alexander, E.J. Crismann, H.M. Kvale, M.A. Smith, P.W. Erhardt, W.A. Maltese, *J. Med. Chem.* 2015, **58**, 2489.

# 8. COPIES OF NMR SPECTRA

$^1\text{H}$  NMR-spectrum (400.13 MHz) ( $\text{DMSO-}d_6$ )

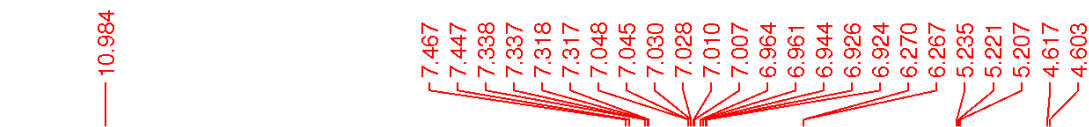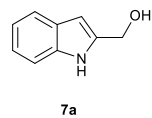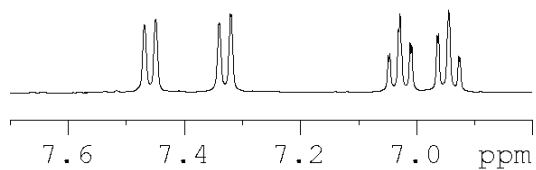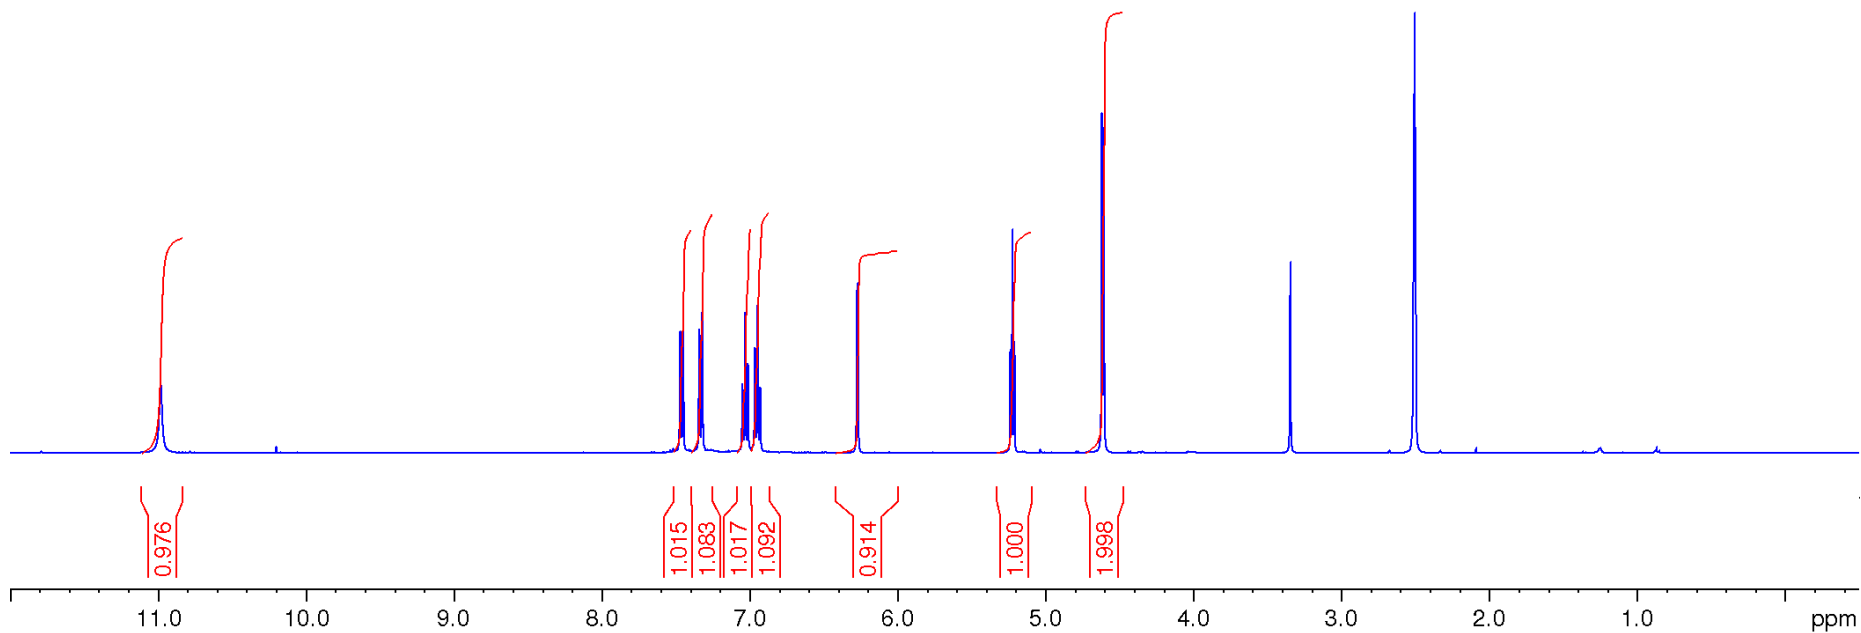

$^{13}\text{C}$  NMR-spectrum (100.6 MHz) ( $\text{DMSO-}d_6$ )

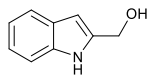

7a

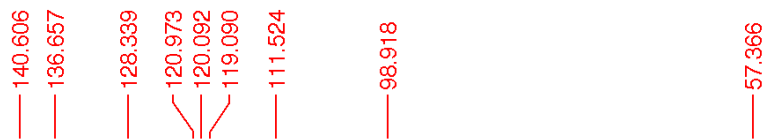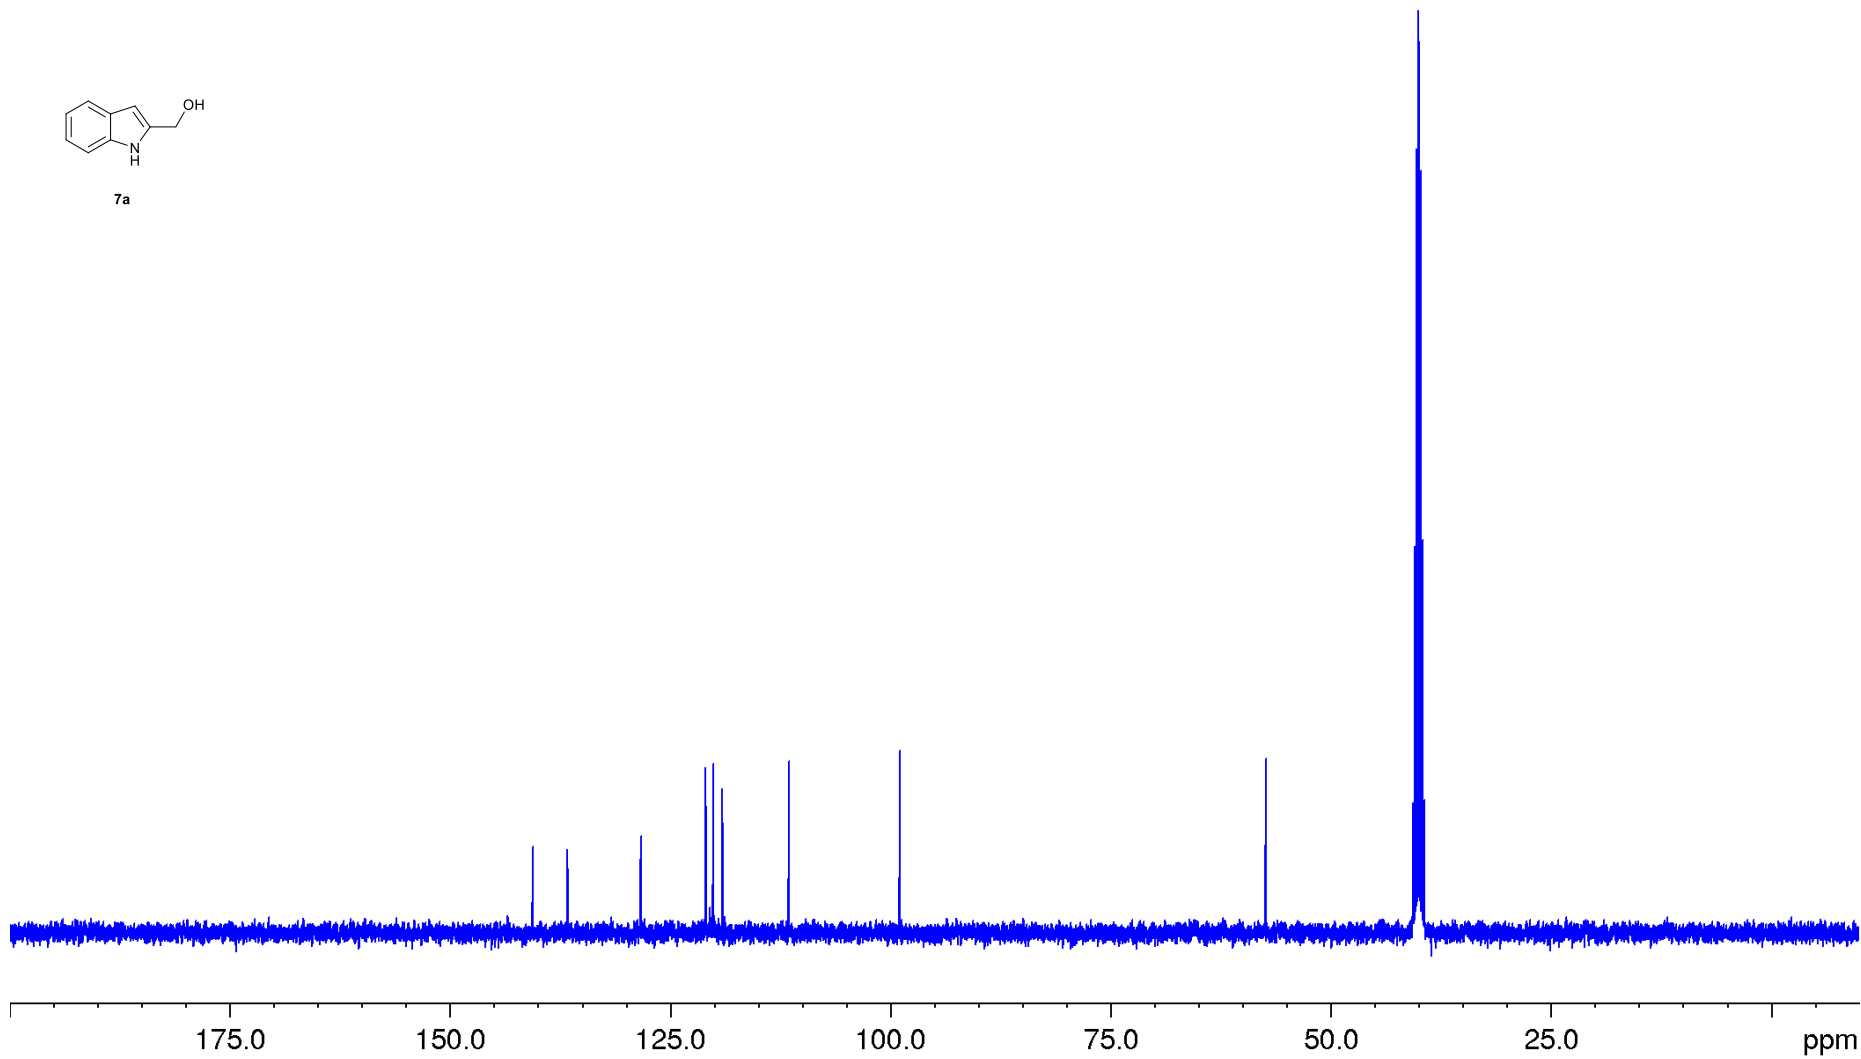

# DEPT 135 NMR-spectrum (DMSO- $d_6$ )

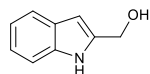

7a

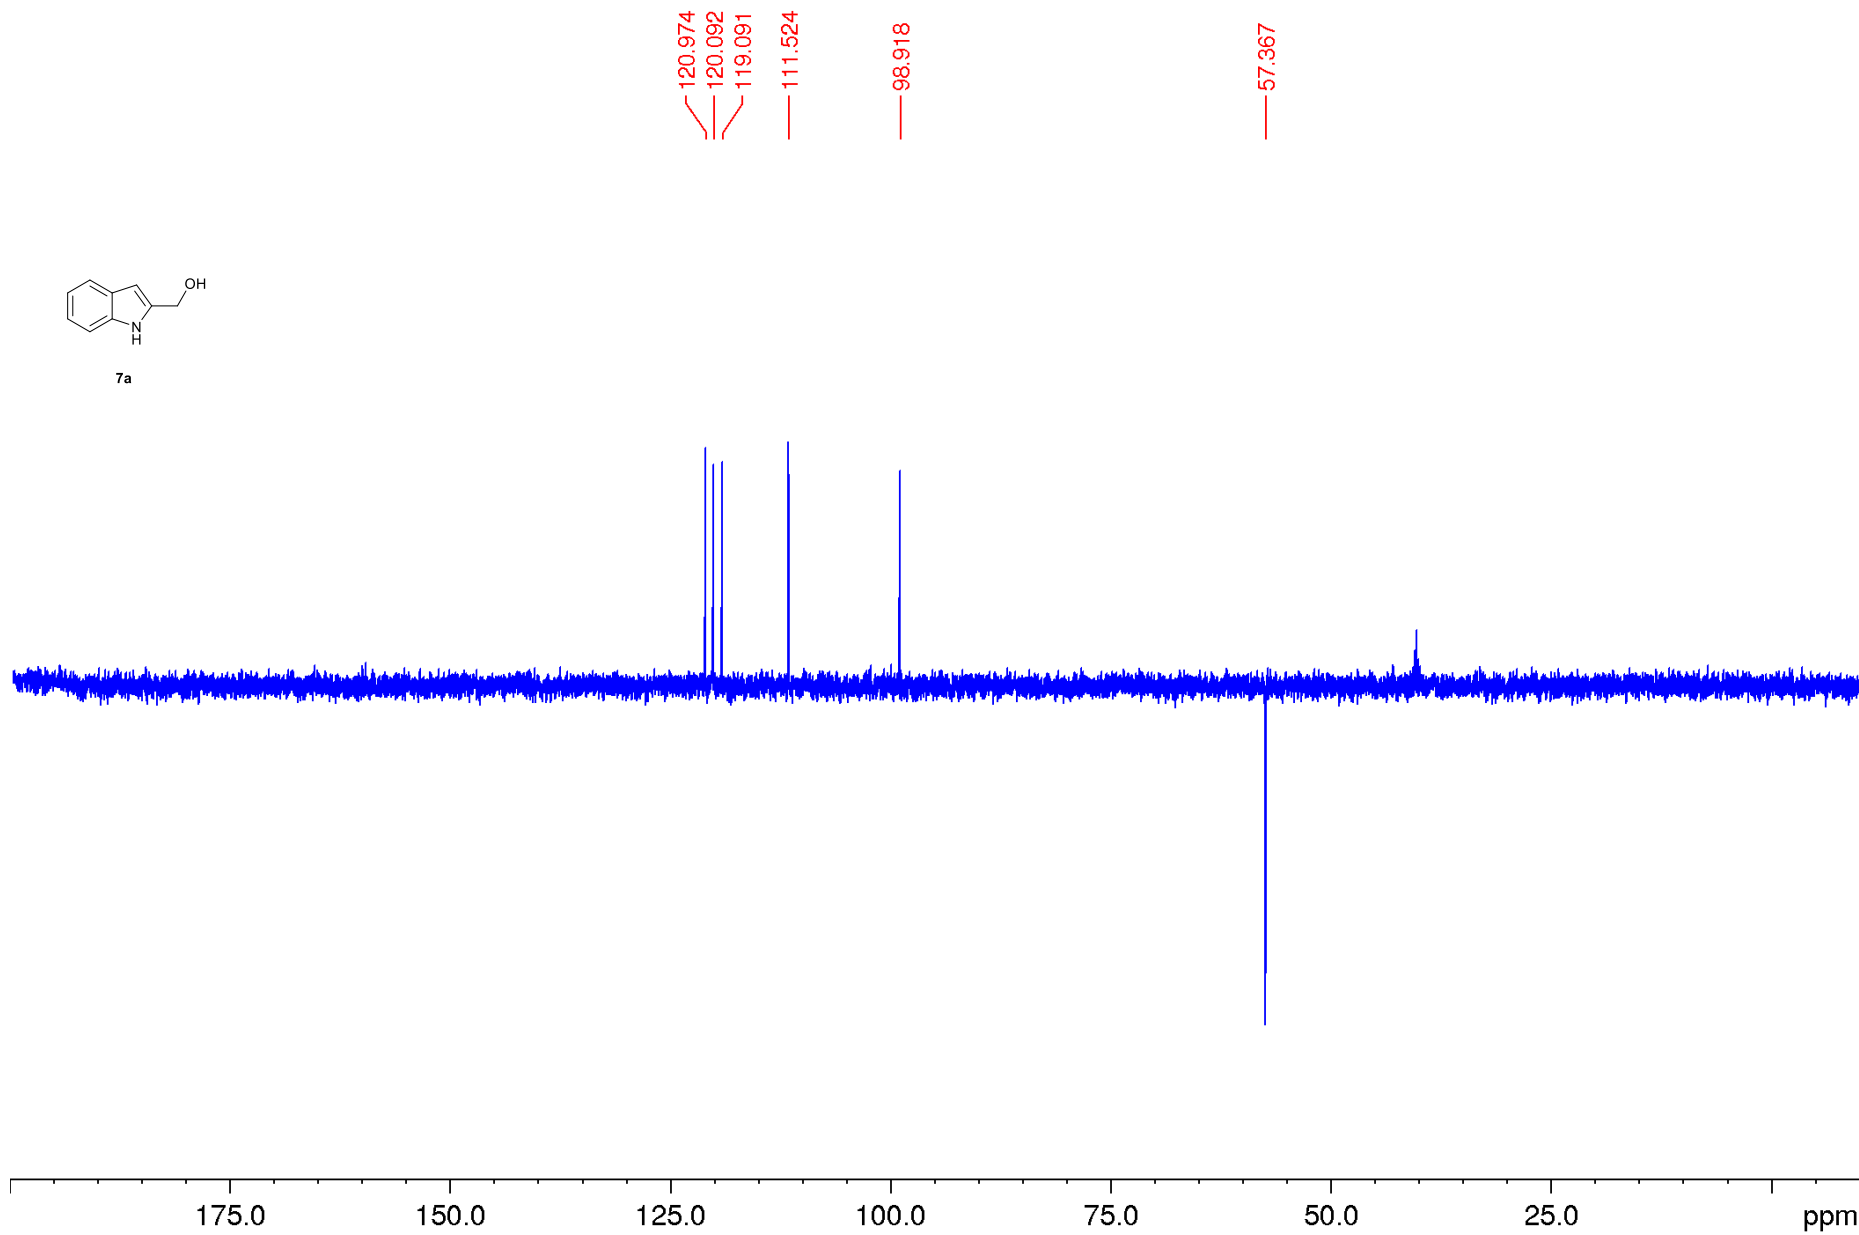

<sup>1</sup>H NMR-spectrum (400.13 MHz) (CDCl<sub>3</sub>)

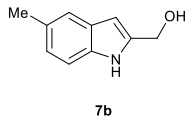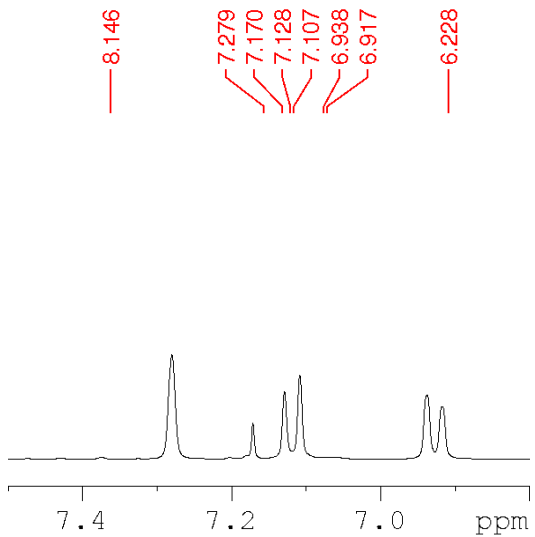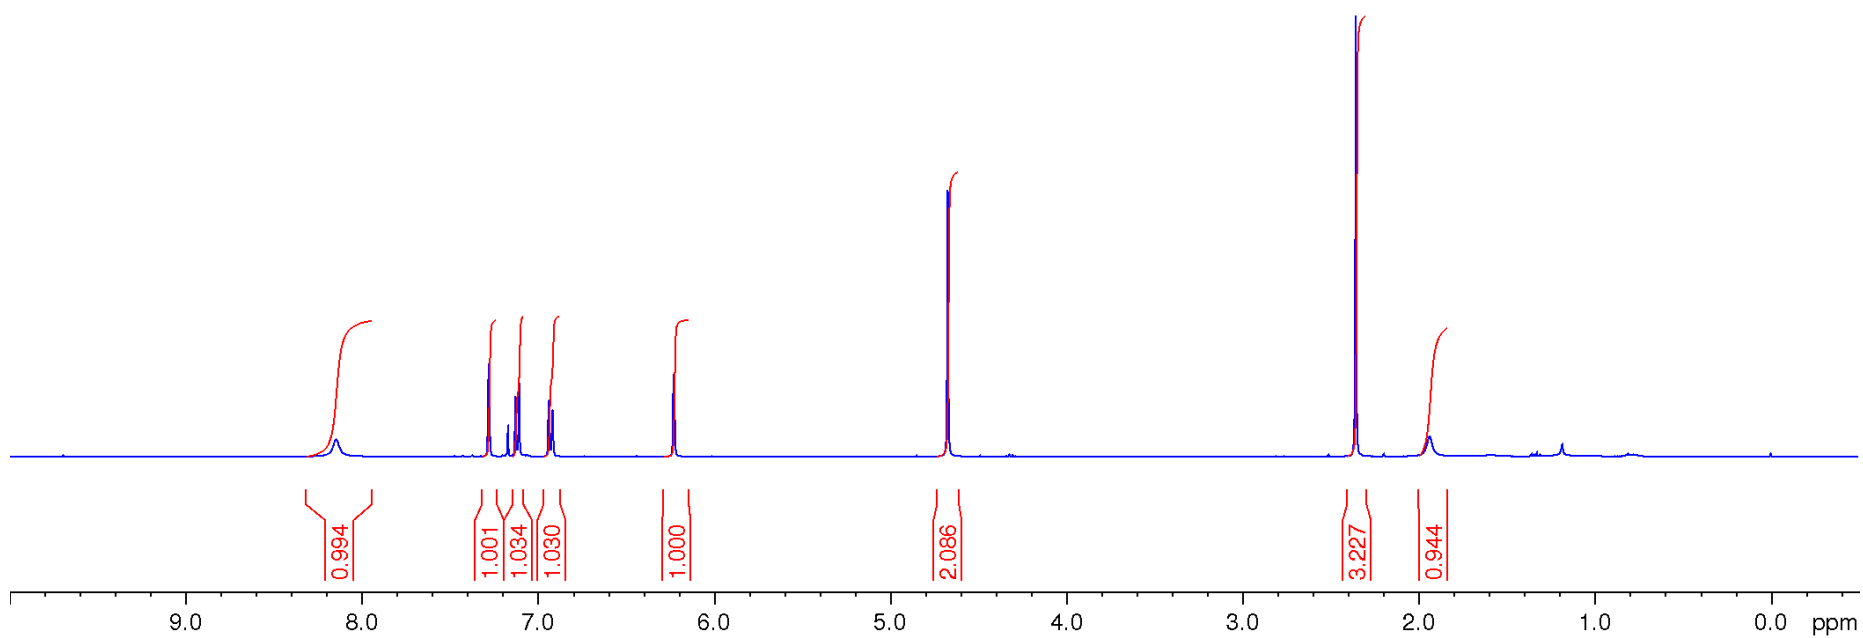



$^{13}\text{C}$  NMR-spectrum (100.6 MHz) ( $\text{CDCl}_3$ )

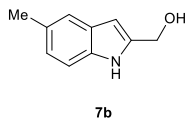

137.742  
134.812  
129.219  
128.380  
123.890  
120.354  
110.808  
100.237  
58.634  
21.540

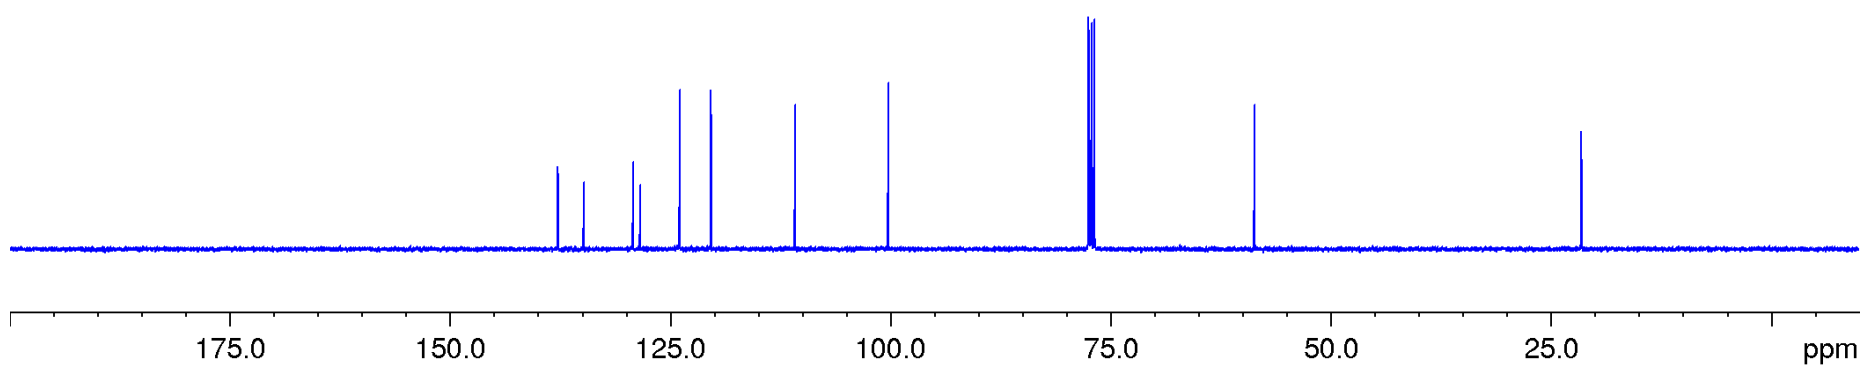

# DEPT 135 NMR-spectrum (CDCl<sub>3</sub>)

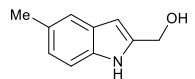

7b

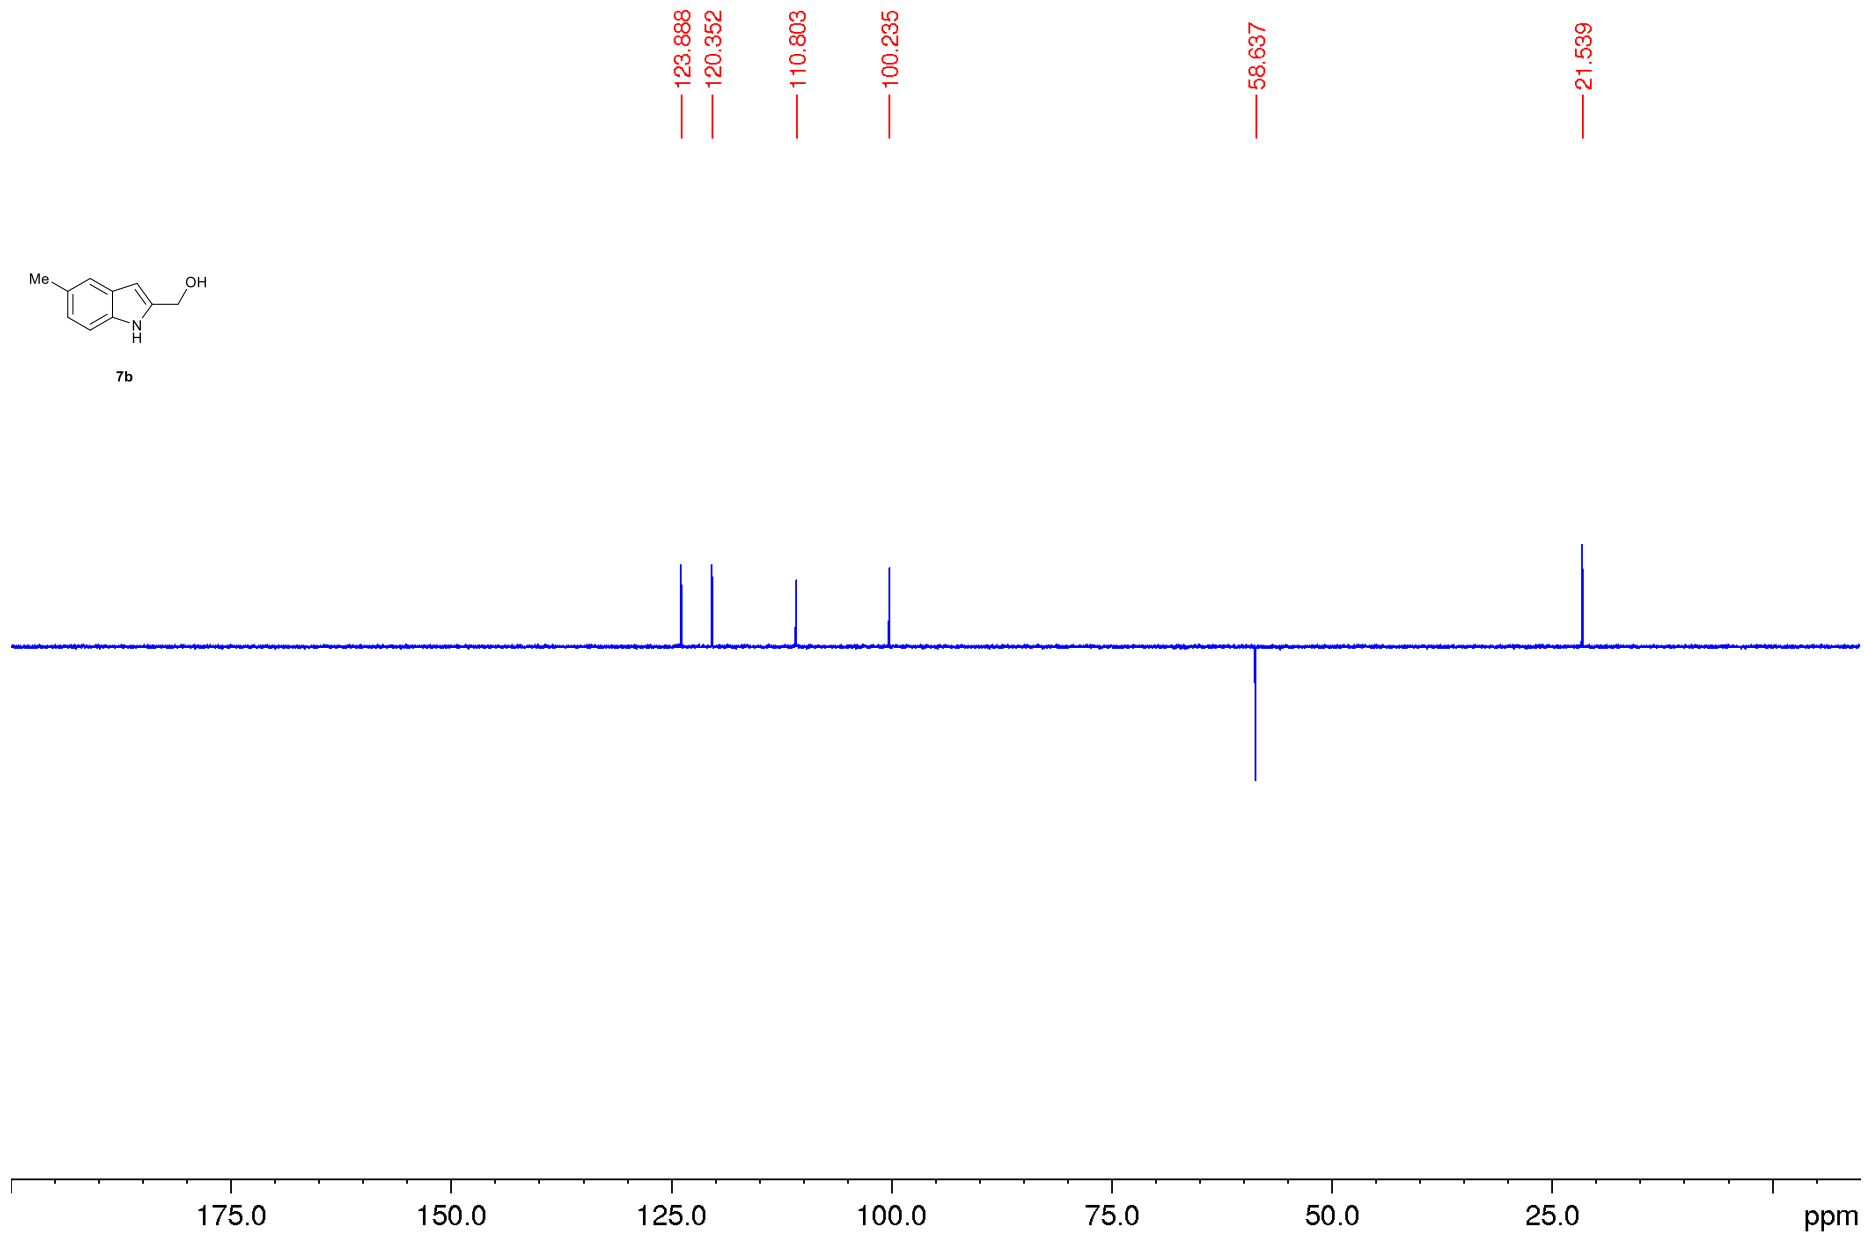

# $^1\text{H}$ NMR-spectrum (400.13 MHz) ( $\text{CDCl}_3$ )

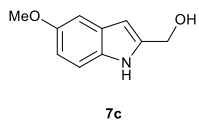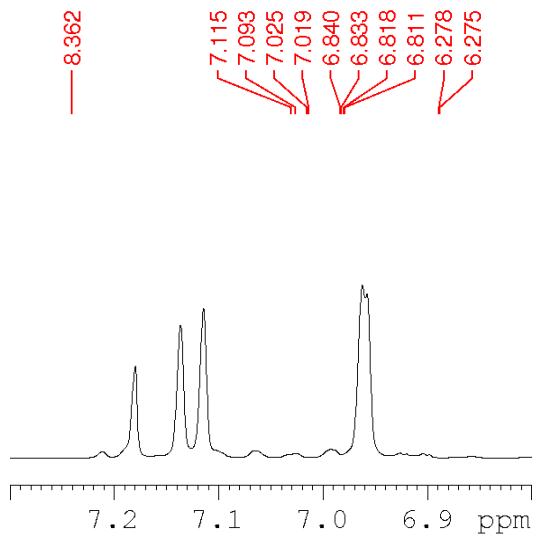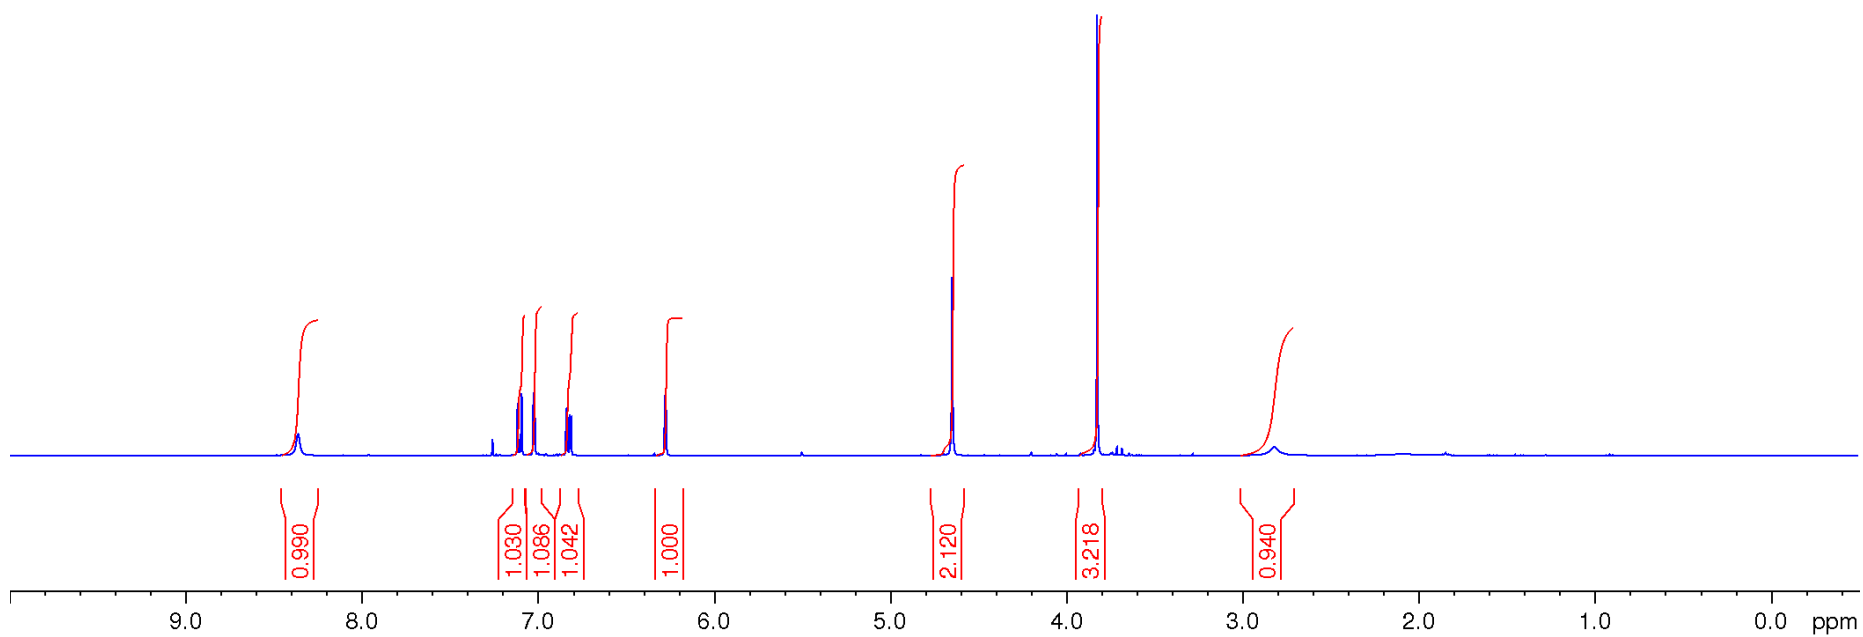

<sup>13</sup>C NMR-spectrum (100.6 MHz) (CDCl<sub>3</sub>)



154.210  
138.453  
131.654  
128.532  
112.387  
111.873  
102.488  
100.483  
58.546  
55.969

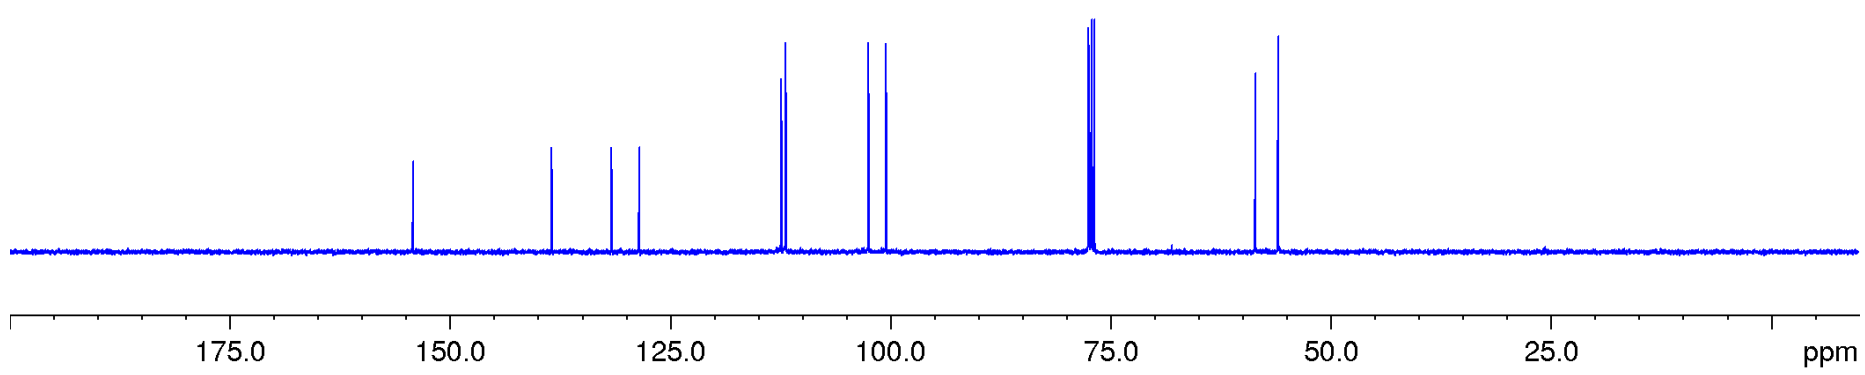

# DEPT 135 NMR-spectrum (CDCl<sub>3</sub>)

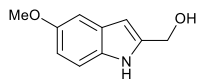

7c

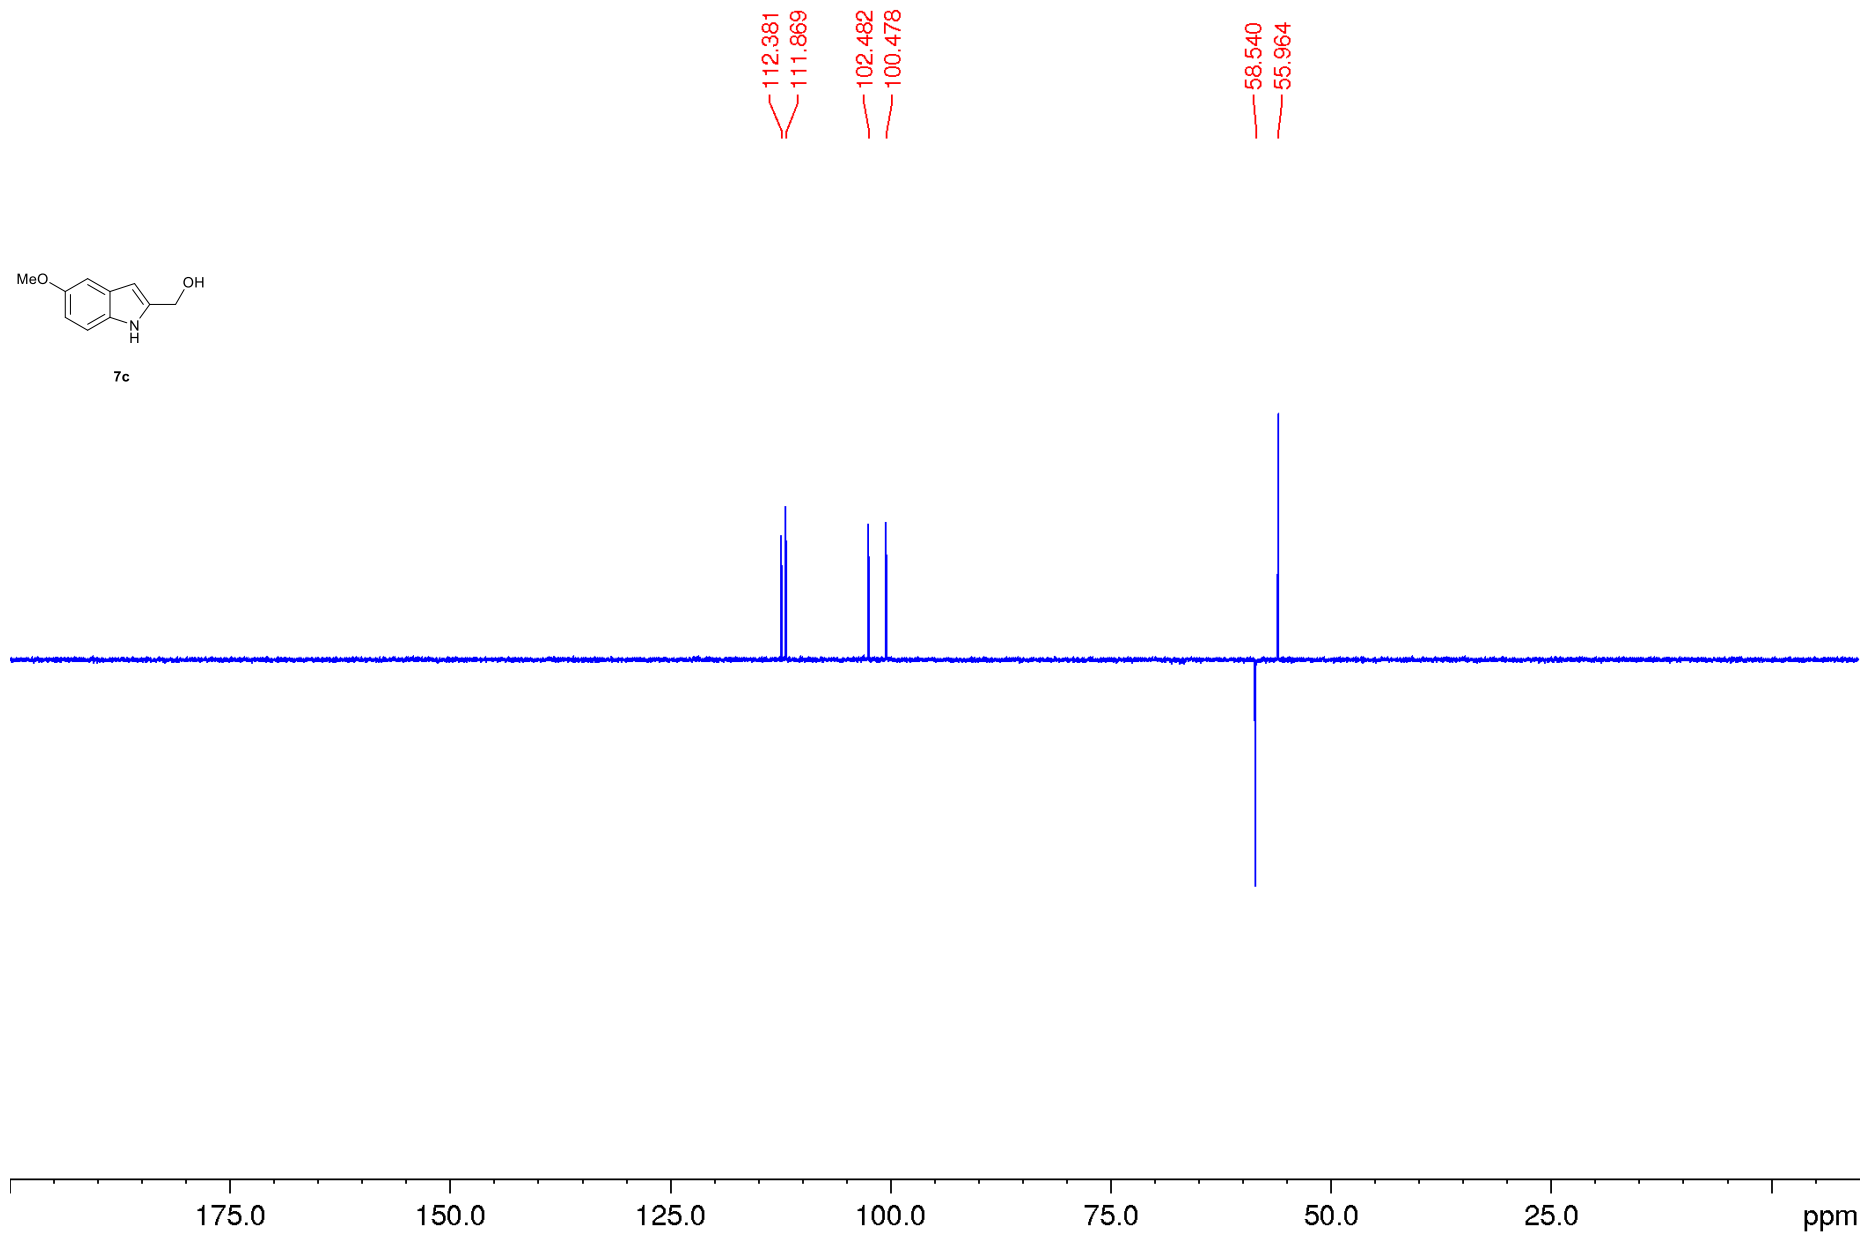

# <sup>1</sup>H NMR-spectrum (400.13 MHz) (CDCl<sub>3</sub>)

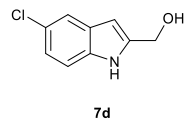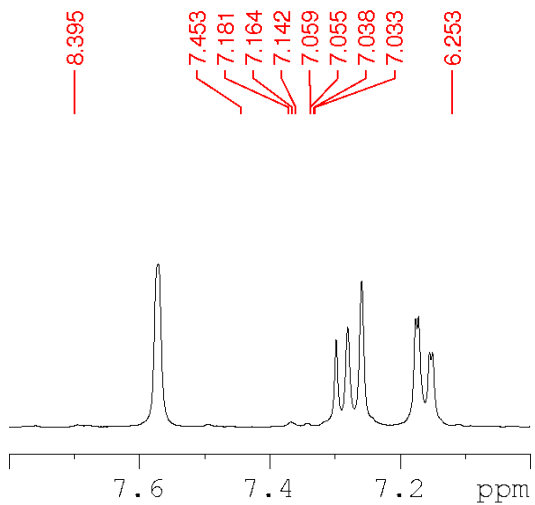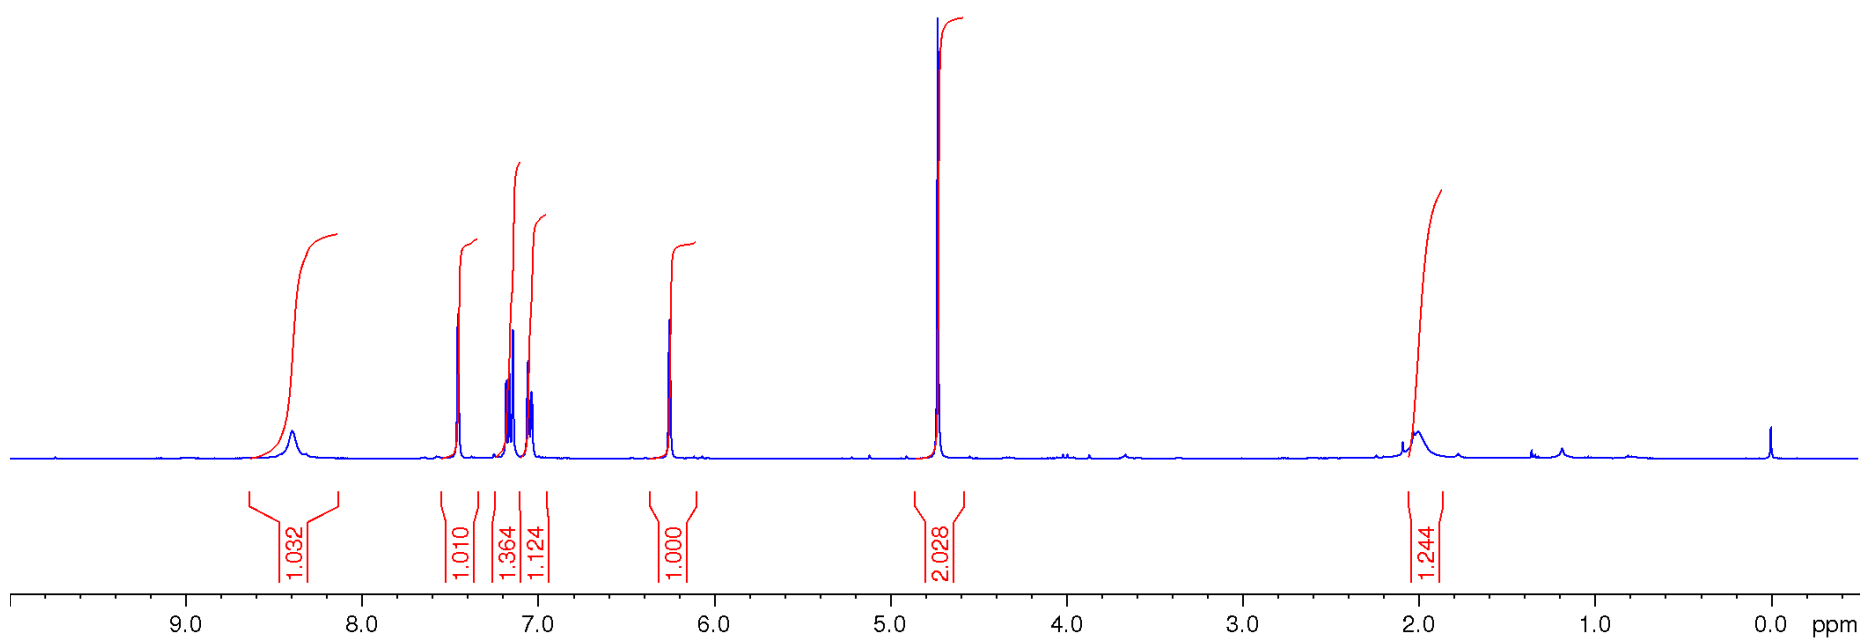

$^{13}\text{C}$  NMR-spectrum (100.6 MHz) ( $\text{CDCl}_3$ )

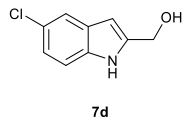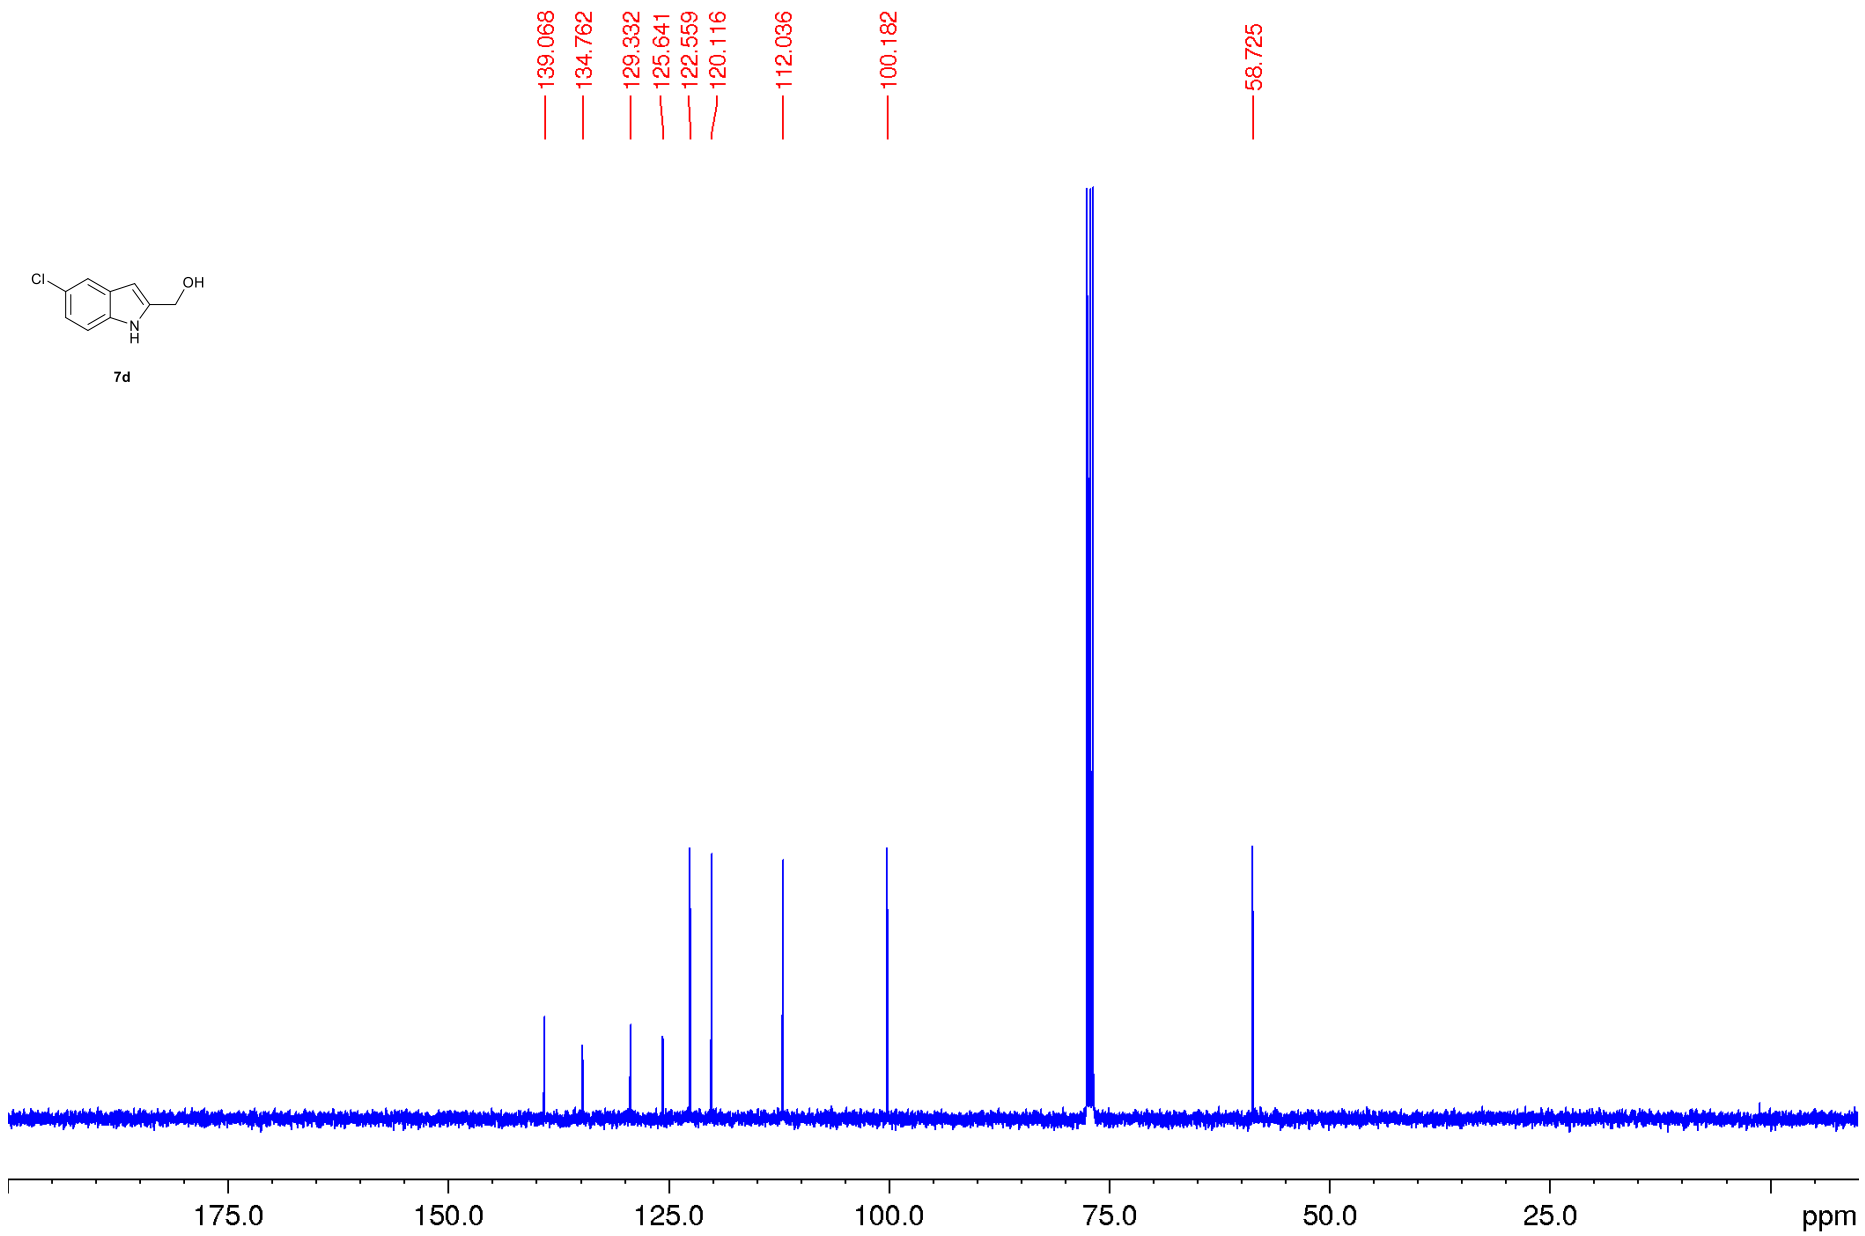

# DEPT 135 NMR-spectrum (CDCl<sub>3</sub>)

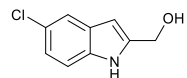

7d

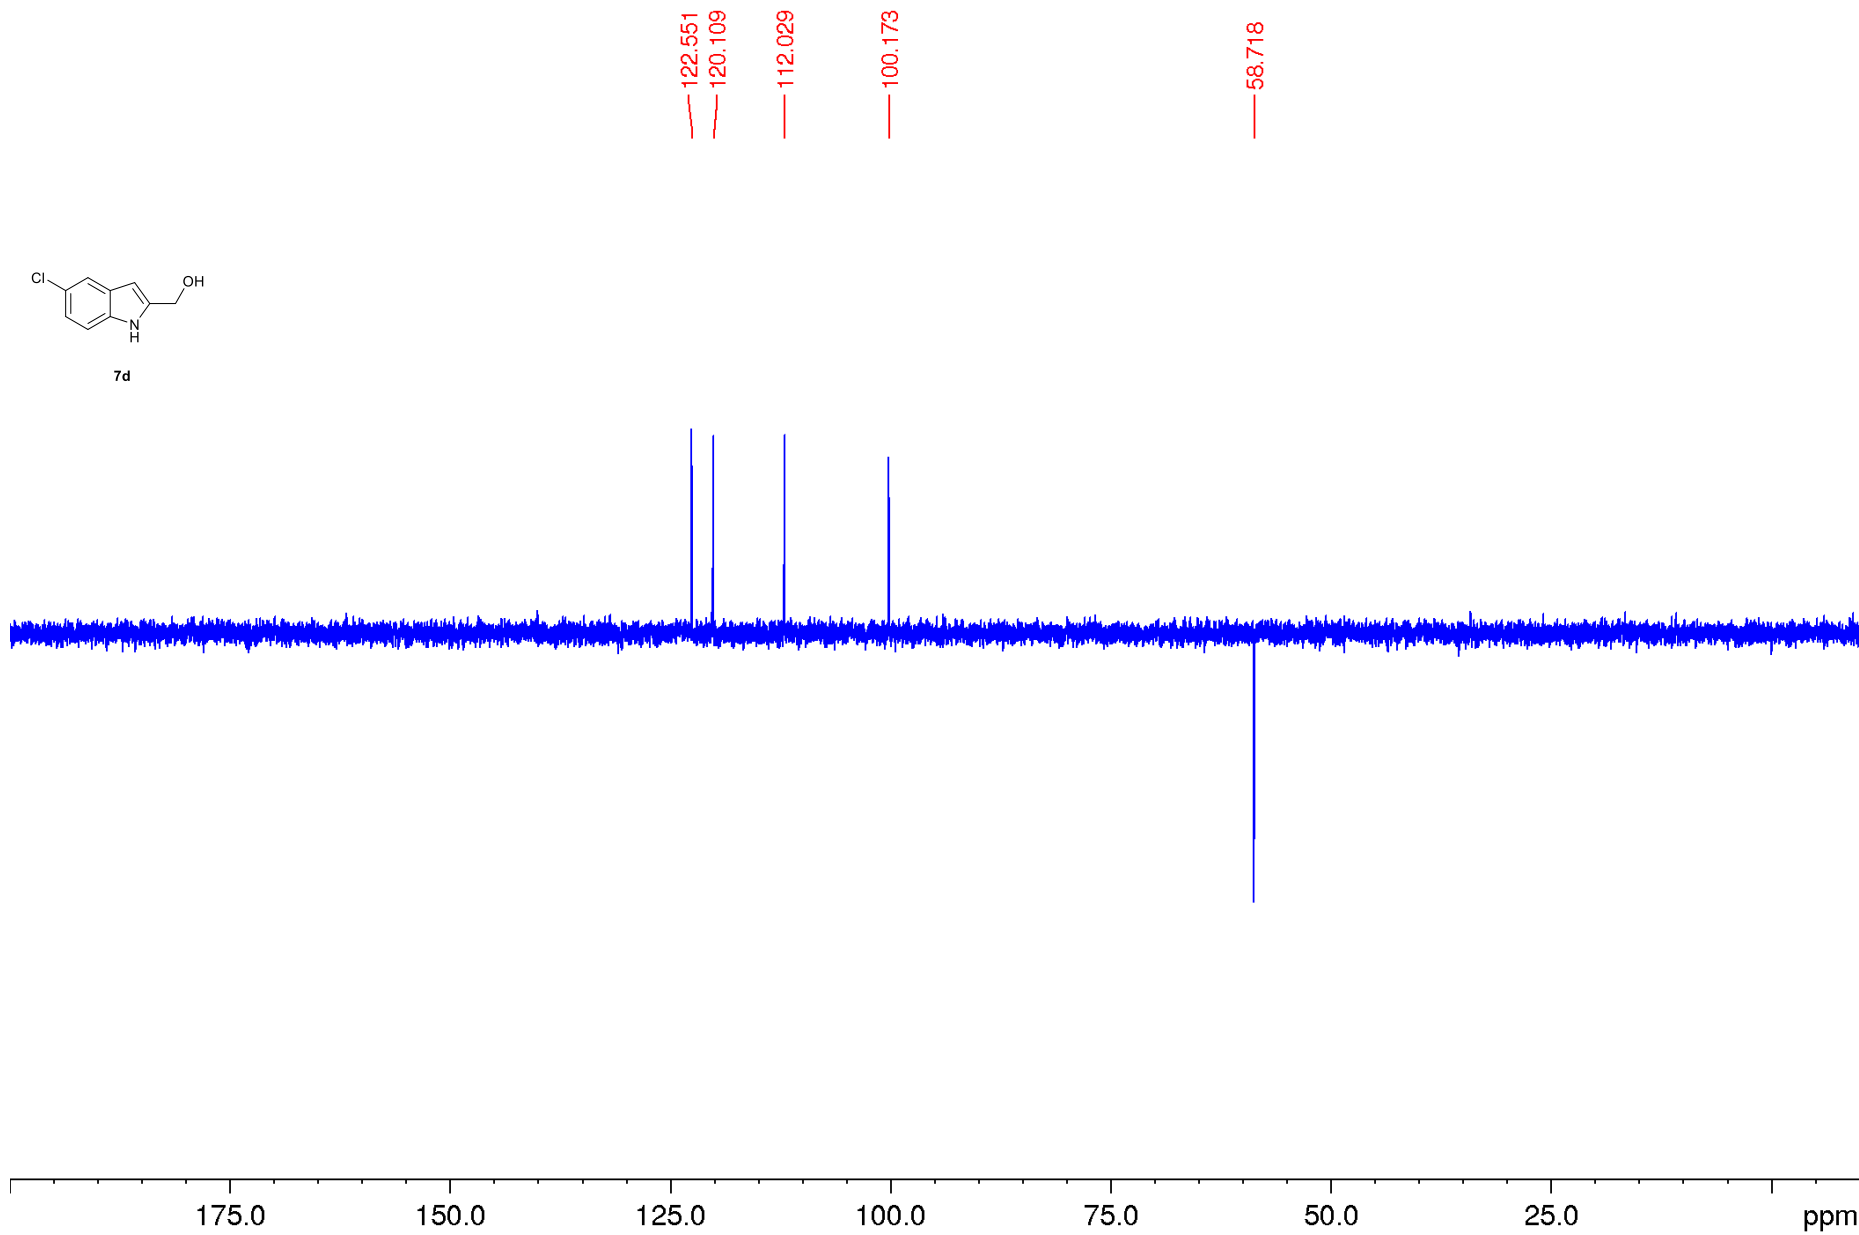



# $^1\text{H}$ NMR-spectrum (400.13 MHz) ( $\text{CDCl}_3$ )

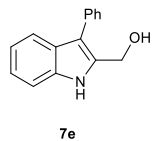

8.556  
7.740  
7.720  
7.476  
7.465  
7.374  
7.362  
7.353  
7.340  
7.330  
7.260  
7.243  
7.241  
7.223  
7.221  
7.178  
7.175  
7.158  
7.140  
7.138  
4.891

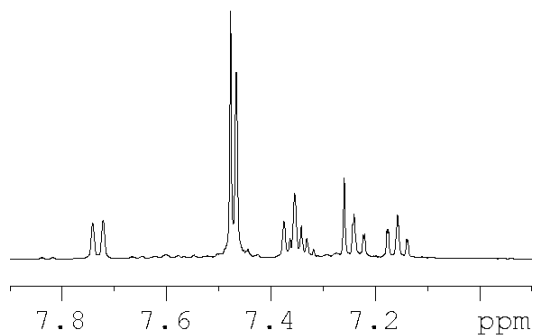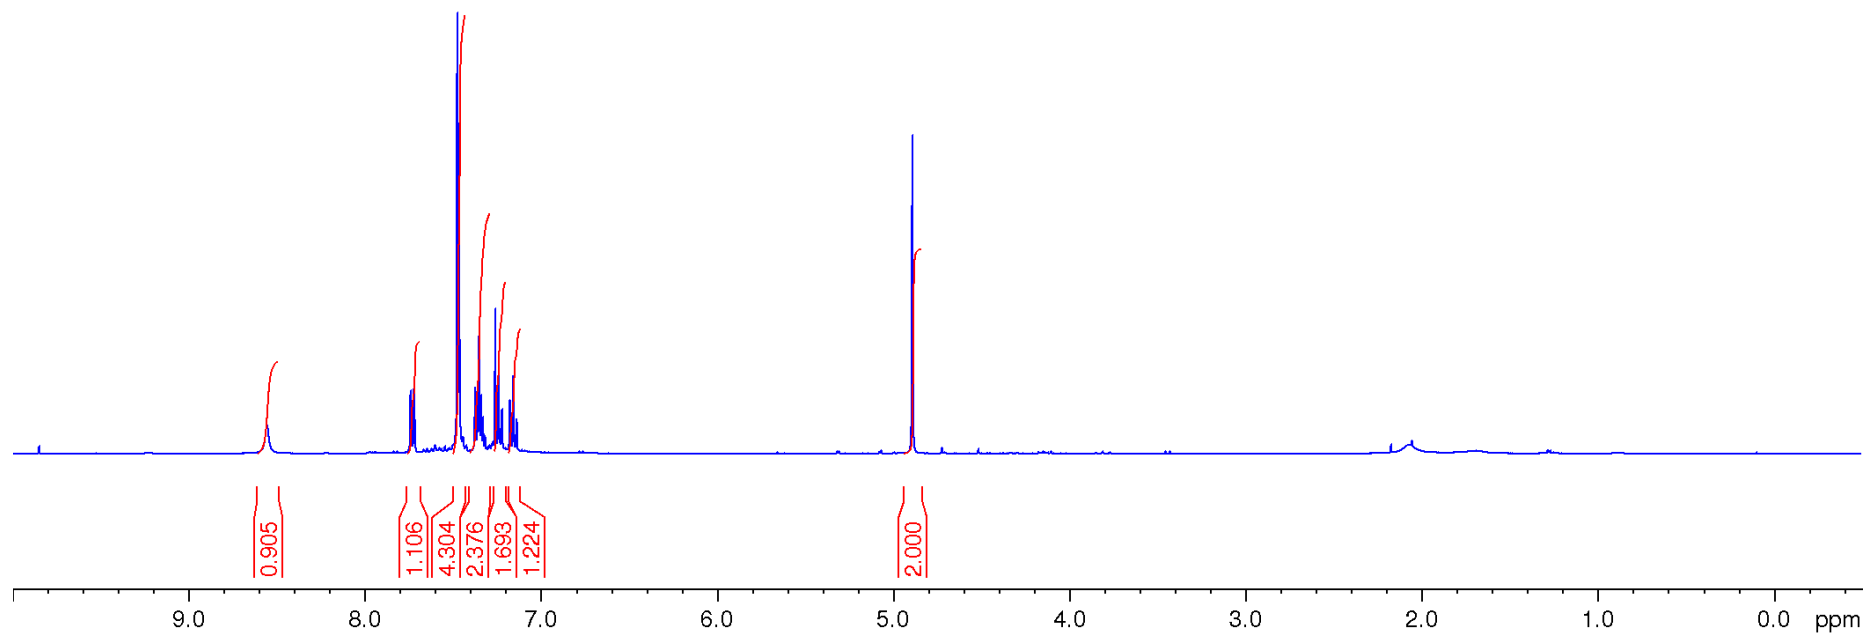

$^{13}\text{C}$  NMR-spectrum (100.6 MHz) ( $\text{CDCl}_3$ )

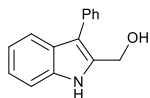

7e

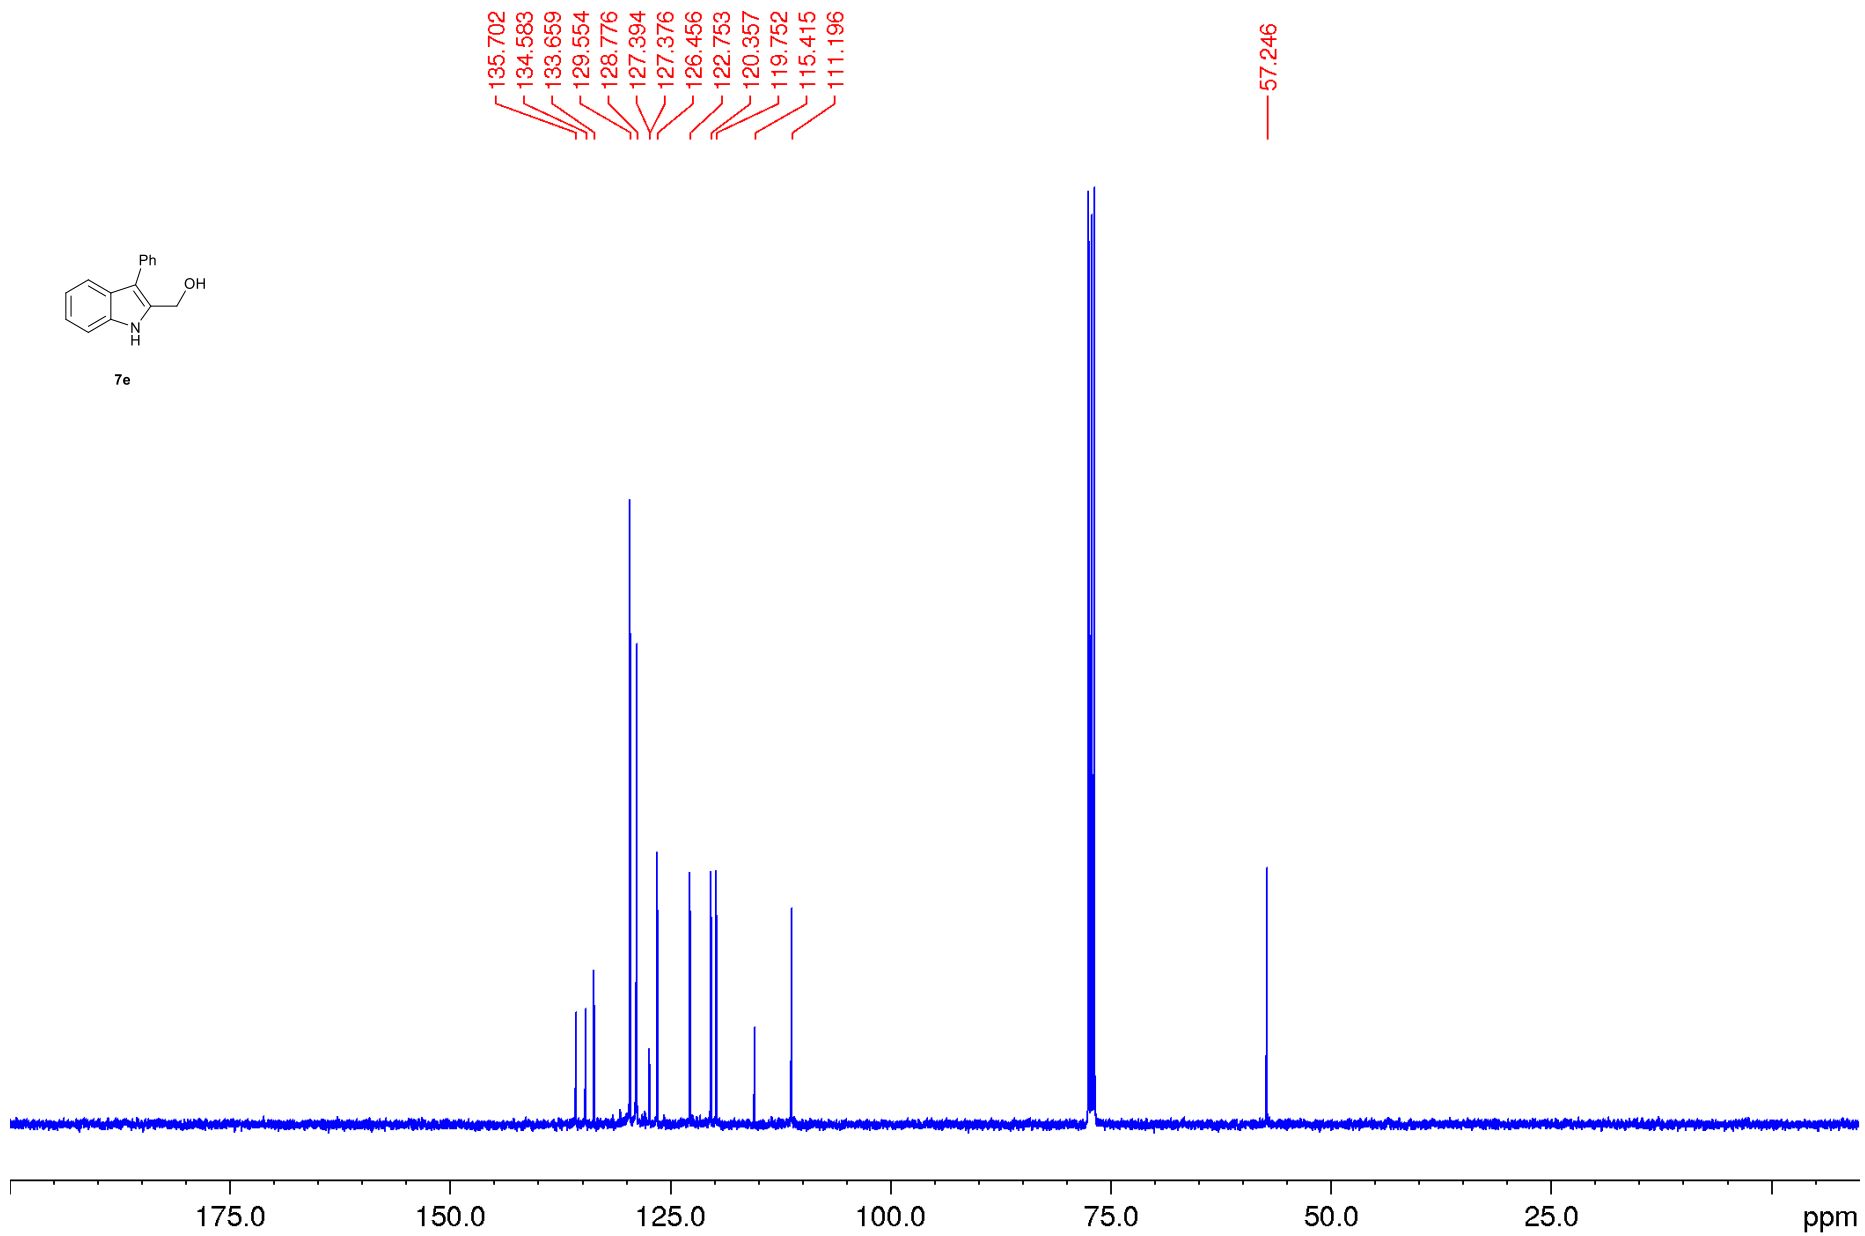

# DEPT 135 NMR-spectrum (CDCl<sub>3</sub>)



7e

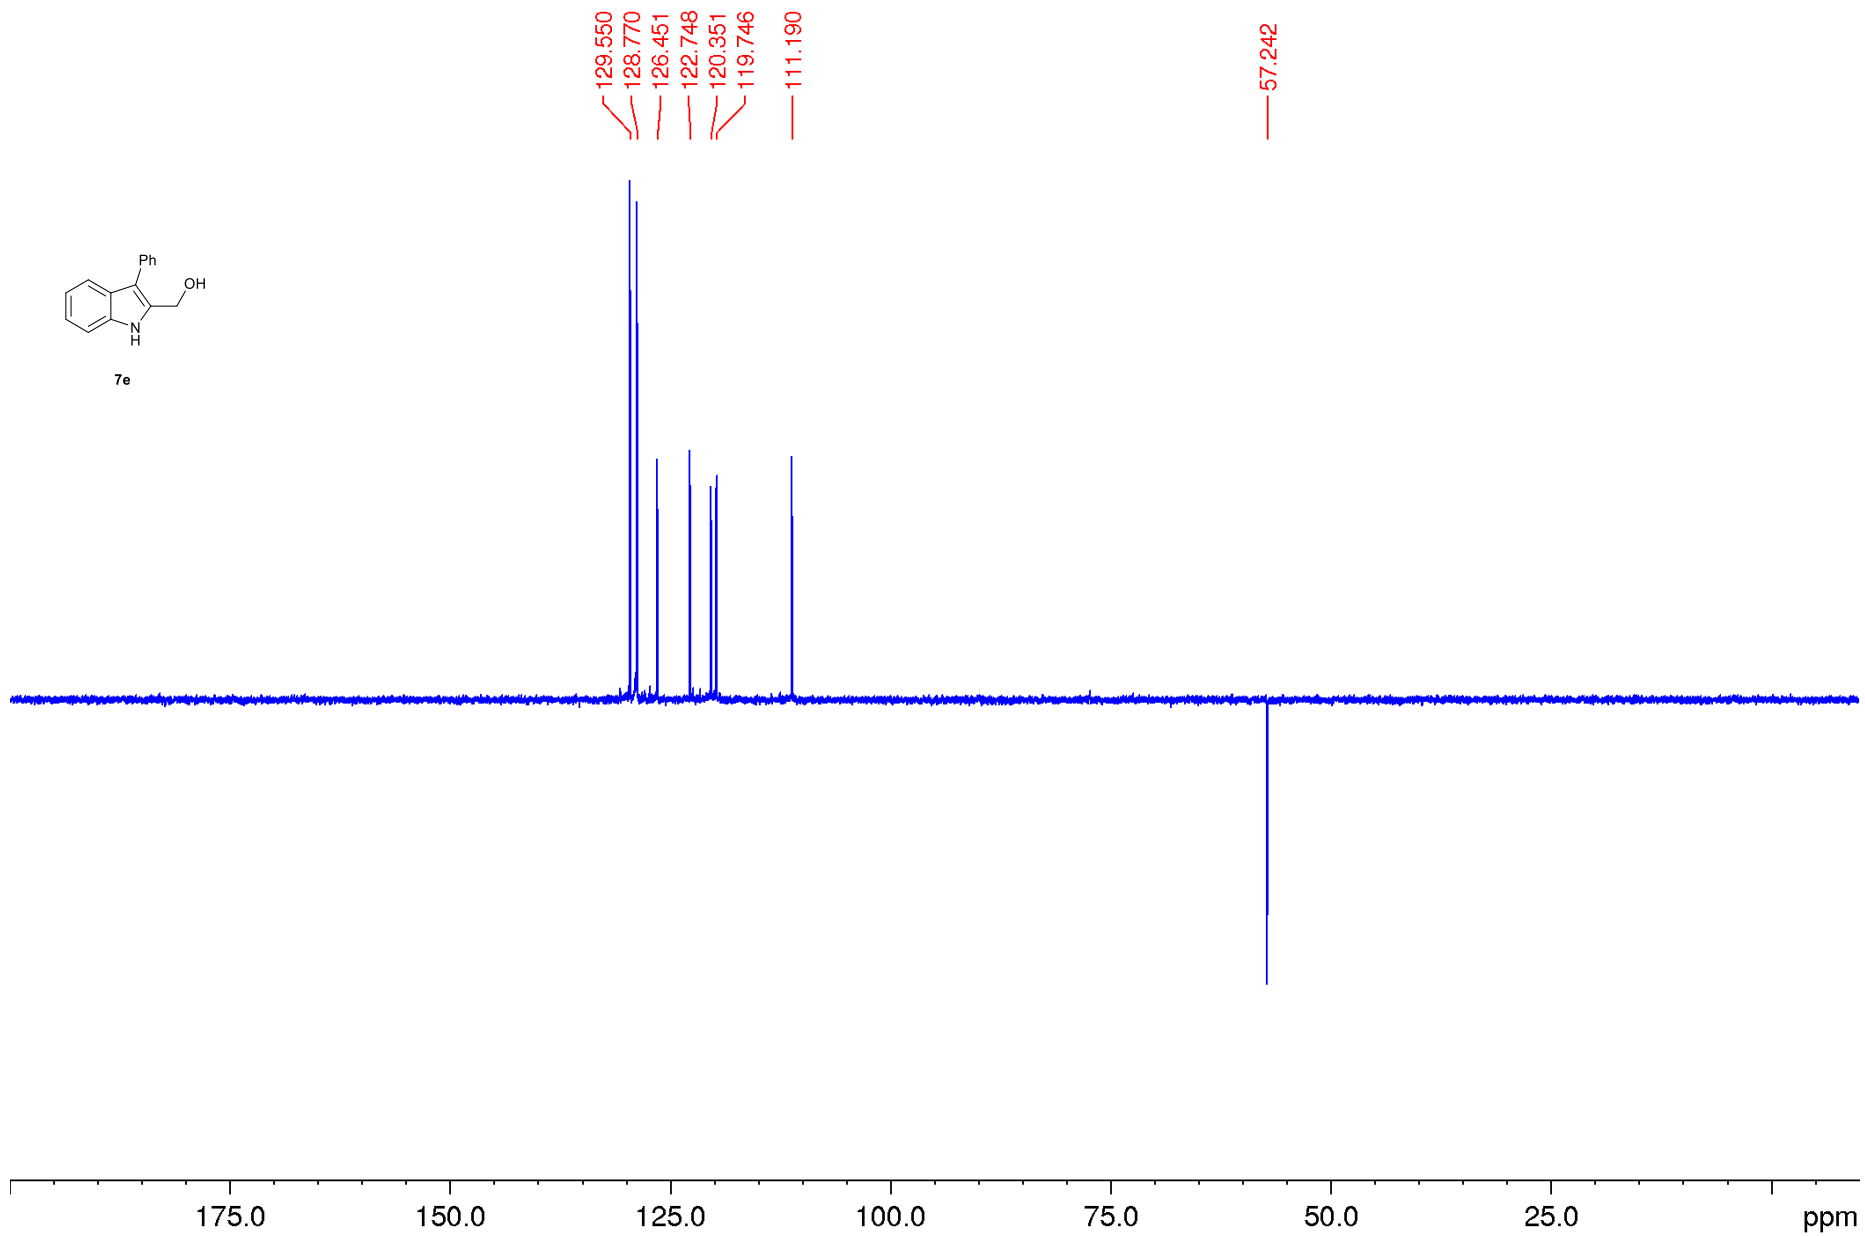

<sup>1</sup>H NMR-spectrum (400.13 MHz) (CDCl<sub>3</sub>)

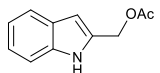

1a

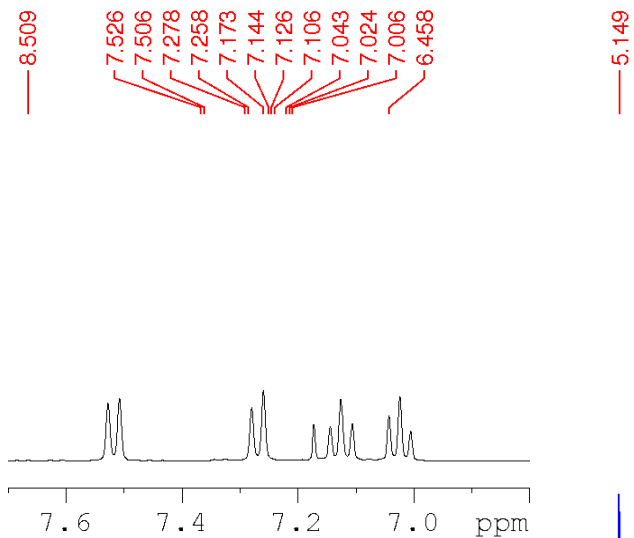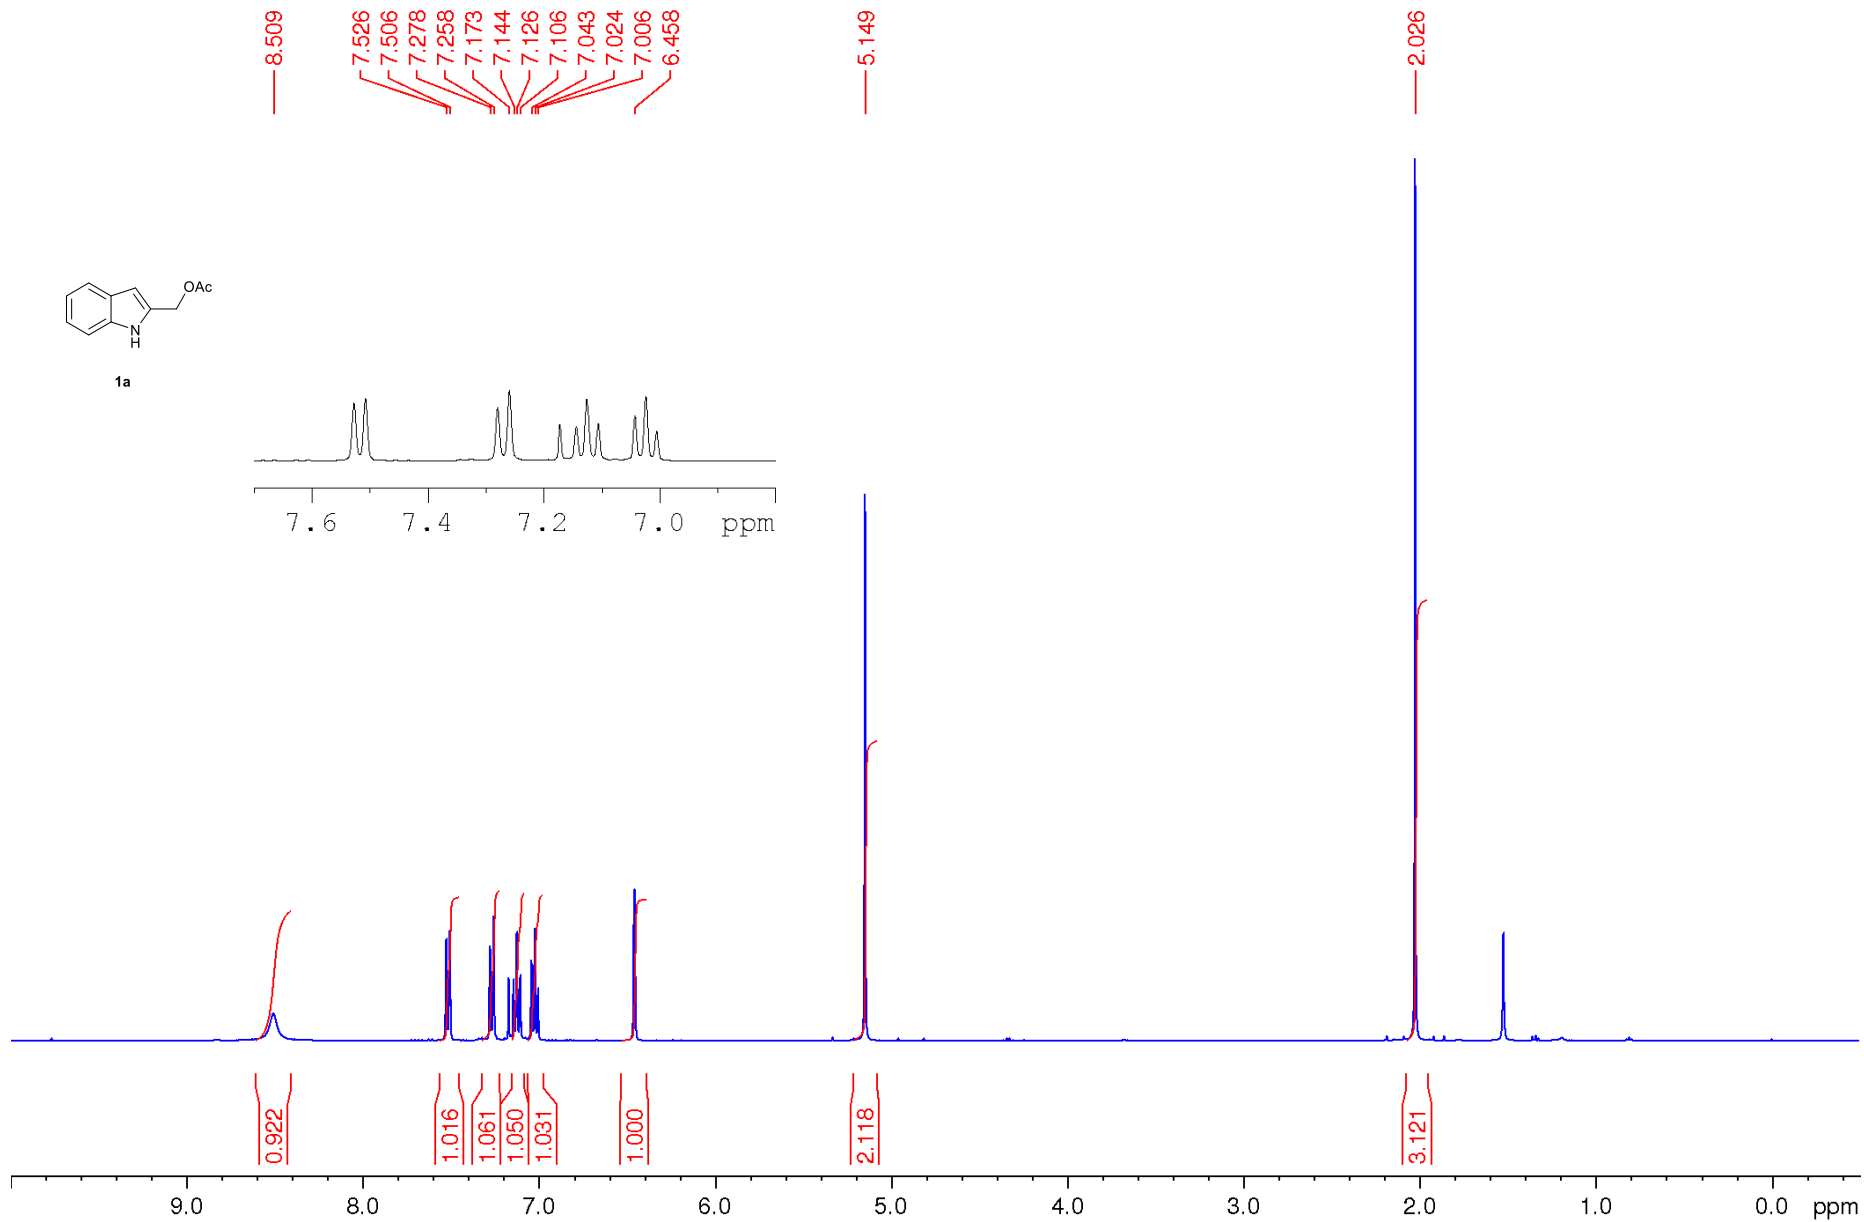

$^{13}\text{C}$  NMR-spectrum (100.6 MHz) ( $\text{CDCl}_3$ )

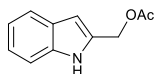

1a

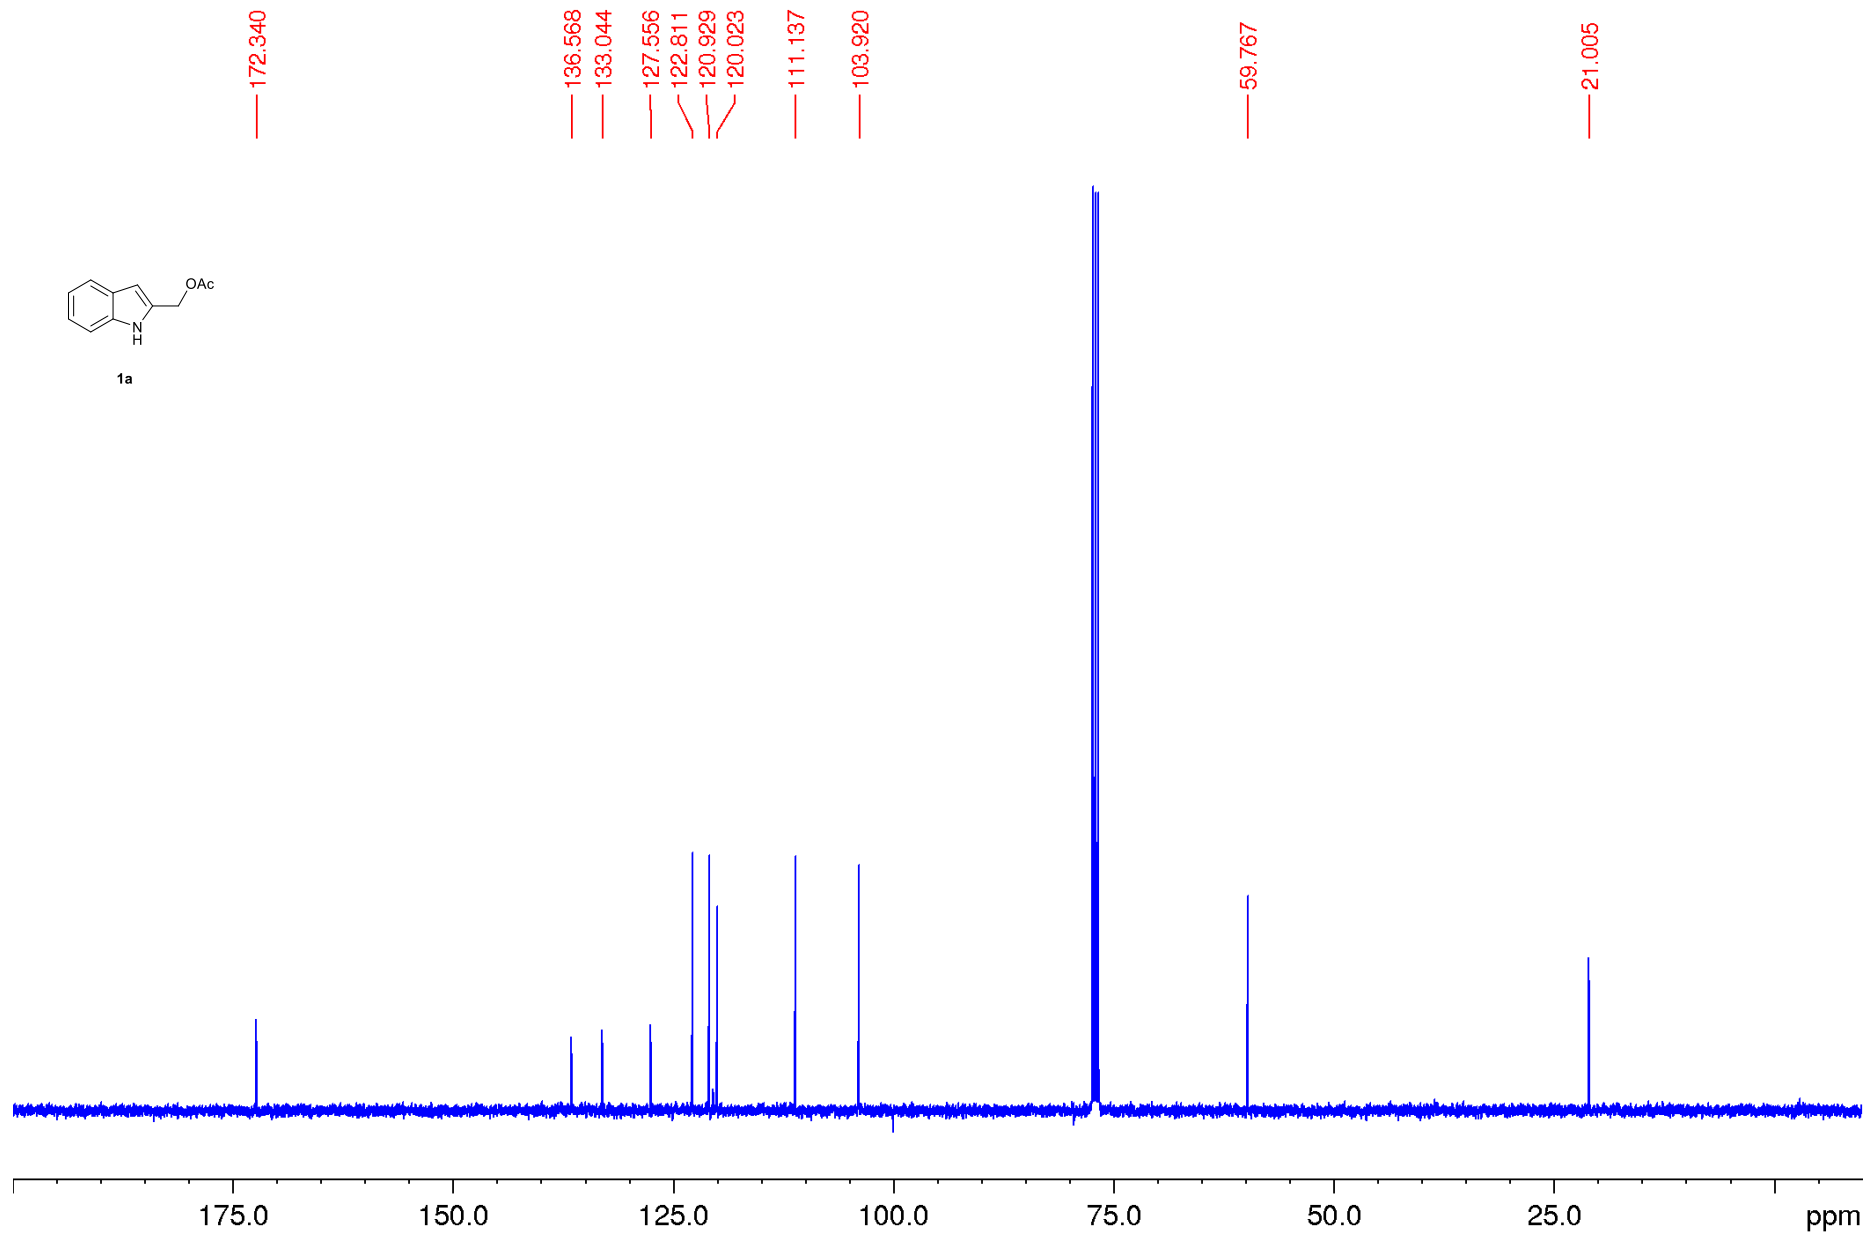

# DEPT 135 NMR-spectrum (CDCl<sub>3</sub>)

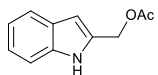

1a

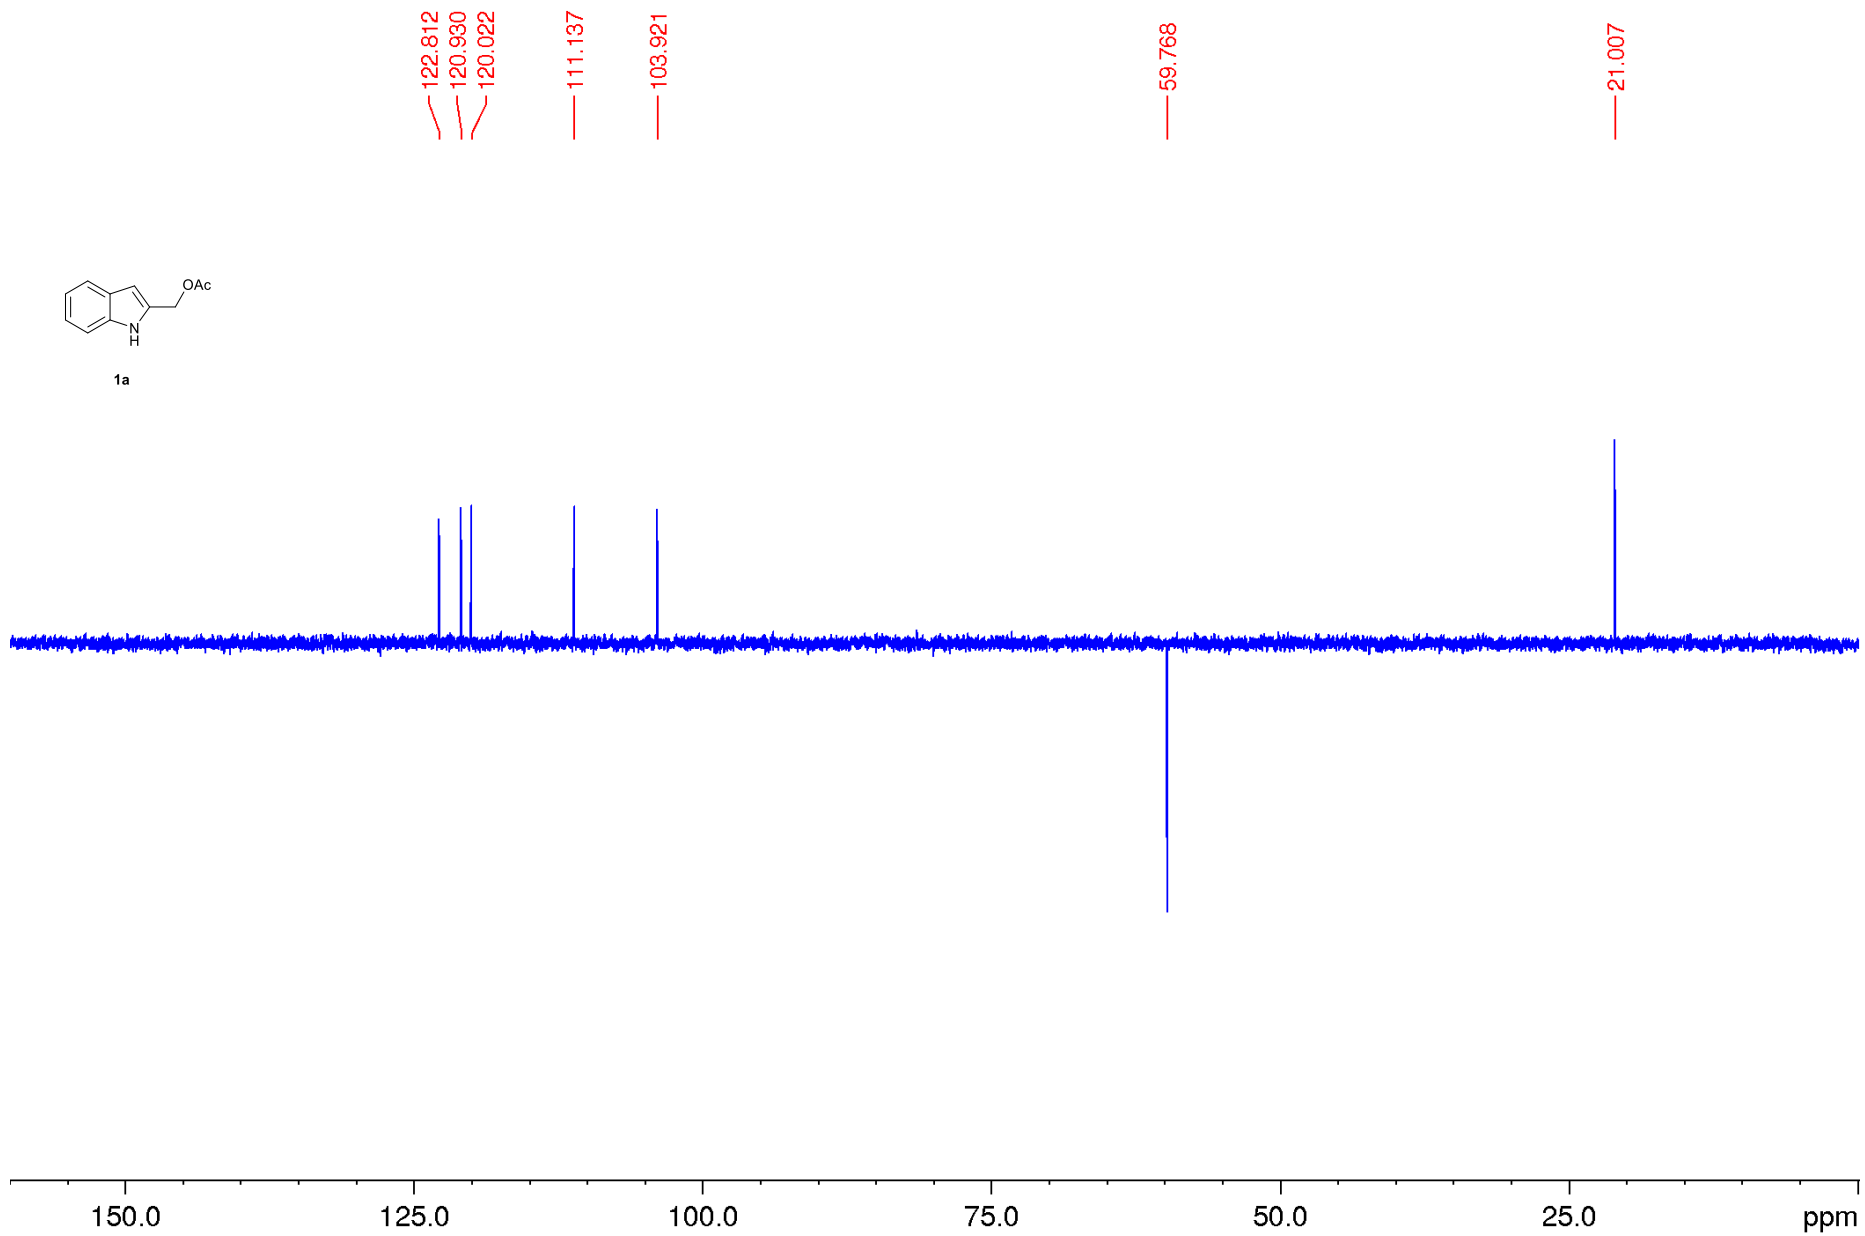

# $^1\text{H}$ NMR-spectrum (400.13 MHz) ( $\text{CDCl}_3$ )

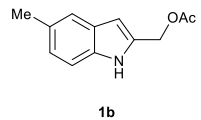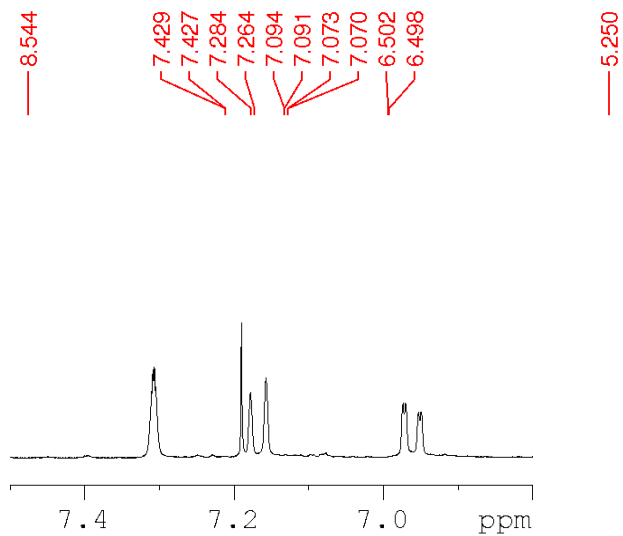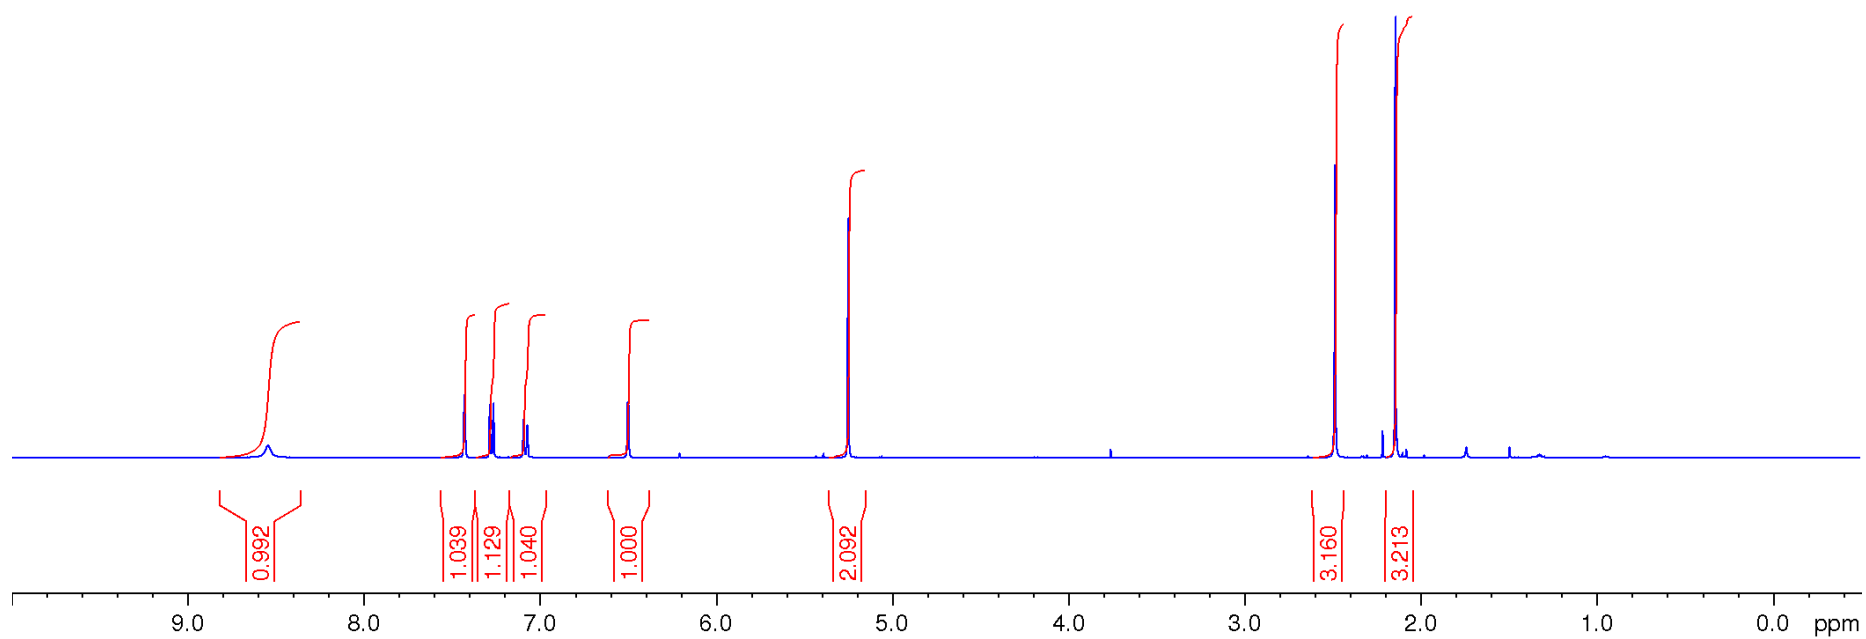

$^{13}\text{C}$  NMR-spectrum (100.6 MHz) ( $\text{CDCl}_3$ )

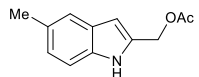

1b

172.350

134.996

133.145

129.269

127.926

124.527

120.563

110.871

103.500

59.897

21.515

21.074

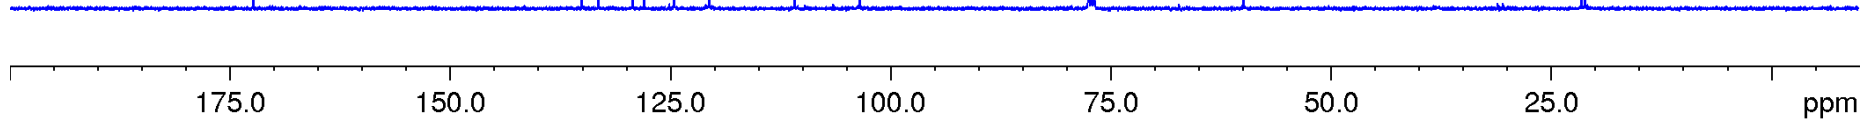

ppm



# DEPT 135 NMR-spectrum (CDCl<sub>3</sub>)



**1b**

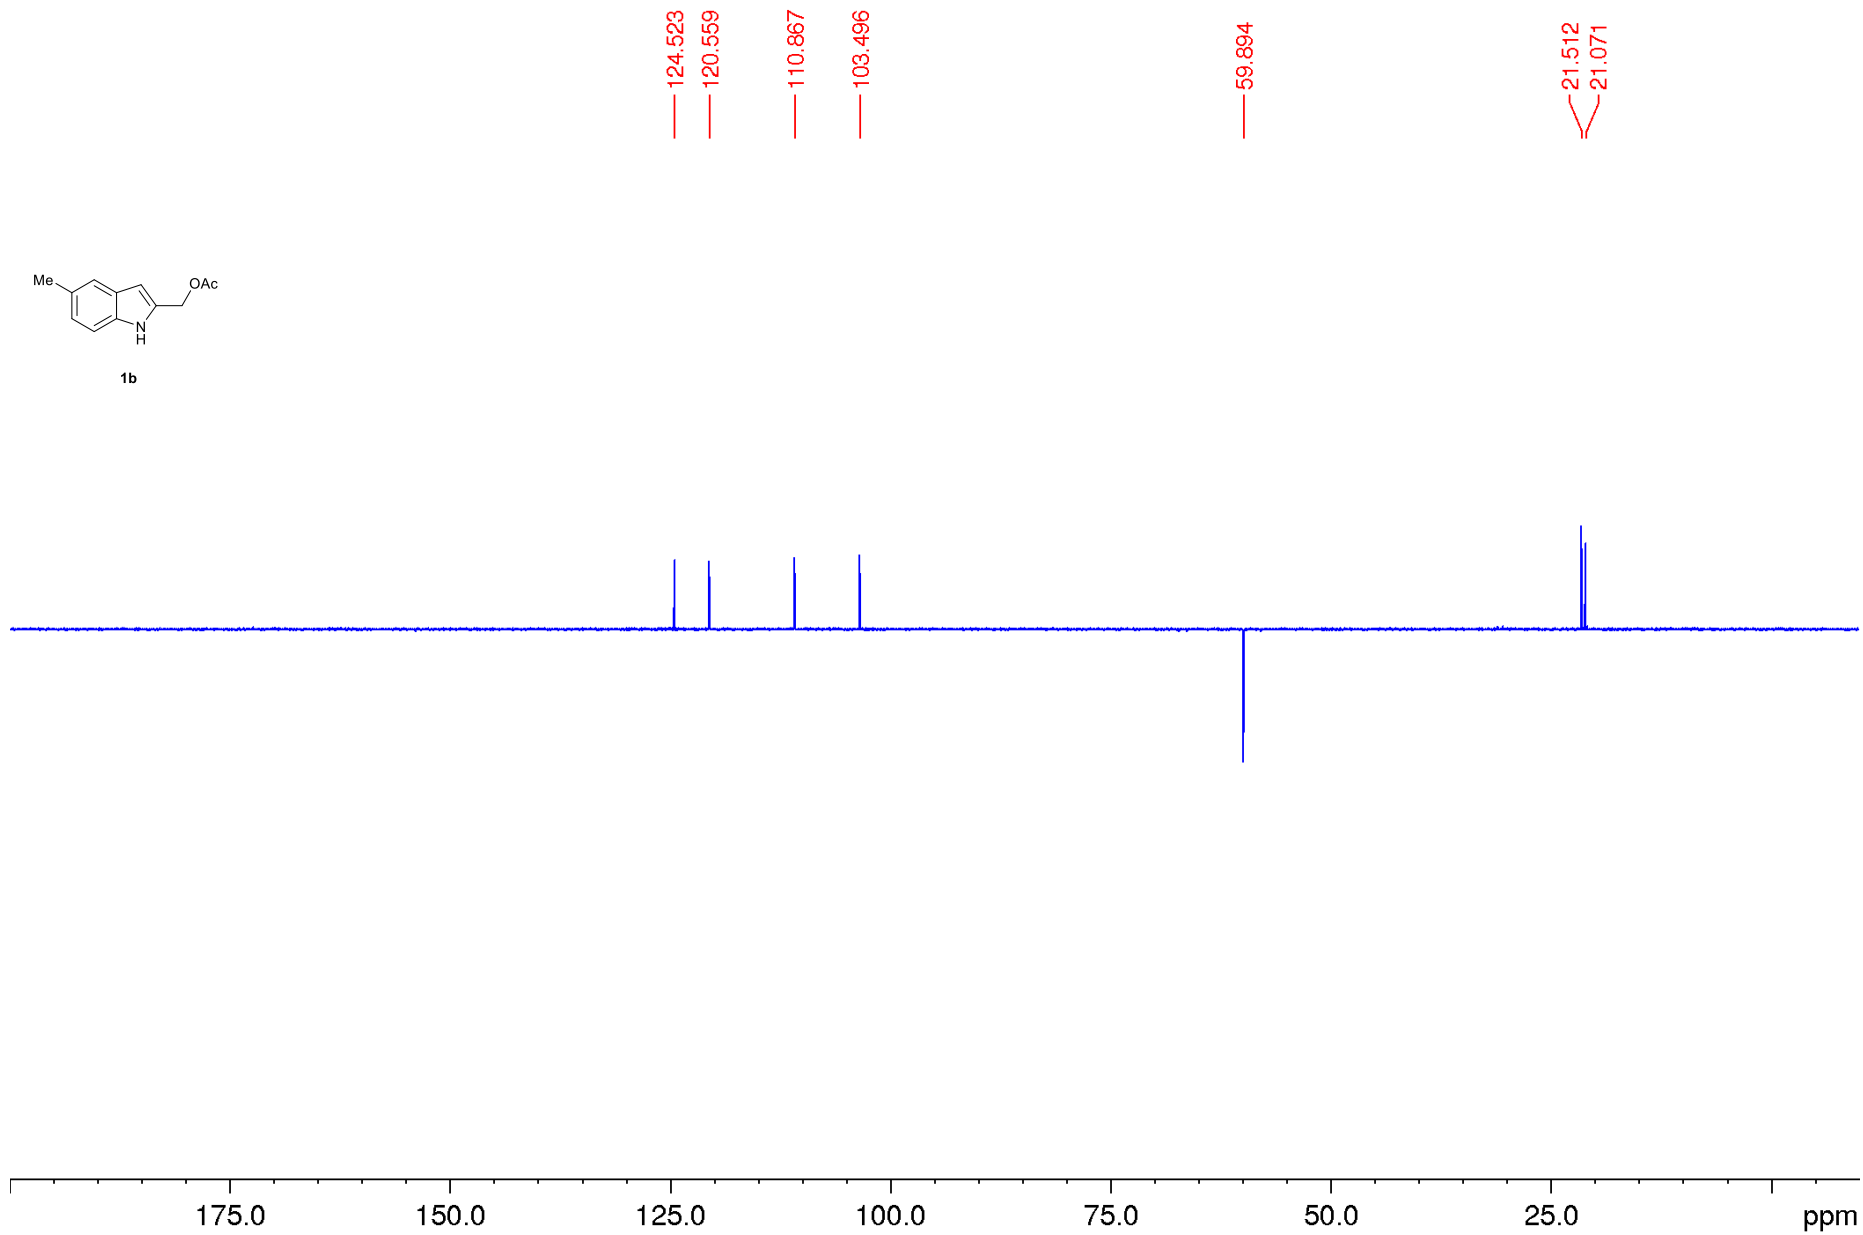

# <sup>1</sup>H NMR-spectrum (400.13 MHz) (CDCl<sub>3</sub>)

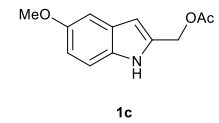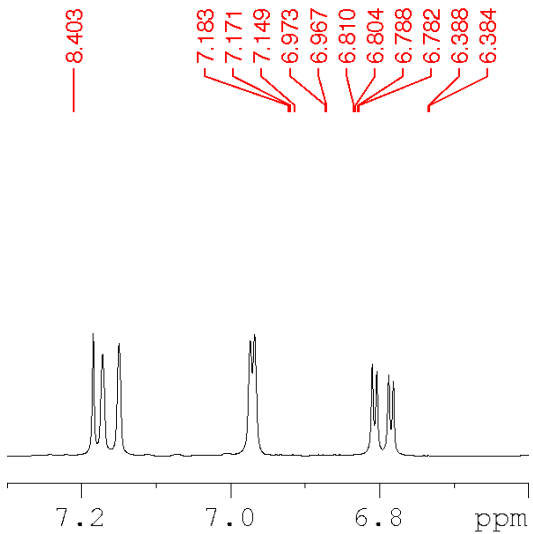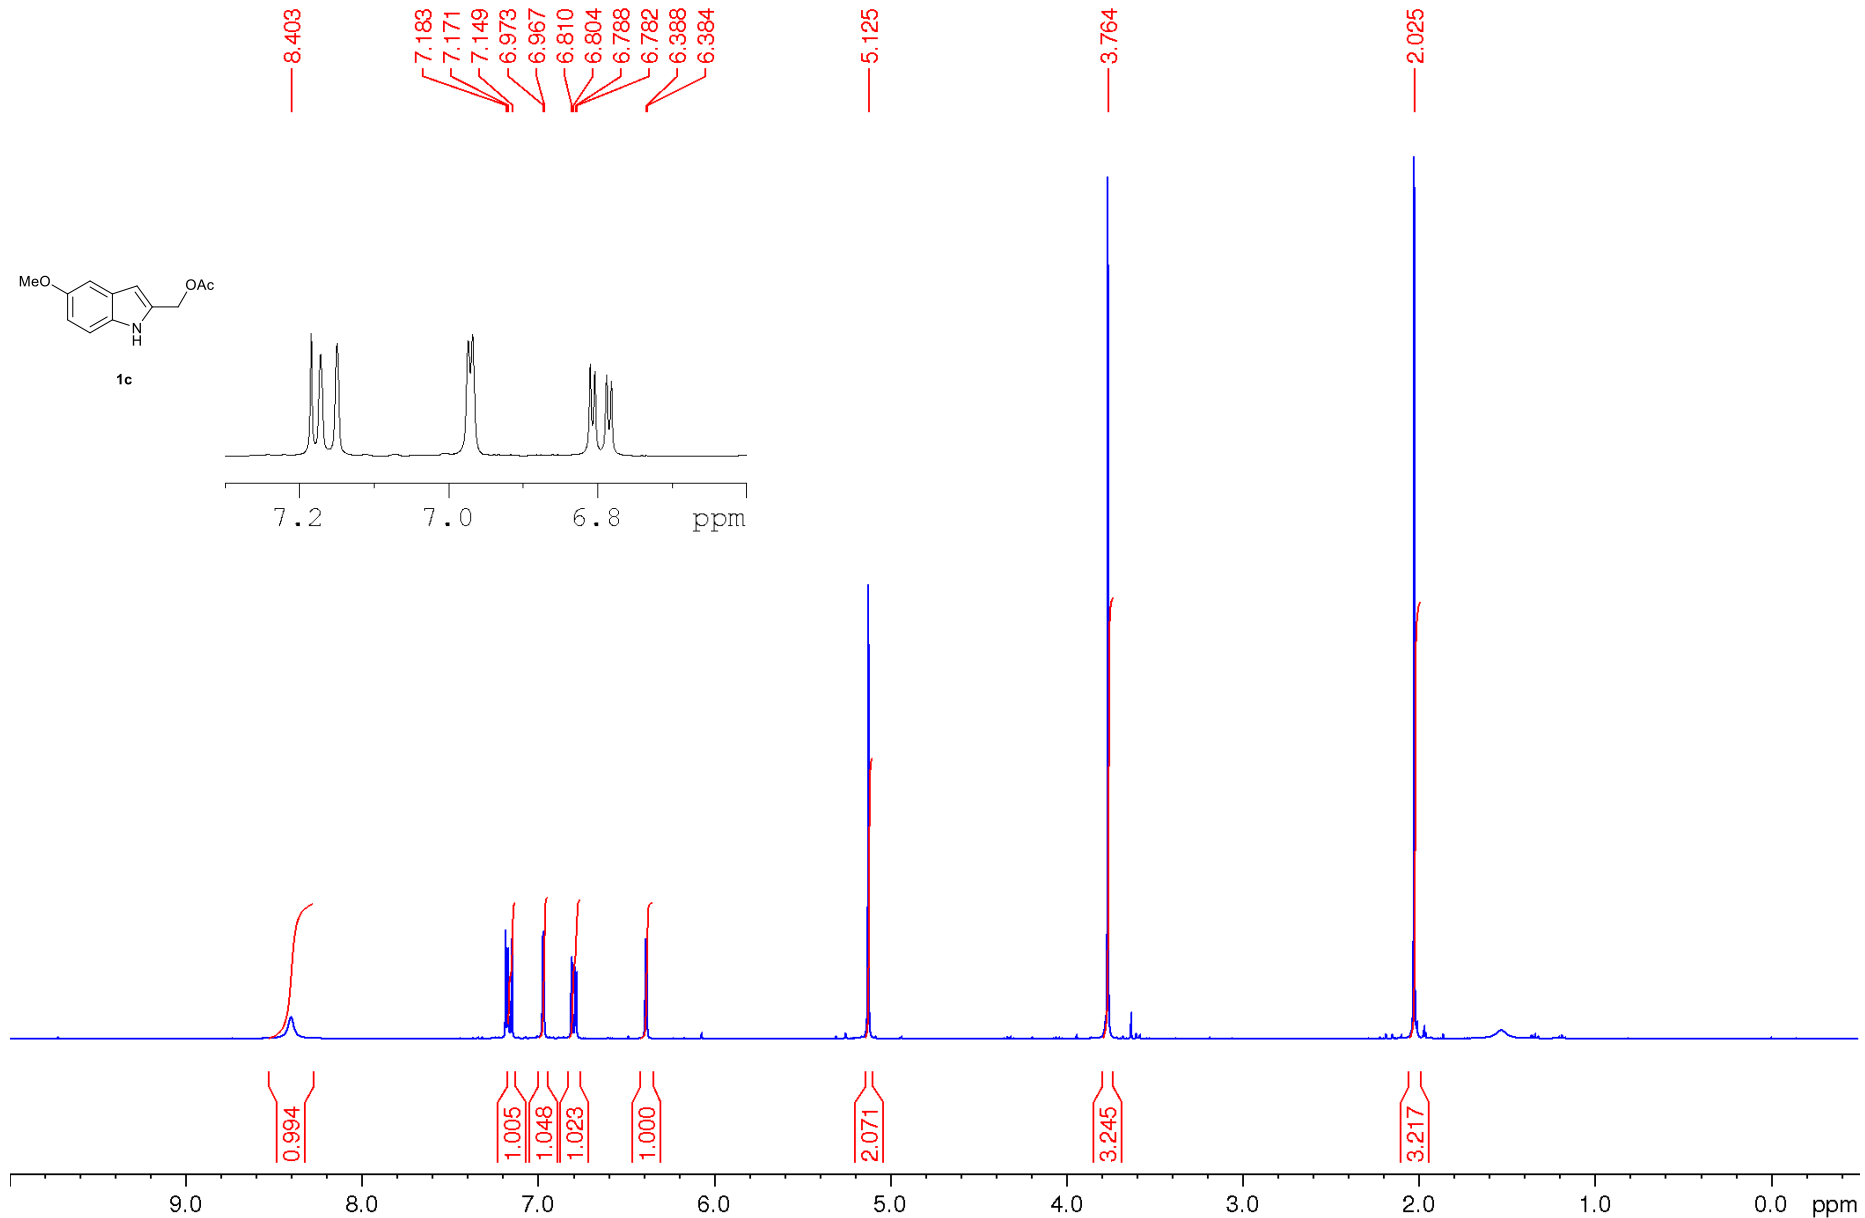

$^{13}\text{C}$  NMR-spectrum (100.6 MHz) ( $\text{CDCl}_3$ )

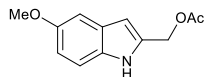

1c

172.319

154.267

138.671

131.757

127.965

113.272

111.935

103.683

102.345

59.783

55.840

21.032

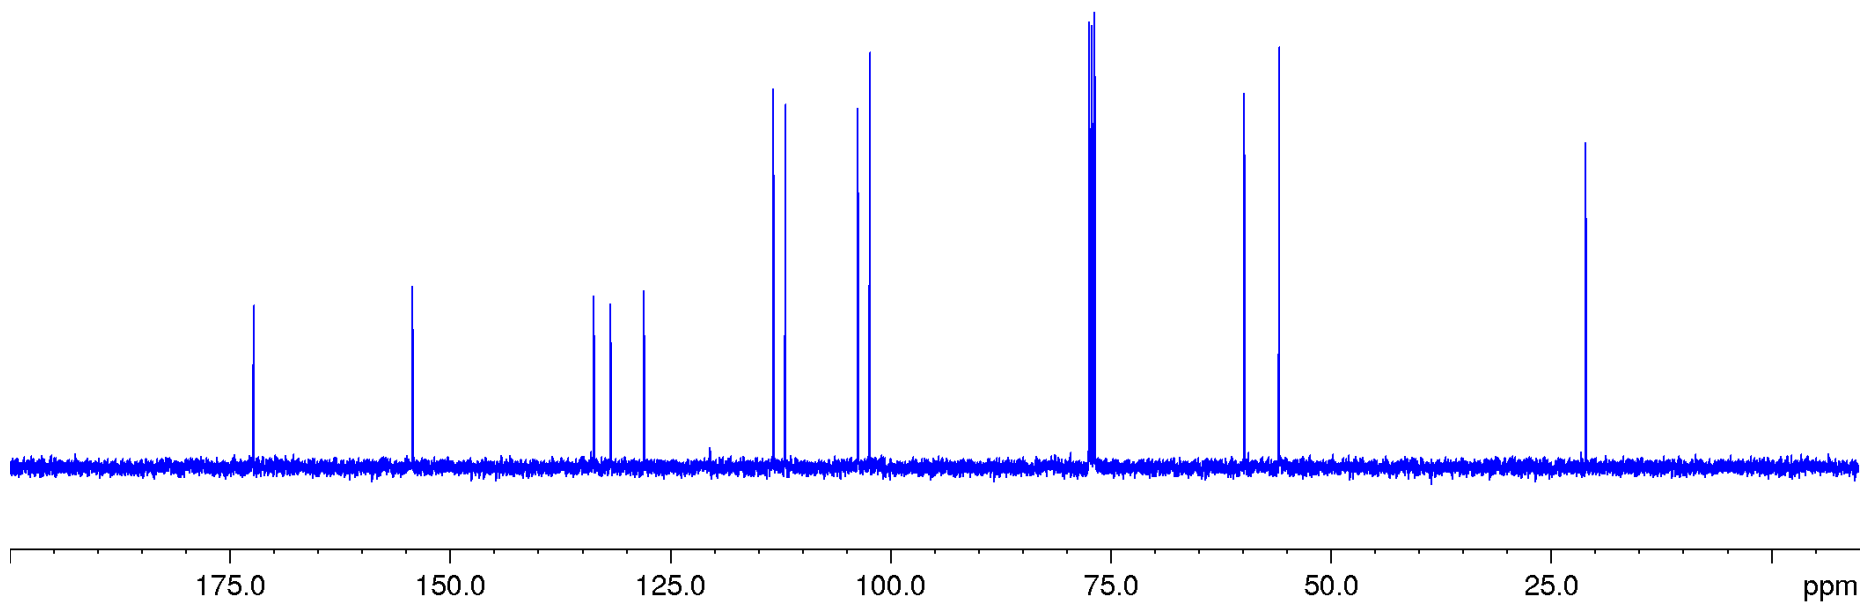

# DEPT 135 NMR-spectrum (CDCl<sub>3</sub>)

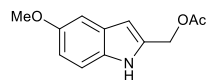

1c

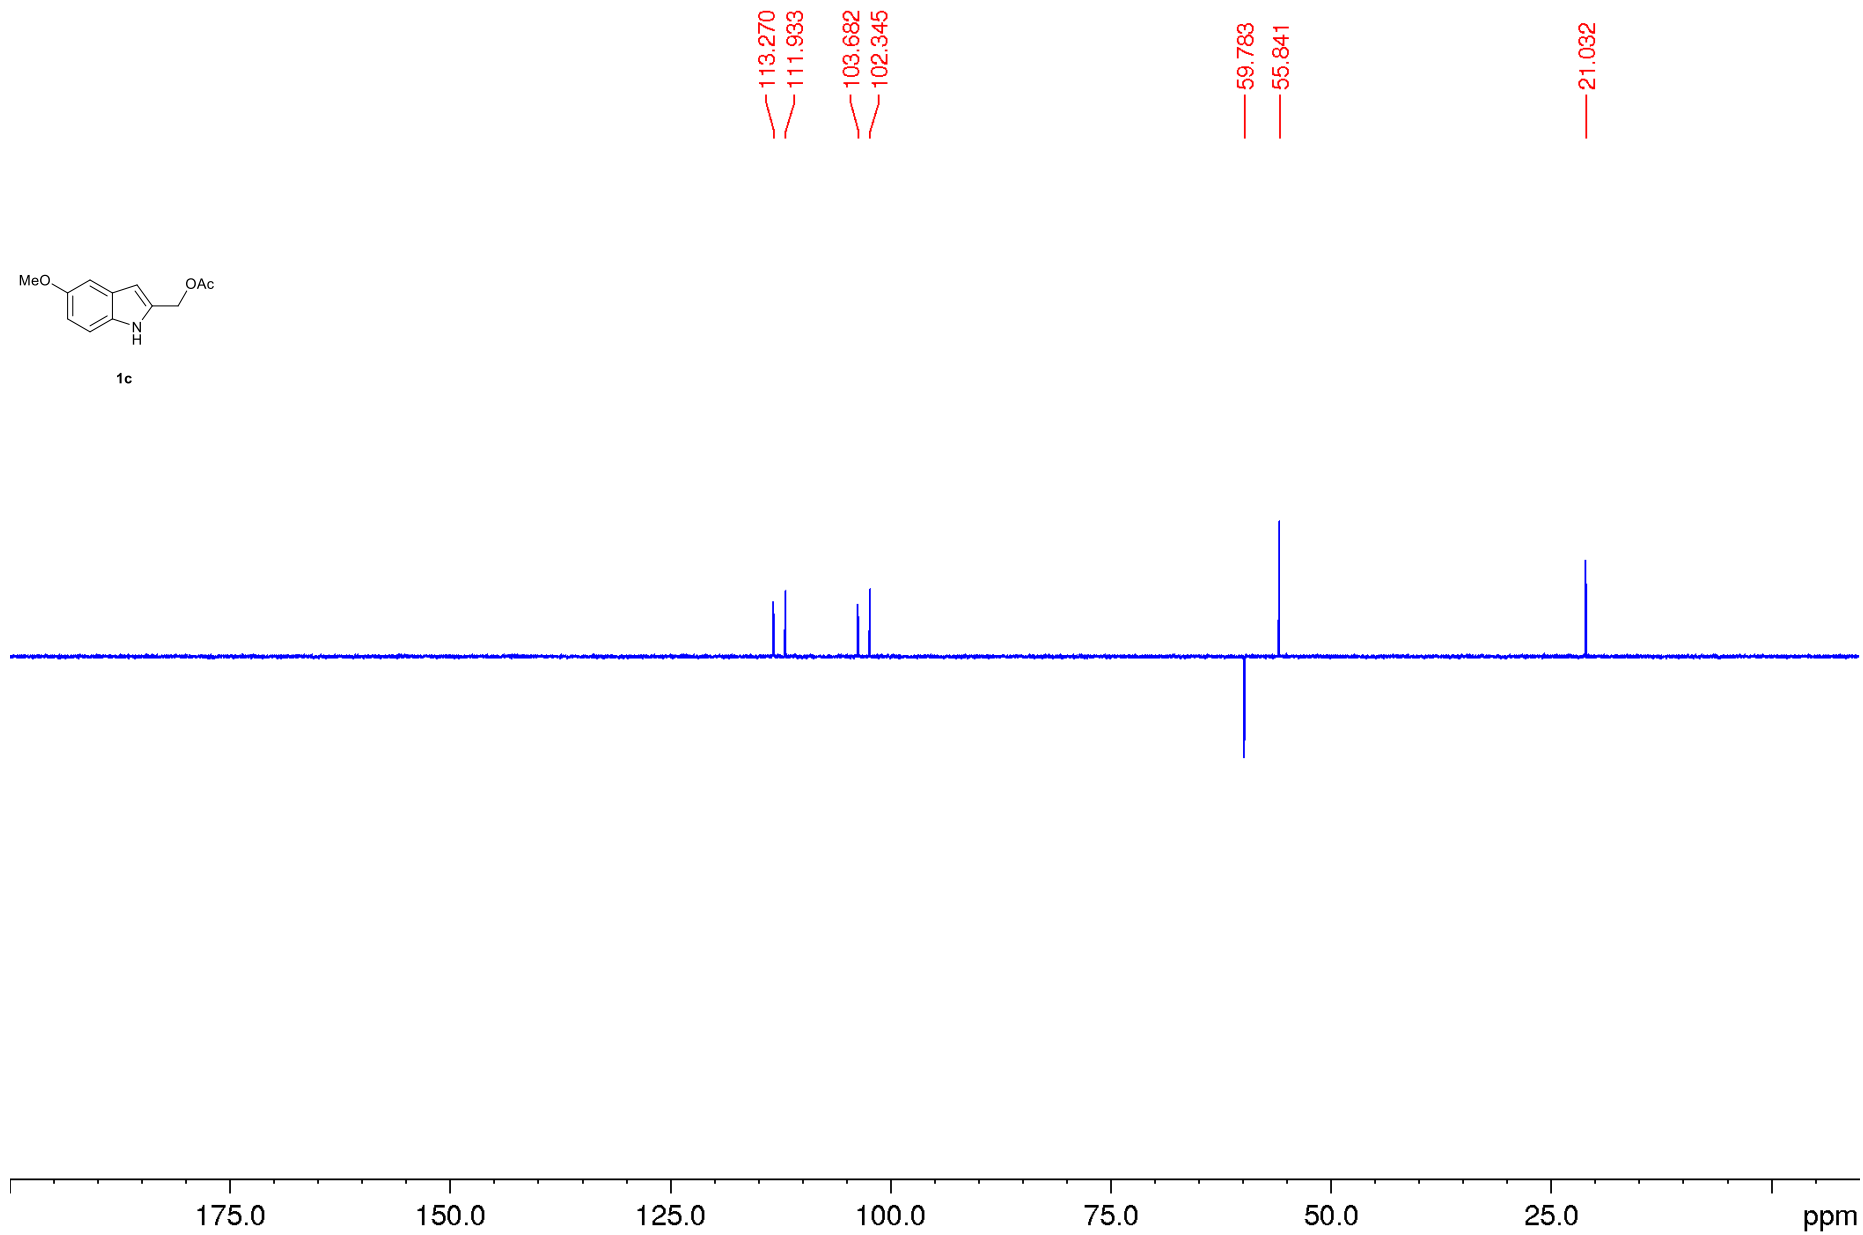

<sup>1</sup>H NMR-spectrum (400.13 MHz) (CDCl<sub>3</sub>)

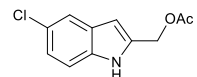

1d

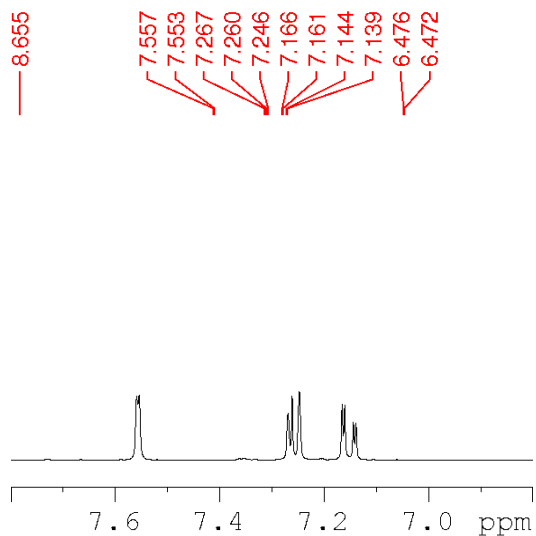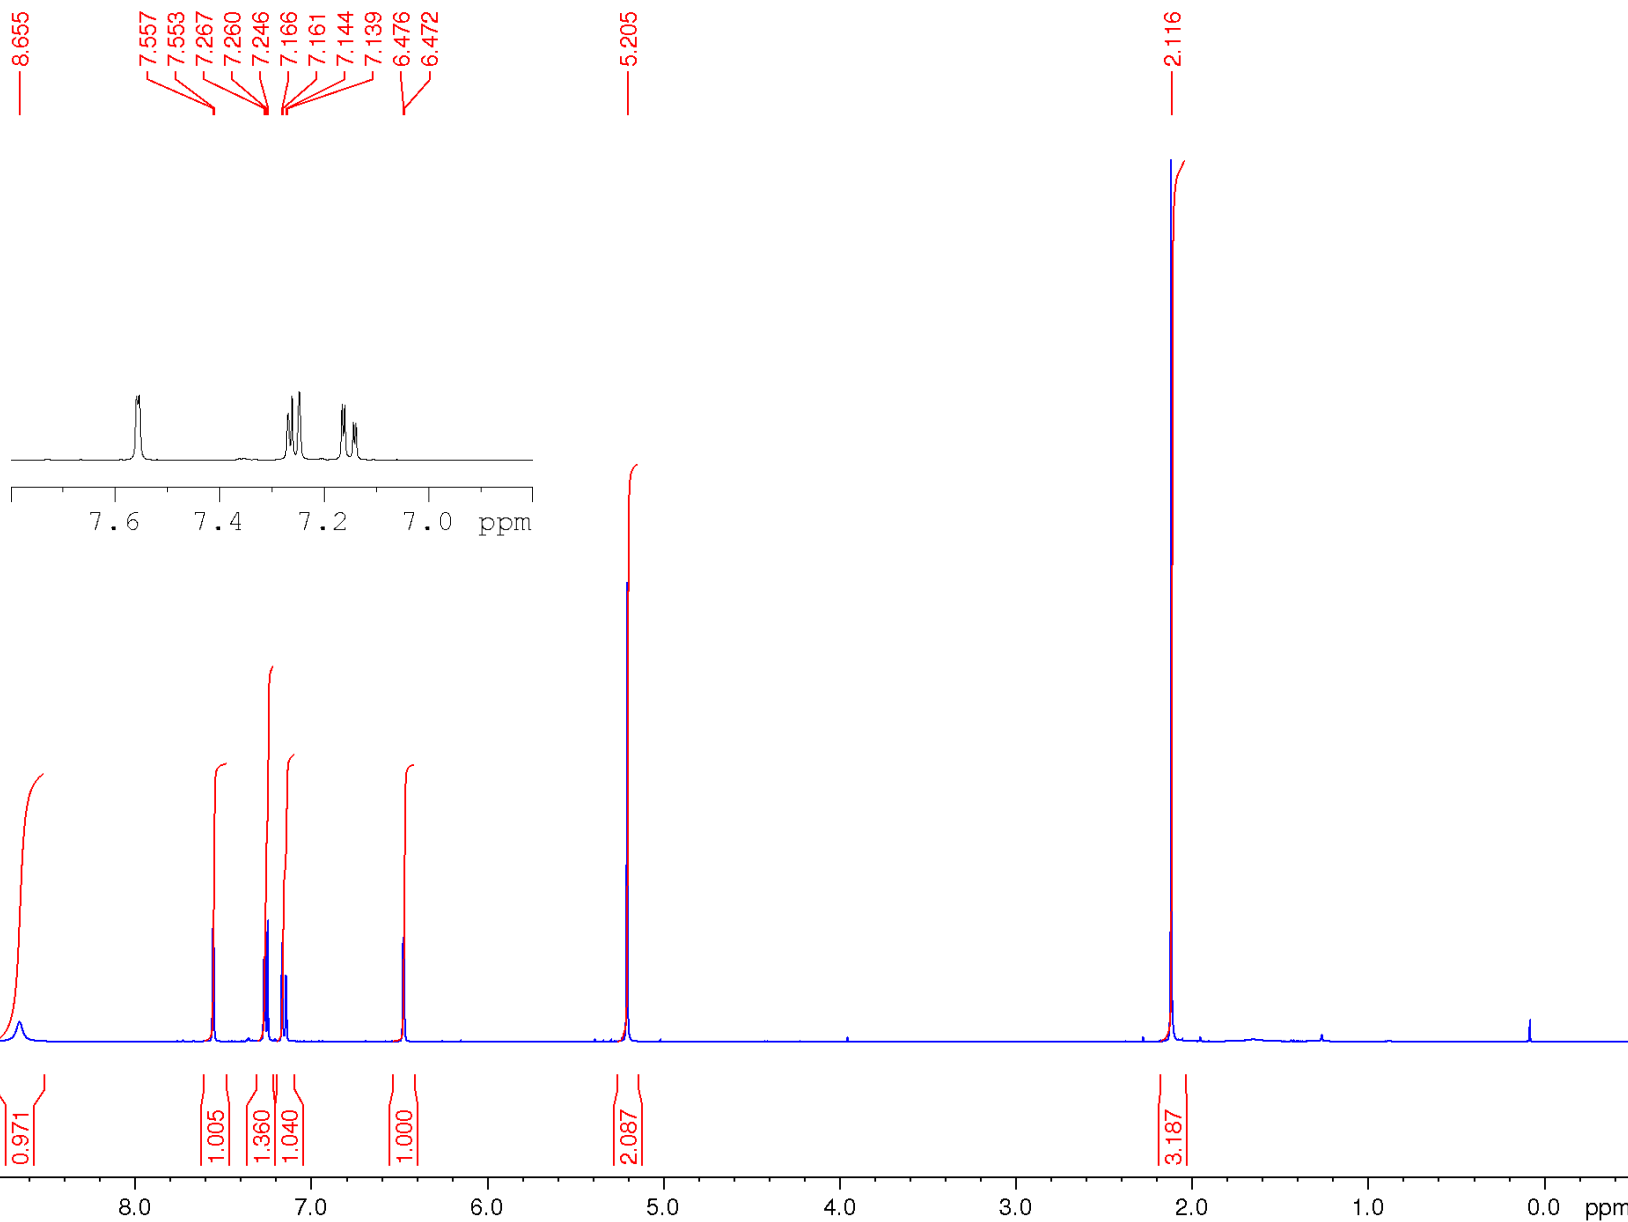

# $^{13}\text{C}$ NMR-spectrum (100.6 MHz) ( $\text{CDCl}_3$ )

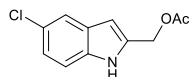

**1d**

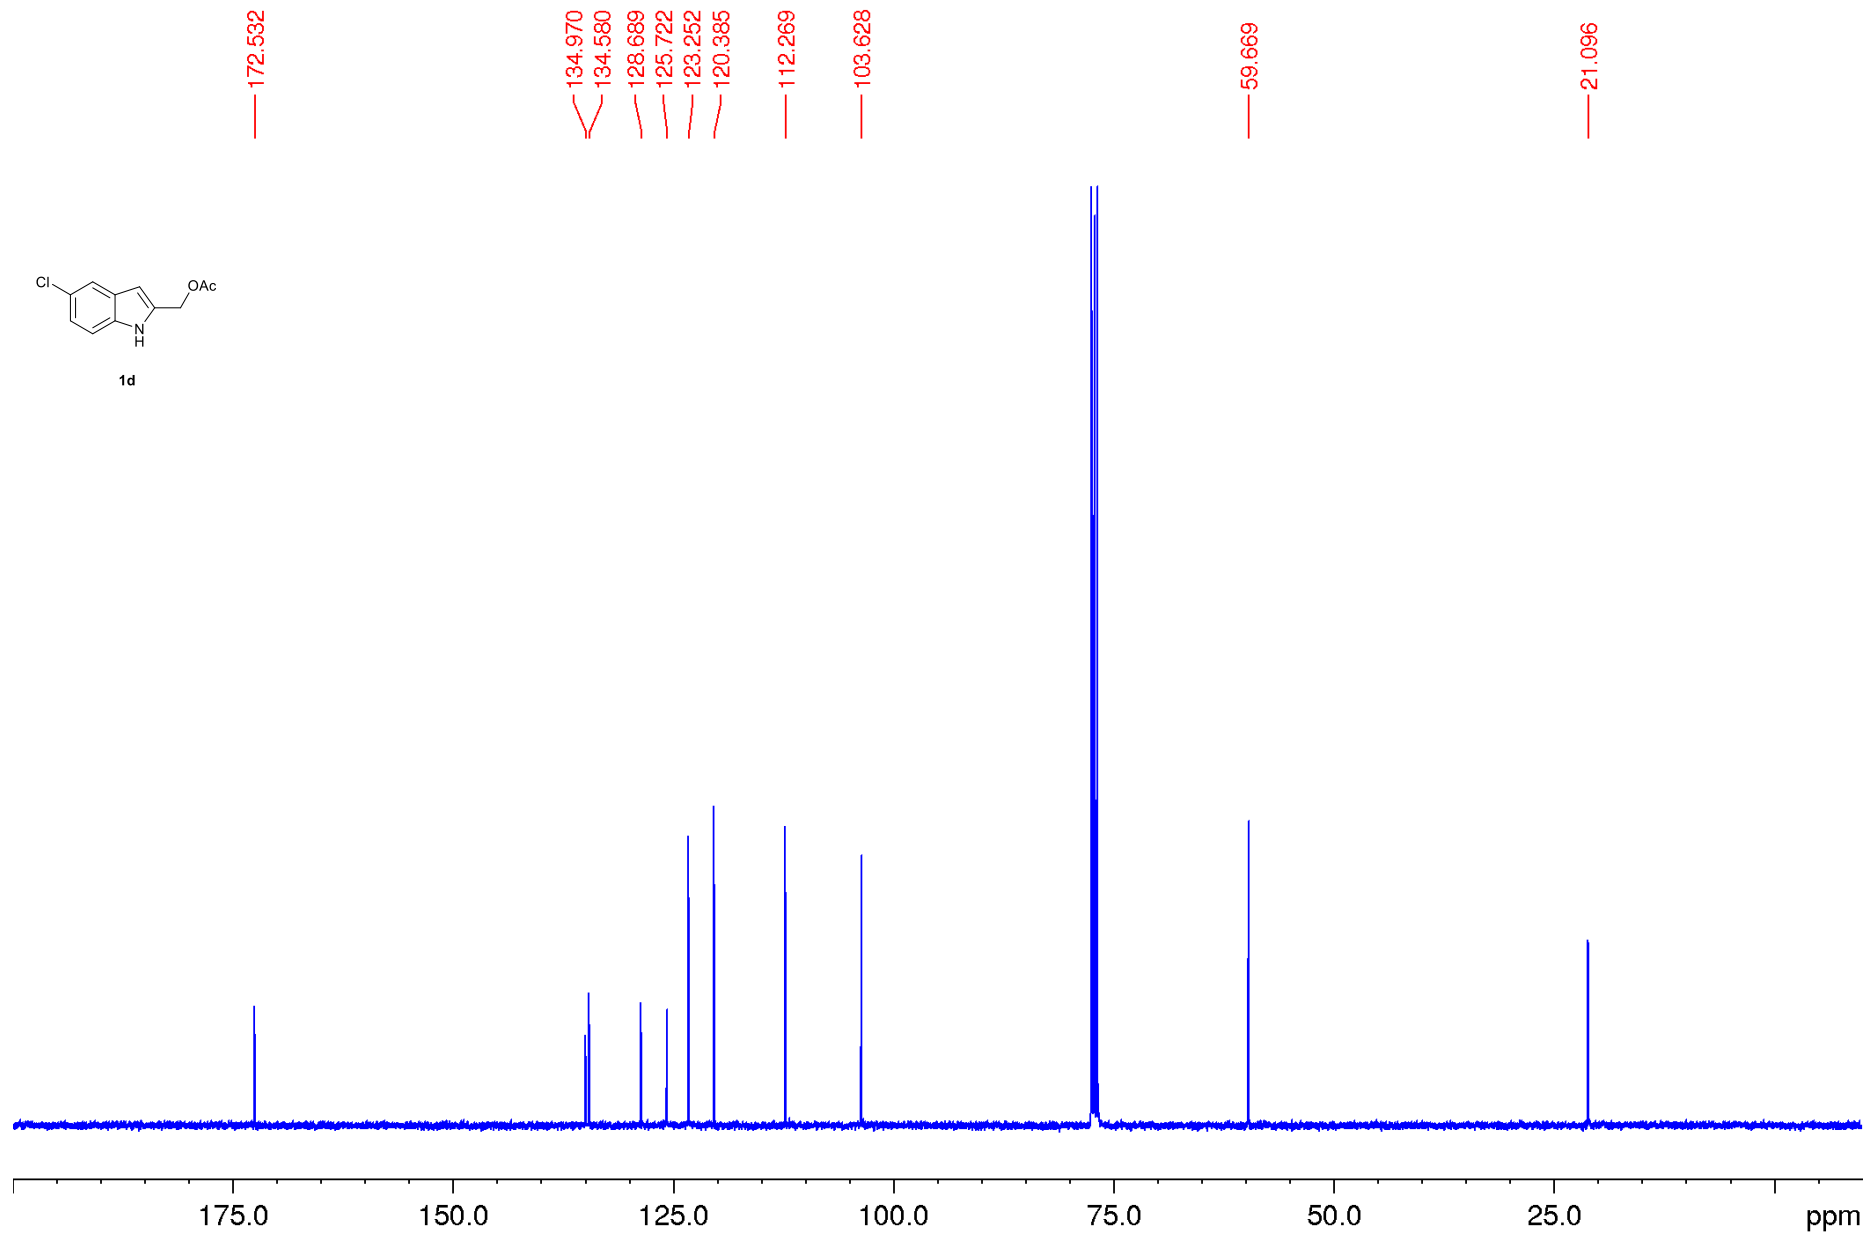

# DEPT 135 NMR-spectrum (CDCl<sub>3</sub>)

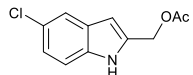

**1d**

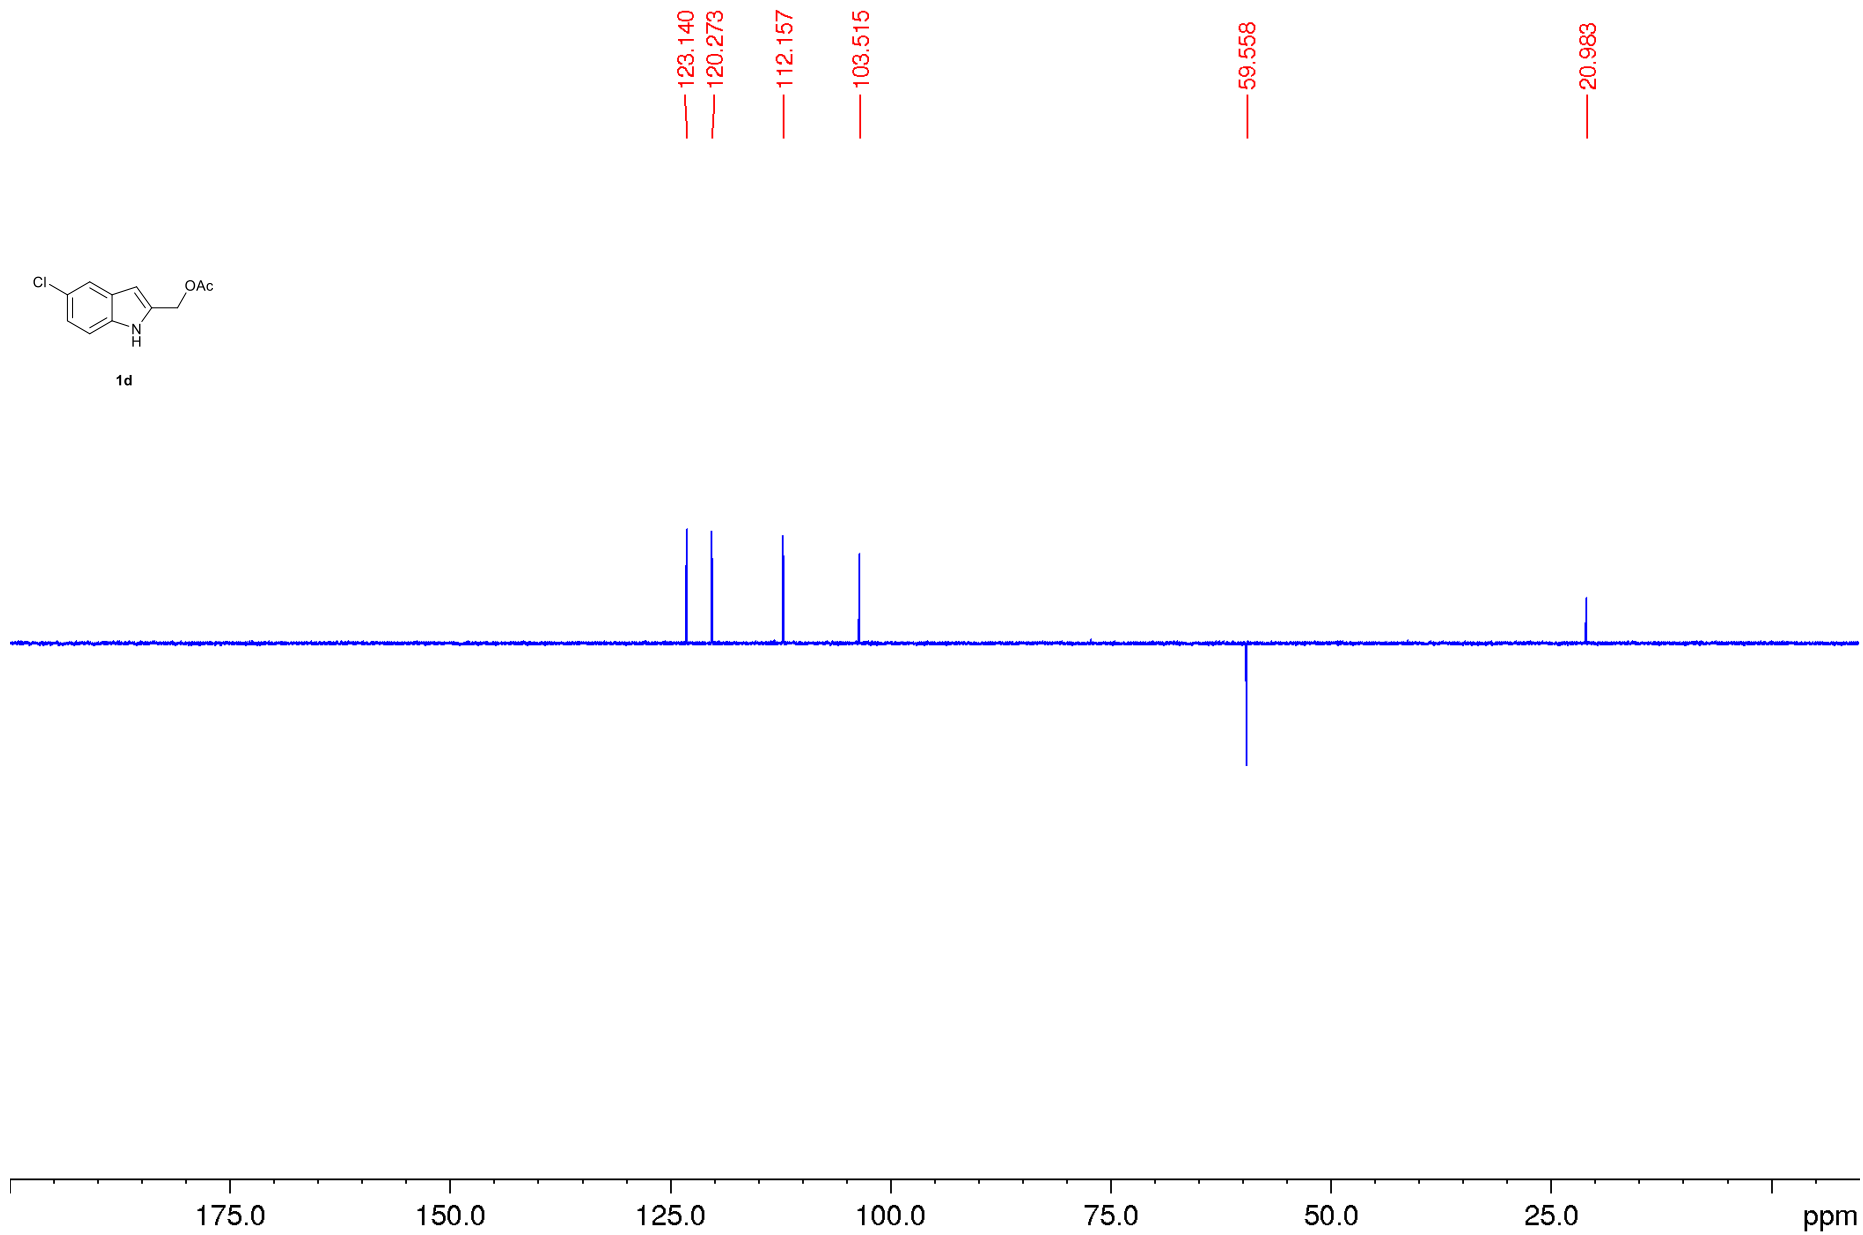

$^1\text{H}$  NMR-spectrum (400.13 MHz) ( $\text{CDCl}_3$ )

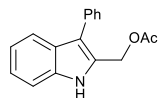

1e

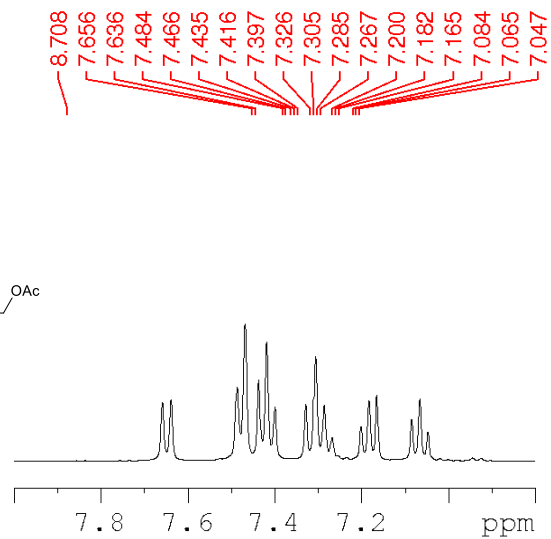

8.708  
7.656  
7.636  
7.484  
7.466  
7.435  
7.416  
7.397  
7.326  
7.305  
7.285  
7.267  
7.200  
7.182  
7.165  
7.084  
7.065  
7.047

5.194

2.062

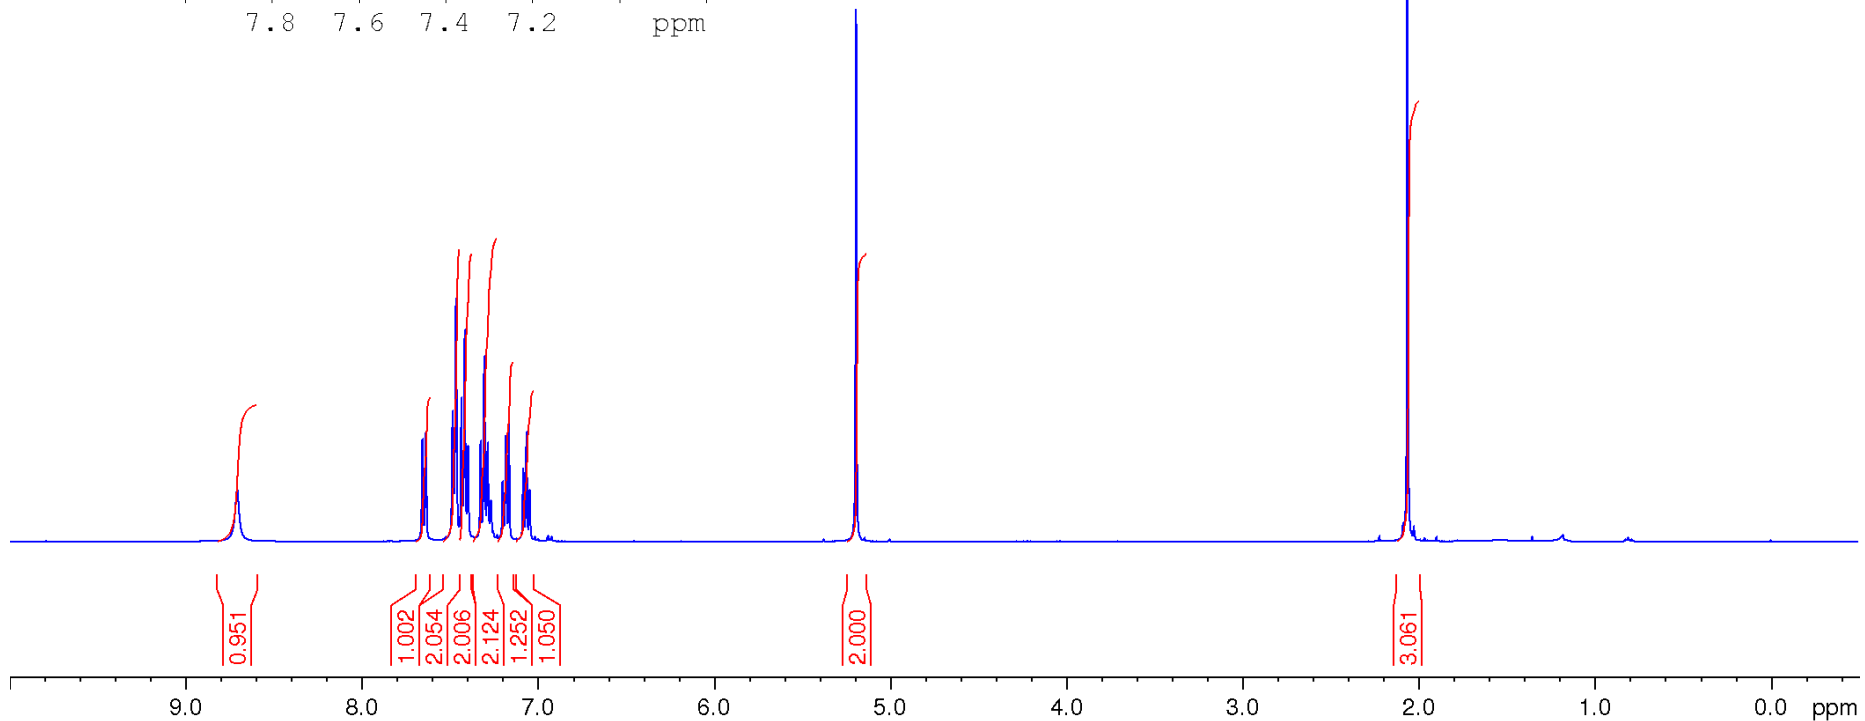

0.961

1.002

2.054

2.006

2.124

1.252

1.050

2.000

3.061



$^{13}\text{C}$  NMR-spectrum (100.6 MHz) ( $\text{CDCl}_3$ )

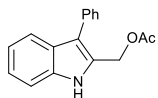

1e

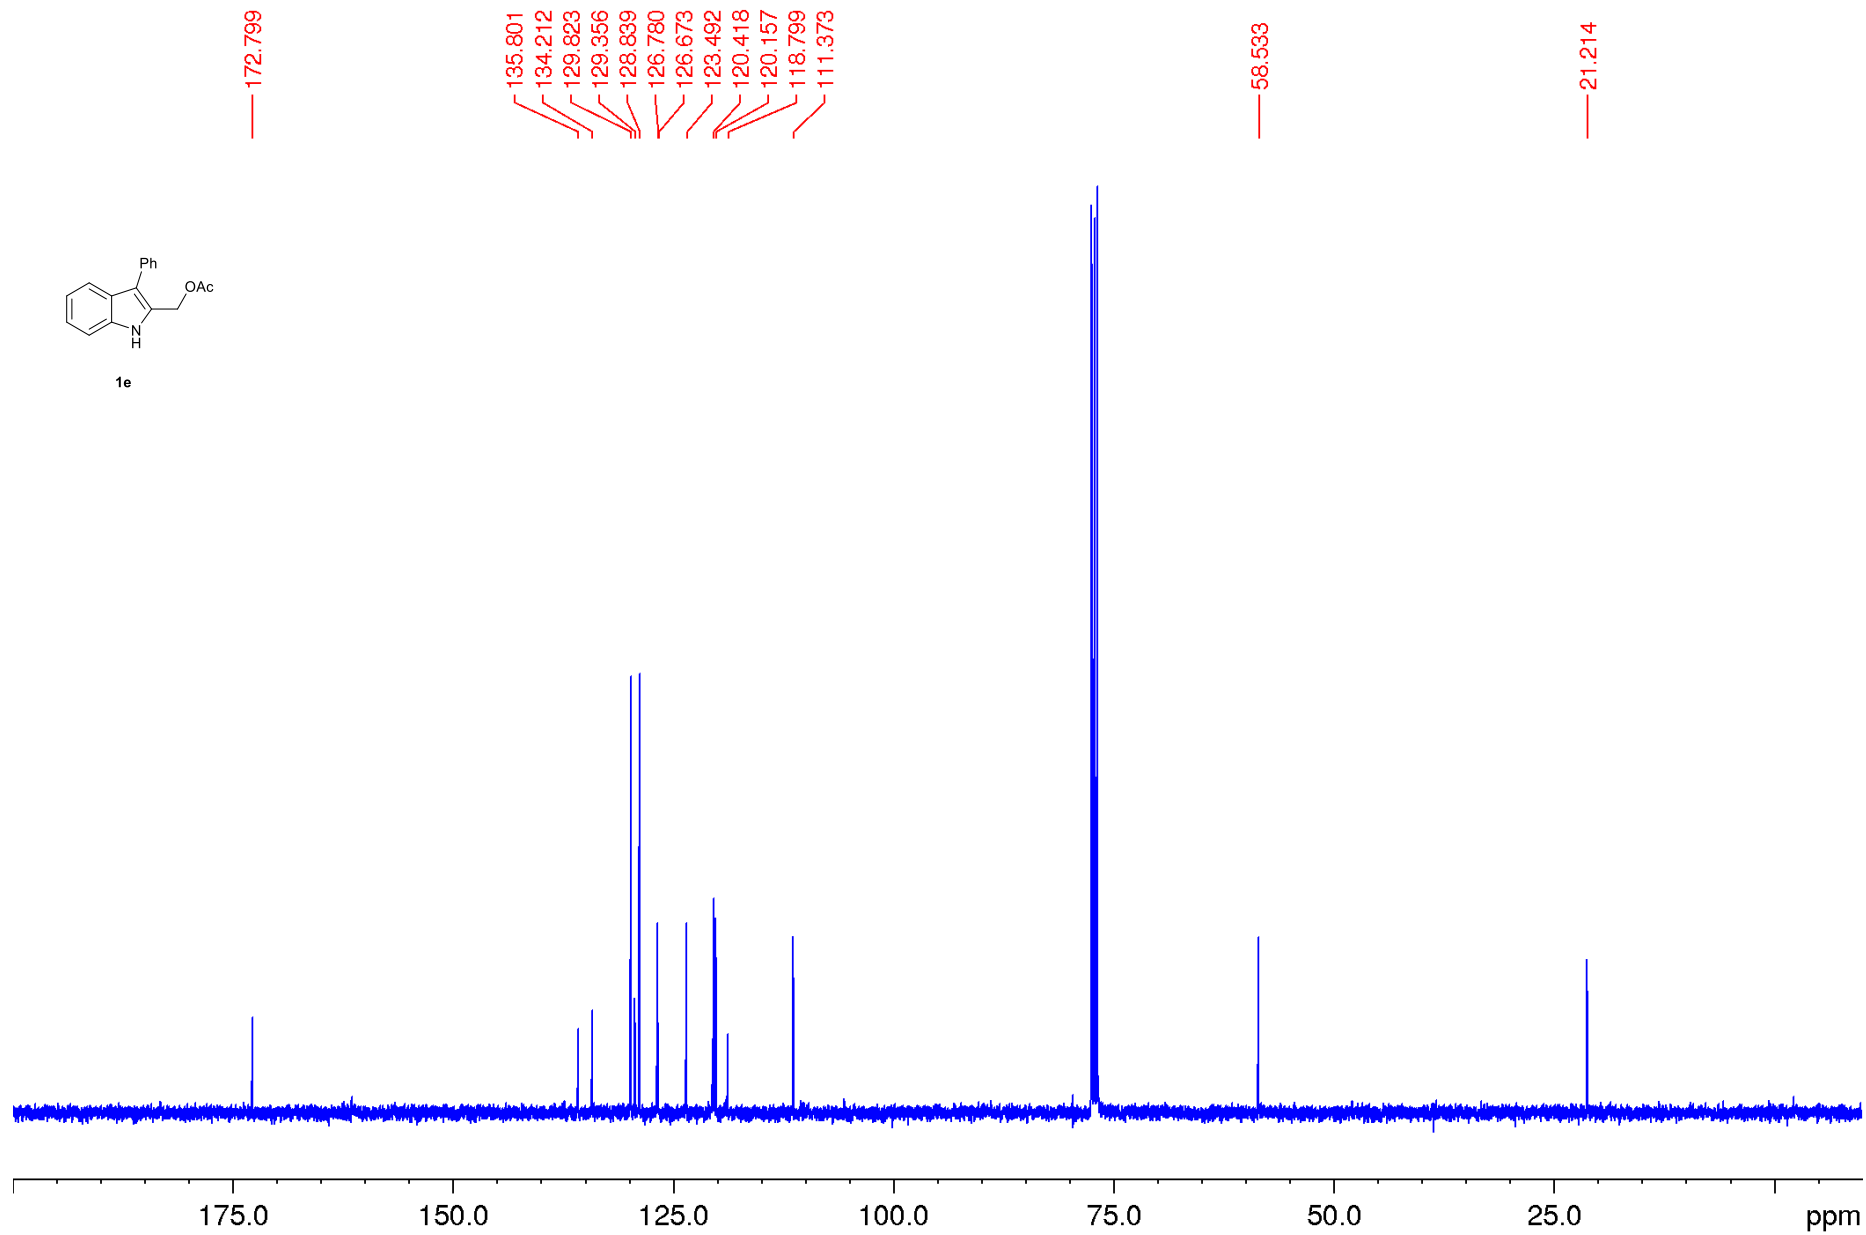

# DEPT 135 NMR-spectrum (CDCl<sub>3</sub>)

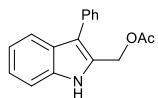

1e

129.825  
128.876  
126.792  
123.488  
120.441  
120.157  
111.452

58.531

21.178

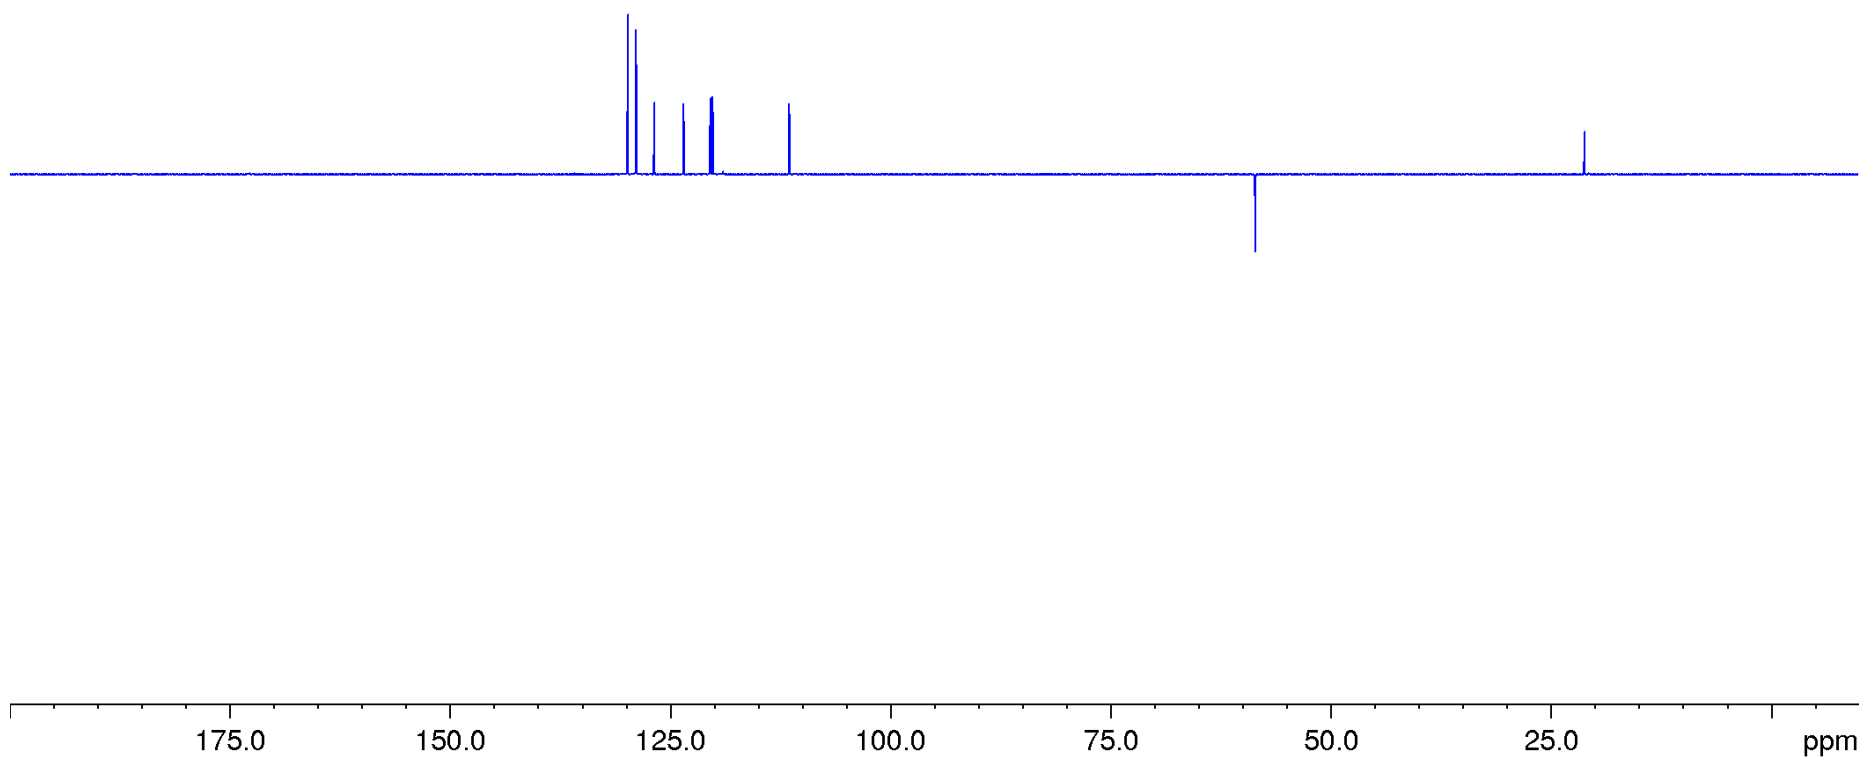

<sup>1</sup>H NMR-spectrum (400.13 MHz) (CDCl<sub>3</sub>)

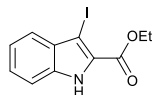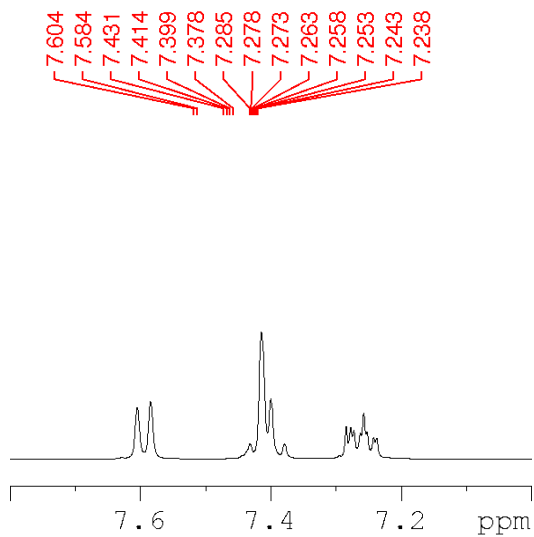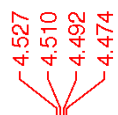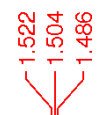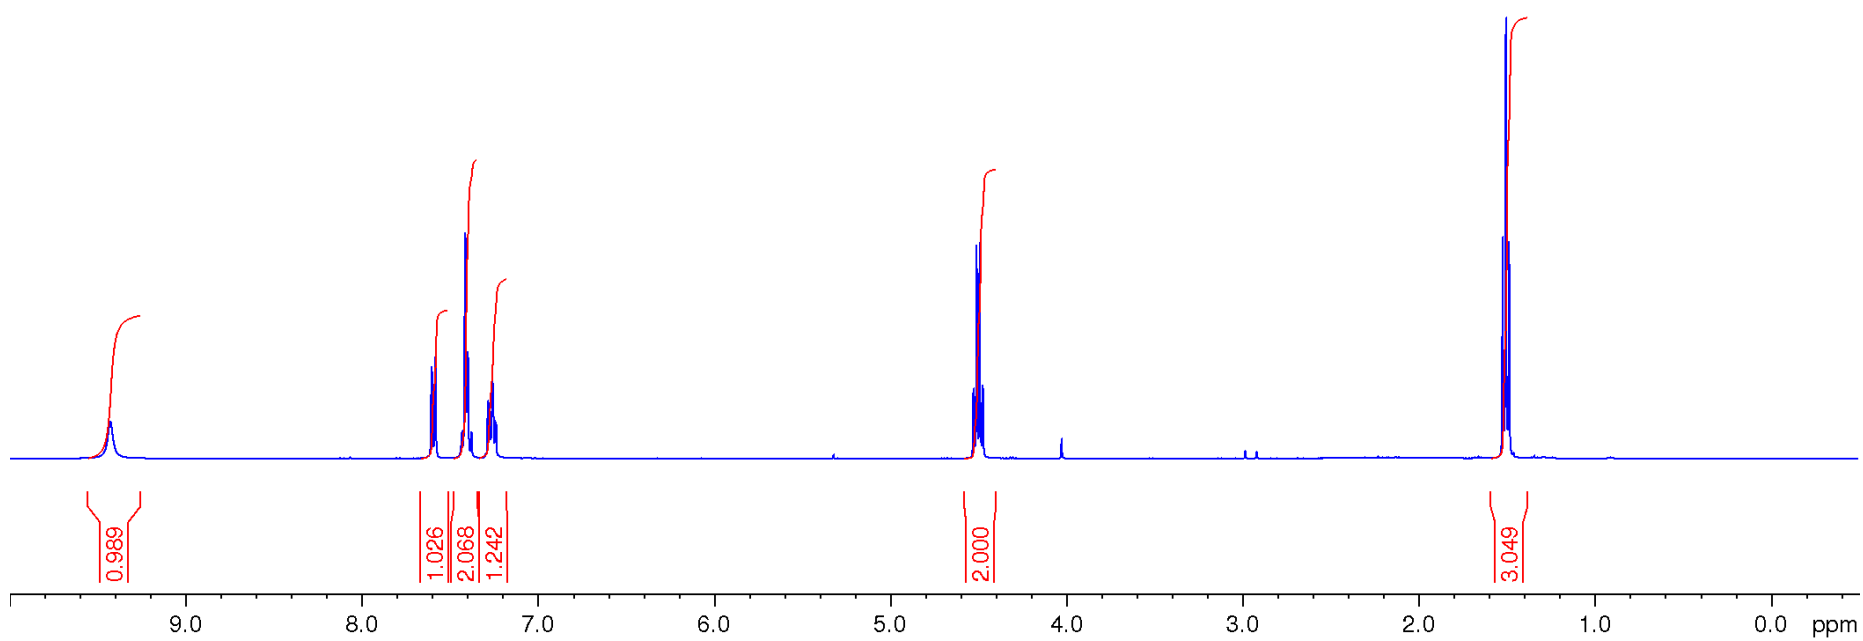

$^{13}\text{C}$  NMR-spectrum (100.6 MHz) ( $\text{CDCl}_3$ )

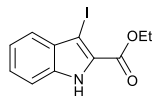

161.148

136.306

131.584

127.257

126.726

123.646

121.762

112.159

66.246

61.686

14.469

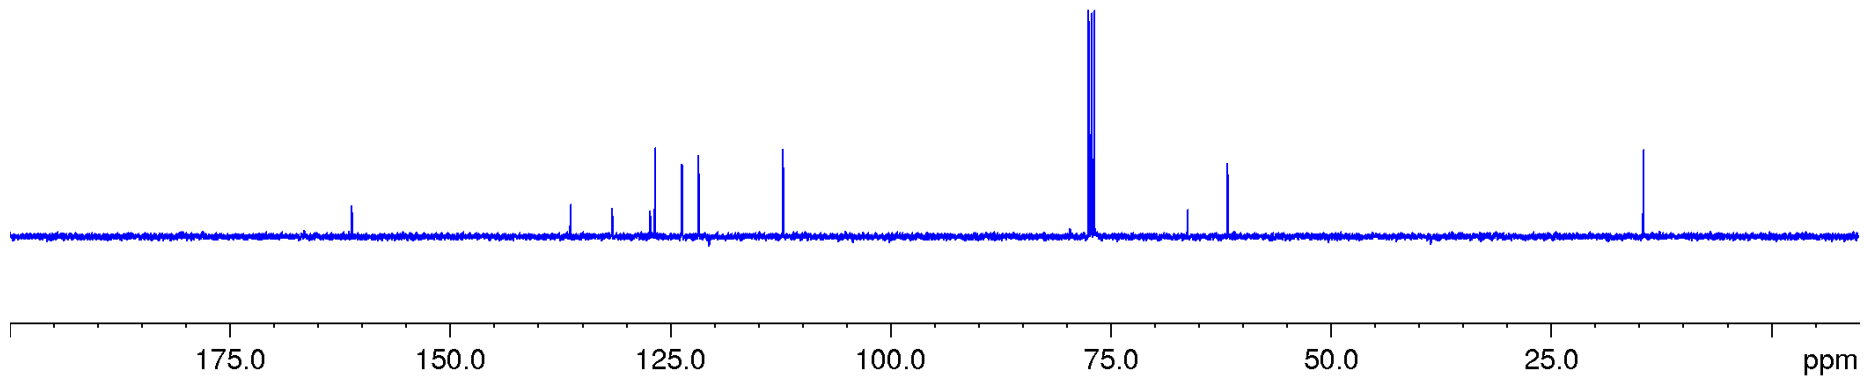

# DEPT 135 NMR-spectrum (CDCl<sub>3</sub>)

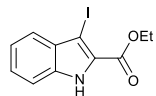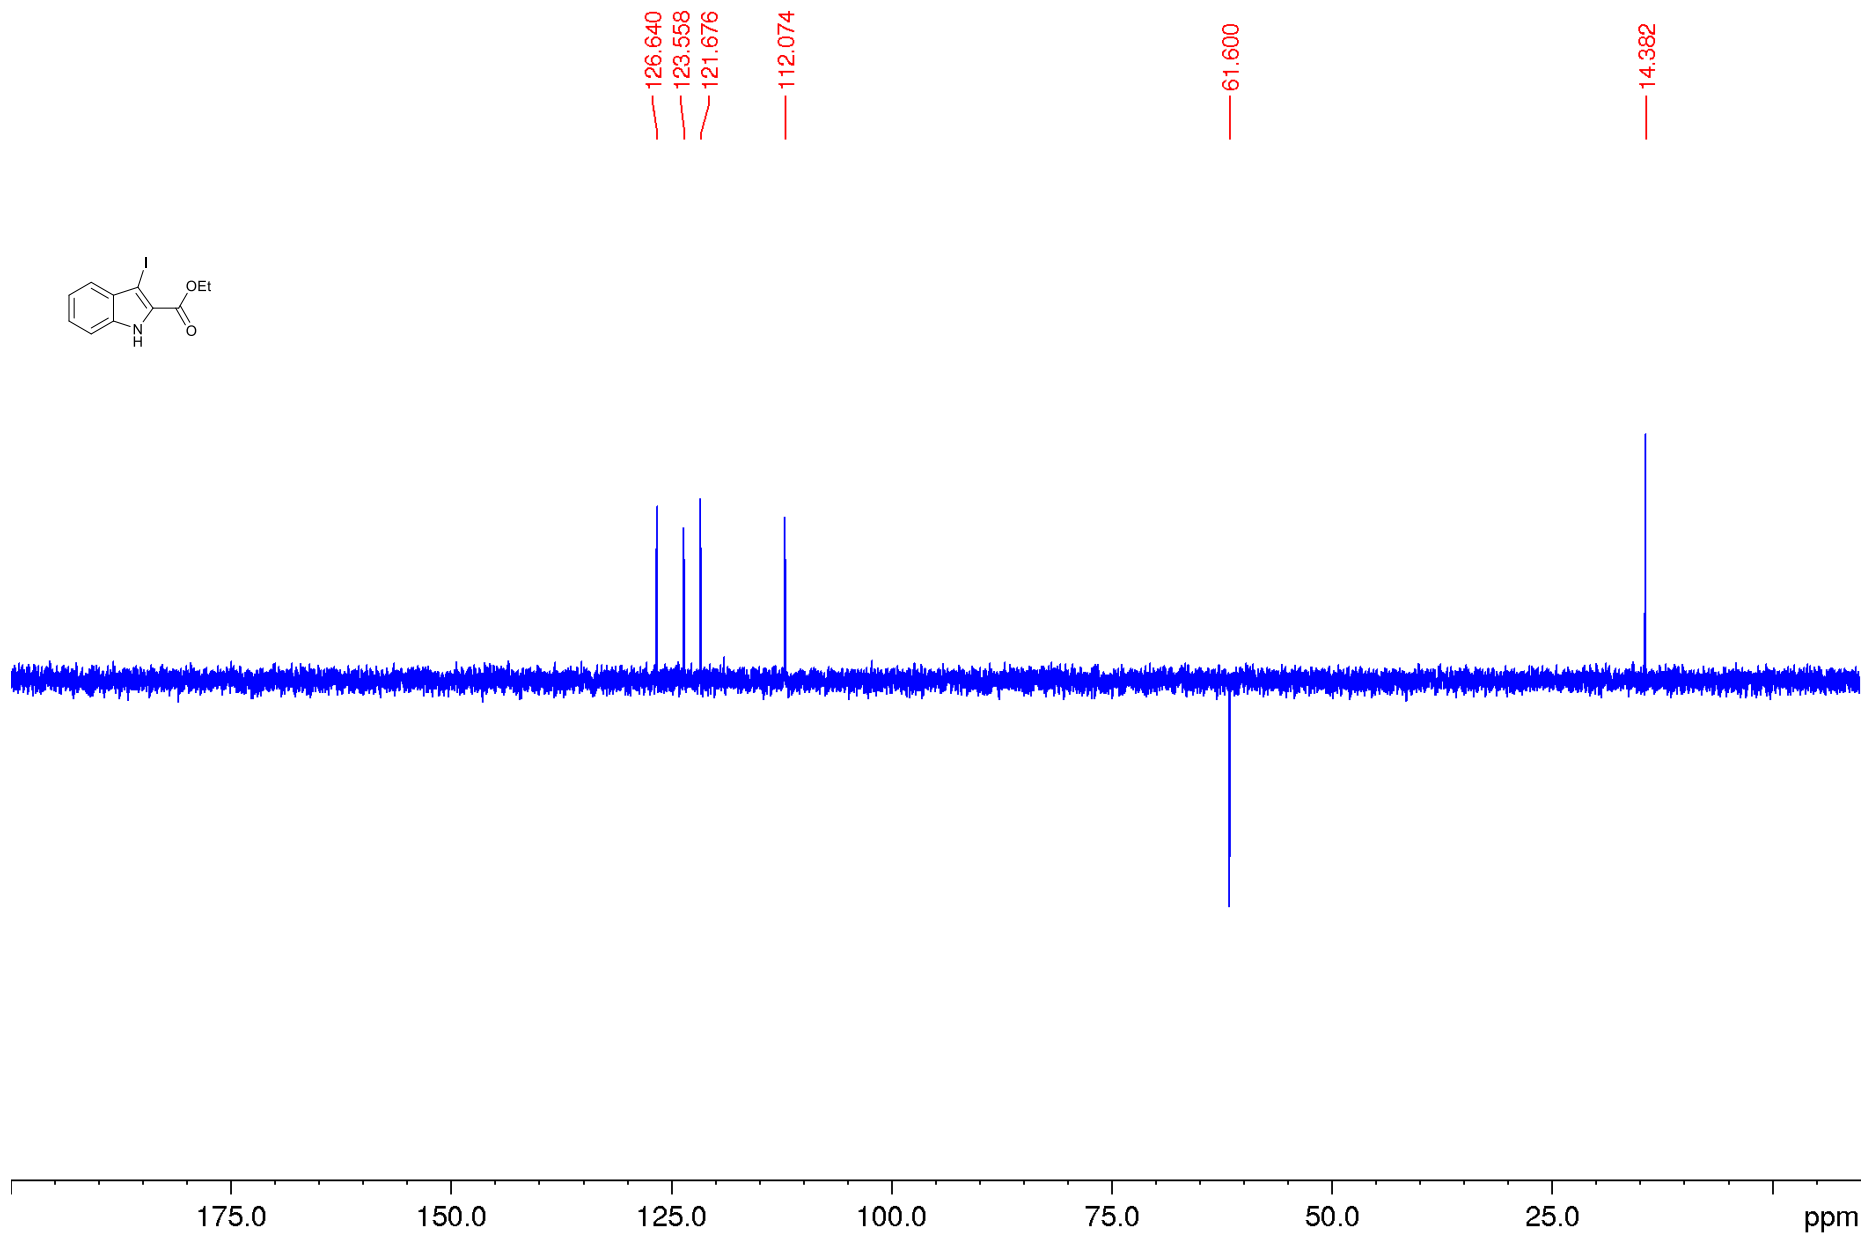

# <sup>1</sup>H NMR-spectrum (400.13 MHz) (CDCl<sub>3</sub>)

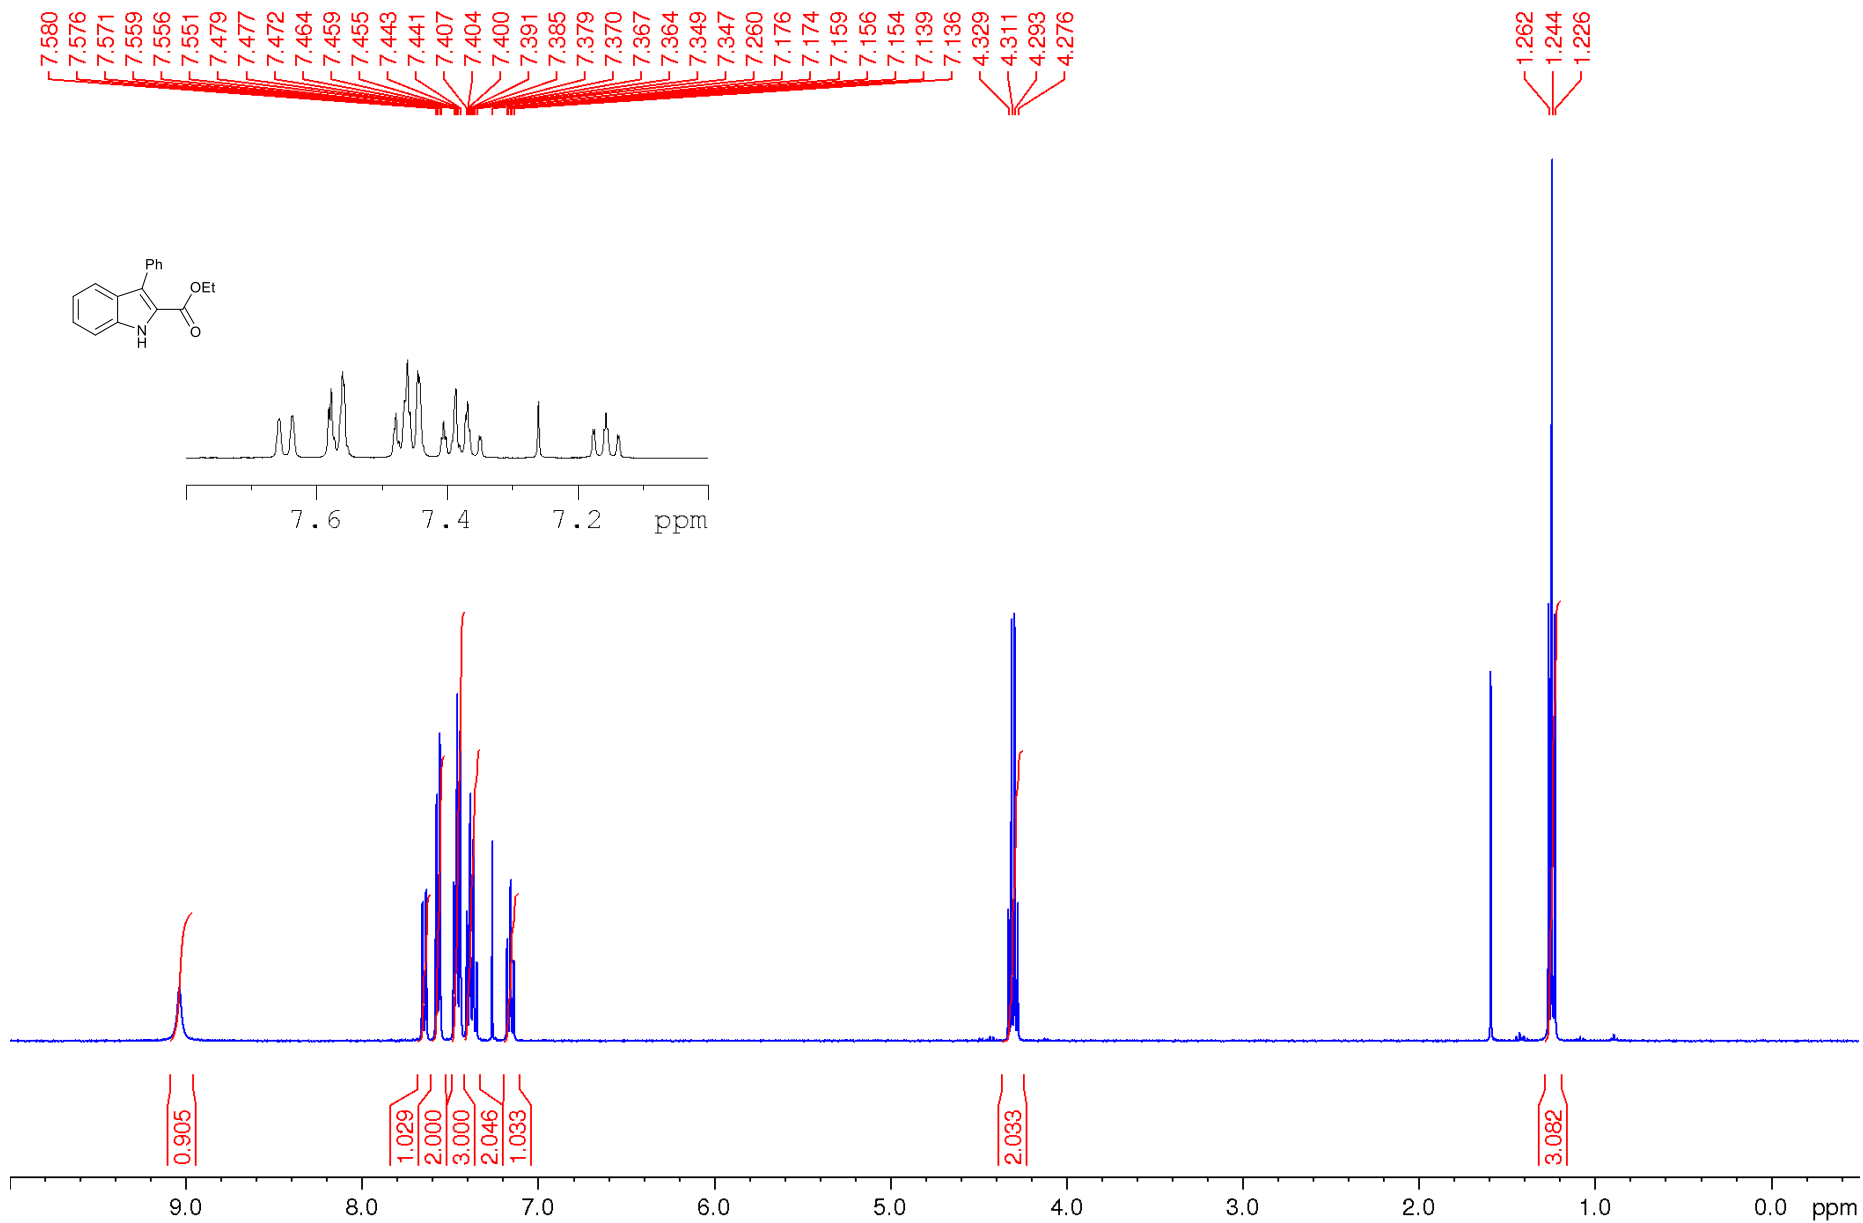

<sup>13</sup>C NMR-spectrum (100.6 MHz) (CDCl<sub>3</sub>)

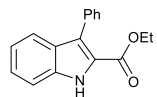

162.135  
135.820  
133.626  
130.788  
128.096  
127.887  
127.347  
125.998  
124.401  
122.929  
121.908  
121.005  
111.810

61.026

14.197

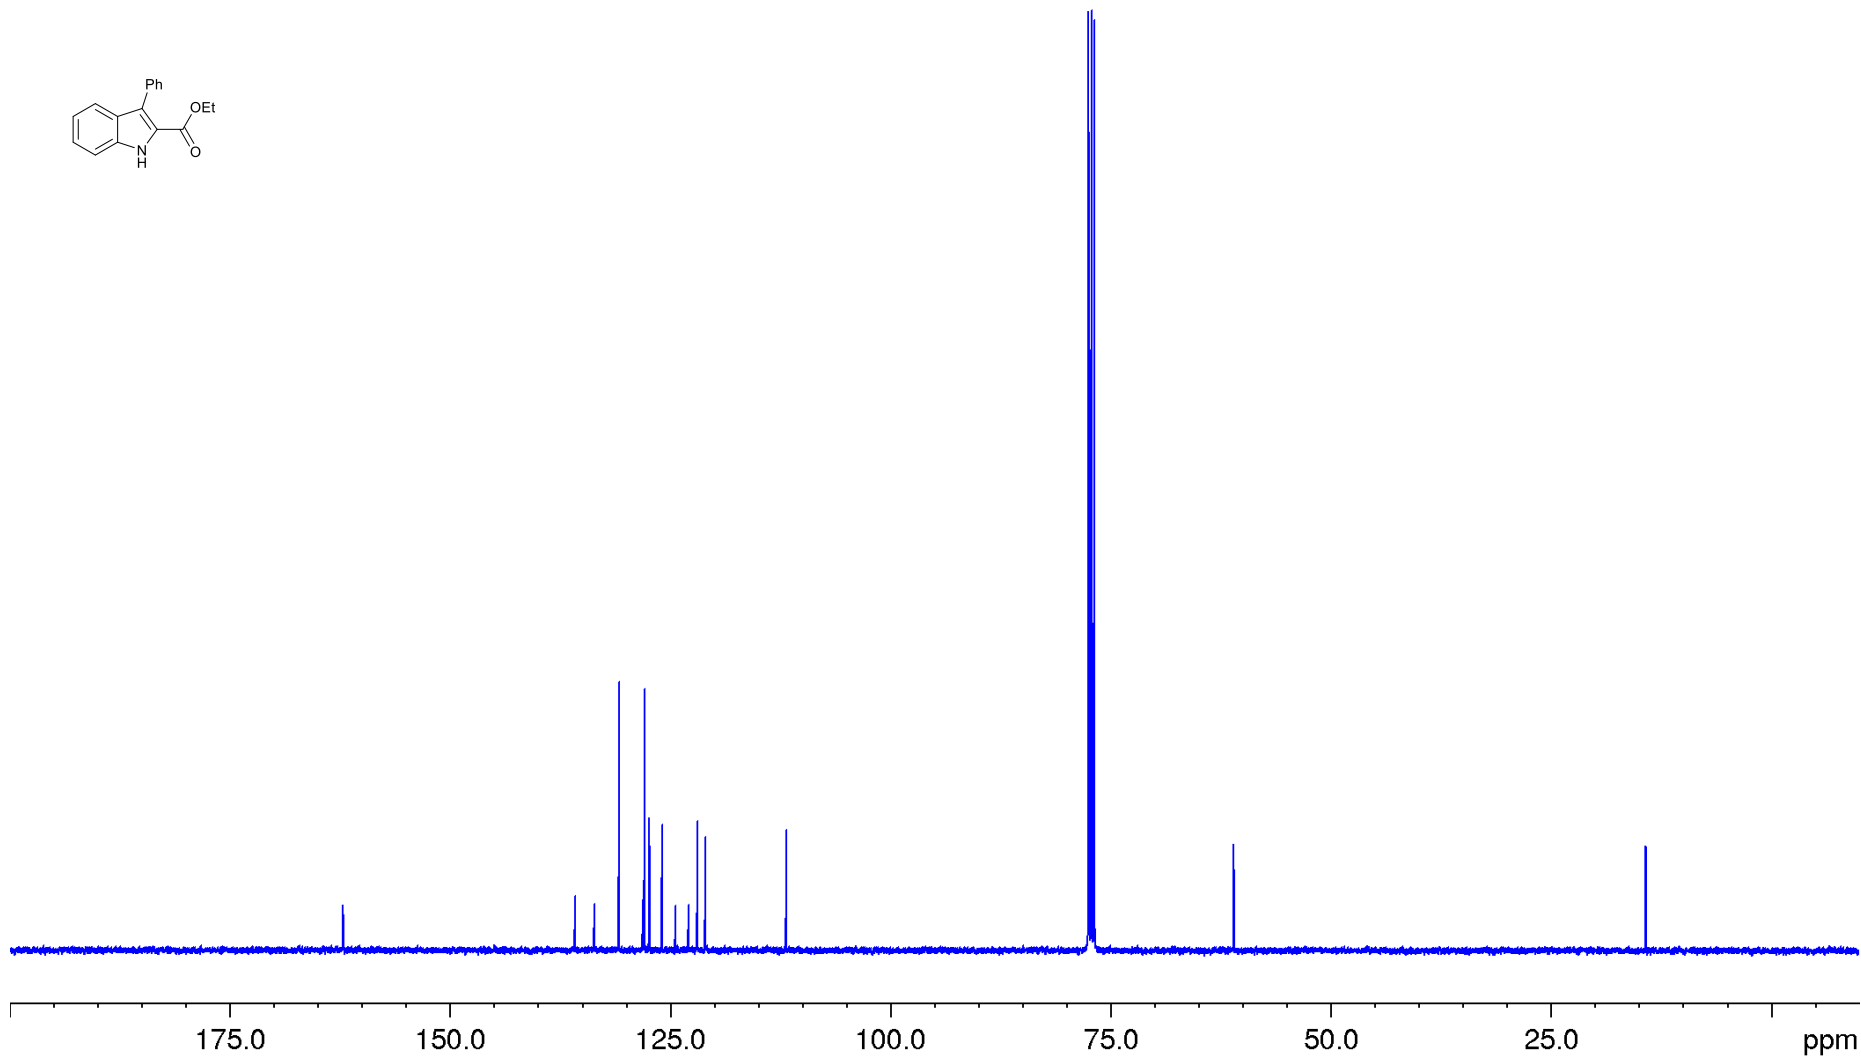

# DEPT 135 NMR-spectrum (CDCl<sub>3</sub>)

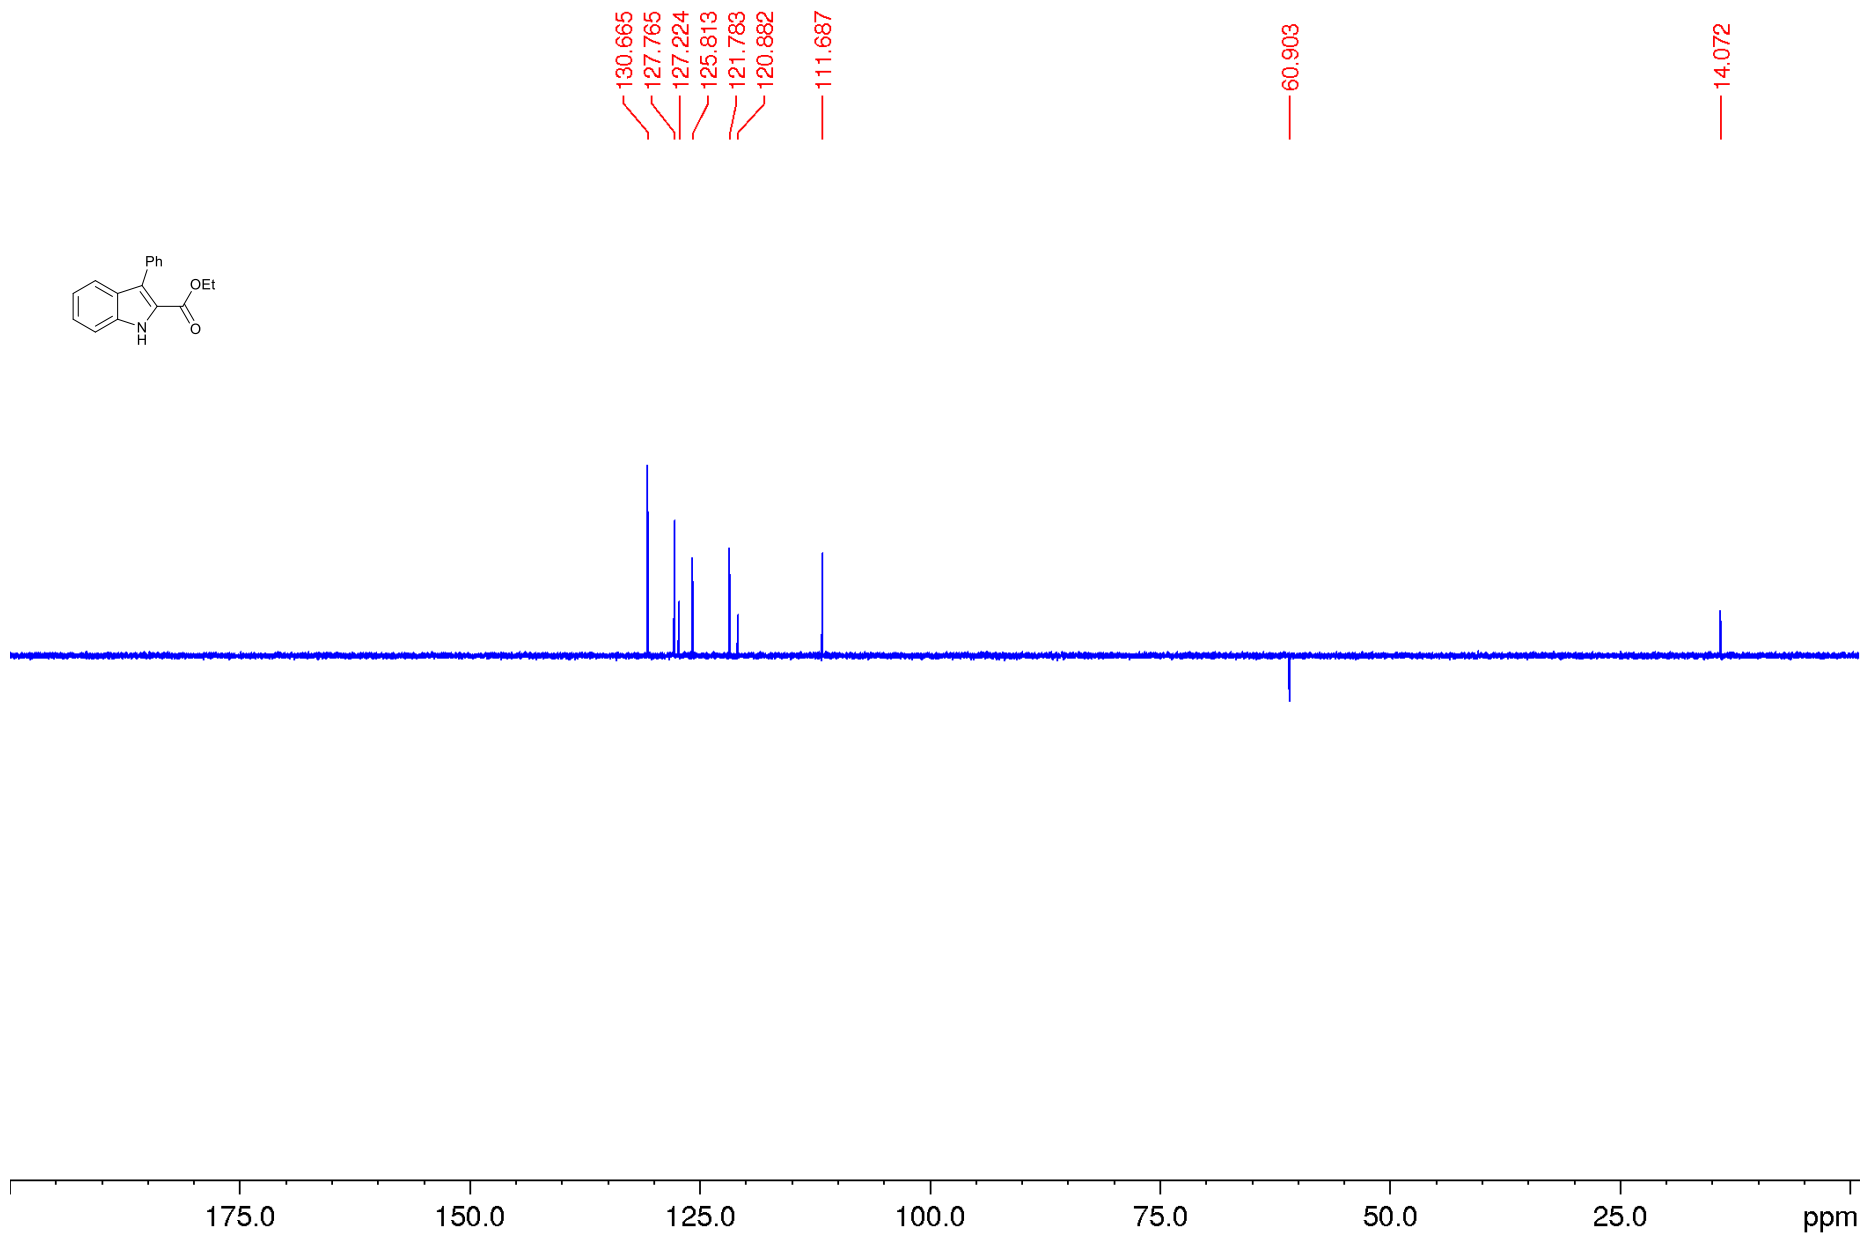



$^1\text{H}$  NMR-spectrum (400.13 MHz) ( $\text{CDCl}_3$ )

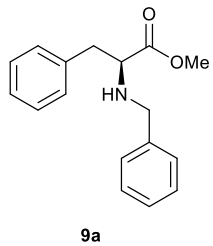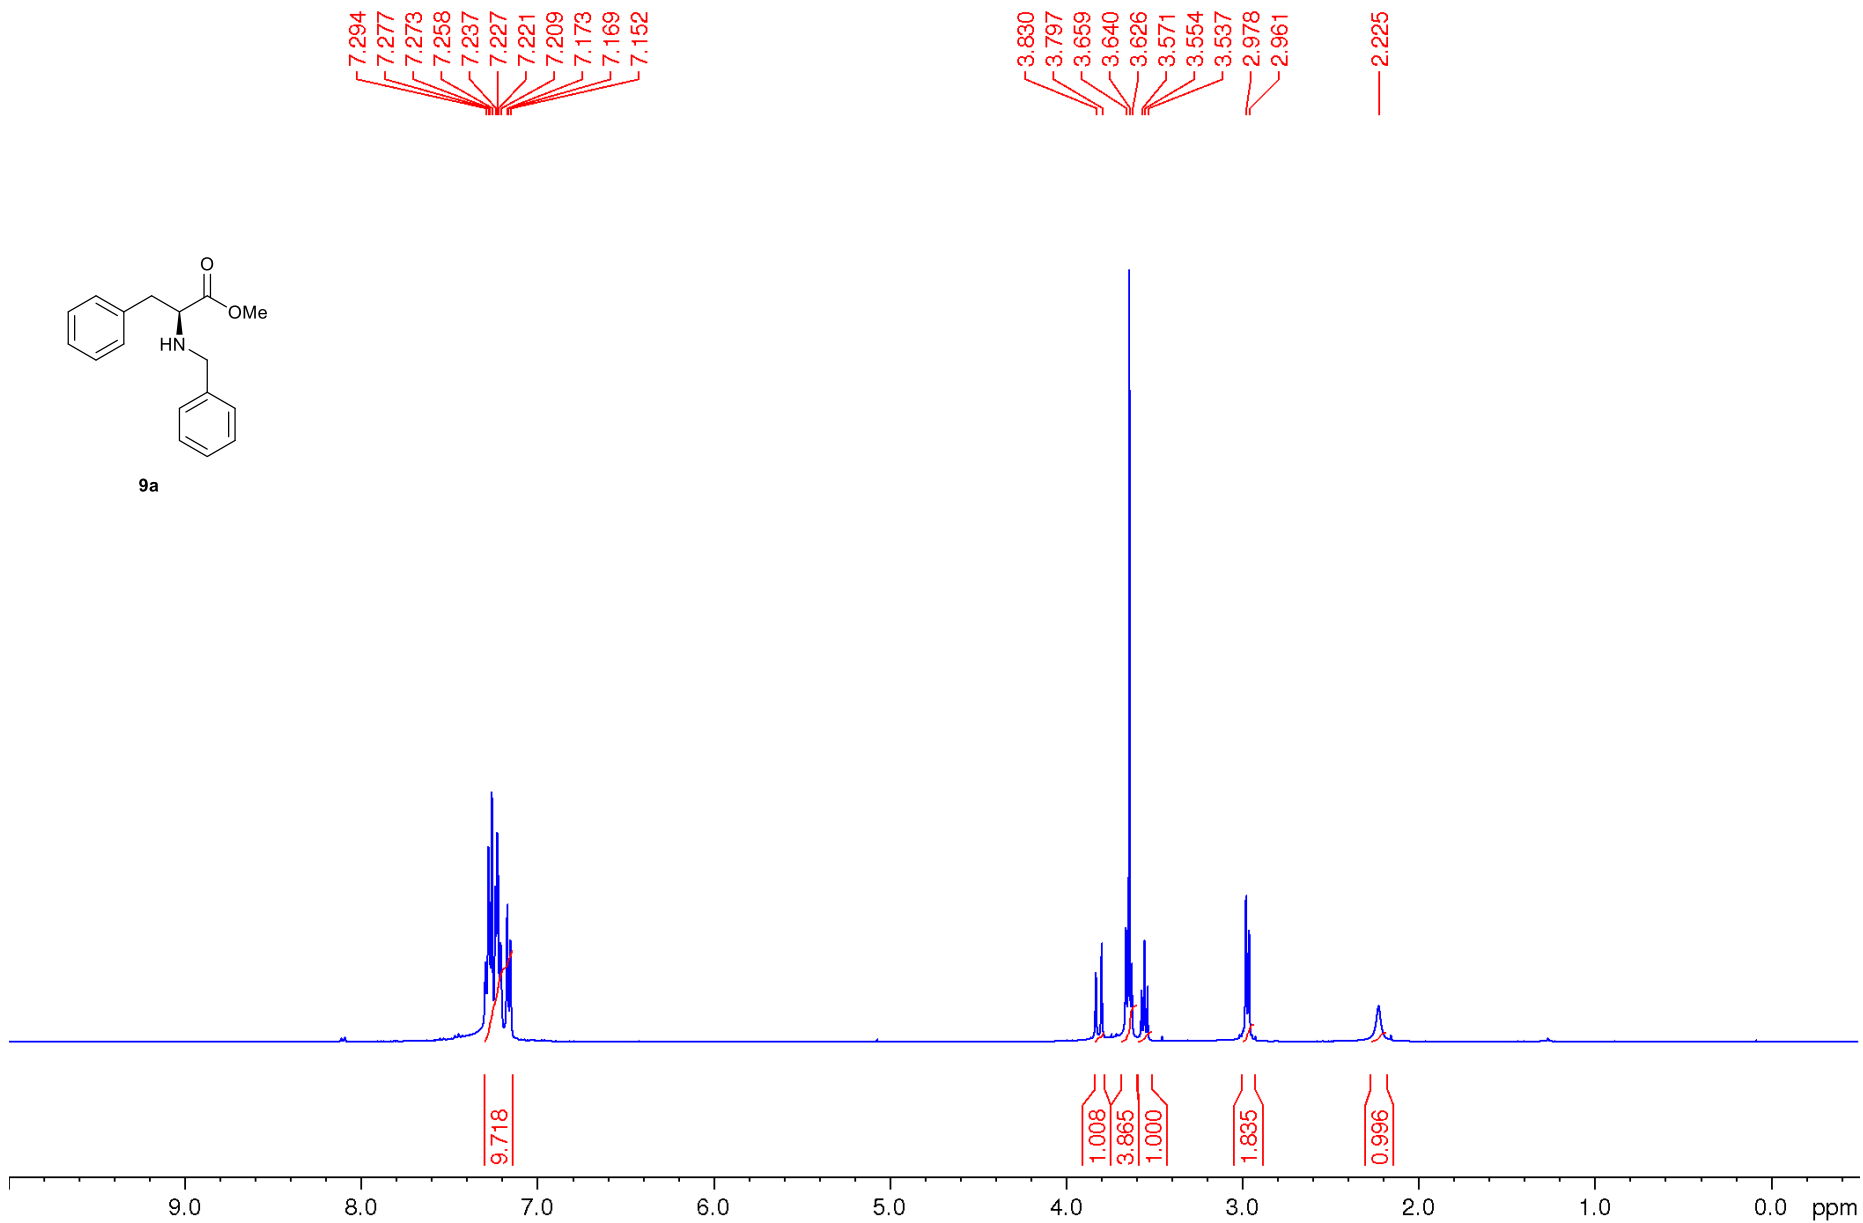

$^{13}\text{C}$  NMR-spectrum (100.6 MHz) ( $\text{CDCl}_3$ )

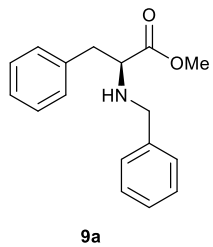

175.070

139.572

137.348

129.304

128.478

128.434

128.231

127.131

126.783

62.107

52.053

51.739

39.781

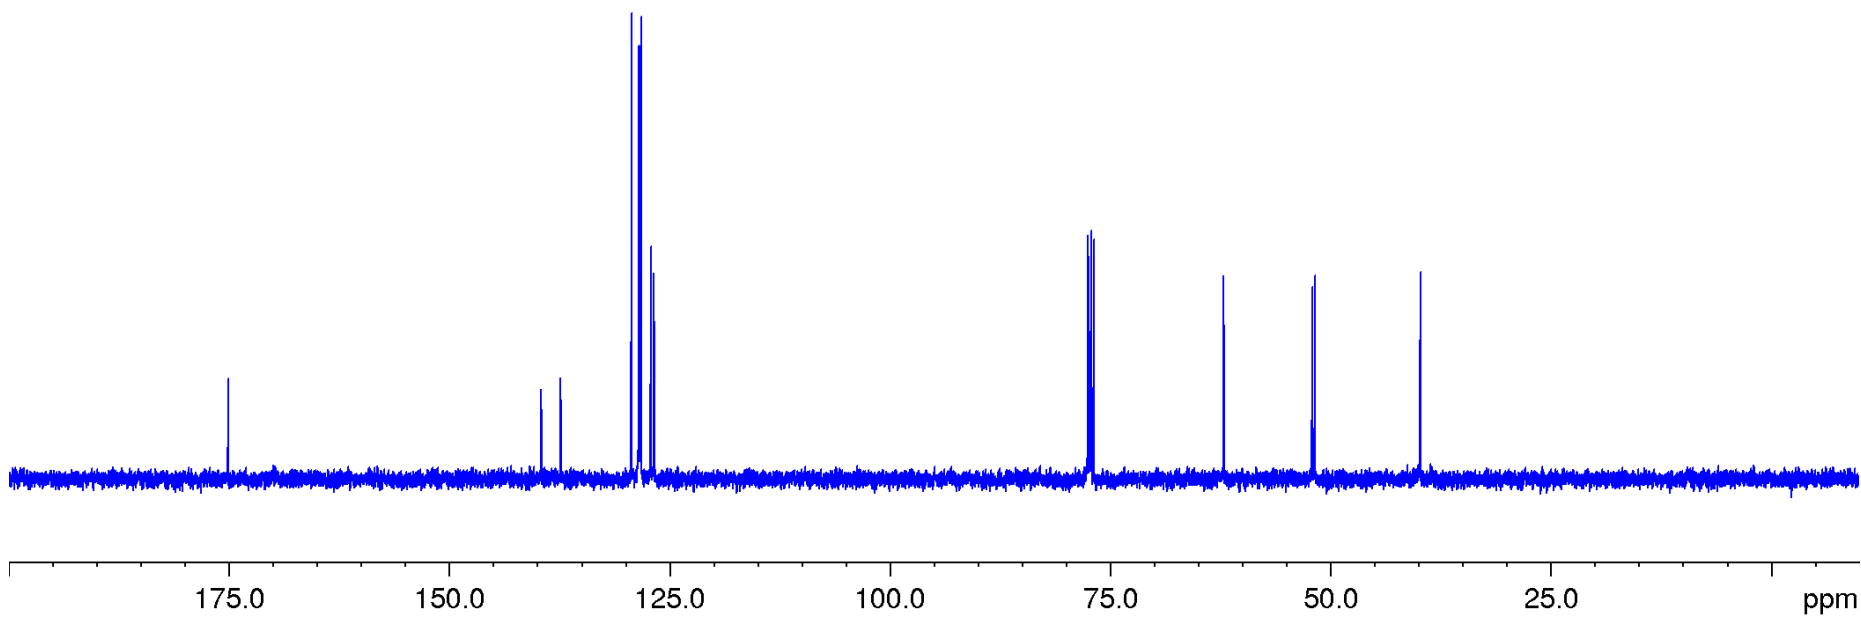

# DEPT 135 NMR-spectrum (CDCl<sub>3</sub>)

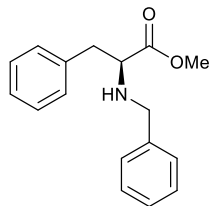

9a

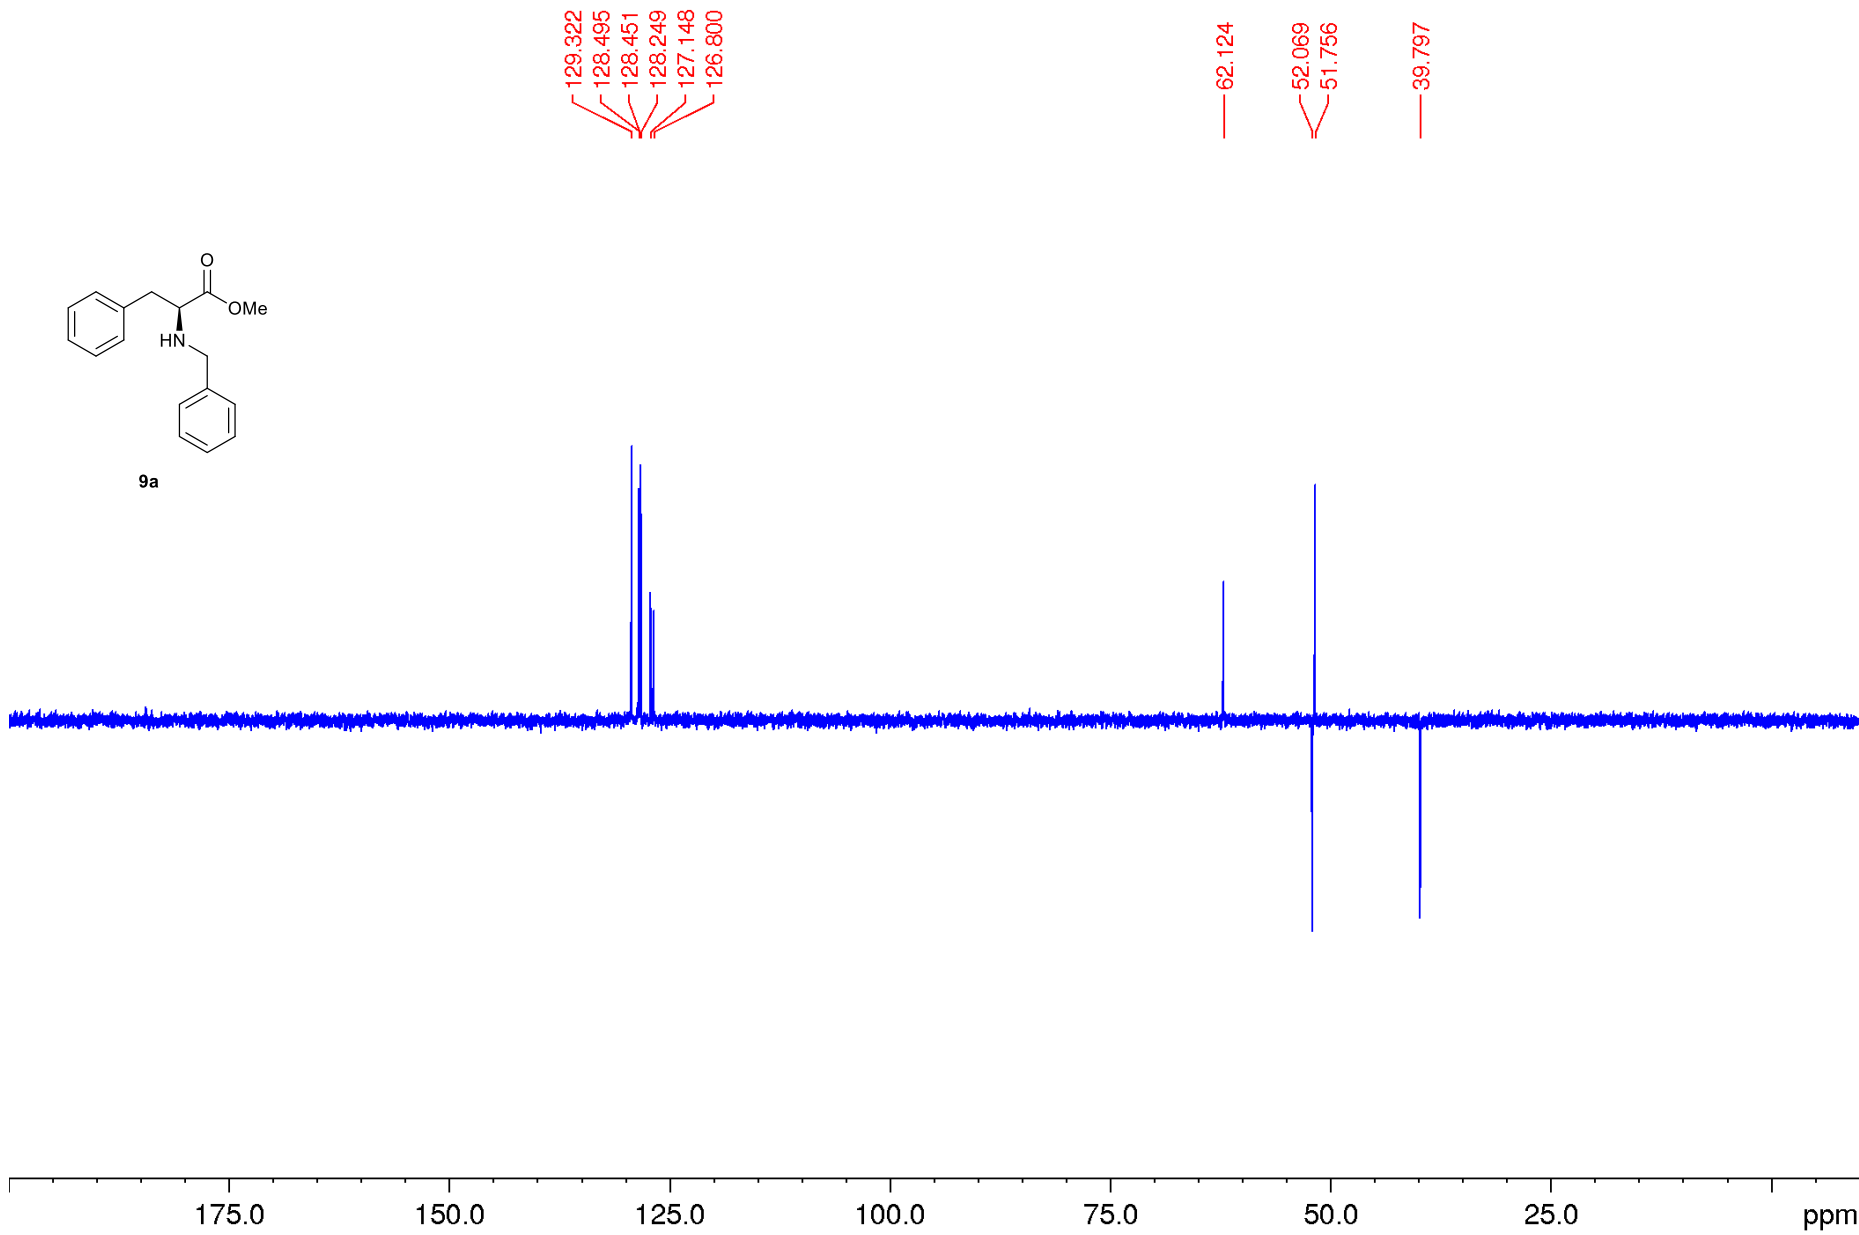

# <sup>1</sup>H NMR-spectrum (400.13 MHz) (CDCl<sub>3</sub>)

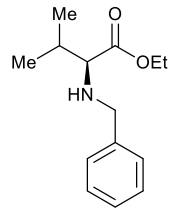

9b

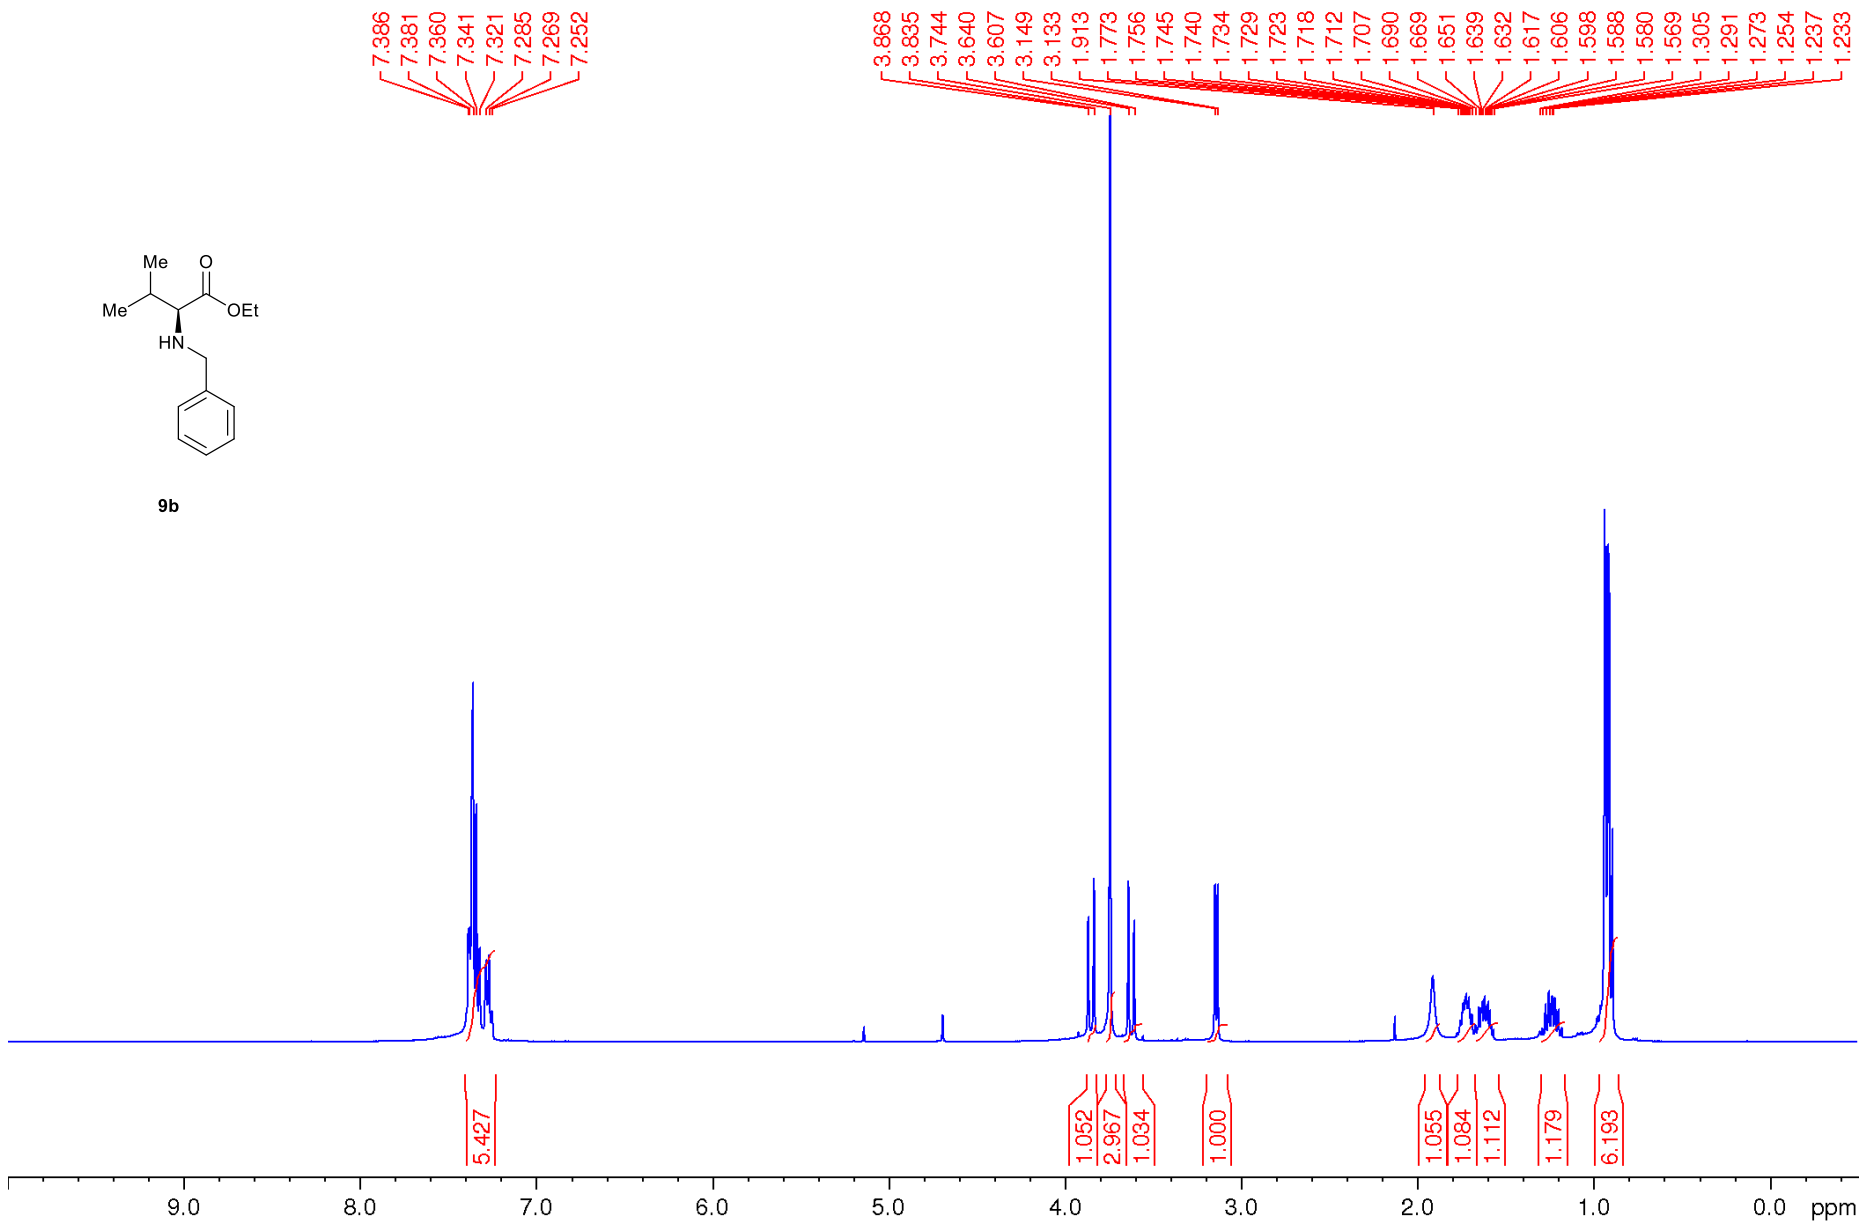

$^{13}\text{C}$  NMR-spectrum (100.6 MHz) ( $\text{CDCl}_3$ )

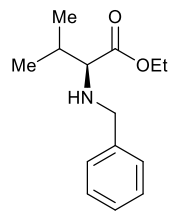

9b

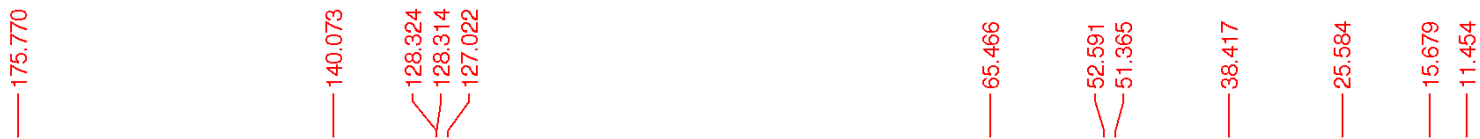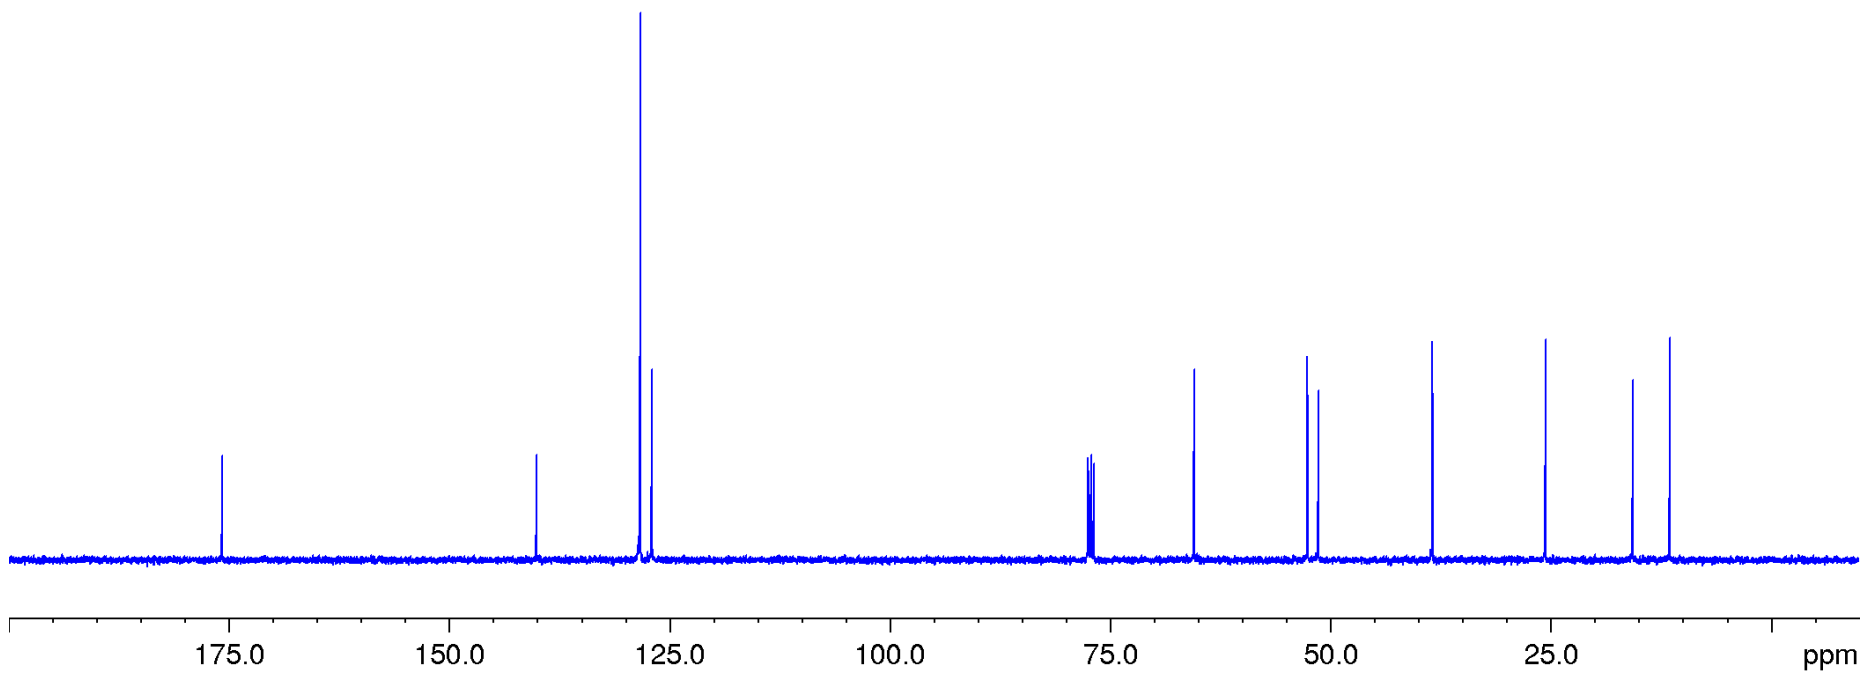

# DEPT 135 NMR-spectrum (CDCl<sub>3</sub>)



9b

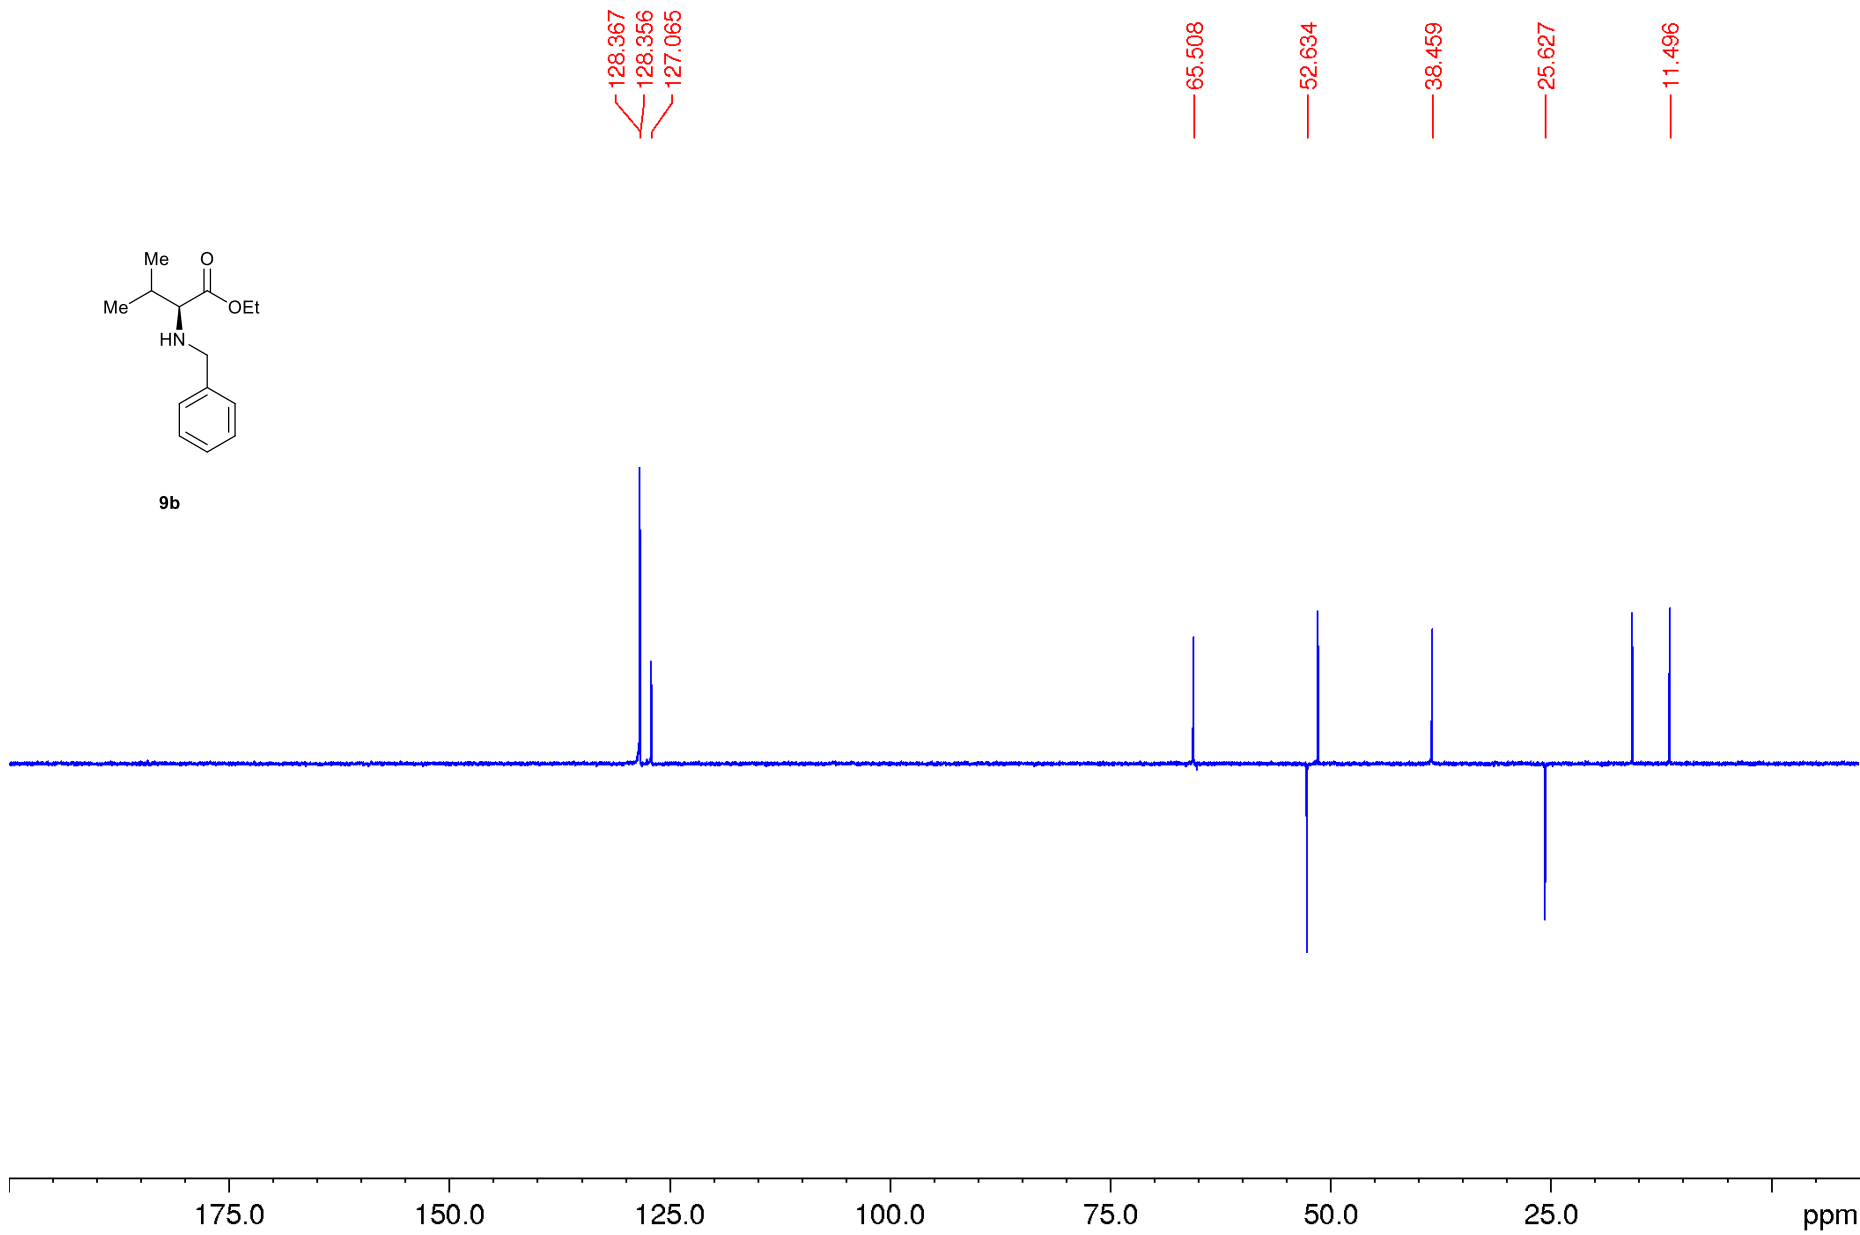

# <sup>1</sup>H NMR-spectrum (400.13 MHz) (CDCl<sub>3</sub>)

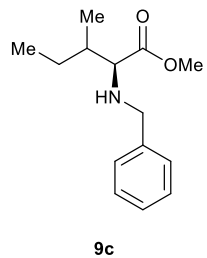

7.272  
7.268  
7.251  
7.238  
7.233  
7.220  
7.216  
7.205  
7.201  
7.170  
7.166  
7.154  
7.148  
7.142  
7.135  
7.131  
7.127

4.145  
4.136  
4.128  
4.118  
4.111  
4.100  
4.093  
4.082  
4.075  
4.066  
3.766  
3.734  
3.527  
3.494  
2.920  
2.905  
1.883  
1.866  
1.850  
1.833  
1.817  
1.800  
1.724  
1.215  
1.197  
1.179  
0.884  
0.870  
0.867  
0.853

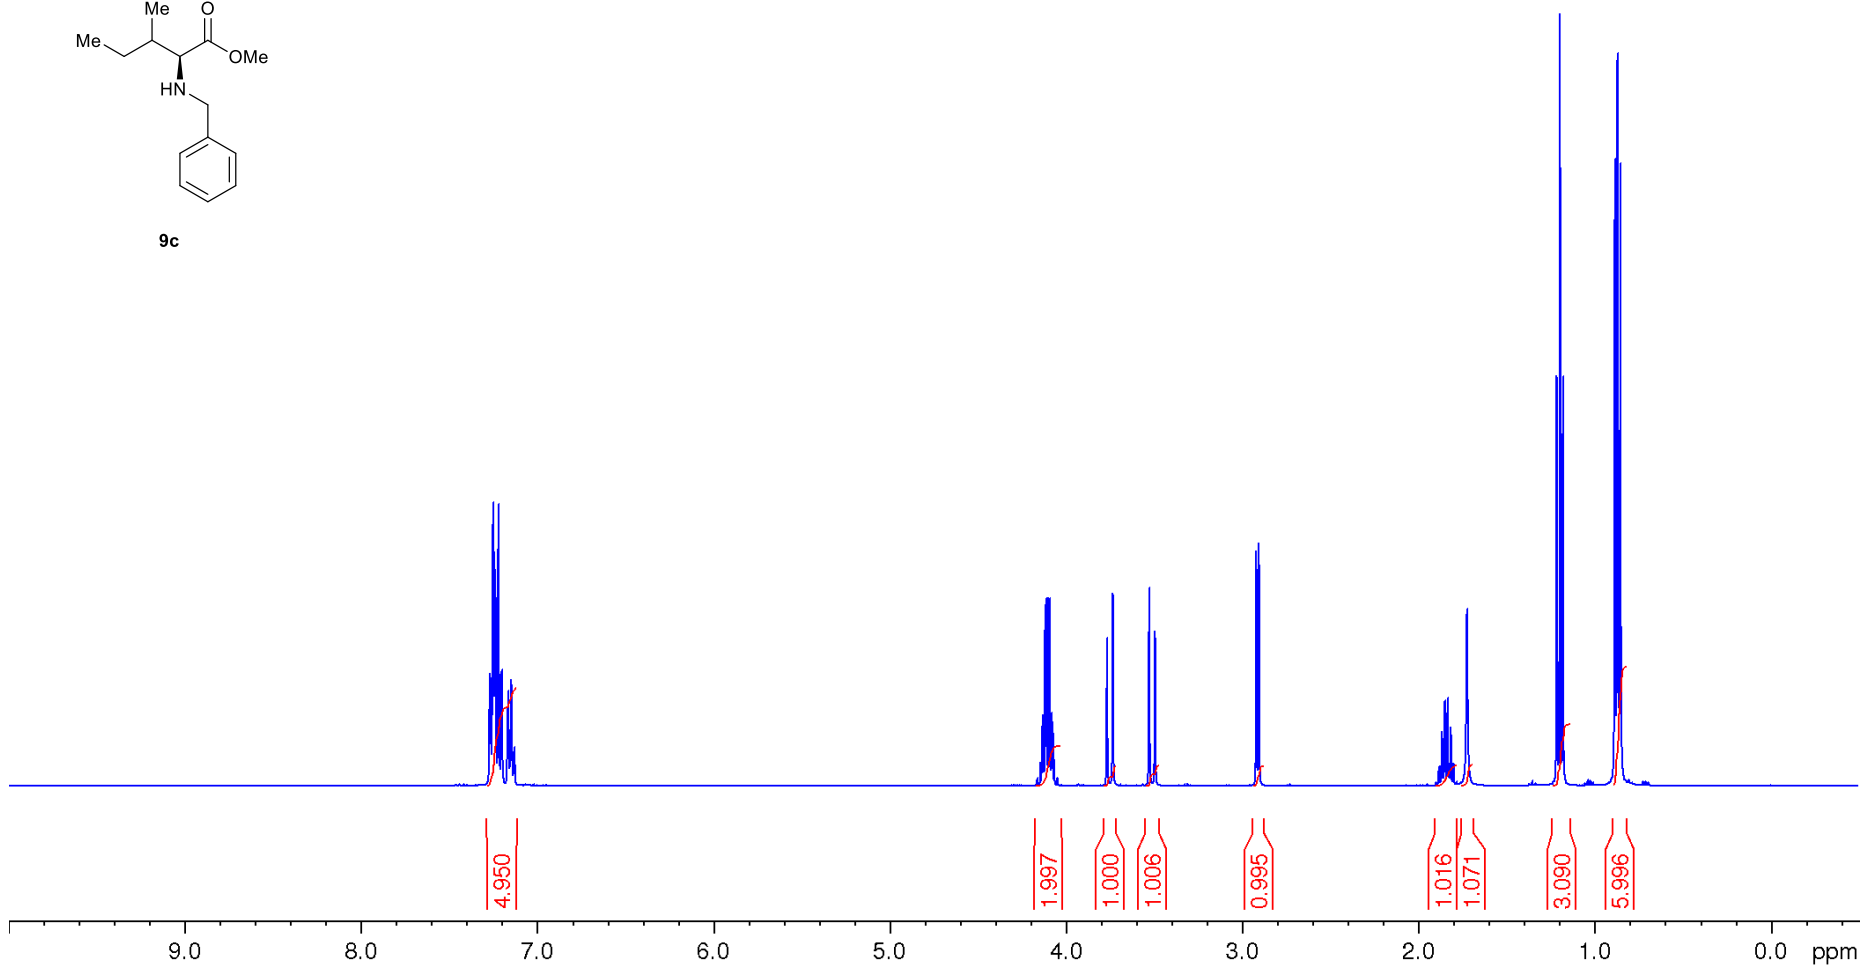

$^{13}\text{C}$  NMR-spectrum (100.6 MHz) ( $\text{CDCl}_3$ )

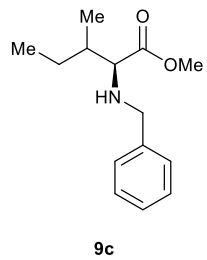

175.319  
140.255  
128.342  
128.328  
127.017  
66.650  
60.402  
52.615  
31.783  
19.387  
18.708  
14.495

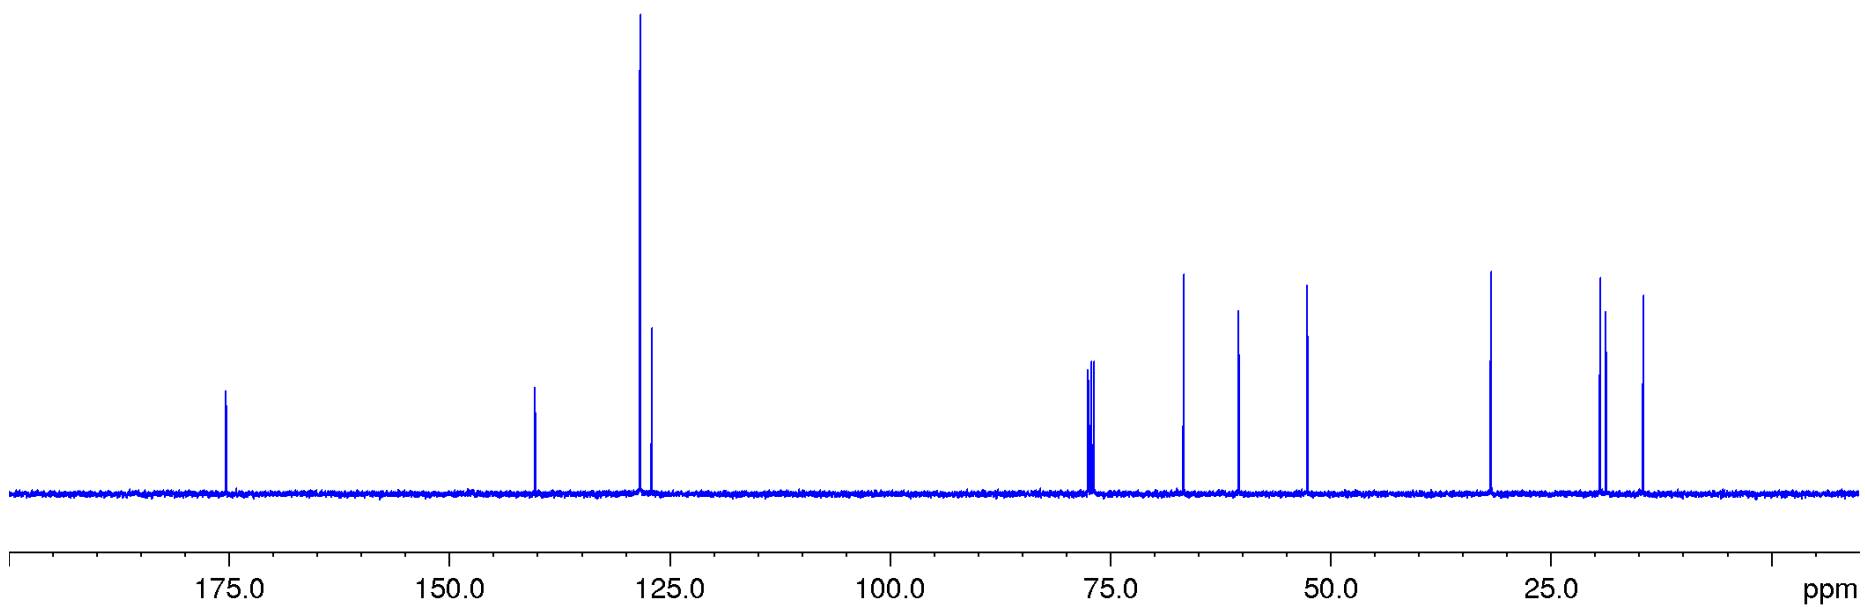



# DEPT 135 NMR-spectrum (CDCl<sub>3</sub>)

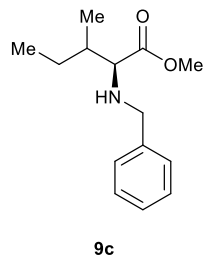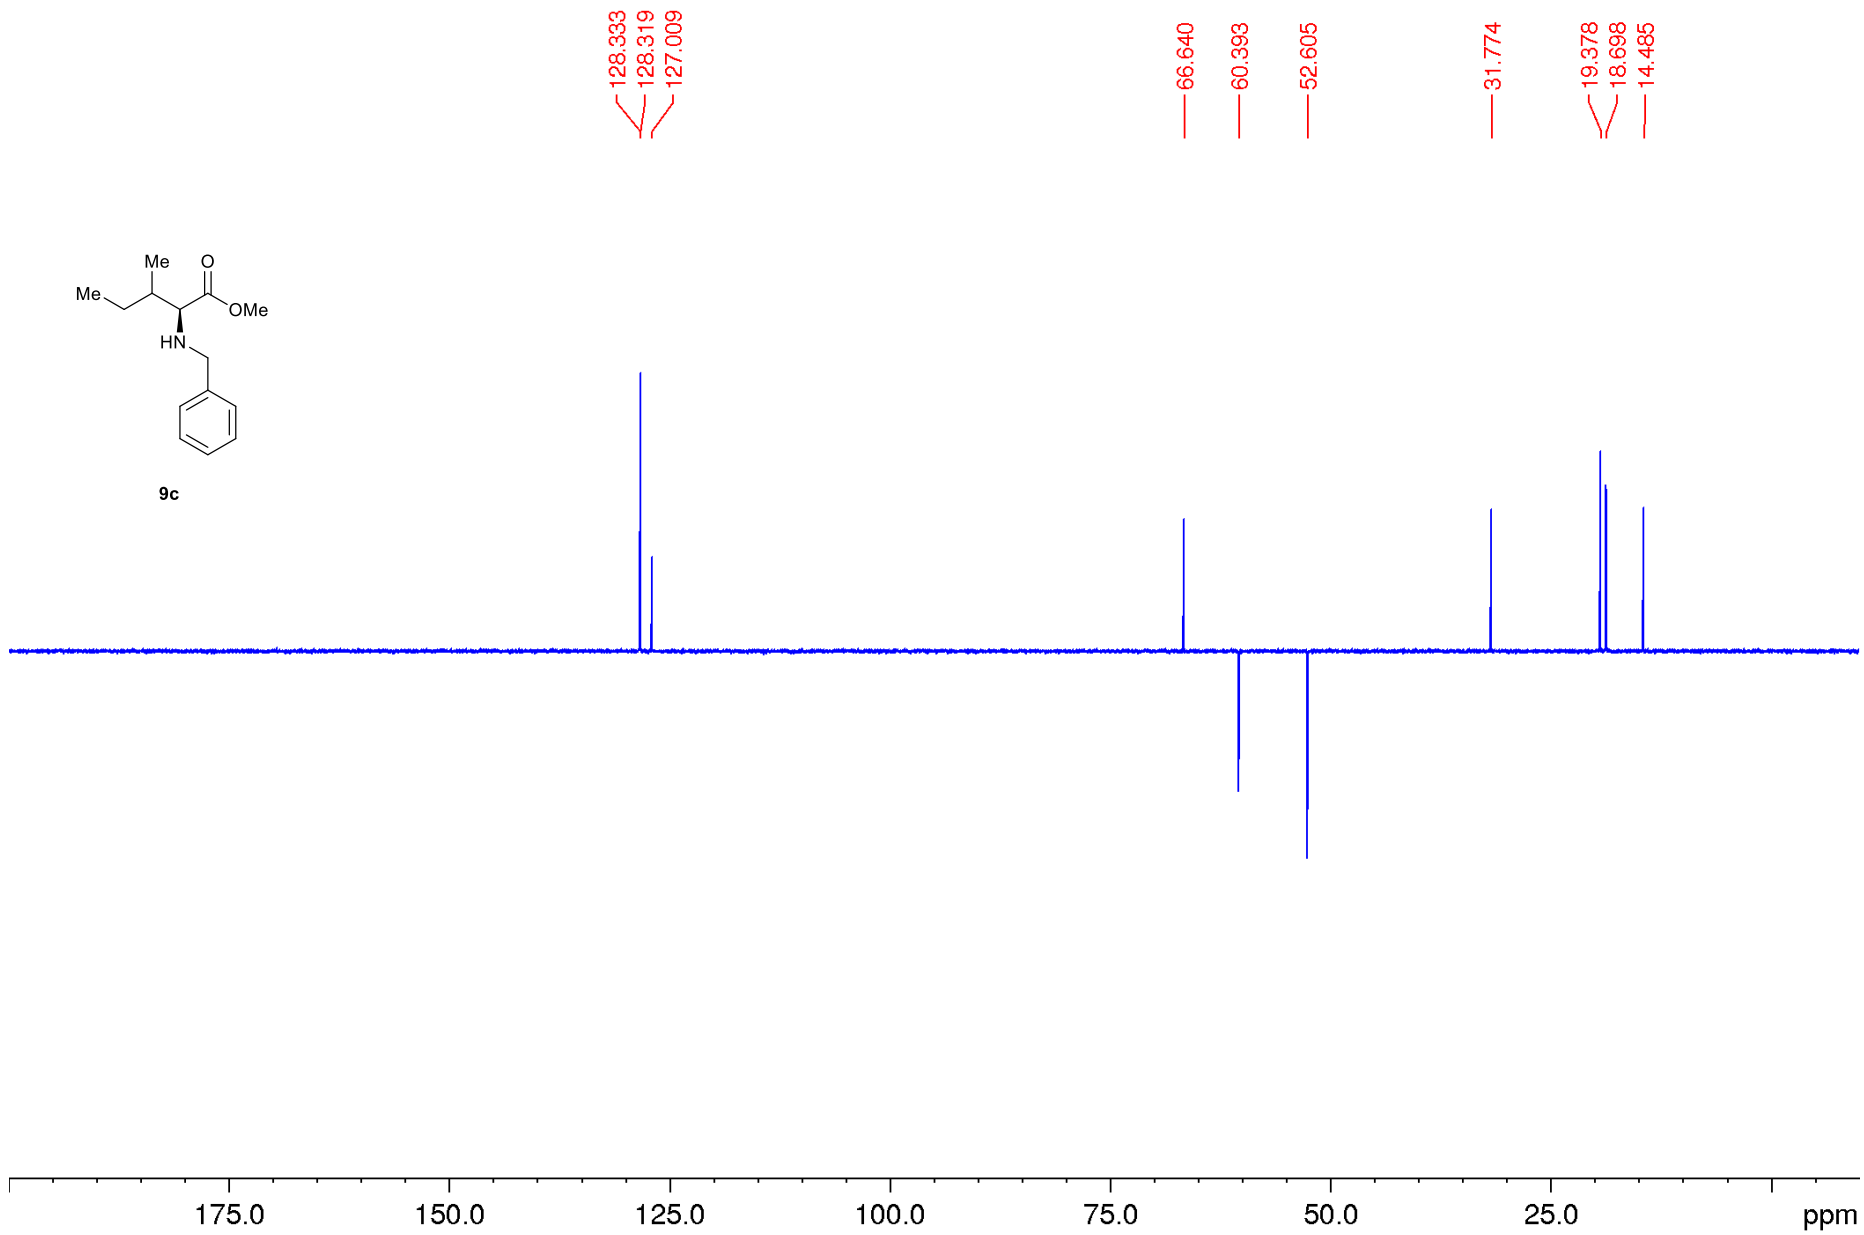

<sup>1</sup>H NMR-spectrum (400.13 MHz) (CDCl<sub>3</sub>)

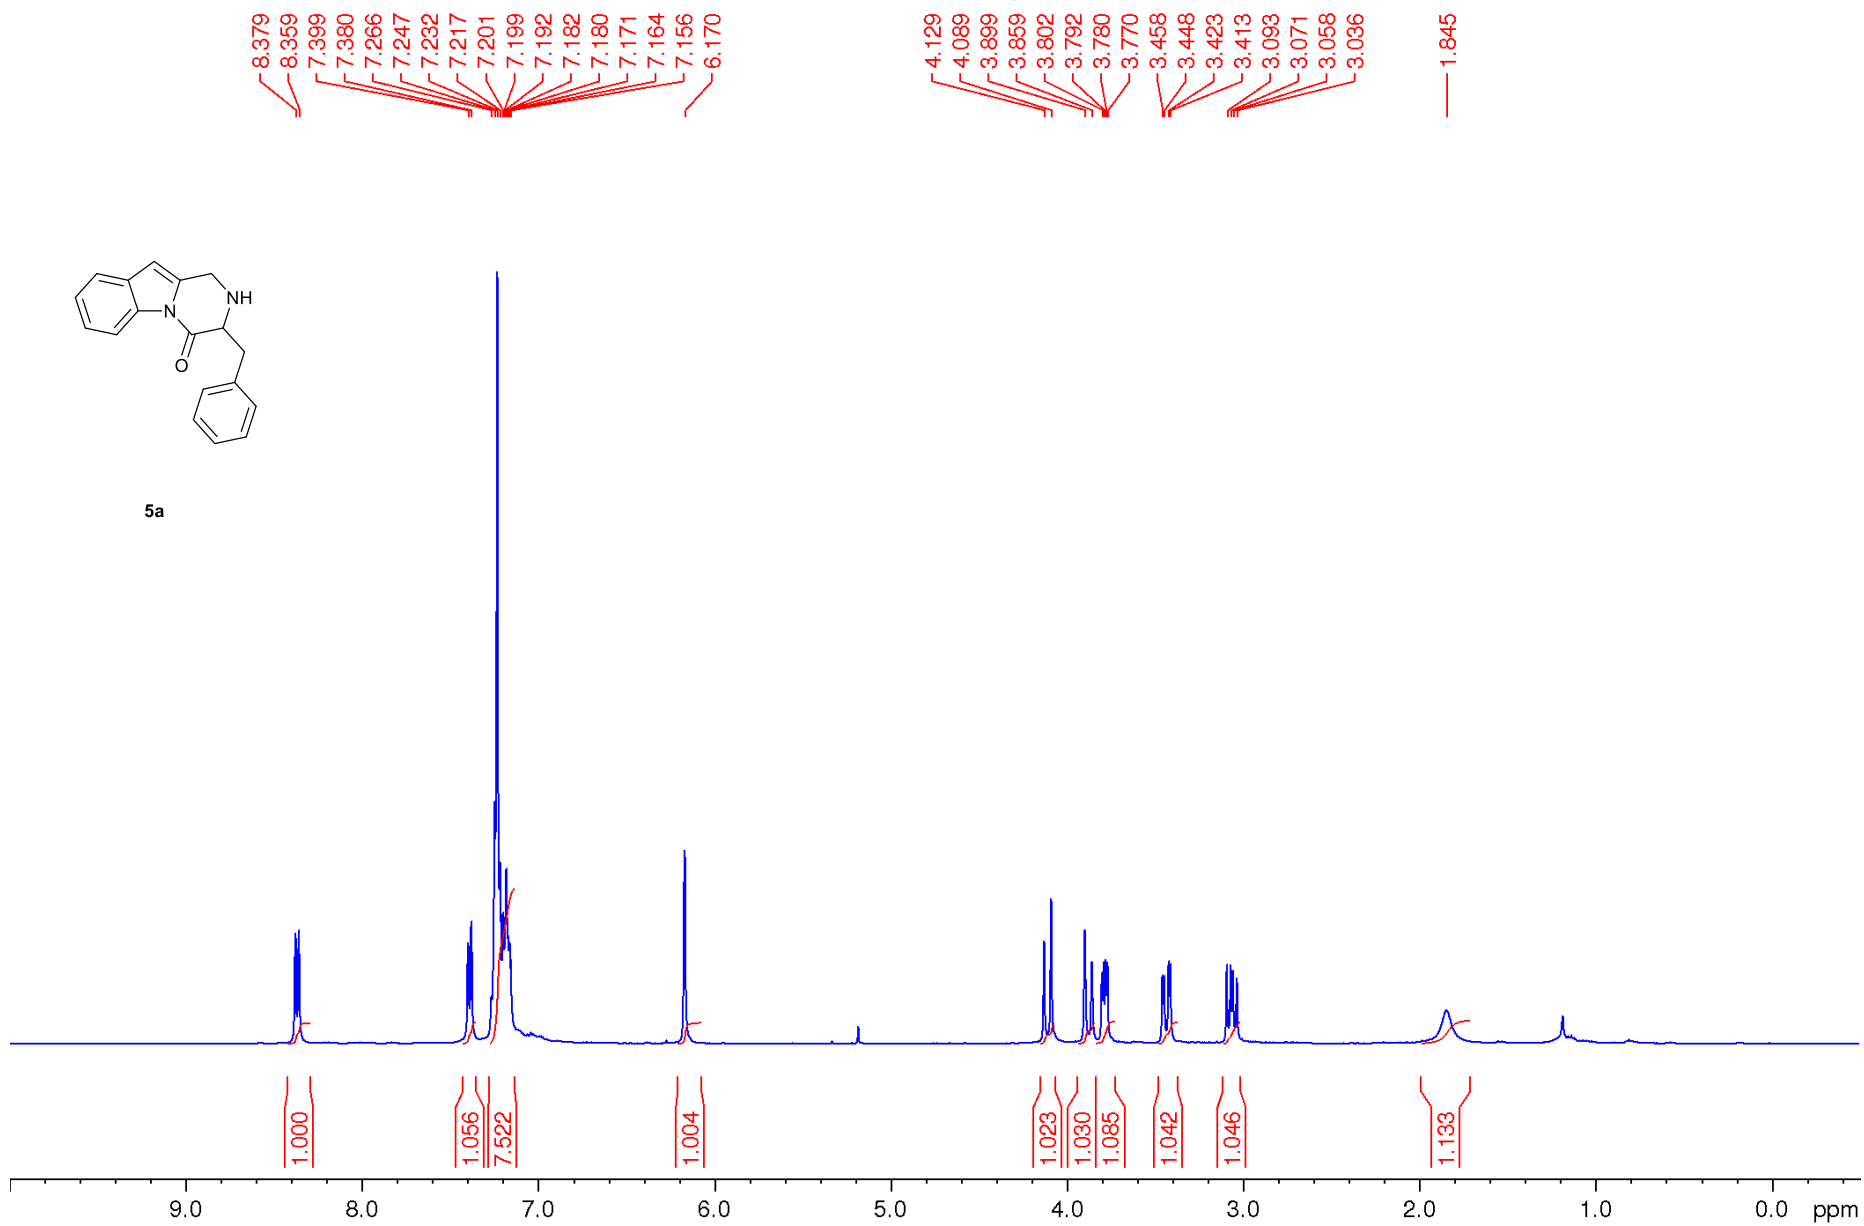

$^{13}\text{C}$  NMR-spectrum (100.6 MHz) ( $\text{CDCl}_3$ )

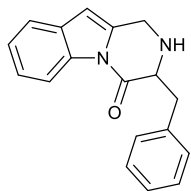

5a

169.130

137.488

136.632

134.704

129.518

128.807

126.990

124.437

124.219

120.195

116.291

103.103

61.269

41.909

36.300

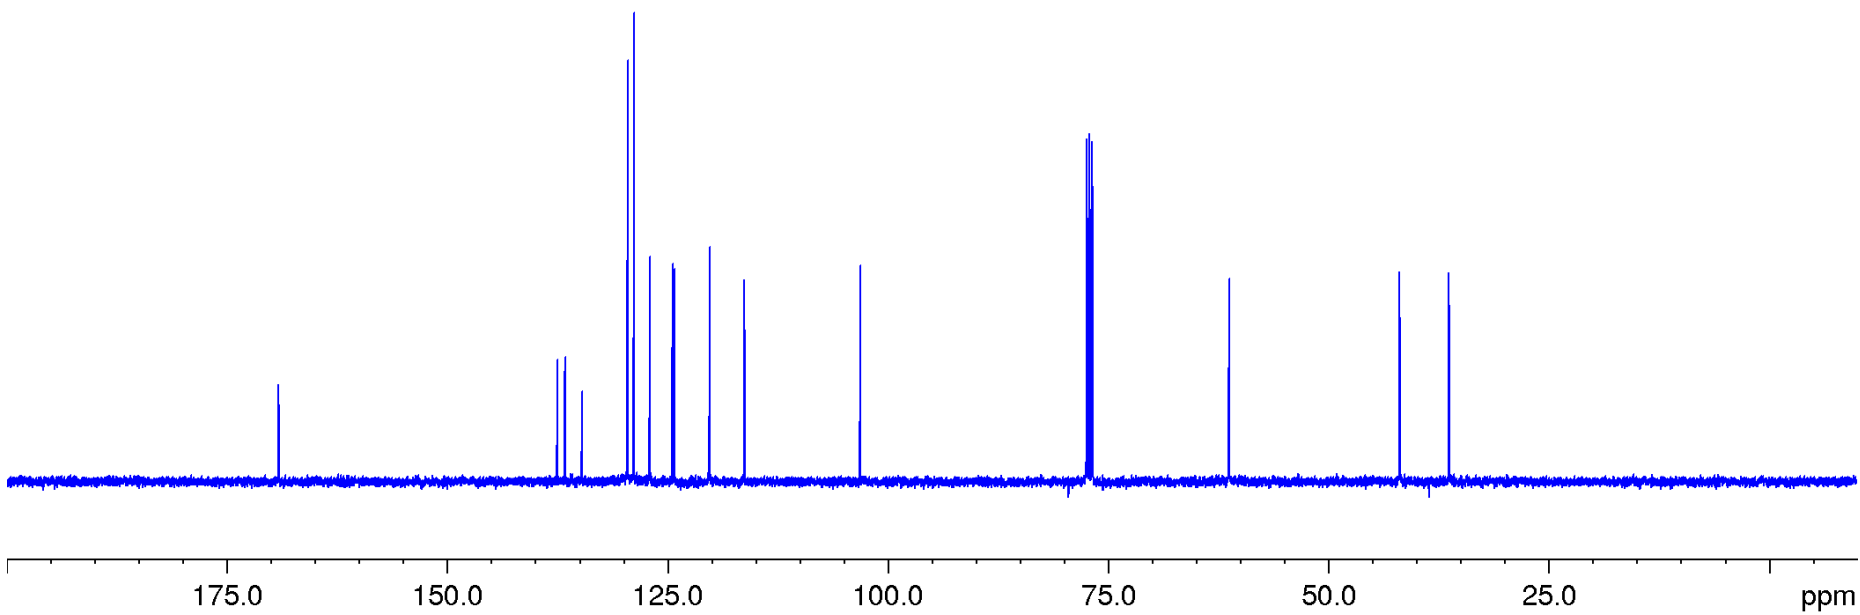

# DEPT 135 NMR-spectrum (CDCl<sub>3</sub>)

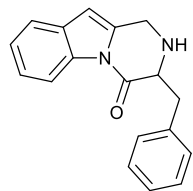

5a

129.544  
128.834  
127.017  
124.464  
124.246  
120.222  
116.317  
115.921

103.130

61.297

41.937

36.328

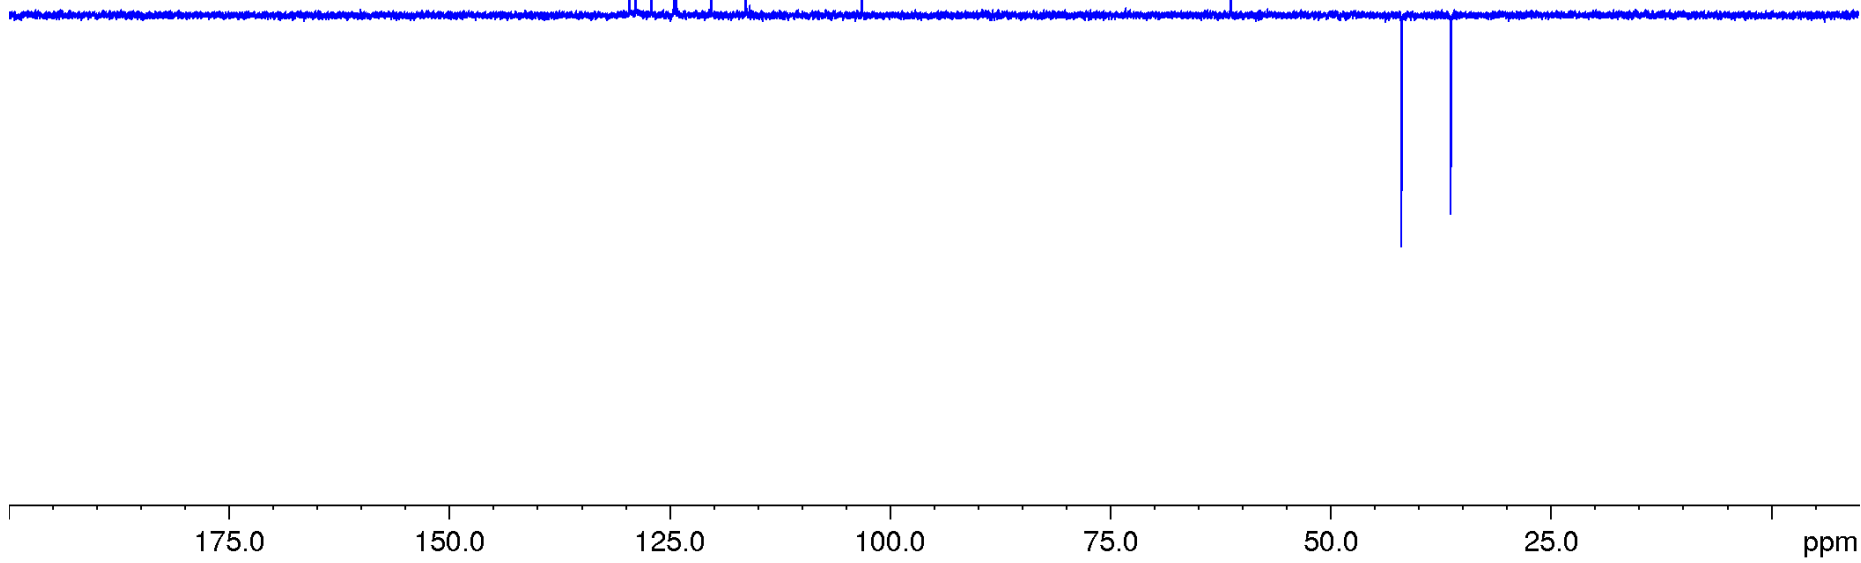

# <sup>1</sup>H NMR-spectrum (400.13 MHz) (CDCl<sub>3</sub>)

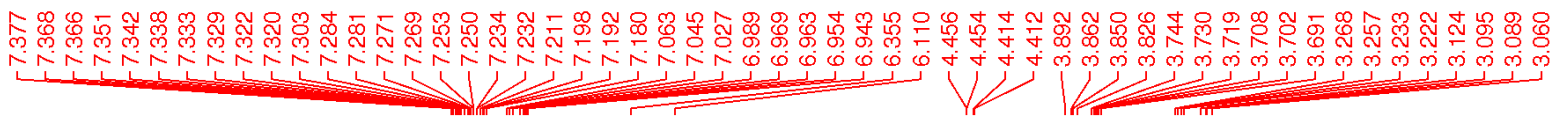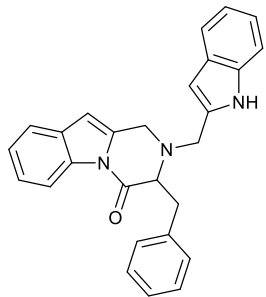

8a

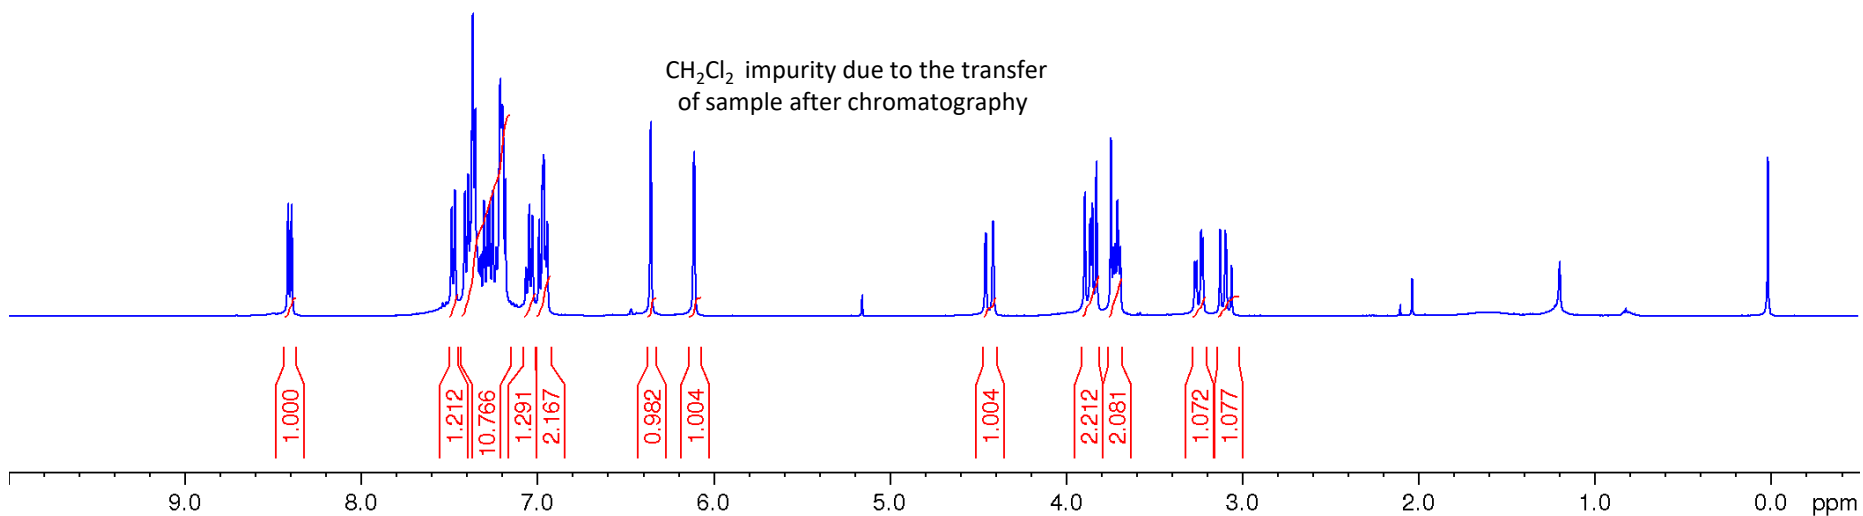

$^{13}\text{C}$  NMR-spectrum (100.6 MHz) ( $\text{CDCl}_3$ )

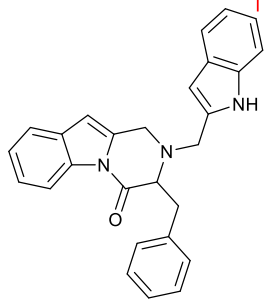

8a

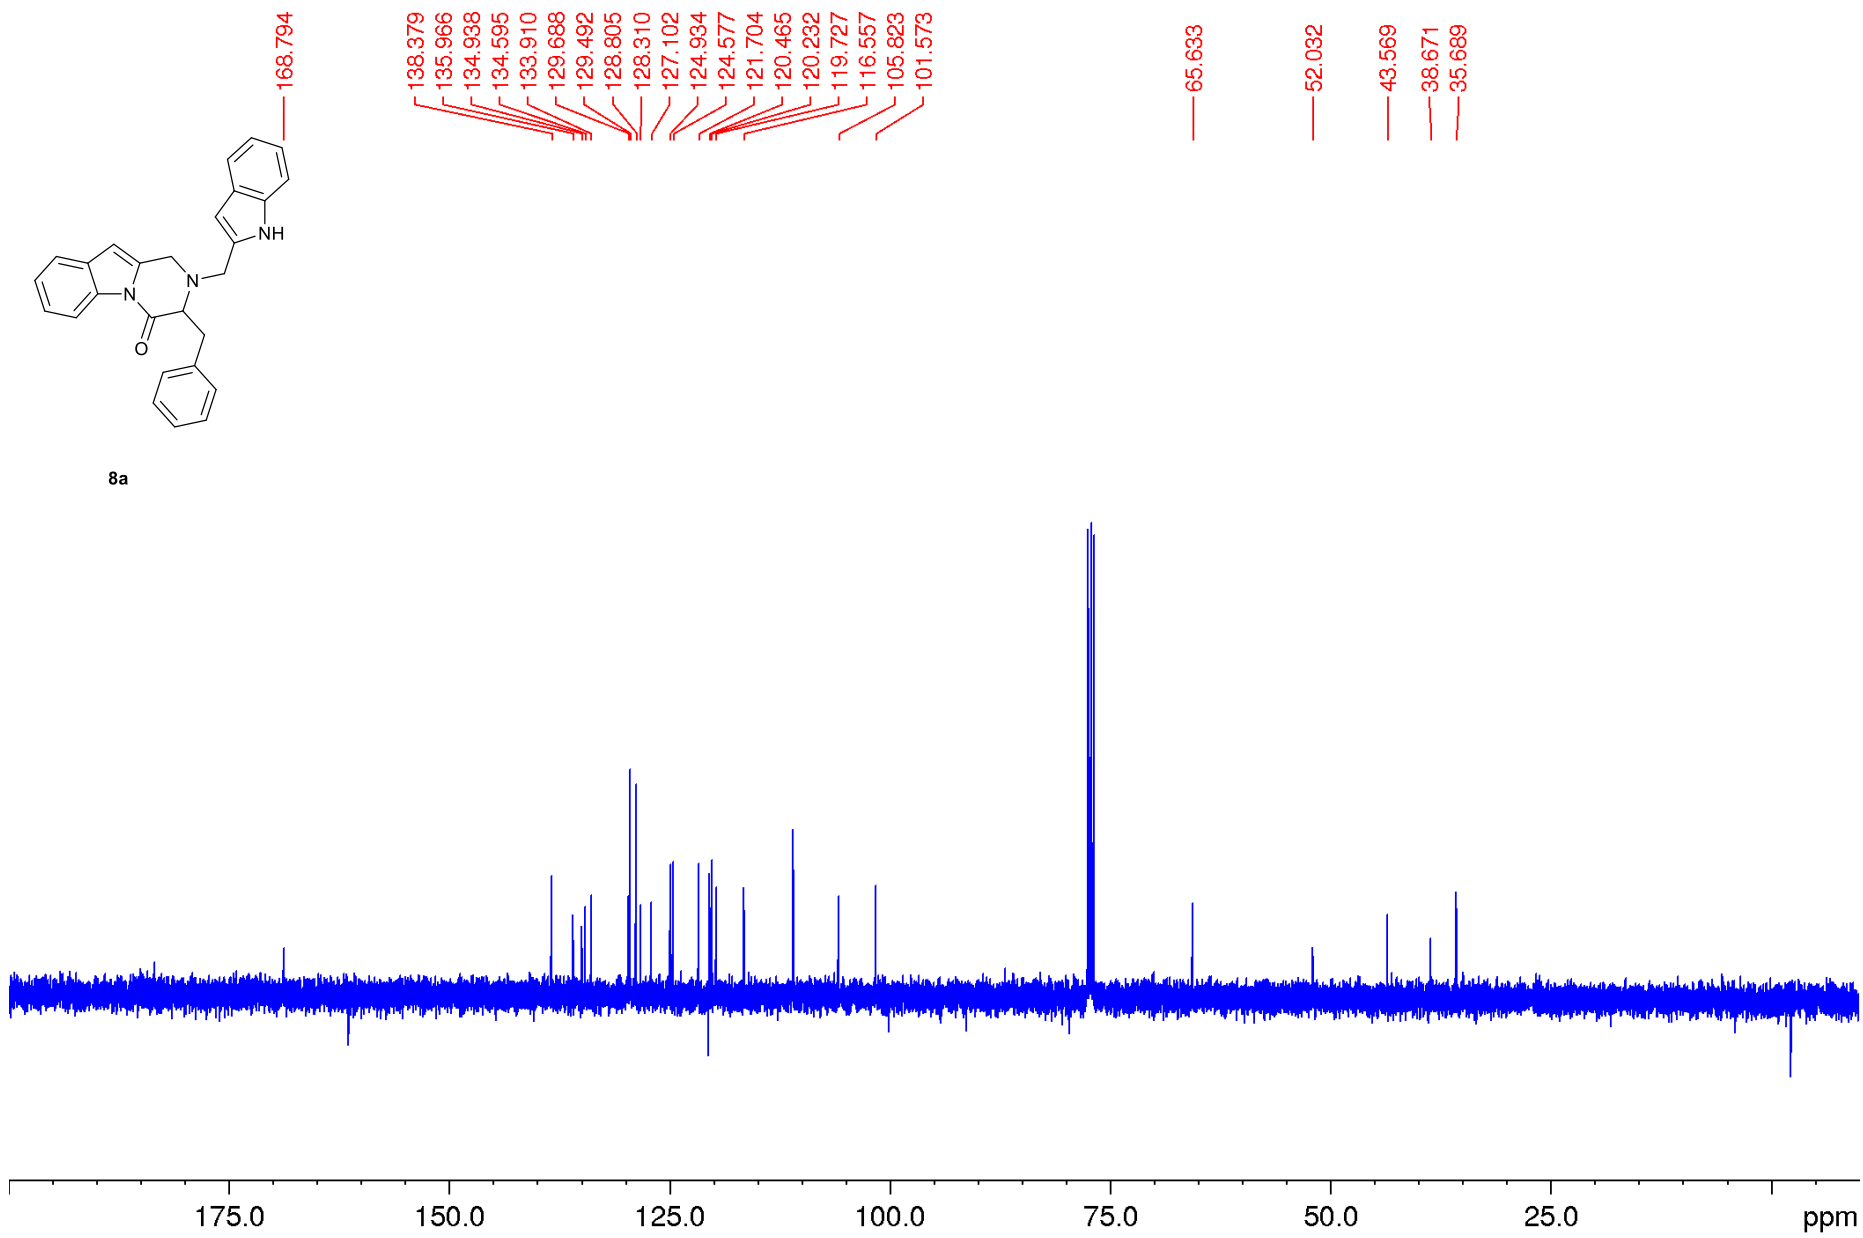

# DEPT 135 NMR-spectrum (CDCl<sub>3</sub>)

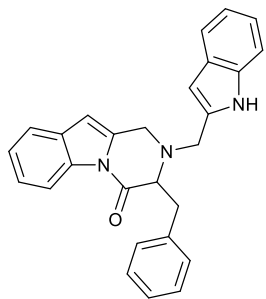

8a

129.397  
128.707  
127.006  
124.898  
124.480  
121.607  
120.369  
120.136  
119.630  
116.462  
110.912  
105.724  
101.478

65.534

51.936

43.472

35.593

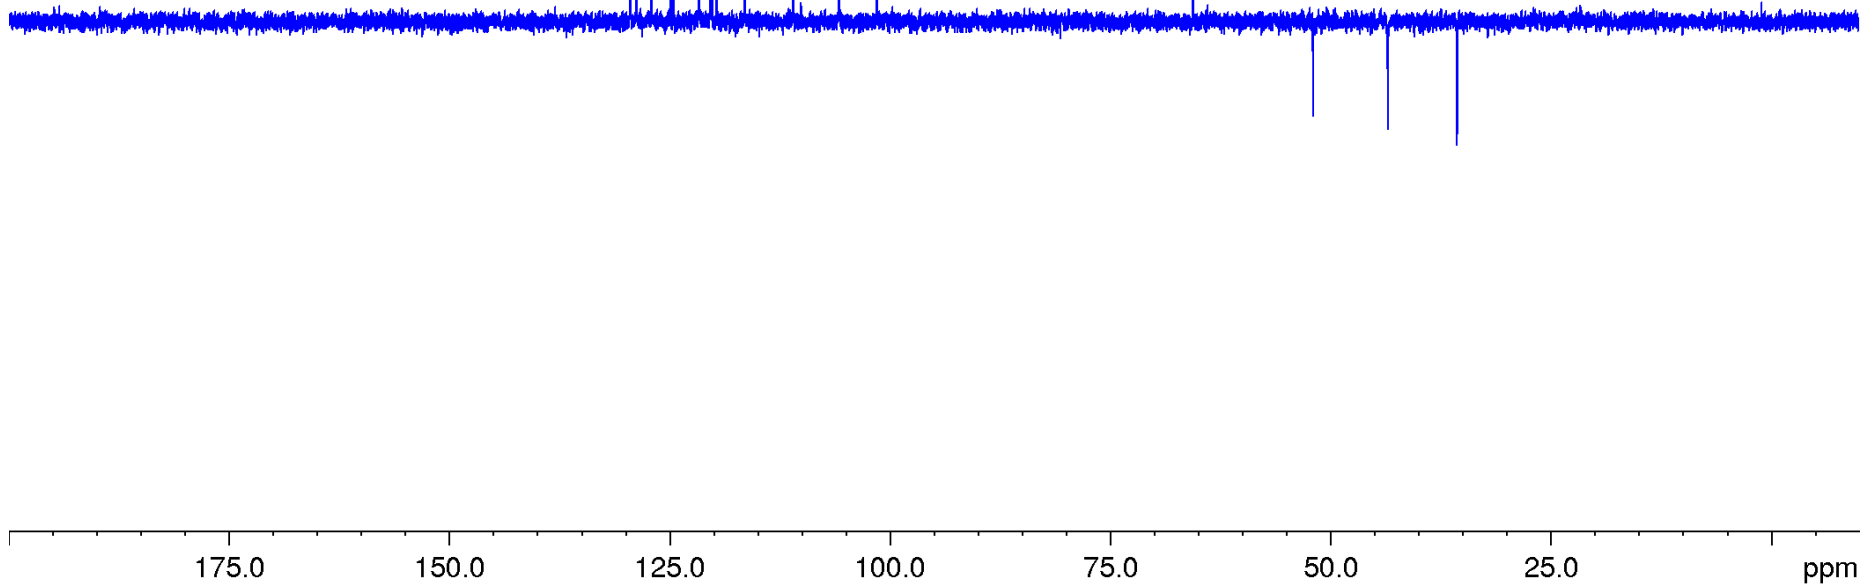

# $^1\text{H}$ NMR-spectrum (400.13 MHz) ( $\text{CDCl}_3$ )

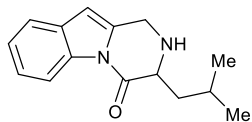

5b

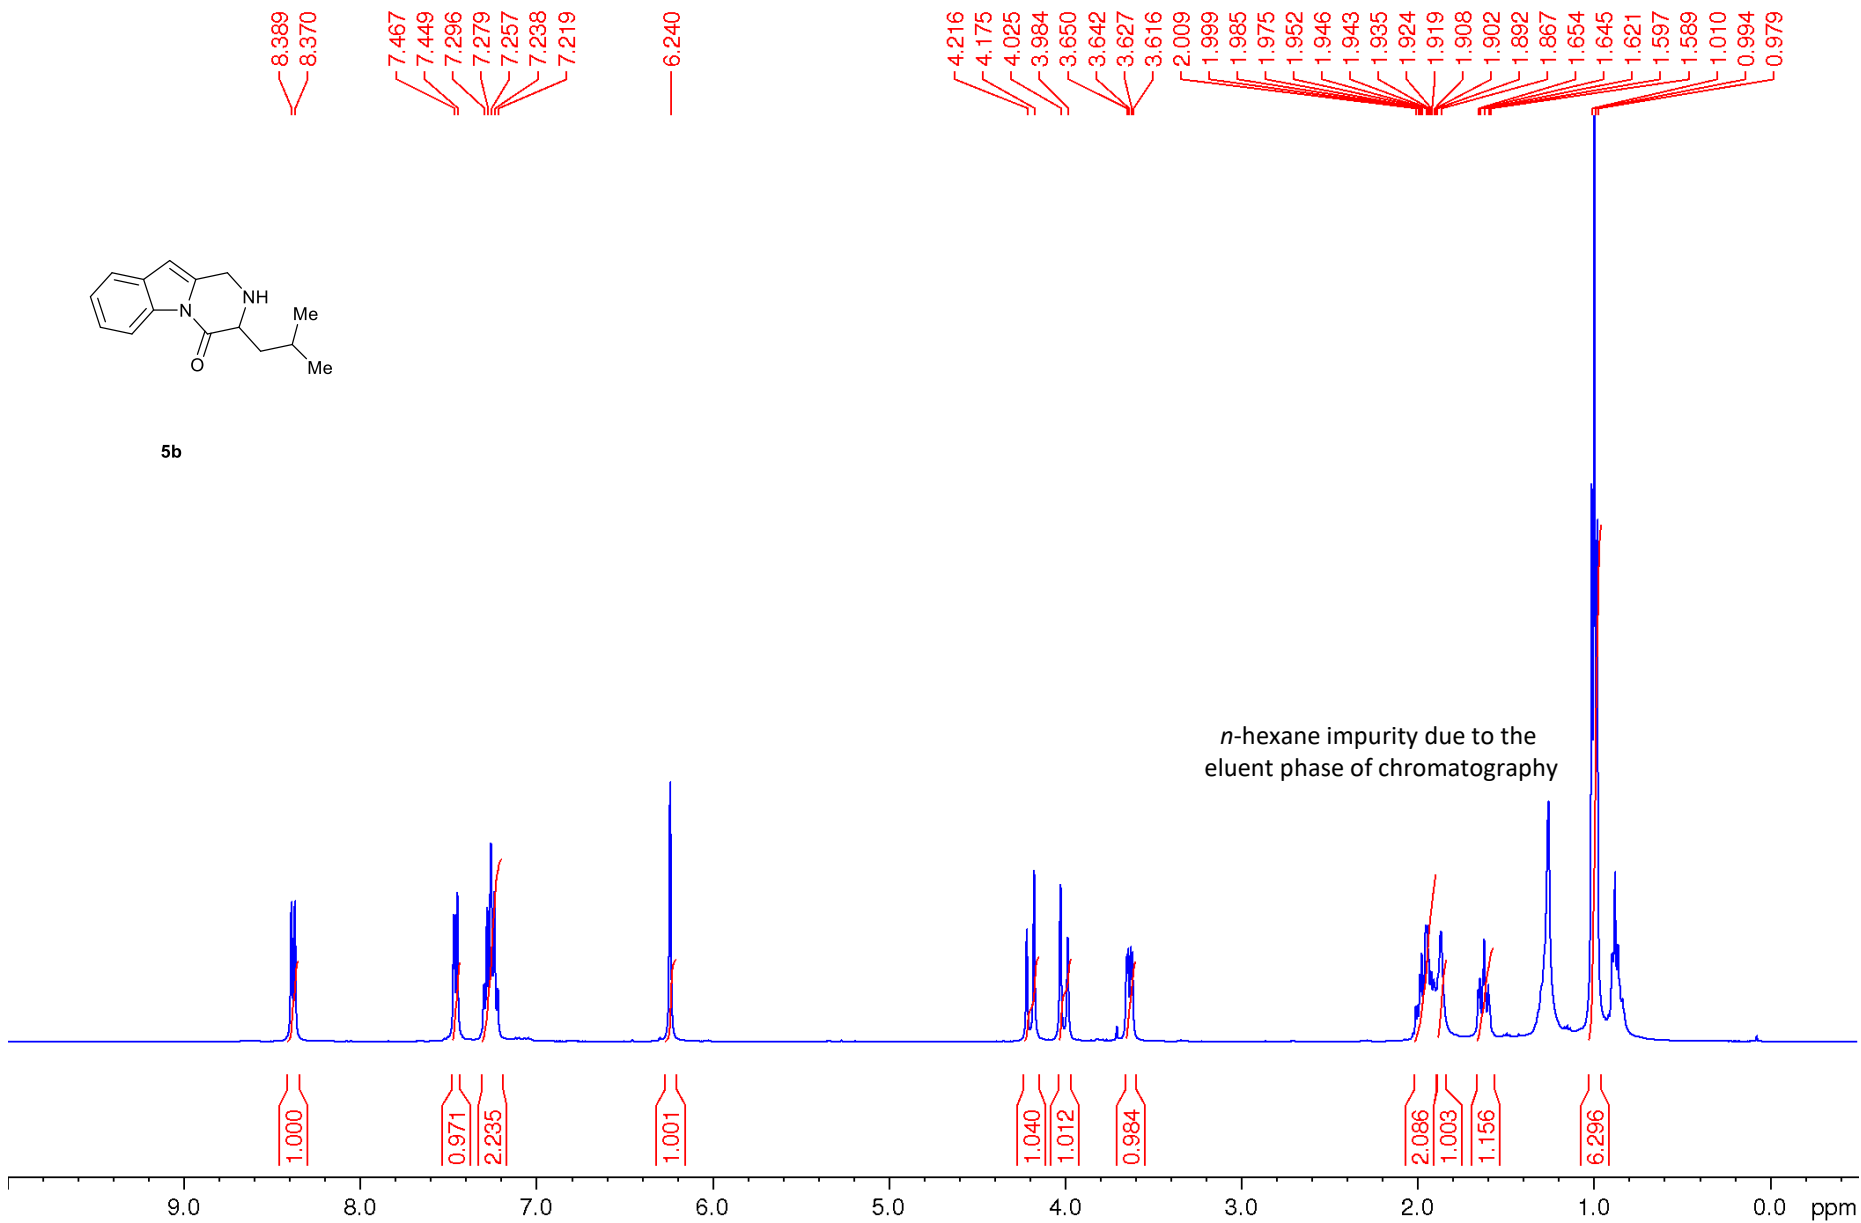



$^{13}\text{C}$  NMR-spectrum (100.6 MHz) ( $\text{CDCl}_3$ )

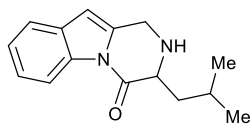

5b

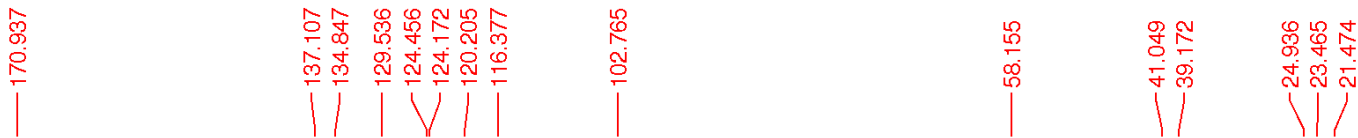

*n*-hexane impurity due to the eluent phase of chromatography

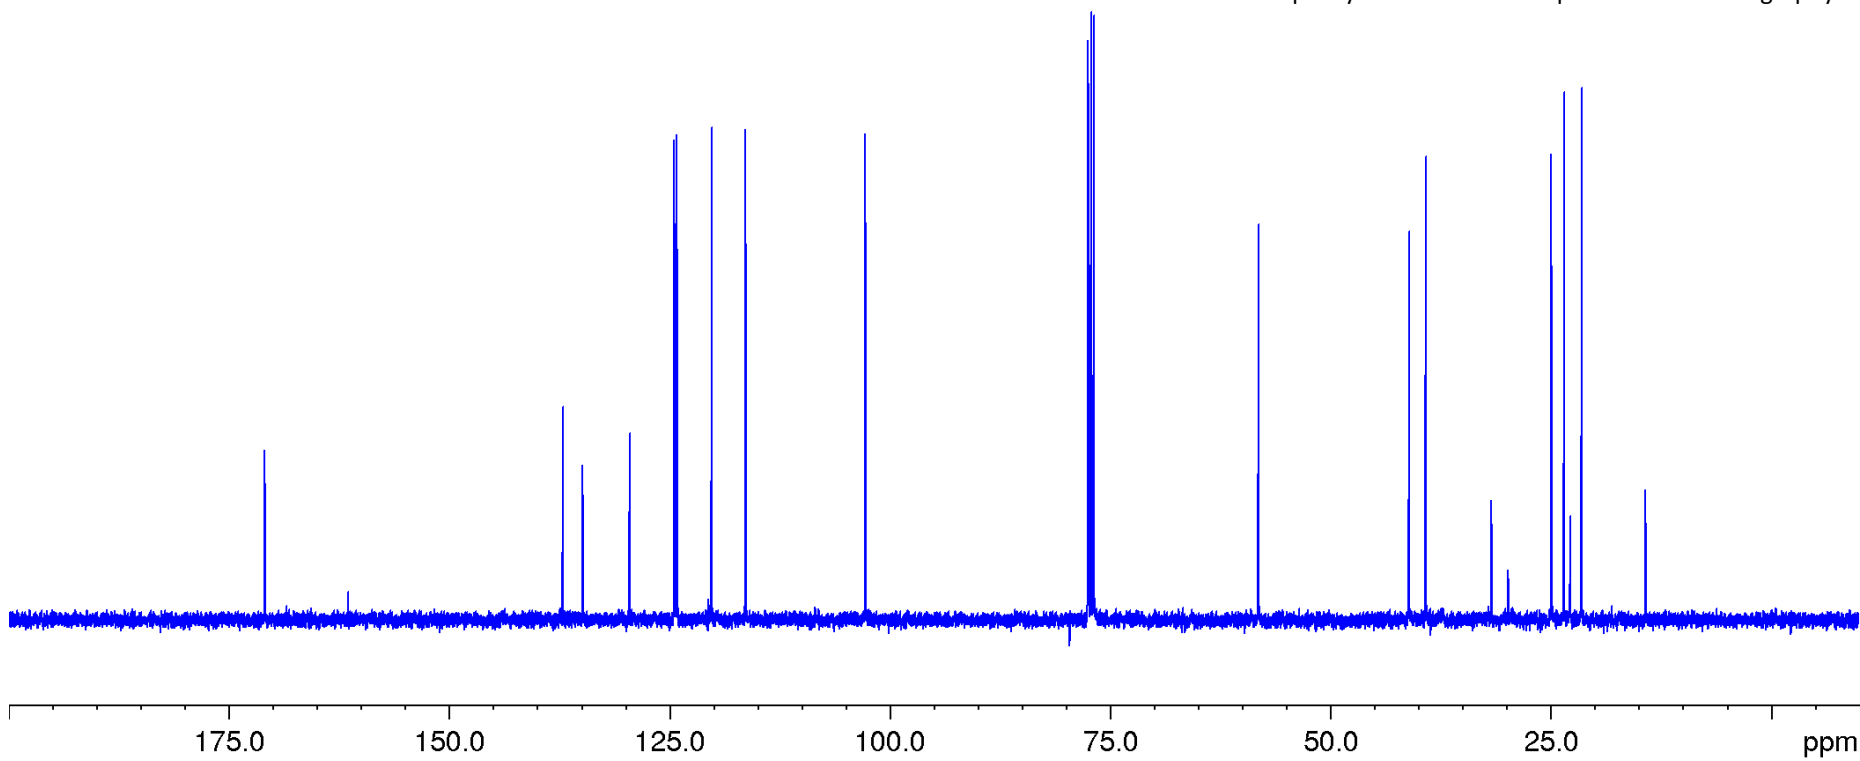

# DEPT 135 NMR-spectrum (CDCl<sub>3</sub>)



5b

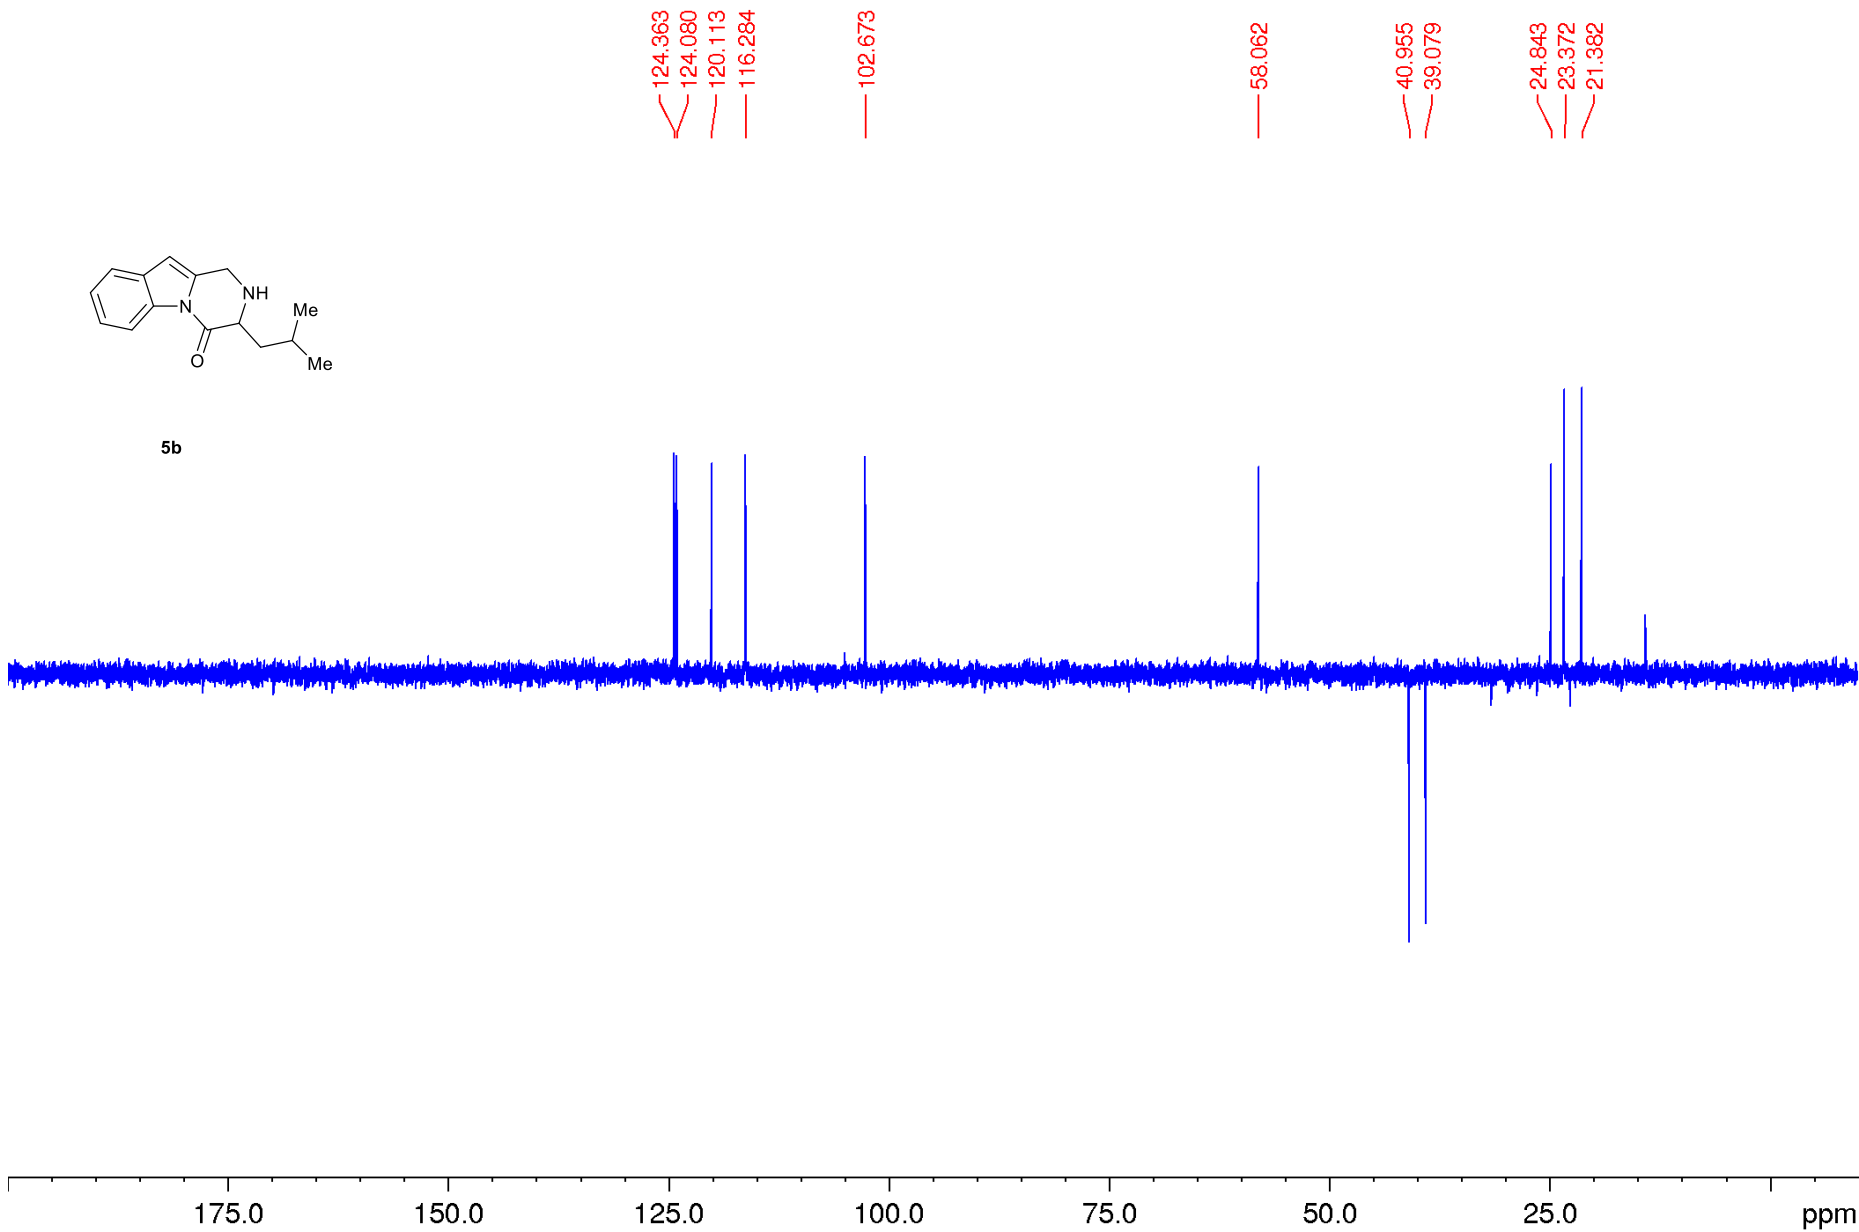

# <sup>1</sup>H NMR-spectrum (400.13 MHz) (CDCl<sub>3</sub>)

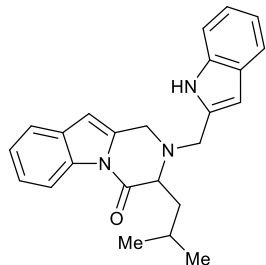

8b

8.370  
8.350  
8.196  
7.479  
7.459  
7.434  
7.416  
7.274  
7.255  
7.239  
7.236  
7.223  
7.205  
7.188  
7.166  
7.114  
7.096  
7.078  
7.035  
7.016  
6.998  
6.238

4.130  
4.088  
3.861  
3.827  
3.802  
3.774  
3.760  
3.739  
3.631  
3.616  
3.608  
3.593  
2.018  
1.972  
1.957  
1.938  
1.921  
1.905  
1.888  
1.840  
1.826  
1.816  
1.804  
1.791  
1.781  
1.767  
1.702  
1.688  
1.681  
1.667  
1.653  
1.646  
1.631  
0.965  
0.948

*n*-hexane impurity due to the eluent phase of chromatography

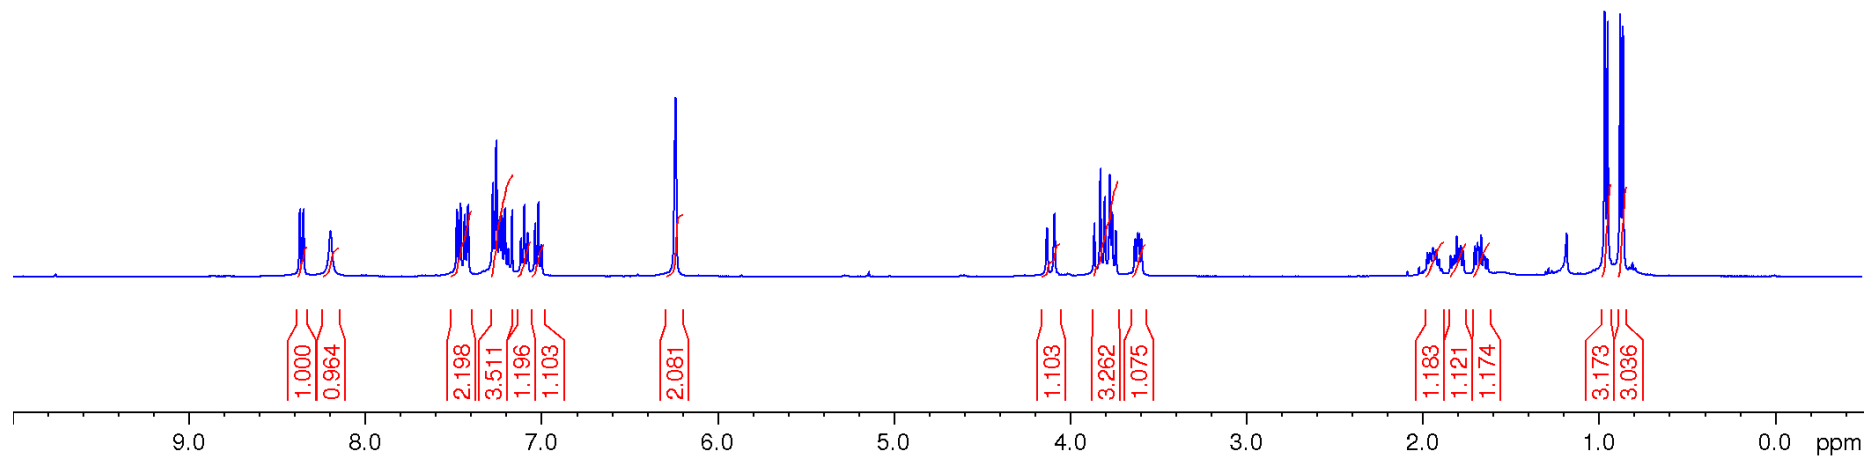

# $^{13}\text{C}$ NMR-spectrum (100.6 MHz) ( $\text{CDCl}_3$ )

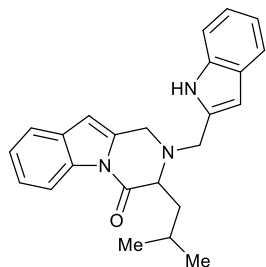

8b

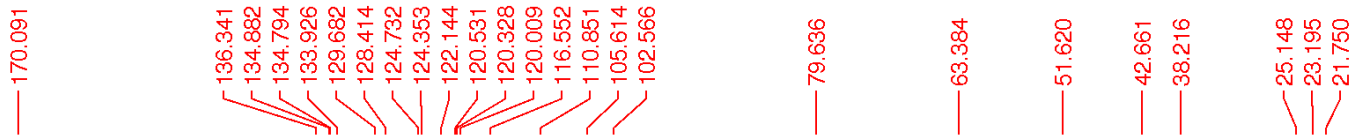

*n*-hexane impurity due to the eluent phase of chromatography

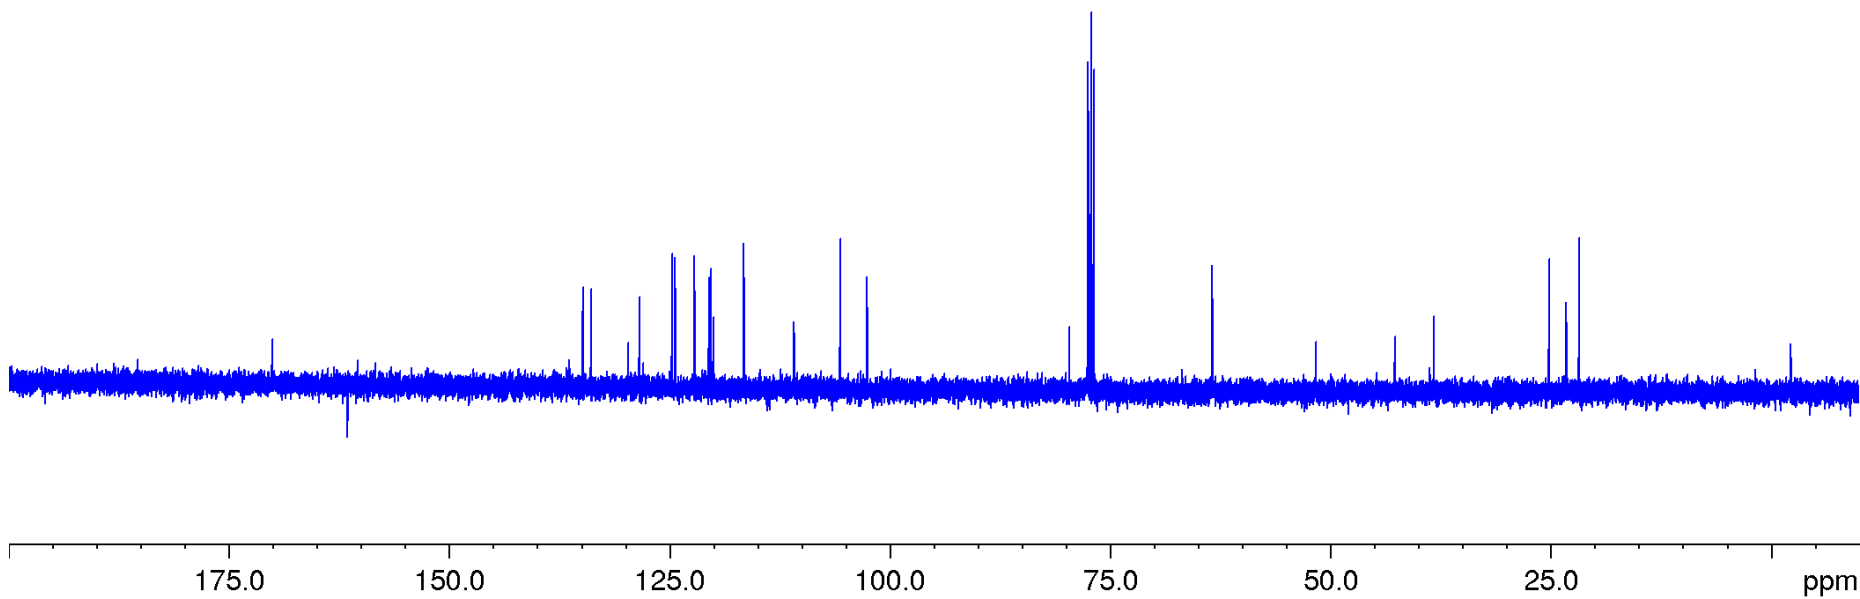

# DEPT 135 NMR-spectrum (CDCl<sub>3</sub>)



8b

124.779  
124.399  
122.190  
120.576  
120.373  
120.057  
116.598  
110.899  
105.660  
102.611

63.431

51.666

42.706

38.262

25.194

23.241

21.794

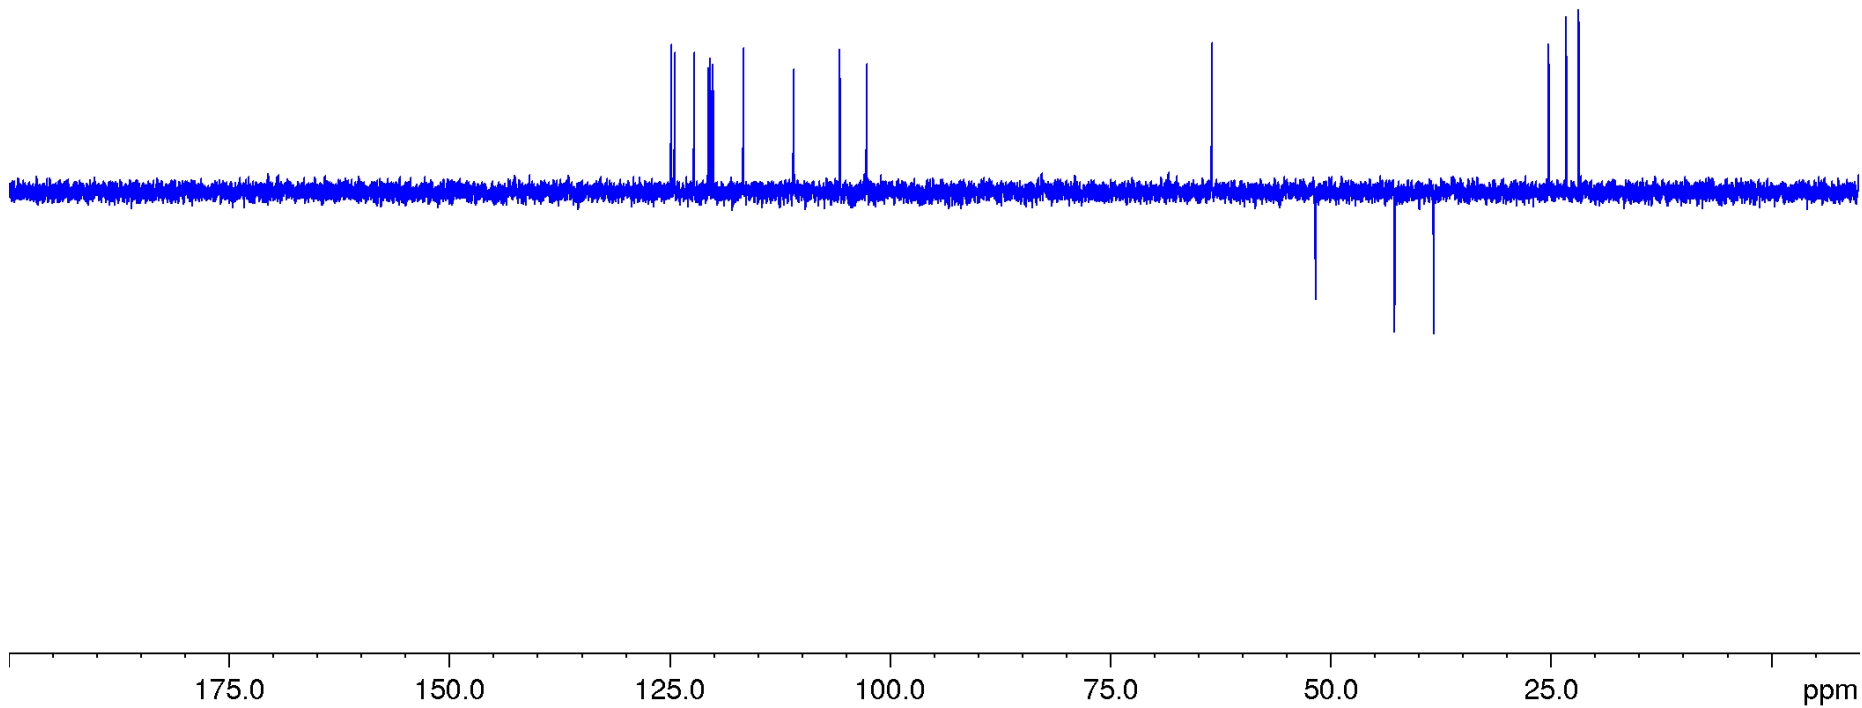

# $^1\text{H}$ NMR-spectrum (400.13 MHz) ( $\text{CDCl}_3$ )

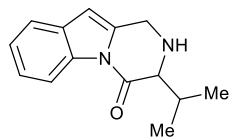

5c

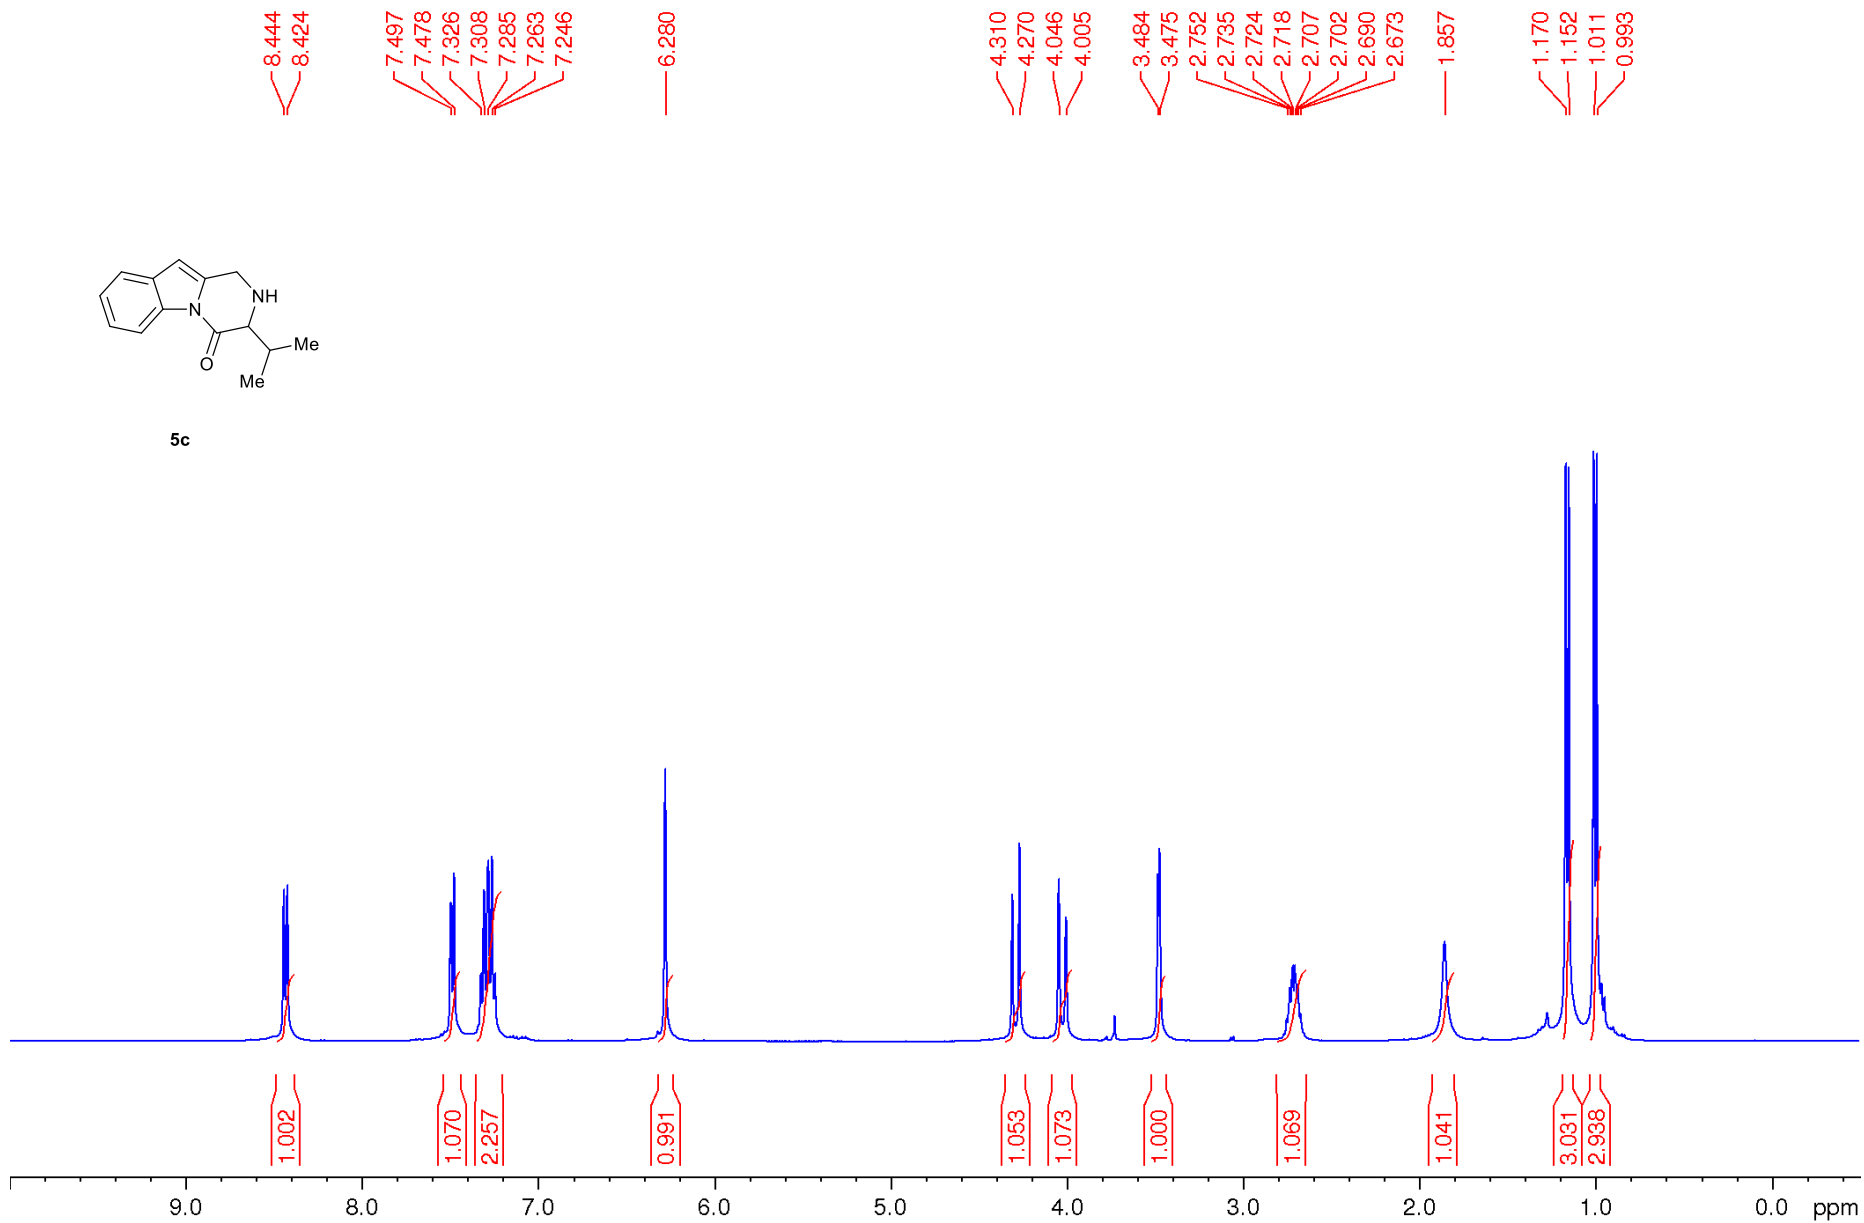

$^{13}\text{C}$  NMR-spectrum (100.6 MHz) ( $\text{CDCl}_3$ )



5c

169.752

137.213

134.795

129.577

124.898

124.157

120.200

116.392

102.692

65.499

42.015

28.241

19.993

17.470

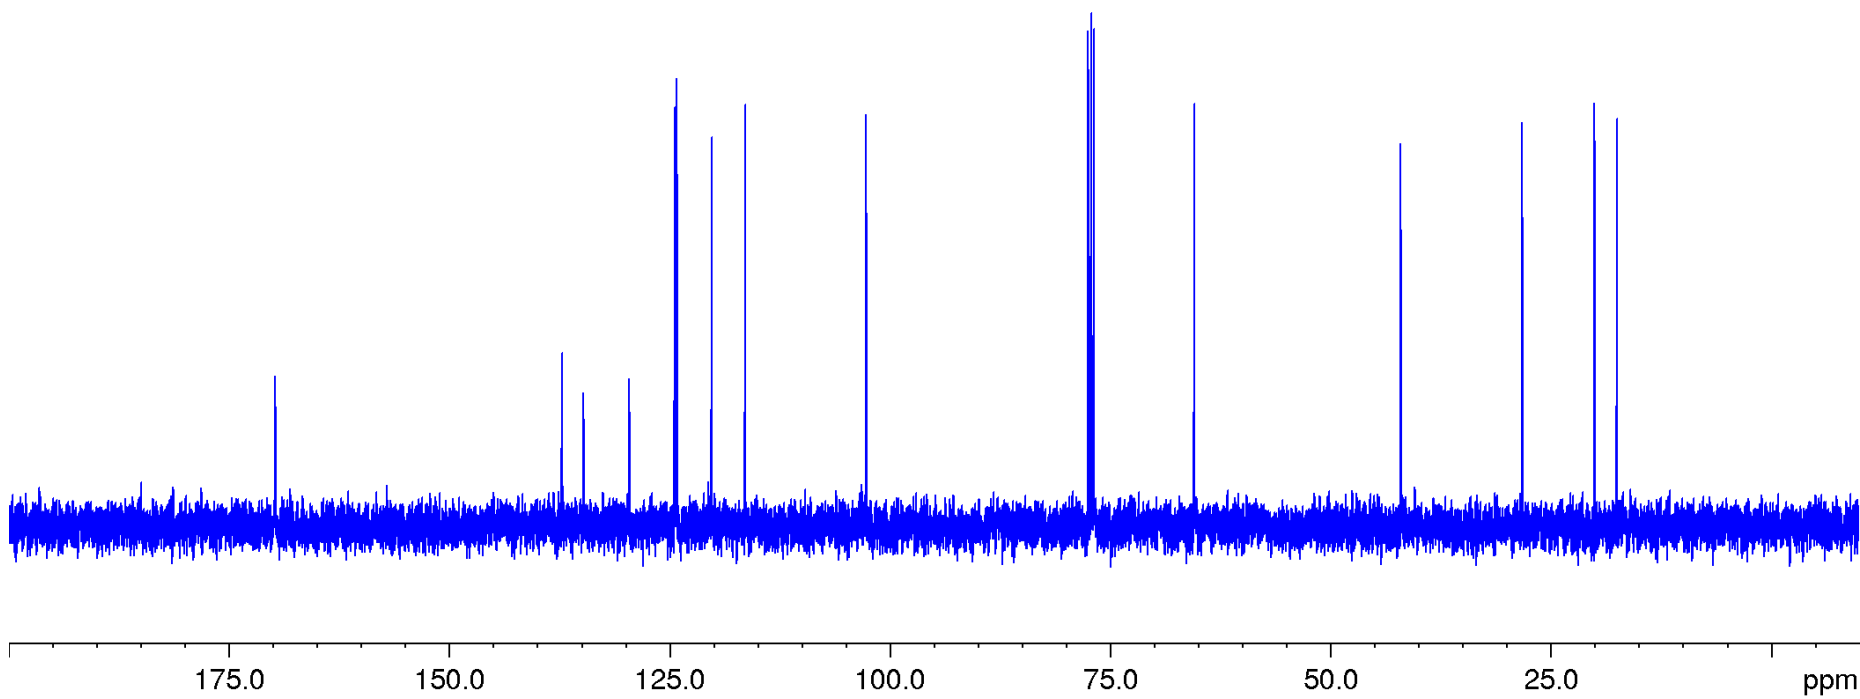

# DEPT 135 NMR-spectrum (CDCl<sub>3</sub>)

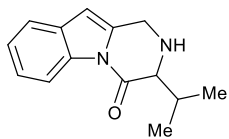

5c

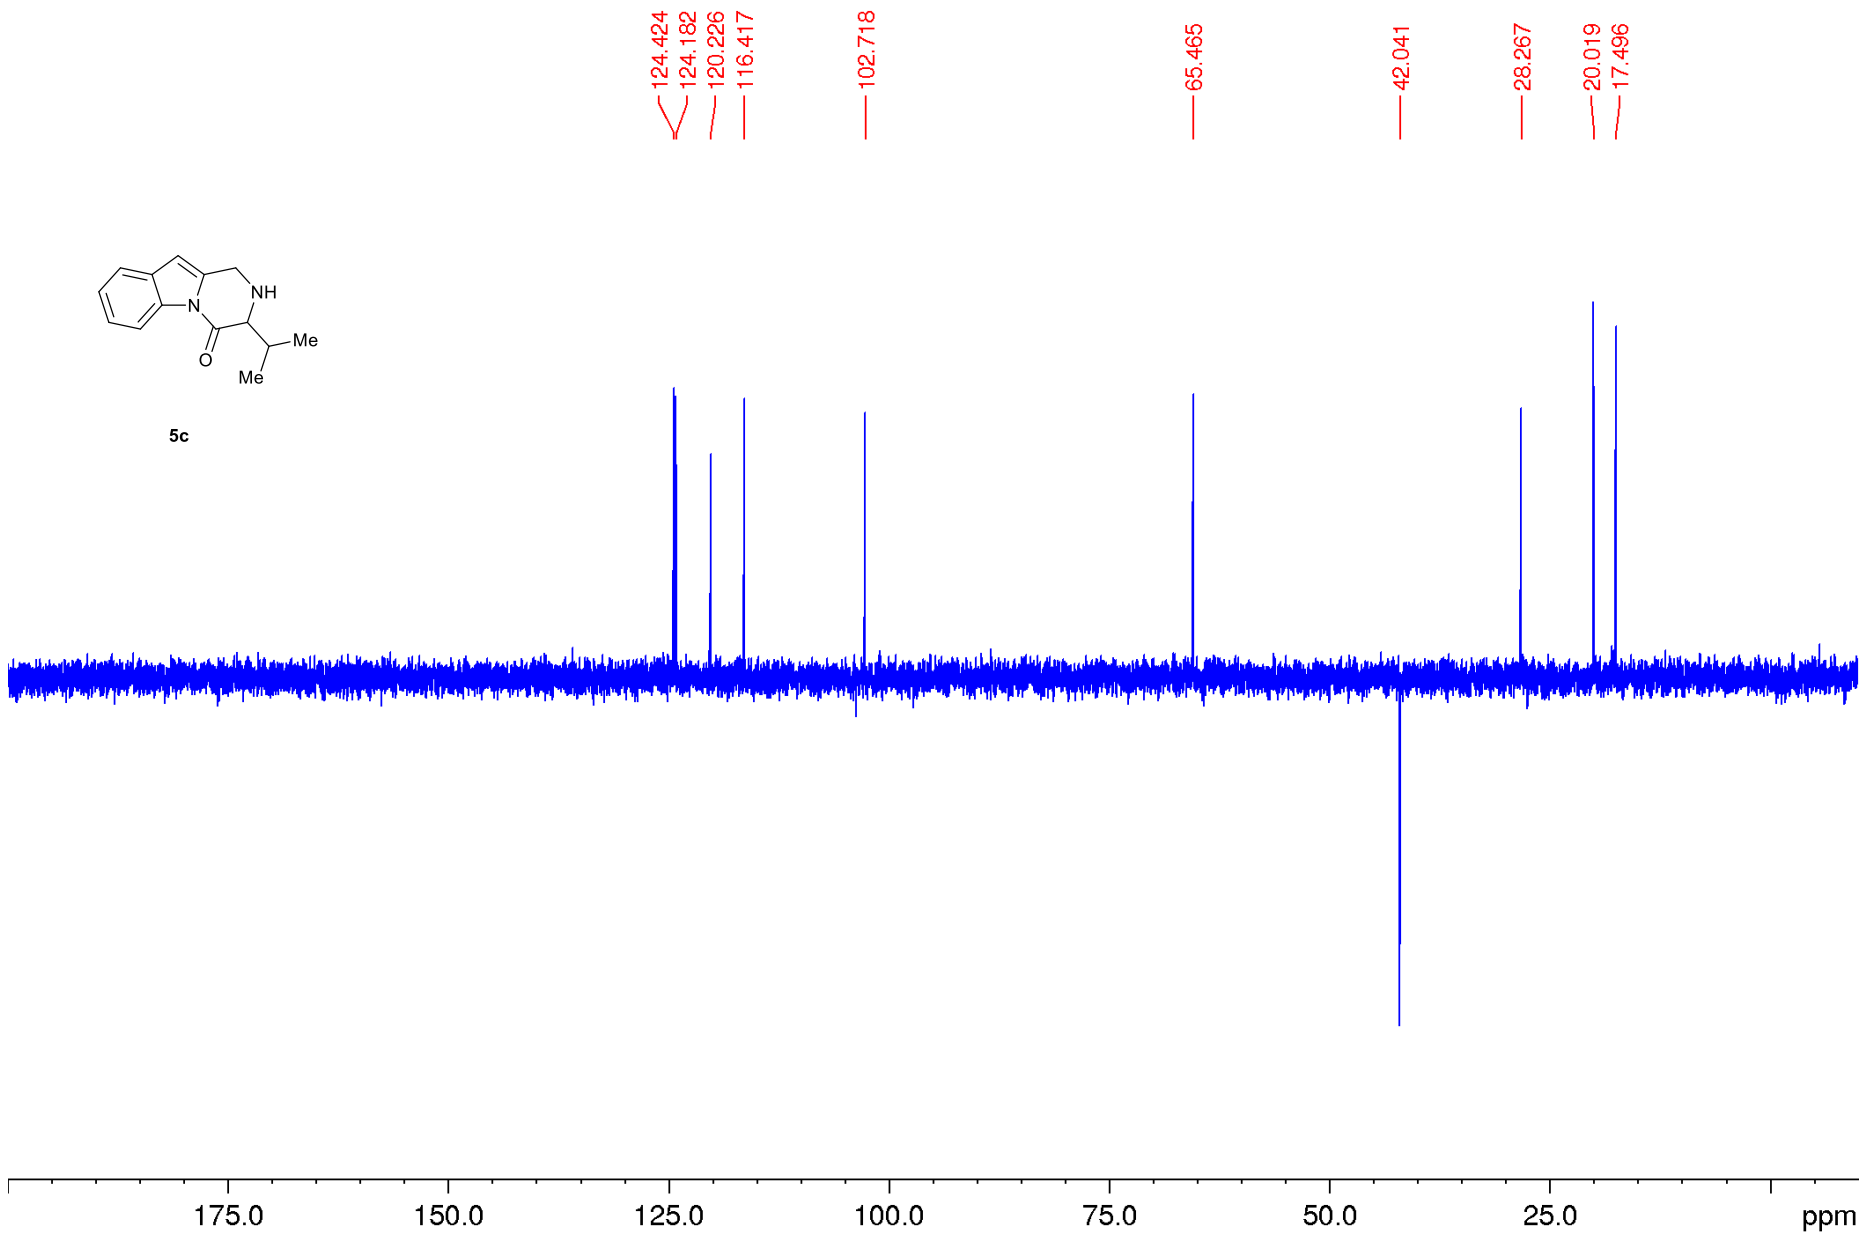



# <sup>1</sup>H NMR-spectrum (400.13 MHz) (CDCl<sub>3</sub>)

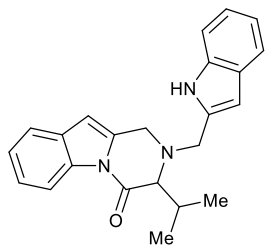

8c

8.505  
8.486  
8.318  
7.593  
7.574  
7.549  
7.531  
7.402  
7.389  
7.382  
7.373  
7.354  
7.351  
7.338  
7.336  
7.320  
7.301  
7.284  
7.284  
7.216  
7.197  
7.151  
7.133  
7.114  
6.348

4.325  
4.282  
3.987  
3.953  
3.927  
3.919  
3.893  
3.876  
3.150  
3.125  
2.273  
2.264  
2.257  
2.248  
2.240  
2.232  
2.224  
2.215  
2.199  
1.273  
1.257  
1.165  
1.149

*n*-hexane impurity due to the eluent phase of chromatography

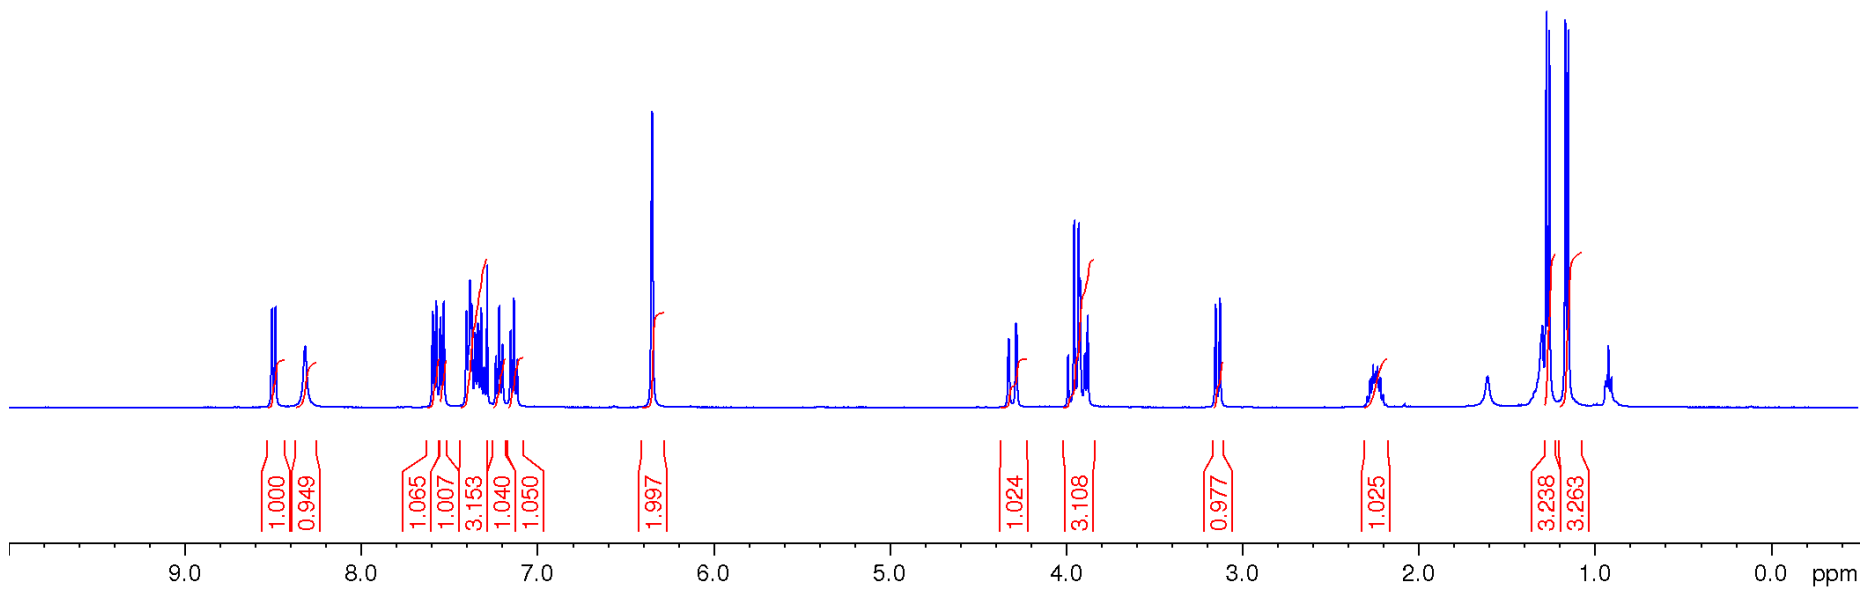

$^{13}\text{C}$  NMR-spectrum (100.6 MHz) ( $\text{CDCl}_3$ )

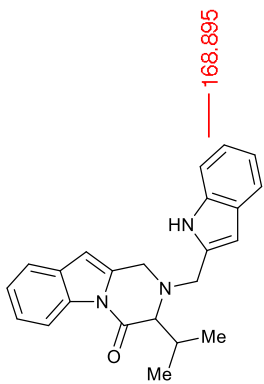

8c

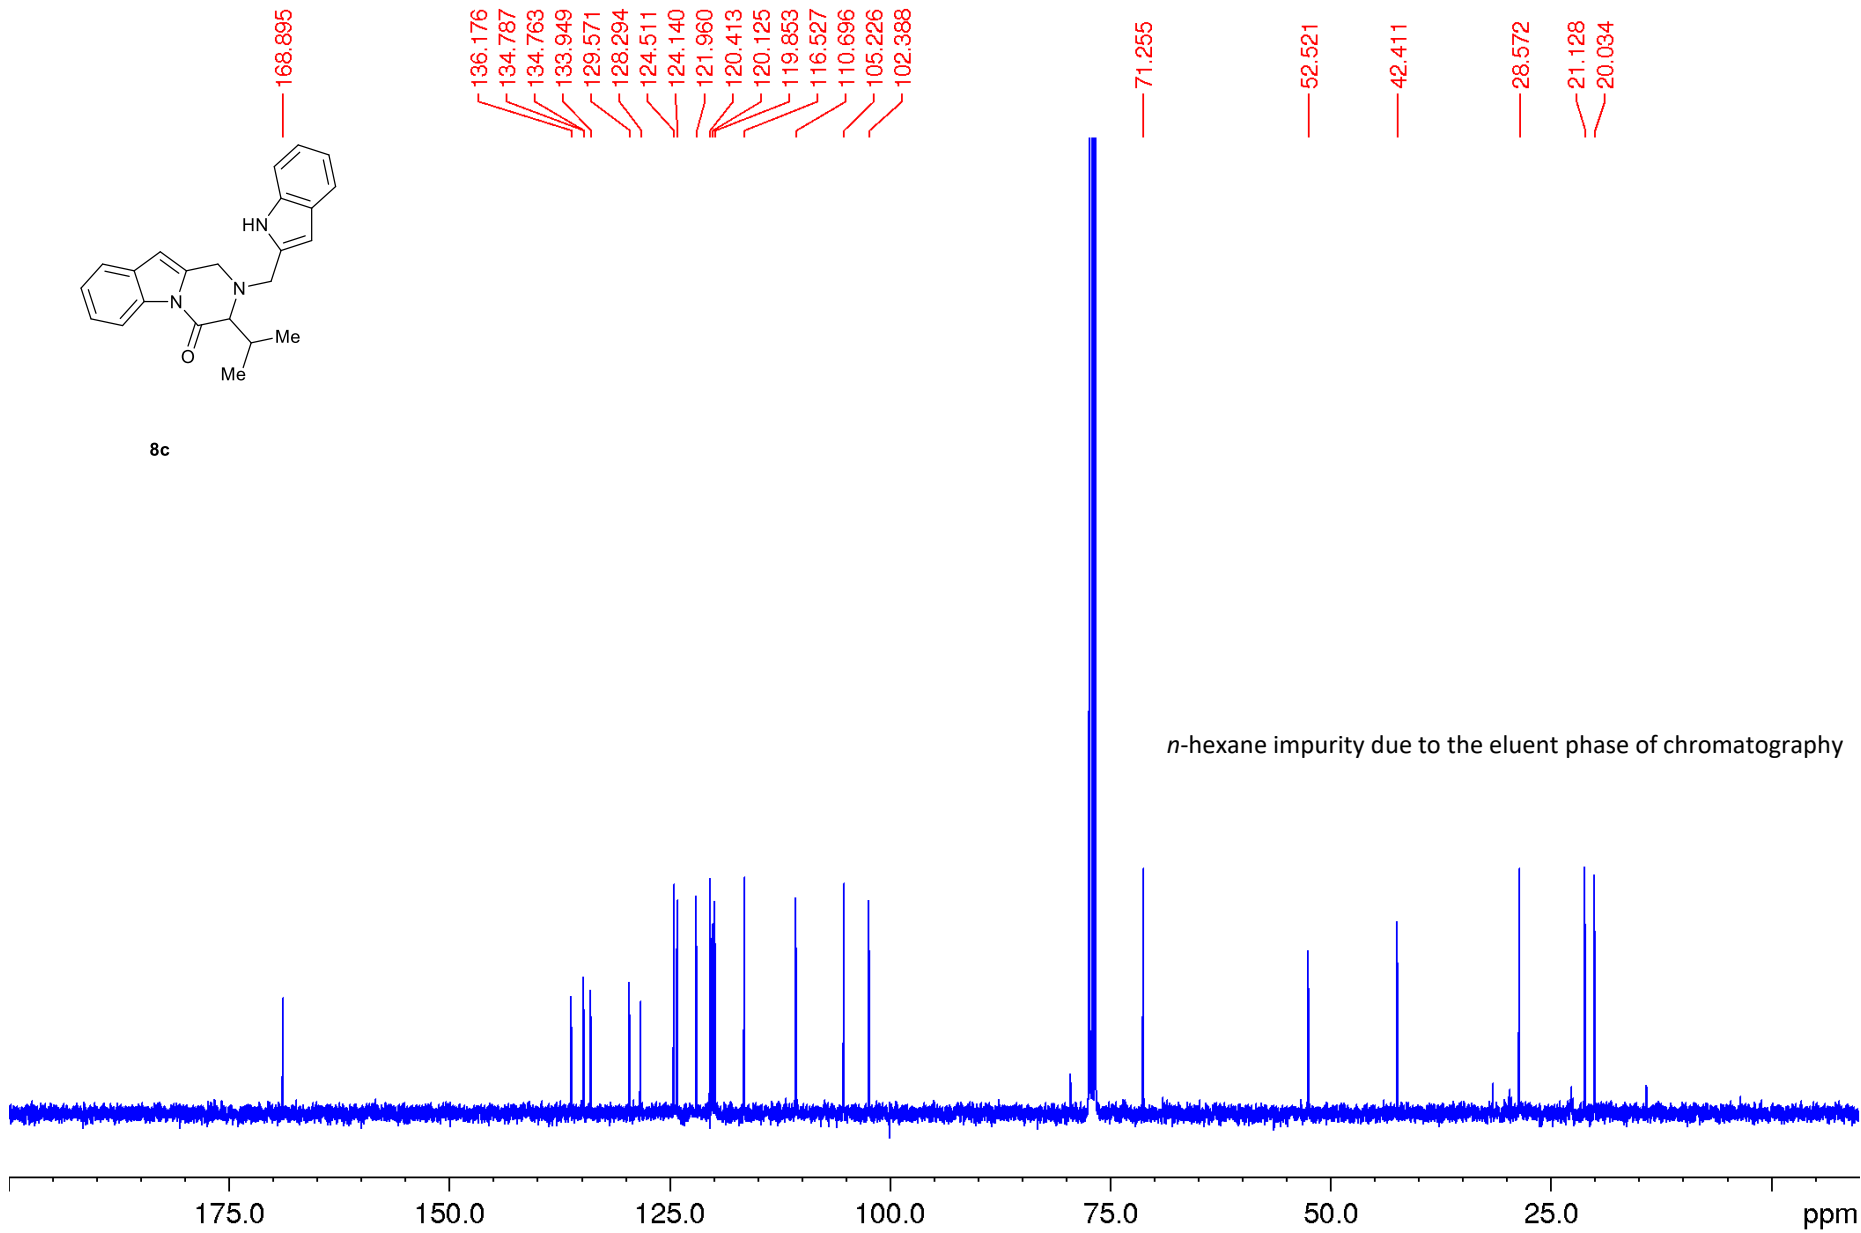

# DEPT 135 NMR-spectrum (CDCl<sub>3</sub>)

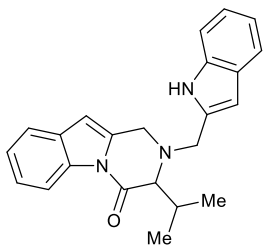

8c

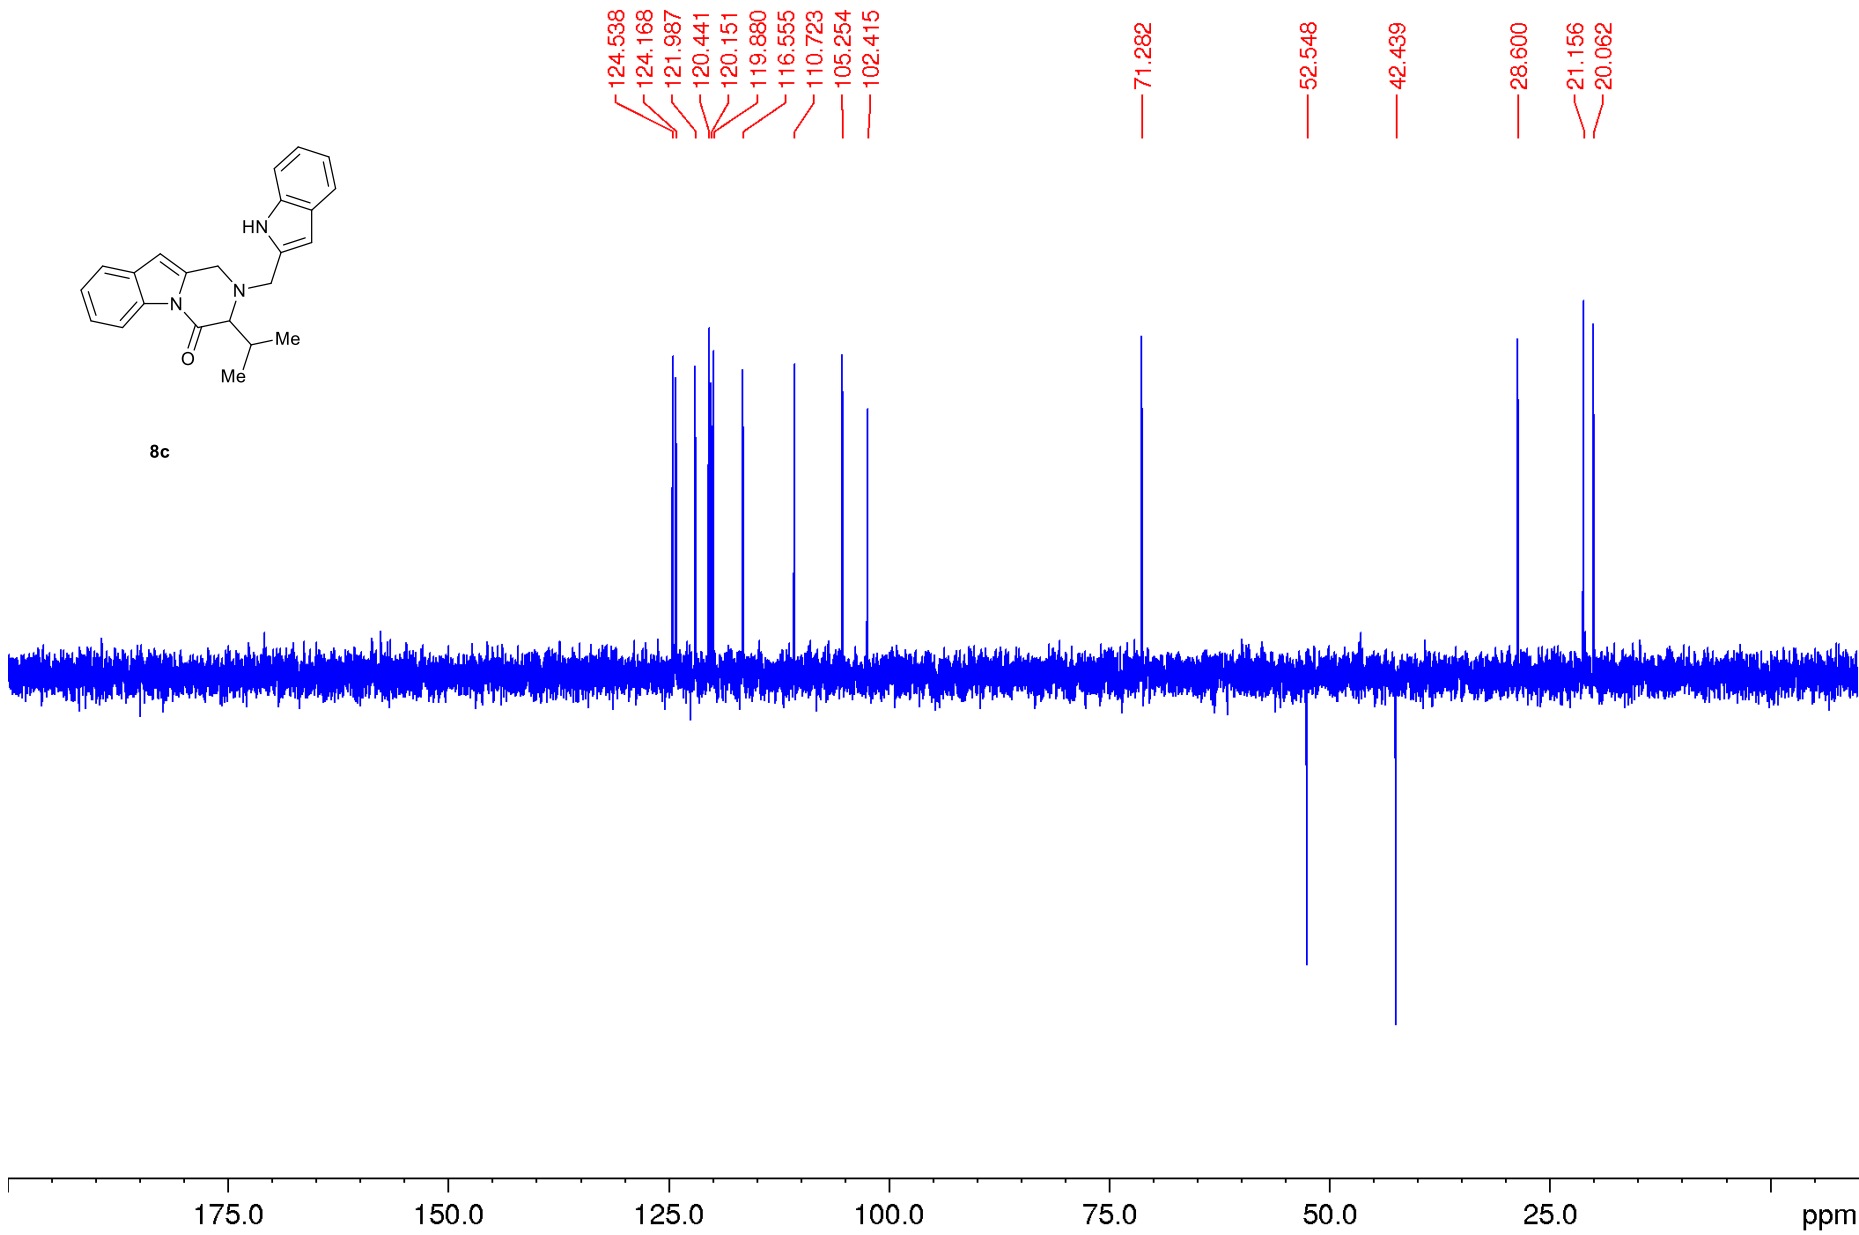

$^1\text{H}$  NMR-spectrum (400.13 MHz) ( $\text{CDCl}_3$ )

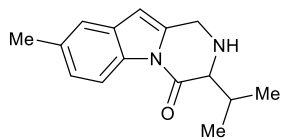

5d

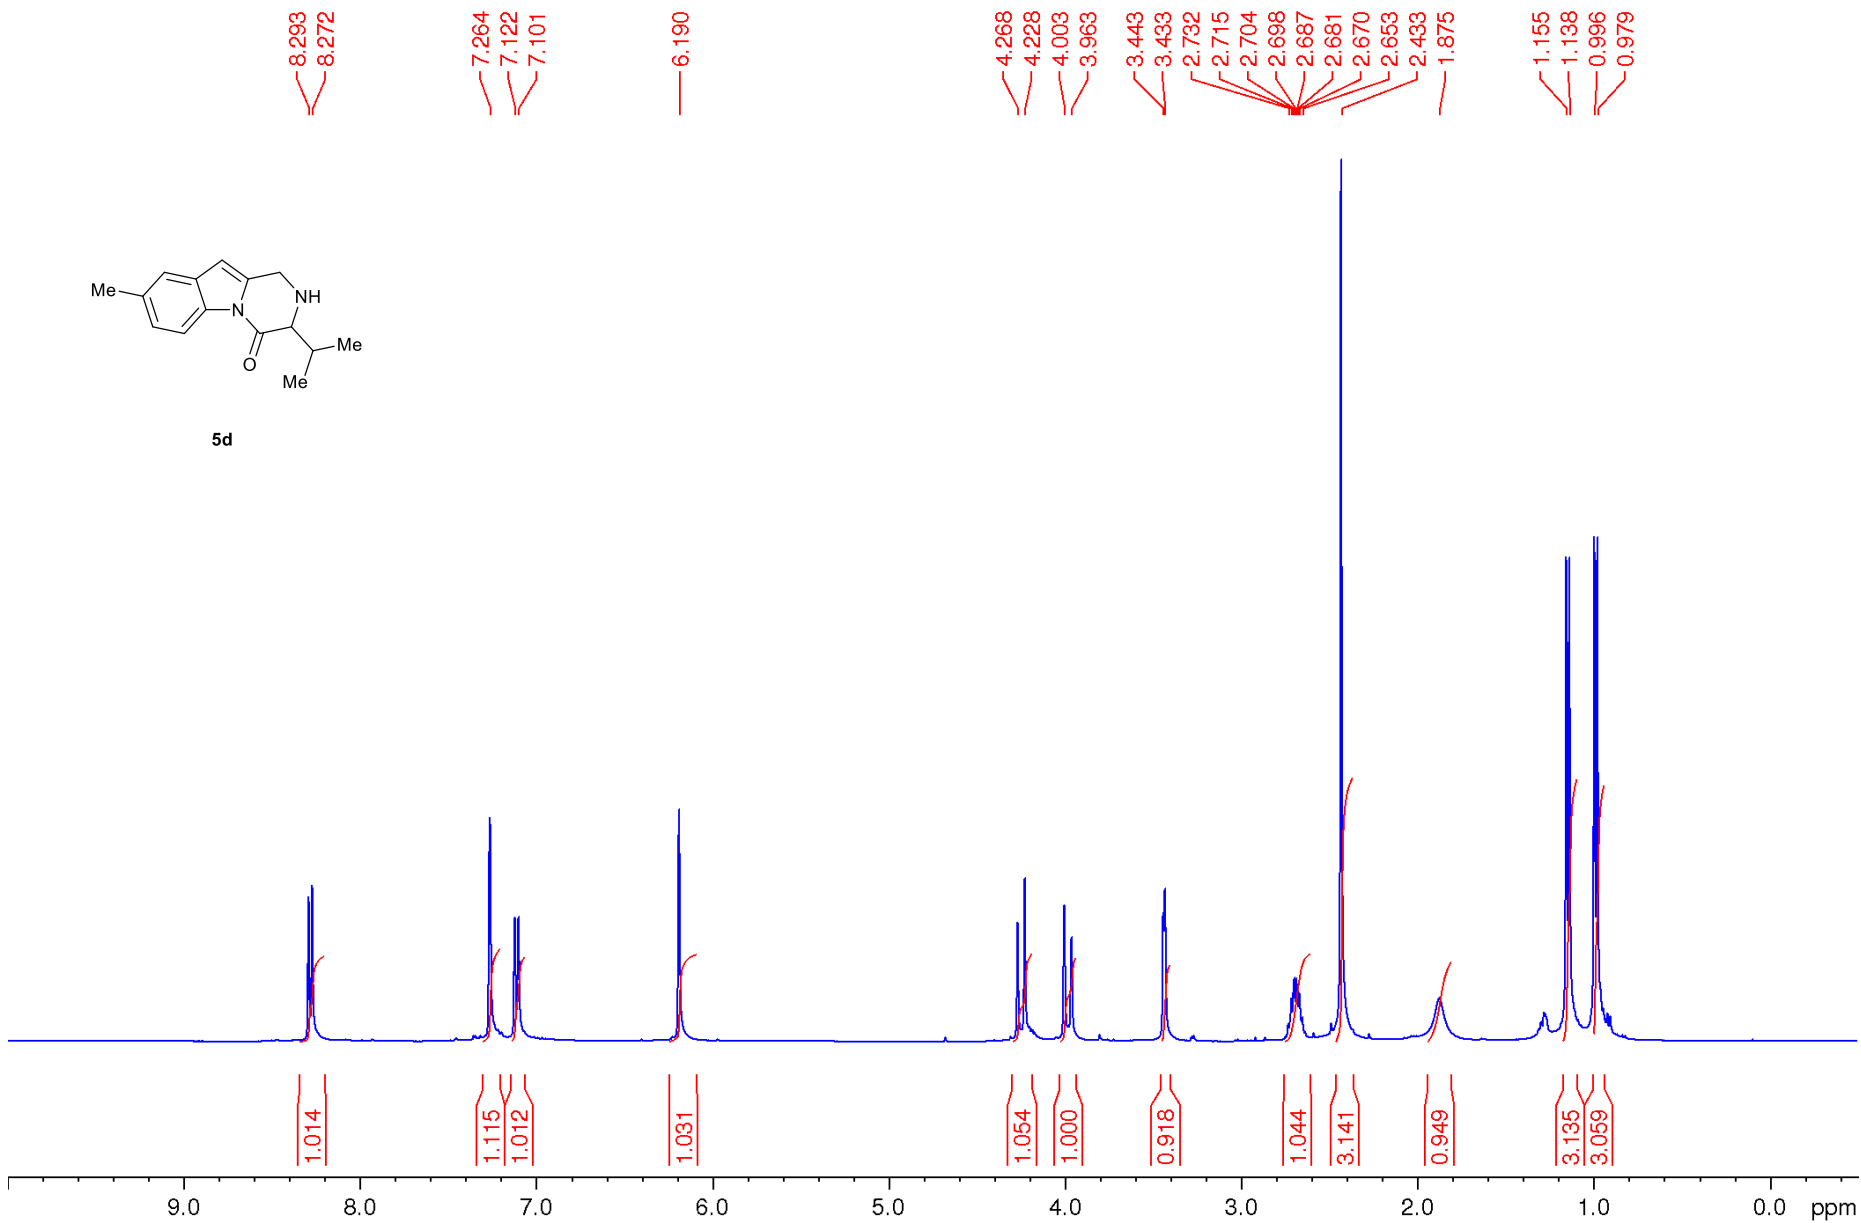

$^{13}\text{C}$  NMR-spectrum (100.6 MHz) ( $\text{CDCl}_3$ )



5d

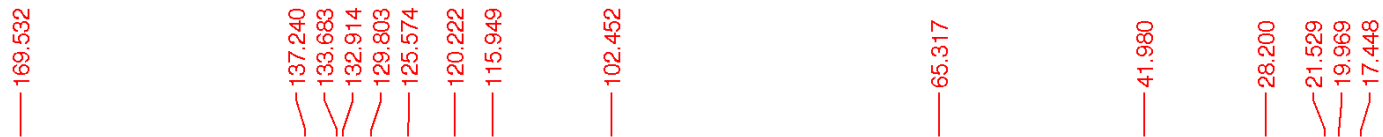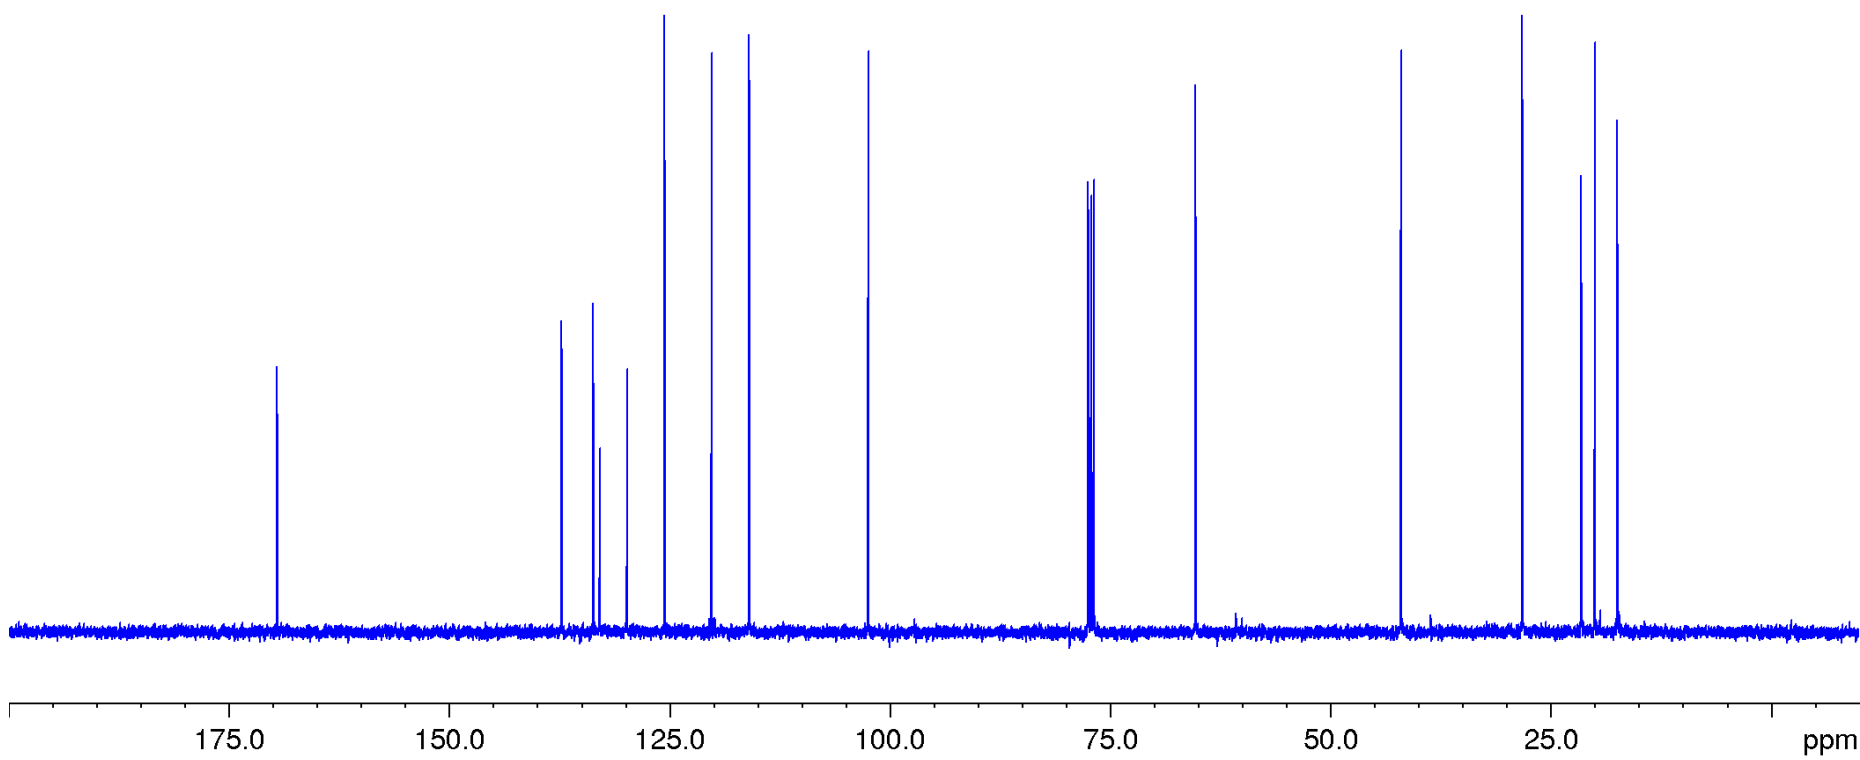

# DEPT 135 NMR-spectrum (CDCl<sub>3</sub>)

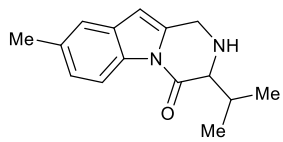

5d

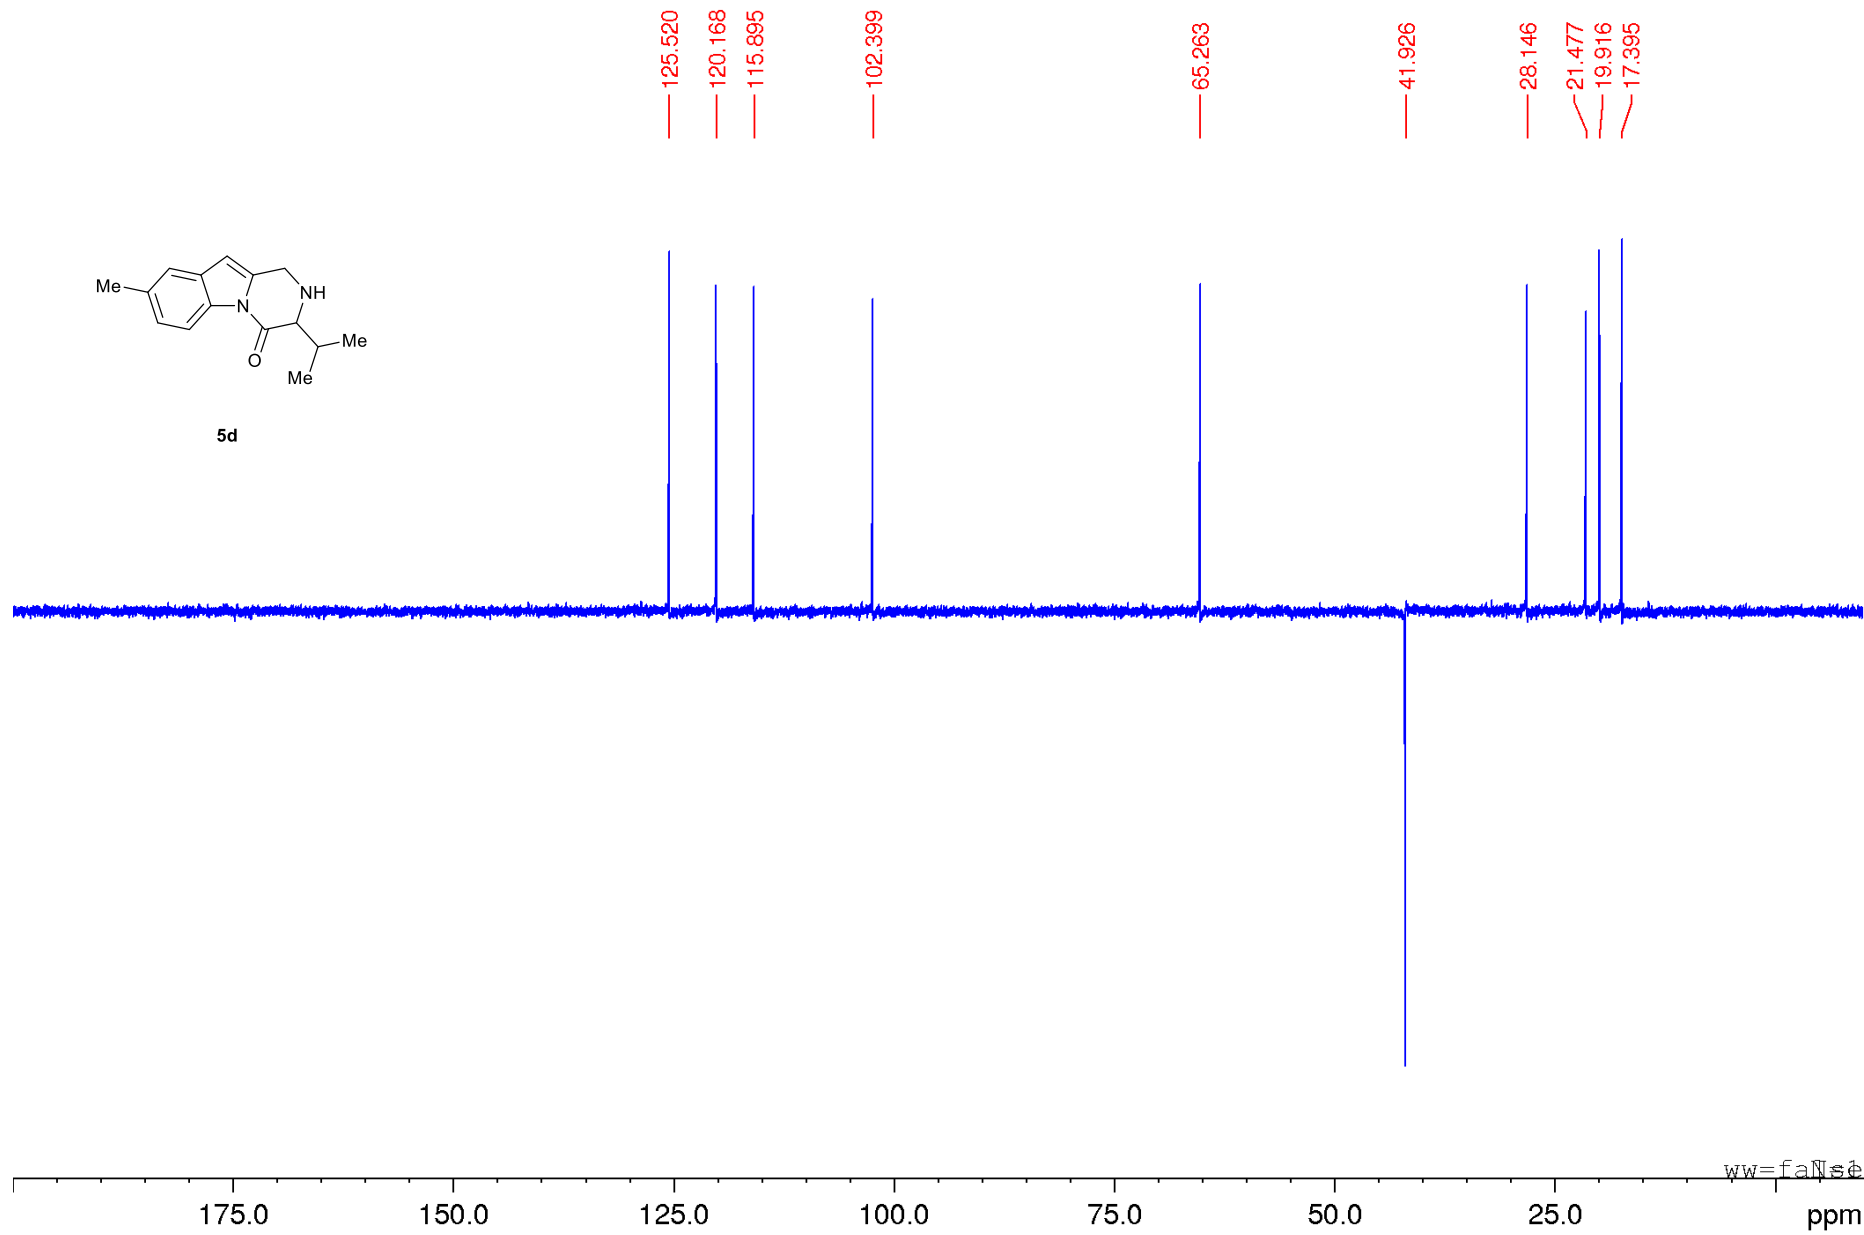

ww=false

ppm

# $^1\text{H}$ NMR-spectrum (400.13 MHz) ( $\text{CDCl}_3$ )

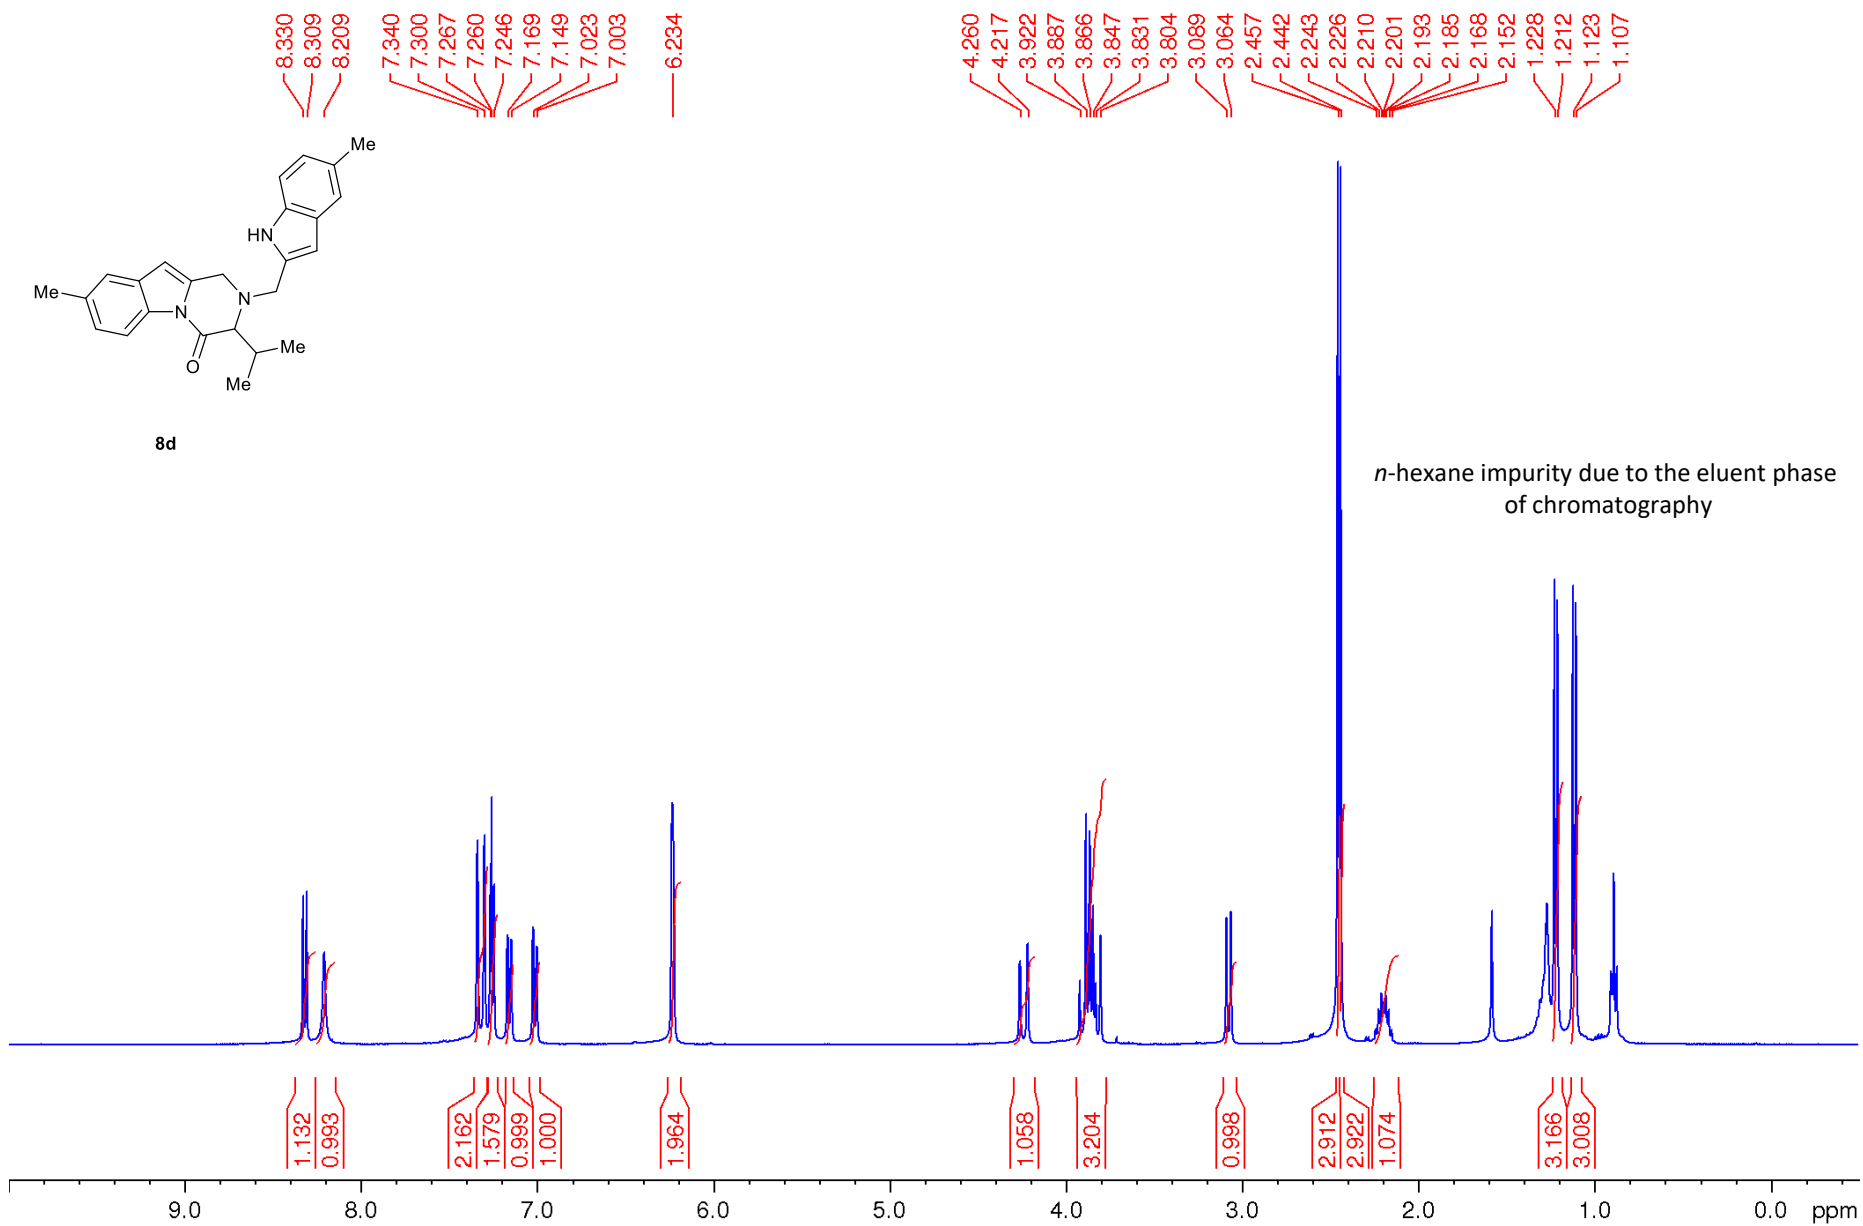

# $^{13}\text{C}$ NMR-spectrum (100.6 MHz) ( $\text{CDCl}_3$ )

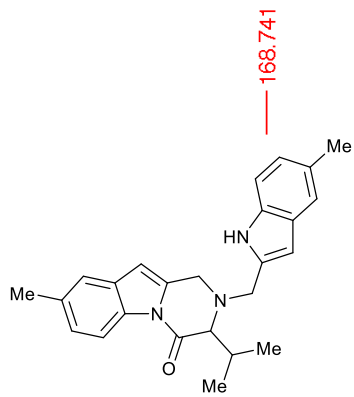

8d

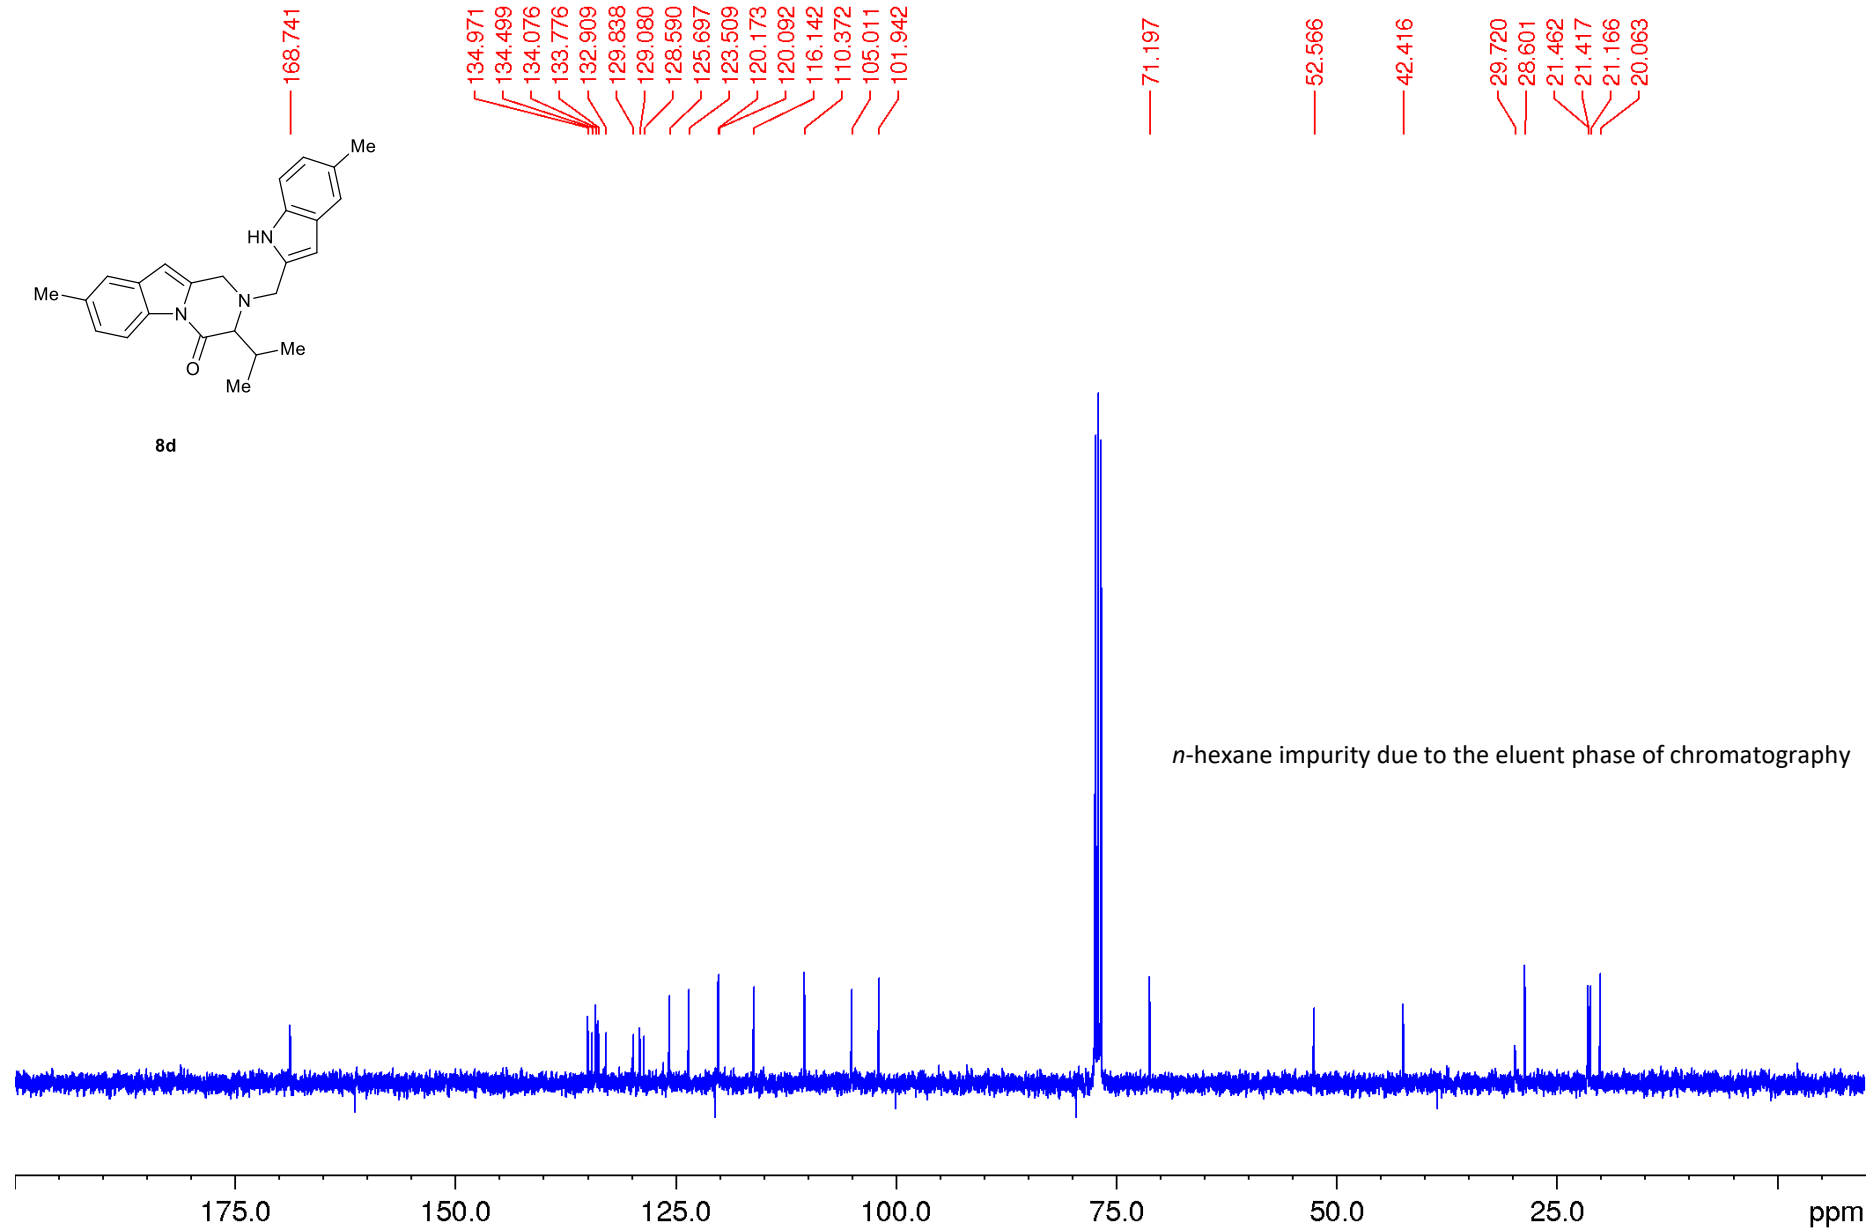



# DEPT 135 NMR-spectrum (CDCl<sub>3</sub>)

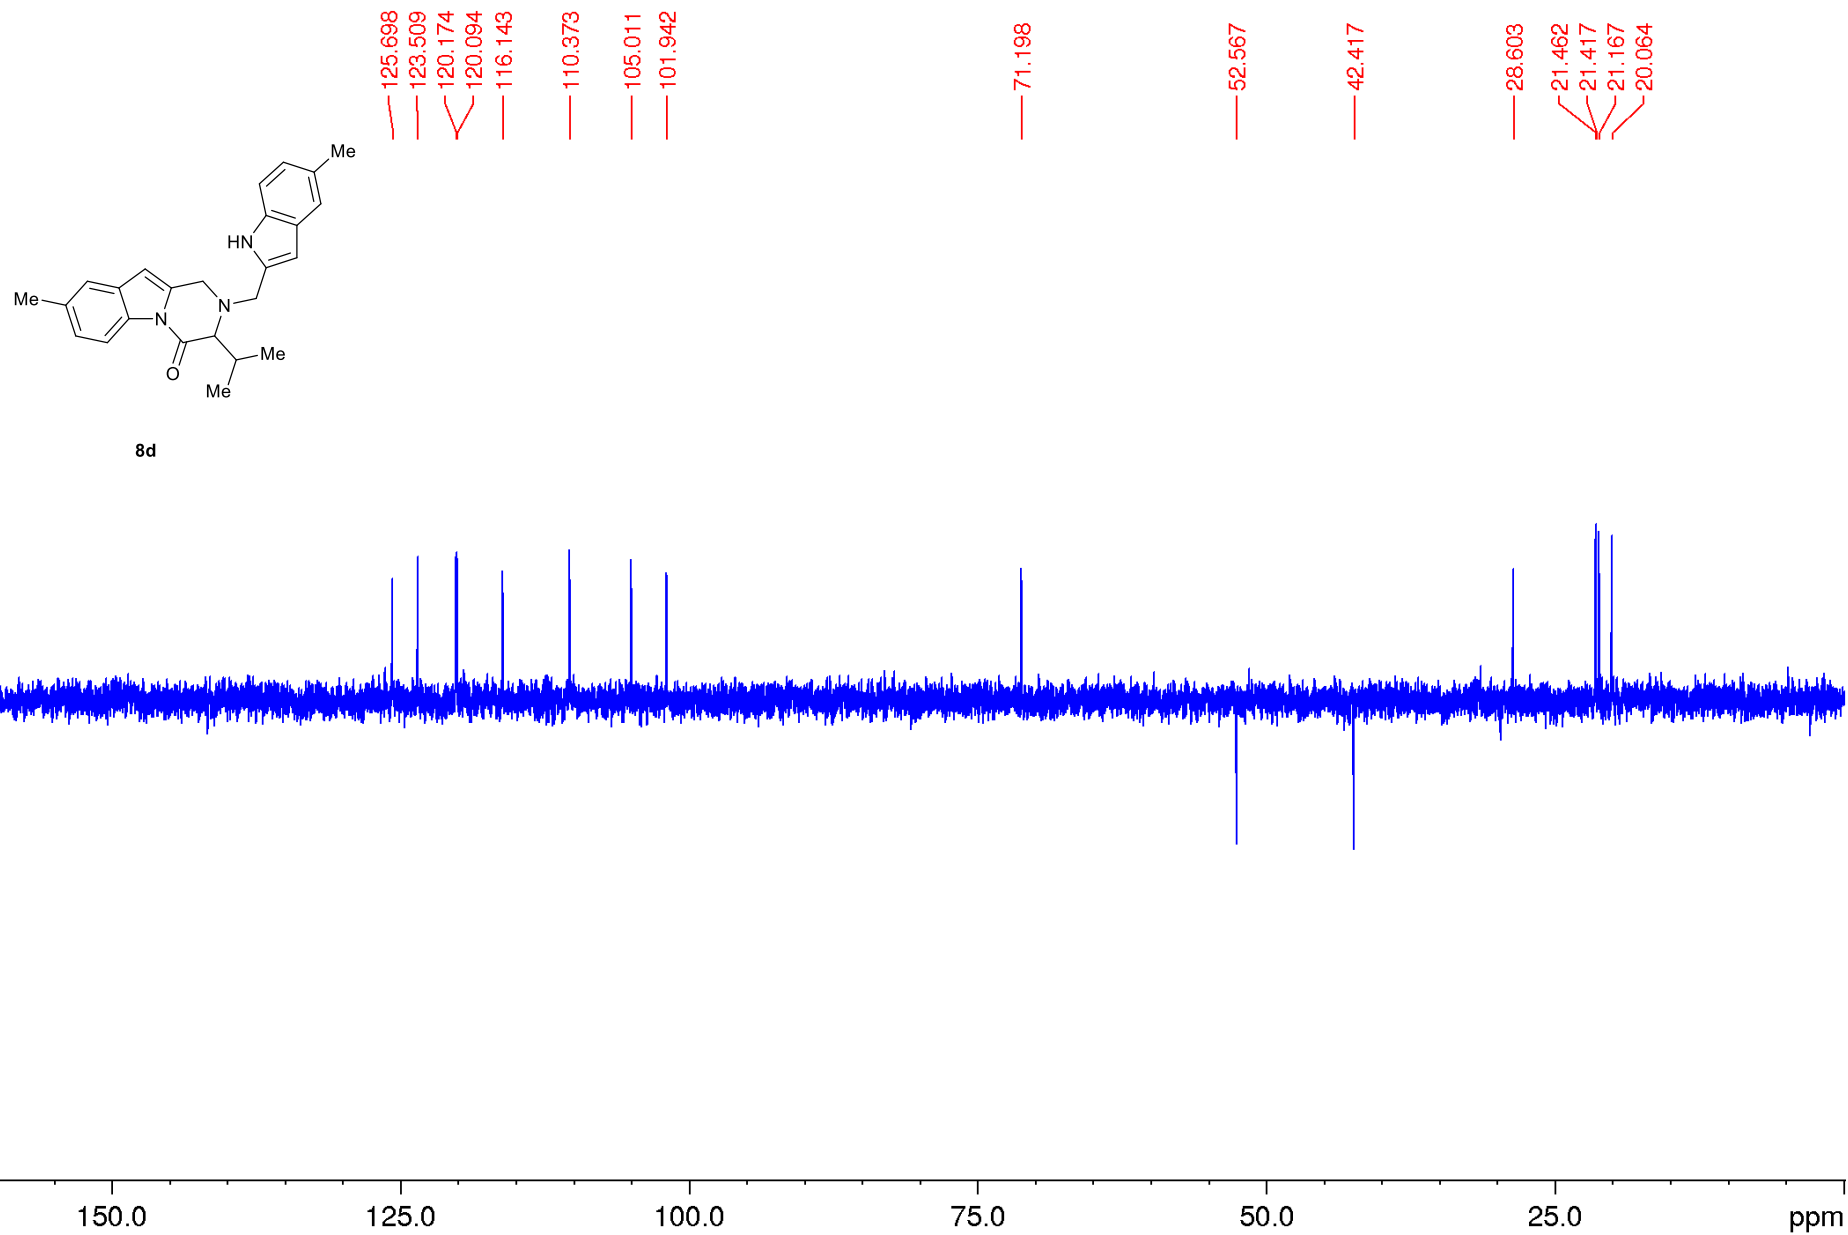

# <sup>1</sup>H NMR-spectrum (400.13 MHz) (CDCl<sub>3</sub>)

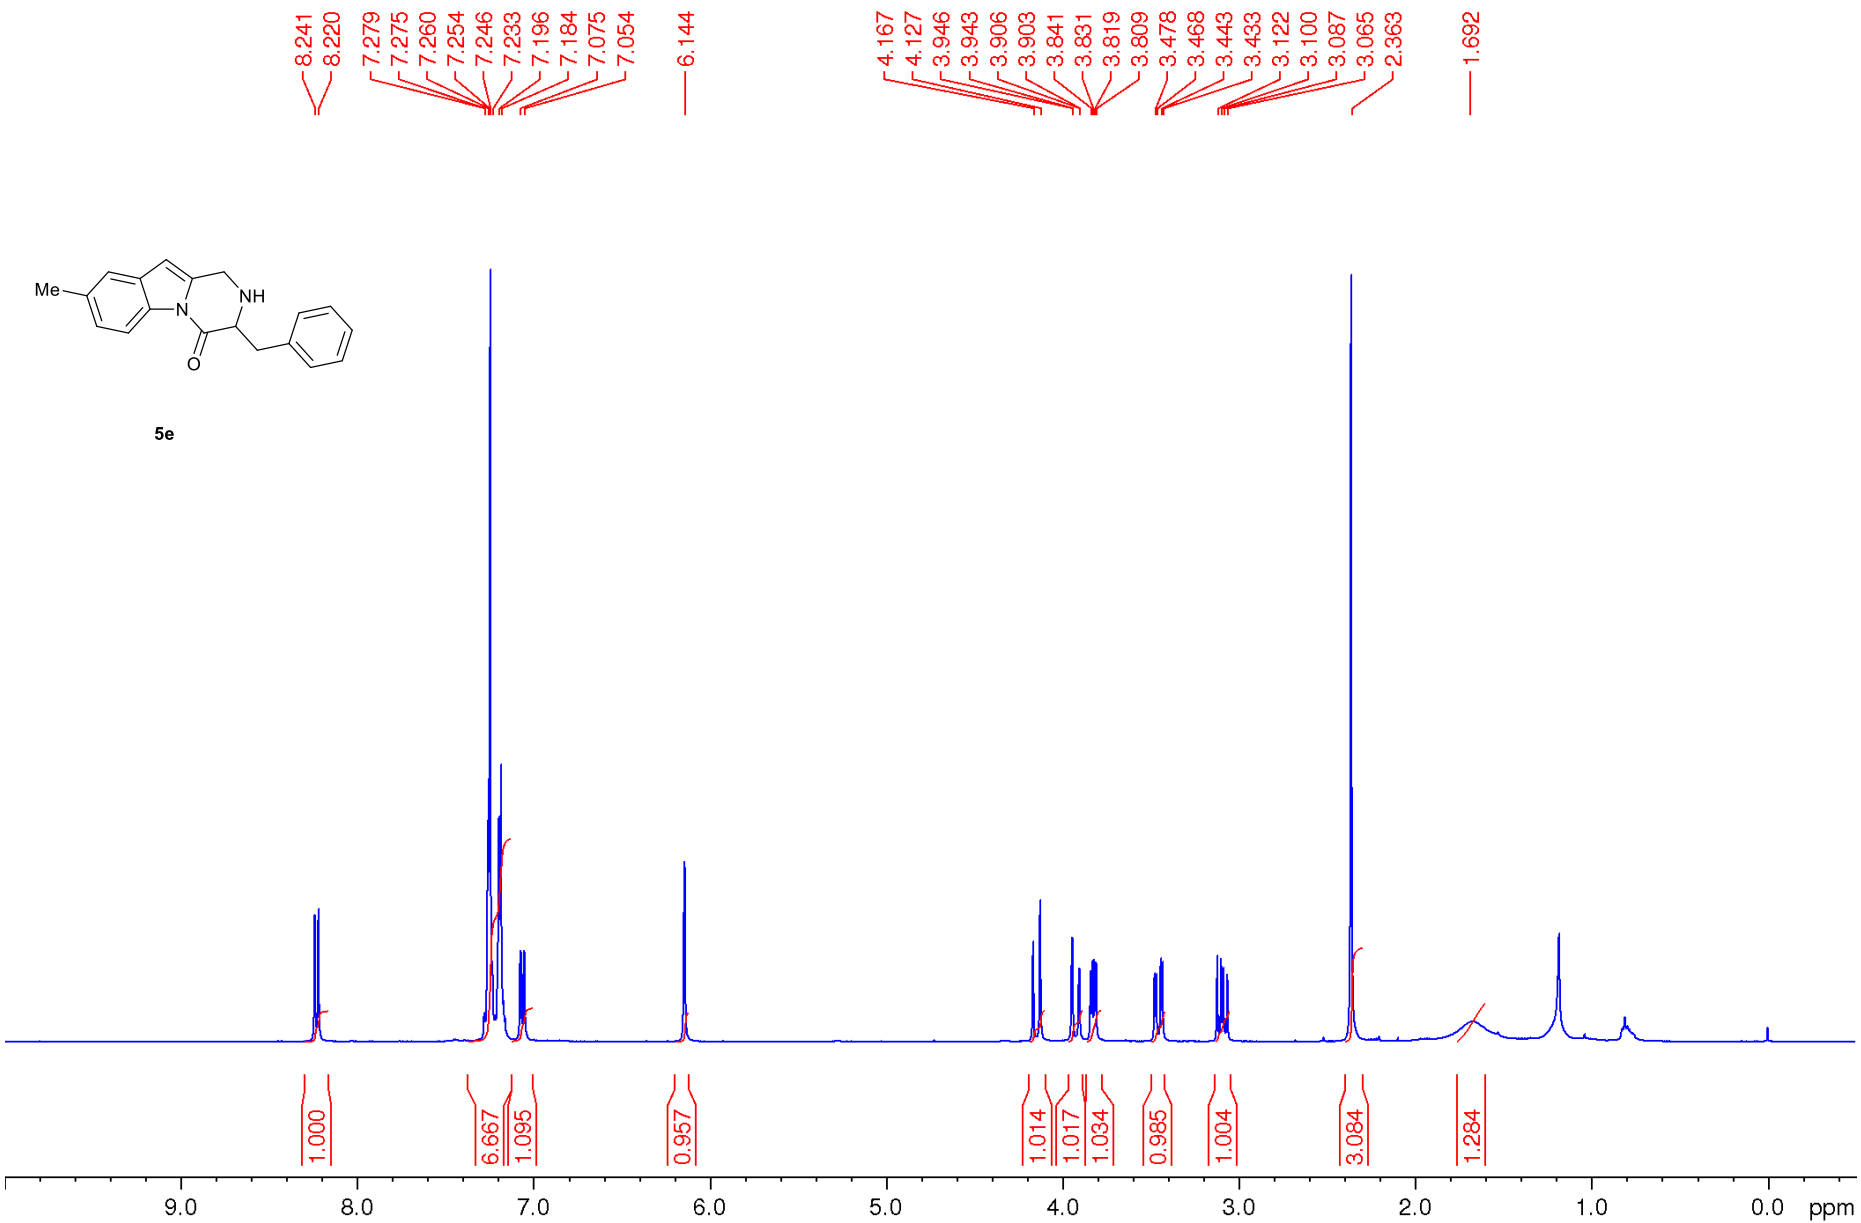

$^{13}\text{C}$  NMR-spectrum (100.6 MHz) ( $\text{CDCl}_3$ )

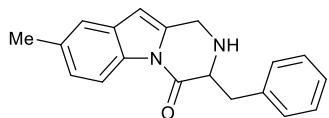

5e

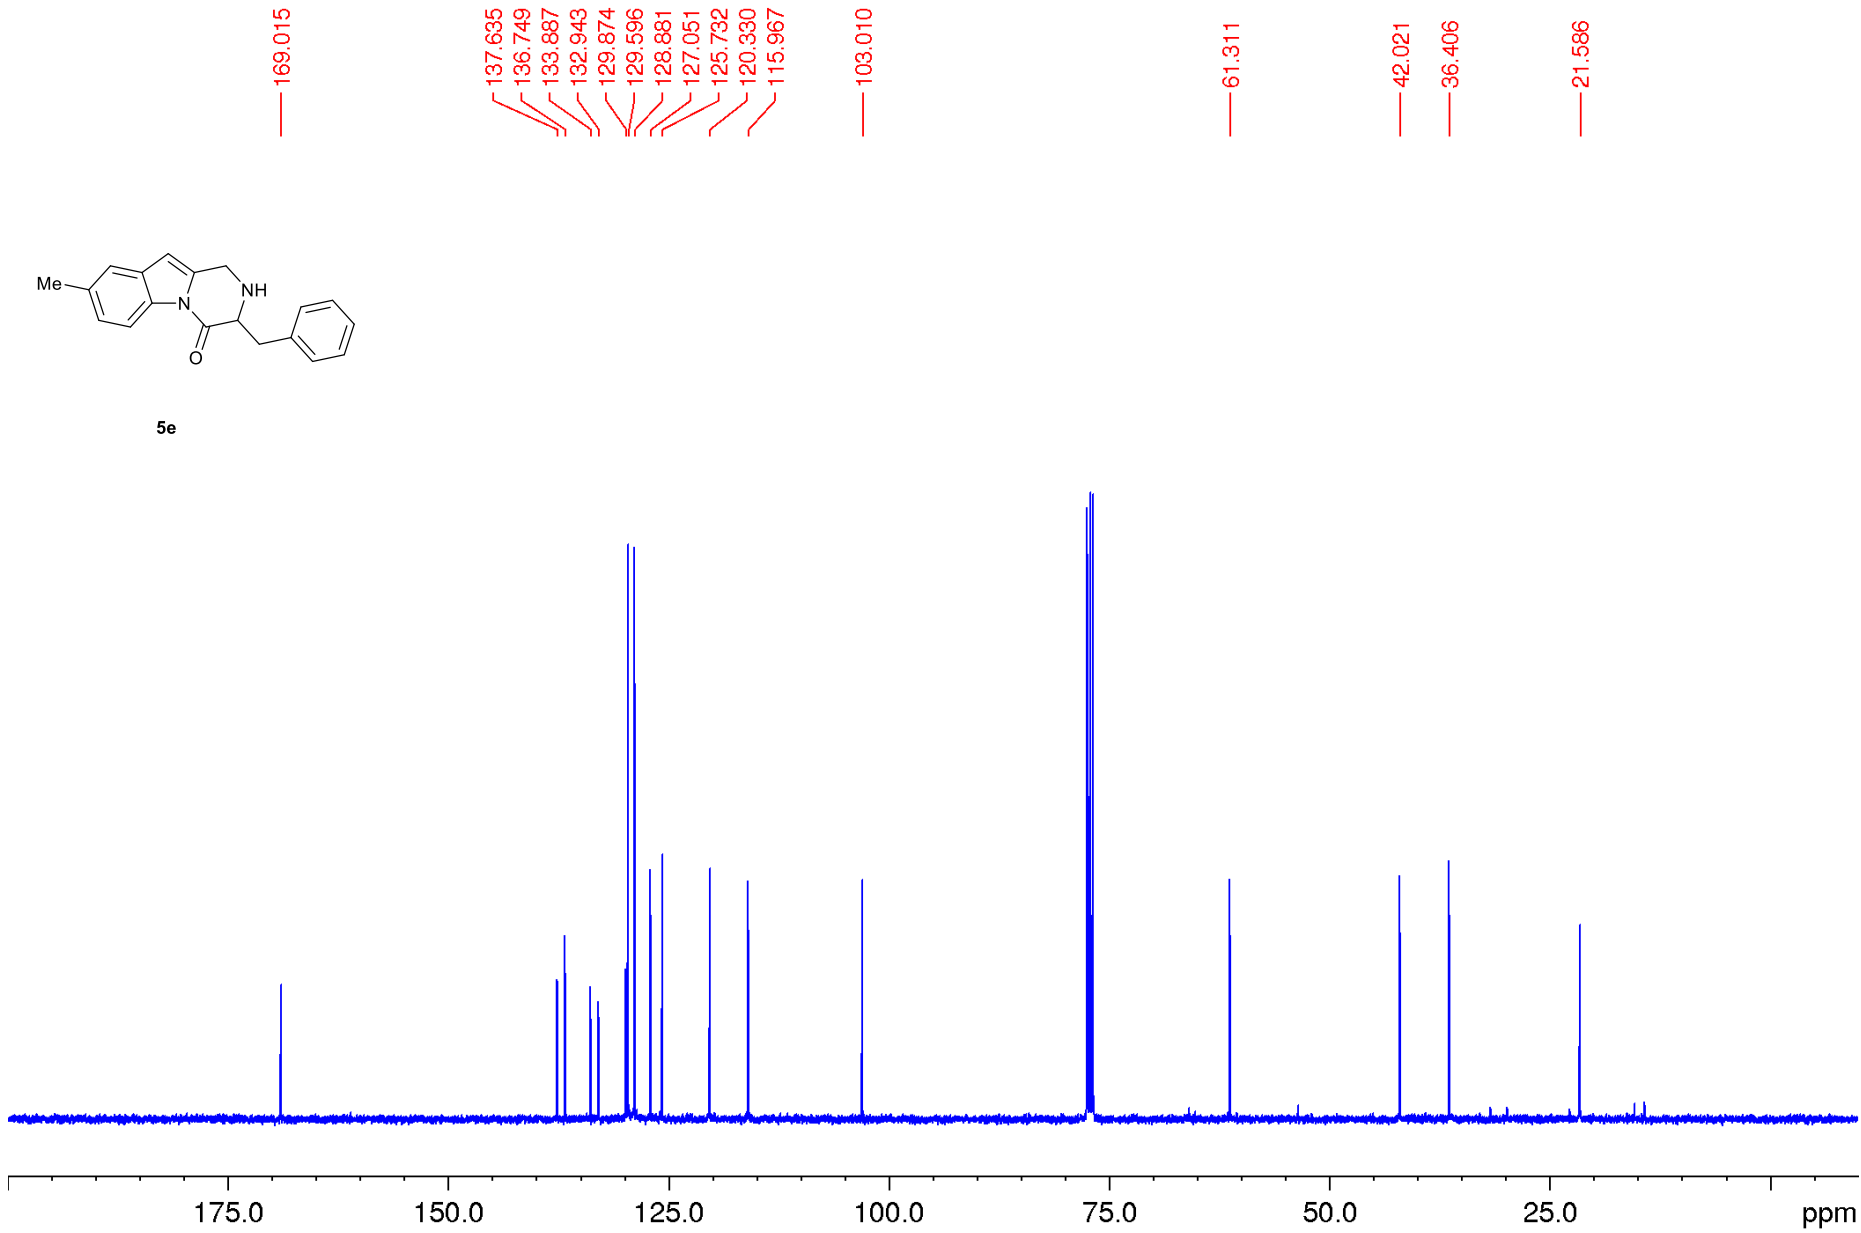

# DEPT 135 NMR-spectrum (CDCl<sub>3</sub>)



5e

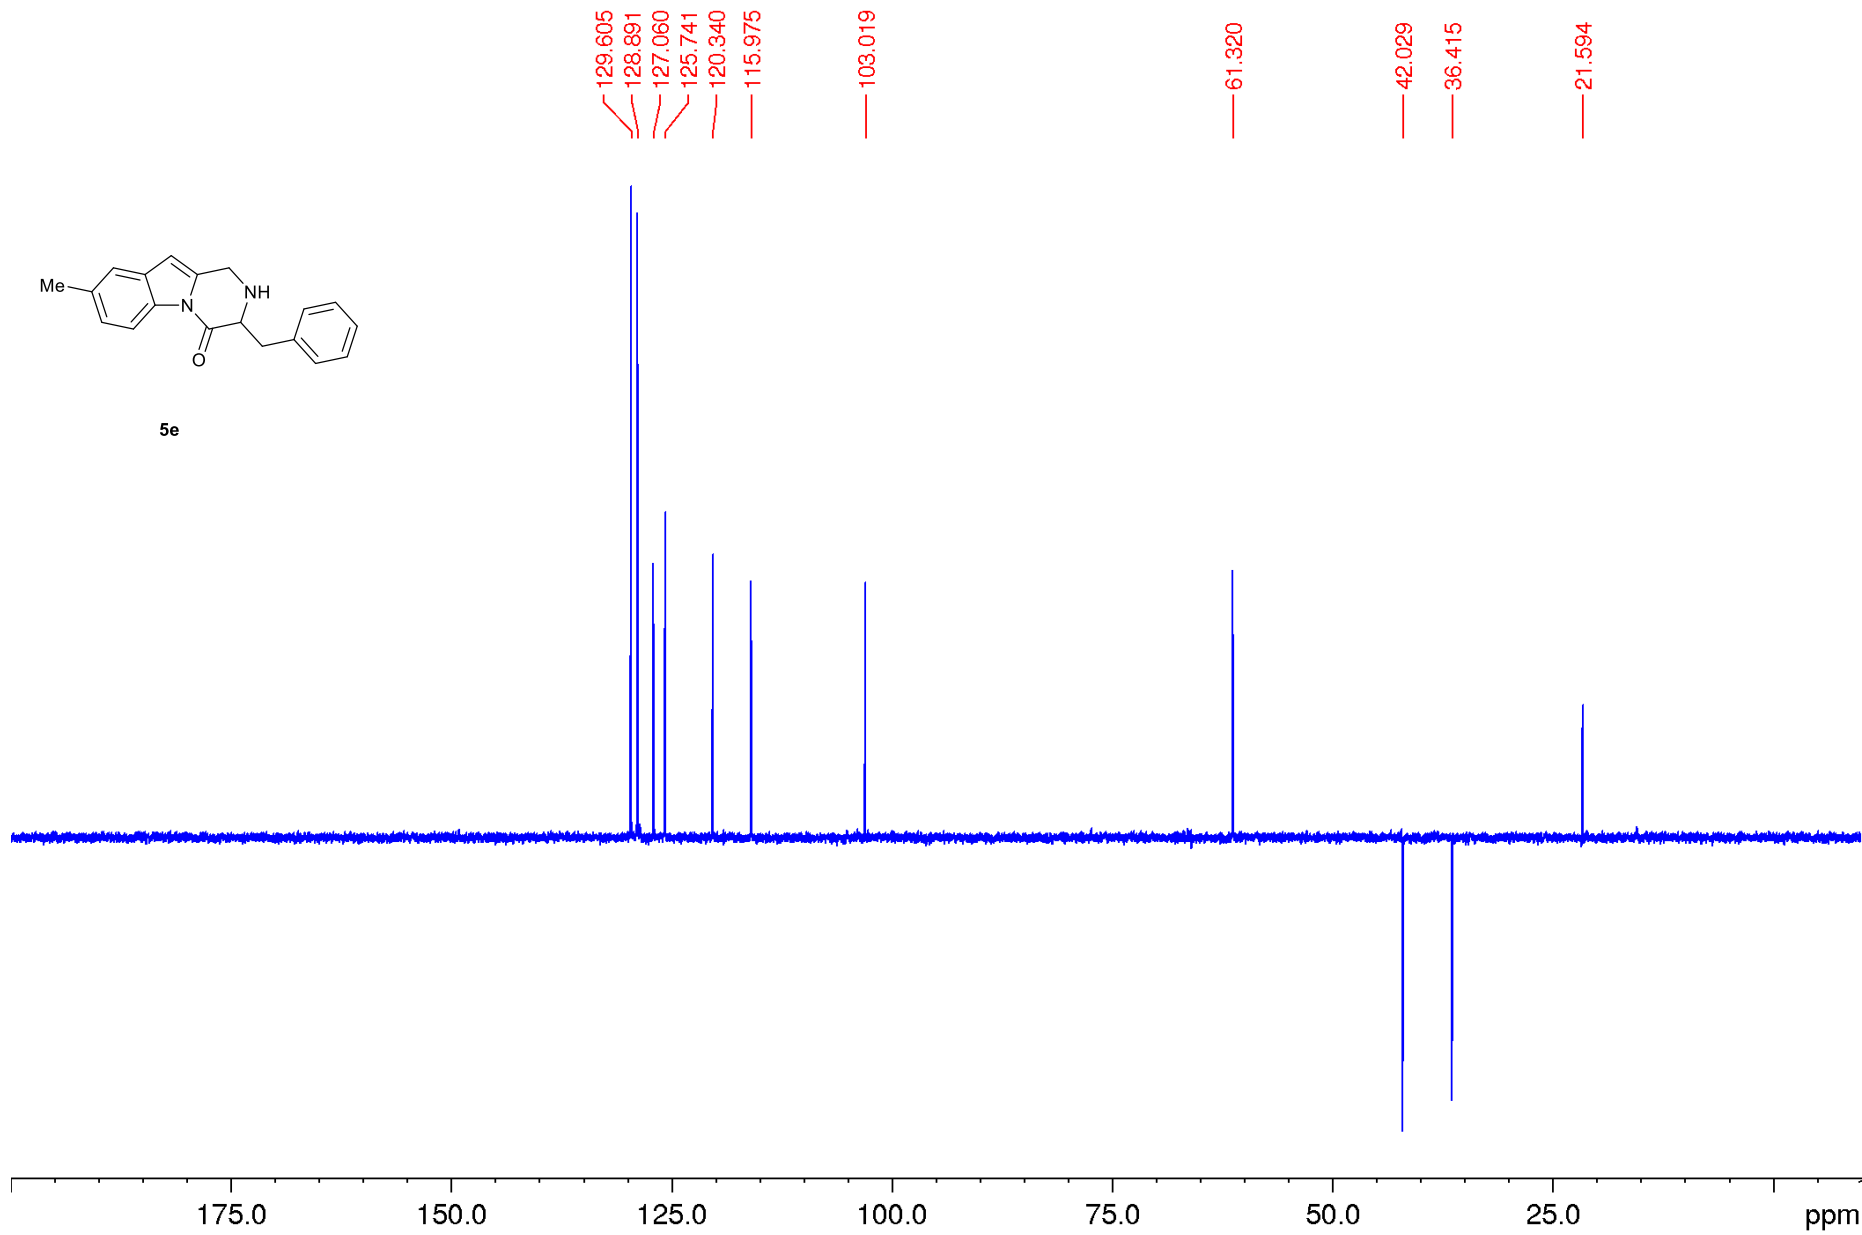

# <sup>1</sup>H NMR-spectrum (400.13 MHz) (CDCl<sub>3</sub>)

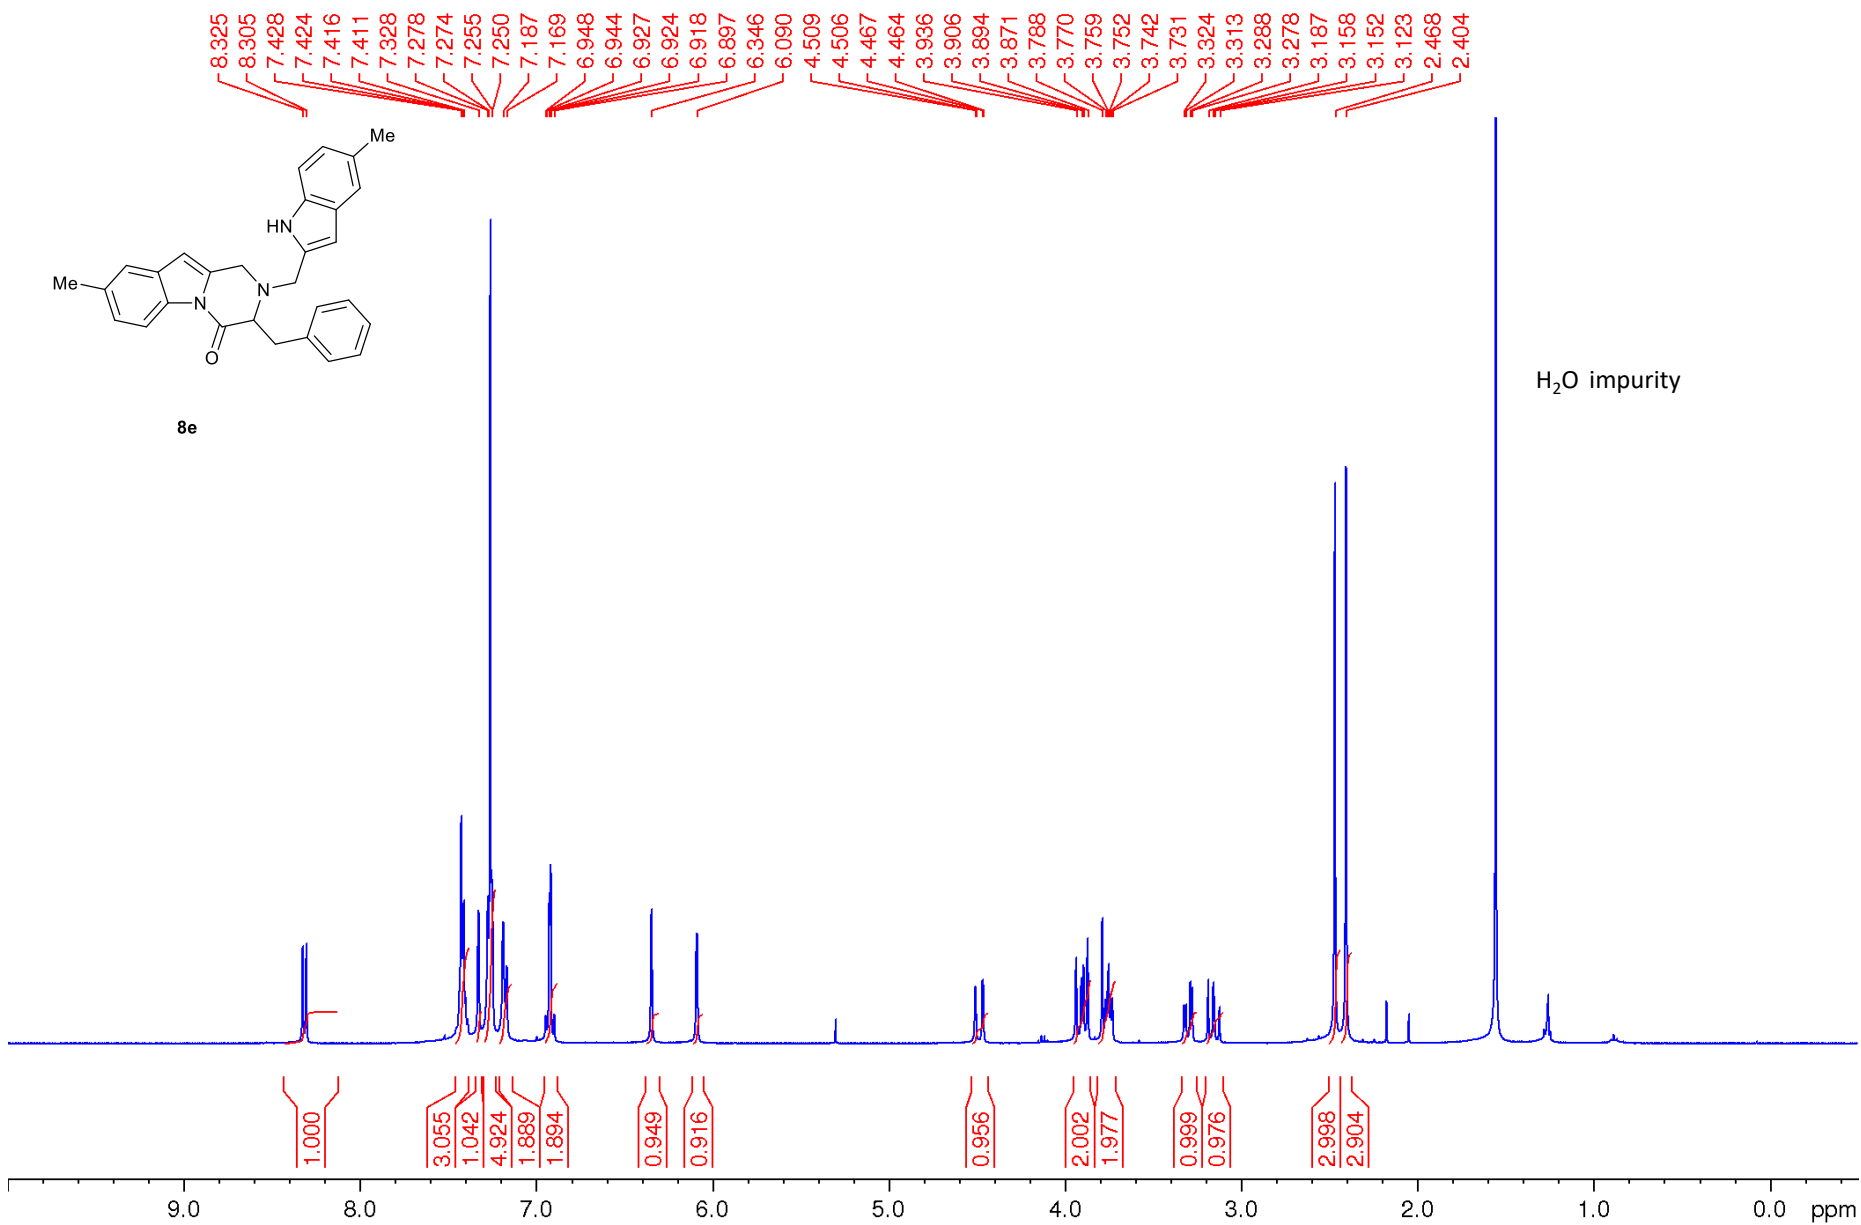

$^{13}\text{C}$  NMR-spectrum (100.6 MHz) ( $\text{CDCl}_3$ )

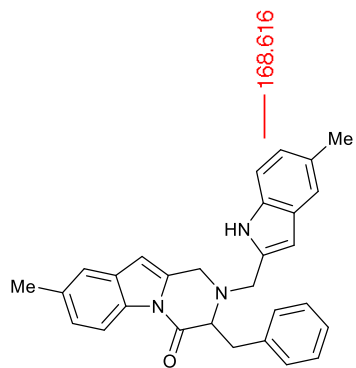

8e

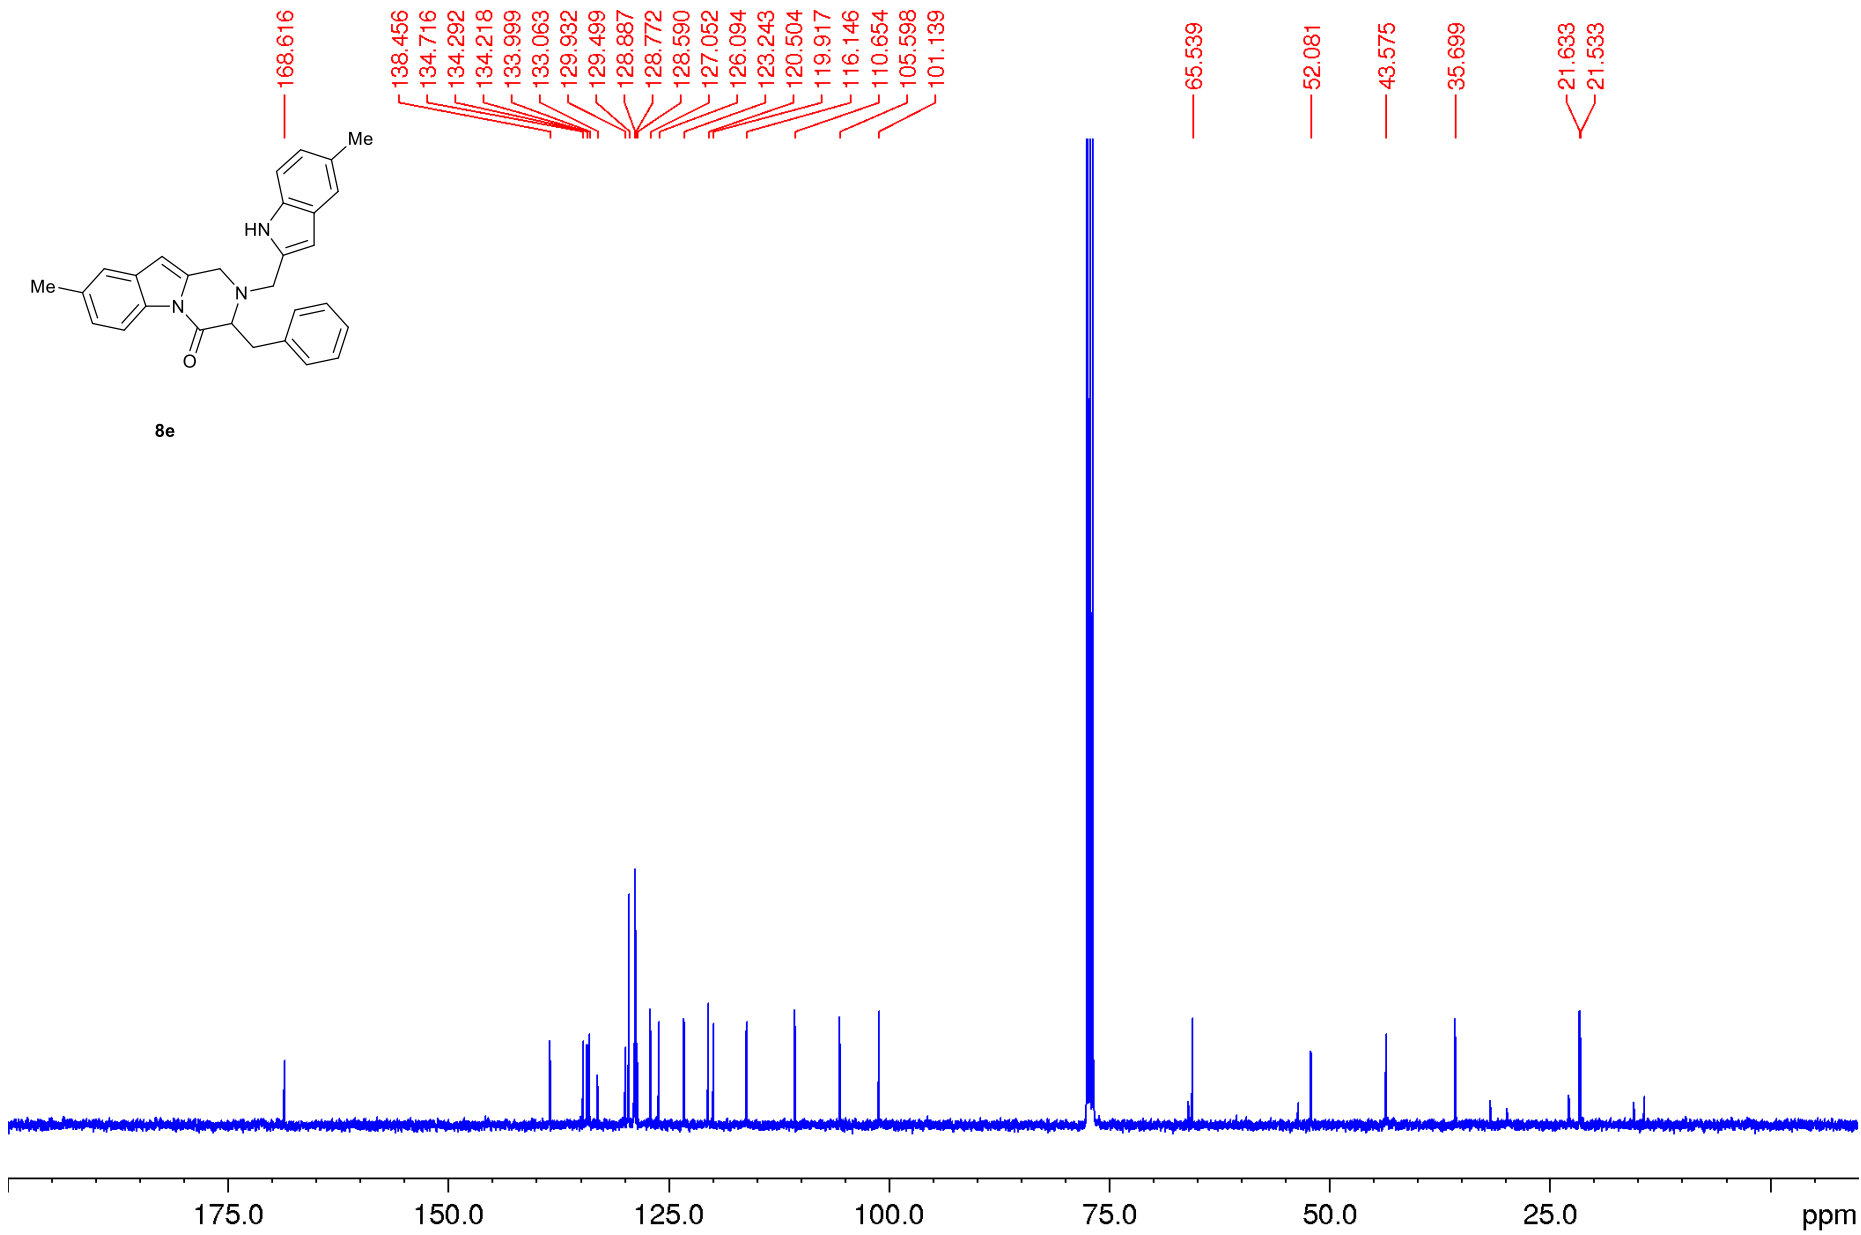

# DEPT 135 NMR-spectrum (CDCl<sub>3</sub>)

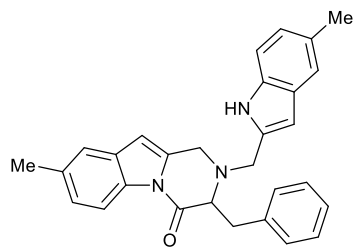

8e

129.461  
128.734  
127.014  
126.056  
123.205  
120.466  
119.879  
116.108  
110.617  
105.560  
101.101

65.500

52.044

43.538

35.661

21.596  
21.496

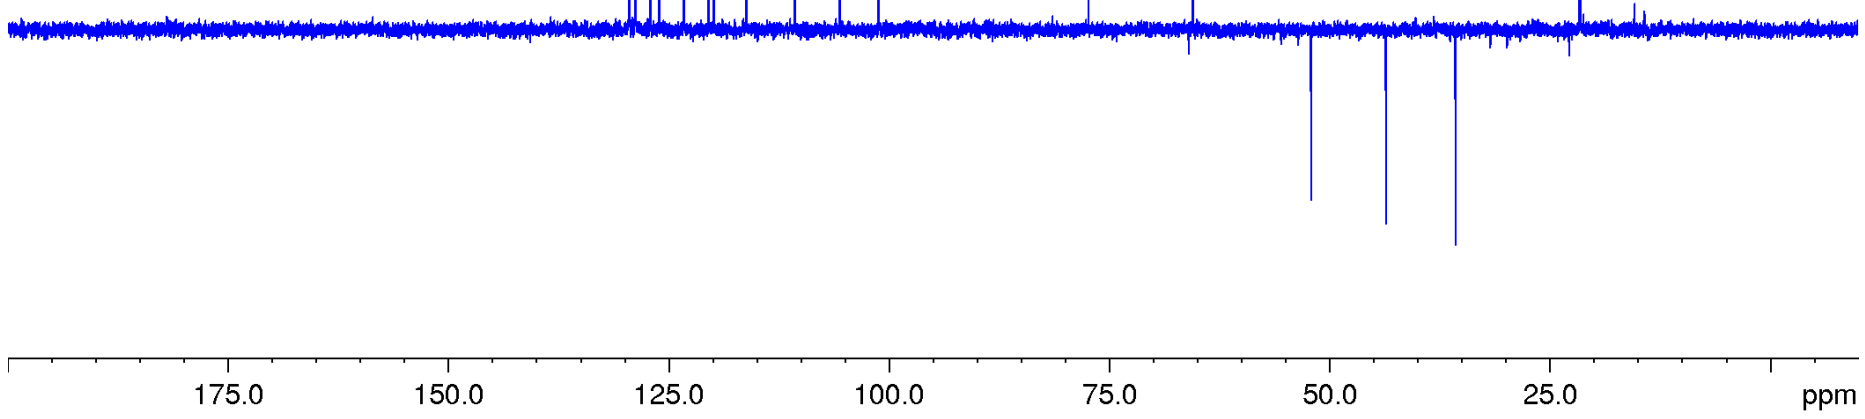

# $^1\text{H}$ NMR-spectrum (400.13 MHz) ( $\text{CDCl}_3$ )

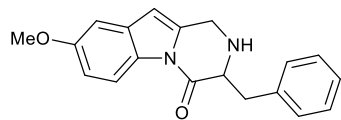

5f

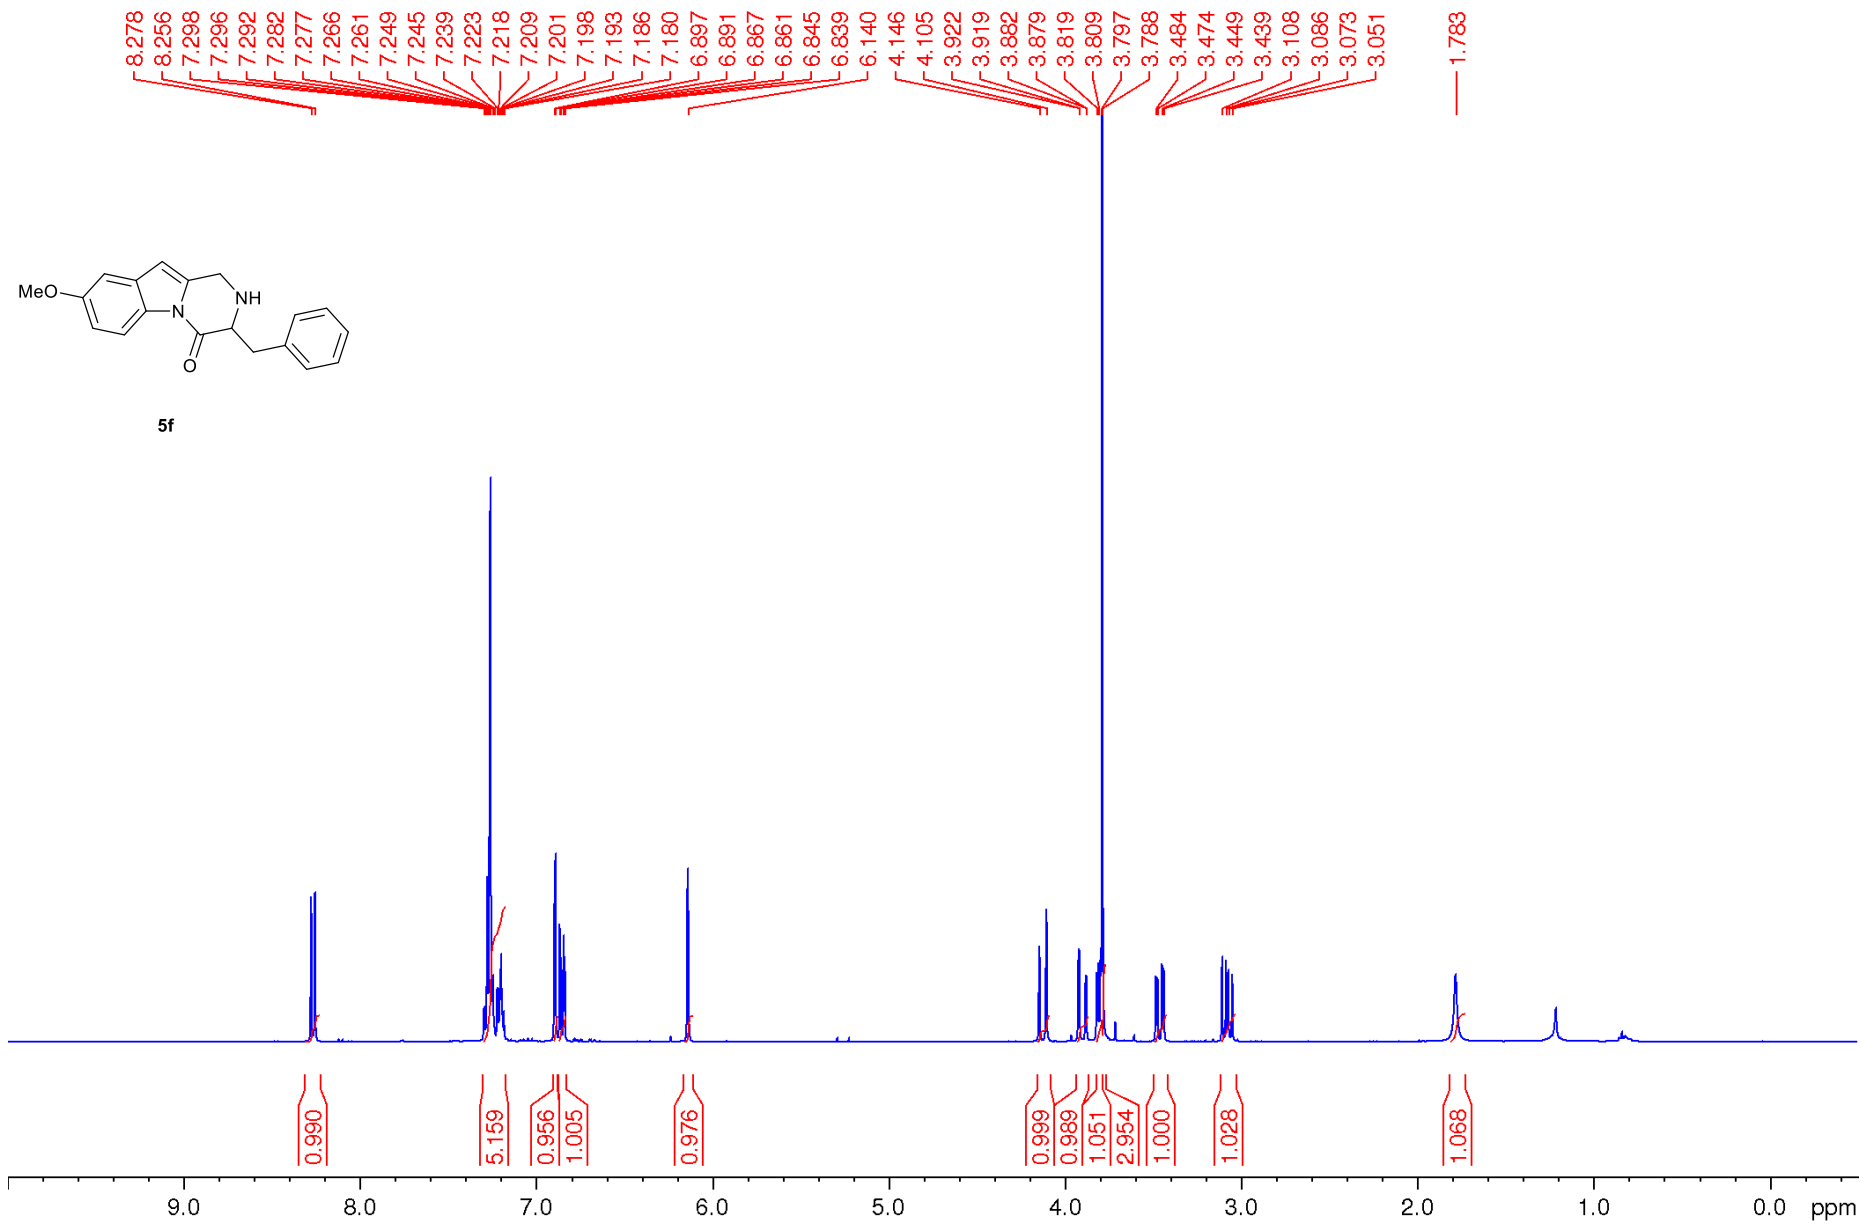



# $^{13}\text{C}$ NMR-spectrum (100.6 MHz) ( $\text{CDCl}_3$ )

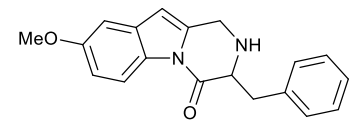

5f

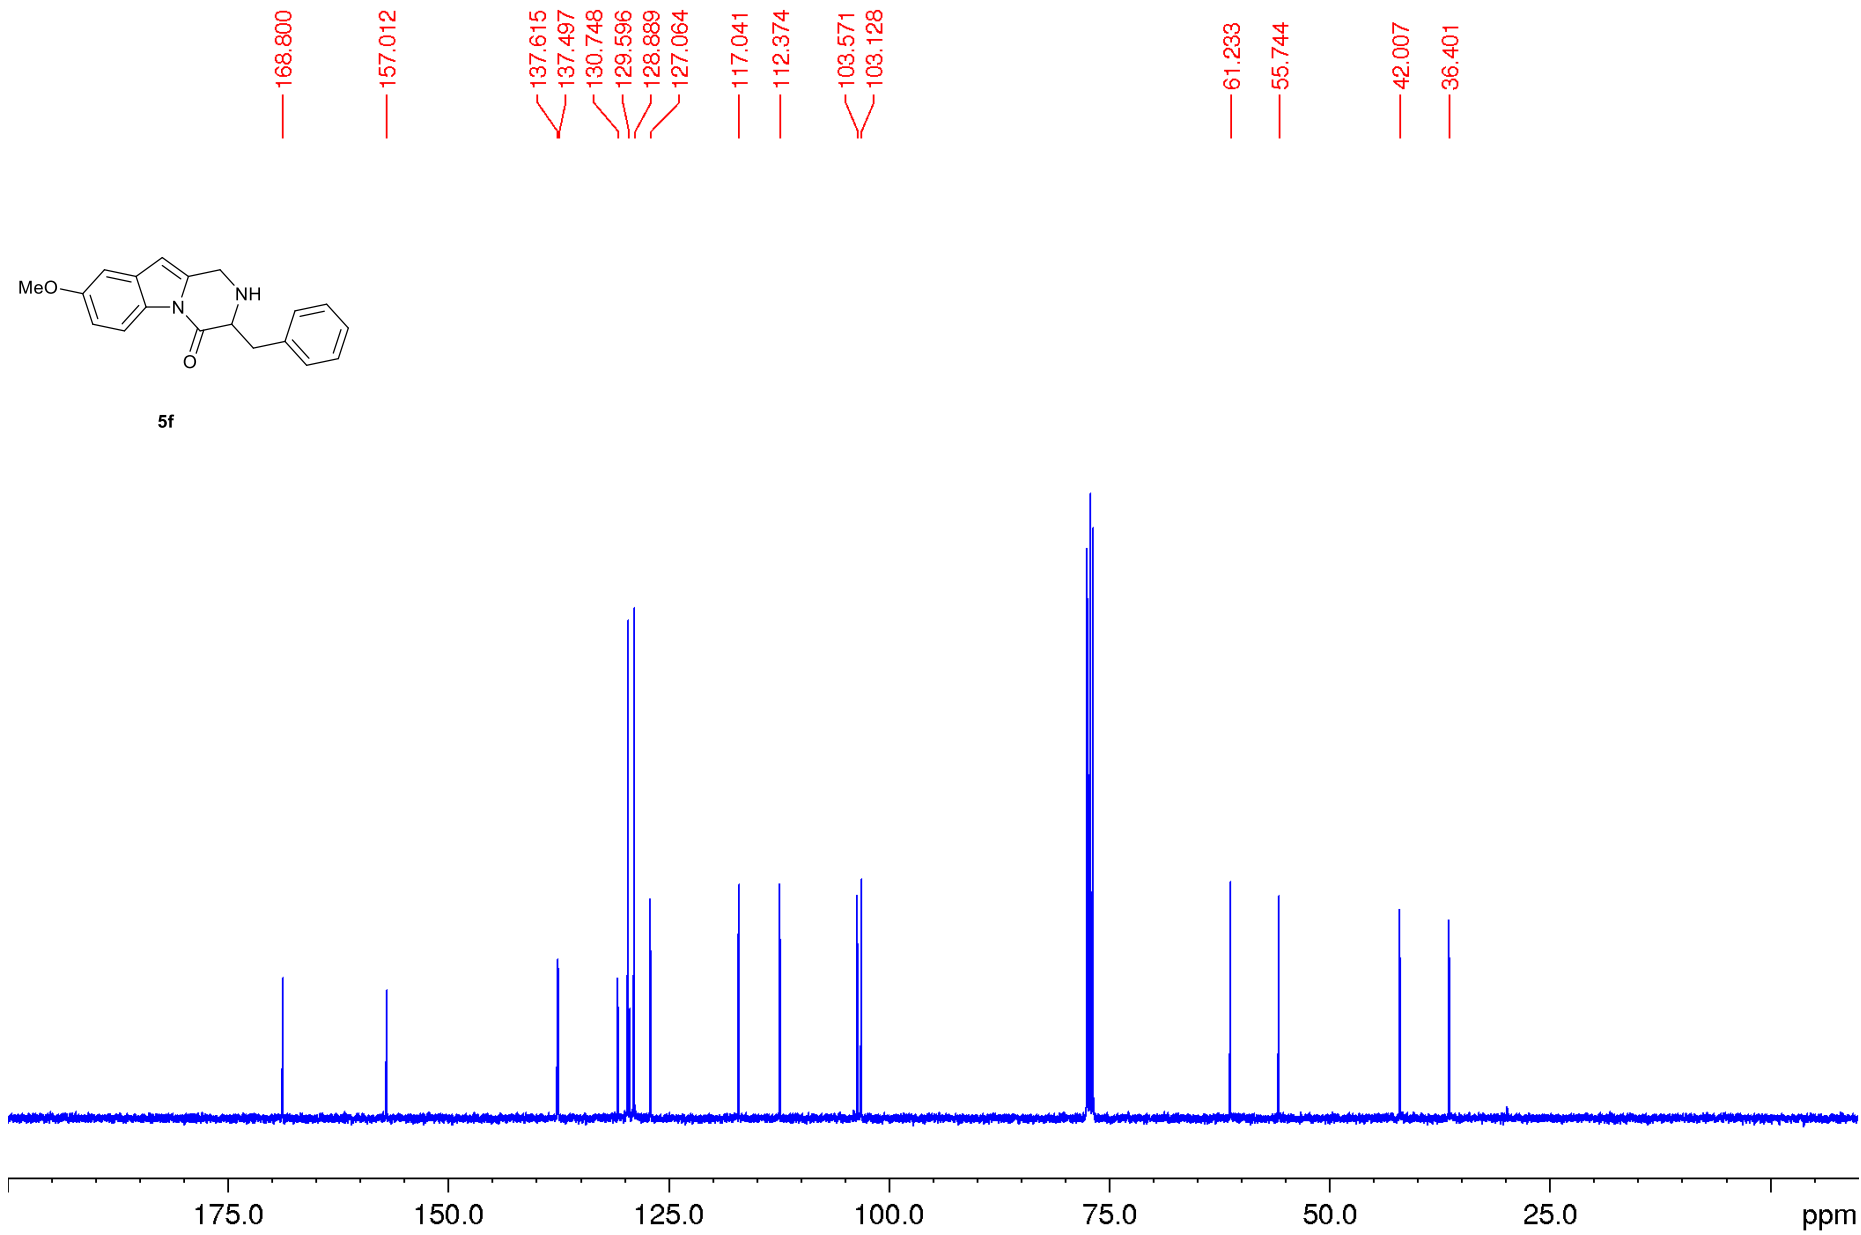

# DEPT 135 NMR-spectrum (CDCl<sub>3</sub>)



5f

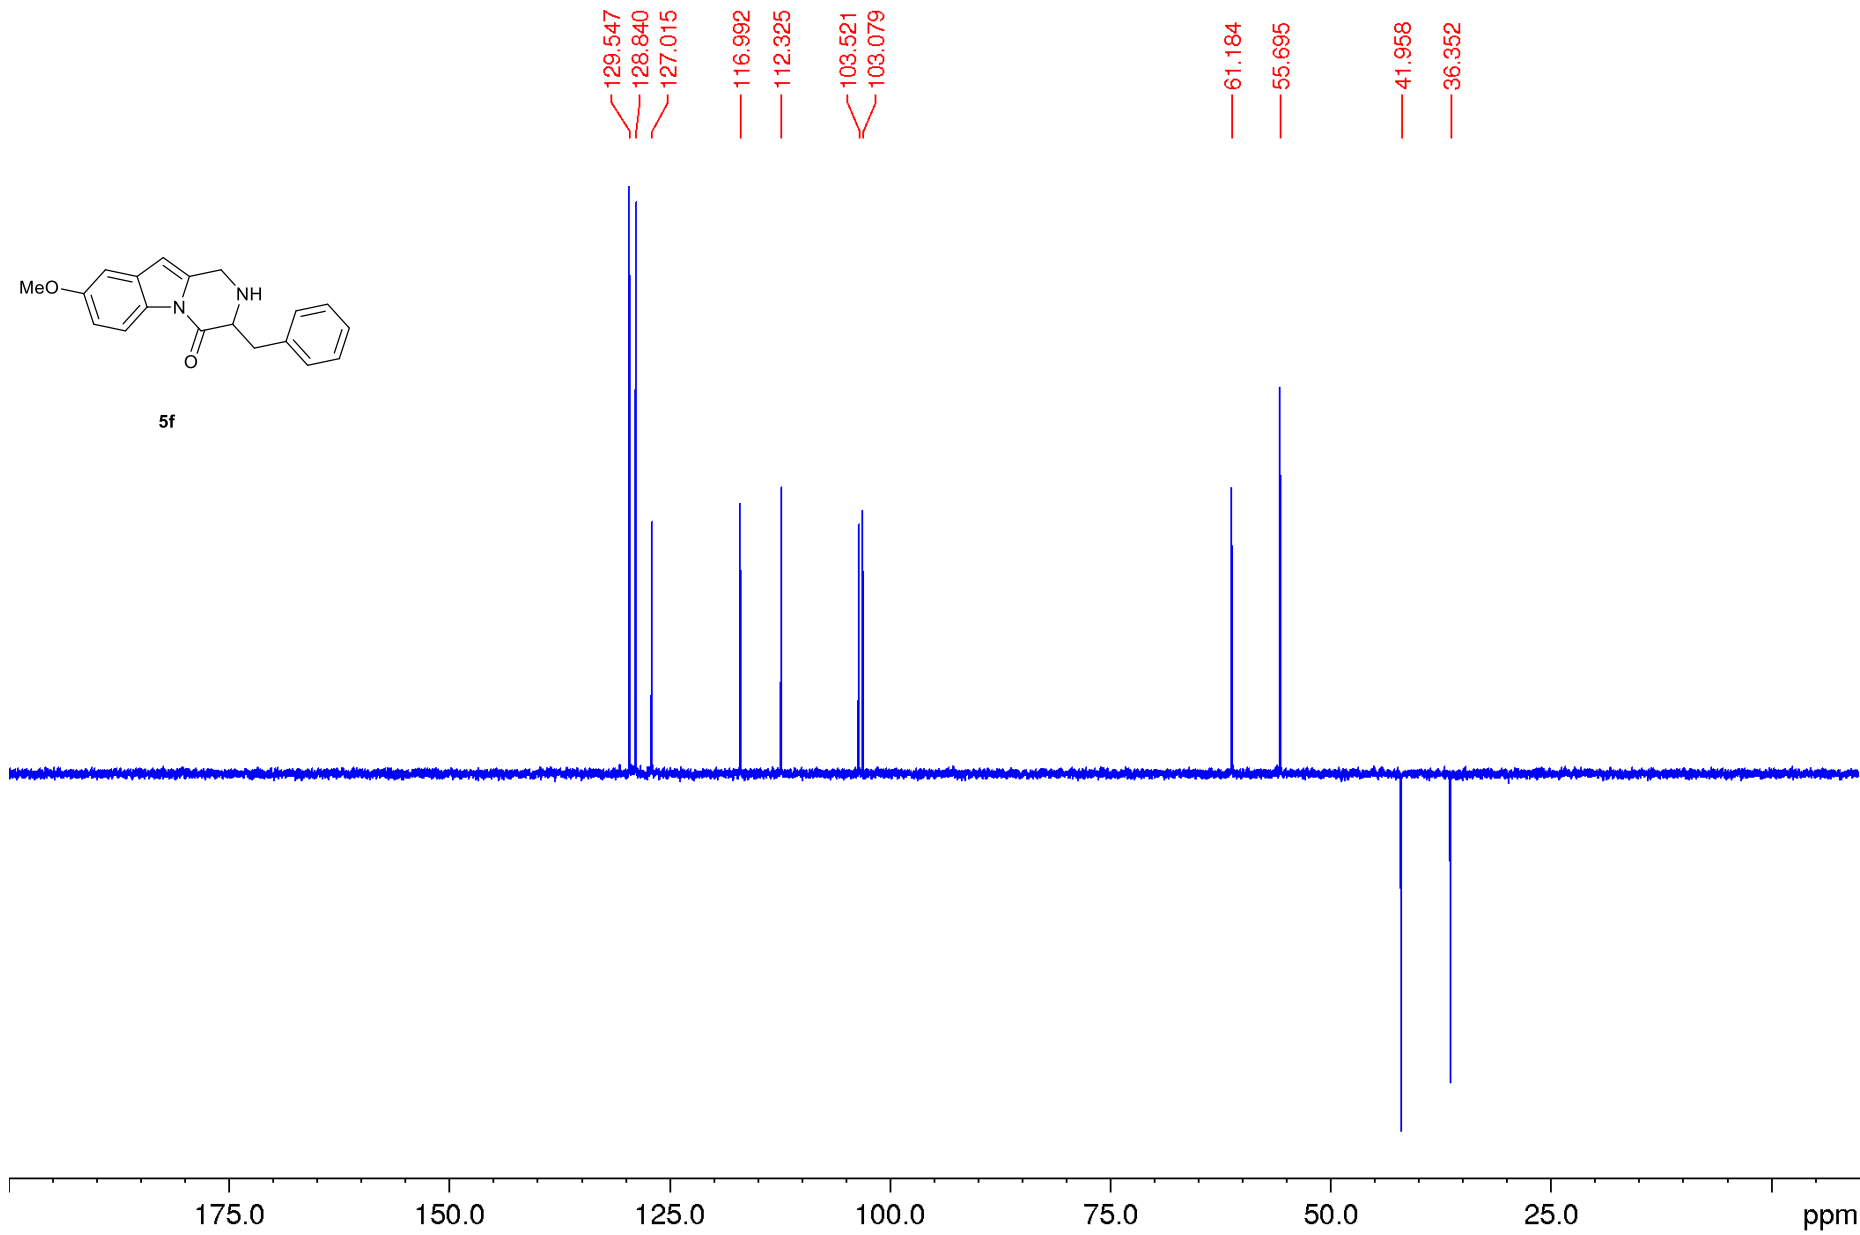

# <sup>1</sup>H NMR-spectrum (400.13 MHz) (CDCl<sub>3</sub>)

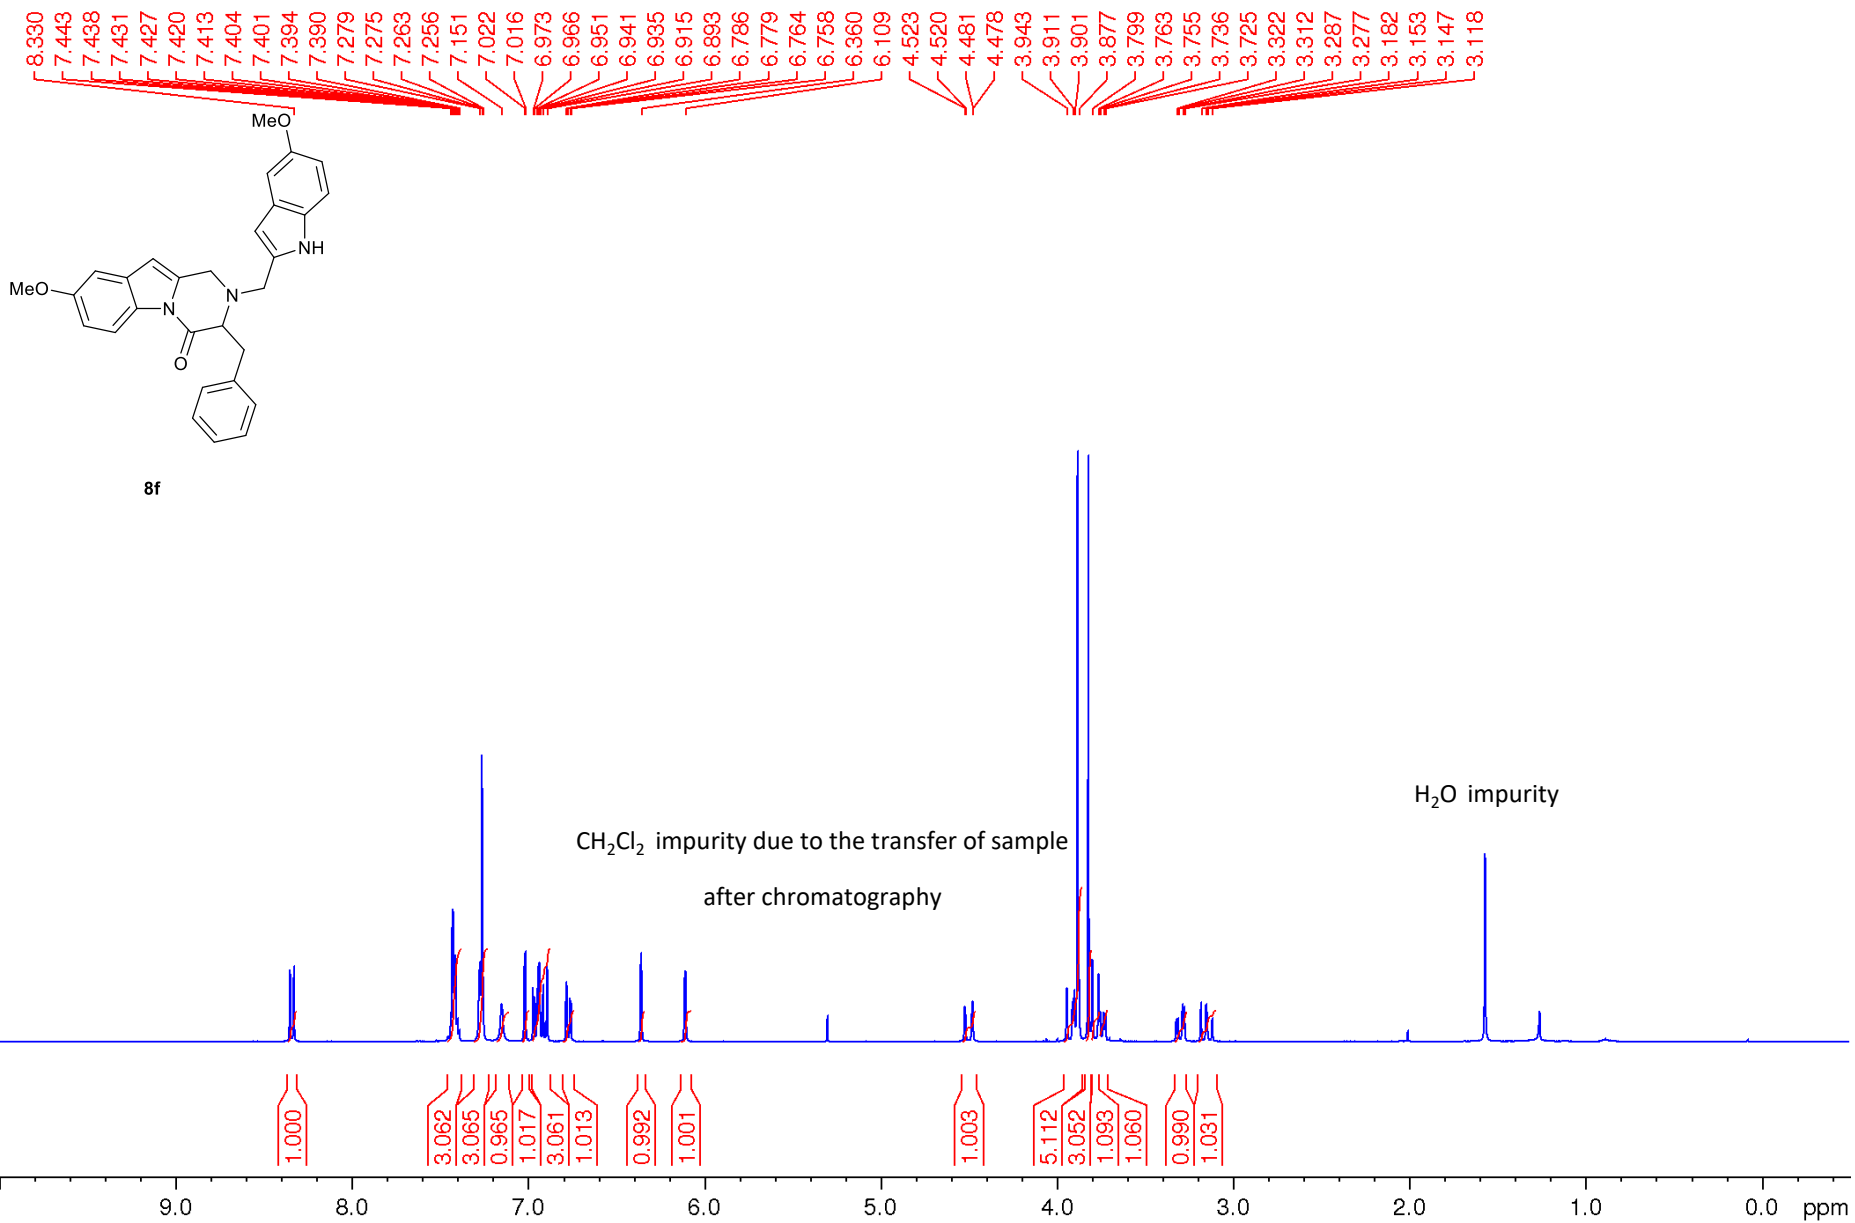

$^{13}\text{C}$  NMR-spectrum (100.6 MHz) ( $\text{CDCl}_3$ )

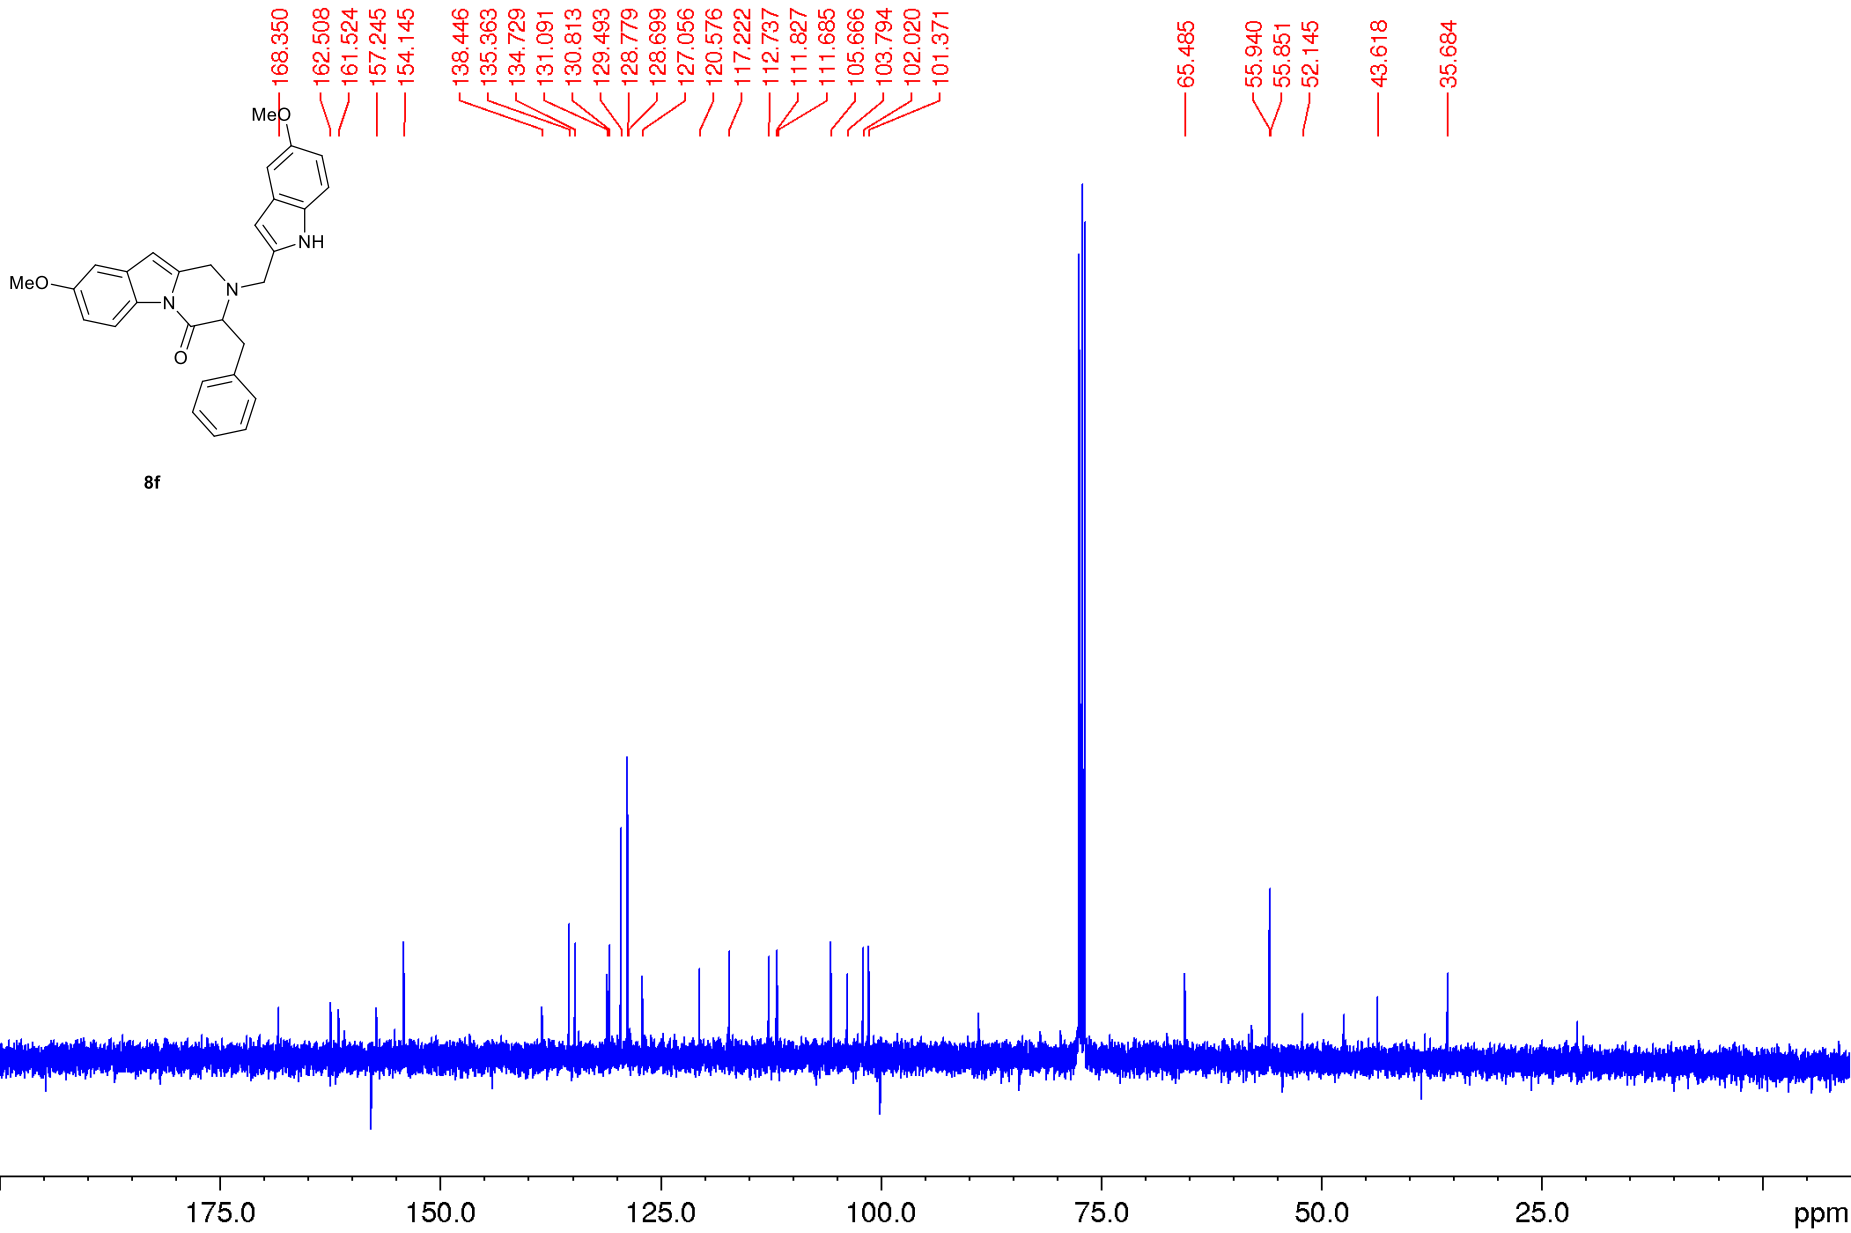

# DEPT 135 NMR-spectrum (CDCl<sub>3</sub>)

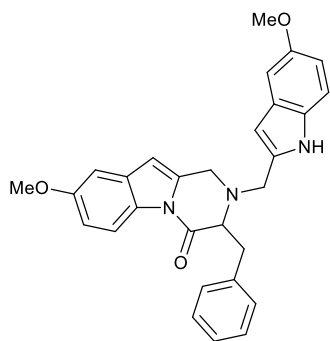

**8f**

129.493  
128.781  
127.058  
117.224  
112.737  
111.828  
111.686  
105.669  
103.797  
102.021  
101.374

65.489  
55.943  
55.854  
52.148  
43.621  
35.688

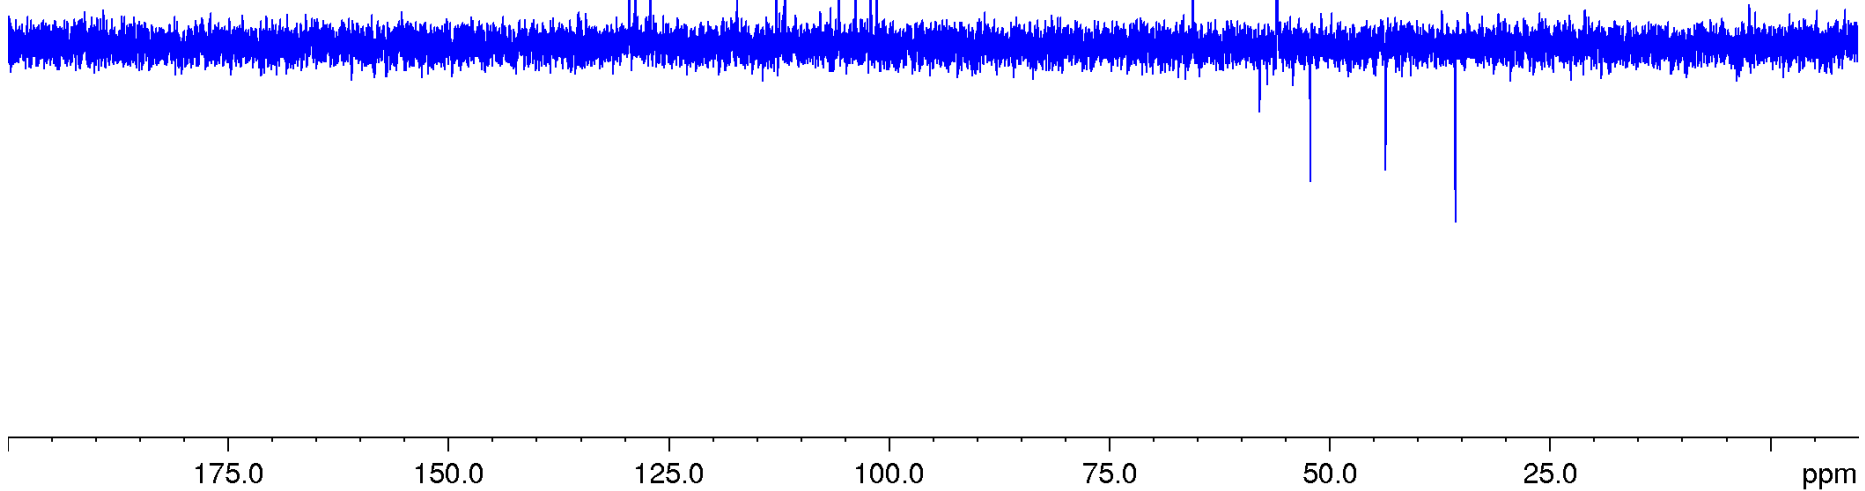

# <sup>1</sup>H NMR-spectrum (400.13 MHz) (CDCl<sub>3</sub>)

8.292  
8.271  
7.372  
7.367  
7.285  
7.266  
7.248  
7.243  
7.226  
7.208  
7.203  
7.193  
7.183  
6.159

4.178  
4.138  
3.953  
3.913  
3.845  
3.836  
3.823  
3.814  
3.478  
3.468  
3.443  
3.433  
3.103  
3.081  
3.068  
3.046  
1.752

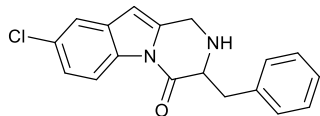

5g

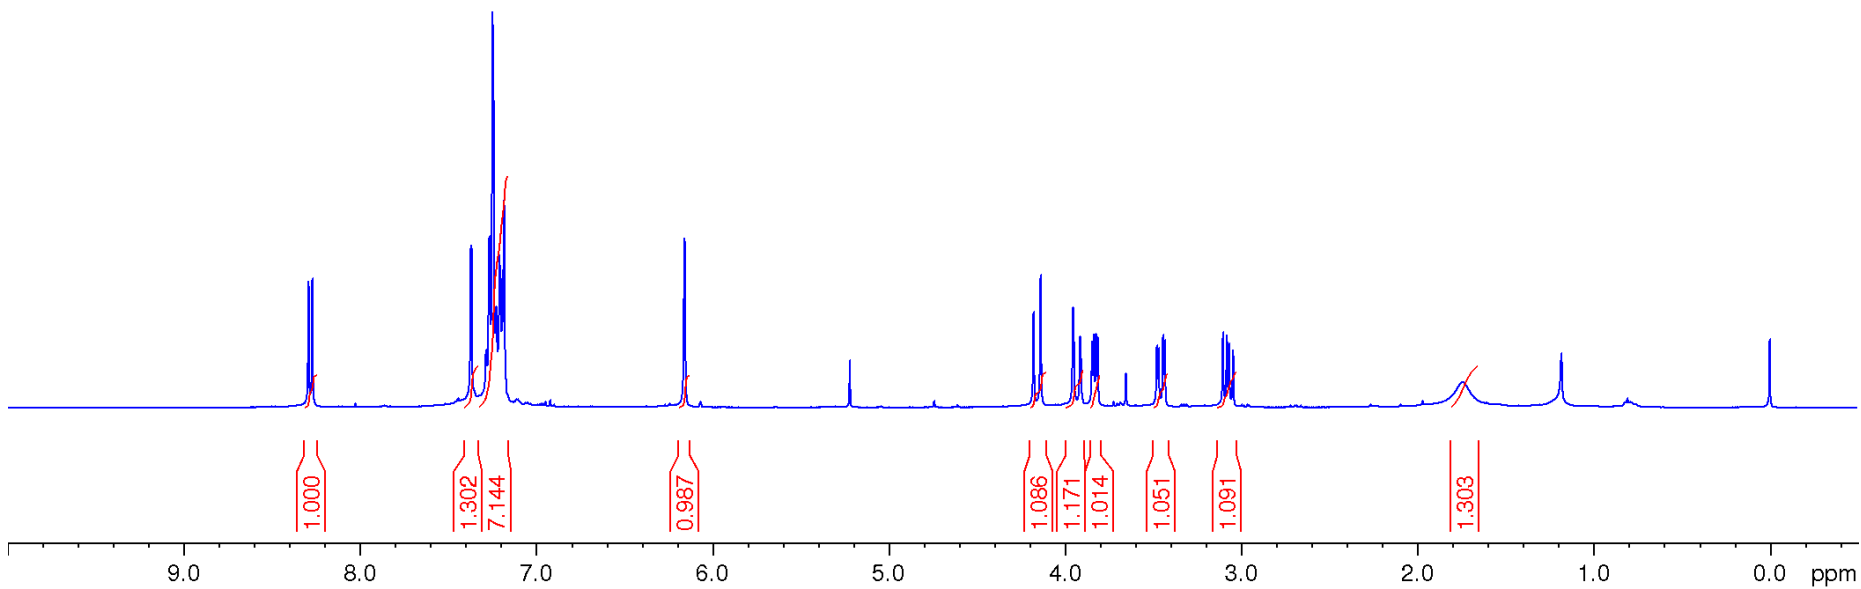

$^{13}\text{C}$  NMR-spectrum (100.6 MHz) ( $\text{CDCl}_3$ )

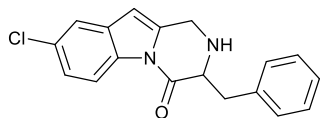

5g

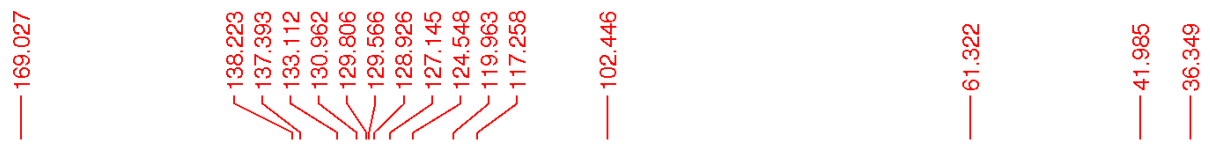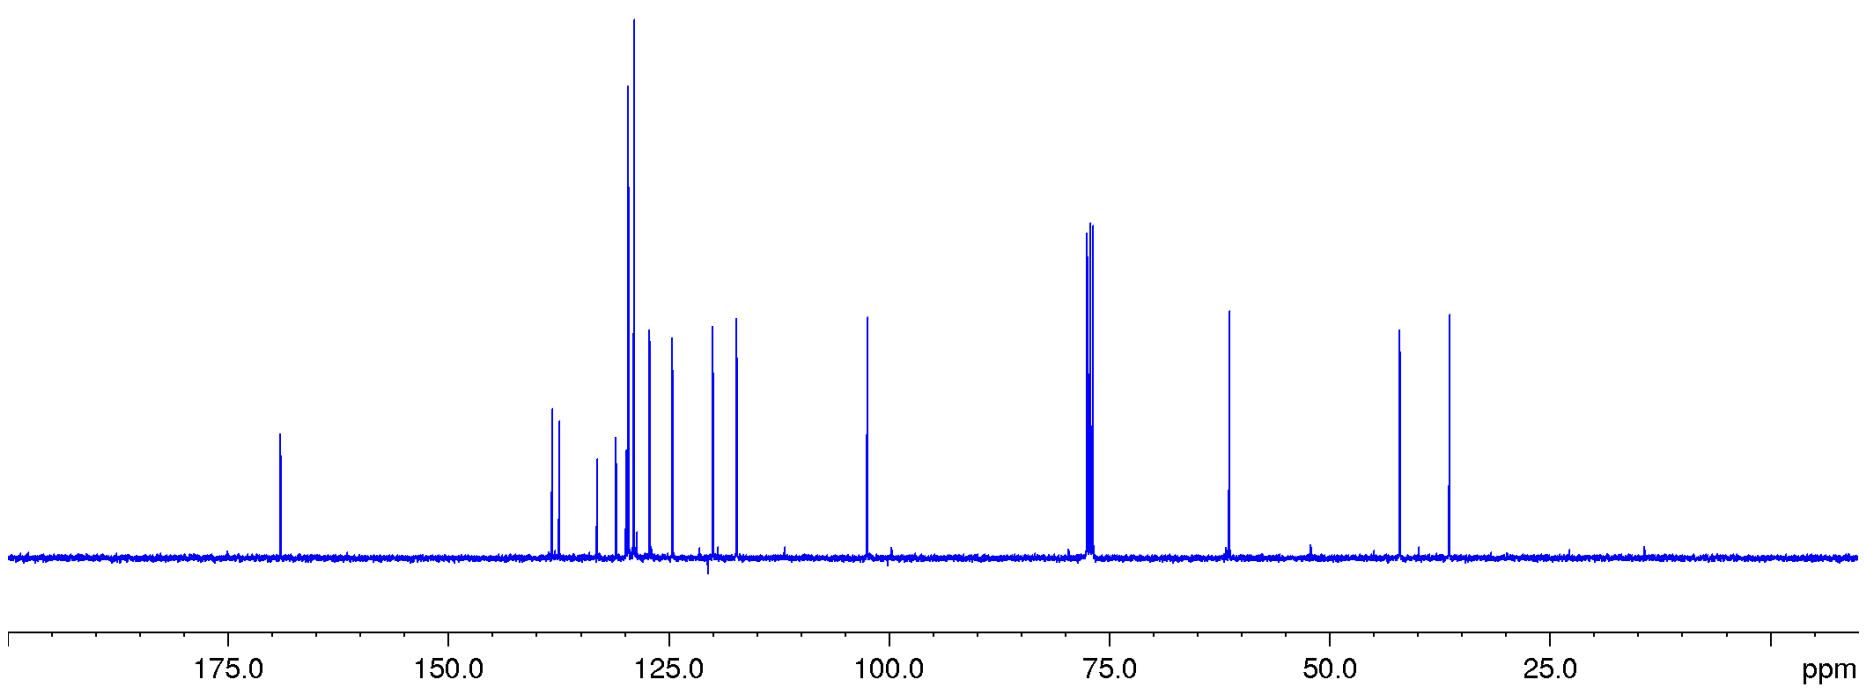

# DEPT 135 NMR-spectrum (CDCl<sub>3</sub>)



5g

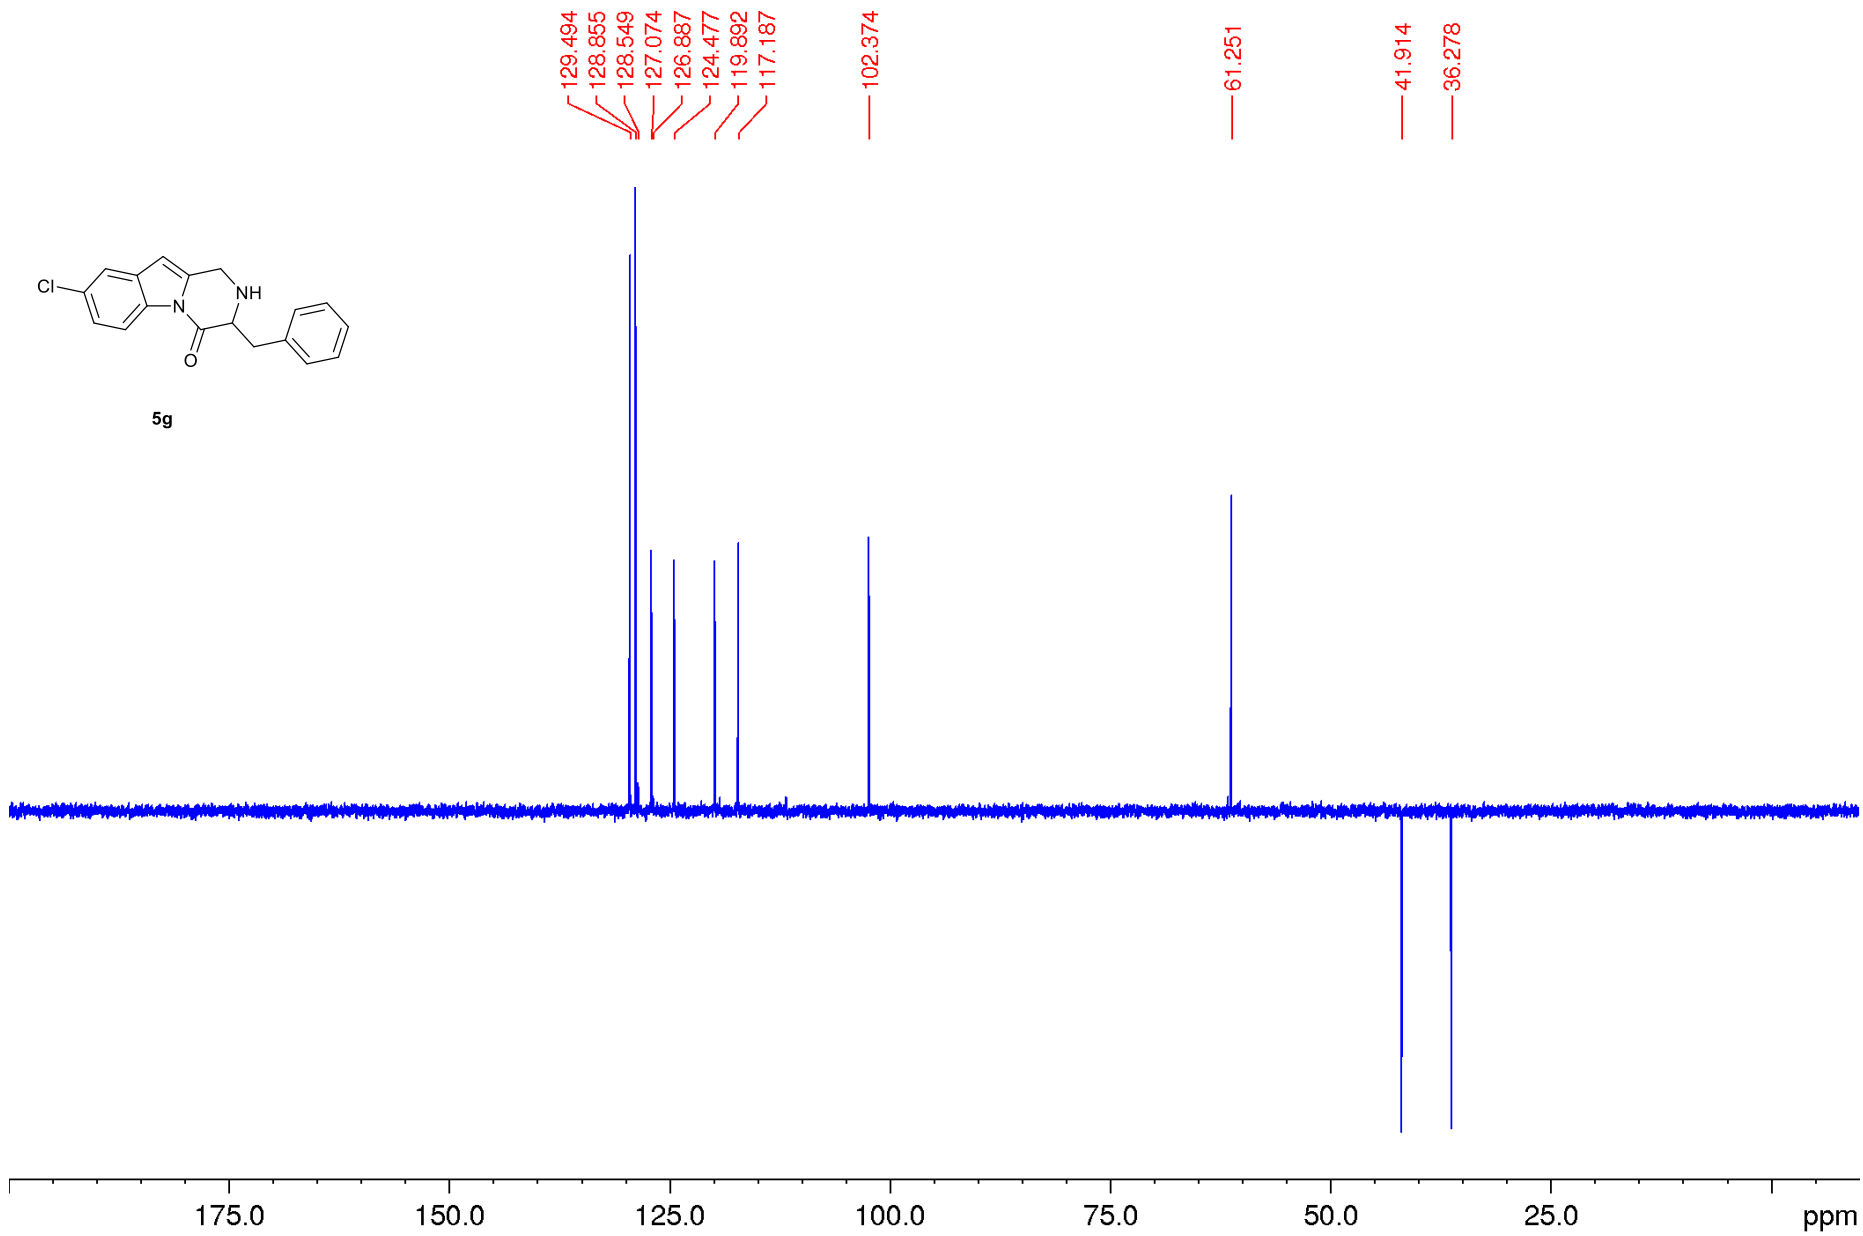



<sup>1</sup>H NMR-spectrum (400.13 MHz) (CDCl<sub>3</sub>)

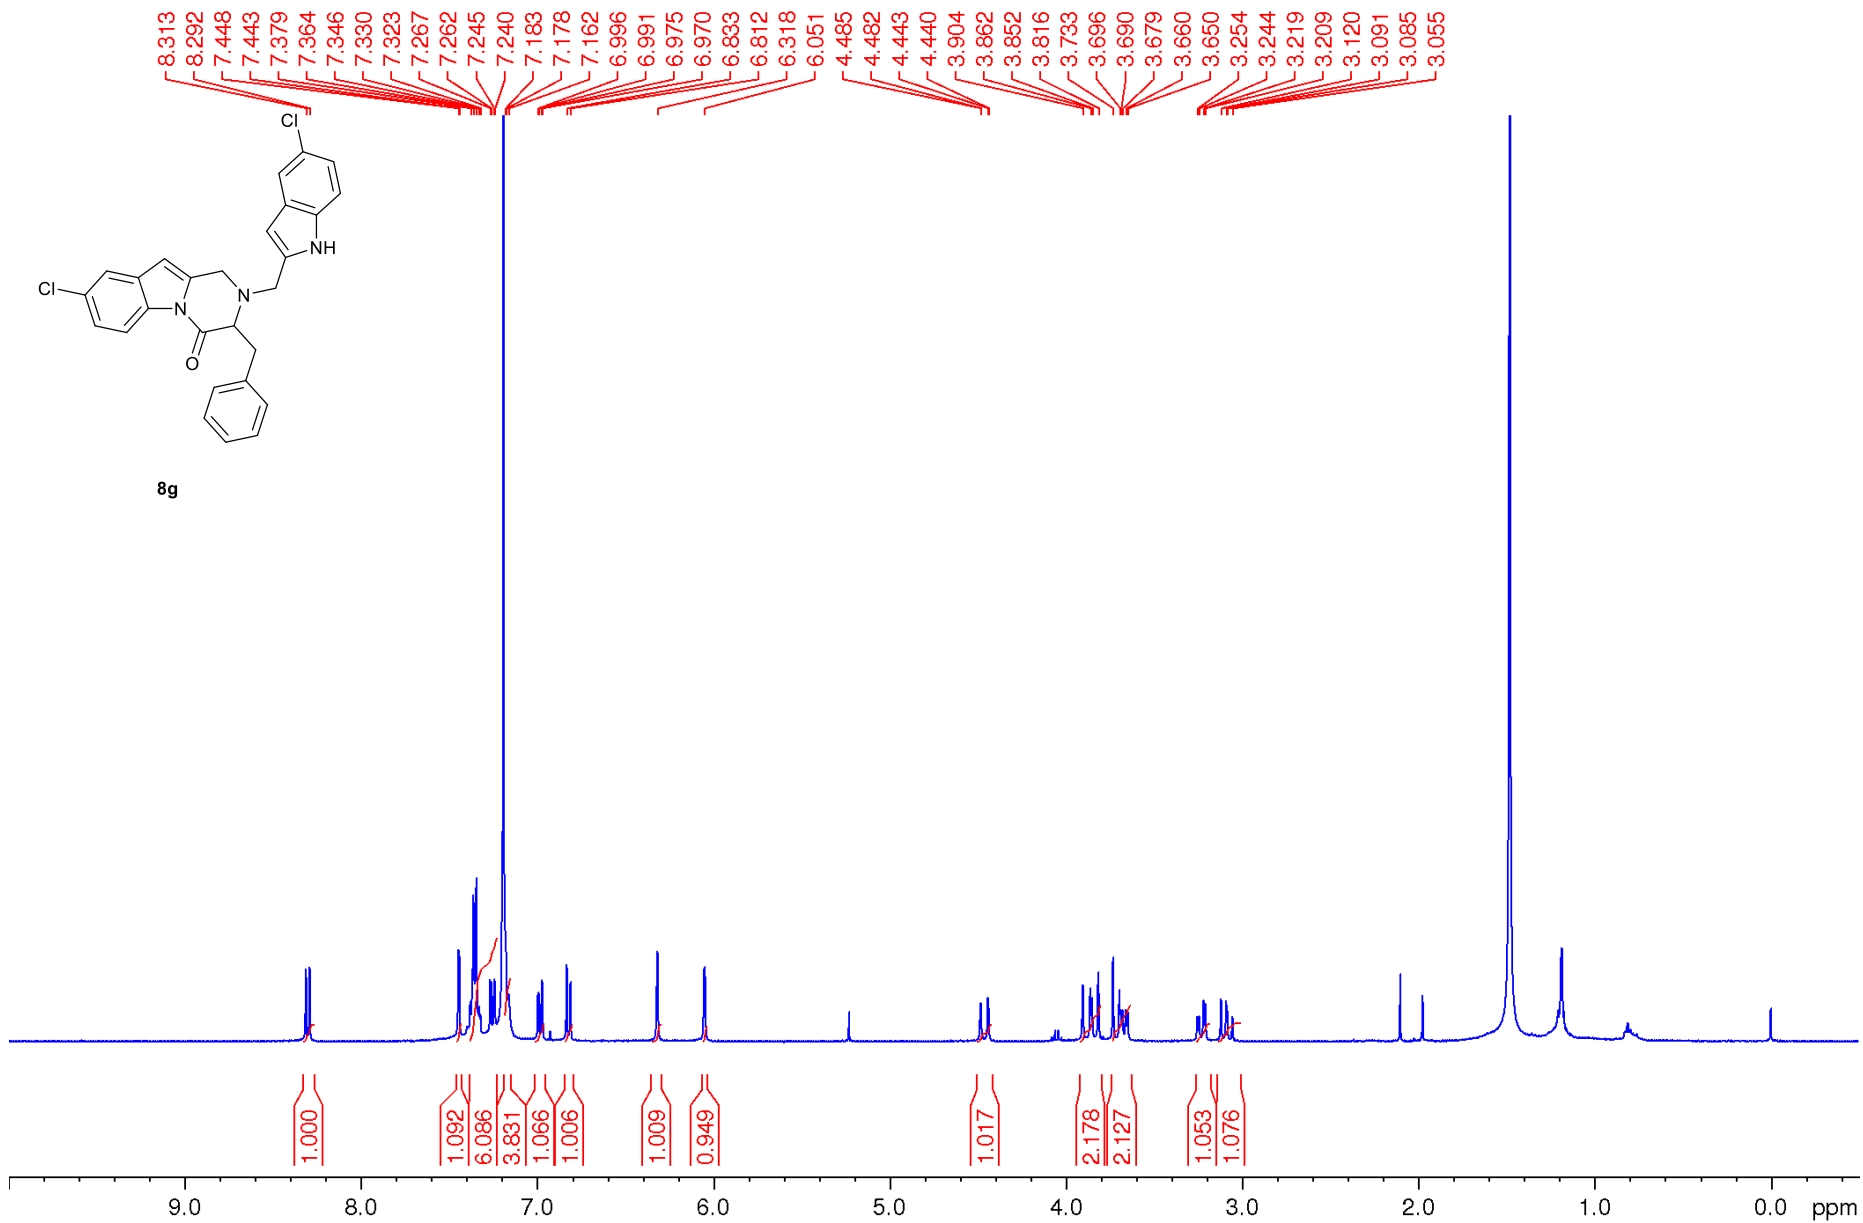

# <sup>1</sup>H NMR-spectrum (400.13 MHz) (CDCl<sub>3</sub>)

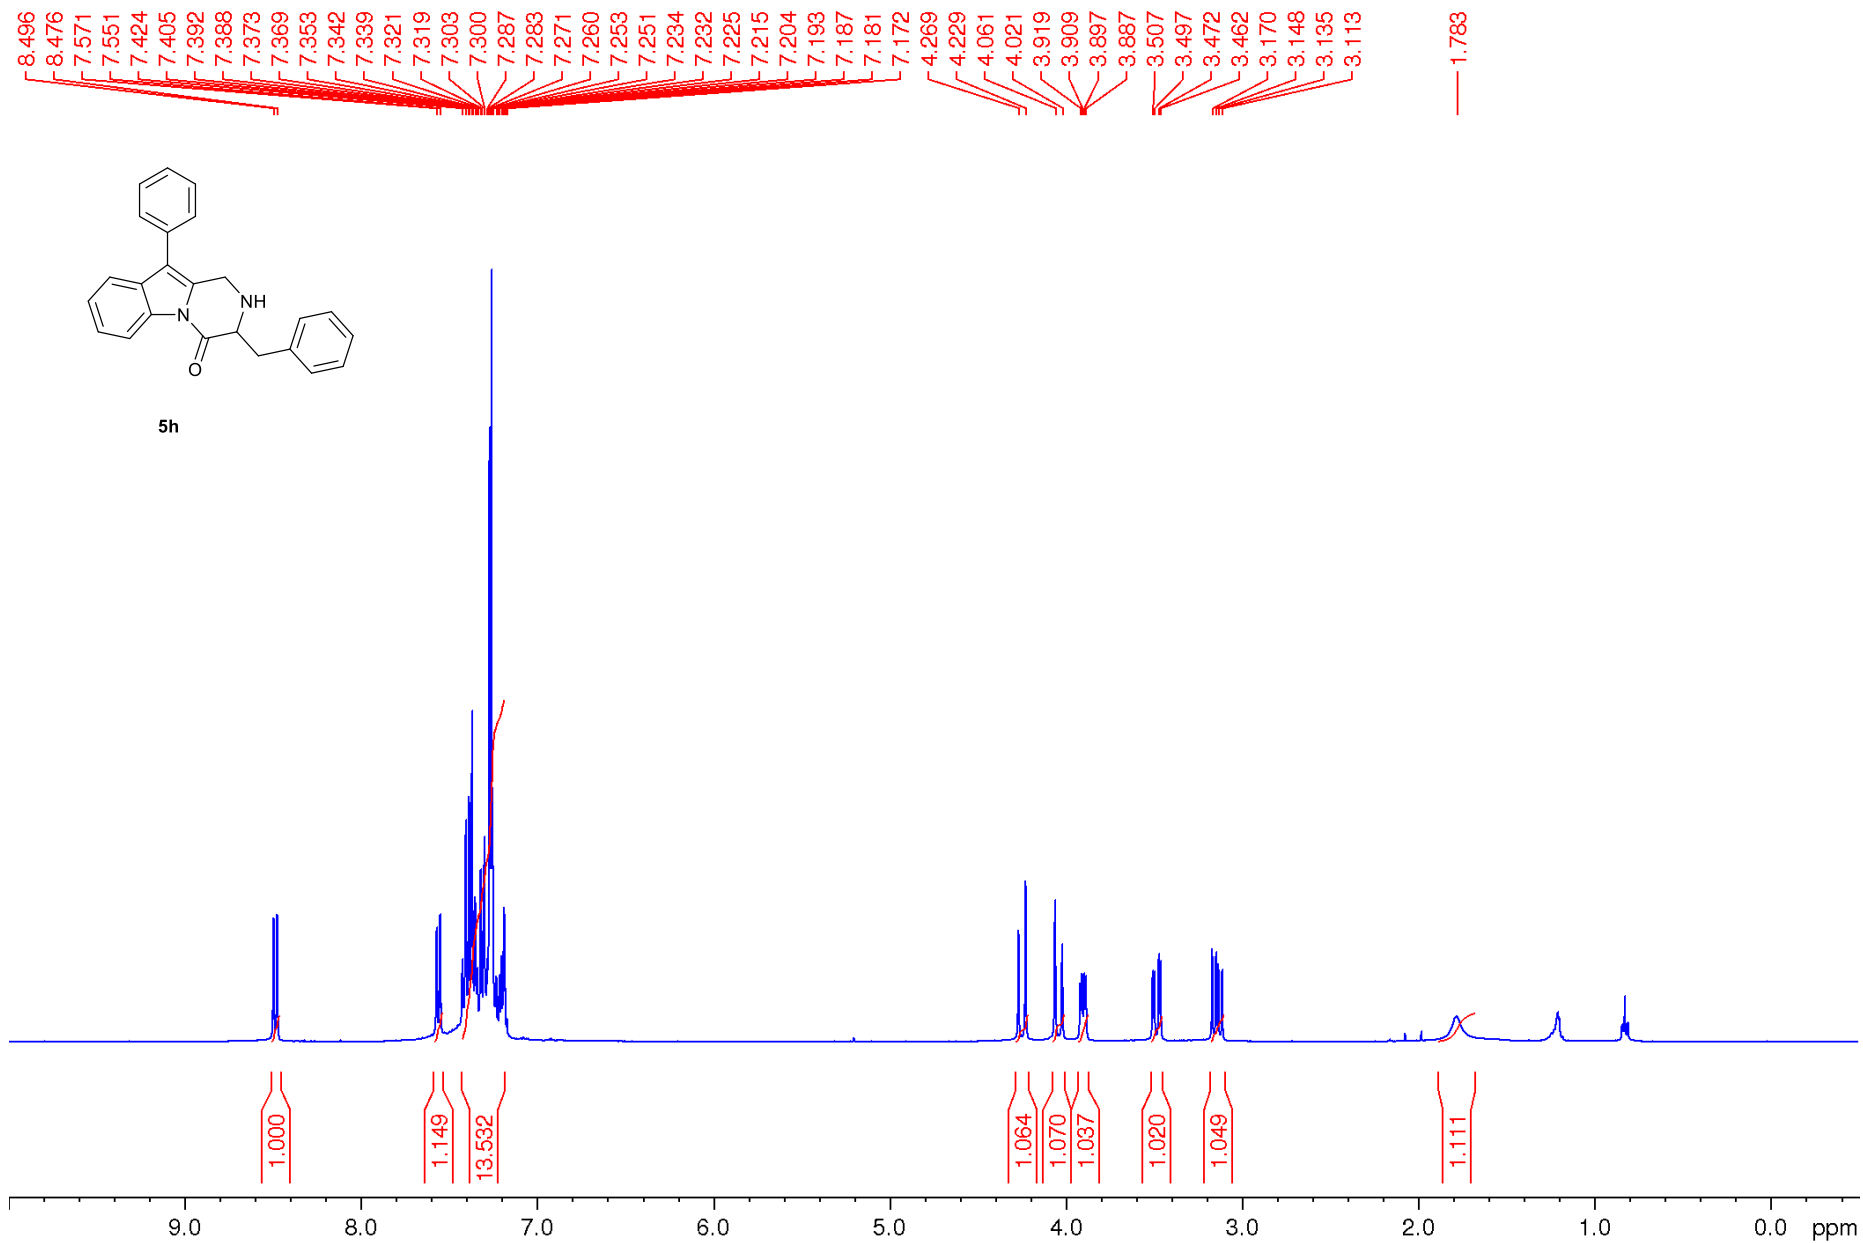

$^{13}\text{C}$  NMR-spectrum (100.6 MHz) ( $\text{CDCl}_3$ )

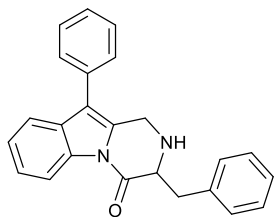

5h

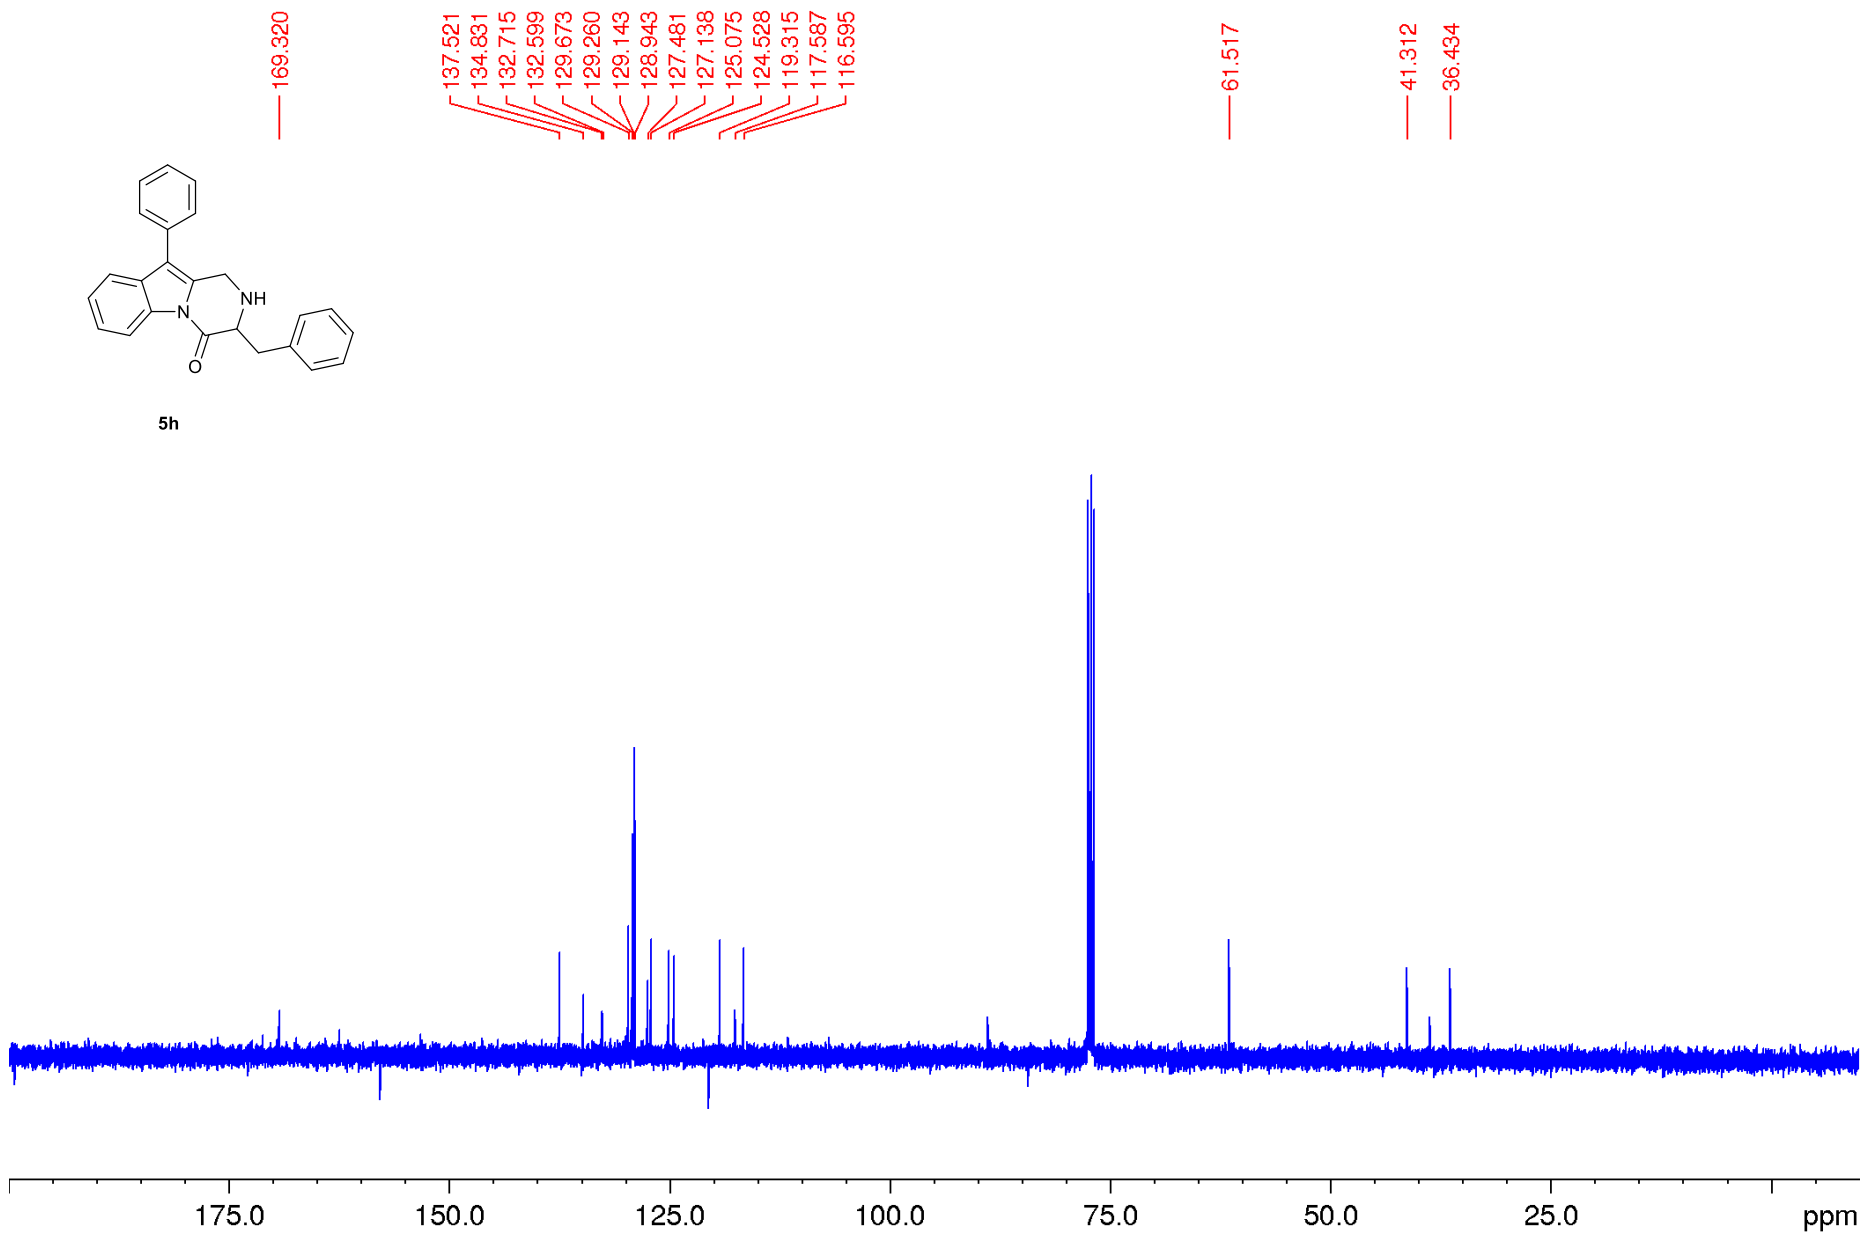

# DEPT 135 NMR-spectrum (CDCl<sub>3</sub>)

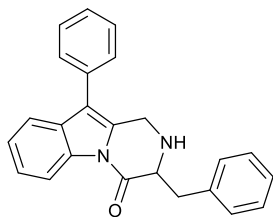

5h

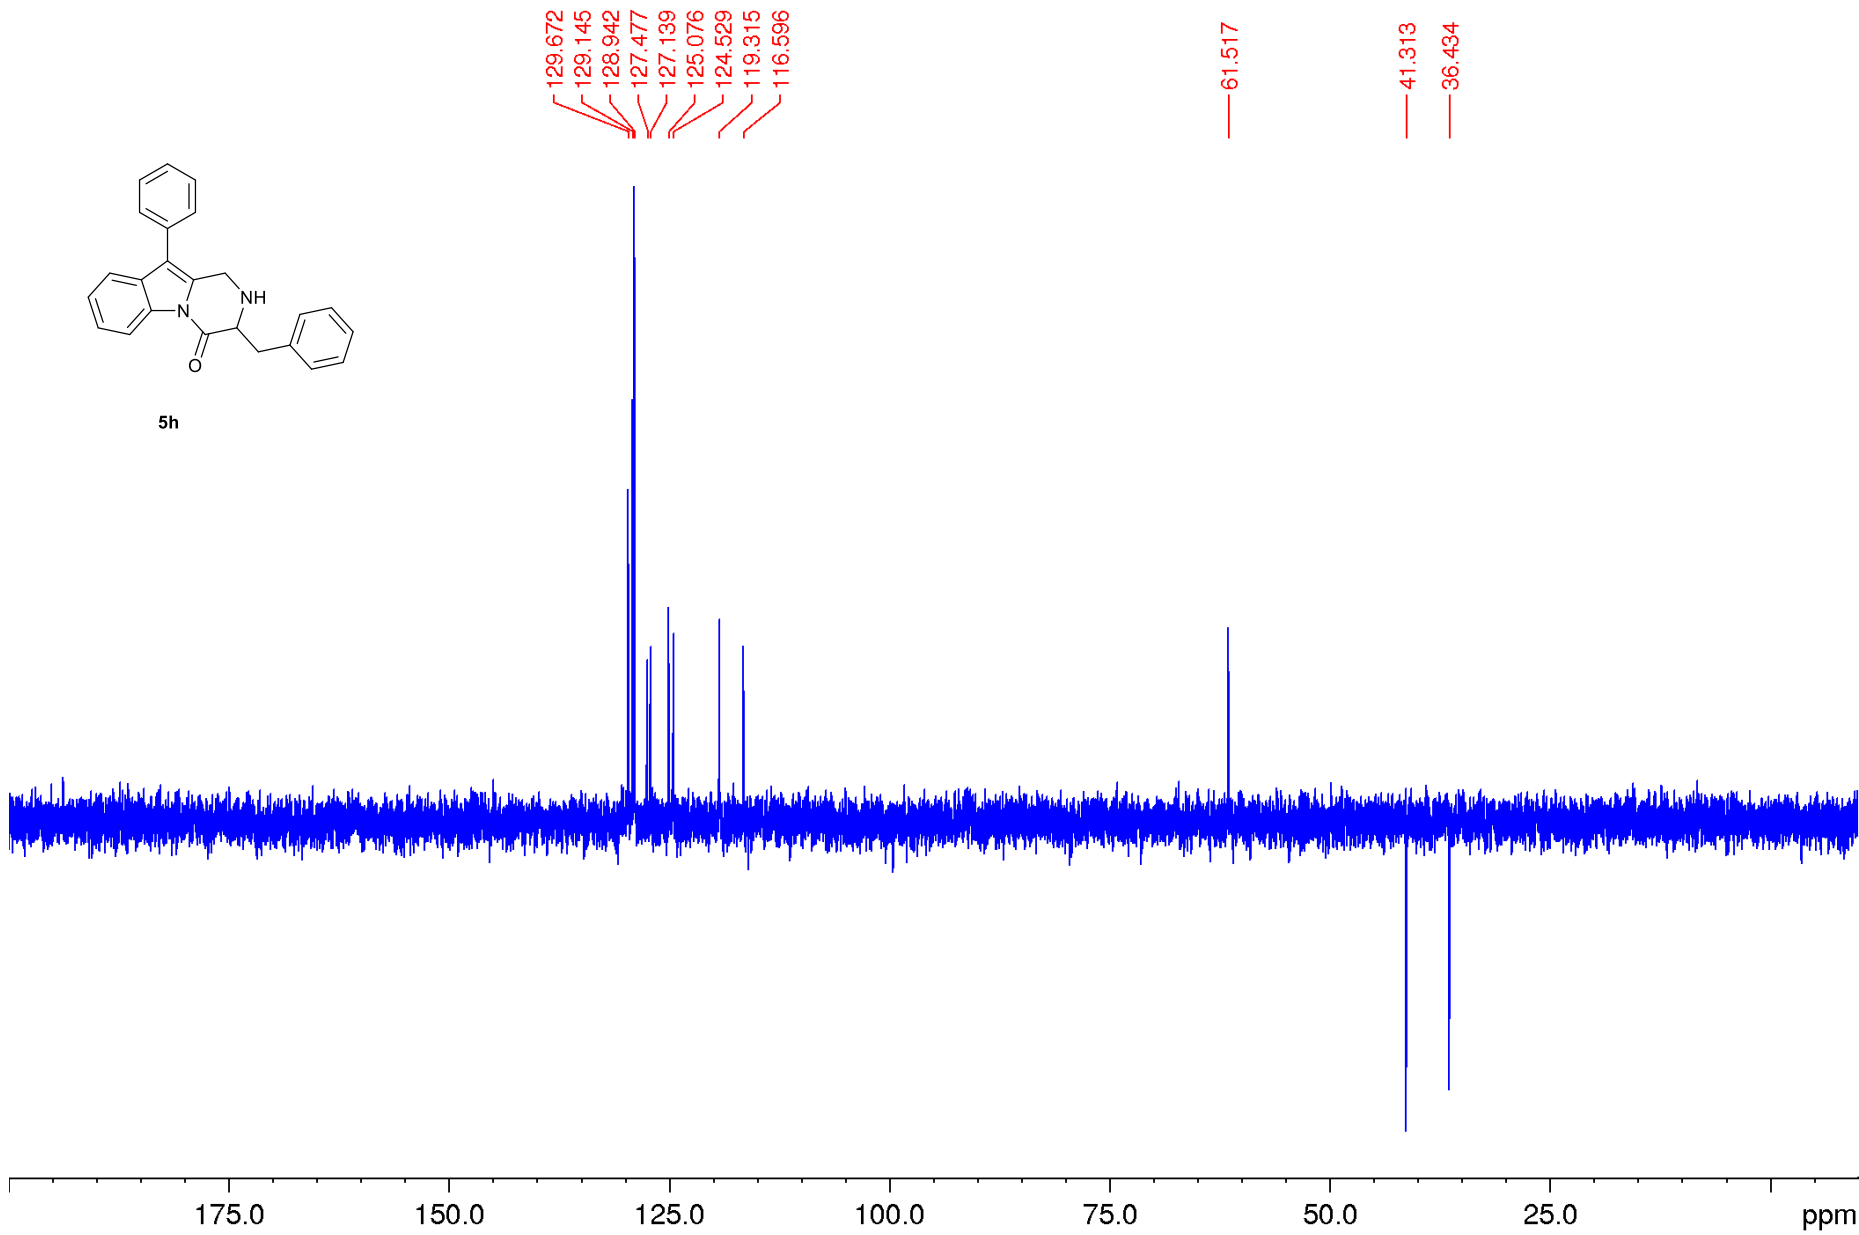

# <sup>1</sup>H NMR-spectrum (400.13 MHz) (CDCl<sub>3</sub>)

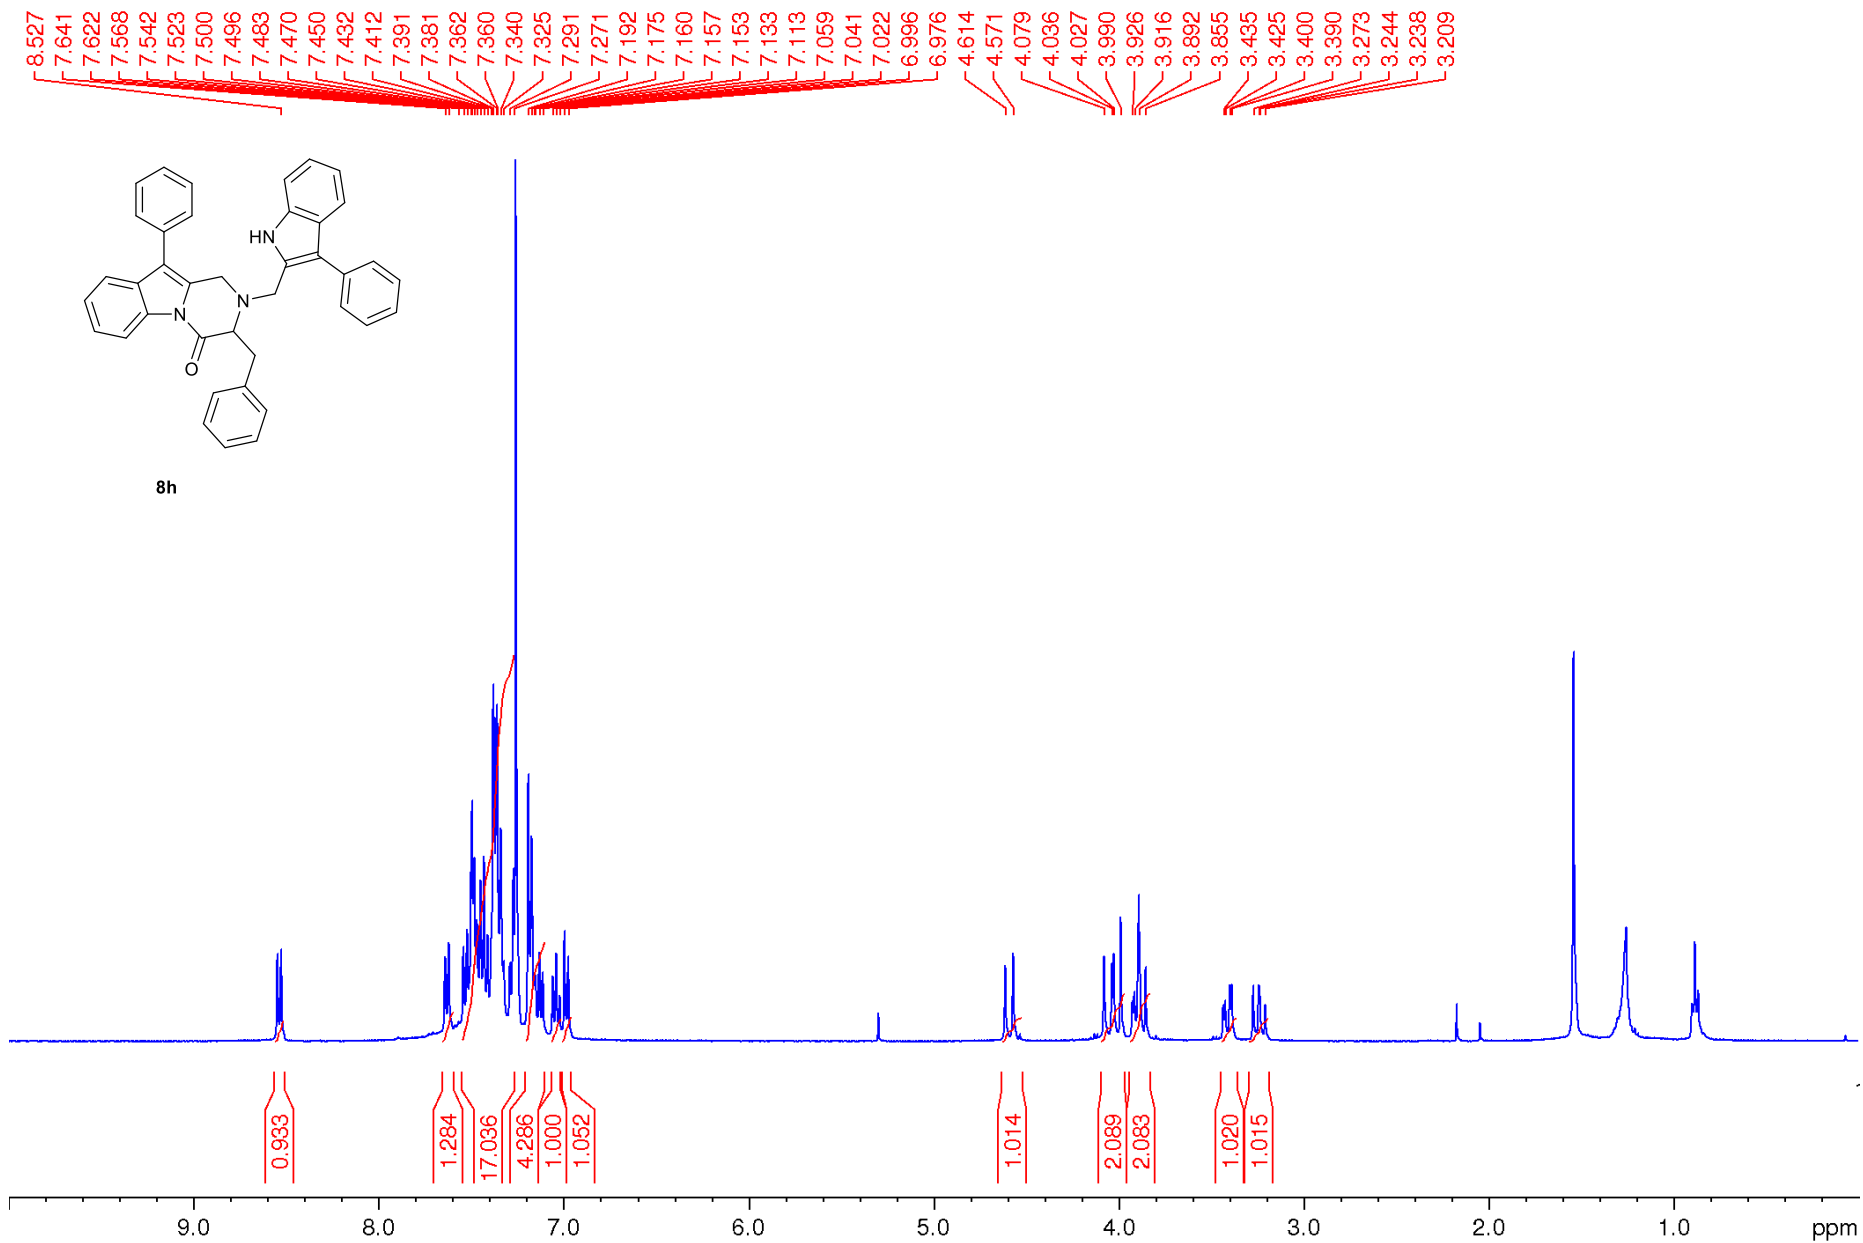

<sup>13</sup>C NMR-spectrum (100.6 MHz) (CDCl<sub>3</sub>)

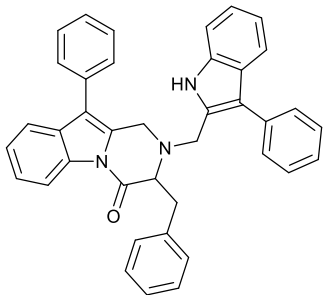

8h

- 168.837
- 161.524
- 138.476
- 135.093
- 134.910
- 134.342
- 132.260
- 130.988
- 129.632
- 129.559
- 129.435
- 129.405
- 129.136
- 129.085
- 129.005
- 128.655
- 127.824
- 127.750
- 127.284
- 126.197
- 125.438
- 124.739
- 122.107
- 120.489
- 119.913
- 119.489
- 119.205
- 116.726
- 116.063
- 111.004

66.619

50.643

42.413

35.934

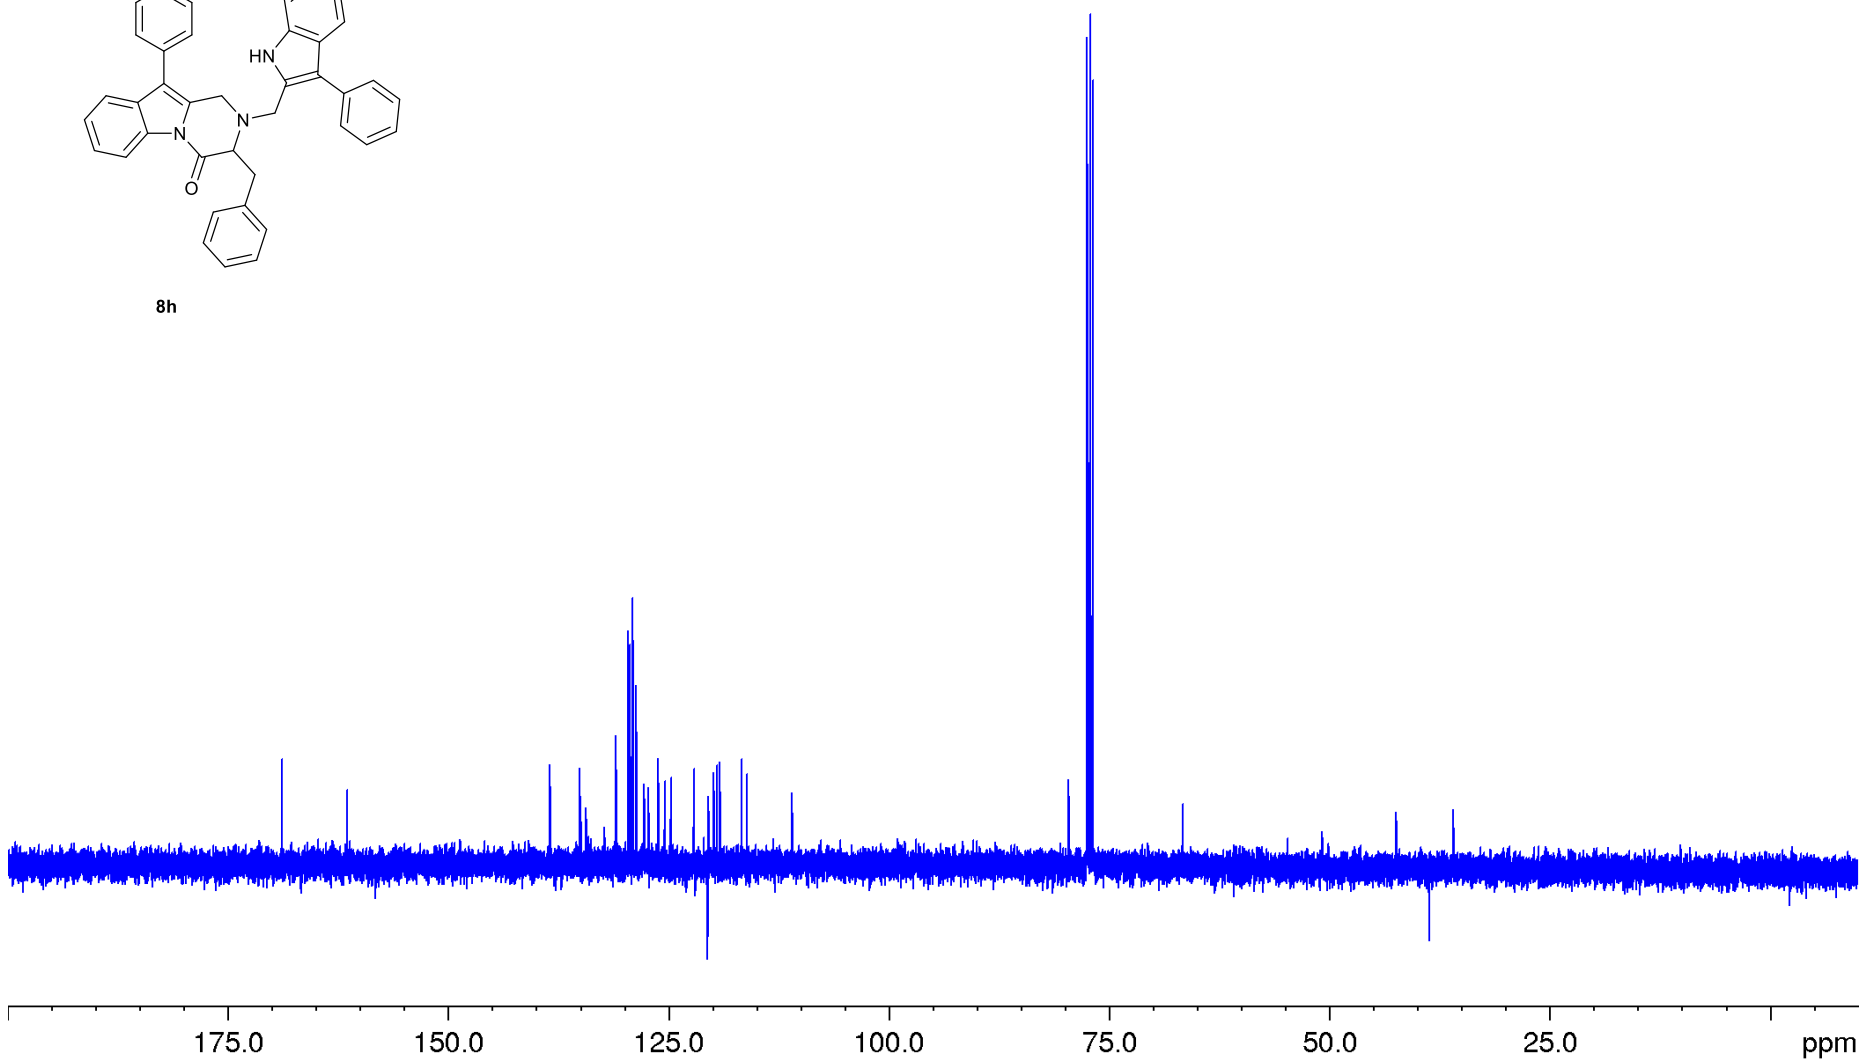

# DEPT 135 NMR-spectrum (CDCl<sub>3</sub>)

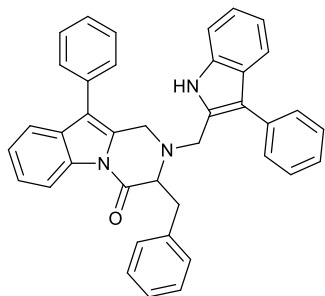

8h

129.516  
129.393  
129.093  
129.043  
128.963  
128.613  
127.708  
127.241  
126.155  
125.392  
124.696  
122.064  
119.871  
119.447  
119.163  
110.963

66.573

42.369

35.892

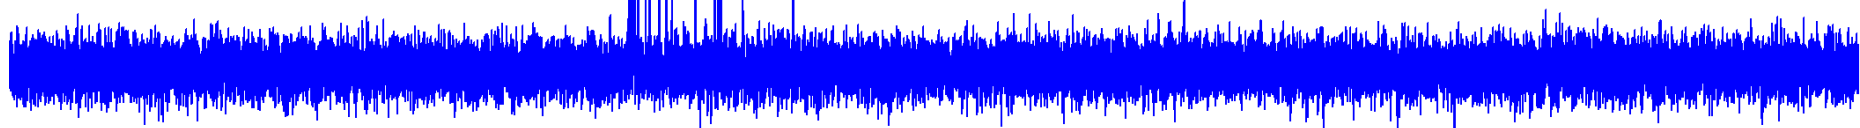

175.0

150.0

125.0

100.0

75.0

50.0

25.0

ppm

# $^1\text{H}$ NMR-spectrum (400.13 MHz) ( $\text{CDCl}_3$ )

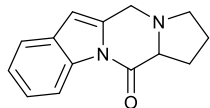

11a

8.448  
8.428

7.519  
7.501  
7.348  
7.330  
7.310  
7.300  
7.282  
7.264

6.385

4.324  
4.286  
3.896  
3.858  
3.492  
3.474  
3.456  
3.044  
3.027  
3.007  
2.990  
2.696  
2.677  
2.656  
2.636  
2.353  
2.340  
2.332  
2.314  
2.298  
1.965  
1.947  
1.927  
1.908  
1.891

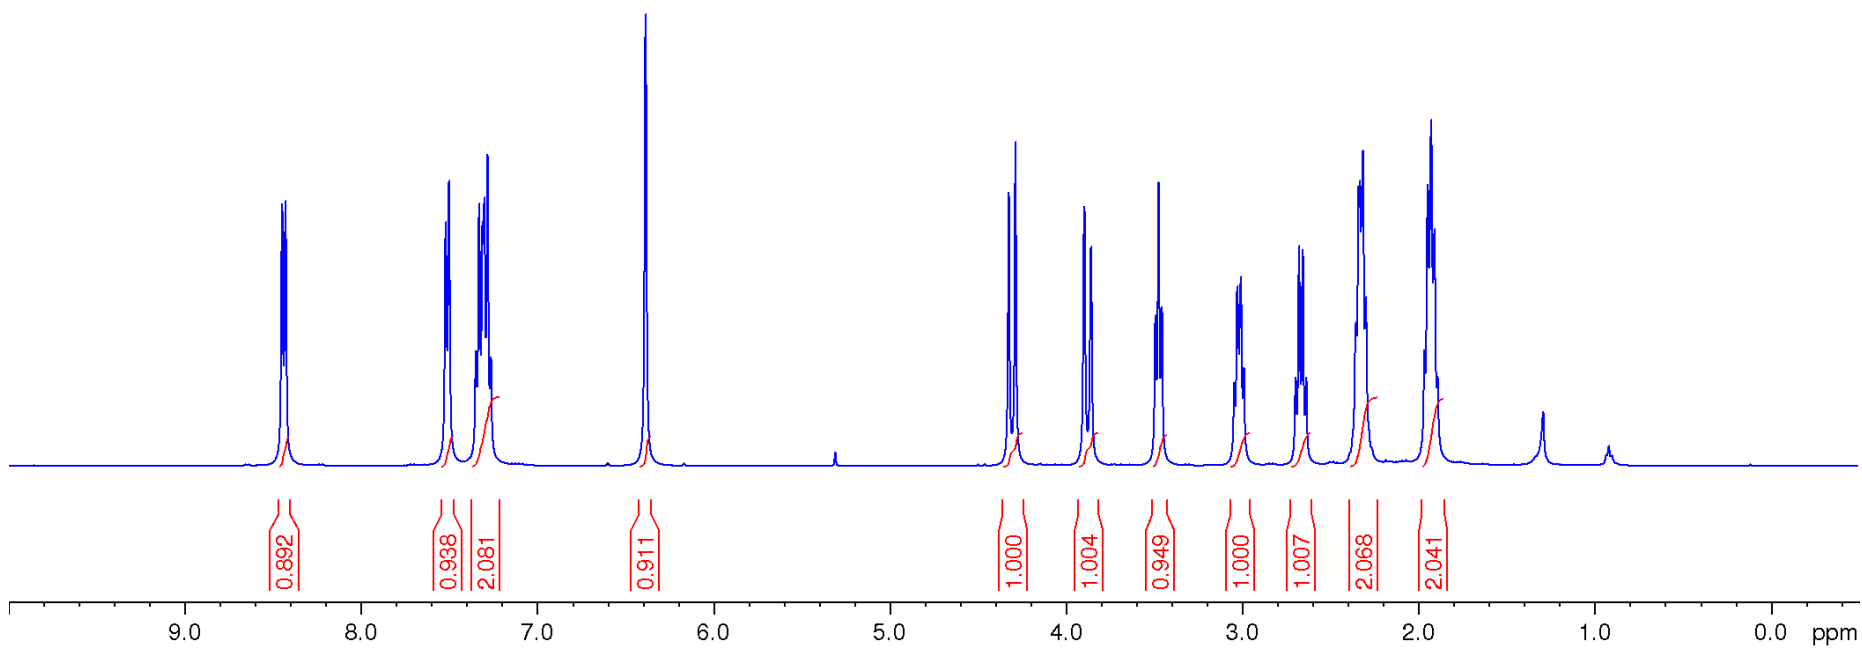



$^{13}\text{C}$  NMR-spectrum (100.6 MHz) ( $\text{CDCl}_3$ )

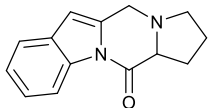

11a

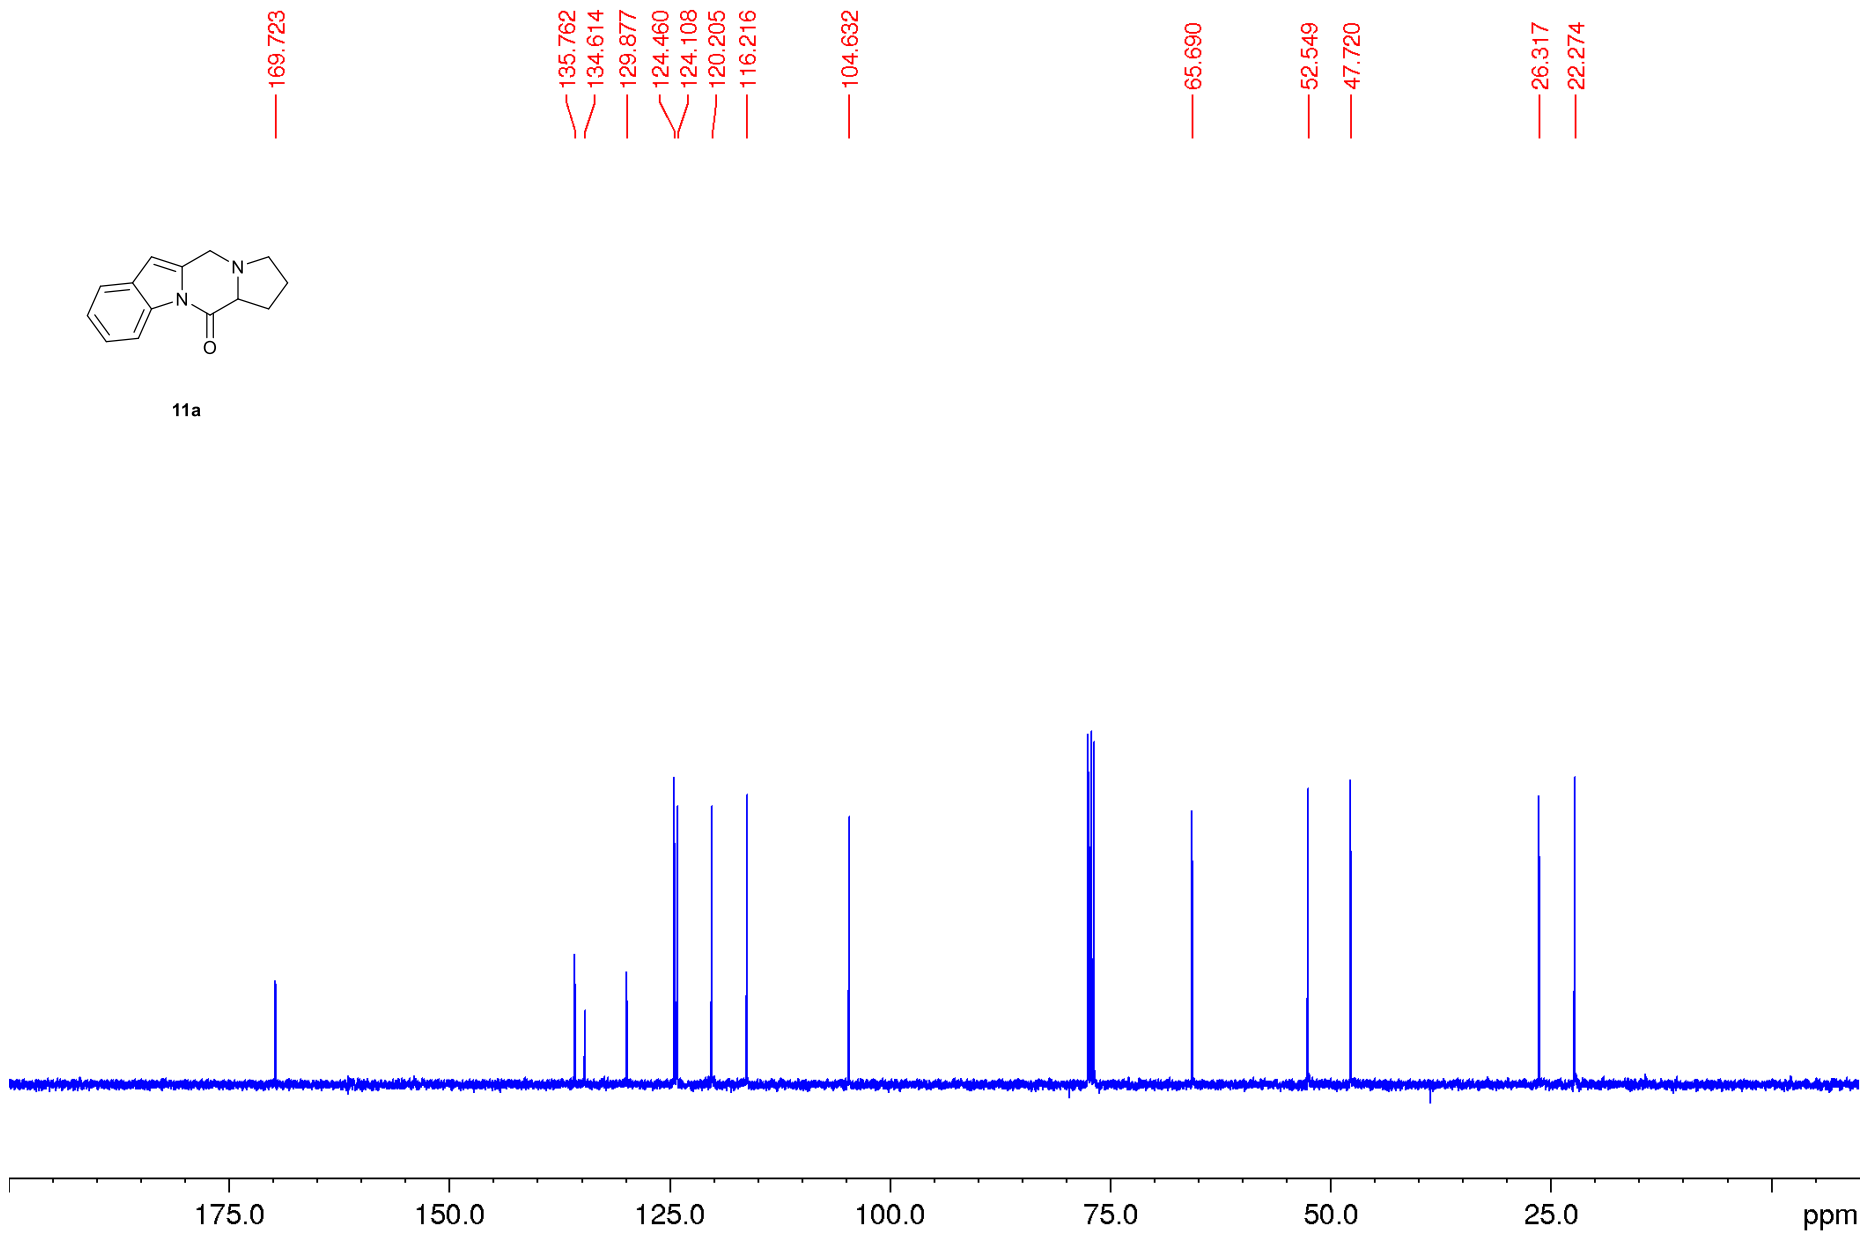

# DEPT 135 NMR-spectrum (CDCl<sub>3</sub>)



11a

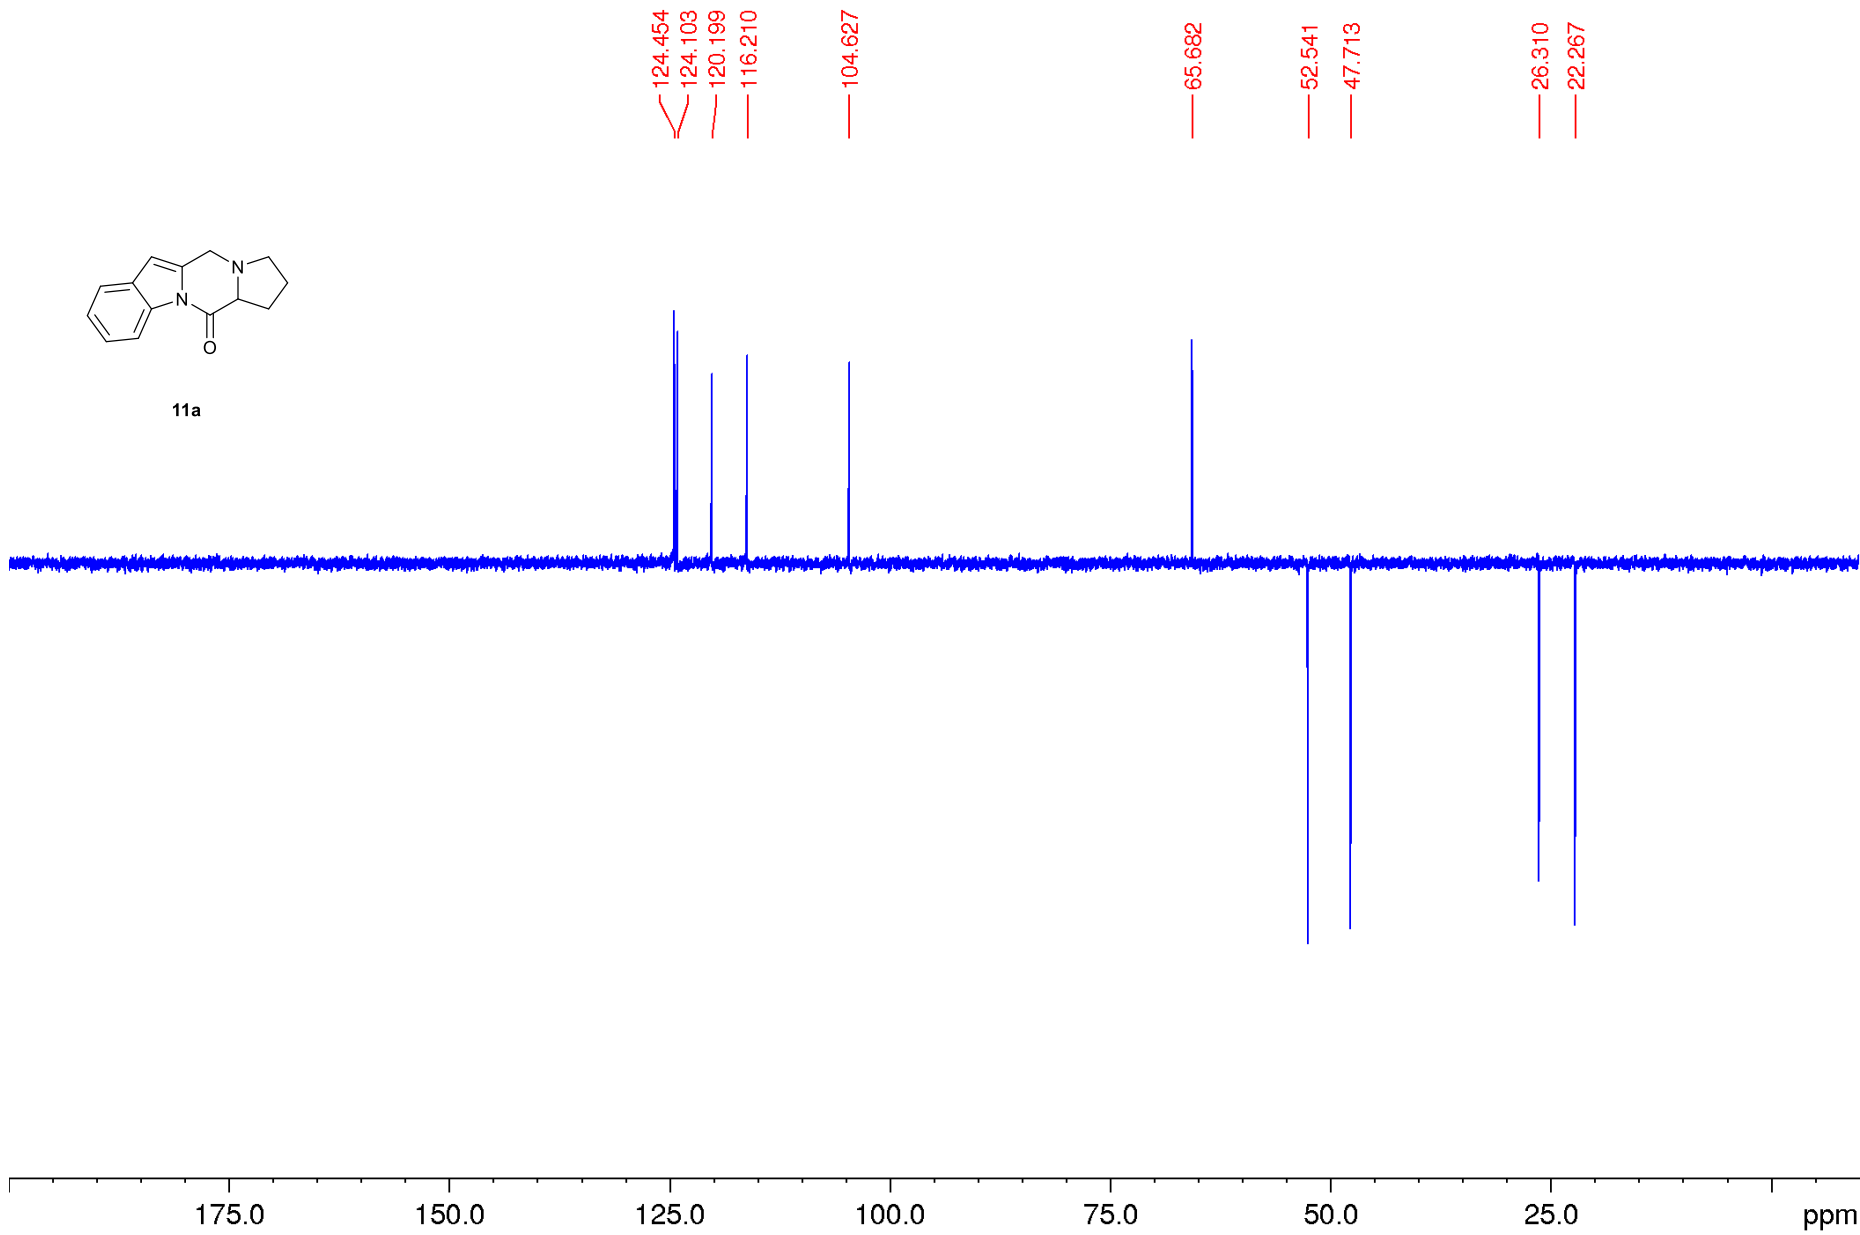

# <sup>1</sup>H NMR-spectrum (400.13 MHz) (DMSO-d<sub>6</sub>)

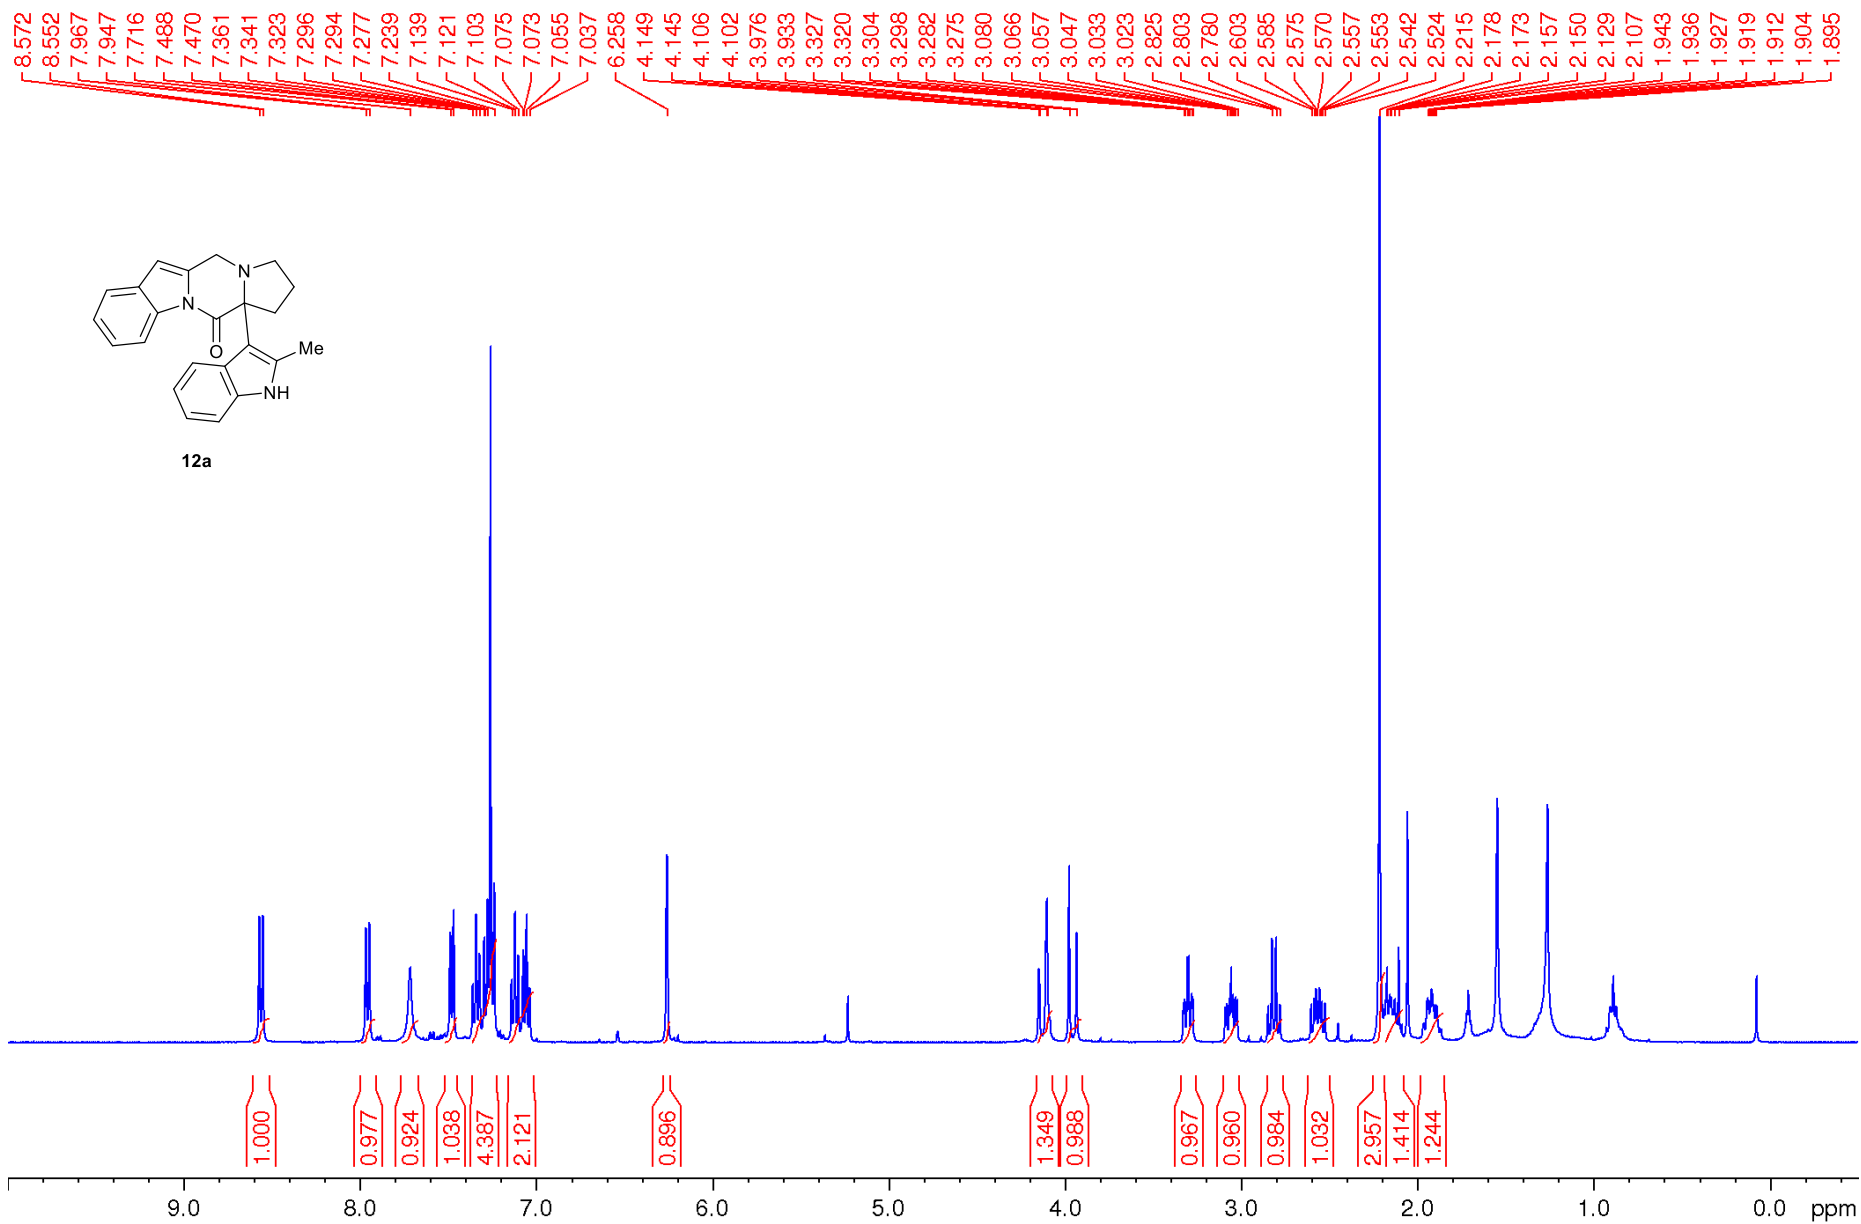

$^{13}\text{C}$  NMR-spectrum (100.6 MHz) ( $\text{DMSO-}d_6$ )

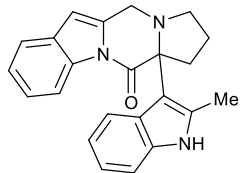

12a

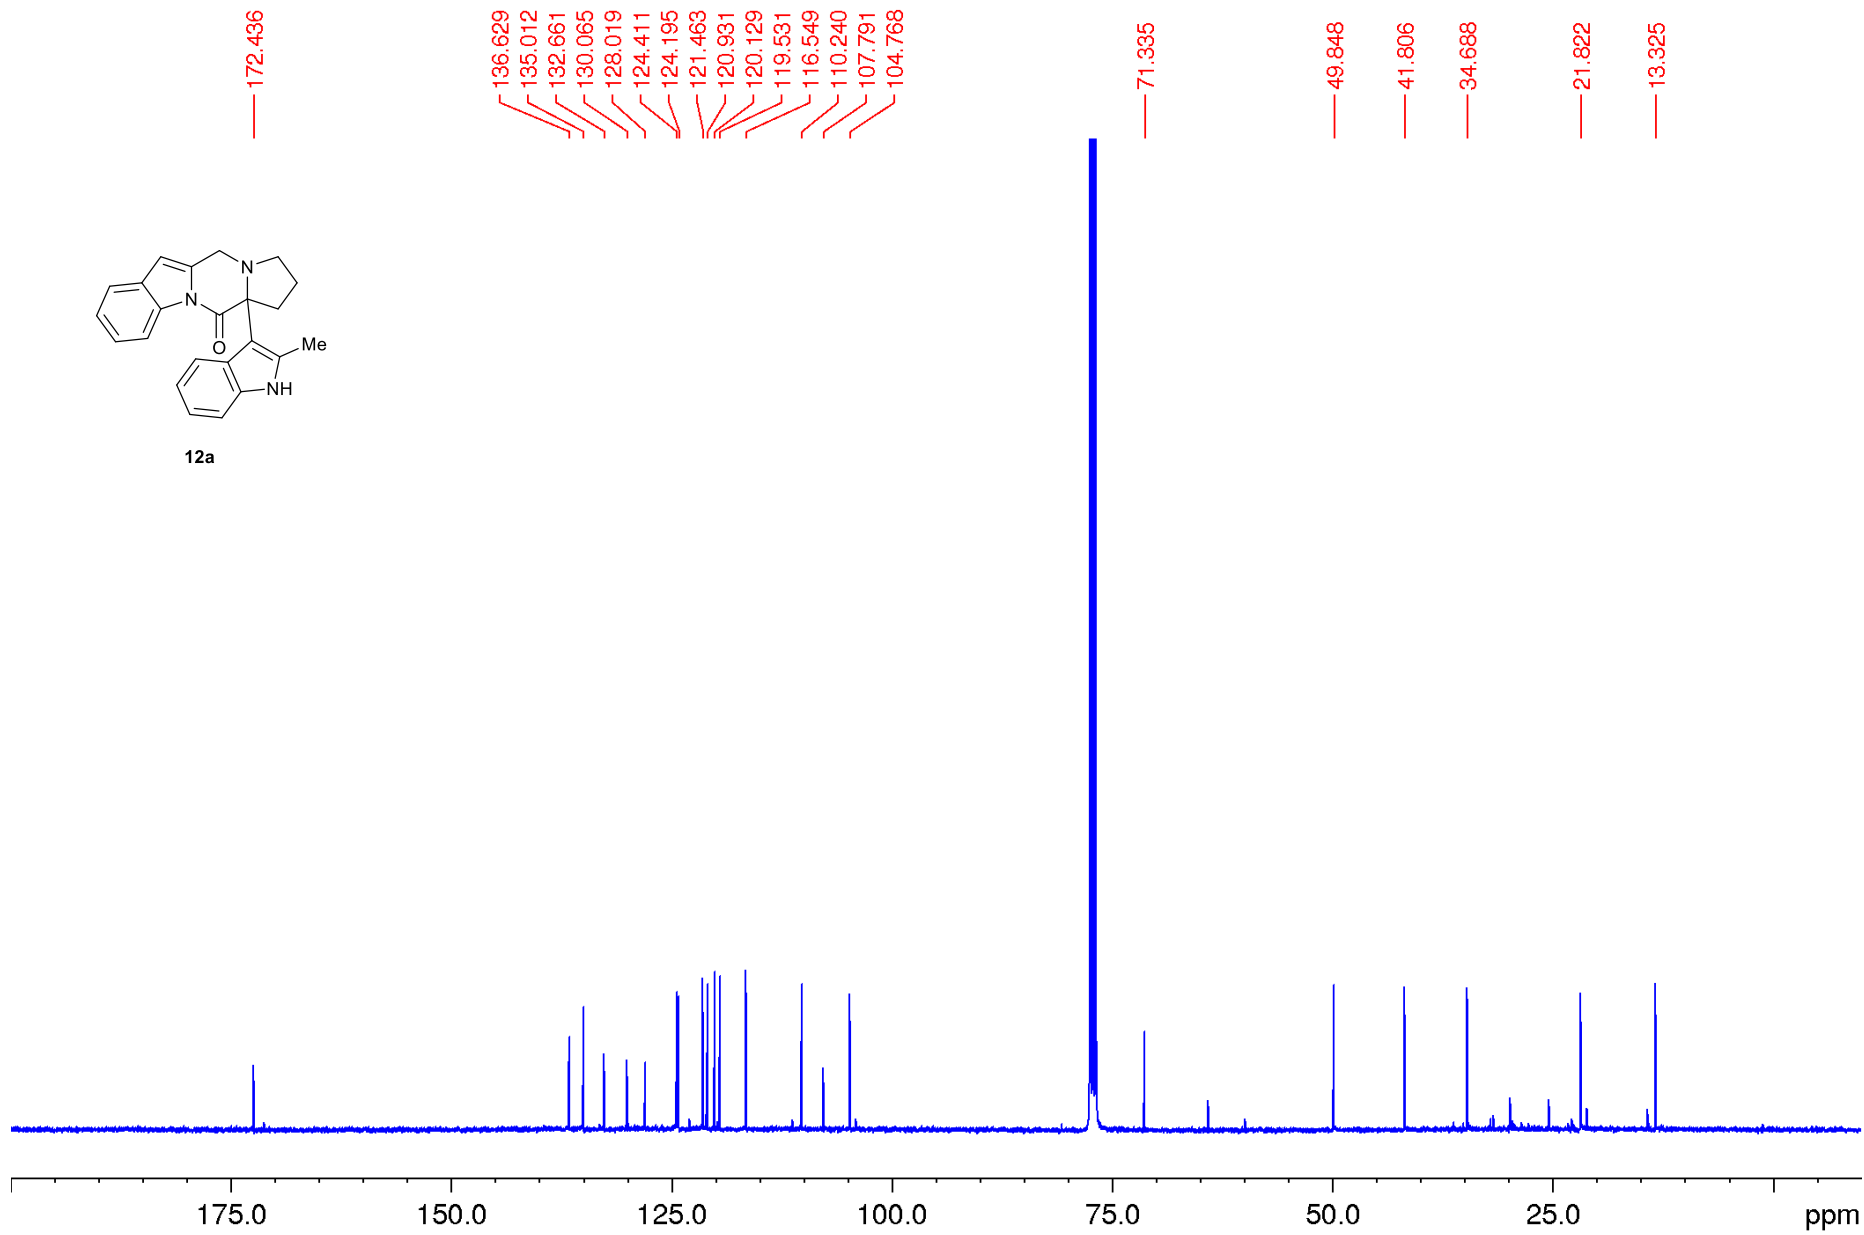

# DEPT 135 NMR-spectrum (DMSO- $d_6$ )

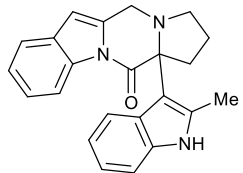

12a

124.381  
124.165  
121.434  
120.902  
120.099  
119.502  
116.520  
110.211  
104.739

49.820

41.778

34.660

21.795

13.297

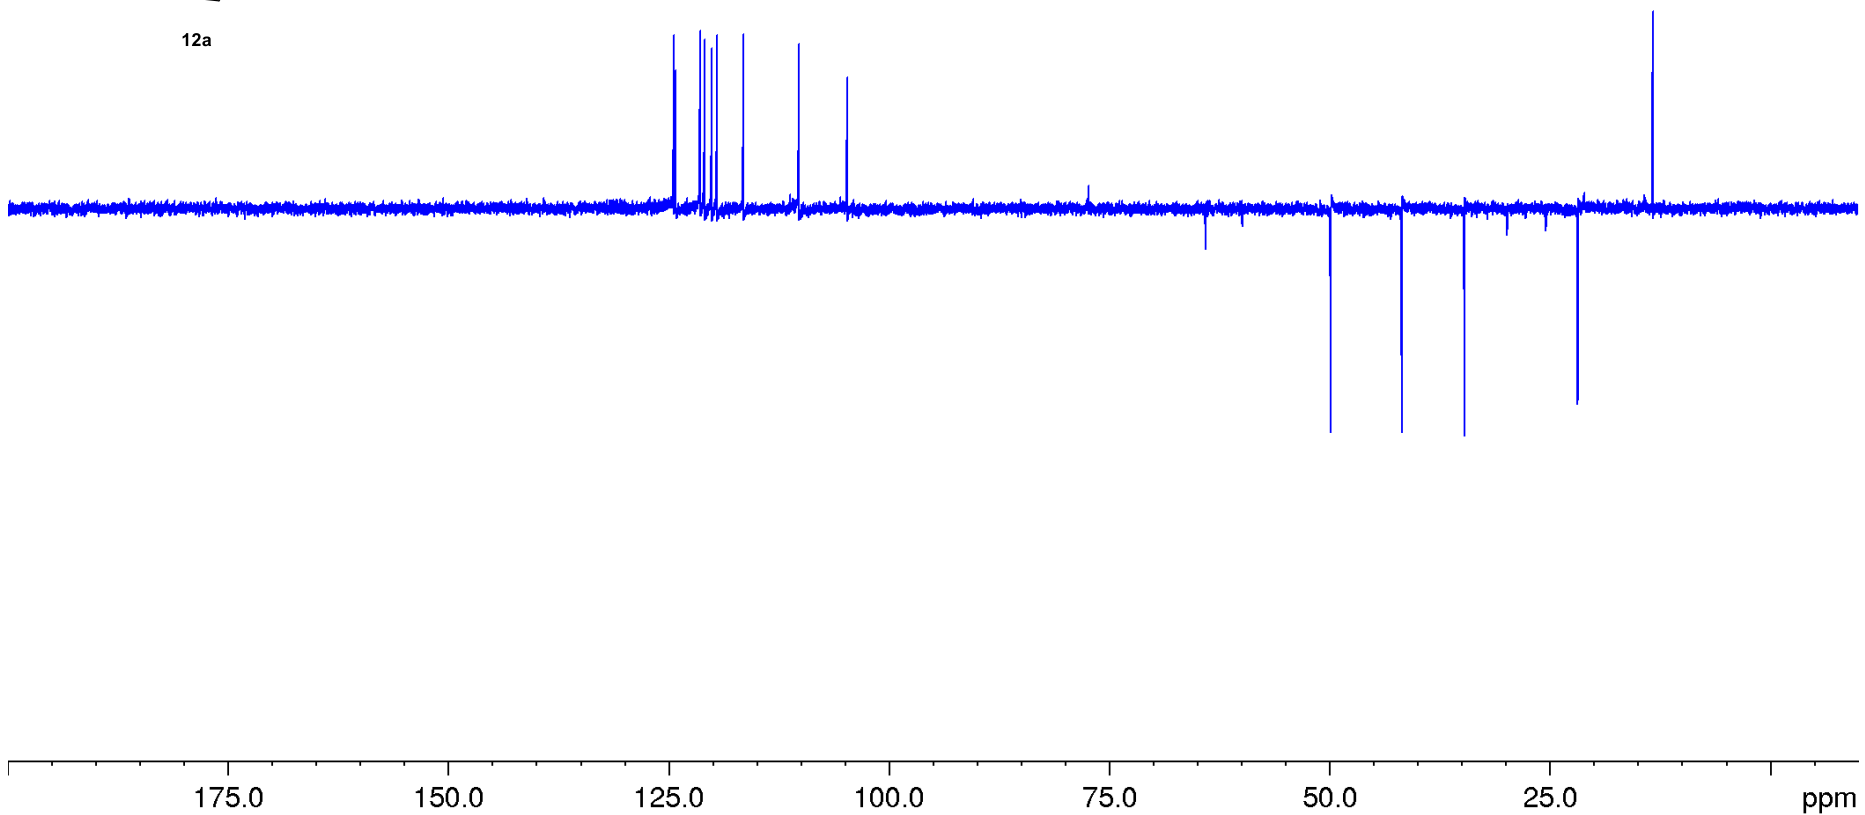

# <sup>1</sup>H NMR-spectrum (400.13 MHz) (CDCl<sub>3</sub>)

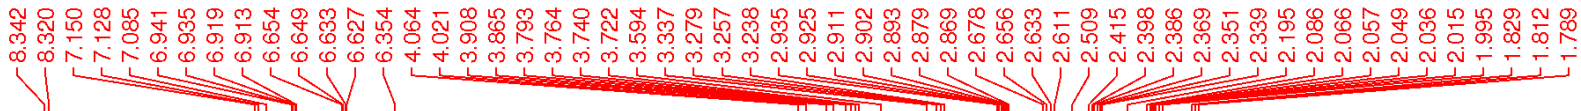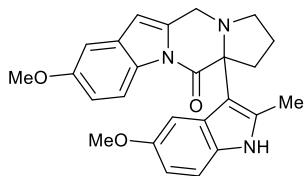

12b

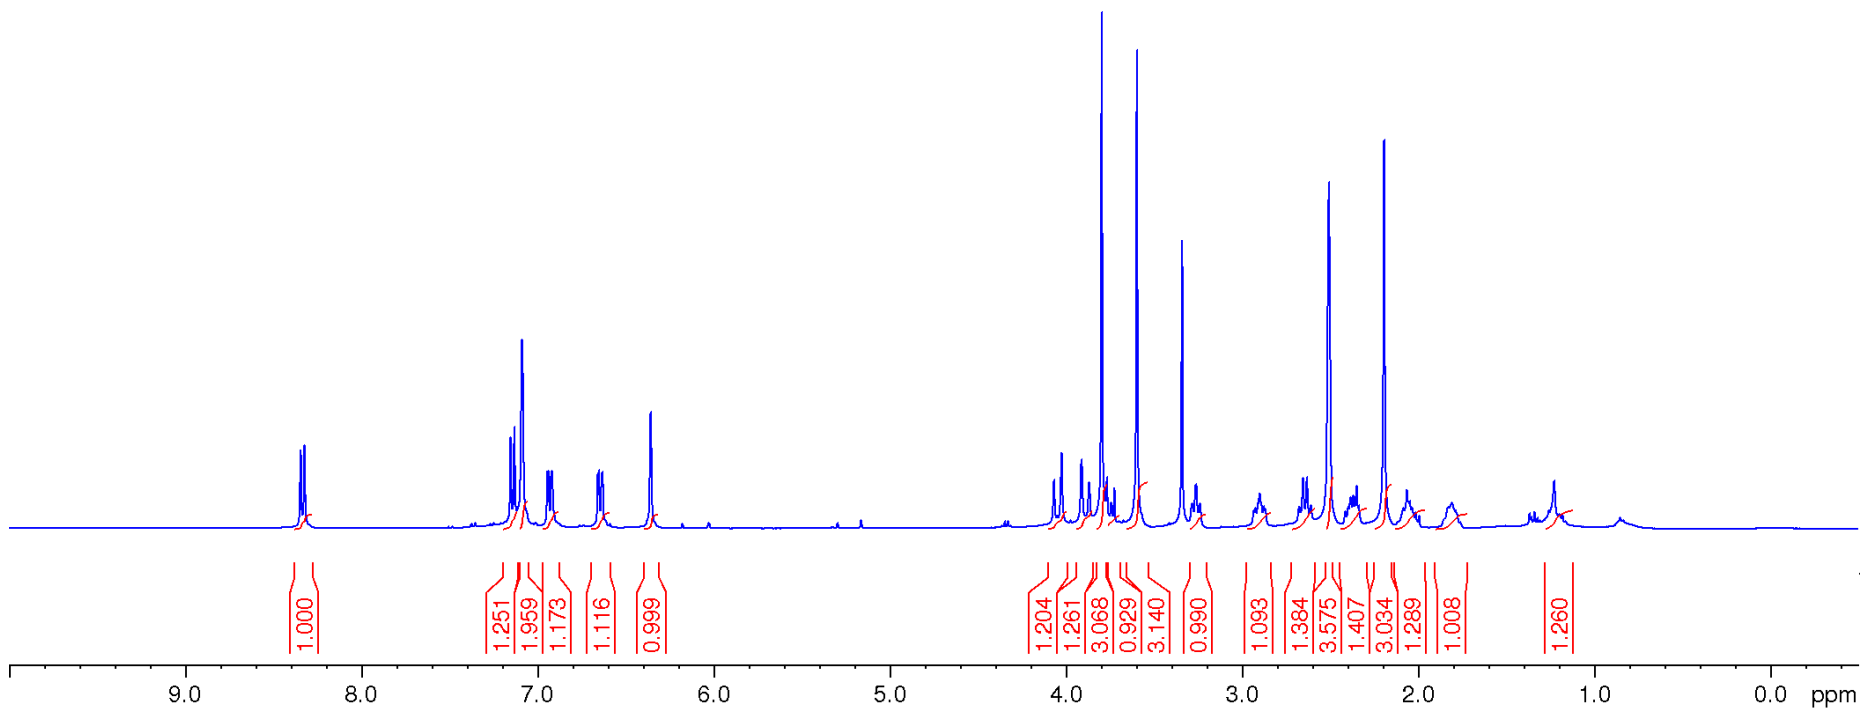

# $^{13}\text{C}$ NMR-spectrum (100.6 MHz) ( $\text{CDCl}_3$ )



12b

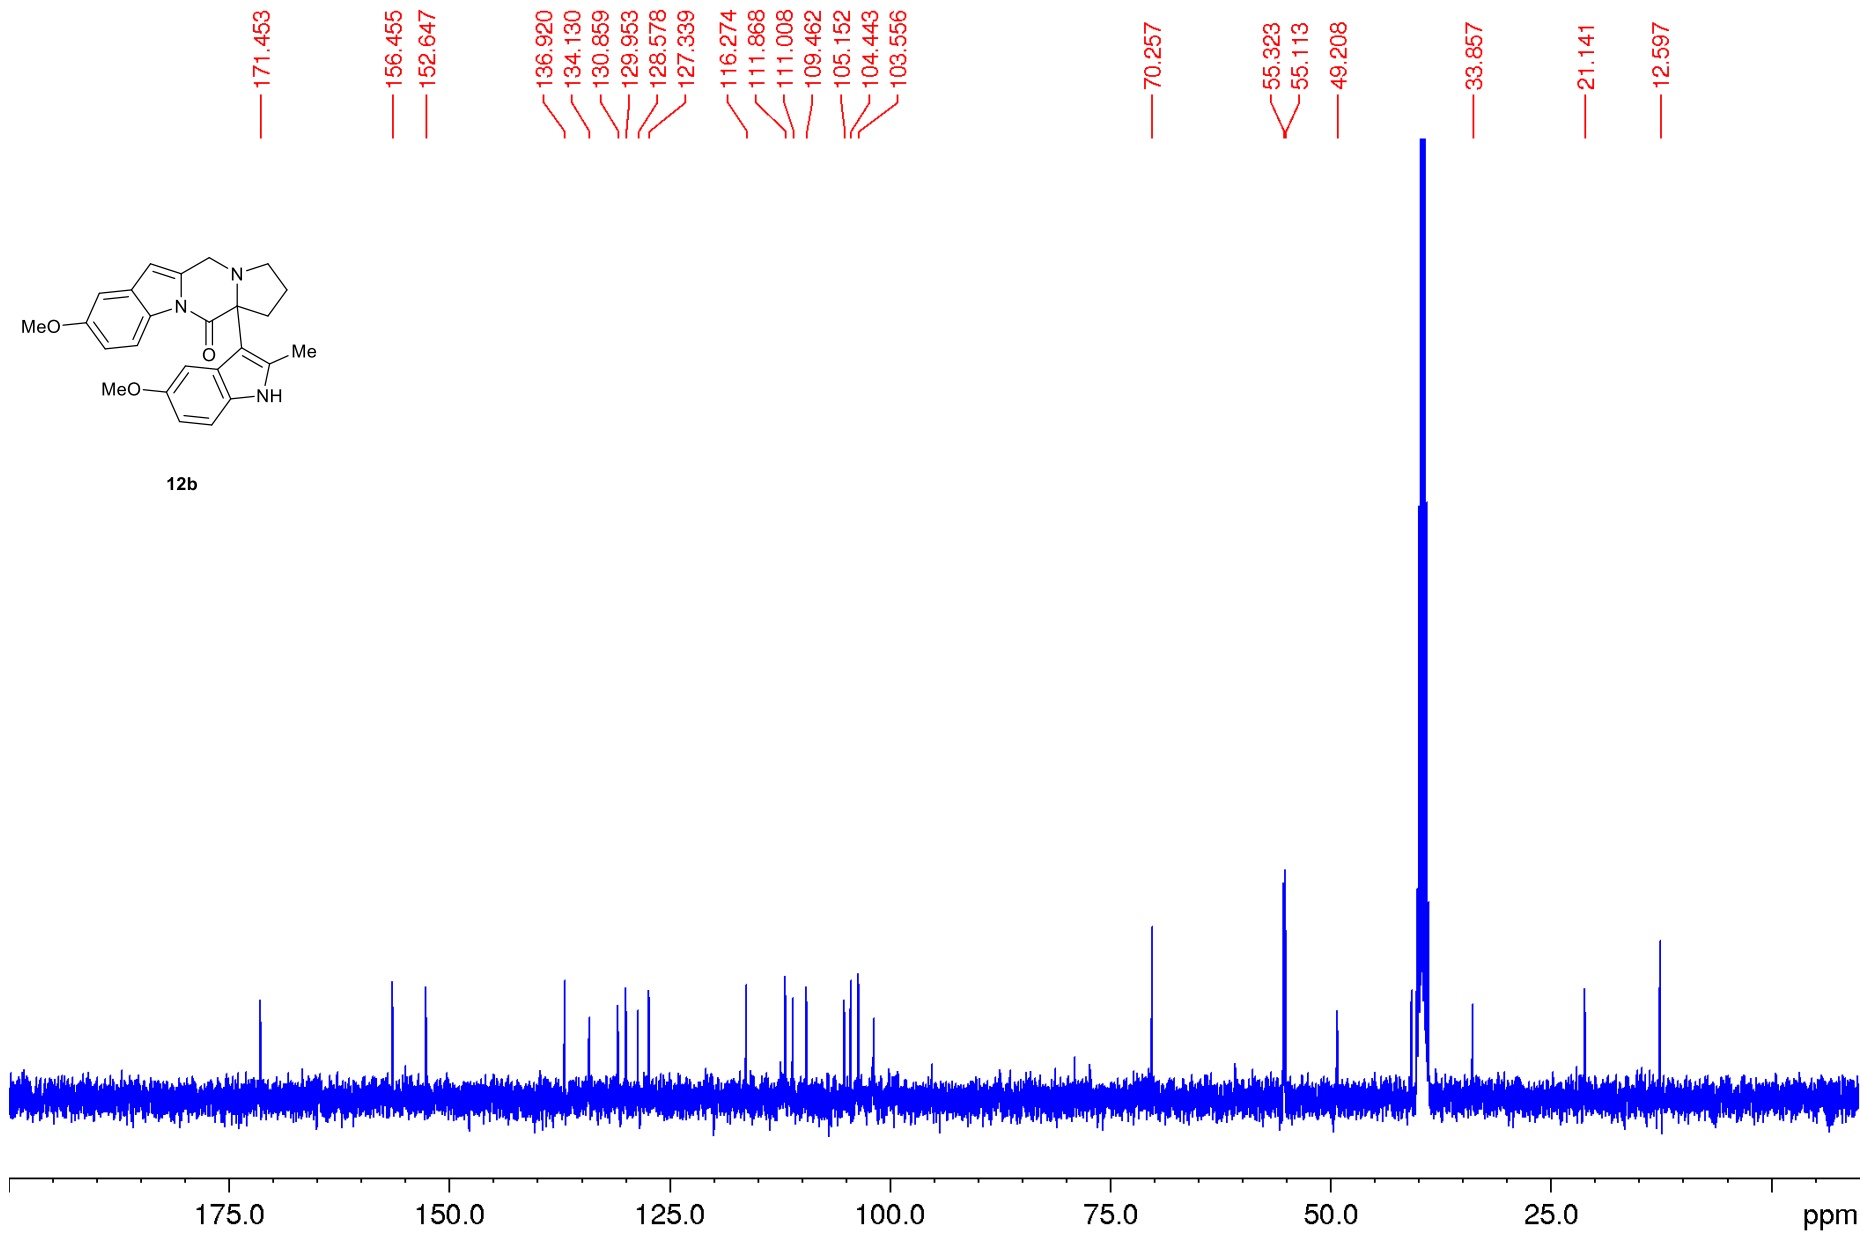

# DEPT 135 NMR-spectrum (CDCl<sub>3</sub>)



12b

116.781  
112.376  
111.517  
109.971  
104.951  
104.065  
102.337

55.833  
55.622

49.716

41.293

34.367

21.650

13.107

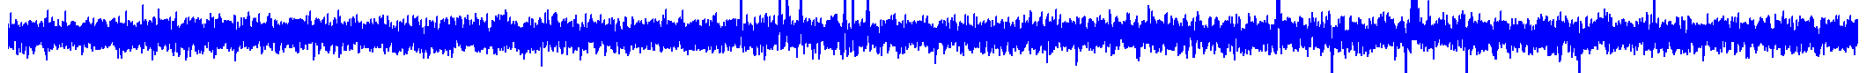

175.0

150.0

125.0

100.0

75.0

50.0

25.0

ppm

100



# <sup>1</sup>H NMR-spectrum (400.13 MHz) (CDCl<sub>3</sub>)

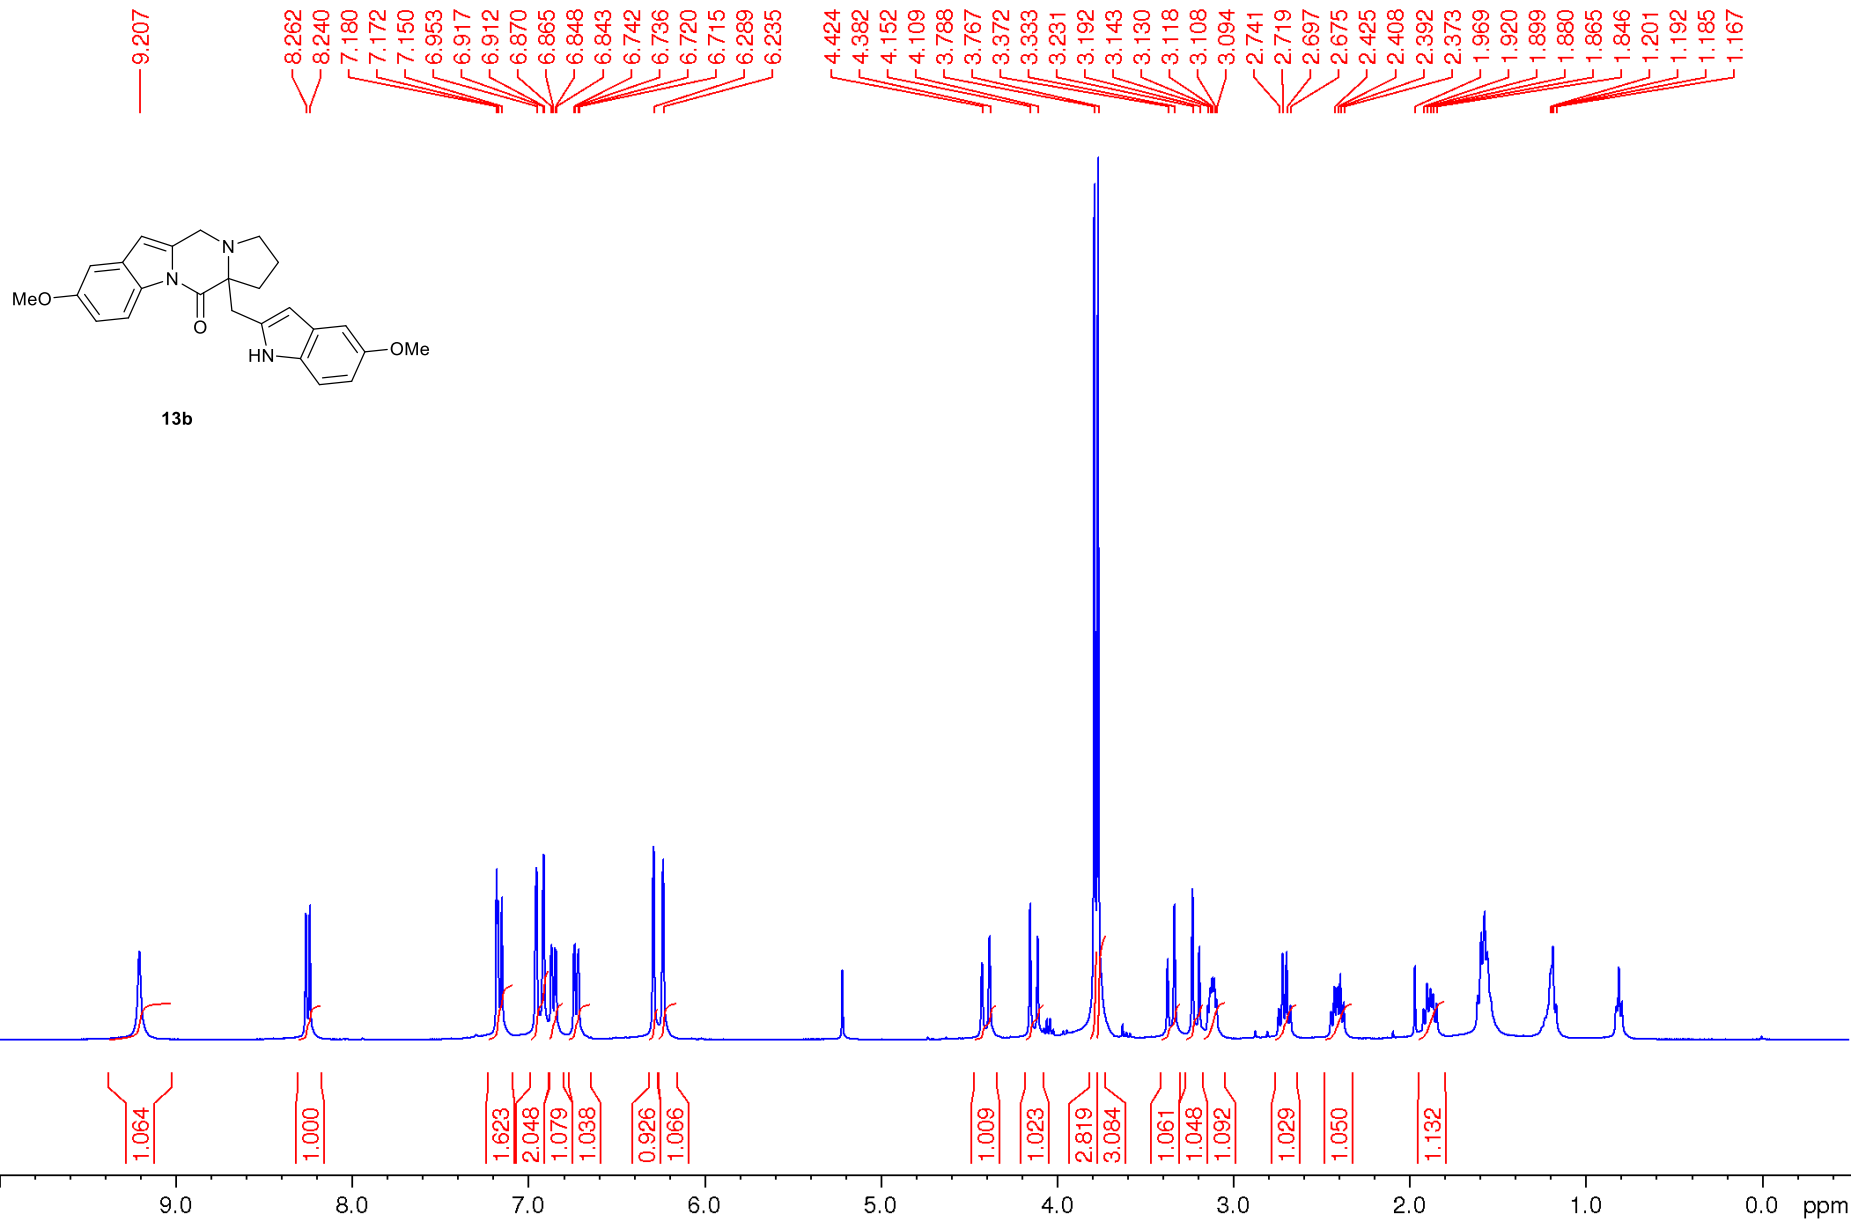

<sup>13</sup>C NMR-spectrum (100.6 MHz) (CDCl<sub>3</sub>)

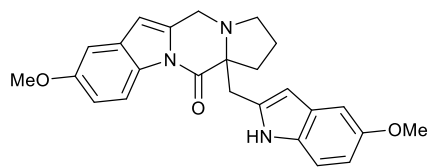

13b

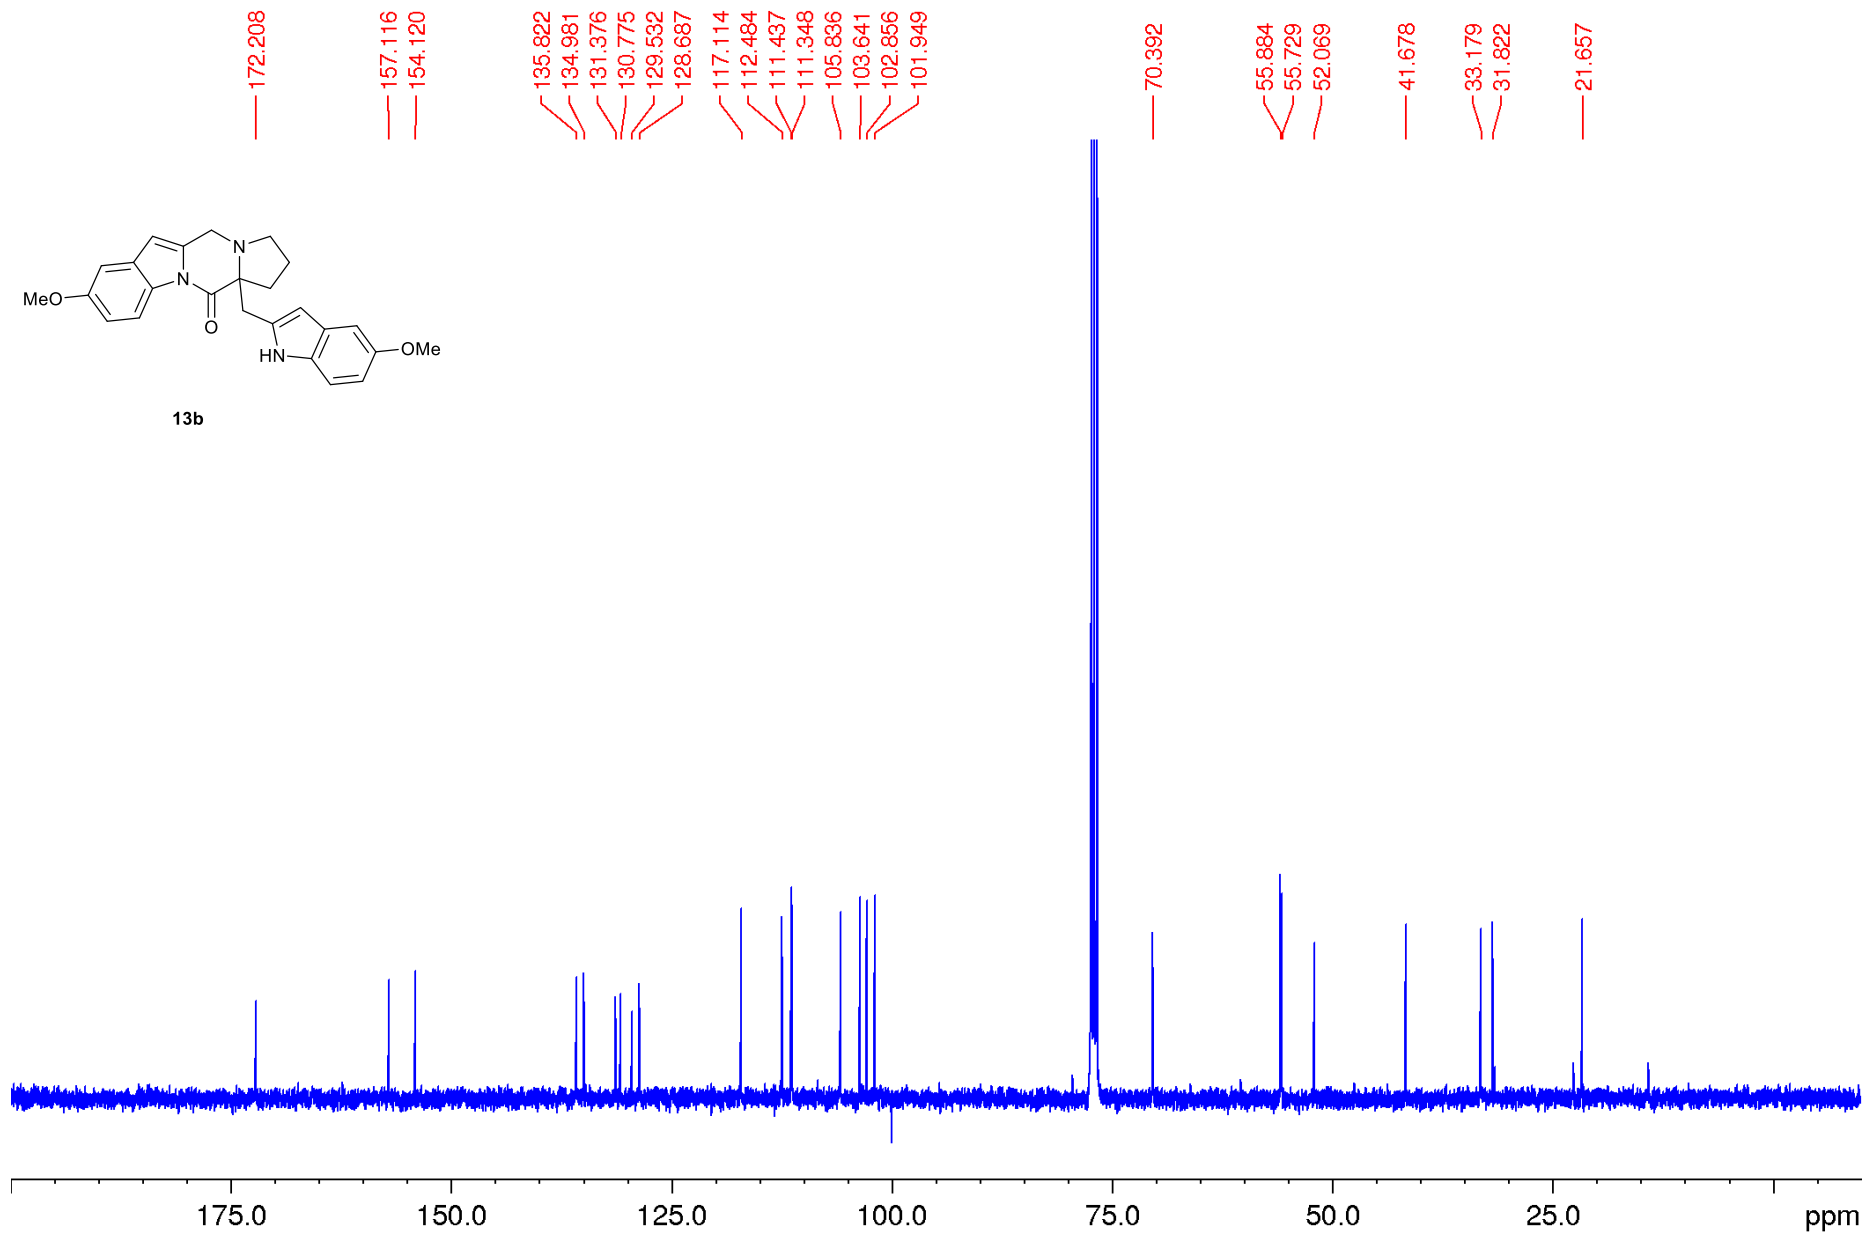

# DEPT 135 NMR-spectrum (CDCl<sub>3</sub>)

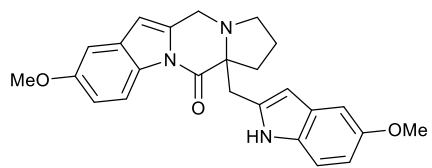

13b

117.110  
112.481  
111.495  
111.345  
105.833  
103.638  
102.854  
101.945

55.883  
55.725  
52.066

41.677

33.178  
31.822

21.657

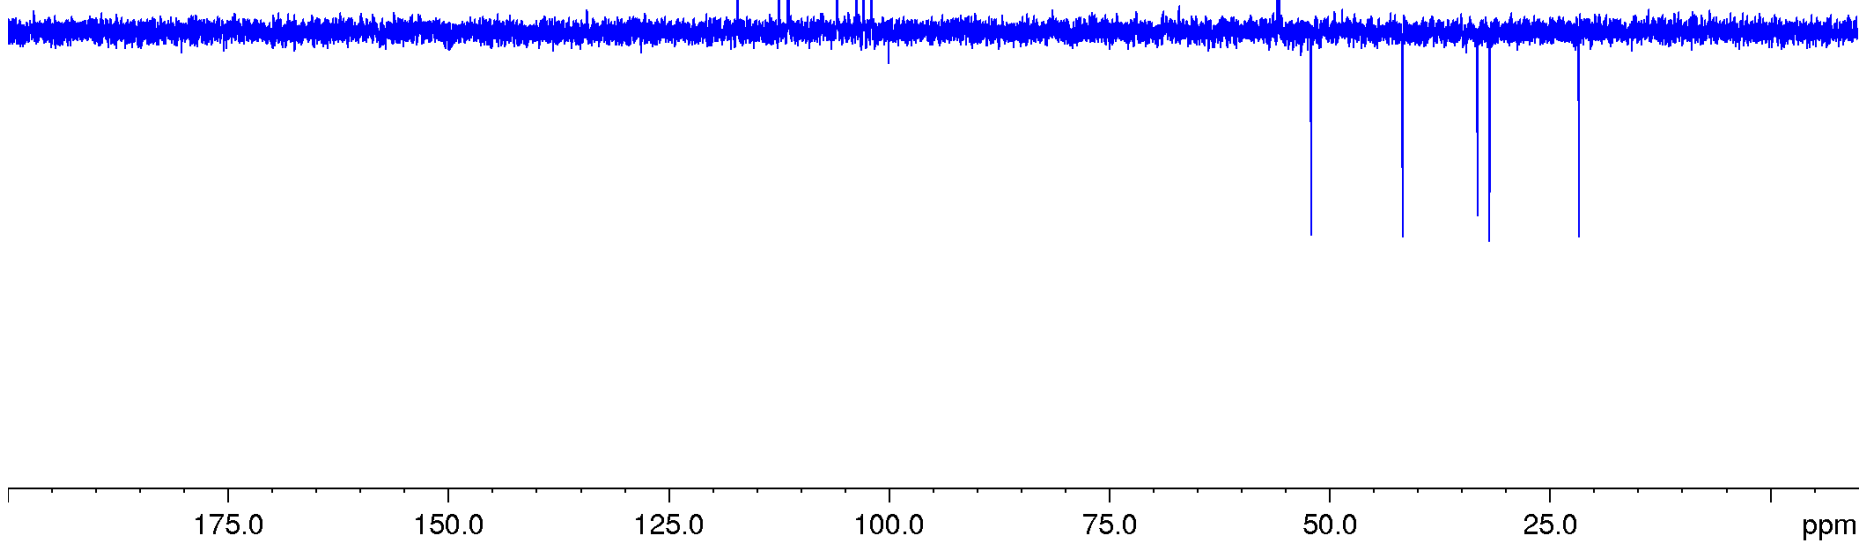

# <sup>1</sup>H NMR-spectrum (400.13 MHz) (CDCl<sub>3</sub>)

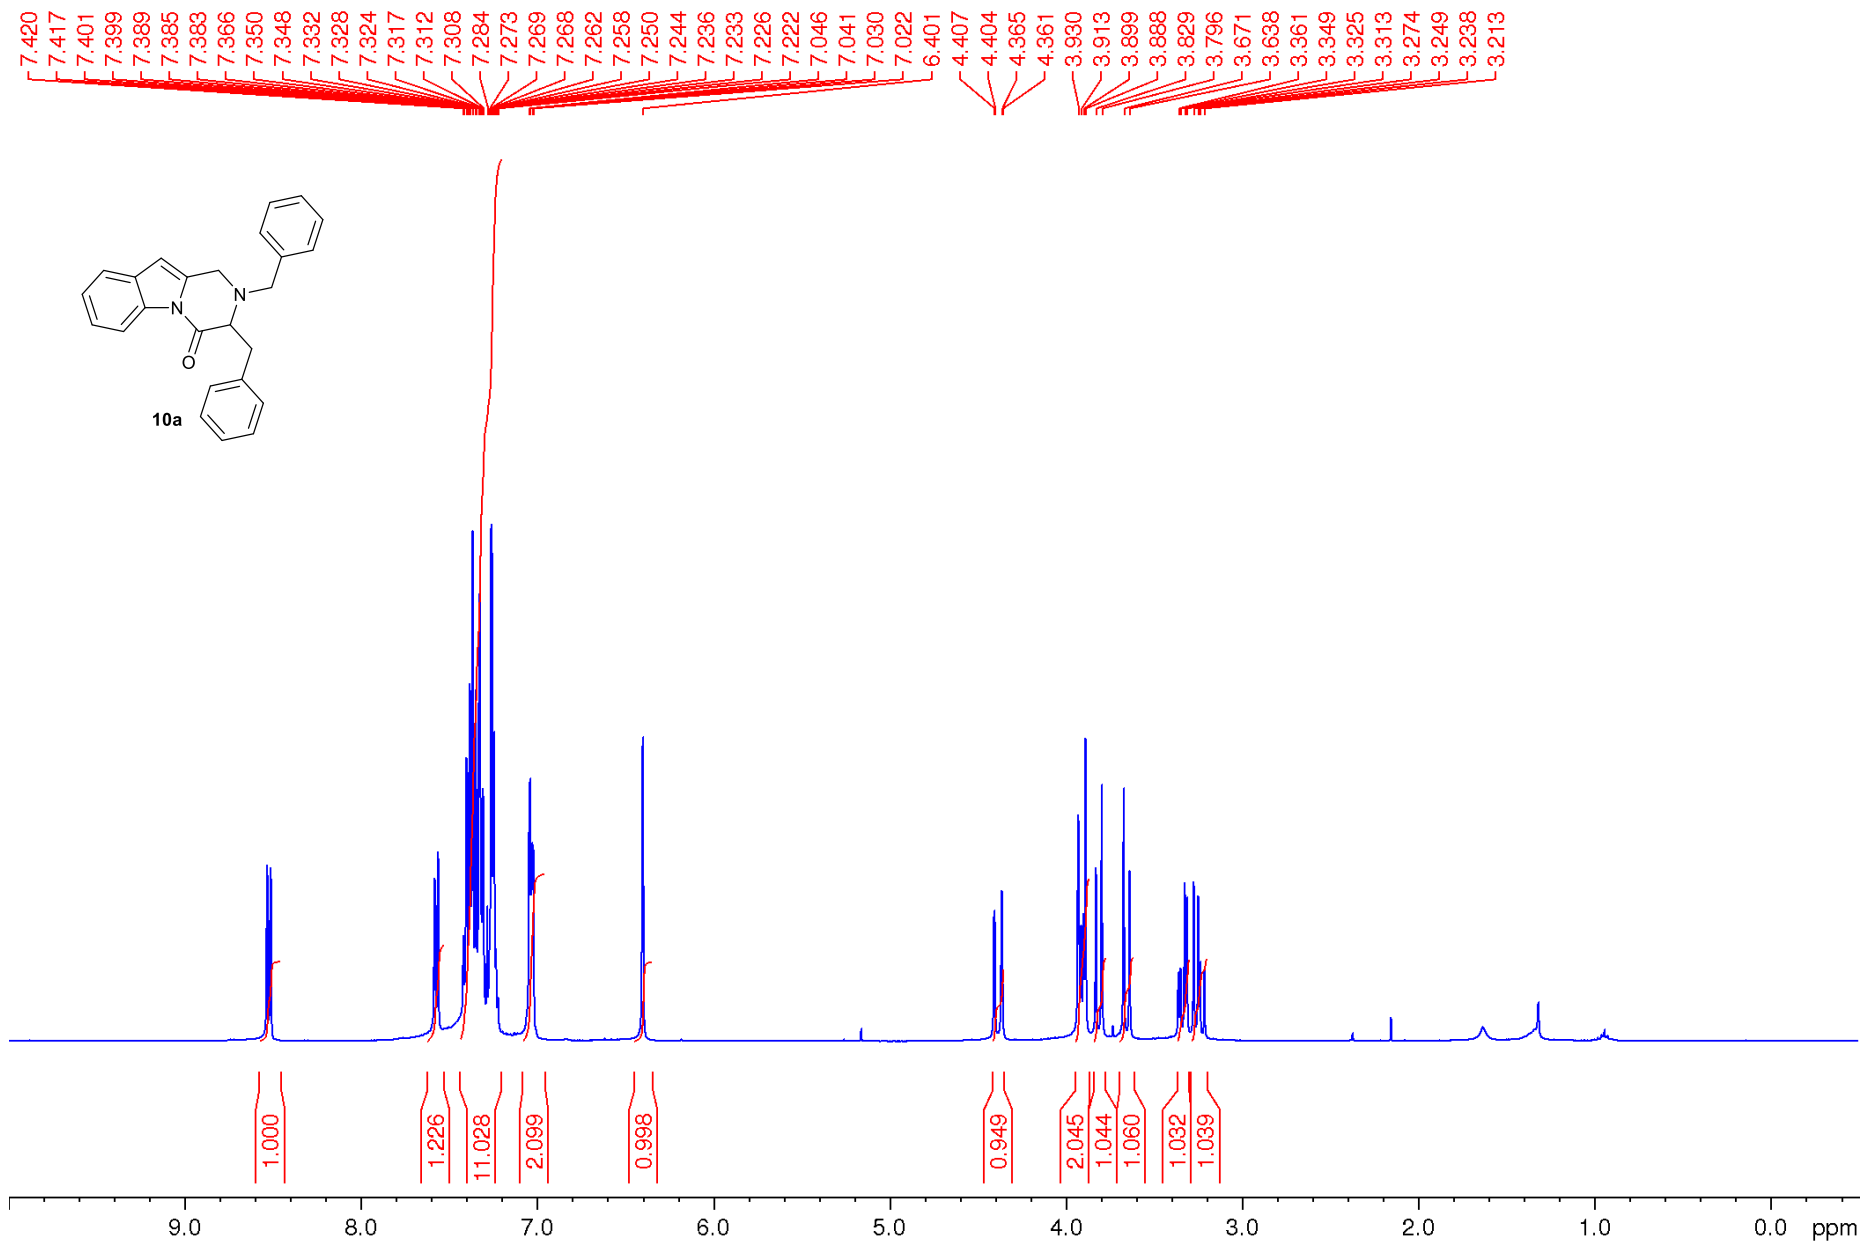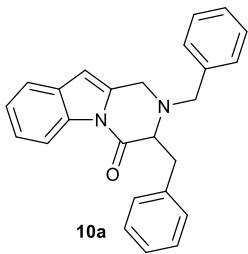

$^{13}\text{C}$  NMR-spectrum (100.6 MHz) ( $\text{CDCl}_3$ )

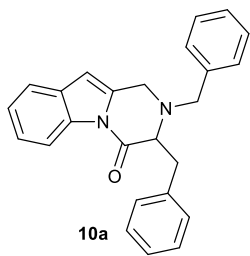

169.422  
138.167  
137.559  
134.863  
134.577  
129.733  
129.349  
128.771  
128.656  
128.421  
127.482  
126.673  
124.642  
124.343  
120.284  
116.504  
105.353

66.387  
58.070  
43.050  
35.484

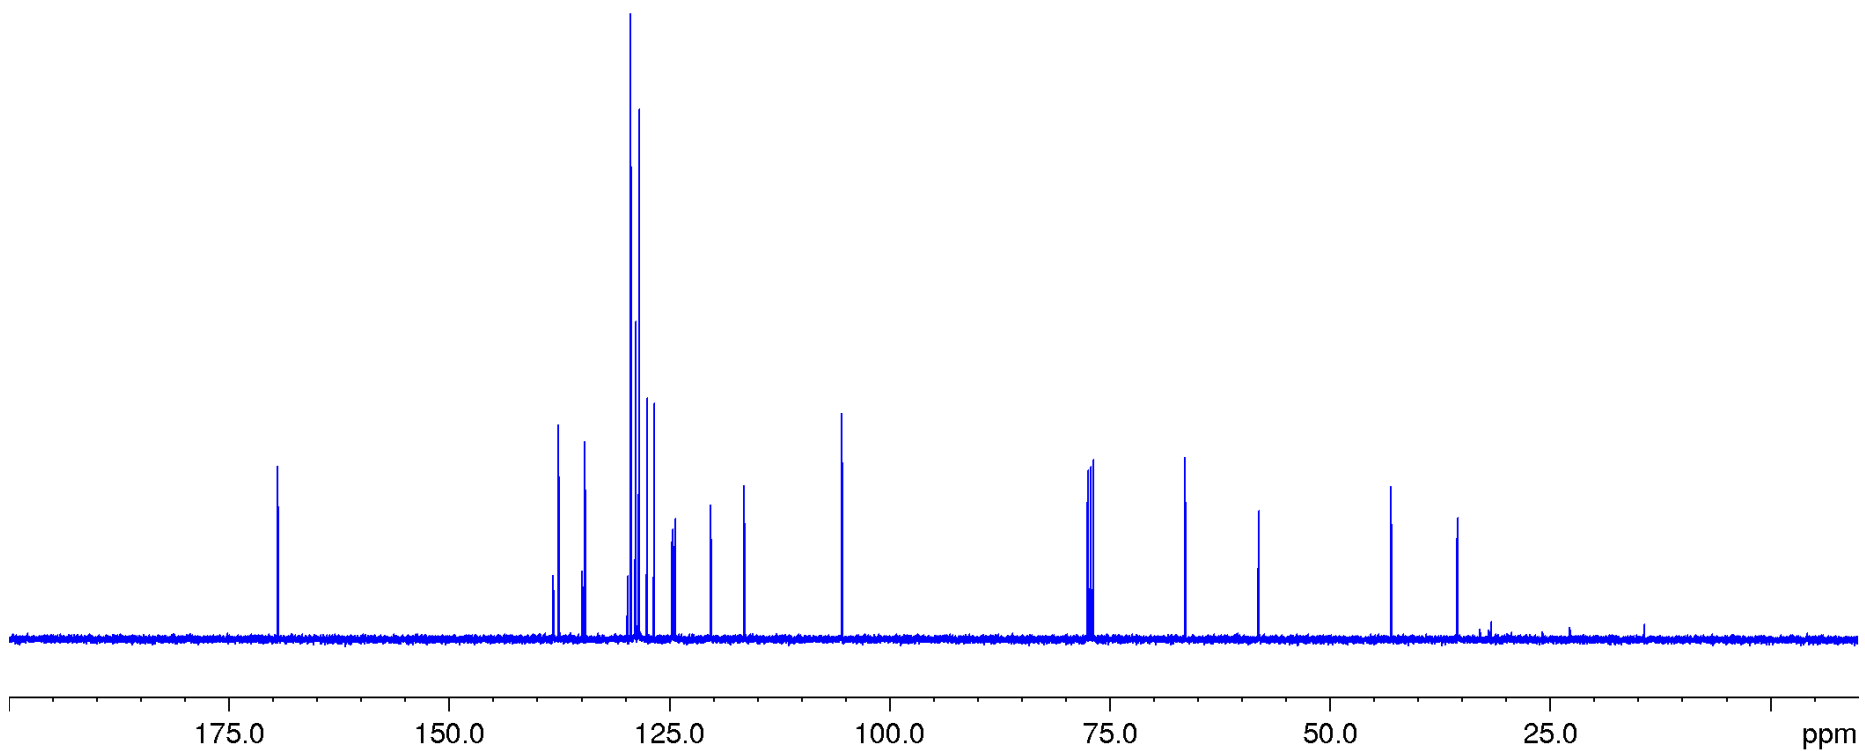

# DEPT 135 NMR-spectrum (CDCl<sub>3</sub>)

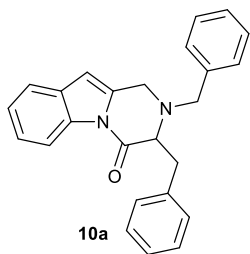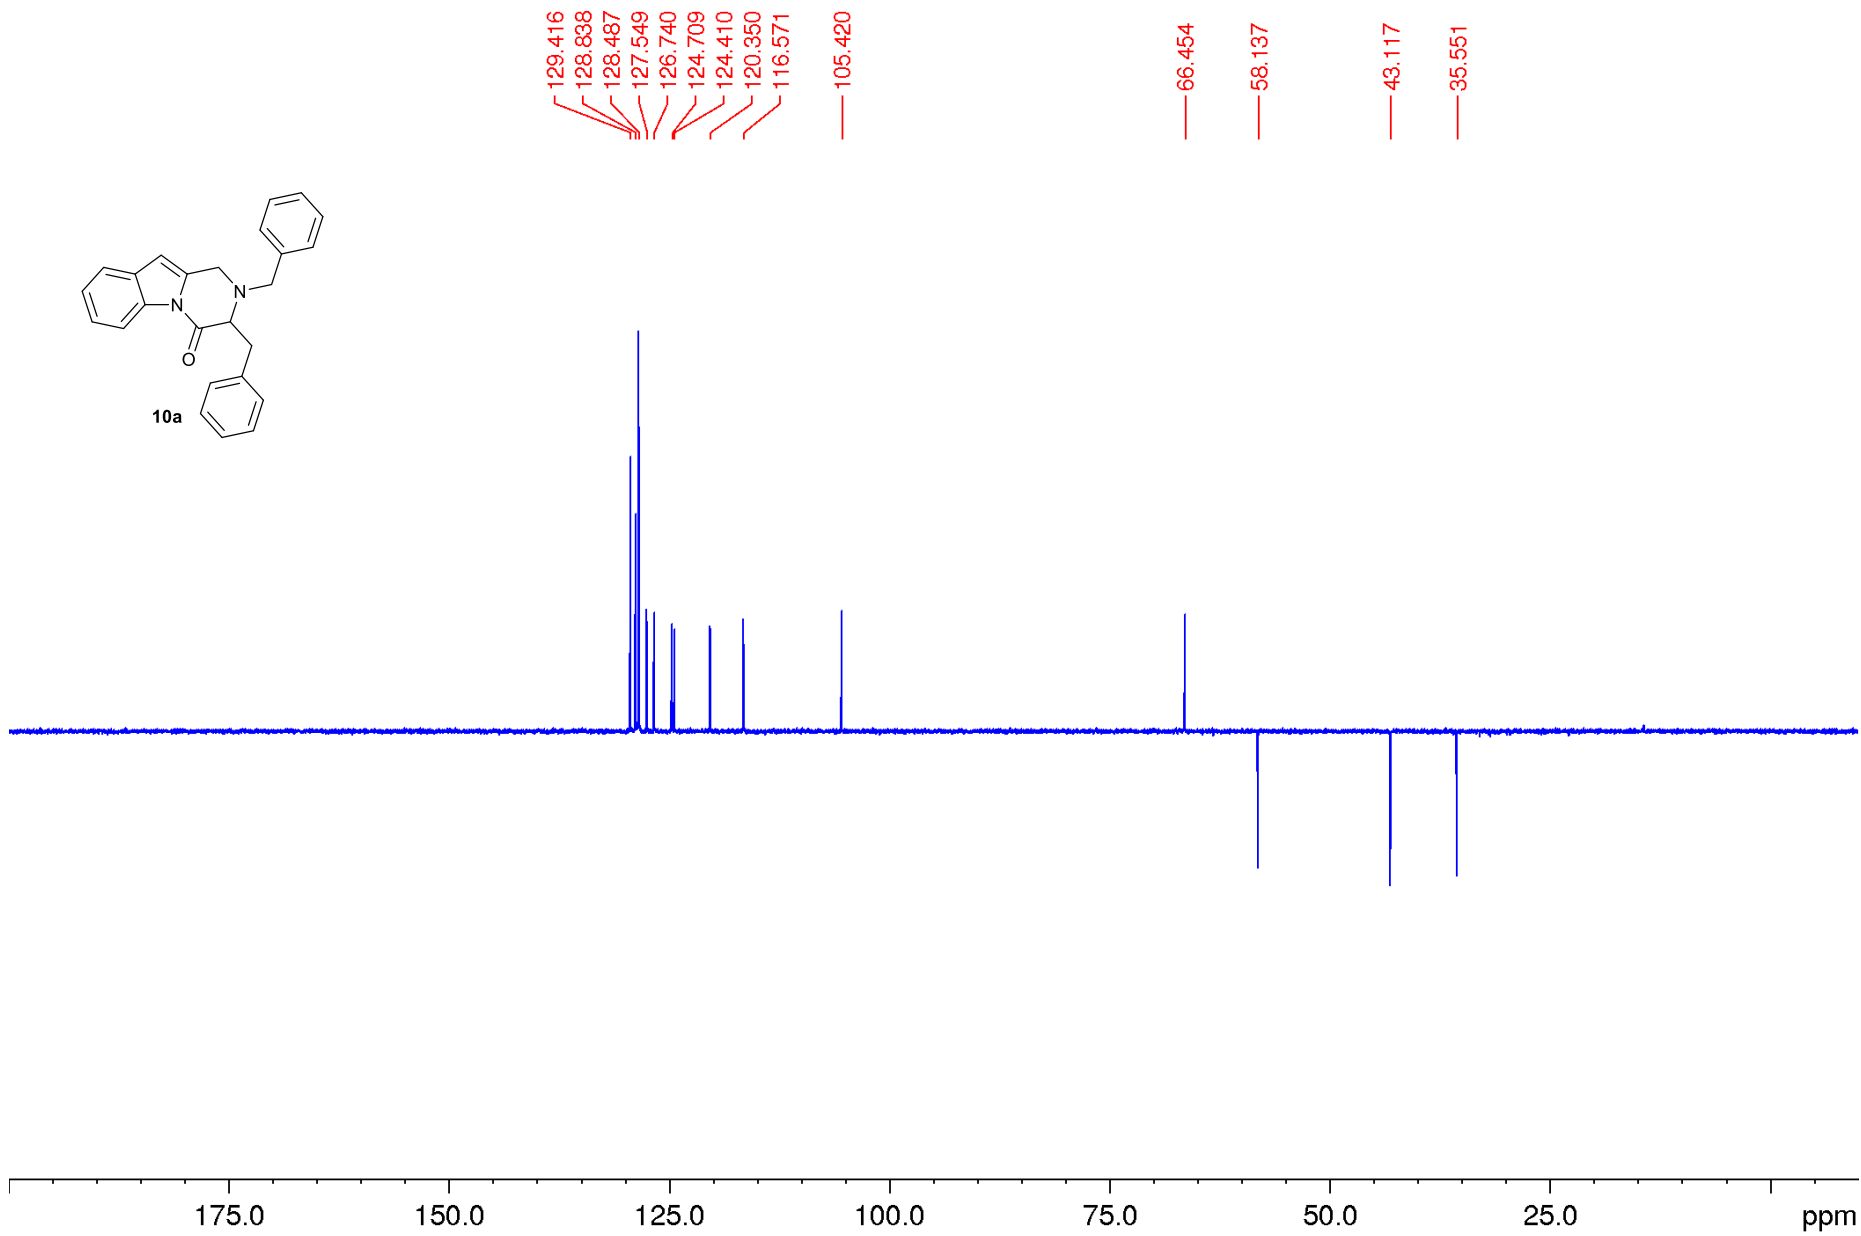

# <sup>1</sup>H NMR-spectrum (400.13 MHz) (CDCl<sub>3</sub>)

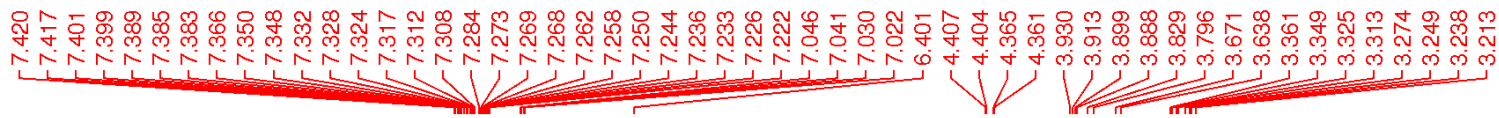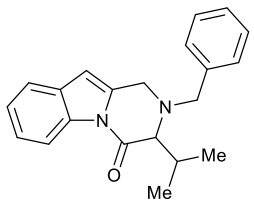

10b

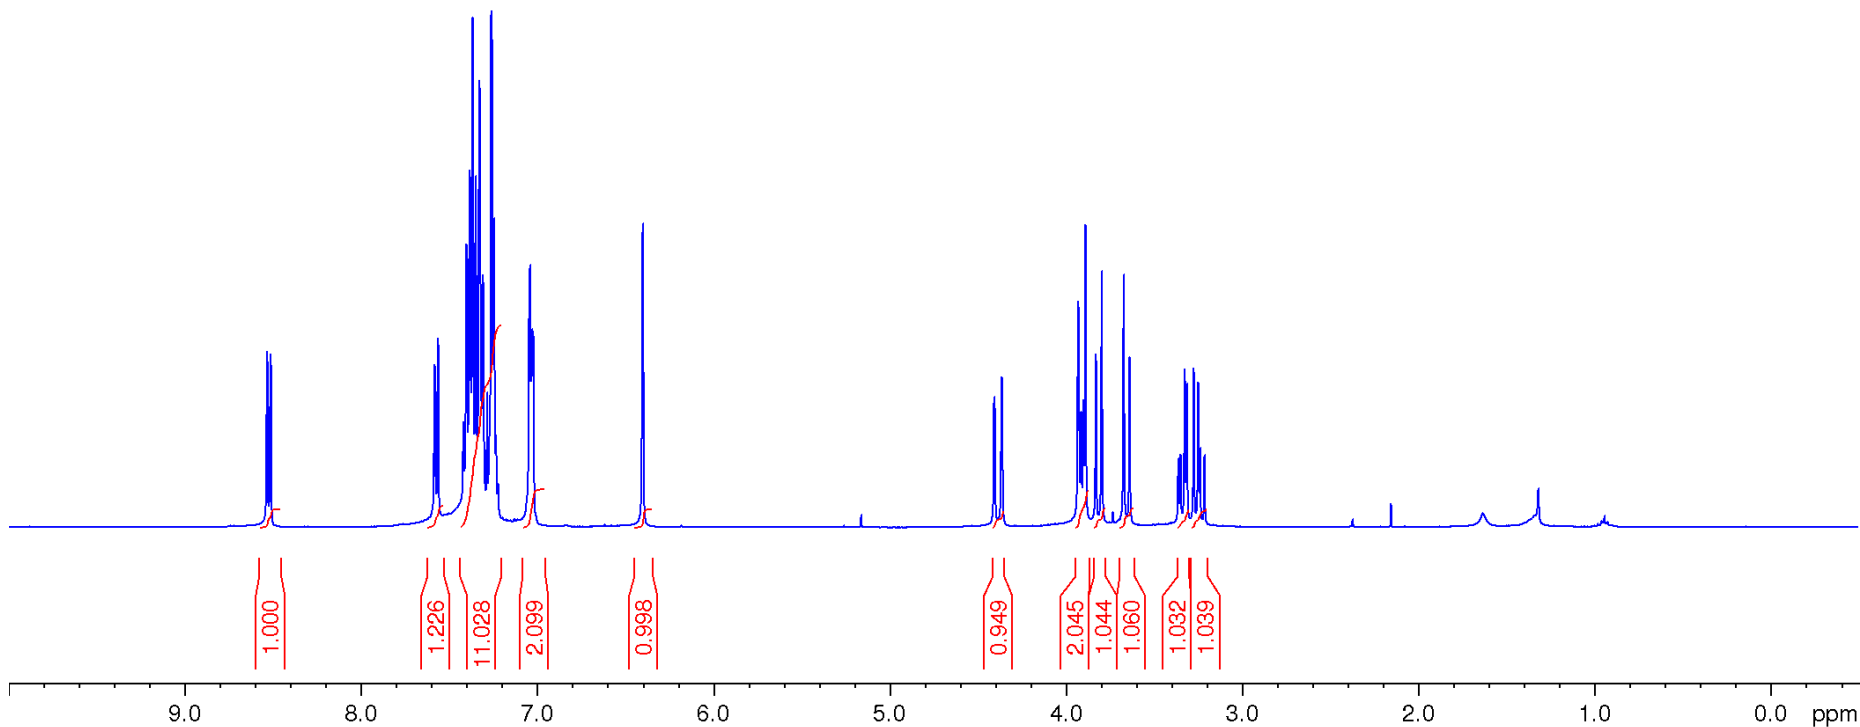

$^{13}\text{C}$  NMR-spectrum (100.6 MHz) ( $\text{CDCl}_3$ )

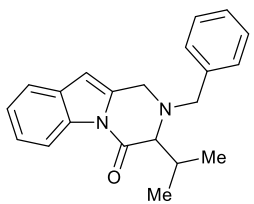

10b

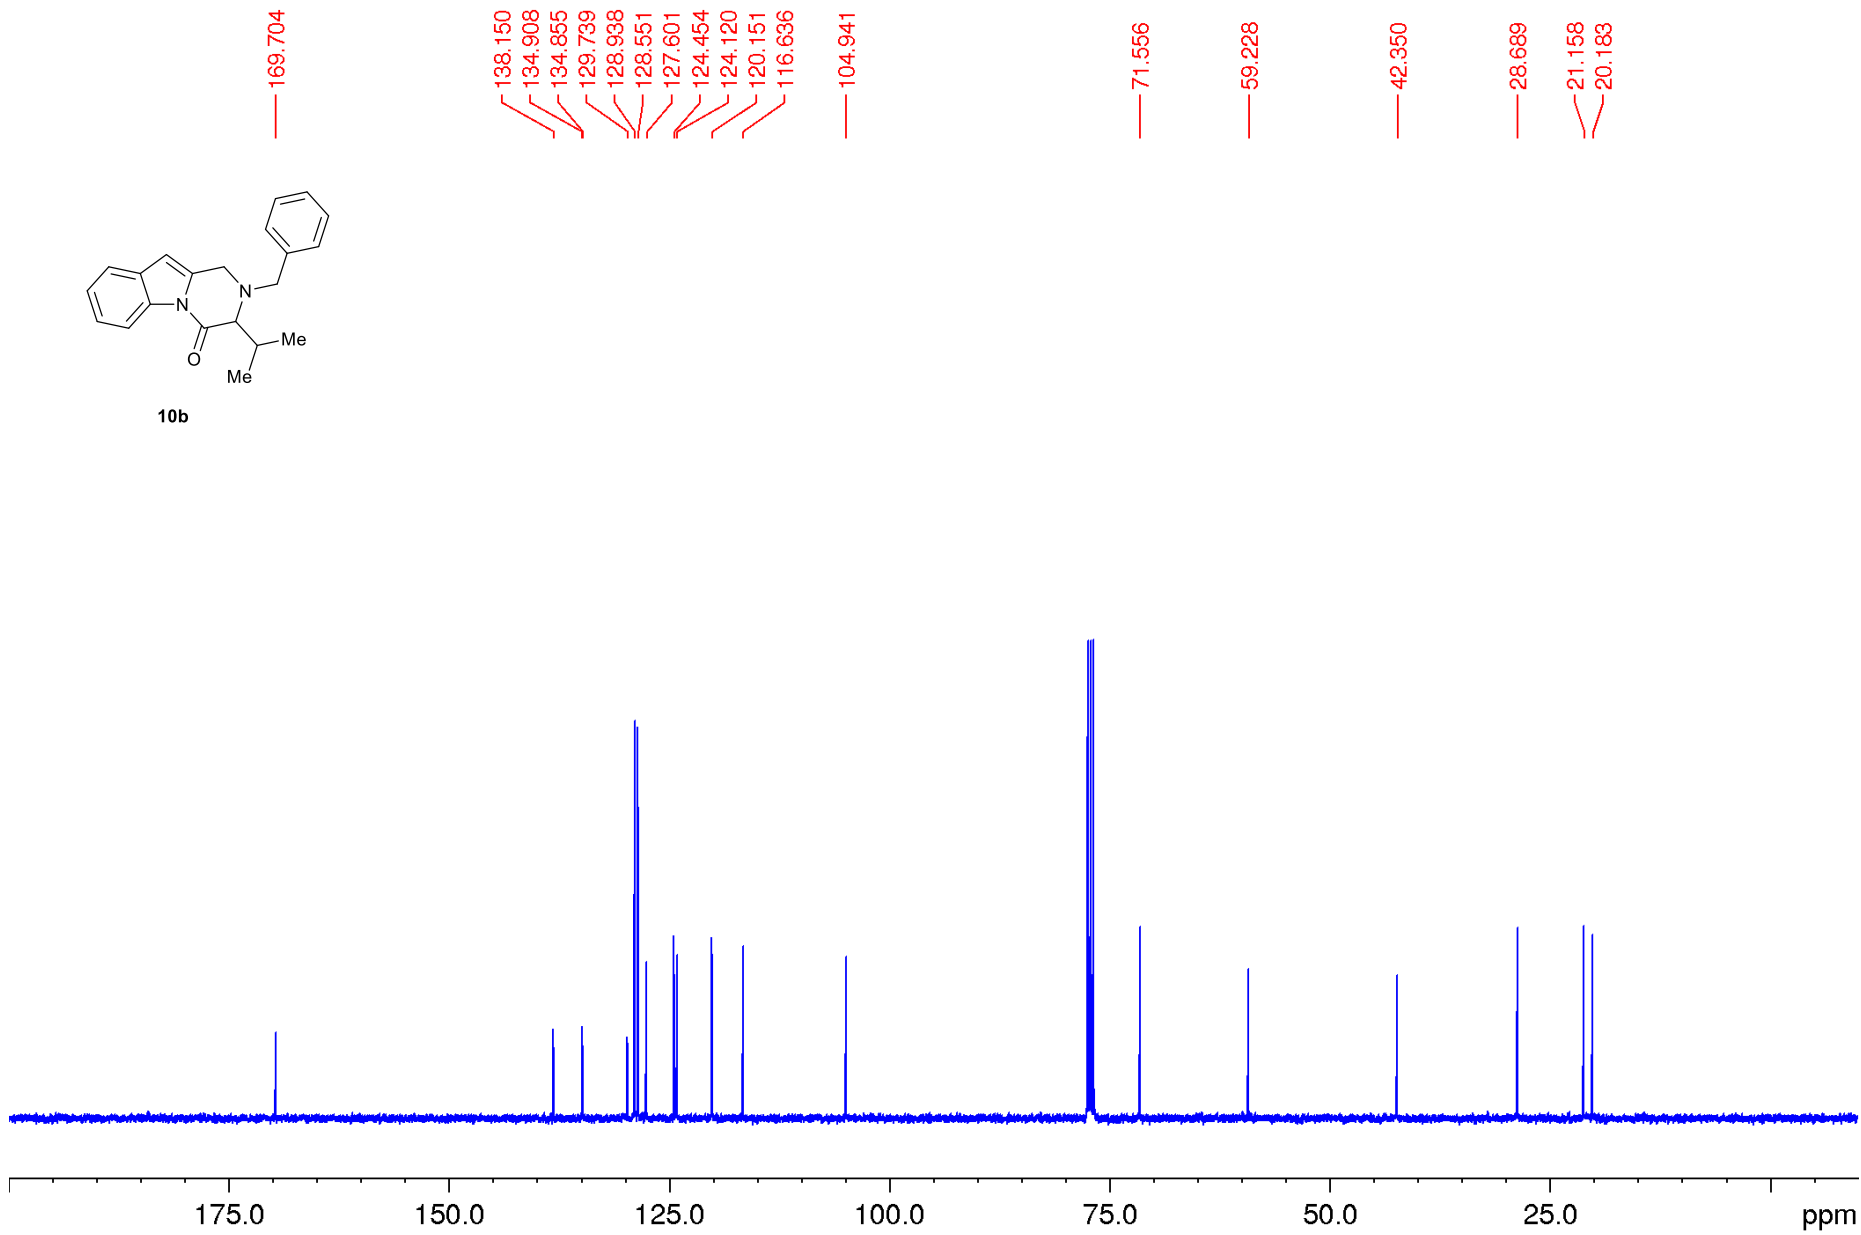



# DEPT 135 NMR-spectrum (CDCl<sub>3</sub>)

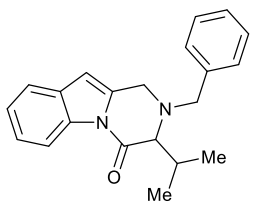

10b

128.949  
128.564  
127.615  
124.468  
124.136  
120.164  
116.648  
104.958  
71.567  
59.237  
42.353  
28.696  
21.171  
20.198

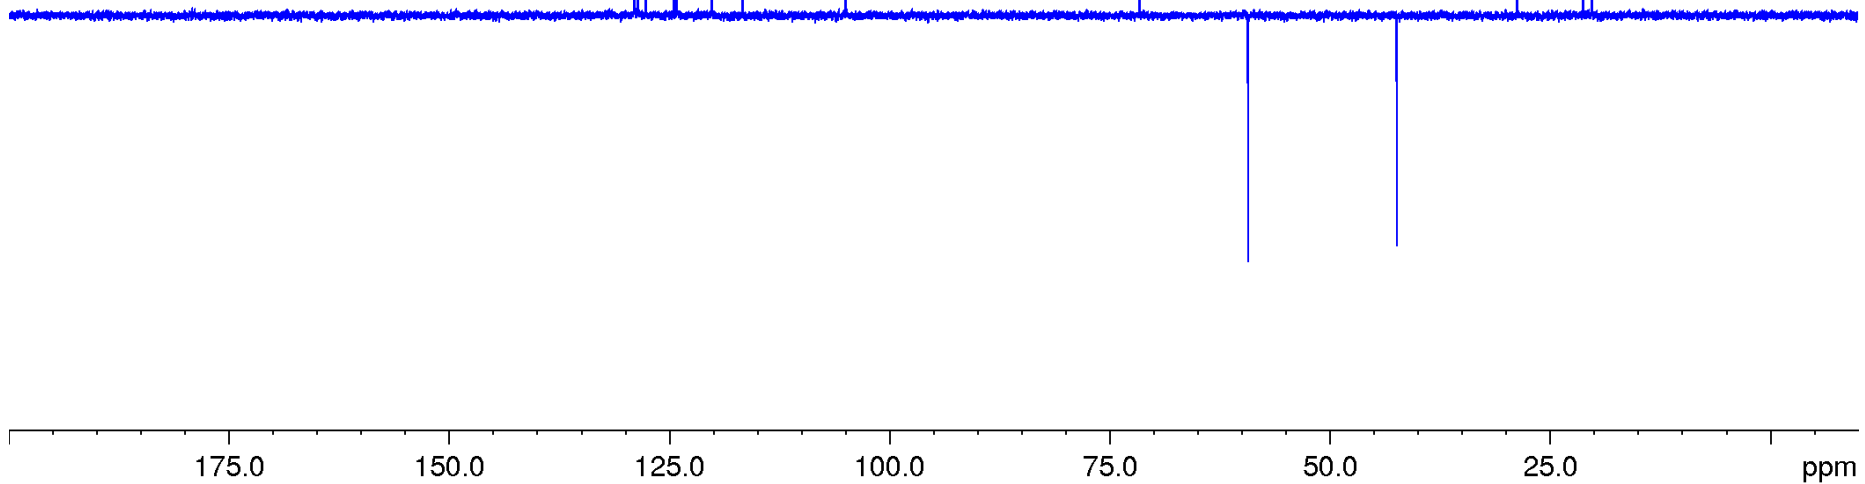

# <sup>1</sup>H NMR-spectrum (400.13 MHz) (CDCl<sub>3</sub>)

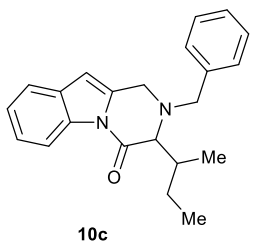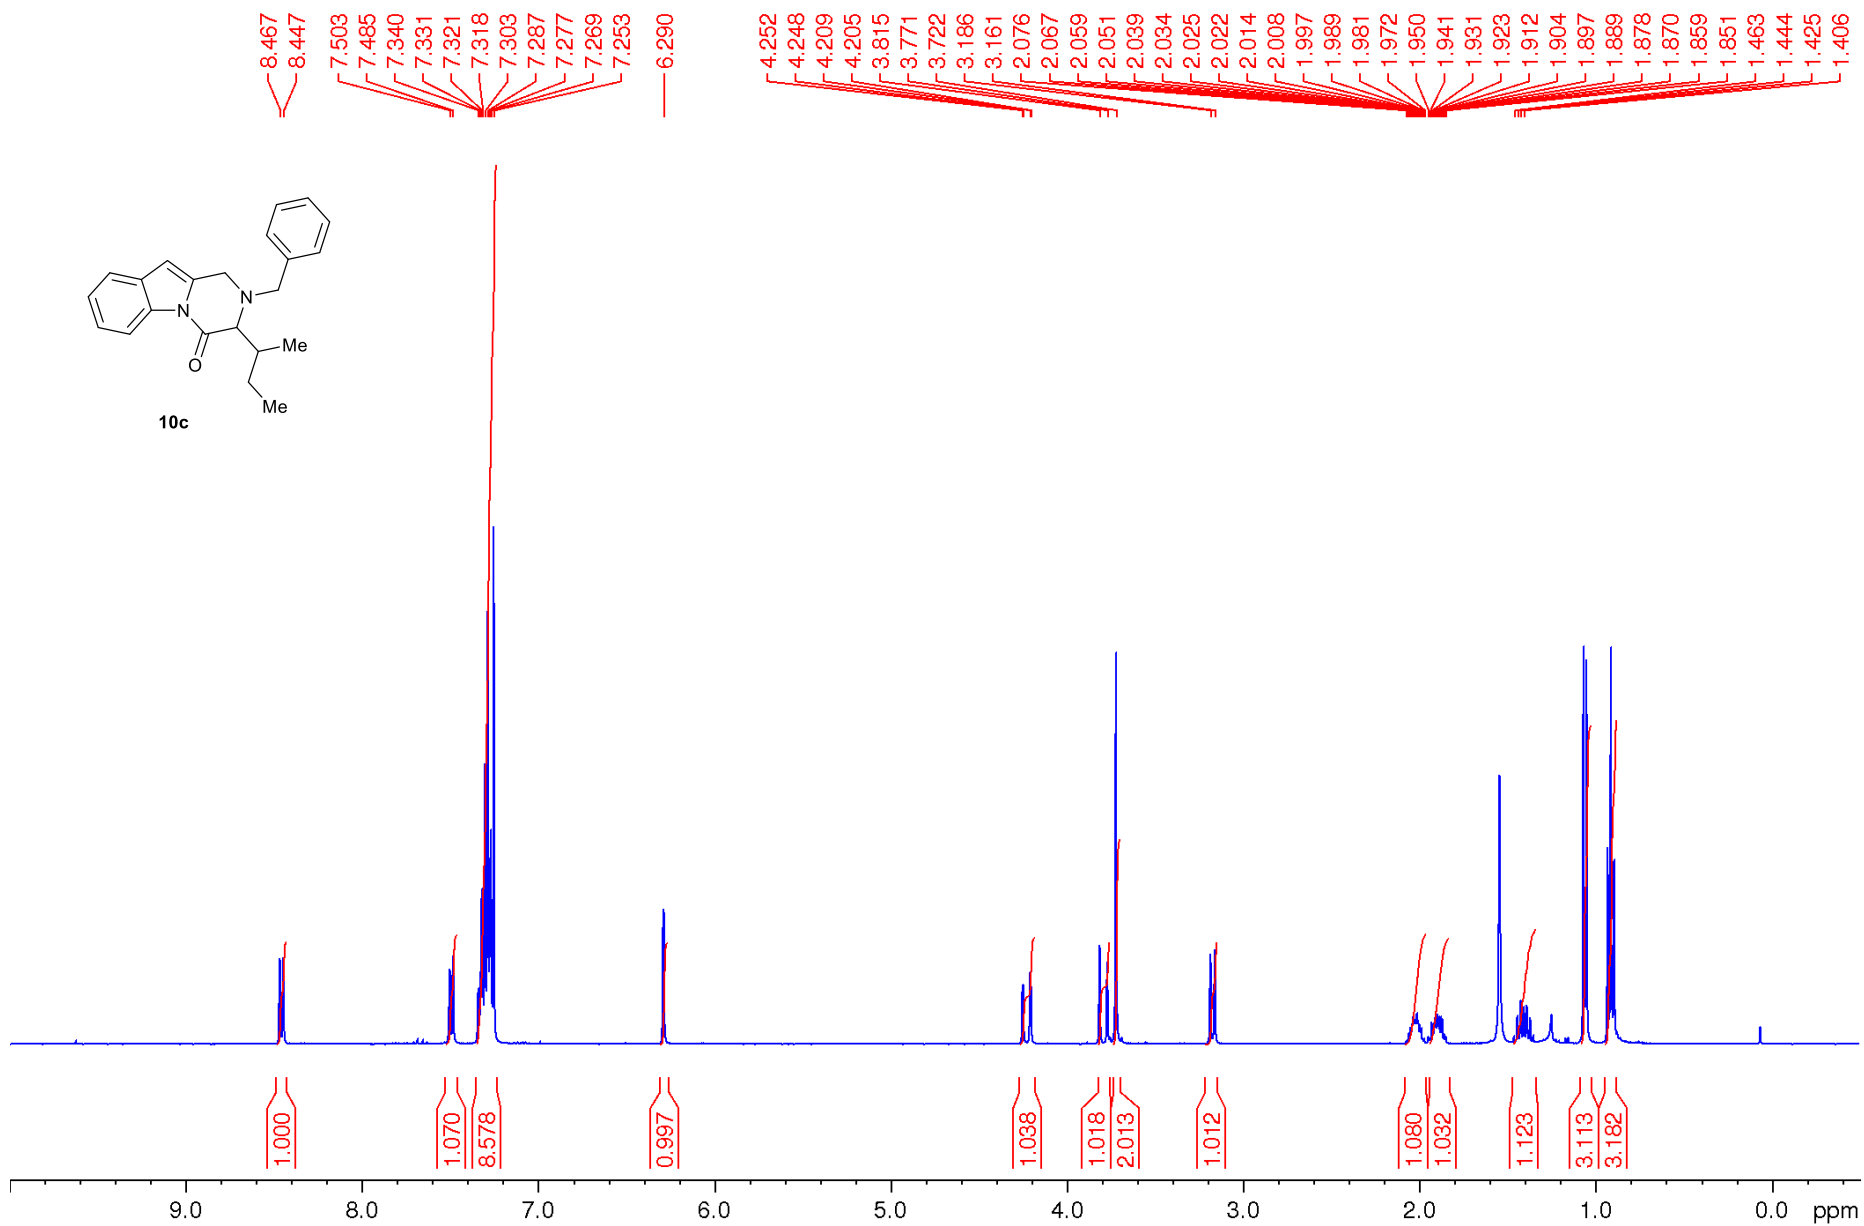

$^{13}\text{C}$  NMR-spectrum (100.6 MHz) ( $\text{CDCl}_3$ )

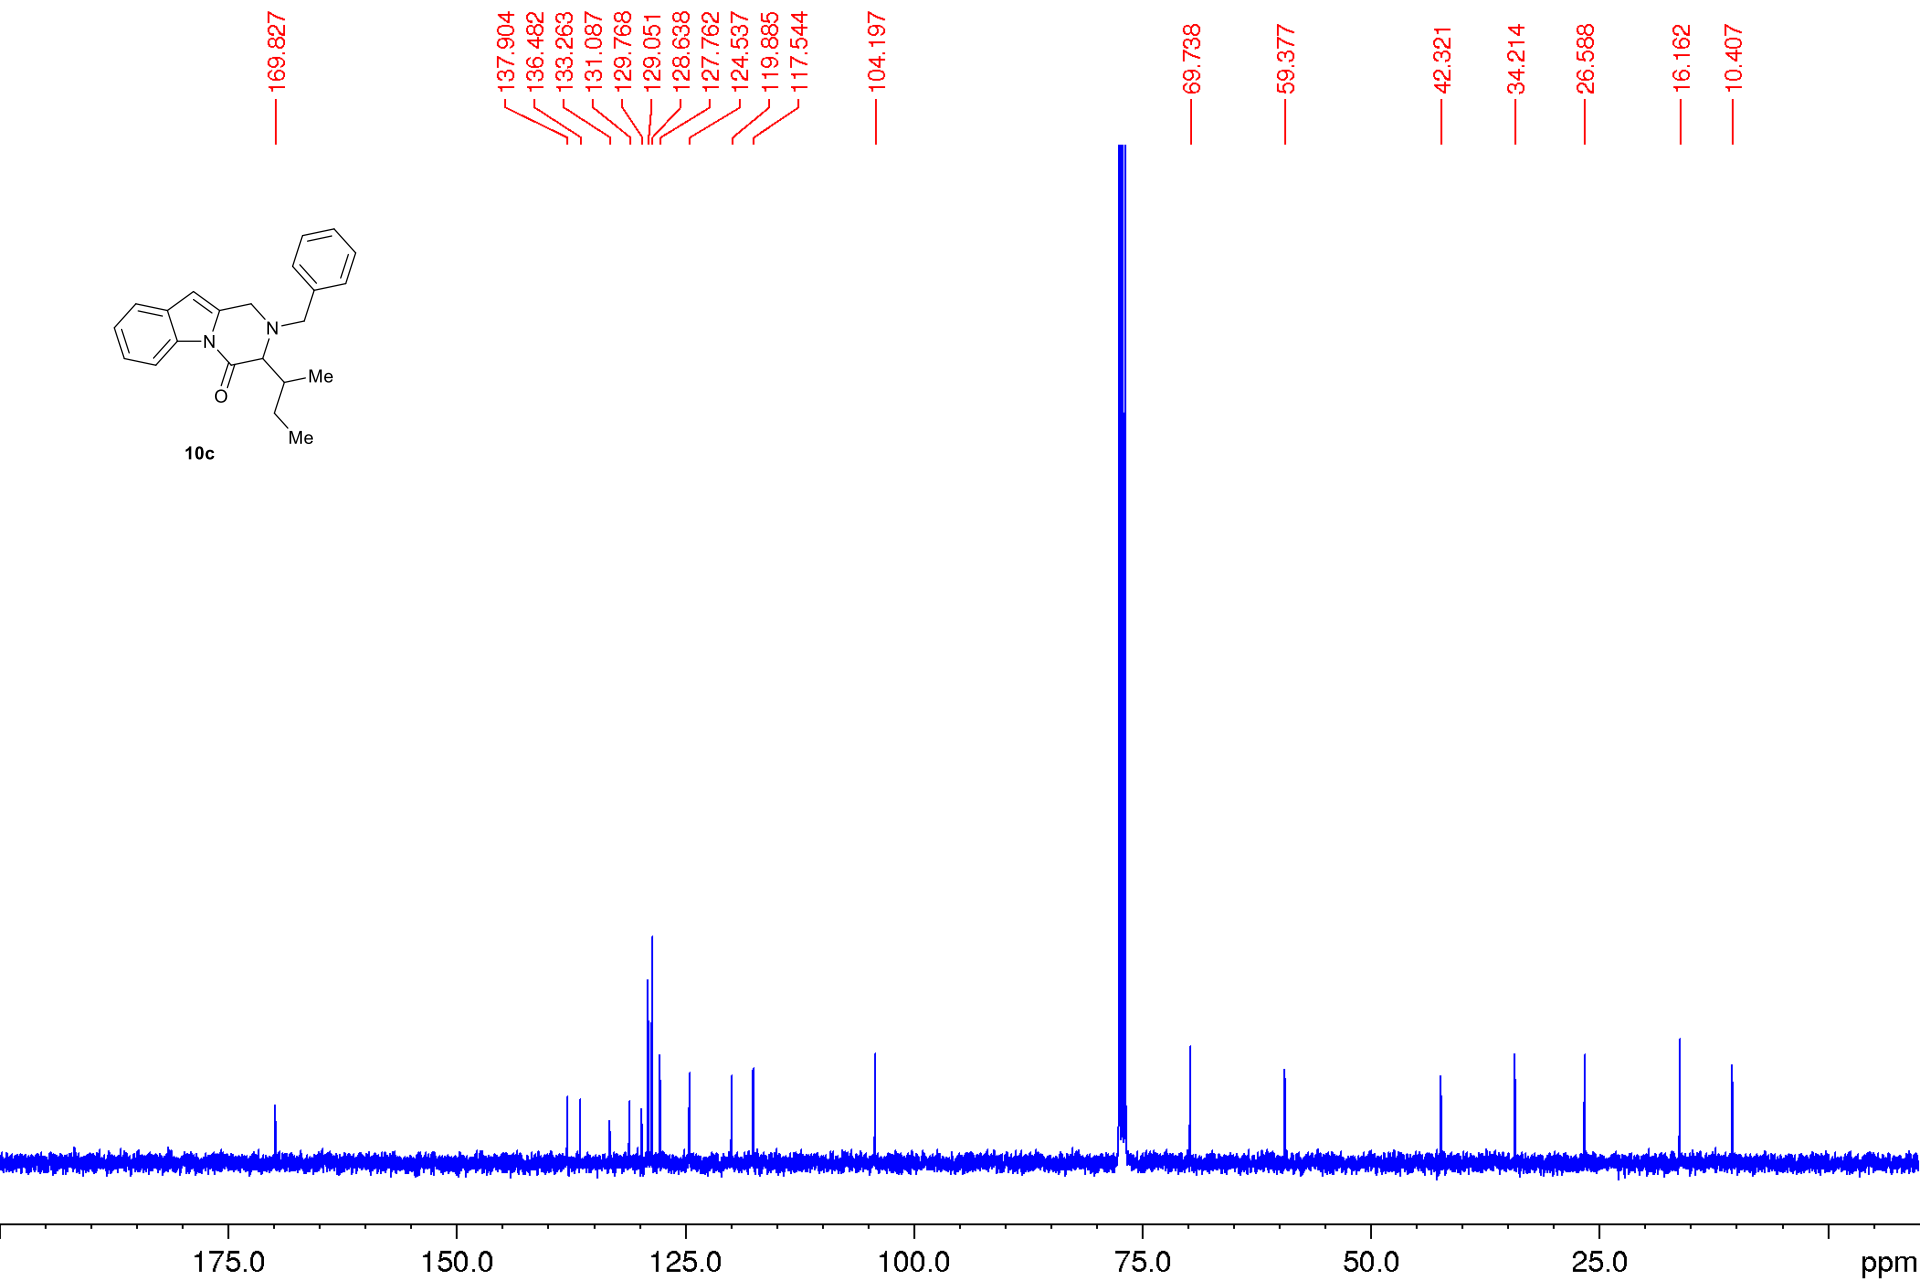

# DEPT 135 NMR-spectrum (CDCl<sub>3</sub>)



129.039  
128.626  
127.750  
124.524  
119.872  
117.532

104.187

69.727

42.308

34.202

26.576

16.151

10.396

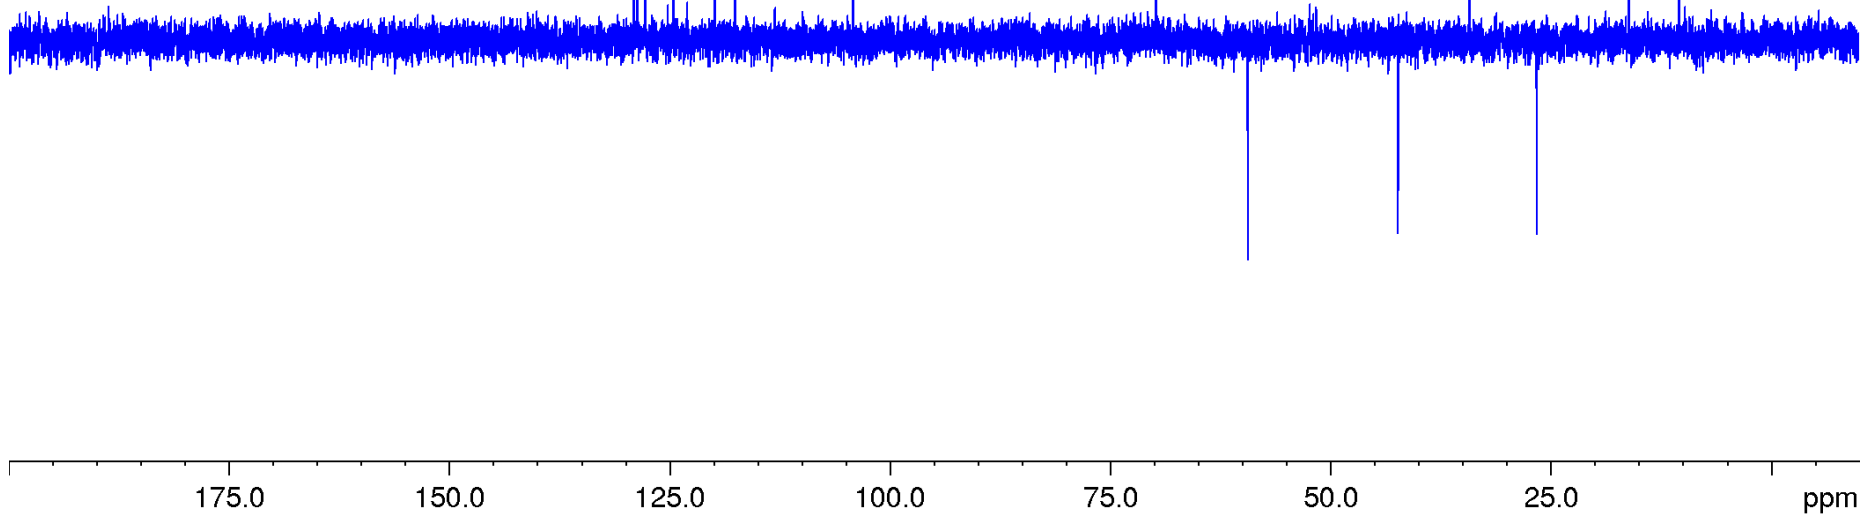

# $^1\text{H}$ NMR-spectrum (400.13 MHz) ( $\text{CDCl}_3$ )

8.382  
8.361  
7.468  
7.463  
7.351  
7.347  
7.334  
7.326  
7.322  
7.312  
7.296  
7.287  
7.270  
7.265  
7.262  
6.240

4.249  
4.245  
4.206  
4.202  
3.817  
3.774  
3.720  
3.193  
3.168  
2.077  
2.069  
2.060  
2.052  
2.040  
2.035  
2.027  
2.024  
2.015  
2.010  
2.008  
1.999  
1.990  
1.983  
1.974  
1.951  
1.943  
1.932  
1.924  
1.914  
1.905  
1.898  
1.890  
1.880  
1.871  
1.861  
1.853  
1.465  
1.446  
1.427

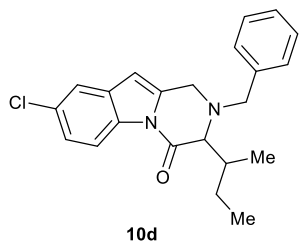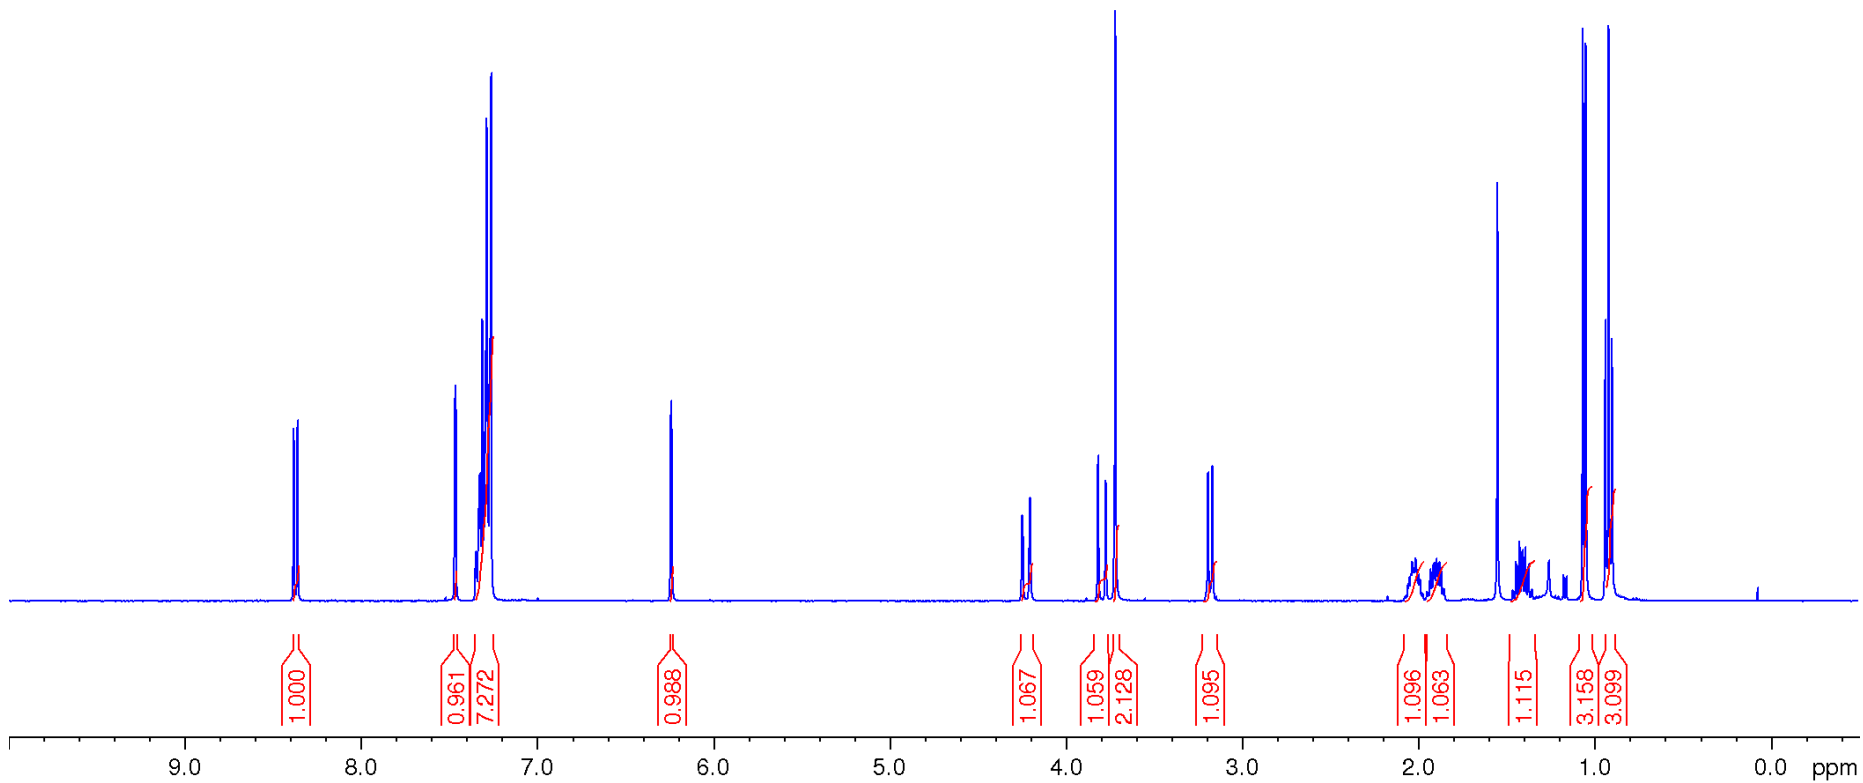

$^{13}\text{C}$  NMR-spectrum (100.6 MHz) ( $\text{CDCl}_3$ )

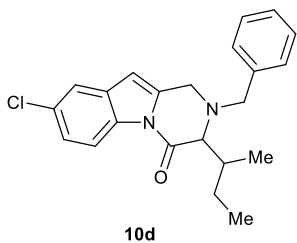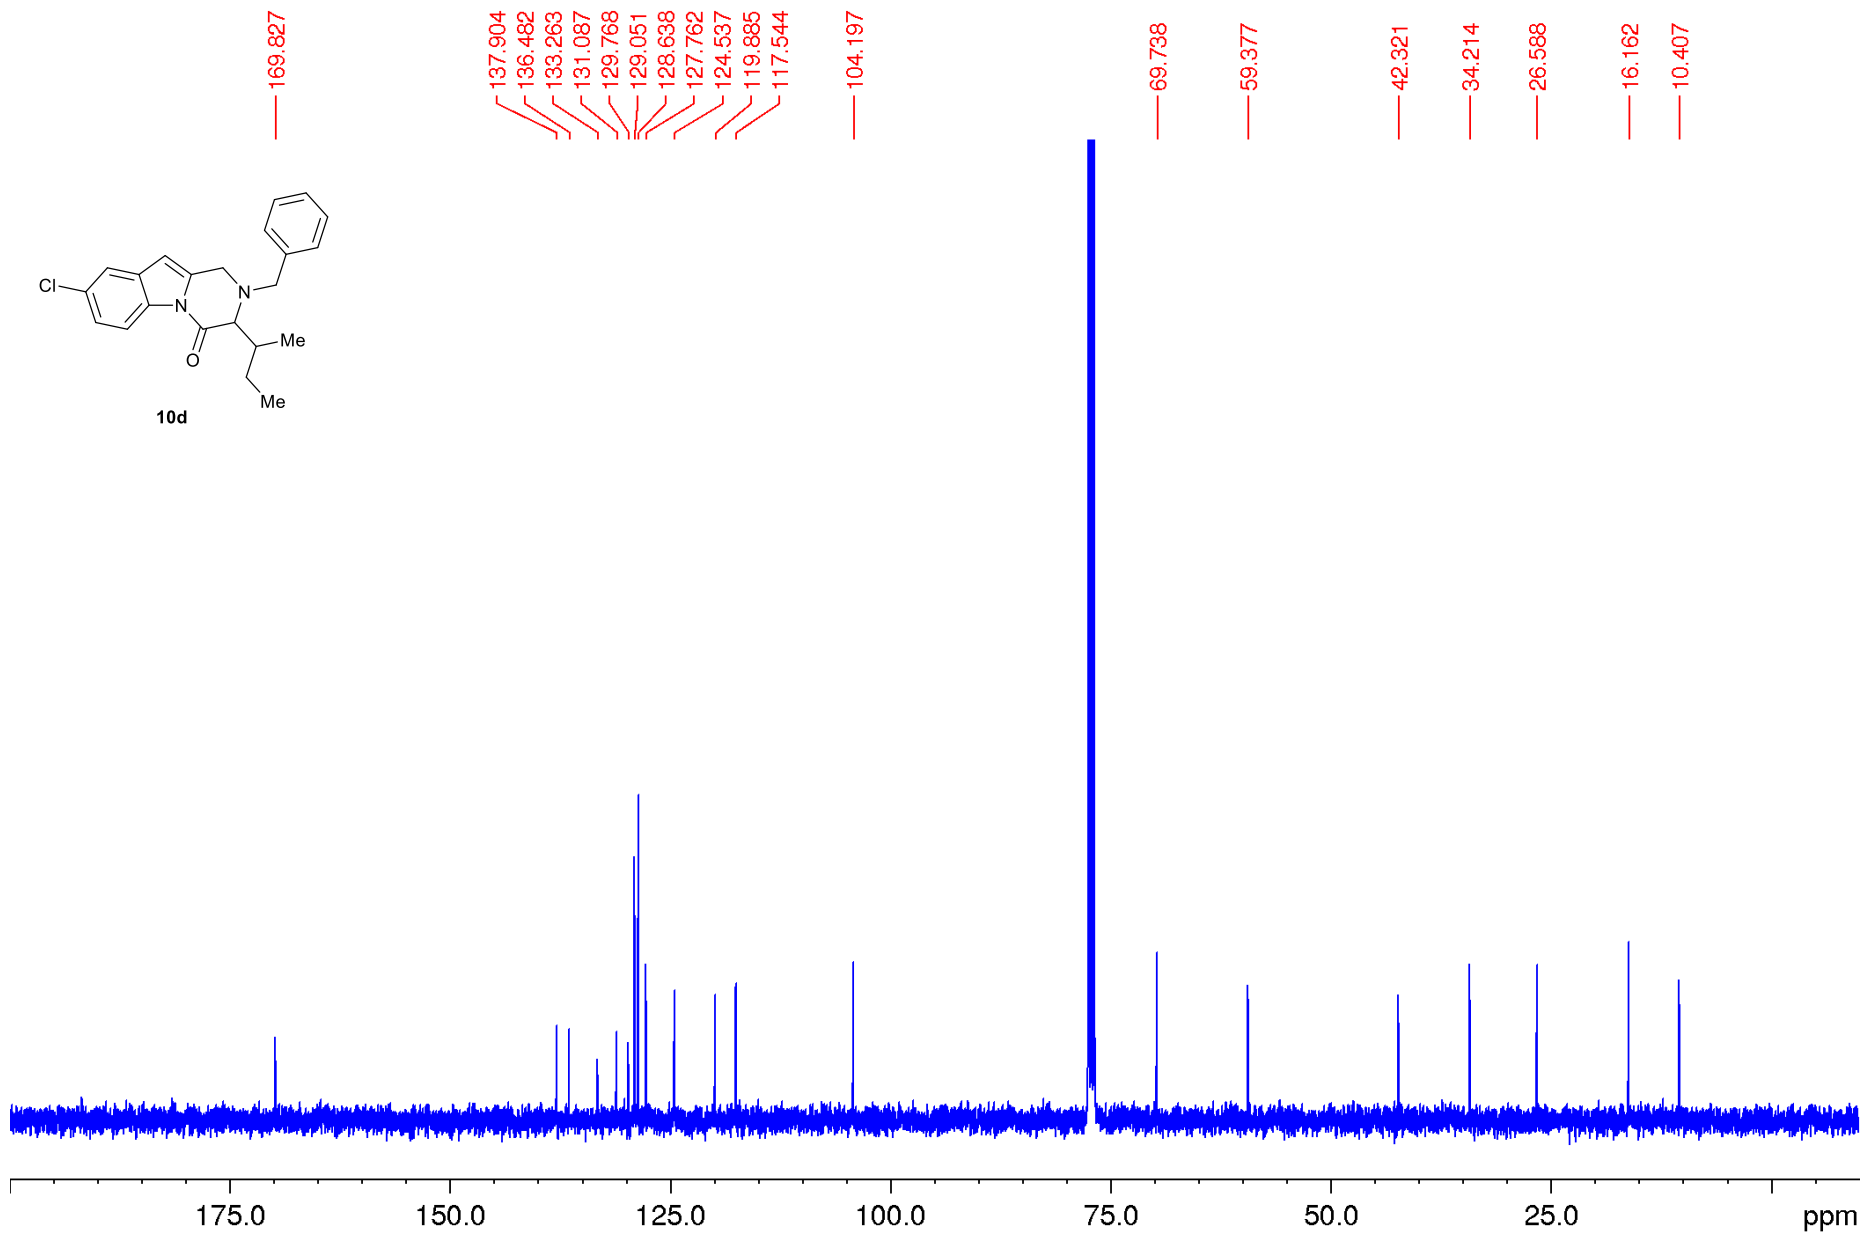

# DEPT 135 NMR-spectrum (CDCl<sub>3</sub>)



129.039  
128.626  
127.750  
124.524  
119.872  
117.532  
104.187  
69.727  
42.308  
34.202  
26.576  
16.151  
10.396

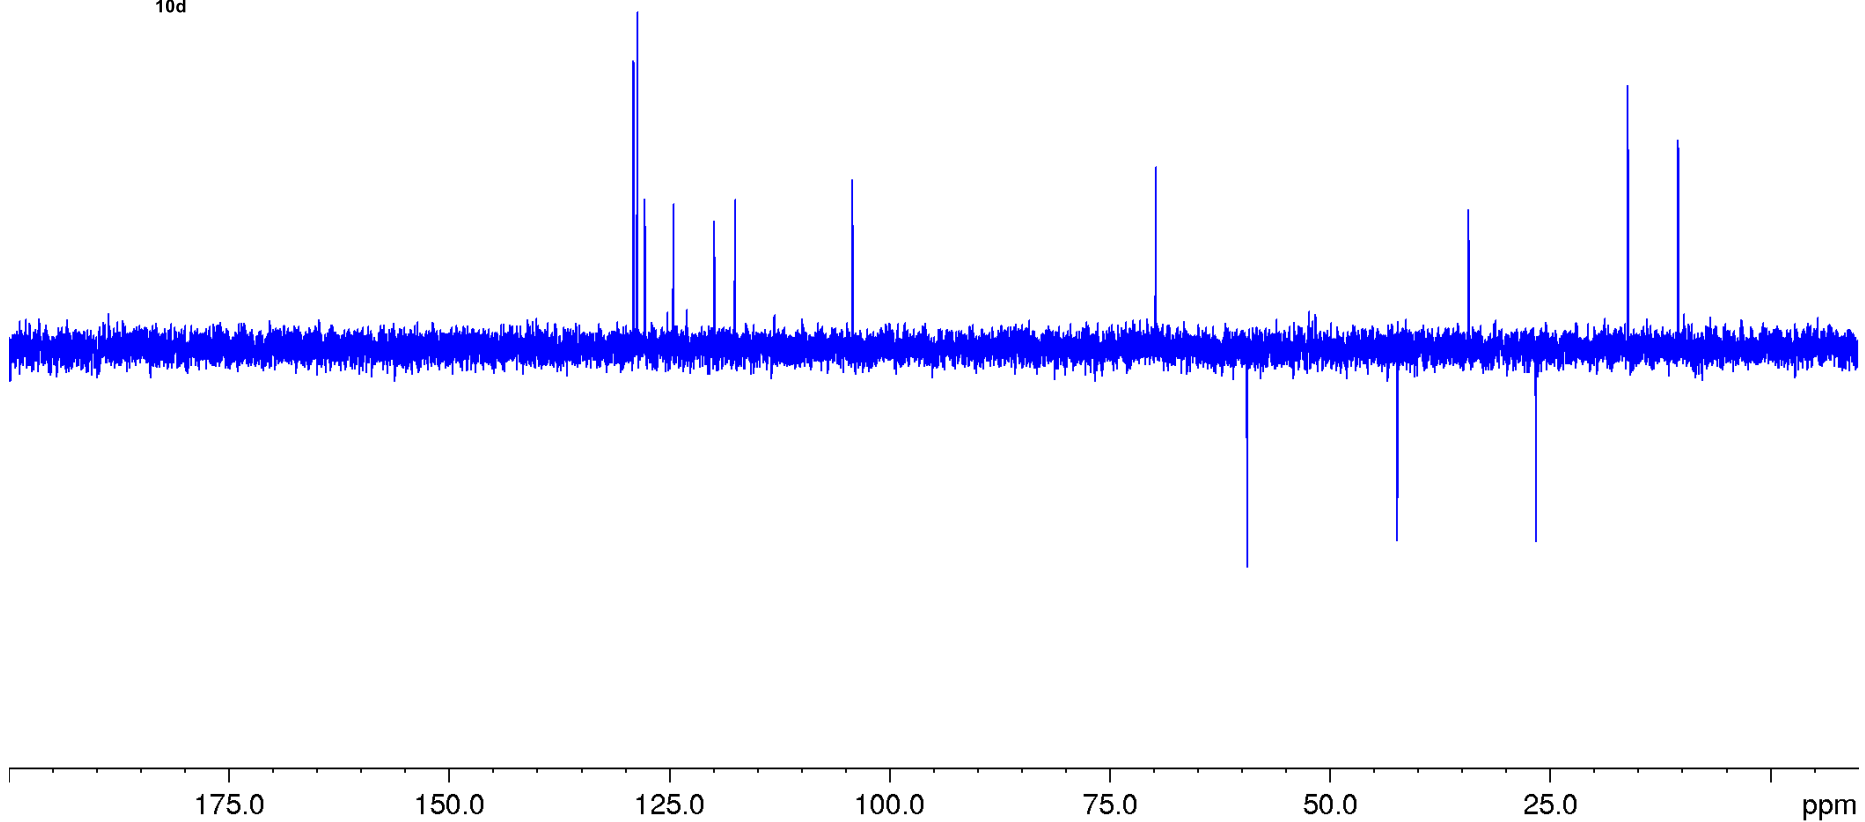

# <sup>1</sup>H NMR-spectrum (400.13 MHz) (CDCl<sub>3</sub>)

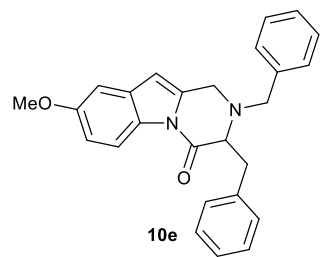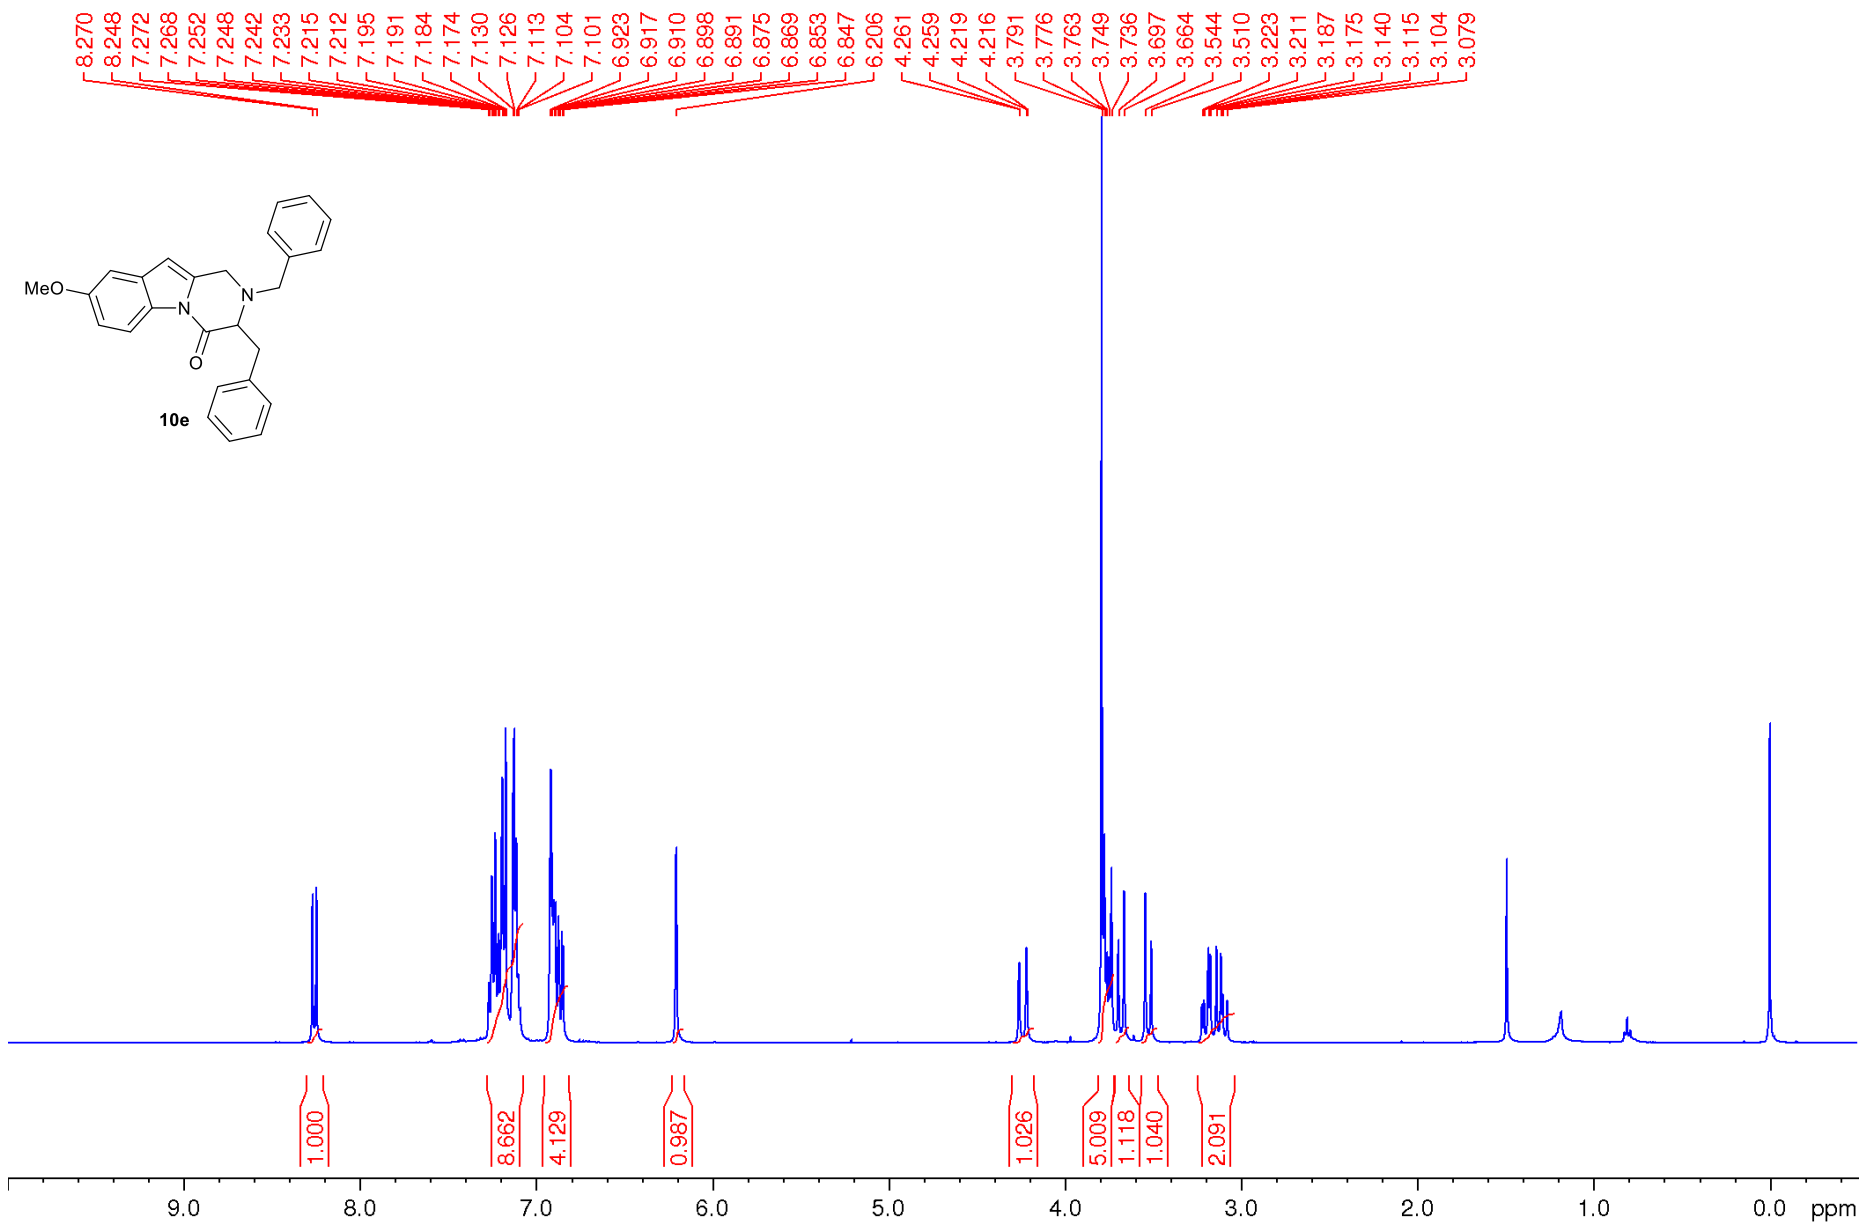



# $^{13}\text{C}$ NMR-spectrum (100.6 MHz) ( $\text{CDCl}_3$ )

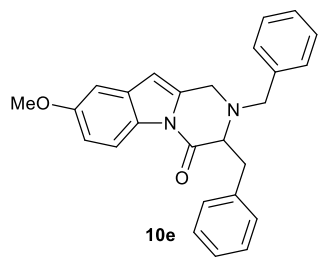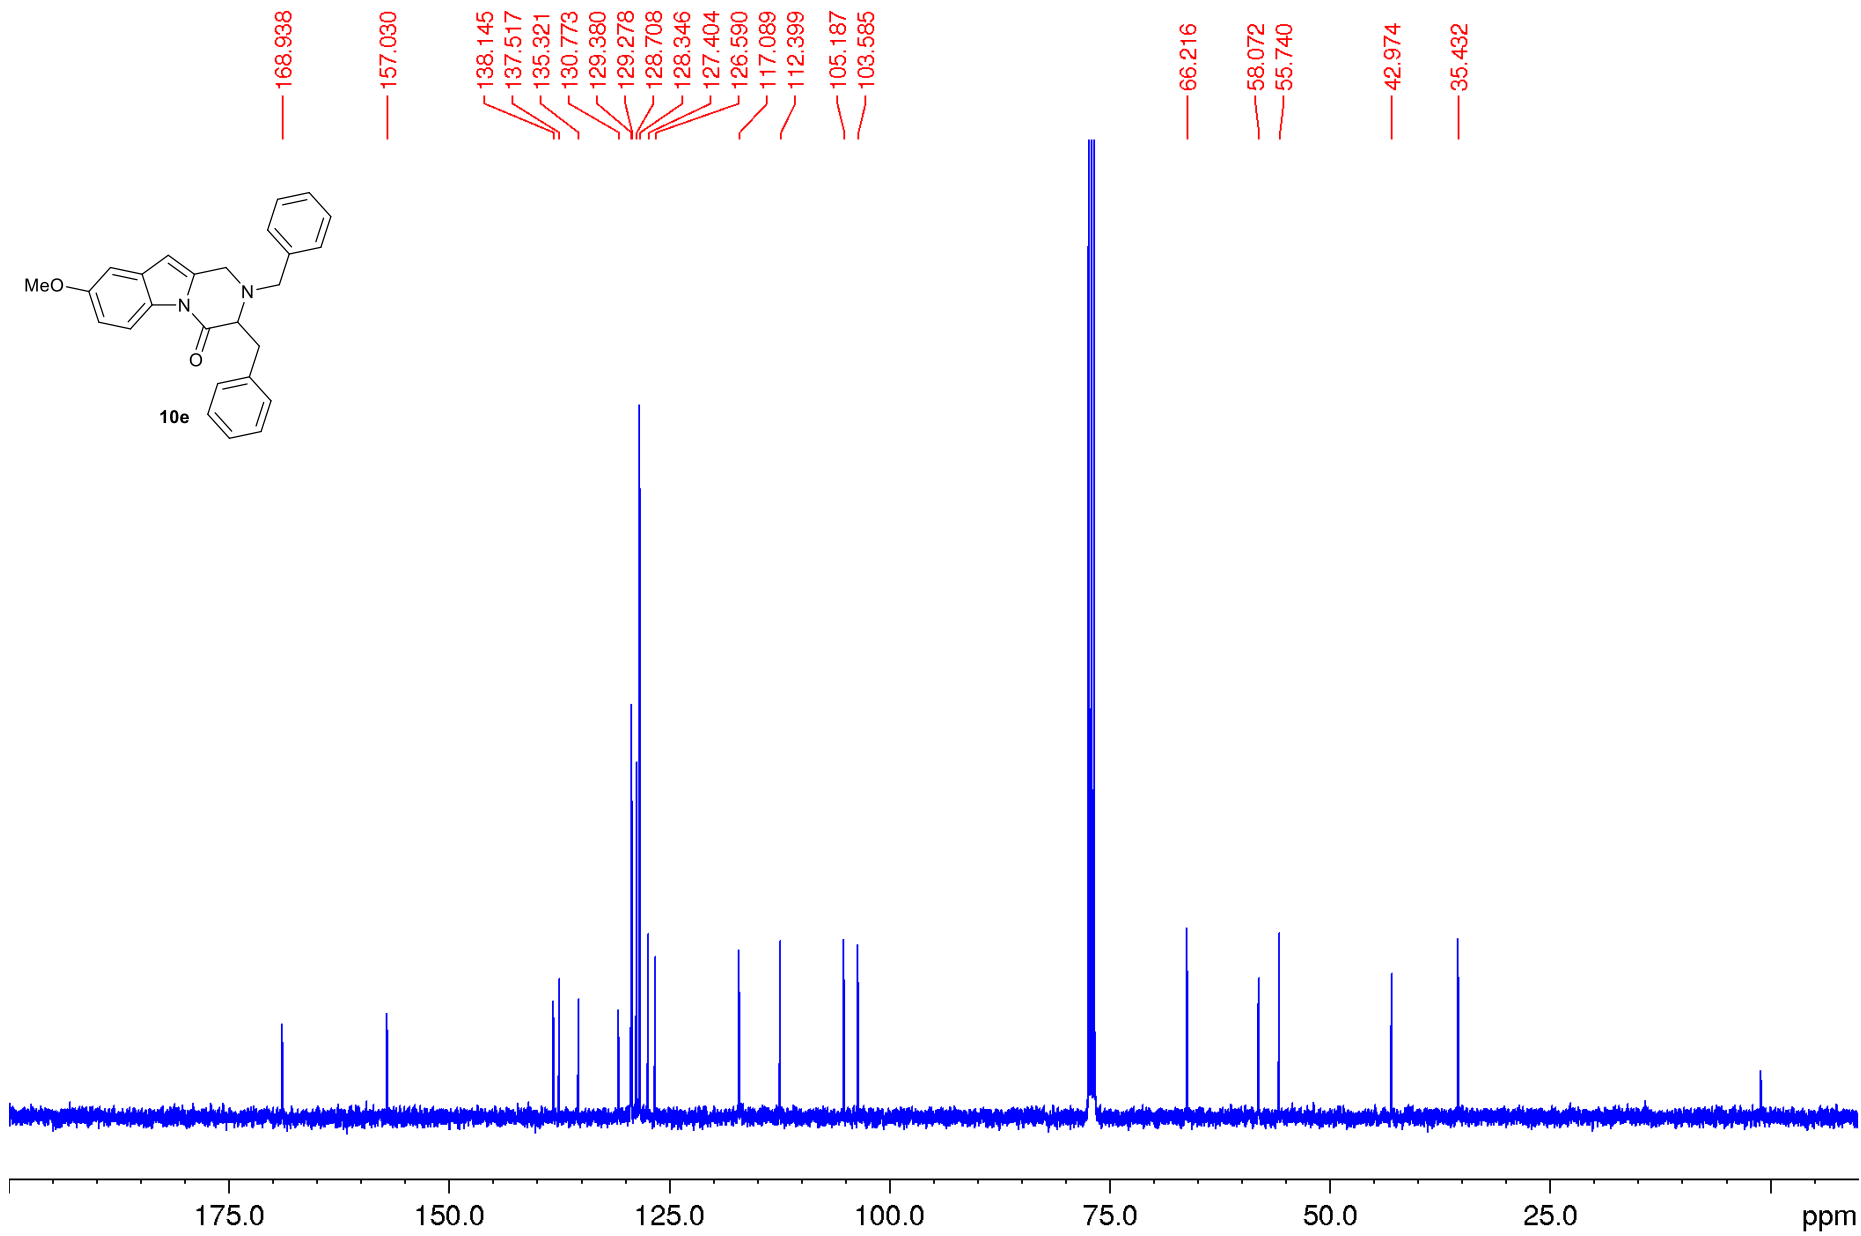

# DEPT 135 NMR-spectrum (CDCl<sub>3</sub>)

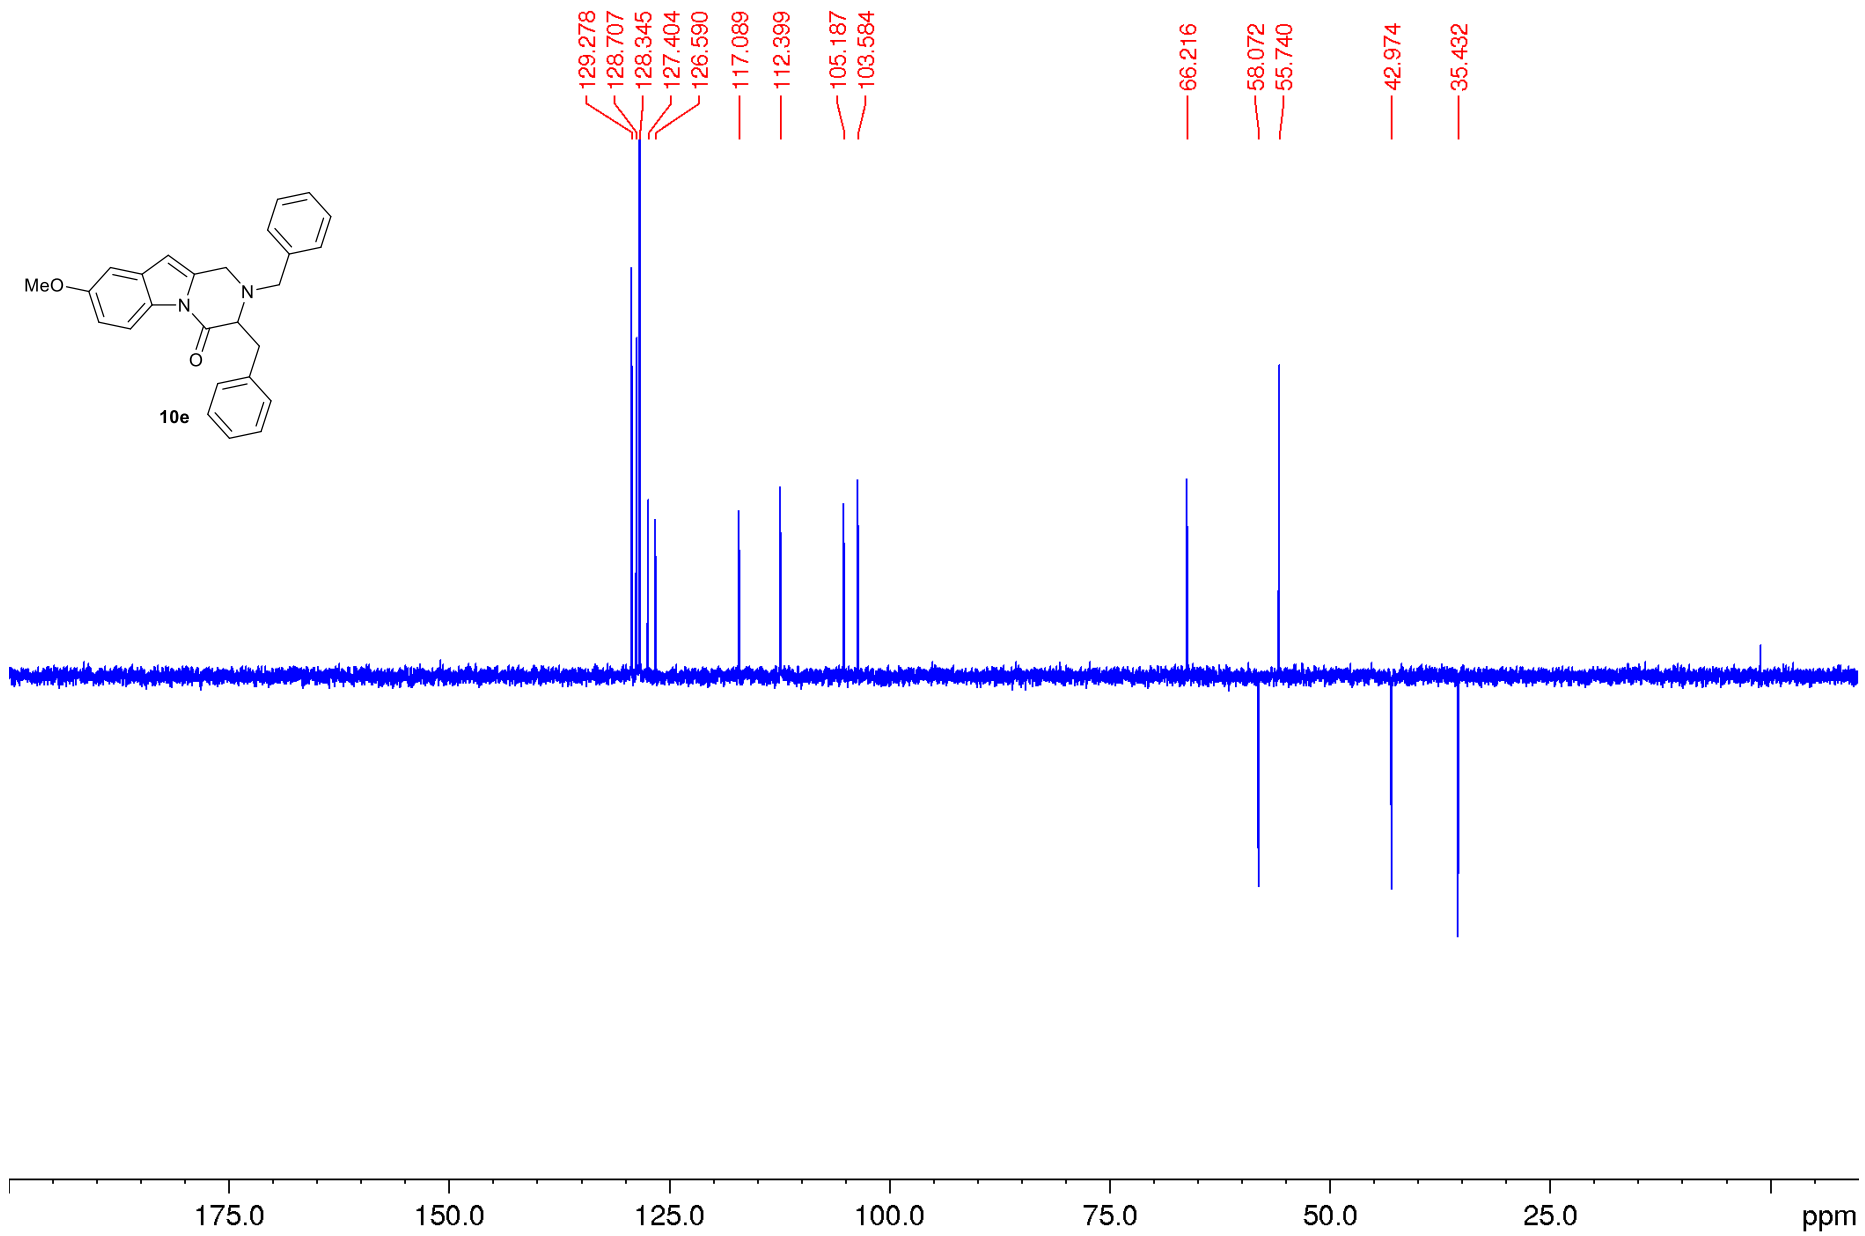

Supplement: RA-013-D3RA01335A-s001.pdf [file RA-013-D3RA01335A-s001.pdf]
