# Supplementary material for: Synthesis of 3-substituted 2,3-dihydropyrazino[1,2-a]indol-4(1H)-ones by sequential reactions of 2-indolylmethyl acetates with α-amino acids
Source: PubMed Central journal article supplement — RSC Adv. 2023 Mar 29;13(15):10090–6. doi: 10.1039/d3ra01335a (PMC10053697; doi:10.1039/d3ra01335a), 2023-03-29
Supplement: RA-013-D3RA01335A-s002.pdf [file RA-013-D3RA01335A-s002.pdf]

HF CALCULATION ON Ia and Ic

Job WF28131 started on DESKTOP-T7TL8TH at Thu Mar 09 16:30:51 2023  
Jaguar version 3.5, release 42

Job name: Ia  
Task: Geometry optimization

Stoichiometry: C9NH7  
Molecular weight: 129.06 amu  
Molecular charge: 0  
Spin multiplicity: 1  
Point Group: Cs

SCF method: RHF  
Basis set: 6-31G\*\*  
Basis functions: 185

Total electrons: 68  
Alpha electrons: 34  
Beta electrons: 34  
Total orbitals: 185  
Core orbitals: 34  
Open-shell orbitals: 0  
Occupied orbitals: 34  
Shells: 1

Non-default options chosen:

Geometry will be optimized in redundant internal coordinates  
Initial Hessian: from previous calculation

WARNING: Hessian has too many zero eigenvalues  
Some coordinates may be inadvertently frozen

| Iter                                                                                           | Energy        | Gmax      | Grms      | Dmax      | Drms      |
|------------------------------------------------------------------------------------------------|---------------|-----------|-----------|-----------|-----------|
| 1                                                                                              | -399.285542 * | 0.05414 . | 0.01394 . | 0.06946 . | 0.02646 . |
| WARNING: Hessian has too many zero eigenvalues<br>Some coordinates may be inadvertently frozen |               |           |           |           |           |
| 2                                                                                              | -399.295677 . | 0.01196 . | 0.00388 . | 0.02854 . | 0.00917 . |
| WARNING: Hessian has too many zero eigenvalues<br>Some coordinates may be inadvertently frozen |               |           |           |           |           |
| 3                                                                                              | -399.296460 . | 0.00681 . | 0.00159 . | 0.01376 . | 0.00375 . |
| WARNING: Hessian has too many zero eigenvalues<br>Some coordinates may be inadvertently frozen |               |           |           |           |           |
| 4                                                                                              | -399.296540 . | 0.00214 . | 0.00058 . | 0.00379 . | 0.00122 . |
| WARNING: Hessian has too many zero eigenvalues<br>Some coordinates may be inadvertently frozen |               |           |           |           |           |
| 5                                                                                              | -399.296559 * | 0.00039 * | 0.00011 * | 0.00079 * | 0.00033 * |

\*\*\*\*\*

\*\* Geometry optimization complete \*\*  
\*\*\*\*\*

Final energy ..... -399.29655875068

Job WF28131 completed on DESKTOP-T7TL8TH at Thu Mar 09 16:31:58 2023

Wall Time: 000:01:07

CPU Time: 000:00:00

TITAN Properties Program: (PC/x86)

Release 6.0.2

Closed-Shell Molecular Orbital Coefficients

| MO:          |        | 1          | 2          | 3          | 4          | 5          |
|--------------|--------|------------|------------|------------|------------|------------|
| Eigenvalues: |        | -15.53909  | -11.27106  | -11.26094  | -11.24910  | -11.24814  |
| (ev):        |        | -422.84044 | -306.70126 | -306.42581 | -306.10379 | -306.07750 |
|              |        | A          | A          | A          | A          | A          |
| 1            | H1 S   | -0.00005   | -0.00006   | 0.00008    | 0.00000    | -0.00006   |
| 2            | H1 S   | -0.00035   | -0.00056   | 0.00066    | 0.00003    | -0.00076   |
| 3            | H1 PX  | 0.00000    | 0.00000    | -0.00001   | 0.00000    | 0.00000    |
| 4            | H1 PY  | 0.00000    | 0.00004    | -0.00002   | 0.00000    | -0.00002   |
| 5            | H1 PZ  | 0.00000    | 0.00000    | 0.00000    | 0.00000    | 0.00000    |
| 6            | C1 S   | 0.00002    | 0.00077    | -0.00006   | 0.00007    | -0.00833   |
| 7            | C1 S   | 0.00010    | 0.00030    | -0.00015   | -0.00005   | 0.00015    |
| 8            | C1 PX  | -0.00003   | -0.00010   | 0.00005    | 0.00000    | -0.00005   |
| 9            | C1 PY  | -0.00001   | -0.00004   | 0.00003    | 0.00000    | 0.00003    |
| 10           | C1 PZ  | 0.00000    | 0.00000    | 0.00000    | 0.00000    | 0.00000    |
| 11           | C1 S   | -0.00114   | -0.00198   | 0.00172    | 0.00041    | -0.00364   |
| 12           | C1 PX  | 0.00106    | 0.00145    | -0.00190   | -0.00019   | 0.00231    |
| 13           | C1 PY  | -0.00015   | 0.00003    | 0.00072    | -0.00010   | 0.00025    |
| 14           | C1 PZ  | 0.00000    | 0.00000    | 0.00000    | 0.00000    | 0.00000    |
| 15           | C1 DXX | 0.00000    | -0.00004   | -0.00001   | -0.00001   | -0.00006   |
| 16           | C1 DYY | 0.00002    | -0.00006   | -0.00006   | 0.00001    | -0.00009   |
| 17           | C1 DZZ | 0.00005    | 0.00013    | -0.00007   | -0.00002   | 0.00015    |
| 18           | C1 DXY | 0.00000    | 0.00000    | -0.00001   | 0.00000    | 0.00004    |
| 19           | C1 DXZ | 0.00000    | 0.00000    | 0.00000    | 0.00000    | 0.00000    |
| 20           | C1 DYZ | 0.00000    | 0.00000    | 0.00000    | 0.00000    | 0.00000    |
| 21           | C2 S   | -0.00002   | -0.01105   | 0.00015    | 0.00003    | -0.05698   |
| 22           | C2 S   | -0.00004   | -0.00053   | 0.00013    | 0.00000    | -0.00147   |
| 23           | C2 PX  | 0.00000    | 0.00014    | 0.00001    | 0.00001    | 0.00008    |
| 24           | C2 PY  | 0.00005    | -0.00005   | -0.00007   | -0.00002   | 0.00013    |
| 25           | C2 PZ  | 0.00000    | 0.00000    | 0.00000    | 0.00000    | 0.00000    |
| 26           | C2 S   | 0.00041    | -0.00160   | -0.00068   | -0.00003   | -0.00082   |
| 27           | C2 PX  | 0.00003    | -0.00109   | -0.00103   | -0.00013   | 0.00037    |
| 28           | C2 PY  | -0.00076   | -0.00088   | -0.00039   | -0.00020   | -0.00124   |
| 29           | C2 PZ  | 0.00000    | 0.00000    | 0.00000    | 0.00000    | 0.00000    |
| 30           | C2 DXX | -0.00013   | 0.00042    | 0.00001    | 0.00000    | 0.00051    |
| 31           | C2 DYY | 0.00002    | 0.00066    | 0.00002    | 0.00002    | 0.00046    |
| 32           | C2 DZZ | -0.00002   | 0.00010    | 0.00006    | 0.00001    | 0.00016    |
| 33           | C2 DXY | 0.00003    | -0.00022   | 0.00004    | -0.00001   | -0.00004   |

|    |    |     |          |          |          |          |          |
|----|----|-----|----------|----------|----------|----------|----------|
| 34 | C2 | DXZ | 0.00000  | 0.00000  | 0.00000  | 0.00000  | 0.00000  |
| 35 | C2 | DYZ | 0.00000  | 0.00000  | 0.00000  | 0.00000  | 0.00000  |
| 36 | C3 | S   | -0.00001 | -0.01158 | 0.00000  | 0.00041  | 0.00038  |
| 37 | C3 | S   | 0.00003  | -0.00025 | 0.00010  | 0.00007  | 0.00000  |
| 38 | C3 | PX  | -0.00004 | -0.00006 | -0.00006 | 0.00002  | -0.00001 |
| 39 | C3 | PY  | -0.00002 | 0.00000  | -0.00003 | 0.00004  | -0.00004 |
| 40 | C3 | PZ  | 0.00000  | 0.00000  | 0.00000  | 0.00000  | 0.00000  |
| 41 | C3 | S   | 0.00002  | -0.00764 | -0.00269 | -0.00153 | -0.00001 |
| 42 | C3 | PX  | -0.00080 | 0.00282  | 0.00300  | -0.00004 | -0.00020 |
| 43 | C3 | PY  | 0.00101  | 0.00218  | -0.00071 | 0.00043  | 0.00387  |
| 44 | C3 | PZ  | 0.00000  | 0.00000  | 0.00000  | 0.00000  | 0.00000  |
| 45 | C3 | DXX | 0.00000  | 0.00056  | -0.00004 | 0.00000  | 0.00003  |
| 46 | C3 | DYY | -0.00007 | 0.00028  | 0.00021  | -0.00004 | 0.00002  |
| 47 | C3 | DZZ | 0.00001  | 0.00019  | 0.00008  | 0.00000  | 0.00002  |
| 48 | C3 | DXY | 0.00002  | 0.00013  | 0.00000  | -0.00001 | 0.00002  |
| 49 | C3 | DXZ | 0.00000  | 0.00000  | 0.00000  | 0.00000  | 0.00000  |
| 50 | C3 | DYZ | 0.00000  | 0.00000  | 0.00000  | 0.00000  | 0.00000  |
| 51 | C4 | S   | -0.00001 | 0.00013  | 0.00007  | -0.00001 | -0.07202 |
| 52 | C4 | S   | -0.00005 | -0.00011 | 0.00012  | 0.00004  | -0.00224 |
| 53 | C4 | PX  | 0.00000  | -0.00004 | 0.00000  | -0.00001 | -0.00005 |
| 54 | C4 | PY  | -0.00002 | -0.00006 | 0.00002  | -0.00001 | -0.00001 |
| 55 | C4 | PZ  | 0.00000  | 0.00000  | 0.00000  | 0.00000  | 0.00000  |
| 56 | C4 | S   | 0.00141  | 0.00238  | -0.00255 | -0.00032 | -0.00020 |
| 57 | C4 | PX  | -0.00027 | -0.00057 | 0.00021  | 0.00013  | 0.00083  |
| 58 | C4 | PY  | -0.00054 | -0.00101 | 0.00133  | 0.00027  | -0.00116 |
| 59 | C4 | PZ  | 0.00000  | 0.00000  | 0.00000  | 0.00000  | 0.00000  |
| 60 | C4 | DXX | 0.00001  | 0.00005  | 0.00000  | 0.00000  | 0.00081  |
| 61 | C4 | DYY | 0.00000  | 0.00004  | 0.00000  | 0.00000  | 0.00041  |
| 62 | C4 | DZZ | -0.00001 | -0.00001 | 0.00004  | 0.00002  | 0.00024  |
| 63 | C4 | DXY | 0.00000  | 0.00001  | 0.00000  | 0.00000  | -0.00005 |
| 64 | C4 | DXZ | 0.00000  | 0.00000  | 0.00000  | 0.00000  | 0.00000  |
| 65 | C4 | DYZ | 0.00000  | 0.00000  | 0.00000  | 0.00000  | 0.00000  |
| 66 | C5 | S   | 0.00002  | 0.00143  | -0.00011 | -0.00046 | -0.99130 |
| 67 | C5 | S   | 0.00007  | 0.00043  | -0.00016 | -0.00003 | -0.02725 |
| 68 | C5 | PX  | 0.00002  | 0.00006  | -0.00001 | 0.00001  | -0.00015 |
| 69 | C5 | PY  | -0.00004 | -0.00013 | 0.00005  | 0.00000  | 0.00002  |
| 70 | C5 | PZ  | 0.00000  | 0.00000  | 0.00000  | 0.00000  | 0.00000  |
| 71 | C5 | S   | -0.00031 | -0.00039 | 0.00178  | 0.00037  | 0.00998  |
| 72 | C5 | PX  | -0.00073 | -0.00156 | 0.00062  | 0.00005  | 0.00014  |
| 73 | C5 | PY  | 0.00039  | 0.00106  | -0.00122 | -0.00018 | -0.00005 |
| 74 | C5 | PZ  | 0.00000  | 0.00000  | 0.00000  | 0.00000  | 0.00000  |
| 75 | C5 | DXX | 0.00000  | -0.00005 | -0.00001 | 0.00000  | 0.00165  |
| 76 | C5 | DYY | 0.00003  | -0.00013 | -0.00002 | 0.00000  | 0.00146  |
| 77 | C5 | DZZ | 0.00005  | 0.00015  | -0.00007 | -0.00001 | 0.00245  |
| 78 | C5 | DXY | -0.00001 | -0.00002 | -0.00001 | 0.00000  | -0.00014 |
| 79 | C5 | DXZ | 0.00000  | 0.00000  | 0.00000  | 0.00000  | 0.00000  |
| 80 | C5 | DYZ | 0.00000  | 0.00000  | 0.00000  | 0.00000  | 0.00000  |
| 81 | C6 | S   | -0.00005 | -0.99556 | -0.00040 | -0.00004 | -0.00071 |
| 82 | C6 | S   | -0.00030 | -0.02754 | -0.00038 | -0.00006 | 0.00023  |
| 83 | C6 | PX  | -0.00005 | -0.00006 | -0.00007 | -0.00003 | 0.00001  |
| 84 | C6 | PY  | -0.00009 | 0.00022  | -0.00007 | 0.00005  | 0.00009  |
| 85 | C6 | PZ  | 0.00000  | 0.00000  | 0.00000  | 0.00000  | 0.00000  |
| 86 | C6 | S   | -0.00424 | 0.00877  | 0.00480  | 0.00002  | -0.00015 |
| 87 | C6 | PX  | 0.00018  | 0.00460  | 0.00276  | 0.00037  | -0.00039 |

|     |    |     |          |          |          |          |          |
|-----|----|-----|----------|----------|----------|----------|----------|
| 88  | C6 | PY  | 0.00160  | 0.00281  | -0.00122 | -0.00010 | -0.00316 |
| 89  | C6 | PZ  | 0.00000  | 0.00000  | 0.00000  | 0.00000  | 0.00000  |
| 90  | C6 | DXX | 0.00009  | 0.00177  | 0.00006  | 0.00000  | 0.00003  |
| 91  | C6 | DYY | 0.00059  | 0.00094  | 0.00017  | -0.00002 | -0.00010 |
| 92  | C6 | DZZ | 0.00003  | 0.00241  | -0.00009 | -0.00003 | 0.00006  |
| 93  | C6 | DXY | 0.00019  | -0.00008 | -0.00001 | 0.00003  | 0.00002  |
| 94  | C6 | DXZ | 0.00000  | 0.00000  | 0.00000  | 0.00000  | 0.00000  |
| 95  | C6 | DYZ | 0.00000  | 0.00000  | 0.00000  | 0.00000  | 0.00000  |
| 96  | C7 | S   | -0.00002 | 0.00154  | 0.02231  | 0.00586  | -0.00010 |
| 97  | C7 | S   | -0.00005 | -0.00027 | 0.00078  | 0.00020  | -0.00015 |
| 98  | C7 | PX  | -0.00005 | 0.00005  | 0.00006  | 0.00002  | 0.00001  |
| 99  | C7 | PY  | -0.00003 | -0.00005 | 0.00005  | -0.00006 | 0.00004  |
| 100 | C7 | PZ  | 0.00000  | 0.00000  | 0.00000  | 0.00000  | 0.00000  |
| 101 | C7 | S   | 0.00160  | 0.00610  | 0.00335  | 0.00129  | 0.00360  |
| 102 | C7 | PX  | -0.00097 | -0.00416 | -0.00120 | -0.00073 | -0.00147 |
| 103 | C7 | PY  | 0.00105  | 0.00112  | -0.00258 | 0.00063  | 0.00105  |
| 104 | C7 | PZ  | 0.00000  | 0.00000  | 0.00000  | 0.00000  | 0.00000  |
| 105 | C7 | DXX | 0.00000  | -0.00006 | -0.00072 | -0.00010 | 0.00002  |
| 106 | C7 | DYY | -0.00002 | -0.00009 | -0.00034 | -0.00007 | 0.00001  |
| 107 | C7 | DZZ | -0.00001 | -0.00017 | -0.00015 | -0.00002 | -0.00005 |
| 108 | C7 | DXY | 0.00002  | 0.00008  | -0.00013 | -0.00007 | 0.00000  |
| 109 | C7 | DXZ | 0.00000  | 0.00000  | 0.00000  | 0.00000  | 0.00000  |
| 110 | C7 | DYZ | 0.00000  | 0.00000  | 0.00000  | 0.00000  | 0.00000  |
| 111 | H3 | S   | 0.00000  | 0.00000  | -0.00001 | -0.00001 | 0.00010  |
| 112 | H3 | S   | 0.00010  | 0.00023  | -0.00029 | -0.00010 | 0.00021  |
| 113 | H3 | PX  | 0.00000  | 0.00001  | 0.00001  | 0.00000  | 0.00002  |
| 114 | H3 | PY  | 0.00001  | 0.00002  | -0.00001 | 0.00000  | 0.00006  |
| 115 | H3 | PZ  | 0.00000  | 0.00000  | 0.00000  | 0.00000  | 0.00000  |
| 116 | H4 | S   | -0.00006 | -0.00012 | 0.00006  | 0.00000  | 0.00025  |
| 117 | H4 | S   | -0.00027 | -0.00079 | 0.00043  | 0.00004  | -0.00186 |
| 118 | H4 | PX  | 0.00001  | 0.00003  | 0.00000  | 0.00000  | 0.00014  |
| 119 | H4 | PY  | 0.00002  | 0.00001  | 0.00000  | 0.00000  | -0.00021 |
| 120 | H4 | PZ  | 0.00000  | 0.00000  | 0.00000  | 0.00000  | 0.00000  |
| 121 | N1 | S   | -0.99524 | 0.00031  | -0.00011 | -0.00004 | 0.00004  |
| 122 | N1 | S   | -0.02515 | -0.00072 | 0.00073  | 0.00001  | 0.00015  |
| 123 | N1 | PX  | -0.00197 | 0.00006  | 0.00002  | -0.00003 | -0.00001 |
| 124 | N1 | PY  | -0.00078 | -0.00009 | -0.00011 | -0.00003 | 0.00000  |
| 125 | N1 | PZ  | 0.00000  | 0.00000  | 0.00000  | 0.00000  | 0.00000  |
| 126 | N1 | S   | 0.00731  | 0.00539  | -0.00350 | 0.00086  | -0.00201 |
| 127 | N1 | PX  | 0.00294  | 0.00164  | -0.00208 | 0.00018  | -0.00006 |
| 128 | N1 | PY  | 0.00070  | 0.00204  | 0.00046  | 0.00006  | -0.00076 |
| 129 | N1 | PZ  | 0.00000  | 0.00000  | 0.00000  | 0.00000  | 0.00000  |
| 130 | N1 | DXX | 0.00282  | 0.00015  | -0.00040 | -0.00010 | 0.00012  |
| 131 | N1 | DYY | 0.00262  | 0.00013  | -0.00011 | -0.00016 | 0.00003  |
| 132 | N1 | DZZ | 0.00306  | -0.00047 | 0.00041  | -0.00002 | 0.00007  |
| 133 | N1 | DXY | -0.00021 | 0.00004  | 0.00023  | 0.00009  | 0.00000  |
| 134 | N1 | DXZ | 0.00000  | 0.00000  | 0.00000  | 0.00000  | 0.00000  |
| 135 | N1 | DYZ | 0.00000  | 0.00000  | 0.00000  | 0.00000  | 0.00000  |
| 136 | H6 | S   | -0.00002 | -0.00009 | -0.00004 | -0.00001 | 0.00001  |
| 137 | H6 | S   | -0.00001 | -0.00031 | -0.00037 | -0.00004 | 0.00017  |
| 138 | H6 | PX  | 0.00003  | -0.00010 | 0.00000  | 0.00000  | -0.00013 |
| 139 | H6 | PY  | 0.00004  | 0.00003  | -0.00001 | 0.00000  | -0.00004 |
| 140 | H6 | PZ  | 0.00000  | 0.00000  | 0.00000  | 0.00000  | 0.00000  |
| 141 | C8 | S   | -0.00002 | -0.00036 | 0.99275  | 0.07266  | -0.00008 |



|    |    |     |          |          |          |          |          |
|----|----|-----|----------|----------|----------|----------|----------|
| 5  | H1 | PZ  | 0.00000  | 0.00000  | 0.00000  | 0.00000  | 0.00000  |
| 6  | C1 | S   | -0.95337 | 0.03077  | -0.27760 | -0.06524 | -0.00041 |
| 7  | C1 | S   | -0.02630 | 0.00067  | -0.00767 | -0.00173 | 0.00029  |
| 8  | C1 | PX  | 0.00015  | 0.00001  | 0.00013  | 0.00014  | 0.00002  |
| 9  | C1 | PY  | 0.00024  | -0.00007 | -0.00003 | 0.00020  | 0.00007  |
| 10 | C1 | PZ  | 0.00000  | 0.00000  | 0.00000  | 0.00000  | 0.00000  |
| 11 | C1 | S   | 0.00840  | 0.00260  | 0.00266  | 0.00377  | -0.00490 |
| 12 | C1 | PX  | -0.00007 | -0.00181 | 0.00104  | -0.00069 | 0.00263  |
| 13 | C1 | PY  | 0.00014  | -0.00002 | 0.00144  | -0.00103 | 0.00079  |
| 14 | C1 | PZ  | 0.00000  | 0.00000  | 0.00000  | 0.00000  | 0.00000  |
| 15 | C1 | DXX | 0.00158  | 0.00001  | 0.00000  | -0.00040 | -0.00009 |
| 16 | C1 | DYY | 0.00160  | -0.00003 | 0.00007  | -0.00058 | -0.00006 |
| 17 | C1 | DZZ | 0.00237  | -0.00011 | 0.00071  | 0.00002  | 0.00008  |
| 18 | C1 | DXY | 0.00013  | -0.00001 | 0.00002  | -0.00026 | -0.00002 |
| 19 | C1 | DXZ | 0.00000  | 0.00000  | 0.00000  | 0.00000  | 0.00000  |
| 20 | C1 | DYZ | 0.00000  | 0.00000  | 0.00000  | 0.00000  | 0.00000  |
| 21 | C2 | S   | 0.00327  | -0.00002 | -0.00995 | -0.00583 | 0.99383  |
| 22 | C2 | S   | -0.00003 | 0.00019  | -0.00070 | -0.00030 | 0.02758  |
| 23 | C2 | PX  | 0.00005  | 0.00001  | -0.00002 | -0.00004 | 0.00030  |
| 24 | C2 | PY  | -0.00005 | 0.00003  | -0.00001 | 0.00001  | -0.00010 |
| 25 | C2 | PZ  | 0.00000  | 0.00000  | 0.00000  | 0.00000  | 0.00000  |
| 26 | C2 | S   | 0.00287  | -0.00316 | 0.00463  | 0.00032  | -0.00969 |
| 27 | C2 | PX  | 0.00126  | -0.00212 | 0.00270  | 0.00016  | -0.00009 |
| 28 | C2 | PY  | -0.00069 | -0.00040 | -0.00073 | -0.00017 | -0.00049 |
| 29 | C2 | PZ  | 0.00000  | 0.00000  | 0.00000  | 0.00000  | 0.00000  |
| 30 | C2 | DXX | 0.00002  | -0.00007 | 0.00015  | 0.00008  | -0.00153 |
| 31 | C2 | DYY | -0.00002 | 0.00002  | 0.00018  | 0.00010  | -0.00151 |
| 32 | C2 | DZZ | -0.00003 | 0.00006  | -0.00012 | -0.00003 | -0.00249 |
| 33 | C2 | DXY | -0.00002 | 0.00000  | 0.00003  | -0.00003 | 0.00014  |
| 34 | C2 | DXZ | 0.00000  | 0.00000  | 0.00000  | 0.00000  | 0.00000  |
| 35 | C2 | DYZ | 0.00000  | 0.00000  | 0.00000  | 0.00000  | 0.00000  |
| 36 | C3 | S   | -0.06061 | -0.14358 | -0.03720 | 0.98259  | 0.00548  |
| 37 | C3 | S   | -0.00163 | -0.00364 | -0.00118 | 0.02765  | 0.00007  |
| 38 | C3 | PX  | 0.00006  | -0.00001 | 0.00005  | -0.00014 | 0.00003  |
| 39 | C3 | PY  | 0.00003  | -0.00019 | -0.00012 | -0.00002 | -0.00016 |
| 40 | C3 | PZ  | 0.00000  | 0.00000  | 0.00000  | 0.00000  | 0.00000  |
| 41 | C3 | S   | -0.00488 | -0.00538 | -0.00244 | -0.01646 | -0.00156 |
| 42 | C3 | PX  | 0.00039  | 0.00017  | -0.00048 | 0.00126  | 0.00053  |
| 43 | C3 | PY  | 0.00238  | -0.00009 | 0.00563  | 0.00150  | 0.00590  |
| 44 | C3 | PZ  | 0.00000  | 0.00000  | 0.00000  | 0.00000  | 0.00000  |
| 45 | C3 | DXX | 0.00045  | 0.00058  | 0.00021  | -0.00175 | 0.00007  |
| 46 | C3 | DYY | 0.00060  | 0.00059  | 0.00035  | -0.00099 | 0.00002  |
| 47 | C3 | DZZ | 0.00029  | 0.00047  | 0.00012  | -0.00229 | -0.00003 |
| 48 | C3 | DXY | 0.00020  | 0.00007  | 0.00008  | 0.00012  | 0.00003  |
| 49 | C3 | DXZ | 0.00000  | 0.00000  | 0.00000  | 0.00000  | 0.00000  |
| 50 | C3 | DYZ | 0.00000  | 0.00000  | 0.00000  | 0.00000  | 0.00000  |
| 51 | C4 | S   | -0.27703 | 0.02303  | 0.95303  | 0.02234  | 0.00638  |
| 52 | C4 | S   | -0.00749 | 0.00084  | 0.02627  | 0.00045  | -0.00011 |
| 53 | C4 | PX  | 0.00015  | -0.00004 | -0.00012 | 0.00002  | 0.00008  |
| 54 | C4 | PY  | -0.00010 | 0.00000  | -0.00012 | 0.00002  | 0.00000  |
| 55 | C4 | PZ  | 0.00000  | 0.00000  | 0.00000  | 0.00000  | 0.00000  |
| 56 | C4 | S   | 0.00074  | -0.00273 | -0.01004 | -0.00071 | 0.00211  |
| 57 | C4 | PX  | -0.00115 | 0.00058  | -0.00012 | -0.00001 | -0.00057 |
| 58 | C4 | PY  | 0.00063  | 0.00169  | -0.00002 | -0.00002 | -0.00161 |

|     |    |     |          |          |          |          |          |
|-----|----|-----|----------|----------|----------|----------|----------|
| 59  | C4 | PZ  | 0.00000  | 0.00000  | 0.00000  | 0.00000  | 0.00000  |
| 60  | C4 | DXX | 0.00079  | -0.00004 | -0.00139 | 0.00006  | 0.00014  |
| 61  | C4 | DYY | 0.00077  | -0.00010 | -0.00127 | 0.00014  | 0.00006  |
| 62  | C4 | DZZ | 0.00071  | 0.00001  | -0.00234 | -0.00010 | -0.00009 |
| 63  | C4 | DXY | 0.00007  | 0.00000  | -0.00014 | -0.00003 | 0.00003  |
| 64  | C4 | DXZ | 0.00000  | 0.00000  | 0.00000  | 0.00000  | 0.00000  |
| 65  | C4 | DYZ | 0.00000  | 0.00000  | 0.00000  | 0.00000  | 0.00000  |
| 66  | C5 | S   | 0.02813  | -0.00194 | -0.06663 | -0.00035 | -0.05820 |
| 67  | C5 | S   | 0.00095  | -0.00016 | -0.00148 | -0.00001 | -0.00170 |
| 68  | C5 | PX  | 0.00010  | 0.00000  | -0.00004 | -0.00002 | 0.00011  |
| 69  | C5 | PY  | -0.00001 | -0.00002 | -0.00001 | 0.00003  | 0.00014  |
| 70  | C5 | PZ  | 0.00000  | 0.00000  | 0.00000  | 0.00000  | 0.00000  |
| 71  | C5 | S   | -0.00220 | 0.00282  | 0.00110  | 0.00017  | 0.00292  |
| 72  | C5 | PX  | -0.00099 | 0.00043  | 0.00030  | 0.00006  | -0.00112 |
| 73  | C5 | PY  | 0.00086  | -0.00137 | 0.00161  | 0.00000  | -0.00065 |
| 74  | C5 | PZ  | 0.00000  | 0.00000  | 0.00000  | 0.00000  | 0.00000  |
| 75  | C5 | DXX | 0.00004  | 0.00000  | -0.00058 | -0.00007 | -0.00031 |
| 76  | C5 | DYY | 0.00001  | 0.00001  | -0.00021 | -0.00005 | -0.00035 |
| 77  | C5 | DZZ | 0.00002  | -0.00002 | 0.00014  | -0.00003 | 0.00012  |
| 78  | C5 | DXY | 0.00007  | 0.00000  | -0.00008 | 0.00001  | 0.00001  |
| 79  | C5 | DXZ | 0.00000  | 0.00000  | 0.00000  | 0.00000  | 0.00000  |
| 80  | C5 | DYZ | 0.00000  | 0.00000  | 0.00000  | 0.00000  | 0.00000  |
| 81  | C6 | S   | -0.00004 | 0.00010  | 0.00046  | -0.01203 | -0.01154 |
| 82  | C6 | S   | 0.00011  | -0.00009 | 0.00019  | -0.00025 | -0.00018 |
| 83  | C6 | PX  | 0.00004  | -0.00001 | 0.00000  | -0.00006 | 0.00008  |
| 84  | C6 | PY  | 0.00012  | -0.00001 | 0.00009  | 0.00005  | 0.00001  |
| 85  | C6 | PZ  | 0.00000  | 0.00000  | 0.00000  | 0.00000  | 0.00000  |
| 86  | C6 | S   | 0.00031  | 0.00046  | -0.00148 | 0.00528  | 0.00431  |
| 87  | C6 | PX  | 0.00115  | 0.00097  | 0.00060  | 0.00226  | -0.00003 |
| 88  | C6 | PY  | -0.00301 | 0.00322  | -0.00469 | -0.00096 | -0.00275 |
| 89  | C6 | PZ  | 0.00000  | 0.00000  | 0.00000  | 0.00000  | 0.00000  |
| 90  | C6 | DXX | 0.00001  | -0.00008 | 0.00003  | -0.00059 | -0.00033 |
| 91  | C6 | DYY | 0.00000  | -0.00006 | -0.00004 | -0.00028 | -0.00051 |
| 92  | C6 | DZZ | 0.00004  | -0.00005 | 0.00003  | -0.00012 | -0.00008 |
| 93  | C6 | DXY | 0.00000  | 0.00003  | -0.00001 | 0.00006  | 0.00018  |
| 94  | C6 | DXZ | 0.00000  | 0.00000  | 0.00000  | 0.00000  | 0.00000  |
| 95  | C6 | DYZ | 0.00000  | 0.00000  | 0.00000  | 0.00000  | 0.00000  |
| 96  | C7 | S   | -0.02747 | -0.98415 | 0.01912  | -0.14547 | -0.00065 |
| 97  | C7 | S   | -0.00091 | -0.02740 | 0.00025  | -0.00438 | -0.00024 |
| 98  | C7 | PX  | 0.00006  | 0.00020  | 0.00000  | 0.00016  | -0.00002 |
| 99  | C7 | PY  | 0.00008  | -0.00003 | 0.00007  | -0.00021 | 0.00009  |
| 100 | C7 | PZ  | 0.00000  | 0.00000  | 0.00000  | 0.00000  | 0.00000  |
| 101 | C7 | S   | 0.00449  | 0.01233  | 0.00615  | 0.00820  | 0.00575  |
| 102 | C7 | PX  | -0.00221 | -0.00237 | -0.00233 | -0.00188 | -0.00234 |
| 103 | C7 | PY  | 0.00081  | 0.00057  | 0.00195  | 0.00178  | 0.00158  |
| 104 | C7 | PZ  | 0.00000  | 0.00000  | 0.00000  | 0.00000  | 0.00000  |
| 105 | C7 | DXX | 0.00004  | 0.00145  | -0.00002 | -0.00032 | 0.00004  |
| 106 | C7 | DYY | 0.00003  | 0.00160  | -0.00001 | -0.00016 | 0.00003  |
| 107 | C7 | DZZ | 0.00004  | 0.00236  | -0.00014 | 0.00023  | -0.00006 |
| 108 | C7 | DXY | 0.00005  | 0.00030  | 0.00003  | 0.00024  | -0.00002 |
| 109 | C7 | DXZ | 0.00000  | 0.00000  | 0.00000  | 0.00000  | 0.00000  |
| 110 | C7 | DYZ | 0.00000  | 0.00000  | 0.00000  | 0.00000  | 0.00000  |
| 111 | H3 | S   | 0.00005  | -0.00005 | -0.00025 | -0.00001 | 0.00006  |
| 112 | H3 | S   | -0.00042 | -0.00045 | 0.00188  | 0.00019  | 0.00057  |

|     |     |     |          |          |          |          |          |
|-----|-----|-----|----------|----------|----------|----------|----------|
| 113 | H3  | PX  | -0.00001 | 0.00000  | 0.00013  | 0.00002  | -0.00003 |
| 114 | H3  | PY  | 0.00008  | -0.00002 | 0.00027  | 0.00003  | 0.00003  |
| 115 | H3  | PZ  | 0.00000  | 0.00000  | 0.00000  | 0.00000  | 0.00000  |
| 116 | H4  | S   | -0.00004 | 0.00002  | -0.00010 | 0.00001  | 0.00003  |
| 117 | H4  | S   | -0.00034 | 0.00026  | -0.00068 | 0.00001  | -0.00028 |
| 118 | H4  | PX  | -0.00003 | 0.00000  | 0.00004  | 0.00000  | 0.00006  |
| 119 | H4  | PY  | 0.00000  | 0.00001  | -0.00009 | -0.00002 | -0.00017 |
| 120 | H4  | PZ  | 0.00000  | 0.00000  | 0.00000  | 0.00000  | 0.00000  |
| 121 | N1  | S   | 0.00003  | -0.00011 | 0.00003  | 0.00007  | 0.00007  |
| 122 | N1  | S   | 0.00013  | -0.00029 | 0.00011  | 0.00019  | 0.00014  |
| 123 | N1  | PX  | -0.00001 | -0.00002 | 0.00000  | 0.00005  | 0.00005  |
| 124 | N1  | PY  | -0.00005 | -0.00002 | -0.00004 | -0.00001 | -0.00004 |
| 125 | N1  | PZ  | 0.00000  | 0.00000  | 0.00000  | 0.00000  | 0.00000  |
| 126 | N1  | S   | -0.00175 | 0.00408  | -0.00204 | -0.00220 | -0.00278 |
| 127 | N1  | PX  | -0.00038 | 0.00092  | -0.00024 | -0.00075 | -0.00036 |
| 128 | N1  | PY  | -0.00019 | 0.00083  | -0.00041 | -0.00001 | -0.00064 |
| 129 | N1  | PZ  | 0.00000  | 0.00000  | 0.00000  | 0.00000  | 0.00000  |
| 130 | N1  | DXX | 0.00006  | -0.00027 | 0.00008  | 0.00016  | 0.00018  |
| 131 | N1  | DYY | 0.00005  | -0.00017 | 0.00006  | 0.00016  | 0.00017  |
| 132 | N1  | DZZ | 0.00005  | -0.00019 | 0.00004  | 0.00014  | 0.00005  |
| 133 | N1  | DXY | -0.00003 | 0.00002  | -0.00002 | 0.00004  | 0.00000  |
| 134 | N1  | DXZ | 0.00000  | 0.00000  | 0.00000  | 0.00000  | 0.00000  |
| 135 | N1  | DYZ | 0.00000  | 0.00000  | 0.00000  | 0.00000  | 0.00000  |
| 136 | H6  | S   | -0.00002 | -0.00006 | 0.00004  | 0.00000  | -0.00028 |
| 137 | H6  | S   | 0.00023  | -0.00059 | 0.00078  | 0.00013  | 0.00191  |
| 138 | H6  | PX  | -0.00001 | 0.00002  | -0.00003 | 0.00000  | -0.00027 |
| 139 | H6  | PY  | 0.00002  | 0.00001  | 0.00003  | -0.00001 | 0.00002  |
| 140 | H6  | PZ  | 0.00000  | 0.00000  | 0.00000  | 0.00000  | 0.00000  |
| 141 | C8  | S   | 0.00066  | 0.02278  | -0.00047 | 0.00339  | -0.00009 |
| 142 | C8  | S   | 0.00016  | 0.00054  | 0.00015  | 0.00005  | 0.00015  |
| 143 | C8  | PX  | -0.00004 | 0.00008  | -0.00005 | 0.00001  | -0.00005 |
| 144 | C8  | PY  | 0.00002  | 0.00001  | 0.00006  | 0.00007  | 0.00008  |
| 145 | C8  | PZ  | 0.00000  | 0.00000  | 0.00000  | 0.00000  | 0.00000  |
| 146 | C8  | S   | -0.00155 | -0.00480 | -0.00138 | -0.00123 | -0.00118 |
| 147 | C8  | PX  | -0.00121 | -0.00094 | -0.00092 | -0.00158 | -0.00098 |
| 148 | C8  | PY  | -0.00148 | -0.00170 | -0.00207 | -0.00073 | -0.00168 |
| 149 | C8  | PZ  | 0.00000  | 0.00000  | 0.00000  | 0.00000  | 0.00000  |
| 150 | C8  | DXX | 0.00001  | 0.00040  | -0.00002 | 0.00014  | -0.00002 |
| 151 | C8  | DYY | 0.00002  | 0.00041  | 0.00001  | 0.00024  | 0.00005  |
| 152 | C8  | DZZ | 0.00004  | 0.00007  | 0.00005  | 0.00006  | 0.00006  |
| 153 | C8  | DXY | -0.00004 | 0.00021  | -0.00004 | 0.00009  | -0.00002 |
| 154 | C8  | DXZ | 0.00000  | 0.00000  | 0.00000  | 0.00000  | 0.00000  |
| 155 | C8  | DYZ | 0.00000  | 0.00000  | 0.00000  | 0.00000  | 0.00000  |
| 156 | H8  | S   | 0.00008  | 0.00048  | 0.00000  | 0.00010  | 0.00001  |
| 157 | H8  | S   | 0.00059  | -0.00121 | 0.00070  | -0.00003 | 0.00062  |
| 158 | H8  | PX  | -0.00001 | -0.00031 | 0.00000  | -0.00019 | 0.00001  |
| 159 | H8  | PY  | 0.00002  | 0.00009  | -0.00003 | 0.00006  | -0.00002 |
| 160 | H8  | PZ  | 0.00000  | 0.00000  | 0.00000  | 0.00000  | 0.00000  |
| 161 | C10 | S   | -0.00023 | -0.00425 | 0.00005  | -0.00023 | 0.00004  |
| 162 | C10 | S   | -0.00001 | -0.00004 | 0.00000  | 0.00001  | 0.00001  |
| 163 | C10 | PX  | -0.00002 | 0.00006  | -0.00004 | -0.00002 | -0.00003 |
| 164 | C10 | PY  | -0.00002 | -0.00002 | -0.00004 | -0.00004 | -0.00004 |
| 165 | C10 | PZ  | 0.00000  | 0.00000  | 0.00000  | 0.00000  | 0.00000  |
| 166 | C10 | S   | -0.00066 | -0.00001 | -0.00113 | -0.00030 | -0.00095 |



|     |     |     |          |          |          |          |          |
|-----|-----|-----|----------|----------|----------|----------|----------|
| 167 | C10 | PX  | 0.00052  | -0.00029 | 0.00052  | 0.00070  | 0.00049  |
| 168 | C10 | PY  | -0.00030 | -0.00008 | -0.00041 | -0.00014 | -0.00039 |
| 169 | C10 | PZ  | 0.00000  | 0.00000  | 0.00000  | 0.00000  | 0.00000  |
| 170 | C10 | DXX | -0.00001 | -0.00004 | -0.00002 | 0.00000  | -0.00001 |
| 171 | C10 | DYY | -0.00001 | -0.00013 | -0.00001 | -0.00008 | -0.00003 |
| 172 | C10 | DZZ | 0.00000  | 0.00005  | -0.00001 | 0.00001  | 0.00000  |
| 173 | C10 | DXY | 0.00002  | 0.00002  | 0.00001  | 0.00005  | 0.00002  |
| 174 | C10 | DXZ | 0.00000  | 0.00000  | 0.00000  | 0.00000  | 0.00000  |
| 175 | C10 | DYZ | 0.00000  | 0.00000  | 0.00000  | 0.00000  | 0.00000  |
| 176 | H16 | S   | -0.00004 | 0.00008  | -0.00004 | -0.00005 | -0.00004 |
| 177 | H16 | S   | -0.00022 | 0.00007  | -0.00016 | -0.00021 | -0.00017 |
| 178 | H16 | PX  | 0.00000  | -0.00001 | -0.00001 | -0.00001 | 0.00000  |
| 179 | H16 | PY  | 0.00000  | 0.00003  | 0.00000  | 0.00001  | 0.00000  |
| 180 | H16 | PZ  | 0.00000  | 0.00000  | 0.00000  | 0.00000  | 0.00000  |
| 181 | H18 | S   | 0.00005  | -0.00004 | 0.00007  | 0.00006  | 0.00006  |
| 182 | H18 | S   | 0.00016  | -0.00024 | 0.00021  | 0.00025  | 0.00017  |
| 183 | H18 | PX  | 0.00000  | 0.00001  | 0.00001  | 0.00000  | 0.00000  |
| 184 | H18 | PY  | 0.00000  | -0.00001 | 0.00000  | 0.00000  | 0.00000  |
| 185 | H18 | PZ  | 0.00000  | 0.00000  | 0.00000  | 0.00000  | 0.00000  |

|              |           |           |           |           |           |
|--------------|-----------|-----------|-----------|-----------|-----------|
| MO:          | 11        | 12        | 13        | 14        | 15        |
| Eigenvalues: | -1.27357  | -1.13269  | -1.07025  | -1.03312  | -0.99958  |
| (ev):        | -34.65549 | -30.82212 | -29.12296 | -28.11256 | -27.20010 |

|    |    |     |          |          |          |          |          |
|----|----|-----|----------|----------|----------|----------|----------|
|    |    | A   | A        | A        | A        | A        |          |
| 1  | H1 | S   | 0.00508  | 0.04286  | -0.03663 | 0.01218  | -0.06232 |
| 2  | H1 | S   | -0.00659 | 0.00783  | -0.01223 | 0.00554  | -0.01052 |
| 3  | H1 | PX  | -0.00056 | -0.00474 | 0.00373  | -0.00106 | 0.00637  |
| 4  | H1 | PY  | 0.00007  | -0.00008 | 0.00052  | -0.00051 | -0.00063 |
| 5  | H1 | PZ  | 0.00000  | 0.00000  | 0.00000  | 0.00000  | 0.00000  |
| 6  | C1 | S   | -0.01704 | -0.10122 | 0.06278  | -0.01742 | 0.10159  |
| 7  | C1 | S   | 0.03515  | 0.19254  | -0.11923 | 0.03329  | -0.19743 |
| 8  | C1 | PX  | -0.01380 | -0.06328 | 0.01518  | 0.00202  | 0.03112  |
| 9  | C1 | PY  | -0.01048 | 0.02228  | 0.02771  | -0.05775 | -0.09198 |
| 10 | C1 | PZ  | 0.00000  | 0.00000  | 0.00000  | 0.00000  | 0.00000  |
| 11 | C1 | S   | 0.00014  | 0.12411  | -0.09381 | 0.03294  | -0.12199 |
| 12 | C1 | PX  | 0.01674  | -0.00861 | 0.00974  | -0.00553 | -0.02028 |
| 13 | C1 | PY  | -0.00405 | 0.00374  | 0.00297  | -0.01056 | -0.01688 |
| 14 | C1 | PZ  | 0.00000  | 0.00000  | 0.00000  | 0.00000  | 0.00000  |
| 15 | C1 | DXX | 0.00039  | 0.00323  | -0.00048 | -0.00005 | -0.00250 |
| 16 | C1 | DYY | 0.00237  | 0.00761  | -0.00732 | 0.00388  | -0.00386 |
| 17 | C1 | DZZ | -0.00110 | -0.00879 | 0.00572  | -0.00196 | 0.00720  |
| 18 | C1 | DXY | 0.00111  | -0.00303 | -0.00176 | 0.00572  | 0.00805  |
| 19 | C1 | DXZ | 0.00000  | 0.00000  | 0.00000  | 0.00000  | 0.00000  |
| 20 | C1 | DYZ | 0.00000  | 0.00000  | 0.00000  | 0.00000  | 0.00000  |
| 21 | C2 | S   | -0.02843 | -0.08173 | -0.08158 | 0.04291  | -0.09962 |
| 22 | C2 | S   | 0.05266  | 0.15673  | 0.15473  | -0.08095 | 0.19269  |
| 23 | C2 | PX  | 0.01858  | 0.05640  | 0.02697  | -0.01484 | 0.03094  |
| 24 | C2 | PY  | -0.02189 | 0.03667  | -0.00290 | -0.06621 | 0.02991  |
| 25 | C2 | PZ  | 0.00000  | 0.00000  | 0.00000  | 0.00000  | 0.00000  |
| 26 | C2 | S   | 0.03640  | 0.08409  | 0.12102  | -0.05828 | 0.12680  |
| 27 | C2 | PX  | 0.00244  | -0.00816 | 0.00794  | -0.00480 | -0.01208 |
| 28 | C2 | PY  | -0.01578 | 0.00280  | -0.00156 | -0.01531 | 0.00757  |
| 29 | C2 | PZ  | 0.00000  | 0.00000  | 0.00000  | 0.00000  | 0.00000  |

|    |    |     |          |          |          |          |          |
|----|----|-----|----------|----------|----------|----------|----------|
| 30 | C2 | DXX | -0.00008 | 0.00281  | 0.00094  | -0.00032 | 0.00260  |
| 31 | C2 | DYY | 0.00514  | 0.00528  | 0.00885  | -0.00168 | 0.00556  |
| 32 | C2 | DZZ | -0.00308 | -0.00648 | -0.00684 | 0.00312  | -0.00740 |
| 33 | C2 | DXY | -0.00249 | 0.00342  | 0.00015  | -0.00676 | 0.00133  |
| 34 | C2 | DXZ | 0.00000  | 0.00000  | 0.00000  | 0.00000  | 0.00000  |
| 35 | C2 | DYZ | 0.00000  | 0.00000  | 0.00000  | 0.00000  | 0.00000  |
| 36 | C3 | S   | -0.06210 | -0.06494 | 0.09229  | -0.08166 | -0.04395 |
| 37 | C3 | S   | 0.11552  | 0.12555  | -0.17551 | 0.15746  | 0.08500  |
| 38 | C3 | PX  | -0.03852 | 0.00348  | -0.05756 | -0.01045 | -0.02326 |
| 39 | C3 | PY  | -0.03599 | 0.05348  | 0.04817  | -0.02863 | -0.11117 |
| 40 | C3 | PZ  | 0.00000  | 0.00000  | 0.00000  | 0.00000  | 0.00000  |
| 41 | C3 | S   | 0.05414  | 0.06134  | -0.13372 | 0.10388  | 0.06914  |
| 42 | C3 | PX  | -0.01472 | 0.00884  | -0.00452 | 0.00197  | 0.00210  |
| 43 | C3 | PY  | 0.01019  | 0.01746  | 0.00622  | -0.00936 | -0.05975 |
| 44 | C3 | PZ  | 0.00000  | 0.00000  | 0.00000  | 0.00000  | 0.00000  |
| 45 | C3 | DXX | 0.00731  | 0.00241  | 0.00532  | 0.00486  | 0.00152  |
| 46 | C3 | DYY | 0.00450  | 0.00831  | -0.01490 | 0.00508  | 0.00000  |
| 47 | C3 | DZZ | -0.00592 | -0.00547 | 0.00695  | -0.00623 | -0.00269 |
| 48 | C3 | DXY | 0.00217  | 0.00232  | 0.00041  | 0.00068  | -0.00808 |
| 49 | C3 | DXZ | 0.00000  | 0.00000  | 0.00000  | 0.00000  | 0.00000  |
| 50 | C3 | DYZ | 0.00000  | 0.00000  | 0.00000  | 0.00000  | 0.00000  |
| 51 | C4 | S   | -0.01115 | -0.10899 | 0.01557  | 0.04274  | 0.10134  |
| 52 | C4 | S   | 0.02007  | 0.20724  | -0.03067 | -0.08134 | -0.19282 |
| 53 | C4 | PX  | -0.00247 | -0.01578 | -0.04421 | 0.04096  | -0.07867 |
| 54 | C4 | PY  | -0.01027 | -0.06254 | 0.02813  | -0.00849 | 0.05598  |
| 55 | C4 | PZ  | 0.00000  | 0.00000  | 0.00000  | 0.00000  | 0.00000  |
| 56 | C4 | S   | 0.03508  | 0.12516  | -0.00970 | -0.06477 | -0.17700 |
| 57 | C4 | PX  | -0.00476 | -0.00317 | -0.00784 | 0.00914  | -0.00326 |
| 58 | C4 | PY  | -0.00998 | -0.00379 | -0.00730 | 0.00430  | 0.01316  |
| 59 | C4 | PZ  | 0.00000  | 0.00000  | 0.00000  | 0.00000  | 0.00000  |
| 60 | C4 | DXX | 0.00103  | 0.00828  | 0.00440  | -0.00741 | 0.00129  |
| 61 | C4 | DYY | 0.00082  | 0.00483  | -0.00350 | 0.00115  | -0.00814 |
| 62 | C4 | DZZ | -0.00110 | -0.00940 | 0.00076  | 0.00398  | 0.00775  |
| 63 | C4 | DXY | -0.00036 | -0.00385 | 0.00367  | -0.00109 | 0.00799  |
| 64 | C4 | DXZ | 0.00000  | 0.00000  | 0.00000  | 0.00000  | 0.00000  |
| 65 | C4 | DYZ | 0.00000  | 0.00000  | 0.00000  | 0.00000  | 0.00000  |
| 66 | C5 | S   | -0.01295 | -0.10306 | -0.05186 | 0.07778  | -0.04746 |
| 67 | C5 | S   | 0.02730  | 0.19488  | 0.10120  | -0.14998 | 0.08939  |
| 68 | C5 | PX  | 0.00136  | 0.02733  | -0.03222 | -0.00091 | -0.09624 |
| 69 | C5 | PY  | -0.01364 | -0.05246 | -0.04201 | 0.02209  | -0.06857 |
| 70 | C5 | PZ  | 0.00000  | 0.00000  | 0.00000  | 0.00000  | 0.00000  |
| 71 | C5 | S   | 0.00686  | 0.13990  | 0.05912  | -0.10381 | 0.09140  |
| 72 | C5 | PX  | -0.01354 | 0.01121  | -0.00713 | -0.00240 | -0.00568 |
| 73 | C5 | PY  | 0.00881  | -0.01635 | 0.00732  | -0.00225 | -0.01476 |
| 74 | C5 | PZ  | 0.00000  | 0.00000  | 0.00000  | 0.00000  | 0.00000  |
| 75 | C5 | DXX | 0.00040  | 0.00859  | -0.00148 | -0.00467 | -0.00830 |
| 76 | C5 | DYY | 0.00108  | 0.00445  | 0.00505  | -0.00322 | 0.00881  |
| 77 | C5 | DZZ | -0.00056 | -0.00942 | -0.00365 | 0.00642  | -0.00340 |
| 78 | C5 | DXY | 0.00067  | 0.00358  | 0.00388  | -0.00306 | 0.00611  |
| 79 | C5 | DXZ | 0.00000  | 0.00000  | 0.00000  | 0.00000  | 0.00000  |
| 80 | C5 | DYZ | 0.00000  | 0.00000  | 0.00000  | 0.00000  | 0.00000  |
| 81 | C6 | S   | -0.11142 | -0.02696 | -0.06497 | -0.04975 | -0.02426 |
| 82 | C6 | S   | 0.21497  | 0.05202  | 0.12958  | 0.09830  | 0.04650  |
| 83 | C6 | PX  | -0.00405 | 0.02770  | -0.10777 | 0.04491  | 0.03034  |

|     |    |     |          |          |          |          |          |
|-----|----|-----|----------|----------|----------|----------|----------|
| 84  | C6 | PY  | -0.10745 | 0.09706  | -0.02603 | -0.04404 | 0.11721  |
| 85  | C6 | PZ  | 0.00000  | 0.00000  | 0.00000  | 0.00000  | 0.00000  |
| 86  | C6 | S   | 0.04237  | 0.05241  | 0.06301  | 0.06853  | 0.05741  |
| 87  | C6 | PX  | 0.01862  | 0.01628  | -0.00106 | 0.02695  | 0.00986  |
| 88  | C6 | PY  | 0.02472  | 0.02468  | 0.01534  | -0.00791 | 0.04176  |
| 89  | C6 | PZ  | 0.00000  | 0.00000  | 0.00000  | 0.00000  | 0.00000  |
| 90  | C6 | DXX | 0.00004  | 0.00770  | -0.00958 | 0.00803  | 0.00875  |
| 91  | C6 | DYY | 0.01759  | -0.00145 | 0.01448  | -0.00183 | -0.00199 |
| 92  | C6 | DZZ | -0.01220 | -0.00247 | -0.00617 | -0.00484 | -0.00181 |
| 93  | C6 | DXY | 0.00446  | -0.00517 | 0.00290  | 0.00358  | -0.01190 |
| 94  | C6 | DXZ | 0.00000  | 0.00000  | 0.00000  | 0.00000  | 0.00000  |
| 95  | C6 | DYZ | 0.00000  | 0.00000  | 0.00000  | 0.00000  | 0.00000  |
| 96  | C7 | S   | -0.05479 | -0.00837 | 0.11160  | -0.02793 | -0.08464 |
| 97  | C7 | S   | 0.10131  | 0.01407  | -0.21525 | 0.05265  | 0.16412  |
| 98  | C7 | PX  | -0.05311 | 0.01217  | 0.04029  | 0.00294  | -0.02446 |
| 99  | C7 | PY  | 0.01620  | 0.03771  | -0.03702 | 0.09495  | 0.03157  |
| 100 | C7 | PZ  | 0.00000  | 0.00000  | 0.00000  | 0.00000  | 0.00000  |
| 101 | C7 | S   | 0.06529  | 0.03244  | -0.13974 | 0.04620  | 0.08859  |
| 102 | C7 | PX  | -0.01327 | -0.01100 | -0.00470 | -0.00022 | 0.01487  |
| 103 | C7 | PY  | 0.01731  | 0.00261  | 0.00139  | 0.00839  | -0.01426 |
| 104 | C7 | PZ  | 0.00000  | 0.00000  | 0.00000  | 0.00000  | 0.00000  |
| 105 | C7 | DXX | 0.00568  | -0.00345 | -0.00326 | -0.00361 | 0.00222  |
| 106 | C7 | DYY | 0.00369  | 0.00243  | -0.00873 | 0.00351  | 0.00544  |
| 107 | C7 | DZZ | -0.00570 | -0.00052 | 0.00878  | -0.00198 | -0.00654 |
| 108 | C7 | DXY | 0.00036  | -0.00308 | -0.00003 | -0.00907 | -0.00348 |
| 109 | C7 | DXZ | 0.00000  | 0.00000  | 0.00000  | 0.00000  | 0.00000  |
| 110 | C7 | DYZ | 0.00000  | 0.00000  | 0.00000  | 0.00000  | 0.00000  |
| 111 | H3 | S   | 0.00307  | 0.04711  | -0.00758 | -0.02638 | -0.06569 |
| 112 | H3 | S   | 0.00169  | 0.00817  | 0.00171  | -0.00993 | -0.02078 |
| 113 | H3 | PX  | -0.00011 | -0.00211 | 0.00001  | 0.00139  | 0.00189  |
| 114 | H3 | PY  | -0.00025 | -0.00476 | 0.00105  | 0.00215  | 0.00631  |
| 115 | H3 | PZ  | 0.00000  | 0.00000  | 0.00000  | 0.00000  | 0.00000  |
| 116 | H4 | S   | 0.00301  | 0.04505  | 0.02704  | -0.04672 | 0.02899  |
| 117 | H4 | S   | -0.00654 | 0.01227  | 0.00189  | -0.01215 | 0.00982  |
| 118 | H4 | PX  | 0.00031  | 0.00241  | 0.00105  | -0.00223 | 0.00050  |
| 119 | H4 | PY  | -0.00027 | -0.00431 | -0.00274 | 0.00415  | -0.00327 |
| 120 | H4 | PZ  | 0.00000  | 0.00000  | 0.00000  | 0.00000  | 0.00000  |
| 121 | N1 | S   | -0.14422 | 0.05226  | -0.06921 | -0.00221 | 0.07083  |
| 122 | N1 | S   | 0.28540  | -0.10838 | 0.14253  | 0.00393  | -0.14880 |
| 123 | N1 | PX  | 0.10533  | -0.03781 | -0.00114 | -0.00205 | -0.02521 |
| 124 | N1 | PY  | 0.05565  | 0.01227  | 0.08376  | 0.08944  | -0.00065 |
| 125 | N1 | PZ  | 0.00000  | 0.00000  | 0.00000  | 0.00000  | 0.00000  |
| 126 | N1 | S   | 0.32801  | -0.10545 | 0.17242  | -0.00303 | -0.16263 |
| 127 | N1 | PX  | 0.06128  | -0.01864 | 0.00923  | -0.00751 | -0.01621 |
| 128 | N1 | PY  | 0.02279  | 0.01197  | 0.03252  | 0.03653  | 0.00455  |
| 129 | N1 | PZ  | 0.00000  | 0.00000  | 0.00000  | 0.00000  | 0.00000  |
| 130 | N1 | DXX | 0.00583  | -0.00405 | -0.00621 | -0.00293 | -0.00070 |
| 131 | N1 | DYY | 0.00608  | -0.00117 | 0.00607  | 0.00102  | -0.00195 |
| 132 | N1 | DZZ | -0.01353 | 0.00362  | -0.00332 | -0.00023 | 0.00361  |
| 133 | N1 | DXY | 0.00259  | 0.00279  | 0.00627  | 0.01155  | 0.00079  |
| 134 | N1 | DXZ | 0.00000  | 0.00000  | 0.00000  | 0.00000  | 0.00000  |
| 135 | N1 | DYZ | 0.00000  | 0.00000  | 0.00000  | 0.00000  | 0.00000  |
| 136 | H6 | S   | 0.01021  | 0.03125  | 0.04482  | -0.02299 | 0.05826  |
| 137 | H6 | S   | 0.00074  | -0.00106 | 0.01154  | -0.00736 | 0.01027  |

|     |     |     |          |          |          |          |          |
|-----|-----|-----|----------|----------|----------|----------|----------|
| 138 | H6  | PX  | 0.00132  | 0.00352  | 0.00476  | -0.00247 | 0.00581  |
| 139 | H6  | PY  | 0.00025  | 0.00044  | 0.00001  | -0.00071 | 0.00069  |
| 140 | H6  | PZ  | 0.00000  | 0.00000  | 0.00000  | 0.00000  | 0.00000  |
| 141 | C8  | S   | -0.08826 | 0.04637  | 0.06712  | 0.10125  | -0.00594 |
| 142 | C8  | S   | 0.16846  | -0.09040 | -0.13103 | -0.19849 | 0.00996  |
| 143 | C8  | PX  | -0.04358 | 0.03327  | -0.07860 | 0.02159  | 0.09741  |
| 144 | C8  | PY  | 0.06687  | -0.00300 | 0.03594  | 0.13992  | -0.00773 |
| 145 | C8  | PZ  | 0.00000  | 0.00000  | 0.00000  | 0.00000  | 0.00000  |
| 146 | C8  | S   | 0.04461  | -0.05447 | -0.09646 | -0.13342 | 0.02587  |
| 147 | C8  | PX  | 0.02993  | -0.01586 | -0.01592 | -0.01459 | 0.01350  |
| 148 | C8  | PY  | -0.00505 | -0.00122 | -0.01380 | 0.01365  | 0.01864  |
| 149 | C8  | PZ  | 0.00000  | 0.00000  | 0.00000  | 0.00000  | 0.00000  |
| 150 | C8  | DXX | 0.00795  | -0.00264 | -0.00047 | 0.00434  | -0.00079 |
| 151 | C8  | DYY | 0.01224  | -0.00436 | -0.00597 | -0.00822 | 0.00118  |
| 152 | C8  | DZZ | -0.00993 | 0.00440  | 0.00516  | 0.00721  | -0.00003 |
| 153 | C8  | DXY | -0.00910 | 0.00502  | -0.01305 | 0.00014  | 0.01304  |
| 154 | C8  | DXZ | 0.00000  | 0.00000  | 0.00000  | 0.00000  | 0.00000  |
| 155 | C8  | DYZ | 0.00000  | 0.00000  | 0.00000  | 0.00000  | 0.00000  |
| 156 | H8  | S   | 0.01512  | 0.00456  | -0.05839 | 0.00728  | 0.04888  |
| 157 | H8  | S   | 0.00498  | 0.00389  | -0.01031 | -0.00114 | 0.00734  |
| 158 | H8  | PX  | -0.00146 | -0.00042 | 0.00540  | -0.00036 | -0.00409 |
| 159 | H8  | PY  | 0.00025  | 0.00068  | -0.00225 | 0.00136  | 0.00195  |
| 160 | H8  | PZ  | 0.00000  | 0.00000  | 0.00000  | 0.00000  | 0.00000  |
| 161 | C10 | S   | -0.02546 | 0.02737  | 0.05883  | 0.13573  | -0.00705 |
| 162 | C10 | S   | 0.04820  | -0.05287 | -0.11293 | -0.26146 | 0.01321  |
| 163 | C10 | PX  | -0.00158 | 0.00198  | -0.01455 | -0.00419 | 0.01684  |
| 164 | C10 | PY  | 0.03175  | -0.02668 | -0.04463 | -0.08784 | 0.00185  |
| 165 | C10 | PZ  | 0.00000  | 0.00000  | 0.00000  | 0.00000  | 0.00000  |
| 166 | C10 | S   | 0.03321  | -0.03605 | -0.09138 | -0.20180 | 0.01996  |
| 167 | C10 | PX  | -0.01366 | 0.00630  | -0.00082 | 0.00029  | 0.00147  |
| 168 | C10 | PY  | 0.00650  | -0.00198 | -0.00588 | -0.00783 | 0.00323  |
| 169 | C10 | PZ  | 0.00000  | 0.00000  | 0.00000  | 0.00000  | 0.00000  |
| 170 | C10 | DXX | -0.00228 | 0.00136  | 0.00148  | 0.00274  | 0.00033  |
| 171 | C10 | DYY | 0.00304  | -0.00311 | -0.00511 | -0.01228 | -0.00007 |
| 172 | C10 | DZZ | -0.00191 | 0.00210  | 0.00480  | 0.01137  | -0.00057 |
| 173 | C10 | DXY | -0.00136 | 0.00059  | -0.00247 | -0.00090 | 0.00201  |
| 174 | C10 | DXZ | 0.00000  | 0.00000  | 0.00000  | 0.00000  | 0.00000  |
| 175 | C10 | DYZ | 0.00000  | 0.00000  | 0.00000  | 0.00000  | 0.00000  |
| 176 | H16 | S   | 0.00892  | -0.01196 | -0.03506 | -0.07744 | 0.01033  |
| 177 | H16 | S   | 0.00489  | -0.00319 | -0.00814 | -0.01848 | 0.00470  |
| 178 | H16 | PX  | -0.00071 | 0.00094  | 0.00296  | 0.00625  | -0.00080 |
| 179 | H16 | PY  | 0.00052  | -0.00092 | -0.00273 | -0.00551 | 0.00079  |
| 180 | H16 | PZ  | 0.00000  | 0.00000  | 0.00000  | 0.00000  | 0.00000  |
| 181 | H18 | S   | 0.00944  | -0.01359 | -0.02685 | -0.07738 | -0.00159 |
| 182 | H18 | S   | -0.00397 | 0.00043  | -0.00219 | -0.01651 | -0.00259 |
| 183 | H18 | PX  | 0.00136  | -0.00137 | -0.00241 | -0.00706 | -0.00014 |
| 184 | H18 | PY  | 0.00078  | -0.00106 | -0.00146 | -0.00460 | -0.00037 |
| 185 | H18 | PZ  | 0.00000  | 0.00000  | 0.00000  | 0.00000  | 0.00000  |

|              |           |           |           |           |           |
|--------------|-----------|-----------|-----------|-----------|-----------|
| MO:          | 16        | 17        | 18        | 19        | 20        |
| Eigenvalues: | -0.90918  | -0.80562  | -0.79464  | -0.75492  | -0.68891  |
| (ev):        | -24.74003 | -21.92213 | -21.62336 | -20.54253 | -18.74617 |

A

A

A

A

A

|    |    |     |          |          |          |          |          |
|----|----|-----|----------|----------|----------|----------|----------|
| 1  | H1 | S   | -0.04160 | -0.12145 | 0.00323  | 0.05688  | -0.06736 |
| 2  | H1 | S   | -0.01017 | -0.05224 | 0.01110  | 0.03304  | -0.04468 |
| 3  | H1 | PX  | 0.00365  | 0.00918  | -0.00050 | -0.00351 | 0.00419  |
| 4  | H1 | PY  | 0.00081  | 0.00096  | 0.00218  | -0.00145 | -0.00167 |
| 5  | H1 | PZ  | 0.00000  | 0.00000  | 0.00000  | 0.00000  | 0.00000  |
| 6  | C1 | S   | 0.05775  | 0.08513  | 0.00938  | -0.01010 | -0.00133 |
| 7  | C1 | S   | -0.11573 | -0.17100 | -0.02332 | 0.02053  | 0.00611  |
| 8  | C1 | PX  | 0.00710  | -0.09298 | 0.01550  | 0.09237  | -0.11945 |
| 9  | C1 | PY  | 0.06789  | 0.02496  | 0.18373  | -0.06510 | -0.11735 |
| 10 | C1 | PZ  | 0.00000  | 0.00000  | 0.00000  | 0.00000  | 0.00000  |
| 11 | C1 | S   | -0.06845 | -0.14148 | 0.03355  | 0.02456  | -0.02407 |
| 12 | C1 | PX  | -0.01697 | -0.05352 | -0.02600 | 0.03131  | -0.03181 |
| 13 | C1 | PY  | 0.01212  | 0.00887  | 0.04166  | -0.01756 | -0.03582 |
| 14 | C1 | PZ  | 0.00000  | 0.00000  | 0.00000  | 0.00000  | 0.00000  |
| 15 | C1 | DXX | -0.00283 | -0.00463 | -0.00152 | 0.00037  | 0.00039  |
| 16 | C1 | DYY | -0.00327 | -0.00103 | -0.00223 | 0.00204  | 0.00091  |
| 17 | C1 | DZZ | 0.00460  | 0.00585  | 0.00089  | -0.00070 | 0.00012  |
| 18 | C1 | DXY | -0.00724 | -0.00092 | -0.01249 | 0.00262  | 0.00364  |
| 19 | C1 | DXZ | 0.00000  | 0.00000  | 0.00000  | 0.00000  | 0.00000  |
| 20 | C1 | DYZ | 0.00000  | 0.00000  | 0.00000  | 0.00000  | 0.00000  |
| 21 | C2 | S   | 0.04350  | 0.07420  | -0.03920 | 0.01662  | 0.03760  |
| 22 | C2 | S   | -0.08703 | -0.14631 | 0.08207  | -0.03424 | -0.07515 |
| 23 | C2 | PX  | -0.01126 | 0.08051  | -0.03454 | -0.07343 | 0.16026  |
| 24 | C2 | PY  | 0.12115  | -0.07770 | -0.16856 | 0.03158  | -0.04769 |
| 25 | C2 | PZ  | 0.00000  | 0.00000  | 0.00000  | 0.00000  | 0.00000  |
| 26 | C2 | S   | -0.06684 | -0.13397 | 0.04277  | -0.00450 | -0.07966 |
| 27 | C2 | PX  | 0.00491  | 0.03374  | -0.03445 | -0.00780 | 0.08162  |
| 28 | C2 | PY  | 0.02475  | -0.02157 | -0.03089 | 0.01386  | -0.00879 |
| 29 | C2 | PZ  | 0.00000  | 0.00000  | 0.00000  | 0.00000  | 0.00000  |
| 30 | C2 | DXX | -0.00357 | -0.00222 | 0.00403  | -0.00315 | -0.00534 |
| 31 | C2 | DYY | -0.00338 | -0.00042 | 0.00156  | 0.00319  | 0.00500  |
| 32 | C2 | DZZ | 0.00383  | 0.00475  | -0.00276 | 0.00129  | 0.00208  |
| 33 | C2 | DXY | 0.01108  | -0.00667 | -0.01027 | 0.00333  | -0.00130 |
| 34 | C2 | DXZ | 0.00000  | 0.00000  | 0.00000  | 0.00000  | 0.00000  |
| 35 | C2 | DYZ | 0.00000  | 0.00000  | 0.00000  | 0.00000  | 0.00000  |
| 36 | C3 | S   | 0.03808  | -0.03418 | 0.07748  | -0.00916 | 0.01713  |
| 37 | C3 | S   | -0.07750 | 0.06855  | -0.15457 | 0.01859  | -0.03461 |
| 38 | C3 | PX  | 0.03273  | -0.16396 | -0.01726 | 0.15777  | 0.06922  |
| 39 | C3 | PY  | -0.13504 | -0.05792 | -0.08410 | -0.06009 | 0.17632  |
| 40 | C3 | PZ  | 0.00000  | 0.00000  | 0.00000  | 0.00000  | 0.00000  |
| 41 | C3 | S   | -0.05057 | 0.04554  | -0.14254 | 0.03376  | 0.00087  |
| 42 | C3 | PX  | -0.00081 | -0.04004 | -0.00716 | 0.05432  | 0.01684  |
| 43 | C3 | PY  | -0.05841 | -0.02267 | -0.07335 | -0.02976 | 0.05808  |
| 44 | C3 | PZ  | 0.00000  | 0.00000  | 0.00000  | 0.00000  | 0.00000  |
| 45 | C3 | DXX | -0.00898 | 0.01101  | -0.00229 | -0.00553 | -0.00013 |
| 46 | C3 | DYY | 0.00177  | -0.00785 | -0.00301 | 0.00309  | 0.00094  |
| 47 | C3 | DZZ | 0.00292  | -0.00263 | 0.00521  | 0.00055  | 0.00122  |
| 48 | C3 | DXY | -0.00499 | -0.00448 | -0.00735 | -0.00217 | -0.00062 |
| 49 | C3 | DXZ | 0.00000  | 0.00000  | 0.00000  | 0.00000  | 0.00000  |
| 50 | C3 | DYZ | 0.00000  | 0.00000  | 0.00000  | 0.00000  | 0.00000  |
| 51 | C4 | S   | -0.06019 | -0.05636 | -0.06729 | 0.01110  | 0.01646  |
| 52 | C4 | S   | 0.11904  | 0.11326  | 0.13538  | -0.02204 | -0.03331 |
| 53 | C4 | PX  | -0.08377 | -0.10407 | 0.11259  | -0.02642 | -0.17111 |
| 54 | C4 | PY  | 0.06968  | 0.08345  | 0.02454  | 0.07067  | -0.11192 |

|     |    |     |          |          |          |          |          |
|-----|----|-----|----------|----------|----------|----------|----------|
| 55  | C4 | PZ  | 0.00000  | 0.00000  | 0.00000  | 0.00000  | 0.00000  |
| 56  | C4 | S   | 0.08897  | 0.09334  | 0.09205  | -0.01122 | -0.02255 |
| 57  | C4 | PX  | -0.01544 | -0.02359 | 0.04149  | -0.00810 | -0.06591 |
| 58  | C4 | PY  | 0.02639  | 0.04149  | 0.04615  | 0.01376  | -0.06440 |
| 59  | C4 | PZ  | 0.00000  | 0.00000  | 0.00000  | 0.00000  | 0.00000  |
| 60  | C4 | DXX | 0.01100  | 0.00615  | -0.00428 | 0.00359  | 0.00610  |
| 61  | C4 | DYY | -0.00325 | -0.00052 | 0.00496  | -0.00228 | -0.00487 |
| 62  | C4 | DZZ | -0.00498 | -0.00450 | -0.00405 | 0.00075  | 0.00079  |
| 63  | C4 | DXY | 0.00355  | 0.00618  | -0.00086 | 0.00038  | -0.00026 |
| 64  | C4 | DXZ | 0.00000  | 0.00000  | 0.00000  | 0.00000  | 0.00000  |
| 65  | C4 | DYZ | 0.00000  | 0.00000  | 0.00000  | 0.00000  | 0.00000  |
| 66  | C5 | S   | -0.08796 | -0.01045 | 0.07223  | -0.03450 | -0.02427 |
| 67  | C5 | S   | 0.17246  | 0.02146  | -0.14566 | 0.07086  | 0.05172  |
| 68  | C5 | PX  | 0.04460  | 0.15524  | 0.06255  | -0.03717 | 0.13116  |
| 69  | C5 | PY  | 0.06428  | 0.08617  | -0.02383 | 0.10429  | -0.03240 |
| 70  | C5 | PZ  | 0.00000  | 0.00000  | 0.00000  | 0.00000  | 0.00000  |
| 71  | C5 | S   | 0.15077  | 0.02723  | -0.11528 | 0.05742  | 0.02725  |
| 72  | C5 | PX  | 0.01072  | 0.04103  | 0.03473  | -0.01619 | 0.03684  |
| 73  | C5 | PY  | 0.02056  | 0.01847  | -0.03962 | 0.05438  | 0.00374  |
| 74  | C5 | PZ  | 0.00000  | 0.00000  | 0.00000  | 0.00000  | 0.00000  |
| 75  | C5 | DXX | 0.01002  | 0.00931  | 0.00244  | 0.00112  | 0.00310  |
| 76  | C5 | DYY | -0.00091 | -0.00463 | -0.00447 | 0.00081  | -0.00141 |
| 77  | C5 | DZZ | -0.00729 | -0.00158 | 0.00490  | -0.00215 | -0.00145 |
| 78  | C5 | DXY | -0.00050 | -0.00522 | 0.00204  | -0.00245 | -0.00471 |
| 79  | C5 | DXZ | 0.00000  | 0.00000  | 0.00000  | 0.00000  | 0.00000  |
| 80  | C5 | DYZ | 0.00000  | 0.00000  | 0.00000  | 0.00000  | 0.00000  |
| 81  | C6 | S   | 0.07157  | -0.07266 | -0.04705 | 0.00784  | -0.01064 |
| 82  | C6 | S   | -0.14644 | 0.14981  | 0.09828  | -0.01466 | 0.02337  |
| 83  | C6 | PX  | 0.01391  | 0.11485  | -0.15118 | -0.13225 | -0.09436 |
| 84  | C6 | PY  | -0.10589 | -0.01234 | 0.04628  | -0.16102 | 0.03599  |
| 85  | C6 | PZ  | 0.00000  | 0.00000  | 0.00000  | 0.00000  | 0.00000  |
| 86  | C6 | S   | -0.12706 | 0.13253  | 0.10678  | -0.02242 | 0.00900  |
| 87  | C6 | PX  | -0.00951 | 0.04892  | -0.04696 | -0.03250 | -0.04201 |
| 88  | C6 | PY  | -0.03098 | -0.00265 | 0.03807  | -0.05677 | 0.01374  |
| 89  | C6 | PZ  | 0.00000  | 0.00000  | 0.00000  | 0.00000  | 0.00000  |
| 90  | C6 | DXX | -0.00705 | 0.01075  | -0.00445 | -0.00643 | -0.00827 |
| 91  | C6 | DYY | 0.00048  | -0.00623 | 0.00502  | 0.00169  | 0.00423  |
| 92  | C6 | DZZ | 0.00497  | -0.00536 | -0.00334 | -0.00044 | -0.00040 |
| 93  | C6 | DXY | 0.00139  | 0.00345  | -0.00612 | 0.01257  | 0.01106  |
| 94  | C6 | DXZ | 0.00000  | 0.00000  | 0.00000  | 0.00000  | 0.00000  |
| 95  | C6 | DYZ | 0.00000  | 0.00000  | 0.00000  | 0.00000  | 0.00000  |
| 96  | C7 | S   | -0.07287 | 0.02533  | -0.07196 | -0.03984 | -0.02519 |
| 97  | C7 | S   | 0.14539  | -0.05308 | 0.14459  | 0.08058  | 0.05014  |
| 98  | C7 | PX  | -0.03317 | -0.04423 | 0.03498  | 0.15496  | 0.20404  |
| 99  | C7 | PY  | -0.01619 | 0.05328  | -0.12489 | 0.09959  | -0.14194 |
| 100 | C7 | PZ  | 0.00000  | 0.00000  | 0.00000  | 0.00000  | 0.00000  |
| 101 | C7 | S   | 0.08401  | -0.04537 | 0.10262  | 0.06671  | 0.06998  |
| 102 | C7 | PX  | 0.01642  | -0.01871 | 0.03777  | 0.06366  | 0.08637  |
| 103 | C7 | PY  | -0.01213 | 0.01143  | -0.05470 | 0.00905  | -0.05467 |
| 104 | C7 | PZ  | 0.00000  | 0.00000  | 0.00000  | 0.00000  | 0.00000  |
| 105 | C7 | DXX | 0.00753  | -0.00341 | 0.00915  | -0.00603 | 0.00603  |
| 106 | C7 | DYY | -0.00034 | 0.00131  | -0.00355 | 0.00415  | -0.00466 |
| 107 | C7 | DZZ | -0.00563 | 0.00146  | -0.00508 | -0.00174 | -0.00142 |
| 108 | C7 | DXY | 0.00041  | -0.00634 | 0.00288  | -0.01012 | 0.00114  |

|     |     |     |          |          |          |          |          |
|-----|-----|-----|----------|----------|----------|----------|----------|
| 109 | C7  | DXZ | 0.00000  | 0.00000  | 0.00000  | 0.00000  | 0.00000  |
| 110 | C7  | DYZ | 0.00000  | 0.00000  | 0.00000  | 0.00000  | 0.00000  |
| 111 | H3  | S   | 0.06002  | 0.06581  | 0.09444  | 0.01757  | -0.11496 |
| 112 | H3  | S   | 0.02149  | 0.02696  | 0.03606  | 0.01339  | -0.06681 |
| 113 | H3  | PX  | -0.00310 | -0.00352 | -0.00205 | -0.00100 | 0.00177  |
| 114 | H3  | PY  | -0.00404 | -0.00379 | -0.00729 | -0.00026 | 0.00696  |
| 115 | H3  | PZ  | 0.00000  | 0.00000  | 0.00000  | 0.00000  | 0.00000  |
| 116 | H4  | S   | 0.08449  | 0.00901  | -0.08978 | 0.08953  | -0.02741 |
| 117 | H4  | S   | 0.03200  | 0.00588  | -0.03307 | 0.04377  | -0.02477 |
| 118 | H4  | PX  | 0.00422  | 0.00212  | -0.00314 | 0.00316  | 0.00035  |
| 119 | H4  | PY  | -0.00588 | 0.00081  | 0.00642  | -0.00505 | 0.00183  |
| 120 | H4  | PZ  | 0.00000  | 0.00000  | 0.00000  | 0.00000  | 0.00000  |
| 121 | N1  | S   | -0.02368 | 0.03648  | 0.02404  | -0.04288 | -0.03197 |
| 122 | N1  | S   | 0.05000  | -0.07984 | -0.05061 | 0.09645  | 0.07032  |
| 123 | N1  | PX  | 0.05352  | -0.00064 | -0.05283 | -0.08713 | -0.08173 |
| 124 | N1  | PY  | -0.04912 | 0.10794  | 0.12745  | 0.16277  | 0.02407  |
| 125 | N1  | PZ  | 0.00000  | 0.00000  | 0.00000  | 0.00000  | 0.00000  |
| 126 | N1  | S   | 0.05351  | -0.10848 | -0.07332 | 0.09284  | 0.10369  |
| 127 | N1  | PX  | 0.02230  | -0.00620 | -0.02380 | -0.05139 | -0.04127 |
| 128 | N1  | PY  | -0.02575 | 0.05482  | 0.04624  | 0.06420  | 0.00851  |
| 129 | N1  | PZ  | 0.00000  | 0.00000  | 0.00000  | 0.00000  | 0.00000  |
| 130 | N1  | DXX | 0.00840  | -0.00295 | -0.00709 | -0.01352 | -0.01005 |
| 131 | N1  | DYY | -0.00540 | 0.00274  | 0.00606  | 0.00884  | 0.00517  |
| 132 | N1  | DZZ | -0.00249 | 0.00054  | 0.00186  | 0.00131  | 0.00175  |
| 133 | N1  | DXY | -0.00376 | 0.01334  | 0.00720  | 0.01260  | -0.00146 |
| 134 | N1  | DXZ | 0.00000  | 0.00000  | 0.00000  | 0.00000  | 0.00000  |
| 135 | N1  | DYZ | 0.00000  | 0.00000  | 0.00000  | 0.00000  | 0.00000  |
| 136 | H6  | S   | -0.03166 | -0.10256 | 0.05580  | 0.02188  | -0.12510 |
| 137 | H6  | S   | -0.00820 | -0.04558 | 0.01919  | 0.01775  | -0.06567 |
| 138 | H6  | PX  | -0.00277 | -0.00812 | 0.00401  | 0.00126  | -0.00776 |
| 139 | H6  | PY  | 0.00120  | -0.00147 | -0.00220 | -0.00012 | -0.00168 |
| 140 | H6  | PZ  | 0.00000  | 0.00000  | 0.00000  | 0.00000  | 0.00000  |
| 141 | C8  | S   | -0.02072 | 0.04113  | -0.00115 | 0.09331  | -0.00193 |
| 142 | C8  | S   | 0.04332  | -0.08510 | 0.00053  | -0.19212 | 0.00295  |
| 143 | C8  | PX  | 0.02338  | 0.03998  | 0.16493  | -0.00140 | 0.01329  |
| 144 | C8  | PY  | 0.15596  | -0.04921 | -0.00631 | -0.03376 | -0.08864 |
| 145 | C8  | PZ  | 0.00000  | 0.00000  | 0.00000  | 0.00000  | 0.00000  |
| 146 | C8  | S   | 0.03849  | -0.06912 | 0.01776  | -0.16223 | 0.00794  |
| 147 | C8  | PX  | 0.02304  | -0.00655 | 0.04675  | -0.01709 | 0.00158  |
| 148 | C8  | PY  | 0.04305  | -0.01924 | 0.01621  | -0.01318 | -0.02109 |
| 149 | C8  | PZ  | 0.00000  | 0.00000  | 0.00000  | 0.00000  | 0.00000  |
| 150 | C8  | DXX | 0.01268  | -0.01001 | 0.00126  | -0.00281 | 0.00351  |
| 151 | C8  | DYY | -0.00375 | 0.00664  | -0.00150 | -0.00012 | -0.00750 |
| 152 | C8  | DZZ | -0.00307 | 0.00344  | 0.00102  | 0.00683  | 0.00063  |
| 153 | C8  | DXY | 0.00045  | 0.00398  | 0.01079  | -0.00139 | -0.00295 |
| 154 | C8  | DXZ | 0.00000  | 0.00000  | 0.00000  | 0.00000  | 0.00000  |
| 155 | C8  | DYZ | 0.00000  | 0.00000  | 0.00000  | 0.00000  | 0.00000  |
| 156 | H8  | S   | 0.04832  | -0.05290 | 0.10594  | 0.09624  | 0.16300  |
| 157 | H8  | S   | 0.01033  | -0.02615 | 0.04537  | 0.04826  | 0.09888  |
| 158 | H8  | PX  | -0.00383 | 0.00398  | -0.00761 | -0.00590 | -0.00987 |
| 159 | H8  | PY  | 0.00118  | -0.00125 | 0.00149  | 0.00447  | 0.00259  |
| 160 | H8  | PZ  | 0.00000  | 0.00000  | 0.00000  | 0.00000  | 0.00000  |
| 161 | C10 | S   | 0.09445  | -0.05475 | 0.00771  | -0.05990 | 0.01537  |
| 162 | C10 | S   | -0.18396 | 0.10722  | -0.01637 | 0.11823  | -0.03042 |

|     |     |     |          |          |          |          |          |
|-----|-----|-----|----------|----------|----------|----------|----------|
| 163 | C10 | PX  | 0.00340  | 0.01052  | 0.06352  | -0.00340 | 0.03452  |
| 164 | C10 | PY  | 0.00500  | -0.07564 | 0.00299  | -0.17732 | 0.08893  |
| 165 | C10 | PZ  | 0.00000  | 0.00000  | 0.00000  | 0.00000  | 0.00000  |
| 166 | C10 | S   | -0.15079 | 0.10223  | -0.00658 | 0.12502  | -0.04243 |
| 167 | C10 | PX  | -0.00814 | 0.00847  | 0.01621  | 0.00271  | 0.01467  |
| 168 | C10 | PY  | 0.01177  | -0.02760 | 0.00735  | -0.05955 | 0.03432  |
| 169 | C10 | PZ  | 0.00000  | 0.00000  | 0.00000  | 0.00000  | 0.00000  |
| 170 | C10 | DXX | -0.00286 | 0.00636  | -0.00019 | 0.01307  | -0.00573 |
| 171 | C10 | DYY | -0.00393 | -0.00262 | -0.00012 | -0.00695 | 0.00472  |
| 172 | C10 | DZZ | 0.00814  | -0.00475 | 0.00059  | -0.00538 | 0.00131  |
| 173 | C10 | DXY | 0.00015  | -0.00031 | 0.00145  | -0.00229 | -0.00004 |
| 174 | C10 | DXZ | 0.00000  | 0.00000  | 0.00000  | 0.00000  | 0.00000  |
| 175 | C10 | DYZ | 0.00000  | 0.00000  | 0.00000  | 0.00000  | 0.00000  |
| 176 | H16 | S   | -0.07487 | 0.07389  | 0.01869  | 0.11048  | -0.02693 |
| 177 | H16 | S   | -0.02463 | 0.03526  | 0.01412  | 0.06284  | -0.01429 |
| 178 | H16 | PX  | 0.00557  | -0.00493 | -0.00053 | -0.00676 | 0.00223  |
| 179 | H16 | PY  | -0.00403 | 0.00266  | 0.00123  | 0.00288  | 0.00044  |
| 180 | H16 | PZ  | 0.00000  | 0.00000  | 0.00000  | 0.00000  | 0.00000  |
| 181 | H18 | S   | -0.07680 | 0.06022  | -0.03548 | 0.10033  | -0.05492 |
| 182 | H18 | S   | -0.03074 | 0.02962  | -0.01838 | 0.05674  | -0.03035 |
| 183 | H18 | PX  | -0.00638 | 0.00472  | -0.00203 | 0.00711  | -0.00325 |
| 184 | H18 | PY  | -0.00317 | 0.00098  | -0.00161 | 0.00122  | -0.00025 |
| 185 | H18 | PZ  | 0.00000  | 0.00000  | 0.00000  | 0.00000  | 0.00000  |

|              |           |           |           |           |           |
|--------------|-----------|-----------|-----------|-----------|-----------|
| M0:          | 21        | 22        | 23        | 24        | 25        |
| Eigenvalues: | -0.67123  | -0.65389  | -0.61355  | -0.58253  | -0.56450  |
| (ev):        | -18.26519 | -17.79316 | -16.69552 | -15.85157 | -15.36080 |

|    |    |     |          |          |          |          |          |
|----|----|-----|----------|----------|----------|----------|----------|
|    |    | A   | A        | A        | A        | A        |          |
| 1  | H1 | S   | 0.09914  | -0.06272 | 0.19193  | 0.05053  | 0.02053  |
| 2  | H1 | S   | 0.05294  | -0.04437 | 0.13799  | 0.04307  | 0.02247  |
| 3  | H1 | PX  | -0.00609 | 0.00284  | -0.00983 | -0.00190 | -0.00053 |
| 4  | H1 | PY  | 0.00017  | 0.00277  | -0.00023 | -0.00240 | -0.00197 |
| 5  | H1 | PZ  | 0.00000  | 0.00000  | 0.00000  | 0.00000  | 0.00000  |
| 6  | C1 | S   | -0.04593 | -0.00460 | -0.00298 | 0.01268  | -0.00418 |
| 7  | C1 | S   | 0.09435  | 0.00913  | 0.00366  | -0.02752 | 0.00648  |
| 8  | C1 | PX  | 0.08584  | -0.12195 | 0.29704  | 0.10707  | 0.02828  |
| 9  | C1 | PY  | 0.02406  | 0.16915  | 0.04593  | -0.13632 | -0.14112 |
| 10 | C1 | PZ  | 0.00000  | 0.00000  | 0.00000  | 0.00000  | 0.00000  |
| 11 | C1 | S   | 0.06670  | 0.00498  | 0.00700  | -0.01337 | 0.03634  |
| 12 | C1 | PX  | 0.06892  | -0.04625 | 0.14247  | 0.03288  | 0.00042  |
| 13 | C1 | PY  | 0.00665  | 0.04849  | 0.01160  | -0.04246 | -0.05948 |
| 14 | C1 | PZ  | 0.00000  | 0.00000  | 0.00000  | 0.00000  | 0.00000  |
| 15 | C1 | DXX | 0.00875  | -0.00211 | 0.01300  | 0.00292  | 0.00317  |
| 16 | C1 | DYY | -0.00862 | -0.00135 | -0.01177 | 0.00011  | -0.00041 |
| 17 | C1 | DZZ | -0.00273 | 0.00015  | -0.00102 | 0.00000  | -0.00091 |
| 18 | C1 | DXY | 0.00058  | -0.01262 | 0.00034  | 0.00393  | 0.01200  |
| 19 | C1 | DXZ | 0.00000  | 0.00000  | 0.00000  | 0.00000  | 0.00000  |
| 20 | C1 | DYZ | 0.00000  | 0.00000  | 0.00000  | 0.00000  | 0.00000  |
| 21 | C2 | S   | 0.03518  | -0.01448 | 0.00771  | -0.02183 | -0.00793 |
| 22 | C2 | S   | -0.07343 | 0.02996  | -0.01461 | 0.04702  | 0.01310  |
| 23 | C2 | PX  | 0.04273  | 0.07812  | 0.29080  | 0.07795  | -0.04459 |
| 24 | C2 | PY  | 0.08906  | 0.17501  | 0.00365  | -0.01006 | -0.12356 |
| 25 | C2 | PZ  | 0.00000  | 0.00000  | 0.00000  | 0.00000  | 0.00000  |



|    |    |     |          |          |          |          |          |
|----|----|-----|----------|----------|----------|----------|----------|
| 26 | C2 | S   | -0.04112 | -0.00050 | -0.01376 | 0.02979  | 0.04300  |
| 27 | C2 | PX  | 0.04679  | 0.00926  | 0.14261  | 0.01060  | -0.00939 |
| 28 | C2 | PY  | 0.02599  | 0.04099  | -0.00350 | -0.01148 | -0.04503 |
| 29 | C2 | PZ  | 0.00000  | 0.00000  | 0.00000  | 0.00000  | 0.00000  |
| 30 | C2 | DXX | -0.00721 | -0.00126 | -0.01172 | 0.00163  | 0.00530  |
| 31 | C2 | DYY | 0.00550  | -0.00222 | 0.01042  | -0.00217 | -0.00375 |
| 32 | C2 | DZZ | 0.00196  | -0.00033 | 0.00107  | -0.00047 | -0.00127 |
| 33 | C2 | DXY | 0.00335  | 0.01291  | -0.00232 | 0.00530  | -0.01005 |
| 34 | C2 | DXZ | 0.00000  | 0.00000  | 0.00000  | 0.00000  | 0.00000  |
| 35 | C2 | DYZ | 0.00000  | 0.00000  | 0.00000  | 0.00000  | 0.00000  |
| 36 | C3 | S   | 0.03549  | 0.02848  | 0.03357  | -0.01322 | 0.01301  |
| 37 | C3 | S   | -0.07232 | -0.05906 | -0.06912 | 0.02869  | -0.02733 |
| 38 | C3 | PX  | -0.09585 | -0.03096 | -0.05484 | 0.16789  | -0.07960 |
| 39 | C3 | PY  | 0.07678  | -0.07000 | -0.09928 | -0.06001 | 0.22369  |
| 40 | C3 | PZ  | 0.00000  | 0.00000  | 0.00000  | 0.00000  | 0.00000  |
| 41 | C3 | S   | -0.07230 | -0.08014 | -0.06293 | -0.00912 | -0.02721 |
| 42 | C3 | PX  | -0.03340 | -0.01543 | -0.03904 | 0.09099  | -0.04637 |
| 43 | C3 | PY  | 0.04376  | -0.03315 | -0.03295 | -0.00706 | 0.06729  |
| 44 | C3 | PZ  | 0.00000  | 0.00000  | 0.00000  | 0.00000  | 0.00000  |
| 45 | C3 | DXX | 0.00591  | -0.00516 | 0.00990  | -0.01080 | 0.00886  |
| 46 | C3 | DYY | -0.00265 | 0.00453  | -0.01144 | 0.00632  | -0.00602 |
| 47 | C3 | DZZ | 0.00100  | 0.00099  | 0.00134  | -0.00017 | -0.00024 |
| 48 | C3 | DXY | 0.01209  | -0.00395 | -0.00441 | 0.00121  | 0.00712  |
| 49 | C3 | DXZ | 0.00000  | 0.00000  | 0.00000  | 0.00000  | 0.00000  |
| 50 | C3 | DYZ | 0.00000  | 0.00000  | 0.00000  | 0.00000  | 0.00000  |
| 51 | C4 | S   | 0.04335  | -0.00936 | 0.02374  | -0.00910 | 0.01176  |
| 52 | C4 | S   | -0.09009 | 0.01980  | -0.05002 | 0.02044  | -0.02583 |
| 53 | C4 | PX  | 0.01619  | 0.05530  | 0.01180  | -0.15378 | -0.02969 |
| 54 | C4 | PY  | -0.09009 | -0.22369 | 0.10907  | 0.11449  | 0.13738  |
| 55 | C4 | PZ  | 0.00000  | 0.00000  | 0.00000  | 0.00000  | 0.00000  |
| 56 | C4 | S   | -0.06172 | 0.00155  | -0.02427 | 0.01708  | -0.02264 |
| 57 | C4 | PX  | -0.00996 | 0.01677  | 0.00338  | -0.05083 | -0.00876 |
| 58 | C4 | PY  | -0.07238 | -0.07695 | 0.01919  | 0.05802  | 0.05812  |
| 59 | C4 | PZ  | 0.00000  | 0.00000  | 0.00000  | 0.00000  | 0.00000  |
| 60 | C4 | DXX | 0.00283  | -0.00225 | 0.00791  | 0.00816  | -0.00182 |
| 61 | C4 | DYY | -0.00428 | -0.00080 | -0.00620 | -0.00467 | 0.00336  |
| 62 | C4 | DZZ | 0.00256  | 0.00014  | 0.00081  | -0.00050 | -0.00022 |
| 63 | C4 | DXY | -0.00834 | -0.00520 | 0.00508  | 0.01218  | 0.00431  |
| 64 | C4 | DXZ | 0.00000  | 0.00000  | 0.00000  | 0.00000  | 0.00000  |
| 65 | C4 | DYZ | 0.00000  | 0.00000  | 0.00000  | 0.00000  | 0.00000  |
| 66 | C5 | S   | -0.03934 | 0.00015  | -0.02265 | -0.00101 | 0.01635  |
| 67 | C5 | S   | 0.08164  | -0.00133 | 0.04728  | 0.00323  | -0.03466 |
| 68 | C5 | PX  | -0.10343 | -0.02773 | -0.01842 | 0.17112  | 0.02088  |
| 69 | C5 | PY  | 0.05472  | -0.24525 | -0.09786 | -0.16425 | 0.12537  |
| 70 | C5 | PZ  | 0.00000  | 0.00000  | 0.00000  | 0.00000  | 0.00000  |
| 71 | C5 | S   | 0.05317  | 0.00766  | 0.02798  | 0.01805  | -0.03963 |
| 72 | C5 | PX  | -0.05362 | -0.00346 | -0.01269 | 0.08014  | 0.00637  |
| 73 | C5 | PY  | 0.05942  | -0.10888 | -0.01504 | -0.09244 | 0.05357  |
| 74 | C5 | PZ  | 0.00000  | 0.00000  | 0.00000  | 0.00000  | 0.00000  |
| 75 | C5 | DXX | -0.00591 | -0.00138 | -0.01018 | 0.00576  | -0.00041 |
| 76 | C5 | DYY | 0.00530  | -0.00166 | 0.00815  | -0.00652 | 0.00159  |
| 77 | C5 | DZZ | -0.00223 | 0.00049  | -0.00093 | 0.00054  | 0.00021  |
| 78 | C5 | DXY | -0.00624 | 0.00720  | 0.00383  | 0.01226  | -0.00304 |
| 79 | C5 | DXZ | 0.00000  | 0.00000  | 0.00000  | 0.00000  | 0.00000  |

|     |    |     |          |          |          |          |          |
|-----|----|-----|----------|----------|----------|----------|----------|
| 80  | C5 | DYZ | 0.00000  | 0.00000  | 0.00000  | 0.00000  | 0.00000  |
| 81  | C6 | S   | -0.03316 | 0.03487  | -0.03637 | 0.03747  | 0.00118  |
| 82  | C6 | S   | 0.07362  | -0.07564 | 0.07738  | -0.08314 | -0.00565 |
| 83  | C6 | PX  | 0.03259  | 0.04865  | 0.01585  | -0.11372 | 0.08778  |
| 84  | C6 | PY  | -0.14090 | -0.06554 | 0.11083  | 0.04023  | 0.17581  |
| 85  | C6 | PZ  | 0.00000  | 0.00000  | 0.00000  | 0.00000  | 0.00000  |
| 86  | C6 | S   | 0.03556  | -0.09038 | 0.06001  | -0.06146 | -0.00679 |
| 87  | C6 | PX  | 0.02366  | 0.02782  | -0.00086 | -0.03298 | 0.03365  |
| 88  | C6 | PY  | -0.05442 | -0.01280 | 0.02745  | 0.01235  | 0.06165  |
| 89  | C6 | PZ  | 0.00000  | 0.00000  | 0.00000  | 0.00000  | 0.00000  |
| 90  | C6 | DXX | -0.00306 | -0.00569 | -0.00535 | -0.00638 | 0.00251  |
| 91  | C6 | DYY | 0.00186  | 0.00678  | 0.00699  | 0.00759  | 0.00046  |
| 92  | C6 | DZZ | -0.00321 | 0.00095  | -0.00106 | 0.00152  | 0.00104  |
| 93  | C6 | DXY | 0.00945  | 0.00067  | -0.00679 | -0.00480 | -0.01032 |
| 94  | C6 | DXZ | 0.00000  | 0.00000  | 0.00000  | 0.00000  | 0.00000  |
| 95  | C6 | DYZ | 0.00000  | 0.00000  | 0.00000  | 0.00000  | 0.00000  |
| 96  | C7 | S   | 0.01874  | -0.02671 | -0.01122 | 0.01068  | 0.00461  |
| 97  | C7 | S   | -0.03881 | 0.05337  | 0.02313  | -0.02043 | -0.01100 |
| 98  | C7 | PX  | -0.11690 | -0.00234 | 0.03775  | -0.12838 | 0.05266  |
| 99  | C7 | PY  | -0.17279 | -0.00649 | 0.00412  | 0.12769  | -0.22707 |
| 100 | C7 | PZ  | 0.00000  | 0.00000  | 0.00000  | 0.00000  | 0.00000  |
| 101 | C7 | S   | -0.01352 | 0.06399  | 0.01404  | -0.00795 | 0.01358  |
| 102 | C7 | PX  | -0.06256 | -0.00190 | 0.03152  | -0.08128 | 0.02098  |
| 103 | C7 | PY  | -0.05313 | -0.00477 | 0.00813  | 0.05116  | -0.08427 |
| 104 | C7 | PZ  | 0.00000  | 0.00000  | 0.00000  | 0.00000  | 0.00000  |
| 105 | C7 | DXX | 0.00722  | 0.00570  | 0.00295  | -0.01004 | 0.01675  |
| 106 | C7 | DYY | -0.00406 | -0.00526 | -0.00221 | 0.00930  | -0.01384 |
| 107 | C7 | DZZ | 0.00015  | -0.00194 | -0.00080 | 0.00094  | -0.00067 |
| 108 | C7 | DXY | 0.01158  | -0.00397 | -0.00504 | 0.00682  | 0.00392  |
| 109 | C7 | DXZ | 0.00000  | 0.00000  | 0.00000  | 0.00000  | 0.00000  |
| 110 | C7 | DYZ | 0.00000  | 0.00000  | 0.00000  | 0.00000  | 0.00000  |
| 111 | H3 | S   | -0.08933 | -0.09744 | 0.03752  | 0.03677  | 0.06181  |
| 112 | H3 | S   | -0.04488 | -0.07110 | 0.03676  | 0.02372  | 0.05361  |
| 113 | H3 | PX  | 0.00299  | 0.00420  | -0.00097 | -0.00290 | -0.00253 |
| 114 | H3 | PY  | 0.00454  | 0.00321  | -0.00130 | -0.00014 | -0.00165 |
| 115 | H3 | PZ  | 0.00000  | 0.00000  | 0.00000  | 0.00000  | 0.00000  |
| 116 | H4 | S   | 0.09844  | -0.11972 | -0.02145 | -0.14894 | 0.04695  |
| 117 | H4 | S   | 0.05095  | -0.07927 | -0.02484 | -0.11161 | 0.04145  |
| 118 | H4 | PX  | 0.00235  | -0.00507 | -0.00092 | -0.00279 | 0.00223  |
| 119 | H4 | PY  | -0.00579 | 0.00403  | 0.00024  | 0.00664  | -0.00086 |
| 120 | H4 | PZ  | 0.00000  | 0.00000  | 0.00000  | 0.00000  | 0.00000  |
| 121 | N1 | S   | 0.02667  | -0.01707 | 0.01178  | -0.02490 | -0.00247 |
| 122 | N1 | S   | -0.06010 | 0.03454  | -0.02655 | 0.05571  | 0.00333  |
| 123 | N1 | PX  | 0.05150  | 0.05837  | 0.02204  | -0.03491 | 0.10959  |
| 124 | N1 | PY  | 0.20152  | -0.03140 | -0.04329 | -0.05757 | -0.22395 |
| 125 | N1 | PZ  | 0.00000  | 0.00000  | 0.00000  | 0.00000  | 0.00000  |
| 126 | N1 | S   | -0.10040 | 0.06772  | -0.03141 | 0.08120  | 0.03874  |
| 127 | N1 | PX  | 0.02851  | 0.03286  | 0.01658  | -0.02270 | 0.06800  |
| 128 | N1 | PY  | 0.09581  | -0.00855 | -0.02060 | -0.03055 | -0.10591 |
| 129 | N1 | PZ  | 0.00000  | 0.00000  | 0.00000  | 0.00000  | 0.00000  |
| 130 | N1 | DXX | 0.00158  | 0.00654  | 0.00157  | -0.00095 | 0.01530  |
| 131 | N1 | DYY | 0.00137  | -0.00766 | -0.00049 | -0.00245 | -0.01468 |
| 132 | N1 | DZZ | -0.00200 | -0.00234 | -0.00009 | 0.00082  | -0.00180 |
| 133 | N1 | DXY | 0.01778  | 0.00076  | -0.00306 | -0.00794 | -0.01428 |

|     |     |     |          |          |          |          |          |
|-----|-----|-----|----------|----------|----------|----------|----------|
| 134 | N1  | DXZ | 0.00000  | 0.00000  | 0.00000  | 0.00000  | 0.00000  |
| 135 | N1  | DYZ | 0.00000  | 0.00000  | 0.00000  | 0.00000  | 0.00000  |
| 136 | H6  | S   | -0.06387 | -0.03403 | -0.18801 | -0.02272 | 0.04082  |
| 137 | H6  | S   | -0.03234 | -0.02935 | -0.12633 | -0.02433 | 0.03411  |
| 138 | H6  | PX  | -0.00396 | -0.00143 | -0.00993 | -0.00105 | 0.00197  |
| 139 | H6  | PY  | 0.00102  | 0.00262  | -0.00046 | -0.00053 | -0.00101 |
| 140 | H6  | PZ  | 0.00000  | 0.00000  | 0.00000  | 0.00000  | 0.00000  |
| 141 | C8  | S   | -0.01391 | 0.04034  | 0.00296  | -0.00614 | -0.00422 |
| 142 | C8  | S   | 0.02944  | -0.08157 | -0.00652 | 0.01337  | 0.01229  |
| 143 | C8  | PX  | 0.21140  | -0.01477 | -0.04969 | 0.00946  | -0.04597 |
| 144 | C8  | PY  | 0.02567  | 0.19287  | 0.01378  | 0.05309  | 0.28481  |
| 145 | C8  | PZ  | 0.00000  | 0.00000  | 0.00000  | 0.00000  | 0.00000  |
| 146 | C8  | S   | 0.01456  | -0.07689 | 0.00535  | 0.00509  | 0.03872  |
| 147 | C8  | PX  | 0.05749  | -0.00846 | -0.00048 | -0.02436 | -0.02043 |
| 148 | C8  | PY  | 0.00175  | 0.04255  | 0.00687  | 0.00488  | 0.06865  |
| 149 | C8  | PZ  | 0.00000  | 0.00000  | 0.00000  | 0.00000  | 0.00000  |
| 150 | C8  | DXX | -0.00483 | 0.00989  | 0.00158  | 0.00182  | 0.02229  |
| 151 | C8  | DYY | 0.00607  | -0.00357 | -0.00105 | -0.00052 | -0.01584 |
| 152 | C8  | DZZ | 0.00011  | 0.00101  | -0.00022 | -0.00056 | -0.00228 |
| 153 | C8  | DXY | 0.00247  | -0.00321 | 0.00355  | -0.00849 | -0.01187 |
| 154 | C8  | DXZ | 0.00000  | 0.00000  | 0.00000  | 0.00000  | 0.00000  |
| 155 | C8  | DYZ | 0.00000  | 0.00000  | 0.00000  | 0.00000  | 0.00000  |
| 156 | H8  | S   | -0.04588 | 0.03129  | 0.03607  | -0.12134 | 0.08608  |
| 157 | H8  | S   | -0.02067 | 0.02127  | 0.02468  | -0.08496 | 0.07630  |
| 158 | H8  | PX  | 0.00212  | -0.00165 | -0.00147 | 0.00601  | -0.00420 |
| 159 | H8  | PY  | -0.00382 | 0.00027  | 0.00116  | -0.00095 | -0.00182 |
| 160 | H8  | PZ  | 0.00000  | 0.00000  | 0.00000  | 0.00000  | 0.00000  |
| 161 | C10 | S   | -0.00015 | -0.01351 | -0.00073 | 0.00283  | 0.01965  |
| 162 | C10 | S   | -0.00207 | 0.02536  | 0.00198  | -0.00665 | -0.04177 |
| 163 | C10 | PX  | 0.20343  | -0.02694 | -0.14042 | 0.25234  | 0.04706  |
| 164 | C10 | PY  | -0.01749 | -0.25779 | -0.00872 | -0.05388 | -0.26461 |
| 165 | C10 | PZ  | 0.00000  | 0.00000  | 0.00000  | 0.00000  | 0.00000  |
| 166 | C10 | S   | 0.00153  | 0.04061  | 0.00419  | -0.01365 | -0.05492 |
| 167 | C10 | PX  | 0.08799  | -0.00955 | -0.07029 | 0.12988  | 0.02887  |
| 168 | C10 | PY  | -0.00171 | -0.09457 | -0.00562 | -0.02029 | -0.11082 |
| 169 | C10 | PZ  | 0.00000  | 0.00000  | 0.00000  | 0.00000  | 0.00000  |
| 170 | C10 | DXX | -0.00012 | 0.01586  | 0.00161  | 0.00043  | 0.01382  |
| 171 | C10 | DYY | -0.00022 | -0.01120 | -0.00147 | 0.00014  | -0.00907 |
| 172 | C10 | DZZ | -0.00019 | -0.00207 | -0.00004 | -0.00015 | -0.00005 |
| 173 | C10 | DXY | -0.00487 | -0.00247 | 0.00615  | -0.01499 | -0.00742 |
| 174 | C10 | DXZ | 0.00000  | 0.00000  | 0.00000  | 0.00000  | 0.00000  |
| 175 | C10 | DYZ | 0.00000  | 0.00000  | 0.00000  | 0.00000  | 0.00000  |
| 176 | H16 | S   | 0.10169  | 0.09149  | -0.06809 | 0.15274  | 0.10975  |
| 177 | H16 | S   | 0.06775  | 0.06634  | -0.04817 | 0.11593  | 0.09676  |
| 178 | H16 | PX  | -0.00382 | -0.00535 | 0.00224  | -0.00553 | -0.00479 |
| 179 | H16 | PY  | 0.00417  | -0.00012 | -0.00285 | 0.00484  | -0.00007 |
| 180 | H16 | PZ  | 0.00000  | 0.00000  | 0.00000  | 0.00000  | 0.00000  |
| 181 | H18 | S   | -0.09941 | 0.09849  | 0.08001  | -0.13111 | 0.03112  |
| 182 | H18 | S   | -0.05999 | 0.06781  | 0.05133  | -0.08794 | 0.03307  |
| 183 | H18 | PX  | -0.00418 | 0.00589  | 0.00343  | -0.00526 | 0.00204  |
| 184 | H18 | PY  | -0.00406 | -0.00071 | 0.00221  | -0.00416 | -0.00284 |
| 185 | H18 | PZ  | 0.00000  | 0.00000  | 0.00000  | 0.00000  | 0.00000  |

MO:

26

27

28

29

30

Eigenvalues:        -0.56064    -0.55853    -0.51793    -0.49062    -0.45735  
                   (ev):       -15.25576   -15.19827   -14.09354   -13.35042   -12.44505

|    |    | A   | A        | A        | A        | A        |          |
|----|----|-----|----------|----------|----------|----------|----------|
| 1  | H1 | S   | 0.05829  | 0.00000  | -0.00809 | -0.12105 | 0.00000  |
| 2  | H1 | S   | 0.04003  | 0.00000  | -0.01195 | -0.10928 | 0.00000  |
| 3  | H1 | PX  | -0.00266 | 0.00000  | -0.00042 | 0.00439  | 0.00000  |
| 4  | H1 | PY  | -0.00059 | 0.00000  | 0.00321  | -0.00066 | 0.00000  |
| 5  | H1 | PZ  | 0.00000  | 0.00219  | 0.00000  | 0.00000  | 0.00451  |
| 6  | C1 | S   | -0.02196 | 0.00000  | -0.00557 | -0.00958 | 0.00000  |
| 7  | C1 | S   | 0.04314  | 0.00000  | 0.01073  | 0.02144  | 0.00000  |
| 8  | C1 | PX  | 0.04630  | 0.00000  | -0.02997 | -0.16550 | 0.00000  |
| 9  | C1 | PY  | -0.01424 | 0.00000  | 0.22327  | -0.09963 | 0.00000  |
| 10 | C1 | PZ  | 0.00000  | 0.10483  | 0.00000  | 0.00000  | 0.21403  |
| 11 | C1 | S   | 0.06425  | 0.00000  | -0.00771 | 0.03228  | 0.00000  |
| 12 | C1 | PX  | 0.03164  | 0.00000  | -0.00245 | -0.10987 | 0.00000  |
| 13 | C1 | PY  | -0.00641 | 0.00000  | 0.09655  | -0.03278 | 0.00000  |
| 14 | C1 | PZ  | 0.00000  | 0.05797  | 0.00000  | 0.00000  | 0.15122  |
| 15 | C1 | DXX | 0.00901  | 0.00000  | -0.00125 | -0.01726 | 0.00000  |
| 16 | C1 | DYY | -0.00867 | 0.00000  | -0.00287 | 0.01628  | 0.00000  |
| 17 | C1 | DZZ | -0.00140 | 0.00000  | -0.00010 | -0.00020 | 0.00000  |
| 18 | C1 | DXY | -0.00499 | 0.00000  | -0.01313 | 0.00560  | 0.00000  |
| 19 | C1 | DXZ | 0.00000  | -0.00683 | 0.00000  | 0.00000  | -0.01216 |
| 20 | C1 | DYZ | 0.00000  | -0.00171 | 0.00000  | 0.00000  | 0.01004  |
| 21 | C2 | S   | 0.00449  | 0.00000  | 0.00927  | -0.00469 | 0.00000  |
| 22 | C2 | S   | -0.00961 | 0.00000  | -0.01582 | 0.01303  | 0.00000  |
| 23 | C2 | PX  | -0.07440 | 0.00000  | 0.07198  | 0.18641  | 0.00000  |
| 24 | C2 | PY  | -0.19696 | 0.00000  | -0.19589 | -0.00046 | 0.00000  |
| 25 | C2 | PZ  | 0.00000  | 0.11756  | 0.00000  | 0.00000  | 0.16070  |
| 26 | C2 | S   | 0.02005  | 0.00000  | -0.02342 | -0.00414 | 0.00000  |
| 27 | C2 | PX  | -0.02488 | 0.00000  | 0.05233  | 0.10952  | 0.00000  |
| 28 | C2 | PY  | -0.06950 | 0.00000  | -0.08117 | -0.01101 | 0.00000  |
| 29 | C2 | PZ  | 0.00000  | 0.06362  | 0.00000  | 0.00000  | 0.11706  |
| 30 | C2 | DXX | 0.00596  | 0.00000  | -0.00547 | -0.01669 | 0.00000  |
| 31 | C2 | DYY | -0.00212 | 0.00000  | 0.00769  | 0.01495  | 0.00000  |
| 32 | C2 | DZZ | -0.00024 | 0.00000  | 0.00064  | 0.00027  | 0.00000  |
| 33 | C2 | DXY | -0.00606 | 0.00000  | -0.01507 | -0.00345 | 0.00000  |
| 34 | C2 | DXZ | 0.00000  | 0.00787  | 0.00000  | 0.00000  | 0.00945  |
| 35 | C2 | DYZ | 0.00000  | -0.00179 | 0.00000  | 0.00000  | 0.01136  |
| 36 | C3 | S   | 0.02831  | 0.00000  | 0.00339  | -0.00907 | 0.00000  |
| 37 | C3 | S   | -0.05998 | 0.00000  | -0.00778 | 0.01785  | 0.00000  |
| 38 | C3 | PX  | 0.08458  | 0.00000  | -0.00741 | 0.17297  | 0.00000  |
| 39 | C3 | PY  | -0.03965 | 0.00000  | -0.19147 | 0.10262  | 0.00000  |
| 40 | C3 | PZ  | 0.00000  | 0.19514  | 0.00000  | 0.00000  | 0.05714  |
| 41 | C3 | S   | -0.08891 | 0.00000  | -0.00617 | 0.00576  | 0.00000  |
| 42 | C3 | PX  | 0.02928  | 0.00000  | -0.00657 | 0.10094  | 0.00000  |
| 43 | C3 | PY  | -0.01709 | 0.00000  | -0.05574 | 0.05322  | 0.00000  |
| 44 | C3 | PZ  | 0.00000  | 0.11756  | 0.00000  | 0.00000  | 0.04332  |
| 45 | C3 | DXX | -0.01067 | 0.00000  | -0.00350 | -0.01682 | 0.00000  |
| 46 | C3 | DYY | 0.00981  | 0.00000  | 0.00230  | 0.01664  | 0.00000  |
| 47 | C3 | DZZ | 0.00080  | 0.00000  | 0.00055  | 0.00013  | 0.00000  |
| 48 | C3 | DXY | 0.00436  | 0.00000  | -0.01617 | 0.00526  | 0.00000  |
| 49 | C3 | DXZ | 0.00000  | -0.00500 | 0.00000  | 0.00000  | 0.00283  |
| 50 | C3 | DYZ | 0.00000  | -0.00707 | 0.00000  | 0.00000  | 0.01042  |

|     |    |     |          |          |          |          |          |
|-----|----|-----|----------|----------|----------|----------|----------|
| 51  | C4 | S   | 0.00265  | 0.00000  | 0.00428  | 0.00931  | 0.00000  |
| 52  | C4 | S   | -0.00193 | 0.00000  | -0.00543 | -0.02036 | 0.00000  |
| 53  | C4 | PX  | -0.21685 | 0.00000  | 0.09085  | 0.19138  | 0.00000  |
| 54  | C4 | PY  | -0.14112 | 0.00000  | -0.18845 | 0.08258  | 0.00000  |
| 55  | C4 | PZ  | 0.00000  | 0.08454  | 0.00000  | 0.00000  | 0.25580  |
| 56  | C4 | S   | -0.00716 | 0.00000  | -0.02943 | -0.04693 | 0.00000  |
| 57  | C4 | PX  | -0.09783 | 0.00000  | 0.02840  | 0.09174  | 0.00000  |
| 58  | C4 | PY  | -0.07822 | 0.00000  | -0.08724 | 0.06689  | 0.00000  |
| 59  | C4 | PZ  | 0.00000  | 0.05075  | 0.00000  | 0.00000  | 0.18018  |
| 60  | C4 | DXX | 0.01328  | 0.00000  | -0.00029 | -0.01578 | 0.00000  |
| 61  | C4 | DYY | -0.01359 | 0.00000  | -0.00427 | 0.01573  | 0.00000  |
| 62  | C4 | DZZ | 0.00094  | 0.00000  | 0.00113  | 0.00015  | 0.00000  |
| 63  | C4 | DXY | -0.00936 | 0.00000  | -0.01723 | 0.00539  | 0.00000  |
| 64  | C4 | DXZ | 0.00000  | -0.00033 | 0.00000  | 0.00000  | -0.00165 |
| 65  | C4 | DYZ | 0.00000  | -0.00617 | 0.00000  | 0.00000  | -0.01362 |
| 66  | C5 | S   | -0.00983 | 0.00000  | -0.00128 | 0.00510  | 0.00000  |
| 67  | C5 | S   | 0.02117  | 0.00000  | -0.00246 | -0.01297 | 0.00000  |
| 68  | C5 | PX  | 0.21564  | 0.00000  | -0.06148 | -0.20592 | 0.00000  |
| 69  | C5 | PY  | 0.12382  | 0.00000  | 0.20056  | -0.00885 | 0.00000  |
| 70  | C5 | PZ  | 0.00000  | 0.09004  | 0.00000  | 0.00000  | 0.22646  |
| 71  | C5 | S   | 0.02713  | 0.00000  | 0.01739  | -0.01508 | 0.00000  |
| 72  | C5 | PX  | 0.08291  | 0.00000  | -0.04089 | -0.09978 | 0.00000  |
| 73  | C5 | PY  | 0.05391  | 0.00000  | 0.09943  | 0.00478  | 0.00000  |
| 74  | C5 | PZ  | 0.00000  | 0.05546  | 0.00000  | 0.00000  | 0.15770  |
| 75  | C5 | DXX | 0.01139  | 0.00000  | -0.00595 | -0.01482 | 0.00000  |
| 76  | C5 | DYY | -0.00749 | 0.00000  | 0.01003  | 0.01376  | 0.00000  |
| 77  | C5 | DZZ | -0.00068 | 0.00000  | -0.00135 | -0.00020 | 0.00000  |
| 78  | C5 | DXY | -0.00966 | 0.00000  | -0.01940 | -0.00172 | 0.00000  |
| 79  | C5 | DXZ | 0.00000  | 0.00036  | 0.00000  | 0.00000  | 0.00504  |
| 80  | C5 | DYZ | 0.00000  | -0.00682 | 0.00000  | 0.00000  | -0.01075 |
| 81  | C6 | S   | 0.00356  | 0.00000  | -0.00454 | 0.01715  | 0.00000  |
| 82  | C6 | S   | -0.00613 | 0.00000  | 0.00540  | -0.03986 | 0.00000  |
| 83  | C6 | PX  | -0.15160 | 0.00000  | -0.04462 | -0.19586 | 0.00000  |
| 84  | C6 | PY  | 0.03784  | 0.00000  | 0.23242  | 0.07613  | 0.00000  |
| 85  | C6 | PZ  | 0.00000  | 0.24032  | 0.00000  | 0.00000  | -0.02349 |
| 86  | C6 | S   | -0.01836 | 0.00000  | 0.04079  | -0.02772 | 0.00000  |
| 87  | C6 | PX  | -0.06038 | 0.00000  | -0.04129 | -0.08901 | 0.00000  |
| 88  | C6 | PY  | 0.00422  | 0.00000  | 0.06529  | 0.00960  | 0.00000  |
| 89  | C6 | PZ  | 0.00000  | 0.13965  | 0.00000  | 0.00000  | -0.01787 |
| 90  | C6 | DXX | -0.00395 | 0.00000  | 0.00491  | -0.00749 | 0.00000  |
| 91  | C6 | DYY | 0.00215  | 0.00000  | -0.00378 | 0.00682  | 0.00000  |
| 92  | C6 | DZZ | -0.00030 | 0.00000  | 0.00185  | 0.00043  | 0.00000  |
| 93  | C6 | DXY | -0.00987 | 0.00000  | -0.01398 | 0.00447  | 0.00000  |
| 94  | C6 | DXZ | 0.00000  | 0.00115  | 0.00000  | 0.00000  | 0.00240  |
| 95  | C6 | DYZ | 0.00000  | -0.01304 | 0.00000  | 0.00000  | 0.01697  |
| 96  | C7 | S   | -0.01716 | 0.00000  | -0.01521 | -0.01672 | 0.00000  |
| 97  | C7 | S   | 0.03965  | 0.00000  | 0.03138  | 0.03879  | 0.00000  |
| 98  | C7 | PX  | -0.20006 | 0.00000  | -0.00184 | -0.19425 | 0.00000  |
| 99  | C7 | PY  | -0.02472 | 0.00000  | 0.16704  | -0.05704 | 0.00000  |
| 100 | C7 | PZ  | 0.00000  | 0.15928  | 0.00000  | 0.00000  | -0.04209 |
| 101 | C7 | S   | 0.03062  | 0.00000  | 0.05772  | 0.06857  | 0.00000  |
| 102 | C7 | PX  | -0.08877 | 0.00000  | -0.00303 | -0.11325 | 0.00000  |
| 103 | C7 | PY  | 0.00549  | 0.00000  | 0.06253  | -0.02389 | 0.00000  |
| 104 | C7 | PZ  | 0.00000  | 0.09337  | 0.00000  | 0.00000  | -0.03138 |

|     |    |     |          |          |          |          |          |
|-----|----|-----|----------|----------|----------|----------|----------|
| 105 | C7 | DXX | -0.00031 | 0.00000  | -0.00613 | -0.00443 | 0.00000  |
| 106 | C7 | DYY | 0.00047  | 0.00000  | 0.00464  | 0.00362  | 0.00000  |
| 107 | C7 | DZZ | -0.00050 | 0.00000  | -0.00006 | 0.00027  | 0.00000  |
| 108 | C7 | DXY | 0.01221  | 0.00000  | -0.00732 | 0.01848  | 0.00000  |
| 109 | C7 | DXZ | 0.00000  | -0.01091 | 0.00000  | 0.00000  | 0.00565  |
| 110 | C7 | DYZ | 0.00000  | 0.00748  | 0.00000  | 0.00000  | 0.00604  |
| 111 | H3 | S   | -0.15372 | 0.00000  | -0.10339 | 0.10834  | 0.00000  |
| 112 | H3 | S   | -0.12257 | 0.00000  | -0.09106 | 0.09730  | 0.00000  |
| 113 | H3 | PX  | 0.00148  | 0.00000  | 0.00389  | -0.00034 | 0.00000  |
| 114 | H3 | PY  | 0.00718  | 0.00000  | 0.00229  | -0.00443 | 0.00000  |
| 115 | H3 | PZ  | 0.00000  | 0.00164  | 0.00000  | 0.00000  | 0.00546  |
| 116 | H4 | S   | 0.01319  | 0.00000  | 0.15271  | 0.06630  | 0.00000  |
| 117 | H4 | S   | 0.00868  | 0.00000  | 0.13340  | 0.06095  | 0.00000  |
| 118 | H4 | PX  | 0.00308  | 0.00000  | 0.00390  | -0.00051 | 0.00000  |
| 119 | H4 | PY  | 0.00163  | 0.00000  | -0.00452 | -0.00342 | 0.00000  |
| 120 | H4 | PZ  | 0.00000  | 0.00169  | 0.00000  | 0.00000  | 0.00477  |
| 121 | N1 | S   | 0.02446  | 0.00000  | -0.02256 | -0.02007 | 0.00000  |
| 122 | N1 | S   | -0.05466 | 0.00000  | 0.05164  | 0.04389  | 0.00000  |
| 123 | N1 | PX  | 0.00851  | 0.00000  | -0.11151 | -0.14990 | 0.00000  |
| 124 | N1 | PY  | 0.04498  | 0.00000  | -0.20840 | 0.02951  | 0.00000  |
| 125 | N1 | PZ  | 0.00000  | 0.25471  | 0.00000  | 0.00000  | -0.15802 |
| 126 | N1 | S   | -0.08113 | 0.00000  | 0.07619  | 0.07823  | 0.00000  |
| 127 | N1 | PX  | 0.01248  | 0.00000  | -0.07738 | -0.09635 | 0.00000  |
| 128 | N1 | PY  | 0.01555  | 0.00000  | -0.11727 | 0.00234  | 0.00000  |
| 129 | N1 | PZ  | 0.00000  | 0.16143  | 0.00000  | 0.00000  | -0.11548 |
| 130 | N1 | DXX | 0.00263  | 0.00000  | -0.00460 | -0.00948 | 0.00000  |
| 131 | N1 | DYY | 0.00097  | 0.00000  | -0.00195 | 0.00154  | 0.00000  |
| 132 | N1 | DZZ | -0.00093 | 0.00000  | 0.00383  | 0.00307  | 0.00000  |
| 133 | N1 | DXY | -0.00065 | 0.00000  | -0.01762 | -0.00477 | 0.00000  |
| 134 | N1 | DXZ | 0.00000  | 0.02153  | 0.00000  | 0.00000  | -0.01360 |
| 135 | N1 | DYZ | 0.00000  | 0.01218  | 0.00000  | 0.00000  | -0.00076 |
| 136 | H6 | S   | 0.04970  | 0.00000  | -0.05718 | -0.13294 | 0.00000  |
| 137 | H6 | S   | 0.03908  | 0.00000  | -0.03741 | -0.10872 | 0.00000  |
| 138 | H6 | PX  | 0.00183  | 0.00000  | -0.00259 | -0.00497 | 0.00000  |
| 139 | H6 | PY  | -0.00293 | 0.00000  | -0.00292 | -0.00061 | 0.00000  |
| 140 | H6 | PZ  | 0.00000  | 0.00248  | 0.00000  | 0.00000  | 0.00315  |
| 141 | C8 | S   | -0.01855 | 0.00000  | 0.00869  | -0.01342 | 0.00000  |
| 142 | C8 | S   | 0.03872  | 0.00000  | -0.01937 | 0.02600  | 0.00000  |
| 143 | C8 | PX  | 0.11073  | 0.00000  | -0.10584 | 0.16921  | 0.00000  |
| 144 | C8 | PY  | 0.13116  | 0.00000  | 0.00133  | 0.09508  | 0.00000  |
| 145 | C8 | PZ  | 0.00000  | 0.19254  | 0.00000  | 0.00000  | -0.19895 |
| 146 | C8 | S   | 0.06815  | 0.00000  | -0.02123 | 0.05862  | 0.00000  |
| 147 | C8 | PX  | 0.07272  | 0.00000  | -0.07879 | 0.06991  | 0.00000  |
| 148 | C8 | PY  | 0.02958  | 0.00000  | 0.00064  | 0.00758  | 0.00000  |
| 149 | C8 | PZ  | 0.00000  | 0.11214  | 0.00000  | 0.00000  | -0.13502 |
| 150 | C8 | DXX | 0.00395  | 0.00000  | 0.00541  | 0.00837  | 0.00000  |
| 151 | C8 | DYY | -0.00086 | 0.00000  | -0.00638 | -0.00879 | 0.00000  |
| 152 | C8 | DZZ | -0.00056 | 0.00000  | -0.00032 | 0.00045  | 0.00000  |
| 153 | C8 | DXY | 0.01712  | 0.00000  | -0.00701 | 0.01551  | 0.00000  |
| 154 | C8 | DXZ | 0.00000  | -0.00381 | 0.00000  | 0.00000  | 0.00415  |
| 155 | C8 | DYZ | 0.00000  | 0.00558  | 0.00000  | 0.00000  | 0.00365  |
| 156 | H8 | S   | -0.10085 | 0.00000  | -0.02222 | -0.10413 | 0.00000  |
| 157 | H8 | S   | -0.08221 | 0.00000  | -0.02230 | -0.09943 | 0.00000  |
| 158 | H8 | PX  | 0.00390  | 0.00000  | 0.00162  | 0.00297  | 0.00000  |

|     |     |     |          |         |          |          |          |
|-----|-----|-----|----------|---------|----------|----------|----------|
| 159 | H8  | PY  | -0.00260 | 0.00000 | 0.00176  | -0.00295 | 0.00000  |
| 160 | H8  | PZ  | 0.00000  | 0.00330 | 0.00000  | 0.00000  | -0.00081 |
| 161 | C10 | S   | 0.00350  | 0.00000 | 0.00396  | 0.00948  | 0.00000  |
| 162 | C10 | S   | -0.00739 | 0.00000 | -0.00821 | -0.02022 | 0.00000  |
| 163 | C10 | PX  | -0.19241 | 0.00000 | 0.14582  | -0.07739 | 0.00000  |
| 164 | C10 | PY  | -0.08475 | 0.00000 | -0.02419 | -0.07573 | 0.00000  |
| 165 | C10 | PZ  | 0.00000  | 0.09743 | 0.00000  | 0.00000  | -0.14133 |
| 166 | C10 | S   | -0.01034 | 0.00000 | -0.01650 | -0.04513 | 0.00000  |
| 167 | C10 | PX  | -0.10955 | 0.00000 | 0.08730  | -0.04752 | 0.00000  |
| 168 | C10 | PY  | -0.04444 | 0.00000 | -0.00620 | -0.04258 | 0.00000  |
| 169 | C10 | PZ  | 0.00000  | 0.05719 | 0.00000  | 0.00000  | -0.10163 |
| 170 | C10 | DXX | 0.00637  | 0.00000 | -0.00051 | 0.00480  | 0.00000  |
| 171 | C10 | DYY | -0.00564 | 0.00000 | 0.00131  | -0.00347 | 0.00000  |
| 172 | C10 | DZZ | 0.00015  | 0.00000 | -0.00015 | 0.00025  | 0.00000  |
| 173 | C10 | DXY | 0.01341  | 0.00000 | -0.01258 | 0.00962  | 0.00000  |
| 174 | C10 | DXZ | 0.00000  | 0.00078 | 0.00000  | 0.00000  | -0.00083 |
| 175 | C10 | DYZ | 0.00000  | 0.01065 | 0.00000  | 0.00000  | -0.01250 |
| 176 | H16 | S   | -0.08138 | 0.00000 | 0.09337  | -0.03159 | 0.00000  |
| 177 | H16 | S   | -0.06429 | 0.00000 | 0.08066  | -0.02869 | 0.00000  |
| 178 | H16 | PX  | 0.00177  | 0.00000 | -0.00315 | 0.00017  | 0.00000  |
| 179 | H16 | PY  | -0.00429 | 0.00000 | 0.00273  | -0.00196 | 0.00000  |
| 180 | H16 | PZ  | 0.00000  | 0.00208 | 0.00000  | 0.00000  | -0.00307 |
| 181 | H18 | S   | 0.13603  | 0.00000 | -0.08726 | 0.06799  | 0.00000  |
| 182 | H18 | S   | 0.09760  | 0.00000 | -0.06089 | 0.06597  | 0.00000  |
| 183 | H18 | PX  | 0.00565  | 0.00000 | -0.00360 | 0.00238  | 0.00000  |
| 184 | H18 | PY  | 0.00193  | 0.00000 | -0.00174 | 0.00044  | 0.00000  |
| 185 | H18 | PZ  | 0.00000  | 0.00210 | 0.00000  | 0.00000  | -0.00306 |

|              |           |           |          |          |         |
|--------------|-----------|-----------|----------|----------|---------|
| MO:          | 31        | 32        | 33       | 34       | 35      |
| Eigenvalues: | -0.41260  | -0.39954  | -0.33330 | -0.29083 | 0.03440 |
| (ev):        | -11.22740 | -10.87203 | -9.06956 | -7.91387 | 0.93598 |

|    |    | A   | A        | A        | A        | A        |          |
|----|----|-----|----------|----------|----------|----------|----------|
| 1  | H1 | S   | 0.06571  | 0.00000  | 0.00000  | 0.00000  | 0.00000  |
| 2  | H1 | S   | 0.07175  | 0.00000  | 0.00000  | 0.00000  | 0.00000  |
| 3  | H1 | PX  | -0.00207 | 0.00000  | 0.00000  | 0.00000  | 0.00000  |
| 4  | H1 | PY  | 0.00015  | 0.00000  | 0.00000  | 0.00000  | 0.00000  |
| 5  | H1 | PZ  | 0.00000  | 0.00454  | -0.00020 | -0.00557 | 0.00466  |
| 6  | C1 | S   | 0.00887  | 0.00000  | 0.00000  | 0.00000  | 0.00000  |
| 7  | C1 | S   | -0.02022 | 0.00000  | 0.00000  | 0.00000  | 0.00000  |
| 8  | C1 | PX  | 0.08865  | 0.00000  | 0.00000  | 0.00000  | 0.00000  |
| 9  | C1 | PY  | 0.02576  | 0.00000  | 0.00000  | 0.00000  | 0.00000  |
| 10 | C1 | PZ  | 0.00000  | 0.19553  | -0.01614 | -0.22352 | 0.15014  |
| 11 | C1 | S   | -0.04265 | 0.00000  | 0.00000  | 0.00000  | 0.00000  |
| 12 | C1 | PX  | 0.05610  | 0.00000  | 0.00000  | 0.00000  | 0.00000  |
| 13 | C1 | PY  | 0.03714  | 0.00000  | 0.00000  | 0.00000  | 0.00000  |
| 14 | C1 | PZ  | 0.00000  | 0.14677  | -0.02277 | -0.20082 | 0.21567  |
| 15 | C1 | DXX | 0.01015  | 0.00000  | 0.00000  | 0.00000  | 0.00000  |
| 16 | C1 | DYY | -0.01047 | 0.00000  | 0.00000  | 0.00000  | 0.00000  |
| 17 | C1 | DZZ | -0.00024 | 0.00000  | 0.00000  | 0.00000  | 0.00000  |
| 18 | C1 | DXY | 0.00287  | 0.00000  | 0.00000  | 0.00000  | 0.00000  |
| 19 | C1 | DXZ | 0.00000  | -0.00770 | 0.00135  | 0.00775  | -0.00104 |
| 20 | C1 | DYZ | 0.00000  | -0.00226 | -0.01321 | -0.01687 | -0.01223 |
| 21 | C2 | S   | 0.01846  | 0.00000  | 0.00000  | 0.00000  | 0.00000  |

|    |    |     |          |          |          |          |          |
|----|----|-----|----------|----------|----------|----------|----------|
| 22 | C2 | S   | -0.03742 | 0.00000  | 0.00000  | 0.00000  | 0.00000  |
| 23 | C2 | PX  | -0.08753 | 0.00000  | 0.00000  | 0.00000  | 0.00000  |
| 24 | C2 | PY  | 0.10429  | 0.00000  | 0.00000  | 0.00000  | 0.00000  |
| 25 | C2 | PZ  | 0.00000  | -0.23336 | -0.06465 | 0.22514  | 0.13652  |
| 26 | C2 | S   | -0.10344 | 0.00000  | 0.00000  | 0.00000  | 0.00000  |
| 27 | C2 | PX  | -0.05512 | 0.00000  | 0.00000  | 0.00000  | 0.00000  |
| 28 | C2 | PY  | 0.04402  | 0.00000  | 0.00000  | 0.00000  | 0.00000  |
| 29 | C2 | PZ  | 0.00000  | -0.17535 | -0.06012 | 0.20282  | 0.20857  |
| 30 | C2 | DXX | 0.00905  | 0.00000  | 0.00000  | 0.00000  | 0.00000  |
| 31 | C2 | DYY | -0.00948 | 0.00000  | 0.00000  | 0.00000  | 0.00000  |
| 32 | C2 | DZZ | 0.00064  | 0.00000  | 0.00000  | 0.00000  | 0.00000  |
| 33 | C2 | DXY | 0.00411  | 0.00000  | 0.00000  | 0.00000  | 0.00000  |
| 34 | C2 | DXZ | 0.00000  | -0.01004 | -0.00210 | 0.00776  | 0.00263  |
| 35 | C2 | DYZ | 0.00000  | -0.00319 | -0.01416 | 0.01156  | -0.01480 |
| 36 | C3 | S   | -0.02061 | 0.00000  | 0.00000  | 0.00000  | 0.00000  |
| 37 | C3 | S   | 0.04186  | 0.00000  | 0.00000  | 0.00000  | 0.00000  |
| 38 | C3 | PX  | -0.22022 | 0.00000  | 0.00000  | 0.00000  | 0.00000  |
| 39 | C3 | PY  | 0.00175  | 0.00000  | 0.00000  | 0.00000  | 0.00000  |
| 40 | C3 | PZ  | 0.00000  | 0.21952  | 0.20608  | 0.13945  | 0.12177  |
| 41 | C3 | S   | 0.11754  | 0.00000  | 0.00000  | 0.00000  | 0.00000  |
| 42 | C3 | PX  | -0.11418 | 0.00000  | 0.00000  | 0.00000  | 0.00000  |
| 43 | C3 | PY  | 0.04406  | 0.00000  | 0.00000  | 0.00000  | 0.00000  |
| 44 | C3 | PZ  | 0.00000  | 0.16011  | 0.18065  | 0.13713  | 0.15114  |
| 45 | C3 | DXX | 0.00905  | 0.00000  | 0.00000  | 0.00000  | 0.00000  |
| 46 | C3 | DYY | -0.00628 | 0.00000  | 0.00000  | 0.00000  | 0.00000  |
| 47 | C3 | DZZ | -0.00013 | 0.00000  | 0.00000  | 0.00000  | 0.00000  |
| 48 | C3 | DXY | 0.00046  | 0.00000  | 0.00000  | 0.00000  | 0.00000  |
| 49 | C3 | DXZ | 0.00000  | 0.01200  | -0.00546 | 0.00201  | -0.00757 |
| 50 | C3 | DYZ | 0.00000  | -0.00619 | -0.00757 | -0.02184 | 0.02205  |
| 51 | C4 | S   | 0.00255  | 0.00000  | 0.00000  | 0.00000  | 0.00000  |
| 52 | C4 | S   | -0.00474 | 0.00000  | 0.00000  | 0.00000  | 0.00000  |
| 53 | C4 | PX  | -0.05758 | 0.00000  | 0.00000  | 0.00000  | 0.00000  |
| 54 | C4 | PY  | 0.02256  | 0.00000  | 0.00000  | 0.00000  | 0.00000  |
| 55 | C4 | PZ  | 0.00000  | 0.09067  | -0.13757 | -0.21480 | -0.14883 |
| 56 | C4 | S   | -0.01744 | 0.00000  | 0.00000  | 0.00000  | 0.00000  |
| 57 | C4 | PX  | -0.03743 | 0.00000  | 0.00000  | 0.00000  | 0.00000  |
| 58 | C4 | PY  | 0.01236  | 0.00000  | 0.00000  | 0.00000  | 0.00000  |
| 59 | C4 | PZ  | 0.00000  | 0.07254  | -0.11277 | -0.20805 | -0.19642 |
| 60 | C4 | DXX | 0.00474  | 0.00000  | 0.00000  | 0.00000  | 0.00000  |
| 61 | C4 | DYY | -0.00432 | 0.00000  | 0.00000  | 0.00000  | 0.00000  |
| 62 | C4 | DZZ | -0.00003 | 0.00000  | 0.00000  | 0.00000  | 0.00000  |
| 63 | C4 | DXY | 0.00128  | 0.00000  | 0.00000  | 0.00000  | 0.00000  |
| 64 | C4 | DXZ | 0.00000  | 0.01122  | 0.00504  | -0.01376 | 0.01263  |
| 65 | C4 | DYZ | 0.00000  | -0.00883 | 0.00244  | 0.01220  | -0.00861 |
| 66 | C5 | S   | -0.00528 | 0.00000  | 0.00000  | 0.00000  | 0.00000  |
| 67 | C5 | S   | 0.00762  | 0.00000  | 0.00000  | 0.00000  | 0.00000  |
| 68 | C5 | PX  | 0.04338  | 0.00000  | 0.00000  | 0.00000  | 0.00000  |
| 69 | C5 | PY  | -0.03246 | 0.00000  | 0.00000  | 0.00000  | 0.00000  |
| 70 | C5 | PZ  | 0.00000  | -0.16043 | -0.16691 | 0.15793  | -0.16803 |
| 71 | C5 | S   | 0.03668  | 0.00000  | 0.00000  | 0.00000  | 0.00000  |
| 72 | C5 | PX  | 0.02753  | 0.00000  | 0.00000  | 0.00000  | 0.00000  |
| 73 | C5 | PY  | -0.04794 | 0.00000  | 0.00000  | 0.00000  | 0.00000  |
| 74 | C5 | PZ  | 0.00000  | -0.12586 | -0.13788 | 0.15760  | -0.22436 |
| 75 | C5 | DXX | 0.00518  | 0.00000  | 0.00000  | 0.00000  | 0.00000  |



|     |    |     |          |          |          |          |          |
|-----|----|-----|----------|----------|----------|----------|----------|
| 76  | C5 | DYY | -0.00552 | 0.00000  | 0.00000  | 0.00000  | 0.00000  |
| 77  | C5 | DZZ | -0.00098 | 0.00000  | 0.00000  | 0.00000  | 0.00000  |
| 78  | C5 | DXY | 0.00506  | 0.00000  | 0.00000  | 0.00000  | 0.00000  |
| 79  | C5 | DXZ | 0.00000  | 0.00932  | -0.00284 | -0.01505 | -0.01048 |
| 80  | C5 | DYZ | 0.00000  | 0.01250  | 0.00449  | -0.01316 | -0.00895 |
| 81  | C6 | S   | 0.02069  | 0.00000  | 0.00000  | 0.00000  | 0.00000  |
| 82  | C6 | S   | -0.05790 | 0.00000  | 0.00000  | 0.00000  | 0.00000  |
| 83  | C6 | PX  | 0.18981  | 0.00000  | 0.00000  | 0.00000  | 0.00000  |
| 84  | C6 | PY  | 0.04432  | 0.00000  | 0.00000  | 0.00000  | 0.00000  |
| 85  | C6 | PZ  | 0.00000  | -0.18085 | 0.19332  | -0.05641 | 0.15857  |
| 86  | C6 | S   | 0.03068  | 0.00000  | 0.00000  | 0.00000  | 0.00000  |
| 87  | C6 | PX  | 0.05040  | 0.00000  | 0.00000  | 0.00000  | 0.00000  |
| 88  | C6 | PY  | -0.03691 | 0.00000  | 0.00000  | 0.00000  | 0.00000  |
| 89  | C6 | PZ  | 0.00000  | -0.12806 | 0.15415  | -0.06280 | 0.16019  |
| 90  | C6 | DXX | 0.02499  | 0.00000  | 0.00000  | 0.00000  | 0.00000  |
| 91  | C6 | DYY | -0.02425 | 0.00000  | 0.00000  | 0.00000  | 0.00000  |
| 92  | C6 | DZZ | 0.00184  | 0.00000  | 0.00000  | 0.00000  | 0.00000  |
| 93  | C6 | DXY | 0.02102  | 0.00000  | 0.00000  | 0.00000  | 0.00000  |
| 94  | C6 | DXZ | 0.00000  | 0.01726  | 0.00646  | 0.00858  | 0.00436  |
| 95  | C6 | DYZ | 0.00000  | 0.00447  | -0.00958 | 0.02476  | 0.02188  |
| 96  | C7 | S   | -0.01306 | 0.00000  | 0.00000  | 0.00000  | 0.00000  |
| 97  | C7 | S   | 0.02640  | 0.00000  | 0.00000  | 0.00000  | 0.00000  |
| 98  | C7 | PX  | -0.09657 | 0.00000  | 0.00000  | 0.00000  | 0.00000  |
| 99  | C7 | PY  | -0.11827 | 0.00000  | 0.00000  | 0.00000  | 0.00000  |
| 100 | C7 | PZ  | 0.00000  | 0.22243  | 0.06792  | 0.24861  | -0.23108 |
| 101 | C7 | S   | 0.09656  | 0.00000  | 0.00000  | 0.00000  | 0.00000  |
| 102 | C7 | PX  | -0.05538 | 0.00000  | 0.00000  | 0.00000  | 0.00000  |
| 103 | C7 | PY  | -0.08417 | 0.00000  | 0.00000  | 0.00000  | 0.00000  |
| 104 | C7 | PZ  | 0.00000  | 0.17787  | 0.05418  | 0.22947  | -0.29281 |
| 105 | C7 | DXX | 0.00302  | 0.00000  | 0.00000  | 0.00000  | 0.00000  |
| 106 | C7 | DYY | 0.00025  | 0.00000  | 0.00000  | 0.00000  | 0.00000  |
| 107 | C7 | DZZ | 0.00026  | 0.00000  | 0.00000  | 0.00000  | 0.00000  |
| 108 | C7 | DXY | 0.00002  | 0.00000  | 0.00000  | 0.00000  | 0.00000  |
| 109 | C7 | DXZ | 0.00000  | -0.00739 | 0.00138  | -0.00623 | 0.00492  |
| 110 | C7 | DYZ | 0.00000  | 0.01117  | 0.01905  | 0.00900  | 0.00545  |
| 111 | H3 | S   | -0.00821 | 0.00000  | 0.00000  | 0.00000  | 0.00000  |
| 112 | H3 | S   | -0.00686 | 0.00000  | 0.00000  | 0.00000  | 0.00000  |
| 113 | H3 | PX  | -0.00047 | 0.00000  | 0.00000  | 0.00000  | 0.00000  |
| 114 | H3 | PY  | 0.00042  | 0.00000  | 0.00000  | 0.00000  | 0.00000  |
| 115 | H3 | PZ  | 0.00000  | 0.00205  | -0.00340 | -0.00523 | -0.00534 |
| 116 | H4 | S   | -0.03803 | 0.00000  | 0.00000  | 0.00000  | 0.00000  |
| 117 | H4 | S   | -0.03275 | 0.00000  | 0.00000  | 0.00000  | 0.00000  |
| 118 | H4 | PX  | -0.00031 | 0.00000  | 0.00000  | 0.00000  | 0.00000  |
| 119 | H4 | PY  | 0.00089  | 0.00000  | 0.00000  | 0.00000  | 0.00000  |
| 120 | H4 | PZ  | 0.00000  | -0.00358 | -0.00402 | 0.00370  | -0.00587 |
| 121 | N1 | S   | -0.06370 | 0.00000  | 0.00000  | 0.00000  | 0.00000  |
| 122 | N1 | S   | 0.13749  | 0.00000  | 0.00000  | 0.00000  | 0.00000  |
| 123 | N1 | PX  | -0.45341 | 0.00000  | 0.00000  | 0.00000  | 0.00000  |
| 124 | N1 | PY  | -0.10426 | 0.00000  | 0.00000  | 0.00000  | 0.00000  |
| 125 | N1 | PZ  | 0.00000  | -0.20217 | 0.08992  | -0.27021 | -0.17580 |
| 126 | N1 | S   | 0.24774  | 0.00000  | 0.00000  | 0.00000  | 0.00000  |
| 127 | N1 | PX  | -0.35810 | 0.00000  | 0.00000  | 0.00000  | 0.00000  |
| 128 | N1 | PY  | -0.08874 | 0.00000  | 0.00000  | 0.00000  | 0.00000  |
| 129 | N1 | PZ  | 0.00000  | -0.16244 | 0.08295  | -0.24417 | -0.19485 |

|     |     |     |          |          |          |          |          |
|-----|-----|-----|----------|----------|----------|----------|----------|
| 130 | N1  | DXX | -0.02542 | 0.00000  | 0.00000  | 0.00000  | 0.00000  |
| 131 | N1  | DYY | -0.00297 | 0.00000  | 0.00000  | 0.00000  | 0.00000  |
| 132 | N1  | DZZ | 0.01062  | 0.00000  | 0.00000  | 0.00000  | 0.00000  |
| 133 | N1  | DXY | -0.00376 | 0.00000  | 0.00000  | 0.00000  | 0.00000  |
| 134 | N1  | DXZ | 0.00000  | -0.01086 | 0.00311  | -0.01518 | -0.01141 |
| 135 | N1  | DYZ | 0.00000  | -0.01422 | 0.01795  | -0.00886 | 0.00453  |
| 136 | H6  | S   | 0.05200  | 0.00000  | 0.00000  | 0.00000  | 0.00000  |
| 137 | H6  | S   | 0.07985  | 0.00000  | 0.00000  | 0.00000  | 0.00000  |
| 138 | H6  | PX  | 0.00181  | 0.00000  | 0.00000  | 0.00000  | 0.00000  |
| 139 | H6  | PY  | 0.00063  | 0.00000  | 0.00000  | 0.00000  | 0.00000  |
| 140 | H6  | PZ  | 0.00000  | -0.00526 | -0.00137 | 0.00538  | 0.00395  |
| 141 | C8  | S   | 0.02869  | 0.00000  | 0.00000  | 0.00000  | 0.00000  |
| 142 | C8  | S   | -0.07019 | 0.00000  | 0.00000  | 0.00000  | 0.00000  |
| 143 | C8  | PX  | 0.17716  | 0.00000  | 0.00000  | 0.00000  | 0.00000  |
| 144 | C8  | PY  | -0.05369 | 0.00000  | 0.00000  | 0.00000  | 0.00000  |
| 145 | C8  | PZ  | 0.00000  | 0.06863  | -0.26226 | 0.00570  | -0.08309 |
| 146 | C8  | S   | -0.05674 | 0.00000  | 0.00000  | 0.00000  | 0.00000  |
| 147 | C8  | PX  | 0.02008  | 0.00000  | 0.00000  | 0.00000  | 0.00000  |
| 148 | C8  | PY  | -0.03286 | 0.00000  | 0.00000  | 0.00000  | 0.00000  |
| 149 | C8  | PZ  | 0.00000  | 0.04250  | -0.20817 | -0.00429 | -0.12808 |
| 150 | C8  | DXX | 0.01314  | 0.00000  | 0.00000  | 0.00000  | 0.00000  |
| 151 | C8  | DYY | -0.01763 | 0.00000  | 0.00000  | 0.00000  | 0.00000  |
| 152 | C8  | DZZ | 0.00175  | 0.00000  | 0.00000  | 0.00000  | 0.00000  |
| 153 | C8  | DXY | 0.01688  | 0.00000  | 0.00000  | 0.00000  | 0.00000  |
| 154 | C8  | DXZ | 0.00000  | 0.01431  | -0.00113 | 0.01973  | -0.00260 |
| 155 | C8  | DYZ | 0.00000  | -0.00522 | 0.02647  | -0.00332 | -0.02745 |
| 156 | H8  | S   | -0.01773 | 0.00000  | 0.00000  | 0.00000  | 0.00000  |
| 157 | H8  | S   | -0.02505 | 0.00000  | 0.00000  | 0.00000  | 0.00000  |
| 158 | H8  | PX  | 0.00065  | 0.00000  | 0.00000  | 0.00000  | 0.00000  |
| 159 | H8  | PY  | -0.00278 | 0.00000  | 0.00000  | 0.00000  | 0.00000  |
| 160 | H8  | PZ  | 0.00000  | 0.00515  | 0.00142  | 0.00638  | -0.00793 |
| 161 | C10 | S   | 0.00825  | 0.00000  | 0.00000  | 0.00000  | 0.00000  |
| 162 | C10 | S   | -0.01906 | 0.00000  | 0.00000  | 0.00000  | 0.00000  |
| 163 | C10 | PX  | -0.02188 | 0.00000  | 0.00000  | 0.00000  | 0.00000  |
| 164 | C10 | PY  | -0.02298 | 0.00000  | 0.00000  | 0.00000  | 0.00000  |
| 165 | C10 | PZ  | 0.00000  | 0.06425  | -0.30721 | 0.01696  | 0.26557  |
| 166 | C10 | S   | -0.05537 | 0.00000  | 0.00000  | 0.00000  | 0.00000  |
| 167 | C10 | PX  | 0.00103  | 0.00000  | 0.00000  | 0.00000  | 0.00000  |
| 168 | C10 | PY  | -0.00055 | 0.00000  | 0.00000  | 0.00000  | 0.00000  |
| 169 | C10 | PZ  | 0.00000  | 0.05398  | -0.26954 | 0.01980  | 0.37242  |
| 170 | C10 | DXX | 0.00237  | 0.00000  | 0.00000  | 0.00000  | 0.00000  |
| 171 | C10 | DYY | -0.00065 | 0.00000  | 0.00000  | 0.00000  | 0.00000  |
| 172 | C10 | DZZ | -0.00050 | 0.00000  | 0.00000  | 0.00000  | 0.00000  |
| 173 | C10 | DXY | 0.00832  | 0.00000  | 0.00000  | 0.00000  | 0.00000  |
| 174 | C10 | DXZ | 0.00000  | 0.00195  | -0.00214 | 0.00255  | -0.00001 |
| 175 | C10 | DYZ | 0.00000  | 0.00488  | -0.01979 | 0.00073  | -0.00224 |
| 176 | H16 | S   | -0.01950 | 0.00000  | 0.00000  | 0.00000  | 0.00000  |
| 177 | H16 | S   | -0.01731 | 0.00000  | 0.00000  | 0.00000  | 0.00000  |
| 178 | H16 | PX  | -0.00014 | 0.00000  | 0.00000  | 0.00000  | 0.00000  |
| 179 | H16 | PY  | -0.00024 | 0.00000  | 0.00000  | 0.00000  | 0.00000  |
| 180 | H16 | PZ  | 0.00000  | 0.00165  | -0.00720 | 0.00077  | 0.00862  |
| 181 | H18 | S   | 0.02449  | 0.00000  | 0.00000  | 0.00000  | 0.00000  |
| 182 | H18 | S   | 0.06222  | 0.00000  | 0.00000  | 0.00000  | 0.00000  |
| 183 | H18 | PX  | 0.00012  | 0.00000  | 0.00000  | 0.00000  | 0.00000  |

|     |     |    |         |         |          |          |         |
|-----|-----|----|---------|---------|----------|----------|---------|
| 184 | H18 | PY | 0.00119 | 0.00000 | 0.00000  | 0.00000  | 0.00000 |
| 185 | H18 | PZ | 0.00000 | 0.00109 | -0.00684 | -0.00007 | 0.00838 |

|              |  |         |         |         |         |         |
|--------------|--|---------|---------|---------|---------|---------|
| MO:          |  | 36      | 37      | 38      | 39      | 40      |
| Eigenvalues: |  | 0.17203 | 0.19622 | 0.24449 | 0.26350 | 0.28437 |
| (ev):        |  | 4.68115 | 5.33948 | 6.65287 | 7.17009 | 7.73808 |

|    |    |     | A        | A        | A        | A        | A        |
|----|----|-----|----------|----------|----------|----------|----------|
| 1  | H1 | S   | 0.00000  | 0.00000  | -0.03010 | 0.00068  | 0.00000  |
| 2  | H1 | S   | 0.00000  | 0.00000  | -0.94876 | -0.58727 | 0.00000  |
| 3  | H1 | PX  | 0.00000  | 0.00000  | 0.00101  | 0.00327  | 0.00000  |
| 4  | H1 | PY  | 0.00000  | 0.00000  | 0.00147  | 0.00243  | 0.00000  |
| 5  | H1 | PZ  | 0.01169  | 0.00436  | 0.00000  | 0.00000  | 0.00356  |
| 6  | C1 | S   | 0.00000  | 0.00000  | -0.04148 | -0.01226 | 0.00000  |
| 7  | C1 | S   | 0.00000  | 0.00000  | 0.05493  | -0.00284 | 0.00000  |
| 8  | C1 | PX  | 0.00000  | 0.00000  | 0.12054  | 0.08192  | 0.00000  |
| 9  | C1 | PY  | 0.00000  | 0.00000  | 0.01037  | 0.02457  | 0.00000  |
| 10 | C1 | PZ  | 0.26841  | 0.10644  | 0.00000  | 0.00000  | 0.05096  |
| 11 | C1 | S   | 0.00000  | 0.00000  | 0.65003  | 0.44337  | 0.00000  |
| 12 | C1 | PX  | 0.00000  | 0.00000  | 0.44568  | 0.37706  | 0.00000  |
| 13 | C1 | PY  | 0.00000  | 0.00000  | -0.09971 | -0.04016 | 0.00000  |
| 14 | C1 | PZ  | 0.51787  | 0.20165  | 0.00000  | 0.00000  | 0.20857  |
| 15 | C1 | DXX | 0.00000  | 0.00000  | -0.01538 | -0.00116 | 0.00000  |
| 16 | C1 | DYY | 0.00000  | 0.00000  | 0.00981  | 0.00426  | 0.00000  |
| 17 | C1 | DZZ | 0.00000  | 0.00000  | 0.00026  | -0.00341 | 0.00000  |
| 18 | C1 | DXY | 0.00000  | 0.00000  | 0.00283  | 0.00034  | 0.00000  |
| 19 | C1 | DXZ | 0.01067  | 0.00249  | 0.00000  | 0.00000  | 0.00846  |
| 20 | C1 | DYZ | 0.00181  | -0.03054 | 0.00000  | 0.00000  | 0.00404  |
| 21 | C2 | S   | 0.00000  | 0.00000  | -0.03163 | 0.01228  | 0.00000  |
| 22 | C2 | S   | 0.00000  | 0.00000  | 0.04481  | -0.01915 | 0.00000  |
| 23 | C2 | PX  | 0.00000  | 0.00000  | -0.09046 | 0.02996  | 0.00000  |
| 24 | C2 | PY  | 0.00000  | 0.00000  | 0.01086  | 0.01322  | 0.00000  |
| 25 | C2 | PZ  | 0.26196  | -0.11263 | 0.00000  | 0.00000  | 0.04203  |
| 26 | C2 | S   | 0.00000  | 0.00000  | 0.42495  | -0.16914 | 0.00000  |
| 27 | C2 | PX  | 0.00000  | 0.00000  | -0.34087 | 0.25974  | 0.00000  |
| 28 | C2 | PY  | 0.00000  | 0.00000  | -0.23129 | 0.18440  | 0.00000  |
| 29 | C2 | PZ  | 0.48937  | -0.22077 | 0.00000  | 0.00000  | 0.14706  |
| 30 | C2 | DXX | 0.00000  | 0.00000  | -0.01616 | 0.00724  | 0.00000  |
| 31 | C2 | DYY | 0.00000  | 0.00000  | 0.01062  | -0.00524 | 0.00000  |
| 32 | C2 | DZZ | 0.00000  | 0.00000  | 0.00094  | 0.00010  | 0.00000  |
| 33 | C2 | DXY | 0.00000  | 0.00000  | -0.00546 | -0.00402 | 0.00000  |
| 34 | C2 | DXZ | -0.00993 | 0.00000  | 0.00000  | 0.00000  | -0.00783 |
| 35 | C2 | DYZ | 0.00264  | 0.03060  | 0.00000  | 0.00000  | 0.00435  |
| 36 | C3 | S   | 0.00000  | 0.00000  | -0.01492 | 0.01377  | 0.00000  |
| 37 | C3 | S   | 0.00000  | 0.00000  | 0.03500  | -0.04435 | 0.00000  |
| 38 | C3 | PX  | 0.00000  | 0.00000  | 0.00058  | 0.03641  | 0.00000  |
| 39 | C3 | PY  | 0.00000  | 0.00000  | -0.00421 | 0.04455  | 0.00000  |
| 40 | C3 | PZ  | -0.17069 | 0.21221  | 0.00000  | 0.00000  | -0.10214 |
| 41 | C3 | S   | 0.00000  | 0.00000  | 0.04757  | 0.33499  | 0.00000  |
| 42 | C3 | PX  | 0.00000  | 0.00000  | -0.04112 | -0.39441 | 0.00000  |
| 43 | C3 | PY  | 0.00000  | 0.00000  | -0.03003 | -0.10454 | 0.00000  |
| 44 | C3 | PZ  | -0.30203 | 0.41076  | 0.00000  | 0.00000  | -0.33004 |
| 45 | C3 | DXX | 0.00000  | 0.00000  | 0.00639  | 0.01384  | 0.00000  |
| 46 | C3 | DYY | 0.00000  | 0.00000  | -0.01053 | -0.00845 | 0.00000  |

|     |    |     |          |          |          |          |          |
|-----|----|-----|----------|----------|----------|----------|----------|
| 47  | C3 | DZZ | 0.00000  | 0.00000  | 0.00254  | -0.00073 | 0.00000  |
| 48  | C3 | DXY | 0.00000  | 0.00000  | 0.01319  | -0.00908 | 0.00000  |
| 49  | C3 | DXZ | 0.02012  | 0.01384  | 0.00000  | 0.00000  | 0.02455  |
| 50  | C3 | DYZ | 0.00996  | 0.01399  | 0.00000  | 0.00000  | -0.01056 |
| 51  | C4 | S   | 0.00000  | 0.00000  | -0.04527 | -0.00636 | 0.00000  |
| 52  | C4 | S   | 0.00000  | 0.00000  | 0.04531  | -0.00040 | 0.00000  |
| 53  | C4 | PX  | 0.00000  | 0.00000  | 0.06267  | 0.02210  | 0.00000  |
| 54  | C4 | PY  | 0.00000  | 0.00000  | 0.15492  | 0.04076  | 0.00000  |
| 55  | C4 | PZ  | -0.14126 | -0.26377 | 0.00000  | 0.00000  | -0.00683 |
| 56  | C4 | S   | 0.00000  | 0.00000  | 0.93033  | 0.25155  | 0.00000  |
| 57  | C4 | PX  | 0.00000  | 0.00000  | 0.21689  | 0.00240  | 0.00000  |
| 58  | C4 | PY  | 0.00000  | 0.00000  | 0.45521  | 0.08515  | 0.00000  |
| 59  | C4 | PZ  | -0.30732 | -0.53076 | 0.00000  | 0.00000  | -0.09599 |
| 60  | C4 | DXX | 0.00000  | 0.00000  | 0.00698  | 0.00395  | 0.00000  |
| 61  | C4 | DYY | 0.00000  | 0.00000  | -0.00913 | -0.00362 | 0.00000  |
| 62  | C4 | DZZ | 0.00000  | 0.00000  | -0.00199 | -0.00099 | 0.00000  |
| 63  | C4 | DXY | 0.00000  | 0.00000  | -0.01537 | -0.00052 | 0.00000  |
| 64  | C4 | DXZ | 0.02152  | -0.01403 | 0.00000  | 0.00000  | 0.00431  |
| 65  | C4 | DYZ | -0.01436 | -0.00503 | 0.00000  | 0.00000  | -0.00041 |
| 66  | C5 | S   | 0.00000  | 0.00000  | -0.04611 | 0.00334  | 0.00000  |
| 67  | C5 | S   | 0.00000  | 0.00000  | 0.04953  | -0.00155 | 0.00000  |
| 68  | C5 | PX  | 0.00000  | 0.00000  | -0.07073 | 0.02378  | 0.00000  |
| 69  | C5 | PY  | 0.00000  | 0.00000  | 0.14039  | 0.00743  | 0.00000  |
| 70  | C5 | PZ  | -0.12642 | 0.27287  | 0.00000  | 0.00000  | 0.01416  |
| 71  | C5 | S   | 0.00000  | 0.00000  | 0.93920  | -0.25890 | 0.00000  |
| 72  | C5 | PX  | 0.00000  | 0.00000  | -0.34876 | 0.03922  | 0.00000  |
| 73  | C5 | PY  | 0.00000  | 0.00000  | 0.36817  | 0.02304  | 0.00000  |
| 74  | C5 | PZ  | -0.27144 | 0.54337  | 0.00000  | 0.00000  | -0.03630 |
| 75  | C5 | DXX | 0.00000  | 0.00000  | 0.00330  | -0.00258 | 0.00000  |
| 76  | C5 | DYY | 0.00000  | 0.00000  | -0.00560 | -0.00029 | 0.00000  |
| 77  | C5 | DZZ | 0.00000  | 0.00000  | -0.00190 | 0.00011  | 0.00000  |
| 78  | C5 | DXY | 0.00000  | 0.00000  | 0.01758  | 0.00089  | 0.00000  |
| 79  | C5 | DXZ | -0.02119 | -0.01351 | 0.00000  | 0.00000  | -0.00523 |
| 80  | C5 | DYZ | -0.01618 | 0.00424  | 0.00000  | 0.00000  | -0.00048 |
| 81  | C6 | S   | 0.00000  | 0.00000  | -0.01711 | -0.00981 | 0.00000  |
| 82  | C6 | S   | 0.00000  | 0.00000  | 0.04079  | 0.03398  | 0.00000  |
| 83  | C6 | PX  | 0.00000  | 0.00000  | 0.00547  | 0.06968  | 0.00000  |
| 84  | C6 | PY  | 0.00000  | 0.00000  | 0.00365  | 0.03766  | 0.00000  |
| 85  | C6 | PZ  | -0.17964 | -0.22291 | 0.00000  | 0.00000  | -0.08669 |
| 86  | C6 | S   | 0.00000  | 0.00000  | -0.06201 | -0.14026 | 0.00000  |
| 87  | C6 | PX  | 0.00000  | 0.00000  | 0.16129  | -0.17398 | 0.00000  |
| 88  | C6 | PY  | 0.00000  | 0.00000  | 0.05871  | 0.01192  | 0.00000  |
| 89  | C6 | PZ  | -0.28144 | -0.39166 | 0.00000  | 0.00000  | -0.24812 |
| 90  | C6 | DXX | 0.00000  | 0.00000  | 0.00658  | -0.01428 | 0.00000  |
| 91  | C6 | DYY | 0.00000  | 0.00000  | -0.01692 | 0.00876  | 0.00000  |
| 92  | C6 | DZZ | 0.00000  | 0.00000  | 0.00419  | 0.00329  | 0.00000  |
| 93  | C6 | DXY | 0.00000  | 0.00000  | -0.01278 | 0.00722  | 0.00000  |
| 94  | C6 | DXZ | -0.02003 | 0.01134  | 0.00000  | 0.00000  | -0.02534 |
| 95  | C6 | DYZ | 0.00715  | -0.01579 | 0.00000  | 0.00000  | -0.01478 |
| 96  | C7 | S   | 0.00000  | 0.00000  | 0.00748  | -0.05180 | 0.00000  |
| 97  | C7 | S   | 0.00000  | 0.00000  | -0.03081 | 0.07741  | 0.00000  |
| 98  | C7 | PX  | 0.00000  | 0.00000  | 0.00183  | 0.17642  | 0.00000  |
| 99  | C7 | PY  | 0.00000  | 0.00000  | -0.04414 | -0.06416 | 0.00000  |
| 100 | C7 | PZ  | 0.05473  | -0.16151 | 0.00000  | 0.00000  | 0.22002  |

|     |    |     |          |          |          |          |          |
|-----|----|-----|----------|----------|----------|----------|----------|
| 101 | C7 | S   | 0.00000  | 0.00000  | 0.07783  | 0.75253  | 0.00000  |
| 102 | C7 | PX  | 0.00000  | 0.00000  | -0.09838 | 1.16302  | 0.00000  |
| 103 | C7 | PY  | 0.00000  | 0.00000  | -0.16560 | -0.24931 | 0.00000  |
| 104 | C7 | PZ  | 0.13353  | -0.33716 | 0.00000  | 0.00000  | 0.64657  |
| 105 | C7 | DXX | 0.00000  | 0.00000  | 0.00003  | -0.00194 | 0.00000  |
| 106 | C7 | DYY | 0.00000  | 0.00000  | 0.00517  | -0.00149 | 0.00000  |
| 107 | C7 | DZZ | 0.00000  | 0.00000  | -0.00257 | 0.00011  | 0.00000  |
| 108 | C7 | DXY | 0.00000  | 0.00000  | -0.00268 | 0.00528  | 0.00000  |
| 109 | C7 | DXZ | -0.00123 | 0.00065  | 0.00000  | 0.00000  | 0.02833  |
| 110 | C7 | DYZ | -0.01543 | 0.01618  | 0.00000  | 0.00000  | 0.00822  |
| 111 | H3 | S   | 0.00000  | 0.00000  | -0.03340 | -0.00752 | 0.00000  |
| 112 | H3 | S   | 0.00000  | 0.00000  | -1.16585 | -0.25400 | 0.00000  |
| 113 | H3 | PX  | 0.00000  | 0.00000  | 0.00046  | 0.00087  | 0.00000  |
| 114 | H3 | PY  | 0.00000  | 0.00000  | 0.00213  | 0.00035  | 0.00000  |
| 115 | H3 | PZ  | -0.00584 | -0.01161 | 0.00000  | 0.00000  | 0.00001  |
| 116 | H4 | S   | 0.00000  | 0.00000  | -0.03575 | -0.00049 | 0.00000  |
| 117 | H4 | S   | 0.00000  | 0.00000  | -1.14216 | 0.07585  | 0.00000  |
| 118 | H4 | PX  | 0.00000  | 0.00000  | 0.00049  | 0.00091  | 0.00000  |
| 119 | H4 | PY  | 0.00000  | 0.00000  | 0.00259  | -0.00103 | 0.00000  |
| 120 | H4 | PZ  | -0.00527 | 0.01185  | 0.00000  | 0.00000  | 0.00094  |
| 121 | N1 | S   | 0.00000  | 0.00000  | 0.00525  | -0.01629 | 0.00000  |
| 122 | N1 | S   | 0.00000  | 0.00000  | -0.03111 | 0.06533  | 0.00000  |
| 123 | N1 | PX  | 0.00000  | 0.00000  | -0.01240 | 0.03128  | 0.00000  |
| 124 | N1 | PY  | 0.00000  | 0.00000  | -0.04365 | -0.03131 | 0.00000  |
| 125 | N1 | PZ  | 0.04739  | 0.18189  | 0.00000  | 0.00000  | 0.24716  |
| 126 | N1 | S   | 0.00000  | 0.00000  | 0.10210  | -0.11950 | 0.00000  |
| 127 | N1 | PX  | 0.00000  | 0.00000  | 0.01666  | -0.00917 | 0.00000  |
| 128 | N1 | PY  | 0.00000  | 0.00000  | 0.01878  | -0.01871 | 0.00000  |
| 129 | N1 | PZ  | 0.08609  | 0.28939  | 0.00000  | 0.00000  | 0.50240  |
| 130 | N1 | DXX | 0.00000  | 0.00000  | -0.00530 | 0.00422  | 0.00000  |
| 131 | N1 | DYY | 0.00000  | 0.00000  | 0.00475  | -0.00454 | 0.00000  |
| 132 | N1 | DZZ | 0.00000  | 0.00000  | -0.00459 | 0.00914  | 0.00000  |
| 133 | N1 | DXY | 0.00000  | 0.00000  | 0.00216  | 0.00450  | 0.00000  |
| 134 | N1 | DXZ | 0.00346  | 0.00820  | 0.00000  | 0.00000  | -0.00880 |
| 135 | N1 | DYZ | -0.01225 | -0.01202 | 0.00000  | 0.00000  | 0.01465  |
| 136 | H6 | S   | 0.00000  | 0.00000  | -0.03185 | 0.02282  | 0.00000  |
| 137 | H6 | S   | 0.00000  | 0.00000  | -0.72120 | 0.37490  | 0.00000  |
| 138 | H6 | PX  | 0.00000  | 0.00000  | -0.00014 | 0.00083  | 0.00000  |
| 139 | H6 | PY  | 0.00000  | 0.00000  | 0.00232  | 0.00021  | 0.00000  |
| 140 | H6 | PZ  | 0.01111  | -0.00459 | 0.00000  | 0.00000  | 0.00290  |
| 141 | C8 | S   | 0.00000  | 0.00000  | 0.00592  | 0.00830  | 0.00000  |
| 142 | C8 | S   | 0.00000  | 0.00000  | -0.00159 | -0.03694 | 0.00000  |
| 143 | C8 | PX  | 0.00000  | 0.00000  | -0.01060 | 0.03977  | 0.00000  |
| 144 | C8 | PY  | 0.00000  | 0.00000  | -0.01295 | -0.00567 | 0.00000  |
| 145 | C8 | PZ  | 0.18415  | 0.00596  | 0.00000  | 0.00000  | -0.39716 |
| 146 | C8 | S   | 0.00000  | 0.00000  | -0.19966 | 0.46109  | 0.00000  |
| 147 | C8 | PX  | 0.00000  | 0.00000  | -0.10987 | -0.03690 | 0.00000  |
| 148 | C8 | PY  | 0.00000  | 0.00000  | -0.10665 | 0.33345  | 0.00000  |
| 149 | C8 | PZ  | 0.25589  | 0.02083  | 0.00000  | 0.00000  | -0.88173 |
| 150 | C8 | DXX | 0.00000  | 0.00000  | 0.00254  | 0.00938  | 0.00000  |
| 151 | C8 | DYY | 0.00000  | 0.00000  | -0.00583 | 0.00012  | 0.00000  |
| 152 | C8 | DZZ | 0.00000  | 0.00000  | 0.00068  | -0.00168 | 0.00000  |
| 153 | C8 | DXY | 0.00000  | 0.00000  | -0.00040 | -0.01096 | 0.00000  |
| 154 | C8 | DXZ | 0.00157  | -0.02191 | 0.00000  | 0.00000  | -0.00327 |

|     |     |     |          |          |          |          |          |
|-----|-----|-----|----------|----------|----------|----------|----------|
| 155 | C8  | DYZ | 0.00926  | 0.00114  | 0.00000  | 0.00000  | -0.00096 |
| 156 | H8  | S   | 0.00000  | 0.00000  | 0.00909  | 0.00182  | 0.00000  |
| 157 | H8  | S   | 0.00000  | 0.00000  | 0.02025  | -1.66394 | 0.00000  |
| 158 | H8  | PX  | 0.00000  | 0.00000  | -0.00019 | 0.00712  | 0.00000  |
| 159 | H8  | PY  | 0.00000  | 0.00000  | -0.00338 | 0.00046  | 0.00000  |
| 160 | H8  | PZ  | 0.00271  | -0.00762 | 0.00000  | 0.00000  | 0.01494  |
| 161 | C10 | S   | 0.00000  | 0.00000  | 0.01620  | -0.07055 | 0.00000  |
| 162 | C10 | S   | 0.00000  | 0.00000  | -0.02342 | 0.07396  | 0.00000  |
| 163 | C10 | PX  | 0.00000  | 0.00000  | -0.01004 | 0.09134  | 0.00000  |
| 164 | C10 | PY  | 0.00000  | 0.00000  | 0.01628  | -0.13550 | 0.00000  |
| 165 | C10 | PZ  | -0.17567 | 0.00443  | 0.00000  | 0.00000  | 0.15246  |
| 166 | C10 | S   | 0.00000  | 0.00000  | -0.27800 | 1.35203  | 0.00000  |
| 167 | C10 | PX  | 0.00000  | 0.00000  | 0.00490  | 0.37851  | 0.00000  |
| 168 | C10 | PY  | 0.00000  | 0.00000  | 0.09909  | -0.53963 | 0.00000  |
| 169 | C10 | PZ  | -0.32249 | -0.00444 | 0.00000  | 0.00000  | 0.60364  |
| 170 | C10 | DXX | 0.00000  | 0.00000  | 0.00117  | -0.00188 | 0.00000  |
| 171 | C10 | DYY | 0.00000  | 0.00000  | 0.00065  | -0.00058 | 0.00000  |
| 172 | C10 | DZZ | 0.00000  | 0.00000  | 0.00006  | -0.00553 | 0.00000  |
| 173 | C10 | DXY | 0.00000  | 0.00000  | 0.00030  | 0.00264  | 0.00000  |
| 174 | C10 | DXZ | 0.00066  | -0.00511 | 0.00000  | 0.00000  | -0.00091 |
| 175 | C10 | DYZ | 0.01287  | 0.00050  | 0.00000  | 0.00000  | -0.03100 |
| 176 | H16 | S   | 0.00000  | 0.00000  | 0.00255  | -0.01071 | 0.00000  |
| 177 | H16 | S   | 0.00000  | 0.00000  | 0.21027  | -1.38758 | 0.00000  |
| 178 | H16 | PX  | 0.00000  | 0.00000  | 0.00002  | 0.00046  | 0.00000  |
| 179 | H16 | PY  | 0.00000  | 0.00000  | 0.00088  | -0.00607 | 0.00000  |
| 180 | H16 | PZ  | -0.00779 | -0.00071 | 0.00000  | 0.00000  | 0.01053  |
| 181 | H18 | S   | 0.00000  | 0.00000  | 0.00466  | -0.01850 | 0.00000  |
| 182 | H18 | S   | 0.00000  | 0.00000  | 0.15677  | -0.48527 | 0.00000  |
| 183 | H18 | PX  | 0.00000  | 0.00000  | 0.00010  | -0.00008 | 0.00000  |
| 184 | H18 | PY  | 0.00000  | 0.00000  | 0.00078  | -0.00263 | 0.00000  |
| 185 | H18 | PZ  | -0.00750 | 0.00111  | 0.00000  | 0.00000  | 0.00927  |

|              |         |         |         |         |         |
|--------------|---------|---------|---------|---------|---------|
| MO:          | 41      | 42      | 43      | 44      | 45      |
| Eigenvalues: | 0.28500 | 0.30257 | 0.30727 | 0.32265 | 0.33518 |
| (ev):        | 7.75532 | 8.23342 | 8.36138 | 8.77967 | 9.12063 |

|    |    | A   | A        | A        | A        | A        |          |
|----|----|-----|----------|----------|----------|----------|----------|
| 1  | H1 | S   | 0.00799  | 0.00866  | -0.03099 | -0.00037 | -0.03005 |
| 2  | H1 | S   | 1.17798  | 0.99575  | 0.44056  | 1.23137  | -0.56069 |
| 3  | H1 | PX  | -0.00475 | -0.00306 | -0.00441 | -0.00508 | -0.00169 |
| 4  | H1 | PY  | 0.00154  | 0.00169  | -0.00192 | 0.00305  | 0.00326  |
| 5  | H1 | PZ  | 0.00000  | 0.00000  | 0.00000  | 0.00000  | 0.00000  |
| 6  | C1 | S   | 0.03540  | 0.04276  | 0.02824  | 0.06147  | -0.02673 |
| 7  | C1 | S   | -0.02874 | -0.05267 | -0.05562 | -0.09565 | 0.04213  |
| 8  | C1 | PX  | -0.15265 | -0.10217 | -0.01008 | -0.08987 | 0.03722  |
| 9  | C1 | PY  | -0.00557 | 0.03632  | 0.00883  | 0.01148  | 0.02527  |
| 10 | C1 | PZ  | 0.00000  | 0.00000  | 0.00000  | 0.00000  | 0.00000  |
| 11 | C1 | S   | -0.83763 | -0.78626 | -0.40716 | -0.96621 | 0.02162  |
| 12 | C1 | PX  | -0.67752 | -0.59581 | -0.29920 | -0.69891 | 0.40215  |
| 13 | C1 | PY  | -0.14190 | 0.13193  | -0.53840 | -0.32873 | 0.31442  |
| 14 | C1 | PZ  | 0.00000  | 0.00000  | 0.00000  | 0.00000  | 0.00000  |
| 15 | C1 | DXX | 0.00191  | 0.00073  | -0.01292 | -0.00805 | -0.00867 |
| 16 | C1 | DYY | -0.00217 | 0.00213  | 0.01092  | 0.01001  | -0.00079 |
| 17 | C1 | DZZ | 0.00305  | -0.00021 | -0.00076 | -0.00160 | -0.00152 |

|    |    |     |          |          |          |          |          |
|----|----|-----|----------|----------|----------|----------|----------|
| 18 | C1 | DXY | 0.00477  | 0.00129  | -0.00450 | 0.00460  | 0.00741  |
| 19 | C1 | DXZ | 0.00000  | 0.00000  | 0.00000  | 0.00000  | 0.00000  |
| 20 | C1 | DYZ | 0.00000  | 0.00000  | 0.00000  | 0.00000  | 0.00000  |
| 21 | C2 | S   | -0.02702 | -0.02619 | 0.01725  | 0.06256  | 0.05613  |
| 22 | C2 | S   | 0.02331  | 0.02096  | 0.00198  | -0.09402 | -0.08054 |
| 23 | C2 | PX  | -0.12607 | -0.10579 | 0.08517  | 0.08277  | 0.11007  |
| 24 | C2 | PY  | -0.00589 | -0.01663 | -0.00227 | 0.03404  | -0.03648 |
| 25 | C2 | PZ  | 0.00000  | 0.00000  | 0.00000  | 0.00000  | 0.00000  |
| 26 | C2 | S   | 0.57893  | 0.61987  | -0.59769 | -1.06597 | -0.58610 |
| 27 | C2 | PX  | -0.56078 | -0.49113 | 0.20803  | 0.76586  | 0.98185  |
| 28 | C2 | PY  | -0.26313 | -0.05574 | 0.01595  | 0.01985  | -0.40606 |
| 29 | C2 | PZ  | 0.00000  | 0.00000  | 0.00000  | 0.00000  | 0.00000  |
| 30 | C2 | DXX | -0.00960 | 0.00008  | 0.00016  | -0.00615 | 0.00092  |
| 31 | C2 | DYY | 0.00828  | -0.00009 | -0.00411 | 0.00632  | 0.00597  |
| 32 | C2 | DZZ | -0.00183 | -0.00133 | 0.00287  | -0.00156 | 0.00173  |
| 33 | C2 | DXY | -0.00068 | -0.00252 | -0.00574 | -0.00821 | 0.00778  |
| 34 | C2 | DXZ | 0.00000  | 0.00000  | 0.00000  | 0.00000  | 0.00000  |
| 35 | C2 | DYZ | 0.00000  | 0.00000  | 0.00000  | 0.00000  | 0.00000  |
| 36 | C3 | S   | -0.00572 | -0.00822 | 0.00809  | -0.00236 | -0.00847 |
| 37 | C3 | S   | 0.04237  | 0.02915  | 0.02856  | -0.01607 | -0.00717 |
| 38 | C3 | PX  | -0.08107 | 0.03135  | 0.04570  | 0.04318  | 0.02018  |
| 39 | C3 | PY  | 0.04875  | 0.02880  | -0.00942 | 0.09957  | -0.00697 |
| 40 | C3 | PZ  | 0.00000  | 0.00000  | 0.00000  | 0.00000  | 0.00000  |
| 41 | C3 | S   | -0.61084 | 0.01899  | -1.10983 | 0.00024  | 0.57414  |
| 42 | C3 | PX  | -0.00101 | 0.41837  | 0.16011  | -0.18569 | 0.11586  |
| 43 | C3 | PY  | 0.19964  | -0.12814 | 0.16273  | -0.06444 | 0.02935  |
| 44 | C3 | PZ  | 0.00000  | 0.00000  | 0.00000  | 0.00000  | 0.00000  |
| 45 | C3 | DXX | -0.01179 | -0.00156 | 0.00749  | 0.00372  | 0.00033  |
| 46 | C3 | DYY | 0.00421  | -0.00356 | -0.02218 | -0.00976 | 0.00840  |
| 47 | C3 | DZZ | 0.00387  | 0.00342  | 0.00268  | 0.00055  | -0.00273 |
| 48 | C3 | DXY | 0.00299  | -0.01321 | -0.00085 | -0.01833 | 0.00029  |
| 49 | C3 | DXZ | 0.00000  | 0.00000  | 0.00000  | 0.00000  | 0.00000  |
| 50 | C3 | DYZ | 0.00000  | 0.00000  | 0.00000  | 0.00000  | 0.00000  |
| 51 | C4 | S   | 0.00381  | 0.00864  | -0.06001 | -0.04267 | 0.07438  |
| 52 | C4 | S   | 0.00790  | 0.01060  | 0.06702  | 0.03234  | -0.10474 |
| 53 | C4 | PX  | -0.02800 | -0.02206 | 0.06570  | 0.05630  | 0.04867  |
| 54 | C4 | PY  | -0.02871 | -0.05888 | 0.07736  | 0.08485  | -0.06997 |
| 55 | C4 | PZ  | 0.00000  | 0.00000  | 0.00000  | 0.00000  | 0.00000  |
| 56 | C4 | S   | -0.20762 | -0.52045 | 1.23326  | 0.99372  | -0.96099 |
| 57 | C4 | PX  | 0.24482  | 0.14788  | 0.51336  | 0.52878  | -0.08331 |
| 58 | C4 | PY  | -0.12100 | -0.20440 | 0.56097  | 0.38507  | -0.80207 |
| 59 | C4 | PZ  | 0.00000  | 0.00000  | 0.00000  | 0.00000  | 0.00000  |
| 60 | C4 | DXX | -0.00675 | -0.00293 | -0.00086 | 0.00173  | 0.01666  |
| 61 | C4 | DYY | 0.00584  | -0.00079 | 0.00337  | 0.00272  | -0.00847 |
| 62 | C4 | DZZ | 0.00114  | 0.00191  | -0.00270 | -0.00459 | -0.00068 |
| 63 | C4 | DXY | -0.00292 | -0.00232 | 0.00303  | 0.00815  | -0.00435 |
| 64 | C4 | DXZ | 0.00000  | 0.00000  | 0.00000  | 0.00000  | 0.00000  |
| 65 | C4 | DYZ | 0.00000  | 0.00000  | 0.00000  | 0.00000  | 0.00000  |
| 66 | C5 | S   | -0.02905 | -0.01341 | 0.02101  | -0.02621 | -0.09455 |
| 67 | C5 | S   | 0.01073  | -0.00638 | -0.04052 | 0.01494  | 0.12020  |
| 68 | C5 | PX  | -0.08554 | -0.02802 | -0.01063 | -0.06617 | -0.00075 |
| 69 | C5 | PY  | 0.09442  | 0.07861  | -0.01870 | 0.06119  | 0.10652  |
| 70 | C5 | PZ  | 0.00000  | 0.00000  | 0.00000  | 0.00000  | 0.00000  |

|     |    |     |          |          |          |          |          |
|-----|----|-----|----------|----------|----------|----------|----------|
| 71  | C5 | S   | 0.99007  | 0.55696  | -0.08919 | 0.58773  | 1.39400  |
| 72  | C5 | PX  | -0.14185 | 0.08983  | -0.06111 | -0.46232 | -0.45414 |
| 73  | C5 | PY  | 0.36353  | 0.28858  | -0.30672 | 0.24852  | 0.96058  |
| 74  | C5 | PZ  | 0.00000  | 0.00000  | 0.00000  | 0.00000  | 0.00000  |
| 75  | C5 | DXX | 0.00866  | 0.00584  | 0.00278  | 0.00537  | -0.01570 |
| 76  | C5 | DYY | -0.00259 | -0.00238 | 0.00274  | -0.00149 | 0.00884  |
| 77  | C5 | DZZ | -0.00360 | -0.00259 | -0.00190 | -0.00431 | -0.00175 |
| 78  | C5 | DXY | 0.00007  | -0.00271 | -0.00048 | -0.00661 | -0.01199 |
| 79  | C5 | DXZ | 0.00000  | 0.00000  | 0.00000  | 0.00000  | 0.00000  |
| 80  | C5 | DYZ | 0.00000  | 0.00000  | 0.00000  | 0.00000  | 0.00000  |
| 81  | C6 | S   | 0.01593  | -0.00646 | -0.00535 | -0.02255 | 0.00531  |
| 82  | C6 | S   | -0.04478 | -0.00393 | -0.01803 | 0.04251  | 0.00166  |
| 83  | C6 | PX  | -0.05883 | 0.01224  | 0.05113  | -0.04062 | -0.00273 |
| 84  | C6 | PY  | 0.01084  | -0.01095 | 0.06075  | 0.05811  | 0.02304  |
| 85  | C6 | PZ  | 0.00000  | 0.00000  | 0.00000  | 0.00000  | 0.00000  |
| 86  | C6 | S   | -0.13143 | 0.30601  | 0.37854  | 0.07653  | -0.48738 |
| 87  | C6 | PX  | 0.18084  | 0.41041  | 0.16578  | -0.27909 | -0.00303 |
| 88  | C6 | PY  | 0.06595  | 0.11015  | 0.04905  | -0.09925 | -0.21228 |
| 89  | C6 | PZ  | 0.00000  | 0.00000  | 0.00000  | 0.00000  | 0.00000  |
| 90  | C6 | DXX | 0.01588  | -0.00060 | -0.00206 | -0.00675 | -0.00336 |
| 91  | C6 | DYY | -0.01606 | 0.00218  | 0.01189  | -0.00106 | -0.00474 |
| 92  | C6 | DZZ | -0.00240 | -0.00065 | -0.00281 | 0.00211  | 0.00070  |
| 93  | C6 | DXY | -0.00118 | 0.00036  | -0.00181 | 0.02064  | 0.00127  |
| 94  | C6 | DXZ | 0.00000  | 0.00000  | 0.00000  | 0.00000  | 0.00000  |
| 95  | C6 | DYZ | 0.00000  | 0.00000  | 0.00000  | 0.00000  | 0.00000  |
| 96  | C7 | S   | 0.00662  | -0.01502 | 0.06742  | -0.02984 | 0.02931  |
| 97  | C7 | S   | -0.01287 | -0.00308 | -0.13624 | 0.05226  | -0.01206 |
| 98  | C7 | PX  | -0.06339 | 0.13039  | -0.07280 | 0.06043  | -0.02195 |
| 99  | C7 | PY  | 0.00581  | 0.00930  | 0.07957  | -0.04375 | 0.05133  |
| 100 | C7 | PZ  | 0.00000  | 0.00000  | 0.00000  | 0.00000  | 0.00000  |
| 101 | C7 | S   | -0.00441 | 0.44058  | -0.61198 | 0.22009  | -0.56690 |
| 102 | C7 | PX  | -0.35485 | 0.41643  | -0.63964 | 0.63772  | -0.11907 |
| 103 | C7 | PY  | 0.45472  | -0.37298 | 0.78114  | 0.10672  | -0.09171 |
| 104 | C7 | PZ  | 0.00000  | 0.00000  | 0.00000  | 0.00000  | 0.00000  |
| 105 | C7 | DXX | 0.01218  | -0.01266 | 0.00060  | -0.01069 | 0.00311  |
| 106 | C7 | DYY | -0.00859 | 0.00986  | 0.01334  | -0.00433 | -0.00112 |
| 107 | C7 | DZZ | -0.00039 | -0.00200 | -0.00854 | 0.00543  | 0.00293  |
| 108 | C7 | DXY | -0.00494 | 0.00956  | 0.01318  | 0.00958  | 0.00246  |
| 109 | C7 | DXZ | 0.00000  | 0.00000  | 0.00000  | 0.00000  | 0.00000  |
| 110 | C7 | DYZ | 0.00000  | 0.00000  | 0.00000  | 0.00000  | 0.00000  |
| 111 | H3 | S   | 0.00291  | -0.00956 | -0.00162 | 0.00970  | 0.00622  |
| 112 | H3 | S   | 0.16063  | 0.35112  | -1.25032 | -1.01261 | 1.19815  |
| 113 | H3 | PX  | -0.00235 | -0.00126 | 0.00162  | 0.00450  | 0.00363  |
| 114 | H3 | PY  | 0.00068  | -0.00216 | 0.00599  | 0.00365  | -0.00644 |
| 115 | H3 | PZ  | 0.00000  | 0.00000  | 0.00000  | 0.00000  | 0.00000  |
| 116 | H4 | S   | -0.00441 | 0.00390  | 0.01311  | 0.00802  | 0.00534  |
| 117 | H4 | S   | -0.88499 | -0.49922 | 0.34001  | -0.73197 | -1.67065 |
| 118 | H4 | PX  | -0.00385 | -0.00266 | -0.00187 | -0.00558 | 0.00041  |
| 119 | H4 | PY  | 0.00294  | 0.00145  | -0.00113 | 0.00069  | 0.00780  |
| 120 | H4 | PZ  | 0.00000  | 0.00000  | 0.00000  | 0.00000  | 0.00000  |
| 121 | N1 | S   | 0.00135  | -0.01409 | -0.01249 | 0.01606  | 0.00685  |
| 122 | N1 | S   | -0.02004 | 0.05348  | 0.02271  | -0.02194 | -0.00947 |
| 123 | N1 | PX  | -0.06232 | 0.08820  | -0.00123 | 0.00796  | 0.02576  |
| 124 | N1 | PY  | -0.00006 | -0.04900 | -0.02375 | 0.05074  | -0.00605 |



|     |     |     |          |          |          |          |          |
|-----|-----|-----|----------|----------|----------|----------|----------|
| 125 | N1  | PZ  | 0.00000  | 0.00000  | 0.00000  | 0.00000  | 0.00000  |
| 126 | N1  | S   | 0.15635  | -0.00162 | 0.14231  | -0.22057 | -0.20549 |
| 127 | N1  | PX  | -0.02834 | -0.00065 | -0.02460 | -0.01737 | -0.10678 |
| 128 | N1  | PY  | 0.10153  | 0.05758  | -0.05282 | -0.03908 | 0.08615  |
| 129 | N1  | PZ  | 0.00000  | 0.00000  | 0.00000  | 0.00000  | 0.00000  |
| 130 | N1  | DXX | -0.00091 | -0.00105 | 0.00745  | -0.00223 | 0.00115  |
| 131 | N1  | DYY | 0.00289  | 0.00049  | -0.01987 | 0.00669  | -0.00377 |
| 132 | N1  | DZZ | -0.00383 | 0.00632  | 0.00223  | 0.00334  | -0.00007 |
| 133 | N1  | DXY | -0.00977 | 0.00977  | -0.00069 | -0.00848 | -0.00024 |
| 134 | N1  | DXZ | 0.00000  | 0.00000  | 0.00000  | 0.00000  | 0.00000  |
| 135 | N1  | DYZ | 0.00000  | 0.00000  | 0.00000  | 0.00000  | 0.00000  |
| 136 | H6  | S   | -0.02758 | 0.00489  | -0.00228 | 0.00144  | 0.02101  |
| 137 | H6  | S   | -0.96317 | -0.80302 | 0.54869  | 1.26812  | 1.37537  |
| 138 | H6  | PX  | -0.00251 | -0.00313 | 0.00244  | 0.00587  | 0.00360  |
| 139 | H6  | PY  | -0.00009 | 0.00057  | 0.00263  | 0.00304  | -0.00384 |
| 140 | H6  | PZ  | 0.00000  | 0.00000  | 0.00000  | 0.00000  | 0.00000  |
| 141 | C8  | S   | -0.01209 | 0.00670  | -0.02425 | -0.02611 | -0.00886 |
| 142 | C8  | S   | 0.01755  | -0.01756 | 0.02883  | 0.02386  | 0.01377  |
| 143 | C8  | PX  | -0.01920 | 0.07574  | 0.13763  | -0.04581 | 0.00792  |
| 144 | C8  | PY  | 0.06287  | -0.05238 | 0.06167  | 0.00187  | 0.03177  |
| 145 | C8  | PZ  | 0.00000  | 0.00000  | 0.00000  | 0.00000  | 0.00000  |
| 146 | C8  | S   | 0.30986  | 0.00530  | 0.36638  | 0.69856  | 0.08620  |
| 147 | C8  | PX  | 0.06976  | -0.36001 | 0.16273  | 0.31456  | -0.16297 |
| 148 | C8  | PY  | -0.17749 | 0.00909  | -0.24374 | 0.01348  | 0.21827  |
| 149 | C8  | PZ  | 0.00000  | 0.00000  | 0.00000  | 0.00000  | 0.00000  |
| 150 | C8  | DXX | -0.00786 | 0.01267  | -0.00934 | 0.00629  | -0.00191 |
| 151 | C8  | DYY | 0.00411  | -0.00456 | 0.00685  | -0.00680 | 0.00463  |
| 152 | C8  | DZZ | 0.00194  | -0.00337 | -0.00032 | 0.00018  | 0.00038  |
| 153 | C8  | DXY | 0.01172  | -0.03070 | -0.01973 | 0.01503  | -0.01037 |
| 154 | C8  | DXZ | 0.00000  | 0.00000  | 0.00000  | 0.00000  | 0.00000  |
| 155 | C8  | DYZ | 0.00000  | 0.00000  | 0.00000  | 0.00000  | 0.00000  |
| 156 | H8  | S   | 0.03048  | -0.04162 | -0.00957 | -0.04395 | 0.01847  |
| 157 | H8  | S   | 0.57578  | -0.87748 | 1.32511  | -0.80256 | 0.42538  |
| 158 | H8  | PX  | 0.00101  | 0.00151  | -0.00121 | -0.00228 | 0.00107  |
| 159 | H8  | PY  | 0.00344  | 0.00346  | 0.00582  | 0.00044  | 0.00229  |
| 160 | H8  | PZ  | 0.00000  | 0.00000  | 0.00000  | 0.00000  | 0.00000  |
| 161 | C10 | S   | -0.07105 | 0.05218  | -0.01587 | 0.03459  | -0.00596 |
| 162 | C10 | S   | 0.08612  | -0.06157 | 0.02311  | -0.03009 | 0.00047  |
| 163 | C10 | PX  | -0.03499 | 0.20167  | 0.17336  | -0.11671 | 0.07068  |
| 164 | C10 | PY  | -0.12007 | 0.05928  | -0.04792 | 0.03334  | -0.01196 |
| 165 | C10 | PZ  | 0.00000  | 0.00000  | 0.00000  | 0.00000  | 0.00000  |
| 166 | C10 | S   | 0.98993  | -0.83964 | 0.00876  | -0.62913 | 0.21559  |
| 167 | C10 | PX  | -0.24665 | 1.09187  | 0.80702  | -0.71069 | 0.41381  |
| 168 | C10 | PY  | -0.57969 | 0.19726  | -0.29199 | -0.01223 | 0.02498  |
| 169 | C10 | PZ  | 0.00000  | 0.00000  | 0.00000  | 0.00000  | 0.00000  |
| 170 | C10 | DXX | -0.00739 | 0.00642  | -0.00323 | -0.00118 | -0.00054 |
| 171 | C10 | DYY | -0.00199 | -0.00060 | -0.00495 | 0.00335  | -0.00138 |
| 172 | C10 | DZZ | -0.00247 | 0.00148  | 0.00100  | 0.00308  | 0.00001  |
| 173 | C10 | DXY | -0.00519 | 0.01185  | 0.01227  | -0.00803 | 0.00400  |
| 174 | C10 | DXZ | 0.00000  | 0.00000  | 0.00000  | 0.00000  | 0.00000  |
| 175 | C10 | DYZ | 0.00000  | 0.00000  | 0.00000  | 0.00000  | 0.00000  |
| 176 | H16 | S   | -0.00265 | -0.01034 | -0.03875 | 0.02515  | -0.01248 |
| 177 | H16 | S   | -0.68886 | -0.50302 | -1.12812 | 0.99122  | -0.46176 |
| 178 | H16 | PX  | -0.00261 | 0.00458  | 0.00156  | -0.00217 | 0.00127  |

|     |     |    |          |         |          |          |          |
|-----|-----|----|----------|---------|----------|----------|----------|
| 179 | H16 | PY | -0.00261 | 0.00039 | 0.00123  | -0.00114 | 0.00047  |
| 180 | H16 | PZ | 0.00000  | 0.00000 | 0.00000  | 0.00000  | 0.00000  |
| 181 | H18 | S  | -0.03261 | 0.03781 | 0.02639  | -0.01463 | 0.00813  |
| 182 | H18 | S  | -1.10230 | 1.68880 | 0.72991  | -0.41110 | 0.36028  |
| 183 | H18 | PX | -0.00006 | 0.00258 | 0.00467  | -0.00247 | 0.00155  |
| 184 | H18 | PY | -0.00217 | 0.00199 | -0.00086 | -0.00014 | -0.00087 |
| 185 | H18 | PZ | 0.00000  | 0.00000 | 0.00000  | 0.00000  | 0.00000  |

|              |          |          |          |          |          |
|--------------|----------|----------|----------|----------|----------|
| MO:          | 46       | 47       | 48       | 49       | 50       |
| Eigenvalues: | 0.37743  | 0.40578  | 0.43114  | 0.44063  | 0.47847  |
| (ev):        | 10.27040 | 11.04189 | 11.73184 | 11.99020 | 13.01975 |

|    |    | A   | A        | A        | A        | A        |          |
|----|----|-----|----------|----------|----------|----------|----------|
| 1  | H1 | S   | 0.00000  | 0.02203  | -0.06158 | -0.07220 | 0.07146  |
| 2  | H1 | S   | 0.00000  | 0.71283  | -0.28327 | 0.08502  | -0.05349 |
| 3  | H1 | PX  | 0.00000  | -0.00276 | -0.00416 | -0.00524 | 0.00551  |
| 4  | H1 | PY  | 0.00000  | 0.00835  | 0.01169  | -0.00034 | 0.01018  |
| 5  | H1 | PZ  | -0.01428 | 0.00000  | 0.00000  | 0.00000  | 0.00000  |
| 6  | C1 | S   | 0.00000  | 0.02755  | 0.03317  | 0.04028  | -0.02248 |
| 7  | C1 | S   | 0.00000  | 0.00717  | -0.07451 | -0.00932 | 0.01741  |
| 8  | C1 | PX  | 0.00000  | -0.02354 | 0.08946  | 0.01815  | -0.01263 |
| 9  | C1 | PY  | 0.00000  | -0.01216 | 0.10950  | 0.05654  | 0.11001  |
| 10 | C1 | PZ  | -0.19480 | 0.00000  | 0.00000  | 0.00000  | 0.00000  |
| 11 | C1 | S   | 0.00000  | -0.55673 | -0.69026 | -1.35810 | 1.10520  |
| 12 | C1 | PX  | 0.00000  | -0.64941 | 0.33061  | 0.27918  | -0.27466 |
| 13 | C1 | PY  | 0.00000  | 1.38673  | 0.22291  | -0.11647 | 1.32139  |
| 14 | C1 | PZ  | -0.63665 | 0.00000  | 0.00000  | 0.00000  | 0.00000  |
| 15 | C1 | DXX | 0.00000  | -0.00162 | -0.02128 | -0.02449 | 0.02217  |
| 16 | C1 | DYY | 0.00000  | 0.00582  | 0.02345  | 0.01821  | -0.00825 |
| 17 | C1 | DZZ | 0.00000  | 0.00436  | -0.00798 | 0.00272  | -0.00162 |
| 18 | C1 | DXY | 0.00000  | 0.02001  | 0.01645  | -0.00689 | 0.02129  |
| 19 | C1 | DXZ | -0.01838 | 0.00000  | 0.00000  | 0.00000  | 0.00000  |
| 20 | C1 | DYZ | -0.00658 | 0.00000  | 0.00000  | 0.00000  | 0.00000  |
| 21 | C2 | S   | 0.00000  | -0.02244 | -0.02253 | -0.02212 | -0.00468 |
| 22 | C2 | S   | 0.00000  | 0.03669  | 0.00982  | 0.03383  | 0.02920  |
| 23 | C2 | PX  | 0.00000  | 0.08397  | -0.04145 | 0.00715  | 0.04118  |
| 24 | C2 | PY  | 0.00000  | -0.06694 | -0.01439 | -0.04287 | 0.09384  |
| 25 | C2 | PZ  | 0.21091  | 0.00000  | 0.00000  | 0.00000  | 0.00000  |
| 26 | C2 | S   | 0.00000  | 0.21522  | 0.71437  | 0.59938  | 0.13116  |
| 27 | C2 | PX  | 0.00000  | 0.21485  | -0.62489 | -0.03552 | 0.20370  |
| 28 | C2 | PY  | 0.00000  | -0.67785 | -0.80795 | 0.83916  | 1.32769  |
| 29 | C2 | PZ  | 0.65261  | 0.00000  | 0.00000  | 0.00000  | 0.00000  |
| 30 | C2 | DXX | 0.00000  | 0.00025  | 0.02378  | 0.02850  | 0.00840  |
| 31 | C2 | DYY | 0.00000  | -0.00394 | -0.01949 | -0.02359 | 0.01221  |
| 32 | C2 | DZZ | 0.00000  | 0.00175  | -0.00008 | 0.00102  | -0.00447 |
| 33 | C2 | DXY | 0.00000  | 0.01831  | 0.01511  | -0.00962 | -0.02068 |
| 34 | C2 | DXZ | -0.01981 | 0.00000  | 0.00000  | 0.00000  | 0.00000  |
| 35 | C2 | DYZ | 0.00604  | 0.00000  | 0.00000  | 0.00000  | 0.00000  |
| 36 | C3 | S   | 0.00000  | -0.08716 | -0.03537 | -0.00414 | -0.03263 |
| 37 | C3 | S   | 0.00000  | 0.12396  | 0.06332  | 0.00244  | 0.07049  |
| 38 | C3 | PX  | 0.00000  | 0.00108  | 0.01474  | 0.21186  | 0.00868  |
| 39 | C3 | PY  | 0.00000  | 0.03647  | 0.15579  | -0.03466 | 0.03092  |
| 40 | C3 | PZ  | 0.31189  | 0.00000  | 0.00000  | 0.00000  | 0.00000  |
| 41 | C3 | S   | 0.00000  | 2.05302  | -0.47711 | 0.33672  | 0.45070  |

|    |    |     |          |          |          |          |          |
|----|----|-----|----------|----------|----------|----------|----------|
| 42 | C3 | PX  | 0.00000  | 0.74814  | -0.02999 | 0.99098  | -0.00143 |
| 43 | C3 | PY  | 0.00000  | 0.37227  | 0.97884  | -0.23654 | 0.25237  |
| 44 | C3 | PZ  | 0.74677  | 0.00000  | 0.00000  | 0.00000  | 0.00000  |
| 45 | C3 | DXX | 0.00000  | -0.02446 | 0.01186  | 0.02544  | -0.01446 |
| 46 | C3 | DYY | 0.00000  | 0.03159  | -0.03087 | -0.01488 | 0.02660  |
| 47 | C3 | DZZ | 0.00000  | 0.00499  | 0.00686  | -0.00464 | 0.00045  |
| 48 | C3 | DXY | 0.00000  | 0.00614  | -0.00585 | -0.00418 | -0.02286 |
| 49 | C3 | DXZ | 0.01175  | 0.00000  | 0.00000  | 0.00000  | 0.00000  |
| 50 | C3 | DYZ | -0.00786 | 0.00000  | 0.00000  | 0.00000  | 0.00000  |
| 51 | C4 | S   | 0.00000  | 0.02604  | 0.04491  | -0.00329 | 0.02402  |
| 52 | C4 | S   | 0.00000  | -0.02176 | -0.02289 | -0.00148 | -0.03130 |
| 53 | C4 | PX  | 0.00000  | 0.08967  | 0.14794  | 0.07073  | -0.09141 |
| 54 | C4 | PY  | 0.00000  | 0.14687  | 0.01491  | -0.07605 | 0.09528  |
| 55 | C4 | PZ  | 0.19442  | 0.00000  | 0.00000  | 0.00000  | 0.00000  |
| 56 | C4 | S   | 0.00000  | -1.18641 | -1.06207 | 0.06705  | -1.08840 |
| 57 | C4 | PX  | 0.00000  | 0.35845  | 1.25299  | 0.55265  | -1.10802 |
| 58 | C4 | PY  | 0.00000  | 1.02308  | 0.12663  | -0.85952 | 0.69293  |
| 59 | C4 | PZ  | 0.56991  | 0.00000  | 0.00000  | 0.00000  | 0.00000  |
| 60 | C4 | DXX | 0.00000  | 0.00569  | 0.01884  | 0.01331  | -0.00590 |
| 61 | C4 | DYY | 0.00000  | -0.01382 | -0.02080 | -0.01262 | -0.00060 |
| 62 | C4 | DZZ | 0.00000  | -0.00167 | 0.00030  | -0.00331 | -0.00132 |
| 63 | C4 | DXY | 0.00000  | 0.00988  | 0.00194  | -0.00993 | -0.01684 |
| 64 | C4 | DXZ | 0.00304  | 0.00000  | 0.00000  | 0.00000  | 0.00000  |
| 65 | C4 | DYZ | 0.01146  | 0.00000  | 0.00000  | 0.00000  | 0.00000  |
| 66 | C5 | S   | 0.00000  | -0.02520 | -0.04724 | 0.00527  | 0.04578  |
| 67 | C5 | S   | 0.00000  | 0.02597  | 0.01553  | 0.00157  | -0.02041 |
| 68 | C5 | PX  | 0.00000  | 0.09352  | 0.16933  | 0.10098  | -0.01391 |
| 69 | C5 | PY  | 0.00000  | -0.06434 | -0.05679 | 0.10564  | 0.08705  |
| 70 | C5 | PZ  | -0.19384 | 0.00000  | 0.00000  | 0.00000  | 0.00000  |
| 71 | C5 | S   | 0.00000  | 0.70895  | 1.65080  | -0.29851 | -1.69517 |
| 72 | C5 | PX  | 0.00000  | 0.48677  | 1.17023  | 0.61760  | 0.06408  |
| 73 | C5 | PY  | 0.00000  | -0.50147 | -0.53671 | 0.85357  | 0.72094  |
| 74 | C5 | PZ  | -0.58077 | 0.00000  | 0.00000  | 0.00000  | 0.00000  |
| 75 | C5 | DXX | 0.00000  | -0.01171 | -0.01063 | -0.00672 | -0.00248 |
| 76 | C5 | DYY | 0.00000  | 0.01582  | 0.01797  | 0.00674  | -0.00424 |
| 77 | C5 | DZZ | 0.00000  | 0.00183  | -0.00113 | 0.00284  | 0.00076  |
| 78 | C5 | DXY | 0.00000  | 0.00413  | -0.00099 | -0.00901 | 0.01585  |
| 79 | C5 | DXZ | 0.00251  | 0.00000  | 0.00000  | 0.00000  | 0.00000  |
| 80 | C5 | DYZ | -0.01221 | 0.00000  | 0.00000  | 0.00000  | 0.00000  |
| 81 | C6 | S   | 0.00000  | 0.07146  | 0.03782  | -0.02752 | 0.00459  |
| 82 | C6 | S   | 0.00000  | -0.08511 | -0.08813 | 0.07879  | 0.03061  |
| 83 | C6 | PX  | 0.00000  | -0.10231 | 0.10608  | 0.17000  | -0.16029 |
| 84 | C6 | PY  | 0.00000  | -0.10702 | -0.04346 | 0.03679  | 0.15100  |
| 85 | C6 | PZ  | -0.33580 | 0.00000  | 0.00000  | 0.00000  | 0.00000  |
| 86 | C6 | S   | 0.00000  | -0.96912 | -0.72554 | 0.66524  | -0.42126 |
| 87 | C6 | PX  | 0.00000  | 0.10435  | 0.72150  | 0.40233  | -0.33823 |
| 88 | C6 | PY  | 0.00000  | -0.46621 | -0.38791 | 0.86069  | 1.26540  |
| 89 | C6 | PZ  | -0.75535 | 0.00000  | 0.00000  | 0.00000  | 0.00000  |
| 90 | C6 | DXX | 0.00000  | 0.00945  | 0.00395  | -0.01867 | 0.00208  |
| 91 | C6 | DYY | 0.00000  | 0.00358  | -0.00597 | 0.02760  | 0.00352  |
| 92 | C6 | DZZ | 0.00000  | -0.00689 | -0.00750 | 0.00328  | -0.00634 |
| 93 | C6 | DXY | 0.00000  | -0.00347 | 0.01566  | -0.00283 | 0.01525  |
| 94 | C6 | DXZ | 0.00347  | 0.00000  | 0.00000  | 0.00000  | 0.00000  |
| 95 | C6 | DYZ | 0.00282  | 0.00000  | 0.00000  | 0.00000  | 0.00000  |

|     |    |     |          |          |          |          |          |
|-----|----|-----|----------|----------|----------|----------|----------|
| 96  | C7 | S   | 0.00000  | -0.01208 | 0.03305  | 0.02804  | -0.01872 |
| 97  | C7 | S   | 0.00000  | 0.01324  | -0.07798 | -0.02182 | 0.07032  |
| 98  | C7 | PX  | 0.00000  | -0.03399 | 0.09746  | -0.03045 | -0.02235 |
| 99  | C7 | PY  | 0.00000  | -0.01820 | -0.01245 | -0.03860 | 0.10874  |
| 100 | C7 | PZ  | -0.06172 | 0.00000  | 0.00000  | 0.00000  | 0.00000  |
| 101 | C7 | S   | 0.00000  | 0.33061  | 0.21031  | -1.14062 | 0.46981  |
| 102 | C7 | PX  | 0.00000  | -0.78184 | 0.11618  | -0.19394 | -1.14574 |
| 103 | C7 | PY  | 0.00000  | -1.36436 | 1.15215  | -0.29771 | 0.30450  |
| 104 | C7 | PZ  | -0.40299 | 0.00000  | 0.00000  | 0.00000  | 0.00000  |
| 105 | C7 | DXX | 0.00000  | -0.00615 | 0.00499  | -0.02960 | 0.00405  |
| 106 | C7 | DYY | 0.00000  | 0.00418  | 0.00128  | 0.02700  | 0.00649  |
| 107 | C7 | DZZ | 0.00000  | 0.00185  | -0.00308 | -0.00388 | 0.00260  |
| 108 | C7 | DXY | 0.00000  | -0.01964 | 0.01486  | 0.02532  | -0.00110 |
| 109 | C7 | DXZ | -0.00480 | 0.00000  | 0.00000  | 0.00000  | 0.00000  |
| 110 | C7 | DYZ | 0.02932  | 0.00000  | 0.00000  | 0.00000  | 0.00000  |
| 111 | H3 | S   | 0.00000  | -0.01380 | -0.03819 | -0.04047 | -0.04644 |
| 112 | H3 | S   | 0.00000  | -0.92326 | -0.29414 | 0.40242  | -0.01999 |
| 113 | H3 | PX  | 0.00000  | 0.00913  | 0.00821  | 0.00007  | -0.00955 |
| 114 | H3 | PY  | 0.00000  | -0.00472 | -0.00476 | -0.00546 | -0.00057 |
| 115 | H3 | PZ  | 0.01209  | 0.00000  | 0.00000  | 0.00000  | 0.00000  |
| 116 | H4 | S   | 0.00000  | 0.01978  | 0.03208  | 0.02212  | -0.06799 |
| 117 | H4 | S   | 0.00000  | 0.50977  | 0.63525  | -0.34260 | -0.28106 |
| 118 | H4 | PX  | 0.00000  | 0.00766  | 0.00663  | -0.00248 | 0.00561  |
| 119 | H4 | PY  | 0.00000  | 0.00456  | 0.00587  | 0.00197  | -0.00149 |
| 120 | H4 | PZ  | -0.01205 | 0.00000  | 0.00000  | 0.00000  | 0.00000  |
| 121 | N1 | S   | 0.00000  | -0.01083 | -0.00927 | -0.08647 | -0.06256 |
| 122 | N1 | S   | 0.00000  | 0.05722  | -0.00298 | 0.08401  | 0.06655  |
| 123 | N1 | PX  | 0.00000  | 0.10929  | -0.05041 | 0.05750  | -0.00731 |
| 124 | N1 | PY  | 0.00000  | 0.00178  | 0.06922  | -0.07029 | 0.05344  |
| 125 | N1 | PZ  | 0.14631  | 0.00000  | 0.00000  | 0.00000  | 0.00000  |
| 126 | N1 | S   | 0.00000  | -0.18353 | 0.36997  | 1.96341  | 1.73138  |
| 127 | N1 | PX  | 0.00000  | 0.05469  | -0.07568 | 0.68926  | 0.76048  |
| 128 | N1 | PY  | 0.00000  | 0.11875  | 0.35593  | -0.36110 | 0.51483  |
| 129 | N1 | PZ  | 0.37853  | 0.00000  | 0.00000  | 0.00000  | 0.00000  |
| 130 | N1 | DXX | 0.00000  | 0.00634  | 0.00333  | -0.00525 | 0.00241  |
| 131 | N1 | DYY | 0.00000  | 0.01162  | -0.00926 | -0.01474 | 0.01063  |
| 132 | N1 | DZZ | 0.00000  | -0.00058 | -0.00355 | -0.02216 | -0.02015 |
| 133 | N1 | DXY | 0.00000  | -0.00044 | -0.00459 | 0.01317  | -0.00325 |
| 134 | N1 | DXZ | -0.00018 | 0.00000  | 0.00000  | 0.00000  | 0.00000  |
| 135 | N1 | DYZ | -0.02202 | 0.00000  | 0.00000  | 0.00000  | 0.00000  |
| 136 | H6 | S   | 0.00000  | 0.00345  | 0.05863  | 0.08373  | 0.01486  |
| 137 | H6 | S   | 0.00000  | 0.20774  | -0.71393 | -0.09938 | 0.23437  |
| 138 | H6 | PX  | 0.00000  | 0.00049  | -0.00741 | -0.00638 | -0.00276 |
| 139 | H6 | PY  | 0.00000  | -0.00774 | -0.00806 | 0.00503  | 0.01346  |
| 140 | H6 | PZ  | 0.01474  | 0.00000  | 0.00000  | 0.00000  | 0.00000  |
| 141 | C8 | S   | 0.00000  | 0.07175  | -0.08607 | 0.05805  | -0.02680 |
| 142 | C8 | S   | 0.00000  | -0.03215 | 0.08894  | -0.03719 | 0.10276  |
| 143 | C8 | PX  | 0.00000  | -0.11134 | 0.08893  | 0.21469  | -0.02264 |
| 144 | C8 | PY  | 0.00000  | -0.00053 | -0.01737 | -0.02860 | -0.12113 |
| 145 | C8 | PZ  | 0.00037  | 0.00000  | 0.00000  | 0.00000  | 0.00000  |
| 146 | C8 | S   | 0.00000  | -2.26608 | 2.66384  | -1.88145 | 0.95554  |
| 147 | C8 | PX  | 0.00000  | -0.95066 | 0.52156  | 1.40078  | -0.03361 |
| 148 | C8 | PY  | 0.00000  | 0.40665  | -1.23174 | 0.04214  | -2.18970 |
| 149 | C8 | PZ  | 0.00046  | 0.00000  | 0.00000  | 0.00000  | 0.00000  |

|     |     |     |          |          |          |          |          |
|-----|-----|-----|----------|----------|----------|----------|----------|
| 150 | C8  | DXX | 0.00000  | 0.00642  | -0.00860 | 0.01361  | -0.00508 |
| 151 | C8  | DYY | 0.00000  | -0.00882 | 0.01897  | -0.02485 | 0.01774  |
| 152 | C8  | DZZ | 0.00000  | 0.00274  | 0.00200  | -0.00566 | -0.00058 |
| 153 | C8  | DXY | 0.00000  | -0.01927 | 0.00050  | -0.00828 | 0.00060  |
| 154 | C8  | DXZ | -0.02167 | 0.00000  | 0.00000  | 0.00000  | 0.00000  |
| 155 | C8  | DYZ | 0.00101  | 0.00000  | 0.00000  | 0.00000  | 0.00000  |
| 156 | H8  | S   | 0.00000  | 0.02641  | 0.00819  | -0.12296 | 0.01984  |
| 157 | H8  | S   | 0.00000  | 0.13141  | 0.15173  | 0.32785  | 0.83967  |
| 158 | H8  | PX  | 0.00000  | -0.00180 | 0.00114  | -0.01034 | -0.00450 |
| 159 | H8  | PY  | 0.00000  | -0.00776 | 0.00571  | -0.00068 | -0.00177 |
| 160 | H8  | PZ  | -0.00753 | 0.00000  | 0.00000  | 0.00000  | 0.00000  |
| 161 | C10 | S   | 0.00000  | -0.03805 | 0.05039  | -0.03273 | 0.03781  |
| 162 | C10 | S   | 0.00000  | -0.00852 | 0.02820  | -0.01110 | 0.07093  |
| 163 | C10 | PX  | 0.00000  | -0.00349 | -0.03411 | -0.14969 | 0.00009  |
| 164 | C10 | PY  | 0.00000  | -0.02790 | 0.03254  | -0.04840 | 0.05233  |
| 165 | C10 | PZ  | 0.00891  | 0.00000  | 0.00000  | 0.00000  | 0.00000  |
| 166 | C10 | S   | 0.00000  | 1.26674  | -2.04767 | 0.98608  | -2.15973 |
| 167 | C10 | PX  | 0.00000  | 0.58155  | -0.51526 | -1.01902 | -0.06662 |
| 168 | C10 | PY  | 0.00000  | 0.72319  | -1.39967 | 0.71693  | -1.65225 |
| 169 | C10 | PZ  | 0.00407  | 0.00000  | 0.00000  | 0.00000  | 0.00000  |
| 170 | C10 | DXX | 0.00000  | 0.01068  | -0.01586 | 0.01456  | -0.00945 |
| 171 | C10 | DYY | 0.00000  | -0.00219 | 0.00148  | -0.00083 | 0.00795  |
| 172 | C10 | DZZ | 0.00000  | -0.00887 | 0.01357  | -0.01194 | 0.01007  |
| 173 | C10 | DXY | 0.00000  | 0.00272  | 0.00872  | 0.03546  | 0.01052  |
| 174 | C10 | DXZ | -0.00752 | 0.00000  | 0.00000  | 0.00000  | 0.00000  |
| 175 | C10 | DYZ | 0.00015  | 0.00000  | 0.00000  | 0.00000  | 0.00000  |
| 176 | H16 | S   | 0.00000  | -0.00506 | -0.04310 | -0.07049 | -0.06946 |
| 177 | H16 | S   | 0.00000  | -0.48389 | 0.37918  | 0.72256  | -0.17885 |
| 178 | H16 | PX  | 0.00000  | 0.00495  | -0.00517 | 0.00019  | -0.00105 |
| 179 | H16 | PY  | 0.00000  | 0.00311  | -0.00365 | 0.01382  | -0.00085 |
| 180 | H16 | PZ  | -0.00095 | 0.00000  | 0.00000  | 0.00000  | 0.00000  |
| 181 | H18 | S   | 0.00000  | 0.03554  | -0.02216 | 0.10737  | -0.01146 |
| 182 | H18 | S   | 0.00000  | 0.19138  | -0.28790 | -0.95919 | -0.07605 |
| 183 | H18 | PX  | 0.00000  | 0.00076  | 0.00086  | -0.00240 | 0.00198  |
| 184 | H18 | PY  | 0.00000  | 0.00329  | -0.00699 | -0.00747 | -0.00941 |
| 185 | H18 | PZ  | 0.00186  | 0.00000  | 0.00000  | 0.00000  | 0.00000  |

|              |          |          |          |          |          |
|--------------|----------|----------|----------|----------|----------|
| MO:          | 51       | 52       | 53       | 54       | 55       |
| Eigenvalues: | 0.49030  | 0.51970  | 0.54355  | 0.60485  | 0.67678  |
| (ev):        | 13.34168 | 14.14184 | 14.79076 | 16.45886 | 18.41607 |

|    |    |    |          |          |          |          |          |
|----|----|----|----------|----------|----------|----------|----------|
|    |    | A  | A        | A        | A        | A        |          |
| 1  | H1 | S  | -0.01427 | -0.03883 | 0.10299  | 0.07621  | 0.02263  |
| 2  | H1 | S  | 0.65913  | -0.05137 | -0.80123 | -0.26307 | -0.04286 |
| 3  | H1 | PX | -0.00179 | -0.00407 | 0.01031  | 0.00894  | 0.00074  |
| 4  | H1 | PY | -0.00558 | 0.00803  | 0.00619  | -0.00094 | -0.01485 |
| 5  | H1 | PZ | 0.00000  | 0.00000  | 0.00000  | 0.00000  | 0.00000  |
| 6  | C1 | S  | -0.07350 | 0.00307  | 0.01004  | 0.01635  | 0.03748  |
| 7  | C1 | S  | 0.06177  | 0.00404  | -0.01098 | -0.04092 | -0.08733 |
| 8  | C1 | PX | -0.16840 | -0.00023 | 0.08290  | 0.02372  | 0.09263  |
| 9  | C1 | PY | 0.02254  | 0.13338  | -0.07018 | 0.23132  | 0.18922  |
| 10 | C1 | PZ | 0.00000  | 0.00000  | 0.00000  | 0.00000  | 0.00000  |
| 11 | C1 | S  | 2.05776  | -0.24854 | -0.50426 | 0.66036  | -0.57445 |
| 12 | C1 | PX | -1.32308 | -0.00977 | 1.07669  | 0.30135  | 0.25775  |

|    |    |     |          |          |          |          |          |
|----|----|-----|----------|----------|----------|----------|----------|
| 13 | C1 | PY  | -0.79341 | 1.64943  | -0.63109 | 1.01084  | -1.61620 |
| 14 | C1 | PZ  | 0.00000  | 0.00000  | 0.00000  | 0.00000  | 0.00000  |
| 15 | C1 | DXX | 0.00152  | -0.01221 | 0.04103  | 0.01635  | -0.00344 |
| 16 | C1 | DYY | 0.00678  | 0.00834  | -0.04132 | -0.00345 | 0.01212  |
| 17 | C1 | DZZ | -0.00122 | -0.00082 | -0.00103 | -0.00645 | -0.01430 |
| 18 | C1 | DXY | -0.01019 | 0.01337  | 0.02318  | -0.00557 | -0.01669 |
| 19 | C1 | DXZ | 0.00000  | 0.00000  | 0.00000  | 0.00000  | 0.00000  |
| 20 | C1 | DYZ | 0.00000  | 0.00000  | 0.00000  | 0.00000  | 0.00000  |
| 21 | C2 | S   | -0.08744 | 0.00462  | 0.01663  | -0.01740 | -0.01295 |
| 22 | C2 | S   | 0.06910  | -0.02408 | 0.04397  | -0.01017 | 0.08527  |
| 23 | C2 | PX  | 0.15913  | -0.04462 | -0.04015 | 0.02475  | 0.03178  |
| 24 | C2 | PY  | 0.02454  | 0.17089  | -0.14162 | 0.04600  | 0.13851  |
| 25 | C2 | PZ  | 0.00000  | 0.00000  | 0.00000  | 0.00000  | 0.00000  |
| 26 | C2 | S   | 2.64763  | 0.41942  | -1.44982 | 0.17842  | 0.70070  |
| 27 | C2 | PX  | 1.45754  | -0.12867 | -0.95832 | 0.77557  | -0.07870 |
| 28 | C2 | PY  | -0.33865 | 1.67089  | -0.64312 | -1.25593 | 0.52442  |
| 29 | C2 | PZ  | 0.00000  | 0.00000  | 0.00000  | 0.00000  | 0.00000  |
| 30 | C2 | DXX | 0.01871  | 0.00102  | 0.03321  | -0.03486 | 0.04801  |
| 31 | C2 | DYY | -0.00943 | -0.00977 | -0.02164 | 0.02839  | 0.01322  |
| 32 | C2 | DZZ | 0.00020  | 0.00190  | -0.00322 | -0.00354 | -0.01474 |
| 33 | C2 | DXY | 0.01303  | -0.01263 | -0.00428 | 0.00735  | 0.00139  |
| 34 | C2 | DXZ | 0.00000  | 0.00000  | 0.00000  | 0.00000  | 0.00000  |
| 35 | C2 | DYZ | 0.00000  | 0.00000  | 0.00000  | 0.00000  | 0.00000  |
| 36 | C3 | S   | 0.07192  | 0.00974  | 0.02860  | -0.07749 | -0.04116 |
| 37 | C3 | S   | -0.04278 | -0.07145 | 0.04352  | 0.04383  | 0.01215  |
| 38 | C3 | PX  | -0.08835 | 0.09417  | -0.17921 | -0.06520 | -0.10106 |
| 39 | C3 | PY  | -0.05524 | 0.19523  | 0.07037  | -0.02752 | -0.04573 |
| 40 | C3 | PZ  | 0.00000  | 0.00000  | 0.00000  | 0.00000  | 0.00000  |
| 41 | C3 | S   | -2.04248 | 0.52213  | -1.10102 | 2.83680  | 0.67669  |
| 42 | C3 | PX  | -0.73525 | 0.78577  | -1.26728 | -0.28726 | 0.12447  |
| 43 | C3 | PY  | -0.79744 | 1.39096  | 0.94945  | -0.39230 | -1.66383 |
| 44 | C3 | PZ  | 0.00000  | 0.00000  | 0.00000  | 0.00000  | 0.00000  |
| 45 | C3 | DXX | 0.00101  | -0.00962 | -0.00219 | 0.01796  | -0.00089 |
| 46 | C3 | DYY | 0.00540  | -0.00609 | 0.03732  | -0.01097 | -0.03627 |
| 47 | C3 | DZZ | -0.00852 | 0.00394  | -0.00900 | 0.00685  | 0.01582  |
| 48 | C3 | DXY | 0.00477  | -0.01692 | -0.01580 | -0.03217 | -0.03211 |
| 49 | C3 | DXZ | 0.00000  | 0.00000  | 0.00000  | 0.00000  | 0.00000  |
| 50 | C3 | DYZ | 0.00000  | 0.00000  | 0.00000  | 0.00000  | 0.00000  |
| 51 | C4 | S   | 0.03699  | 0.03841  | -0.00942 | -0.02968 | -0.02648 |
| 52 | C4 | S   | -0.03443 | -0.00534 | -0.10014 | 0.04084  | 0.04666  |
| 53 | C4 | PX  | 0.15936  | -0.02083 | -0.03148 | -0.08066 | 0.20663  |
| 54 | C4 | PY  | 0.03200  | 0.04984  | 0.10790  | -0.04604 | -0.13551 |
| 55 | C4 | PZ  | 0.00000  | 0.00000  | 0.00000  | 0.00000  | 0.00000  |
| 56 | C4 | S   | -0.95524 | -1.76945 | 1.43224  | 0.64331  | 0.96979  |
| 57 | C4 | PX  | 0.10820  | -0.21702 | 0.21880  | -2.06549 | 0.60266  |
| 58 | C4 | PY  | 0.92814  | 0.53582  | -0.56872 | 0.29822  | -1.01452 |
| 59 | C4 | PZ  | 0.00000  | 0.00000  | 0.00000  | 0.00000  | 0.00000  |
| 60 | C4 | DXX | -0.02993 | 0.00792  | -0.00590 | -0.00754 | 0.00150  |
| 61 | C4 | DYY | 0.02134  | -0.01929 | 0.02224  | 0.00372  | 0.00417  |
| 62 | C4 | DZZ | -0.00134 | 0.00276  | -0.01317 | 0.00393  | -0.00059 |
| 63 | C4 | DXY | -0.01811 | -0.02396 | 0.02648  | -0.01712 | -0.01180 |
| 64 | C4 | DXZ | 0.00000  | 0.00000  | 0.00000  | 0.00000  | 0.00000  |
| 65 | C4 | DYZ | 0.00000  | 0.00000  | 0.00000  | 0.00000  | 0.00000  |
| 66 | C5 | S   | 0.02283  | 0.01208  | -0.00672 | 0.03083  | 0.02533  |

|     |    |     |          |          |          |          |          |
|-----|----|-----|----------|----------|----------|----------|----------|
| 67  | C5 | S   | -0.02948 | -0.01600 | -0.05464 | 0.02177  | 0.03205  |
| 68  | C5 | PX  | -0.07994 | 0.08867  | -0.01180 | -0.19944 | -0.03773 |
| 69  | C5 | PY  | 0.04274  | 0.05465  | 0.06313  | -0.09646 | -0.00320 |
| 70  | C5 | PZ  | 0.00000  | 0.00000  | 0.00000  | 0.00000  | 0.00000  |
| 71  | C5 | S   | -0.69363 | -1.07104 | 1.14021  | -1.10059 | -0.51836 |
| 72  | C5 | PX  | 0.64673  | 1.09997  | -0.68945 | -1.71537 | 0.65675  |
| 73  | C5 | PY  | 1.22667  | 0.44228  | -0.65265 | -0.13441 | 1.10596  |
| 74  | C5 | PZ  | 0.00000  | 0.00000  | 0.00000  | 0.00000  | 0.00000  |
| 75  | C5 | DXX | -0.03924 | 0.00157  | -0.00335 | 0.00191  | -0.01926 |
| 76  | C5 | DYY | 0.03056  | -0.01353 | 0.01800  | -0.00871 | 0.03146  |
| 77  | C5 | DZZ | -0.00051 | 0.00003  | -0.00741 | 0.00073  | -0.00420 |
| 78  | C5 | DXY | 0.00947  | 0.02829  | -0.03124 | 0.01952  | -0.01177 |
| 79  | C5 | DXZ | 0.00000  | 0.00000  | 0.00000  | 0.00000  | 0.00000  |
| 80  | C5 | DYZ | 0.00000  | 0.00000  | 0.00000  | 0.00000  | 0.00000  |
| 81  | C6 | S   | 0.05328  | -0.03661 | 0.08129  | 0.05694  | 0.03769  |
| 82  | C6 | S   | -0.01967 | -0.04885 | 0.05381  | -0.07916 | 0.09048  |
| 83  | C6 | PX  | 0.18764  | -0.04425 | -0.03057 | 0.05270  | -0.03807 |
| 84  | C6 | PY  | -0.11615 | 0.07881  | 0.07772  | 0.07334  | 0.09536  |
| 85  | C6 | PZ  | 0.00000  | 0.00000  | 0.00000  | 0.00000  | 0.00000  |
| 86  | C6 | S   | -1.58038 | 2.35462  | -2.60046 | -1.96479 | -1.81687 |
| 87  | C6 | PX  | 0.63566  | -0.61256 | 0.06268  | -0.35854 | 0.62264  |
| 88  | C6 | PY  | -1.04955 | -0.16344 | 2.01068  | -0.72264 | 1.98262  |
| 89  | C6 | PZ  | 0.00000  | 0.00000  | 0.00000  | 0.00000  | 0.00000  |
| 90  | C6 | DXX | -0.01463 | -0.01739 | 0.02101  | 0.01006  | 0.03554  |
| 91  | C6 | DYY | 0.02560  | 0.01688  | 0.02265  | -0.03002 | -0.01824 |
| 92  | C6 | DZZ | -0.00669 | 0.00692  | -0.01887 | -0.00525 | -0.01479 |
| 93  | C6 | DXY | -0.00171 | 0.02894  | 0.00864  | 0.00756  | 0.03761  |
| 94  | C6 | DXZ | 0.00000  | 0.00000  | 0.00000  | 0.00000  | 0.00000  |
| 95  | C6 | DYZ | 0.00000  | 0.00000  | 0.00000  | 0.00000  | 0.00000  |
| 96  | C7 | S   | -0.01824 | 0.00890  | -0.04585 | 0.08715  | 0.00232  |
| 97  | C7 | S   | 0.07761  | -0.04465 | 0.09997  | -0.13183 | -0.23520 |
| 98  | C7 | PX  | -0.01396 | 0.05493  | -0.02860 | 0.23037  | -0.03001 |
| 99  | C7 | PY  | 0.03250  | 0.09474  | 0.15516  | 0.15263  | -0.08748 |
| 100 | C7 | PZ  | 0.00000  | 0.00000  | 0.00000  | 0.00000  | 0.00000  |
| 101 | C7 | S   | -0.07545 | -0.08110 | 1.19192  | -2.39016 | -0.06388 |
| 102 | C7 | PX  | 0.76496  | 0.41173  | 0.00752  | 1.76302  | 0.04354  |
| 103 | C7 | PY  | 0.61259  | 0.44255  | 1.29911  | -0.43818 | -1.63376 |
| 104 | C7 | PZ  | 0.00000  | 0.00000  | 0.00000  | 0.00000  | 0.00000  |
| 105 | C7 | DXX | 0.02123  | 0.00157  | 0.03569  | -0.01865 | -0.04456 |
| 106 | C7 | DYY | -0.01126 | -0.02055 | -0.00698 | -0.00053 | -0.01454 |
| 107 | C7 | DZZ | 0.00088  | 0.00455  | -0.00472 | -0.01230 | -0.00298 |
| 108 | C7 | DXY | -0.01101 | 0.02891  | 0.00265  | 0.01457  | 0.00110  |
| 109 | C7 | DXZ | 0.00000  | 0.00000  | 0.00000  | 0.00000  | 0.00000  |
| 110 | C7 | DYZ | 0.00000  | 0.00000  | 0.00000  | 0.00000  | 0.00000  |
| 111 | H3 | S   | 0.00711  | -0.10122 | 0.11400  | -0.03964 | -0.00977 |
| 112 | H3 | S   | -0.50993 | -0.03714 | -0.06424 | 0.34488  | 0.32379  |
| 113 | H3 | PX  | -0.01818 | -0.00403 | 0.00786  | -0.01217 | -0.00901 |
| 114 | H3 | PY  | 0.01037  | -0.00687 | 0.00387  | 0.00195  | 0.00038  |
| 115 | H3 | PZ  | 0.00000  | 0.00000  | 0.00000  | 0.00000  | 0.00000  |
| 116 | H4 | S   | 0.02602  | -0.09449 | 0.10061  | -0.04628 | 0.06360  |
| 117 | H4 | S   | -0.44439 | 0.24494  | -0.15707 | -0.20638 | -0.34633 |
| 118 | H4 | PX  | 0.01891  | 0.00824  | -0.01045 | 0.00430  | 0.00587  |
| 119 | H4 | PY  | 0.01362  | -0.00674 | 0.00305  | 0.00022  | 0.01481  |
| 120 | H4 | PZ  | 0.00000  | 0.00000  | 0.00000  | 0.00000  | 0.00000  |

|     |     |     |          |          |          |          |          |
|-----|-----|-----|----------|----------|----------|----------|----------|
| 121 | N1  | S   | -0.02228 | 0.06133  | -0.08276 | -0.01170 | 0.00584  |
| 122 | N1  | S   | 0.04651  | -0.02315 | 0.04549  | 0.00476  | -0.01860 |
| 123 | N1  | PX  | -0.00062 | -0.07276 | 0.01197  | 0.07515  | -0.14493 |
| 124 | N1  | PY  | 0.04381  | 0.12835  | 0.14395  | -0.06739 | 0.28232  |
| 125 | N1  | PZ  | 0.00000  | 0.00000  | 0.00000  | 0.00000  | 0.00000  |
| 126 | N1  | S   | 0.14259  | -2.01169 | 2.67197  | 0.13945  | 0.58854  |
| 127 | N1  | PX  | -0.18583 | -0.73939 | 0.66788  | -0.05580 | -0.29675 |
| 128 | N1  | PY  | -0.01099 | -0.38253 | 0.78200  | -0.00207 | 1.81568  |
| 129 | N1  | PZ  | 0.00000  | 0.00000  | 0.00000  | 0.00000  | 0.00000  |
| 130 | N1  | DXX | 0.00476  | -0.00067 | 0.00653  | 0.01356  | -0.00056 |
| 131 | N1  | DYY | -0.01821 | -0.01137 | 0.00387  | -0.02093 | 0.04100  |
| 132 | N1  | DZZ | -0.00238 | 0.03768  | -0.04988 | -0.00321 | -0.01273 |
| 133 | N1  | DXY | 0.01781  | -0.00948 | -0.00661 | -0.02618 | -0.01922 |
| 134 | N1  | DXZ | 0.00000  | 0.00000  | 0.00000  | 0.00000  | 0.00000  |
| 135 | N1  | DYZ | 0.00000  | 0.00000  | 0.00000  | 0.00000  | 0.00000  |
| 136 | H6  | S   | 0.04367  | 0.00382  | 0.07110  | -0.12393 | 0.11181  |
| 137 | H6  | S   | 0.59411  | -0.17236 | -0.52972 | 0.39123  | -0.17694 |
| 138 | H6  | PX  | -0.00128 | -0.00041 | -0.00757 | 0.01284  | -0.01239 |
| 139 | H6  | PY  | -0.00813 | 0.00467  | 0.00335  | -0.00799 | 0.00495  |
| 140 | H6  | PZ  | 0.00000  | 0.00000  | 0.00000  | 0.00000  | 0.00000  |
| 141 | C8  | S   | 0.02609  | -0.02933 | 0.02608  | -0.04696 | -0.04975 |
| 142 | C8  | S   | -0.04201 | -0.02565 | 0.12892  | 0.05560  | -0.06999 |
| 143 | C8  | PX  | 0.08527  | 0.06016  | 0.02942  | 0.09293  | -0.35871 |
| 144 | C8  | PY  | -0.01766 | 0.23805  | 0.13554  | 0.15765  | 0.16002  |
| 145 | C8  | PZ  | 0.00000  | 0.00000  | 0.00000  | 0.00000  | 0.00000  |
| 146 | C8  | S   | 0.20217  | -0.87336 | -1.81052 | 0.64377  | 0.68897  |
| 147 | C8  | PX  | 0.55610  | -0.13349 | 0.76425  | 1.41909  | -2.01277 |
| 148 | C8  | PY  | 0.13151  | 2.87915  | 0.98822  | 1.28746  | 0.28063  |
| 149 | C8  | PZ  | 0.00000  | 0.00000  | 0.00000  | 0.00000  | 0.00000  |
| 150 | C8  | DXX | -0.00495 | -0.02009 | -0.00486 | -0.00558 | -0.02052 |
| 151 | C8  | DYY | 0.03447  | -0.03555 | 0.02023  | -0.01773 | -0.05226 |
| 152 | C8  | DZZ | -0.00802 | 0.01797  | 0.00051  | 0.01688  | 0.02682  |
| 153 | C8  | DXY | 0.00745  | 0.00436  | 0.01138  | -0.04858 | 0.01696  |
| 154 | C8  | DXZ | 0.00000  | 0.00000  | 0.00000  | 0.00000  | 0.00000  |
| 155 | C8  | DYZ | 0.00000  | 0.00000  | 0.00000  | 0.00000  | 0.00000  |
| 156 | H8  | S   | 0.02982  | 0.00081  | 0.02173  | -0.01617 | -0.10895 |
| 157 | H8  | S   | -0.43863 | -0.08131 | 0.02113  | -0.76945 | -0.34375 |
| 158 | H8  | PX  | 0.00627  | 0.00537  | 0.00725  | 0.00138  | -0.00821 |
| 159 | H8  | PY  | 0.00107  | 0.01832  | 0.00665  | 0.00194  | -0.01240 |
| 160 | H8  | PZ  | 0.00000  | 0.00000  | 0.00000  | 0.00000  | 0.00000  |
| 161 | C10 | S   | -0.00872 | -0.03329 | -0.03234 | -0.00186 | 0.00353  |
| 162 | C10 | S   | 0.06738  | -0.10696 | 0.05772  | -0.09036 | -0.18689 |
| 163 | C10 | PX  | 0.01291  | 0.02814  | 0.02298  | -0.13784 | -0.08461 |
| 164 | C10 | PY  | 0.10221  | -0.07966 | 0.09318  | -0.09325 | -0.16797 |
| 165 | C10 | PZ  | 0.00000  | 0.00000  | 0.00000  | 0.00000  | 0.00000  |
| 166 | C10 | S   | -0.09196 | 2.55093  | 1.12400  | 0.93862  | 0.18108  |
| 167 | C10 | PX  | -0.34665 | 0.23721  | -0.21923 | -0.54354 | 1.13862  |
| 168 | C10 | PY  | 0.22986  | 2.06353  | 1.52188  | 0.74524  | 0.07089  |
| 169 | C10 | PZ  | 0.00000  | 0.00000  | 0.00000  | 0.00000  | 0.00000  |
| 170 | C10 | DXX | 0.00556  | 0.00709  | 0.02336  | 0.00673  | -0.03029 |
| 171 | C10 | DYY | -0.00882 | -0.00140 | -0.00240 | -0.00973 | -0.01333 |
| 172 | C10 | DZZ | 0.00532  | -0.00772 | -0.00388 | -0.00467 | 0.00089  |
| 173 | C10 | DXY | 0.00052  | -0.01686 | 0.00238  | 0.06286  | -0.03737 |
| 174 | C10 | DXZ | 0.00000  | 0.00000  | 0.00000  | 0.00000  | 0.00000  |



|     |     |     |          |          |          |          |          |
|-----|-----|-----|----------|----------|----------|----------|----------|
| 175 | C10 | DYZ | 0.00000  | 0.00000  | 0.00000  | 0.00000  | 0.00000  |
| 176 | H16 | S   | 0.01826  | 0.11310  | 0.06227  | -0.14365 | 0.02553  |
| 177 | H16 | S   | 0.40690  | 0.18864  | 0.56184  | 0.59776  | -0.71765 |
| 178 | H16 | PX  | -0.00078 | 0.00080  | 0.00418  | 0.00315  | 0.00502  |
| 179 | H16 | PY  | 0.00265  | -0.00269 | 0.00703  | 0.01687  | -0.00467 |
| 180 | H16 | PZ  | 0.00000  | 0.00000  | 0.00000  | 0.00000  | 0.00000  |
| 181 | H18 | S   | -0.00361 | 0.01194  | 0.07839  | 0.19555  | -0.04932 |
| 182 | H18 | S   | -0.05706 | 0.32387  | 0.25862  | -0.44740 | 0.65254  |
| 183 | H18 | PX  | -0.00321 | -0.00304 | -0.00510 | 0.00127  | 0.01650  |
| 184 | H18 | PY  | 0.00184  | 0.01122  | -0.00218 | -0.01648 | 0.00925  |
| 185 | H18 | PZ  | 0.00000  | 0.00000  | 0.00000  | 0.00000  | 0.00000  |

|              |          |          |          |          |          |
|--------------|----------|----------|----------|----------|----------|
| MO:          | 56       | 57       | 58       | 59       | 60       |
| Eigenvalues: | 0.69523  | 0.71512  | 0.73307  | 0.74791  | 0.76776  |
| (ev):        | 18.91831 | 19.45933 | 19.94784 | 20.35166 | 20.89194 |

|    |    | A   | A        | A        | A        | A        |          |
|----|----|-----|----------|----------|----------|----------|----------|
| 1  | H1 | S   | 0.06892  | 0.05056  | 0.00000  | 0.14966  | 0.00000  |
| 2  | H1 | S   | 0.29864  | -0.17617 | 0.00000  | 0.08336  | 0.00000  |
| 3  | H1 | PX  | -0.00441 | -0.00809 | 0.00000  | 0.01080  | 0.00000  |
| 4  | H1 | PY  | -0.00333 | -0.00225 | 0.00000  | -0.00042 | 0.00000  |
| 5  | H1 | PZ  | 0.00000  | 0.00000  | -0.00573 | 0.00000  | 0.00050  |
| 6  | C1 | S   | -0.01403 | -0.02018 | 0.00000  | 0.00099  | 0.00000  |
| 7  | C1 | S   | -0.04470 | -0.37082 | 0.00000  | 0.32524  | 0.00000  |
| 8  | C1 | PX  | 0.07418  | 0.14509  | 0.00000  | -0.04744 | 0.00000  |
| 9  | C1 | PY  | -0.28108 | 0.25823  | 0.00000  | 0.01106  | 0.00000  |
| 10 | C1 | PZ  | 0.00000  | 0.00000  | -0.44924 | 0.00000  | -0.14109 |
| 11 | C1 | S   | 0.02882  | 1.04424  | 0.00000  | -0.29038 | 0.00000  |
| 12 | C1 | PX  | -0.66667 | -0.29101 | 0.00000  | -0.21613 | 0.00000  |
| 13 | C1 | PY  | 1.41642  | -0.24273 | 0.00000  | 1.16566  | 0.00000  |
| 14 | C1 | PZ  | 0.00000  | 0.00000  | 0.35965  | 0.00000  | 0.11240  |
| 15 | C1 | DXX | 0.01206  | -0.01105 | 0.00000  | 0.06760  | 0.00000  |
| 16 | C1 | DYY | -0.03354 | -0.06484 | 0.00000  | 0.03000  | 0.00000  |
| 17 | C1 | DZZ | 0.00899  | -0.00591 | 0.00000  | -0.00817 | 0.00000  |
| 18 | C1 | DXY | -0.01461 | 0.00522  | 0.00000  | -0.00759 | 0.00000  |
| 19 | C1 | DXZ | 0.00000  | 0.00000  | 0.02022  | 0.00000  | 0.01220  |
| 20 | C1 | DYZ | 0.00000  | 0.00000  | -0.01264 | 0.00000  | -0.01092 |
| 21 | C2 | S   | -0.03210 | 0.02347  | 0.00000  | 0.07388  | 0.00000  |
| 22 | C2 | S   | -0.15177 | -0.36041 | 0.00000  | 0.15407  | 0.00000  |
| 23 | C2 | PX  | -0.05113 | -0.22547 | 0.00000  | -0.12185 | 0.00000  |
| 24 | C2 | PY  | -0.09471 | 0.12163  | 0.00000  | 0.32697  | 0.00000  |
| 25 | C2 | PZ  | 0.00000  | 0.00000  | -0.32660 | 0.00000  | -0.30425 |
| 26 | C2 | S   | 0.65352  | -0.07583 | 0.00000  | -1.41985 | 0.00000  |
| 27 | C2 | PX  | 0.07358  | 0.02490  | 0.00000  | -1.00155 | 0.00000  |
| 28 | C2 | PY  | -1.03628 | -0.14639 | 0.00000  | -2.08684 | 0.00000  |
| 29 | C2 | PZ  | 0.00000  | 0.00000  | 0.23266  | 0.00000  | 0.26924  |
| 30 | C2 | DXX | 0.01293  | -0.02333 | 0.00000  | 0.07699  | 0.00000  |
| 31 | C2 | DYY | -0.07004 | -0.03746 | 0.00000  | 0.05271  | 0.00000  |
| 32 | C2 | DZZ | 0.00862  | -0.00710 | 0.00000  | -0.04883 | 0.00000  |
| 33 | C2 | DXY | -0.02542 | 0.02100  | 0.00000  | -0.00095 | 0.00000  |
| 34 | C2 | DXZ | 0.00000  | 0.00000  | -0.01851 | 0.00000  | -0.01468 |
| 35 | C2 | DYZ | 0.00000  | 0.00000  | -0.00779 | 0.00000  | -0.02025 |
| 36 | C3 | S   | 0.05490  | -0.00482 | 0.00000  | 0.06761  | 0.00000  |
| 37 | C3 | S   | -0.14849 | -0.45192 | 0.00000  | 0.21847  | 0.00000  |

|    |    |     |          |          |          |          |          |
|----|----|-----|----------|----------|----------|----------|----------|
| 38 | C3 | PX  | 0.32751  | -0.04370 | 0.00000  | 0.17688  | 0.00000  |
| 39 | C3 | PY  | -0.17304 | -0.03228 | 0.00000  | 0.02240  | 0.00000  |
| 40 | C3 | PZ  | 0.00000  | 0.00000  | -0.34603 | 0.00000  | -0.04261 |
| 41 | C3 | S   | -0.07984 | -0.65097 | 0.00000  | -2.41115 | 0.00000  |
| 42 | C3 | PX  | 1.95298  | -0.47332 | 0.00000  | 1.43583  | 0.00000  |
| 43 | C3 | PY  | 0.08630  | 0.68031  | 0.00000  | 1.69180  | 0.00000  |
| 44 | C3 | PZ  | 0.00000  | 0.00000  | 0.15968  | 0.00000  | 0.05153  |
| 45 | C3 | DXX | -0.00797 | -0.09252 | 0.00000  | 0.06114  | 0.00000  |
| 46 | C3 | DYY | 0.04051  | -0.07811 | 0.00000  | 0.03308  | 0.00000  |
| 47 | C3 | DZZ | -0.02855 | 0.01924  | 0.00000  | -0.03093 | 0.00000  |
| 48 | C3 | DXY | -0.01516 | -0.06829 | 0.00000  | -0.03322 | 0.00000  |
| 49 | C3 | DXZ | 0.00000  | 0.00000  | -0.00453 | 0.00000  | 0.01001  |
| 50 | C3 | DYZ | 0.00000  | 0.00000  | 0.01808  | 0.00000  | -0.02396 |
| 51 | C4 | S   | -0.01808 | 0.02570  | 0.00000  | 0.01678  | 0.00000  |
| 52 | C4 | S   | -0.13015 | -0.30800 | 0.00000  | 0.23331  | 0.00000  |
| 53 | C4 | PX  | -0.10496 | 0.17869  | 0.00000  | 0.00895  | 0.00000  |
| 54 | C4 | PY  | 0.13259  | 0.09501  | 0.00000  | -0.02082 | 0.00000  |
| 55 | C4 | PZ  | 0.00000  | 0.00000  | -0.36051 | 0.00000  | -0.32562 |
| 56 | C4 | S   | -0.24751 | -0.26206 | 0.00000  | -0.97401 | 0.00000  |
| 57 | C4 | PX  | -0.73060 | -0.05359 | 0.00000  | -0.74892 | 0.00000  |
| 58 | C4 | PY  | 0.29531  | 0.54445  | 0.00000  | 0.88838  | 0.00000  |
| 59 | C4 | PZ  | 0.00000  | 0.00000  | 0.24528  | 0.00000  | 0.24418  |
| 60 | C4 | DXX | -0.04454 | -0.05579 | 0.00000  | -0.00217 | 0.00000  |
| 61 | C4 | DYY | -0.01114 | 0.00241  | 0.00000  | 0.05601  | 0.00000  |
| 62 | C4 | DZZ | 0.00818  | -0.00683 | 0.00000  | -0.00964 | 0.00000  |
| 63 | C4 | DXY | 0.03905  | 0.01344  | 0.00000  | 0.02137  | 0.00000  |
| 64 | C4 | DXZ | 0.00000  | 0.00000  | -0.00517 | 0.00000  | 0.00839  |
| 65 | C4 | DYZ | 0.00000  | 0.00000  | 0.02606  | 0.00000  | 0.01110  |
| 66 | C5 | S   | 0.02214  | -0.02895 | 0.00000  | -0.01305 | 0.00000  |
| 67 | C5 | S   | -0.27542 | -0.24873 | 0.00000  | 0.34811  | 0.00000  |
| 68 | C5 | PX  | -0.04278 | -0.15727 | 0.00000  | -0.22806 | 0.00000  |
| 69 | C5 | PY  | 0.21112  | 0.00165  | 0.00000  | -0.22001 | 0.00000  |
| 70 | C5 | PZ  | 0.00000  | 0.00000  | -0.36154 | 0.00000  | -0.34296 |
| 71 | C5 | S   | 0.35755  | 0.68699  | 0.00000  | 1.22494  | 0.00000  |
| 72 | C5 | PX  | -0.87559 | 0.33335  | 0.00000  | -0.49337 | 0.00000  |
| 73 | C5 | PY  | -0.50887 | -0.37321 | 0.00000  | -1.24425 | 0.00000  |
| 74 | C5 | PZ  | 0.00000  | 0.00000  | 0.24772  | 0.00000  | 0.26389  |
| 75 | C5 | DXX | -0.01464 | -0.06171 | 0.00000  | 0.05145  | 0.00000  |
| 76 | C5 | DYY | 0.00199  | -0.02451 | 0.00000  | 0.06159  | 0.00000  |
| 77 | C5 | DZZ | -0.01909 | 0.00915  | 0.00000  | -0.01277 | 0.00000  |
| 78 | C5 | DXY | -0.02784 | -0.01906 | 0.00000  | -0.00284 | 0.00000  |
| 79 | C5 | DXZ | 0.00000  | 0.00000  | 0.00112  | 0.00000  | -0.00556 |
| 80 | C5 | DYZ | 0.00000  | 0.00000  | 0.01626  | 0.00000  | 0.02354  |
| 81 | C6 | S   | -0.00545 | -0.02806 | 0.00000  | -0.07742 | 0.00000  |
| 82 | C6 | S   | -0.25122 | -0.37212 | 0.00000  | 0.41437  | 0.00000  |
| 83 | C6 | PX  | 0.23921  | -0.19009 | 0.00000  | 0.13340  | 0.00000  |
| 84 | C6 | PY  | -0.00234 | -0.16428 | 0.00000  | 0.09667  | 0.00000  |
| 85 | C6 | PZ  | 0.00000  | 0.00000  | -0.37678 | 0.00000  | -0.02906 |
| 86 | C6 | S   | 0.64720  | 1.16243  | 0.00000  | 0.38987  | 0.00000  |
| 87 | C6 | PX  | 2.14425  | -0.47071 | 0.00000  | 1.84528  | 0.00000  |
| 88 | C6 | PY  | -0.40261 | -0.56908 | 0.00000  | 0.08168  | 0.00000  |
| 89 | C6 | PZ  | 0.00000  | 0.00000  | 0.26801  | 0.00000  | -0.03171 |
| 90 | C6 | DXX | -0.08061 | -0.06455 | 0.00000  | 0.01949  | 0.00000  |
| 91 | C6 | DYY | 0.02771  | -0.05692 | 0.00000  | -0.01811 | 0.00000  |

|     |    |     |          |          |          |          |          |
|-----|----|-----|----------|----------|----------|----------|----------|
| 92  | C6 | DZZ | -0.00226 | 0.01152  | 0.00000  | 0.03604  | 0.00000  |
| 93  | C6 | DXY | 0.00708  | 0.05822  | 0.00000  | 0.03933  | 0.00000  |
| 94  | C6 | DXZ | 0.00000  | 0.00000  | 0.00362  | 0.00000  | -0.00944 |
| 95  | C6 | DYZ | 0.00000  | 0.00000  | 0.00235  | 0.00000  | -0.00790 |
| 96  | C7 | S   | 0.02385  | -0.04428 | 0.00000  | -0.03626 | 0.00000  |
| 97  | C7 | S   | -0.02775 | -0.19028 | 0.00000  | 0.13394  | 0.00000  |
| 98  | C7 | PX  | 0.19257  | -0.11429 | 0.00000  | 0.01039  | 0.00000  |
| 99  | C7 | PY  | 0.35878  | -0.01965 | 0.00000  | 0.22222  | 0.00000  |
| 100 | C7 | PZ  | 0.00000  | 0.00000  | -0.38102 | 0.00000  | 0.44797  |
| 101 | C7 | S   | -0.25804 | 1.31888  | 0.00000  | 1.96468  | 0.00000  |
| 102 | C7 | PX  | -0.42660 | -0.47791 | 0.00000  | -1.66957 | 0.00000  |
| 103 | C7 | PY  | -1.53831 | 0.83158  | 0.00000  | 0.46757  | 0.00000  |
| 104 | C7 | PZ  | 0.00000  | 0.00000  | 0.32958  | 0.00000  | -0.36572 |
| 105 | C7 | DXX | -0.00045 | -0.09515 | 0.00000  | -0.00560 | 0.00000  |
| 106 | C7 | DYY | -0.00598 | -0.00290 | 0.00000  | 0.03864  | 0.00000  |
| 107 | C7 | DZZ | -0.00078 | 0.02886  | 0.00000  | 0.00185  | 0.00000  |
| 108 | C7 | DXY | 0.00448  | 0.02512  | 0.00000  | 0.04831  | 0.00000  |
| 109 | C7 | DXZ | 0.00000  | 0.00000  | 0.02057  | 0.00000  | -0.00896 |
| 110 | C7 | DYZ | 0.00000  | 0.00000  | -0.02121 | 0.00000  | 0.00369  |
| 111 | H3 | S   | 0.06727  | 0.08680  | 0.00000  | 0.12979  | 0.00000  |
| 112 | H3 | S   | -0.09535 | -0.37471 | 0.00000  | -0.23099 | 0.00000  |
| 113 | H3 | PX  | 0.00731  | -0.00969 | 0.00000  | -0.00126 | 0.00000  |
| 114 | H3 | PY  | -0.00761 | 0.00602  | 0.00000  | 0.01429  | 0.00000  |
| 115 | H3 | PZ  | 0.00000  | 0.00000  | -0.00284 | 0.00000  | -0.00423 |
| 116 | H4 | S   | 0.13939  | 0.00026  | 0.00000  | 0.13184  | 0.00000  |
| 117 | H4 | S   | -0.23477 | 0.09087  | 0.00000  | 0.38212  | 0.00000  |
| 118 | H4 | PX  | -0.00457 | 0.01121  | 0.00000  | 0.00336  | 0.00000  |
| 119 | H4 | PY  | -0.00095 | -0.00452 | 0.00000  | 0.01497  | 0.00000  |
| 120 | H4 | PZ  | 0.00000  | 0.00000  | -0.00549 | 0.00000  | -0.00087 |
| 121 | N1 | S   | 0.02136  | 0.00883  | 0.00000  | 0.00057  | 0.00000  |
| 122 | N1 | S   | -0.01846 | 0.02293  | 0.00000  | -0.09993 | 0.00000  |
| 123 | N1 | PX  | -0.04600 | 0.14551  | 0.00000  | 0.03780  | 0.00000  |
| 124 | N1 | PY  | 0.15291  | -0.08275 | 0.00000  | -0.05563 | 0.00000  |
| 125 | N1 | PZ  | 0.00000  | 0.00000  | -0.07137 | 0.00000  | 0.09813  |
| 126 | N1 | S   | -1.13260 | -0.24592 | 0.00000  | 0.78941  | 0.00000  |
| 127 | N1 | PX  | -0.99834 | 0.28230  | 0.00000  | 0.07155  | 0.00000  |
| 128 | N1 | PY  | 0.91179  | -0.83174 | 0.00000  | 0.35523  | 0.00000  |
| 129 | N1 | PZ  | 0.00000  | 0.00000  | -0.00110 | 0.00000  | 0.01559  |
| 130 | N1 | DXX | -0.00846 | -0.01597 | 0.00000  | -0.03430 | 0.00000  |
| 131 | N1 | DYY | -0.05156 | 0.02652  | 0.00000  | 0.01989  | 0.00000  |
| 132 | N1 | DZZ | 0.03709  | 0.02474  | 0.00000  | -0.03030 | 0.00000  |
| 133 | N1 | DXY | 0.02937  | -0.01309 | 0.00000  | -0.00167 | 0.00000  |
| 134 | N1 | DXZ | 0.00000  | 0.00000  | -0.01499 | 0.00000  | 0.00211  |
| 135 | N1 | DYZ | 0.00000  | 0.00000  | -0.02203 | 0.00000  | 0.00198  |
| 136 | H6 | S   | 0.05115  | 0.05757  | 0.00000  | 0.25880  | 0.00000  |
| 137 | H6 | S   | -0.23537 | -0.09977 | 0.00000  | -0.51264 | 0.00000  |
| 138 | H6 | PX  | 0.00344  | 0.00853  | 0.00000  | -0.02297 | 0.00000  |
| 139 | H6 | PY  | 0.00654  | -0.00862 | 0.00000  | -0.00749 | 0.00000  |
| 140 | H6 | PZ  | 0.00000  | 0.00000  | -0.00306 | 0.00000  | -0.00292 |
| 141 | C8 | S   | -0.04494 | 0.02663  | 0.00000  | -0.00946 | 0.00000  |
| 142 | C8 | S   | -0.23694 | -0.16566 | 0.00000  | 0.01794  | 0.00000  |
| 143 | C8 | PX  | 0.02283  | -0.03799 | 0.00000  | 0.05385  | 0.00000  |
| 144 | C8 | PY  | -0.00383 | -0.07629 | 0.00000  | 0.06709  | 0.00000  |
| 145 | C8 | PZ  | 0.00000  | 0.00000  | -0.20391 | 0.00000  | 0.34340  |

|     |     |     |          |          |          |          |          |
|-----|-----|-----|----------|----------|----------|----------|----------|
| 146 | C8  | S   | 1.28181  | -0.27566 | 0.00000  | -0.64381 | 0.00000  |
| 147 | C8  | PX  | -1.73367 | 0.53535  | 0.00000  | -0.62412 | 0.00000  |
| 148 | C8  | PY  | 0.47013  | -1.16125 | 0.00000  | -1.29958 | 0.00000  |
| 149 | C8  | PZ  | 0.00000  | 0.00000  | 0.07960  | 0.00000  | -0.24746 |
| 150 | C8  | DXX | -0.07507 | 0.01844  | 0.00000  | 0.01227  | 0.00000  |
| 151 | C8  | DYY | -0.01102 | -0.05602 | 0.00000  | -0.05302 | 0.00000  |
| 152 | C8  | DZZ | 0.02481  | -0.00964 | 0.00000  | 0.01249  | 0.00000  |
| 153 | C8  | DXY | -0.04193 | -0.00375 | 0.00000  | -0.00765 | 0.00000  |
| 154 | C8  | DXZ | 0.00000  | 0.00000  | -0.00908 | 0.00000  | 0.00687  |
| 155 | C8  | DYZ | 0.00000  | 0.00000  | 0.01088  | 0.00000  | -0.03428 |
| 156 | H8  | S   | 0.05962  | -0.27197 | 0.00000  | -0.12523 | 0.00000  |
| 157 | H8  | S   | -0.05290 | 0.46387  | 0.00000  | 0.88067  | 0.00000  |
| 158 | H8  | PX  | 0.00253  | -0.01863 | 0.00000  | -0.00710 | 0.00000  |
| 159 | H8  | PY  | 0.00156  | 0.00543  | 0.00000  | 0.01025  | 0.00000  |
| 160 | H8  | PZ  | 0.00000  | 0.00000  | -0.00396 | 0.00000  | 0.00900  |
| 161 | C10 | S   | 0.00420  | 0.00110  | 0.00000  | 0.00193  | 0.00000  |
| 162 | C10 | S   | -0.18237 | -0.05450 | 0.00000  | -0.12835 | 0.00000  |
| 163 | C10 | PX  | -0.12790 | -0.00977 | 0.00000  | -0.00636 | 0.00000  |
| 164 | C10 | PY  | -0.03164 | -0.10597 | 0.00000  | -0.19341 | 0.00000  |
| 165 | C10 | PZ  | 0.00000  | 0.00000  | -0.27598 | 0.00000  | 0.68377  |
| 166 | C10 | S   | 0.23300  | -0.59333 | 0.00000  | -0.57581 | 0.00000  |
| 167 | C10 | PX  | 0.75928  | -0.16293 | 0.00000  | 0.15531  | 0.00000  |
| 168 | C10 | PY  | -0.46811 | -0.28653 | 0.00000  | -0.15194 | 0.00000  |
| 169 | C10 | PZ  | 0.00000  | 0.00000  | 0.25610  | 0.00000  | -0.61444 |
| 170 | C10 | DXX | -0.04765 | -0.00388 | 0.00000  | -0.01726 | 0.00000  |
| 171 | C10 | DYY | -0.01909 | -0.00160 | 0.00000  | -0.00979 | 0.00000  |
| 172 | C10 | DZZ | 0.01287  | -0.00524 | 0.00000  | -0.00546 | 0.00000  |
| 173 | C10 | DXY | 0.02128  | 0.00131  | 0.00000  | -0.00196 | 0.00000  |
| 174 | C10 | DXZ | 0.00000  | 0.00000  | 0.00207  | 0.00000  | -0.00237 |
| 175 | C10 | DYZ | 0.00000  | 0.00000  | -0.01807 | 0.00000  | 0.03120  |
| 176 | H16 | S   | -0.15906 | -0.02875 | 0.00000  | 0.00884  | 0.00000  |
| 177 | H16 | S   | -0.44672 | -0.00905 | 0.00000  | -0.12542 | 0.00000  |
| 178 | H16 | PX  | -0.00208 | -0.00307 | 0.00000  | -0.00782 | 0.00000  |
| 179 | H16 | PY  | -0.00531 | 0.00737  | 0.00000  | 0.00230  | 0.00000  |
| 180 | H16 | PZ  | 0.00000  | 0.00000  | -0.00309 | 0.00000  | 0.00971  |
| 181 | H18 | S   | -0.04325 | 0.00760  | 0.00000  | -0.01869 | 0.00000  |
| 182 | H18 | S   | 0.10096  | -0.15283 | 0.00000  | 0.03448  | 0.00000  |
| 183 | H18 | PX  | 0.01341  | 0.00378  | 0.00000  | 0.00668  | 0.00000  |
| 184 | H18 | PY  | 0.00313  | 0.00415  | 0.00000  | 0.00689  | 0.00000  |
| 185 | H18 | PZ  | 0.00000  | 0.00000  | -0.00523 | 0.00000  | 0.01258  |

MO:                      61                      62                      63                      64                      65  
Eigenvalues:           0.76851           0.78593           0.79889           0.80783           0.82464  
(ev):                    20.91219           21.38635           21.73883           21.98228           22.43952

|   |    |    | A        | A        | A        | A        | A        |
|---|----|----|----------|----------|----------|----------|----------|
| 1 | H1 | S  | 0.05991  | -0.11608 | 0.29890  | 0.00000  | 0.01014  |
| 2 | H1 | S  | -0.12974 | 0.02067  | 0.14356  | 0.00000  | 0.10166  |
| 3 | H1 | PX | 0.00120  | -0.01357 | 0.02172  | 0.00000  | 0.00253  |
| 4 | H1 | PY | 0.00949  | -0.00180 | -0.00779 | 0.00000  | 0.00281  |
| 5 | H1 | PZ | 0.00000  | 0.00000  | 0.00000  | -0.00107 | 0.00000  |
| 6 | C1 | S  | 0.03518  | 0.01230  | 0.05679  | 0.00000  | 0.00030  |
| 7 | C1 | S  | -0.21685 | -0.34114 | 0.33078  | 0.00000  | 0.24981  |
| 8 | C1 | PX | 0.15041  | 0.12373  | 0.07385  | 0.00000  | -0.07491 |

|    |    |     |          |          |          |          |          |
|----|----|-----|----------|----------|----------|----------|----------|
| 9  | C1 | PY  | 0.26805  | -0.18307 | 0.21346  | 0.00000  | 0.18075  |
| 10 | C1 | PZ  | 0.00000  | 0.00000  | 0.00000  | -0.58788 | 0.00000  |
| 11 | C1 | S   | 0.67258  | -0.09028 | -0.64051 | 0.00000  | -0.05614 |
| 12 | C1 | PX  | -0.17656 | 0.02005  | -0.04877 | 0.00000  | -0.11725 |
| 13 | C1 | PY  | 2.03758  | 0.24443  | -0.41225 | 0.00000  | 0.69911  |
| 14 | C1 | PZ  | 0.00000  | 0.00000  | 0.00000  | 0.59310  | 0.00000  |
| 15 | C1 | DXX | -0.00156 | -0.06352 | 0.09283  | 0.00000  | 0.02034  |
| 16 | C1 | DYY | 0.01995  | -0.01416 | 0.09836  | 0.00000  | 0.03849  |
| 17 | C1 | DZZ | -0.03213 | 0.00360  | -0.04732 | 0.00000  | -0.00515 |
| 18 | C1 | DXY | 0.00483  | -0.03832 | -0.01021 | 0.00000  | 0.01545  |
| 19 | C1 | DXZ | 0.00000  | 0.00000  | 0.00000  | 0.03802  | 0.00000  |
| 20 | C1 | DYZ | 0.00000  | 0.00000  | 0.00000  | -0.00590 | 0.00000  |
| 21 | C2 | S   | -0.02432 | 0.01250  | -0.01235 | 0.00000  | 0.00038  |
| 22 | C2 | S   | 0.23309  | -0.13136 | -0.44045 | 0.00000  | -0.00872 |
| 23 | C2 | PX  | 0.14915  | -0.08899 | -0.14426 | 0.00000  | 0.02245  |
| 24 | C2 | PY  | -0.20283 | 0.37291  | -0.04284 | 0.00000  | 0.11482  |
| 25 | C2 | PZ  | 0.00000  | 0.00000  | 0.00000  | 0.52192  | 0.00000  |
| 26 | C2 | S   | -0.95006 | 0.51333  | 0.51529  | 0.00000  | -0.50906 |
| 27 | C2 | PX  | -0.26676 | 0.06782  | 0.15930  | 0.00000  | -0.53367 |
| 28 | C2 | PY  | -2.09369 | -0.56957 | 0.25999  | 0.00000  | -0.70642 |
| 29 | C2 | PZ  | 0.00000  | 0.00000  | 0.00000  | -0.45809 | 0.00000  |
| 30 | C2 | DXX | 0.01495  | 0.00506  | -0.05273 | 0.00000  | 0.00287  |
| 31 | C2 | DYY | -0.01207 | 0.00797  | -0.07586 | 0.00000  | -0.03393 |
| 32 | C2 | DZZ | 0.02464  | -0.02008 | 0.00905  | 0.00000  | 0.00424  |
| 33 | C2 | DXY | 0.00348  | -0.01290 | 0.00779  | 0.00000  | -0.03250 |
| 34 | C2 | DXZ | 0.00000  | 0.00000  | 0.00000  | 0.03776  | 0.00000  |
| 35 | C2 | DYZ | 0.00000  | 0.00000  | 0.00000  | 0.01545  | 0.00000  |
| 36 | C3 | S   | -0.04843 | 0.00073  | -0.02539 | 0.00000  | 0.02110  |
| 37 | C3 | S   | 0.02213  | -0.11342 | 0.30004  | 0.00000  | -0.34889 |
| 38 | C3 | PX  | 0.15506  | 0.22695  | 0.32955  | 0.00000  | 0.16207  |
| 39 | C3 | PY  | 0.21968  | -0.13916 | -0.00934 | 0.00000  | 0.26772  |
| 40 | C3 | PZ  | 0.00000  | 0.00000  | 0.00000  | -0.17567 | 0.00000  |
| 41 | C3 | S   | -0.13548 | 0.83370  | 0.37374  | 0.00000  | -0.37391 |
| 42 | C3 | PX  | 2.01321  | 0.46891  | -0.22206 | 0.00000  | 0.79824  |
| 43 | C3 | PY  | 0.65258  | -0.32778 | -0.28075 | 0.00000  | 0.51970  |
| 44 | C3 | PZ  | 0.00000  | 0.00000  | 0.00000  | 0.05192  | 0.00000  |
| 45 | C3 | DXX | -0.01428 | 0.03113  | 0.04425  | 0.00000  | -0.03397 |
| 46 | C3 | DYY | -0.06752 | -0.02452 | 0.00152  | 0.00000  | -0.03018 |
| 47 | C3 | DZZ | 0.03503  | -0.01532 | 0.00423  | 0.00000  | -0.00536 |
| 48 | C3 | DXY | -0.00181 | 0.00882  | -0.02496 | 0.00000  | -0.00983 |
| 49 | C3 | DXZ | 0.00000  | 0.00000  | 0.00000  | -0.00633 | 0.00000  |
| 50 | C3 | DYZ | 0.00000  | 0.00000  | 0.00000  | -0.00382 | 0.00000  |
| 51 | C4 | S   | -0.03276 | -0.06260 | 0.02417  | 0.00000  | 0.03767  |
| 52 | C4 | S   | 0.14778  | -0.21561 | 0.16713  | 0.00000  | 0.36071  |
| 53 | C4 | PX  | -0.17058 | -0.10221 | 0.47489  | 0.00000  | -0.05910 |
| 54 | C4 | PY  | -0.06217 | -0.05891 | -0.15641 | 0.00000  | 0.00090  |
| 55 | C4 | PZ  | 0.00000  | 0.00000  | 0.00000  | -0.13304 | 0.00000  |
| 56 | C4 | S   | -0.23467 | 0.48432  | -0.01888 | 0.00000  | -0.94272 |
| 57 | C4 | PX  | -2.25359 | 0.10827  | -0.43034 | 0.00000  | -0.53566 |
| 58 | C4 | PY  | 0.87726  | -0.26304 | 0.08399  | 0.00000  | 0.56644  |
| 59 | C4 | PZ  | 0.00000  | 0.00000  | 0.00000  | 0.15664  | 0.00000  |
| 60 | C4 | DXX | -0.00410 | -0.09848 | 0.05014  | 0.00000  | 0.08308  |
| 61 | C4 | DYY | -0.01067 | -0.08195 | 0.03831  | 0.00000  | 0.06555  |
| 62 | C4 | DZZ | 0.02544  | 0.05163  | -0.03002 | 0.00000  | -0.02827 |

|     |    |     |          |          |          |          |          |
|-----|----|-----|----------|----------|----------|----------|----------|
| 63  | C4 | DXY | -0.00859 | -0.00233 | 0.02950  | 0.00000  | -0.01393 |
| 64  | C4 | DXZ | 0.00000  | 0.00000  | 0.00000  | -0.02396 | 0.00000  |
| 65  | C4 | DYZ | 0.00000  | 0.00000  | 0.00000  | 0.04343  | 0.00000  |
| 66  | C5 | S   | 0.03643  | 0.03050  | -0.03962 | 0.00000  | 0.00419  |
| 67  | C5 | S   | -0.11399 | -0.20239 | -0.17951 | 0.00000  | 0.21878  |
| 68  | C5 | PX  | -0.18873 | -0.35786 | 0.19478  | 0.00000  | 0.18830  |
| 69  | C5 | PY  | 0.03706  | -0.07840 | 0.09287  | 0.00000  | 0.09043  |
| 70  | C5 | PZ  | 0.00000  | 0.00000  | 0.00000  | 0.34910  | 0.00000  |
| 71  | C5 | S   | 0.31822  | 0.18796  | 0.00758  | 0.00000  | 0.20500  |
| 72  | C5 | PX  | -2.17471 | 0.26392  | -0.09872 | 0.00000  | -0.58656 |
| 73  | C5 | PY  | -1.09997 | 0.38681  | -0.10993 | 0.00000  | -0.82696 |
| 74  | C5 | PZ  | 0.00000  | 0.00000  | 0.00000  | -0.36986 | 0.00000  |
| 75  | C5 | DXX | 0.01048  | 0.01401  | -0.08805 | 0.00000  | 0.04865  |
| 76  | C5 | DYY | 0.02344  | -0.01159 | -0.03673 | 0.00000  | 0.04422  |
| 77  | C5 | DZZ | -0.02968 | -0.02197 | 0.03535  | 0.00000  | -0.01261 |
| 78  | C5 | DXY | -0.01620 | 0.01461  | -0.01332 | 0.00000  | 0.02549  |
| 79  | C5 | DXZ | 0.00000  | 0.00000  | 0.00000  | -0.00789 | 0.00000  |
| 80  | C5 | DYZ | 0.00000  | 0.00000  | 0.00000  | -0.04401 | 0.00000  |
| 81  | C6 | S   | 0.04094  | -0.03681 | -0.01770 | 0.00000  | -0.01616 |
| 82  | C6 | S   | 0.02709  | -0.07084 | -0.21298 | 0.00000  | -0.31150 |
| 83  | C6 | PX  | 0.10103  | 0.16601  | 0.08935  | 0.00000  | 0.21875  |
| 84  | C6 | PY  | -0.23438 | 0.17793  | -0.06928 | 0.00000  | 0.27008  |
| 85  | C6 | PZ  | 0.00000  | 0.00000  | 0.00000  | 0.19291  | 0.00000  |
| 86  | C6 | S   | -0.35749 | -0.21110 | 0.39940  | 0.00000  | 0.56985  |
| 87  | C6 | PX  | 2.16678  | 0.35271  | -0.29014 | 0.00000  | 0.75836  |
| 88  | C6 | PY  | 0.06968  | 0.05423  | -0.06311 | 0.00000  | 0.00004  |
| 89  | C6 | PZ  | 0.00000  | 0.00000  | 0.00000  | -0.16094 | 0.00000  |
| 90  | C6 | DXX | 0.00014  | -0.04478 | -0.04952 | 0.00000  | -0.07967 |
| 91  | C6 | DYY | 0.06388  | -0.03907 | -0.02456 | 0.00000  | -0.00960 |
| 92  | C6 | DZZ | -0.02595 | 0.02545  | 0.00944  | 0.00000  | 0.01055  |
| 93  | C6 | DXY | -0.00708 | 0.03447  | 0.01812  | 0.00000  | 0.00545  |
| 94  | C6 | DXZ | 0.00000  | 0.00000  | 0.00000  | -0.01418 | 0.00000  |
| 95  | C6 | DYZ | 0.00000  | 0.00000  | 0.00000  | 0.00633  | 0.00000  |
| 96  | C7 | S   | -0.00847 | 0.02062  | 0.04291  | 0.00000  | -0.07327 |
| 97  | C7 | S   | -0.02395 | 0.32289  | 0.31458  | 0.00000  | -0.21496 |
| 98  | C7 | PX  | -0.08102 | -0.12998 | -0.00519 | 0.00000  | -0.09502 |
| 99  | C7 | PY  | -0.37477 | -0.16599 | -0.03836 | 0.00000  | -0.09360 |
| 100 | C7 | PZ  | 0.00000  | 0.00000  | 0.00000  | -0.37253 | 0.00000  |
| 101 | C7 | S   | 0.45781  | -0.96314 | -0.93216 | 0.00000  | 1.37585  |
| 102 | C7 | PX  | -1.12290 | 0.09062  | 0.17322  | 0.00000  | -0.83369 |
| 103 | C7 | PY  | -0.05217 | -0.66754 | -0.44091 | 0.00000  | -0.02639 |
| 104 | C7 | PZ  | 0.00000  | 0.00000  | 0.00000  | 0.45915  | 0.00000  |
| 105 | C7 | DXX | -0.01951 | 0.06174  | 0.06971  | 0.00000  | -0.08984 |
| 106 | C7 | DYY | 0.01966  | 0.04396  | 0.06946  | 0.00000  | -0.07757 |
| 107 | C7 | DZZ | 0.01182  | -0.00930 | -0.02655 | 0.00000  | 0.05414  |
| 108 | C7 | DXY | 0.02986  | -0.01744 | -0.00031 | 0.00000  | -0.00523 |
| 109 | C7 | DXZ | 0.00000  | 0.00000  | 0.00000  | 0.02397  | 0.00000  |
| 110 | C7 | DYZ | 0.00000  | 0.00000  | 0.00000  | -0.00462 | 0.00000  |
| 111 | H3 | S   | -0.07233 | -0.26365 | 0.20688  | 0.00000  | 0.12707  |
| 112 | H3 | S   | 0.28680  | 0.10060  | 0.01279  | 0.00000  | 0.01806  |
| 113 | H3 | PX  | -0.01079 | -0.01072 | 0.00341  | 0.00000  | 0.00650  |
| 114 | H3 | PY  | 0.00062  | -0.01843 | 0.01285  | 0.00000  | 0.01273  |
| 115 | H3 | PZ  | 0.00000  | 0.00000  | 0.00000  | 0.00736  | 0.00000  |
| 116 | H4 | S   | 0.10487  | 0.03775  | -0.10384 | 0.00000  | 0.02256  |

|     |     |     |          |          |          |          |          |
|-----|-----|-----|----------|----------|----------|----------|----------|
| 117 | H4  | S   | -0.29569 | -0.12719 | -0.01740 | 0.00000  | 0.26542  |
| 118 | H4  | PX  | -0.01109 | 0.00634  | 0.01296  | 0.00000  | -0.00227 |
| 119 | H4  | PY  | 0.00297  | 0.00551  | -0.00784 | 0.00000  | 0.00004  |
| 120 | H4  | PZ  | 0.00000  | 0.00000  | 0.00000  | -0.00496 | 0.00000  |
| 121 | N1  | S   | -0.00680 | -0.00637 | 0.00814  | 0.00000  | -0.01573 |
| 122 | N1  | S   | 0.03420  | -0.01260 | -0.03536 | 0.00000  | 0.06548  |
| 123 | N1  | PX  | 0.11476  | 0.00270  | 0.00582  | 0.00000  | 0.04804  |
| 124 | N1  | PY  | 0.17776  | -0.07229 | 0.02057  | 0.00000  | -0.08110 |
| 125 | N1  | PZ  | 0.00000  | 0.00000  | 0.00000  | 0.13991  | 0.00000  |
| 126 | N1  | S   | 0.25704  | 0.28200  | -0.24964 | 0.00000  | -0.12299 |
| 127 | N1  | PX  | -0.42401 | -0.01856 | -0.04361 | 0.00000  | -0.27302 |
| 128 | N1  | PY  | 0.45209  | 0.36673  | -0.13182 | 0.00000  | 0.57814  |
| 129 | N1  | PZ  | 0.00000  | 0.00000  | 0.00000  | -0.04811 | 0.00000  |
| 130 | N1  | DXX | -0.01365 | 0.01799  | -0.00087 | 0.00000  | 0.03370  |
| 131 | N1  | DYY | -0.00675 | -0.00684 | -0.01325 | 0.00000  | -0.05185 |
| 132 | N1  | DZZ | -0.00883 | -0.01702 | -0.00446 | 0.00000  | 0.03299  |
| 133 | N1  | DXY | 0.04645  | -0.02843 | -0.00342 | 0.00000  | -0.01304 |
| 134 | N1  | DXZ | 0.00000  | 0.00000  | 0.00000  | 0.02228  | 0.00000  |
| 135 | N1  | DYZ | 0.00000  | 0.00000  | 0.00000  | 0.01015  | 0.00000  |
| 136 | H6  | S   | -0.01219 | 0.04159  | -0.05781 | 0.00000  | -0.03581 |
| 137 | H6  | S   | -0.00984 | -0.08132 | -0.11236 | 0.00000  | -0.32330 |
| 138 | H6  | PX  | -0.00139 | -0.00239 | 0.01533  | 0.00000  | 0.00079  |
| 139 | H6  | PY  | -0.00615 | -0.00417 | 0.00364  | 0.00000  | 0.00101  |
| 140 | H6  | PZ  | 0.00000  | 0.00000  | 0.00000  | 0.00086  | 0.00000  |
| 141 | C8  | S   | 0.02530  | 0.03682  | 0.00070  | 0.00000  | 0.06703  |
| 142 | C8  | S   | -0.05389 | 0.50258  | 0.34689  | 0.00000  | -0.13366 |
| 143 | C8  | PX  | 0.15586  | -0.12928 | 0.09555  | 0.00000  | -0.36102 |
| 144 | C8  | PY  | -0.05744 | 0.04710  | 0.04662  | 0.00000  | -0.08220 |
| 145 | C8  | PZ  | 0.00000  | 0.00000  | 0.00000  | 0.16039  | 0.00000  |
| 146 | C8  | S   | -0.18596 | -1.02517 | -0.47459 | 0.00000  | -0.51090 |
| 147 | C8  | PX  | -1.09166 | -0.19790 | -0.10899 | 0.00000  | -0.66399 |
| 148 | C8  | PY  | -0.34133 | 0.33978  | 0.26550  | 0.00000  | 0.13407  |
| 149 | C8  | PZ  | 0.00000  | 0.00000  | 0.00000  | -0.22468 | 0.00000  |
| 150 | C8  | DXX | 0.02613  | 0.06572  | 0.03360  | 0.00000  | -0.01821 |
| 151 | C8  | DYY | 0.01399  | 0.09046  | 0.03951  | 0.00000  | 0.06569  |
| 152 | C8  | DZZ | -0.01855 | -0.01671 | 0.00292  | 0.00000  | -0.03456 |
| 153 | C8  | DXY | 0.01417  | 0.02237  | 0.00703  | 0.00000  | -0.00203 |
| 154 | C8  | DXZ | 0.00000  | 0.00000  | 0.00000  | -0.02153 | 0.00000  |
| 155 | C8  | DYZ | 0.00000  | 0.00000  | 0.00000  | -0.03083 | 0.00000  |
| 156 | H8  | S   | -0.03991 | 0.14197  | 0.21492  | 0.00000  | -0.23416 |
| 157 | H8  | S   | 0.67699  | -0.08312 | -0.08339 | 0.00000  | 0.36346  |
| 158 | H8  | PX  | -0.00998 | 0.00958  | 0.01275  | 0.00000  | -0.02520 |
| 159 | H8  | PY  | 0.00609  | -0.01824 | -0.01772 | 0.00000  | 0.00061  |
| 160 | H8  | PZ  | 0.00000  | 0.00000  | 0.00000  | -0.00007 | 0.00000  |
| 161 | C10 | S   | -0.00641 | 0.00398  | 0.00904  | 0.00000  | -0.02119 |
| 162 | C10 | S   | 0.04377  | 0.39121  | 0.17676  | 0.00000  | 0.27140  |
| 163 | C10 | PX  | 0.13453  | 0.00494  | 0.04535  | 0.00000  | -0.16104 |
| 164 | C10 | PY  | 0.02747  | 0.19926  | 0.02907  | 0.00000  | 0.37758  |
| 165 | C10 | PZ  | 0.00000  | 0.00000  | 0.00000  | 0.34115  | 0.00000  |
| 166 | C10 | S   | -0.24455 | -0.17521 | -0.04456 | 0.00000  | -0.05458 |
| 167 | C10 | PX  | -0.03174 | 0.17312  | -0.08448 | 0.00000  | 0.83573  |
| 168 | C10 | PY  | -0.20942 | 0.17637  | 0.15154  | 0.00000  | -0.30384 |
| 169 | C10 | PZ  | 0.00000  | 0.00000  | 0.00000  | -0.30962 | 0.00000  |
| 170 | C10 | DXX | -0.01142 | 0.06902  | 0.03575  | 0.00000  | 0.01958  |

|     |     |     |          |          |          |         |          |
|-----|-----|-----|----------|----------|----------|---------|----------|
| 171 | C10 | DYY | 0.00155  | 0.03582  | 0.02595  | 0.00000 | -0.00213 |
| 172 | C10 | DZZ | 0.00465  | -0.00774 | -0.00954 | 0.00000 | 0.02194  |
| 173 | C10 | DXY | -0.05385 | -0.01824 | -0.01393 | 0.00000 | -0.00442 |
| 174 | C10 | DXZ | 0.00000  | 0.00000  | 0.00000  | 0.00760 | 0.00000  |
| 175 | C10 | DYZ | 0.00000  | 0.00000  | 0.00000  | 0.01940 | 0.00000  |
| 176 | H16 | S   | 0.16347  | 0.14141  | 0.12804  | 0.00000 | -0.11169 |
| 177 | H16 | S   | -0.15679 | -0.03245 | 0.04932  | 0.00000 | -0.38744 |
| 178 | H16 | PX  | -0.01158 | 0.01554  | 0.00217  | 0.00000 | 0.02350  |
| 179 | H16 | PY  | -0.01642 | -0.00629 | -0.00842 | 0.00000 | -0.00004 |
| 180 | H16 | PZ  | 0.00000  | 0.00000  | 0.00000  | 0.00567 | 0.00000  |
| 181 | H18 | S   | -0.21554 | 0.10435  | 0.02761  | 0.00000 | 0.05325  |
| 182 | H18 | S   | 0.08728  | 0.25657  | 0.03090  | 0.00000 | 0.42769  |
| 183 | H18 | PX  | -0.00379 | -0.01009 | -0.00833 | 0.00000 | 0.00776  |
| 184 | H18 | PY  | 0.01935  | -0.00598 | 0.00054  | 0.00000 | -0.00079 |
| 185 | H18 | PZ  | 0.00000  | 0.00000  | 0.00000  | 0.00229 | 0.00000  |

|              |          |          |          |          |          |
|--------------|----------|----------|----------|----------|----------|
| MO:          | 66       | 67       | 68       | 69       | 70       |
| Eigenvalues: | 0.83599  | 0.83701  | 0.87468  | 0.88089  | 0.89452  |
| (ev):        | 22.74835 | 22.77633 | 23.80135 | 23.97035 | 24.34108 |

|    |    | A   | A        | A        | A        | A        |          |
|----|----|-----|----------|----------|----------|----------|----------|
| 1  | H1 | S   | 0.00000  | 0.20055  | 0.00000  | 0.14232  | 0.00000  |
| 2  | H1 | S   | 0.00000  | -0.11086 | 0.00000  | -0.14291 | 0.00000  |
| 3  | H1 | PX  | 0.00000  | 0.00531  | 0.00000  | 0.01066  | 0.00000  |
| 4  | H1 | PY  | 0.00000  | 0.00166  | 0.00000  | -0.00683 | 0.00000  |
| 5  | H1 | PZ  | -0.00546 | 0.00000  | 0.00406  | 0.00000  | -0.00071 |
| 6  | C1 | S   | 0.00000  | 0.02281  | 0.00000  | 0.05224  | 0.00000  |
| 7  | C1 | S   | 0.00000  | -0.10687 | 0.00000  | -0.02612 | 0.00000  |
| 8  | C1 | PX  | 0.00000  | 0.15149  | 0.00000  | 0.11407  | 0.00000  |
| 9  | C1 | PY  | 0.00000  | 0.07182  | 0.00000  | -0.09651 | 0.00000  |
| 10 | C1 | PZ  | 0.16669  | 0.00000  | -0.01395 | 0.00000  | 0.52113  |
| 11 | C1 | S   | 0.00000  | -0.28064 | 0.00000  | -0.50442 | 0.00000  |
| 12 | C1 | PX  | 0.00000  | -0.00263 | 0.00000  | 0.27558  | 0.00000  |
| 13 | C1 | PY  | 0.00000  | -0.99505 | 0.00000  | -0.31963 | 0.00000  |
| 14 | C1 | PZ  | -0.15049 | 0.00000  | -0.07650 | 0.00000  | -0.73907 |
| 15 | C1 | DXX | 0.00000  | 0.03634  | 0.00000  | 0.03473  | 0.00000  |
| 16 | C1 | DYY | 0.00000  | -0.02185 | 0.00000  | 0.06406  | 0.00000  |
| 17 | C1 | DZZ | 0.00000  | -0.02489 | 0.00000  | -0.04050 | 0.00000  |
| 18 | C1 | DXY | 0.00000  | 0.01447  | 0.00000  | -0.01660 | 0.00000  |
| 19 | C1 | DXZ | -0.02963 | 0.00000  | 0.01591  | 0.00000  | -0.01003 |
| 20 | C1 | DYZ | 0.03202  | 0.00000  | 0.00543  | 0.00000  | -0.01361 |
| 21 | C2 | S   | 0.00000  | -0.00282 | 0.00000  | 0.05035  | 0.00000  |
| 22 | C2 | S   | 0.00000  | 0.32734  | 0.00000  | 0.04501  | 0.00000  |
| 23 | C2 | PX  | 0.00000  | -0.02360 | 0.00000  | -0.09239 | 0.00000  |
| 24 | C2 | PY  | 0.00000  | 0.20807  | 0.00000  | -0.10213 | 0.00000  |
| 25 | C2 | PZ  | -0.27576 | 0.00000  | 0.17101  | 0.00000  | 0.55619  |
| 26 | C2 | S   | 0.00000  | 0.54544  | 0.00000  | -0.33323 | 0.00000  |
| 27 | C2 | PX  | 0.00000  | 0.83284  | 0.00000  | -0.17832 | 0.00000  |
| 28 | C2 | PY  | 0.00000  | 1.53212  | 0.00000  | 0.20514  | 0.00000  |
| 29 | C2 | PZ  | 0.26295  | 0.00000  | -0.27645 | 0.00000  | -0.80710 |
| 30 | C2 | DXX | 0.00000  | 0.06294  | 0.00000  | 0.03290  | 0.00000  |
| 31 | C2 | DYY | 0.00000  | 0.03194  | 0.00000  | 0.08164  | 0.00000  |
| 32 | C2 | DZZ | 0.00000  | -0.00554 | 0.00000  | -0.03814 | 0.00000  |
| 33 | C2 | DXY | 0.00000  | -0.01728 | 0.00000  | 0.01187  | 0.00000  |



|    |    |     |          |          |          |          |          |
|----|----|-----|----------|----------|----------|----------|----------|
| 34 | C2 | DXZ | -0.01613 | 0.00000  | 0.03340  | 0.00000  | 0.00266  |
| 35 | C2 | DYZ | 0.02251  | 0.00000  | 0.03468  | 0.00000  | -0.01284 |
| 36 | C3 | S   | 0.00000  | -0.06709 | 0.00000  | -0.01104 | 0.00000  |
| 37 | C3 | S   | 0.00000  | -0.15839 | 0.00000  | 0.09521  | 0.00000  |
| 38 | C3 | PX  | 0.00000  | 0.11752  | 0.00000  | 0.06427  | 0.00000  |
| 39 | C3 | PY  | 0.00000  | -0.04420 | 0.00000  | 0.21209  | 0.00000  |
| 40 | C3 | PZ  | -0.30209 | 0.00000  | -0.12239 | 0.00000  | -0.07142 |
| 41 | C3 | S   | 0.00000  | 1.54306  | 0.00000  | 0.02160  | 0.00000  |
| 42 | C3 | PX  | 0.00000  | -1.32054 | 0.00000  | -0.34329 | 0.00000  |
| 43 | C3 | PY  | 0.00000  | -0.84248 | 0.00000  | -0.17328 | 0.00000  |
| 44 | C3 | PZ  | 0.26232  | 0.00000  | 0.09488  | 0.00000  | 0.16903  |
| 45 | C3 | DXX | 0.00000  | -0.09110 | 0.00000  | -0.00772 | 0.00000  |
| 46 | C3 | DYY | 0.00000  | -0.04627 | 0.00000  | 0.02279  | 0.00000  |
| 47 | C3 | DZZ | 0.00000  | 0.04646  | 0.00000  | 0.00729  | 0.00000  |
| 48 | C3 | DXY | 0.00000  | -0.00364 | 0.00000  | -0.00348 | 0.00000  |
| 49 | C3 | DXZ | 0.01060  | 0.00000  | 0.00603  | 0.00000  | -0.00662 |
| 50 | C3 | DYZ | 0.02013  | 0.00000  | -0.04260 | 0.00000  | 0.02935  |
| 51 | C4 | S   | 0.00000  | -0.00608 | 0.00000  | -0.04227 | 0.00000  |
| 52 | C4 | S   | 0.00000  | 0.38371  | 0.00000  | -0.11712 | 0.00000  |
| 53 | C4 | PX  | 0.00000  | -0.16223 | 0.00000  | 0.26490  | 0.00000  |
| 54 | C4 | PY  | 0.00000  | 0.02338  | 0.00000  | -0.19198 | 0.00000  |
| 55 | C4 | PZ  | 0.57755  | 0.00000  | -0.32873 | 0.00000  | -0.33756 |
| 56 | C4 | S   | 0.00000  | -0.36671 | 0.00000  | 0.61047  | 0.00000  |
| 57 | C4 | PX  | 0.00000  | 1.00015  | 0.00000  | 0.07520  | 0.00000  |
| 58 | C4 | PY  | 0.00000  | -0.86988 | 0.00000  | -0.19017 | 0.00000  |
| 59 | C4 | PZ  | -0.61064 | 0.00000  | 0.52083  | 0.00000  | 0.42013  |
| 60 | C4 | DXX | 0.00000  | 0.02924  | 0.00000  | -0.05101 | 0.00000  |
| 61 | C4 | DYY | 0.00000  | 0.07328  | 0.00000  | -0.07426 | 0.00000  |
| 62 | C4 | DZZ | 0.00000  | 0.00036  | 0.00000  | 0.03522  | 0.00000  |
| 63 | C4 | DXY | 0.00000  | 0.03448  | 0.00000  | 0.01735  | 0.00000  |
| 64 | C4 | DXZ | -0.01772 | 0.00000  | -0.01448 | 0.00000  | 0.04242  |
| 65 | C4 | DYZ | -0.03650 | 0.00000  | -0.00259 | 0.00000  | -0.00950 |
| 66 | C5 | S   | 0.00000  | 0.06061  | 0.00000  | -0.03861 | 0.00000  |
| 67 | C5 | S   | 0.00000  | 0.37205  | 0.00000  | -0.11149 | 0.00000  |
| 68 | C5 | PX  | 0.00000  | -0.07039 | 0.00000  | -0.24202 | 0.00000  |
| 69 | C5 | PY  | 0.00000  | 0.10652  | 0.00000  | -0.19766 | 0.00000  |
| 70 | C5 | PZ  | 0.18310  | 0.00000  | 0.53025  | 0.00000  | -0.49041 |
| 71 | C5 | S   | 0.00000  | -1.70309 | 0.00000  | 0.43218  | 0.00000  |
| 72 | C5 | PX  | 0.00000  | 1.29060  | 0.00000  | 0.40601  | 0.00000  |
| 73 | C5 | PY  | 0.00000  | 1.01284  | 0.00000  | 0.14072  | 0.00000  |
| 74 | C5 | PZ  | -0.12685 | 0.00000  | -0.67911 | 0.00000  | 0.65708  |
| 75 | C5 | DXX | 0.00000  | 0.09289  | 0.00000  | -0.04702 | 0.00000  |
| 76 | C5 | DYY | 0.00000  | 0.10681  | 0.00000  | -0.07467 | 0.00000  |
| 77 | C5 | DZZ | 0.00000  | -0.05648 | 0.00000  | 0.03144  | 0.00000  |
| 78 | C5 | DXY | 0.00000  | -0.04313 | 0.00000  | -0.01582 | 0.00000  |
| 79 | C5 | DXZ | 0.03430  | 0.00000  | 0.00367  | 0.00000  | -0.04153 |
| 80 | C5 | DYZ | 0.00457  | 0.00000  | -0.03828 | 0.00000  | -0.01207 |
| 81 | C6 | S   | 0.00000  | -0.00495 | 0.00000  | 0.00123  | 0.00000  |
| 82 | C6 | S   | 0.00000  | -0.35410 | 0.00000  | 0.02761  | 0.00000  |
| 83 | C6 | PX  | 0.00000  | -0.43917 | 0.00000  | -0.19788 | 0.00000  |
| 84 | C6 | PY  | 0.00000  | 0.01311  | 0.00000  | 0.24924  | 0.00000  |
| 85 | C6 | PZ  | -0.39316 | 0.00000  | -0.56031 | 0.00000  | -0.04509 |
| 86 | C6 | S   | 0.00000  | 0.71989  | 0.00000  | 0.00188  | 0.00000  |
| 87 | C6 | PX  | 0.00000  | -1.30302 | 0.00000  | 0.00726  | 0.00000  |

|     |    |     |          |          |          |          |          |
|-----|----|-----|----------|----------|----------|----------|----------|
| 88  | C6 | PY  | 0.00000  | -0.41065 | 0.00000  | -0.08424 | 0.00000  |
| 89  | C6 | PZ  | 0.33809  | 0.00000  | 0.79605  | 0.00000  | 0.17120  |
| 90  | C6 | DXX | 0.00000  | -0.07410 | 0.00000  | 0.00325  | 0.00000  |
| 91  | C6 | DYY | 0.00000  | -0.03062 | 0.00000  | 0.02403  | 0.00000  |
| 92  | C6 | DZZ | 0.00000  | 0.00703  | 0.00000  | -0.00430 | 0.00000  |
| 93  | C6 | DXY | 0.00000  | 0.00666  | 0.00000  | -0.00514 | 0.00000  |
| 94  | C6 | DXZ | -0.00328 | 0.00000  | -0.00138 | 0.00000  | 0.00345  |
| 95  | C6 | DYZ | -0.02061 | 0.00000  | 0.02021  | 0.00000  | 0.00633  |
| 96  | C7 | S   | 0.00000  | 0.05248  | 0.00000  | -0.00212 | 0.00000  |
| 97  | C7 | S   | 0.00000  | -0.05708 | 0.00000  | -0.00320 | 0.00000  |
| 98  | C7 | PX  | 0.00000  | 0.06606  | 0.00000  | -0.04018 | 0.00000  |
| 99  | C7 | PY  | 0.00000  | -0.04466 | 0.00000  | 0.01517  | 0.00000  |
| 100 | C7 | PZ  | -0.36241 | 0.00000  | 0.52867  | 0.00000  | -0.21095 |
| 101 | C7 | S   | 0.00000  | -1.42772 | 0.00000  | -0.01715 | 0.00000  |
| 102 | C7 | PX  | 0.00000  | 1.13778  | 0.00000  | 0.27458  | 0.00000  |
| 103 | C7 | PY  | 0.00000  | -0.19293 | 0.00000  | -0.00754 | 0.00000  |
| 104 | C7 | PZ  | 0.33142  | 0.00000  | -0.79236 | 0.00000  | 0.07472  |
| 105 | C7 | DXX | 0.00000  | 0.02924  | 0.00000  | 0.03616  | 0.00000  |
| 106 | C7 | DYY | 0.00000  | 0.00599  | 0.00000  | -0.04151 | 0.00000  |
| 107 | C7 | DZZ | 0.00000  | -0.01575 | 0.00000  | 0.00180  | 0.00000  |
| 108 | C7 | DXY | 0.00000  | -0.02913 | 0.00000  | -0.01761 | 0.00000  |
| 109 | C7 | DXZ | 0.01769  | 0.00000  | -0.03219 | 0.00000  | 0.00798  |
| 110 | C7 | DYZ | -0.00664 | 0.00000  | 0.00908  | 0.00000  | -0.00156 |
| 111 | H3 | S   | 0.00000  | 0.19336  | 0.00000  | -0.17011 | 0.00000  |
| 112 | H3 | S   | 0.00000  | 0.19096  | 0.00000  | 0.05687  | 0.00000  |
| 113 | H3 | PX  | 0.00000  | 0.00694  | 0.00000  | -0.00434 | 0.00000  |
| 114 | H3 | PY  | 0.00000  | 0.00892  | 0.00000  | -0.01328 | 0.00000  |
| 115 | H3 | PZ  | -0.00246 | 0.00000  | -0.00398 | 0.00000  | -0.00016 |
| 116 | H4 | S   | 0.00000  | 0.40178  | 0.00000  | -0.16205 | 0.00000  |
| 117 | H4 | S   | 0.00000  | -0.08079 | 0.00000  | 0.04049  | 0.00000  |
| 118 | H4 | PX  | 0.00000  | -0.00888 | 0.00000  | 0.00756  | 0.00000  |
| 119 | H4 | PY  | 0.00000  | 0.02242  | 0.00000  | -0.01093 | 0.00000  |
| 120 | H4 | PZ  | 0.00048  | 0.00000  | -0.00492 | 0.00000  | -0.00082 |
| 121 | N1 | S   | 0.00000  | 0.00915  | 0.00000  | -0.01488 | 0.00000  |
| 122 | N1 | S   | 0.00000  | 0.00693  | 0.00000  | 0.04598  | 0.00000  |
| 123 | N1 | PX  | 0.00000  | -0.00587 | 0.00000  | 0.07943  | 0.00000  |
| 124 | N1 | PY  | 0.00000  | -0.04256 | 0.00000  | -0.07013 | 0.00000  |
| 125 | N1 | PZ  | -0.06538 | 0.00000  | -0.18773 | 0.00000  | 0.06906  |
| 126 | N1 | S   | 0.00000  | -0.86845 | 0.00000  | -0.15173 | 0.00000  |
| 127 | N1 | PX  | 0.00000  | 0.00823  | 0.00000  | -0.08686 | 0.00000  |
| 128 | N1 | PY  | 0.00000  | -0.74596 | 0.00000  | 0.06801  | 0.00000  |
| 129 | N1 | PZ  | -0.01559 | 0.00000  | -0.06651 | 0.00000  | -0.21476 |
| 130 | N1 | DXX | 0.00000  | -0.02254 | 0.00000  | 0.00381  | 0.00000  |
| 131 | N1 | DYY | 0.00000  | -0.01756 | 0.00000  | -0.04320 | 0.00000  |
| 132 | N1 | DZZ | 0.00000  | 0.03827  | 0.00000  | 0.02264  | 0.00000  |
| 133 | N1 | DXY | 0.00000  | 0.01318  | 0.00000  | 0.01978  | 0.00000  |
| 134 | N1 | DXZ | -0.01319 | 0.00000  | -0.03617 | 0.00000  | 0.00032  |
| 135 | N1 | DYZ | -0.00618 | 0.00000  | -0.02831 | 0.00000  | 0.00497  |
| 136 | H6 | S   | 0.00000  | 0.19945  | 0.00000  | 0.13078  | 0.00000  |
| 137 | H6 | S   | 0.00000  | 0.43021  | 0.00000  | -0.07836 | 0.00000  |
| 138 | H6 | PX  | 0.00000  | -0.00596 | 0.00000  | -0.00886 | 0.00000  |
| 139 | H6 | PY  | 0.00000  | 0.00543  | 0.00000  | -0.00277 | 0.00000  |
| 140 | H6 | PZ  | -0.00085 | 0.00000  | -0.00928 | 0.00000  | 0.00251  |
| 141 | C8 | S   | 0.00000  | -0.00031 | 0.00000  | 0.05529  | 0.00000  |

|     |     |     |          |          |          |          |          |
|-----|-----|-----|----------|----------|----------|----------|----------|
| 142 | C8  | S   | 0.00000  | -0.01722 | 0.00000  | -0.44679 | 0.00000  |
| 143 | C8  | PX  | 0.00000  | 0.22020  | 0.00000  | 0.13866  | 0.00000  |
| 144 | C8  | PY  | 0.00000  | -0.07494 | 0.00000  | 0.22849  | 0.00000  |
| 145 | C8  | PZ  | -0.11181 | 0.00000  | -0.35690 | 0.00000  | -0.44388 |
| 146 | C8  | S   | 0.00000  | 0.35443  | 0.00000  | 0.26802  | 0.00000  |
| 147 | C8  | PX  | 0.00000  | 0.62351  | 0.00000  | -0.09761 | 0.00000  |
| 148 | C8  | PY  | 0.00000  | 0.81283  | 0.00000  | 0.24928  | 0.00000  |
| 149 | C8  | PZ  | 0.11319  | 0.00000  | 0.59988  | 0.00000  | 0.65560  |
| 150 | C8  | DXX | 0.00000  | -0.01768 | 0.00000  | -0.06711 | 0.00000  |
| 151 | C8  | DYY | 0.00000  | 0.01161  | 0.00000  | 0.08250  | 0.00000  |
| 152 | C8  | DZZ | 0.00000  | 0.00022  | 0.00000  | -0.03830 | 0.00000  |
| 153 | C8  | DXY | 0.00000  | -0.01543 | 0.00000  | -0.01328 | 0.00000  |
| 154 | C8  | DXZ | -0.00999 | 0.00000  | 0.02066  | 0.00000  | -0.00872 |
| 155 | C8  | DYZ | -0.04163 | 0.00000  | 0.01911  | 0.00000  | -0.01519 |
| 156 | H8  | S   | 0.00000  | 0.24636  | 0.00000  | 0.10738  | 0.00000  |
| 157 | H8  | S   | 0.00000  | -0.59047 | 0.00000  | -0.25350 | 0.00000  |
| 158 | H8  | PX  | 0.00000  | 0.01609  | 0.00000  | 0.01113  | 0.00000  |
| 159 | H8  | PY  | 0.00000  | -0.00899 | 0.00000  | -0.00444 | 0.00000  |
| 160 | H8  | PZ  | -0.00262 | 0.00000  | -0.00824 | 0.00000  | -0.00383 |
| 161 | C10 | S   | 0.00000  | 0.00397  | 0.00000  | -0.07419 | 0.00000  |
| 162 | C10 | S   | 0.00000  | 0.08857  | 0.00000  | -0.27981 | 0.00000  |
| 163 | C10 | PX  | 0.00000  | 0.06888  | 0.00000  | 0.03772  | 0.00000  |
| 164 | C10 | PY  | 0.00000  | 0.08145  | 0.00000  | 0.43199  | 0.00000  |
| 165 | C10 | PZ  | 0.56387  | 0.00000  | 0.08735  | 0.00000  | 0.34323  |
| 166 | C10 | S   | 0.00000  | 0.34978  | 0.00000  | 1.25121  | 0.00000  |
| 167 | C10 | PX  | 0.00000  | -0.43675 | 0.00000  | -0.06015 | 0.00000  |
| 168 | C10 | PY  | 0.00000  | 0.13665  | 0.00000  | -0.37254 | 0.00000  |
| 169 | C10 | PZ  | -0.60810 | 0.00000  | -0.20054 | 0.00000  | -0.52027 |
| 170 | C10 | DXX | 0.00000  | 0.02057  | 0.00000  | -0.09628 | 0.00000  |
| 171 | C10 | DYY | 0.00000  | 0.01595  | 0.00000  | -0.13795 | 0.00000  |
| 172 | C10 | DZZ | 0.00000  | -0.00171 | 0.00000  | 0.07351  | 0.00000  |
| 173 | C10 | DXY | 0.00000  | 0.02671  | 0.00000  | 0.02246  | 0.00000  |
| 174 | C10 | DXZ | 0.00511  | 0.00000  | -0.01296 | 0.00000  | 0.00410  |
| 175 | C10 | DYZ | 0.00615  | 0.00000  | -0.02530 | 0.00000  | -0.01495 |
| 176 | H16 | S   | 0.00000  | 0.00356  | 0.00000  | -0.39026 | 0.00000  |
| 177 | H16 | S   | 0.00000  | 0.29143  | 0.00000  | -0.03889 | 0.00000  |
| 178 | H16 | PX  | 0.00000  | -0.00251 | 0.00000  | -0.00818 | 0.00000  |
| 179 | H16 | PY  | 0.00000  | 0.00043  | 0.00000  | 0.01575  | 0.00000  |
| 180 | H16 | PZ  | 0.00959  | 0.00000  | 0.00064  | 0.00000  | 0.00519  |
| 181 | H18 | S   | 0.00000  | 0.04317  | 0.00000  | -0.31767 | 0.00000  |
| 182 | H18 | S   | 0.00000  | -0.27906 | 0.00000  | -0.22393 | 0.00000  |
| 183 | H18 | PX  | 0.00000  | -0.01317 | 0.00000  | 0.00337  | 0.00000  |
| 184 | H18 | PY  | 0.00000  | -0.00511 | 0.00000  | 0.01219  | 0.00000  |
| 185 | H18 | PZ  | 0.00749  | 0.00000  | 0.00713  | 0.00000  | 0.00333  |

|              |          |          |          |          |          |
|--------------|----------|----------|----------|----------|----------|
| MO:          | 71       | 72       | 73       | 74       | 75       |
| Eigenvalues: | 0.90242  | 0.91918  | 0.94821  | 0.98293  | 0.98712  |
| (ev):        | 24.55622 | 25.01221 | 25.80209 | 26.74691 | 26.86081 |

|   |    |    |          |          |         |         |          |
|---|----|----|----------|----------|---------|---------|----------|
|   |    | A  | A        | A        | A       | A       |          |
| 1 | H1 | S  | 0.10876  | -0.32127 | 0.00000 | 0.00000 | -0.04656 |
| 2 | H1 | S  | -0.28532 | 0.23389  | 0.00000 | 0.00000 | -0.02970 |
| 3 | H1 | PX | 0.00962  | -0.02198 | 0.00000 | 0.00000 | -0.00526 |
| 4 | H1 | PY | -0.00034 | 0.00576  | 0.00000 | 0.00000 | -0.01844 |

|    |    |     |          |          |          |          |          |
|----|----|-----|----------|----------|----------|----------|----------|
| 5  | H1 | PZ  | 0.00000  | 0.00000  | 0.00500  | -0.01694 | 0.00000  |
| 6  | C1 | S   | 0.02685  | -0.07254 | 0.00000  | 0.00000  | -0.00510 |
| 7  | C1 | S   | 0.04034  | -0.14989 | 0.00000  | 0.00000  | -0.01351 |
| 8  | C1 | PX  | 0.06391  | -0.15448 | 0.00000  | 0.00000  | -0.00016 |
| 9  | C1 | PY  | -0.09683 | 0.34820  | 0.00000  | 0.00000  | 0.04053  |
| 10 | C1 | PZ  | 0.00000  | 0.00000  | 0.26789  | 0.47586  | 0.00000  |
| 11 | C1 | S   | -0.61499 | 0.97571  | 0.00000  | 0.00000  | -0.48385 |
| 12 | C1 | PX  | 0.34426  | -0.20229 | 0.00000  | 0.00000  | 0.21290  |
| 13 | C1 | PY  | -1.27150 | 0.25796  | 0.00000  | 0.00000  | -0.59206 |
| 14 | C1 | PZ  | 0.00000  | 0.00000  | -0.35703 | -0.93196 | 0.00000  |
| 15 | C1 | DXX | 0.05916  | -0.11926 | 0.00000  | 0.00000  | -0.01577 |
| 16 | C1 | DYY | 0.00392  | -0.08383 | 0.00000  | 0.00000  | -0.02170 |
| 17 | C1 | DZZ | -0.03984 | 0.07316  | 0.00000  | 0.00000  | 0.01120  |
| 18 | C1 | DXY | 0.01299  | 0.01594  | 0.00000  | 0.00000  | -0.01380 |
| 19 | C1 | DXZ | 0.00000  | 0.00000  | 0.01649  | -0.02479 | 0.00000  |
| 20 | C1 | DYZ | 0.00000  | 0.00000  | -0.03827 | -0.01701 | 0.00000  |
| 21 | C2 | S   | -0.07530 | 0.00593  | 0.00000  | 0.00000  | 0.02445  |
| 22 | C2 | S   | -0.13280 | -0.15014 | 0.00000  | 0.00000  | 0.17521  |
| 23 | C2 | PX  | 0.12504  | -0.07795 | 0.00000  | 0.00000  | 0.00212  |
| 24 | C2 | PY  | 0.41878  | 0.09689  | 0.00000  | 0.00000  | 0.02661  |
| 25 | C2 | PZ  | 0.00000  | 0.00000  | -0.41350 | 0.13724  | 0.00000  |
| 26 | C2 | S   | 0.99729  | 0.33617  | 0.00000  | 0.00000  | -0.38110 |
| 27 | C2 | PX  | 0.17678  | 0.16989  | 0.00000  | 0.00000  | -0.43104 |
| 28 | C2 | PY  | 0.78658  | -0.98130 | 0.00000  | 0.00000  | 0.19883  |
| 29 | C2 | PZ  | 0.00000  | 0.00000  | 0.74379  | -0.22262 | 0.00000  |
| 30 | C2 | DXX | -0.11837 | 0.02052  | 0.00000  | 0.00000  | 0.04397  |
| 31 | C2 | DYY | -0.08868 | -0.02198 | 0.00000  | 0.00000  | 0.03057  |
| 32 | C2 | DZZ | 0.07305  | -0.02951 | 0.00000  | 0.00000  | -0.02539 |
| 33 | C2 | DXY | -0.02516 | -0.02191 | 0.00000  | 0.00000  | -0.04152 |
| 34 | C2 | DXZ | 0.00000  | 0.00000  | -0.01556 | 0.02452  | 0.00000  |
| 35 | C2 | DYZ | 0.00000  | 0.00000  | 0.01489  | 0.00025  | 0.00000  |
| 36 | C3 | S   | 0.01512  | -0.01762 | 0.00000  | 0.00000  | 0.00224  |
| 37 | C3 | S   | 0.28245  | -0.09035 | 0.00000  | 0.00000  | 0.16469  |
| 38 | C3 | PX  | -0.11123 | 0.01728  | 0.00000  | 0.00000  | -0.16227 |
| 39 | C3 | PY  | 0.14009  | -0.43986 | 0.00000  | 0.00000  | -0.15604 |
| 40 | C3 | PZ  | 0.00000  | 0.00000  | 0.56025  | -0.43775 | 0.00000  |
| 41 | C3 | S   | -0.19674 | 0.39895  | 0.00000  | 0.00000  | -0.00414 |
| 42 | C3 | PX  | -1.20394 | 0.43716  | 0.00000  | 0.00000  | -0.11136 |
| 43 | C3 | PY  | -0.53668 | 0.20398  | 0.00000  | 0.00000  | 0.41881  |
| 44 | C3 | PZ  | 0.00000  | 0.00000  | -0.81917 | 0.70397  | 0.00000  |
| 45 | C3 | DXX | 0.05673  | -0.00966 | 0.00000  | 0.00000  | -0.00774 |
| 46 | C3 | DYY | 0.06572  | -0.04906 | 0.00000  | 0.00000  | 0.02983  |
| 47 | C3 | DZZ | -0.02209 | 0.00401  | 0.00000  | 0.00000  | 0.00131  |
| 48 | C3 | DXY | -0.03233 | -0.00198 | 0.00000  | 0.00000  | -0.05777 |
| 49 | C3 | DXZ | 0.00000  | 0.00000  | -0.00520 | 0.03007  | 0.00000  |
| 50 | C3 | DYZ | 0.00000  | 0.00000  | 0.04364  | 0.04918  | 0.00000  |
| 51 | C4 | S   | -0.02588 | 0.06250  | 0.00000  | 0.00000  | 0.00060  |
| 52 | C4 | S   | 0.30672  | -0.13451 | 0.00000  | 0.00000  | -0.03888 |
| 53 | C4 | PX  | -0.20928 | -0.11462 | 0.00000  | 0.00000  | 0.08053  |
| 54 | C4 | PY  | -0.06920 | 0.27754  | 0.00000  | 0.00000  | -0.00945 |
| 55 | C4 | PZ  | 0.00000  | 0.00000  | -0.54962 | -0.25052 | 0.00000  |
| 56 | C4 | S   | 0.06395  | -0.10772 | 0.00000  | 0.00000  | 0.22574  |
| 57 | C4 | PX  | 1.53652  | -0.71437 | 0.00000  | 0.00000  | 0.51758  |
| 58 | C4 | PY  | -0.85746 | 0.34225  | 0.00000  | 0.00000  | -0.14771 |

|     |    |     |          |          |          |          |          |
|-----|----|-----|----------|----------|----------|----------|----------|
| 59  | C4 | PZ  | 0.00000  | 0.00000  | 0.96411  | 0.57750  | 0.00000  |
| 60  | C4 | DXX | 0.01262  | 0.06173  | 0.00000  | 0.00000  | 0.00302  |
| 61  | C4 | DYY | 0.00886  | 0.05909  | 0.00000  | 0.00000  | -0.02407 |
| 62  | C4 | DZZ | 0.02673  | -0.06353 | 0.00000  | 0.00000  | 0.00289  |
| 63  | C4 | DXY | -0.01612 | -0.04124 | 0.00000  | 0.00000  | -0.03349 |
| 64  | C4 | DXZ | 0.00000  | 0.00000  | 0.01263  | -0.00172 | 0.00000  |
| 65  | C4 | DYZ | 0.00000  | 0.00000  | 0.01893  | -0.02192 | 0.00000  |
| 66  | C5 | S   | 0.06101  | -0.00271 | 0.00000  | 0.00000  | -0.02373 |
| 67  | C5 | S   | -0.20009 | 0.28110  | 0.00000  | 0.00000  | 0.06868  |
| 68  | C5 | PX  | 0.03816  | 0.26816  | 0.00000  | 0.00000  | -0.01188 |
| 69  | C5 | PY  | 0.29835  | 0.01844  | 0.00000  | 0.00000  | 0.10344  |
| 70  | C5 | PZ  | 0.00000  | 0.00000  | 0.44202  | 0.11930  | 0.00000  |
| 71  | C5 | S   | -0.16770 | -0.34542 | 0.00000  | 0.00000  | 0.35500  |
| 72  | C5 | PX  | 1.18343  | -1.06551 | 0.00000  | 0.00000  | 0.50113  |
| 73  | C5 | PY  | 0.71700  | -0.44402 | 0.00000  | 0.00000  | -0.43942 |
| 74  | C5 | PZ  | 0.00000  | 0.00000  | -0.90052 | -0.23238 | 0.00000  |
| 75  | C5 | DXX | 0.05139  | 0.02704  | 0.00000  | 0.00000  | 0.00478  |
| 76  | C5 | DYY | 0.04365  | 0.03569  | 0.00000  | 0.00000  | -0.03185 |
| 77  | C5 | DZZ | -0.06117 | 0.01035  | 0.00000  | 0.00000  | 0.01357  |
| 78  | C5 | DXY | 0.06183  | 0.01568  | 0.00000  | 0.00000  | 0.04977  |
| 79  | C5 | DXZ | 0.00000  | 0.00000  | -0.00787 | 0.00596  | 0.00000  |
| 80  | C5 | DYZ | 0.00000  | 0.00000  | 0.02149  | -0.01645 | 0.00000  |
| 81  | C6 | S   | 0.00840  | -0.00476 | 0.00000  | 0.00000  | 0.05463  |
| 82  | C6 | S   | -0.18320 | 0.07920  | 0.00000  | 0.00000  | -0.08835 |
| 83  | C6 | PX  | 0.19225  | 0.01231  | 0.00000  | 0.00000  | 0.02517  |
| 84  | C6 | PY  | -0.22361 | 0.13923  | 0.00000  | 0.00000  | 0.48162  |
| 85  | C6 | PZ  | 0.00000  | 0.00000  | 0.03324  | -0.30240 | 0.00000  |
| 86  | C6 | S   | -0.06381 | -0.64071 | 0.00000  | 0.00000  | 0.32353  |
| 87  | C6 | PX  | -1.36787 | 0.75741  | 0.00000  | 0.00000  | -0.20264 |
| 88  | C6 | PY  | 0.45952  | -0.55305 | 0.00000  | 0.00000  | -0.55792 |
| 89  | C6 | PZ  | 0.00000  | 0.00000  | -0.07166 | 0.35246  | 0.00000  |
| 90  | C6 | DXX | -0.02636 | 0.01159  | 0.00000  | 0.00000  | -0.02266 |
| 91  | C6 | DYY | -0.00654 | 0.00916  | 0.00000  | 0.00000  | 0.15849  |
| 92  | C6 | DZZ | -0.01113 | 0.00224  | 0.00000  | 0.00000  | -0.05903 |
| 93  | C6 | DXY | 0.03932  | 0.01856  | 0.00000  | 0.00000  | 0.06370  |
| 94  | C6 | DXZ | 0.00000  | 0.00000  | 0.01467  | -0.03138 | 0.00000  |
| 95  | C6 | DYZ | 0.00000  | 0.00000  | -0.02461 | 0.01161  | 0.00000  |
| 96  | C7 | S   | -0.01634 | 0.05513  | 0.00000  | 0.00000  | -0.00059 |
| 97  | C7 | S   | 0.31477  | 0.21456  | 0.00000  | 0.00000  | 0.08812  |
| 98  | C7 | PX  | -0.18936 | -0.11211 | 0.00000  | 0.00000  | -0.12482 |
| 99  | C7 | PY  | 0.08389  | -0.14982 | 0.00000  | 0.00000  | 0.10342  |
| 100 | C7 | PZ  | 0.00000  | 0.00000  | -0.48330 | -0.09699 | 0.00000  |
| 101 | C7 | S   | -0.65194 | -0.42519 | 0.00000  | 0.00000  | 0.09534  |
| 102 | C7 | PX  | 0.76867  | 0.30553  | 0.00000  | 0.00000  | 0.49429  |
| 103 | C7 | PY  | 0.42592  | -0.45872 | 0.00000  | 0.00000  | -0.51400 |
| 104 | C7 | PZ  | 0.00000  | 0.00000  | 0.82834  | 0.24976  | 0.00000  |
| 105 | C7 | DXX | 0.00153  | 0.09548  | 0.00000  | 0.00000  | -0.04978 |
| 106 | C7 | DYY | 0.01528  | 0.09186  | 0.00000  | 0.00000  | 0.04103  |
| 107 | C7 | DZZ | 0.01912  | -0.06404 | 0.00000  | 0.00000  | 0.00785  |
| 108 | C7 | DXY | 0.02422  | -0.02579 | 0.00000  | 0.00000  | -0.01177 |
| 109 | C7 | DXZ | 0.00000  | 0.00000  | 0.01569  | -0.00171 | 0.00000  |
| 110 | C7 | DYZ | 0.00000  | 0.00000  | 0.00983  | -0.03151 | 0.00000  |
| 111 | H3 | S   | -0.09476 | 0.19325  | 0.00000  | 0.00000  | -0.05742 |
| 112 | H3 | S   | 0.22203  | -0.07424 | 0.00000  | 0.00000  | 0.00563  |

|     |     |     |          |          |          |          |          |
|-----|-----|-----|----------|----------|----------|----------|----------|
| 113 | H3  | PX  | 0.00867  | -0.00491 | 0.00000  | 0.00000  | 0.00521  |
| 114 | H3  | PY  | -0.00722 | 0.01400  | 0.00000  | 0.00000  | -0.01027 |
| 115 | H3  | PZ  | 0.00000  | 0.00000  | 0.01013  | 0.00047  | 0.00000  |
| 116 | H4  | S   | 0.13370  | -0.00784 | 0.00000  | 0.00000  | -0.18100 |
| 117 | H4  | S   | -0.02701 | 0.09486  | 0.00000  | 0.00000  | 0.50607  |
| 118 | H4  | PX  | 0.01020  | -0.00592 | 0.00000  | 0.00000  | 0.01753  |
| 119 | H4  | PY  | 0.00835  | 0.00330  | 0.00000  | 0.00000  | -0.02376 |
| 120 | H4  | PZ  | 0.00000  | 0.00000  | 0.00089  | -0.00639 | 0.00000  |
| 121 | N1  | S   | -0.00097 | -0.00443 | 0.00000  | 0.00000  | -0.02681 |
| 122 | N1  | S   | -0.04128 | 0.01058  | 0.00000  | 0.00000  | 0.04286  |
| 123 | N1  | PX  | 0.22851  | 0.08362  | 0.00000  | 0.00000  | 0.66019  |
| 124 | N1  | PY  | 0.01241  | 0.04346  | 0.00000  | 0.00000  | 0.21896  |
| 125 | N1  | PZ  | 0.00000  | 0.00000  | -0.05079 | 0.12473  | 0.00000  |
| 126 | N1  | S   | 0.34193  | 0.10500  | 0.00000  | 0.00000  | -1.12902 |
| 127 | N1  | PX  | 0.21058  | -0.11400 | 0.00000  | 0.00000  | -0.91734 |
| 128 | N1  | PY  | -0.42210 | 0.26459  | 0.00000  | 0.00000  | 0.10142  |
| 129 | N1  | PZ  | 0.00000  | 0.00000  | 0.09342  | 0.03610  | 0.00000  |
| 130 | N1  | DXX | -0.01695 | 0.01643  | 0.00000  | 0.00000  | -0.09168 |
| 131 | N1  | DYY | -0.00195 | -0.00648 | 0.00000  | 0.00000  | -0.18552 |
| 132 | N1  | DZZ | -0.02445 | -0.02003 | 0.00000  | 0.00000  | 0.05889  |
| 133 | N1  | DXY | -0.01086 | -0.01825 | 0.00000  | 0.00000  | 0.00280  |
| 134 | N1  | DXZ | 0.00000  | 0.00000  | -0.01540 | 0.03098  | 0.00000  |
| 135 | N1  | DYZ | 0.00000  | 0.00000  | 0.01779  | -0.03103 | 0.00000  |
| 136 | H6  | S   | -0.35328 | 0.03459  | 0.00000  | 0.00000  | 0.02741  |
| 137 | H6  | S   | 0.20375  | -0.12044 | 0.00000  | 0.00000  | -0.27696 |
| 138 | H6  | PX  | 0.02639  | -0.00343 | 0.00000  | 0.00000  | -0.00210 |
| 139 | H6  | PY  | 0.00272  | 0.00770  | 0.00000  | 0.00000  | 0.00221  |
| 140 | H6  | PZ  | 0.00000  | 0.00000  | 0.00707  | -0.00849 | 0.00000  |
| 141 | C8  | S   | 0.01811  | 0.02930  | 0.00000  | 0.00000  | 0.00747  |
| 142 | C8  | S   | -0.14889 | 0.12998  | 0.00000  | 0.00000  | -0.25959 |
| 143 | C8  | PX  | -0.01884 | 0.11789  | 0.00000  | 0.00000  | 0.26527  |
| 144 | C8  | PY  | 0.14152  | 0.39160  | 0.00000  | 0.00000  | -0.39673 |
| 145 | C8  | PZ  | 0.00000  | 0.00000  | 0.01280  | 0.75053  | 0.00000  |
| 146 | C8  | S   | 0.29980  | -0.28144 | 0.00000  | 0.00000  | 1.07337  |
| 147 | C8  | PX  | 0.87934  | -0.31771 | 0.00000  | 0.00000  | -0.86084 |
| 148 | C8  | PY  | -0.10697 | -0.37678 | 0.00000  | 0.00000  | 1.10883  |
| 149 | C8  | PZ  | 0.00000  | 0.00000  | -0.14284 | -1.30499 | 0.00000  |
| 150 | C8  | DXX | 0.03114  | 0.02333  | 0.00000  | 0.00000  | 0.03093  |
| 151 | C8  | DYY | 0.00887  | 0.08287  | 0.00000  | 0.00000  | -0.00947 |
| 152 | C8  | DZZ | -0.02792 | -0.02111 | 0.00000  | 0.00000  | -0.02704 |
| 153 | C8  | DXY | 0.00873  | 0.00676  | 0.00000  | 0.00000  | -0.09493 |
| 154 | C8  | DXZ | 0.00000  | 0.00000  | -0.00081 | -0.00825 | 0.00000  |
| 155 | C8  | DYZ | 0.00000  | 0.00000  | -0.04355 | 0.04624  | 0.00000  |
| 156 | H8  | S   | -0.13030 | 0.19321  | 0.00000  | 0.00000  | -0.03565 |
| 157 | H8  | S   | -0.07093 | -0.37859 | 0.00000  | 0.00000  | -0.28333 |
| 158 | H8  | PX  | 0.00216  | 0.02285  | 0.00000  | 0.00000  | 0.00664  |
| 159 | H8  | PY  | 0.00321  | -0.02446 | 0.00000  | 0.00000  | -0.01140 |
| 160 | H8  | PZ  | 0.00000  | 0.00000  | 0.00994  | 0.00877  | 0.00000  |
| 161 | C10 | S   | -0.03410 | -0.04966 | 0.00000  | 0.00000  | 0.02875  |
| 162 | C10 | S   | -0.32541 | -0.23891 | 0.00000  | 0.00000  | 0.19323  |
| 163 | C10 | PX  | 0.09463  | 0.03345  | 0.00000  | 0.00000  | -0.01351 |
| 164 | C10 | PY  | 0.01622  | 0.18530  | 0.00000  | 0.00000  | -0.11536 |
| 165 | C10 | PZ  | 0.00000  | 0.00000  | 0.14498  | -0.28426 | 0.00000  |
| 166 | C10 | S   | 0.74055  | 0.66318  | 0.00000  | 0.00000  | -0.13044 |

|     |     |     |          |          |          |         |          |
|-----|-----|-----|----------|----------|----------|---------|----------|
| 167 | C10 | PX  | -0.51956 | -0.05211 | 0.00000  | 0.00000 | 0.13273  |
| 168 | C10 | PY  | -0.04689 | -0.20170 | 0.00000  | 0.00000 | 0.08102  |
| 169 | C10 | PZ  | 0.00000  | 0.00000  | -0.16222 | 0.68871 | 0.00000  |
| 170 | C10 | DXX | -0.07177 | -0.06723 | 0.00000  | 0.00000 | 0.02556  |
| 171 | C10 | DYY | -0.07487 | -0.11138 | 0.00000  | 0.00000 | 0.07436  |
| 172 | C10 | DZZ | 0.02591  | 0.04635  | 0.00000  | 0.00000 | -0.02854 |
| 173 | C10 | DXY | -0.00591 | -0.01468 | 0.00000  | 0.00000 | 0.00824  |
| 174 | C10 | DXZ | 0.00000  | 0.00000  | 0.01515  | 0.00298 | 0.00000  |
| 175 | C10 | DYZ | 0.00000  | 0.00000  | 0.01647  | 0.00050 | 0.00000  |
| 176 | H16 | S   | -0.18744 | -0.18747 | 0.00000  | 0.00000 | 0.13453  |
| 177 | H16 | S   | 0.13517  | -0.08214 | 0.00000  | 0.00000 | 0.01928  |
| 178 | H16 | PX  | -0.01526 | -0.00799 | 0.00000  | 0.00000 | -0.00931 |
| 179 | H16 | PY  | 0.01347  | 0.00554  | 0.00000  | 0.00000 | -0.02469 |
| 180 | H16 | PZ  | 0.00000  | 0.00000  | 0.00164  | 0.00890 | 0.00000  |
| 181 | H18 | S   | -0.22753 | -0.28233 | 0.00000  | 0.00000 | 0.05411  |
| 182 | H18 | S   | -0.30220 | -0.08322 | 0.00000  | 0.00000 | 0.02499  |
| 183 | H18 | PX  | 0.00450  | 0.00525  | 0.00000  | 0.00000 | 0.00110  |
| 184 | H18 | PY  | 0.00309  | 0.01662  | 0.00000  | 0.00000 | 0.00837  |
| 185 | H18 | PZ  | 0.00000  | 0.00000  | -0.00564 | 0.00552 | 0.00000  |

|              |          |          |          |          |          |
|--------------|----------|----------|----------|----------|----------|
| MO:          | 76       | 77       | 78       | 79       | 80       |
| Eigenvalues: | 1.04060  | 1.04963  | 1.05374  | 1.07556  | 1.08597  |
| (ev):        | 28.31629 | 28.56182 | 28.67377 | 29.26760 | 29.55087 |

|    |    |     |          |          |          |          |          |
|----|----|-----|----------|----------|----------|----------|----------|
|    |    | A   | A        | A        | A        | A        |          |
| 1  | H1 | S   | 0.00000  | -0.00292 | 0.15600  | -0.30413 | 0.13931  |
| 2  | H1 | S   | 0.00000  | -0.41857 | -0.87875 | 1.12984  | -1.35907 |
| 3  | H1 | PX  | 0.00000  | 0.01999  | 0.05019  | -0.07865 | 0.07335  |
| 4  | H1 | PY  | 0.00000  | 0.00757  | 0.01953  | -0.01905 | 0.00279  |
| 5  | H1 | PZ  | -0.02346 | 0.00000  | 0.00000  | 0.00000  | 0.00000  |
| 6  | C1 | S   | 0.00000  | 0.00543  | 0.01659  | -0.01993 | 0.01890  |
| 7  | C1 | S   | 0.00000  | 0.04194  | -0.15595 | 0.25187  | -0.12598 |
| 8  | C1 | PX  | 0.00000  | -0.17775 | -0.27197 | 0.41358  | -0.49004 |
| 9  | C1 | PY  | 0.00000  | 0.00103  | 0.07902  | 0.03971  | -0.03986 |
| 10 | C1 | PZ  | 0.22148  | 0.00000  | 0.00000  | 0.00000  | 0.00000  |
| 11 | C1 | S   | 0.00000  | -0.05828 | 0.39462  | -0.59413 | -0.13261 |
| 12 | C1 | PX  | 0.00000  | 0.64702  | 1.03340  | -1.02902 | 2.12878  |
| 13 | C1 | PY  | 0.00000  | 0.16296  | 0.00997  | -0.05122 | 0.29149  |
| 14 | C1 | PZ  | -0.86851 | 0.00000  | 0.00000  | 0.00000  | 0.00000  |
| 15 | C1 | DXX | 0.00000  | 0.02417  | 0.05959  | -0.13673 | 0.02891  |
| 16 | C1 | DYY | 0.00000  | -0.00668 | -0.03426 | 0.08672  | -0.02578 |
| 17 | C1 | DZZ | 0.00000  | -0.00968 | -0.04410 | 0.05072  | -0.02431 |
| 18 | C1 | DXY | 0.00000  | -0.01236 | 0.05243  | 0.03485  | 0.02720  |
| 19 | C1 | DXZ | -0.01280 | 0.00000  | 0.00000  | 0.00000  | 0.00000  |
| 20 | C1 | DYZ | -0.00761 | 0.00000  | 0.00000  | 0.00000  | 0.00000  |
| 21 | C2 | S   | 0.00000  | 0.00363  | -0.00079 | 0.01019  | 0.02132  |
| 22 | C2 | S   | 0.00000  | -0.21087 | 0.13334  | -0.18399 | -0.27640 |
| 23 | C2 | PX  | 0.00000  | 0.08826  | -0.09186 | 0.14129  | 0.42885  |
| 24 | C2 | PY  | 0.00000  | 0.01332  | -0.08303 | 0.05888  | 0.10374  |
| 25 | C2 | PZ  | -0.36201 | 0.00000  | 0.00000  | 0.00000  | 0.00000  |
| 26 | C2 | S   | 0.00000  | -0.32410 | 0.00976  | 0.59425  | -0.02360 |
| 27 | C2 | PX  | 0.00000  | -0.55732 | 0.48233  | -0.10193 | -1.61724 |
| 28 | C2 | PY  | 0.00000  | -0.05588 | -0.05342 | -0.26611 | -0.62472 |
| 29 | C2 | PZ  | 1.06059  | 0.00000  | 0.00000  | 0.00000  | 0.00000  |

|    |    |     |          |          |          |          |          |
|----|----|-----|----------|----------|----------|----------|----------|
| 30 | C2 | DXX | 0.00000  | -0.01994 | -0.00147 | 0.07489  | 0.09449  |
| 31 | C2 | DYY | 0.00000  | -0.02400 | 0.01734  | -0.04759 | -0.08746 |
| 32 | C2 | DZZ | 0.00000  | 0.00891  | 0.00637  | -0.02981 | -0.04093 |
| 33 | C2 | DXY | 0.00000  | 0.00884  | 0.00754  | 0.04927  | -0.00718 |
| 34 | C2 | DXZ | -0.01199 | 0.00000  | 0.00000  | 0.00000  | 0.00000  |
| 35 | C2 | DYZ | 0.02713  | 0.00000  | 0.00000  | 0.00000  | 0.00000  |
| 36 | C3 | S   | 0.00000  | 0.00338  | 0.01577  | 0.01986  | 0.00218  |
| 37 | C3 | S   | 0.00000  | 0.11493  | 0.15901  | 0.17243  | -0.09792 |
| 38 | C3 | PX  | 0.00000  | 0.02665  | 0.06770  | -0.14665 | 0.18548  |
| 39 | C3 | PY  | 0.00000  | -0.12569 | 0.12425  | 0.19534  | -0.03448 |
| 40 | C3 | PZ  | -0.67347 | 0.00000  | 0.00000  | 0.00000  | 0.00000  |
| 41 | C3 | S   | 0.00000  | 0.08420  | 1.05724  | -0.48209 | 1.01177  |
| 42 | C3 | PX  | 0.00000  | -0.38081 | -0.46521 | 0.96597  | -0.57250 |
| 43 | C3 | PY  | 0.00000  | 0.71516  | -0.58062 | -1.16437 | 0.26419  |
| 44 | C3 | PZ  | 1.66304  | 0.00000  | 0.00000  | 0.00000  | 0.00000  |
| 45 | C3 | DXX | 0.00000  | 0.01881  | -0.01210 | -0.00823 | -0.03483 |
| 46 | C3 | DYY | 0.00000  | 0.00919  | 0.11848  | 0.03341  | 0.05837  |
| 47 | C3 | DZZ | 0.00000  | 0.00272  | -0.03184 | 0.00029  | -0.01050 |
| 48 | C3 | DXY | 0.00000  | 0.03562  | -0.00803 | -0.01703 | 0.03391  |
| 49 | C3 | DXZ | -0.00579 | 0.00000  | 0.00000  | 0.00000  | 0.00000  |
| 50 | C3 | DYZ | 0.00238  | 0.00000  | 0.00000  | 0.00000  | 0.00000  |
| 51 | C4 | S   | 0.00000  | 0.00659  | -0.00381 | -0.03161 | -0.01620 |
| 52 | C4 | S   | 0.00000  | 0.08223  | -0.05131 | 0.24131  | 0.13485  |
| 53 | C4 | PX  | 0.00000  | -0.11422 | -0.00500 | 0.24575  | 0.21497  |
| 54 | C4 | PY  | 0.00000  | -0.08485 | 0.15762  | 0.47874  | 0.33304  |
| 55 | C4 | PZ  | -0.20681 | 0.00000  | 0.00000  | 0.00000  | 0.00000  |
| 56 | C4 | S   | 0.00000  | -0.18554 | 0.45395  | 0.00572  | 0.51882  |
| 57 | C4 | PX  | 0.00000  | 0.20723  | -0.38304 | -1.16762 | -1.11907 |
| 58 | C4 | PY  | 0.00000  | 0.36863  | -0.59825 | -1.58387 | -1.35344 |
| 59 | C4 | PZ  | 0.67088  | 0.00000  | 0.00000  | 0.00000  | 0.00000  |
| 60 | C4 | DXX | 0.00000  | -0.01775 | -0.00803 | 0.08179  | 0.00269  |
| 61 | C4 | DYY | 0.00000  | 0.03849  | 0.01386  | -0.12242 | -0.00868 |
| 62 | C4 | DZZ | 0.00000  | -0.00358 | -0.00701 | 0.05256  | 0.01997  |
| 63 | C4 | DXY | 0.00000  | -0.00626 | -0.02245 | -0.07318 | -0.08021 |
| 64 | C4 | DXZ | -0.00732 | 0.00000  | 0.00000  | 0.00000  | 0.00000  |
| 65 | C4 | DYZ | -0.01247 | 0.00000  | 0.00000  | 0.00000  | 0.00000  |
| 66 | C5 | S   | 0.00000  | -0.00609 | -0.00493 | 0.03089  | -0.00226 |
| 67 | C5 | S   | 0.00000  | 0.02494  | -0.00585 | -0.12044 | -0.04054 |
| 68 | C5 | PX  | 0.00000  | -0.15534 | -0.06666 | 0.28921  | 0.00443  |
| 69 | C5 | PY  | 0.00000  | 0.03821  | 0.03329  | -0.43447 | 0.03574  |
| 70 | C5 | PZ  | 0.28920  | 0.00000  | 0.00000  | 0.00000  | 0.00000  |
| 71 | C5 | S   | 0.00000  | 0.35622  | -0.40394 | -0.26468 | 0.24348  |
| 72 | C5 | PX  | 0.00000  | 0.36488  | -0.16407 | -1.44039 | -0.52317 |
| 73 | C5 | PY  | 0.00000  | -0.51410 | 0.00240  | 1.56288  | -0.41099 |
| 74 | C5 | PZ  | -0.81008 | 0.00000  | 0.00000  | 0.00000  | 0.00000  |
| 75 | C5 | DXX | 0.00000  | 0.01898  | -0.01374 | -0.03520 | -0.04995 |
| 76 | C5 | DYY | 0.00000  | -0.01167 | -0.02147 | 0.07843  | 0.04517  |
| 77 | C5 | DZZ | 0.00000  | 0.00641  | 0.00797  | -0.04114 | -0.00109 |
| 78 | C5 | DXY | 0.00000  | 0.01851  | 0.01052  | -0.06472 | 0.04273  |
| 79 | C5 | DXZ | 0.00040  | 0.00000  | 0.00000  | 0.00000  | 0.00000  |
| 80 | C5 | DYZ | -0.00108 | 0.00000  | 0.00000  | 0.00000  | 0.00000  |
| 81 | C6 | S   | 0.00000  | -0.00158 | -0.01207 | -0.01499 | -0.00987 |
| 82 | C6 | S   | 0.00000  | -0.46520 | 0.19854  | -0.29100 | 0.01396  |
| 83 | C6 | PX  | 0.00000  | 0.21487  | -0.13046 | -0.04744 | -0.02449 |



|     |    |     |          |          |          |          |          |
|-----|----|-----|----------|----------|----------|----------|----------|
| 84  | C6 | PY  | 0.00000  | 0.26060  | -0.24335 | -0.04298 | -0.04573 |
| 85  | C6 | PZ  | 0.60710  | 0.00000  | 0.00000  | 0.00000  | 0.00000  |
| 86  | C6 | S   | 0.00000  | -0.37785 | -0.04720 | 0.78329  | -0.53699 |
| 87  | C6 | PX  | 0.00000  | -0.50055 | 0.17336  | 0.70101  | 0.30592  |
| 88  | C6 | PY  | 0.00000  | 0.53555  | -0.43840 | 0.56820  | 0.77449  |
| 89  | C6 | PZ  | -1.50926 | 0.00000  | 0.00000  | 0.00000  | 0.00000  |
| 90  | C6 | DXX | 0.00000  | -0.04827 | 0.00183  | -0.00045 | -0.05102 |
| 91  | C6 | DYY | 0.00000  | -0.09797 | 0.02840  | -0.03807 | 0.02269  |
| 92  | C6 | DZZ | 0.00000  | 0.01257  | 0.00551  | -0.00600 | 0.01207  |
| 93  | C6 | DXY | 0.00000  | 0.02404  | -0.01848 | 0.03192  | -0.00866 |
| 94  | C6 | DXZ | 0.00988  | 0.00000  | 0.00000  | 0.00000  | 0.00000  |
| 95  | C6 | DYZ | -0.04068 | 0.00000  | 0.00000  | 0.00000  | 0.00000  |
| 96  | C7 | S   | 0.00000  | 0.01705  | 0.03073  | -0.00116 | 0.00434  |
| 97  | C7 | S   | 0.00000  | -0.04724 | -0.17405 | 0.23066  | -0.22457 |
| 98  | C7 | PX  | 0.00000  | -0.26351 | -0.69643 | -0.05664 | -0.21872 |
| 99  | C7 | PY  | 0.00000  | -0.13748 | 0.23162  | 0.15994  | 0.02934  |
| 100 | C7 | PZ  | 0.17540  | 0.00000  | 0.00000  | 0.00000  | 0.00000  |
| 101 | C7 | S   | 0.00000  | 1.01338  | -0.27457 | -0.87469 | -0.33183 |
| 102 | C7 | PX  | 0.00000  | 0.37399  | 2.99524  | 0.17570  | 1.12445  |
| 103 | C7 | PY  | 0.00000  | 0.31218  | -1.07381 | -0.82528 | -0.01212 |
| 104 | C7 | PZ  | -0.76773 | 0.00000  | 0.00000  | 0.00000  | 0.00000  |
| 105 | C7 | DXX | 0.00000  | 0.02933  | 0.06232  | 0.03632  | -0.00665 |
| 106 | C7 | DYY | 0.00000  | 0.03443  | -0.04882 | -0.02131 | -0.04802 |
| 107 | C7 | DZZ | 0.00000  | -0.02477 | -0.05588 | 0.01289  | -0.00492 |
| 108 | C7 | DXY | 0.00000  | -0.02746 | -0.01497 | 0.01574  | -0.06104 |
| 109 | C7 | DXZ | 0.01379  | 0.00000  | 0.00000  | 0.00000  | 0.00000  |
| 110 | C7 | DYZ | -0.01014 | 0.00000  | 0.00000  | 0.00000  | 0.00000  |
| 111 | H3 | S   | 0.00000  | -0.00050 | -0.02529 | -0.34993 | -0.21613 |
| 112 | H3 | S   | 0.00000  | -0.25523 | 0.35238  | 1.60489  | 1.15311  |
| 113 | H3 | PX  | 0.00000  | 0.00155  | -0.00906 | -0.05828 | -0.02771 |
| 114 | H3 | PY  | 0.00000  | 0.01406  | -0.01411 | -0.08045 | -0.06042 |
| 115 | H3 | PZ  | 0.00835  | 0.00000  | 0.00000  | 0.00000  | 0.00000  |
| 116 | H4 | S   | 0.00000  | -0.06388 | -0.01063 | 0.28597  | -0.03449 |
| 117 | H4 | S   | 0.00000  | 0.37141  | 0.06907  | -1.50467 | 0.04550  |
| 118 | H4 | PX  | 0.00000  | 0.00248  | 0.00109  | -0.05996 | -0.00658 |
| 119 | H4 | PY  | 0.00000  | -0.02094 | -0.01023 | 0.06721  | -0.01084 |
| 120 | H4 | PZ  | -0.01437 | 0.00000  | 0.00000  | 0.00000  | 0.00000  |
| 121 | N1 | S   | 0.00000  | -0.05899 | 0.02618  | -0.00756 | 0.00128  |
| 122 | N1 | S   | 0.00000  | 0.19496  | -0.03495 | -0.01027 | -0.09316 |
| 123 | N1 | PX  | 0.00000  | -0.33052 | 0.04979  | 0.01787  | -0.02739 |
| 124 | N1 | PY  | 0.00000  | -0.09679 | -0.01945 | -0.07736 | 0.01329  |
| 125 | N1 | PZ  | 0.15618  | 0.00000  | 0.00000  | 0.00000  | 0.00000  |
| 126 | N1 | S   | 0.00000  | 0.04733  | -1.15100 | -0.09080 | 0.96336  |
| 127 | N1 | PX  | 0.00000  | 1.10857  | -0.65455 | -0.06290 | 0.07650  |
| 128 | N1 | PY  | 0.00000  | 0.86752  | -0.31978 | 0.35801  | 0.06942  |
| 129 | N1 | PZ  | -0.02934 | 0.00000  | 0.00000  | 0.00000  | 0.00000  |
| 130 | N1 | DXX | 0.00000  | -0.06451 | -0.01592 | -0.04778 | -0.01471 |
| 131 | N1 | DYY | 0.00000  | 0.01589  | 0.01844  | -0.00534 | 0.03521  |
| 132 | N1 | DZZ | 0.00000  | 0.14205  | -0.02863 | 0.03045  | -0.03703 |
| 133 | N1 | DXY | 0.00000  | 0.00885  | 0.03511  | 0.01310  | -0.01560 |
| 134 | N1 | DXZ | 0.02978  | 0.00000  | 0.00000  | 0.00000  | 0.00000  |
| 135 | N1 | DYZ | 0.02788  | 0.00000  | 0.00000  | 0.00000  | 0.00000  |
| 136 | H6 | S   | 0.00000  | -0.01992 | 0.04772  | 0.13148  | 0.25655  |
| 137 | H6 | S   | 0.00000  | -0.26884 | 0.29450  | -0.39754 | -1.33941 |

|     |     |     |          |          |          |          |          |
|-----|-----|-----|----------|----------|----------|----------|----------|
| 138 | H6  | PX  | 0.00000  | -0.01315 | 0.01173  | -0.03384 | -0.07898 |
| 139 | H6  | PY  | 0.00000  | -0.02703 | 0.00139  | 0.00221  | -0.00365 |
| 140 | H6  | PZ  | 0.02368  | 0.00000  | 0.00000  | 0.00000  | 0.00000  |
| 141 | C8  | S   | 0.00000  | -0.01605 | 0.00991  | 0.00287  | -0.00979 |
| 142 | C8  | S   | 0.00000  | -0.62849 | 0.18592  | -0.09794 | -0.08721 |
| 143 | C8  | PX  | 0.00000  | 0.36073  | -0.01674 | 0.16841  | -0.21767 |
| 144 | C8  | PY  | 0.00000  | -0.22155 | -0.06427 | -0.08656 | -0.11087 |
| 145 | C8  | PZ  | -0.33331 | 0.00000  | 0.00000  | 0.00000  | 0.00000  |
| 146 | C8  | S   | 0.00000  | 1.03465  | 0.70384  | 0.29666  | 0.34647  |
| 147 | C8  | PX  | 0.00000  | -1.01452 | -0.44399 | -0.83294 | 1.32921  |
| 148 | C8  | PY  | 0.00000  | -0.23962 | 1.79620  | 0.25406  | 0.77057  |
| 149 | C8  | PZ  | 0.73537  | 0.00000  | 0.00000  | 0.00000  | 0.00000  |
| 150 | C8  | DXX | 0.00000  | -0.01407 | 0.05448  | 0.00692  | -0.01785 |
| 151 | C8  | DYY | 0.00000  | -0.13345 | 0.06652  | -0.01231 | -0.00584 |
| 152 | C8  | DZZ | 0.00000  | 0.00677  | -0.03101 | -0.00619 | 0.00314  |
| 153 | C8  | DXY | 0.00000  | 0.04833  | 0.07996  | 0.00806  | -0.02037 |
| 154 | C8  | DXZ | -0.01745 | 0.00000  | 0.00000  | 0.00000  | 0.00000  |
| 155 | C8  | DYZ | 0.00666  | 0.00000  | 0.00000  | 0.00000  | 0.00000  |
| 156 | H8  | S   | 0.00000  | 0.14922  | 0.10201  | 0.01647  | 0.12393  |
| 157 | H8  | S   | 0.00000  | -0.38804 | -2.04629 | -0.15472 | -0.73552 |
| 158 | H8  | PX  | 0.00000  | 0.03901  | 0.09678  | 0.00880  | 0.03029  |
| 159 | H8  | PY  | 0.00000  | -0.00882 | -0.02662 | 0.01268  | -0.02855 |
| 160 | H8  | PZ  | -0.01768 | 0.00000  | 0.00000  | 0.00000  | 0.00000  |
| 161 | C10 | S   | 0.00000  | 0.01261  | 0.00604  | 0.00592  | 0.00442  |
| 162 | C10 | S   | 0.00000  | -0.33528 | -0.02067 | -0.00126 | -0.09432 |
| 163 | C10 | PX  | 0.00000  | -0.14997 | -0.56117 | -0.17838 | 0.61225  |
| 164 | C10 | PY  | 0.00000  | -0.04869 | 0.09502  | 0.01281  | -0.07303 |
| 165 | C10 | PZ  | 0.01851  | 0.00000  | 0.00000  | 0.00000  | 0.00000  |
| 166 | C10 | S   | 0.00000  | -0.10202 | 1.16414  | 0.02233  | 0.62218  |
| 167 | C10 | PX  | 0.00000  | 0.64467  | 1.67132  | 0.70579  | -1.92821 |
| 168 | C10 | PY  | 0.00000  | -0.02942 | 0.10134  | -0.08733 | 0.37926  |
| 169 | C10 | PZ  | -0.21116 | 0.00000  | 0.00000  | 0.00000  | 0.00000  |
| 170 | C10 | DXX | 0.00000  | 0.00524  | 0.00146  | 0.00558  | 0.00590  |
| 171 | C10 | DYY | 0.00000  | -0.01758 | 0.02641  | 0.00979  | 0.00635  |
| 172 | C10 | DZZ | 0.00000  | -0.01209 | -0.03074 | -0.00737 | -0.01408 |
| 173 | C10 | DXY | 0.00000  | -0.04492 | -0.07147 | -0.01219 | 0.09604  |
| 174 | C10 | DXZ | -0.01628 | 0.00000  | 0.00000  | 0.00000  | 0.00000  |
| 175 | C10 | DYZ | -0.00334 | 0.00000  | 0.00000  | 0.00000  | 0.00000  |
| 176 | H16 | S   | 0.00000  | 0.26803  | 0.08931  | 0.05859  | -0.15123 |
| 177 | H16 | S   | 0.00000  | -0.49691 | -1.08310 | -0.41878 | 1.15281  |
| 178 | H16 | PX  | 0.00000  | 0.02865  | 0.05419  | 0.01728  | -0.05284 |
| 179 | H16 | PY  | 0.00000  | -0.02415 | -0.04465 | -0.01403 | 0.04434  |
| 180 | H16 | PZ  | -0.00891 | 0.00000  | 0.00000  | 0.00000  | 0.00000  |
| 181 | H18 | S   | 0.00000  | 0.00147  | -0.07430 | -0.00213 | 0.17075  |
| 182 | H18 | S   | 0.00000  | 0.37281  | 0.85007  | 0.34030  | -1.16968 |
| 183 | H18 | PX  | 0.00000  | -0.00871 | 0.05060  | 0.01294  | -0.06077 |
| 184 | H18 | PY  | 0.00000  | 0.02763  | 0.01497  | 0.01047  | -0.05048 |
| 185 | H18 | PZ  | 0.00048  | 0.00000  | 0.00000  | 0.00000  | 0.00000  |

|              |          |          |          |          |          |
|--------------|----------|----------|----------|----------|----------|
| MO:          | 81       | 82       | 83       | 84       | 85       |
| Eigenvalues: | 1.10437  | 1.12072  | 1.12717  | 1.13890  | 1.16081  |
| (ev):        | 30.05141 | 30.49639 | 30.67181 | 30.99115 | 31.58731 |

A

A

A

A

A

|    |    |     |          |          |          |          |          |
|----|----|-----|----------|----------|----------|----------|----------|
| 1  | H1 | S   | 0.17054  | -0.06642 | 0.00000  | -0.26320 | 0.05922  |
| 2  | H1 | S   | -0.74859 | -0.20358 | 0.00000  | 1.56623  | -0.39589 |
| 3  | H1 | PX  | 0.04873  | 0.01274  | 0.00000  | -0.10272 | 0.00736  |
| 4  | H1 | PY  | -0.01804 | -0.02592 | 0.00000  | 0.00110  | 0.01658  |
| 5  | H1 | PZ  | 0.00000  | 0.00000  | 0.00361  | 0.00000  | 0.00000  |
| 6  | C1 | S   | 0.01103  | -0.00156 | 0.00000  | 0.00048  | 0.00237  |
| 7  | C1 | S   | -0.22353 | -0.24102 | 0.00000  | 0.76989  | 0.09874  |
| 8  | C1 | PX  | -0.24835 | -0.04153 | 0.00000  | 0.52089  | -0.07924 |
| 9  | C1 | PY  | -0.02225 | 0.06288  | 0.00000  | 0.03885  | -0.00664 |
| 10 | C1 | PZ  | 0.00000  | 0.00000  | -0.05861 | 0.00000  | 0.00000  |
| 11 | C1 | S   | -0.27150 | 0.54082  | 0.00000  | -1.66412 | -0.59511 |
| 12 | C1 | PX  | 0.95466  | 0.35591  | 0.00000  | -1.66545 | 0.64059  |
| 13 | C1 | PY  | -0.09910 | -0.26463 | 0.00000  | 0.22595  | 0.29425  |
| 14 | C1 | PZ  | 0.00000  | 0.00000  | 0.23216  | 0.00000  | 0.00000  |
| 15 | C1 | DXX | 0.04140  | -0.04731 | 0.00000  | -0.03676 | 0.02138  |
| 16 | C1 | DYY | -0.06643 | -0.01103 | 0.00000  | 0.08879  | -0.00015 |
| 17 | C1 | DZZ | -0.00940 | 0.00429  | 0.00000  | 0.05198  | -0.01072 |
| 18 | C1 | DXY | -0.00658 | 0.01855  | 0.00000  | -0.02110 | 0.03078  |
| 19 | C1 | DXZ | 0.00000  | 0.00000  | -0.01507 | 0.00000  | 0.00000  |
| 20 | C1 | DYZ | 0.00000  | 0.00000  | 0.01475  | 0.00000  | 0.00000  |
| 21 | C2 | S   | 0.01744  | -0.00974 | 0.00000  | -0.00053 | 0.01863  |
| 22 | C2 | S   | -0.19955 | 0.37680  | 0.00000  | -0.50007 | 0.28768  |
| 23 | C2 | PX  | 0.61669  | -0.41299 | 0.00000  | 0.29509  | -0.11117 |
| 24 | C2 | PY  | 0.03052  | -0.09357 | 0.00000  | -0.08586 | -0.35667 |
| 25 | C2 | PZ  | 0.00000  | 0.00000  | -0.07457 | 0.00000  | 0.00000  |
| 26 | C2 | S   | -0.24573 | -0.80353 | 0.00000  | 1.44286  | -0.40700 |
| 27 | C2 | PX  | -2.62724 | 1.28102  | 0.00000  | -1.01842 | 0.54528  |
| 28 | C2 | PY  | 0.26037  | 0.30025  | 0.00000  | -0.36456 | 2.15583  |
| 29 | C2 | PZ  | 0.00000  | 0.00000  | -0.11507 | 0.00000  | 0.00000  |
| 30 | C2 | DXX | 0.04660  | -0.09229 | 0.00000  | -0.00239 | 0.04515  |
| 31 | C2 | DYY | -0.05839 | 0.07137  | 0.00000  | -0.03967 | 0.02490  |
| 32 | C2 | DZZ | -0.02718 | 0.05375  | 0.00000  | -0.03092 | -0.00417 |
| 33 | C2 | DXY | 0.00263  | 0.01523  | 0.00000  | -0.02829 | 0.05090  |
| 34 | C2 | DXZ | 0.00000  | 0.00000  | 0.02125  | 0.00000  | 0.00000  |
| 35 | C2 | DYZ | 0.00000  | 0.00000  | 0.02027  | 0.00000  | 0.00000  |
| 36 | C3 | S   | -0.01159 | 0.01287  | 0.00000  | -0.00169 | 0.00883  |
| 37 | C3 | S   | -0.13696 | -0.24890 | 0.00000  | 0.12116  | 0.49063  |
| 38 | C3 | PX  | -0.09697 | -0.04589 | 0.00000  | -0.08666 | 0.05638  |
| 39 | C3 | PY  | -0.05431 | 0.19556  | 0.00000  | -0.08325 | -0.21550 |
| 40 | C3 | PZ  | 0.00000  | 0.00000  | 0.17743  | 0.00000  | 0.00000  |
| 41 | C3 | S   | -0.85795 | 1.38983  | 0.00000  | -1.16502 | -0.68981 |
| 42 | C3 | PX  | 0.60926  | 0.09813  | 0.00000  | 0.84679  | -0.57817 |
| 43 | C3 | PY  | 0.80799  | -1.12068 | 0.00000  | 0.64242  | 1.16653  |
| 44 | C3 | PZ  | 0.00000  | 0.00000  | -0.50215 | 0.00000  | 0.00000  |
| 45 | C3 | DXX | -0.03794 | -0.00208 | 0.00000  | -0.01382 | 0.03525  |
| 46 | C3 | DYY | -0.03821 | 0.03121  | 0.00000  | -0.00701 | 0.01420  |
| 47 | C3 | DZZ | 0.01945  | -0.02614 | 0.00000  | 0.01010  | 0.00326  |
| 48 | C3 | DXY | -0.00990 | -0.07622 | 0.00000  | 0.03715  | 0.05070  |
| 49 | C3 | DXZ | 0.00000  | 0.00000  | -0.03186 | 0.00000  | 0.00000  |
| 50 | C3 | DYZ | 0.00000  | 0.00000  | 0.01463  | 0.00000  | 0.00000  |
| 51 | C4 | S   | -0.00956 | -0.01251 | 0.00000  | 0.00004  | 0.00111  |
| 52 | C4 | S   | 0.07598  | 0.40280  | 0.00000  | 0.21763  | 0.12736  |
| 53 | C4 | PX  | 0.12961  | 0.25064  | 0.00000  | -0.19605 | 0.03407  |
| 54 | C4 | PY  | 0.07370  | 0.40080  | 0.00000  | -0.02031 | 0.28412  |

|     |    |     |          |          |          |          |          |
|-----|----|-----|----------|----------|----------|----------|----------|
| 55  | C4 | PZ  | 0.00000  | 0.00000  | 0.05565  | 0.00000  | 0.00000  |
| 56  | C4 | S   | -0.25789 | -0.52527 | 0.00000  | -1.40315 | -0.67559 |
| 57  | C4 | PX  | 0.15831  | -0.73135 | 0.00000  | 0.92884  | -0.07601 |
| 58  | C4 | PY  | -0.43667 | -1.07665 | 0.00000  | 0.85378  | -0.83388 |
| 59  | C4 | PZ  | 0.00000  | 0.00000  | -0.14579 | 0.00000  | 0.00000  |
| 60  | C4 | DXX | -0.02195 | 0.06281  | 0.00000  | -0.01076 | -0.02057 |
| 61  | C4 | DYY | 0.00202  | -0.07214 | 0.00000  | -0.01269 | 0.01305  |
| 62  | C4 | DZZ | 0.02112  | 0.05569  | 0.00000  | 0.01629  | 0.01415  |
| 63  | C4 | DXY | -0.04709 | -0.09860 | 0.00000  | -0.04468 | -0.01680 |
| 64  | C4 | DXZ | 0.00000  | 0.00000  | -0.00406 | 0.00000  | 0.00000  |
| 65  | C4 | DYZ | 0.00000  | 0.00000  | -0.01977 | 0.00000  | 0.00000  |
| 66  | C5 | S   | -0.00416 | -0.01300 | 0.00000  | -0.01236 | -0.00470 |
| 67  | C5 | S   | 0.16433  | 0.61231  | 0.00000  | 0.21094  | 0.13825  |
| 68  | C5 | PX  | -0.13295 | -0.21572 | 0.00000  | -0.45296 | -0.24431 |
| 69  | C5 | PY  | 0.21547  | 0.31920  | 0.00000  | 0.41744  | -0.01744 |
| 70  | C5 | PZ  | 0.00000  | 0.00000  | 0.05784  | 0.00000  | 0.00000  |
| 71  | C5 | S   | 0.43439  | -1.96403 | 0.00000  | 0.25378  | -1.52653 |
| 72  | C5 | PX  | 0.98076  | 0.14931  | 0.00000  | 1.44675  | 1.12850  |
| 73  | C5 | PY  | -0.94135 | -0.38798 | 0.00000  | -1.51772 | 0.54397  |
| 74  | C5 | PZ  | 0.00000  | 0.00000  | -0.03199 | 0.00000  | 0.00000  |
| 75  | C5 | DXX | -0.02186 | 0.04033  | 0.00000  | 0.04771  | -0.00633 |
| 76  | C5 | DYY | 0.04931  | -0.07688 | 0.00000  | -0.06809 | -0.01810 |
| 77  | C5 | DZZ | 0.00758  | 0.07605  | 0.00000  | 0.04842  | 0.01176  |
| 78  | C5 | DXY | 0.05699  | 0.10955  | 0.00000  | 0.06139  | -0.04465 |
| 79  | C5 | DXZ | 0.00000  | 0.00000  | 0.01574  | 0.00000  | 0.00000  |
| 80  | C5 | DYZ | 0.00000  | 0.00000  | -0.02391 | 0.00000  | 0.00000  |
| 81  | C6 | S   | -0.00697 | 0.00329  | 0.00000  | 0.01269  | -0.00080 |
| 82  | C6 | S   | -0.10397 | -0.13040 | 0.00000  | -0.01895 | -0.41561 |
| 83  | C6 | PX  | -0.10133 | 0.13253  | 0.00000  | -0.20139 | 0.12261  |
| 84  | C6 | PY  | -0.15027 | -0.02744 | 0.00000  | -0.02467 | -0.04514 |
| 85  | C6 | PZ  | 0.00000  | 0.00000  | -0.31306 | 0.00000  | 0.00000  |
| 86  | C6 | S   | 1.30742  | 0.11707  | 0.00000  | 1.22989  | 2.34602  |
| 87  | C6 | PX  | 0.49481  | -0.77553 | 0.00000  | 1.08428  | -1.61357 |
| 88  | C6 | PY  | 1.18253  | -0.28445 | 0.00000  | -1.30990 | -0.51188 |
| 89  | C6 | PZ  | 0.00000  | 0.00000  | 0.96836  | 0.00000  | 0.00000  |
| 90  | C6 | DXX | -0.00501 | 0.00055  | 0.00000  | 0.01156  | -0.01197 |
| 91  | C6 | DYY | 0.01980  | -0.01976 | 0.00000  | 0.04950  | 0.00856  |
| 92  | C6 | DZZ | -0.00707 | -0.00085 | 0.00000  | -0.01783 | -0.02507 |
| 93  | C6 | DXY | -0.04410 | 0.03585  | 0.00000  | 0.03060  | -0.03464 |
| 94  | C6 | DXZ | 0.00000  | 0.00000  | 0.01148  | 0.00000  | 0.00000  |
| 95  | C6 | DYZ | 0.00000  | 0.00000  | -0.07510 | 0.00000  | 0.00000  |
| 96  | C7 | S   | -0.00777 | -0.00621 | 0.00000  | 0.01015  | 0.02339  |
| 97  | C7 | S   | 0.16953  | 0.20728  | 0.00000  | -0.21837 | 0.76796  |
| 98  | C7 | PX  | 0.52263  | 0.12899  | 0.00000  | -0.18729 | -0.02504 |
| 99  | C7 | PY  | -0.03350 | 0.26366  | 0.00000  | -0.01214 | -0.53624 |
| 100 | C7 | PZ  | 0.00000  | 0.00000  | 0.04454  | 0.00000  | 0.00000  |
| 101 | C7 | S   | 1.12712  | -0.91158 | 0.00000  | 0.64794  | -2.21606 |
| 102 | C7 | PX  | -2.45689 | -0.40255 | 0.00000  | 0.45995  | 0.86971  |
| 103 | C7 | PY  | 0.27356  | -1.12461 | 0.00000  | 0.26469  | 2.17836  |
| 104 | C7 | PZ  | 0.00000  | 0.00000  | -0.10557 | 0.00000  | 0.00000  |
| 105 | C7 | DXX | 0.00214  | 0.03500  | 0.00000  | 0.03295  | -0.03810 |
| 106 | C7 | DYY | 0.05993  | -0.04556 | 0.00000  | -0.02340 | 0.14226  |
| 107 | C7 | DZZ | -0.00084 | 0.02233  | 0.00000  | -0.03005 | 0.01067  |
| 108 | C7 | DXY | 0.06603  | 0.05030  | 0.00000  | -0.05488 | -0.04904 |

|     |     |     |          |          |          |          |          |
|-----|-----|-----|----------|----------|----------|----------|----------|
| 109 | C7  | DXZ | 0.00000  | 0.00000  | -0.03184 | 0.00000  | 0.00000  |
| 110 | C7  | DYZ | 0.00000  | 0.00000  | -0.03660 | 0.00000  | 0.00000  |
| 111 | H3  | S   | -0.09521 | -0.30212 | 0.00000  | -0.04840 | -0.04673 |
| 112 | H3  | S   | 0.34364  | 1.28929  | 0.00000  | -0.35559 | 0.57514  |
| 113 | H3  | PX  | 0.00035  | -0.02612 | 0.00000  | -0.01033 | -0.02775 |
| 114 | H3  | PY  | -0.02993 | -0.08537 | 0.00000  | 0.00767  | -0.03135 |
| 115 | H3  | PZ  | 0.00000  | 0.00000  | -0.00950 | 0.00000  | 0.00000  |
| 116 | H4  | S   | -0.12130 | -0.31945 | 0.00000  | -0.27894 | 0.06184  |
| 117 | H4  | S   | 0.78610  | 1.06050  | 0.00000  | 1.53118  | 0.17635  |
| 118 | H4  | PX  | 0.02252  | 0.03778  | 0.00000  | 0.02882  | -0.00348 |
| 119 | H4  | PY  | -0.03700 | -0.07828 | 0.00000  | -0.09209 | -0.02060 |
| 120 | H4  | PZ  | 0.00000  | 0.00000  | -0.00880 | 0.00000  | 0.00000  |
| 121 | N1  | S   | 0.00606  | -0.00277 | 0.00000  | 0.01710  | 0.00780  |
| 122 | N1  | S   | -0.02725 | 0.06148  | 0.00000  | 0.07680  | -0.13461 |
| 123 | N1  | PX  | 0.05354  | -0.21793 | 0.00000  | -0.03580 | 0.01674  |
| 124 | N1  | PY  | -0.12702 | 0.09998  | 0.00000  | 0.10893  | 0.05458  |
| 125 | N1  | PZ  | 0.00000  | 0.00000  | 0.94786  | 0.00000  | 0.00000  |
| 126 | N1  | S   | 0.27273  | -0.22168 | 0.00000  | -0.65558 | -0.69961 |
| 127 | N1  | PX  | -0.07039 | 0.49795  | 0.00000  | -0.25869 | -0.12042 |
| 128 | N1  | PY  | 0.32673  | -0.36452 | 0.00000  | -0.69708 | -0.92731 |
| 129 | N1  | PZ  | 0.00000  | 0.00000  | -1.51403 | 0.00000  | 0.00000  |
| 130 | N1  | DXX | 0.02060  | 0.03103  | 0.00000  | 0.02813  | -0.04825 |
| 131 | N1  | DYY | -0.00718 | -0.00603 | 0.00000  | 0.03648  | -0.06161 |
| 132 | N1  | DZZ | -0.01784 | 0.02609  | 0.00000  | -0.00904 | 0.02173  |
| 133 | N1  | DXY | 0.02780  | 0.00702  | 0.00000  | -0.03907 | -0.04660 |
| 134 | N1  | DXZ | 0.00000  | 0.00000  | 0.04814  | 0.00000  | 0.00000  |
| 135 | N1  | DYZ | 0.00000  | 0.00000  | 0.01921  | 0.00000  | 0.00000  |
| 136 | H6  | S   | 0.14534  | -0.23023 | 0.00000  | 0.17851  | 0.13615  |
| 137 | H6  | S   | -1.69128 | 1.23714  | 0.00000  | -0.95466 | 0.37991  |
| 138 | H6  | PX  | -0.08929 | 0.07584  | 0.00000  | -0.06576 | 0.01048  |
| 139 | H6  | PY  | -0.00209 | -0.02689 | 0.00000  | -0.01525 | 0.00183  |
| 140 | H6  | PZ  | 0.00000  | 0.00000  | -0.01159 | 0.00000  | 0.00000  |
| 141 | C8  | S   | 0.00664  | 0.00054  | 0.00000  | 0.00278  | -0.01994 |
| 142 | C8  | S   | 0.20223  | 0.17648  | 0.00000  | 0.14697  | -0.27329 |
| 143 | C8  | PX  | 0.24871  | 0.09104  | 0.00000  | -0.15870 | -0.46762 |
| 144 | C8  | PY  | 0.11548  | 0.06466  | 0.00000  | 0.06945  | -0.15561 |
| 145 | C8  | PZ  | 0.00000  | 0.00000  | -0.17311 | 0.00000  | 0.00000  |
| 146 | C8  | S   | -1.14689 | -0.82305 | 0.00000  | -0.13973 | 1.20743  |
| 147 | C8  | PX  | -1.51533 | -0.25296 | 0.00000  | 0.61968  | 2.24809  |
| 148 | C8  | PY  | -0.87249 | -0.61949 | 0.00000  | -0.21094 | 1.39999  |
| 149 | C8  | PZ  | 0.00000  | 0.00000  | 0.65172  | 0.00000  | 0.00000  |
| 150 | C8  | DXX | 0.00693  | -0.04576 | 0.00000  | 0.00092  | 0.06237  |
| 151 | C8  | DYY | 0.01364  | 0.02035  | 0.00000  | 0.02505  | -0.08530 |
| 152 | C8  | DZZ | 0.00576  | 0.01873  | 0.00000  | 0.00000  | -0.00939 |
| 153 | C8  | DXY | -0.01691 | 0.02242  | 0.00000  | 0.01910  | 0.04331  |
| 154 | C8  | DXZ | 0.00000  | 0.00000  | 0.02388  | 0.00000  | 0.00000  |
| 155 | C8  | DYZ | 0.00000  | 0.00000  | 0.04817  | 0.00000  | 0.00000  |
| 156 | H8  | S   | -0.07820 | -0.02704 | 0.00000  | 0.10042  | -0.12421 |
| 157 | H8  | S   | 1.41266  | 0.19734  | 0.00000  | -0.55942 | 0.54773  |
| 158 | H8  | PX  | -0.05885 | -0.01592 | 0.00000  | 0.03632  | -0.04408 |
| 159 | H8  | PY  | 0.03062  | -0.00421 | 0.00000  | -0.00304 | 0.02535  |
| 160 | H8  | PZ  | 0.00000  | 0.00000  | -0.00961 | 0.00000  | 0.00000  |
| 161 | C10 | S   | -0.01086 | 0.00475  | 0.00000  | 0.00313  | -0.01620 |
| 162 | C10 | S   | 0.15292  | 0.11517  | 0.00000  | -0.06240 | -0.07303 |

|     |     |     |          |          |          |          |          |
|-----|-----|-----|----------|----------|----------|----------|----------|
| 163 | C10 | PX  | -0.53911 | 0.12922  | 0.00000  | 0.00792  | -0.10317 |
| 164 | C10 | PY  | 0.02316  | 0.01869  | 0.00000  | 0.00615  | -0.22663 |
| 165 | C10 | PZ  | 0.00000  | 0.00000  | -0.05425 | 0.00000  | 0.00000  |
| 166 | C10 | S   | -0.61062 | -0.41966 | 0.00000  | 0.06110  | 0.72734  |
| 167 | C10 | PX  | 1.76168  | -0.30700 | 0.00000  | -0.15516 | -0.01185 |
| 168 | C10 | PY  | -0.20853 | -0.25237 | 0.00000  | -0.08945 | 0.91707  |
| 169 | C10 | PZ  | 0.00000  | 0.00000  | -0.08302 | 0.00000  | 0.00000  |
| 170 | C10 | DXX | -0.02818 | 0.01462  | 0.00000  | 0.01487  | -0.08763 |
| 171 | C10 | DYY | 0.00385  | 0.01055  | 0.00000  | -0.00947 | 0.01405  |
| 172 | C10 | DZZ | 0.02680  | -0.00346 | 0.00000  | -0.01576 | 0.04924  |
| 173 | C10 | DXY | -0.07116 | 0.00044  | 0.00000  | 0.01269  | 0.00423  |
| 174 | C10 | DXZ | 0.00000  | 0.00000  | 0.04584  | 0.00000  | 0.00000  |
| 175 | C10 | DYZ | 0.00000  | 0.00000  | -0.01389 | 0.00000  | 0.00000  |
| 176 | H16 | S   | 0.06006  | 0.01312  | 0.00000  | -0.03790 | -0.28706 |
| 177 | H16 | S   | -0.90755 | 0.07101  | 0.00000  | 0.03554  | 0.44720  |
| 178 | H16 | PX  | 0.03399  | -0.01343 | 0.00000  | 0.00581  | -0.00686 |
| 179 | H16 | PY  | -0.03953 | 0.00762  | 0.00000  | 0.00704  | 0.02563  |
| 180 | H16 | PZ  | 0.00000  | 0.00000  | 0.00919  | 0.00000  | 0.00000  |
| 181 | H18 | S   | -0.20992 | -0.02972 | 0.00000  | 0.07859  | -0.02687 |
| 182 | H18 | S   | 1.13908  | -0.17302 | 0.00000  | -0.20210 | 0.35309  |
| 183 | H18 | PX  | 0.06440  | -0.01160 | 0.00000  | -0.00488 | 0.04027  |
| 184 | H18 | PY  | 0.04515  | -0.00043 | 0.00000  | -0.01018 | -0.02164 |
| 185 | H18 | PZ  | 0.00000  | 0.00000  | -0.01369 | 0.00000  | 0.00000  |

|              |          |          |          |          |          |
|--------------|----------|----------|----------|----------|----------|
| MO:          | 86       | 87       | 88       | 89       | 90       |
| Eigenvalues: | 1.17402  | 1.20020  | 1.20276  | 1.21434  | 1.26398  |
| (ev):        | 31.94659 | 32.65918 | 32.72891 | 33.04385 | 34.39462 |

|    |    |     |          |          |          |          |          |
|----|----|-----|----------|----------|----------|----------|----------|
|    |    | A   | A        | A        | A        | A        |          |
| 1  | H1 | S   | 0.02982  | 0.15425  | -0.02512 | -0.00349 | 0.17840  |
| 2  | H1 | S   | -0.01642 | -0.18456 | -0.13090 | -0.06578 | 0.63368  |
| 3  | H1 | PX  | -0.00079 | 0.01526  | 0.00471  | -0.00137 | -0.02843 |
| 4  | H1 | PY  | -0.00075 | 0.01216  | -0.00375 | -0.00353 | 0.02074  |
| 5  | H1 | PZ  | 0.00000  | 0.00000  | 0.00000  | 0.00000  | 0.00000  |
| 6  | C1 | S   | 0.00043  | -0.00549 | -0.00708 | -0.00081 | -0.00759 |
| 7  | C1 | S   | -0.06755 | 0.34765  | -0.27529 | 0.12050  | 0.00406  |
| 8  | C1 | PX  | 0.04921  | -0.18605 | -0.02605 | -0.08978 | 0.30258  |
| 9  | C1 | PY  | -0.02900 | -0.11016 | 0.23567  | 0.66862  | 0.25385  |
| 10 | C1 | PZ  | 0.00000  | 0.00000  | 0.00000  | 0.00000  | 0.00000  |
| 11 | C1 | S   | 0.05709  | -1.55995 | 0.23819  | -1.29299 | -0.83817 |
| 12 | C1 | PX  | 0.03460  | 0.23998  | 0.03533  | 0.40369  | -0.76290 |
| 13 | C1 | PY  | 0.13812  | 0.23158  | -0.96220 | -3.81727 | -2.51393 |
| 14 | C1 | PZ  | 0.00000  | 0.00000  | 0.00000  | 0.00000  | 0.00000  |
| 15 | C1 | DXX | -0.01506 | 0.09285  | -0.00417 | 0.02323  | -0.01546 |
| 16 | C1 | DYY | 0.00244  | -0.05461 | -0.05176 | -0.03558 | -0.03666 |
| 17 | C1 | DZZ | 0.00448  | -0.00586 | -0.00328 | 0.01214  | 0.04332  |
| 18 | C1 | DXY | -0.00012 | -0.00791 | 0.02814  | 0.13399  | 0.07887  |
| 19 | C1 | DXZ | 0.00000  | 0.00000  | 0.00000  | 0.00000  | 0.00000  |
| 20 | C1 | DYZ | 0.00000  | 0.00000  | 0.00000  | 0.00000  | 0.00000  |
| 21 | C2 | S   | 0.00378  | 0.00391  | 0.00514  | -0.00095 | 0.00602  |
| 22 | C2 | S   | 0.22732  | -0.36090 | -0.14346 | -0.01731 | 0.15227  |
| 23 | C2 | PX  | -0.01359 | -0.14057 | 0.23699  | -0.00288 | 0.22004  |
| 24 | C2 | PY  | 0.02847  | -0.17489 | -0.44312 | 0.12019  | -0.18691 |
| 25 | C2 | PZ  | 0.00000  | 0.00000  | 0.00000  | 0.00000  | 0.00000  |

|    |    |     |          |          |          |          |          |
|----|----|-----|----------|----------|----------|----------|----------|
| 26 | C2 | S   | -0.62406 | 1.88838  | 0.72687  | 0.35458  | 0.57820  |
| 27 | C2 | PX  | -0.08463 | 0.34407  | -0.24005 | -0.05462 | -0.79441 |
| 28 | C2 | PY  | 0.21044  | 1.32691  | 2.62770  | -1.22201 | 3.18247  |
| 29 | C2 | PZ  | 0.00000  | 0.00000  | 0.00000  | 0.00000  | 0.00000  |
| 30 | C2 | DXX | 0.01515  | -0.07404 | 0.04534  | -0.03311 | 0.00484  |
| 31 | C2 | DYY | 0.01010  | 0.04205  | -0.02651 | 0.02238  | 0.06641  |
| 32 | C2 | DZZ | 0.00189  | -0.00075 | -0.02789 | 0.01855  | -0.03776 |
| 33 | C2 | DXY | -0.01155 | 0.02994  | 0.10390  | -0.03178 | 0.03956  |
| 34 | C2 | DXZ | 0.00000  | 0.00000  | 0.00000  | 0.00000  | 0.00000  |
| 35 | C2 | DYZ | 0.00000  | 0.00000  | 0.00000  | 0.00000  | 0.00000  |
| 36 | C3 | S   | -0.00064 | -0.01691 | 0.01196  | 0.01546  | -0.00012 |
| 37 | C3 | S   | 0.09304  | -0.25381 | 0.17235  | 0.39603  | 0.12115  |
| 38 | C3 | PX  | 0.07569  | -0.16453 | -0.15801 | 0.28299  | 0.39109  |
| 39 | C3 | PY  | -0.09202 | -0.22271 | 0.22287  | 0.27148  | -0.01952 |
| 40 | C3 | PZ  | 0.00000  | 0.00000  | 0.00000  | 0.00000  | 0.00000  |
| 41 | C3 | S   | -0.41952 | 1.51557  | 0.24854  | -3.02710 | 0.41529  |
| 42 | C3 | PX  | -0.22632 | 0.57515  | 0.01236  | -1.22808 | -2.81676 |
| 43 | C3 | PY  | 0.40820  | -0.02519 | -0.48145 | -0.92170 | -1.37299 |
| 44 | C3 | PZ  | 0.00000  | 0.00000  | 0.00000  | 0.00000  | 0.00000  |
| 45 | C3 | DXX | 0.01984  | -0.00689 | 0.02157  | -0.02161 | 0.10048  |
| 46 | C3 | DYY | -0.02341 | -0.01259 | 0.05255  | 0.03138  | -0.04985 |
| 47 | C3 | DZZ | 0.00830  | -0.00794 | -0.02493 | 0.01637  | -0.00246 |
| 48 | C3 | DXY | 0.01598  | 0.00546  | -0.09004 | -0.09059 | -0.00497 |
| 49 | C3 | DXZ | 0.00000  | 0.00000  | 0.00000  | 0.00000  | 0.00000  |
| 50 | C3 | DYZ | 0.00000  | 0.00000  | 0.00000  | 0.00000  | 0.00000  |
| 51 | C4 | S   | -0.00389 | 0.03589  | -0.00719 | 0.00592  | -0.00346 |
| 52 | C4 | S   | -0.06130 | 0.95229  | -0.29495 | -0.29042 | -0.43402 |
| 53 | C4 | PX  | 0.15713  | -0.24603 | -0.21065 | -0.53497 | -0.02683 |
| 54 | C4 | PY  | 0.10127  | 0.38069  | -0.18968 | 0.17592  | 0.37645  |
| 55 | C4 | PZ  | 0.00000  | 0.00000  | 0.00000  | 0.00000  | 0.00000  |
| 56 | C4 | S   | 0.09990  | -3.68930 | 0.69608  | 2.17466  | 0.62021  |
| 57 | C4 | PX  | -0.47829 | 1.91673  | 0.96408  | 3.17756  | 1.96570  |
| 58 | C4 | PY  | -0.19932 | -1.62233 | 0.09430  | -1.30887 | -1.90869 |
| 59 | C4 | PZ  | 0.00000  | 0.00000  | 0.00000  | 0.00000  | 0.00000  |
| 60 | C4 | DXX | 0.00332  | -0.02465 | -0.03117 | -0.02011 | -0.04903 |
| 61 | C4 | DYY | -0.03247 | 0.15276  | 0.02758  | 0.03902  | -0.01408 |
| 62 | C4 | DZZ | 0.01167  | 0.01379  | -0.02476 | -0.02185 | 0.00498  |
| 63 | C4 | DXY | -0.00875 | 0.01329  | 0.02124  | -0.13067 | -0.01064 |
| 64 | C4 | DXZ | 0.00000  | 0.00000  | 0.00000  | 0.00000  | 0.00000  |
| 65 | C4 | DYZ | 0.00000  | 0.00000  | 0.00000  | 0.00000  | 0.00000  |
| 66 | C5 | S   | 0.00506  | -0.03562 | 0.00534  | -0.02091 | 0.01112  |
| 67 | C5 | S   | 0.12064  | -0.71041 | 0.37952  | -0.64821 | 0.28367  |
| 68 | C5 | PX  | 0.04192  | -0.34590 | -0.19971 | -0.08425 | -0.15529 |
| 69 | C5 | PY  | 0.13953  | -0.40662 | -0.21747 | -0.10079 | -0.01835 |
| 70 | C5 | PZ  | 0.00000  | 0.00000  | 0.00000  | 0.00000  | 0.00000  |
| 71 | C5 | S   | -0.56635 | 2.04909  | -1.85001 | 3.38599  | -1.49108 |
| 72 | C5 | PX  | -0.13249 | 2.54989  | 1.52706  | 0.57690  | 2.54843  |
| 73 | C5 | PY  | -0.26009 | 2.02415  | 0.81927  | 0.46335  | 1.50861  |
| 74 | C5 | PZ  | 0.00000  | 0.00000  | 0.00000  | 0.00000  | 0.00000  |
| 75 | C5 | DXX | -0.01340 | 0.01516  | 0.01666  | 0.00844  | -0.00670 |
| 76 | C5 | DYY | 0.02403  | -0.13713 | 0.02368  | -0.09960 | 0.02490  |
| 77 | C5 | DZZ | 0.00180  | -0.00064 | 0.00325  | 0.00221  | 0.00326  |
| 78 | C5 | DXY | 0.01664  | -0.02790 | -0.09909 | 0.08860  | -0.01449 |
| 79 | C5 | DXZ | 0.00000  | 0.00000  | 0.00000  | 0.00000  | 0.00000  |

|     |    |     |          |          |          |          |          |
|-----|----|-----|----------|----------|----------|----------|----------|
| 80  | C5 | DYZ | 0.00000  | 0.00000  | 0.00000  | 0.00000  | 0.00000  |
| 81  | C6 | S   | 0.00362  | 0.01127  | -0.01671 | -0.00441 | 0.00683  |
| 82  | C6 | S   | 0.22548  | 0.00731  | -0.71668 | 0.21291  | 0.47793  |
| 83  | C6 | PX  | 0.01189  | 0.00726  | 0.28164  | -0.22466 | 0.45889  |
| 84  | C6 | PY  | -0.12125 | 0.13837  | -0.03506 | -0.00409 | -0.07566 |
| 85  | C6 | PZ  | 0.00000  | 0.00000  | 0.00000  | 0.00000  | 0.00000  |
| 86  | C6 | S   | -0.05713 | 0.38652  | 3.58425  | -1.43611 | -1.33693 |
| 87  | C6 | PX  | -0.31697 | -0.33185 | -1.75955 | 1.19538  | -3.22320 |
| 88  | C6 | PY  | 0.17908  | -0.09473 | -0.31675 | -0.05305 | 1.58787  |
| 89  | C6 | PZ  | 0.00000  | 0.00000  | 0.00000  | 0.00000  | 0.00000  |
| 90  | C6 | DXX | 0.01593  | 0.02789  | -0.01338 | -0.02724 | 0.04086  |
| 91  | C6 | DYY | 0.03097  | 0.01510  | 0.02129  | 0.00037  | 0.03170  |
| 92  | C6 | DZZ | -0.00401 | -0.01444 | -0.03711 | 0.02904  | -0.00852 |
| 93  | C6 | DXY | -0.03440 | -0.00245 | 0.03290  | 0.01251  | -0.10589 |
| 94  | C6 | DXZ | 0.00000  | 0.00000  | 0.00000  | 0.00000  | 0.00000  |
| 95  | C6 | DYZ | 0.00000  | 0.00000  | 0.00000  | 0.00000  | 0.00000  |
| 96  | C7 | S   | -0.00345 | 0.00828  | -0.01009 | -0.00074 | -0.01602 |
| 97  | C7 | S   | 0.08350  | -0.27386 | 0.27957  | 0.43891  | -0.57739 |
| 98  | C7 | PX  | 0.11993  | 0.13093  | -0.04332 | 0.18815  | -0.08773 |
| 99  | C7 | PY  | -0.15456 | -0.06913 | 0.38695  | 0.09112  | -0.01390 |
| 100 | C7 | PZ  | 0.00000  | 0.00000  | 0.00000  | 0.00000  | 0.00000  |
| 101 | C7 | S   | -0.15908 | -0.01967 | -0.24102 | -0.49171 | 0.91196  |
| 102 | C7 | PX  | -0.47843 | -0.15750 | 0.06766  | -0.50881 | 1.00507  |
| 103 | C7 | PY  | 0.72599  | -0.58314 | -1.04769 | 0.25107  | 0.03226  |
| 104 | C7 | PZ  | 0.00000  | 0.00000  | 0.00000  | 0.00000  | 0.00000  |
| 105 | C7 | DXX | -0.04215 | -0.04086 | 0.03900  | 0.00997  | -0.07766 |
| 106 | C7 | DYY | 0.04307  | 0.00038  | -0.01082 | 0.03111  | 0.00811  |
| 107 | C7 | DZZ | 0.00897  | -0.00496 | -0.00030 | 0.01406  | -0.01006 |
| 108 | C7 | DXY | -0.00554 | 0.03024  | 0.05358  | -0.01270 | 0.01595  |
| 109 | C7 | DXZ | 0.00000  | 0.00000  | 0.00000  | 0.00000  | 0.00000  |
| 110 | C7 | DYZ | 0.00000  | 0.00000  | 0.00000  | 0.00000  | 0.00000  |
| 111 | H3 | S   | -0.04781 | 0.15901  | 0.13852  | -0.06487 | 0.12199  |
| 112 | H3 | S   | 0.28303  | 0.81409  | -0.63899 | -0.21501 | 0.35505  |
| 113 | H3 | PX  | -0.00370 | -0.02095 | 0.00474  | 0.00375  | 0.00010  |
| 114 | H3 | PY  | -0.01988 | -0.04504 | 0.04639  | 0.02075  | -0.01778 |
| 115 | H3 | PZ  | 0.00000  | 0.00000  | 0.00000  | 0.00000  | 0.00000  |
| 116 | H4 | S   | -0.00839 | -0.07042 | 0.17849  | -0.22074 | 0.01434  |
| 117 | H4 | S   | 0.19953  | -0.62980 | 0.05735  | -0.24348 | 0.18890  |
| 118 | H4 | PX  | 0.01387  | -0.01809 | -0.01617 | -0.01871 | 0.02825  |
| 119 | H4 | PY  | -0.00895 | 0.03032  | -0.00574 | 0.00930  | -0.00002 |
| 120 | H4 | PZ  | 0.00000  | 0.00000  | 0.00000  | 0.00000  | 0.00000  |
| 121 | N1 | S   | 0.01386  | -0.00735 | -0.00269 | 0.00488  | 0.00297  |
| 122 | N1 | S   | -0.05895 | 0.04656  | -0.22175 | -0.04685 | -0.07672 |
| 123 | N1 | PX  | 0.13272  | 0.06901  | -0.11266 | -0.08660 | -0.01055 |
| 124 | N1 | PY  | -0.08366 | 0.13138  | 0.25103  | -0.03497 | -0.31504 |
| 125 | N1 | PZ  | 0.00000  | 0.00000  | 0.00000  | 0.00000  | 0.00000  |
| 126 | N1 | S   | -0.01992 | -0.04897 | -0.38978 | 0.36216  | 0.16757  |
| 127 | N1 | PX  | -0.31967 | -0.02024 | 0.52236  | -0.16813 | 0.34862  |
| 128 | N1 | PY  | -0.05802 | -0.16423 | -1.28405 | 0.29980  | 0.67328  |
| 129 | N1 | PZ  | 0.00000  | 0.00000  | 0.00000  | 0.00000  | 0.00000  |
| 130 | N1 | DXX | 0.00473  | 0.03278  | -0.02793 | -0.01518 | 0.02806  |
| 131 | N1 | DYY | 0.00108  | -0.03702 | -0.13240 | 0.01536  | -0.02815 |
| 132 | N1 | DZZ | -0.03357 | -0.00731 | 0.01309  | -0.00058 | -0.01728 |
| 133 | N1 | DXY | 0.01098  | -0.01298 | -0.04327 | 0.03308  | 0.04829  |



|     |     |     |          |          |          |          |          |
|-----|-----|-----|----------|----------|----------|----------|----------|
| 134 | N1  | DXZ | 0.00000  | 0.00000  | 0.00000  | 0.00000  | 0.00000  |
| 135 | N1  | DYZ | 0.00000  | 0.00000  | 0.00000  | 0.00000  | 0.00000  |
| 136 | H6  | S   | -0.02761 | -0.07790 | 0.20001  | -0.00233 | -0.20073 |
| 137 | H6  | S   | 0.06008  | 0.14334  | -0.41071 | 0.03213  | -0.41419 |
| 138 | H6  | PX  | 0.00982  | 0.00600  | -0.04339 | -0.00182 | -0.01086 |
| 139 | H6  | PY  | 0.01174  | -0.00761 | -0.01114 | -0.01366 | 0.01810  |
| 140 | H6  | PZ  | 0.00000  | 0.00000  | 0.00000  | 0.00000  | 0.00000  |
| 141 | C8  | S   | -0.00514 | 0.00803  | 0.01300  | -0.01142 | -0.00522 |
| 142 | C8  | S   | -0.27157 | 0.21871  | 0.36240  | -0.35597 | -0.20155 |
| 143 | C8  | PX  | -0.09786 | 0.10837  | -0.03349 | -0.08860 | 0.11672  |
| 144 | C8  | PY  | 0.08733  | 0.15060  | 0.18001  | -0.08374 | 0.02727  |
| 145 | C8  | PZ  | 0.00000  | 0.00000  | 0.00000  | 0.00000  | 0.00000  |
| 146 | C8  | S   | 0.72681  | -0.59598 | -1.40413 | 1.01669  | 0.88660  |
| 147 | C8  | PX  | 0.28867  | -0.14063 | 0.35052  | -0.11025 | -0.25600 |
| 148 | C8  | PY  | 0.00175  | -0.15192 | -0.55630 | -0.45321 | 0.43465  |
| 149 | C8  | PZ  | 0.00000  | 0.00000  | 0.00000  | 0.00000  | 0.00000  |
| 150 | C8  | DXX | 0.01477  | -0.00023 | -0.03786 | -0.06146 | -0.00267 |
| 151 | C8  | DYY | -0.00163 | 0.04755  | 0.06814  | -0.02468 | 0.00842  |
| 152 | C8  | DZZ | -0.01630 | -0.00853 | -0.00500 | 0.01393  | -0.00880 |
| 153 | C8  | DXY | -0.01850 | -0.01860 | 0.03514  | 0.00282  | -0.02917 |
| 154 | C8  | DXZ | 0.00000  | 0.00000  | 0.00000  | 0.00000  | 0.00000  |
| 155 | C8  | DYZ | 0.00000  | 0.00000  | 0.00000  | 0.00000  | 0.00000  |
| 156 | H8  | S   | -0.03794 | -0.18092 | -0.18951 | 0.10342  | -0.06811 |
| 157 | H8  | S   | 0.61753  | 0.08502  | -0.08783 | 0.43705  | -0.65646 |
| 158 | H8  | PX  | -0.01725 | -0.01819 | -0.00725 | -0.03463 | 0.01572  |
| 159 | H8  | PY  | 0.01462  | 0.00080  | -0.01749 | -0.01368 | -0.02375 |
| 160 | H8  | PZ  | 0.00000  | 0.00000  | 0.00000  | 0.00000  | 0.00000  |
| 161 | C10 | S   | 0.01956  | -0.00068 | 0.00709  | 0.01095  | -0.00503 |
| 162 | C10 | S   | -1.08540 | -0.04953 | -0.10628 | 0.08333  | 0.31377  |
| 163 | C10 | PX  | -0.03293 | 0.02342  | 0.19243  | -0.01595 | 0.09102  |
| 164 | C10 | PY  | 0.52524  | 0.18242  | 0.24474  | -0.00558 | 0.01001  |
| 165 | C10 | PZ  | 0.00000  | 0.00000  | 0.00000  | 0.00000  | 0.00000  |
| 166 | C10 | S   | 2.26069  | 0.35197  | 0.49022  | -0.83420 | -0.55050 |
| 167 | C10 | PX  | 0.07093  | -0.26290 | -0.52147 | 0.21881  | -0.35028 |
| 168 | C10 | PY  | -0.89295 | -0.28458 | -0.57391 | -0.32526 | 0.15355  |
| 169 | C10 | PZ  | 0.00000  | 0.00000  | 0.00000  | 0.00000  | 0.00000  |
| 170 | C10 | DXX | 0.15461  | 0.03697  | 0.07684  | 0.02278  | -0.01016 |
| 171 | C10 | DYY | -0.11933 | -0.01599 | -0.01465 | 0.00019  | -0.00017 |
| 172 | C10 | DZZ | -0.13357 | -0.02425 | -0.05887 | -0.00187 | 0.04114  |
| 173 | C10 | DXY | -0.02055 | -0.04529 | 0.00171  | 0.02498  | -0.02062 |
| 174 | C10 | DXZ | 0.00000  | 0.00000  | 0.00000  | 0.00000  | 0.00000  |
| 175 | C10 | DYZ | 0.00000  | 0.00000  | 0.00000  | 0.00000  | 0.00000  |
| 176 | H16 | S   | 0.50713  | 0.19854  | 0.05267  | -0.01495 | 0.04475  |
| 177 | H16 | S   | -1.33270 | -0.25463 | -0.22129 | -0.05092 | 0.39493  |
| 178 | H16 | PX  | 0.11384  | 0.01373  | 0.01124  | 0.00628  | -0.02611 |
| 179 | H16 | PY  | -0.02789 | -0.02136 | 0.00888  | 0.01244  | -0.00809 |
| 180 | H16 | PZ  | 0.00000  | 0.00000  | 0.00000  | 0.00000  | 0.00000  |
| 181 | H18 | S   | 0.55364  | -0.07371 | 0.15066  | 0.17433  | -0.16281 |
| 182 | H18 | S   | -1.22153 | -0.27387 | -0.75350 | 0.03319  | 0.15690  |
| 183 | H18 | PX  | -0.09914 | -0.01813 | -0.04504 | -0.00080 | 0.00088  |
| 184 | H18 | PY  | -0.01555 | 0.01729  | -0.01413 | -0.01162 | 0.01957  |
| 185 | H18 | PZ  | 0.00000  | 0.00000  | 0.00000  | 0.00000  | 0.00000  |

MO:

91

92

93

94

95

|              |          |          |          |          |          |
|--------------|----------|----------|----------|----------|----------|
| Eigenvalues: | 1.28550  | 1.29727  | 1.37046  | 1.40396  | 1.42126  |
| (ev):        | 34.98037 | 35.30045 | 37.29226 | 38.20382 | 38.67438 |

|    |    | A   | A        | A        | A        | A        |          |
|----|----|-----|----------|----------|----------|----------|----------|
| 1  | H1 | S   | 0.08176  | 0.32724  | 0.15722  | -0.30634 | -0.03606 |
| 2  | H1 | S   | -0.02695 | 0.38163  | 0.42653  | -0.30806 | -0.04483 |
| 3  | H1 | PX  | 0.01234  | 0.00127  | -0.02084 | -0.01848 | -0.00855 |
| 4  | H1 | PY  | 0.01871  | -0.01196 | 0.01444  | -0.00484 | -0.02472 |
| 5  | H1 | PZ  | 0.00000  | 0.00000  | 0.00000  | 0.00000  | 0.00000  |
| 6  | C1 | S   | -0.00066 | 0.01213  | 0.01388  | 0.02867  | 0.01285  |
| 7  | C1 | S   | 0.29001  | 0.69833  | -0.10942 | 0.49163  | 0.16520  |
| 8  | C1 | PX  | -0.14965 | -0.02991 | 0.29158  | -0.12523 | 0.03211  |
| 9  | C1 | PY  | -0.02896 | -0.04825 | -0.03227 | 0.13323  | -0.11749 |
| 10 | C1 | PZ  | 0.00000  | 0.00000  | 0.00000  | 0.00000  | 0.00000  |
| 11 | C1 | S   | -0.12888 | -2.00109 | -1.35539 | -2.39296 | -1.03875 |
| 12 | C1 | PX  | -0.11789 | -0.19617 | -0.65799 | 1.55221  | 0.31980  |
| 13 | C1 | PY  | 1.04893  | -1.92623 | 1.63202  | 0.46968  | 0.29624  |
| 14 | C1 | PZ  | 0.00000  | 0.00000  | 0.00000  | 0.00000  | 0.00000  |
| 15 | C1 | DXX | 0.05804  | 0.08845  | 0.02382  | 0.00571  | 0.03950  |
| 16 | C1 | DYY | -0.00334 | -0.00541 | -0.07681 | 0.02875  | -0.00672 |
| 17 | C1 | DZZ | -0.00271 | 0.02603  | 0.01414  | -0.01331 | -0.03332 |
| 18 | C1 | DXY | 0.04332  | 0.04223  | -0.04458 | -0.01454 | -0.06889 |
| 19 | C1 | DXZ | 0.00000  | 0.00000  | 0.00000  | 0.00000  | 0.00000  |
| 20 | C1 | DYZ | 0.00000  | 0.00000  | 0.00000  | 0.00000  | 0.00000  |
| 21 | C2 | S   | -0.00488 | 0.02849  | 0.00422  | 0.01894  | 0.01561  |
| 22 | C2 | S   | 0.10943  | 0.71394  | 0.68584  | 0.38720  | 0.43304  |
| 23 | C2 | PX  | -0.09137 | 0.04622  | 0.32807  | -0.12236 | 0.03778  |
| 24 | C2 | PY  | 0.25441  | 0.03002  | 0.10944  | -0.11050 | -0.17597 |
| 25 | C2 | PZ  | 0.00000  | 0.00000  | 0.00000  | 0.00000  | 0.00000  |
| 26 | C2 | S   | -0.85015 | -2.66294 | -1.04144 | -2.34365 | -1.60061 |
| 27 | C2 | PX  | 0.52175  | 0.02981  | -0.17769 | 0.23828  | -0.35260 |
| 28 | C2 | PY  | -1.59912 | -0.34802 | -1.28915 | 1.04880  | -0.08324 |
| 29 | C2 | PZ  | 0.00000  | 0.00000  | 0.00000  | 0.00000  | 0.00000  |
| 30 | C2 | DXX | 0.02458  | 0.10596  | 0.09063  | 0.08192  | 0.04987  |
| 31 | C2 | DYY | -0.04705 | -0.01826 | 0.02015  | -0.01507 | 0.01613  |
| 32 | C2 | DZZ | 0.03518  | 0.00385  | 0.00305  | -0.01658 | -0.02109 |
| 33 | C2 | DXY | -0.06637 | -0.00258 | -0.06779 | 0.02503  | 0.06818  |
| 34 | C2 | DXZ | 0.00000  | 0.00000  | 0.00000  | 0.00000  | 0.00000  |
| 35 | C2 | DYZ | 0.00000  | 0.00000  | 0.00000  | 0.00000  | 0.00000  |
| 36 | C3 | S   | 0.01468  | -0.02188 | -0.02150 | -0.00165 | -0.00108 |
| 37 | C3 | S   | 0.75768  | -0.34630 | -0.59223 | -0.20060 | -0.16853 |
| 38 | C3 | PX  | -0.34584 | 0.24689  | -0.22166 | -0.21903 | 0.03637  |
| 39 | C3 | PY  | -0.06371 | -0.14317 | 0.04520  | 0.06427  | -0.40622 |
| 40 | C3 | PZ  | 0.00000  | 0.00000  | 0.00000  | 0.00000  | 0.00000  |
| 41 | C3 | S   | -0.92276 | 0.44397  | 2.72739  | 2.56475  | -0.24545 |
| 42 | C3 | PX  | 2.14701  | -2.05724 | 1.80153  | 1.20666  | 0.16241  |
| 43 | C3 | PY  | -0.36205 | -0.70337 | 0.79418  | 0.58811  | 1.61450  |
| 44 | C3 | PZ  | 0.00000  | 0.00000  | 0.00000  | 0.00000  | 0.00000  |
| 45 | C3 | DXX | 0.06279  | -0.08470 | -0.00898 | 0.01259  | -0.03283 |
| 46 | C3 | DYY | 0.09910  | -0.02870 | -0.02030 | 0.04790  | -0.00016 |
| 47 | C3 | DZZ | -0.02325 | 0.04019  | -0.01903 | -0.04811 | -0.01672 |
| 48 | C3 | DXY | 0.00575  | 0.00763  | -0.01232 | 0.02368  | -0.00616 |
| 49 | C3 | DXZ | 0.00000  | 0.00000  | 0.00000  | 0.00000  | 0.00000  |
| 50 | C3 | DYZ | 0.00000  | 0.00000  | 0.00000  | 0.00000  | 0.00000  |

|     |    |     |          |          |          |          |          |
|-----|----|-----|----------|----------|----------|----------|----------|
| 51  | C4 | S   | -0.01411 | -0.02515 | 0.00801  | -0.00098 | 0.00729  |
| 52  | C4 | S   | -0.48466 | -0.56098 | 0.22895  | -0.00156 | 0.34241  |
| 53  | C4 | PX  | 0.06291  | -0.11912 | 0.09107  | -0.10442 | -0.07766 |
| 54  | C4 | PY  | 0.18599  | 0.05491  | 0.03764  | -0.08651 | -0.22133 |
| 55  | C4 | PZ  | 0.00000  | 0.00000  | 0.00000  | 0.00000  | 0.00000  |
| 56  | C4 | S   | 0.88028  | 3.08138  | -1.51700 | 0.91761  | -0.00728 |
| 57  | C4 | PX  | -1.31833 | 1.37951  | -0.50643 | -0.04630 | 0.43602  |
| 58  | C4 | PY  | 0.19437  | -0.47262 | -0.48189 | -0.24234 | 0.64138  |
| 59  | C4 | PZ  | 0.00000  | 0.00000  | 0.00000  | 0.00000  | 0.00000  |
| 60  | C4 | DXX | -0.06072 | -0.01445 | -0.01793 | -0.01309 | 0.06553  |
| 61  | C4 | DYY | -0.03733 | -0.07835 | 0.03797  | 0.08045  | 0.02918  |
| 62  | C4 | DZZ | 0.01574  | 0.01011  | 0.01225  | -0.05523 | -0.05023 |
| 63  | C4 | DXY | -0.04375 | -0.09783 | 0.04114  | -0.04163 | -0.00685 |
| 64  | C4 | DXZ | 0.00000  | 0.00000  | 0.00000  | 0.00000  | 0.00000  |
| 65  | C4 | DYZ | 0.00000  | 0.00000  | 0.00000  | 0.00000  | 0.00000  |
| 66  | C5 | S   | 0.00082  | -0.01153 | -0.02313 | -0.00057 | -0.00013 |
| 67  | C5 | S   | -0.32325 | -0.09708 | -0.70142 | -0.30423 | 0.05905  |
| 68  | C5 | PX  | 0.08772  | 0.25010  | 0.14531  | -0.17029 | 0.08149  |
| 69  | C5 | PY  | 0.39333  | -0.07417 | 0.17228  | 0.15922  | -0.13632 |
| 70  | C5 | PZ  | 0.00000  | 0.00000  | 0.00000  | 0.00000  | 0.00000  |
| 71  | C5 | S   | 0.30782  | 1.53529  | 2.47264  | -0.01419 | 0.96419  |
| 72  | C5 | PX  | -1.28314 | -1.02690 | -0.74840 | 0.11005  | -0.63324 |
| 73  | C5 | PY  | -1.69900 | 0.00968  | -0.15886 | -0.30626 | 0.40362  |
| 74  | C5 | PZ  | 0.00000  | 0.00000  | 0.00000  | 0.00000  | 0.00000  |
| 75  | C5 | DXX | -0.08350 | -0.01309 | -0.07596 | -0.03750 | 0.04544  |
| 76  | C5 | DYY | 0.02216  | 0.01425  | -0.03177 | -0.01234 | 0.00866  |
| 77  | C5 | DZZ | 0.01574  | -0.00742 | 0.00444  | -0.00675 | -0.05144 |
| 78  | C5 | DXY | 0.03588  | 0.08726  | 0.09820  | -0.01128 | 0.02265  |
| 79  | C5 | DXZ | 0.00000  | 0.00000  | 0.00000  | 0.00000  | 0.00000  |
| 80  | C5 | DYZ | 0.00000  | 0.00000  | 0.00000  | 0.00000  | 0.00000  |
| 81  | C6 | S   | -0.01131 | -0.01195 | 0.00271  | -0.01395 | -0.02923 |
| 82  | C6 | S   | -0.11480 | -0.59621 | 0.20704  | -0.18734 | -0.34913 |
| 83  | C6 | PX  | -0.26191 | 0.08022  | 0.12299  | 0.05287  | -0.03888 |
| 84  | C6 | PY  | 0.14445  | 0.08223  | 0.11042  | -0.34829 | -0.52072 |
| 85  | C6 | PZ  | 0.00000  | 0.00000  | 0.00000  | 0.00000  | 0.00000  |
| 86  | C6 | S   | 0.90232  | 0.77606  | -0.29715 | 0.06570  | 0.49993  |
| 87  | C6 | PX  | 1.66999  | -1.34615 | 0.42272  | -0.51427 | 0.91178  |
| 88  | C6 | PY  | -1.19651 | -0.26400 | -1.37201 | 2.21260  | 1.51123  |
| 89  | C6 | PZ  | 0.00000  | 0.00000  | 0.00000  | 0.00000  | 0.00000  |
| 90  | C6 | DXX | 0.08865  | -0.12690 | 0.01935  | 0.01684  | -0.03221 |
| 91  | C6 | DYY | -0.05800 | 0.03266  | 0.02509  | -0.10169 | -0.06317 |
| 92  | C6 | DZZ | -0.00934 | 0.00975  | -0.00121 | 0.01960  | 0.01284  |
| 93  | C6 | DXY | 0.01740  | 0.01748  | 0.00033  | -0.10850 | -0.05043 |
| 94  | C6 | DXZ | 0.00000  | 0.00000  | 0.00000  | 0.00000  | 0.00000  |
| 95  | C6 | DYZ | 0.00000  | 0.00000  | 0.00000  | 0.00000  | 0.00000  |
| 96  | C7 | S   | 0.01781  | 0.01049  | 0.00780  | -0.01511 | 0.00797  |
| 97  | C7 | S   | -0.16064 | -0.21952 | 0.46560  | 0.00645  | 0.09638  |
| 98  | C7 | PX  | 0.13173  | 0.01317  | -0.23737 | 0.06710  | -0.11892 |
| 99  | C7 | PY  | -0.10337 | -0.08076 | 0.00901  | 0.22930  | 0.11754  |
| 100 | C7 | PZ  | 0.00000  | 0.00000  | 0.00000  | 0.00000  | 0.00000  |
| 101 | C7 | S   | -0.29567 | 0.04003  | -0.20298 | -0.07480 | 1.04069  |
| 102 | C7 | PX  | 0.24149  | 0.87128  | -0.21329 | -0.44117 | 0.11201  |
| 103 | C7 | PY  | -0.90890 | 0.54323  | -1.16364 | -1.70549 | 0.21837  |
| 104 | C7 | PZ  | 0.00000  | 0.00000  | 0.00000  | 0.00000  | 0.00000  |

|     |    |     |          |          |          |          |          |
|-----|----|-----|----------|----------|----------|----------|----------|
| 105 | C7 | DXX | -0.04811 | -0.04501 | 0.10678  | -0.00598 | -0.02124 |
| 106 | C7 | DYY | 0.00944  | 0.04401  | -0.00731 | -0.02627 | 0.05857  |
| 107 | C7 | DZZ | -0.01769 | -0.01898 | -0.00852 | 0.01823  | -0.01690 |
| 108 | C7 | DXY | 0.03029  | 0.03877  | 0.06300  | 0.02121  | -0.03033 |
| 109 | C7 | DXZ | 0.00000  | 0.00000  | 0.00000  | 0.00000  | 0.00000  |
| 110 | C7 | DYZ | 0.00000  | 0.00000  | 0.00000  | 0.00000  | 0.00000  |
| 111 | H3 | S   | -0.02153 | -0.35358 | 0.35934  | 0.03713  | -0.19324 |
| 112 | H3 | S   | 0.14151  | -0.24210 | 0.38368  | -0.12784 | -0.35953 |
| 113 | H3 | PX  | -0.01774 | 0.02202  | 0.02805  | -0.00887 | 0.01961  |
| 114 | H3 | PY  | -0.00126 | -0.01223 | -0.00942 | 0.02440  | -0.00494 |
| 115 | H3 | PZ  | 0.00000  | 0.00000  | 0.00000  | 0.00000  | 0.00000  |
| 116 | H4 | S   | 0.18353  | -0.19809 | -0.33728 | -0.03815 | -0.30464 |
| 117 | H4 | S   | 0.40461  | -0.34485 | -0.30493 | 0.14481  | -0.41194 |
| 118 | H4 | PX  | 0.00331  | -0.02407 | 0.02287  | -0.00591 | -0.01451 |
| 119 | H4 | PY  | -0.01175 | 0.00270  | 0.00630  | -0.02448 | -0.01057 |
| 120 | H4 | PZ  | 0.00000  | 0.00000  | 0.00000  | 0.00000  | 0.00000  |
| 121 | N1 | S   | -0.00220 | -0.00896 | -0.00331 | 0.01448  | 0.01691  |
| 122 | N1 | S   | -0.21259 | 0.09644  | -0.32931 | 0.02551  | -0.05693 |
| 123 | N1 | PX  | -0.15482 | -0.04556 | -0.19598 | 0.14738  | 0.06348  |
| 124 | N1 | PY  | -0.07960 | 0.21213  | -0.04439 | -0.56504 | -0.20312 |
| 125 | N1 | PZ  | 0.00000  | 0.00000  | 0.00000  | 0.00000  | 0.00000  |
| 126 | N1 | S   | -0.18370 | 0.43118  | -0.37392 | -0.36359 | 0.02813  |
| 127 | N1 | PX  | 0.02983  | 0.65977  | 0.29038  | -0.60997 | -0.49118 |
| 128 | N1 | PY  | 0.16782  | -1.14489 | 0.24206  | 1.80582  | 1.35697  |
| 129 | N1 | PZ  | 0.00000  | 0.00000  | 0.00000  | 0.00000  | 0.00000  |
| 130 | N1 | DXX | -0.06661 | 0.06116  | -0.12914 | 0.00278  | -0.02666 |
| 131 | N1 | DYY | -0.05870 | -0.01632 | -0.05546 | 0.08035  | 0.03666  |
| 132 | N1 | DZZ | 0.01829  | 0.00402  | 0.01874  | -0.01576 | -0.00077 |
| 133 | N1 | DXY | -0.02600 | -0.06159 | -0.01238 | 0.02902  | 0.06025  |
| 134 | N1 | DXZ | 0.00000  | 0.00000  | 0.00000  | 0.00000  | 0.00000  |
| 135 | N1 | DYZ | 0.00000  | 0.00000  | 0.00000  | 0.00000  | 0.00000  |
| 136 | H6 | S   | 0.20989  | 0.15595  | 0.15235  | 0.33899  | 0.09566  |
| 137 | H6 | S   | 0.32292  | 0.30529  | -0.03528 | 0.32257  | 0.02483  |
| 138 | H6 | PX  | 0.00097  | 0.00663  | -0.02504 | 0.00758  | 0.00531  |
| 139 | H6 | PY  | 0.02640  | -0.01923 | -0.00505 | 0.03134  | -0.01595 |
| 140 | H6 | PZ  | 0.00000  | 0.00000  | 0.00000  | 0.00000  | 0.00000  |
| 141 | C8 | S   | 0.00231  | 0.01392  | 0.01506  | 0.02035  | -0.03931 |
| 142 | C8 | S   | -0.18717 | 0.61489  | 0.23334  | 0.50812  | -0.93291 |
| 143 | C8 | PX  | 0.12829  | -0.01745 | 0.13013  | 0.13961  | 0.01819  |
| 144 | C8 | PY  | 0.26971  | 0.10939  | -0.00452 | -0.35960 | 0.44445  |
| 145 | C8 | PZ  | 0.00000  | 0.00000  | 0.00000  | 0.00000  | 0.00000  |
| 146 | C8 | S   | 1.08124  | -1.70960 | -0.97578 | -2.61031 | 5.01961  |
| 147 | C8 | PX  | -0.38628 | 1.58371  | -1.64355 | -1.67094 | -1.11321 |
| 148 | C8 | PY  | -0.82178 | -0.76463 | -0.34514 | 3.58371  | -1.67611 |
| 149 | C8 | PZ  | 0.00000  | 0.00000  | 0.00000  | 0.00000  | 0.00000  |
| 150 | C8 | DXX | -0.04540 | 0.06596  | 0.04613  | 0.09253  | -0.03749 |
| 151 | C8 | DYY | 0.04923  | 0.00335  | -0.00123 | -0.03046 | 0.03081  |
| 152 | C8 | DZZ | -0.03020 | -0.00166 | -0.01707 | 0.01237  | -0.02865 |
| 153 | C8 | DXY | -0.00019 | 0.02652  | 0.06281  | -0.09352 | -0.02367 |
| 154 | C8 | DXZ | 0.00000  | 0.00000  | 0.00000  | 0.00000  | 0.00000  |
| 155 | C8 | DYZ | 0.00000  | 0.00000  | 0.00000  | 0.00000  | 0.00000  |
| 156 | H8 | S   | -0.45381 | -0.16295 | -0.02720 | 0.00512  | -0.04302 |
| 157 | H8 | S   | -0.05111 | -0.28127 | -0.05851 | -0.06090 | -0.13454 |
| 158 | H8 | PX  | -0.04372 | -0.00453 | 0.01627  | -0.00897 | 0.01128  |

|     |     |     |          |          |          |          |          |
|-----|-----|-----|----------|----------|----------|----------|----------|
| 159 | H8  | PY  | -0.00411 | 0.01594  | 0.00625  | -0.02494 | -0.01819 |
| 160 | H8  | PZ  | 0.00000  | 0.00000  | 0.00000  | 0.00000  | 0.00000  |
| 161 | C10 | S   | 0.00400  | -0.00729 | 0.00009  | -0.02719 | 0.02444  |
| 162 | C10 | S   | 0.60982  | -0.38589 | -0.09142 | -0.59623 | 0.96214  |
| 163 | C10 | PX  | 0.11875  | -0.01897 | 0.04527  | 0.12245  | 0.06046  |
| 164 | C10 | PY  | 0.26909  | -0.10203 | -0.02381 | -0.04487 | 0.18165  |
| 165 | C10 | PZ  | 0.00000  | 0.00000  | 0.00000  | 0.00000  | 0.00000  |
| 166 | C10 | S   | -1.77339 | 0.75961  | 0.12338  | 4.24857  | -4.34075 |
| 167 | C10 | PX  | -0.39742 | -0.78787 | 1.04415  | 0.02630  | 0.18280  |
| 168 | C10 | PY  | -0.85700 | 0.21952  | -0.13781 | 1.76899  | -1.60957 |
| 169 | C10 | PZ  | 0.00000  | 0.00000  | 0.00000  | 0.00000  | 0.00000  |
| 170 | C10 | DXX | 0.08486  | -0.02775 | 0.01331  | -0.13557 | 0.13646  |
| 171 | C10 | DYY | -0.02228 | 0.00075  | -0.00499 | 0.06026  | -0.10051 |
| 172 | C10 | DZZ | 0.01225  | -0.02774 | -0.02066 | 0.01375  | 0.05349  |
| 173 | C10 | DXY | -0.03093 | -0.07979 | 0.09428  | 0.01271  | 0.00941  |
| 174 | C10 | DXZ | 0.00000  | 0.00000  | 0.00000  | 0.00000  | 0.00000  |
| 175 | C10 | DYZ | 0.00000  | 0.00000  | 0.00000  | 0.00000  | 0.00000  |
| 176 | H16 | S   | 0.12906  | 0.16168  | -0.32658 | -0.00299 | 0.05007  |
| 177 | H16 | S   | 0.10385  | 0.02986  | -0.31721 | 0.00135  | 0.19028  |
| 178 | H16 | PX  | -0.01155 | 0.00665  | -0.00145 | -0.02060 | -0.01462 |
| 179 | H16 | PY  | 0.00178  | -0.02161 | 0.04309  | -0.03947 | 0.02355  |
| 180 | H16 | PZ  | 0.00000  | 0.00000  | 0.00000  | 0.00000  | 0.00000  |
| 181 | H18 | S   | -0.04625 | -0.24915 | 0.30252  | -0.18571 | 0.17691  |
| 182 | H18 | S   | -0.10693 | -0.30206 | 0.14054  | -0.06206 | 0.27466  |
| 183 | H18 | PX  | -0.01338 | 0.00056  | -0.01028 | -0.02758 | -0.00115 |
| 184 | H18 | PY  | 0.02227  | 0.02082  | -0.03963 | -0.00168 | 0.01812  |
| 185 | H18 | PZ  | 0.00000  | 0.00000  | 0.00000  | 0.00000  | 0.00000  |

|              |          |          |          |          |          |
|--------------|----------|----------|----------|----------|----------|
| MO:          | 96       | 97       | 98       | 99       | 100      |
| Eigenvalues: | 1.46880  | 1.47855  | 1.48237  | 1.57062  | 1.58697  |
| (ev):        | 39.96810 | 40.23338 | 40.33727 | 42.73883 | 43.18366 |

|    |    | A   | A        | A        | A        | A        |          |
|----|----|-----|----------|----------|----------|----------|----------|
| 1  | H1 | S   | 0.35209  | 0.00000  | 0.23318  | 0.00000  | 0.00000  |
| 2  | H1 | S   | 0.35735  | 0.00000  | 0.30278  | 0.00000  | 0.00000  |
| 3  | H1 | PX  | 0.02038  | 0.00000  | -0.00957 | 0.00000  | 0.00000  |
| 4  | H1 | PY  | -0.00626 | 0.00000  | -0.00076 | 0.00000  | 0.00000  |
| 5  | H1 | PZ  | 0.00000  | 0.04687  | 0.00000  | 0.08627  | 0.13416  |
| 6  | C1 | S   | 0.02858  | 0.00000  | 0.02352  | 0.00000  | 0.00000  |
| 7  | C1 | S   | 0.83761  | 0.00000  | 0.11966  | 0.00000  | 0.00000  |
| 8  | C1 | PX  | -0.20786 | 0.00000  | 0.15425  | 0.00000  | 0.00000  |
| 9  | C1 | PY  | 0.11396  | 0.00000  | -0.03319 | 0.00000  | 0.00000  |
| 10 | C1 | PZ  | 0.00000  | -0.00086 | 0.00000  | 0.05904  | 0.10554  |
| 11 | C1 | S   | -2.56910 | 0.00000  | -2.10165 | 0.00000  | 0.00000  |
| 12 | C1 | PX  | -0.33384 | 0.00000  | -0.54411 | 0.00000  | 0.00000  |
| 13 | C1 | PY  | 0.02333  | 0.00000  | 1.67934  | 0.00000  | 0.00000  |
| 14 | C1 | PZ  | 0.00000  | 0.02684  | 0.00000  | -0.04023 | -0.07801 |
| 15 | C1 | DXX | 0.13022  | 0.00000  | 0.10175  | 0.00000  | 0.00000  |
| 16 | C1 | DYY | -0.01550 | 0.00000  | -0.06327 | 0.00000  | 0.00000  |
| 17 | C1 | DZZ | -0.02005 | 0.00000  | -0.03850 | 0.00000  | 0.00000  |
| 18 | C1 | DXY | -0.00044 | 0.00000  | -0.00892 | 0.00000  | 0.00000  |
| 19 | C1 | DXZ | 0.00000  | 0.10179  | 0.00000  | 0.20242  | 0.31469  |
| 20 | C1 | DYZ | 0.00000  | 0.28078  | 0.00000  | -0.16259 | 0.12329  |
| 21 | C2 | S   | -0.00312 | 0.00000  | -0.01794 | 0.00000  | 0.00000  |

|    |    |     |          |          |          |          |          |
|----|----|-----|----------|----------|----------|----------|----------|
| 22 | C2 | S   | -0.26941 | 0.00000  | -0.27514 | 0.00000  | 0.00000  |
| 23 | C2 | PX  | -0.17505 | 0.00000  | 0.13011  | 0.00000  | 0.00000  |
| 24 | C2 | PY  | -0.11624 | 0.00000  | 0.04906  | 0.00000  | 0.00000  |
| 25 | C2 | PZ  | 0.00000  | -0.01510 | 0.00000  | 0.08056  | -0.02043 |
| 26 | C2 | S   | -0.50902 | 0.00000  | 2.14573  | 0.00000  | 0.00000  |
| 27 | C2 | PX  | -0.77960 | 0.00000  | -1.28472 | 0.00000  | 0.00000  |
| 28 | C2 | PY  | 0.82483  | 0.00000  | -1.95828 | 0.00000  | 0.00000  |
| 29 | C2 | PZ  | 0.00000  | 0.04217  | 0.00000  | -0.02004 | -0.04447 |
| 30 | C2 | DXX | -0.05654 | 0.00000  | -0.13208 | 0.00000  | 0.00000  |
| 31 | C2 | DYY | -0.00653 | 0.00000  | 0.09923  | 0.00000  | 0.00000  |
| 32 | C2 | DZZ | 0.01135  | 0.00000  | -0.01296 | 0.00000  | 0.00000  |
| 33 | C2 | DXY | 0.03686  | 0.00000  | 0.01120  | 0.00000  | 0.00000  |
| 34 | C2 | DXZ | 0.00000  | -0.10342 | 0.00000  | -0.25299 | 0.04389  |
| 35 | C2 | DYZ | 0.00000  | 0.25735  | 0.00000  | -0.13521 | -0.13824 |
| 36 | C3 | S   | -0.02373 | 0.00000  | 0.01995  | 0.00000  | 0.00000  |
| 37 | C3 | S   | -0.70914 | 0.00000  | 0.00682  | 0.00000  | 0.00000  |
| 38 | C3 | PX  | -0.24486 | 0.00000  | -0.14085 | 0.00000  | 0.00000  |
| 39 | C3 | PY  | -0.06796 | 0.00000  | -0.31938 | 0.00000  | 0.00000  |
| 40 | C3 | PZ  | 0.00000  | -0.02475 | 0.00000  | -0.04917 | -0.05419 |
| 41 | C3 | S   | 2.74285  | 0.00000  | 0.27212  | 0.00000  | 0.00000  |
| 42 | C3 | PX  | 1.81043  | 0.00000  | 3.79255  | 0.00000  | 0.00000  |
| 43 | C3 | PY  | -0.90454 | 0.00000  | 1.09394  | 0.00000  | 0.00000  |
| 44 | C3 | PZ  | 0.00000  | -0.02445 | 0.00000  | 0.12206  | 0.00673  |
| 45 | C3 | DXX | -0.01649 | 0.00000  | -0.04923 | 0.00000  | 0.00000  |
| 46 | C3 | DYY | -0.01161 | 0.00000  | 0.09565  | 0.00000  | 0.00000  |
| 47 | C3 | DZZ | -0.01584 | 0.00000  | -0.06522 | 0.00000  | 0.00000  |
| 48 | C3 | DXY | 0.00806  | 0.00000  | -0.04340 | 0.00000  | 0.00000  |
| 49 | C3 | DXZ | 0.00000  | -0.24107 | 0.00000  | 0.17967  | 0.13608  |
| 50 | C3 | DYZ | 0.00000  | -0.25201 | 0.00000  | -0.09060 | -0.32590 |
| 51 | C4 | S   | -0.01305 | 0.00000  | -0.00744 | 0.00000  | 0.00000  |
| 52 | C4 | S   | -0.48679 | 0.00000  | -0.22960 | 0.00000  | 0.00000  |
| 53 | C4 | PX  | -0.10235 | 0.00000  | 0.07744  | 0.00000  | 0.00000  |
| 54 | C4 | PY  | 0.09991  | 0.00000  | -0.01972 | 0.00000  | 0.00000  |
| 55 | C4 | PZ  | 0.00000  | -0.02140 | 0.00000  | 0.04130  | 0.02045  |
| 56 | C4 | S   | 1.15906  | 0.00000  | 0.34801  | 0.00000  | 0.00000  |
| 57 | C4 | PX  | 0.91413  | 0.00000  | -0.64028 | 0.00000  | 0.00000  |
| 58 | C4 | PY  | 0.56774  | 0.00000  | 0.03957  | 0.00000  | 0.00000  |
| 59 | C4 | PZ  | 0.00000  | 0.01092  | 0.00000  | -0.00419 | -0.02130 |
| 60 | C4 | DXX | -0.04617 | 0.00000  | 0.03550  | 0.00000  | 0.00000  |
| 61 | C4 | DYY | -0.01891 | 0.00000  | -0.00475 | 0.00000  | 0.00000  |
| 62 | C4 | DZZ | -0.01320 | 0.00000  | -0.04808 | 0.00000  | 0.00000  |
| 63 | C4 | DXY | -0.08643 | 0.00000  | 0.03964  | 0.00000  | 0.00000  |
| 64 | C4 | DXZ | 0.00000  | 0.26205  | 0.00000  | -0.11781 | 0.08316  |
| 65 | C4 | DYZ | 0.00000  | -0.02566 | 0.00000  | 0.23723  | 0.16087  |
| 66 | C5 | S   | 0.00752  | 0.00000  | 0.01711  | 0.00000  | 0.00000  |
| 67 | C5 | S   | 0.26518  | 0.00000  | 0.50402  | 0.00000  | 0.00000  |
| 68 | C5 | PX  | -0.08230 | 0.00000  | 0.08124  | 0.00000  | 0.00000  |
| 69 | C5 | PY  | -0.03450 | 0.00000  | -0.21202 | 0.00000  | 0.00000  |
| 70 | C5 | PZ  | 0.00000  | -0.01841 | 0.00000  | 0.03776  | 0.02920  |
| 71 | C5 | S   | -0.51248 | 0.00000  | -0.16967 | 0.00000  | 0.00000  |
| 72 | C5 | PX  | 0.90215  | 0.00000  | -0.82078 | 0.00000  | 0.00000  |
| 73 | C5 | PY  | -0.80435 | 0.00000  | 0.36843  | 0.00000  | 0.00000  |
| 74 | C5 | PZ  | 0.00000  | 0.00622  | 0.00000  | -0.01744 | 0.02584  |
| 75 | C5 | DXX | 0.00715  | 0.00000  | 0.04775  | 0.00000  | 0.00000  |

|     |    |     |          |          |          |          |          |
|-----|----|-----|----------|----------|----------|----------|----------|
| 76  | C5 | DYY | 0.05002  | 0.00000  | 0.03697  | 0.00000  | 0.00000  |
| 77  | C5 | DZZ | -0.01279 | 0.00000  | -0.03464 | 0.00000  | 0.00000  |
| 78  | C5 | DXY | -0.05132 | 0.00000  | 0.02029  | 0.00000  | 0.00000  |
| 79  | C5 | DXZ | 0.00000  | -0.25596 | 0.00000  | 0.08227  | -0.01447 |
| 80  | C5 | DYZ | 0.00000  | -0.04628 | 0.00000  | 0.25346  | 0.12361  |
| 81  | C6 | S   | 0.00336  | 0.00000  | -0.00846 | 0.00000  | 0.00000  |
| 82  | C6 | S   | 0.25616  | 0.00000  | 0.00842  | 0.00000  | 0.00000  |
| 83  | C6 | PX  | 0.10424  | 0.00000  | -0.46359 | 0.00000  | 0.00000  |
| 84  | C6 | PY  | -0.06757 | 0.00000  | -0.02901 | 0.00000  | 0.00000  |
| 85  | C6 | PZ  | 0.00000  | -0.00656 | 0.00000  | -0.02943 | -0.04813 |
| 86  | C6 | S   | -0.42322 | 0.00000  | 0.24520  | 0.00000  | 0.00000  |
| 87  | C6 | PX  | 0.15126  | 0.00000  | 4.68138  | 0.00000  | 0.00000  |
| 88  | C6 | PY  | 2.23739  | 0.00000  | 0.36925  | 0.00000  | 0.00000  |
| 89  | C6 | PZ  | 0.00000  | -0.02832 | 0.00000  | -0.01305 | 0.22659  |
| 90  | C6 | DXX | 0.05100  | 0.00000  | 0.02919  | 0.00000  | 0.00000  |
| 91  | C6 | DYY | -0.02527 | 0.00000  | -0.08077 | 0.00000  | 0.00000  |
| 92  | C6 | DZZ | -0.01269 | 0.00000  | 0.01819  | 0.00000  | 0.00000  |
| 93  | C6 | DXY | -0.00342 | 0.00000  | -0.06839 | 0.00000  | 0.00000  |
| 94  | C6 | DXZ | 0.00000  | 0.26754  | 0.00000  | -0.21345 | -0.09119 |
| 95  | C6 | DYZ | 0.00000  | -0.20465 | 0.00000  | -0.16717 | 0.08240  |
| 96  | C7 | S   | -0.00372 | 0.00000  | 0.03741  | 0.00000  | 0.00000  |
| 97  | C7 | S   | 0.03504  | 0.00000  | 0.61443  | 0.00000  | 0.00000  |
| 98  | C7 | PX  | -0.02993 | 0.00000  | -0.08502 | 0.00000  | 0.00000  |
| 99  | C7 | PY  | -0.18598 | 0.00000  | 0.08666  | 0.00000  | 0.00000  |
| 100 | C7 | PZ  | 0.00000  | -0.09141 | 0.00000  | -0.05841 | -0.04640 |
| 101 | C7 | S   | 0.00293  | 0.00000  | -2.79485 | 0.00000  | 0.00000  |
| 102 | C7 | PX  | -1.20302 | 0.00000  | 1.74568  | 0.00000  | 0.00000  |
| 103 | C7 | PY  | -1.77834 | 0.00000  | -2.05526 | 0.00000  | 0.00000  |
| 104 | C7 | PZ  | 0.00000  | 0.11677  | 0.00000  | -0.07420 | -0.00298 |
| 105 | C7 | DXX | 0.06880  | 0.00000  | -0.03590 | 0.00000  | 0.00000  |
| 106 | C7 | DYY | -0.05533 | 0.00000  | 0.10270  | 0.00000  | 0.00000  |
| 107 | C7 | DZZ | 0.00568  | 0.00000  | -0.04428 | 0.00000  | 0.00000  |
| 108 | C7 | DXY | 0.03810  | 0.00000  | 0.01162  | 0.00000  | 0.00000  |
| 109 | C7 | DXZ | 0.00000  | -0.20173 | 0.00000  | -0.28350 | 0.12062  |
| 110 | C7 | DYZ | 0.00000  | 0.07140  | 0.00000  | 0.03346  | 0.36828  |
| 111 | H3 | S   | -0.42691 | 0.00000  | -0.01238 | 0.00000  | 0.00000  |
| 112 | H3 | S   | -0.49435 | 0.00000  | -0.06675 | 0.00000  | 0.00000  |
| 113 | H3 | PX  | -0.01519 | 0.00000  | 0.01670  | 0.00000  | 0.00000  |
| 114 | H3 | PY  | -0.01343 | 0.00000  | -0.00601 | 0.00000  | 0.00000  |
| 115 | H3 | PZ  | 0.00000  | 0.02945  | 0.00000  | 0.07090  | 0.06825  |
| 116 | H4 | S   | 0.39287  | 0.00000  | -0.09257 | 0.00000  | 0.00000  |
| 117 | H4 | S   | 0.46767  | 0.00000  | -0.24050 | 0.00000  | 0.00000  |
| 118 | H4 | PX  | -0.02004 | 0.00000  | 0.00794  | 0.00000  | 0.00000  |
| 119 | H4 | PY  | 0.00576  | 0.00000  | 0.01490  | 0.00000  | 0.00000  |
| 120 | H4 | PZ  | 0.00000  | 0.02986  | 0.00000  | 0.07325  | 0.06004  |
| 121 | N1 | S   | -0.00358 | 0.00000  | -0.00023 | 0.00000  | 0.00000  |
| 122 | N1 | S   | -0.14004 | 0.00000  | 0.02303  | 0.00000  | 0.00000  |
| 123 | N1 | PX  | 0.07524  | 0.00000  | -0.15027 | 0.00000  | 0.00000  |
| 124 | N1 | PY  | 0.03745  | 0.00000  | -0.13100 | 0.00000  | 0.00000  |
| 125 | N1 | PZ  | 0.00000  | -0.08370 | 0.00000  | -0.03790 | 0.11746  |
| 126 | N1 | S   | 0.19625  | 0.00000  | -0.30537 | 0.00000  | 0.00000  |
| 127 | N1 | PX  | -0.20929 | 0.00000  | -1.16943 | 0.00000  | 0.00000  |
| 128 | N1 | PY  | 1.40402  | 0.00000  | 1.39159  | 0.00000  | 0.00000  |
| 129 | N1 | PZ  | 0.00000  | 0.08964  | 0.00000  | -0.03504 | -0.28934 |

|     |     |     |          |          |          |          |          |
|-----|-----|-----|----------|----------|----------|----------|----------|
| 130 | N1  | DXX | -0.08345 | 0.00000  | -0.00689 | 0.00000  | 0.00000  |
| 131 | N1  | DYY | 0.00184  | 0.00000  | 0.02265  | 0.00000  | 0.00000  |
| 132 | N1  | DZZ | -0.00168 | 0.00000  | 0.01057  | 0.00000  | 0.00000  |
| 133 | N1  | DXY | 0.04268  | 0.00000  | 0.06570  | 0.00000  | 0.00000  |
| 134 | N1  | DXZ | 0.00000  | 0.14574  | 0.00000  | 0.01123  | 0.04183  |
| 135 | N1  | DYZ | 0.00000  | 0.00931  | 0.00000  | 0.20030  | -0.10882 |
| 136 | H6  | S   | -0.23095 | 0.00000  | -0.44504 | 0.00000  | 0.00000  |
| 137 | H6  | S   | -0.17698 | 0.00000  | -0.70455 | 0.00000  | 0.00000  |
| 138 | H6  | PX  | 0.02866  | 0.00000  | 0.00152  | 0.00000  | 0.00000  |
| 139 | H6  | PY  | 0.01429  | 0.00000  | -0.01798 | 0.00000  | 0.00000  |
| 140 | H6  | PZ  | 0.00000  | 0.03852  | 0.00000  | 0.11335  | -0.02391 |
| 141 | C8  | S   | 0.00335  | 0.00000  | 0.00297  | 0.00000  | 0.00000  |
| 142 | C8  | S   | 0.02437  | 0.00000  | 0.15914  | 0.00000  | 0.00000  |
| 143 | C8  | PX  | 0.33581  | 0.00000  | -0.06204 | 0.00000  | 0.00000  |
| 144 | C8  | PY  | -0.00788 | 0.00000  | -0.40484 | 0.00000  | 0.00000  |
| 145 | C8  | PZ  | 0.00000  | 0.09873  | 0.00000  | 0.01253  | -0.02662 |
| 146 | C8  | S   | -0.30531 | 0.00000  | -0.68199 | 0.00000  | 0.00000  |
| 147 | C8  | PX  | -3.57722 | 0.00000  | -0.48597 | 0.00000  | 0.00000  |
| 148 | C8  | PY  | 0.21873  | 0.00000  | 5.04708  | 0.00000  | 0.00000  |
| 149 | C8  | PZ  | 0.00000  | -0.24358 | 0.00000  | 0.05252  | 0.10779  |
| 150 | C8  | DXX | 0.00931  | 0.00000  | 0.00429  | 0.00000  | 0.00000  |
| 151 | C8  | DYY | 0.01051  | 0.00000  | -0.00100 | 0.00000  | 0.00000  |
| 152 | C8  | DZZ | -0.00341 | 0.00000  | 0.01512  | 0.00000  | 0.00000  |
| 153 | C8  | DXY | -0.00802 | 0.00000  | -0.00142 | 0.00000  | 0.00000  |
| 154 | C8  | DXZ | 0.00000  | 0.00858  | 0.00000  | 0.23838  | -0.31908 |
| 155 | C8  | DYZ | 0.00000  | 0.20601  | 0.00000  | 0.15923  | -0.15634 |
| 156 | H8  | S   | 0.14954  | 0.00000  | -0.43854 | 0.00000  | 0.00000  |
| 157 | H8  | S   | 0.19932  | 0.00000  | -0.59414 | 0.00000  | 0.00000  |
| 158 | H8  | PX  | -0.00306 | 0.00000  | -0.05076 | 0.00000  | 0.00000  |
| 159 | H8  | PY  | -0.02030 | 0.00000  | -0.02237 | 0.00000  | 0.00000  |
| 160 | H8  | PZ  | 0.00000  | -0.06973 | 0.00000  | -0.14697 | -0.01716 |
| 161 | C10 | S   | 0.00261  | 0.00000  | -0.02273 | 0.00000  | 0.00000  |
| 162 | C10 | S   | 0.06467  | 0.00000  | -0.36424 | 0.00000  | 0.00000  |
| 163 | C10 | PX  | -0.02956 | 0.00000  | 0.16886  | 0.00000  | 0.00000  |
| 164 | C10 | PY  | 0.04756  | 0.00000  | 0.09353  | 0.00000  | 0.00000  |
| 165 | C10 | PZ  | 0.00000  | 0.04396  | 0.00000  | 0.03654  | -0.07658 |
| 166 | C10 | S   | -0.03913 | 0.00000  | 4.51643  | 0.00000  | 0.00000  |
| 167 | C10 | PX  | 2.03054  | 0.00000  | -0.29469 | 0.00000  | 0.00000  |
| 168 | C10 | PY  | -0.24883 | 0.00000  | 1.74596  | 0.00000  | 0.00000  |
| 169 | C10 | PZ  | 0.00000  | 0.07836  | 0.00000  | -0.01761 | 0.02753  |
| 170 | C10 | DXX | 0.02321  | 0.00000  | -0.12451 | 0.00000  | 0.00000  |
| 171 | C10 | DYY | -0.01209 | 0.00000  | 0.08516  | 0.00000  | 0.00000  |
| 172 | C10 | DZZ | -0.00545 | 0.00000  | 0.00617  | 0.00000  | 0.00000  |
| 173 | C10 | DXY | 0.14377  | 0.00000  | -0.01235 | 0.00000  | 0.00000  |
| 174 | C10 | DXZ | 0.00000  | -0.00871 | 0.00000  | 0.13069  | -0.16458 |
| 175 | C10 | DYZ | 0.00000  | -0.15089 | 0.00000  | -0.12950 | 0.17589  |
| 176 | H16 | S   | -0.39299 | 0.00000  | 0.00913  | 0.00000  | 0.00000  |
| 177 | H16 | S   | -0.62793 | 0.00000  | 0.08507  | 0.00000  | 0.00000  |
| 178 | H16 | PX  | 0.00307  | 0.00000  | -0.02055 | 0.00000  | 0.00000  |
| 179 | H16 | PY  | 0.04130  | 0.00000  | -0.03147 | 0.00000  | 0.00000  |
| 180 | H16 | PZ  | 0.00000  | 0.04569  | 0.00000  | 0.08034  | -0.10348 |
| 181 | H18 | S   | 0.41741  | 0.00000  | -0.09664 | 0.00000  | 0.00000  |
| 182 | H18 | S   | 0.51922  | 0.00000  | -0.24699 | 0.00000  | 0.00000  |
| 183 | H18 | PX  | -0.00320 | 0.00000  | -0.02819 | 0.00000  | 0.00000  |



|     |     |    |          |         |          |          |         |
|-----|-----|----|----------|---------|----------|----------|---------|
| 184 | H18 | PY | -0.04204 | 0.00000 | -0.02539 | 0.00000  | 0.00000 |
| 185 | H18 | PZ | 0.00000  | 0.04294 | 0.00000  | -0.01564 | 0.01945 |

|              |  |          |          |          |          |          |
|--------------|--|----------|----------|----------|----------|----------|
| MO:          |  | 101      | 102      | 103      | 104      | 105      |
| Eigenvalues: |  | 1.60573  | 1.61528  | 1.62909  | 1.64045  | 1.67320  |
| (ev):        |  | 43.69417 | 43.95390 | 44.32986 | 44.63889 | 45.53021 |

|    |    | A   | A        | A        | A        | A        |          |
|----|----|-----|----------|----------|----------|----------|----------|
| 1  | H1 | S   | 0.23470  | 0.00000  | 0.05320  | 0.00000  | 0.64365  |
| 2  | H1 | S   | 0.43635  | 0.00000  | -0.06868 | 0.00000  | 1.09696  |
| 3  | H1 | PX  | 0.01240  | 0.00000  | -0.02394 | 0.00000  | 0.03991  |
| 4  | H1 | PY  | 0.01161  | 0.00000  | 0.03883  | 0.00000  | -0.00900 |
| 5  | H1 | PZ  | 0.00000  | 0.06181  | 0.00000  | -0.02292 | 0.00000  |
| 6  | C1 | S   | -0.00321 | 0.00000  | 0.04221  | 0.00000  | -0.02074 |
| 7  | C1 | S   | -0.06720 | 0.00000  | 0.56814  | 0.00000  | -0.60185 |
| 8  | C1 | PX  | 0.02954  | 0.00000  | -0.01459 | 0.00000  | 0.26696  |
| 9  | C1 | PY  | 0.00961  | 0.00000  | 0.09405  | 0.00000  | 0.12267  |
| 10 | C1 | PZ  | 0.00000  | 0.03294  | 0.00000  | 0.00550  | 0.00000  |
| 11 | C1 | S   | 1.30979  | 0.00000  | -4.60293 | 0.00000  | 1.50755  |
| 12 | C1 | PX  | -1.47670 | 0.00000  | 1.06435  | 0.00000  | -3.36563 |
| 13 | C1 | PY  | 0.37033  | 0.00000  | 2.44930  | 0.00000  | 0.39395  |
| 14 | C1 | PZ  | 0.00000  | 0.07764  | 0.00000  | -0.04001 | 0.00000  |
| 15 | C1 | DXX | 0.03508  | 0.00000  | 0.09068  | 0.00000  | 0.06796  |
| 16 | C1 | DYY | -0.02836 | 0.00000  | -0.01168 | 0.00000  | -0.10330 |
| 17 | C1 | DZZ | 0.01968  | 0.00000  | -0.06557 | 0.00000  | 0.02037  |
| 18 | C1 | DXY | 0.03328  | 0.00000  | -0.02864 | 0.00000  | -0.03828 |
| 19 | C1 | DXZ | 0.00000  | 0.08318  | 0.00000  | -0.04438 | 0.00000  |
| 20 | C1 | DYZ | 0.00000  | -0.05265 | 0.00000  | 0.15297  | 0.00000  |
| 21 | C2 | S   | -0.03955 | 0.00000  | 0.03774  | 0.00000  | -0.02240 |
| 22 | C2 | S   | -0.39828 | 0.00000  | 0.68530  | 0.00000  | -0.58081 |
| 23 | C2 | PX  | 0.02904  | 0.00000  | 0.15409  | 0.00000  | -0.22243 |
| 24 | C2 | PY  | -0.25256 | 0.00000  | 0.11771  | 0.00000  | 0.03574  |
| 25 | C2 | PZ  | 0.00000  | -0.03971 | 0.00000  | -0.06354 | 0.00000  |
| 26 | C2 | S   | 3.96853  | 0.00000  | -3.59111 | 0.00000  | 1.89652  |
| 27 | C2 | PX  | 1.13775  | 0.00000  | -2.34958 | 0.00000  | 3.08026  |
| 28 | C2 | PY  | -1.09815 | 0.00000  | 0.29035  | 0.00000  | 0.09477  |
| 29 | C2 | PZ  | 0.00000  | 0.13075  | 0.00000  | 0.07116  | 0.00000  |
| 30 | C2 | DXX | -0.05529 | 0.00000  | -0.00505 | 0.00000  | 0.04023  |
| 31 | C2 | DYY | 0.01490  | 0.00000  | 0.02005  | 0.00000  | -0.09318 |
| 32 | C2 | DZZ | 0.06170  | 0.00000  | -0.02452 | 0.00000  | 0.03575  |
| 33 | C2 | DXY | -0.07482 | 0.00000  | 0.02012  | 0.00000  | 0.01844  |
| 34 | C2 | DXZ | 0.00000  | 0.11161  | 0.00000  | 0.22930  | 0.00000  |
| 35 | C2 | DYZ | 0.00000  | -0.15221 | 0.00000  | 0.01240  | 0.00000  |
| 36 | C3 | S   | -0.02363 | 0.00000  | 0.00302  | 0.00000  | 0.01699  |
| 37 | C3 | S   | -0.66667 | 0.00000  | -0.35574 | 0.00000  | 0.22284  |
| 38 | C3 | PX  | -0.10405 | 0.00000  | -0.43006 | 0.00000  | -0.40360 |
| 39 | C3 | PY  | 0.34631  | 0.00000  | -0.06764 | 0.00000  | -0.14553 |
| 40 | C3 | PZ  | 0.00000  | 0.06151  | 0.00000  | -0.00847 | 0.00000  |
| 41 | C3 | S   | 1.20682  | 0.00000  | 1.25758  | 0.00000  | -1.32959 |
| 42 | C3 | PX  | 1.00935  | 0.00000  | 4.09456  | 0.00000  | 1.70346  |
| 43 | C3 | PY  | -1.99571 | 0.00000  | 3.27783  | 0.00000  | 0.54717  |
| 44 | C3 | PZ  | 0.00000  | -0.20145 | 0.00000  | 0.04106  | 0.00000  |
| 45 | C3 | DXX | -0.12205 | 0.00000  | 0.03196  | 0.00000  | 0.07715  |
| 46 | C3 | DYY | 0.01818  | 0.00000  | 0.03822  | 0.00000  | -0.05557 |

|     |    |     |          |          |          |          |          |
|-----|----|-----|----------|----------|----------|----------|----------|
| 47  | C3 | DZZ | 0.03394  | 0.00000  | -0.09836 | 0.00000  | 0.00415  |
| 48  | C3 | DXY | -0.03233 | 0.00000  | -0.01399 | 0.00000  | -0.03982 |
| 49  | C3 | DXZ | 0.00000  | -0.06615 | 0.00000  | 0.14317  | 0.00000  |
| 50  | C3 | DYZ | 0.00000  | -0.02239 | 0.00000  | -0.28288 | 0.00000  |
| 51  | C4 | S   | -0.00132 | 0.00000  | -0.00856 | 0.00000  | 0.01375  |
| 52  | C4 | S   | 0.06266  | 0.00000  | -0.41206 | 0.00000  | 0.35643  |
| 53  | C4 | PX  | -0.04035 | 0.00000  | 0.17537  | 0.00000  | -0.24352 |
| 54  | C4 | PY  | 0.00240  | 0.00000  | 0.13305  | 0.00000  | -0.05123 |
| 55  | C4 | PZ  | 0.00000  | -0.01856 | 0.00000  | -0.08921 | 0.00000  |
| 56  | C4 | S   | -1.06085 | 0.00000  | 0.21046  | 0.00000  | -1.81053 |
| 57  | C4 | PX  | -0.03521 | 0.00000  | -0.89652 | 0.00000  | 0.81995  |
| 58  | C4 | PY  | 0.95012  | 0.00000  | -0.75453 | 0.00000  | 1.99137  |
| 59  | C4 | PZ  | 0.00000  | -0.02418 | 0.00000  | 0.06265  | 0.00000  |
| 60  | C4 | DXX | -0.00841 | 0.00000  | -0.08338 | 0.00000  | 0.07306  |
| 61  | C4 | DYY | -0.05312 | 0.00000  | 0.05946  | 0.00000  | -0.07764 |
| 62  | C4 | DZZ | 0.06484  | 0.00000  | -0.03161 | 0.00000  | 0.02548  |
| 63  | C4 | DXY | 0.00738  | 0.00000  | -0.01505 | 0.00000  | 0.00204  |
| 64  | C4 | DXZ | 0.00000  | -0.26325 | 0.00000  | -0.10994 | 0.00000  |
| 65  | C4 | DYZ | 0.00000  | -0.04471 | 0.00000  | -0.30412 | 0.00000  |
| 66  | C5 | S   | -0.00129 | 0.00000  | -0.01284 | 0.00000  | 0.00479  |
| 67  | C5 | S   | 0.07479  | 0.00000  | -0.29164 | 0.00000  | 0.23483  |
| 68  | C5 | PX  | 0.01428  | 0.00000  | -0.09271 | 0.00000  | 0.28473  |
| 69  | C5 | PY  | 0.09426  | 0.00000  | 0.01119  | 0.00000  | 0.01024  |
| 70  | C5 | PZ  | 0.00000  | -0.01748 | 0.00000  | -0.08131 | 0.00000  |
| 71  | C5 | S   | -0.66601 | 0.00000  | 1.37744  | 0.00000  | -0.98912 |
| 72  | C5 | PX  | 0.20175  | 0.00000  | 0.26432  | 0.00000  | -0.78882 |
| 73  | C5 | PY  | -0.49973 | 0.00000  | -1.20466 | 0.00000  | 0.99533  |
| 74  | C5 | PZ  | 0.00000  | -0.02070 | 0.00000  | 0.05941  | 0.00000  |
| 75  | C5 | DXX | -0.01134 | 0.00000  | -0.07592 | 0.00000  | 0.07414  |
| 76  | C5 | DYY | -0.05646 | 0.00000  | 0.08550  | 0.00000  | -0.07159 |
| 77  | C5 | DZZ | 0.08503  | 0.00000  | -0.04297 | 0.00000  | 0.02465  |
| 78  | C5 | DXY | -0.04963 | 0.00000  | 0.03577  | 0.00000  | 0.00121  |
| 79  | C5 | DXZ | 0.00000  | 0.30798  | 0.00000  | 0.18005  | 0.00000  |
| 80  | C5 | DYZ | 0.00000  | -0.06338 | 0.00000  | -0.30973 | 0.00000  |
| 81  | C6 | S   | -0.01564 | 0.00000  | -0.02094 | 0.00000  | 0.02038  |
| 82  | C6 | S   | 0.16709  | 0.00000  | -0.36215 | 0.00000  | 0.41215  |
| 83  | C6 | PX  | -0.19417 | 0.00000  | 0.14815  | 0.00000  | 0.28917  |
| 84  | C6 | PY  | 0.39410  | 0.00000  | -0.06301 | 0.00000  | -0.04230 |
| 85  | C6 | PZ  | 0.00000  | 0.07717  | 0.00000  | 0.04945  | 0.00000  |
| 86  | C6 | S   | -1.80798 | 0.00000  | 5.99370  | 0.00000  | -0.13841 |
| 87  | C6 | PX  | 2.92039  | 0.00000  | -0.16674 | 0.00000  | -1.09720 |
| 88  | C6 | PY  | -3.31005 | 0.00000  | 0.33309  | 0.00000  | -1.67574 |
| 89  | C6 | PZ  | 0.00000  | -0.12498 | 0.00000  | -0.18171 | 0.00000  |
| 90  | C6 | DXX | -0.05657 | 0.00000  | 0.06072  | 0.00000  | 0.08067  |
| 91  | C6 | DYY | -0.04720 | 0.00000  | 0.07254  | 0.00000  | -0.00808 |
| 92  | C6 | DZZ | 0.09747  | 0.00000  | -0.08619 | 0.00000  | -0.00100 |
| 93  | C6 | DXY | -0.06010 | 0.00000  | 0.01974  | 0.00000  | 0.04359  |
| 94  | C6 | DXZ | 0.00000  | 0.10668  | 0.00000  | -0.18580 | 0.00000  |
| 95  | C6 | DYZ | 0.00000  | 0.16496  | 0.00000  | -0.03529 | 0.00000  |
| 96  | C7 | S   | 0.04381  | 0.00000  | 0.01866  | 0.00000  | -0.00284 |
| 97  | C7 | S   | 0.83474  | 0.00000  | 0.11226  | 0.00000  | -0.19352 |
| 98  | C7 | PX  | -0.21692 | 0.00000  | 0.12044  | 0.00000  | 0.06689  |
| 99  | C7 | PY  | 0.15999  | 0.00000  | 0.20574  | 0.00000  | -0.00639 |
| 100 | C7 | PZ  | 0.00000  | -0.06268 | 0.00000  | -0.12865 | 0.00000  |

|     |    |     |          |          |          |          |          |
|-----|----|-----|----------|----------|----------|----------|----------|
| 101 | C7 | S   | -3.45760 | 0.00000  | -1.37941 | 0.00000  | -0.48163 |
| 102 | C7 | PX  | 0.83051  | 0.00000  | -2.18185 | 0.00000  | -0.86266 |
| 103 | C7 | PY  | -0.70204 | 0.00000  | 0.69440  | 0.00000  | 0.47067  |
| 104 | C7 | PZ  | 0.00000  | 0.15542  | 0.00000  | 0.07644  | 0.00000  |
| 105 | C7 | DXX | 0.09430  | 0.00000  | 0.09873  | 0.00000  | 0.00439  |
| 106 | C7 | DYY | 0.01718  | 0.00000  | -0.03440 | 0.00000  | -0.01474 |
| 107 | C7 | DZZ | -0.03555 | 0.00000  | -0.04725 | 0.00000  | 0.02414  |
| 108 | C7 | DXY | 0.05791  | 0.00000  | -0.10896 | 0.00000  | -0.05843 |
| 109 | C7 | DXZ | 0.00000  | -0.09901 | 0.00000  | -0.21162 | 0.00000  |
| 110 | C7 | DYZ | 0.00000  | 0.01264  | 0.00000  | 0.23441  | 0.00000  |
| 111 | H3 | S   | -0.12234 | 0.00000  | 0.18169  | 0.00000  | -0.35215 |
| 112 | H3 | S   | -0.19015 | 0.00000  | 0.30020  | 0.00000  | -0.64776 |
| 113 | H3 | PX  | -0.01628 | 0.00000  | -0.00251 | 0.00000  | 0.01010  |
| 114 | H3 | PY  | -0.00625 | 0.00000  | 0.00095  | 0.00000  | -0.03423 |
| 115 | H3 | PZ  | 0.00000  | -0.07731 | 0.00000  | -0.15162 | 0.00000  |
| 116 | H4 | S   | 0.22069  | 0.00000  | 0.16750  | 0.00000  | -0.19237 |
| 117 | H4 | S   | 0.37220  | 0.00000  | 0.23115  | 0.00000  | -0.39060 |
| 118 | H4 | PX  | -0.00019 | 0.00000  | 0.00030  | 0.00000  | -0.01944 |
| 119 | H4 | PY  | 0.00706  | 0.00000  | 0.01587  | 0.00000  | -0.02379 |
| 120 | H4 | PZ  | 0.00000  | -0.09620 | 0.00000  | -0.15832 | 0.00000  |
| 121 | N1 | S   | 0.00471  | 0.00000  | -0.00225 | 0.00000  | 0.00044  |
| 122 | N1 | S   | 0.09928  | 0.00000  | 0.18761  | 0.00000  | -0.08806 |
| 123 | N1 | PX  | 0.15628  | 0.00000  | -0.01977 | 0.00000  | -0.03524 |
| 124 | N1 | PY  | -0.33350 | 0.00000  | 0.15179  | 0.00000  | -0.06519 |
| 125 | N1 | PZ  | 0.00000  | -0.01191 | 0.00000  | -0.02854 | 0.00000  |
| 126 | N1 | S   | -0.15982 | 0.00000  | -0.14620 | 0.00000  | -0.42149 |
| 127 | N1 | PX  | -0.75668 | 0.00000  | 0.35364  | 0.00000  | 0.23253  |
| 128 | N1 | PY  | 1.41658  | 0.00000  | -1.99517 | 0.00000  | -1.08595 |
| 129 | N1 | PZ  | 0.00000  | 0.01214  | 0.00000  | 0.09910  | 0.00000  |
| 130 | N1 | DXX | 0.06359  | 0.00000  | 0.04519  | 0.00000  | -0.01318 |
| 131 | N1 | DYY | -0.00175 | 0.00000  | 0.00075  | 0.00000  | -0.03579 |
| 132 | N1 | DZZ | 0.00113  | 0.00000  | -0.00001 | 0.00000  | 0.02305  |
| 133 | N1 | DXY | -0.05802 | 0.00000  | -0.01337 | 0.00000  | 0.00304  |
| 134 | N1 | DXZ | 0.00000  | 0.20278  | 0.00000  | -0.10764 | 0.00000  |
| 135 | N1 | DYZ | 0.00000  | -0.23406 | 0.00000  | 0.13400  | 0.00000  |
| 136 | H6 | S   | -0.00172 | 0.00000  | -0.25534 | 0.00000  | 0.56581  |
| 137 | H6 | S   | 0.08559  | 0.00000  | -0.52950 | 0.00000  | 0.97426  |
| 138 | H6 | PX  | -0.01493 | 0.00000  | 0.02173  | 0.00000  | -0.04102 |
| 139 | H6 | PY  | 0.02641  | 0.00000  | 0.00877  | 0.00000  | -0.01611 |
| 140 | H6 | PZ  | 0.00000  | -0.01781 | 0.00000  | -0.10407 | 0.00000  |
| 141 | C8 | S   | -0.00205 | 0.00000  | -0.01933 | 0.00000  | 0.00202  |
| 142 | C8 | S   | -0.34885 | 0.00000  | -0.47075 | 0.00000  | -0.00898 |
| 143 | C8 | PX  | -0.20779 | 0.00000  | -0.44455 | 0.00000  | -0.21274 |
| 144 | C8 | PY  | 0.33708  | 0.00000  | -0.08884 | 0.00000  | -0.20834 |
| 145 | C8 | PZ  | 0.00000  | -0.00388 | 0.00000  | 0.01628  | 0.00000  |
| 146 | C8 | S   | 4.36494  | 0.00000  | -0.45535 | 0.00000  | -1.78246 |
| 147 | C8 | PX  | 0.58506  | 0.00000  | 3.08165  | 0.00000  | 1.64697  |
| 148 | C8 | PY  | -4.19067 | 0.00000  | 0.40119  | 0.00000  | 1.44049  |
| 149 | C8 | PZ  | 0.00000  | 0.01917  | 0.00000  | -0.03718 | 0.00000  |
| 150 | C8 | DXX | 0.11733  | 0.00000  | -0.10037 | 0.00000  | -0.07435 |
| 151 | C8 | DYY | 0.02887  | 0.00000  | -0.00886 | 0.00000  | -0.03904 |
| 152 | C8 | DZZ | -0.07850 | 0.00000  | 0.01934  | 0.00000  | 0.06899  |
| 153 | C8 | DXY | -0.01820 | 0.00000  | 0.02019  | 0.00000  | 0.00163  |
| 154 | C8 | DXZ | 0.00000  | -0.18752 | 0.00000  | 0.14082  | 0.00000  |

|     |     |     |          |          |          |          |          |
|-----|-----|-----|----------|----------|----------|----------|----------|
| 155 | C8  | DYZ | 0.00000  | 0.37288  | 0.00000  | -0.05044 | 0.00000  |
| 156 | H8  | S   | 0.12507  | 0.00000  | 0.67939  | 0.00000  | 0.26270  |
| 157 | H8  | S   | -0.07844 | 0.00000  | 0.95111  | 0.00000  | 0.39436  |
| 158 | H8  | PX  | 0.02544  | 0.00000  | 0.03823  | 0.00000  | 0.02108  |
| 159 | H8  | PY  | 0.01667  | 0.00000  | -0.03878 | 0.00000  | -0.01580 |
| 160 | H8  | PZ  | 0.00000  | -0.01468 | 0.00000  | -0.14691 | 0.00000  |
| 161 | C10 | S   | 0.03075  | 0.00000  | 0.00390  | 0.00000  | -0.01121 |
| 162 | C10 | S   | 0.20284  | 0.00000  | 0.16609  | 0.00000  | -0.12054 |
| 163 | C10 | PX  | 0.09807  | 0.00000  | 0.00150  | 0.00000  | 0.00136  |
| 164 | C10 | PY  | -0.29059 | 0.00000  | 0.11132  | 0.00000  | 0.07779  |
| 165 | C10 | PZ  | 0.00000  | 0.13965  | 0.00000  | -0.02475 | 0.00000  |
| 166 | C10 | S   | -4.78029 | 0.00000  | 0.23405  | 0.00000  | 1.83212  |
| 167 | C10 | PX  | -1.26447 | 0.00000  | -1.56879 | 0.00000  | -0.74253 |
| 168 | C10 | PY  | -1.68857 | 0.00000  | 0.09094  | 0.00000  | 0.81819  |
| 169 | C10 | PZ  | 0.00000  | -0.10333 | 0.00000  | 0.02708  | 0.00000  |
| 170 | C10 | DXX | 0.08434  | 0.00000  | 0.01743  | 0.00000  | -0.06108 |
| 171 | C10 | DYY | -0.10277 | 0.00000  | 0.03004  | 0.00000  | 0.05091  |
| 172 | C10 | DZZ | -0.00200 | 0.00000  | -0.01360 | 0.00000  | 0.02693  |
| 173 | C10 | DXY | -0.09188 | 0.00000  | -0.09460 | 0.00000  | -0.03470 |
| 174 | C10 | DXZ | 0.00000  | -0.17938 | 0.00000  | 0.16650  | 0.00000  |
| 175 | C10 | DYZ | 0.00000  | -0.32017 | 0.00000  | 0.04691  | 0.00000  |
| 176 | H16 | S   | 0.33587  | 0.00000  | 0.25345  | 0.00000  | 0.09543  |
| 177 | H16 | S   | 0.43461  | 0.00000  | 0.45279  | 0.00000  | 0.24638  |
| 178 | H16 | PX  | -0.02746 | 0.00000  | 0.00459  | 0.00000  | 0.00900  |
| 179 | H16 | PY  | -0.00259 | 0.00000  | -0.02302 | 0.00000  | -0.01947 |
| 180 | H16 | PZ  | 0.00000  | 0.02362  | 0.00000  | 0.05373  | 0.00000  |
| 181 | H18 | S   | -0.10308 | 0.00000  | -0.27759 | 0.00000  | -0.16883 |
| 182 | H18 | S   | -0.28653 | 0.00000  | -0.47463 | 0.00000  | -0.22871 |
| 183 | H18 | PX  | -0.00794 | 0.00000  | 0.01184  | 0.00000  | -0.00055 |
| 184 | H18 | PY  | 0.04578  | 0.00000  | 0.02161  | 0.00000  | 0.00430  |
| 185 | H18 | PZ  | 0.00000  | 0.13878  | 0.00000  | -0.07727 | 0.00000  |

|              |          |          |          |          |          |
|--------------|----------|----------|----------|----------|----------|
| MO:          | 106      | 107      | 108      | 109      | 110      |
| Eigenvalues: | 1.67544  | 1.69183  | 1.70830  | 1.71739  | 1.75678  |
| (ev):        | 45.59108 | 46.03698 | 46.48529 | 46.73262 | 47.80450 |

|    |    | A   | A        | A        | A        | A        |          |
|----|----|-----|----------|----------|----------|----------|----------|
| 1  | H1 | S   | 0.00000  | 0.00000  | 0.00000  | 0.18877  | 0.00000  |
| 2  | H1 | S   | 0.00000  | 0.00000  | 0.00000  | 0.39725  | 0.00000  |
| 3  | H1 | PX  | 0.00000  | 0.00000  | 0.00000  | 0.01369  | 0.00000  |
| 4  | H1 | PY  | 0.00000  | 0.00000  | 0.00000  | 0.02313  | 0.00000  |
| 5  | H1 | PZ  | -0.11533 | -0.08923 | -0.13202 | 0.00000  | -0.05594 |
| 6  | C1 | S   | 0.00000  | 0.00000  | 0.00000  | -0.00257 | 0.00000  |
| 7  | C1 | S   | 0.00000  | 0.00000  | 0.00000  | 0.06141  | 0.00000  |
| 8  | C1 | PX  | 0.00000  | 0.00000  | 0.00000  | -0.01189 | 0.00000  |
| 9  | C1 | PY  | 0.00000  | 0.00000  | 0.00000  | -0.27039 | 0.00000  |
| 10 | C1 | PZ  | -0.08720 | -0.05664 | -0.08988 | 0.00000  | -0.04050 |
| 11 | C1 | S   | 0.00000  | 0.00000  | 0.00000  | -0.16957 | 0.00000  |
| 12 | C1 | PX  | 0.00000  | 0.00000  | 0.00000  | -0.95131 | 0.00000  |
| 13 | C1 | PY  | 0.00000  | 0.00000  | 0.00000  | 0.46300  | 0.00000  |
| 14 | C1 | PZ  | 0.12742  | -0.00768 | 0.06374  | 0.00000  | 0.07131  |
| 15 | C1 | DXX | 0.00000  | 0.00000  | 0.00000  | 0.03049  | 0.00000  |
| 16 | C1 | DYY | 0.00000  | 0.00000  | 0.00000  | -0.02803 | 0.00000  |
| 17 | C1 | DZZ | 0.00000  | 0.00000  | 0.00000  | 0.04741  | 0.00000  |

|    |    |     |          |          |          |          |          |
|----|----|-----|----------|----------|----------|----------|----------|
| 18 | C1 | DXY | 0.00000  | 0.00000  | 0.00000  | 0.08502  | 0.00000  |
| 19 | C1 | DXZ | -0.27503 | -0.15978 | -0.20844 | 0.00000  | -0.09342 |
| 20 | C1 | DYZ | 0.15515  | 0.20716  | -0.08253 | 0.00000  | -0.07058 |
| 21 | C2 | S   | 0.00000  | 0.00000  | 0.00000  | -0.01510 | 0.00000  |
| 22 | C2 | S   | 0.00000  | 0.00000  | 0.00000  | -0.26223 | 0.00000  |
| 23 | C2 | PX  | 0.00000  | 0.00000  | 0.00000  | -0.09078 | 0.00000  |
| 24 | C2 | PY  | 0.00000  | 0.00000  | 0.00000  | 0.17020  | 0.00000  |
| 25 | C2 | PZ  | 0.13779  | -0.02831 | -0.07732 | 0.00000  | -0.00489 |
| 26 | C2 | S   | 0.00000  | 0.00000  | 0.00000  | 1.96870  | 0.00000  |
| 27 | C2 | PX  | 0.00000  | 0.00000  | 0.00000  | 1.18305  | 0.00000  |
| 28 | C2 | PY  | 0.00000  | 0.00000  | 0.00000  | -0.09343 | 0.00000  |
| 29 | C2 | PZ  | -0.15731 | 0.08355  | -0.01151 | 0.00000  | -0.05747 |
| 30 | C2 | DXX | 0.00000  | 0.00000  | 0.00000  | -0.02408 | 0.00000  |
| 31 | C2 | DYY | 0.00000  | 0.00000  | 0.00000  | -0.01570 | 0.00000  |
| 32 | C2 | DZZ | 0.00000  | 0.00000  | 0.00000  | 0.02371  | 0.00000  |
| 33 | C2 | DXY | 0.00000  | 0.00000  | 0.00000  | 0.09297  | 0.00000  |
| 34 | C2 | DXZ | -0.37765 | 0.06346  | 0.17859  | 0.00000  | -0.01868 |
| 35 | C2 | DYZ | -0.12088 | -0.31640 | 0.02135  | 0.00000  | 0.04371  |
| 36 | C3 | S   | 0.00000  | 0.00000  | 0.00000  | 0.01646  | 0.00000  |
| 37 | C3 | S   | 0.00000  | 0.00000  | 0.00000  | 0.28890  | 0.00000  |
| 38 | C3 | PX  | 0.00000  | 0.00000  | 0.00000  | -0.24303 | 0.00000  |
| 39 | C3 | PY  | 0.00000  | 0.00000  | 0.00000  | 0.43542  | 0.00000  |
| 40 | C3 | PZ  | 0.02903  | -0.02479 | 0.05502  | 0.00000  | 0.02598  |
| 41 | C3 | S   | 0.00000  | 0.00000  | 0.00000  | -0.36275 | 0.00000  |
| 42 | C3 | PX  | 0.00000  | 0.00000  | 0.00000  | 3.64418  | 0.00000  |
| 43 | C3 | PY  | 0.00000  | 0.00000  | 0.00000  | -4.71179 | 0.00000  |
| 44 | C3 | PZ  | -0.15028 | 0.14342  | -0.10873 | 0.00000  | -0.14665 |
| 45 | C3 | DXX | 0.00000  | 0.00000  | 0.00000  | 0.01213  | 0.00000  |
| 46 | C3 | DYY | 0.00000  | 0.00000  | 0.00000  | 0.05542  | 0.00000  |
| 47 | C3 | DZZ | 0.00000  | 0.00000  | 0.00000  | -0.01514 | 0.00000  |
| 48 | C3 | DXY | 0.00000  | 0.00000  | 0.00000  | -0.01658 | 0.00000  |
| 49 | C3 | DXZ | -0.01274 | -0.06082 | 0.34403  | 0.00000  | 0.22271  |
| 50 | C3 | DYZ | -0.06707 | -0.02286 | 0.09469  | 0.00000  | 0.03032  |
| 51 | C4 | S   | 0.00000  | 0.00000  | 0.00000  | -0.03518 | 0.00000  |
| 52 | C4 | S   | 0.00000  | 0.00000  | 0.00000  | -0.66185 | 0.00000  |
| 53 | C4 | PX  | 0.00000  | 0.00000  | 0.00000  | -0.10352 | 0.00000  |
| 54 | C4 | PY  | 0.00000  | 0.00000  | 0.00000  | 0.28739  | 0.00000  |
| 55 | C4 | PZ  | -0.12278 | -0.04437 | 0.02767  | 0.00000  | 0.00589  |
| 56 | C4 | S   | 0.00000  | 0.00000  | 0.00000  | 2.05968  | 0.00000  |
| 57 | C4 | PX  | 0.00000  | 0.00000  | 0.00000  | -1.28250 | 0.00000  |
| 58 | C4 | PY  | 0.00000  | 0.00000  | 0.00000  | -2.78021 | 0.00000  |
| 59 | C4 | PZ  | 0.05443  | 0.02186  | -0.01387 | 0.00000  | -0.00793 |
| 60 | C4 | DXX | 0.00000  | 0.00000  | 0.00000  | -0.03755 | 0.00000  |
| 61 | C4 | DYY | 0.00000  | 0.00000  | 0.00000  | -0.01356 | 0.00000  |
| 62 | C4 | DZZ | 0.00000  | 0.00000  | 0.00000  | 0.05610  | 0.00000  |
| 63 | C4 | DXY | 0.00000  | 0.00000  | 0.00000  | 0.06489  | 0.00000  |
| 64 | C4 | DXZ | -0.12380 | 0.22358  | 0.24843  | 0.00000  | 0.03639  |
| 65 | C4 | DYZ | -0.36740 | -0.12138 | 0.00313  | 0.00000  | -0.01615 |
| 66 | C5 | S   | 0.00000  | 0.00000  | 0.00000  | 0.03517  | 0.00000  |
| 67 | C5 | S   | 0.00000  | 0.00000  | 0.00000  | 0.74956  | 0.00000  |
| 68 | C5 | PX  | 0.00000  | 0.00000  | 0.00000  | 0.03968  | 0.00000  |
| 69 | C5 | PY  | 0.00000  | 0.00000  | 0.00000  | -0.22056 | 0.00000  |
| 70 | C5 | PZ  | 0.06371  | 0.12183  | 0.00690  | 0.00000  | -0.00069 |
| 71 | C5 | S   | 0.00000  | 0.00000  | 0.00000  | -3.32226 | 0.00000  |

|     |    |     |          |          |          |          |          |
|-----|----|-----|----------|----------|----------|----------|----------|
| 72  | C5 | PX  | 0.00000  | 0.00000  | 0.00000  | -1.59912 | 0.00000  |
| 73  | C5 | PY  | 0.00000  | 0.00000  | 0.00000  | 3.19302  | 0.00000  |
| 74  | C5 | PZ  | -0.01307 | -0.08621 | 0.01572  | 0.00000  | 0.01088  |
| 75  | C5 | DXX | 0.00000  | 0.00000  | 0.00000  | -0.01023 | 0.00000  |
| 76  | C5 | DYY | 0.00000  | 0.00000  | 0.00000  | -0.03074 | 0.00000  |
| 77  | C5 | DZZ | 0.00000  | 0.00000  | 0.00000  | 0.04315  | 0.00000  |
| 78  | C5 | DXY | 0.00000  | 0.00000  | 0.00000  | 0.05761  | 0.00000  |
| 79  | C5 | DXZ | 0.11412  | -0.14703 | -0.26506 | 0.00000  | -0.06402 |
| 80  | C5 | DYZ | 0.23229  | 0.29717  | -0.06080 | 0.00000  | -0.01869 |
| 81  | C6 | S   | 0.00000  | 0.00000  | 0.00000  | -0.03676 | 0.00000  |
| 82  | C6 | S   | 0.00000  | 0.00000  | 0.00000  | -0.65305 | 0.00000  |
| 83  | C6 | PX  | 0.00000  | 0.00000  | 0.00000  | -0.03058 | 0.00000  |
| 84  | C6 | PY  | 0.00000  | 0.00000  | 0.00000  | -0.20266 | 0.00000  |
| 85  | C6 | PZ  | -0.05427 | 0.07636  | -0.00733 | 0.00000  | -0.01603 |
| 86  | C6 | S   | 0.00000  | 0.00000  | 0.00000  | 1.94103  | 0.00000  |
| 87  | C6 | PX  | 0.00000  | 0.00000  | 0.00000  | 2.91116  | 0.00000  |
| 88  | C6 | PY  | 0.00000  | 0.00000  | 0.00000  | 2.38710  | 0.00000  |
| 89  | C6 | PZ  | 0.19009  | -0.23437 | 0.11718  | 0.00000  | 0.20531  |
| 90  | C6 | DXX | 0.00000  | 0.00000  | 0.00000  | -0.02017 | 0.00000  |
| 91  | C6 | DYY | 0.00000  | 0.00000  | 0.00000  | -0.11488 | 0.00000  |
| 92  | C6 | DZZ | 0.00000  | 0.00000  | 0.00000  | 0.05800  | 0.00000  |
| 93  | C6 | DXY | 0.00000  | 0.00000  | 0.00000  | 0.02438  | 0.00000  |
| 94  | C6 | DXZ | -0.04750 | -0.08304 | -0.33565 | 0.00000  | -0.06527 |
| 95  | C6 | DYZ | -0.20113 | 0.38902  | -0.04034 | 0.00000  | -0.12448 |
| 96  | C7 | S   | 0.00000  | 0.00000  | 0.00000  | 0.01508  | 0.00000  |
| 97  | C7 | S   | 0.00000  | 0.00000  | 0.00000  | 0.12410  | 0.00000  |
| 98  | C7 | PX  | 0.00000  | 0.00000  | 0.00000  | -0.01986 | 0.00000  |
| 99  | C7 | PY  | 0.00000  | 0.00000  | 0.00000  | -0.20481 | 0.00000  |
| 100 | C7 | PZ  | -0.00385 | -0.04932 | -0.03279 | 0.00000  | 0.06456  |
| 101 | C7 | S   | 0.00000  | 0.00000  | 0.00000  | -3.26782 | 0.00000  |
| 102 | C7 | PX  | 0.00000  | 0.00000  | 0.00000  | -0.30467 | 0.00000  |
| 103 | C7 | PY  | 0.00000  | 0.00000  | 0.00000  | -2.43614 | 0.00000  |
| 104 | C7 | PZ  | 0.04210  | 0.02234  | 0.00253  | 0.00000  | -0.10467 |
| 105 | C7 | DXX | 0.00000  | 0.00000  | 0.00000  | 0.03273  | 0.00000  |
| 106 | C7 | DYY | 0.00000  | 0.00000  | 0.00000  | -0.05899 | 0.00000  |
| 107 | C7 | DZZ | 0.00000  | 0.00000  | 0.00000  | 0.00418  | 0.00000  |
| 108 | C7 | DXY | 0.00000  | 0.00000  | 0.00000  | 0.05152  | 0.00000  |
| 109 | C7 | DXZ | 0.07121  | -0.14705 | -0.05723 | 0.00000  | 0.28102  |
| 110 | C7 | DYZ | 0.09275  | 0.00454  | 0.04467  | 0.00000  | 0.17154  |
| 111 | H3 | S   | 0.00000  | 0.00000  | 0.00000  | 0.52633  | 0.00000  |
| 112 | H3 | S   | 0.00000  | 0.00000  | 0.00000  | 0.93395  | 0.00000  |
| 113 | H3 | PX  | 0.00000  | 0.00000  | 0.00000  | 0.02609  | 0.00000  |
| 114 | H3 | PY  | 0.00000  | 0.00000  | 0.00000  | 0.02738  | 0.00000  |
| 115 | H3 | PZ  | -0.20349 | -0.02175 | 0.07109  | 0.00000  | 0.00757  |
| 116 | H4 | S   | 0.00000  | 0.00000  | 0.00000  | -0.52319 | 0.00000  |
| 117 | H4 | S   | 0.00000  | 0.00000  | 0.00000  | -0.97332 | 0.00000  |
| 118 | H4 | PX  | 0.00000  | 0.00000  | 0.00000  | 0.03694  | 0.00000  |
| 119 | H4 | PY  | 0.00000  | 0.00000  | 0.00000  | -0.02806 | 0.00000  |
| 120 | H4 | PZ  | 0.08027  | 0.18870  | 0.05172  | 0.00000  | 0.00870  |
| 121 | N1 | S   | 0.00000  | 0.00000  | 0.00000  | 0.02570  | 0.00000  |
| 122 | N1 | S   | 0.00000  | 0.00000  | 0.00000  | 0.53496  | 0.00000  |
| 123 | N1 | PX  | 0.00000  | 0.00000  | 0.00000  | 0.24219  | 0.00000  |
| 124 | N1 | PY  | 0.00000  | 0.00000  | 0.00000  | -0.03141 | 0.00000  |
| 125 | N1 | PZ  | -0.02838 | 0.09573  | -0.02963 | 0.00000  | -0.09685 |

|     |     |     |          |          |          |          |          |
|-----|-----|-----|----------|----------|----------|----------|----------|
| 126 | N1  | S   | 0.00000  | 0.00000  | 0.00000  | -1.03275 | 0.00000  |
| 127 | N1  | PX  | 0.00000  | 0.00000  | 0.00000  | -1.36071 | 0.00000  |
| 128 | N1  | PY  | 0.00000  | 0.00000  | 0.00000  | 1.87505  | 0.00000  |
| 129 | N1  | PZ  | -0.13507 | 0.09192  | -0.17085 | 0.00000  | -0.14473 |
| 130 | N1  | DXX | 0.00000  | 0.00000  | 0.00000  | 0.11647  | 0.00000  |
| 131 | N1  | DYY | 0.00000  | 0.00000  | 0.00000  | 0.10846  | 0.00000  |
| 132 | N1  | DZZ | 0.00000  | 0.00000  | 0.00000  | 0.00202  | 0.00000  |
| 133 | N1  | DXY | 0.00000  | 0.00000  | 0.00000  | 0.00885  | 0.00000  |
| 134 | N1  | DXZ | 0.11699  | -0.16583 | 0.11267  | 0.00000  | 0.34653  |
| 135 | N1  | DYZ | 0.08287  | -0.21007 | 0.12886  | 0.00000  | -0.05238 |
| 136 | H6  | S   | 0.00000  | 0.00000  | 0.00000  | 0.16673  | 0.00000  |
| 137 | H6  | S   | 0.00000  | 0.00000  | 0.00000  | 0.28139  | 0.00000  |
| 138 | H6  | PX  | 0.00000  | 0.00000  | 0.00000  | -0.01158 | 0.00000  |
| 139 | H6  | PY  | 0.00000  | 0.00000  | 0.00000  | 0.00123  | 0.00000  |
| 140 | H6  | PZ  | 0.17994  | -0.02468 | -0.12280 | 0.00000  | -0.00432 |
| 141 | C8  | S   | 0.00000  | 0.00000  | 0.00000  | -0.00204 | 0.00000  |
| 142 | C8  | S   | 0.00000  | 0.00000  | 0.00000  | -0.17247 | 0.00000  |
| 143 | C8  | PX  | 0.00000  | 0.00000  | 0.00000  | 0.13001  | 0.00000  |
| 144 | C8  | PY  | 0.00000  | 0.00000  | 0.00000  | 0.05338  | 0.00000  |
| 145 | C8  | PZ  | 0.00559  | -0.01512 | -0.01864 | 0.00000  | -0.02693 |
| 146 | C8  | S   | 0.00000  | 0.00000  | 0.00000  | 2.13005  | 0.00000  |
| 147 | C8  | PX  | 0.00000  | 0.00000  | 0.00000  | -2.81803 | 0.00000  |
| 148 | C8  | PY  | 0.00000  | 0.00000  | 0.00000  | -0.12328 | 0.00000  |
| 149 | C8  | PZ  | 0.01338  | 0.01420  | 0.18985  | 0.00000  | 0.18452  |
| 150 | C8  | DXX | 0.00000  | 0.00000  | 0.00000  | 0.03195  | 0.00000  |
| 151 | C8  | DYY | 0.00000  | 0.00000  | 0.00000  | 0.01777  | 0.00000  |
| 152 | C8  | DZZ | 0.00000  | 0.00000  | 0.00000  | -0.01522 | 0.00000  |
| 153 | C8  | DXY | 0.00000  | 0.00000  | 0.00000  | -0.06177 | 0.00000  |
| 154 | C8  | DXZ | -0.12675 | 0.07347  | -0.04130 | 0.00000  | -0.28764 |
| 155 | C8  | DYZ | -0.02792 | 0.07264  | 0.19323  | 0.00000  | 0.12181  |
| 156 | H8  | S   | 0.00000  | 0.00000  | 0.00000  | 0.17034  | 0.00000  |
| 157 | H8  | S   | 0.00000  | 0.00000  | 0.00000  | 0.03792  | 0.00000  |
| 158 | H8  | PX  | 0.00000  | 0.00000  | 0.00000  | -0.01419 | 0.00000  |
| 159 | H8  | PY  | 0.00000  | 0.00000  | 0.00000  | -0.03700 | 0.00000  |
| 160 | H8  | PZ  | 0.02629  | -0.07149 | -0.04780 | 0.00000  | 0.09909  |
| 161 | C10 | S   | 0.00000  | 0.00000  | 0.00000  | 0.01201  | 0.00000  |
| 162 | C10 | S   | 0.00000  | 0.00000  | 0.00000  | 0.08936  | 0.00000  |
| 163 | C10 | PX  | 0.00000  | 0.00000  | 0.00000  | 0.01742  | 0.00000  |
| 164 | C10 | PY  | 0.00000  | 0.00000  | 0.00000  | -0.06026 | 0.00000  |
| 165 | C10 | PZ  | -0.02580 | 0.04612  | 0.05719  | 0.00000  | 0.02630  |
| 166 | C10 | S   | 0.00000  | 0.00000  | 0.00000  | -1.07349 | 0.00000  |
| 167 | C10 | PX  | 0.00000  | 0.00000  | 0.00000  | 1.00817  | 0.00000  |
| 168 | C10 | PY  | 0.00000  | 0.00000  | 0.00000  | -0.51510 | 0.00000  |
| 169 | C10 | PZ  | 0.02478  | -0.05342 | -0.09662 | 0.00000  | -0.07295 |
| 170 | C10 | DXX | 0.00000  | 0.00000  | 0.00000  | 0.00928  | 0.00000  |
| 171 | C10 | DYY | 0.00000  | 0.00000  | 0.00000  | -0.03298 | 0.00000  |
| 172 | C10 | DZZ | 0.00000  | 0.00000  | 0.00000  | 0.01390  | 0.00000  |
| 173 | C10 | DXY | 0.00000  | 0.00000  | 0.00000  | 0.05278  | 0.00000  |
| 174 | C10 | DXZ | -0.19235 | 0.20254  | -0.33956 | 0.00000  | 0.45400  |
| 175 | C10 | DYZ | 0.06200  | -0.10906 | -0.14789 | 0.00000  | -0.12588 |
| 176 | H16 | S   | 0.00000  | 0.00000  | 0.00000  | -0.07752 | 0.00000  |
| 177 | H16 | S   | 0.00000  | 0.00000  | 0.00000  | -0.33391 | 0.00000  |
| 178 | H16 | PX  | 0.00000  | 0.00000  | 0.00000  | -0.01413 | 0.00000  |
| 179 | H16 | PY  | 0.00000  | 0.00000  | 0.00000  | 0.00651  | 0.00000  |

|     |     |    |          |          |          |          |          |
|-----|-----|----|----------|----------|----------|----------|----------|
| 180 | H16 | PZ | -0.09591 | 0.11699  | -0.11468 | 0.00000  | 0.27146  |
| 181 | H18 | S  | 0.00000  | 0.00000  | 0.00000  | 0.20173  | 0.00000  |
| 182 | H18 | S  | 0.00000  | 0.00000  | 0.00000  | 0.30292  | 0.00000  |
| 183 | H18 | PX | 0.00000  | 0.00000  | 0.00000  | -0.00734 | 0.00000  |
| 184 | H18 | PY | 0.00000  | 0.00000  | 0.00000  | -0.00620 | 0.00000  |
| 185 | H18 | PZ | 0.07312  | -0.07348 | 0.19352  | 0.00000  | -0.22480 |

|              |  |          |          |          |          |          |
|--------------|--|----------|----------|----------|----------|----------|
| MO:          |  | 111      | 112      | 113      | 114      | 115      |
| Eigenvalues: |  | 1.90008  | 1.98176  | 2.03536  | 2.08417  | 2.11203  |
| (ev):        |  | 51.70382 | 53.92646 | 55.38507 | 56.71307 | 57.47129 |

|    |    | A   | A        | A        | A        | A        |          |
|----|----|-----|----------|----------|----------|----------|----------|
| 1  | H1 | S   | 0.02940  | 0.17515  | 0.09118  | -0.11837 | 0.00000  |
| 2  | H1 | S   | 0.14438  | 0.08649  | 0.17843  | -0.63434 | 0.00000  |
| 3  | H1 | PX  | -0.00262 | 0.03372  | 0.03374  | -0.00606 | 0.00000  |
| 4  | H1 | PY  | -0.06170 | 0.05499  | -0.04336 | -0.01170 | 0.00000  |
| 5  | H1 | PZ  | 0.00000  | 0.00000  | 0.00000  | 0.00000  | -0.20587 |
| 6  | C1 | S   | -0.00964 | -0.00174 | -0.01986 | 0.03230  | 0.00000  |
| 7  | C1 | S   | -0.00433 | -0.11068 | -0.27589 | 0.56810  | 0.00000  |
| 8  | C1 | PX  | -0.01352 | 0.02930  | 0.03824  | -0.09780 | 0.00000  |
| 9  | C1 | PY  | -0.07302 | 0.14042  | -0.00328 | -0.17965 | 0.00000  |
| 10 | C1 | PZ  | 0.00000  | 0.00000  | 0.00000  | 0.00000  | -0.00250 |
| 11 | C1 | S   | 0.05080  | 0.14900  | 1.08214  | -1.85854 | 0.00000  |
| 12 | C1 | PX  | -0.37038 | -0.33056 | -0.81329 | 2.24590  | 0.00000  |
| 13 | C1 | PY  | 0.53350  | -0.14059 | -0.23857 | -0.87888 | 0.00000  |
| 14 | C1 | PZ  | 0.00000  | 0.00000  | 0.00000  | 0.00000  | 0.48008  |
| 15 | C1 | DXX | 0.01871  | -0.09201 | -0.00736 | -0.14035 | 0.00000  |
| 16 | C1 | DYY | -0.12964 | 0.07321  | 0.10109  | -0.04864 | 0.00000  |
| 17 | C1 | DZZ | 0.15966  | -0.00226 | -0.12691 | 0.12514  | 0.00000  |
| 18 | C1 | DXY | -0.17550 | 0.05258  | -0.09140 | -0.09792 | 0.00000  |
| 19 | C1 | DXZ | 0.00000  | 0.00000  | 0.00000  | 0.00000  | -0.34103 |
| 20 | C1 | DYZ | 0.00000  | 0.00000  | 0.00000  | 0.00000  | -0.42207 |
| 21 | C2 | S   | 0.00104  | 0.00416  | -0.02034 | -0.01253 | 0.00000  |
| 22 | C2 | S   | 0.31604  | -0.05888 | -0.19422 | -0.52261 | 0.00000  |
| 23 | C2 | PX  | 0.14188  | -0.04077 | -0.03856 | -0.20266 | 0.00000  |
| 24 | C2 | PY  | -0.26215 | 0.04597  | -0.05319 | 0.08971  | 0.00000  |
| 25 | C2 | PZ  | 0.00000  | 0.00000  | 0.00000  | 0.00000  | 0.01522  |
| 26 | C2 | S   | -0.09818 | 0.18751  | 1.08387  | 1.07143  | 0.00000  |
| 27 | C2 | PX  | -0.31860 | 1.26788  | -0.08509 | 2.22179  | 0.00000  |
| 28 | C2 | PY  | 0.18056  | 1.21552  | -0.93133 | 1.90685  | 0.00000  |
| 29 | C2 | PZ  | 0.00000  | 0.00000  | 0.00000  | 0.00000  | -0.14380 |
| 30 | C2 | DXX | -0.00630 | 0.04090  | -0.00894 | 0.12069  | 0.00000  |
| 31 | C2 | DYY | -0.10289 | 0.06570  | 0.06111  | -0.04176 | 0.00000  |
| 32 | C2 | DZZ | 0.15039  | -0.13318 | -0.09575 | -0.06630 | 0.00000  |
| 33 | C2 | DXY | 0.11501  | -0.15403 | 0.09875  | 0.12149  | 0.00000  |
| 34 | C2 | DXZ | 0.00000  | 0.00000  | 0.00000  | 0.00000  | -0.05656 |
| 35 | C2 | DYZ | 0.00000  | 0.00000  | 0.00000  | 0.00000  | 0.20281  |
| 36 | C3 | S   | 0.02047  | -0.01786 | 0.01937  | -0.07343 | 0.00000  |
| 37 | C3 | S   | 0.29296  | -0.28471 | 0.04949  | -0.91219 | 0.00000  |
| 38 | C3 | PX  | 0.11855  | 0.03057  | 0.17901  | 0.21764  | 0.00000  |
| 39 | C3 | PY  | -0.05758 | -0.12683 | 0.06107  | 0.12365  | 0.00000  |
| 40 | C3 | PZ  | 0.00000  | 0.00000  | 0.00000  | 0.00000  | -0.04555 |
| 41 | C3 | S   | -0.86425 | 3.39861  | -3.17790 | 9.96294  | 0.00000  |
| 42 | C3 | PX  | 0.54557  | -1.04434 | 0.70849  | -4.36380 | 0.00000  |



|    |    |     |          |          |          |          |          |
|----|----|-----|----------|----------|----------|----------|----------|
| 43 | C3 | PY  | 1.26861  | -0.06530 | -0.25172 | -3.25528 | 0.00000  |
| 44 | C3 | PZ  | 0.00000  | 0.00000  | 0.00000  | 0.00000  | -0.86932 |
| 45 | C3 | DXX | 0.11577  | 0.04921  | 0.31377  | 0.03545  | 0.00000  |
| 46 | C3 | DYY | -0.15884 | 0.02215  | -0.08473 | -0.03810 | 0.00000  |
| 47 | C3 | DZZ | 0.06128  | -0.12858 | -0.27590 | 0.15337  | 0.00000  |
| 48 | C3 | DXY | -0.29012 | 0.10117  | 0.05356  | 0.06636  | 0.00000  |
| 49 | C3 | DXZ | 0.00000  | 0.00000  | 0.00000  | 0.00000  | 0.01080  |
| 50 | C3 | DYZ | 0.00000  | 0.00000  | 0.00000  | 0.00000  | -0.01178 |
| 51 | C4 | S   | 0.00941  | 0.00724  | -0.00239 | -0.02620 | 0.00000  |
| 52 | C4 | S   | 0.24552  | 0.04898  | -0.08888 | -0.18904 | 0.00000  |
| 53 | C4 | PX  | -0.07291 | 0.04056  | -0.11248 | -0.12492 | 0.00000  |
| 54 | C4 | PY  | 0.00246  | -0.04635 | 0.08956  | -0.00635 | 0.00000  |
| 55 | C4 | PZ  | 0.00000  | 0.00000  | 0.00000  | 0.00000  | 0.04257  |
| 56 | C4 | S   | -1.32853 | -0.57112 | -0.11868 | 3.30968  | 0.00000  |
| 57 | C4 | PX  | 0.30213  | 0.27659  | 0.26037  | -0.28252 | 0.00000  |
| 58 | C4 | PY  | 0.69161  | 0.46734  | 0.23824  | -2.29405 | 0.00000  |
| 59 | C4 | PZ  | 0.00000  | 0.00000  | 0.00000  | 0.00000  | -0.13753 |
| 60 | C4 | DXX | -0.18743 | 0.10703  | 0.06213  | -0.17453 | 0.00000  |
| 61 | C4 | DYY | 0.04078  | -0.09526 | 0.05877  | 0.06554  | 0.00000  |
| 62 | C4 | DZZ | 0.15828  | -0.03441 | -0.18690 | 0.17716  | 0.00000  |
| 63 | C4 | DXY | -0.07492 | 0.00646  | -0.03837 | -0.13603 | 0.00000  |
| 64 | C4 | DXZ | 0.00000  | 0.00000  | 0.00000  | 0.00000  | -0.18362 |
| 65 | C4 | DYZ | 0.00000  | 0.00000  | 0.00000  | 0.00000  | 0.11799  |
| 66 | C5 | S   | -0.01443 | -0.00687 | -0.00064 | 0.02126  | 0.00000  |
| 67 | C5 | S   | -0.08980 | -0.22524 | 0.02461  | 0.40460  | 0.00000  |
| 68 | C5 | PX  | 0.09038  | -0.03561 | 0.04777  | 0.08157  | 0.00000  |
| 69 | C5 | PY  | 0.08041  | 0.06799  | -0.00656 | -0.00174 | 0.00000  |
| 70 | C5 | PZ  | 0.00000  | 0.00000  | 0.00000  | 0.00000  | -0.04190 |
| 71 | C5 | S   | 0.74432  | -0.54873 | 0.48183  | -3.72751 | 0.00000  |
| 72 | C5 | PX  | 0.50777  | 0.72587  | -0.45026 | -0.55515 | 0.00000  |
| 73 | C5 | PY  | -1.01402 | -0.07987 | 0.31318  | 2.07201  | 0.00000  |
| 74 | C5 | PZ  | 0.00000  | 0.00000  | 0.00000  | 0.00000  | 0.00538  |
| 75 | C5 | DXX | -0.19453 | 0.11786  | 0.05570  | -0.19663 | 0.00000  |
| 76 | C5 | DYY | 0.05276  | -0.10846 | 0.09304  | 0.09085  | 0.00000  |
| 77 | C5 | DZZ | 0.17750  | -0.01503 | -0.20972 | 0.07726  | 0.00000  |
| 78 | C5 | DXY | 0.03836  | -0.02432 | 0.02769  | 0.06622  | 0.00000  |
| 79 | C5 | DXZ | 0.00000  | 0.00000  | 0.00000  | 0.00000  | -0.11156 |
| 80 | C5 | DYZ | 0.00000  | 0.00000  | 0.00000  | 0.00000  | 0.03737  |
| 81 | C6 | S   | 0.00641  | 0.01221  | -0.00494 | 0.05276  | 0.00000  |
| 82 | C6 | S   | 0.16451  | -0.05527 | -0.35242 | 0.66161  | 0.00000  |
| 83 | C6 | PX  | -0.12965 | 0.20537  | -0.26857 | 0.09216  | 0.00000  |
| 84 | C6 | PY  | 0.08365  | -0.01071 | 0.10788  | -0.10468 | 0.00000  |
| 85 | C6 | PZ  | 0.00000  | 0.00000  | 0.00000  | 0.00000  | 0.01124  |
| 86 | C6 | S   | 2.85051  | 2.12872  | -0.86057 | -5.96872 | 0.00000  |
| 87 | C6 | PX  | 0.25890  | -3.05906 | 2.60886  | -5.17520 | 0.00000  |
| 88 | C6 | PY  | -2.70575 | -2.76494 | 0.66650  | 1.85488  | 0.00000  |
| 89 | C6 | PZ  | 0.00000  | 0.00000  | 0.00000  | 0.00000  | 0.49251  |
| 90 | C6 | DXX | 0.05860  | 0.07198  | 0.28074  | 0.04098  | 0.00000  |
| 91 | C6 | DYY | -0.05791 | 0.18555  | -0.13358 | 0.02239  | 0.00000  |
| 92 | C6 | DZZ | 0.01835  | -0.35302 | -0.18986 | -0.13657 | 0.00000  |
| 93 | C6 | DXY | 0.30495  | -0.04547 | 0.01114  | 0.03369  | 0.00000  |
| 94 | C6 | DXZ | 0.00000  | 0.00000  | 0.00000  | 0.00000  | 0.27417  |
| 95 | C6 | DYZ | 0.00000  | 0.00000  | 0.00000  | 0.00000  | 0.05174  |
| 96 | C7 | S   | 0.01005  | 0.01926  | -0.01921 | 0.05703  | 0.00000  |

|     |    |     |          |          |          |          |          |
|-----|----|-----|----------|----------|----------|----------|----------|
| 97  | C7 | S   | 0.01090  | 0.47443  | -0.49006 | 0.75172  | 0.00000  |
| 98  | C7 | PX  | -0.03988 | -0.01071 | 0.19701  | 0.00807  | 0.00000  |
| 99  | C7 | PY  | 0.08518  | 0.13521  | 0.04986  | 0.09658  | 0.00000  |
| 100 | C7 | PZ  | 0.00000  | 0.00000  | 0.00000  | 0.00000  | -0.02343 |
| 101 | C7 | S   | 0.12954  | -2.28228 | 1.77772  | -8.02278 | 0.00000  |
| 102 | C7 | PX  | 0.67999  | 2.26795  | -1.63238 | 4.65758  | 0.00000  |
| 103 | C7 | PY  | -0.39104 | -1.10446 | 0.28462  | -1.00422 | 0.00000  |
| 104 | C7 | PZ  | 0.00000  | 0.00000  | 0.00000  | 0.00000  | 0.61969  |
| 105 | C7 | DXX | -0.20204 | 0.06739  | 0.17453  | 0.13254  | 0.00000  |
| 106 | C7 | DYY | 0.12064  | 0.01751  | 0.01897  | -0.07171 | 0.00000  |
| 107 | C7 | DZZ | 0.06219  | -0.16725 | -0.18614 | -0.14434 | 0.00000  |
| 108 | C7 | DXY | 0.17287  | 0.05864  | 0.18950  | 0.15017  | 0.00000  |
| 109 | C7 | DXZ | 0.00000  | 0.00000  | 0.00000  | 0.00000  | -0.38225 |
| 110 | C7 | DYZ | 0.00000  | 0.00000  | 0.00000  | 0.00000  | 0.30305  |
| 111 | H3 | S   | -0.04368 | -0.00948 | -0.07350 | 0.24794  | 0.00000  |
| 112 | H3 | S   | -0.12650 | -0.19476 | -0.13505 | 0.50404  | 0.00000  |
| 113 | H3 | PX  | -0.04106 | 0.02859  | -0.01167 | -0.03247 | 0.00000  |
| 114 | H3 | PY  | 0.00068  | -0.00418 | -0.00478 | 0.07307  | 0.00000  |
| 115 | H3 | PZ  | 0.00000  | 0.00000  | 0.00000  | 0.00000  | 0.04617  |
| 116 | H4 | S   | 0.19260  | 0.16807  | -0.17943 | -0.11687 | 0.00000  |
| 117 | H4 | S   | 0.38859  | 0.16689  | -0.23586 | -0.42992 | 0.00000  |
| 118 | H4 | PX  | 0.02671  | -0.02945 | 0.01889  | 0.09042  | 0.00000  |
| 119 | H4 | PY  | 0.03072  | 0.01270  | -0.01598 | 0.02221  | 0.00000  |
| 120 | H4 | PZ  | 0.00000  | 0.00000  | 0.00000  | 0.00000  | 0.05559  |
| 121 | N1 | S   | 0.08565  | 0.08910  | -0.04621 | -0.04225 | 0.00000  |
| 122 | N1 | S   | 0.98045  | 1.33558  | -0.55708 | -0.43248 | 0.00000  |
| 123 | N1 | PX  | 0.03760  | -0.07378 | 0.06332  | 0.03438  | 0.00000  |
| 124 | N1 | PY  | -0.04858 | 0.09316  | -0.02610 | 0.06970  | 0.00000  |
| 125 | N1 | PZ  | 0.00000  | 0.00000  | 0.00000  | 0.00000  | 0.03591  |
| 126 | N1 | S   | -5.81602 | -7.33317 | 2.92395  | 2.48490  | 0.00000  |
| 127 | N1 | PX  | -1.75552 | -1.30076 | 0.23340  | 1.17707  | 0.00000  |
| 128 | N1 | PY  | -0.87967 | -1.51130 | 1.08315  | -1.01133 | 0.00000  |
| 129 | N1 | PZ  | 0.00000  | 0.00000  | 0.00000  | 0.00000  | -0.05002 |
| 130 | N1 | DXX | -0.04603 | 0.30220  | -0.21267 | -0.12999 | 0.00000  |
| 131 | N1 | DYY | 0.29136  | 0.29127  | 0.05850  | -0.02646 | 0.00000  |
| 132 | N1 | DZZ | 0.08141  | -0.22812 | -0.05749 | 0.03002  | 0.00000  |
| 133 | N1 | DXY | -0.14204 | -0.00832 | -0.18790 | 0.11850  | 0.00000  |
| 134 | N1 | DXZ | 0.00000  | 0.00000  | 0.00000  | 0.00000  | 0.03257  |
| 135 | N1 | DYZ | 0.00000  | 0.00000  | 0.00000  | 0.00000  | -0.25047 |
| 136 | H6 | S   | -0.04391 | 0.28008  | -0.09966 | 0.20662  | 0.00000  |
| 137 | H6 | S   | -0.09299 | 0.40225  | -0.10725 | 0.70521  | 0.00000  |
| 138 | H6 | PX  | 0.01467  | -0.03041 | -0.00295 | 0.01343  | 0.00000  |
| 139 | H6 | PY  | -0.04319 | 0.09854  | -0.04830 | 0.02880  | 0.00000  |
| 140 | H6 | PZ  | 0.00000  | 0.00000  | 0.00000  | 0.00000  | 0.01216  |
| 141 | C8 | S   | 0.01535  | -0.02285 | 0.01501  | -0.02609 | 0.00000  |
| 142 | C8 | S   | 0.10185  | -0.45272 | -0.08201 | -0.66084 | 0.00000  |
| 143 | C8 | PX  | -0.06922 | 0.09851  | -0.07294 | -0.11374 | 0.00000  |
| 144 | C8 | PY  | -0.11535 | -0.08615 | -0.15752 | -0.19249 | 0.00000  |
| 145 | C8 | PZ  | 0.00000  | 0.00000  | 0.00000  | 0.00000  | -0.02083 |
| 146 | C8 | S   | 0.10001  | 2.77681  | -1.03706 | 2.03453  | 0.00000  |
| 147 | C8 | PX  | -0.94532 | -0.92407 | -0.19404 | 4.09555  | 0.00000  |
| 148 | C8 | PY  | 3.32076  | 2.86887  | -1.47792 | 3.46765  | 0.00000  |
| 149 | C8 | PZ  | 0.00000  | 0.00000  | 0.00000  | 0.00000  | -0.42237 |
| 150 | C8 | DXX | 0.16161  | 0.06673  | 0.29160  | -0.10719 | 0.00000  |

|     |     |     |          |          |          |          |          |
|-----|-----|-----|----------|----------|----------|----------|----------|
| 151 | C8  | DYY | -0.20008 | 0.08788  | -0.03692 | 0.03962  | 0.00000  |
| 152 | C8  | DZZ | 0.01833  | -0.18769 | -0.34929 | 0.06499  | 0.00000  |
| 153 | C8  | DXY | -0.04592 | 0.00779  | 0.06997  | 0.27434  | 0.00000  |
| 154 | C8  | DXZ | 0.00000  | 0.00000  | 0.00000  | 0.00000  | -0.14863 |
| 155 | C8  | DYZ | 0.00000  | 0.00000  | 0.00000  | 0.00000  | -0.05066 |
| 156 | H8  | S   | 0.09455  | -0.36557 | 0.13298  | -0.28014 | 0.00000  |
| 157 | H8  | S   | -0.40104 | -0.70190 | 0.47527  | -1.06420 | 0.00000  |
| 158 | H8  | PX  | 0.04276  | -0.03650 | 0.07849  | -0.02903 | 0.00000  |
| 159 | H8  | PY  | -0.01062 | 0.06425  | 0.11473  | 0.13709  | 0.00000  |
| 160 | H8  | PZ  | 0.00000  | 0.00000  | 0.00000  | 0.00000  | -0.27918 |
| 161 | C10 | S   | -0.01241 | -0.00095 | -0.01290 | -0.00471 | 0.00000  |
| 162 | C10 | S   | 0.07102  | 0.10602  | -0.11128 | 0.06733  | 0.00000  |
| 163 | C10 | PX  | 0.01299  | -0.00068 | 0.02936  | 0.08789  | 0.00000  |
| 164 | C10 | PY  | 0.25246  | 0.05011  | -0.06122 | 0.11549  | 0.00000  |
| 165 | C10 | PZ  | 0.00000  | 0.00000  | 0.00000  | 0.00000  | -0.00791 |
| 166 | C10 | S   | 2.37426  | 1.10527  | -0.50446 | 2.08001  | 0.00000  |
| 167 | C10 | PX  | 0.65192  | 0.70007  | -0.12220 | -1.78037 | 0.00000  |
| 168 | C10 | PY  | 0.83228  | 0.24483  | -0.38357 | 0.96561  | 0.00000  |
| 169 | C10 | PZ  | 0.00000  | 0.00000  | 0.00000  | 0.00000  | 0.18896  |
| 170 | C10 | DXX | -0.03570 | -0.01033 | 0.19438  | -0.12890 | 0.00000  |
| 171 | C10 | DYY | -0.01321 | 0.03734  | -0.00492 | 0.10434  | 0.00000  |
| 172 | C10 | DZZ | 0.10981  | -0.08323 | -0.23412 | 0.02024  | 0.00000  |
| 173 | C10 | DXY | 0.02910  | 0.02025  | -0.07416 | -0.15968 | 0.00000  |
| 174 | C10 | DXZ | 0.00000  | 0.00000  | 0.00000  | 0.00000  | 0.00696  |
| 175 | C10 | DYZ | 0.00000  | 0.00000  | 0.00000  | 0.00000  | 0.23782  |
| 176 | H16 | S   | -0.13800 | -0.11387 | -0.16503 | 0.19646  | 0.00000  |
| 177 | H16 | S   | -0.15476 | -0.25671 | 0.01037  | 0.61402  | 0.00000  |
| 178 | H16 | PX  | 0.01717  | -0.03017 | -0.02351 | -0.02358 | 0.00000  |
| 179 | H16 | PY  | 0.00567  | -0.01681 | 0.06458  | -0.01869 | 0.00000  |
| 180 | H16 | PZ  | 0.00000  | 0.00000  | 0.00000  | 0.00000  | -0.05896 |
| 181 | H18 | S   | 0.07762  | 0.12394  | -0.11414 | -0.12835 | 0.00000  |
| 182 | H18 | S   | 0.15755  | 0.15685  | -0.09919 | -0.60281 | 0.00000  |
| 183 | H18 | PX  | -0.02789 | 0.00455  | -0.01022 | -0.00583 | 0.00000  |
| 184 | H18 | PY  | 0.01250  | -0.02413 | 0.05826  | -0.09602 | 0.00000  |
| 185 | H18 | PZ  | 0.00000  | 0.00000  | 0.00000  | 0.00000  | -0.07617 |

|              |          |          |          |          |          |
|--------------|----------|----------|----------|----------|----------|
| MO:          | 116      | 117      | 118      | 119      | 120      |
| Eigenvalues: | 2.12691  | 2.14240  | 2.15746  | 2.17372  | 2.19360  |
| (ev):        | 57.87625 | 58.29774 | 58.70737 | 59.15008 | 59.69093 |

|    |    |    |          |          |          |          |          |
|----|----|----|----------|----------|----------|----------|----------|
|    |    | A  | A        | A        | A        | A        |          |
| 1  | H1 | S  | 0.01742  | 0.37347  | -0.09247 | 0.29242  | 0.00000  |
| 2  | H1 | S  | 0.18940  | -0.07792 | -0.20469 | 0.31275  | 0.00000  |
| 3  | H1 | PX | -0.03467 | 0.13368  | -0.03003 | 0.04406  | 0.00000  |
| 4  | H1 | PY | 0.00609  | 0.06497  | 0.10831  | 0.10359  | 0.00000  |
| 5  | H1 | PZ | 0.00000  | 0.00000  | 0.00000  | 0.00000  | 0.09428  |
| 6  | C1 | S  | -0.00392 | 0.01150  | 0.00565  | 0.00135  | 0.00000  |
| 7  | C1 | S  | -0.34964 | -0.01618 | 0.20186  | -0.25968 | 0.00000  |
| 8  | C1 | PX | 0.19154  | -0.01397 | -0.05269 | 0.09260  | 0.00000  |
| 9  | C1 | PY | 0.01746  | -0.00701 | 0.02009  | 0.25208  | 0.00000  |
| 10 | C1 | PZ | 0.00000  | 0.00000  | 0.00000  | 0.00000  | -0.02419 |
| 11 | C1 | S  | 0.53132  | -0.60716 | -0.31334 | -0.22156 | 0.00000  |
| 12 | C1 | PX | -0.68750 | -0.01928 | 0.73971  | -1.04841 | 0.00000  |
| 13 | C1 | PY | 0.24403  | 0.23005  | -0.82891 | 0.16925  | 0.00000  |

|    |    |     |          |          |          |          |          |
|----|----|-----|----------|----------|----------|----------|----------|
| 14 | C1 | PZ  | 0.00000  | 0.00000  | 0.00000  | 0.00000  | -0.08162 |
| 15 | C1 | DXX | 0.06965  | -0.35439 | 0.00966  | -0.12429 | 0.00000  |
| 16 | C1 | DYY | -0.01586 | 0.31288  | 0.00692  | 0.11781  | 0.00000  |
| 17 | C1 | DZZ | -0.13378 | 0.07588  | -0.03529 | 0.02712  | 0.00000  |
| 18 | C1 | DXY | -0.14694 | 0.01810  | 0.24457  | 0.06518  | 0.00000  |
| 19 | C1 | DXZ | 0.00000  | 0.00000  | 0.00000  | 0.00000  | 0.11538  |
| 20 | C1 | DYZ | 0.00000  | 0.00000  | 0.00000  | 0.00000  | -0.11178 |
| 21 | C2 | S   | 0.00809  | 0.00334  | -0.02382 | 0.00701  | 0.00000  |
| 22 | C2 | S   | 0.00262  | 0.11543  | -0.16572 | 0.28736  | 0.00000  |
| 23 | C2 | PX  | -0.09164 | 0.09868  | -0.00023 | 0.05482  | 0.00000  |
| 24 | C2 | PY  | -0.07320 | -0.15851 | 0.01481  | -0.07285 | 0.00000  |
| 25 | C2 | PZ  | 0.00000  | 0.00000  | 0.00000  | 0.00000  | -0.03733 |
| 26 | C2 | S   | -0.61206 | 0.05872  | 1.50775  | -0.44557 | 0.00000  |
| 27 | C2 | PX  | -0.19343 | -0.36001 | 1.35445  | -1.35181 | 0.00000  |
| 28 | C2 | PY  | -0.01794 | 0.21352  | 0.68190  | -0.64507 | 0.00000  |
| 29 | C2 | PZ  | 0.00000  | 0.00000  | 0.00000  | 0.00000  | -0.41519 |
| 30 | C2 | DXX | -0.03482 | -0.19342 | 0.20738  | 0.29325  | 0.00000  |
| 31 | C2 | DYY | 0.00613  | 0.11341  | -0.17369 | -0.28698 | 0.00000  |
| 32 | C2 | DZZ | -0.06660 | 0.12154  | 0.00876  | -0.05484 | 0.00000  |
| 33 | C2 | DXY | 0.21095  | 0.10497  | 0.08876  | 0.05256  | 0.00000  |
| 34 | C2 | DXZ | 0.00000  | 0.00000  | 0.00000  | 0.00000  | -0.35859 |
| 35 | C2 | DYZ | 0.00000  | 0.00000  | 0.00000  | 0.00000  | 0.33951  |
| 36 | C3 | S   | 0.00549  | 0.01924  | -0.02721 | 0.02585  | 0.00000  |
| 37 | C3 | S   | 0.03617  | -0.23226 | -0.72101 | 0.52035  | 0.00000  |
| 38 | C3 | PX  | 0.13170  | 0.05421  | 0.10131  | -0.12823 | 0.00000  |
| 39 | C3 | PY  | 0.05849  | -0.19197 | 0.13671  | -0.27018 | 0.00000  |
| 40 | C3 | PZ  | 0.00000  | 0.00000  | 0.00000  | 0.00000  | 0.00471  |
| 41 | C3 | S   | -1.70075 | 0.22412  | 4.65998  | -3.85308 | 0.00000  |
| 42 | C3 | PX  | 0.33738  | 0.32058  | -1.99998 | 2.21387  | 0.00000  |
| 43 | C3 | PY  | 0.87950  | 0.50120  | -2.12411 | 1.95329  | 0.00000  |
| 44 | C3 | PZ  | 0.00000  | 0.00000  | 0.00000  | 0.00000  | -0.17669 |
| 45 | C3 | DXX | 0.07780  | 0.09961  | -0.12605 | -0.07378 | 0.00000  |
| 46 | C3 | DYY | 0.01852  | -0.09379 | 0.14237  | 0.00388  | 0.00000  |
| 47 | C3 | DZZ | -0.14383 | 0.00554  | -0.07304 | 0.05103  | 0.00000  |
| 48 | C3 | DXY | 0.10554  | 0.22235  | -0.01445 | 0.31070  | 0.00000  |
| 49 | C3 | DXZ | 0.00000  | 0.00000  | 0.00000  | 0.00000  | 0.32473  |
| 50 | C3 | DYZ | 0.00000  | 0.00000  | 0.00000  | 0.00000  | -0.01075 |
| 51 | C4 | S   | -0.00215 | 0.00942  | -0.01884 | 0.00609  | 0.00000  |
| 52 | C4 | S   | 0.26979  | -0.13377 | -0.07337 | 0.24136  | 0.00000  |
| 53 | C4 | PX  | -0.19624 | 0.00820  | -0.01559 | -0.17416 | 0.00000  |
| 54 | C4 | PY  | -0.01472 | 0.03865  | -0.05672 | 0.01216  | 0.00000  |
| 55 | C4 | PZ  | 0.00000  | 0.00000  | 0.00000  | 0.00000  | 0.04163  |
| 56 | C4 | S   | -0.88120 | -0.14615 | 1.70744  | -1.39878 | 0.00000  |
| 57 | C4 | PX  | 0.52862  | -0.18729 | -0.29038 | 0.71316  | 0.00000  |
| 58 | C4 | PY  | 0.66899  | -0.34480 | -0.99117 | 0.70104  | 0.00000  |
| 59 | C4 | PZ  | 0.00000  | 0.00000  | 0.00000  | 0.00000  | 0.12790  |
| 60 | C4 | DXX | -0.24795 | 0.21109  | 0.08239  | -0.05258 | 0.00000  |
| 61 | C4 | DYY | 0.20173  | -0.27708 | -0.04925 | -0.00101 | 0.00000  |
| 62 | C4 | DZZ | 0.02491  | 0.10343  | 0.02468  | 0.05312  | 0.00000  |
| 63 | C4 | DXY | -0.17754 | -0.22174 | 0.16447  | 0.03740  | 0.00000  |
| 64 | C4 | DXZ | 0.00000  | 0.00000  | 0.00000  | 0.00000  | -0.06279 |
| 65 | C4 | DYZ | 0.00000  | 0.00000  | 0.00000  | 0.00000  | -0.14790 |
| 66 | C5 | S   | -0.01365 | 0.01465  | 0.01280  | -0.01362 | 0.00000  |
| 67 | C5 | S   | 0.00029  | -0.14755 | 0.15365  | -0.09149 | 0.00000  |

|     |    |     |          |          |          |          |          |
|-----|----|-----|----------|----------|----------|----------|----------|
| 68  | C5 | PX  | 0.21848  | -0.12767 | -0.06284 | -0.09110 | 0.00000  |
| 69  | C5 | PY  | 0.08497  | 0.02004  | -0.00301 | -0.05660 | 0.00000  |
| 70  | C5 | PZ  | 0.00000  | 0.00000  | 0.00000  | 0.00000  | -0.02301 |
| 71  | C5 | S   | 0.83877  | -0.09947 | -2.02405 | 1.93913  | 0.00000  |
| 72  | C5 | PX  | -0.20808 | 0.33478  | -0.34585 | 0.39091  | 0.00000  |
| 73  | C5 | PY  | -0.67340 | -0.08526 | 1.38500  | -0.64102 | 0.00000  |
| 74  | C5 | PZ  | 0.00000  | 0.00000  | 0.00000  | 0.00000  | 0.09400  |
| 75  | C5 | DXX | -0.30394 | 0.09110  | -0.02763 | -0.15004 | 0.00000  |
| 76  | C5 | DYY | 0.23227  | -0.13397 | 0.06291  | 0.21799  | 0.00000  |
| 77  | C5 | DZZ | 0.06641  | 0.04671  | -0.11173 | -0.04758 | 0.00000  |
| 78  | C5 | DXY | 0.15316  | 0.21340  | -0.18267 | -0.18986 | 0.00000  |
| 79  | C5 | DXZ | 0.00000  | 0.00000  | 0.00000  | 0.00000  | -0.21854 |
| 80  | C5 | DYZ | 0.00000  | 0.00000  | 0.00000  | 0.00000  | -0.15366 |
| 81  | C6 | S   | -0.02569 | 0.01226  | 0.01697  | -0.02591 | 0.00000  |
| 82  | C6 | S   | -0.22715 | -0.00046 | 0.58067  | -0.08186 | 0.00000  |
| 83  | C6 | PX  | -0.07954 | -0.06033 | 0.09739  | -0.06689 | 0.00000  |
| 84  | C6 | PY  | 0.13930  | -0.05374 | 0.00043  | 0.15677  | 0.00000  |
| 85  | C6 | PZ  | 0.00000  | 0.00000  | 0.00000  | 0.00000  | 0.10351  |
| 86  | C6 | S   | 1.46429  | 0.41810  | -3.13650 | 2.99920  | 0.00000  |
| 87  | C6 | PX  | 0.51505  | 0.55360  | -2.09176 | 2.20825  | 0.00000  |
| 88  | C6 | PY  | -0.66660 | 0.00133  | 0.02878  | -0.92970 | 0.00000  |
| 89  | C6 | PZ  | 0.00000  | 0.00000  | 0.00000  | 0.00000  | 0.57872  |
| 90  | C6 | DXX | 0.20101  | 0.15533  | 0.06372  | -0.17317 | 0.00000  |
| 91  | C6 | DYY | -0.04649 | -0.18000 | -0.00689 | 0.05773  | 0.00000  |
| 92  | C6 | DZZ | -0.08499 | 0.07934  | -0.10524 | 0.16222  | 0.00000  |
| 93  | C6 | DXY | -0.08923 | 0.05645  | 0.23303  | 0.12527  | 0.00000  |
| 94  | C6 | DXZ | 0.00000  | 0.00000  | 0.00000  | 0.00000  | -0.04558 |
| 95  | C6 | DYZ | 0.00000  | 0.00000  | 0.00000  | 0.00000  | 0.21656  |
| 96  | C7 | S   | -0.02361 | 0.00750  | 0.02363  | -0.00900 | 0.00000  |
| 97  | C7 | S   | 0.10695  | 0.24025  | 0.45916  | -0.21567 | 0.00000  |
| 98  | C7 | PX  | -0.18484 | -0.09256 | -0.00107 | 0.12410  | 0.00000  |
| 99  | C7 | PY  | -0.08839 | 0.12970  | -0.02281 | 0.17401  | 0.00000  |
| 100 | C7 | PZ  | 0.00000  | 0.00000  | 0.00000  | 0.00000  | -0.01998 |
| 101 | C7 | S   | 1.97028  | -0.50443 | -4.71436 | 2.72149  | 0.00000  |
| 102 | C7 | PX  | -0.73801 | 0.40136  | 2.69082  | -1.57631 | 0.00000  |
| 103 | C7 | PY  | 0.56671  | -0.16564 | -0.49673 | -0.00121 | 0.00000  |
| 104 | C7 | PZ  | 0.00000  | 0.00000  | 0.00000  | 0.00000  | -0.12679 |
| 105 | C7 | DXX | 0.08599  | 0.03052  | -0.12921 | 0.28603  | 0.00000  |
| 106 | C7 | DYY | -0.08552 | -0.12816 | 0.12686  | -0.26589 | 0.00000  |
| 107 | C7 | DZZ | 0.03514  | 0.18140  | -0.09698 | -0.00351 | 0.00000  |
| 108 | C7 | DXY | -0.22330 | -0.06705 | -0.13979 | -0.13720 | 0.00000  |
| 109 | C7 | DXZ | 0.00000  | 0.00000  | 0.00000  | 0.00000  | 0.18491  |
| 110 | C7 | DYZ | 0.00000  | 0.00000  | 0.00000  | 0.00000  | 0.16215  |
| 111 | H3 | S   | -0.09472 | 0.38468  | 0.02067  | -0.07433 | 0.00000  |
| 112 | H3 | S   | -0.21243 | 0.05024  | 0.25429  | -0.21186 | 0.00000  |
| 113 | H3 | PX  | -0.13832 | 0.09029  | 0.04982  | -0.02045 | 0.00000  |
| 114 | H3 | PY  | 0.05205  | 0.11025  | -0.02312 | -0.00323 | 0.00000  |
| 115 | H3 | PZ  | 0.00000  | 0.00000  | 0.00000  | 0.00000  | -0.13255 |
| 116 | H4 | S   | 0.04142  | 0.24406  | -0.28383 | -0.24050 | 0.00000  |
| 117 | H4 | S   | 0.10287  | 0.02521  | -0.28650 | 0.21856  | 0.00000  |
| 118 | H4 | PX  | 0.12114  | -0.06326 | 0.04123  | 0.07270  | 0.00000  |
| 119 | H4 | PY  | 0.07923  | 0.06054  | -0.09531 | -0.06614 | 0.00000  |
| 120 | H4 | PZ  | 0.00000  | 0.00000  | 0.00000  | 0.00000  | -0.05147 |
| 121 | N1 | S   | 0.00474  | -0.00093 | 0.00161  | 0.01045  | 0.00000  |

|     |     |     |          |          |          |          |          |
|-----|-----|-----|----------|----------|----------|----------|----------|
| 122 | N1  | S   | 0.07112  | 0.01978  | -0.30916 | 0.40169  | 0.00000  |
| 123 | N1  | PX  | -0.05743 | 0.11547  | -0.15979 | 0.15101  | 0.00000  |
| 124 | N1  | PY  | 0.04102  | 0.06542  | 0.08349  | -0.15864 | 0.00000  |
| 125 | N1  | PZ  | 0.00000  | 0.00000  | 0.00000  | 0.00000  | 0.15189  |
| 126 | N1  | S   | -0.45473 | 0.15445  | 0.48504  | -1.52365 | 0.00000  |
| 127 | N1  | PX  | 0.13288  | -0.22824 | 0.29990  | -0.80015 | 0.00000  |
| 128 | N1  | PY  | 0.01921  | -0.12321 | -0.66607 | 0.28769  | 0.00000  |
| 129 | N1  | PZ  | 0.00000  | 0.00000  | 0.00000  | 0.00000  | -0.44759 |
| 130 | N1  | DXX | 0.28086  | -0.17430 | -0.23286 | -0.15730 | 0.00000  |
| 131 | N1  | DYY | -0.09721 | 0.03841  | 0.17851  | 0.14846  | 0.00000  |
| 132 | N1  | DZZ | -0.16499 | 0.16304  | -0.08410 | 0.05459  | 0.00000  |
| 133 | N1  | DXY | -0.02420 | -0.15196 | -0.20310 | -0.05340 | 0.00000  |
| 134 | N1  | DXZ | 0.00000  | 0.00000  | 0.00000  | 0.00000  | -0.43058 |
| 135 | N1  | DYZ | 0.00000  | 0.00000  | 0.00000  | 0.00000  | -0.22091 |
| 136 | H6  | S   | 0.00199  | 0.10496  | -0.04035 | -0.47999 | 0.00000  |
| 137 | H6  | S   | -0.00285 | -0.18365 | 0.42424  | -0.33064 | 0.00000  |
| 138 | H6  | PX  | 0.01860  | -0.06978 | 0.04534  | 0.14305  | 0.00000  |
| 139 | H6  | PY  | -0.03033 | -0.06997 | -0.03733 | -0.04902 | 0.00000  |
| 140 | H6  | PZ  | 0.00000  | 0.00000  | 0.00000  | 0.00000  | 0.24823  |
| 141 | C8  | S   | -0.00714 | 0.01099  | -0.01823 | 0.00744  | 0.00000  |
| 142 | C8  | S   | -0.06164 | 0.13374  | -0.20046 | 0.19464  | 0.00000  |
| 143 | C8  | PX  | 0.12178  | -0.00514 | 0.05004  | 0.01403  | 0.00000  |
| 144 | C8  | PY  | 0.13915  | 0.03853  | -0.12630 | 0.11751  | 0.00000  |
| 145 | C8  | PZ  | 0.00000  | 0.00000  | 0.00000  | 0.00000  | 0.07447  |
| 146 | C8  | S   | 0.29629  | -0.11715 | 1.06627  | -0.59982 | 0.00000  |
| 147 | C8  | PX  | -0.85610 | 0.45738  | 2.01684  | -1.19381 | 0.00000  |
| 148 | C8  | PY  | -2.12853 | 0.47560  | 2.47951  | -0.63981 | 0.00000  |
| 149 | C8  | PZ  | 0.00000  | 0.00000  | 0.00000  | 0.00000  | 0.40387  |
| 150 | C8  | DXX | -0.23275 | -0.07741 | 0.12867  | -0.04417 | 0.00000  |
| 151 | C8  | DYY | 0.27722  | -0.07699 | -0.08607 | 0.03066  | 0.00000  |
| 152 | C8  | DZZ | -0.09188 | 0.18503  | -0.04986 | -0.00091 | 0.00000  |
| 153 | C8  | DXY | -0.24071 | -0.09728 | -0.24121 | 0.12990  | 0.00000  |
| 154 | C8  | DXZ | 0.00000  | 0.00000  | 0.00000  | 0.00000  | 0.05491  |
| 155 | C8  | DYZ | 0.00000  | 0.00000  | 0.00000  | 0.00000  | -0.03811 |
| 156 | H8  | S   | -0.14094 | -0.08344 | -0.14053 | -0.20652 | 0.00000  |
| 157 | H8  | S   | 0.24746  | -0.08957 | -0.57794 | 0.43288  | 0.00000  |
| 158 | H8  | PX  | -0.04384 | 0.00679  | -0.08487 | -0.04970 | 0.00000  |
| 159 | H8  | PY  | -0.04813 | 0.03092  | -0.09448 | 0.13107  | 0.00000  |
| 160 | H8  | PZ  | 0.00000  | 0.00000  | 0.00000  | 0.00000  | 0.04619  |
| 161 | C10 | S   | 0.00366  | 0.00628  | -0.00850 | 0.00049  | 0.00000  |
| 162 | C10 | S   | -0.14074 | 0.08254  | 0.07620  | -0.00922 | 0.00000  |
| 163 | C10 | PX  | -0.07439 | -0.00217 | -0.00904 | 0.00850  | 0.00000  |
| 164 | C10 | PY  | -0.23805 | 0.09220  | 0.16679  | -0.01835 | 0.00000  |
| 165 | C10 | PZ  | 0.00000  | 0.00000  | 0.00000  | 0.00000  | -0.01075 |
| 166 | C10 | S   | -1.57266 | 0.27345  | 1.63386  | -0.34240 | 0.00000  |
| 167 | C10 | PX  | 0.25312  | -0.37596 | -1.12029 | 0.50723  | 0.00000  |
| 168 | C10 | PY  | -0.46002 | 0.16464  | 0.54687  | -0.14582 | 0.00000  |
| 169 | C10 | PZ  | 0.00000  | 0.00000  | 0.00000  | 0.00000  | -0.23190 |
| 170 | C10 | DXX | -0.05174 | -0.06585 | 0.10315  | -0.05855 | 0.00000  |
| 171 | C10 | DYY | 0.08432  | -0.03125 | -0.06578 | 0.05044  | 0.00000  |
| 172 | C10 | DZZ | -0.11644 | 0.15902  | -0.01586 | -0.01150 | 0.00000  |
| 173 | C10 | DXY | 0.22905  | 0.10977  | 0.24681  | -0.08766 | 0.00000  |
| 174 | C10 | DXZ | 0.00000  | 0.00000  | 0.00000  | 0.00000  | -0.03228 |
| 175 | C10 | DYZ | 0.00000  | 0.00000  | 0.00000  | 0.00000  | -0.32286 |

|     |     |    |          |          |          |          |         |
|-----|-----|----|----------|----------|----------|----------|---------|
| 176 | H16 | S  | 0.19392  | 0.20750  | 0.31019  | -0.10703 | 0.00000 |
| 177 | H16 | S  | -0.16299 | 0.08095  | 0.25155  | -0.16122 | 0.00000 |
| 178 | H16 | PX | 0.02709  | 0.05969  | 0.15239  | -0.08540 | 0.00000 |
| 179 | H16 | PY | -0.07881 | -0.02510 | 0.04458  | -0.04363 | 0.00000 |
| 180 | H16 | PZ | 0.00000  | 0.00000  | 0.00000  | 0.00000  | 0.09074 |
| 181 | H18 | S  | -0.05963 | -0.08658 | -0.45216 | 0.17999  | 0.00000 |
| 182 | H18 | S  | 0.16481  | -0.09134 | -0.28434 | 0.09645  | 0.00000 |
| 183 | H18 | PX | 0.10118  | 0.03001  | 0.12667  | -0.05950 | 0.00000 |
| 184 | H18 | PY | -0.04532 | -0.01909 | -0.00296 | 0.00718  | 0.00000 |
| 185 | H18 | PZ | 0.00000  | 0.00000  | 0.00000  | 0.00000  | 0.13287 |

|              |          |          |          |          |          |
|--------------|----------|----------|----------|----------|----------|
| MO:          | 121      | 122      | 123      | 124      | 125      |
| Eigenvalues: | 2.24660  | 2.27302  | 2.27957  | 2.28758  | 2.30563  |
| (ev):        | 61.13308 | 61.85196 | 62.03024 | 62.24833 | 62.73932 |

|    |    | A   | A        | A        | A        | A        |          |
|----|----|-----|----------|----------|----------|----------|----------|
| 1  | H1 | S   | -0.04482 | 0.00000  | 0.00000  | -0.31917 | -0.17840 |
| 2  | H1 | S   | 0.05061  | 0.00000  | 0.00000  | -0.04154 | 0.00015  |
| 3  | H1 | PX  | 0.00427  | 0.00000  | 0.00000  | -0.11732 | -0.10293 |
| 4  | H1 | PY  | -0.08468 | 0.00000  | 0.00000  | 0.17058  | -0.03839 |
| 5  | H1 | PZ  | 0.00000  | 0.14686  | -0.28243 | 0.00000  | 0.00000  |
| 6  | C1 | S   | -0.01796 | 0.00000  | 0.00000  | -0.01003 | -0.00436 |
| 7  | C1 | S   | 0.05068  | 0.00000  | 0.00000  | -0.19661 | -0.09140 |
| 8  | C1 | PX  | -0.07968 | 0.00000  | 0.00000  | 0.04517  | 0.07037  |
| 9  | C1 | PY  | 0.00017  | 0.00000  | 0.00000  | 0.03658  | 0.11544  |
| 10 | C1 | PZ  | 0.00000  | 0.02669  | 0.05752  | 0.00000  | 0.00000  |
| 11 | C1 | S   | 0.90026  | 0.00000  | 0.00000  | 0.88039  | -0.64083 |
| 12 | C1 | PX  | -0.23012 | 0.00000  | 0.00000  | 0.25347  | 0.36290  |
| 13 | C1 | PY  | -0.26285 | 0.00000  | 0.00000  | -0.82668 | -0.23861 |
| 14 | C1 | PZ  | 0.00000  | -0.36469 | 0.41287  | 0.00000  | 0.00000  |
| 15 | C1 | DXX | 0.06010  | 0.00000  | 0.00000  | 0.23997  | 0.20338  |
| 16 | C1 | DYY | -0.02342 | 0.00000  | 0.00000  | -0.04159 | -0.02086 |
| 17 | C1 | DZZ | -0.02159 | 0.00000  | 0.00000  | -0.24311 | -0.29187 |
| 18 | C1 | DXY | -0.07037 | 0.00000  | 0.00000  | 0.32532  | -0.09623 |
| 19 | C1 | DXZ | 0.00000  | 0.17301  | -0.30008 | 0.00000  | 0.00000  |
| 20 | C1 | DYZ | 0.00000  | -0.18267 | -0.01078 | 0.00000  | 0.00000  |
| 21 | C2 | S   | -0.01548 | 0.00000  | 0.00000  | 0.01677  | 0.01005  |
| 22 | C2 | S   | 0.10322  | 0.00000  | 0.00000  | 0.17969  | 0.11105  |
| 23 | C2 | PX  | 0.09901  | 0.00000  | 0.00000  | 0.03273  | 0.05506  |
| 24 | C2 | PY  | 0.00002  | 0.00000  | 0.00000  | -0.05623 | 0.12098  |
| 25 | C2 | PZ  | 0.00000  | 0.01243  | 0.04865  | 0.00000  | 0.00000  |
| 26 | C2 | S   | 0.68377  | 0.00000  | 0.00000  | -0.88507 | 0.22192  |
| 27 | C2 | PX  | 0.37682  | 0.00000  | 0.00000  | 0.08817  | 0.48929  |
| 28 | C2 | PY  | -0.10111 | 0.00000  | 0.00000  | 0.71356  | -0.08458 |
| 29 | C2 | PZ  | 0.00000  | 0.56589  | 0.10975  | 0.00000  | 0.00000  |
| 30 | C2 | DXX | -0.01186 | 0.00000  | 0.00000  | -0.26523 | -0.21651 |
| 31 | C2 | DYY | 0.03079  | 0.00000  | 0.00000  | 0.02430  | 0.06114  |
| 32 | C2 | DZZ | 0.00794  | 0.00000  | 0.00000  | 0.30692  | 0.24943  |
| 33 | C2 | DXY | 0.03736  | 0.00000  | 0.00000  | 0.17144  | -0.09673 |
| 34 | C2 | DXZ | 0.00000  | 0.33145  | 0.12661  | 0.00000  | 0.00000  |
| 35 | C2 | DYZ | 0.00000  | 0.17821  | -0.03643 | 0.00000  | 0.00000  |
| 36 | C3 | S   | -0.00381 | 0.00000  | 0.00000  | -0.00888 | -0.00588 |
| 37 | C3 | S   | -0.07604 | 0.00000  | 0.00000  | -0.31704 | -0.04207 |
| 38 | C3 | PX  | 0.14157  | 0.00000  | 0.00000  | 0.17059  | 0.16417  |

|    |    |     |          |          |          |          |          |
|----|----|-----|----------|----------|----------|----------|----------|
| 39 | C3 | PY  | 0.14222  | 0.00000  | 0.00000  | -0.11090 | -0.05280 |
| 40 | C3 | PZ  | 0.00000  | -0.04563 | -0.05181 | 0.00000  | 0.00000  |
| 41 | C3 | S   | -0.01404 | 0.00000  | 0.00000  | -0.26916 | 2.39976  |
| 42 | C3 | PX  | -0.66751 | 0.00000  | 0.00000  | -1.24083 | -0.36528 |
| 43 | C3 | PY  | -0.96341 | 0.00000  | 0.00000  | -0.21593 | -0.83834 |
| 44 | C3 | PZ  | 0.00000  | 0.27051  | -0.18900 | 0.00000  | 0.00000  |
| 45 | C3 | DXX | 0.15854  | 0.00000  | 0.00000  | -0.09624 | -0.00391 |
| 46 | C3 | DYY | -0.13510 | 0.00000  | 0.00000  | 0.25313  | -0.04569 |
| 47 | C3 | DZZ | -0.02006 | 0.00000  | 0.00000  | -0.25164 | 0.13701  |
| 48 | C3 | DXY | -0.08131 | 0.00000  | 0.00000  | -0.05309 | 0.27162  |
| 49 | C3 | DXZ | 0.00000  | 0.01266  | -0.18146 | 0.00000  | 0.00000  |
| 50 | C3 | DYZ | 0.00000  | -0.05159 | -0.24541 | 0.00000  | 0.00000  |
| 51 | C4 | S   | -0.00759 | 0.00000  | 0.00000  | -0.00284 | -0.02078 |
| 52 | C4 | S   | -0.26125 | 0.00000  | 0.00000  | 0.17553  | -0.41889 |
| 53 | C4 | PX  | 0.06120  | 0.00000  | 0.00000  | 0.06775  | 0.00376  |
| 54 | C4 | PY  | 0.11096  | 0.00000  | 0.00000  | -0.16573 | 0.15473  |
| 55 | C4 | PZ  | 0.00000  | 0.03011  | -0.03222 | 0.00000  | 0.00000  |
| 56 | C4 | S   | 0.09369  | 0.00000  | 0.00000  | 0.56127  | 1.47117  |
| 57 | C4 | PX  | -0.09082 | 0.00000  | 0.00000  | -0.18365 | -0.07630 |
| 58 | C4 | PY  | 0.09321  | 0.00000  | 0.00000  | 0.14237  | -0.87487 |
| 59 | C4 | PZ  | 0.00000  | 0.58793  | -0.32698 | 0.00000  | 0.00000  |
| 60 | C4 | DXX | 0.12253  | 0.00000  | 0.00000  | 0.02527  | -0.16250 |
| 61 | C4 | DYY | 0.08054  | 0.00000  | 0.00000  | -0.03955 | 0.34097  |
| 62 | C4 | DZZ | -0.29662 | 0.00000  | 0.00000  | 0.10764  | -0.24973 |
| 63 | C4 | DXY | 0.20023  | 0.00000  | 0.00000  | 0.07111  | 0.14771  |
| 64 | C4 | DXZ | 0.00000  | -0.37428 | -0.07389 | 0.00000  | 0.00000  |
| 65 | C4 | DYZ | 0.00000  | -0.22440 | 0.27931  | 0.00000  | 0.00000  |
| 66 | C5 | S   | -0.00820 | 0.00000  | 0.00000  | 0.01920  | 0.00811  |
| 67 | C5 | S   | -0.26065 | 0.00000  | 0.00000  | 0.17659  | 0.27164  |
| 68 | C5 | PX  | -0.03398 | 0.00000  | 0.00000  | 0.08177  | 0.13530  |
| 69 | C5 | PY  | 0.11784  | 0.00000  | 0.00000  | 0.01648  | -0.04336 |
| 70 | C5 | PZ  | 0.00000  | -0.04997 | -0.01728 | 0.00000  | 0.00000  |
| 71 | C5 | S   | 0.06010  | 0.00000  | 0.00000  | -0.82551 | -0.85701 |
| 72 | C5 | PX  | 0.13812  | 0.00000  | 0.00000  | -0.27631 | -0.49249 |
| 73 | C5 | PY  | -0.00601 | 0.00000  | 0.00000  | 0.05575  | 0.72496  |
| 74 | C5 | PZ  | 0.00000  | -0.69317 | 0.04488  | 0.00000  | 0.00000  |
| 75 | C5 | DXX | 0.17306  | 0.00000  | 0.00000  | -0.12494 | 0.02069  |
| 76 | C5 | DYY | 0.00230  | 0.00000  | 0.00000  | -0.10360 | -0.07550 |
| 77 | C5 | DZZ | -0.25072 | 0.00000  | 0.00000  | 0.23844  | 0.07806  |
| 78 | C5 | DXY | -0.17109 | 0.00000  | 0.00000  | 0.16101  | -0.07419 |
| 79 | C5 | DXZ | 0.00000  | -0.29365 | 0.20294  | 0.00000  | 0.00000  |
| 80 | C5 | DYZ | 0.00000  | 0.34193  | 0.11716  | 0.00000  | 0.00000  |
| 81 | C6 | S   | 0.00049  | 0.00000  | 0.00000  | 0.00237  | 0.02402  |
| 82 | C6 | S   | -0.06211 | 0.00000  | 0.00000  | 0.12422  | 0.20333  |
| 83 | C6 | PX  | -0.06709 | 0.00000  | 0.00000  | 0.15000  | 0.12658  |
| 84 | C6 | PY  | 0.13244  | 0.00000  | 0.00000  | 0.07795  | -0.01097 |
| 85 | C6 | PZ  | 0.00000  | 0.00732  | -0.03614 | 0.00000  | 0.00000  |
| 86 | C6 | S   | -0.13055 | 0.00000  | 0.00000  | -0.63945 | -0.70144 |
| 87 | C6 | PX  | 0.02455  | 0.00000  | 0.00000  | -1.02720 | -0.54390 |
| 88 | C6 | PY  | -1.18013 | 0.00000  | 0.00000  | 0.86839  | 0.04457  |
| 89 | C6 | PZ  | 0.00000  | -0.36112 | -0.03163 | 0.00000  | 0.00000  |
| 90 | C6 | DXX | 0.14104  | 0.00000  | 0.00000  | 0.10591  | 0.02827  |
| 91 | C6 | DYY | -0.13433 | 0.00000  | 0.00000  | -0.10971 | -0.19631 |
| 92 | C6 | DZZ | -0.02972 | 0.00000  | 0.00000  | 0.03519  | 0.12999  |



|     |    |     |          |          |          |          |          |
|-----|----|-----|----------|----------|----------|----------|----------|
| 93  | C6 | DXY | 0.09592  | 0.00000  | 0.00000  | 0.04780  | -0.15114 |
| 94  | C6 | DXZ | 0.00000  | 0.15467  | 0.20742  | 0.00000  | 0.00000  |
| 95  | C6 | DYZ | 0.00000  | -0.08030 | -0.08903 | 0.00000  | 0.00000  |
| 96  | C7 | S   | 0.00370  | 0.00000  | 0.00000  | -0.02091 | 0.02802  |
| 97  | C7 | S   | 0.07099  | 0.00000  | 0.00000  | -0.46971 | 0.43324  |
| 98  | C7 | PX  | -0.07777 | 0.00000  | 0.00000  | 0.22588  | -0.03712 |
| 99  | C7 | PY  | -0.04251 | 0.00000  | 0.00000  | -0.14950 | 0.22072  |
| 100 | C7 | PZ  | 0.00000  | -0.01659 | -0.02955 | 0.00000  | 0.00000  |
| 101 | C7 | S   | -0.35665 | 0.00000  | 0.00000  | 1.06709  | -2.77856 |
| 102 | C7 | PX  | 0.15076  | 0.00000  | 0.00000  | -0.58804 | 1.70973  |
| 103 | C7 | PY  | 0.09820  | 0.00000  | 0.00000  | 0.72667  | -1.22577 |
| 104 | C7 | PZ  | 0.00000  | -0.13610 | -0.18055 | 0.00000  | 0.00000  |
| 105 | C7 | DXX | 0.06858  | 0.00000  | 0.00000  | 0.08549  | 0.12275  |
| 106 | C7 | DYY | -0.01716 | 0.00000  | 0.00000  | 0.01643  | -0.26680 |
| 107 | C7 | DZZ | -0.00336 | 0.00000  | 0.00000  | -0.23913 | 0.13885  |
| 108 | C7 | DXY | 0.07780  | 0.00000  | 0.00000  | -0.14441 | 0.01774  |
| 109 | C7 | DXZ | 0.00000  | 0.09768  | 0.28454  | 0.00000  | 0.00000  |
| 110 | C7 | DYZ | 0.00000  | 0.01494  | 0.35362  | 0.00000  | 0.00000  |
| 111 | H3 | S   | -0.20543 | 0.00000  | 0.00000  | -0.04845 | -0.24530 |
| 112 | H3 | S   | 0.03969  | 0.00000  | 0.00000  | -0.01489 | 0.31529  |
| 113 | H3 | PX  | 0.04110  | 0.00000  | 0.00000  | 0.01280  | -0.16811 |
| 114 | H3 | PY  | -0.12610 | 0.00000  | 0.00000  | 0.01576  | -0.07321 |
| 115 | H3 | PZ  | 0.00000  | -0.31817 | 0.21713  | 0.00000  | 0.00000  |
| 116 | H4 | S   | -0.13578 | 0.00000  | 0.00000  | 0.20091  | -0.08643 |
| 117 | H4 | S   | 0.06720  | 0.00000  | 0.00000  | -0.11430 | -0.23073 |
| 118 | H4 | PX  | -0.05360 | 0.00000  | 0.00000  | 0.00990  | -0.05639 |
| 119 | H4 | PY  | -0.11202 | 0.00000  | 0.00000  | 0.08244  | -0.03054 |
| 120 | H4 | PZ  | 0.00000  | 0.40042  | 0.01069  | 0.00000  | 0.00000  |
| 121 | N1 | S   | -0.00136 | 0.00000  | 0.00000  | -0.01325 | 0.00678  |
| 122 | N1 | S   | 0.07285  | 0.00000  | 0.00000  | -0.03042 | 0.44267  |
| 123 | N1 | PX  | 0.10031  | 0.00000  | 0.00000  | 0.16047  | 0.15563  |
| 124 | N1 | PY  | 0.00017  | 0.00000  | 0.00000  | 0.03366  | 0.20498  |
| 125 | N1 | PZ  | 0.00000  | -0.01118 | 0.05343  | 0.00000  | 0.00000  |
| 126 | N1 | S   | -0.03064 | 0.00000  | 0.00000  | 0.79096  | -1.11553 |
| 127 | N1 | PX  | 0.11571  | 0.00000  | 0.00000  | 0.19695  | -0.50608 |
| 128 | N1 | PY  | -0.40695 | 0.00000  | 0.00000  | -0.02978 | -0.31452 |
| 129 | N1 | PZ  | 0.00000  | 0.10204  | -0.15163 | 0.00000  | 0.00000  |
| 130 | N1 | DXX | -0.04190 | 0.00000  | 0.00000  | -0.12990 | -0.14772 |
| 131 | N1 | DYY | 0.05590  | 0.00000  | 0.00000  | 0.11412  | 0.14137  |
| 132 | N1 | DZZ | 0.03872  | 0.00000  | 0.00000  | 0.02410  | 0.11977  |
| 133 | N1 | DXY | -0.05298 | 0.00000  | 0.00000  | -0.07752 | -0.10783 |
| 134 | N1 | DXZ | 0.00000  | 0.01547  | -0.27047 | 0.00000  | 0.00000  |
| 135 | N1 | DYZ | 0.00000  | 0.12359  | 0.22284  | 0.00000  | 0.00000  |
| 136 | H6 | S   | 0.04701  | 0.00000  | 0.00000  | 0.29325  | 0.26285  |
| 137 | H6 | S   | 0.08944  | 0.00000  | 0.00000  | 0.01359  | 0.05487  |
| 138 | H6 | PX  | -0.02698 | 0.00000  | 0.00000  | -0.09563 | -0.10442 |
| 139 | H6 | PY  | -0.05944 | 0.00000  | 0.00000  | -0.04563 | 0.07799  |
| 140 | H6 | PZ  | 0.00000  | -0.30051 | -0.10156 | 0.00000  | 0.00000  |
| 141 | C8 | S   | 0.01993  | 0.00000  | 0.00000  | -0.00226 | 0.00262  |
| 142 | C8 | S   | -0.13174 | 0.00000  | 0.00000  | -0.04224 | 0.03940  |
| 143 | C8 | PX  | -0.03462 | 0.00000  | 0.00000  | 0.11543  | 0.00608  |
| 144 | C8 | PY  | 0.30904  | 0.00000  | 0.00000  | 0.06866  | -0.15362 |
| 145 | C8 | PZ  | 0.00000  | 0.01170  | 0.09928  | 0.00000  | 0.00000  |
| 146 | C8 | S   | -0.05569 | 0.00000  | 0.00000  | -0.43860 | 0.94869  |

|     |     |     |          |          |          |          |          |
|-----|-----|-----|----------|----------|----------|----------|----------|
| 147 | C8  | PX  | 0.50405  | 0.00000  | 0.00000  | 0.04533  | 0.53344  |
| 148 | C8  | PY  | -1.64793 | 0.00000  | 0.00000  | -0.41818 | 2.07394  |
| 149 | C8  | PZ  | 0.00000  | 0.09768  | 0.48173  | 0.00000  | 0.00000  |
| 150 | C8  | DXX | -0.19448 | 0.00000  | 0.00000  | 0.01370  | 0.01477  |
| 151 | C8  | DYY | 0.09712  | 0.00000  | 0.00000  | 0.02139  | -0.14185 |
| 152 | C8  | DZZ | 0.04365  | 0.00000  | 0.00000  | -0.07637 | 0.19988  |
| 153 | C8  | DXY | 0.04008  | 0.00000  | 0.00000  | 0.14712  | 0.05275  |
| 154 | C8  | DXZ | 0.00000  | 0.10355  | 0.13947  | 0.00000  | 0.00000  |
| 155 | C8  | DYZ | 0.00000  | -0.00723 | -0.08979 | 0.00000  | 0.00000  |
| 156 | H8  | S   | 0.01592  | 0.00000  | 0.00000  | -0.07377 | -0.20786 |
| 157 | H8  | S   | -0.02668 | 0.00000  | 0.00000  | 0.29858  | -0.50466 |
| 158 | H8  | PX  | 0.00318  | 0.00000  | 0.00000  | -0.10963 | -0.02524 |
| 159 | H8  | PY  | -0.02693 | 0.00000  | 0.00000  | -0.03831 | 0.12481  |
| 160 | H8  | PZ  | 0.00000  | 0.06640  | 0.17044  | 0.00000  | 0.00000  |
| 161 | C10 | S   | 0.01585  | 0.00000  | 0.00000  | -0.00163 | 0.00407  |
| 162 | C10 | S   | 0.06933  | 0.00000  | 0.00000  | -0.00954 | 0.13109  |
| 163 | C10 | PX  | 0.00707  | 0.00000  | 0.00000  | -0.05732 | 0.06234  |
| 164 | C10 | PY  | -0.04666 | 0.00000  | 0.00000  | -0.00288 | 0.14745  |
| 165 | C10 | PZ  | 0.00000  | -0.00347 | -0.03266 | 0.00000  | 0.00000  |
| 166 | C10 | S   | -1.39816 | 0.00000  | 0.00000  | -0.15692 | 1.12298  |
| 167 | C10 | PX  | -0.28673 | 0.00000  | 0.00000  | 0.42683  | -0.53078 |
| 168 | C10 | PY  | 0.09852  | 0.00000  | 0.00000  | 0.08794  | 0.12259  |
| 169 | C10 | PZ  | 0.00000  | -0.05135 | -0.29087 | 0.00000  | 0.00000  |
| 170 | C10 | DXX | -0.48807 | 0.00000  | 0.00000  | -0.13303 | 0.14170  |
| 171 | C10 | DYY | 0.24839  | 0.00000  | 0.00000  | 0.09752  | -0.15573 |
| 172 | C10 | DZZ | 0.33398  | 0.00000  | 0.00000  | 0.04809  | 0.02706  |
| 173 | C10 | DXY | 0.07743  | 0.00000  | 0.00000  | -0.19936 | 0.06428  |
| 174 | C10 | DXZ | 0.00000  | 0.00024  | -0.02430 | 0.00000  | 0.00000  |
| 175 | C10 | DYZ | 0.00000  | -0.05959 | -0.36960 | 0.00000  | 0.00000  |
| 176 | H16 | S   | 0.39242  | 0.00000  | 0.00000  | -0.14073 | 0.06803  |
| 177 | H16 | S   | 0.13277  | 0.00000  | 0.00000  | -0.07143 | 0.09161  |
| 178 | H16 | PX  | -0.02258 | 0.00000  | 0.00000  | -0.16301 | 0.12777  |
| 179 | H16 | PY  | -0.27421 | 0.00000  | 0.00000  | -0.14095 | 0.18607  |
| 180 | H16 | PZ  | 0.00000  | 0.00826  | 0.12752  | 0.00000  | 0.00000  |
| 181 | H18 | S   | 0.28862  | 0.00000  | 0.00000  | 0.26943  | -0.21006 |
| 182 | H18 | S   | -0.05124 | 0.00000  | 0.00000  | 0.11380  | -0.22681 |
| 183 | H18 | PX  | 0.02691  | 0.00000  | 0.00000  | -0.13227 | 0.06830  |
| 184 | H18 | PY  | -0.30189 | 0.00000  | 0.00000  | 0.00567  | 0.01707  |
| 185 | H18 | PZ  | 0.00000  | 0.03918  | 0.18883  | 0.00000  | 0.00000  |

|              |          |          |          |          |          |
|--------------|----------|----------|----------|----------|----------|
| MO:          | 126      | 127      | 128      | 129      | 130      |
| Eigenvalues: | 2.31922  | 2.35383  | 2.39048  | 2.39593  | 2.43253  |
| (ev):        | 63.10911 | 64.05112 | 65.04840 | 65.19658 | 66.19258 |

|   |    | A  | A        | A        | A        | A        |          |
|---|----|----|----------|----------|----------|----------|----------|
| 1 | H1 | S  | 0.02400  | -0.05257 | -0.06064 | 0.07386  | -0.07682 |
| 2 | H1 | S  | -0.04584 | -0.31394 | 0.07346  | -0.04732 | -0.03608 |
| 3 | H1 | PX | 0.00933  | 0.01852  | -0.03702 | 0.01199  | -0.05109 |
| 4 | H1 | PY | 0.00777  | 0.09691  | -0.20188 | -0.19909 | -0.06050 |
| 5 | H1 | PZ | 0.00000  | 0.00000  | 0.00000  | 0.00000  | 0.00000  |
| 6 | C1 | S  | 0.01541  | 0.02509  | -0.01714 | -0.00773 | 0.00557  |
| 7 | C1 | S  | 0.14187  | 0.52236  | -0.16112 | -0.03293 | -0.04459 |
| 8 | C1 | PX | -0.04063 | -0.20445 | 0.07104  | 0.06300  | 0.04492  |
| 9 | C1 | PY | 0.05785  | 0.11613  | -0.26290 | -0.15749 | -0.02599 |

|    |    |     |          |          |          |          |          |
|----|----|-----|----------|----------|----------|----------|----------|
| 10 | C1 | PZ  | 0.00000  | 0.00000  | 0.00000  | 0.00000  | 0.00000  |
| 11 | C1 | S   | -1.08849 | -1.31710 | 0.49038  | -0.29791 | -1.10412 |
| 12 | C1 | PX  | 0.29685  | 1.15189  | -0.23893 | 0.06825  | 0.40258  |
| 13 | C1 | PY  | 0.56297  | 0.14357  | 0.65664  | 0.31447  | 0.35839  |
| 14 | C1 | PZ  | 0.00000  | 0.00000  | 0.00000  | 0.00000  | 0.00000  |
| 15 | C1 | DXX | -0.00962 | -0.04746 | 0.10253  | -0.04166 | 0.05896  |
| 16 | C1 | DYY | -0.07044 | -0.12826 | -0.02700 | 0.06460  | 0.01252  |
| 17 | C1 | DZZ | 0.14106  | 0.28220  | -0.17228 | -0.10957 | -0.14487 |
| 18 | C1 | DXY | -0.09582 | 0.06214  | -0.09287 | -0.24729 | 0.06128  |
| 19 | C1 | DXZ | 0.00000  | 0.00000  | 0.00000  | 0.00000  | 0.00000  |
| 20 | C1 | DYZ | 0.00000  | 0.00000  | 0.00000  | 0.00000  | 0.00000  |
| 21 | C2 | S   | 0.02783  | 0.01446  | -0.01074 | -0.00111 | 0.00956  |
| 22 | C2 | S   | 0.41721  | 0.28022  | -0.10279 | 0.08687  | -0.12014 |
| 23 | C2 | PX  | 0.14917  | 0.06111  | -0.02587 | 0.09779  | -0.10106 |
| 24 | C2 | PY  | 0.09296  | 0.07419  | -0.30445 | 0.00122  | -0.03221 |
| 25 | C2 | PZ  | 0.00000  | 0.00000  | 0.00000  | 0.00000  | 0.00000  |
| 26 | C2 | S   | -1.21524 | -1.37794 | 0.82655  | 0.83701  | -0.62052 |
| 27 | C2 | PX  | -1.49807 | -0.24806 | 0.75570  | 0.40278  | -0.14514 |
| 28 | C2 | PY  | -0.65051 | 0.85151  | 1.30602  | 0.42939  | 0.36493  |
| 29 | C2 | PZ  | 0.00000  | 0.00000  | 0.00000  | 0.00000  | 0.00000  |
| 30 | C2 | DXX | -0.02978 | -0.16804 | -0.00017 | 0.09507  | -0.03407 |
| 31 | C2 | DYY | -0.15868 | 0.03977  | -0.05175 | -0.15157 | -0.03393 |
| 32 | C2 | DZZ | 0.29599  | 0.19430  | 0.01608  | 0.13582  | 0.03926  |
| 33 | C2 | DXY | -0.23722 | 0.28047  | 0.16681  | -0.11645 | 0.05017  |
| 34 | C2 | DXZ | 0.00000  | 0.00000  | 0.00000  | 0.00000  | 0.00000  |
| 35 | C2 | DYZ | 0.00000  | 0.00000  | 0.00000  | 0.00000  | 0.00000  |
| 36 | C3 | S   | 0.00913  | 0.01098  | -0.01259 | -0.01486 | 0.02077  |
| 37 | C3 | S   | 0.24403  | 0.01868  | 0.18534  | -0.24254 | 0.30393  |
| 38 | C3 | PX  | 0.01265  | 0.11396  | -0.10762 | 0.08807  | -0.25064 |
| 39 | C3 | PY  | -0.18585 | -0.18140 | 0.02728  | 0.18544  | -0.14087 |
| 40 | C3 | PZ  | 0.00000  | 0.00000  | 0.00000  | 0.00000  | 0.00000  |
| 41 | C3 | S   | -1.89903 | 1.75029  | 1.60294  | 2.24348  | 0.83156  |
| 42 | C3 | PX  | 1.25809  | -0.32136 | 0.06378  | -0.81245 | 1.16067  |
| 43 | C3 | PY  | 1.64478  | 0.68957  | -0.93609 | -0.90895 | 0.40005  |
| 44 | C3 | PZ  | 0.00000  | 0.00000  | 0.00000  | 0.00000  | 0.00000  |
| 45 | C3 | DXX | 0.08783  | 0.01466  | -0.19564 | -0.00535 | -0.33302 |
| 46 | C3 | DYY | 0.00745  | -0.12969 | 0.10616  | -0.00638 | 0.04717  |
| 47 | C3 | DZZ | -0.02410 | 0.22636  | 0.11949  | 0.04114  | 0.35293  |
| 48 | C3 | DXY | -0.04897 | -0.05979 | -0.19475 | -0.02991 | 0.13904  |
| 49 | C3 | DXZ | 0.00000  | 0.00000  | 0.00000  | 0.00000  | 0.00000  |
| 50 | C3 | DYZ | 0.00000  | 0.00000  | 0.00000  | 0.00000  | 0.00000  |
| 51 | C4 | S   | 0.02085  | 0.00570  | -0.01888 | -0.01079 | -0.01029 |
| 52 | C4 | S   | 0.09585  | -0.02400 | -0.31732 | -0.34192 | -0.14514 |
| 53 | C4 | PX  | 0.02415  | 0.09411  | 0.14552  | 0.00457  | 0.05234  |
| 54 | C4 | PY  | -0.00834 | -0.06861 | 0.09867  | 0.18359  | 0.02251  |
| 55 | C4 | PZ  | 0.00000  | 0.00000  | 0.00000  | 0.00000  | 0.00000  |
| 56 | C4 | S   | -0.48859 | 0.70809  | -0.17340 | 0.19611  | 0.62837  |
| 57 | C4 | PX  | 0.04976  | -0.55949 | -0.58027 | 0.04394  | -0.29873 |
| 58 | C4 | PY  | 0.00883  | -0.03066 | -0.44495 | -0.99697 | -0.57597 |
| 59 | C4 | PZ  | 0.00000  | 0.00000  | 0.00000  | 0.00000  | 0.00000  |
| 60 | C4 | DXX | -0.10444 | 0.08206  | 0.22574  | 0.00835  | 0.03779  |
| 61 | C4 | DYY | -0.08095 | -0.09310 | 0.00536  | 0.09050  | 0.04638  |
| 62 | C4 | DZZ | 0.21997  | 0.07468  | -0.29487 | -0.18298 | -0.04493 |
| 63 | C4 | DXY | 0.00732  | 0.27027  | -0.19972 | -0.14265 | -0.11300 |

|     |    |     |          |          |          |          |          |
|-----|----|-----|----------|----------|----------|----------|----------|
| 64  | C4 | DXZ | 0.00000  | 0.00000  | 0.00000  | 0.00000  | 0.00000  |
| 65  | C4 | DYZ | 0.00000  | 0.00000  | 0.00000  | 0.00000  | 0.00000  |
| 66  | C5 | S   | 0.02145  | 0.00693  | -0.00677 | 0.00633  | -0.00055 |
| 67  | C5 | S   | 0.39117  | -0.26055 | -0.15859 | 0.18875  | 0.04355  |
| 68  | C5 | PX  | -0.05476 | -0.01853 | -0.14620 | -0.07951 | -0.05666 |
| 69  | C5 | PY  | -0.25976 | 0.16931  | 0.06819  | -0.12790 | -0.03783 |
| 70  | C5 | PZ  | 0.00000  | 0.00000  | 0.00000  | 0.00000  | 0.00000  |
| 71  | C5 | S   | 0.74738  | -0.41822 | -1.37862 | -0.85248 | -0.41350 |
| 72  | C5 | PX  | 0.18539  | 0.04232  | 0.48132  | 0.43036  | -0.18110 |
| 73  | C5 | PY  | 0.10243  | -0.29387 | 0.22279  | 1.03334  | 0.12138  |
| 74  | C5 | PZ  | 0.00000  | 0.00000  | 0.00000  | 0.00000  | 0.00000  |
| 75  | C5 | DXX | 0.04592  | -0.01080 | 0.16479  | 0.15028  | -0.01858 |
| 76  | C5 | DYY | -0.29155 | 0.03579  | -0.01628 | -0.16996 | 0.08793  |
| 77  | C5 | DZZ | 0.42176  | -0.09298 | -0.22356 | 0.05355  | -0.08788 |
| 78  | C5 | DXY | -0.07494 | -0.11394 | 0.25368  | -0.06913 | 0.14311  |
| 79  | C5 | DXZ | 0.00000  | 0.00000  | 0.00000  | 0.00000  | 0.00000  |
| 80  | C5 | DYZ | 0.00000  | 0.00000  | 0.00000  | 0.00000  | 0.00000  |
| 81  | C6 | S   | -0.00275 | 0.01497  | 0.00102  | 0.00392  | 0.02227  |
| 82  | C6 | S   | -0.31696 | 0.23902  | 0.39062  | 0.26287  | 0.44458  |
| 83  | C6 | PX  | -0.04718 | -0.01933 | 0.19040  | 0.04526  | 0.22778  |
| 84  | C6 | PY  | -0.19022 | -0.03060 | 0.16287  | -0.11937 | -0.05308 |
| 85  | C6 | PZ  | 0.00000  | 0.00000  | 0.00000  | 0.00000  | 0.00000  |
| 86  | C6 | S   | 0.30953  | 0.17929  | 0.09572  | -0.80912 | -0.17304 |
| 87  | C6 | PX  | 1.55183  | -1.14658 | -1.29488 | -1.19125 | -0.37864 |
| 88  | C6 | PY  | 2.01923  | 0.82293  | -0.95835 | -0.28778 | 1.31706  |
| 89  | C6 | PZ  | 0.00000  | 0.00000  | 0.00000  | 0.00000  | 0.00000  |
| 90  | C6 | DXX | -0.06883 | 0.19275  | -0.25249 | 0.01317  | -0.21232 |
| 91  | C6 | DYY | 0.06383  | -0.22362 | 0.09199  | 0.07471  | -0.03687 |
| 92  | C6 | DZZ | 0.07968  | 0.15253  | 0.13844  | -0.12049 | 0.31688  |
| 93  | C6 | DXY | 0.07126  | 0.01424  | 0.24987  | 0.25484  | -0.17436 |
| 94  | C6 | DXZ | 0.00000  | 0.00000  | 0.00000  | 0.00000  | 0.00000  |
| 95  | C6 | DYZ | 0.00000  | 0.00000  | 0.00000  | 0.00000  | 0.00000  |
| 96  | C7 | S   | -0.02066 | 0.01017  | 0.00725  | 0.01110  | 0.00887  |
| 97  | C7 | S   | -0.41745 | 0.33353  | -0.07702 | 0.40147  | 0.04599  |
| 98  | C7 | PX  | 0.10627  | -0.11130 | 0.07795  | -0.14995 | 0.11629  |
| 99  | C7 | PY  | -0.04701 | -0.01796 | -0.12664 | -0.10712 | 0.14140  |
| 100 | C7 | PZ  | 0.00000  | 0.00000  | 0.00000  | 0.00000  | 0.00000  |
| 101 | C7 | S   | 2.29039  | -0.92377 | -1.61896 | -2.32243 | -0.70336 |
| 102 | C7 | PX  | -1.60818 | 0.69152  | 0.78896  | 1.41184  | -0.04463 |
| 103 | C7 | PY  | 0.31636  | -0.31305 | -0.34553 | 0.15615  | -1.02757 |
| 104 | C7 | PZ  | 0.00000  | 0.00000  | 0.00000  | 0.00000  | 0.00000  |
| 105 | C7 | DXX | 0.21210  | 0.04282  | 0.10907  | -0.01716 | -0.08488 |
| 106 | C7 | DYY | -0.11453 | -0.16292 | -0.10606 | -0.02805 | 0.06059  |
| 107 | C7 | DZZ | -0.09331 | 0.12066  | -0.16117 | -0.00315 | 0.06117  |
| 108 | C7 | DXY | 0.02784  | 0.05380  | -0.10418 | -0.21424 | 0.20934  |
| 109 | C7 | DXZ | 0.00000  | 0.00000  | 0.00000  | 0.00000  | 0.00000  |
| 110 | C7 | DYZ | 0.00000  | 0.00000  | 0.00000  | 0.00000  | 0.00000  |
| 111 | H3 | S   | 0.08320  | -0.09223 | 0.17524  | 0.14219  | 0.09092  |
| 112 | H3 | S   | -0.01458 | 0.08536  | 0.19694  | 0.26734  | 0.17310  |
| 113 | H3 | PX  | -0.01473 | 0.20077  | 0.05305  | -0.11494 | 0.00039  |
| 114 | H3 | PY  | 0.01876  | -0.14206 | 0.01868  | 0.04450  | 0.04701  |
| 115 | H3 | PZ  | 0.00000  | 0.00000  | 0.00000  | 0.00000  | 0.00000  |
| 116 | H4 | S   | 0.08638  | -0.02484 | 0.20490  | -0.03144 | 0.02168  |
| 117 | H4 | S   | -0.10082 | 0.14372  | 0.03747  | -0.18459 | -0.06340 |

|     |     |     |          |          |          |          |          |
|-----|-----|-----|----------|----------|----------|----------|----------|
| 118 | H4  | PX  | -0.18089 | 0.00818  | -0.07559 | -0.19787 | 0.02458  |
| 119 | H4  | PY  | -0.01371 | -0.08526 | 0.02024  | -0.09209 | 0.03058  |
| 120 | H4  | PZ  | 0.00000  | 0.00000  | 0.00000  | 0.00000  | 0.00000  |
| 121 | N1  | S   | -0.02206 | 0.00619  | 0.01170  | 0.00431  | 0.02078  |
| 122 | N1  | S   | -0.47109 | 0.19503  | 0.31108  | -0.19741 | -0.06058 |
| 123 | N1  | PX  | -0.05830 | 0.02661  | 0.06649  | -0.12635 | -0.21449 |
| 124 | N1  | PY  | -0.14845 | 0.06885  | -0.23384 | -0.04801 | 0.27645  |
| 125 | N1  | PZ  | 0.00000  | 0.00000  | 0.00000  | 0.00000  | 0.00000  |
| 126 | N1  | S   | 2.30604  | -0.73146 | -1.67926 | -0.02480 | -0.66271 |
| 127 | N1  | PX  | 0.32939  | -0.07045 | -0.40807 | 0.22311  | -0.27427 |
| 128 | N1  | PY  | 1.10545  | -0.19937 | -0.07041 | -0.69503 | 0.33324  |
| 129 | N1  | PZ  | 0.00000  | 0.00000  | 0.00000  | 0.00000  | 0.00000  |
| 130 | N1  | DXX | -0.08537 | 0.24012  | -0.04279 | -0.10770 | 0.03914  |
| 131 | N1  | DYY | 0.02630  | -0.16779 | 0.09447  | 0.01971  | 0.03974  |
| 132 | N1  | DZZ | -0.03706 | -0.01450 | -0.06559 | -0.01765 | -0.07079 |
| 133 | N1  | DXY | -0.05662 | 0.01838  | 0.10273  | -0.08063 | -0.12073 |
| 134 | N1  | DXZ | 0.00000  | 0.00000  | 0.00000  | 0.00000  | 0.00000  |
| 135 | N1  | DYZ | 0.00000  | 0.00000  | 0.00000  | 0.00000  | 0.00000  |
| 136 | H6  | S   | -0.14285 | 0.18737  | 0.09316  | -0.04003 | 0.02647  |
| 137 | H6  | S   | -0.43687 | -0.02819 | 0.20793  | 0.11789  | -0.02266 |
| 138 | H6  | PX  | -0.02008 | -0.06582 | 0.01133  | -0.00326 | 0.01162  |
| 139 | H6  | PY  | 0.20070  | -0.11082 | -0.21931 | 0.09720  | -0.09248 |
| 140 | H6  | PZ  | 0.00000  | 0.00000  | 0.00000  | 0.00000  | 0.00000  |
| 141 | C8  | S   | -0.01204 | -0.02153 | -0.01785 | -0.01207 | -0.02407 |
| 142 | C8  | S   | -0.28035 | -0.27247 | -0.04869 | -0.05461 | -0.46380 |
| 143 | C8  | PX  | -0.05877 | 0.00896  | -0.03473 | 0.05447  | -0.00188 |
| 144 | C8  | PY  | 0.04043  | -0.12702 | 0.04173  | 0.00996  | -0.03020 |
| 145 | C8  | PZ  | 0.00000  | 0.00000  | 0.00000  | 0.00000  | 0.00000  |
| 146 | C8  | S   | -1.12274 | 0.36080  | 0.86075  | 0.59126  | -0.24972 |
| 147 | C8  | PX  | -0.42600 | -0.02173 | 0.35245  | 0.96761  | -0.97526 |
| 148 | C8  | PY  | -0.16512 | 1.83608  | 0.82854  | 0.78784  | 3.01895  |
| 149 | C8  | PZ  | 0.00000  | 0.00000  | 0.00000  | 0.00000  | 0.00000  |
| 150 | C8  | DXX | -0.01494 | -0.22312 | -0.07463 | -0.12076 | 0.41130  |
| 151 | C8  | DYY | 0.17087  | 0.19206  | 0.09888  | 0.08271  | -0.14758 |
| 152 | C8  | DZZ | -0.31549 | -0.07992 | -0.06138 | 0.03569  | -0.40430 |
| 153 | C8  | DXY | 0.00468  | -0.06574 | 0.18156  | -0.22495 | -0.25645 |
| 154 | C8  | DXZ | 0.00000  | 0.00000  | 0.00000  | 0.00000  | 0.00000  |
| 155 | C8  | DYZ | 0.00000  | 0.00000  | 0.00000  | 0.00000  | 0.00000  |
| 156 | H8  | S   | -0.00683 | -0.02211 | -0.17593 | -0.12102 | 0.12301  |
| 157 | H8  | S   | 0.48318  | -0.20710 | -0.11012 | -0.21648 | -0.11692 |
| 158 | H8  | PX  | 0.02559  | 0.04123  | -0.12540 | -0.07168 | 0.17889  |
| 159 | H8  | PY  | 0.12029  | 0.12606  | 0.01057  | -0.01186 | 0.25853  |
| 160 | H8  | PZ  | 0.00000  | 0.00000  | 0.00000  | 0.00000  | 0.00000  |
| 161 | C10 | S   | -0.02448 | -0.03219 | -0.01673 | -0.00978 | -0.01561 |
| 162 | C10 | S   | -0.18592 | -0.25379 | -0.13278 | -0.07382 | 0.12045  |
| 163 | C10 | PX  | 0.06649  | -0.03584 | 0.08469  | -0.14618 | -0.01506 |
| 164 | C10 | PY  | -0.07453 | -0.04572 | -0.05343 | 0.01048  | 0.24608  |
| 165 | C10 | PZ  | 0.00000  | 0.00000  | 0.00000  | 0.00000  | 0.00000  |
| 166 | C10 | S   | 0.54539  | 1.77216  | 0.66947  | 0.64729  | 2.19298  |
| 167 | C10 | PX  | -0.30641 | 0.24452  | -0.54573 | 0.31784  | 0.64563  |
| 168 | C10 | PY  | 0.49994  | 0.51108  | 0.22594  | 0.16616  | 1.04027  |
| 169 | C10 | PZ  | 0.00000  | 0.00000  | 0.00000  | 0.00000  | 0.00000  |
| 170 | C10 | DXX | -0.07704 | 0.14169  | 0.08127  | 0.04032  | -0.15750 |
| 171 | C10 | DYY | 0.23769  | 0.16417  | 0.06866  | 0.04873  | 0.21358  |

|     |     |     |          |          |          |          |          |
|-----|-----|-----|----------|----------|----------|----------|----------|
| 172 | C10 | DZZ | -0.25143 | -0.50481 | -0.26853 | -0.14861 | 0.01614  |
| 173 | C10 | DXY | 0.22302  | -0.03133 | 0.05028  | -0.10974 | 0.10035  |
| 174 | C10 | DXZ | 0.00000  | 0.00000  | 0.00000  | 0.00000  | 0.00000  |
| 175 | C10 | DYZ | 0.00000  | 0.00000  | 0.00000  | 0.00000  | 0.00000  |
| 176 | H16 | S   | 0.16515  | -0.23791 | 0.01802  | -0.15587 | 0.00165  |
| 177 | H16 | S   | 0.11264  | -0.10088 | 0.20543  | -0.16491 | -0.21629 |
| 178 | H16 | PX  | 0.10756  | -0.12417 | 0.12222  | -0.31587 | -0.10020 |
| 179 | H16 | PY  | 0.01440  | 0.02260  | 0.22389  | -0.29841 | -0.30303 |
| 180 | H16 | PZ  | 0.00000  | 0.00000  | 0.00000  | 0.00000  | 0.00000  |
| 181 | H18 | S   | -0.19514 | -0.14546 | -0.19796 | 0.03833  | 0.06204  |
| 182 | H18 | S   | -0.04439 | 0.05447  | -0.21438 | 0.15366  | 0.26595  |
| 183 | H18 | PX  | 0.18927  | -0.00521 | 0.16114  | -0.22896 | -0.05106 |
| 184 | H18 | PY  | -0.22599 | 0.18817  | -0.14073 | 0.40441  | -0.02772 |
| 185 | H18 | PZ  | 0.00000  | 0.00000  | 0.00000  | 0.00000  | 0.00000  |

|              |          |          |          |          |          |
|--------------|----------|----------|----------|----------|----------|
| MO:          | 131      | 132      | 133      | 134      | 135      |
| Eigenvalues: | 2.43724  | 2.52134  | 2.52181  | 2.56069  | 2.61248  |
| (ev):        | 66.32070 | 68.60917 | 68.62186 | 69.68007 | 71.08919 |

|    |    | A   | A        | A        | A        | A        |          |
|----|----|-----|----------|----------|----------|----------|----------|
| 1  | H1 | S   | 0.00000  | 0.00000  | 0.00933  | 0.00000  | 0.00000  |
| 2  | H1 | S   | 0.00000  | 0.00000  | -0.11783 | 0.00000  | 0.00000  |
| 3  | H1 | PX  | 0.00000  | 0.00000  | 0.05784  | 0.00000  | 0.00000  |
| 4  | H1 | PY  | 0.00000  | 0.00000  | -0.07784 | 0.00000  | 0.00000  |
| 5  | H1 | PZ  | -0.13363 | 0.21529  | 0.00000  | -0.23467 | 0.18022  |
| 6  | C1 | S   | 0.00000  | 0.00000  | -0.02962 | 0.00000  | 0.00000  |
| 7  | C1 | S   | 0.00000  | 0.00000  | -0.15863 | 0.00000  | 0.00000  |
| 8  | C1 | PX  | 0.00000  | 0.00000  | 0.05661  | 0.00000  | 0.00000  |
| 9  | C1 | PY  | 0.00000  | 0.00000  | -0.10649 | 0.00000  | 0.00000  |
| 10 | C1 | PZ  | -0.01006 | -0.10910 | 0.00000  | 0.04925  | -0.04378 |
| 11 | C1 | S   | 0.00000  | 0.00000  | 0.09679  | 0.00000  | 0.00000  |
| 12 | C1 | PX  | 0.00000  | 0.00000  | 0.26863  | 0.00000  | 0.00000  |
| 13 | C1 | PY  | 0.00000  | 0.00000  | -1.02837 | 0.00000  | 0.00000  |
| 14 | C1 | PZ  | 0.04275  | -0.11954 | 0.00000  | 0.11144  | -0.00725 |
| 15 | C1 | DXX | 0.00000  | 0.00000  | -0.11695 | 0.00000  | 0.00000  |
| 16 | C1 | DYY | 0.00000  | 0.00000  | 0.43344  | 0.00000  | 0.00000  |
| 17 | C1 | DZZ | 0.00000  | 0.00000  | -0.38986 | 0.00000  | 0.00000  |
| 18 | C1 | DXY | 0.00000  | 0.00000  | 0.13279  | 0.00000  | 0.00000  |
| 19 | C1 | DXZ | 0.02801  | 0.07069  | 0.00000  | 0.00392  | -0.08212 |
| 20 | C1 | DYZ | 0.02026  | -0.05215 | 0.00000  | 0.36538  | 0.38216  |
| 21 | C2 | S   | 0.00000  | 0.00000  | 0.03630  | 0.00000  | 0.00000  |
| 22 | C2 | S   | 0.00000  | 0.00000  | 0.30031  | 0.00000  | 0.00000  |
| 23 | C2 | PX  | 0.00000  | 0.00000  | 0.05897  | 0.00000  | 0.00000  |
| 24 | C2 | PY  | 0.00000  | 0.00000  | 0.19739  | 0.00000  | 0.00000  |
| 25 | C2 | PZ  | 0.02912  | 0.05822  | 0.00000  | 0.07453  | 0.07395  |
| 26 | C2 | S   | 0.00000  | 0.00000  | -0.58775 | 0.00000  | 0.00000  |
| 27 | C2 | PX  | 0.00000  | 0.00000  | 0.13407  | 0.00000  | 0.00000  |
| 28 | C2 | PY  | 0.00000  | 0.00000  | 1.13109  | 0.00000  | 0.00000  |
| 29 | C2 | PZ  | -0.02122 | 0.05864  | 0.00000  | 0.08922  | 0.08940  |
| 30 | C2 | DXX | 0.00000  | 0.00000  | 0.01281  | 0.00000  | 0.00000  |
| 31 | C2 | DYY | 0.00000  | 0.00000  | -0.36109 | 0.00000  | 0.00000  |
| 32 | C2 | DZZ | 0.00000  | 0.00000  | 0.44815  | 0.00000  | 0.00000  |
| 33 | C2 | DXY | 0.00000  | 0.00000  | 0.22441  | 0.00000  | 0.00000  |
| 34 | C2 | DXZ | 0.03496  | 0.07806  | 0.00000  | -0.01410 | 0.01289  |

|    |    |     |          |          |          |          |          |
|----|----|-----|----------|----------|----------|----------|----------|
| 35 | C2 | DYZ | -0.02226 | -0.16727 | 0.00000  | 0.37430  | 0.41282  |
| 36 | C3 | S   | 0.00000  | 0.00000  | -0.01666 | 0.00000  | 0.00000  |
| 37 | C3 | S   | 0.00000  | 0.00000  | -0.41525 | 0.00000  | 0.00000  |
| 38 | C3 | PX  | 0.00000  | 0.00000  | -0.08909 | 0.00000  | 0.00000  |
| 39 | C3 | PY  | 0.00000  | 0.00000  | -0.22276 | 0.00000  | 0.00000  |
| 40 | C3 | PZ  | -0.00715 | -0.04010 | 0.00000  | 0.11091  | 0.00534  |
| 41 | C3 | S   | 0.00000  | 0.00000  | 2.01275  | 0.00000  | 0.00000  |
| 42 | C3 | PX  | 0.00000  | 0.00000  | -2.29225 | 0.00000  | 0.00000  |
| 43 | C3 | PY  | 0.00000  | 0.00000  | -0.55732 | 0.00000  | 0.00000  |
| 44 | C3 | PZ  | -0.00133 | -0.12949 | 0.00000  | 0.01900  | -0.07404 |
| 45 | C3 | DXX | 0.00000  | 0.00000  | 0.06478  | 0.00000  | 0.00000  |
| 46 | C3 | DYY | 0.00000  | 0.00000  | -0.02038 | 0.00000  | 0.00000  |
| 47 | C3 | DZZ | 0.00000  | 0.00000  | -0.10395 | 0.00000  | 0.00000  |
| 48 | C3 | DXY | 0.00000  | 0.00000  | -0.06751 | 0.00000  | 0.00000  |
| 49 | C3 | DXZ | 0.51114  | 0.25624  | 0.00000  | 0.32824  | 0.12430  |
| 50 | C3 | DYZ | -0.22581 | 0.37128  | 0.00000  | -0.19019 | 0.41583  |
| 51 | C4 | S   | 0.00000  | 0.00000  | -0.02281 | 0.00000  | 0.00000  |
| 52 | C4 | S   | 0.00000  | 0.00000  | -0.11859 | 0.00000  | 0.00000  |
| 53 | C4 | PX  | 0.00000  | 0.00000  | -0.20204 | 0.00000  | 0.00000  |
| 54 | C4 | PY  | 0.00000  | 0.00000  | 0.12735  | 0.00000  | 0.00000  |
| 55 | C4 | PZ  | -0.01595 | -0.00370 | 0.00000  | -0.07936 | -0.09674 |
| 56 | C4 | S   | 0.00000  | 0.00000  | 0.84840  | 0.00000  | 0.00000  |
| 57 | C4 | PX  | 0.00000  | 0.00000  | 0.48953  | 0.00000  | 0.00000  |
| 58 | C4 | PY  | 0.00000  | 0.00000  | -0.96939 | 0.00000  | 0.00000  |
| 59 | C4 | PZ  | -0.05145 | 0.05489  | 0.00000  | -0.10446 | -0.06898 |
| 60 | C4 | DXX | 0.00000  | 0.00000  | 0.22082  | 0.00000  | 0.00000  |
| 61 | C4 | DYY | 0.00000  | 0.00000  | -0.05502 | 0.00000  | 0.00000  |
| 62 | C4 | DZZ | 0.00000  | 0.00000  | -0.16007 | 0.00000  | 0.00000  |
| 63 | C4 | DXY | 0.00000  | 0.00000  | -0.11156 | 0.00000  | 0.00000  |
| 64 | C4 | DXZ | 0.12894  | 0.35364  | 0.00000  | -0.15512 | -0.03353 |
| 65 | C4 | DYZ | -0.02468 | -0.17800 | 0.00000  | 0.15777  | 0.04919  |
| 66 | C5 | S   | 0.00000  | 0.00000  | 0.02173  | 0.00000  | 0.00000  |
| 67 | C5 | S   | 0.00000  | 0.00000  | 0.03183  | 0.00000  | 0.00000  |
| 68 | C5 | PX  | 0.00000  | 0.00000  | -0.14612 | 0.00000  | 0.00000  |
| 69 | C5 | PY  | 0.00000  | 0.00000  | -0.10354 | 0.00000  | 0.00000  |
| 70 | C5 | PZ  | 0.01065  | 0.04800  | 0.00000  | -0.07214 | -0.06524 |
| 71 | C5 | S   | 0.00000  | 0.00000  | -0.69980 | 0.00000  | 0.00000  |
| 72 | C5 | PX  | 0.00000  | 0.00000  | 0.40099  | 0.00000  | 0.00000  |
| 73 | C5 | PY  | 0.00000  | 0.00000  | 0.92561  | 0.00000  | 0.00000  |
| 74 | C5 | PZ  | 0.03717  | 0.01911  | 0.00000  | -0.08744 | -0.07857 |
| 75 | C5 | DXX | 0.00000  | 0.00000  | -0.23655 | 0.00000  | 0.00000  |
| 76 | C5 | DYY | 0.00000  | 0.00000  | 0.07217  | 0.00000  | 0.00000  |
| 77 | C5 | DZZ | 0.00000  | 0.00000  | 0.14360  | 0.00000  | 0.00000  |
| 78 | C5 | DXY | 0.00000  | 0.00000  | -0.24149 | 0.00000  | 0.00000  |
| 79 | C5 | DXZ | 0.14037  | 0.21016  | 0.00000  | 0.24557  | 0.34323  |
| 80 | C5 | DYZ | 0.05148  | 0.06897  | 0.00000  | 0.21756  | 0.24888  |
| 81 | C6 | S   | 0.00000  | 0.00000  | 0.01033  | 0.00000  | 0.00000  |
| 82 | C6 | S   | 0.00000  | 0.00000  | 0.26784  | 0.00000  | 0.00000  |
| 83 | C6 | PX  | 0.00000  | 0.00000  | -0.12286 | 0.00000  | 0.00000  |
| 84 | C6 | PY  | 0.00000  | 0.00000  | 0.30452  | 0.00000  | 0.00000  |
| 85 | C6 | PZ  | 0.03768  | -0.02035 | 0.00000  | 0.12206  | 0.04422  |
| 86 | C6 | S   | 0.00000  | 0.00000  | -1.18067 | 0.00000  | 0.00000  |
| 87 | C6 | PX  | 0.00000  | 0.00000  | -2.56225 | 0.00000  | 0.00000  |
| 88 | C6 | PY  | 0.00000  | 0.00000  | 0.22096  | 0.00000  | 0.00000  |

|     |    |     |          |          |          |          |          |
|-----|----|-----|----------|----------|----------|----------|----------|
| 89  | C6 | PZ  | 0.05501  | -0.02163 | 0.00000  | 0.15057  | 0.06500  |
| 90  | C6 | DXX | 0.00000  | 0.00000  | 0.03671  | 0.00000  | 0.00000  |
| 91  | C6 | DYY | 0.00000  | 0.00000  | -0.06247 | 0.00000  | 0.00000  |
| 92  | C6 | DZZ | 0.00000  | 0.00000  | 0.05467  | 0.00000  | 0.00000  |
| 93  | C6 | DXY | 0.00000  | 0.00000  | -0.08074 | 0.00000  | 0.00000  |
| 94  | C6 | DXZ | 0.40408  | 0.43683  | 0.00000  | -0.12382 | 0.06066  |
| 95  | C6 | DYZ | 0.05399  | -0.09786 | 0.00000  | -0.23301 | 0.05364  |
| 96  | C7 | S   | 0.00000  | 0.00000  | 0.00705  | 0.00000  | 0.00000  |
| 97  | C7 | S   | 0.00000  | 0.00000  | 0.06385  | 0.00000  | 0.00000  |
| 98  | C7 | PX  | 0.00000  | 0.00000  | 0.04754  | 0.00000  | 0.00000  |
| 99  | C7 | PY  | 0.00000  | 0.00000  | -0.04688 | 0.00000  | 0.00000  |
| 100 | C7 | PZ  | -0.11001 | 0.09305  | 0.00000  | -0.01461 | 0.06087  |
| 101 | C7 | S   | 0.00000  | 0.00000  | -0.71747 | 0.00000  | 0.00000  |
| 102 | C7 | PX  | 0.00000  | 0.00000  | 0.97659  | 0.00000  | 0.00000  |
| 103 | C7 | PY  | 0.00000  | 0.00000  | 0.29625  | 0.00000  | 0.00000  |
| 104 | C7 | PZ  | -0.15505 | 0.19656  | 0.00000  | -0.02536 | 0.09791  |
| 105 | C7 | DXX | 0.00000  | 0.00000  | -0.26008 | 0.00000  | 0.00000  |
| 106 | C7 | DYY | 0.00000  | 0.00000  | 0.18029  | 0.00000  | 0.00000  |
| 107 | C7 | DZZ | 0.00000  | 0.00000  | 0.09879  | 0.00000  | 0.00000  |
| 108 | C7 | DXY | 0.00000  | 0.00000  | 0.13087  | 0.00000  | 0.00000  |
| 109 | C7 | DXZ | 0.12403  | 0.09388  | 0.00000  | -0.12163 | 0.13682  |
| 110 | C7 | DYZ | -0.03786 | 0.14339  | 0.00000  | -0.51171 | 0.23884  |
| 111 | H3 | S   | 0.00000  | 0.00000  | 0.11999  | 0.00000  | 0.00000  |
| 112 | H3 | S   | 0.00000  | 0.00000  | 0.14065  | 0.00000  | 0.00000  |
| 113 | H3 | PX  | 0.00000  | 0.00000  | -0.12308 | 0.00000  | 0.00000  |
| 114 | H3 | PY  | 0.00000  | 0.00000  | 0.14389  | 0.00000  | 0.00000  |
| 115 | H3 | PZ  | 0.02575  | -0.03140 | 0.00000  | 0.09579  | 0.15598  |
| 116 | H4 | S   | 0.00000  | 0.00000  | -0.18521 | 0.00000  | 0.00000  |
| 117 | H4 | S   | 0.00000  | 0.00000  | -0.08750 | 0.00000  | 0.00000  |
| 118 | H4 | PX  | 0.00000  | 0.00000  | -0.09312 | 0.00000  | 0.00000  |
| 119 | H4 | PY  | 0.00000  | 0.00000  | -0.20514 | 0.00000  | 0.00000  |
| 120 | H4 | PZ  | -0.00711 | -0.03715 | 0.00000  | 0.08889  | 0.08523  |
| 121 | N1 | S   | 0.00000  | 0.00000  | -0.00556 | 0.00000  | 0.00000  |
| 122 | N1 | S   | 0.00000  | 0.00000  | -0.00709 | 0.00000  | 0.00000  |
| 123 | N1 | PX  | 0.00000  | 0.00000  | 0.00958  | 0.00000  | 0.00000  |
| 124 | N1 | PY  | 0.00000  | 0.00000  | 0.09159  | 0.00000  | 0.00000  |
| 125 | N1 | PZ  | 0.01438  | -0.00252 | 0.00000  | -0.00764 | 0.00987  |
| 126 | N1 | S   | 0.00000  | 0.00000  | 0.07861  | 0.00000  | 0.00000  |
| 127 | N1 | PX  | 0.00000  | 0.00000  | 0.64376  | 0.00000  | 0.00000  |
| 128 | N1 | PY  | 0.00000  | 0.00000  | -0.60885 | 0.00000  | 0.00000  |
| 129 | N1 | PZ  | 0.17542  | 0.11209  | 0.00000  | -0.15096 | -0.09936 |
| 130 | N1 | DXX | 0.00000  | 0.00000  | 0.36798  | 0.00000  | 0.00000  |
| 131 | N1 | DYY | 0.00000  | 0.00000  | -0.13095 | 0.00000  | 0.00000  |
| 132 | N1 | DZZ | 0.00000  | 0.00000  | -0.17542 | 0.00000  | 0.00000  |
| 133 | N1 | DXY | 0.00000  | 0.00000  | 0.16551  | 0.00000  | 0.00000  |
| 134 | N1 | DXZ | 0.28263  | 0.13766  | 0.00000  | -0.04888 | -0.25885 |
| 135 | N1 | DYZ | -0.22432 | 0.03636  | 0.00000  | -0.40313 | 0.13451  |
| 136 | H6 | S   | 0.00000  | 0.00000  | 0.06500  | 0.00000  | 0.00000  |
| 137 | H6 | S   | 0.00000  | 0.00000  | 0.11852  | 0.00000  | 0.00000  |
| 138 | H6 | PX  | 0.00000  | 0.00000  | 0.00010  | 0.00000  | 0.00000  |
| 139 | H6 | PY  | 0.00000  | 0.00000  | 0.10492  | 0.00000  | 0.00000  |
| 140 | H6 | PZ  | 0.04653  | -0.03751 | 0.00000  | -0.23215 | -0.13815 |
| 141 | C8 | S   | 0.00000  | 0.00000  | -0.00528 | 0.00000  | 0.00000  |
| 142 | C8 | S   | 0.00000  | 0.00000  | -0.15238 | 0.00000  | 0.00000  |



|     |     |     |          |          |          |          |          |
|-----|-----|-----|----------|----------|----------|----------|----------|
| 143 | C8  | PX  | 0.00000  | 0.00000  | 0.10895  | 0.00000  | 0.00000  |
| 144 | C8  | PY  | 0.00000  | 0.00000  | -0.06039 | 0.00000  | 0.00000  |
| 145 | C8  | PZ  | -0.05703 | 0.02684  | 0.00000  | -0.03956 | 0.06299  |
| 146 | C8  | S   | 0.00000  | 0.00000  | 0.29128  | 0.00000  | 0.00000  |
| 147 | C8  | PX  | 0.00000  | 0.00000  | 0.68627  | 0.00000  | 0.00000  |
| 148 | C8  | PY  | 0.00000  | 0.00000  | 0.26474  | 0.00000  | 0.00000  |
| 149 | C8  | PZ  | -0.16443 | -0.00738 | 0.00000  | 0.02903  | -0.02407 |
| 150 | C8  | DXX | 0.00000  | 0.00000  | -0.04054 | 0.00000  | 0.00000  |
| 151 | C8  | DYY | 0.00000  | 0.00000  | 0.02543  | 0.00000  | 0.00000  |
| 152 | C8  | DZZ | 0.00000  | 0.00000  | 0.03006  | 0.00000  | 0.00000  |
| 153 | C8  | DXY | 0.00000  | 0.00000  | 0.12589  | 0.00000  | 0.00000  |
| 154 | C8  | DXZ | 0.59030  | 0.08955  | 0.00000  | -0.15231 | -0.09181 |
| 155 | C8  | DYZ | 0.18479  | -0.36479 | 0.00000  | -0.27673 | 0.33328  |
| 156 | H8  | S   | 0.00000  | 0.00000  | 0.10583  | 0.00000  | 0.00000  |
| 157 | H8  | S   | 0.00000  | 0.00000  | -0.37145 | 0.00000  | 0.00000  |
| 158 | H8  | PX  | 0.00000  | 0.00000  | 0.12595  | 0.00000  | 0.00000  |
| 159 | H8  | PY  | 0.00000  | 0.00000  | -0.02791 | 0.00000  | 0.00000  |
| 160 | H8  | PZ  | 0.26040  | -0.46690 | 0.00000  | -0.07397 | -0.23795 |
| 161 | C10 | S   | 0.00000  | 0.00000  | -0.00085 | 0.00000  | 0.00000  |
| 162 | C10 | S   | 0.00000  | 0.00000  | -0.01124 | 0.00000  | 0.00000  |
| 163 | C10 | PX  | 0.00000  | 0.00000  | -0.01380 | 0.00000  | 0.00000  |
| 164 | C10 | PY  | 0.00000  | 0.00000  | -0.02174 | 0.00000  | 0.00000  |
| 165 | C10 | PZ  | 0.06351  | -0.10196 | 0.00000  | -0.07262 | 0.11280  |
| 166 | C10 | S   | 0.00000  | 0.00000  | 0.13789  | 0.00000  | 0.00000  |
| 167 | C10 | PX  | 0.00000  | 0.00000  | -0.18622 | 0.00000  | 0.00000  |
| 168 | C10 | PY  | 0.00000  | 0.00000  | 0.09473  | 0.00000  | 0.00000  |
| 169 | C10 | PZ  | 0.17192  | -0.16267 | 0.00000  | -0.11133 | 0.15985  |
| 170 | C10 | DXX | 0.00000  | 0.00000  | -0.01454 | 0.00000  | 0.00000  |
| 171 | C10 | DYY | 0.00000  | 0.00000  | 0.02121  | 0.00000  | 0.00000  |
| 172 | C10 | DZZ | 0.00000  | 0.00000  | -0.01975 | 0.00000  | 0.00000  |
| 173 | C10 | DXY | 0.00000  | 0.00000  | -0.14470 | 0.00000  | 0.00000  |
| 174 | C10 | DXZ | 0.07782  | 0.00772  | 0.00000  | -0.03973 | -0.02351 |
| 175 | C10 | DYZ | 0.18327  | -0.11365 | 0.00000  | -0.04373 | -0.06072 |
| 176 | H16 | S   | 0.00000  | 0.00000  | -0.07659 | 0.00000  | 0.00000  |
| 177 | H16 | S   | 0.00000  | 0.00000  | 0.16247  | 0.00000  | 0.00000  |
| 178 | H16 | PX  | 0.00000  | 0.00000  | 0.05113  | 0.00000  | 0.00000  |
| 179 | H16 | PY  | 0.00000  | 0.00000  | 0.15767  | 0.00000  | 0.00000  |
| 180 | H16 | PZ  | -0.32011 | 0.24909  | 0.00000  | 0.25278  | -0.33808 |
| 181 | H18 | S   | 0.00000  | 0.00000  | 0.04937  | 0.00000  | 0.00000  |
| 182 | H18 | S   | 0.00000  | 0.00000  | -0.10386 | 0.00000  | 0.00000  |
| 183 | H18 | PX  | 0.00000  | 0.00000  | 0.02754  | 0.00000  | 0.00000  |
| 184 | H18 | PY  | 0.00000  | 0.00000  | -0.14848 | 0.00000  | 0.00000  |
| 185 | H18 | PZ  | -0.02902 | 0.31855  | 0.00000  | 0.15261  | -0.38947 |

|              |          |          |          |          |          |
|--------------|----------|----------|----------|----------|----------|
| MO:          | 136      | 137      | 138      | 139      | 140      |
| Eigenvalues: | 2.61465  | 2.64801  | 2.68326  | 2.70446  | 2.71343  |
| (ev):        | 71.14828 | 72.05602 | 73.01517 | 73.59204 | 73.83611 |

|   |    | A  | A        | A        | A        | A        |          |
|---|----|----|----------|----------|----------|----------|----------|
| 1 | H1 | S  | -0.09206 | -0.25088 | 0.00000  | -0.08840 | 0.00000  |
| 2 | H1 | S  | 0.19493  | 0.28337  | 0.00000  | 0.06172  | 0.00000  |
| 3 | H1 | PX | -0.11708 | -0.19510 | 0.00000  | 0.07800  | 0.00000  |
| 4 | H1 | PY | 0.14465  | 0.06234  | 0.00000  | -0.21260 | 0.00000  |
| 5 | H1 | PZ | 0.00000  | 0.00000  | -0.11704 | 0.00000  | -0.41877 |

|    |    |     |          |          |          |          |          |
|----|----|-----|----------|----------|----------|----------|----------|
| 6  | C1 | S   | -0.03692 | -0.03252 | 0.00000  | -0.02264 | 0.00000  |
| 7  | C1 | S   | -0.17754 | -0.19199 | 0.00000  | -0.07861 | 0.00000  |
| 8  | C1 | PX  | -0.08620 | -0.12851 | 0.00000  | -0.02648 | 0.00000  |
| 9  | C1 | PY  | -0.10895 | 0.07528  | 0.00000  | 0.03435  | 0.00000  |
| 10 | C1 | PZ  | 0.00000  | 0.00000  | -0.02317 | 0.00000  | 0.08906  |
| 11 | C1 | S   | 1.17478  | 1.47144  | 0.00000  | 1.37082  | 0.00000  |
| 12 | C1 | PX  | -0.51479 | -0.51233 | 0.00000  | -0.27330 | 0.00000  |
| 13 | C1 | PY  | -1.04810 | 0.33824  | 0.00000  | 0.01394  | 0.00000  |
| 14 | C1 | PZ  | 0.00000  | 0.00000  | -0.04034 | 0.00000  | 0.10352  |
| 15 | C1 | DXX | 0.14670  | 0.33758  | 0.00000  | 0.02122  | 0.00000  |
| 16 | C1 | DYY | 0.16207  | -0.11719 | 0.00000  | 0.19067  | 0.00000  |
| 17 | C1 | DZZ | -0.37733 | -0.32251 | 0.00000  | -0.16279 | 0.00000  |
| 18 | C1 | DXY | 0.24754  | -0.02500 | 0.00000  | 0.09412  | 0.00000  |
| 19 | C1 | DXZ | 0.00000  | 0.00000  | 0.14002  | 0.00000  | 0.17718  |
| 20 | C1 | DYZ | 0.00000  | 0.00000  | -0.29975 | 0.00000  | 0.31707  |
| 21 | C2 | S   | -0.03420 | -0.00885 | 0.00000  | 0.00087  | 0.00000  |
| 22 | C2 | S   | -0.38728 | -0.23808 | 0.00000  | 0.02558  | 0.00000  |
| 23 | C2 | PX  | -0.00835 | -0.02266 | 0.00000  | 0.05246  | 0.00000  |
| 24 | C2 | PY  | -0.13875 | 0.00515  | 0.00000  | -0.02196 | 0.00000  |
| 25 | C2 | PZ  | 0.00000  | 0.00000  | 0.09680  | 0.00000  | -0.01636 |
| 26 | C2 | S   | 2.46070  | 1.29304  | 0.00000  | -0.82821 | 0.00000  |
| 27 | C2 | PX  | 1.45002  | 0.63600  | 0.00000  | 0.23888  | 0.00000  |
| 28 | C2 | PY  | -0.76482 | 0.52839  | 0.00000  | -0.39811 | 0.00000  |
| 29 | C2 | PZ  | 0.00000  | 0.00000  | 0.07559  | 0.00000  | -0.01625 |
| 30 | C2 | DXX | 0.12751  | 0.21129  | 0.00000  | 0.01648  | 0.00000  |
| 31 | C2 | DYY | 0.09218  | -0.25571 | 0.00000  | 0.01802  | 0.00000  |
| 32 | C2 | DZZ | -0.20539 | -0.00833 | 0.00000  | -0.05893 | 0.00000  |
| 33 | C2 | DXY | -0.23642 | 0.14156  | 0.00000  | -0.08795 | 0.00000  |
| 34 | C2 | DXZ | 0.00000  | 0.00000  | -0.19892 | 0.00000  | -0.05076 |
| 35 | C2 | DYZ | 0.00000  | 0.00000  | -0.17584 | 0.00000  | 0.14695  |
| 36 | C3 | S   | 0.01412  | -0.01576 | 0.00000  | -0.04053 | 0.00000  |
| 37 | C3 | S   | -0.03108 | 0.03405  | 0.00000  | -0.23874 | 0.00000  |
| 38 | C3 | PX  | 0.03949  | 0.06444  | 0.00000  | -0.10646 | 0.00000  |
| 39 | C3 | PY  | -0.28984 | -0.21388 | 0.00000  | -0.05873 | 0.00000  |
| 40 | C3 | PZ  | 0.00000  | 0.00000  | -0.03095 | 0.00000  | 0.04004  |
| 41 | C3 | S   | 0.43175  | 0.95389  | 0.00000  | 1.39066  | 0.00000  |
| 42 | C3 | PX  | -0.66388 | 0.56320  | 0.00000  | -0.67912 | 0.00000  |
| 43 | C3 | PY  | -1.73162 | -1.25206 | 0.00000  | -1.04298 | 0.00000  |
| 44 | C3 | PZ  | 0.00000  | 0.00000  | -0.01475 | 0.00000  | -0.04548 |
| 45 | C3 | DXX | 0.05738  | 0.16001  | 0.00000  | 0.18318  | 0.00000  |
| 46 | C3 | DYY | -0.07293 | 0.05620  | 0.00000  | 0.06182  | 0.00000  |
| 47 | C3 | DZZ | 0.06065  | -0.11470 | 0.00000  | -0.29726 | 0.00000  |
| 48 | C3 | DXY | -0.14085 | -0.02089 | 0.00000  | -0.17911 | 0.00000  |
| 49 | C3 | DXZ | 0.00000  | 0.00000  | 0.06658  | 0.00000  | -0.09623 |
| 50 | C3 | DYZ | 0.00000  | 0.00000  | -0.09551 | 0.00000  | 0.19569  |
| 51 | C4 | S   | -0.00585 | 0.00533  | 0.00000  | -0.02168 | 0.00000  |
| 52 | C4 | S   | -0.08371 | -0.03233 | 0.00000  | -0.01223 | 0.00000  |
| 53 | C4 | PX  | -0.00698 | 0.02249  | 0.00000  | -0.19518 | 0.00000  |
| 54 | C4 | PY  | 0.05442  | 0.10026  | 0.00000  | 0.02679  | 0.00000  |
| 55 | C4 | PZ  | 0.00000  | 0.00000  | 0.07986  | 0.00000  | 0.03600  |
| 56 | C4 | S   | 0.78756  | -0.48513 | 0.00000  | 0.52772  | 0.00000  |
| 57 | C4 | PX  | 0.18403  | -0.89441 | 0.00000  | -0.81419 | 0.00000  |
| 58 | C4 | PY  | -0.29582 | 0.23931  | 0.00000  | 0.50646  | 0.00000  |
| 59 | C4 | PZ  | 0.00000  | 0.00000  | 0.07964  | 0.00000  | 0.01630  |

|     |    |     |          |          |          |          |          |
|-----|----|-----|----------|----------|----------|----------|----------|
| 60  | C4 | DXX | 0.00243  | 0.06691  | 0.00000  | 0.28686  | 0.00000  |
| 61  | C4 | DYY | -0.02774 | -0.16205 | 0.00000  | -0.16292 | 0.00000  |
| 62  | C4 | DZZ | 0.06076  | 0.12809  | 0.00000  | -0.15866 | 0.00000  |
| 63  | C4 | DXY | 0.00653  | 0.01150  | 0.00000  | 0.15462  | 0.00000  |
| 64  | C4 | DXZ | 0.00000  | 0.00000  | 0.37087  | 0.00000  | -0.12311 |
| 65  | C4 | DYZ | 0.00000  | 0.00000  | -0.01564 | 0.00000  | 0.45216  |
| 66  | C5 | S   | -0.00669 | 0.01643  | 0.00000  | 0.02150  | 0.00000  |
| 67  | C5 | S   | 0.18391  | 0.25496  | 0.00000  | -0.05821 | 0.00000  |
| 68  | C5 | PX  | 0.06035  | -0.07371 | 0.00000  | -0.12538 | 0.00000  |
| 69  | C5 | PY  | -0.03672 | -0.02326 | 0.00000  | 0.02490  | 0.00000  |
| 70  | C5 | PZ  | 0.00000  | 0.00000  | 0.10815  | 0.00000  | 0.00558  |
| 71  | C5 | S   | -0.69566 | -1.73806 | 0.00000  | -0.37698 | 0.00000  |
| 72  | C5 | PX  | -0.59483 | -0.02037 | 0.00000  | -1.05266 | 0.00000  |
| 73  | C5 | PY  | 0.62978  | 0.59455  | 0.00000  | -0.59731 | 0.00000  |
| 74  | C5 | PZ  | 0.00000  | 0.00000  | 0.05773  | 0.00000  | 0.03510  |
| 75  | C5 | DXX | 0.08059  | -0.01073 | 0.00000  | -0.23735 | 0.00000  |
| 76  | C5 | DYY | -0.03768 | -0.10552 | 0.00000  | 0.08194  | 0.00000  |
| 77  | C5 | DZZ | -0.08370 | 0.10205  | 0.00000  | 0.19398  | 0.00000  |
| 78  | C5 | DXY | 0.05249  | 0.16438  | 0.00000  | -0.02018 | 0.00000  |
| 79  | C5 | DXZ | 0.00000  | 0.00000  | -0.01984 | 0.00000  | -0.18050 |
| 80  | C5 | DYZ | 0.00000  | 0.00000  | 0.22190  | 0.00000  | 0.18965  |
| 81  | C6 | S   | 0.00150  | -0.04089 | 0.00000  | 0.04185  | 0.00000  |
| 82  | C6 | S   | 0.08275  | -0.25181 | 0.00000  | 0.26334  | 0.00000  |
| 83  | C6 | PX  | -0.05032 | -0.16567 | 0.00000  | -0.05627 | 0.00000  |
| 84  | C6 | PY  | -0.12817 | 0.18178  | 0.00000  | -0.17544 | 0.00000  |
| 85  | C6 | PZ  | 0.00000  | 0.00000  | 0.04903  | 0.00000  | -0.04708 |
| 86  | C6 | S   | -1.12585 | 0.54185  | 0.00000  | -1.11792 | 0.00000  |
| 87  | C6 | PX  | 0.50935  | 0.23886  | 0.00000  | -0.87857 | 0.00000  |
| 88  | C6 | PY  | -1.97624 | -0.52710 | 0.00000  | 0.05899  | 0.00000  |
| 89  | C6 | PZ  | 0.00000  | 0.00000  | 0.06809  | 0.00000  | -0.06340 |
| 90  | C6 | DXX | -0.00364 | 0.01886  | 0.00000  | -0.21037 | 0.00000  |
| 91  | C6 | DYY | 0.05376  | 0.20638  | 0.00000  | -0.02565 | 0.00000  |
| 92  | C6 | DZZ | -0.19118 | -0.27908 | 0.00000  | 0.26220  | 0.00000  |
| 93  | C6 | DXY | 0.20349  | 0.05876  | 0.00000  | -0.00424 | 0.00000  |
| 94  | C6 | DXZ | 0.00000  | 0.00000  | 0.13624  | 0.00000  | -0.08953 |
| 95  | C6 | DYZ | 0.00000  | 0.00000  | -0.33636 | 0.00000  | 0.31243  |
| 96  | C7 | S   | 0.06646  | 0.01851  | 0.00000  | -0.05602 | 0.00000  |
| 97  | C7 | S   | 0.53837  | 0.15280  | 0.00000  | -0.31054 | 0.00000  |
| 98  | C7 | PX  | 0.05854  | -0.10026 | 0.00000  | -0.08097 | 0.00000  |
| 99  | C7 | PY  | -0.09486 | -0.16758 | 0.00000  | -0.29922 | 0.00000  |
| 100 | C7 | PZ  | 0.00000  | 0.00000  | -0.01205 | 0.00000  | 0.04490  |
| 101 | C7 | S   | -3.23497 | -0.61543 | 0.00000  | 1.11071  | 0.00000  |
| 102 | C7 | PX  | 1.84783  | -0.22212 | 0.00000  | -0.66083 | 0.00000  |
| 103 | C7 | PY  | -0.57815 | -1.39467 | 0.00000  | -0.91919 | 0.00000  |
| 104 | C7 | PZ  | 0.00000  | 0.00000  | -0.03867 | 0.00000  | 0.08431  |
| 105 | C7 | DXX | -0.30280 | 0.19510  | 0.00000  | 0.24090  | 0.00000  |
| 106 | C7 | DYY | -0.16183 | -0.34548 | 0.00000  | 0.09636  | 0.00000  |
| 107 | C7 | DZZ | 0.57237  | 0.21706  | 0.00000  | -0.44906 | 0.00000  |
| 108 | C7 | DXY | 0.12771  | 0.24901  | 0.00000  | 0.37722  | 0.00000  |
| 109 | C7 | DXZ | 0.00000  | 0.00000  | -0.08143 | 0.00000  | 0.18946  |
| 110 | C7 | DYZ | 0.00000  | 0.00000  | -0.08347 | 0.00000  | 0.13420  |
| 111 | H3 | S   | -0.00854 | 0.12381  | 0.00000  | -0.07845 | 0.00000  |
| 112 | H3 | S   | 0.02774  | 0.04368  | 0.00000  | -0.04898 | 0.00000  |
| 113 | H3 | PX  | -0.11012 | 0.38307  | 0.00000  | -0.03131 | 0.00000  |

|     |     |     |          |          |          |          |          |
|-----|-----|-----|----------|----------|----------|----------|----------|
| 114 | H3  | PY  | 0.11773  | -0.09853 | 0.00000  | 0.00823  | 0.00000  |
| 115 | H3  | PZ  | 0.00000  | 0.00000  | -0.34926 | 0.00000  | -0.52580 |
| 116 | H4  | S   | -0.06628 | 0.15601  | 0.00000  | 0.02656  | 0.00000  |
| 117 | H4  | S   | -0.23820 | -0.17784 | 0.00000  | 0.02732  | 0.00000  |
| 118 | H4  | PX  | 0.15511  | -0.22871 | 0.00000  | 0.27370  | 0.00000  |
| 119 | H4  | PY  | 0.12606  | -0.04689 | 0.00000  | 0.16225  | 0.00000  |
| 120 | H4  | PZ  | 0.00000  | 0.00000  | -0.45584 | 0.00000  | -0.36233 |
| 121 | N1  | S   | 0.01604  | -0.01205 | 0.00000  | 0.03130  | 0.00000  |
| 122 | N1  | S   | 0.28868  | -0.28323 | 0.00000  | 0.53464  | 0.00000  |
| 123 | N1  | PX  | -0.00493 | -0.03443 | 0.00000  | 0.03385  | 0.00000  |
| 124 | N1  | PY  | -0.18940 | -0.15470 | 0.00000  | 0.04155  | 0.00000  |
| 125 | N1  | PZ  | 0.00000  | 0.00000  | 0.00106  | 0.00000  | 0.00422  |
| 126 | N1  | S   | -1.49822 | 0.45830  | 0.00000  | -1.60388 | 0.00000  |
| 127 | N1  | PX  | -0.64756 | 0.34532  | 0.00000  | -0.44114 | 0.00000  |
| 128 | N1  | PY  | -0.26016 | 0.17271  | 0.00000  | 0.13320  | 0.00000  |
| 129 | N1  | PZ  | 0.00000  | 0.00000  | -0.20641 | 0.00000  | 0.17005  |
| 130 | N1  | DXX | -0.30268 | 0.18835  | 0.00000  | -0.12110 | 0.00000  |
| 131 | N1  | DYY | 0.04876  | -0.03640 | 0.00000  | -0.17841 | 0.00000  |
| 132 | N1  | DZZ | 0.22093  | -0.21662 | 0.00000  | 0.35398  | 0.00000  |
| 133 | N1  | DXY | -0.05321 | 0.05224  | 0.00000  | 0.14733  | 0.00000  |
| 134 | N1  | DXZ | 0.00000  | 0.00000  | -0.35963 | 0.00000  | 0.27251  |
| 135 | N1  | DYZ | 0.00000  | 0.00000  | -0.10636 | 0.00000  | 0.13749  |
| 136 | H6  | S   | 0.00894  | -0.11712 | 0.00000  | 0.09631  | 0.00000  |
| 137 | H6  | S   | 0.35563  | 0.27300  | 0.00000  | 0.10484  | 0.00000  |
| 138 | H6  | PX  | 0.03440  | 0.12657  | 0.00000  | 0.06755  | 0.00000  |
| 139 | H6  | PY  | 0.02180  | -0.09204 | 0.00000  | 0.09041  | 0.00000  |
| 140 | H6  | PZ  | 0.00000  | 0.00000  | -0.46890 | 0.00000  | -0.02809 |
| 141 | C8  | S   | 0.00379  | 0.02905  | 0.00000  | 0.03256  | 0.00000  |
| 142 | C8  | S   | 0.11219  | 0.17125  | 0.00000  | 0.21766  | 0.00000  |
| 143 | C8  | PX  | -0.01278 | -0.01867 | 0.00000  | -0.35182 | 0.00000  |
| 144 | C8  | PY  | 0.48011  | -0.19099 | 0.00000  | 0.02018  | 0.00000  |
| 145 | C8  | PZ  | 0.00000  | 0.00000  | 0.04253  | 0.00000  | -0.00909 |
| 146 | C8  | S   | 0.21694  | -0.01755 | 0.00000  | -0.86443 | 0.00000  |
| 147 | C8  | PX  | 0.86154  | -0.67616 | 0.00000  | -1.70817 | 0.00000  |
| 148 | C8  | PY  | 1.17511  | -1.91425 | 0.00000  | -0.16588 | 0.00000  |
| 149 | C8  | PZ  | 0.00000  | 0.00000  | 0.07206  | 0.00000  | -0.06726 |
| 150 | C8  | DXX | -0.08392 | -0.17401 | 0.00000  | -0.24546 | 0.00000  |
| 151 | C8  | DYY | -0.09239 | 0.06719  | 0.00000  | 0.00436  | 0.00000  |
| 152 | C8  | DZZ | 0.08676  | 0.20041  | 0.00000  | 0.23982  | 0.00000  |
| 153 | C8  | DXY | 0.06275  | -0.06662 | 0.00000  | -0.20400 | 0.00000  |
| 154 | C8  | DXZ | 0.00000  | 0.00000  | -0.20092 | 0.00000  | 0.17058  |
| 155 | C8  | DYZ | 0.00000  | 0.00000  | 0.08220  | 0.00000  | -0.01544 |
| 156 | H8  | S   | 0.15711  | -0.00229 | 0.00000  | -0.07922 | 0.00000  |
| 157 | H8  | S   | -0.64405 | -0.07421 | 0.00000  | 0.06641  | 0.00000  |
| 158 | H8  | PX  | 0.16779  | 0.14920  | 0.00000  | 0.04767  | 0.00000  |
| 159 | H8  | PY  | -0.06119 | 0.27364  | 0.00000  | 0.19302  | 0.00000  |
| 160 | H8  | PZ  | 0.00000  | 0.00000  | 0.10368  | 0.00000  | -0.26763 |
| 161 | C10 | S   | -0.04215 | 0.03573  | 0.00000  | -0.00380 | 0.00000  |
| 162 | C10 | S   | -0.18499 | 0.13951  | 0.00000  | -0.01127 | 0.00000  |
| 163 | C10 | PX  | 0.01598  | 0.02293  | 0.00000  | 0.11245  | 0.00000  |
| 164 | C10 | PY  | 0.15744  | -0.11772 | 0.00000  | 0.04355  | 0.00000  |
| 165 | C10 | PZ  | 0.00000  | 0.00000  | 0.04001  | 0.00000  | -0.00579 |
| 166 | C10 | S   | 1.50496  | -1.90112 | 0.00000  | 0.11564  | 0.00000  |
| 167 | C10 | PX  | -0.35932 | 0.03218  | 0.00000  | 0.73954  | 0.00000  |

|     |     |     |          |          |          |          |          |
|-----|-----|-----|----------|----------|----------|----------|----------|
| 168 | C10 | PY  | 0.86383  | -1.01612 | 0.00000  | -0.13294 | 0.00000  |
| 169 | C10 | PZ  | 0.00000  | 0.00000  | 0.04393  | 0.00000  | -0.00095 |
| 170 | C10 | DXX | -0.05676 | 0.03225  | 0.00000  | -0.00204 | 0.00000  |
| 171 | C10 | DYY | 0.43259  | -0.27831 | 0.00000  | 0.00307  | 0.00000  |
| 172 | C10 | DZZ | -0.48699 | 0.30718  | 0.00000  | -0.05968 | 0.00000  |
| 173 | C10 | DXY | -0.00133 | 0.06890  | 0.00000  | 0.30814  | 0.00000  |
| 174 | C10 | DXZ | 0.00000  | 0.00000  | -0.09883 | 0.00000  | 0.10578  |
| 175 | C10 | DYZ | 0.00000  | 0.00000  | -0.12299 | 0.00000  | 0.03998  |
| 176 | H16 | S   | -0.05945 | 0.14256  | 0.00000  | 0.04006  | 0.00000  |
| 177 | H16 | S   | 0.22526  | -0.20011 | 0.00000  | -0.45350 | 0.00000  |
| 178 | H16 | PX  | -0.11975 | 0.04621  | 0.00000  | -0.00107 | 0.00000  |
| 179 | H16 | PY  | -0.03603 | -0.01734 | 0.00000  | -0.17392 | 0.00000  |
| 180 | H16 | PZ  | 0.00000  | 0.00000  | -0.08143 | 0.00000  | -0.06377 |
| 181 | H18 | S   | -0.12373 | 0.04471  | 0.00000  | -0.03018 | 0.00000  |
| 182 | H18 | S   | -0.09542 | -0.01667 | 0.00000  | 0.30977  | 0.00000  |
| 183 | H18 | PX  | 0.09912  | -0.05610 | 0.00000  | 0.05884  | 0.00000  |
| 184 | H18 | PY  | -0.08305 | 0.14605  | 0.00000  | 0.29543  | 0.00000  |
| 185 | H18 | PZ  | 0.00000  | 0.00000  | -0.28515 | 0.00000  | 0.15609  |

|              |          |          |          |          |          |
|--------------|----------|----------|----------|----------|----------|
| MO:          | 141      | 142      | 143      | 144      | 145      |
| Eigenvalues: | 2.72800  | 2.73003  | 2.74124  | 2.80231  | 2.80292  |
| (ev):        | 74.23264 | 74.28780 | 74.59310 | 76.25478 | 76.27139 |

|    |    |     |          |          |          |          |          |
|----|----|-----|----------|----------|----------|----------|----------|
|    |    | A   | A        | A        | A        | A        |          |
| 1  | H1 | S   | 0.07951  | 0.00000  | 0.00941  | 0.00000  | 0.05690  |
| 2  | H1 | S   | -0.22101 | 0.00000  | -0.12936 | 0.00000  | 0.16581  |
| 3  | H1 | PX  | 0.14472  | 0.00000  | 0.12504  | 0.00000  | -0.00788 |
| 4  | H1 | PY  | 0.05354  | 0.00000  | 0.22061  | 0.00000  | -0.44815 |
| 5  | H1 | PZ  | 0.00000  | 0.44587  | 0.00000  | 0.15800  | 0.00000  |
| 6  | C1 | S   | 0.00012  | 0.00000  | 0.00666  | 0.00000  | 0.00846  |
| 7  | C1 | S   | 0.33103  | 0.00000  | -0.08909 | 0.00000  | 0.02845  |
| 8  | C1 | PX  | -0.05826 | 0.00000  | 0.20044  | 0.00000  | -0.05718 |
| 9  | C1 | PY  | 0.03976  | 0.00000  | -0.16372 | 0.00000  | 0.18510  |
| 10 | C1 | PZ  | 0.00000  | -0.02550 | 0.00000  | -0.03798 | 0.00000  |
| 11 | C1 | S   | -0.87578 | 0.00000  | 0.41085  | 0.00000  | -0.30726 |
| 12 | C1 | PX  | 0.54749  | 0.00000  | 0.23894  | 0.00000  | -0.39225 |
| 13 | C1 | PY  | -0.38709 | 0.00000  | -0.89007 | 0.00000  | 1.03366  |
| 14 | C1 | PZ  | 0.00000  | -0.06795 | 0.00000  | -0.05023 | 0.00000  |
| 15 | C1 | DXX | -0.18810 | 0.00000  | -0.12130 | 0.00000  | 0.06113  |
| 16 | C1 | DYY | 0.27594  | 0.00000  | 0.00275  | 0.00000  | 0.00391  |
| 17 | C1 | DZZ | -0.03703 | 0.00000  | 0.15248  | 0.00000  | 0.00161  |
| 18 | C1 | DXY | 0.01032  | 0.00000  | 0.11040  | 0.00000  | -0.03098 |
| 19 | C1 | DXZ | 0.00000  | -0.30058 | 0.00000  | -0.08709 | 0.00000  |
| 20 | C1 | DYZ | 0.00000  | 0.06428  | 0.00000  | 0.03195  | 0.00000  |
| 21 | C2 | S   | 0.02492  | 0.00000  | -0.00904 | 0.00000  | -0.03735 |
| 22 | C2 | S   | 0.24398  | 0.00000  | -0.15362 | 0.00000  | 0.04382  |
| 23 | C2 | PX  | -0.00846 | 0.00000  | 0.09906  | 0.00000  | 0.27581  |
| 24 | C2 | PY  | 0.02129  | 0.00000  | 0.05206  | 0.00000  | 0.38836  |
| 25 | C2 | PZ  | 0.00000  | 0.03237  | 0.00000  | 0.02993  | 0.00000  |
| 26 | C2 | S   | -1.12159 | 0.00000  | 0.24962  | 0.00000  | 1.46243  |
| 27 | C2 | PX  | -0.26596 | 0.00000  | 0.41065  | 0.00000  | 0.29138  |
| 28 | C2 | PY  | 0.71335  | 0.00000  | 0.38125  | 0.00000  | 2.09176  |
| 29 | C2 | PZ  | 0.00000  | 0.07224  | 0.00000  | 0.03870  | 0.00000  |
| 30 | C2 | DXX | -0.14912 | 0.00000  | 0.18666  | 0.00000  | 0.17248  |

|    |    |     |          |          |          |          |          |
|----|----|-----|----------|----------|----------|----------|----------|
| 31 | C2 | DYY | 0.04720  | 0.00000  | -0.17479 | 0.00000  | 0.22050  |
| 32 | C2 | DZZ | 0.21501  | 0.00000  | -0.12150 | 0.00000  | -0.41272 |
| 33 | C2 | DXY | 0.00954  | 0.00000  | 0.11861  | 0.00000  | 0.31598  |
| 34 | C2 | DXZ | 0.00000  | -0.31434 | 0.00000  | 0.04431  | 0.00000  |
| 35 | C2 | DYZ | 0.00000  | 0.02044  | 0.00000  | 0.29577  | 0.00000  |
| 36 | C3 | S   | 0.00109  | 0.00000  | 0.00444  | 0.00000  | -0.00809 |
| 37 | C3 | S   | 0.02857  | 0.00000  | -0.02435 | 0.00000  | -0.13041 |
| 38 | C3 | PX  | -0.11174 | 0.00000  | -0.04534 | 0.00000  | 0.02669  |
| 39 | C3 | PY  | -0.14863 | 0.00000  | 0.21546  | 0.00000  | 0.03722  |
| 40 | C3 | PZ  | 0.00000  | -0.02964 | 0.00000  | -0.05079 | 0.00000  |
| 41 | C3 | S   | 0.76155  | 0.00000  | 0.85078  | 0.00000  | 1.14407  |
| 42 | C3 | PX  | -0.02944 | 0.00000  | -1.28556 | 0.00000  | 1.07016  |
| 43 | C3 | PY  | -0.61299 | 0.00000  | -1.72428 | 0.00000  | -0.03209 |
| 44 | C3 | PZ  | 0.00000  | 0.08268  | 0.00000  | 0.04556  | 0.00000  |
| 45 | C3 | DXX | 0.06765  | 0.00000  | 0.07073  | 0.00000  | -0.16960 |
| 46 | C3 | DYY | -0.06780 | 0.00000  | -0.16050 | 0.00000  | 0.18259  |
| 47 | C3 | DZZ | 0.06953  | 0.00000  | 0.07691  | 0.00000  | -0.05076 |
| 48 | C3 | DXY | -0.05549 | 0.00000  | 0.17597  | 0.00000  | 0.12019  |
| 49 | C3 | DXZ | 0.00000  | -0.18436 | 0.00000  | 0.12202  | 0.00000  |
| 50 | C3 | DYZ | 0.00000  | 0.06573  | 0.00000  | 0.10945  | 0.00000  |
| 51 | C4 | S   | -0.02196 | 0.00000  | -0.07218 | 0.00000  | 0.02873  |
| 52 | C4 | S   | -0.41984 | 0.00000  | -0.27853 | 0.00000  | 0.06612  |
| 53 | C4 | PX  | -0.12417 | 0.00000  | -0.14353 | 0.00000  | -0.08635 |
| 54 | C4 | PY  | 0.04541  | 0.00000  | -0.21440 | 0.00000  | 0.04641  |
| 55 | C4 | PZ  | 0.00000  | -0.04182 | 0.00000  | -0.01725 | 0.00000  |
| 56 | C4 | S   | 1.86832  | 0.00000  | 2.64223  | 0.00000  | -1.64901 |
| 57 | C4 | PX  | -0.29552 | 0.00000  | -0.89041 | 0.00000  | 0.20561  |
| 58 | C4 | PY  | -0.79401 | 0.00000  | -0.73911 | 0.00000  | -0.01802 |
| 59 | C4 | PZ  | 0.00000  | -0.03483 | 0.00000  | 0.00979  | 0.00000  |
| 60 | C4 | DXX | 0.01671  | 0.00000  | 0.26047  | 0.00000  | 0.00112  |
| 61 | C4 | DYY | 0.06110  | 0.00000  | 0.25221  | 0.00000  | -0.18875 |
| 62 | C4 | DZZ | -0.12672 | 0.00000  | -0.63768 | 0.00000  | 0.20128  |
| 63 | C4 | DXY | 0.32043  | 0.00000  | 0.06615  | 0.00000  | 0.22680  |
| 64 | C4 | DXZ | 0.00000  | -0.21925 | 0.00000  | 0.12739  | 0.00000  |
| 65 | C4 | DYZ | 0.00000  | -0.07930 | 0.00000  | 0.02453  | 0.00000  |
| 66 | C5 | S   | 0.02189  | 0.00000  | 0.05951  | 0.00000  | 0.04656  |
| 67 | C5 | S   | 0.20435  | 0.00000  | 0.35880  | 0.00000  | -0.01495 |
| 68 | C5 | PX  | 0.01184  | 0.00000  | -0.25360 | 0.00000  | 0.15239  |
| 69 | C5 | PY  | -0.00841 | 0.00000  | 0.11036  | 0.00000  | 0.37138  |
| 70 | C5 | PZ  | 0.00000  | 0.03607  | 0.00000  | -0.00937 | 0.00000  |
| 71 | C5 | S   | -1.04886 | 0.00000  | -2.48083 | 0.00000  | -1.97098 |
| 72 | C5 | PX  | -0.63280 | 0.00000  | -0.98136 | 0.00000  | 1.40965  |
| 73 | C5 | PY  | 0.28970  | 0.00000  | 0.67426  | 0.00000  | 1.27365  |
| 74 | C5 | PZ  | 0.00000  | 0.03277  | 0.00000  | -0.00767 | 0.00000  |
| 75 | C5 | DXX | 0.01411  | 0.00000  | -0.32674 | 0.00000  | 0.08944  |
| 76 | C5 | DYY | -0.15643 | 0.00000  | -0.05302 | 0.00000  | -0.50192 |
| 77 | C5 | DZZ | 0.14861  | 0.00000  | 0.50463  | 0.00000  | 0.44801  |
| 78 | C5 | DXY | -0.02581 | 0.00000  | 0.28957  | 0.00000  | -0.29711 |
| 79 | C5 | DXZ | 0.00000  | -0.21524 | 0.00000  | 0.15128  | 0.00000  |
| 80 | C5 | DYZ | 0.00000  | 0.15367  | 0.00000  | 0.30911  | 0.00000  |
| 81 | C6 | S   | -0.04122 | 0.00000  | 0.01665  | 0.00000  | -0.01424 |
| 82 | C6 | S   | -0.42051 | 0.00000  | 0.09400  | 0.00000  | 0.01889  |
| 83 | C6 | PX  | -0.01723 | 0.00000  | -0.08037 | 0.00000  | 0.04998  |
| 84 | C6 | PY  | 0.12241  | 0.00000  | -0.08050 | 0.00000  | -0.21090 |

|     |    |     |          |          |          |          |          |
|-----|----|-----|----------|----------|----------|----------|----------|
| 85  | C6 | PZ  | 0.00000  | 0.05786  | 0.00000  | -0.01567 | 0.00000  |
| 86  | C6 | S   | 0.30326  | 0.00000  | -1.34429 | 0.00000  | 1.83171  |
| 87  | C6 | PX  | -0.40726 | 0.00000  | -0.90460 | 0.00000  | -0.53427 |
| 88  | C6 | PY  | 1.28408  | 0.00000  | 1.12200  | 0.00000  | 0.56502  |
| 89  | C6 | PZ  | 0.00000  | -0.06221 | 0.00000  | -0.06710 | 0.00000  |
| 90  | C6 | DXX | -0.20477 | 0.00000  | -0.03445 | 0.00000  | 0.21249  |
| 91  | C6 | DYY | 0.31698  | 0.00000  | 0.01030  | 0.00000  | -0.00910 |
| 92  | C6 | DZZ | -0.20970 | 0.00000  | 0.06222  | 0.00000  | -0.11386 |
| 93  | C6 | DXY | 0.24800  | 0.00000  | -0.01061 | 0.00000  | -0.06752 |
| 94  | C6 | DXZ | 0.00000  | -0.26106 | 0.00000  | 0.11639  | 0.00000  |
| 95  | C6 | DYZ | 0.00000  | -0.05345 | 0.00000  | 0.33632  | 0.00000  |
| 96  | C7 | S   | 0.02128  | 0.00000  | 0.01142  | 0.00000  | -0.00207 |
| 97  | C7 | S   | 0.08842  | 0.00000  | 0.24917  | 0.00000  | 0.03229  |
| 98  | C7 | PX  | 0.00963  | 0.00000  | 0.01890  | 0.00000  | -0.00579 |
| 99  | C7 | PY  | -0.00921 | 0.00000  | 0.11859  | 0.00000  | -0.04803 |
| 100 | C7 | PZ  | 0.00000  | -0.00562 | 0.00000  | -0.03790 | 0.00000  |
| 101 | C7 | S   | -0.76733 | 0.00000  | -2.18589 | 0.00000  | -0.78496 |
| 102 | C7 | PX  | 0.11592  | 0.00000  | 1.39910  | 0.00000  | -0.02549 |
| 103 | C7 | PY  | -0.38857 | 0.00000  | 0.08232  | 0.00000  | -0.42775 |
| 104 | C7 | PZ  | 0.00000  | -0.03443 | 0.00000  | -0.08312 | 0.00000  |
| 105 | C7 | DXX | 0.03400  | 0.00000  | -0.14991 | 0.00000  | -0.03763 |
| 106 | C7 | DYY | -0.14668 | 0.00000  | 0.18501  | 0.00000  | 0.03251  |
| 107 | C7 | DZZ | 0.17218  | 0.00000  | 0.00652  | 0.00000  | -0.03458 |
| 108 | C7 | DXY | -0.01386 | 0.00000  | -0.00258 | 0.00000  | 0.00126  |
| 109 | C7 | DXZ | 0.00000  | 0.03838  | 0.00000  | -0.31451 | 0.00000  |
| 110 | C7 | DYZ | 0.00000  | 0.20142  | 0.00000  | 0.14139  | 0.00000  |
| 111 | H3 | S   | -0.14745 | 0.00000  | -0.19907 | 0.00000  | 0.12223  |
| 112 | H3 | S   | 0.31744  | 0.00000  | 0.38344  | 0.00000  | 0.03787  |
| 113 | H3 | PX  | -0.27722 | 0.00000  | 0.14050  | 0.00000  | -0.27173 |
| 114 | H3 | PY  | -0.05995 | 0.00000  | -0.33295 | 0.00000  | 0.05676  |
| 115 | H3 | PZ  | 0.00000  | 0.27787  | 0.00000  | -0.07095 | 0.00000  |
| 116 | H4 | S   | 0.04625  | 0.00000  | 0.19999  | 0.00000  | 0.13884  |
| 117 | H4 | S   | -0.21203 | 0.00000  | -0.40450 | 0.00000  | -0.12272 |
| 118 | H4 | PX  | 0.38887  | 0.00000  | -0.20385 | 0.00000  | -0.13430 |
| 119 | H4 | PY  | 0.27073  | 0.00000  | 0.20700  | 0.00000  | 0.03294  |
| 120 | H4 | PZ  | 0.00000  | -0.36407 | 0.00000  | -0.20669 | 0.00000  |
| 121 | N1 | S   | -0.02263 | 0.00000  | -0.00151 | 0.00000  | 0.00580  |
| 122 | N1 | S   | -0.69843 | 0.00000  | -0.07506 | 0.00000  | 0.11891  |
| 123 | N1 | PX  | -0.12177 | 0.00000  | -0.01195 | 0.00000  | 0.04825  |
| 124 | N1 | PY  | -0.21566 | 0.00000  | 0.05864  | 0.00000  | -0.01411 |
| 125 | N1 | PZ  | 0.00000  | -0.01279 | 0.00000  | 0.03025  | 0.00000  |
| 126 | N1 | S   | 1.88877  | 0.00000  | 0.70473  | 0.00000  | -0.56244 |
| 127 | N1 | PX  | 0.67318  | 0.00000  | 0.16033  | 0.00000  | -0.15790 |
| 128 | N1 | PY  | 0.58448  | 0.00000  | -0.12580 | 0.00000  | -0.38995 |
| 129 | N1 | PZ  | 0.00000  | 0.04591  | 0.00000  | 0.04067  | 0.00000  |
| 130 | N1 | DXX | 0.10140  | 0.00000  | -0.00863 | 0.00000  | 0.10584  |
| 131 | N1 | DYY | 0.11649  | 0.00000  | -0.03566 | 0.00000  | -0.15606 |
| 132 | N1 | DZZ | -0.32409 | 0.00000  | 0.06002  | 0.00000  | 0.05665  |
| 133 | N1 | DXY | 0.19719  | 0.00000  | -0.02942 | 0.00000  | -0.24838 |
| 134 | N1 | DXZ | 0.00000  | 0.17535  | 0.00000  | -0.02629 | 0.00000  |
| 135 | N1 | DYZ | 0.00000  | -0.31348 | 0.00000  | 0.35095  | 0.00000  |
| 136 | H6 | S   | 0.14026  | 0.00000  | -0.06776 | 0.00000  | -0.13289 |
| 137 | H6 | S   | -0.10674 | 0.00000  | 0.21389  | 0.00000  | 0.14746  |
| 138 | H6 | PX  | -0.11151 | 0.00000  | 0.21451  | 0.00000  | 0.15853  |

|     |     |     |          |          |          |          |          |
|-----|-----|-----|----------|----------|----------|----------|----------|
| 139 | H6  | PY  | -0.37149 | 0.00000  | 0.07541  | 0.00000  | -0.45151 |
| 140 | H6  | PZ  | 0.00000  | -0.48866 | 0.00000  | 0.01617  | 0.00000  |
| 141 | C8  | S   | -0.01268 | 0.00000  | -0.00858 | 0.00000  | 0.01215  |
| 142 | C8  | S   | -0.05399 | 0.00000  | -0.19782 | 0.00000  | -0.06554 |
| 143 | C8  | PX  | 0.04069  | 0.00000  | 0.04504  | 0.00000  | 0.09581  |
| 144 | C8  | PY  | -0.14114 | 0.00000  | 0.04351  | 0.00000  | 0.01744  |
| 145 | C8  | PZ  | 0.00000  | -0.04123 | 0.00000  | -0.09450 | 0.00000  |
| 146 | C8  | S   | 0.44980  | 0.00000  | 0.56885  | 0.00000  | -0.50594 |
| 147 | C8  | PX  | 0.15356  | 0.00000  | 0.96643  | 0.00000  | 0.04683  |
| 148 | C8  | PY  | -0.65859 | 0.00000  | 1.27436  | 0.00000  | 0.92799  |
| 149 | C8  | PZ  | 0.00000  | -0.01438 | 0.00000  | 0.06524  | 0.00000  |
| 150 | C8  | DXX | 0.04741  | 0.00000  | 0.06827  | 0.00000  | -0.04711 |
| 151 | C8  | DYY | 0.11554  | 0.00000  | -0.05051 | 0.00000  | -0.12566 |
| 152 | C8  | DZZ | -0.10744 | 0.00000  | -0.00394 | 0.00000  | 0.14054  |
| 153 | C8  | DXY | 0.00552  | 0.00000  | 0.00825  | 0.00000  | -0.02988 |
| 154 | C8  | DXZ | 0.00000  | 0.27627  | 0.00000  | -0.09923 | 0.00000  |
| 155 | C8  | DYZ | 0.00000  | -0.03819 | 0.00000  | 0.28066  | 0.00000  |
| 156 | H8  | S   | 0.00539  | 0.00000  | 0.01868  | 0.00000  | 0.03790  |
| 157 | H8  | S   | -0.02613 | 0.00000  | -0.37774 | 0.00000  | 0.01150  |
| 158 | H8  | PX  | 0.05960  | 0.00000  | 0.00481  | 0.00000  | 0.03214  |
| 159 | H8  | PY  | 0.08063  | 0.00000  | -0.17792 | 0.00000  | 0.08916  |
| 160 | H8  | PZ  | 0.00000  | 0.07380  | 0.00000  | 0.46125  | 0.00000  |
| 161 | C10 | S   | 0.01796  | 0.00000  | -0.01448 | 0.00000  | -0.01100 |
| 162 | C10 | S   | 0.04967  | 0.00000  | -0.03399 | 0.00000  | 0.02105  |
| 163 | C10 | PX  | -0.00148 | 0.00000  | -0.02269 | 0.00000  | -0.03337 |
| 164 | C10 | PY  | -0.13088 | 0.00000  | 0.07883  | 0.00000  | 0.15357  |
| 165 | C10 | PZ  | 0.00000  | -0.01671 | 0.00000  | -0.01882 | 0.00000  |
| 166 | C10 | S   | -0.86119 | 0.00000  | 0.98955  | 0.00000  | 0.91813  |
| 167 | C10 | PX  | -0.18228 | 0.00000  | -0.29683 | 0.00000  | -0.07597 |
| 168 | C10 | PY  | -0.39744 | 0.00000  | 0.51295  | 0.00000  | 0.37314  |
| 169 | C10 | PZ  | 0.00000  | -0.02534 | 0.00000  | -0.08583 | 0.00000  |
| 170 | C10 | DXX | 0.03922  | 0.00000  | -0.01108 | 0.00000  | -0.05152 |
| 171 | C10 | DYY | -0.17959 | 0.00000  | 0.11550  | 0.00000  | 0.12765  |
| 172 | C10 | DZZ | 0.18052  | 0.00000  | -0.12758 | 0.00000  | -0.09884 |
| 173 | C10 | DXY | 0.01050  | 0.00000  | -0.06741 | 0.00000  | -0.10720 |
| 174 | C10 | DXZ | 0.00000  | 0.18881  | 0.00000  | -0.17661 | 0.00000  |
| 175 | C10 | DYZ | 0.00000  | 0.06983  | 0.00000  | 0.49385  | 0.00000  |
| 176 | H16 | S   | 0.07833  | 0.00000  | -0.03637 | 0.00000  | -0.04618 |
| 177 | H16 | S   | 0.00689  | 0.00000  | 0.19381  | 0.00000  | 0.08794  |
| 178 | H16 | PX  | 0.03185  | 0.00000  | -0.03923 | 0.00000  | -0.02963 |
| 179 | H16 | PY  | -0.02550 | 0.00000  | 0.01748  | 0.00000  | 0.10737  |
| 180 | H16 | PZ  | 0.00000  | -0.09590 | 0.00000  | 0.54474  | 0.00000  |
| 181 | H18 | S   | -0.01562 | 0.00000  | -0.04678 | 0.00000  | 0.01610  |
| 182 | H18 | S   | -0.02876 | 0.00000  | -0.08595 | 0.00000  | -0.10962 |
| 183 | H18 | PX  | -0.06373 | 0.00000  | 0.01572  | 0.00000  | 0.03195  |
| 184 | H18 | PY  | 0.05579  | 0.00000  | -0.07388 | 0.00000  | -0.13180 |
| 185 | H18 | PZ  | 0.00000  | 0.28722  | 0.00000  | 0.15489  | 0.00000  |

|              |          |          |          |          |          |
|--------------|----------|----------|----------|----------|----------|
| MO:          | 146      | 147      | 148      | 149      | 150      |
| Eigenvalues: | 2.83549  | 2.86871  | 2.88238  | 2.92014  | 2.93390  |
| (ev):        | 77.15767 | 78.06173 | 78.43366 | 79.46111 | 79.83563 |

|      |   |          |         |         |         |         |
|------|---|----------|---------|---------|---------|---------|
|      | A | A        | A       | A       | A       |         |
| 1 H1 | S | -0.11053 | 0.00000 | 0.02070 | 0.02042 | 0.00000 |



|    |    |     |          |          |          |          |          |
|----|----|-----|----------|----------|----------|----------|----------|
| 2  | H1 | S   | -0.22806 | 0.00000  | -0.18686 | -0.10142 | 0.00000  |
| 3  | H1 | PX  | 0.02147  | 0.00000  | 0.03877  | 0.13183  | 0.00000  |
| 4  | H1 | PY  | -0.33753 | 0.00000  | 0.26944  | 0.12702  | 0.00000  |
| 5  | H1 | PZ  | 0.00000  | 0.07024  | 0.00000  | 0.00000  | 0.46301  |
| 6  | C1 | S   | -0.01175 | 0.00000  | 0.01300  | 0.03175  | 0.00000  |
| 7  | C1 | S   | 0.15017  | 0.00000  | -0.04484 | 0.05942  | 0.00000  |
| 8  | C1 | PX  | -0.12926 | 0.00000  | 0.14938  | 0.19820  | 0.00000  |
| 9  | C1 | PY  | 0.39424  | 0.00000  | 0.03088  | 0.07818  | 0.00000  |
| 10 | C1 | PZ  | 0.00000  | 0.02070  | 0.00000  | 0.00000  | 0.00216  |
| 11 | C1 | S   | 0.79627  | 0.00000  | -0.80424 | -1.09373 | 0.00000  |
| 12 | C1 | PX  | 0.36224  | 0.00000  | 0.57113  | 0.39278  | 0.00000  |
| 13 | C1 | PY  | 3.02780  | 0.00000  | -2.22389 | -0.12888 | 0.00000  |
| 14 | C1 | PZ  | 0.00000  | 0.05966  | 0.00000  | 0.00000  | -0.07591 |
| 15 | C1 | DXX | 0.04076  | 0.00000  | -0.13468 | -0.09068 | 0.00000  |
| 16 | C1 | DYY | 0.10053  | 0.00000  | -0.02451 | -0.13470 | 0.00000  |
| 17 | C1 | DZZ | -0.16760 | 0.00000  | 0.10571  | 0.23832  | 0.00000  |
| 18 | C1 | DXY | -0.55572 | 0.00000  | 0.04204  | -0.06454 | 0.00000  |
| 19 | C1 | DXZ | 0.00000  | -0.12268 | 0.00000  | 0.00000  | -0.45311 |
| 20 | C1 | DYZ | 0.00000  | 0.14675  | 0.00000  | 0.00000  | 0.00600  |
| 21 | C2 | S   | 0.03975  | 0.00000  | 0.02124  | 0.00849  | 0.00000  |
| 22 | C2 | S   | -0.01429 | 0.00000  | 0.06993  | 0.01764  | 0.00000  |
| 23 | C2 | PX  | -0.14907 | 0.00000  | -0.06280 | -0.09390 | 0.00000  |
| 24 | C2 | PY  | 0.02230  | 0.00000  | 0.18390  | -0.17506 | 0.00000  |
| 25 | C2 | PZ  | 0.00000  | -0.01910 | 0.00000  | 0.00000  | 0.01093  |
| 26 | C2 | S   | -1.30912 | 0.00000  | 0.23453  | -0.68295 | 0.00000  |
| 27 | C2 | PX  | 0.05757  | 0.00000  | -0.10038 | -0.30532 | 0.00000  |
| 28 | C2 | PY  | -0.41774 | 0.00000  | 3.41226  | -0.40653 | 0.00000  |
| 29 | C2 | PZ  | 0.00000  | -0.06268 | 0.00000  | 0.00000  | -0.04349 |
| 30 | C2 | DXX | -0.08004 | 0.00000  | -0.06033 | -0.03836 | 0.00000  |
| 31 | C2 | DYY | -0.16029 | 0.00000  | -0.01476 | -0.07945 | 0.00000  |
| 32 | C2 | DZZ | 0.30841  | 0.00000  | 0.15271  | 0.10547  | 0.00000  |
| 33 | C2 | DXY | -0.08100 | 0.00000  | 0.31022  | -0.16441 | 0.00000  |
| 34 | C2 | DXZ | 0.00000  | -0.02912 | 0.00000  | 0.00000  | 0.45540  |
| 35 | C2 | DYZ | 0.00000  | -0.18724 | 0.00000  | 0.00000  | 0.16740  |
| 36 | C3 | S   | -0.03809 | 0.00000  | -0.03552 | -0.06482 | 0.00000  |
| 37 | C3 | S   | -0.17460 | 0.00000  | -0.10277 | -0.26420 | 0.00000  |
| 38 | C3 | PX  | -0.04702 | 0.00000  | -0.05147 | -0.02265 | 0.00000  |
| 39 | C3 | PY  | 0.16156  | 0.00000  | 0.08096  | 0.18314  | 0.00000  |
| 40 | C3 | PZ  | 0.00000  | 0.04301  | 0.00000  | 0.00000  | -0.02375 |
| 41 | C3 | S   | 2.26004  | 0.00000  | 1.11753  | 2.22459  | 0.00000  |
| 42 | C3 | PX  | 0.41988  | 0.00000  | -2.52314 | 0.55554  | 0.00000  |
| 43 | C3 | PY  | 1.73242  | 0.00000  | -0.81150 | -0.81585 | 0.00000  |
| 44 | C3 | PZ  | 0.00000  | -0.02495 | 0.00000  | 0.00000  | 0.06028  |
| 45 | C3 | DXX | 0.13474  | 0.00000  | 0.11895  | -0.07838 | 0.00000  |
| 46 | C3 | DYY | 0.07947  | 0.00000  | 0.03404  | 0.38624  | 0.00000  |
| 47 | C3 | DZZ | -0.22205 | 0.00000  | -0.21965 | -0.43971 | 0.00000  |
| 48 | C3 | DXY | 0.29211  | 0.00000  | 0.19197  | -0.02802 | 0.00000  |
| 49 | C3 | DXZ | 0.00000  | 0.25789  | 0.00000  | 0.00000  | 0.02258  |
| 50 | C3 | DYZ | 0.00000  | -0.23038 | 0.00000  | 0.00000  | -0.14255 |
| 51 | C4 | S   | 0.01772  | 0.00000  | 0.01922  | -0.01063 | 0.00000  |
| 52 | C4 | S   | -0.12424 | 0.00000  | 0.04796  | -0.10927 | 0.00000  |
| 53 | C4 | PX  | -0.23712 | 0.00000  | 0.13826  | 0.10063  | 0.00000  |
| 54 | C4 | PY  | 0.29705  | 0.00000  | -0.10858 | -0.12421 | 0.00000  |
| 55 | C4 | PZ  | 0.00000  | -0.02071 | 0.00000  | 0.00000  | -0.01648 |

|     |    |     |          |          |          |          |          |
|-----|----|-----|----------|----------|----------|----------|----------|
| 56  | C4 | S   | -0.75845 | 0.00000  | -0.17209 | 0.66591  | 0.00000  |
| 57  | C4 | PX  | -2.94965 | 0.00000  | 2.39084  | 0.16565  | 0.00000  |
| 58  | C4 | PY  | 1.25371  | 0.00000  | -1.18627 | -0.41084 | 0.00000  |
| 59  | C4 | PZ  | 0.00000  | -0.08589 | 0.00000  | 0.00000  | 0.04178  |
| 60  | C4 | DXX | 0.04560  | 0.00000  | -0.41867 | -0.19576 | 0.00000  |
| 61  | C4 | DYY | -0.29477 | 0.00000  | 0.30920  | 0.22646  | 0.00000  |
| 62  | C4 | DZZ | 0.22479  | 0.00000  | 0.11471  | -0.07542 | 0.00000  |
| 63  | C4 | DXY | 0.26703  | 0.00000  | -0.17396 | -0.09937 | 0.00000  |
| 64  | C4 | DXZ | 0.00000  | -0.39796 | 0.00000  | 0.00000  | 0.10176  |
| 65  | C4 | DYZ | 0.00000  | -0.09778 | 0.00000  | 0.00000  | 0.30435  |
| 66  | C5 | S   | 0.02164  | 0.00000  | -0.01320 | -0.03081 | 0.00000  |
| 67  | C5 | S   | 0.20728  | 0.00000  | 0.01569  | 0.01334  | 0.00000  |
| 68  | C5 | PX  | -0.05495 | 0.00000  | 0.21065  | -0.02140 | 0.00000  |
| 69  | C5 | PY  | -0.17561 | 0.00000  | 0.07441  | -0.11709 | 0.00000  |
| 70  | C5 | PZ  | 0.00000  | 0.02285  | 0.00000  | 0.00000  | -0.02360 |
| 71  | C5 | S   | -1.47441 | 0.00000  | -0.65738 | 0.85016  | 0.00000  |
| 72  | C5 | PX  | -1.77527 | 0.00000  | 2.85683  | -0.08818 | 0.00000  |
| 73  | C5 | PY  | -0.89437 | 0.00000  | 1.49421  | -0.40465 | 0.00000  |
| 74  | C5 | PZ  | 0.00000  | 0.10040  | 0.00000  | 0.00000  | 0.01477  |
| 75  | C5 | DXX | -0.22763 | 0.00000  | 0.21183  | 0.10569  | 0.00000  |
| 76  | C5 | DYY | 0.15597  | 0.00000  | -0.18226 | 0.12168  | 0.00000  |
| 77  | C5 | DZZ | 0.08029  | 0.00000  | -0.08020 | -0.23909 | 0.00000  |
| 78  | C5 | DXY | 0.03135  | 0.00000  | -0.09978 | 0.14188  | 0.00000  |
| 79  | C5 | DXZ | 0.00000  | -0.42890 | 0.00000  | 0.00000  | 0.03720  |
| 80  | C5 | DYZ | 0.00000  | 0.10321  | 0.00000  | 0.00000  | 0.33771  |
| 81  | C6 | S   | -0.00675 | 0.00000  | -0.01934 | 0.00402  | 0.00000  |
| 82  | C6 | S   | 0.08790  | 0.00000  | 0.05945  | 0.02751  | 0.00000  |
| 83  | C6 | PX  | -0.07532 | 0.00000  | -0.08007 | -0.03542 | 0.00000  |
| 84  | C6 | PY  | 0.06368  | 0.00000  | 0.15713  | -0.09036 | 0.00000  |
| 85  | C6 | PZ  | 0.00000  | -0.08007 | 0.00000  | 0.00000  | -0.00529 |
| 86  | C6 | S   | 0.14539  | 0.00000  | 0.30014  | -0.35577 | 0.00000  |
| 87  | C6 | PX  | -0.45831 | 0.00000  | -2.98467 | -0.02692 | 0.00000  |
| 88  | C6 | PY  | -0.36683 | 0.00000  | 1.20472  | 0.25282  | 0.00000  |
| 89  | C6 | PZ  | 0.00000  | -0.02934 | 0.00000  | 0.00000  | 0.01397  |
| 90  | C6 | DXX | -0.20936 | 0.00000  | -0.27942 | -0.09990 | 0.00000  |
| 91  | C6 | DYY | 0.19861  | 0.00000  | 0.30605  | 0.12970  | 0.00000  |
| 92  | C6 | DZZ | -0.11158 | 0.00000  | -0.17132 | 0.02989  | 0.00000  |
| 93  | C6 | DXY | -0.22459 | 0.00000  | -0.19267 | 0.15269  | 0.00000  |
| 94  | C6 | DXZ | 0.00000  | 0.31365  | 0.00000  | 0.00000  | -0.07152 |
| 95  | C6 | DYZ | 0.00000  | 0.27658  | 0.00000  | 0.00000  | -0.09723 |
| 96  | C7 | S   | 0.01815  | 0.00000  | -0.02372 | -0.02231 | 0.00000  |
| 97  | C7 | S   | 0.16284  | 0.00000  | -0.09242 | -0.03607 | 0.00000  |
| 98  | C7 | PX  | 0.03417  | 0.00000  | 0.10048  | -0.05720 | 0.00000  |
| 99  | C7 | PY  | 0.09896  | 0.00000  | 0.00054  | -0.26904 | 0.00000  |
| 100 | C7 | PZ  | 0.00000  | -0.02316 | 0.00000  | 0.00000  | -0.01612 |
| 101 | C7 | S   | -0.78373 | 0.00000  | 0.54758  | -0.08009 | 0.00000  |
| 102 | C7 | PX  | 0.78379  | 0.00000  | 0.44401  | -0.68984 | 0.00000  |
| 103 | C7 | PY  | 0.67382  | 0.00000  | 0.02291  | -1.41074 | 0.00000  |
| 104 | C7 | PZ  | 0.00000  | 0.02843  | 0.00000  | 0.00000  | -0.02201 |
| 105 | C7 | DXX | -0.16415 | 0.00000  | -0.05682 | -0.10968 | 0.00000  |
| 106 | C7 | DYY | 0.07869  | 0.00000  | 0.20335  | 0.09539  | 0.00000  |
| 107 | C7 | DZZ | 0.10763  | 0.00000  | -0.14787 | -0.09940 | 0.00000  |
| 108 | C7 | DXY | -0.22588 | 0.00000  | 0.18032  | -0.02488 | 0.00000  |
| 109 | C7 | DXZ | 0.00000  | 0.12589  | 0.00000  | 0.00000  | -0.17231 |

|     |     |     |          |          |          |          |          |
|-----|-----|-----|----------|----------|----------|----------|----------|
| 110 | C7  | DYZ | 0.00000  | -0.29412 | 0.00000  | 0.00000  | -0.10595 |
| 111 | H3  | S   | 0.08370  | 0.00000  | 0.02559  | -0.03274 | 0.00000  |
| 112 | H3  | S   | 0.04401  | 0.00000  | 0.05662  | 0.13767  | 0.00000  |
| 113 | H3  | PX  | 0.50944  | 0.00000  | -0.08037 | 0.01544  | 0.00000  |
| 114 | H3  | PY  | -0.21713 | 0.00000  | -0.04681 | -0.12918 | 0.00000  |
| 115 | H3  | PZ  | 0.00000  | 0.31913  | 0.00000  | 0.00000  | -0.30932 |
| 116 | H4  | S   | 0.10025  | 0.00000  | 0.05204  | -0.02117 | 0.00000  |
| 117 | H4  | S   | 0.04565  | 0.00000  | 0.08183  | 0.07930  | 0.00000  |
| 118 | H4  | PX  | 0.25186  | 0.00000  | -0.35066 | 0.01850  | 0.00000  |
| 119 | H4  | PY  | 0.02179  | 0.00000  | -0.24867 | 0.01423  | 0.00000  |
| 120 | H4  | PZ  | 0.00000  | -0.37763 | 0.00000  | 0.00000  | -0.25126 |
| 121 | N1  | S   | 0.00587  | 0.00000  | 0.02123  | -0.01235 | 0.00000  |
| 122 | N1  | S   | 0.12488  | 0.00000  | 0.29863  | -0.17324 | 0.00000  |
| 123 | N1  | PX  | -0.06037 | 0.00000  | 0.01053  | -0.02260 | 0.00000  |
| 124 | N1  | PY  | 0.03294  | 0.00000  | -0.07011 | -0.11479 | 0.00000  |
| 125 | N1  | PZ  | 0.00000  | 0.03210  | 0.00000  | 0.00000  | -0.01366 |
| 126 | N1  | S   | -0.73325 | 0.00000  | -1.38895 | 0.69912  | 0.00000  |
| 127 | N1  | PX  | -0.22945 | 0.00000  | -0.28613 | 0.36940  | 0.00000  |
| 128 | N1  | PY  | -0.24013 | 0.00000  | 0.29609  | -0.05895 | 0.00000  |
| 129 | N1  | PZ  | 0.00000  | 0.13284  | 0.00000  | 0.00000  | 0.01844  |
| 130 | N1  | DXX | -0.19436 | 0.00000  | -0.17800 | 0.13175  | 0.00000  |
| 131 | N1  | DYY | 0.08017  | 0.00000  | -0.02444 | -0.08241 | 0.00000  |
| 132 | N1  | DZZ | 0.06770  | 0.00000  | 0.17996  | -0.11237 | 0.00000  |
| 133 | N1  | DXY | 0.05239  | 0.00000  | 0.35028  | -0.22132 | 0.00000  |
| 134 | N1  | DXZ | 0.00000  | 0.12263  | 0.00000  | 0.00000  | 0.08722  |
| 135 | N1  | DYZ | 0.00000  | 0.33324  | 0.00000  | 0.00000  | -0.09795 |
| 136 | H6  | S   | 0.15135  | 0.00000  | 0.03734  | -0.00060 | 0.00000  |
| 137 | H6  | S   | 0.00780  | 0.00000  | -0.06390 | -0.09426 | 0.00000  |
| 138 | H6  | PX  | -0.04478 | 0.00000  | -0.06916 | -0.07071 | 0.00000  |
| 139 | H6  | PY  | -0.11390 | 0.00000  | -0.39769 | 0.03534  | 0.00000  |
| 140 | H6  | PZ  | 0.00000  | 0.01303  | 0.00000  | 0.00000  | 0.45700  |
| 141 | C8  | S   | -0.01486 | 0.00000  | 0.00589  | 0.06831  | 0.00000  |
| 142 | C8  | S   | -0.03676 | 0.00000  | 0.14477  | 0.22126  | 0.00000  |
| 143 | C8  | PX  | 0.02245  | 0.00000  | -0.23703 | 0.21460  | 0.00000  |
| 144 | C8  | PY  | 0.27604  | 0.00000  | 0.28778  | 0.11960  | 0.00000  |
| 145 | C8  | PZ  | 0.00000  | 0.04041  | 0.00000  | 0.00000  | 0.03853  |
| 146 | C8  | S   | 0.23398  | 0.00000  | -0.16856 | -2.80607 | 0.00000  |
| 147 | C8  | PX  | 0.85264  | 0.00000  | -0.80599 | -0.78280 | 0.00000  |
| 148 | C8  | PY  | 1.60478  | 0.00000  | 0.97952  | -0.11731 | 0.00000  |
| 149 | C8  | PZ  | 0.00000  | -0.05577 | 0.00000  | 0.00000  | -0.02889 |
| 150 | C8  | DXX | 0.25282  | 0.00000  | 0.13283  | -0.17235 | 0.00000  |
| 151 | C8  | DYY | -0.20695 | 0.00000  | -0.19904 | -0.32876 | 0.00000  |
| 152 | C8  | DZZ | -0.02660 | 0.00000  | 0.08819  | 0.53304  | 0.00000  |
| 153 | C8  | DXY | 0.00123  | 0.00000  | 0.00886  | -0.21641 | 0.00000  |
| 154 | C8  | DXZ | 0.00000  | -0.01865 | 0.00000  | 0.00000  | -0.05179 |
| 155 | C8  | DYZ | 0.00000  | -0.12817 | 0.00000  | 0.00000  | -0.35551 |
| 156 | H8  | S   | -0.03706 | 0.00000  | -0.04622 | 0.05073  | 0.00000  |
| 157 | H8  | S   | -0.10747 | 0.00000  | -0.26485 | 0.03968  | 0.00000  |
| 158 | H8  | PX  | -0.02095 | 0.00000  | 0.07214  | 0.22539  | 0.00000  |
| 159 | H8  | PY  | -0.16453 | 0.00000  | -0.11975 | 0.59832  | 0.00000  |
| 160 | H8  | PZ  | 0.00000  | -0.22137 | 0.00000  | 0.00000  | 0.13582  |
| 161 | C10 | S   | -0.02259 | 0.00000  | -0.01991 | -0.01669 | 0.00000  |
| 162 | C10 | S   | -0.02366 | 0.00000  | -0.02737 | 0.07094  | 0.00000  |
| 163 | C10 | PX  | -0.02346 | 0.00000  | 0.15088  | -0.09240 | 0.00000  |

|     |     |     |          |          |          |          |          |
|-----|-----|-----|----------|----------|----------|----------|----------|
| 164 | C10 | PY  | 0.18777  | 0.00000  | 0.15387  | 0.35362  | 0.00000  |
| 165 | C10 | PZ  | 0.00000  | -0.00209 | 0.00000  | 0.00000  | -0.03061 |
| 166 | C10 | S   | 1.40234  | 0.00000  | 0.95979  | 0.82983  | 0.00000  |
| 167 | C10 | PX  | -0.21179 | 0.00000  | 0.57982  | 0.04295  | 0.00000  |
| 168 | C10 | PY  | 0.82486  | 0.00000  | 0.54967  | 0.37128  | 0.00000  |
| 169 | C10 | PZ  | 0.00000  | 0.03283  | 0.00000  | 0.00000  | 0.02418  |
| 170 | C10 | DXX | 0.01631  | 0.00000  | 0.03127  | -0.09997 | 0.00000  |
| 171 | C10 | DYY | 0.19631  | 0.00000  | 0.14698  | 0.21835  | 0.00000  |
| 172 | C10 | DZZ | -0.20595 | 0.00000  | -0.19667 | -0.14982 | 0.00000  |
| 173 | C10 | DXY | -0.04894 | 0.00000  | 0.24314  | -0.15876 | 0.00000  |
| 174 | C10 | DXZ | 0.00000  | -0.36593 | 0.00000  | 0.00000  | 0.07498  |
| 175 | C10 | DYZ | 0.00000  | -0.14830 | 0.00000  | 0.00000  | -0.36230 |
| 176 | H16 | S   | -0.06568 | 0.00000  | -0.05572 | -0.03034 | 0.00000  |
| 177 | H16 | S   | 0.23781  | 0.00000  | -0.20415 | 0.05861  | 0.00000  |
| 178 | H16 | PX  | -0.09401 | 0.00000  | -0.04464 | -0.13607 | 0.00000  |
| 179 | H16 | PY  | -0.05543 | 0.00000  | -0.26661 | 0.16838  | 0.00000  |
| 180 | H16 | PZ  | 0.00000  | 0.19413  | 0.00000  | 0.00000  | -0.24464 |
| 181 | H18 | S   | -0.07315 | 0.00000  | -0.05205 | 0.03652  | 0.00000  |
| 182 | H18 | S   | -0.00403 | 0.00000  | 0.39032  | -0.12180 | 0.00000  |
| 183 | H18 | PX  | 0.05352  | 0.00000  | 0.13395  | 0.07423  | 0.00000  |
| 184 | H18 | PY  | -0.14544 | 0.00000  | 0.13688  | -0.24902 | 0.00000  |
| 185 | H18 | PZ  | 0.00000  | -0.41611 | 0.00000  | 0.00000  | -0.09047 |

|              |          |          |          |          |          |
|--------------|----------|----------|----------|----------|----------|
| MO:          | 151      | 152      | 153      | 154      | 155      |
| Eigenvalues: | 2.96574  | 2.96810  | 2.99339  | 3.03725  | 3.06360  |
| (ev):        | 80.70196 | 80.76604 | 81.45435 | 82.64784 | 83.36496 |

|    |    |     |          |          |          |          |          |
|----|----|-----|----------|----------|----------|----------|----------|
|    |    |     | A        | A        | A        | A        | A        |
| 1  | H1 | S   | 0.00000  | -0.10144 | 0.00000  | 0.04284  | 0.00000  |
| 2  | H1 | S   | 0.00000  | -0.11324 | 0.00000  | 0.17261  | 0.00000  |
| 3  | H1 | PX  | 0.00000  | -0.09024 | 0.00000  | 0.11166  | 0.00000  |
| 4  | H1 | PY  | 0.00000  | 0.40790  | 0.00000  | 0.05196  | 0.00000  |
| 5  | H1 | PZ  | -0.15647 | 0.00000  | -0.11844 | 0.00000  | 0.03771  |
| 6  | C1 | S   | 0.00000  | -0.05191 | 0.00000  | -0.04369 | 0.00000  |
| 7  | C1 | S   | 0.00000  | -0.10363 | 0.00000  | -0.00939 | 0.00000  |
| 8  | C1 | PX  | 0.00000  | -0.10425 | 0.00000  | -0.02531 | 0.00000  |
| 9  | C1 | PY  | 0.00000  | 0.10925  | 0.00000  | 0.12020  | 0.00000  |
| 10 | C1 | PZ  | -0.02838 | 0.00000  | -0.02798 | 0.00000  | -0.00284 |
| 11 | C1 | S   | 0.00000  | 1.71595  | 0.00000  | 1.53881  | 0.00000  |
| 12 | C1 | PX  | 0.00000  | 0.16162  | 0.00000  | -0.92773 | 0.00000  |
| 13 | C1 | PY  | 0.00000  | -2.17107 | 0.00000  | 0.25103  | 0.00000  |
| 14 | C1 | PZ  | 0.02592  | 0.00000  | -0.03000 | 0.00000  | 0.02778  |
| 15 | C1 | DXX | 0.00000  | -0.02236 | 0.00000  | -0.06557 | 0.00000  |
| 16 | C1 | DYY | 0.00000  | 0.25909  | 0.00000  | 0.36377  | 0.00000  |
| 17 | C1 | DZZ | 0.00000  | -0.38132 | 0.00000  | -0.30895 | 0.00000  |
| 18 | C1 | DXY | 0.00000  | -0.27671 | 0.00000  | -0.15871 | 0.00000  |
| 19 | C1 | DXZ | 0.18877  | 0.00000  | 0.18216  | 0.00000  | -0.04412 |
| 20 | C1 | DYZ | -0.23595 | 0.00000  | -0.31624 | 0.00000  | -0.33397 |
| 21 | C2 | S   | 0.00000  | -0.01022 | 0.00000  | -0.05875 | 0.00000  |
| 22 | C2 | S   | 0.00000  | -0.05522 | 0.00000  | -0.18888 | 0.00000  |
| 23 | C2 | PX  | 0.00000  | 0.18988  | 0.00000  | 0.04327  | 0.00000  |
| 24 | C2 | PY  | 0.00000  | -0.11444 | 0.00000  | 0.07653  | 0.00000  |
| 25 | C2 | PZ  | 0.02393  | 0.00000  | 0.01196  | 0.00000  | 0.03006  |
| 26 | C2 | S   | 0.00000  | 0.52893  | 0.00000  | 2.70376  | 0.00000  |

|    |    |     |          |          |          |          |          |
|----|----|-----|----------|----------|----------|----------|----------|
| 27 | C2 | PX  | 0.00000  | 1.24496  | 0.00000  | 1.30402  | 0.00000  |
| 28 | C2 | PY  | 0.00000  | 1.86673  | 0.00000  | -0.13977 | 0.00000  |
| 29 | C2 | PZ  | -0.00583 | 0.00000  | 0.05621  | 0.00000  | -0.04853 |
| 30 | C2 | DXX | 0.00000  | 0.18905  | 0.00000  | -0.08356 | 0.00000  |
| 31 | C2 | DYY | 0.00000  | -0.01558 | 0.00000  | 0.46878  | 0.00000  |
| 32 | C2 | DZZ | 0.00000  | -0.08034 | 0.00000  | -0.36962 | 0.00000  |
| 33 | C2 | DXY | 0.00000  | -0.23079 | 0.00000  | 0.27140  | 0.00000  |
| 34 | C2 | DXZ | 0.01751  | 0.00000  | -0.15279 | 0.00000  | 0.27508  |
| 35 | C2 | DYZ | 0.21857  | 0.00000  | 0.40058  | 0.00000  | 0.21049  |
| 36 | C3 | S   | 0.00000  | -0.03275 | 0.00000  | -0.00457 | 0.00000  |
| 37 | C3 | S   | 0.00000  | -0.34128 | 0.00000  | -0.09168 | 0.00000  |
| 38 | C3 | PX  | 0.00000  | -0.11207 | 0.00000  | -0.04710 | 0.00000  |
| 39 | C3 | PY  | 0.00000  | 0.17962  | 0.00000  | 0.00541  | 0.00000  |
| 40 | C3 | PZ  | 0.02410  | 0.00000  | -0.01896 | 0.00000  | 0.06416  |
| 41 | C3 | S   | 0.00000  | 2.11260  | 0.00000  | 0.91562  | 0.00000  |
| 42 | C3 | PX  | 0.00000  | -4.82807 | 0.00000  | 0.74212  | 0.00000  |
| 43 | C3 | PY  | 0.00000  | -1.08913 | 0.00000  | -1.74685 | 0.00000  |
| 44 | C3 | PZ  | -0.00372 | 0.00000  | 0.05096  | 0.00000  | -0.03779 |
| 45 | C3 | DXX | 0.00000  | 0.44416  | 0.00000  | -0.13317 | 0.00000  |
| 46 | C3 | DYY | 0.00000  | -0.38000 | 0.00000  | 0.08884  | 0.00000  |
| 47 | C3 | DZZ | 0.00000  | -0.09534 | 0.00000  | -0.01270 | 0.00000  |
| 48 | C3 | DXY | 0.00000  | 0.06614  | 0.00000  | -0.19480 | 0.00000  |
| 49 | C3 | DXZ | 0.03137  | 0.00000  | -0.26892 | 0.00000  | -0.22822 |
| 50 | C3 | DYZ | -0.21544 | 0.00000  | -0.06126 | 0.00000  | -0.37732 |
| 51 | C4 | S   | 0.00000  | 0.02872  | 0.00000  | 0.01229  | 0.00000  |
| 52 | C4 | S   | 0.00000  | -0.13876 | 0.00000  | -0.14923 | 0.00000  |
| 53 | C4 | PX  | 0.00000  | 0.03195  | 0.00000  | -0.26108 | 0.00000  |
| 54 | C4 | PY  | 0.00000  | 0.22814  | 0.00000  | 0.14696  | 0.00000  |
| 55 | C4 | PZ  | 0.01822  | 0.00000  | 0.01947  | 0.00000  | 0.02708  |
| 56 | C4 | S   | 0.00000  | 0.19396  | 0.00000  | -0.75450 | 0.00000  |
| 57 | C4 | PX  | 0.00000  | 1.16070  | 0.00000  | -0.37138 | 0.00000  |
| 58 | C4 | PY  | 0.00000  | -0.12232 | 0.00000  | 0.13414  | 0.00000  |
| 59 | C4 | PZ  | -0.04182 | 0.00000  | 0.02323  | 0.00000  | -0.01835 |
| 60 | C4 | DXX | 0.00000  | -0.33762 | 0.00000  | -0.13492 | 0.00000  |
| 61 | C4 | DYY | 0.00000  | 0.03980  | 0.00000  | -0.05329 | 0.00000  |
| 62 | C4 | DZZ | 0.00000  | 0.24775  | 0.00000  | 0.14327  | 0.00000  |
| 63 | C4 | DXY | 0.00000  | -0.01116 | 0.00000  | 0.23034  | 0.00000  |
| 64 | C4 | DXZ | 0.08035  | 0.00000  | 0.29317  | 0.00000  | 0.17027  |
| 65 | C4 | DYZ | -0.37152 | 0.00000  | -0.25675 | 0.00000  | -0.16704 |
| 66 | C5 | S   | 0.00000  | -0.00863 | 0.00000  | 0.00862  | 0.00000  |
| 67 | C5 | S   | 0.00000  | 0.10571  | 0.00000  | -0.00114 | 0.00000  |
| 68 | C5 | PX  | 0.00000  | 0.14428  | 0.00000  | 0.23784  | 0.00000  |
| 69 | C5 | PY  | 0.00000  | 0.04240  | 0.00000  | 0.26828  | 0.00000  |
| 70 | C5 | PZ  | -0.01240 | 0.00000  | -0.02241 | 0.00000  | -0.02698 |
| 71 | C5 | S   | 0.00000  | -1.02078 | 0.00000  | -1.33898 | 0.00000  |
| 72 | C5 | PX  | 0.00000  | 1.06245  | 0.00000  | -0.07048 | 0.00000  |
| 73 | C5 | PY  | 0.00000  | 0.79549  | 0.00000  | 0.81322  | 0.00000  |
| 74 | C5 | PZ  | 0.03577  | 0.00000  | -0.03929 | 0.00000  | 0.03701  |
| 75 | C5 | DXX | 0.00000  | 0.44152  | 0.00000  | -0.15202 | 0.00000  |
| 76 | C5 | DYY | 0.00000  | -0.28717 | 0.00000  | -0.10911 | 0.00000  |
| 77 | C5 | DZZ | 0.00000  | -0.08350 | 0.00000  | 0.09974  | 0.00000  |
| 78 | C5 | DXY | 0.00000  | -0.12237 | 0.00000  | -0.10523 | 0.00000  |
| 79 | C5 | DXZ | 0.06405  | 0.00000  | 0.32563  | 0.00000  | 0.10034  |
| 80 | C5 | DYZ | 0.27076  | 0.00000  | 0.12999  | 0.00000  | 0.30742  |

|     |    |     |          |          |          |          |          |
|-----|----|-----|----------|----------|----------|----------|----------|
| 81  | C6 | S   | 0.00000  | 0.10305  | 0.00000  | -0.00559 | 0.00000  |
| 82  | C6 | S   | 0.00000  | 0.56397  | 0.00000  | 0.34486  | 0.00000  |
| 83  | C6 | PX  | 0.00000  | -0.05613 | 0.00000  | 0.01152  | 0.00000  |
| 84  | C6 | PY  | 0.00000  | -0.23620 | 0.00000  | -0.19959 | 0.00000  |
| 85  | C6 | PZ  | -0.06014 | 0.00000  | -0.02313 | 0.00000  | 0.01563  |
| 86  | C6 | S   | 0.00000  | -3.58581 | 0.00000  | -0.32536 | 0.00000  |
| 87  | C6 | PX  | 0.00000  | -4.50515 | 0.00000  | 0.75300  | 0.00000  |
| 88  | C6 | PY  | 0.00000  | -0.19446 | 0.00000  | -1.28102 | 0.00000  |
| 89  | C6 | PZ  | -0.03933 | 0.00000  | -0.11830 | 0.00000  | 0.08571  |
| 90  | C6 | DXX | 0.00000  | -0.27285 | 0.00000  | -0.03142 | 0.00000  |
| 91  | C6 | DYY | 0.00000  | -0.18120 | 0.00000  | 0.02864  | 0.00000  |
| 92  | C6 | DZZ | 0.00000  | 0.53563  | 0.00000  | -0.12846 | 0.00000  |
| 93  | C6 | DXY | 0.00000  | 0.13179  | 0.00000  | 0.36253  | 0.00000  |
| 94  | C6 | DXZ | 0.07812  | 0.00000  | -0.27489 | 0.00000  | -0.25148 |
| 95  | C6 | DYZ | 0.35065  | 0.00000  | 0.39160  | 0.00000  | -0.14895 |
| 96  | C7 | S   | 0.00000  | -0.03662 | 0.00000  | 0.02820  | 0.00000  |
| 97  | C7 | S   | 0.00000  | 0.04462  | 0.00000  | 0.11934  | 0.00000  |
| 98  | C7 | PX  | 0.00000  | -0.04877 | 0.00000  | 0.05715  | 0.00000  |
| 99  | C7 | PY  | 0.00000  | 0.13532  | 0.00000  | -0.02290 | 0.00000  |
| 100 | C7 | PZ  | 0.00247  | 0.00000  | -0.00689 | 0.00000  | -0.03787 |
| 101 | C7 | S   | 0.00000  | -0.22510 | 0.00000  | -2.09646 | 0.00000  |
| 102 | C7 | PX  | 0.00000  | 1.46601  | 0.00000  | 0.79725  | 0.00000  |
| 103 | C7 | PY  | 0.00000  | 1.06762  | 0.00000  | -1.31788 | 0.00000  |
| 104 | C7 | PZ  | 0.01222  | 0.00000  | 0.01396  | 0.00000  | 0.01458  |
| 105 | C7 | DXX | 0.00000  | -0.09703 | 0.00000  | -0.18103 | 0.00000  |
| 106 | C7 | DYY | 0.00000  | 0.33667  | 0.00000  | -0.04162 | 0.00000  |
| 107 | C7 | DZZ | 0.00000  | -0.29153 | 0.00000  | 0.14290  | 0.00000  |
| 108 | C7 | DXY | 0.00000  | -0.05327 | 0.00000  | -0.27058 | 0.00000  |
| 109 | C7 | DXZ | -0.06288 | 0.00000  | -0.05128 | 0.00000  | 0.57538  |
| 110 | C7 | DYZ | -0.26491 | 0.00000  | 0.09523  | 0.00000  | -0.18475 |
| 111 | H3 | S   | 0.00000  | -0.05944 | 0.00000  | 0.04009  | 0.00000  |
| 112 | H3 | S   | 0.00000  | -0.16897 | 0.00000  | 0.15083  | 0.00000  |
| 113 | H3 | PX  | 0.00000  | 0.12912  | 0.00000  | 0.06635  | 0.00000  |
| 114 | H3 | PY  | 0.00000  | -0.00557 | 0.00000  | -0.18536 | 0.00000  |
| 115 | H3 | PZ  | 0.28542  | 0.00000  | 0.07657  | 0.00000  | 0.05714  |
| 116 | H4 | S   | 0.00000  | 0.03677  | 0.00000  | -0.01463 | 0.00000  |
| 117 | H4 | S   | 0.00000  | -0.00869 | 0.00000  | -0.16682 | 0.00000  |
| 118 | H4 | PX  | 0.00000  | 0.11944  | 0.00000  | -0.20603 | 0.00000  |
| 119 | H4 | PY  | 0.00000  | 0.13334  | 0.00000  | -0.14506 | 0.00000  |
| 120 | H4 | PZ  | -0.19676 | 0.00000  | 0.07134  | 0.00000  | -0.18163 |
| 121 | N1 | S   | 0.00000  | 0.01693  | 0.00000  | 0.05541  | 0.00000  |
| 122 | N1 | S   | 0.00000  | 0.16854  | 0.00000  | 0.52274  | 0.00000  |
| 123 | N1 | PX  | 0.00000  | -0.02211 | 0.00000  | -0.12490 | 0.00000  |
| 124 | N1 | PY  | 0.00000  | 0.16218  | 0.00000  | -0.09806 | 0.00000  |
| 125 | N1 | PZ  | 0.01334  | 0.00000  | 0.02656  | 0.00000  | -0.02219 |
| 126 | N1 | S   | 0.00000  | -0.74065 | 0.00000  | -3.07246 | 0.00000  |
| 127 | N1 | PX  | 0.00000  | 0.51101  | 0.00000  | -1.30857 | 0.00000  |
| 128 | N1 | PY  | 0.00000  | -1.14779 | 0.00000  | 0.57033  | 0.00000  |
| 129 | N1 | PZ  | 0.05277  | 0.00000  | 0.22610  | 0.00000  | -0.09833 |
| 130 | N1 | DXX | 0.00000  | 0.15558  | 0.00000  | -0.20476 | 0.00000  |
| 131 | N1 | DYY | 0.00000  | -0.17958 | 0.00000  | -0.33474 | 0.00000  |
| 132 | N1 | DZZ | 0.00000  | 0.06813  | 0.00000  | 0.43451  | 0.00000  |
| 133 | N1 | DXY | 0.00000  | -0.04375 | 0.00000  | 0.35997  | 0.00000  |

|     |     |     |          |          |          |          |          |
|-----|-----|-----|----------|----------|----------|----------|----------|
| 134 | N1  | DXZ | -0.01015 | 0.00000  | 0.45485  | 0.00000  | -0.12157 |
| 135 | N1  | DYZ | 0.41492  | 0.00000  | 0.01900  | 0.00000  | -0.21226 |
| 136 | H6  | S   | 0.00000  | 0.10623  | 0.00000  | 0.05143  | 0.00000  |
| 137 | H6  | S   | 0.00000  | 0.51394  | 0.00000  | 0.21081  | 0.00000  |
| 138 | H6  | PX  | 0.00000  | 0.14074  | 0.00000  | -0.08697 | 0.00000  |
| 139 | H6  | PY  | 0.00000  | -0.30450 | 0.00000  | 0.27370  | 0.00000  |
| 140 | H6  | PZ  | 0.01403  | 0.00000  | -0.15292 | 0.00000  | 0.24045  |
| 141 | C8  | S   | 0.00000  | -0.02702 | 0.00000  | -0.07298 | 0.00000  |
| 142 | C8  | S   | 0.00000  | -0.23954 | 0.00000  | 0.34454  | 0.00000  |
| 143 | C8  | PX  | 0.00000  | 0.05140  | 0.00000  | -0.12440 | 0.00000  |
| 144 | C8  | PY  | 0.00000  | -0.15670 | 0.00000  | 0.18281  | 0.00000  |
| 145 | C8  | PZ  | 0.01989  | 0.00000  | 0.01777  | 0.00000  | -0.01743 |
| 146 | C8  | S   | 0.00000  | 1.21776  | 0.00000  | 2.60202  | 0.00000  |
| 147 | C8  | PX  | 0.00000  | 1.00556  | 0.00000  | -1.29474 | 0.00000  |
| 148 | C8  | PY  | 0.00000  | 0.43033  | 0.00000  | 0.41593  | 0.00000  |
| 149 | C8  | PZ  | 0.00224  | 0.00000  | -0.08052 | 0.00000  | -0.00761 |
| 150 | C8  | DXX | 0.00000  | -0.11052 | 0.00000  | 0.28949  | 0.00000  |
| 151 | C8  | DYY | 0.00000  | 0.23182  | 0.00000  | 0.12765  | 0.00000  |
| 152 | C8  | DZZ | 0.00000  | -0.14178 | 0.00000  | -0.56500 | 0.00000  |
| 153 | C8  | DXY | 0.00000  | -0.11705 | 0.00000  | -0.19037 | 0.00000  |
| 154 | C8  | DXZ | -0.37980 | 0.00000  | 0.27175  | 0.00000  | 0.17945  |
| 155 | C8  | DYZ | -0.03058 | 0.00000  | -0.43575 | 0.00000  | 0.43524  |
| 156 | H8  | S   | 0.00000  | -0.12214 | 0.00000  | -0.06083 | 0.00000  |
| 157 | H8  | S   | 0.00000  | -0.34744 | 0.00000  | -0.24039 | 0.00000  |
| 158 | H8  | PX  | 0.00000  | -0.02252 | 0.00000  | 0.07237  | 0.00000  |
| 159 | H8  | PY  | 0.00000  | -0.06383 | 0.00000  | 0.34047  | 0.00000  |
| 160 | H8  | PZ  | -0.04280 | 0.00000  | 0.06751  | 0.00000  | -0.48019 |
| 161 | C10 | S   | 0.00000  | 0.00382  | 0.00000  | 0.02250  | 0.00000  |
| 162 | C10 | S   | 0.00000  | -0.00751 | 0.00000  | 0.05040  | 0.00000  |
| 163 | C10 | PX  | 0.00000  | -0.12974 | 0.00000  | -0.00120 | 0.00000  |
| 164 | C10 | PY  | 0.00000  | -0.14261 | 0.00000  | -0.19090 | 0.00000  |
| 165 | C10 | PZ  | -0.00752 | 0.00000  | -0.03865 | 0.00000  | 0.05357  |
| 166 | C10 | S   | 0.00000  | -0.02518 | 0.00000  | -0.72831 | 0.00000  |
| 167 | C10 | PX  | 0.00000  | -0.17086 | 0.00000  | 0.25212  | 0.00000  |
| 168 | C10 | PY  | 0.00000  | -0.11269 | 0.00000  | -0.46899 | 0.00000  |
| 169 | C10 | PZ  | -0.00289 | 0.00000  | 0.02384  | 0.00000  | 0.00966  |
| 170 | C10 | DXX | 0.00000  | -0.05039 | 0.00000  | 0.06227  | 0.00000  |
| 171 | C10 | DYY | 0.00000  | -0.04216 | 0.00000  | -0.12340 | 0.00000  |
| 172 | C10 | DZZ | 0.00000  | 0.05897  | 0.00000  | 0.16063  | 0.00000  |
| 173 | C10 | DXY | 0.00000  | -0.13092 | 0.00000  | -0.04720 | 0.00000  |
| 174 | C10 | DXZ | 0.54568  | 0.00000  | -0.32601 | 0.00000  | -0.11700 |
| 175 | C10 | DYZ | -0.09663 | 0.00000  | -0.34041 | 0.00000  | 0.37589  |
| 176 | H16 | S   | 0.00000  | -0.02897 | 0.00000  | -0.01474 | 0.00000  |
| 177 | H16 | S   | 0.00000  | 0.09915  | 0.00000  | -0.12304 | 0.00000  |
| 178 | H16 | PX  | 0.00000  | 0.06655  | 0.00000  | 0.13063  | 0.00000  |
| 179 | H16 | PY  | 0.00000  | 0.18169  | 0.00000  | 0.05427  | 0.00000  |
| 180 | H16 | PZ  | -0.44118 | 0.00000  | 0.07480  | 0.00000  | 0.22197  |
| 181 | H18 | S   | 0.00000  | 0.03815  | 0.00000  | 0.04505  | 0.00000  |
| 182 | H18 | S   | 0.00000  | -0.15009 | 0.00000  | -0.00462 | 0.00000  |
| 183 | H18 | PX  | 0.00000  | -0.12762 | 0.00000  | -0.09543 | 0.00000  |
| 184 | H18 | PY  | 0.00000  | -0.01797 | 0.00000  | -0.05951 | 0.00000  |
| 185 | H18 | PZ  | 0.40063  | 0.00000  | -0.38140 | 0.00000  | 0.02721  |

MO:

156

157

158

159

160

|              |          |          |          |          |          |
|--------------|----------|----------|----------|----------|----------|
| Eigenvalues: | 3.10168  | 3.10809  | 3.11390  | 3.16425  | 3.24038  |
| (ev):        | 84.40116 | 84.57542 | 84.73346 | 86.10363 | 88.17531 |

|    |    | A   | A        | A        | A        | A        |          |
|----|----|-----|----------|----------|----------|----------|----------|
| 1  | H1 | S   | -0.00322 | 0.00000  | -0.04597 | -0.01196 | -0.09994 |
| 2  | H1 | S   | -0.15890 | 0.00000  | -0.16606 | -0.24728 | -0.30053 |
| 3  | H1 | PX  | 0.02673  | 0.00000  | 0.06031  | -0.08548 | 0.22357  |
| 4  | H1 | PY  | -0.30717 | 0.00000  | -0.21101 | -0.07393 | 0.17606  |
| 5  | H1 | PZ  | 0.00000  | 0.36050  | 0.00000  | 0.00000  | 0.00000  |
| 6  | C1 | S   | 0.04125  | 0.00000  | 0.01112  | 0.06330  | 0.02191  |
| 7  | C1 | S   | 0.07058  | 0.00000  | 0.15812  | 0.26671  | 0.26050  |
| 8  | C1 | PX  | 0.10409  | 0.00000  | -0.03724 | -0.01326 | 0.19840  |
| 9  | C1 | PY  | 0.13156  | 0.00000  | 0.24268  | -0.01008 | -0.20173 |
| 10 | C1 | PZ  | 0.00000  | 0.04923  | 0.00000  | 0.00000  | 0.00000  |
| 11 | C1 | S   | -1.28251 | 0.00000  | -0.02531 | -2.66589 | -1.04844 |
| 12 | C1 | PX  | 0.60734  | 0.00000  | 0.42022  | 1.41180  | 0.89961  |
| 13 | C1 | PY  | 0.97524  | 0.00000  | 0.19250  | -0.33898 | -0.46952 |
| 14 | C1 | PZ  | 0.00000  | -0.08933 | 0.00000  | 0.00000  | 0.00000  |
| 15 | C1 | DXX | -0.02826 | 0.00000  | 0.00391  | 0.06583  | 0.04286  |
| 16 | C1 | DYY | -0.19698 | 0.00000  | 0.05079  | -0.40344 | -0.17438 |
| 17 | C1 | DZZ | 0.23389  | 0.00000  | 0.00630  | 0.36397  | 0.12182  |
| 18 | C1 | DXY | 0.10764  | 0.00000  | -0.05254 | 0.09605  | -0.08715 |
| 19 | C1 | DXZ | 0.00000  | -0.43738 | 0.00000  | 0.00000  | 0.00000  |
| 20 | C1 | DYZ | 0.00000  | -0.09539 | 0.00000  | 0.00000  | 0.00000  |
| 21 | C2 | S   | 0.02293  | 0.00000  | -0.05404 | 0.06037  | -0.02617 |
| 22 | C2 | S   | 0.01676  | 0.00000  | -0.19790 | -0.02246 | -0.27082 |
| 23 | C2 | PX  | -0.08253 | 0.00000  | 0.13550  | 0.07686  | 0.11069  |
| 24 | C2 | PY  | -0.16510 | 0.00000  | -0.18715 | -0.06714 | 0.21419  |
| 25 | C2 | PZ  | 0.00000  | -0.03927 | 0.00000  | 0.00000  | 0.00000  |
| 26 | C2 | S   | -0.81393 | 0.00000  | 1.73662  | -1.67105 | 1.81534  |
| 27 | C2 | PX  | -0.38890 | 0.00000  | 1.18042  | 0.18006  | 1.44266  |
| 28 | C2 | PY  | -0.05239 | 0.00000  | -0.38072 | 1.39754  | 1.25117  |
| 29 | C2 | PZ  | 0.00000  | 0.09654  | 0.00000  | 0.00000  | 0.00000  |
| 30 | C2 | DXX | 0.00213  | 0.00000  | 0.00274  | 0.11343  | -0.03517 |
| 31 | C2 | DYY | -0.19009 | 0.00000  | 0.18787  | -0.42597 | 0.15909  |
| 32 | C2 | DZZ | 0.17262  | 0.00000  | -0.27975 | 0.39768  | -0.13436 |
| 33 | C2 | DXY | -0.09044 | 0.00000  | 0.13370  | 0.08322  | -0.01967 |
| 34 | C2 | DXZ | 0.00000  | -0.40548 | 0.00000  | 0.00000  | 0.00000  |
| 35 | C2 | DYZ | 0.00000  | 0.01191  | 0.00000  | 0.00000  | 0.00000  |
| 36 | C3 | S   | -0.04235 | 0.00000  | -0.07093 | -0.08090 | -0.09009 |
| 37 | C3 | S   | -0.17615 | 0.00000  | -0.33415 | -0.39548 | -0.33235 |
| 38 | C3 | PX  | -0.01254 | 0.00000  | -0.06052 | 0.11433  | 0.11798  |
| 39 | C3 | PY  | 0.02019  | 0.00000  | -0.09878 | -0.06949 | -0.11918 |
| 40 | C3 | PZ  | 0.00000  | 0.00768  | 0.00000  | 0.00000  | 0.00000  |
| 41 | C3 | S   | 2.09528  | 0.00000  | 4.08087  | 5.82234  | 6.45633  |
| 42 | C3 | PX  | 0.49522  | 0.00000  | -1.84799 | -1.66564 | -1.54905 |
| 43 | C3 | PY  | 0.61423  | 0.00000  | -0.50432 | -0.43890 | -2.74243 |
| 44 | C3 | PZ  | 0.00000  | 0.11095  | 0.00000  | 0.00000  | 0.00000  |
| 45 | C3 | DXX | -0.10352 | 0.00000  | 0.29947  | 0.35423  | 0.11113  |
| 46 | C3 | DYY | 0.24893  | 0.00000  | 0.07236  | 0.11462  | 0.40470  |
| 47 | C3 | DZZ | -0.22275 | 0.00000  | -0.37963 | -0.41860 | -0.46393 |
| 48 | C3 | DXY | 0.37350  | 0.00000  | 0.12303  | 0.02405  | -0.53749 |
| 49 | C3 | DXZ | 0.00000  | 0.05878  | 0.00000  | 0.00000  | 0.00000  |
| 50 | C3 | DYZ | 0.00000  | -0.44161 | 0.00000  | 0.00000  | 0.00000  |



|     |    |     |          |          |          |          |          |
|-----|----|-----|----------|----------|----------|----------|----------|
| 51  | C4 | S   | 0.01699  | 0.00000  | 0.04695  | -0.00668 | -0.05287 |
| 52  | C4 | S   | 0.01233  | 0.00000  | 0.01255  | -0.14008 | -0.11793 |
| 53  | C4 | PX  | 0.12411  | 0.00000  | -0.01567 | 0.27153  | -0.01992 |
| 54  | C4 | PY  | -0.17368 | 0.00000  | -0.03977 | -0.15174 | -0.00035 |
| 55  | C4 | PZ  | 0.00000  | -0.03188 | 0.00000  | 0.00000  | 0.00000  |
| 56  | C4 | S   | -0.33354 | 0.00000  | -0.57012 | 1.38104  | 2.18715  |
| 57  | C4 | PX  | -0.33354 | 0.00000  | 0.09424  | 0.49144  | -0.24912 |
| 58  | C4 | PY  | -0.11986 | 0.00000  | 0.07792  | -1.15662 | -1.31832 |
| 59  | C4 | PZ  | 0.00000  | 0.10216  | 0.00000  | 0.00000  | 0.00000  |
| 60  | C4 | DXX | -0.12745 | 0.00000  | -0.17278 | 0.13662  | 0.14923  |
| 61  | C4 | DYY | 0.13042  | 0.00000  | -0.07085 | 0.02638  | 0.03269  |
| 62  | C4 | DZZ | 0.08886  | 0.00000  | 0.32872  | -0.06268 | -0.27438 |
| 63  | C4 | DXY | -0.00190 | 0.00000  | 0.26265  | -0.04613 | -0.21354 |
| 64  | C4 | DXZ | 0.00000  | 0.17304  | 0.00000  | 0.00000  | 0.00000  |
| 65  | C4 | DYZ | 0.00000  | 0.35937  | 0.00000  | 0.00000  | 0.00000  |
| 66  | C5 | S   | -0.02902 | 0.00000  | -0.02830 | -0.03205 | 0.05079  |
| 67  | C5 | S   | 0.06425  | 0.00000  | -0.01662 | -0.04290 | 0.06270  |
| 68  | C5 | PX  | -0.06981 | 0.00000  | 0.11137  | -0.20752 | 0.02193  |
| 69  | C5 | PY  | -0.08972 | 0.00000  | 0.25504  | -0.05078 | 0.01596  |
| 70  | C5 | PZ  | 0.00000  | 0.03668  | 0.00000  | 0.00000  | 0.00000  |
| 71  | C5 | S   | 0.57436  | 0.00000  | -0.07607 | 0.04880  | -3.04164 |
| 72  | C5 | PX  | 0.00183  | 0.00000  | 0.01575  | 0.49385  | 0.01201  |
| 73  | C5 | PY  | -0.39285 | 0.00000  | 0.46330  | 0.14777  | 1.39279  |
| 74  | C5 | PZ  | 0.00000  | -0.09728 | 0.00000  | 0.00000  | 0.00000  |
| 75  | C5 | DXX | 0.07121  | 0.00000  | 0.18386  | 0.25499  | -0.14874 |
| 76  | C5 | DYY | 0.12105  | 0.00000  | -0.11081 | -0.04797 | -0.07546 |
| 77  | C5 | DZZ | -0.21268 | 0.00000  | -0.18496 | -0.25533 | 0.26723  |
| 78  | C5 | DXY | 0.21764  | 0.00000  | 0.11072  | 0.16587  | -0.22383 |
| 79  | C5 | DXZ | 0.00000  | 0.18686  | 0.00000  | 0.00000  | 0.00000  |
| 80  | C5 | DYZ | 0.00000  | -0.34047 | 0.00000  | 0.00000  | 0.00000  |
| 81  | C6 | S   | -0.00908 | 0.00000  | 0.10178  | 0.00925  | 0.04947  |
| 82  | C6 | S   | 0.07951  | 0.00000  | -0.04393 | 0.62688  | 0.12751  |
| 83  | C6 | PX  | 0.00846  | 0.00000  | 0.06759  | -0.28121 | 0.11157  |
| 84  | C6 | PY  | -0.01090 | 0.00000  | 0.50266  | -0.20110 | 0.13432  |
| 85  | C6 | PZ  | 0.00000  | -0.01967 | 0.00000  | 0.00000  | 0.00000  |
| 86  | C6 | S   | 0.58673  | 0.00000  | -5.76230 | -0.00973 | -3.24897 |
| 87  | C6 | PX  | -0.11432 | 0.00000  | -1.09587 | -3.37468 | -2.05486 |
| 88  | C6 | PY  | -0.11872 | 0.00000  | 0.14105  | -0.09466 | 0.55783  |
| 89  | C6 | PZ  | 0.00000  | -0.13925 | 0.00000  | 0.00000  | 0.00000  |
| 90  | C6 | DXX | -0.05376 | 0.00000  | -0.21346 | -0.17079 | -0.15397 |
| 91  | C6 | DYY | 0.05404  | 0.00000  | -0.44723 | 0.14276  | -0.20357 |
| 92  | C6 | DZZ | -0.04648 | 0.00000  | 0.73808  | -0.13097 | 0.29166  |
| 93  | C6 | DXY | -0.00577 | 0.00000  | 0.05389  | -0.04725 | -0.49792 |
| 94  | C6 | DXZ | 0.00000  | 0.08339  | 0.00000  | 0.00000  | 0.00000  |
| 95  | C6 | DYZ | 0.00000  | 0.38642  | 0.00000  | 0.00000  | 0.00000  |
| 96  | C7 | S   | 0.01605  | 0.00000  | 0.03402  | 0.04915  | 0.09019  |
| 97  | C7 | S   | 0.23941  | 0.00000  | 0.23356  | 0.32288  | 0.36790  |
| 98  | C7 | PX  | 0.26477  | 0.00000  | 0.10023  | 0.00719  | 0.11069  |
| 99  | C7 | PY  | -0.08866 | 0.00000  | -0.10118 | -0.01316 | -0.27843 |
| 100 | C7 | PZ  | 0.00000  | -0.04943 | 0.00000  | 0.00000  | 0.00000  |
| 101 | C7 | S   | -0.83841 | 0.00000  | -2.37353 | -3.46258 | -6.25763 |
| 102 | C7 | PX  | 0.36948  | 0.00000  | 1.72114  | 2.01881  | 2.97569  |
| 103 | C7 | PY  | -0.20222 | 0.00000  | 0.00340  | -0.76300 | -1.31094 |
| 104 | C7 | PZ  | 0.00000  | -0.03343 | 0.00000  | 0.00000  | 0.00000  |

|     |    |     |          |          |          |          |          |
|-----|----|-----|----------|----------|----------|----------|----------|
| 105 | C7 | DXX | -0.05764 | 0.00000  | -0.01128 | 0.00828  | -0.09776 |
| 106 | C7 | DYY | 0.15337  | 0.00000  | -0.12721 | -0.35403 | -0.55861 |
| 107 | C7 | DZZ | 0.05526  | 0.00000  | 0.17619  | 0.27660  | 0.49323  |
| 108 | C7 | DXY | 0.06834  | 0.00000  | 0.00441  | -0.10255 | -0.17683 |
| 109 | C7 | DXZ | 0.00000  | 0.22047  | 0.00000  | 0.00000  | 0.00000  |
| 110 | C7 | DYZ | 0.00000  | -0.33537 | 0.00000  | 0.00000  | 0.00000  |
| 111 | H3 | S   | 0.05756  | 0.00000  | 0.03369  | 0.03430  | 0.05916  |
| 112 | H3 | S   | 0.16952  | 0.00000  | 0.04692  | 0.20507  | 0.24678  |
| 113 | H3 | PX  | -0.04403 | 0.00000  | -0.15997 | -0.28442 | 0.07163  |
| 114 | H3 | PY  | -0.09571 | 0.00000  | -0.05899 | 0.12869  | 0.02929  |
| 115 | H3 | PZ  | 0.00000  | -0.34578 | 0.00000  | 0.00000  | 0.00000  |
| 116 | H4 | S   | 0.01783  | 0.00000  | -0.05998 | 0.00408  | 0.02810  |
| 117 | H4 | S   | 0.03928  | 0.00000  | -0.22584 | -0.02261 | -0.11353 |
| 118 | H4 | PX  | -0.06636 | 0.00000  | -0.18104 | 0.08906  | 0.06196  |
| 119 | H4 | PY  | 0.03660  | 0.00000  | 0.09539  | 0.15599  | -0.12937 |
| 120 | H4 | PZ  | 0.00000  | 0.32986  | 0.00000  | 0.00000  | 0.00000  |
| 121 | N1 | S   | 0.00454  | 0.00000  | -0.05960 | 0.05590  | -0.01917 |
| 122 | N1 | S   | 0.18266  | 0.00000  | -0.56776 | 0.66226  | 0.00088  |
| 123 | N1 | PX  | 0.00373  | 0.00000  | 0.08124  | -0.15597 | 0.08372  |
| 124 | N1 | PY  | -0.00546 | 0.00000  | 0.24194  | 0.10313  | 0.27558  |
| 125 | N1 | PZ  | 0.00000  | 0.02770  | 0.00000  | 0.00000  | 0.00000  |
| 126 | N1 | S   | -0.72344 | 0.00000  | 3.10952  | -3.41948 | 0.74553  |
| 127 | N1 | PX  | -0.28230 | 0.00000  | 1.01652  | -0.59193 | 0.17181  |
| 128 | N1 | PY  | -0.09522 | 0.00000  | 0.64783  | -0.97566 | -0.02562 |
| 129 | N1 | PZ  | 0.00000  | 0.11492  | 0.00000  | 0.00000  | 0.00000  |
| 130 | N1 | DXX | -0.24318 | 0.00000  | 0.04700  | -0.02675 | -0.18554 |
| 131 | N1 | DYY | 0.10829  | 0.00000  | 0.54385  | -0.51917 | 0.42993  |
| 132 | N1 | DZZ | 0.06965  | 0.00000  | -0.51752 | 0.42630  | -0.15170 |
| 133 | N1 | DXY | -0.04444 | 0.00000  | 0.37258  | 0.23637  | -0.03138 |
| 134 | N1 | DXZ | 0.00000  | 0.07056  | 0.00000  | 0.00000  | 0.00000  |
| 135 | N1 | DYZ | 0.00000  | 0.30658  | 0.00000  | 0.00000  | 0.00000  |
| 136 | H6 | S   | 0.00298  | 0.00000  | 0.04950  | 0.17861  | 0.15467  |
| 137 | H6 | S   | -0.10159 | 0.00000  | 0.35087  | 0.28963  | 0.43785  |
| 138 | H6 | PX  | -0.01064 | 0.00000  | 0.09662  | 0.23647  | 0.18111  |
| 139 | H6 | PY  | -0.00188 | 0.00000  | 0.33856  | 0.01263  | -0.22004 |
| 140 | H6 | PZ  | 0.00000  | -0.34321 | 0.00000  | 0.00000  | 0.00000  |
| 141 | C8 | S   | -0.05967 | 0.00000  | 0.01364  | -0.06436 | -0.03949 |
| 142 | C8 | S   | -0.09970 | 0.00000  | -0.24738 | 0.04290  | -0.32184 |
| 143 | C8 | PX  | -0.03978 | 0.00000  | 0.08714  | -0.11029 | 0.16807  |
| 144 | C8 | PY  | 0.07901  | 0.00000  | -0.10270 | -0.00720 | 0.08995  |
| 145 | C8 | PZ  | 0.00000  | 0.00448  | 0.00000  | 0.00000  | 0.00000  |
| 146 | C8 | S   | 2.42604  | 0.00000  | -0.13320 | 2.39262  | 2.56910  |
| 147 | C8 | PX  | 0.06228  | 0.00000  | 1.50871  | 0.39479  | 1.75605  |
| 148 | C8 | PY  | -0.60326 | 0.00000  | 1.04923  | 2.31403  | 1.67437  |
| 149 | C8 | PZ  | 0.00000  | -0.01927 | 0.00000  | 0.00000  | 0.00000  |
| 150 | C8 | DXX | -0.35880 | 0.00000  | 0.12320  | 0.35817  | 0.15328  |
| 151 | C8 | DYY | 0.46327  | 0.00000  | -0.05137 | 0.03302  | 0.01193  |
| 152 | C8 | DZZ | -0.31850 | 0.00000  | 0.14309  | -0.40734 | -0.13484 |
| 153 | C8 | DXY | -0.00848 | 0.00000  | 0.13459  | -0.22565 | 0.28424  |
| 154 | C8 | DXZ | 0.00000  | -0.07840 | 0.00000  | 0.00000  | 0.00000  |
| 155 | C8 | DYZ | 0.00000  | 0.08896  | 0.00000  | 0.00000  | 0.00000  |
| 156 | H8 | S   | -0.05925 | 0.00000  | -0.09298 | -0.07079 | -0.04414 |
| 157 | H8 | S   | -0.24367 | 0.00000  | -0.47330 | -0.45966 | -0.66728 |
| 158 | H8 | PX  | 0.41702  | 0.00000  | 0.09157  | -0.08755 | -0.04037 |

|     |     |     |          |          |          |          |          |
|-----|-----|-----|----------|----------|----------|----------|----------|
| 159 | H8  | PY  | -0.12922 | 0.00000  | -0.14110 | 0.02542  | 0.15366  |
| 160 | H8  | PZ  | 0.00000  | -0.21987 | 0.00000  | 0.00000  | 0.00000  |
| 161 | C10 | S   | -0.00099 | 0.00000  | -0.01047 | 0.02393  | -0.01117 |
| 162 | C10 | S   | 0.17826  | 0.00000  | -0.07830 | -0.00965 | 0.21426  |
| 163 | C10 | PX  | -0.05225 | 0.00000  | 0.02077  | -0.07469 | 0.07284  |
| 164 | C10 | PY  | -0.34341 | 0.00000  | 0.08186  | -0.03435 | -0.04373 |
| 165 | C10 | PZ  | 0.00000  | 0.01073  | 0.00000  | 0.00000  | 0.00000  |
| 166 | C10 | S   | -1.20736 | 0.00000  | 0.98471  | 0.74886  | 0.61043  |
| 167 | C10 | PX  | -0.13353 | 0.00000  | -0.56742 | -0.13367 | -0.77235 |
| 168 | C10 | PY  | -0.99874 | 0.00000  | 0.67954  | 0.31012  | 0.00806  |
| 169 | C10 | PZ  | 0.00000  | 0.00647  | 0.00000  | 0.00000  | 0.00000  |
| 170 | C10 | DXX | -0.28977 | 0.00000  | 0.10996  | 0.21716  | -0.09622 |
| 171 | C10 | DYY | 0.10114  | 0.00000  | -0.05400 | -0.22159 | 0.12323  |
| 172 | C10 | DZZ | 0.02573  | 0.00000  | -0.06537 | 0.15508  | -0.07270 |
| 173 | C10 | DXY | -0.00460 | 0.00000  | 0.02189  | -0.09338 | 0.06203  |
| 174 | C10 | DXZ | 0.00000  | 0.06394  | 0.00000  | 0.00000  | 0.00000  |
| 175 | C10 | DYZ | 0.00000  | 0.06004  | 0.00000  | 0.00000  | 0.00000  |
| 176 | H16 | S   | 0.04791  | 0.00000  | 0.04060  | -0.01524 | 0.07862  |
| 177 | H16 | S   | -0.17566 | 0.00000  | 0.30116  | 0.13444  | 0.07815  |
| 178 | H16 | PX  | 0.37724  | 0.00000  | -0.15243 | -0.08655 | 0.21017  |
| 179 | H16 | PY  | 0.32928  | 0.00000  | -0.14818 | -0.06172 | -0.00707 |
| 180 | H16 | PZ  | 0.00000  | -0.01993 | 0.00000  | 0.00000  | 0.00000  |
| 181 | H18 | S   | 0.05697  | 0.00000  | -0.14609 | -0.04314 | -0.13272 |
| 182 | H18 | S   | -0.28223 | 0.00000  | -0.01586 | -0.06191 | -0.32399 |
| 183 | H18 | PX  | -0.35839 | 0.00000  | 0.08820  | 0.00657  | -0.20229 |
| 184 | H18 | PY  | 0.31383  | 0.00000  | -0.05096 | -0.23020 | 0.17741  |
| 185 | H18 | PZ  | 0.00000  | 0.05755  | 0.00000  | 0.00000  | 0.00000  |

|              |          |          |          |          |          |
|--------------|----------|----------|----------|----------|----------|
| MO:          | 161      | 162      | 163      | 164      | 165      |
| Eigenvalues: | 3.29653  | 3.32987  | 3.34927  | 3.43269  | 3.46974  |
| (ev):        | 89.70315 | 90.61046 | 91.13834 | 93.40837 | 94.41652 |

|    |    | A   | A        | A        | A        | A        |          |
|----|----|-----|----------|----------|----------|----------|----------|
| 1  | H1 | S   | -0.15350 | 0.01250  | 0.08817  | 0.00796  | 0.06530  |
| 2  | H1 | S   | -0.36332 | -0.02323 | 0.24145  | -0.01352 | 0.06404  |
| 3  | H1 | PX  | 0.31966  | 0.02270  | -0.29923 | -0.07341 | -0.11664 |
| 4  | H1 | PY  | -0.23776 | 0.03528  | 0.02582  | 0.14223  | -0.38469 |
| 5  | H1 | PZ  | 0.00000  | 0.00000  | 0.00000  | 0.00000  | 0.00000  |
| 6  | C1 | S   | -0.02741 | 0.01585  | 0.04578  | 0.01242  | 0.01975  |
| 7  | C1 | S   | 0.08992  | -0.02318 | -0.23086 | -0.15274 | -0.24367 |
| 8  | C1 | PX  | 0.23780  | 0.13337  | -0.06956 | 0.08287  | 0.10408  |
| 9  | C1 | PY  | -0.11591 | 0.00457  | -0.15211 | 0.07035  | -0.25322 |
| 10 | C1 | PZ  | 0.00000  | 0.00000  | 0.00000  | 0.00000  | 0.00000  |
| 11 | C1 | S   | 0.59282  | -0.59426 | -0.58915 | 0.20250  | -0.20480 |
| 12 | C1 | PX  | 0.45979  | 0.11605  | 0.02477  | 0.11023  | -0.01204 |
| 13 | C1 | PY  | -0.20390 | 0.88140  | -0.51450 | -0.02954 | 0.86265  |
| 14 | C1 | PZ  | 0.00000  | 0.00000  | 0.00000  | 0.00000  | 0.00000  |
| 15 | C1 | DXX | -0.09553 | -0.01958 | 0.06797  | -0.01004 | -0.11315 |
| 16 | C1 | DYY | 0.17327  | -0.13241 | -0.30492 | -0.14543 | -0.06803 |
| 17 | C1 | DZZ | -0.16876 | 0.08830  | 0.31523  | 0.09489  | 0.15036  |
| 18 | C1 | DXY | 0.35859  | -0.15126 | 0.09781  | -0.29773 | 0.58569  |
| 19 | C1 | DXZ | 0.00000  | 0.00000  | 0.00000  | 0.00000  | 0.00000  |
| 20 | C1 | DYZ | 0.00000  | 0.00000  | 0.00000  | 0.00000  | 0.00000  |
| 21 | C2 | S   | -0.02052 | 0.00496  | -0.04218 | -0.03023 | -0.01386 |

|    |    |     |          |          |          |          |          |
|----|----|-----|----------|----------|----------|----------|----------|
| 22 | C2 | S   | -0.13333 | 0.09227  | 0.20781  | 0.27321  | 0.08513  |
| 23 | C2 | PX  | -0.15250 | 0.14006  | -0.06023 | 0.06655  | 0.02196  |
| 24 | C2 | PY  | -0.16866 | 0.03928  | 0.15293  | 0.11701  | -0.16386 |
| 25 | C2 | PZ  | 0.00000  | 0.00000  | 0.00000  | 0.00000  | 0.00000  |
| 26 | C2 | S   | 0.96541  | -0.31572 | 0.79520  | 0.26396  | 0.19828  |
| 27 | C2 | PX  | 0.85092  | -0.06667 | 0.06330  | 0.49551  | 0.15963  |
| 28 | C2 | PY  | 1.06183  | -0.48785 | 0.69813  | -0.40607 | -0.12562 |
| 29 | C2 | PZ  | 0.00000  | 0.00000  | 0.00000  | 0.00000  | 0.00000  |
| 30 | C2 | DXX | -0.01956 | 0.05765  | -0.09232 | 0.05267  | 0.11838  |
| 31 | C2 | DYY | 0.06808  | 0.00128  | 0.32372  | 0.16484  | 0.06268  |
| 32 | C2 | DZZ | -0.09290 | 0.01310  | -0.29108 | -0.20682 | -0.08278 |
| 33 | C2 | DXY | -0.33154 | -0.09737 | 0.08121  | 0.32252  | -0.49657 |
| 34 | C2 | DXZ | 0.00000  | 0.00000  | 0.00000  | 0.00000  | 0.00000  |
| 35 | C2 | DYZ | 0.00000  | 0.00000  | 0.00000  | 0.00000  | 0.00000  |
| 36 | C3 | S   | -0.03576 | -0.00679 | -0.02900 | -0.06186 | 0.00114  |
| 37 | C3 | S   | -0.11275 | 0.00455  | 0.00138  | 0.17992  | -0.34157 |
| 38 | C3 | PX  | -0.00864 | 0.10885  | -0.02706 | 0.16854  | -0.00132 |
| 39 | C3 | PY  | -0.44068 | 0.07839  | 0.09708  | -0.15075 | -0.03355 |
| 40 | C3 | PZ  | 0.00000  | 0.00000  | 0.00000  | 0.00000  | 0.00000  |
| 41 | C3 | S   | 3.04173  | 0.78799  | 1.57568  | 2.11372  | 1.48077  |
| 42 | C3 | PX  | -2.06096 | 1.35193  | -0.33333 | -0.97750 | 0.80941  |
| 43 | C3 | PY  | -0.57655 | 0.00349  | -1.38563 | -0.72389 | -0.28917 |
| 44 | C3 | PZ  | 0.00000  | 0.00000  | 0.00000  | 0.00000  | 0.00000  |
| 45 | C3 | DXX | 0.10243  | -0.44341 | 0.19850  | -0.29826 | 0.06811  |
| 46 | C3 | DYY | 0.17968  | 0.36485  | -0.09008 | 0.52613  | -0.09516 |
| 47 | C3 | DZZ | -0.17930 | -0.02351 | -0.13518 | -0.33720 | 0.00559  |
| 48 | C3 | DXY | -0.31032 | 0.11829  | 0.25848  | 0.15830  | 0.13516  |
| 49 | C3 | DXZ | 0.00000  | 0.00000  | 0.00000  | 0.00000  | 0.00000  |
| 50 | C3 | DYZ | 0.00000  | 0.00000  | 0.00000  | 0.00000  | 0.00000  |
| 51 | C4 | S   | 0.01590  | -0.01945 | -0.06707 | -0.03076 | -0.01707 |
| 52 | C4 | S   | 0.09558  | -0.11077 | 0.21917  | -0.08680 | 0.18219  |
| 53 | C4 | PX  | -0.03399 | 0.06377  | 0.06119  | 0.05502  | 0.17493  |
| 54 | C4 | PY  | -0.19231 | 0.00928  | 0.01629  | 0.04645  | -0.22744 |
| 55 | C4 | PZ  | 0.00000  | 0.00000  | 0.00000  | 0.00000  | 0.00000  |
| 56 | C4 | S   | -0.35903 | 0.53529  | 1.37813  | 0.84599  | 0.14093  |
| 57 | C4 | PX  | -0.00243 | -0.81142 | 0.10658  | -0.40801 | -0.83880 |
| 58 | C4 | PY  | -0.27256 | -0.04688 | -0.44526 | 0.01549  | 0.01393  |
| 59 | C4 | PZ  | 0.00000  | 0.00000  | 0.00000  | 0.00000  | 0.00000  |
| 60 | C4 | DXX | -0.27100 | -0.06282 | 0.24549  | -0.04807 | -0.23275 |
| 61 | C4 | DYY | 0.25093  | 0.09354  | -0.00129 | -0.01550 | 0.42150  |
| 62 | C4 | DZZ | 0.10443  | -0.10416 | -0.42202 | -0.15999 | -0.13939 |
| 63 | C4 | DXY | -0.10333 | -0.19037 | -0.23745 | -0.18198 | -0.38278 |
| 64 | C4 | DXZ | 0.00000  | 0.00000  | 0.00000  | 0.00000  | 0.00000  |
| 65 | C4 | DYZ | 0.00000  | 0.00000  | 0.00000  | 0.00000  | 0.00000  |
| 66 | C5 | S   | -0.00927 | 0.01668  | 0.07296  | 0.01787  | 0.02310  |
| 67 | C5 | S   | 0.13383  | 0.06177  | -0.17640 | -0.23567 | 0.21174  |
| 68 | C5 | PX  | 0.07784  | 0.00760  | 0.07265  | 0.16726  | 0.00644  |
| 69 | C5 | PY  | -0.11591 | -0.01245 | -0.00079 | 0.14539  | -0.08595 |
| 70 | C5 | PZ  | 0.00000  | 0.00000  | 0.00000  | 0.00000  | 0.00000  |
| 71 | C5 | S   | -1.12274 | -0.44307 | -1.67115 | -0.44870 | -0.95802 |
| 72 | C5 | PX  | 0.61914  | -0.71979 | 0.14460  | -0.57596 | -0.46947 |
| 73 | C5 | PY  | 0.41292  | -0.17076 | 0.58693  | -0.20408 | 0.01447  |
| 74 | C5 | PZ  | 0.00000  | 0.00000  | 0.00000  | 0.00000  | 0.00000  |
| 75 | C5 | DXX | -0.16859 | 0.14086  | -0.21494 | 0.22553  | 0.02055  |

|     |    |     |          |          |          |          |          |
|-----|----|-----|----------|----------|----------|----------|----------|
| 76  | C5 | DYY | 0.22376  | -0.13786 | -0.04598 | -0.35021 | 0.10768  |
| 77  | C5 | DZZ | -0.06676 | 0.08269  | 0.45090  | 0.14632  | 0.09098  |
| 78  | C5 | DXY | 0.12780  | -0.15753 | -0.27181 | -0.26827 | -0.11895 |
| 79  | C5 | DXZ | 0.00000  | 0.00000  | 0.00000  | 0.00000  | 0.00000  |
| 80  | C5 | DYZ | 0.00000  | 0.00000  | 0.00000  | 0.00000  | 0.00000  |
| 81  | C6 | S   | 0.03560  | -0.00397 | 0.02889  | 0.01568  | 0.03297  |
| 82  | C6 | S   | 0.52476  | -0.02148 | -0.25684 | 0.46219  | -0.30892 |
| 83  | C6 | PX  | -0.02330 | 0.16326  | 0.07921  | -0.10495 | 0.05663  |
| 84  | C6 | PY  | -0.40097 | -0.04282 | 0.12638  | -0.23903 | -0.00011 |
| 85  | C6 | PZ  | 0.00000  | 0.00000  | 0.00000  | 0.00000  | 0.00000  |
| 86  | C6 | S   | -0.95007 | 0.57949  | -1.51037 | -0.99512 | -0.52507 |
| 87  | C6 | PX  | -2.65540 | 0.85778  | -0.22479 | -1.04399 | 0.22076  |
| 88  | C6 | PY  | -1.17200 | 0.20465  | 1.39559  | -0.92208 | 0.32633  |
| 89  | C6 | PZ  | 0.00000  | 0.00000  | 0.00000  | 0.00000  | 0.00000  |
| 90  | C6 | DXX | -0.31399 | 0.39724  | -0.20977 | -0.07988 | 0.42165  |
| 91  | C6 | DYY | 0.22681  | -0.31841 | -0.01152 | 0.20551  | -0.48399 |
| 92  | C6 | DZZ | 0.05143  | 0.00339  | 0.24512  | -0.02832 | 0.19200  |
| 93  | C6 | DXY | 0.16418  | 0.07943  | 0.06386  | 0.52308  | 0.41867  |
| 94  | C6 | DXZ | 0.00000  | 0.00000  | 0.00000  | 0.00000  | 0.00000  |
| 95  | C6 | DYZ | 0.00000  | 0.00000  | 0.00000  | 0.00000  | 0.00000  |
| 96  | C7 | S   | 0.03160  | 0.01509  | -0.01163 | 0.02560  | 0.02527  |
| 97  | C7 | S   | 0.11683  | 0.15291  | 0.29685  | 0.07942  | 0.02078  |
| 98  | C7 | PX  | 0.03170  | 0.41012  | 0.02209  | 0.23103  | -0.13463 |
| 99  | C7 | PY  | -0.30416 | -0.12011 | -0.07357 | -0.27227 | 0.16294  |
| 100 | C7 | PZ  | 0.00000  | 0.00000  | 0.00000  | 0.00000  | 0.00000  |
| 101 | C7 | S   | -2.39291 | -0.99403 | -1.31882 | -1.82148 | -1.20207 |
| 102 | C7 | PX  | 1.72229  | 0.34972  | 0.71644  | 1.18299  | 0.13798  |
| 103 | C7 | PY  | 0.33382  | -0.62139 | -0.89049 | 0.02997  | -0.61554 |
| 104 | C7 | PZ  | 0.00000  | 0.00000  | 0.00000  | 0.00000  | 0.00000  |
| 105 | C7 | DXX | 0.29399  | -0.09258 | 0.14452  | 0.30127  | -0.19635 |
| 106 | C7 | DYY | -0.47797 | 0.09671  | 0.00377  | -0.44644 | 0.05955  |
| 107 | C7 | DZZ | 0.16134  | 0.04196  | -0.10314 | 0.12287  | 0.12247  |
| 108 | C7 | DXY | 0.35035  | -0.18312 | 0.10827  | 0.32852  | -0.11304 |
| 109 | C7 | DXZ | 0.00000  | 0.00000  | 0.00000  | 0.00000  | 0.00000  |
| 110 | C7 | DYZ | 0.00000  | 0.00000  | 0.00000  | 0.00000  | 0.00000  |
| 111 | H3 | S   | 0.08444  | 0.02843  | -0.07601 | -0.00187 | 0.01423  |
| 112 | H3 | S   | 0.21282  | 0.07503  | -0.14272 | -0.04132 | 0.10277  |
| 113 | H3 | PX  | 0.12149  | 0.15995  | 0.11716  | 0.10307  | 0.32832  |
| 114 | H3 | PY  | -0.21864 | -0.07406 | 0.23478  | -0.05667 | -0.10061 |
| 115 | H3 | PZ  | 0.00000  | 0.00000  | 0.00000  | 0.00000  | 0.00000  |
| 116 | H4 | S   | 0.06930  | -0.00754 | 0.08485  | 0.04890  | -0.03284 |
| 117 | H4 | S   | 0.12196  | -0.03135 | 0.11489  | 0.07752  | 0.00439  |
| 118 | H4 | PX  | -0.19353 | 0.19731  | 0.11151  | 0.31415  | 0.01347  |
| 119 | H4 | PY  | -0.20095 | 0.11918  | -0.22160 | 0.02106  | 0.09501  |
| 120 | H4 | PZ  | 0.00000  | 0.00000  | 0.00000  | 0.00000  | 0.00000  |
| 121 | N1 | S   | 0.01447  | -0.01202 | 0.00183  | 0.00615  | 0.00918  |
| 122 | N1 | S   | 0.13431  | 0.21212  | -0.12057 | -0.12232 | -0.07086 |
| 123 | N1 | PX  | -0.10501 | 0.13382  | -0.06998 | -0.06891 | 0.05901  |
| 124 | N1 | PY  | -0.04973 | -0.00269 | 0.07663  | -0.13660 | 0.05185  |
| 125 | N1 | PZ  | 0.00000  | 0.00000  | 0.00000  | 0.00000  | 0.00000  |
| 126 | N1 | S   | -1.21387 | -0.20524 | 0.56860  | -0.13166 | 0.03326  |
| 127 | N1 | PX  | 0.16704  | -0.24063 | -0.25106 | 0.42186  | 0.02039  |
| 128 | N1 | PY  | -1.60835 | 0.12980  | 1.14930  | -1.16450 | 0.51675  |
| 129 | N1 | PZ  | 0.00000  | 0.00000  | 0.00000  | 0.00000  | 0.00000  |

|     |     |     |          |          |          |          |          |
|-----|-----|-----|----------|----------|----------|----------|----------|
| 130 | N1  | DXX | 0.05878  | -0.02278 | -0.37090 | 0.43144  | 0.29892  |
| 131 | N1  | DYY | -0.27040 | 0.01200  | 0.34185  | -0.54677 | -0.13572 |
| 132 | N1  | DZZ | 0.09477  | -0.00577 | -0.00686 | 0.05066  | -0.02417 |
| 133 | N1  | DXY | -0.42377 | -0.01754 | 0.40234  | -0.24028 | 0.50544  |
| 134 | N1  | DXZ | 0.00000  | 0.00000  | 0.00000  | 0.00000  | 0.00000  |
| 135 | N1  | DYZ | 0.00000  | 0.00000  | 0.00000  | 0.00000  | 0.00000  |
| 136 | H6  | S   | 0.02994  | 0.01560  | -0.05948 | -0.04244 | -0.05017 |
| 137 | H6  | S   | 0.16892  | 0.04075  | -0.21190 | 0.09026  | 0.01045  |
| 138 | H6  | PX  | -0.12559 | 0.07214  | -0.25445 | -0.19984 | -0.10998 |
| 139 | H6  | PY  | -0.22205 | -0.04895 | -0.09113 | 0.27789  | -0.25362 |
| 140 | H6  | PZ  | 0.00000  | 0.00000  | 0.00000  | 0.00000  | 0.00000  |
| 141 | C8  | S   | -0.00963 | -0.04106 | -0.01918 | 0.03772  | -0.00445 |
| 142 | C8  | S   | -0.23524 | 0.32831  | 0.10703  | -0.45811 | -0.05951 |
| 143 | C8  | PX  | -0.03187 | 0.05416  | -0.16692 | 0.02955  | -0.00482 |
| 144 | C8  | PY  | -0.35682 | -0.37166 | -0.05181 | 0.03425  | 0.14501  |
| 145 | C8  | PZ  | 0.00000  | 0.00000  | 0.00000  | 0.00000  | 0.00000  |
| 146 | C8  | S   | 1.26253  | 0.59943  | 0.77477  | 0.18426  | 0.01231  |
| 147 | C8  | PX  | 1.79922  | -0.10886 | -0.54972 | 1.30781  | -0.37546 |
| 148 | C8  | PY  | 0.66722  | 0.61663  | 0.89622  | 0.09797  | 0.80932  |
| 149 | C8  | PZ  | 0.00000  | 0.00000  | 0.00000  | 0.00000  | 0.00000  |
| 150 | C8  | DXX | -0.17396 | -0.27988 | -0.09313 | 0.26459  | 0.38239  |
| 151 | C8  | DYY | 0.31136  | 0.49460  | 0.23928  | -0.31416 | -0.32175 |
| 152 | C8  | DZZ | -0.07638 | -0.30170 | -0.12774 | 0.25559  | -0.01243 |
| 153 | C8  | DXY | -0.08769 | 0.41237  | -0.54034 | 0.10545  | 0.05318  |
| 154 | C8  | DXZ | 0.00000  | 0.00000  | 0.00000  | 0.00000  | 0.00000  |
| 155 | C8  | DYZ | 0.00000  | 0.00000  | 0.00000  | 0.00000  | 0.00000  |
| 156 | H8  | S   | -0.07237 | -0.15894 | -0.13012 | -0.12353 | 0.14036  |
| 157 | H8  | S   | -0.37773 | -0.33238 | -0.38204 | -0.34802 | 0.09030  |
| 158 | H8  | PX  | -0.09386 | 0.50974  | 0.23870  | 0.07544  | -0.23154 |
| 159 | H8  | PY  | -0.35364 | -0.00697 | -0.07686 | -0.40334 | 0.20059  |
| 160 | H8  | PZ  | 0.00000  | 0.00000  | 0.00000  | 0.00000  | 0.00000  |
| 161 | C10 | S   | 0.03059  | 0.04314  | 0.00743  | -0.01664 | -0.02349 |
| 162 | C10 | S   | -0.20512 | -0.38286 | -0.12624 | 0.25233  | 0.20270  |
| 163 | C10 | PX  | -0.17032 | 0.25320  | -0.33737 | 0.08754  | 0.18019  |
| 164 | C10 | PY  | -0.11175 | -0.23178 | -0.02450 | 0.08453  | 0.05615  |
| 165 | C10 | PZ  | 0.00000  | 0.00000  | 0.00000  | 0.00000  | 0.00000  |
| 166 | C10 | S   | -0.06988 | -0.17063 | 0.30687  | 0.24374  | 0.80198  |
| 167 | C10 | PX  | -0.66070 | 0.18803  | -0.19731 | -0.37685 | 0.18752  |
| 168 | C10 | PY  | 0.08631  | 0.15535  | 0.25173  | -0.06297 | 0.21733  |
| 169 | C10 | PZ  | 0.00000  | 0.00000  | 0.00000  | 0.00000  | 0.00000  |
| 170 | C10 | DXX | 0.17769  | 0.29651  | 0.07036  | -0.04717 | 0.03968  |
| 171 | C10 | DYY | -0.34047 | -0.63107 | -0.19185 | 0.27335  | 0.19792  |
| 172 | C10 | DZZ | 0.21792  | 0.34571  | 0.07461  | -0.16318 | -0.18326 |
| 173 | C10 | DXY | -0.07733 | -0.05894 | -0.01310 | -0.01545 | -0.03749 |
| 174 | C10 | DXZ | 0.00000  | 0.00000  | 0.00000  | 0.00000  | 0.00000  |
| 175 | C10 | DYZ | 0.00000  | 0.00000  | 0.00000  | 0.00000  | 0.00000  |
| 176 | H16 | S   | 0.12676  | -0.02277 | 0.14841  | -0.07009 | -0.17748 |
| 177 | H16 | S   | 0.36952  | 0.02822  | 0.30165  | -0.02791 | -0.20534 |
| 178 | H16 | PX  | -0.27041 | -0.21083 | -0.31556 | 0.25104  | 0.28307  |
| 179 | H16 | PY  | 0.03922  | -0.29136 | 0.24491  | -0.08649 | -0.18474 |
| 180 | H16 | PZ  | 0.00000  | 0.00000  | 0.00000  | 0.00000  | 0.00000  |
| 181 | H18 | S   | -0.04755 | 0.14403  | -0.11938 | -0.06214 | -0.04428 |
| 182 | H18 | S   | -0.21612 | 0.33750  | -0.11315 | -0.22557 | 0.04895  |
| 183 | H18 | PX  | 0.06885  | 0.49516  | -0.10027 | -0.15058 | -0.06845 |

|     |     |    |          |         |          |         |         |
|-----|-----|----|----------|---------|----------|---------|---------|
| 184 | H18 | PY | -0.18021 | 0.01090 | -0.26191 | 0.05852 | 0.02625 |
| 185 | H18 | PZ | 0.00000  | 0.00000 | 0.00000  | 0.00000 | 0.00000 |

|              |  |          |          |           |           |           |
|--------------|--|----------|----------|-----------|-----------|-----------|
| MO:          |  | 166      | 167      | 168       | 169       | 170       |
| Eigenvalues: |  | 3.54727  | 3.62575  | 3.69588   | 3.72333   | 3.78343   |
| (ev):        |  | 96.52618 | 98.66173 | 100.57002 | 101.31713 | 102.95245 |

|    |    |     | A        | A        | A        | A        | A        |
|----|----|-----|----------|----------|----------|----------|----------|
| 1  | H1 | S   | 0.19929  | 0.31260  | 0.37230  | 0.15946  | -0.00208 |
| 2  | H1 | S   | 0.14116  | 0.24642  | 0.21759  | 0.16398  | -0.00950 |
| 3  | H1 | PX  | -0.42429 | -0.49980 | -0.56892 | -0.21944 | -0.00054 |
| 4  | H1 | PY  | -0.00630 | -0.03664 | -0.04023 | 0.17623  | 0.24033  |
| 5  | H1 | PZ  | 0.00000  | 0.00000  | 0.00000  | 0.00000  | 0.00000  |
| 6  | C1 | S   | 0.03496  | 0.01121  | 0.01578  | 0.00113  | 0.01121  |
| 7  | C1 | S   | -0.03505 | -0.23979 | -0.22025 | -0.00092 | 0.08178  |
| 8  | C1 | PX  | -0.31594 | -0.26166 | -0.29377 | -0.19065 | -0.05725 |
| 9  | C1 | PY  | 0.01901  | -0.10225 | -0.12548 | 0.10104  | 0.23689  |
| 10 | C1 | PZ  | 0.00000  | 0.00000  | 0.00000  | 0.00000  | 0.00000  |
| 11 | C1 | S   | -0.63181 | 0.00643  | -0.26220 | -0.18162 | -0.24905 |
| 12 | C1 | PX  | 0.35182  | -0.28212 | -0.10134 | -0.20973 | 0.13035  |
| 13 | C1 | PY  | -0.96076 | 0.11780  | 0.22997  | -0.32517 | -0.71151 |
| 14 | C1 | PZ  | 0.00000  | 0.00000  | 0.00000  | 0.00000  | 0.00000  |
| 15 | C1 | DXX | -0.10523 | -0.33369 | -0.43654 | -0.12306 | 0.08508  |
| 16 | C1 | DYY | 0.00736  | 0.17356  | 0.22088  | 0.11572  | -0.03551 |
| 17 | C1 | DZZ | 0.19440  | 0.09957  | 0.13302  | 0.00093  | 0.02099  |
| 18 | C1 | DXY | -0.01677 | 0.05598  | 0.00634  | -0.31369 | -0.46100 |
| 19 | C1 | DXZ | 0.00000  | 0.00000  | 0.00000  | 0.00000  | 0.00000  |
| 20 | C1 | DYZ | 0.00000  | 0.00000  | 0.00000  | 0.00000  | 0.00000  |
| 21 | C2 | S   | -0.04293 | 0.01436  | -0.01050 | -0.00275 | -0.01414 |
| 22 | C2 | S   | 0.02680  | -0.16649 | 0.24096  | 0.00538  | -0.09589 |
| 23 | C2 | PX  | -0.29112 | 0.27086  | -0.33669 | -0.17252 | -0.05847 |
| 24 | C2 | PY  | -0.13189 | -0.03885 | 0.18035  | -0.14951 | -0.31280 |
| 25 | C2 | PZ  | 0.00000  | 0.00000  | 0.00000  | 0.00000  | 0.00000  |
| 26 | C2 | S   | 0.87199  | -0.22163 | 0.24772  | 0.12844  | 0.56538  |
| 27 | C2 | PX  | 0.67767  | 0.00834  | -0.09036 | -0.24127 | 0.34276  |
| 28 | C2 | PY  | 1.36433  | -0.33763 | -0.15434 | 0.32363  | 0.84374  |
| 29 | C2 | PZ  | 0.00000  | 0.00000  | 0.00000  | 0.00000  | 0.00000  |
| 30 | C2 | DXX | 0.05837  | -0.28006 | 0.45278  | 0.16649  | 0.03517  |
| 31 | C2 | DYY | 0.00431  | 0.12080  | -0.21889 | -0.15567 | -0.05528 |
| 32 | C2 | DZZ | -0.23268 | 0.10525  | -0.11598 | -0.00870 | -0.02902 |
| 33 | C2 | DXY | -0.14082 | -0.03806 | 0.24193  | -0.34671 | -0.57960 |
| 34 | C2 | DXZ | 0.00000  | 0.00000  | 0.00000  | 0.00000  | 0.00000  |
| 35 | C2 | DYZ | 0.00000  | 0.00000  | 0.00000  | 0.00000  | 0.00000  |
| 36 | C3 | S   | -0.06065 | 0.01669  | -0.02498 | 0.01253  | -0.03615 |
| 37 | C3 | S   | -0.40806 | 0.01497  | -0.02656 | 0.13810  | 0.06888  |
| 38 | C3 | PX  | -0.16093 | -0.02596 | -0.03724 | 0.14569  | 0.24625  |
| 39 | C3 | PY  | 0.20294  | -0.04771 | -0.09970 | -0.04197 | -0.00388 |
| 40 | C3 | PZ  | 0.00000  | 0.00000  | 0.00000  | 0.00000  | 0.00000  |
| 41 | C3 | S   | 4.17211  | -0.84778 | 0.86146  | -0.76839 | 1.41301  |
| 42 | C3 | PX  | -2.76744 | 0.42856  | -0.02928 | 0.23215  | -0.99482 |
| 43 | C3 | PY  | -1.29753 | 0.12760  | -0.13553 | -0.03559 | -0.89633 |
| 44 | C3 | PZ  | 0.00000  | 0.00000  | 0.00000  | 0.00000  | 0.00000  |
| 45 | C3 | DXX | 0.53988  | -0.02537 | -0.03605 | -0.26409 | -0.35432 |
| 46 | C3 | DYY | -0.36991 | -0.00004 | 0.07181  | 0.22946  | 0.38132  |

|     |    |     |          |          |          |          |          |
|-----|----|-----|----------|----------|----------|----------|----------|
| 47  | C3 | DZZ | -0.21003 | 0.05270  | -0.13678 | 0.03766  | -0.17464 |
| 48  | C3 | DXY | 0.14459  | -0.03596 | -0.18655 | -0.14509 | 0.08231  |
| 49  | C3 | DXZ | 0.00000  | 0.00000  | 0.00000  | 0.00000  | 0.00000  |
| 50  | C3 | DYZ | 0.00000  | 0.00000  | 0.00000  | 0.00000  | 0.00000  |
| 51  | C4 | S   | -0.02329 | 0.03745  | 0.01467  | 0.01647  | -0.00709 |
| 52  | C4 | S   | 0.02644  | -0.34147 | -0.22111 | -0.17365 | -0.08678 |
| 53  | C4 | PX  | -0.10878 | -0.17564 | -0.14612 | -0.27536 | -0.22811 |
| 54  | C4 | PY  | 0.00754  | -0.49872 | -0.29661 | -0.06461 | 0.13858  |
| 55  | C4 | PZ  | 0.00000  | 0.00000  | 0.00000  | 0.00000  | 0.00000  |
| 56  | C4 | S   | 0.83767  | -0.50604 | 0.02048  | -0.31238 | 0.29034  |
| 57  | C4 | PX  | 0.56183  | -0.22863 | -0.42373 | 0.37640  | 0.60492  |
| 58  | C4 | PY  | -0.72697 | -0.12437 | -0.27799 | -0.28656 | -0.51560 |
| 59  | C4 | PZ  | 0.00000  | 0.00000  | 0.00000  | 0.00000  | 0.00000  |
| 60  | C4 | DXX | 0.27319  | 0.06584  | 0.02047  | 0.26313  | 0.29188  |
| 61  | C4 | DYY | -0.21300 | -0.31786 | -0.16732 | -0.40710 | -0.36302 |
| 62  | C4 | DZZ | -0.12001 | 0.24004  | 0.12877  | 0.14115  | 0.00794  |
| 63  | C4 | DXY | 0.14672  | -0.42960 | -0.37151 | 0.03688  | 0.26485  |
| 64  | C4 | DXZ | 0.00000  | 0.00000  | 0.00000  | 0.00000  | 0.00000  |
| 65  | C4 | DYZ | 0.00000  | 0.00000  | 0.00000  | 0.00000  | 0.00000  |
| 66  | C5 | S   | 0.02583  | 0.03076  | -0.02467 | -0.00843 | 0.01087  |
| 67  | C5 | S   | -0.10727 | -0.33205 | 0.23788  | 0.14348  | 0.06925  |
| 68  | C5 | PX  | -0.09161 | 0.23462  | -0.18968 | -0.26449 | -0.22718 |
| 69  | C5 | PY  | -0.10581 | -0.42795 | 0.41669  | -0.02974 | -0.20947 |
| 70  | C5 | PZ  | 0.00000  | 0.00000  | 0.00000  | 0.00000  | 0.00000  |
| 71  | C5 | S   | -1.29631 | -0.08167 | 0.03517  | 0.23514  | -0.54784 |
| 72  | C5 | PX  | 0.72863  | -0.02125 | -0.44720 | 0.37371  | 0.64862  |
| 73  | C5 | PY  | 0.70797  | -0.42198 | 0.27893  | 0.30643  | 0.58022  |
| 74  | C5 | PZ  | 0.00000  | 0.00000  | 0.00000  | 0.00000  | 0.00000  |
| 75  | C5 | DXX | -0.31144 | 0.10548  | 0.04116  | -0.24986 | -0.31649 |
| 76  | C5 | DYY | 0.26958  | -0.31890 | 0.09854  | 0.38330  | 0.42169  |
| 77  | C5 | DZZ | 0.13157  | 0.20666  | -0.17792 | -0.09780 | 0.00302  |
| 78  | C5 | DXY | 0.18737  | 0.38318  | -0.49517 | 0.03614  | 0.25202  |
| 79  | C5 | DXZ | 0.00000  | 0.00000  | 0.00000  | 0.00000  | 0.00000  |
| 80  | C5 | DYZ | 0.00000  | 0.00000  | 0.00000  | 0.00000  | 0.00000  |
| 81  | C6 | S   | 0.06913  | 0.00517  | 0.00068  | -0.00258 | 0.01829  |
| 82  | C6 | S   | 0.46877  | -0.13601 | 0.11234  | -0.12774 | -0.06467 |
| 83  | C6 | PX  | -0.21107 | 0.03272  | -0.03642 | 0.15715  | 0.17931  |
| 84  | C6 | PY  | -0.41393 | 0.03436  | 0.11183  | 0.03295  | -0.02282 |
| 85  | C6 | PZ  | 0.00000  | 0.00000  | 0.00000  | 0.00000  | 0.00000  |
| 86  | C6 | S   | -2.10320 | 0.07274  | -0.28463 | 0.43288  | -0.75468 |
| 87  | C6 | PX  | -3.40082 | 0.57973  | -0.05225 | 0.18043  | -1.11371 |
| 88  | C6 | PY  | -0.20494 | -0.04959 | -0.12628 | 0.31209  | 0.14102  |
| 89  | C6 | PZ  | 0.00000  | 0.00000  | 0.00000  | 0.00000  | 0.00000  |
| 90  | C6 | DXX | -0.51797 | 0.06935  | -0.06476 | 0.31289  | 0.38819  |
| 91  | C6 | DYY | 0.43976  | -0.02611 | 0.02890  | -0.29982 | -0.43817 |
| 92  | C6 | DZZ | 0.19550  | 0.03601  | 0.01711  | 0.02648  | 0.08392  |
| 93  | C6 | DXY | 0.26381  | -0.01003 | -0.28319 | -0.04829 | 0.29077  |
| 94  | C6 | DXZ | 0.00000  | 0.00000  | 0.00000  | 0.00000  | 0.00000  |
| 95  | C6 | DYZ | 0.00000  | 0.00000  | 0.00000  | 0.00000  | 0.00000  |
| 96  | C7 | S   | 0.02500  | 0.00203  | 0.03704  | -0.04848 | 0.01372  |
| 97  | C7 | S   | 0.36116  | -0.14235 | -0.13561 | 0.07556  | -0.02796 |
| 98  | C7 | PX  | 0.13167  | -0.05748 | -0.12692 | 0.17981  | 0.09664  |
| 99  | C7 | PY  | 0.19447  | 0.00054  | -0.03257 | -0.21284 | -0.12537 |
| 100 | C7 | PZ  | 0.00000  | 0.00000  | 0.00000  | 0.00000  | 0.00000  |



|     |    |     |          |          |          |          |          |
|-----|----|-----|----------|----------|----------|----------|----------|
| 101 | C7 | S   | -2.95775 | 0.52761  | -0.99876 | 0.98802  | -1.11660 |
| 102 | C7 | PX  | 2.08368  | -0.43144 | 0.31465  | -0.25686 | 0.75910  |
| 103 | C7 | PY  | 0.10740  | 0.06396  | -0.02317 | -0.30635 | -0.14160 |
| 104 | C7 | PZ  | 0.00000  | 0.00000  | 0.00000  | 0.00000  | 0.00000  |
| 105 | C7 | DXX | -0.24827 | -0.00753 | -0.09056 | 0.21784  | 0.11434  |
| 106 | C7 | DYY | 0.17338  | 0.04987  | -0.01529 | -0.22031 | -0.21121 |
| 107 | C7 | DZZ | 0.04149  | 0.02669  | 0.21137  | -0.23382 | 0.06821  |
| 108 | C7 | DXY | -0.43494 | 0.06041  | 0.11954  | 0.03340  | 0.16858  |
| 109 | C7 | DXZ | 0.00000  | 0.00000  | 0.00000  | 0.00000  | 0.00000  |
| 110 | C7 | DYZ | 0.00000  | 0.00000  | 0.00000  | 0.00000  | 0.00000  |
| 111 | H3 | S   | 0.02048  | 0.54539  | 0.37102  | 0.24814  | 0.04926  |
| 112 | H3 | S   | 0.08450  | 0.40519  | 0.32970  | 0.17702  | 0.06765  |
| 113 | H3 | PX  | -0.19687 | -0.33972 | -0.10980 | -0.30026 | -0.25063 |
| 114 | H3 | PY  | 0.09069  | -0.83254 | -0.54938 | -0.26326 | 0.05860  |
| 115 | H3 | PZ  | 0.00000  | 0.00000  | 0.00000  | 0.00000  | 0.00000  |
| 116 | H4 | S   | 0.09002  | 0.50698  | -0.45953 | -0.18032 | -0.00524 |
| 117 | H4 | S   | 0.08449  | 0.40309  | -0.39979 | -0.13379 | -0.00934 |
| 118 | H4 | PX  | -0.15184 | 0.45008  | -0.20691 | -0.27156 | -0.23244 |
| 119 | H4 | PY  | -0.25618 | -0.69774 | 0.67507  | 0.14957  | -0.12953 |
| 120 | H4 | PZ  | 0.00000  | 0.00000  | 0.00000  | 0.00000  | 0.00000  |
| 121 | N1 | S   | -0.00867 | 0.00525  | -0.00190 | -0.01432 | 0.04032  |
| 122 | N1 | S   | -0.04785 | -0.08667 | 0.09092  | 0.16837  | -0.03542 |
| 123 | N1 | PX  | -0.02964 | 0.00733  | -0.00422 | 0.06359  | 0.03255  |
| 124 | N1 | PY  | -0.15740 | -0.00093 | 0.08664  | 0.07106  | 0.10700  |
| 125 | N1 | PZ  | 0.00000  | 0.00000  | 0.00000  | 0.00000  | 0.00000  |
| 126 | N1 | S   | -0.15696 | 0.24117  | -0.09068 | -0.05567 | -0.52834 |
| 127 | N1 | PX  | 0.60147  | 0.00264  | -0.07990 | -0.12925 | 0.07256  |
| 128 | N1 | PY  | -1.54851 | 0.23525  | -0.04485 | 0.26101  | 0.08527  |
| 129 | N1 | PZ  | 0.00000  | 0.00000  | 0.00000  | 0.00000  | 0.00000  |
| 130 | N1 | DXX | 0.27477  | 0.00884  | -0.12465 | -0.09344 | 0.28417  |
| 131 | N1 | DYY | -0.36522 | 0.09359  | 0.11420  | 0.01749  | -0.06940 |
| 132 | N1 | DZZ | -0.02307 | 0.00207  | 0.00032  | -0.04749 | 0.12026  |
| 133 | N1 | DXY | -0.53248 | 0.02839  | -0.04816 | 0.19051  | 0.39847  |
| 134 | N1 | DXZ | 0.00000  | 0.00000  | 0.00000  | 0.00000  | 0.00000  |
| 135 | N1 | DYZ | 0.00000  | 0.00000  | 0.00000  | 0.00000  | 0.00000  |
| 136 | H6 | S   | -0.11853 | 0.26492  | -0.39071 | -0.15597 | 0.00293  |
| 137 | H6 | S   | 0.02024  | 0.16395  | -0.24530 | -0.14821 | 0.09171  |
| 138 | H6 | PX  | -0.35776 | 0.46542  | -0.62525 | -0.19180 | -0.00874 |
| 139 | H6 | PY  | -0.10921 | 0.05576  | 0.04389  | -0.22171 | -0.29369 |
| 140 | H6 | PZ  | 0.00000  | 0.00000  | 0.00000  | 0.00000  | 0.00000  |
| 141 | C8 | S   | -0.01281 | 0.00394  | -0.02988 | 0.04906  | -0.03066 |
| 142 | C8 | S   | -0.22456 | 0.02008  | -0.02205 | 0.12402  | -0.22115 |
| 143 | C8 | PX  | 0.32005  | -0.01506 | -0.02188 | -0.09536 | -0.08344 |
| 144 | C8 | PY  | -0.15121 | 0.00823  | 0.04720  | -0.14264 | 0.22127  |
| 145 | C8 | PZ  | 0.00000  | 0.00000  | 0.00000  | 0.00000  | 0.00000  |
| 146 | C8 | S   | 0.76611  | -0.23245 | 0.91722  | -1.30028 | 1.37025  |
| 147 | C8 | PX  | 1.86570  | -0.23655 | 0.32899  | -0.57046 | 0.08155  |
| 148 | C8 | PY  | 1.17629  | -0.36989 | -0.04426 | 0.51055  | 0.03199  |
| 149 | C8 | PZ  | 0.00000  | 0.00000  | 0.00000  | 0.00000  | 0.00000  |
| 150 | C8 | DXX | 0.00778  | -0.02722 | -0.06968 | 0.01598  | 0.28781  |
| 151 | C8 | DYY | 0.06687  | 0.00363  | 0.03658  | 0.10108  | -0.31739 |
| 152 | C8 | DZZ | -0.00403 | 0.00767  | -0.14330 | 0.21747  | -0.12876 |
| 153 | C8 | DXY | 0.51769  | -0.02261 | 0.01682  | -0.12069 | -0.09119 |
| 154 | C8 | DXZ | 0.00000  | 0.00000  | 0.00000  | 0.00000  | 0.00000  |

|     |     |     |          |          |          |          |          |
|-----|-----|-----|----------|----------|----------|----------|----------|
| 155 | C8  | DYZ | 0.00000  | 0.00000  | 0.00000  | 0.00000  | 0.00000  |
| 156 | H8  | S   | -0.13179 | 0.07691  | 0.17820  | -0.23725 | -0.03135 |
| 157 | H8  | S   | -0.52537 | 0.14028  | 0.03733  | -0.14474 | -0.22992 |
| 158 | H8  | PX  | 0.16804  | -0.08641 | -0.25173 | 0.29484  | -0.02498 |
| 159 | H8  | PY  | 0.09913  | 0.02785  | 0.07758  | -0.14574 | -0.13596 |
| 160 | H8  | PZ  | 0.00000  | 0.00000  | 0.00000  | 0.00000  | 0.00000  |
| 161 | C10 | S   | 0.00055  | 0.00384  | 0.03658  | -0.08374 | 0.07049  |
| 162 | C10 | S   | 0.02612  | -0.04401 | -0.21470 | 0.46573  | -0.32505 |
| 163 | C10 | PX  | 0.36630  | -0.02407 | -0.05531 | -0.18136 | 0.03292  |
| 164 | C10 | PY  | -0.06161 | 0.01805  | 0.13436  | -0.38983 | 0.44107  |
| 165 | C10 | PZ  | 0.00000  | 0.00000  | 0.00000  | 0.00000  | 0.00000  |
| 166 | C10 | S   | 0.69723  | -0.23932 | -0.61033 | 1.46613  | -0.98182 |
| 167 | C10 | PX  | -0.27519 | 0.05217  | -0.17705 | 0.10389  | -0.05229 |
| 168 | C10 | PY  | 0.21645  | -0.05637 | -0.11000 | 0.25074  | -0.08473 |
| 169 | C10 | PZ  | 0.00000  | 0.00000  | 0.00000  | 0.00000  | 0.00000  |
| 170 | C10 | DXX | 0.03240  | -0.03548 | -0.22935 | 0.62584  | -0.52658 |
| 171 | C10 | DYY | -0.06507 | 0.01704  | 0.07767  | -0.34991 | 0.44732  |
| 172 | C10 | DZZ | 0.02137  | 0.02515  | 0.23187  | -0.51318 | 0.38636  |
| 173 | C10 | DXY | -0.20779 | 0.02623  | 0.09016  | 0.06524  | 0.08218  |
| 174 | C10 | DXZ | 0.00000  | 0.00000  | 0.00000  | 0.00000  | 0.00000  |
| 175 | C10 | DYZ | 0.00000  | 0.00000  | 0.00000  | 0.00000  | 0.00000  |
| 176 | H16 | S   | -0.17989 | 0.03772  | 0.24128  | -0.34319 | 0.34631  |
| 177 | H16 | S   | -0.04822 | 0.00863  | 0.18129  | -0.25153 | 0.25110  |
| 178 | H16 | PX  | 0.25739  | -0.05010 | -0.24295 | 0.30576  | -0.31171 |
| 179 | H16 | PY  | -0.27707 | 0.04511  | 0.23717  | -0.41000 | 0.41411  |
| 180 | H16 | PZ  | 0.00000  | 0.00000  | 0.00000  | 0.00000  | 0.00000  |
| 181 | H18 | S   | 0.12973  | 0.01688  | 0.12348  | -0.51295 | 0.32499  |
| 182 | H18 | S   | -0.00395 | 0.03630  | 0.04001  | -0.28306 | 0.22572  |
| 183 | H18 | PX  | 0.24940  | 0.01640  | 0.15351  | -0.61504 | 0.36059  |
| 184 | H18 | PY  | 0.16941  | 0.01452  | 0.15910  | -0.50812 | 0.36662  |
| 185 | H18 | PZ  | 0.00000  | 0.00000  | 0.00000  | 0.00000  | 0.00000  |

|              |           |           |           |           |           |
|--------------|-----------|-----------|-----------|-----------|-----------|
| MO:          | 171       | 172       | 173       | 174       | 175       |
| Eigenvalues: | 3.88398   | 3.98232   | 4.02097   | 4.25472   | 4.46388   |
| (ev):        | 105.68842 | 108.36459 | 109.41620 | 115.77675 | 121.46844 |

|    |    | A   | A        | A        | A        | A        |          |
|----|----|-----|----------|----------|----------|----------|----------|
| 1  | H1 | S   | 0.59034  | 0.05615  | 0.05647  | 0.42830  | 0.07508  |
| 2  | H1 | S   | 0.39235  | -0.07394 | -0.01733 | 0.28936  | 0.11206  |
| 3  | H1 | PX  | -0.76336 | -0.08529 | -0.07023 | -0.46160 | -0.02514 |
| 4  | H1 | PY  | -0.06689 | 0.10558  | 0.00531  | -0.07468 | -0.03939 |
| 5  | H1 | PZ  | 0.00000  | 0.00000  | 0.00000  | 0.00000  | 0.00000  |
| 6  | C1 | S   | 0.06418  | 0.04317  | 0.03132  | 0.07110  | -0.07626 |
| 7  | C1 | S   | -0.34516 | -0.09970 | -0.07621 | -0.36666 | 0.39465  |
| 8  | C1 | PX  | -0.46223 | -0.03457 | -0.02877 | -0.31267 | -0.01946 |
| 9  | C1 | PY  | 0.01129  | 0.20484  | 0.11593  | 0.05771  | -0.10133 |
| 10 | C1 | PZ  | 0.00000  | 0.00000  | 0.00000  | 0.00000  | 0.00000  |
| 11 | C1 | S   | -0.62372 | -0.79347 | -0.54824 | -0.28202 | 0.45218  |
| 12 | C1 | PX  | -0.30999 | 0.41614  | 0.23188  | -0.35629 | -0.44302 |
| 13 | C1 | PY  | 0.02359  | -0.19158 | 0.05157  | 0.08527  | 0.34701  |
| 14 | C1 | PZ  | 0.00000  | 0.00000  | 0.00000  | 0.00000  | 0.00000  |
| 15 | C1 | DXX | -0.63061 | 0.00177  | -0.01493 | -0.44538 | -0.26257 |
| 16 | C1 | DYY | 0.59294  | 0.06387  | 0.08342  | 0.82106  | -0.20371 |
| 17 | C1 | DZZ | 0.37581  | 0.17795  | 0.12727  | 0.32592  | -0.28311 |

|    |    |     |          |          |          |          |          |
|----|----|-----|----------|----------|----------|----------|----------|
| 18 | C1 | DXY | -0.05641 | -0.29967 | -0.11061 | -0.03350 | 0.11796  |
| 19 | C1 | DXZ | 0.00000  | 0.00000  | 0.00000  | 0.00000  | 0.00000  |
| 20 | C1 | DYZ | 0.00000  | 0.00000  | 0.00000  | 0.00000  | 0.00000  |
| 21 | C2 | S   | 0.06603  | -0.00960 | -0.02362 | -0.07581 | -0.10285 |
| 22 | C2 | S   | -0.37893 | -0.02346 | 0.06421  | 0.38150  | 0.70404  |
| 23 | C2 | PX  | 0.47143  | -0.00026 | -0.06725 | -0.31610 | 0.04109  |
| 24 | C2 | PY  | 0.05203  | -0.05130 | -0.08057 | -0.10813 | -0.07035 |
| 25 | C2 | PZ  | 0.00000  | 0.00000  | 0.00000  | 0.00000  | 0.00000  |
| 26 | C2 | S   | -0.64883 | 0.30250  | 0.33791  | 0.45894  | 0.13882  |
| 27 | C2 | PX  | 0.30034  | 0.24266  | 0.23989  | -0.25976 | 0.03217  |
| 28 | C2 | PY  | -0.03625 | 0.37484  | 0.16118  | -0.07416 | -0.00899 |
| 29 | C2 | PZ  | 0.00000  | 0.00000  | 0.00000  | 0.00000  | 0.00000  |
| 30 | C2 | DXX | -0.63932 | -0.03137 | 0.09317  | 0.43778  | -0.42584 |
| 31 | C2 | DYY | 0.59466  | 0.01699  | -0.13671 | -0.82421 | -0.40407 |
| 32 | C2 | DZZ | 0.38776  | -0.02897 | -0.10625 | -0.34314 | -0.40358 |
| 33 | C2 | DXY | -0.08102 | -0.04900 | -0.04400 | 0.05957  | -0.08131 |
| 34 | C2 | DXZ | 0.00000  | 0.00000  | 0.00000  | 0.00000  | 0.00000  |
| 35 | C2 | DYZ | 0.00000  | 0.00000  | 0.00000  | 0.00000  | 0.00000  |
| 36 | C3 | S   | -0.02014 | -0.08595 | -0.04896 | 0.02343  | -0.23305 |
| 37 | C3 | S   | 0.06905  | 0.18835  | -0.05620 | -0.09635 | 1.56394  |
| 38 | C3 | PX  | -0.04090 | 0.01142  | -0.04680 | 0.02487  | -0.03944 |
| 39 | C3 | PY  | -0.11900 | -0.01875 | 0.08525  | -0.16670 | -0.04418 |
| 40 | C3 | PZ  | 0.00000  | 0.00000  | 0.00000  | 0.00000  | 0.00000  |
| 41 | C3 | S   | 0.23046  | 2.32965  | 1.99853  | -0.13560 | 0.25003  |
| 42 | C3 | PX  | 0.13417  | -0.52148 | -0.35558 | 0.36216  | 0.52545  |
| 43 | C3 | PY  | -0.05941 | -0.58608 | -0.36894 | -0.21081 | 0.08535  |
| 44 | C3 | PZ  | 0.00000  | 0.00000  | 0.00000  | 0.00000  | 0.00000  |
| 45 | C3 | DXX | -0.14872 | -0.41568 | -0.16521 | -0.11920 | -0.82759 |
| 46 | C3 | DYY | 0.09105  | 0.27408  | 0.04851  | 0.20472  | -0.95089 |
| 47 | C3 | DZZ | -0.10848 | -0.38913 | -0.19068 | 0.08222  | -0.92920 |
| 48 | C3 | DXY | -0.17410 | 0.28146  | 0.19780  | -0.44109 | -0.00883 |
| 49 | C3 | DXZ | 0.00000  | 0.00000  | 0.00000  | 0.00000  | 0.00000  |
| 50 | C3 | DYZ | 0.00000  | 0.00000  | 0.00000  | 0.00000  | 0.00000  |
| 51 | C4 | S   | -0.05028 | -0.02647 | -0.02028 | -0.04782 | 0.02433  |
| 52 | C4 | S   | 0.27790  | 0.00009  | 0.01389  | 0.20908  | -0.00810 |
| 53 | C4 | PX  | -0.03009 | -0.03395 | 0.04568  | 0.12753  | 0.02620  |
| 54 | C4 | PY  | 0.27500  | 0.16671  | 0.14314  | 0.33746  | -0.05693 |
| 55 | C4 | PZ  | 0.00000  | 0.00000  | 0.00000  | 0.00000  | 0.00000  |
| 56 | C4 | S   | 0.36015  | 0.78649  | 0.53193  | 0.31824  | -0.76093 |
| 57 | C4 | PX  | 0.10540  | 0.12401  | -0.05612 | 0.03584  | -0.04416 |
| 58 | C4 | PY  | 0.14098  | -0.38512 | -0.16387 | 0.33416  | 0.39589  |
| 59 | C4 | PZ  | 0.00000  | 0.00000  | 0.00000  | 0.00000  | 0.00000  |
| 60 | C4 | DXX | -0.28760 | -0.01186 | -0.08480 | -0.59997 | 0.05103  |
| 61 | C4 | DYY | 0.23842  | -0.04272 | 0.08947  | 0.39016  | 0.07771  |
| 62 | C4 | DZZ | -0.26456 | -0.10897 | -0.10199 | -0.24349 | 0.08540  |
| 63 | C4 | DXY | 0.27674  | 0.20446  | 0.20279  | 0.59986  | -0.04829 |
| 64 | C4 | DXZ | 0.00000  | 0.00000  | 0.00000  | 0.00000  | 0.00000  |
| 65 | C4 | DYZ | 0.00000  | 0.00000  | 0.00000  | 0.00000  | 0.00000  |
| 66 | C5 | S   | -0.04957 | 0.00915  | 0.01832  | 0.04255  | 0.00110  |
| 67 | C5 | S   | 0.27709  | 0.01675  | -0.06554 | -0.15875 | -0.02869 |
| 68 | C5 | PX  | -0.00546 | -0.01214 | 0.03572  | 0.15230  | -0.02976 |
| 69 | C5 | PY  | 0.26320  | -0.04591 | -0.11770 | -0.32178 | -0.04637 |
| 70 | C5 | PZ  | 0.00000  | 0.00000  | 0.00000  | 0.00000  | 0.00000  |
| 71 | C5 | S   | 0.38019  | -0.59832 | -0.55902 | -0.41161 | 0.16381  |

|     |    |     |          |          |          |          |          |
|-----|----|-----|----------|----------|----------|----------|----------|
| 72  | C5 | PX  | -0.18784 | 0.10552  | 0.00668  | 0.08554  | 0.06845  |
| 73  | C5 | PY  | 0.10074  | 0.34149  | 0.08338  | -0.28855 | -0.20530 |
| 74  | C5 | PZ  | 0.00000  | 0.00000  | 0.00000  | 0.00000  | 0.00000  |
| 75  | C5 | DXX | -0.27194 | -0.05049 | 0.07775  | 0.48639  | 0.03665  |
| 76  | C5 | DYY | 0.22823  | 0.02425  | -0.05683 | -0.31855 | 0.07830  |
| 77  | C5 | DZZ | -0.26365 | 0.03848  | 0.09234  | 0.21941  | 0.00162  |
| 78  | C5 | DXY | -0.30605 | 0.08768  | 0.21125  | 0.68704  | 0.02356  |
| 79  | C5 | DXZ | 0.00000  | 0.00000  | 0.00000  | 0.00000  | 0.00000  |
| 80  | C5 | DYZ | 0.00000  | 0.00000  | 0.00000  | 0.00000  | 0.00000  |
| 81  | C6 | S   | -0.02084 | 0.00504  | 0.01628  | -0.01357 | -0.17415 |
| 82  | C6 | S   | 0.06277  | 0.11397  | 0.15550  | 0.03019  | 1.05593  |
| 83  | C6 | PX  | 0.06151  | 0.10376  | -0.04615 | 0.01617  | 0.11900  |
| 84  | C6 | PY  | -0.11070 | 0.03590  | -0.11035 | 0.16472  | 0.19743  |
| 85  | C6 | PZ  | 0.00000  | 0.00000  | 0.00000  | 0.00000  | 0.00000  |
| 86  | C6 | S   | 0.34788  | -0.96863 | -0.57361 | 0.03931  | 2.10205  |
| 87  | C6 | PX  | -0.06300 | -0.72095 | -0.71702 | 0.40513  | 0.02730  |
| 88  | C6 | PY  | -0.13085 | 0.29444  | -0.18641 | 0.15700  | -1.01721 |
| 89  | C6 | PZ  | 0.00000  | 0.00000  | 0.00000  | 0.00000  | 0.00000  |
| 90  | C6 | DXX | -0.14449 | -0.01576 | 0.04044  | 0.21402  | -0.58775 |
| 91  | C6 | DYY | 0.08675  | -0.08555 | 0.01676  | -0.24109 | -0.83274 |
| 92  | C6 | DZZ | -0.11561 | 0.02508  | 0.01984  | -0.02634 | -0.68537 |
| 93  | C6 | DXY | 0.12266  | 0.04862  | 0.15355  | -0.37847 | -0.11895 |
| 94  | C6 | DXZ | 0.00000  | 0.00000  | 0.00000  | 0.00000  | 0.00000  |
| 95  | C6 | DYZ | 0.00000  | 0.00000  | 0.00000  | 0.00000  | 0.00000  |
| 96  | C7 | S   | -0.00221 | 0.11860  | 0.09284  | -0.04129 | -0.16804 |
| 97  | C7 | S   | -0.06143 | -0.50894 | -0.38771 | 0.19465  | 1.16955  |
| 98  | C7 | PX  | 0.09793  | -0.51158 | -0.09702 | 0.08760  | -0.06287 |
| 99  | C7 | PY  | -0.13547 | 0.02873  | 0.18409  | -0.21577 | 0.14217  |
| 100 | C7 | PZ  | 0.00000  | 0.00000  | 0.00000  | 0.00000  | 0.00000  |
| 101 | C7 | S   | -0.02249 | -2.35246 | -1.93986 | 0.01880  | 0.25270  |
| 102 | C7 | PX  | -0.00130 | 0.54071  | 0.70653  | 0.08710  | 0.00926  |
| 103 | C7 | PY  | -0.04627 | -0.22219 | -0.17838 | -0.22583 | -0.37670 |
| 104 | C7 | PZ  | 0.00000  | 0.00000  | 0.00000  | 0.00000  | 0.00000  |
| 105 | C7 | DXX | 0.14484  | -0.38889 | -0.35298 | 0.11943  | -0.74651 |
| 106 | C7 | DYY | -0.13173 | 0.44292  | 0.45946  | -0.39601 | -0.56063 |
| 107 | C7 | DZZ | -0.01335 | 0.62636  | 0.42693  | -0.17084 | -0.66489 |
| 108 | C7 | DXY | 0.00927  | 0.79797  | 0.11895  | -0.04265 | -0.01335 |
| 109 | C7 | DXZ | 0.00000  | 0.00000  | 0.00000  | 0.00000  | 0.00000  |
| 110 | C7 | DYZ | 0.00000  | 0.00000  | 0.00000  | 0.00000  | 0.00000  |
| 111 | H3 | S   | -0.32588 | -0.10895 | -0.15600 | -0.48800 | 0.00372  |
| 112 | H3 | S   | -0.22466 | -0.01452 | -0.03977 | -0.28079 | -0.06119 |
| 113 | H3 | PX  | 0.25879  | 0.00043  | 0.06202  | 0.26245  | 0.01022  |
| 114 | H3 | PY  | 0.35099  | 0.17178  | 0.19649  | 0.45826  | -0.01685 |
| 115 | H3 | PZ  | 0.00000  | 0.00000  | 0.00000  | 0.00000  | 0.00000  |
| 116 | H4 | S   | -0.32844 | 0.04346  | 0.15978  | 0.49097  | 0.00057  |
| 117 | H4 | S   | -0.22956 | -0.02438 | 0.08295  | 0.27369  | 0.06636  |
| 118 | H4 | PX  | -0.29476 | -0.01747 | 0.08437  | 0.29150  | -0.00226 |
| 119 | H4 | PY  | 0.32502  | -0.08041 | -0.17635 | -0.43655 | 0.02172  |
| 120 | H4 | PZ  | 0.00000  | 0.00000  | 0.00000  | 0.00000  | 0.00000  |
| 121 | N1 | S   | 0.01284  | 0.00508  | -0.01174 | 0.00373  | 0.34116  |
| 122 | N1 | S   | -0.12080 | -0.03385 | 0.08131  | 0.11228  | -0.28589 |
| 123 | N1 | PX  | -0.02233 | -0.02570 | 0.09055  | 0.02522  | 0.20610  |
| 124 | N1 | PY  | -0.07838 | 0.04012  | -0.09382 | 0.16536  | 0.13989  |
| 125 | N1 | PZ  | 0.00000  | 0.00000  | 0.00000  | 0.00000  | 0.00000  |

|     |     |     |          |          |          |          |          |
|-----|-----|-----|----------|----------|----------|----------|----------|
| 126 | N1  | S   | -0.02228 | 0.07332  | -0.03474 | -0.03722 | -4.34292 |
| 127 | N1  | PX  | 0.07847  | -0.01978 | 0.18444  | -0.15872 | -0.94587 |
| 128 | N1  | PY  | -0.16738 | -0.03095 | -0.47980 | 0.28956  | -0.30025 |
| 129 | N1  | PZ  | 0.00000  | 0.00000  | 0.00000  | 0.00000  | 0.00000  |
| 130 | N1  | DXX | 0.09572  | -0.18571 | 0.19715  | -0.11058 | 1.02900  |
| 131 | N1  | DYY | -0.01607 | 0.21717  | -0.20243 | 0.15281  | 1.13932  |
| 132 | N1  | DZZ | 0.03688  | 0.01399  | -0.02740 | 0.01662  | 1.08366  |
| 133 | N1  | DXY | -0.11962 | 0.02731  | -0.17836 | 0.14863  | 0.00893  |
| 134 | N1  | DXZ | 0.00000  | 0.00000  | 0.00000  | 0.00000  | 0.00000  |
| 135 | N1  | DYZ | 0.00000  | 0.00000  | 0.00000  | 0.00000  | 0.00000  |
| 136 | H6  | S   | 0.60353  | 0.02922  | -0.07821 | -0.42958 | 0.08036  |
| 137 | H6  | S   | 0.40042  | 0.05113  | 0.02885  | -0.27004 | -0.03173 |
| 138 | H6  | PX  | 0.79459  | 0.00799  | -0.11685 | -0.47491 | 0.05893  |
| 139 | H6  | PY  | 0.00574  | -0.02948 | -0.00335 | 0.00943  | 0.00655  |
| 140 | H6  | PZ  | 0.00000  | 0.00000  | 0.00000  | 0.00000  | 0.00000  |
| 141 | C8  | S   | 0.01522  | -0.02050 | -0.02037 | 0.00141  | -0.06109 |
| 142 | C8  | S   | -0.08253 | 0.04808  | -0.00522 | -0.00330 | 0.50255  |
| 143 | C8  | PX  | 0.02085  | -0.08420 | 0.00377  | -0.03489 | 0.11977  |
| 144 | C8  | PY  | -0.01722 | -0.19453 | -0.10216 | 0.04772  | -0.05327 |
| 145 | C8  | PZ  | 0.00000  | 0.00000  | 0.00000  | 0.00000  | 0.00000  |
| 146 | C8  | S   | -0.14649 | 0.75765  | 0.52804  | 0.11644  | 0.80602  |
| 147 | C8  | PX  | 0.13426  | 0.37708  | 0.83956  | -0.21032 | -0.84051 |
| 148 | C8  | PY  | -0.21952 | 0.59195  | 0.47097  | 0.14438  | 0.65665  |
| 149 | C8  | PZ  | 0.00000  | 0.00000  | 0.00000  | 0.00000  | 0.00000  |
| 150 | C8  | DXX | 0.02192  | -0.42340 | -0.10368 | 0.08795  | -0.32010 |
| 151 | C8  | DYY | -0.00865 | 0.43779  | 0.08416  | -0.05339 | -0.23515 |
| 152 | C8  | DZZ | 0.07195  | -0.11627 | -0.08690 | 0.00420  | -0.28104 |
| 153 | C8  | DXY | 0.04375  | -0.25231 | 0.66129  | -0.15708 | 0.16768  |
| 154 | C8  | DXZ | 0.00000  | 0.00000  | 0.00000  | 0.00000  | 0.00000  |
| 155 | C8  | DYZ | 0.00000  | 0.00000  | 0.00000  | 0.00000  | 0.00000  |
| 156 | H8  | S   | -0.08100 | 0.70495  | 0.31812  | -0.14606 | 0.11677  |
| 157 | H8  | S   | -0.05492 | 0.24695  | -0.00644 | -0.13622 | -0.13297 |
| 158 | H8  | PX  | 0.10490  | -0.89229 | -0.36824 | 0.14730  | -0.08586 |
| 159 | H8  | PY  | -0.07810 | 0.23517  | 0.22412  | -0.08769 | 0.06053  |
| 160 | H8  | PZ  | 0.00000  | 0.00000  | 0.00000  | 0.00000  | 0.00000  |
| 161 | C10 | S   | 0.00286  | -0.02927 | -0.00087 | 0.00187  | -0.06292 |
| 162 | C10 | S   | 0.00094  | 0.02682  | -0.02708 | 0.01746  | 0.38173  |
| 163 | C10 | PX  | -0.04952 | 0.32397  | -0.67028 | 0.08039  | -0.00772 |
| 164 | C10 | PY  | 0.01891  | -0.33768 | -0.06290 | 0.04366  | 0.00063  |
| 165 | C10 | PZ  | 0.00000  | 0.00000  | 0.00000  | 0.00000  | 0.00000  |
| 166 | C10 | S   | -0.13940 | 0.49656  | 0.25883  | 0.03086  | 0.40621  |
| 167 | C10 | PX  | -0.10602 | 0.10427  | -0.64659 | 0.05060  | 0.24562  |
| 168 | C10 | PY  | -0.05041 | 0.04639  | 0.08032  | 0.02507  | 0.08804  |
| 169 | C10 | PZ  | 0.00000  | 0.00000  | 0.00000  | 0.00000  | 0.00000  |
| 170 | C10 | DXX | -0.01019 | 0.18573  | 0.23353  | -0.05444 | -0.20394 |
| 171 | C10 | DYY | 0.01466  | -0.27872 | -0.24437 | 0.06244  | -0.26946 |
| 172 | C10 | DZZ | 0.01105  | -0.12648 | 0.00439  | 0.00466  | -0.25136 |
| 173 | C10 | DXY | 0.07594  | -0.61583 | 1.13621  | -0.15819 | 0.07822  |
| 174 | C10 | DXZ | 0.00000  | 0.00000  | 0.00000  | 0.00000  | 0.00000  |
| 175 | C10 | DYZ | 0.00000  | 0.00000  | 0.00000  | 0.00000  | 0.00000  |
| 176 | H16 | S   | 0.06164  | -0.42027 | 0.60406  | -0.06233 | 0.02846  |
| 177 | H16 | S   | 0.04650  | -0.21493 | 0.31589  | -0.01303 | -0.10496 |
| 178 | H16 | PX  | -0.05301 | 0.42632  | -0.65728 | 0.07727  | -0.04912 |
| 179 | H16 | PY  | 0.03735  | -0.32898 | 0.24241  | -0.00777 | 0.00458  |

|     |     |    |          |          |          |         |          |
|-----|-----|----|----------|----------|----------|---------|----------|
| 180 | H16 | PZ | 0.00000  | 0.00000  | 0.00000  | 0.00000 | 0.00000  |
| 181 | H18 | S  | -0.03844 | 0.17016  | -0.67512 | 0.08783 | -0.00067 |
| 182 | H18 | S  | -0.05157 | 0.03839  | -0.38174 | 0.03975 | 0.04448  |
| 183 | H18 | PX | -0.04677 | 0.25429  | -0.74796 | 0.09871 | -0.00529 |
| 184 | H18 | PY | -0.00718 | -0.02941 | -0.23735 | 0.03213 | -0.02596 |
| 185 | H18 | PZ | 0.00000  | 0.00000  | 0.00000  | 0.00000 | 0.00000  |

|              |           |           |           |           |           |
|--------------|-----------|-----------|-----------|-----------|-----------|
| MO:          | 176       | 177       | 178       | 179       | 180       |
| Eigenvalues: | 4.53682   | 4.57047   | 4.59613   | 4.69338   | 4.75434   |
| (ev):        | 123.45324 | 124.36886 | 125.06718 | 127.71346 | 129.37231 |

|    |    | A   | A        | A        | A        | A        |          |
|----|----|-----|----------|----------|----------|----------|----------|
| 1  | H1 | S   | -0.09646 | 0.10324  | 0.25826  | 0.14374  | -0.03927 |
| 2  | H1 | S   | 0.10343  | -0.09816 | -0.03282 | -0.07107 | 0.16213  |
| 3  | H1 | PX  | 0.07219  | -0.08441 | -0.21510 | -0.14349 | 0.08311  |
| 4  | H1 | PY  | 0.01085  | -0.00538 | -0.04588 | -0.00727 | -0.00951 |
| 5  | H1 | PZ  | 0.00000  | 0.00000  | 0.00000  | 0.00000  | 0.00000  |
| 6  | C1 | S   | 0.14675  | -0.12126 | -0.24252 | -0.16089 | 0.02456  |
| 7  | C1 | S   | -1.06979 | 0.82845  | 1.53514  | 0.98790  | -0.23429 |
| 8  | C1 | PX  | 0.11204  | -0.06672 | -0.07989 | -0.04067 | 0.01375  |
| 9  | C1 | PY  | -0.05517 | 0.10726  | -0.08857 | -0.03914 | 0.18083  |
| 10 | C1 | PZ  | 0.00000  | 0.00000  | 0.00000  | 0.00000  | 0.00000  |
| 11 | C1 | S   | -0.19065 | 0.16009  | 0.49313  | 0.65862  | -0.16162 |
| 12 | C1 | PX  | -0.05704 | 0.11019  | -0.20112 | -0.09429 | -0.33667 |
| 13 | C1 | PY  | 0.05911  | -0.12435 | 0.22780  | -0.14008 | 0.22278  |
| 14 | C1 | PZ  | 0.00000  | 0.00000  | 0.00000  | 0.00000  | 0.00000  |
| 15 | C1 | DXX | 0.61192  | -0.54553 | -1.15482 | -0.76776 | 0.26172  |
| 16 | C1 | DYY | 0.56877  | -0.42185 | -0.84782 | -0.62844 | 0.15974  |
| 17 | C1 | DZZ | 0.56557  | -0.47306 | -0.91418 | -0.59755 | 0.05830  |
| 18 | C1 | DXY | 0.01522  | -0.09719 | 0.10904  | 0.05077  | -0.11352 |
| 19 | C1 | DXZ | 0.00000  | 0.00000  | 0.00000  | 0.00000  | 0.00000  |
| 20 | C1 | DYZ | 0.00000  | 0.00000  | 0.00000  | 0.00000  | 0.00000  |
| 21 | C2 | S   | 0.17721  | 0.11847  | 0.19925  | -0.02320 | 0.16455  |
| 22 | C2 | S   | -1.20482 | -0.68126 | -1.28310 | 0.04546  | -0.91281 |
| 23 | C2 | PX  | -0.12227 | -0.02044 | -0.06950 | -0.00392 | -0.07676 |
| 24 | C2 | PY  | -0.06186 | 0.11980  | -0.06470 | -0.12801 | 0.00367  |
| 25 | C2 | PZ  | 0.00000  | 0.00000  | 0.00000  | 0.00000  | 0.00000  |
| 26 | C2 | S   | -0.44595 | -0.50451 | -0.37224 | 0.54517  | -0.66376 |
| 27 | C2 | PX  | 0.06732  | -0.01814 | -0.22684 | 0.13763  | -0.02069 |
| 28 | C2 | PY  | 0.17629  | 0.04831  | -0.21131 | -0.10321 | 0.38648  |
| 29 | C2 | PZ  | 0.00000  | 0.00000  | 0.00000  | 0.00000  | 0.00000  |
| 30 | C2 | DXX | 0.74395  | 0.54868  | 0.90563  | -0.09054 | 0.80462  |
| 31 | C2 | DYY | 0.60840  | 0.40777  | 0.70097  | -0.08283 | 0.51304  |
| 32 | C2 | DZZ | 0.67781  | 0.44168  | 0.77076  | -0.06617 | 0.59088  |
| 33 | C2 | DXY | 0.00134  | 0.12411  | -0.00444 | -0.10993 | 0.07461  |
| 34 | C2 | DXZ | 0.00000  | 0.00000  | 0.00000  | 0.00000  | 0.00000  |
| 35 | C2 | DYZ | 0.00000  | 0.00000  | 0.00000  | 0.00000  | 0.00000  |
| 36 | C3 | S   | 0.03012  | -0.00086 | -0.20616 | 0.01662  | 0.12411  |
| 37 | C3 | S   | -0.25626 | 0.01436  | 1.33267  | -0.12099 | -0.78958 |
| 38 | C3 | PX  | 0.04068  | 0.11113  | 0.03568  | -0.03189 | -0.01608 |
| 39 | C3 | PY  | -0.15051 | -0.06493 | 0.06708  | 0.18067  | 0.01403  |
| 40 | C3 | PZ  | 0.00000  | 0.00000  | 0.00000  | 0.00000  | 0.00000  |
| 41 | C3 | S   | 0.28159  | 0.31725  | 0.02027  | -0.66372 | 0.31757  |
| 42 | C3 | PX  | -0.33093 | -0.61602 | 0.44105  | 0.03015  | 0.67873  |

|    |    |     |          |          |          |          |          |
|----|----|-----|----------|----------|----------|----------|----------|
| 43 | C3 | PY  | 0.22401  | 0.13430  | 0.24372  | -0.08322 | -0.08444 |
| 44 | C3 | PZ  | 0.00000  | 0.00000  | 0.00000  | 0.00000  | 0.00000  |
| 45 | C3 | DXX | 0.07940  | -0.08300 | -0.85898 | 0.14214  | 0.46020  |
| 46 | C3 | DYY | 0.20890  | 0.19249  | -0.81878 | -0.05530 | 0.49797  |
| 47 | C3 | DZZ | 0.10116  | -0.01716 | -0.80062 | 0.07089  | 0.46913  |
| 48 | C3 | DXY | -0.06975 | 0.00951  | 0.03365  | 0.03860  | -0.02131 |
| 49 | C3 | DXZ | 0.00000  | 0.00000  | 0.00000  | 0.00000  | 0.00000  |
| 50 | C3 | DYZ | 0.00000  | 0.00000  | 0.00000  | 0.00000  | 0.00000  |
| 51 | C4 | S   | 0.23452  | -0.20900 | -0.02781 | 0.00259  | -0.20533 |
| 52 | C4 | S   | -1.53175 | 1.30500  | 0.25072  | 0.03482  | 1.25910  |
| 53 | C4 | PX  | 0.07090  | -0.01294 | 0.14961  | 0.09268  | -0.00406 |
| 54 | C4 | PY  | 0.10789  | -0.03563 | -0.09012 | -0.07213 | 0.03570  |
| 55 | C4 | PZ  | 0.00000  | 0.00000  | 0.00000  | 0.00000  | 0.00000  |
| 56 | C4 | S   | -0.61983 | 0.60094  | -0.01096 | 0.14973  | 0.16723  |
| 57 | C4 | PX  | 0.03543  | -0.00615 | -0.17221 | -0.05696 | -0.03600 |
| 58 | C4 | PY  | 0.11244  | -0.11586 | 0.11001  | 0.00466  | 0.01713  |
| 59 | C4 | PZ  | 0.00000  | 0.00000  | 0.00000  | 0.00000  | 0.00000  |
| 60 | C4 | DXX | 0.80192  | -0.79007 | -0.22560 | -0.06386 | -0.90411 |
| 61 | C4 | DYY | 1.02454  | -0.87390 | 0.05489  | 0.11896  | -0.98016 |
| 62 | C4 | DZZ | 0.89552  | -0.80324 | -0.12758 | 0.00079  | -0.76481 |
| 63 | C4 | DXY | 0.07825  | -0.00922 | -0.00966 | -0.02583 | -0.00378 |
| 64 | C4 | DXZ | 0.00000  | 0.00000  | 0.00000  | 0.00000  | 0.00000  |
| 65 | C4 | DYZ | 0.00000  | 0.00000  | 0.00000  | 0.00000  | 0.00000  |
| 66 | C5 | S   | 0.24109  | -0.11128 | 0.18517  | 0.15616  | 0.01224  |
| 67 | C5 | S   | -1.66554 | 0.61856  | -1.11946 | -0.86677 | -0.37327 |
| 68 | C5 | PX  | -0.06445 | 0.11895  | 0.07138  | -0.01325 | 0.07757  |
| 69 | C5 | PY  | 0.11620  | 0.05202  | 0.05154  | -0.02974 | 0.12352  |
| 70 | C5 | PZ  | 0.00000  | 0.00000  | 0.00000  | 0.00000  | 0.00000  |
| 71 | C5 | S   | -0.41257 | 0.32642  | -0.43963 | -0.74807 | 0.10037  |
| 72 | C5 | PX  | 0.09537  | 0.01506  | -0.22168 | -0.17742 | 0.32364  |
| 73 | C5 | PY  | -0.07233 | -0.12947 | 0.05867  | 0.29240  | -0.43067 |
| 74 | C5 | PZ  | 0.00000  | 0.00000  | 0.00000  | 0.00000  | 0.00000  |
| 75 | C5 | DXX | 0.89924  | -0.32994 | 0.75947  | 0.62104  | 0.28193  |
| 76 | C5 | DYY | 1.06339  | -0.57035 | 0.65706  | 0.67945  | 0.06465  |
| 77 | C5 | DZZ | 0.92432  | -0.41176 | 0.72195  | 0.58116  | 0.04852  |
| 78 | C5 | DXY | -0.08777 | 0.02982  | 0.01050  | 0.01247  | -0.01484 |
| 79 | C5 | DXZ | 0.00000  | 0.00000  | 0.00000  | 0.00000  | 0.00000  |
| 80 | C5 | DYZ | 0.00000  | 0.00000  | 0.00000  | 0.00000  | 0.00000  |
| 81 | C6 | S   | 0.11157  | 0.21541  | 0.02355  | -0.13067 | 0.05387  |
| 82 | C6 | S   | -0.68331 | -1.15261 | -0.25327 | 0.73657  | -0.35716 |
| 83 | C6 | PX  | 0.02439  | 0.00886  | 0.08082  | -0.01432 | 0.04908  |
| 84 | C6 | PY  | -0.06831 | -0.07241 | -0.06460 | 0.03899  | 0.05050  |
| 85 | C6 | PZ  | 0.00000  | 0.00000  | 0.00000  | 0.00000  | 0.00000  |
| 86 | C6 | S   | 0.24850  | -0.94401 | -0.28638 | -0.09879 | 3.43723  |
| 87 | C6 | PX  | -0.51715 | -0.78531 | 0.60220  | 0.47812  | -0.45773 |
| 88 | C6 | PY  | -0.33285 | -0.15847 | 0.33571  | 0.14062  | -2.00711 |
| 89 | C6 | PZ  | 0.00000  | 0.00000  | 0.00000  | 0.00000  | 0.00000  |
| 90 | C6 | DXX | 0.36610  | 0.77994  | 0.25647  | -0.48859 | 0.13149  |
| 91 | C6 | DYY | 0.44826  | 0.86930  | 0.05532  | -0.57892 | 0.17671  |
| 92 | C6 | DZZ | 0.40256  | 0.80167  | 0.11450  | -0.47437 | 0.17117  |
| 93 | C6 | DXY | 0.05472  | 0.08959  | 0.04421  | -0.01659 | -0.06792 |
| 94 | C6 | DXZ | 0.00000  | 0.00000  | 0.00000  | 0.00000  | 0.00000  |
| 95 | C6 | DYZ | 0.00000  | 0.00000  | 0.00000  | 0.00000  | 0.00000  |
| 96 | C7 | S   | -0.09248 | -0.14115 | -0.02591 | 0.23406  | 0.12455  |

|     |    |     |          |          |          |          |          |
|-----|----|-----|----------|----------|----------|----------|----------|
| 97  | C7 | S   | 0.60747  | 0.91248  | 0.12828  | -1.49879 | -0.60281 |
| 98  | C7 | PX  | -0.03551 | -0.07649 | -0.00719 | 0.05606  | 0.08950  |
| 99  | C7 | PY  | -0.06194 | -0.07699 | 0.13806  | -0.02003 | 0.00705  |
| 100 | C7 | PZ  | 0.00000  | 0.00000  | 0.00000  | 0.00000  | 0.00000  |
| 101 | C7 | S   | 0.00615  | 0.02154  | 0.62715  | -0.43901 | -1.07655 |
| 102 | C7 | PX  | 0.30350  | 0.10049  | -0.54417 | -0.13811 | 0.87506  |
| 103 | C7 | PY  | 0.19750  | 0.50579  | -0.12662 | 0.17331  | -0.93742 |
| 104 | C7 | PZ  | 0.00000  | 0.00000  | 0.00000  | 0.00000  | 0.00000  |
| 105 | C7 | DXX | -0.39286 | -0.58446 | -0.10847 | 1.16403  | 0.40173  |
| 106 | C7 | DYY | -0.43187 | -0.62263 | 0.01122  | 0.96977  | 0.40238  |
| 107 | C7 | DZZ | -0.34714 | -0.51654 | -0.09428 | 0.87581  | 0.44407  |
| 108 | C7 | DXY | 0.09379  | 0.17392  | -0.07896 | -0.12125 | -0.10114 |
| 109 | C7 | DXZ | 0.00000  | 0.00000  | 0.00000  | 0.00000  | 0.00000  |
| 110 | C7 | DYZ | 0.00000  | 0.00000  | 0.00000  | 0.00000  | 0.00000  |
| 111 | H3 | S   | -0.20534 | 0.14297  | -0.04290 | -0.03834 | 0.19215  |
| 112 | H3 | S   | 0.09488  | -0.07922 | -0.03785 | -0.01238 | -0.05794 |
| 113 | H3 | PX  | 0.07913  | -0.06295 | 0.02816  | 0.01894  | -0.08738 |
| 114 | H3 | PY  | 0.14211  | -0.09327 | 0.05175  | 0.03363  | -0.15771 |
| 115 | H3 | PZ  | 0.00000  | 0.00000  | 0.00000  | 0.00000  | 0.00000  |
| 116 | H4 | S   | -0.19754 | 0.12483  | -0.09171 | -0.12562 | 0.03320  |
| 117 | H4 | S   | 0.17226  | -0.00821 | 0.03543  | -0.02645 | 0.23660  |
| 118 | H4 | PX  | -0.09275 | 0.05806  | -0.03282 | -0.06048 | -0.00244 |
| 119 | H4 | PY  | 0.13879  | -0.09532 | 0.04218  | 0.08182  | 0.00973  |
| 120 | H4 | PZ  | 0.00000  | 0.00000  | 0.00000  | 0.00000  | 0.00000  |
| 121 | N1 | S   | 0.09750  | -0.03737 | -0.10463 | -0.05350 | 0.42714  |
| 122 | N1 | S   | -0.10825 | -0.01838 | 0.09944  | -0.00382 | 0.03316  |
| 123 | N1 | PX  | 0.04087  | -0.00435 | -0.06340 | 0.01412  | 0.09877  |
| 124 | N1 | PY  | -0.06291 | -0.14105 | -0.01494 | 0.05080  | 0.07676  |
| 125 | N1 | PZ  | 0.00000  | 0.00000  | 0.00000  | 0.00000  | 0.00000  |
| 126 | N1 | S   | -1.34729 | 0.46832  | 1.42741  | 0.98601  | -7.45202 |
| 127 | N1 | PX  | -0.22781 | 0.32543  | 0.18176  | 0.22912  | -1.90282 |
| 128 | N1 | PY  | -0.38098 | -0.46593 | 0.34556  | 0.31769  | -0.76575 |
| 129 | N1 | PZ  | 0.00000  | 0.00000  | 0.00000  | 0.00000  | 0.00000  |
| 130 | N1 | DXX | 0.33214  | 0.01877  | -0.38181 | -0.09565 | 1.01913  |
| 131 | N1 | DYY | 0.23381  | -0.21646 | -0.31315 | -0.08047 | 1.10704  |
| 132 | N1 | DZZ | 0.31604  | -0.12033 | -0.32783 | -0.18792 | 1.37750  |
| 133 | N1 | DXY | -0.10283 | -0.16550 | 0.05146  | 0.07077  | 0.04110  |
| 134 | N1 | DXZ | 0.00000  | 0.00000  | 0.00000  | 0.00000  | 0.00000  |
| 135 | N1 | DYZ | 0.00000  | 0.00000  | 0.00000  | 0.00000  | 0.00000  |
| 136 | H6 | S   | -0.12205 | -0.11276 | -0.20411 | 0.01306  | -0.15321 |
| 137 | H6 | S   | 0.14034  | 0.06845  | -0.00081 | 0.00630  | 0.09052  |
| 138 | H6 | PX  | -0.09824 | -0.10749 | -0.15430 | 0.02680  | -0.17614 |
| 139 | H6 | PY  | 0.01388  | 0.01322  | 0.01075  | -0.00111 | -0.00377 |
| 140 | H6 | PZ  | 0.00000  | 0.00000  | 0.00000  | 0.00000  | 0.00000  |
| 141 | C8 | S   | -0.11737 | -0.23710 | 0.11829  | -0.02599 | 0.16283  |
| 142 | C8 | S   | 0.70204  | 1.46049  | -0.72003 | 0.31437  | -1.02233 |
| 143 | C8 | PX  | 0.03685  | 0.01645  | -0.01890 | -0.07688 | 0.01627  |
| 144 | C8 | PY  | -0.04748 | -0.05757 | 0.11132  | -0.19928 | -0.07200 |
| 145 | C8 | PZ  | 0.00000  | 0.00000  | 0.00000  | 0.00000  | 0.00000  |
| 146 | C8 | S   | 0.73946  | 0.54671  | -0.84897 | -0.31634 | 1.32489  |
| 147 | C8 | PX  | 0.17772  | 0.78505  | -0.22347 | 0.08524  | -1.41885 |
| 148 | C8 | PY  | 0.39701  | -0.11390 | -0.50348 | -0.39783 | 2.05031  |
| 149 | C8 | PZ  | 0.00000  | 0.00000  | 0.00000  | 0.00000  | 0.00000  |
| 150 | C8 | DXX | -0.46638 | -0.90228 | 0.49914  | -0.15656 | 0.57231  |



|     |     |     |          |          |          |          |          |
|-----|-----|-----|----------|----------|----------|----------|----------|
| 151 | C8  | DYY | -0.41684 | -0.91846 | 0.41230  | -0.06981 | 0.81696  |
| 152 | C8  | DZZ | -0.45562 | -0.89968 | 0.45993  | -0.12166 | 0.56807  |
| 153 | C8  | DXY | 0.08023  | 0.08635  | -0.05392 | -0.10460 | 0.01099  |
| 154 | C8  | DXZ | 0.00000  | 0.00000  | 0.00000  | 0.00000  | 0.00000  |
| 155 | C8  | DYZ | 0.00000  | 0.00000  | 0.00000  | 0.00000  | 0.00000  |
| 156 | H8  | S   | 0.07619  | 0.18680  | 0.02914  | -0.23466 | -0.20060 |
| 157 | H8  | S   | -0.11536 | 0.01148  | 0.12320  | 0.19759  | -0.35687 |
| 158 | H8  | PX  | -0.09251 | -0.16221 | 0.01522  | 0.22777  | 0.10780  |
| 159 | H8  | PY  | -0.01097 | -0.01186 | 0.03447  | -0.09573 | 0.01496  |
| 160 | H8  | PZ  | 0.00000  | 0.00000  | 0.00000  | 0.00000  | 0.00000  |
| 161 | C10 | S   | -0.08014 | -0.14746 | 0.15507  | -0.30794 | -0.00734 |
| 162 | C10 | S   | 0.56024  | 1.07811  | -1.02702 | 1.96607  | -0.07654 |
| 163 | C10 | PX  | -0.00128 | 0.00287  | -0.00174 | 0.01060  | -0.02292 |
| 164 | C10 | PY  | 0.06015  | 0.16225  | -0.07283 | 0.07021  | -0.15474 |
| 165 | C10 | PZ  | 0.00000  | 0.00000  | 0.00000  | 0.00000  | 0.00000  |
| 166 | C10 | S   | 0.29898  | 0.18037  | -0.58047 | 0.73985  | 1.09728  |
| 167 | C10 | PX  | -0.05004 | -0.28503 | 0.04943  | -0.00520 | 0.64915  |
| 168 | C10 | PY  | 0.02405  | -0.10034 | -0.07518 | 0.02021  | 0.33854  |
| 169 | C10 | PZ  | 0.00000  | 0.00000  | 0.00000  | 0.00000  | 0.00000  |
| 170 | C10 | DXX | -0.35381 | -0.71155 | 0.70280  | -1.47805 | 0.07542  |
| 171 | C10 | DYY | -0.32299 | -0.56167 | 0.64545  | -1.33227 | -0.17315 |
| 172 | C10 | DZZ | -0.30351 | -0.54988 | 0.58037  | -1.12627 | -0.02902 |
| 173 | C10 | DXY | 0.02089  | 0.02209  | -0.01630 | -0.03279 | 0.02512  |
| 174 | C10 | DXZ | 0.00000  | 0.00000  | 0.00000  | 0.00000  | 0.00000  |
| 175 | C10 | DYZ | 0.00000  | 0.00000  | 0.00000  | 0.00000  | 0.00000  |
| 176 | H16 | S   | 0.06503  | 0.15520  | -0.11933 | 0.23648  | -0.08920 |
| 177 | H16 | S   | -0.02420 | -0.00668 | 0.06113  | -0.16586 | -0.21073 |
| 178 | H16 | PX  | -0.04901 | -0.09081 | 0.09648  | -0.19269 | -0.00665 |
| 179 | H16 | PY  | 0.02128  | 0.04950  | -0.04986 | 0.12946  | -0.00741 |
| 180 | H16 | PZ  | 0.00000  | 0.00000  | 0.00000  | 0.00000  | 0.00000  |
| 181 | H18 | S   | 0.04497  | 0.09874  | -0.10251 | 0.26991  | 0.00896  |
| 182 | H18 | S   | -0.07461 | -0.21323 | 0.10409  | -0.15885 | 0.20361  |
| 183 | H18 | PX  | 0.03348  | 0.07378  | -0.09074 | 0.24256  | -0.00760 |
| 184 | H18 | PY  | 0.00978  | 0.03840  | -0.03536 | 0.10963  | -0.03015 |
| 185 | H18 | PZ  | 0.00000  | 0.00000  | 0.00000  | 0.00000  | 0.00000  |

|              |           |           |           |           |         |
|--------------|-----------|-----------|-----------|-----------|---------|
| MO:          | 181       | 182       | 183       | 184       | 185     |
| Eigenvalues: | 4.86203   | 4.88576   | 5.04654   | 5.28033   | 0.00000 |
| (ev):        | 132.30270 | 132.94838 | 137.32340 | 143.68525 | 0.00000 |

|    |    |    |          |          |          |          |         |
|----|----|----|----------|----------|----------|----------|---------|
|    |    | A  | A        | A        | A        | A        |         |
| 1  | H1 | S  | -0.00313 | 0.25367  | 0.06797  | -0.21258 | 0.00000 |
| 2  | H1 | S  | 0.04847  | 0.04260  | -0.11924 | 0.04590  | 0.00000 |
| 3  | H1 | PX | 0.01114  | -0.24467 | -0.09210 | 0.22936  | 0.00000 |
| 4  | H1 | PY | -0.02417 | -0.01295 | -0.00890 | -0.01060 | 0.00000 |
| 5  | H1 | PZ | 0.00000  | 0.00000  | 0.00000  | 0.00000  | 0.00000 |
| 6  | C1 | S  | 0.04057  | -0.23752 | -0.04869 | 0.17493  | 0.00000 |
| 7  | C1 | S  | -0.27385 | 1.33181  | 0.37159  | -1.07533 | 0.00000 |
| 8  | C1 | PX | 0.01476  | 0.04918  | 0.00108  | -0.06938 | 0.00000 |
| 9  | C1 | PY | -0.15118 | -0.02790 | -0.09380 | -0.03666 | 0.00000 |
| 10 | C1 | PZ | 0.00000  | 0.00000  | 0.00000  | 0.00000  | 0.00000 |
| 11 | C1 | S  | -0.37526 | 1.41893  | -0.28652 | -0.91727 | 0.00000 |
| 12 | C1 | PX | 0.00558  | -0.54508 | 0.32339  | 0.26349  | 0.00000 |
| 13 | C1 | PY | 0.29788  | 0.07785  | 0.01723  | -0.13797 | 0.00000 |

|    |    |     |          |          |          |          |         |
|----|----|-----|----------|----------|----------|----------|---------|
| 14 | C1 | PZ  | 0.00000  | 0.00000  | 0.00000  | 0.00000  | 0.00000 |
| 15 | C1 | DXX | 0.15572  | -1.18125 | -0.34653 | 1.01811  | 0.00000 |
| 16 | C1 | DYY | 0.21248  | -1.05767 | -0.26480 | 1.00925  | 0.00000 |
| 17 | C1 | DZZ | 0.15770  | -0.85104 | -0.16517 | 0.57101  | 0.00000 |
| 18 | C1 | DXY | 0.14458  | -0.00038 | 0.09100  | 0.07709  | 0.00000 |
| 19 | C1 | DXZ | 0.00000  | 0.00000  | 0.00000  | 0.00000  | 0.00000 |
| 20 | C1 | DYZ | 0.00000  | 0.00000  | 0.00000  | 0.00000  | 0.00000 |
| 21 | C2 | S   | 0.06772  | -0.23027 | 0.14392  | -0.13268 | 0.00000 |
| 22 | C2 | S   | -0.35772 | 1.38673  | -0.93128 | 0.82945  | 0.00000 |
| 23 | C2 | PX  | -0.00872 | -0.05196 | 0.01059  | -0.05380 | 0.00000 |
| 24 | C2 | PY  | 0.16324  | 0.02600  | 0.08611  | -0.01730 | 0.00000 |
| 25 | C2 | PZ  | 0.00000  | 0.00000  | 0.00000  | 0.00000  | 0.00000 |
| 26 | C2 | S   | -0.16015 | 1.53411  | -0.44593 | 0.71019  | 0.00000 |
| 27 | C2 | PX  | 0.05007  | 0.70403  | 0.16539  | 0.36744  | 0.00000 |
| 28 | C2 | PY  | -0.01483 | 0.32703  | 0.05195  | 0.41553  | 0.00000 |
| 29 | C2 | PZ  | 0.00000  | 0.00000  | 0.00000  | 0.00000  | 0.00000 |
| 30 | C2 | DXX | 0.40911  | -1.12560 | 0.87688  | -0.75043 | 0.00000 |
| 31 | C2 | DYY | 0.26025  | -1.12767 | 0.72188  | -0.78444 | 0.00000 |
| 32 | C2 | DZZ | 0.22318  | -0.83381 | 0.48424  | -0.43466 | 0.00000 |
| 33 | C2 | DXY | 0.15873  | 0.05973  | 0.05644  | 0.00520  | 0.00000 |
| 34 | C2 | DXZ | 0.00000  | 0.00000  | 0.00000  | 0.00000  | 0.00000 |
| 35 | C2 | DYZ | 0.00000  | 0.00000  | 0.00000  | 0.00000  | 0.00000 |
| 36 | C3 | S   | -0.20263 | 0.09926  | -0.03300 | -0.24852 | 0.00000 |
| 37 | C3 | S   | 1.19534  | -0.69620 | 0.06703  | 1.34366  | 0.00000 |
| 38 | C3 | PX  | 0.03086  | 0.10038  | -0.02462 | -0.00731 | 0.00000 |
| 39 | C3 | PY  | 0.04209  | 0.03028  | 0.11750  | 0.11288  | 0.00000 |
| 40 | C3 | PZ  | 0.00000  | 0.00000  | 0.00000  | 0.00000  | 0.00000 |
| 41 | C3 | S   | 1.41304  | 0.50046  | 0.89614  | 3.53678  | 0.00000 |
| 42 | C3 | PX  | 0.02412  | -0.17882 | -0.36204 | -0.86575 | 0.00000 |
| 43 | C3 | PY  | 0.39903  | -0.22782 | 0.50537  | -0.98022 | 0.00000 |
| 44 | C3 | PZ  | 0.00000  | 0.00000  | 0.00000  | 0.00000  | 0.00000 |
| 45 | C3 | DXX | -0.90452 | 0.29572  | -0.03939 | -1.04713 | 0.00000 |
| 46 | C3 | DYY | -0.97493 | 0.67450  | -0.26120 | -1.43542 | 0.00000 |
| 47 | C3 | DZZ | -0.74281 | 0.36468  | -0.10141 | -0.83969 | 0.00000 |
| 48 | C3 | DXY | -0.05959 | 0.02773  | -0.01143 | -0.11698 | 0.00000 |
| 49 | C3 | DXZ | 0.00000  | 0.00000  | 0.00000  | 0.00000  | 0.00000 |
| 50 | C3 | DYZ | 0.00000  | 0.00000  | 0.00000  | 0.00000  | 0.00000 |
| 51 | C4 | S   | 0.15826  | 0.13547  | 0.12173  | -0.13827 | 0.00000 |
| 52 | C4 | S   | -0.98363 | -0.77670 | -0.82036 | 0.86294  | 0.00000 |
| 53 | C4 | PX  | -0.02621 | 0.12689  | 0.01880  | -0.05605 | 0.00000 |
| 54 | C4 | PY  | 0.02358  | -0.05919 | -0.01897 | 0.05410  | 0.00000 |
| 55 | C4 | PZ  | 0.00000  | 0.00000  | 0.00000  | 0.00000  | 0.00000 |
| 56 | C4 | S   | -1.00805 | -1.16812 | -0.34896 | 1.04117  | 0.00000 |
| 57 | C4 | PX  | 0.12690  | 0.06877  | 0.08030  | -0.05654 | 0.00000 |
| 58 | C4 | PY  | 0.20703  | 0.35696  | -0.08654 | -0.31856 | 0.00000 |
| 59 | C4 | PZ  | 0.00000  | 0.00000  | 0.00000  | 0.00000  | 0.00000 |
| 60 | C4 | DXX | 0.77445  | 0.56486  | 0.66701  | -0.77045 | 0.00000 |
| 61 | C4 | DYY | 0.74126  | 0.78377  | 0.68658  | -0.81867 | 0.00000 |
| 62 | C4 | DZZ | 0.56990  | 0.46371  | 0.42153  | -0.44981 | 0.00000 |
| 63 | C4 | DXY | 0.03222  | -0.03327 | 0.01845  | 0.00580  | 0.00000 |
| 64 | C4 | DXZ | 0.00000  | 0.00000  | 0.00000  | 0.00000  | 0.00000 |
| 65 | C4 | DYZ | 0.00000  | 0.00000  | 0.00000  | 0.00000  | 0.00000 |
| 66 | C5 | S   | -0.22184 | 0.03586  | -0.16331 | 0.12009  | 0.00000 |
| 67 | C5 | S   | 1.30153  | -0.28080 | 1.01789  | -0.77289 | 0.00000 |

|     |    |     |          |          |          |          |         |
|-----|----|-----|----------|----------|----------|----------|---------|
| 68  | C5 | PX  | 0.01932  | -0.12750 | 0.05468  | -0.04095 | 0.00000 |
| 69  | C5 | PY  | 0.03215  | -0.05939 | 0.05374  | -0.04185 | 0.00000 |
| 70  | C5 | PZ  | 0.00000  | 0.00000  | 0.00000  | 0.00000  | 0.00000 |
| 71  | C5 | S   | 1.10151  | -0.50032 | 0.66645  | -1.14590 | 0.00000 |
| 72  | C5 | PX  | 0.27718  | 0.31229  | 0.09328  | 0.02565  | 0.00000 |
| 73  | C5 | PY  | -0.33332 | 0.09208  | -0.08073 | 0.27012  | 0.00000 |
| 74  | C5 | PZ  | 0.00000  | 0.00000  | 0.00000  | 0.00000  | 0.00000 |
| 75  | C5 | DXX | -1.00610 | 0.15372  | -0.82428 | 0.69928  | 0.00000 |
| 76  | C5 | DYY | -1.07997 | 0.37082  | -0.92607 | 0.71734  | 0.00000 |
| 77  | C5 | DZZ | -0.79822 | 0.10266  | -0.56097 | 0.38810  | 0.00000 |
| 78  | C5 | DXY | 0.02374  | 0.03582  | 0.01653  | 0.00411  | 0.00000 |
| 79  | C5 | DXZ | 0.00000  | 0.00000  | 0.00000  | 0.00000  | 0.00000 |
| 80  | C5 | DYZ | 0.00000  | 0.00000  | 0.00000  | 0.00000  | 0.00000 |
| 81  | C6 | S   | 0.17013  | 0.26217  | -0.03969 | 0.17596  | 0.00000 |
| 82  | C6 | S   | -1.03366 | -1.48003 | 0.40761  | -0.96418 | 0.00000 |
| 83  | C6 | PX  | 0.05146  | -0.04931 | 0.07236  | 0.02296  | 0.00000 |
| 84  | C6 | PY  | -0.05442 | 0.01955  | 0.04275  | -0.04008 | 0.00000 |
| 85  | C6 | PZ  | 0.00000  | 0.00000  | 0.00000  | 0.00000  | 0.00000 |
| 86  | C6 | S   | -0.07785 | 0.24556  | 0.38298  | -1.73173 | 0.00000 |
| 87  | C6 | PX  | -0.28095 | -0.82911 | -0.60168 | -1.23639 | 0.00000 |
| 88  | C6 | PY  | -0.96370 | -1.61530 | -0.82374 | 0.14888  | 0.00000 |
| 89  | C6 | PZ  | 0.00000  | 0.00000  | 0.00000  | 0.00000  | 0.00000 |
| 90  | C6 | DXX | 0.83159  | 0.99258  | -0.24438 | 0.83462  | 0.00000 |
| 91  | C6 | DYY | 0.75634  | 1.31575  | -0.40814 | 0.90714  | 0.00000 |
| 92  | C6 | DZZ | 0.61082  | 0.91663  | -0.14713 | 0.59339  | 0.00000 |
| 93  | C6 | DXY | -0.00568 | -0.08317 | -0.02080 | -0.06601 | 0.00000 |
| 94  | C6 | DXZ | 0.00000  | 0.00000  | 0.00000  | 0.00000  | 0.00000 |
| 95  | C6 | DYZ | 0.00000  | 0.00000  | 0.00000  | 0.00000  | 0.00000 |
| 96  | C7 | S   | 0.05846  | 0.04544  | 0.22163  | 0.19461  | 0.00000 |
| 97  | C7 | S   | -0.24707 | -0.17701 | -1.37586 | -0.89381 | 0.00000 |
| 98  | C7 | PX  | 0.03850  | 0.03332  | -0.00837 | -0.03366 | 0.00000 |
| 99  | C7 | PY  | 0.16866  | -0.07107 | -0.01960 | 0.13767  | 0.00000 |
| 100 | C7 | PZ  | 0.00000  | 0.00000  | 0.00000  | 0.00000  | 0.00000 |
| 101 | C7 | S   | -0.15862 | -1.00633 | -1.01258 | -3.04260 | 0.00000 |
| 102 | C7 | PX  | 0.13555  | 0.79838  | 0.42604  | 1.30880  | 0.00000 |
| 103 | C7 | PY  | -0.26203 | -0.38683 | 0.10776  | -0.38530 | 0.00000 |
| 104 | C7 | PZ  | 0.00000  | 0.00000  | 0.00000  | 0.00000  | 0.00000 |
| 105 | C7 | DXX | 0.21180  | 0.10673  | 1.29698  | 1.04895  | 0.00000 |
| 106 | C7 | DYY | 0.31180  | 0.06151  | 0.97812  | 0.90205  | 0.00000 |
| 107 | C7 | DZZ | 0.19487  | 0.17645  | 0.77058  | 0.61991  | 0.00000 |
| 108 | C7 | DXY | -0.21544 | 0.07098  | -0.06610 | -0.23490 | 0.00000 |
| 109 | C7 | DXZ | 0.00000  | 0.00000  | 0.00000  | 0.00000  | 0.00000 |
| 110 | C7 | DYZ | 0.00000  | 0.00000  | 0.00000  | 0.00000  | 0.00000 |
| 111 | H3 | S   | -0.13743 | -0.15941 | -0.13881 | 0.17994  | 0.00000 |
| 112 | H3 | S   | 0.03333  | -0.00770 | 0.07809  | 0.00335  | 0.00000 |
| 113 | H3 | PX  | 0.06801  | 0.07946  | 0.06219  | -0.07709 | 0.00000 |
| 114 | H3 | PY  | 0.12818  | 0.15029  | 0.14419  | -0.18022 | 0.00000 |
| 115 | H3 | PZ  | 0.00000  | 0.00000  | 0.00000  | 0.00000  | 0.00000 |
| 116 | H4 | S   | 0.22772  | -0.05769 | 0.19583  | -0.13888 | 0.00000 |
| 117 | H4 | S   | 0.02822  | 0.08872  | -0.03784 | 0.04240  | 0.00000 |
| 118 | H4 | PX  | 0.11558  | -0.05562 | 0.10976  | -0.08166 | 0.00000 |
| 119 | H4 | PY  | -0.18582 | 0.07004  | -0.18590 | 0.14738  | 0.00000 |
| 120 | H4 | PZ  | 0.00000  | 0.00000  | 0.00000  | 0.00000  | 0.00000 |
| 121 | N1 | S   | 0.04920  | 0.19371  | 0.11360  | -0.00700 | 0.00000 |

|     |     |     |          |          |          |          |         |
|-----|-----|-----|----------|----------|----------|----------|---------|
| 122 | N1  | S   | 0.20026  | 0.09766  | -0.13615 | -0.00499 | 0.00000 |
| 123 | N1  | PX  | -0.09423 | -0.02345 | 0.13465  | -0.04264 | 0.00000 |
| 124 | N1  | PY  | -0.04509 | -0.10365 | 0.05577  | -0.07893 | 0.00000 |
| 125 | N1  | PZ  | 0.00000  | 0.00000  | 0.00000  | 0.00000  | 0.00000 |
| 126 | N1  | S   | -1.64116 | -4.00911 | -1.74496 | -0.01352 | 0.00000 |
| 127 | N1  | PX  | -0.52122 | -0.99044 | -0.14603 | 0.09288  | 0.00000 |
| 128 | N1  | PY  | -0.23040 | -0.76611 | -0.41672 | -0.37291 | 0.00000 |
| 129 | N1  | PZ  | 0.00000  | 0.00000  | 0.00000  | 0.00000  | 0.00000 |
| 130 | N1  | DXX | -0.08313 | 0.40982  | 0.53266  | -0.00762 | 0.00000 |
| 131 | N1  | DYY | -0.09393 | 0.31997  | 0.47186  | -0.13917 | 0.00000 |
| 132 | N1  | DZZ | 0.21708  | 0.65931  | 0.27643  | 0.00453  | 0.00000 |
| 133 | N1  | DXY | 0.05586  | -0.11671 | -0.06808 | -0.10717 | 0.00000 |
| 134 | N1  | DXZ | 0.00000  | 0.00000  | 0.00000  | 0.00000  | 0.00000 |
| 135 | N1  | DYZ | 0.00000  | 0.00000  | 0.00000  | 0.00000  | 0.00000 |
| 136 | H6  | S   | -0.09881 | 0.24340  | -0.18538 | 0.17624  | 0.00000 |
| 137 | H6  | S   | 0.03868  | 0.07839  | 0.14597  | 0.03417  | 0.00000 |
| 138 | H6  | PX  | -0.12112 | 0.20935  | -0.21430 | 0.16453  | 0.00000 |
| 139 | H6  | PY  | -0.00432 | 0.00562  | -0.00388 | -0.00126 | 0.00000 |
| 140 | H6  | PZ  | 0.00000  | 0.00000  | 0.00000  | 0.00000  | 0.00000 |
| 141 | C8  | S   | 0.20104  | -0.00143 | -0.23473 | -0.11992 | 0.00000 |
| 142 | C8  | S   | -1.20376 | -0.07961 | 1.48166  | 0.61555  | 0.00000 |
| 143 | C8  | PX  | -0.05542 | -0.00884 | -0.00156 | -0.02494 | 0.00000 |
| 144 | C8  | PY  | -0.12113 | 0.01588  | 0.08119  | 0.01526  | 0.00000 |
| 145 | C8  | PZ  | 0.00000  | 0.00000  | 0.00000  | 0.00000  | 0.00000 |
| 146 | C8  | S   | -0.53717 | 1.22147  | 1.57225  | 1.34958  | 0.00000 |
| 147 | C8  | PX  | -0.42589 | -0.36816 | 0.19320  | 0.81979  | 0.00000 |
| 148 | C8  | PY  | 0.50031  | 1.33811  | 0.25965  | 0.88479  | 0.00000 |
| 149 | C8  | PZ  | 0.00000  | 0.00000  | 0.00000  | 0.00000  | 0.00000 |
| 150 | C8  | DXX | 0.87956  | -0.02404 | -1.13088 | -0.48419 | 0.00000 |
| 151 | C8  | DYY | 1.05073  | 0.04558  | -1.35618 | -0.66673 | 0.00000 |
| 152 | C8  | DZZ | 0.71376  | -0.00932 | -0.82714 | -0.39590 | 0.00000 |
| 153 | C8  | DXY | -0.05602 | -0.00966 | -0.07904 | -0.09133 | 0.00000 |
| 154 | C8  | DXZ | 0.00000  | 0.00000  | 0.00000  | 0.00000  | 0.00000 |
| 155 | C8  | DYZ | 0.00000  | 0.00000  | 0.00000  | 0.00000  | 0.00000 |
| 156 | H8  | S   | -0.11675 | -0.05438 | -0.30948 | -0.30118 | 0.00000 |
| 157 | H8  | S   | -0.06051 | -0.25349 | 0.01688  | -0.22109 | 0.00000 |
| 158 | H8  | PX  | 0.10451  | -0.01136 | 0.26973  | 0.26994  | 0.00000 |
| 159 | H8  | PY  | -0.00246 | -0.00033 | -0.12496 | -0.09187 | 0.00000 |
| 160 | H8  | PZ  | 0.00000  | 0.00000  | 0.00000  | 0.00000  | 0.00000 |
| 161 | C10 | S   | -0.17714 | 0.06308  | 0.15128  | 0.05280  | 0.00000 |
| 162 | C10 | S   | 1.04887  | -0.40904 | -0.87231 | -0.25962 | 0.00000 |
| 163 | C10 | PX  | -0.01469 | -0.01284 | 0.01351  | 0.01602  | 0.00000 |
| 164 | C10 | PY  | -0.11327 | -0.02687 | 0.17490  | 0.12488  | 0.00000 |
| 165 | C10 | PZ  | 0.00000  | 0.00000  | 0.00000  | 0.00000  | 0.00000 |
| 166 | C10 | S   | 1.02964  | 0.41767  | -0.68464 | 0.13520  | 0.00000 |
| 167 | C10 | PX  | 0.23955  | 0.25656  | -0.01149 | -0.25174 | 0.00000 |
| 168 | C10 | PY  | 0.18239  | 0.14806  | -0.09156 | 0.09552  | 0.00000 |
| 169 | C10 | PZ  | 0.00000  | 0.00000  | 0.00000  | 0.00000  | 0.00000 |
| 170 | C10 | DXX | -0.86353 | 0.35620  | 0.77480  | 0.25097  | 0.00000 |
| 171 | C10 | DYY | -0.95991 | 0.25482  | 0.93492  | 0.37078  | 0.00000 |
| 172 | C10 | DZZ | -0.60740 | 0.21925  | 0.47818  | 0.15830  | 0.00000 |
| 173 | C10 | DXY | -0.00864 | -0.00258 | -0.04170 | -0.05519 | 0.00000 |
| 174 | C10 | DXZ | 0.00000  | 0.00000  | 0.00000  | 0.00000  | 0.00000 |
| 175 | C10 | DYZ | 0.00000  | 0.00000  | 0.00000  | 0.00000  | 0.00000 |

|     |     |    |          |          |          |          |         |
|-----|-----|----|----------|----------|----------|----------|---------|
| 176 | H16 | S  | 0.12646  | -0.10467 | -0.17749 | -0.05409 | 0.00000 |
| 177 | H16 | S  | -0.18393 | -0.06110 | 0.09690  | 0.10788  | 0.00000 |
| 178 | H16 | PX | -0.14189 | 0.05672  | 0.16302  | 0.07216  | 0.00000 |
| 179 | H16 | PY | 0.10084  | -0.04215 | -0.10881 | -0.04117 | 0.00000 |
| 180 | H16 | PZ | 0.00000  | 0.00000  | 0.00000  | 0.00000  | 0.00000 |
| 181 | H18 | S  | 0.18276  | -0.04689 | -0.13611 | -0.05442 | 0.00000 |
| 182 | H18 | S  | -0.03400 | 0.09450  | 0.09712  | -0.06220 | 0.00000 |
| 183 | H18 | PX | 0.15962  | -0.06151 | -0.13698 | -0.04004 | 0.00000 |
| 184 | H18 | PY | 0.07652  | -0.04122 | -0.08140 | -0.01938 | 0.00000 |
| 185 | H18 | PZ | 0.00000  | 0.00000  | 0.00000  | 0.00000  | 0.00000 |

#### Mulliken Population Analysis

| AO | atom type |      | Occupancy |
|----|-----------|------|-----------|
| -- | ----      | ---- | -----     |
| 1  | H1        | S    | 0.534227  |
| 2  | H1        | S    | 0.293930  |
| 3  | H1        | PX   | 0.010027  |
| 4  | H1        | PY   | 0.001556  |
| 5  | H1        | PZ   | 0.002424  |
| 6  | C1        | S    | 1.996538  |
| 7  | C1        | S    | 0.673068  |
| 8  | C1        | PX   | 0.731242  |
| 9  | C1        | PY   | 0.741701  |
| 10 | C1        | PZ   | 0.520173  |
| 11 | C1        | S    | 0.451915  |
| 12 | C1        | PX   | 0.308437  |
| 13 | C1        | PY   | 0.165618  |
| 14 | C1        | PZ   | 0.451393  |
| 15 | C1        | DXX  | 0.018907  |
| 16 | C1        | DYY  | 0.020693  |
| 17 | C1        | DZZ  | -0.018414 |
| 18 | C1        | DXY  | 0.013999  |
| 19 | C1        | DXZ  | 0.003430  |
| 20 | C1        | DYZ  | 0.008192  |
| 21 | C2        | S    | 1.996536  |
| 22 | C2        | S    | 0.672240  |
| 23 | C2        | PX   | 0.730798  |
| 24 | C2        | PY   | 0.744021  |
| 25 | C2        | PZ   | 0.532194  |
| 26 | C2        | S    | 0.467023  |
| 27 | C2        | PX   | 0.306340  |
| 28 | C2        | PY   | 0.159501  |
| 29 | C2        | PZ   | 0.465732  |
| 30 | C2        | DXX  | 0.018030  |
| 31 | C2        | DYY  | 0.020448  |
| 32 | C2        | DZZ  | -0.017929 |
| 33 | C2        | DXY  | 0.014807  |
| 34 | C2        | DXZ  | 0.003257  |
| 35 | C2        | DYZ  | 0.006821  |
| 36 | C3        | S    | 1.996655  |
| 37 | C3        | S    | 0.671935  |
| 38 | C3        | PX   | 0.714603  |

|    |    |     |           |
|----|----|-----|-----------|
| 39 | C3 | PY  | 0.760397  |
| 40 | C3 | PZ  | 0.544646  |
| 41 | C3 | S   | 0.440812  |
| 42 | C3 | PX  | 0.210980  |
| 43 | C3 | PY  | 0.233561  |
| 44 | C3 | PZ  | 0.466911  |
| 45 | C3 | DXX | 0.019466  |
| 46 | C3 | DYY | 0.030938  |
| 47 | C3 | DZZ | -0.017152 |
| 48 | C3 | DXY | 0.013298  |
| 49 | C3 | DXZ | 0.003656  |
| 50 | C3 | DYZ | 0.010067  |
| 51 | C4 | S   | 1.996540  |
| 52 | C4 | S   | 0.669391  |
| 53 | C4 | PX  | 0.718668  |
| 54 | C4 | PY  | 0.746079  |
| 55 | C4 | PZ  | 0.524657  |
| 56 | C4 | S   | 0.489691  |
| 57 | C4 | PX  | 0.199828  |
| 58 | C4 | PY  | 0.294507  |
| 59 | C4 | PZ  | 0.474817  |
| 60 | C4 | DXX | 0.020150  |
| 61 | C4 | DYY | 0.019471  |
| 62 | C4 | DZZ | -0.018519 |
| 63 | C4 | DXY | 0.014098  |
| 64 | C4 | DXZ | 0.005439  |
| 65 | C4 | DYZ | 0.005240  |
| 66 | C5 | S   | 1.996582  |
| 67 | C5 | S   | 0.674128  |
| 68 | C5 | PX  | 0.722416  |
| 69 | C5 | PY  | 0.754860  |
| 70 | C5 | PZ  | 0.499870  |
| 71 | C5 | S   | 0.499096  |
| 72 | C5 | PX  | 0.212127  |
| 73 | C5 | PY  | 0.293392  |
| 74 | C5 | PZ  | 0.453126  |
| 75 | C5 | DXX | 0.019682  |
| 76 | C5 | DYY | 0.019518  |
| 77 | C5 | DZZ | -0.018988 |
| 78 | C5 | DXY | 0.014776  |
| 79 | C5 | DXZ | 0.005484  |
| 80 | C5 | DYZ | 0.005965  |
| 81 | C6 | S   | 1.996741  |
| 82 | C6 | S   | 0.693344  |
| 83 | C6 | PX  | 0.723360  |
| 84 | C6 | PY  | 0.756907  |
| 85 | C6 | PZ  | 0.480469  |
| 86 | C6 | S   | 0.345409  |
| 87 | C6 | PX  | 0.184739  |
| 88 | C6 | PY  | 0.130464  |
| 89 | C6 | PZ  | 0.365449  |
| 90 | C6 | DXX | 0.021562  |
| 91 | C6 | DYY | 0.034517  |
| 92 | C6 | DZZ | -0.020076 |

|     |    |     |           |
|-----|----|-----|-----------|
| 93  | C6 | DXY | 0.024653  |
| 94  | C6 | DXZ | 0.006464  |
| 95  | C6 | DYZ | 0.015544  |
| 96  | C7 | S   | 1.996678  |
| 97  | C7 | S   | 0.676646  |
| 98  | C7 | PX  | 0.724481  |
| 99  | C7 | PY  | 0.751110  |
| 100 | C7 | PZ  | 0.511160  |
| 101 | C7 | S   | 0.445210  |
| 102 | C7 | PX  | 0.309117  |
| 103 | C7 | PY  | 0.200439  |
| 104 | C7 | PZ  | 0.458662  |
| 105 | C7 | DXX | 0.021581  |
| 106 | C7 | DYY | 0.016439  |
| 107 | C7 | DZZ | -0.017967 |
| 108 | C7 | DXY | 0.016389  |
| 109 | C7 | DXZ | 0.002856  |
| 110 | C7 | DYZ | 0.008651  |
| 111 | H3 | S   | 0.535714  |
| 112 | H3 | S   | 0.297733  |
| 113 | H3 | PX  | 0.003041  |
| 114 | H3 | PY  | 0.008358  |
| 115 | H3 | PZ  | 0.002458  |
| 116 | H4 | S   | 0.536095  |
| 117 | H4 | S   | 0.294211  |
| 118 | H4 | PX  | 0.003646  |
| 119 | H4 | PY  | 0.007816  |
| 120 | H4 | PZ  | 0.002259  |
| 121 | N1 | S   | 1.996235  |
| 122 | N1 | S   | 0.785459  |
| 123 | N1 | PX  | 0.913388  |
| 124 | N1 | PY  | 0.778246  |
| 125 | N1 | PZ  | 0.672021  |
| 126 | N1 | S   | 0.964114  |
| 127 | N1 | PX  | 0.571462  |
| 128 | N1 | PY  | 0.314826  |
| 129 | N1 | PZ  | 0.552948  |
| 130 | N1 | DXX | -0.000187 |
| 131 | N1 | DYY | 0.013831  |
| 132 | N1 | DZZ | -0.011239 |
| 133 | N1 | DXY | 0.017646  |
| 134 | N1 | DXZ | 0.006469  |
| 135 | N1 | DYZ | 0.009289  |
| 136 | H6 | S   | 0.531044  |
| 137 | H6 | S   | 0.282647  |
| 138 | H6 | PX  | 0.010177  |
| 139 | H6 | PY  | 0.001499  |
| 140 | H6 | PZ  | 0.002415  |
| 141 | C8 | S   | 1.996653  |
| 142 | C8 | S   | 0.680637  |
| 143 | C8 | PX  | 0.667464  |
| 144 | C8 | PY  | 0.769201  |
| 145 | C8 | PZ  | 0.537599  |
| 146 | C8 | S   | 0.375689  |

|     |     |     |           |
|-----|-----|-----|-----------|
| 147 | C8  | PX  | 0.126334  |
| 148 | C8  | PY  | 0.093261  |
| 149 | C8  | PZ  | 0.429449  |
| 150 | C8  | DXX | 0.019140  |
| 151 | C8  | DYY | 0.030685  |
| 152 | C8  | DZZ | -0.019127 |
| 153 | C8  | DXY | 0.025934  |
| 154 | C8  | DXZ | 0.009133  |
| 155 | C8  | DYZ | 0.010716  |
| 156 | H8  | S   | 0.530976  |
| 157 | H8  | S   | 0.287277  |
| 158 | H8  | PX  | 0.009214  |
| 159 | H8  | PY  | 0.002740  |
| 160 | H8  | PZ  | 0.002486  |
| 161 | C10 | S   | 1.996645  |
| 162 | C10 | S   | 0.679880  |
| 163 | C10 | PX  | 0.726621  |
| 164 | C10 | PY  | 0.770854  |
| 165 | C10 | PZ  | 0.463199  |
| 166 | C10 | S   | 0.565019  |
| 167 | C10 | PX  | 0.369295  |
| 168 | C10 | PY  | 0.236050  |
| 169 | C10 | PZ  | 0.444426  |
| 170 | C10 | DXX | 0.011825  |
| 171 | C10 | DYY | 0.018859  |
| 172 | C10 | DZZ | -0.020377 |
| 173 | C10 | DXY | 0.013621  |
| 174 | C10 | DXZ | 0.000145  |
| 175 | C10 | DYZ | 0.007897  |
| 176 | H16 | S   | 0.533171  |
| 177 | H16 | S   | 0.306004  |
| 178 | H16 | PX  | 0.007270  |
| 179 | H16 | PY  | 0.004369  |
| 180 | H16 | PZ  | 0.002240  |
| 181 | H18 | S   | 0.529085  |
| 182 | H18 | S   | 0.288122  |
| 183 | H18 | PX  | 0.008764  |
| 184 | H18 | PY  | 0.003094  |
| 185 | H18 | PZ  | 0.002105  |

| Atom  | Occupancy | Charge    |
|-------|-----------|-----------|
| ----- | -----     | -----     |
| H1    | 0.842164  | 0.157836  |
| C1    | 6.086893  | -0.086893 |
| C2    | 6.119819  | -0.119819 |
| C3    | 6.100773  | -0.100773 |
| C4    | 6.160057  | -0.160057 |
| C5    | 6.152032  | -0.152032 |
| C6    | 5.759546  | 0.240454  |
| C7    | 6.121452  | -0.121452 |
| H3    | 0.847304  | 0.152696  |
| H4    | 0.844027  | 0.155973  |
| N1    | 7.584508  | -0.584508 |



|     |          |           |
|-----|----------|-----------|
| H6  | 0.827782 | 0.172218  |
| C8  | 5.752768 | 0.247232  |
| H8  | 0.832693 | 0.167307  |
| C10 | 6.283960 | -0.283960 |
| H16 | 0.853054 | 0.146946  |
| H18 | 0.831169 | 0.168831  |

Total Charge = 0.000000

#### Natural Atomic Orbital Populations

| Nao | Atom  | Type    | Basis | Occupancy |
|-----|-------|---------|-------|-----------|
| --- | ----- | -----   | ----- | -----     |
| 1   | H1    | S       | MIN   | 0.762232  |
| 2   | H1    | S       | RYD   | 0.000660  |
| 3   | H1    | PX      | RYD   | 0.000584  |
| 4   | H1    | PY      | RYD   | 0.000022  |
| 5   | H1    | PZ      | RYD   | 0.000084  |
| 6   | C1    | S       | MIN   | 1.999001  |
| 7   | C1    | S       | MIN   | 0.946432  |
| 8   | C1    | S       | RYD   | 0.000872  |
| 9   | C1    | S       | RYD   | 0.000017  |
| 10  | C1    | PX      | MIN   | 1.202635  |
| 11  | C1    | PX      | RYD   | 0.005762  |
| 12  | C1    | PY      | MIN   | 1.048784  |
| 13  | C1    | PY      | RYD   | 0.006172  |
| 14  | C1    | PZ      | MIN   | 0.978641  |
| 15  | C1    | PZ      | RYD   | 0.001737  |
| 16  | C1    | DXY     | RYD   | 0.001645  |
| 17  | C1    | DXZ     | RYD   | 0.000736  |
| 18  | C1    | DYZ     | RYD   | 0.000962  |
| 19  | C1    | DXX-YY  | RYD   | 0.001647  |
| 20  | C1    | D3ZZ-RR | RYD   | 0.001200  |
| 21  | C2    | S       | MIN   | 1.998979  |
| 22  | C2    | S       | MIN   | 0.958145  |
| 23  | C2    | S       | RYD   | 0.001101  |
| 24  | C2    | S       | RYD   | 0.000030  |
| 25  | C2    | PX      | MIN   | 1.208579  |
| 26  | C2    | PX      | RYD   | 0.005767  |
| 27  | C2    | PY      | MIN   | 1.052169  |
| 28  | C2    | PY      | RYD   | 0.007106  |
| 29  | C2    | PZ      | MIN   | 1.005452  |
| 30  | C2    | PZ      | RYD   | 0.001993  |
| 31  | C2    | DXY     | RYD   | 0.001815  |
| 32  | C2    | DXZ     | RYD   | 0.000747  |
| 33  | C2    | DYZ     | RYD   | 0.000851  |
| 34  | C2    | DXX-YY  | RYD   | 0.001530  |
| 35  | C2    | D3ZZ-RR | RYD   | 0.001217  |
| 36  | C3    | S       | MIN   | 1.998972  |
| 37  | C3    | S       | MIN   | 0.885307  |
| 38  | C3    | S       | RYD   | 0.001378  |
| 39  | C3    | S       | RYD   | 0.000049  |

|    |    |         |     |          |
|----|----|---------|-----|----------|
| 40 | C3 | PX      | MIN | 1.074367 |
| 41 | C3 | PX      | RYD | 0.008200 |
| 42 | C3 | PY      | MIN | 1.115619 |
| 43 | C3 | PY      | RYD | 0.004436 |
| 44 | C3 | PZ      | MIN | 1.037130 |
| 45 | C3 | PZ      | RYD | 0.001083 |
| 46 | C3 | DXY     | RYD | 0.001228 |
| 47 | C3 | DXZ     | RYD | 0.000292 |
| 48 | C3 | DYZ     | RYD | 0.001438 |
| 49 | C3 | DXX-YY  | RYD | 0.001830 |
| 50 | C3 | D3ZZ-RR | RYD | 0.001064 |
| 51 | C4 | S       | MIN | 1.999075 |
| 52 | C4 | S       | MIN | 0.958946 |
| 53 | C4 | S       | RYD | 0.000696 |
| 54 | C4 | S       | RYD | 0.000025 |
| 55 | C4 | PX      | MIN | 1.067538 |
| 56 | C4 | PX      | RYD | 0.005994 |
| 57 | C4 | PY      | MIN | 1.183150 |
| 58 | C4 | PY      | RYD | 0.006385 |
| 59 | C4 | PZ      | MIN | 1.008590 |
| 60 | C4 | PZ      | RYD | 0.001893 |
| 61 | C4 | DXY     | RYD | 0.001657 |
| 62 | C4 | DXZ     | RYD | 0.000548 |
| 63 | C4 | DYZ     | RYD | 0.001053 |
| 64 | C4 | DXX-YY  | RYD | 0.001705 |
| 65 | C4 | D3ZZ-RR | RYD | 0.001256 |
| 66 | C5 | S       | MIN | 1.999086 |
| 67 | C5 | S       | MIN | 0.962389 |
| 68 | C5 | S       | RYD | 0.000636 |
| 69 | C5 | S       | RYD | 0.000028 |
| 70 | C5 | PX      | MIN | 1.077615 |
| 71 | C5 | PX      | RYD | 0.005832 |
| 72 | C5 | PY      | MIN | 1.176961 |
| 73 | C5 | PY      | RYD | 0.006360 |
| 74 | C5 | PZ      | MIN | 0.961742 |
| 75 | C5 | PZ      | RYD | 0.001598 |
| 76 | C5 | DXY     | RYD | 0.001718 |
| 77 | C5 | DXZ     | RYD | 0.000546 |
| 78 | C5 | DYZ     | RYD | 0.001159 |
| 79 | C5 | DXX-YY  | RYD | 0.001678 |
| 80 | C5 | D3ZZ-RR | RYD | 0.001280 |
| 81 | C6 | S       | MIN | 1.999157 |
| 82 | C6 | S       | MIN | 0.838809 |
| 83 | C6 | S       | RYD | 0.003640 |
| 84 | C6 | S       | RYD | 0.000105 |
| 85 | C6 | PX      | MIN | 1.009691 |
| 86 | C6 | PX      | RYD | 0.010802 |
| 87 | C6 | PY      | MIN | 0.972122 |
| 88 | C6 | PY      | RYD | 0.007625 |
| 89 | C6 | PZ      | MIN | 0.864754 |
| 90 | C6 | PZ      | RYD | 0.001134 |
| 91 | C6 | DXY     | RYD | 0.002288 |
| 92 | C6 | DXZ     | RYD | 0.000670 |
| 93 | C6 | DYZ     | RYD | 0.002295 |

|     |    |         |     |          |
|-----|----|---------|-----|----------|
| 94  | C6 | DXX-YY  | RYD | 0.002404 |
| 95  | C6 | D3ZZ-RR | RYD | 0.001021 |
| 96  | C7 | S       | MIN | 1.998878 |
| 97  | C7 | S       | MIN | 0.958603 |
| 98  | C7 | S       | RYD | 0.000707 |
| 99  | C7 | S       | RYD | 0.000040 |
| 100 | C7 | PX      | MIN | 1.176245 |
| 101 | C7 | PX      | RYD | 0.004635 |
| 102 | C7 | PY      | MIN | 1.069483 |
| 103 | C7 | PY      | RYD | 0.005020 |
| 104 | C7 | PZ      | MIN | 0.959855 |
| 105 | C7 | PZ      | RYD | 0.001440 |
| 106 | C7 | DXY     | RYD | 0.001665 |
| 107 | C7 | DXZ     | RYD | 0.000509 |
| 108 | C7 | DYZ     | RYD | 0.001260 |
| 109 | C7 | DXX-YY  | RYD | 0.001580 |
| 110 | C7 | D3ZZ-RR | RYD | 0.001232 |
| 111 | H3 | S       | MIN | 0.763667 |
| 112 | H3 | S       | RYD | 0.000525 |
| 113 | H3 | PX      | RYD | 0.000134 |
| 114 | H3 | PY      | RYD | 0.000474 |
| 115 | H3 | PZ      | RYD | 0.000083 |
| 116 | H4 | S       | MIN | 0.763460 |
| 117 | H4 | S       | RYD | 0.000544 |
| 118 | H4 | PX      | RYD | 0.000181 |
| 119 | H4 | PY      | RYD | 0.000442 |
| 120 | H4 | PZ      | RYD | 0.000072 |
| 121 | N1 | S       | MIN | 1.999380 |
| 122 | N1 | S       | MIN | 1.378795 |
| 123 | N1 | S       | RYD | 0.000485 |
| 124 | N1 | S       | RYD | 0.000015 |
| 125 | N1 | PX      | MIN | 1.623516 |
| 126 | N1 | PX      | RYD | 0.004276 |
| 127 | N1 | PY      | MIN | 1.254374 |
| 128 | N1 | PY      | RYD | 0.003891 |
| 129 | N1 | PZ      | MIN | 1.246202 |
| 130 | N1 | PZ      | RYD | 0.001303 |
| 131 | N1 | DXY     | RYD | 0.003892 |
| 132 | N1 | DXZ     | RYD | 0.002985 |
| 133 | N1 | DYZ     | RYD | 0.001751 |
| 134 | N1 | DXX-YY  | RYD | 0.002990 |
| 135 | N1 | D3ZZ-RR | RYD | 0.002863 |
| 136 | H6 | S       | MIN | 0.751460 |
| 137 | H6 | S       | RYD | 0.000765 |
| 138 | H6 | PX      | RYD | 0.000571 |
| 139 | H6 | PY      | RYD | 0.000022 |
| 140 | H6 | PZ      | RYD | 0.000077 |
| 141 | C8 | S       | MIN | 1.999041 |
| 142 | C8 | S       | MIN | 0.865816 |
| 143 | C8 | S       | RYD | 0.002880 |
| 144 | C8 | S       | RYD | 0.000109 |
| 145 | C8 | PX      | MIN | 0.937354 |
| 146 | C8 | PX      | RYD | 0.009642 |
| 147 | C8 | PY      | MIN | 1.062377 |

|     |     |         |     |          |
|-----|-----|---------|-----|----------|
| 148 | C8  | PY      | RVD | 0.007632 |
| 149 | C8  | PZ      | MIN | 1.009711 |
| 150 | C8  | PZ      | RVD | 0.001605 |
| 151 | C8  | DXY     | RVD | 0.002139 |
| 152 | C8  | DXZ     | RVD | 0.001079 |
| 153 | C8  | DYZ     | RVD | 0.001641 |
| 154 | C8  | DXX-YY  | RVD | 0.002298 |
| 155 | C8  | D3ZZ-RR | RVD | 0.001107 |
| 156 | H8  | S       | MIN | 0.760888 |
| 157 | H8  | S       | RVD | 0.000440 |
| 158 | H8  | PX      | RVD | 0.000538 |
| 159 | H8  | PY      | RVD | 0.000083 |
| 160 | H8  | PZ      | RVD | 0.000088 |
| 161 | C10 | S       | MIN | 1.998994 |
| 162 | C10 | S       | MIN | 1.046941 |
| 163 | C10 | S       | RVD | 0.001135 |
| 164 | C10 | S       | RVD | 0.000016 |
| 165 | C10 | PX      | MIN | 1.220922 |
| 166 | C10 | PX      | RVD | 0.004335 |
| 167 | C10 | PY      | MIN | 1.127537 |
| 168 | C10 | PY      | RVD | 0.003594 |
| 169 | C10 | PZ      | MIN | 0.889253 |
| 170 | C10 | PZ      | RVD | 0.002249 |
| 171 | C10 | DXY     | RVD | 0.001857 |
| 172 | C10 | DXZ     | RVD | 0.000047 |
| 173 | C10 | DYZ     | RVD | 0.001501 |
| 174 | C10 | DXX-YY  | RVD | 0.002020 |
| 175 | C10 | D3ZZ-RR | RVD | 0.001518 |
| 176 | H16 | S       | MIN | 0.782447 |
| 177 | H16 | S       | RVD | 0.000416 |
| 178 | H16 | PX      | RVD | 0.000420 |
| 179 | H16 | PY      | RVD | 0.000203 |
| 180 | H16 | PZ      | RVD | 0.000087 |
| 181 | H18 | S       | MIN | 0.764824 |
| 182 | H18 | S       | RVD | 0.000813 |
| 183 | H18 | PX      | RVD | 0.000526 |
| 184 | H18 | PY      | RVD | 0.000101 |
| 185 | H18 | PZ      | RVD | 0.000072 |

Total MIN occupancy: 67.762094  
Total RVD occupancy: 0.237906  
Total occupancy: 68.000000

#### Natural Atomic Populations and Charges

| Atom  | Occupancy | Charge    |
|-------|-----------|-----------|
| ----- | -----     | -----     |
| H1    | 0.763582  | 0.236418  |
| C1    | 6.196243  | -0.196243 |
| C2    | 6.245483  | -0.245483 |
| C3    | 6.132393  | -0.132393 |
| C4    | 6.238510  | -0.238510 |

|     |          |           |
|-----|----------|-----------|
| C5  | 6.198625 | -0.198625 |
| C6  | 5.716518 | 0.283482  |
| C7  | 6.181153 | -0.181153 |
| H3  | 0.764883 | 0.235117  |
| H4  | 0.764701 | 0.235299  |
| N1  | 7.526719 | -0.526719 |
| H6  | 0.752895 | 0.247105  |
| C8  | 5.904430 | 0.095570  |
| H8  | 0.762037 | 0.237963  |
| C10 | 6.301918 | -0.301918 |
| H16 | 0.783574 | 0.216426  |
| H18 | 0.766336 | 0.233664  |

Total Charge = 0.000000

Q-minus(NAO) = -0.5267

Q-plus(NAO) = 0.2471

Reason for exit: Normal completion

Wall Time: 000:00:00

CPU Time: 000:00:00

TITAN Properties Program: (PC/x86)

Release 6.0.2

#### Closed-Shell Molecular Orbital Coefficients

|              |  |            |            |            |            |            |
|--------------|--|------------|------------|------------|------------|------------|
| MO:          |  | 1          | 2          | 3          | 4          | 5          |
| Eigenvalues: |  | -15.53909  | -11.27106  | -11.26094  | -11.24910  | -11.24814  |
| (ev):        |  | -422.84044 | -306.70126 | -306.42581 | -306.10379 | -306.07750 |

|    |    | A   | A        | A        | A        | A        |          |
|----|----|-----|----------|----------|----------|----------|----------|
| 1  | H1 | S   | -0.00005 | -0.00006 | 0.00008  | 0.00000  | -0.00006 |
| 2  | H1 | S   | -0.00035 | -0.00056 | 0.00066  | 0.00003  | -0.00076 |
| 3  | H1 | PX  | 0.00000  | 0.00000  | -0.00001 | 0.00000  | 0.00000  |
| 4  | H1 | PY  | 0.00000  | 0.00004  | -0.00002 | 0.00000  | -0.00002 |
| 5  | H1 | PZ  | 0.00000  | 0.00000  | 0.00000  | 0.00000  | 0.00000  |
| 6  | C1 | S   | 0.00002  | 0.00077  | -0.00006 | 0.00007  | -0.00833 |
| 7  | C1 | S   | 0.00010  | 0.00030  | -0.00015 | -0.00005 | 0.00015  |
| 8  | C1 | PX  | -0.00003 | -0.00010 | 0.00005  | 0.00000  | -0.00005 |
| 9  | C1 | PY  | -0.00001 | -0.00004 | 0.00003  | 0.00000  | 0.00003  |
| 10 | C1 | PZ  | 0.00000  | 0.00000  | 0.00000  | 0.00000  | 0.00000  |
| 11 | C1 | S   | -0.00114 | -0.00198 | 0.00172  | 0.00041  | -0.00364 |
| 12 | C1 | PX  | 0.00106  | 0.00145  | -0.00190 | -0.00019 | 0.00231  |
| 13 | C1 | PY  | -0.00015 | 0.00003  | 0.00072  | -0.00010 | 0.00025  |
| 14 | C1 | PZ  | 0.00000  | 0.00000  | 0.00000  | 0.00000  | 0.00000  |
| 15 | C1 | DXX | 0.00000  | -0.00004 | -0.00001 | -0.00001 | -0.00006 |
| 16 | C1 | DYY | 0.00002  | -0.00006 | -0.00006 | 0.00001  | -0.00009 |
| 17 | C1 | DZZ | 0.00005  | 0.00013  | -0.00007 | -0.00002 | 0.00015  |
| 18 | C1 | DXY | 0.00000  | 0.00000  | -0.00001 | 0.00000  | 0.00004  |
| 19 | C1 | DXZ | 0.00000  | 0.00000  | 0.00000  | 0.00000  | 0.00000  |
| 20 | C1 | DYZ | 0.00000  | 0.00000  | 0.00000  | 0.00000  | 0.00000  |

|    |    |     |          |          |          |          |          |
|----|----|-----|----------|----------|----------|----------|----------|
| 21 | C2 | S   | -0.00002 | -0.01105 | 0.00015  | 0.00003  | -0.05698 |
| 22 | C2 | S   | -0.00004 | -0.00053 | 0.00013  | 0.00000  | -0.00147 |
| 23 | C2 | PX  | 0.00000  | 0.00014  | 0.00001  | 0.00001  | 0.00008  |
| 24 | C2 | PY  | 0.00005  | -0.00005 | -0.00007 | -0.00002 | 0.00013  |
| 25 | C2 | PZ  | 0.00000  | 0.00000  | 0.00000  | 0.00000  | 0.00000  |
| 26 | C2 | S   | 0.00041  | -0.00160 | -0.00068 | -0.00003 | -0.00082 |
| 27 | C2 | PX  | 0.00003  | -0.00109 | -0.00103 | -0.00013 | 0.00037  |
| 28 | C2 | PY  | -0.00076 | -0.00088 | -0.00039 | -0.00020 | -0.00124 |
| 29 | C2 | PZ  | 0.00000  | 0.00000  | 0.00000  | 0.00000  | 0.00000  |
| 30 | C2 | DXX | -0.00013 | 0.00042  | 0.00001  | 0.00000  | 0.00051  |
| 31 | C2 | DYY | 0.00002  | 0.00066  | 0.00002  | 0.00002  | 0.00046  |
| 32 | C2 | DZZ | -0.00002 | 0.00010  | 0.00006  | 0.00001  | 0.00016  |
| 33 | C2 | DXY | 0.00003  | -0.00022 | 0.00004  | -0.00001 | -0.00004 |
| 34 | C2 | DXZ | 0.00000  | 0.00000  | 0.00000  | 0.00000  | 0.00000  |
| 35 | C2 | DYZ | 0.00000  | 0.00000  | 0.00000  | 0.00000  | 0.00000  |
| 36 | C3 | S   | -0.00001 | -0.01158 | 0.00000  | 0.00041  | 0.00038  |
| 37 | C3 | S   | 0.00003  | -0.00025 | 0.00010  | 0.00007  | 0.00000  |
| 38 | C3 | PX  | -0.00004 | -0.00006 | -0.00006 | 0.00002  | -0.00001 |
| 39 | C3 | PY  | -0.00002 | 0.00000  | -0.00003 | 0.00004  | -0.00004 |
| 40 | C3 | PZ  | 0.00000  | 0.00000  | 0.00000  | 0.00000  | 0.00000  |
| 41 | C3 | S   | 0.00002  | -0.00764 | -0.00269 | -0.00153 | -0.00001 |
| 42 | C3 | PX  | -0.00080 | 0.00282  | 0.00300  | -0.00004 | -0.00020 |
| 43 | C3 | PY  | 0.00101  | 0.00218  | -0.00071 | 0.00043  | 0.00387  |
| 44 | C3 | PZ  | 0.00000  | 0.00000  | 0.00000  | 0.00000  | 0.00000  |
| 45 | C3 | DXX | 0.00000  | 0.00056  | -0.00004 | 0.00000  | 0.00003  |
| 46 | C3 | DYY | -0.00007 | 0.00028  | 0.00021  | -0.00004 | 0.00002  |
| 47 | C3 | DZZ | 0.00001  | 0.00019  | 0.00008  | 0.00000  | 0.00002  |
| 48 | C3 | DXY | 0.00002  | 0.00013  | 0.00000  | -0.00001 | 0.00002  |
| 49 | C3 | DXZ | 0.00000  | 0.00000  | 0.00000  | 0.00000  | 0.00000  |
| 50 | C3 | DYZ | 0.00000  | 0.00000  | 0.00000  | 0.00000  | 0.00000  |
| 51 | C4 | S   | -0.00001 | 0.00013  | 0.00007  | -0.00001 | -0.07202 |
| 52 | C4 | S   | -0.00005 | -0.00011 | 0.00012  | 0.00004  | -0.00224 |
| 53 | C4 | PX  | 0.00000  | -0.00004 | 0.00000  | -0.00001 | -0.00005 |
| 54 | C4 | PY  | -0.00002 | -0.00006 | 0.00002  | -0.00001 | -0.00001 |
| 55 | C4 | PZ  | 0.00000  | 0.00000  | 0.00000  | 0.00000  | 0.00000  |
| 56 | C4 | S   | 0.00141  | 0.00238  | -0.00255 | -0.00032 | -0.00020 |
| 57 | C4 | PX  | -0.00027 | -0.00057 | 0.00021  | 0.00013  | 0.00083  |
| 58 | C4 | PY  | -0.00054 | -0.00101 | 0.00133  | 0.00027  | -0.00116 |
| 59 | C4 | PZ  | 0.00000  | 0.00000  | 0.00000  | 0.00000  | 0.00000  |
| 60 | C4 | DXX | 0.00001  | 0.00005  | 0.00000  | 0.00000  | 0.00081  |
| 61 | C4 | DYY | 0.00000  | 0.00004  | 0.00000  | 0.00000  | 0.00041  |
| 62 | C4 | DZZ | -0.00001 | -0.00001 | 0.00004  | 0.00002  | 0.00024  |
| 63 | C4 | DXY | 0.00000  | 0.00001  | 0.00000  | 0.00000  | -0.00005 |
| 64 | C4 | DXZ | 0.00000  | 0.00000  | 0.00000  | 0.00000  | 0.00000  |
| 65 | C4 | DYZ | 0.00000  | 0.00000  | 0.00000  | 0.00000  | 0.00000  |
| 66 | C5 | S   | 0.00002  | 0.00143  | -0.00011 | -0.00046 | -0.99130 |
| 67 | C5 | S   | 0.00007  | 0.00043  | -0.00016 | -0.00003 | -0.02725 |
| 68 | C5 | PX  | 0.00002  | 0.00006  | -0.00001 | 0.00001  | -0.00015 |
| 69 | C5 | PY  | -0.00004 | -0.00013 | 0.00005  | 0.00000  | 0.00002  |
| 70 | C5 | PZ  | 0.00000  | 0.00000  | 0.00000  | 0.00000  | 0.00000  |
| 71 | C5 | S   | -0.00031 | -0.00039 | 0.00178  | 0.00037  | 0.00998  |
| 72 | C5 | PX  | -0.00073 | -0.00156 | 0.00062  | 0.00005  | 0.00014  |
| 73 | C5 | PY  | 0.00039  | 0.00106  | -0.00122 | -0.00018 | -0.00005 |
| 74 | C5 | PZ  | 0.00000  | 0.00000  | 0.00000  | 0.00000  | 0.00000  |

|     |    |     |          |          |          |          |          |
|-----|----|-----|----------|----------|----------|----------|----------|
| 75  | C5 | DXX | 0.00000  | -0.00005 | -0.00001 | 0.00000  | 0.00165  |
| 76  | C5 | DYY | 0.00003  | -0.00013 | -0.00002 | 0.00000  | 0.00146  |
| 77  | C5 | DZZ | 0.00005  | 0.00015  | -0.00007 | -0.00001 | 0.00245  |
| 78  | C5 | DXY | -0.00001 | -0.00002 | -0.00001 | 0.00000  | -0.00014 |
| 79  | C5 | DXZ | 0.00000  | 0.00000  | 0.00000  | 0.00000  | 0.00000  |
| 80  | C5 | DYZ | 0.00000  | 0.00000  | 0.00000  | 0.00000  | 0.00000  |
| 81  | C6 | S   | -0.00005 | -0.99556 | -0.00040 | -0.00004 | -0.00071 |
| 82  | C6 | S   | -0.00030 | -0.02754 | -0.00038 | -0.00006 | 0.00023  |
| 83  | C6 | PX  | -0.00005 | -0.00006 | -0.00007 | -0.00003 | 0.00001  |
| 84  | C6 | PY  | -0.00009 | 0.00022  | -0.00007 | 0.00005  | 0.00009  |
| 85  | C6 | PZ  | 0.00000  | 0.00000  | 0.00000  | 0.00000  | 0.00000  |
| 86  | C6 | S   | -0.00424 | 0.00877  | 0.00480  | 0.00002  | -0.00015 |
| 87  | C6 | PX  | 0.00018  | 0.00460  | 0.00276  | 0.00037  | -0.00039 |
| 88  | C6 | PY  | 0.00160  | 0.00281  | -0.00122 | -0.00010 | -0.00316 |
| 89  | C6 | PZ  | 0.00000  | 0.00000  | 0.00000  | 0.00000  | 0.00000  |
| 90  | C6 | DXX | 0.00009  | 0.00177  | 0.00006  | 0.00000  | 0.00003  |
| 91  | C6 | DYY | 0.00059  | 0.00094  | 0.00017  | -0.00002 | -0.00010 |
| 92  | C6 | DZZ | 0.00003  | 0.00241  | -0.00009 | -0.00003 | 0.00006  |
| 93  | C6 | DXY | 0.00019  | -0.00008 | -0.00001 | 0.00003  | 0.00002  |
| 94  | C6 | DXZ | 0.00000  | 0.00000  | 0.00000  | 0.00000  | 0.00000  |
| 95  | C6 | DYZ | 0.00000  | 0.00000  | 0.00000  | 0.00000  | 0.00000  |
| 96  | C7 | S   | -0.00002 | 0.00154  | 0.02231  | 0.00586  | -0.00010 |
| 97  | C7 | S   | -0.00005 | -0.00027 | 0.00078  | 0.00020  | -0.00015 |
| 98  | C7 | PX  | -0.00005 | 0.00005  | 0.00006  | 0.00002  | 0.00001  |
| 99  | C7 | PY  | -0.00003 | -0.00005 | 0.00005  | -0.00006 | 0.00004  |
| 100 | C7 | PZ  | 0.00000  | 0.00000  | 0.00000  | 0.00000  | 0.00000  |
| 101 | C7 | S   | 0.00160  | 0.00610  | 0.00335  | 0.00129  | 0.00360  |
| 102 | C7 | PX  | -0.00097 | -0.00416 | -0.00120 | -0.00073 | -0.00147 |
| 103 | C7 | PY  | 0.00105  | 0.00112  | -0.00258 | 0.00063  | 0.00105  |
| 104 | C7 | PZ  | 0.00000  | 0.00000  | 0.00000  | 0.00000  | 0.00000  |
| 105 | C7 | DXX | 0.00000  | -0.00006 | -0.00072 | -0.00010 | 0.00002  |
| 106 | C7 | DYY | -0.00002 | -0.00009 | -0.00034 | -0.00007 | 0.00001  |
| 107 | C7 | DZZ | -0.00001 | -0.00017 | -0.00015 | -0.00002 | -0.00005 |
| 108 | C7 | DXY | 0.00002  | 0.00008  | -0.00013 | -0.00007 | 0.00000  |
| 109 | C7 | DXZ | 0.00000  | 0.00000  | 0.00000  | 0.00000  | 0.00000  |
| 110 | C7 | DYZ | 0.00000  | 0.00000  | 0.00000  | 0.00000  | 0.00000  |
| 111 | H3 | S   | 0.00000  | 0.00000  | -0.00001 | -0.00001 | 0.00010  |
| 112 | H3 | S   | 0.00010  | 0.00023  | -0.00029 | -0.00010 | 0.00021  |
| 113 | H3 | PX  | 0.00000  | 0.00001  | 0.00001  | 0.00000  | 0.00002  |
| 114 | H3 | PY  | 0.00001  | 0.00002  | -0.00001 | 0.00000  | 0.00006  |
| 115 | H3 | PZ  | 0.00000  | 0.00000  | 0.00000  | 0.00000  | 0.00000  |
| 116 | H4 | S   | -0.00006 | -0.00012 | 0.00006  | 0.00000  | 0.00025  |
| 117 | H4 | S   | -0.00027 | -0.00079 | 0.00043  | 0.00004  | -0.00186 |
| 118 | H4 | PX  | 0.00001  | 0.00003  | 0.00000  | 0.00000  | 0.00014  |
| 119 | H4 | PY  | 0.00002  | 0.00001  | 0.00000  | 0.00000  | -0.00021 |
| 120 | H4 | PZ  | 0.00000  | 0.00000  | 0.00000  | 0.00000  | 0.00000  |
| 121 | N1 | S   | -0.99524 | 0.00031  | -0.00011 | -0.00004 | 0.00004  |
| 122 | N1 | S   | -0.02515 | -0.00072 | 0.00073  | 0.00001  | 0.00015  |
| 123 | N1 | PX  | -0.00197 | 0.00006  | 0.00002  | -0.00003 | -0.00001 |
| 124 | N1 | PY  | -0.00078 | -0.00009 | -0.00011 | -0.00003 | 0.00000  |
| 125 | N1 | PZ  | 0.00000  | 0.00000  | 0.00000  | 0.00000  | 0.00000  |
| 126 | N1 | S   | 0.00731  | 0.00539  | -0.00350 | 0.00086  | -0.00201 |
| 127 | N1 | PX  | 0.00294  | 0.00164  | -0.00208 | 0.00018  | -0.00006 |
| 128 | N1 | PY  | 0.00070  | 0.00204  | 0.00046  | 0.00006  | -0.00076 |

|     |     |     |          |          |          |          |          |
|-----|-----|-----|----------|----------|----------|----------|----------|
| 129 | N1  | PZ  | 0.00000  | 0.00000  | 0.00000  | 0.00000  | 0.00000  |
| 130 | N1  | DXX | 0.00282  | 0.00015  | -0.00040 | -0.00010 | 0.00012  |
| 131 | N1  | DYY | 0.00262  | 0.00013  | -0.00011 | -0.00016 | 0.00003  |
| 132 | N1  | DZZ | 0.00306  | -0.00047 | 0.00041  | -0.00002 | 0.00007  |
| 133 | N1  | DXY | -0.00021 | 0.00004  | 0.00023  | 0.00009  | 0.00000  |
| 134 | N1  | DXZ | 0.00000  | 0.00000  | 0.00000  | 0.00000  | 0.00000  |
| 135 | N1  | DYZ | 0.00000  | 0.00000  | 0.00000  | 0.00000  | 0.00000  |
| 136 | H6  | S   | -0.00002 | -0.00009 | -0.00004 | -0.00001 | 0.00001  |
| 137 | H6  | S   | -0.00001 | -0.00031 | -0.00037 | -0.00004 | 0.00017  |
| 138 | H6  | PX  | 0.00003  | -0.00010 | 0.00000  | 0.00000  | -0.00013 |
| 139 | H6  | PY  | 0.00004  | 0.00003  | -0.00001 | 0.00000  | -0.00004 |
| 140 | H6  | PZ  | 0.00000  | 0.00000  | 0.00000  | 0.00000  | 0.00000  |
| 141 | C8  | S   | -0.00002 | -0.00036 | 0.99275  | 0.07266  | -0.00008 |
| 142 | C8  | S   | -0.00039 | 0.00031  | 0.02727  | 0.00233  | 0.00010  |
| 143 | C8  | PX  | 0.00013  | 0.00011  | -0.00014 | -0.00005 | -0.00003 |
| 144 | C8  | PY  | -0.00011 | 0.00003  | 0.00033  | -0.00020 | 0.00003  |
| 145 | C8  | PZ  | 0.00000  | 0.00000  | 0.00000  | 0.00000  | 0.00000  |
| 146 | C8  | S   | -0.00284 | -0.00345 | -0.01032 | -0.00573 | -0.00104 |
| 147 | C8  | PX  | 0.00160  | -0.00116 | -0.00387 | 0.00015  | -0.00044 |
| 148 | C8  | PY  | -0.00214 | -0.00501 | 0.00107  | 0.00116  | -0.00113 |
| 149 | C8  | PZ  | 0.00000  | 0.00000  | 0.00000  | 0.00000  | 0.00000  |
| 150 | C8  | DXX | 0.00023  | -0.00013 | -0.00169 | 0.00024  | -0.00001 |
| 151 | C8  | DYY | 0.00017  | -0.00014 | -0.00103 | 0.00021  | 0.00001  |
| 152 | C8  | DZZ | 0.00008  | 0.00006  | -0.00237 | -0.00007 | 0.00004  |
| 153 | C8  | DXY | -0.00019 | 0.00010  | -0.00010 | -0.00001 | -0.00001 |
| 154 | C8  | DXZ | 0.00000  | 0.00000  | 0.00000  | 0.00000  | 0.00000  |
| 155 | C8  | DYZ | 0.00000  | 0.00000  | 0.00000  | 0.00000  | 0.00000  |
| 156 | H8  | S   | 0.00007  | 0.00017  | -0.00008 | 0.00004  | 0.00002  |
| 157 | H8  | S   | 0.00039  | 0.00123  | -0.00038 | 0.00031  | 0.00042  |
| 158 | H8  | PX  | -0.00001 | -0.00002 | -0.00005 | -0.00002 | 0.00000  |
| 159 | H8  | PY  | -0.00002 | 0.00002  | 0.00013  | -0.00003 | -0.00001 |
| 160 | H8  | PZ  | 0.00000  | 0.00000  | 0.00000  | 0.00000  | 0.00000  |
| 161 | C10 | S   | -0.00001 | 0.00000  | 0.07207  | -0.99301 | 0.00045  |
| 162 | C10 | S   | 0.00001  | -0.00002 | 0.00172  | -0.02741 | 0.00002  |
| 163 | C10 | PX  | 0.00001  | 0.00003  | -0.00002 | -0.00011 | -0.00002 |
| 164 | C10 | PY  | 0.00000  | -0.00009 | -0.00025 | -0.00001 | -0.00001 |
| 165 | C10 | PZ  | 0.00000  | 0.00000  | 0.00000  | 0.00000  | 0.00000  |
| 166 | C10 | S   | -0.00064 | -0.00264 | 0.00318  | 0.01172  | -0.00056 |
| 167 | C10 | PX  | -0.00076 | -0.00002 | 0.00166  | 0.00011  | 0.00029  |
| 168 | C10 | PY  | -0.00008 | -0.00080 | 0.00138  | 0.00105  | -0.00024 |
| 169 | C10 | PZ  | 0.00000  | 0.00000  | 0.00000  | 0.00000  | 0.00000  |
| 170 | C10 | DXX | -0.00007 | -0.00006 | -0.00055 | 0.00168  | -0.00001 |
| 171 | C10 | DYY | 0.00000  | 0.00001  | -0.00057 | 0.00141  | -0.00001 |
| 172 | C10 | DZZ | 0.00001  | -0.00003 | -0.00026 | 0.00256  | 0.00000  |
| 173 | C10 | DXY | -0.00010 | 0.00005  | 0.00008  | 0.00001  | 0.00001  |
| 174 | C10 | DXZ | 0.00000  | 0.00000  | 0.00000  | 0.00000  | 0.00000  |
| 175 | C10 | DYZ | 0.00000  | 0.00000  | 0.00000  | 0.00000  | 0.00000  |
| 176 | H16 | S   | 0.00006  | 0.00006  | -0.00011 | 0.00027  | -0.00002 |
| 177 | H16 | S   | 0.00029  | 0.00006  | -0.00050 | -0.00197 | -0.00012 |
| 178 | H16 | PX  | 0.00001  | -0.00002 | -0.00008 | -0.00027 | 0.00000  |
| 179 | H16 | PY  | 0.00000  | 0.00001  | 0.00011  | 0.00010  | 0.00000  |
| 180 | H16 | PZ  | 0.00000  | 0.00000  | 0.00000  | 0.00000  | 0.00000  |
| 181 | H18 | S   | -0.00003 | -0.00001 | 0.00011  | 0.00022  | 0.00004  |
| 182 | H18 | S   | -0.00020 | 0.00010  | 0.00068  | -0.00194 | 0.00010  |



|     |     |    |         |          |         |         |         |
|-----|-----|----|---------|----------|---------|---------|---------|
| 183 | H18 | PX | 0.00004 | 0.00001  | 0.00009 | 0.00022 | 0.00000 |
| 184 | H18 | PY | 0.00002 | -0.00001 | 0.00011 | 0.00005 | 0.00000 |
| 185 | H18 | PZ | 0.00000 | 0.00000  | 0.00000 | 0.00000 | 0.00000 |

|              |  |            |            |            |            |            |
|--------------|--|------------|------------|------------|------------|------------|
| MO:          |  | 6          | 7          | 8          | 9          | 10         |
| Eigenvalues: |  | -11.24548  | -11.24411  | -11.24241  | -11.23867  | -11.23421  |
| (ev):        |  | -306.00533 | -305.96782 | -305.92176 | -305.81997 | -305.69865 |

|    |    | A   | A        | A        | A        | A        |          |
|----|----|-----|----------|----------|----------|----------|----------|
| 1  | H1 | S   | 0.00028  | 0.00004  | 0.00007  | 0.00001  | -0.00003 |
| 2  | H1 | S   | -0.00175 | 0.00057  | -0.00106 | -0.00018 | -0.00070 |
| 3  | H1 | PX  | -0.00022 | 0.00002  | -0.00022 | -0.00013 | -0.00002 |
| 4  | H1 | PY  | -0.00004 | -0.00001 | 0.00003  | 0.00002  | -0.00001 |
| 5  | H1 | PZ  | 0.00000  | 0.00000  | 0.00000  | 0.00000  | 0.00000  |
| 6  | C1 | S   | -0.95337 | 0.03077  | -0.27760 | -0.06524 | -0.00041 |
| 7  | C1 | S   | -0.02630 | 0.00067  | -0.00767 | -0.00173 | 0.00029  |
| 8  | C1 | PX  | 0.00015  | 0.00001  | 0.00013  | 0.00014  | 0.00002  |
| 9  | C1 | PY  | 0.00024  | -0.00007 | -0.00003 | 0.00020  | 0.00007  |
| 10 | C1 | PZ  | 0.00000  | 0.00000  | 0.00000  | 0.00000  | 0.00000  |
| 11 | C1 | S   | 0.00840  | 0.00260  | 0.00266  | 0.00377  | -0.00490 |
| 12 | C1 | PX  | -0.00007 | -0.00181 | 0.00104  | -0.00069 | 0.00263  |
| 13 | C1 | PY  | 0.00014  | -0.00002 | 0.00144  | -0.00103 | 0.00079  |
| 14 | C1 | PZ  | 0.00000  | 0.00000  | 0.00000  | 0.00000  | 0.00000  |
| 15 | C1 | DXX | 0.00158  | 0.00001  | 0.00000  | -0.00040 | -0.00009 |
| 16 | C1 | DYY | 0.00160  | -0.00003 | 0.00007  | -0.00058 | -0.00006 |
| 17 | C1 | DZZ | 0.00237  | -0.00011 | 0.00071  | 0.00002  | 0.00008  |
| 18 | C1 | DXY | 0.00013  | -0.00001 | 0.00002  | -0.00026 | -0.00002 |
| 19 | C1 | DXZ | 0.00000  | 0.00000  | 0.00000  | 0.00000  | 0.00000  |
| 20 | C1 | DYZ | 0.00000  | 0.00000  | 0.00000  | 0.00000  | 0.00000  |
| 21 | C2 | S   | 0.00327  | -0.00002 | -0.00995 | -0.00583 | 0.99383  |
| 22 | C2 | S   | -0.00003 | 0.00019  | -0.00070 | -0.00030 | 0.02758  |
| 23 | C2 | PX  | 0.00005  | 0.00001  | -0.00002 | -0.00004 | 0.00030  |
| 24 | C2 | PY  | -0.00005 | 0.00003  | -0.00001 | 0.00001  | -0.00010 |
| 25 | C2 | PZ  | 0.00000  | 0.00000  | 0.00000  | 0.00000  | 0.00000  |
| 26 | C2 | S   | 0.00287  | -0.00316 | 0.00463  | 0.00032  | -0.00969 |
| 27 | C2 | PX  | 0.00126  | -0.00212 | 0.00270  | 0.00016  | -0.00009 |
| 28 | C2 | PY  | -0.00069 | -0.00040 | -0.00073 | -0.00017 | -0.00049 |
| 29 | C2 | PZ  | 0.00000  | 0.00000  | 0.00000  | 0.00000  | 0.00000  |
| 30 | C2 | DXX | 0.00002  | -0.00007 | 0.00015  | 0.00008  | -0.00153 |
| 31 | C2 | DYY | -0.00002 | 0.00002  | 0.00018  | 0.00010  | -0.00151 |
| 32 | C2 | DZZ | -0.00003 | 0.00006  | -0.00012 | -0.00003 | -0.00249 |
| 33 | C2 | DXY | -0.00002 | 0.00000  | 0.00003  | -0.00003 | 0.00014  |
| 34 | C2 | DXZ | 0.00000  | 0.00000  | 0.00000  | 0.00000  | 0.00000  |
| 35 | C2 | DYZ | 0.00000  | 0.00000  | 0.00000  | 0.00000  | 0.00000  |
| 36 | C3 | S   | -0.06061 | -0.14358 | -0.03720 | 0.98259  | 0.00548  |
| 37 | C3 | S   | -0.00163 | -0.00364 | -0.00118 | 0.02765  | 0.00007  |
| 38 | C3 | PX  | 0.00006  | -0.00001 | 0.00005  | -0.00014 | 0.00003  |
| 39 | C3 | PY  | 0.00003  | -0.00019 | -0.00012 | -0.00002 | -0.00016 |
| 40 | C3 | PZ  | 0.00000  | 0.00000  | 0.00000  | 0.00000  | 0.00000  |
| 41 | C3 | S   | -0.00488 | -0.00538 | -0.00244 | -0.01646 | -0.00156 |
| 42 | C3 | PX  | 0.00039  | 0.00017  | -0.00048 | 0.00126  | 0.00053  |
| 43 | C3 | PY  | 0.00238  | -0.00009 | 0.00563  | 0.00150  | 0.00590  |
| 44 | C3 | PZ  | 0.00000  | 0.00000  | 0.00000  | 0.00000  | 0.00000  |
| 45 | C3 | DXX | 0.00045  | 0.00058  | 0.00021  | -0.00175 | 0.00007  |

|    |    |     |          |          |          |          |          |
|----|----|-----|----------|----------|----------|----------|----------|
| 46 | C3 | DYY | 0.00060  | 0.00059  | 0.00035  | -0.00099 | 0.00002  |
| 47 | C3 | DZZ | 0.00029  | 0.00047  | 0.00012  | -0.00229 | -0.00003 |
| 48 | C3 | DXY | 0.00020  | 0.00007  | 0.00008  | 0.00012  | 0.00003  |
| 49 | C3 | DXZ | 0.00000  | 0.00000  | 0.00000  | 0.00000  | 0.00000  |
| 50 | C3 | DYZ | 0.00000  | 0.00000  | 0.00000  | 0.00000  | 0.00000  |
| 51 | C4 | S   | -0.27703 | 0.02303  | 0.95303  | 0.02234  | 0.00638  |
| 52 | C4 | S   | -0.00749 | 0.00084  | 0.02627  | 0.00045  | -0.00011 |
| 53 | C4 | PX  | 0.00015  | -0.00004 | -0.00012 | 0.00002  | 0.00008  |
| 54 | C4 | PY  | -0.00010 | 0.00000  | -0.00012 | 0.00002  | 0.00000  |
| 55 | C4 | PZ  | 0.00000  | 0.00000  | 0.00000  | 0.00000  | 0.00000  |
| 56 | C4 | S   | 0.00074  | -0.00273 | -0.01004 | -0.00071 | 0.00211  |
| 57 | C4 | PX  | -0.00115 | 0.00058  | -0.00012 | -0.00001 | -0.00057 |
| 58 | C4 | PY  | 0.00063  | 0.00169  | -0.00002 | -0.00002 | -0.00161 |
| 59 | C4 | PZ  | 0.00000  | 0.00000  | 0.00000  | 0.00000  | 0.00000  |
| 60 | C4 | DXX | 0.00079  | -0.00004 | -0.00139 | 0.00006  | 0.00014  |
| 61 | C4 | DYY | 0.00077  | -0.00010 | -0.00127 | 0.00014  | 0.00006  |
| 62 | C4 | DZZ | 0.00071  | 0.00001  | -0.00234 | -0.00010 | -0.00009 |
| 63 | C4 | DXY | 0.00007  | 0.00000  | -0.00014 | -0.00003 | 0.00003  |
| 64 | C4 | DXZ | 0.00000  | 0.00000  | 0.00000  | 0.00000  | 0.00000  |
| 65 | C4 | DYZ | 0.00000  | 0.00000  | 0.00000  | 0.00000  | 0.00000  |
| 66 | C5 | S   | 0.02813  | -0.00194 | -0.06663 | -0.00035 | -0.05820 |
| 67 | C5 | S   | 0.00095  | -0.00016 | -0.00148 | -0.00001 | -0.00170 |
| 68 | C5 | PX  | 0.00010  | 0.00000  | -0.00004 | -0.00002 | 0.00011  |
| 69 | C5 | PY  | -0.00001 | -0.00002 | -0.00001 | 0.00003  | 0.00014  |
| 70 | C5 | PZ  | 0.00000  | 0.00000  | 0.00000  | 0.00000  | 0.00000  |
| 71 | C5 | S   | -0.00220 | 0.00282  | 0.00110  | 0.00017  | 0.00292  |
| 72 | C5 | PX  | -0.00099 | 0.00043  | 0.00030  | 0.00006  | -0.00112 |
| 73 | C5 | PY  | 0.00086  | -0.00137 | 0.00161  | 0.00000  | -0.00065 |
| 74 | C5 | PZ  | 0.00000  | 0.00000  | 0.00000  | 0.00000  | 0.00000  |
| 75 | C5 | DXX | 0.00004  | 0.00000  | -0.00058 | -0.00007 | -0.00031 |
| 76 | C5 | DYY | 0.00001  | 0.00001  | -0.00021 | -0.00005 | -0.00035 |
| 77 | C5 | DZZ | 0.00002  | -0.00002 | 0.00014  | -0.00003 | 0.00012  |
| 78 | C5 | DXY | 0.00007  | 0.00000  | -0.00008 | 0.00001  | 0.00001  |
| 79 | C5 | DXZ | 0.00000  | 0.00000  | 0.00000  | 0.00000  | 0.00000  |
| 80 | C5 | DYZ | 0.00000  | 0.00000  | 0.00000  | 0.00000  | 0.00000  |
| 81 | C6 | S   | -0.00004 | 0.00010  | 0.00046  | -0.01203 | -0.01154 |
| 82 | C6 | S   | 0.00011  | -0.00009 | 0.00019  | -0.00025 | -0.00018 |
| 83 | C6 | PX  | 0.00004  | -0.00001 | 0.00000  | -0.00006 | 0.00008  |
| 84 | C6 | PY  | 0.00012  | -0.00001 | 0.00009  | 0.00005  | 0.00001  |
| 85 | C6 | PZ  | 0.00000  | 0.00000  | 0.00000  | 0.00000  | 0.00000  |
| 86 | C6 | S   | 0.00031  | 0.00046  | -0.00148 | 0.00528  | 0.00431  |
| 87 | C6 | PX  | 0.00115  | 0.00097  | 0.00060  | 0.00226  | -0.00003 |
| 88 | C6 | PY  | -0.00301 | 0.00322  | -0.00469 | -0.00096 | -0.00275 |
| 89 | C6 | PZ  | 0.00000  | 0.00000  | 0.00000  | 0.00000  | 0.00000  |
| 90 | C6 | DXX | 0.00001  | -0.00008 | 0.00003  | -0.00059 | -0.00033 |
| 91 | C6 | DYY | 0.00000  | -0.00006 | -0.00004 | -0.00028 | -0.00051 |
| 92 | C6 | DZZ | 0.00004  | -0.00005 | 0.00003  | -0.00012 | -0.00008 |
| 93 | C6 | DXY | 0.00000  | 0.00003  | -0.00001 | 0.00006  | 0.00018  |
| 94 | C6 | DXZ | 0.00000  | 0.00000  | 0.00000  | 0.00000  | 0.00000  |
| 95 | C6 | DYZ | 0.00000  | 0.00000  | 0.00000  | 0.00000  | 0.00000  |
| 96 | C7 | S   | -0.02747 | -0.98415 | 0.01912  | -0.14547 | -0.00065 |
| 97 | C7 | S   | -0.00091 | -0.02740 | 0.00025  | -0.00438 | -0.00024 |
| 98 | C7 | PX  | 0.00006  | 0.00020  | 0.00000  | 0.00016  | -0.00002 |
| 99 | C7 | PY  | 0.00008  | -0.00003 | 0.00007  | -0.00021 | 0.00009  |

|     |    |     |          |          |          |          |          |
|-----|----|-----|----------|----------|----------|----------|----------|
| 100 | C7 | PZ  | 0.00000  | 0.00000  | 0.00000  | 0.00000  | 0.00000  |
| 101 | C7 | S   | 0.00449  | 0.01233  | 0.00615  | 0.00820  | 0.00575  |
| 102 | C7 | PX  | -0.00221 | -0.00237 | -0.00233 | -0.00188 | -0.00234 |
| 103 | C7 | PY  | 0.00081  | 0.00057  | 0.00195  | 0.00178  | 0.00158  |
| 104 | C7 | PZ  | 0.00000  | 0.00000  | 0.00000  | 0.00000  | 0.00000  |
| 105 | C7 | DXX | 0.00004  | 0.00145  | -0.00002 | -0.00032 | 0.00004  |
| 106 | C7 | DYY | 0.00003  | 0.00160  | -0.00001 | -0.00016 | 0.00003  |
| 107 | C7 | DZZ | 0.00004  | 0.00236  | -0.00014 | 0.00023  | -0.00006 |
| 108 | C7 | DXY | 0.00005  | 0.00030  | 0.00003  | 0.00024  | -0.00002 |
| 109 | C7 | DXZ | 0.00000  | 0.00000  | 0.00000  | 0.00000  | 0.00000  |
| 110 | C7 | DYZ | 0.00000  | 0.00000  | 0.00000  | 0.00000  | 0.00000  |
| 111 | H3 | S   | 0.00005  | -0.00005 | -0.00025 | -0.00001 | 0.00006  |
| 112 | H3 | S   | -0.00042 | -0.00045 | 0.00188  | 0.00019  | 0.00057  |
| 113 | H3 | PX  | -0.00001 | 0.00000  | 0.00013  | 0.00002  | -0.00003 |
| 114 | H3 | PY  | 0.00008  | -0.00002 | 0.00027  | 0.00003  | 0.00003  |
| 115 | H3 | PZ  | 0.00000  | 0.00000  | 0.00000  | 0.00000  | 0.00000  |
| 116 | H4 | S   | -0.00004 | 0.00002  | -0.00010 | 0.00001  | 0.00003  |
| 117 | H4 | S   | -0.00034 | 0.00026  | -0.00068 | 0.00001  | -0.00028 |
| 118 | H4 | PX  | -0.00003 | 0.00000  | 0.00004  | 0.00000  | 0.00006  |
| 119 | H4 | PY  | 0.00000  | 0.00001  | -0.00009 | -0.00002 | -0.00017 |
| 120 | H4 | PZ  | 0.00000  | 0.00000  | 0.00000  | 0.00000  | 0.00000  |
| 121 | N1 | S   | 0.00003  | -0.00011 | 0.00003  | 0.00007  | 0.00007  |
| 122 | N1 | S   | 0.00013  | -0.00029 | 0.00011  | 0.00019  | 0.00014  |
| 123 | N1 | PX  | -0.00001 | -0.00002 | 0.00000  | 0.00005  | 0.00005  |
| 124 | N1 | PY  | -0.00005 | -0.00002 | -0.00004 | -0.00001 | -0.00004 |
| 125 | N1 | PZ  | 0.00000  | 0.00000  | 0.00000  | 0.00000  | 0.00000  |
| 126 | N1 | S   | -0.00175 | 0.00408  | -0.00204 | -0.00220 | -0.00278 |
| 127 | N1 | PX  | -0.00038 | 0.00092  | -0.00024 | -0.00075 | -0.00036 |
| 128 | N1 | PY  | -0.00019 | 0.00083  | -0.00041 | -0.00001 | -0.00064 |
| 129 | N1 | PZ  | 0.00000  | 0.00000  | 0.00000  | 0.00000  | 0.00000  |
| 130 | N1 | DXX | 0.00006  | -0.00027 | 0.00008  | 0.00016  | 0.00018  |
| 131 | N1 | DYY | 0.00005  | -0.00017 | 0.00006  | 0.00016  | 0.00017  |
| 132 | N1 | DZZ | 0.00005  | -0.00019 | 0.00004  | 0.00014  | 0.00005  |
| 133 | N1 | DXY | -0.00003 | 0.00002  | -0.00002 | 0.00004  | 0.00000  |
| 134 | N1 | DXZ | 0.00000  | 0.00000  | 0.00000  | 0.00000  | 0.00000  |
| 135 | N1 | DYZ | 0.00000  | 0.00000  | 0.00000  | 0.00000  | 0.00000  |
| 136 | H6 | S   | -0.00002 | -0.00006 | 0.00004  | 0.00000  | -0.00028 |
| 137 | H6 | S   | 0.00023  | -0.00059 | 0.00078  | 0.00013  | 0.00191  |
| 138 | H6 | PX  | -0.00001 | 0.00002  | -0.00003 | 0.00000  | -0.00027 |
| 139 | H6 | PY  | 0.00002  | 0.00001  | 0.00003  | -0.00001 | 0.00002  |
| 140 | H6 | PZ  | 0.00000  | 0.00000  | 0.00000  | 0.00000  | 0.00000  |
| 141 | C8 | S   | 0.00066  | 0.02278  | -0.00047 | 0.00339  | -0.00009 |
| 142 | C8 | S   | 0.00016  | 0.00054  | 0.00015  | 0.00005  | 0.00015  |
| 143 | C8 | PX  | -0.00004 | 0.00008  | -0.00005 | 0.00001  | -0.00005 |
| 144 | C8 | PY  | 0.00002  | 0.00001  | 0.00006  | 0.00007  | 0.00008  |
| 145 | C8 | PZ  | 0.00000  | 0.00000  | 0.00000  | 0.00000  | 0.00000  |
| 146 | C8 | S   | -0.00155 | -0.00480 | -0.00138 | -0.00123 | -0.00118 |
| 147 | C8 | PX  | -0.00121 | -0.00094 | -0.00092 | -0.00158 | -0.00098 |
| 148 | C8 | PY  | -0.00148 | -0.00170 | -0.00207 | -0.00073 | -0.00168 |
| 149 | C8 | PZ  | 0.00000  | 0.00000  | 0.00000  | 0.00000  | 0.00000  |
| 150 | C8 | DXX | 0.00001  | 0.00040  | -0.00002 | 0.00014  | -0.00002 |
| 151 | C8 | DYY | 0.00002  | 0.00041  | 0.00001  | 0.00024  | 0.00005  |
| 152 | C8 | DZZ | 0.00004  | 0.00007  | 0.00005  | 0.00006  | 0.00006  |
| 153 | C8 | DXY | -0.00004 | 0.00021  | -0.00004 | 0.00009  | -0.00002 |

|     |     |     |          |          |          |          |          |
|-----|-----|-----|----------|----------|----------|----------|----------|
| 154 | C8  | DXZ | 0.00000  | 0.00000  | 0.00000  | 0.00000  | 0.00000  |
| 155 | C8  | DYZ | 0.00000  | 0.00000  | 0.00000  | 0.00000  | 0.00000  |
| 156 | H8  | S   | 0.00008  | 0.00048  | 0.00000  | 0.00010  | 0.00001  |
| 157 | H8  | S   | 0.00059  | -0.00121 | 0.00070  | -0.00003 | 0.00062  |
| 158 | H8  | PX  | -0.00001 | -0.00031 | 0.00000  | -0.00019 | 0.00001  |
| 159 | H8  | PY  | 0.00002  | 0.00009  | -0.00003 | 0.00006  | -0.00002 |
| 160 | H8  | PZ  | 0.00000  | 0.00000  | 0.00000  | 0.00000  | 0.00000  |
| 161 | C10 | S   | -0.00023 | -0.00425 | 0.00005  | -0.00023 | 0.00004  |
| 162 | C10 | S   | -0.00001 | -0.00004 | 0.00000  | 0.00001  | 0.00001  |
| 163 | C10 | PX  | -0.00002 | 0.00006  | -0.00004 | -0.00002 | -0.00003 |
| 164 | C10 | PY  | -0.00002 | -0.00002 | -0.00004 | -0.00004 | -0.00004 |
| 165 | C10 | PZ  | 0.00000  | 0.00000  | 0.00000  | 0.00000  | 0.00000  |
| 166 | C10 | S   | -0.00066 | -0.00001 | -0.00113 | -0.00030 | -0.00095 |
| 167 | C10 | PX  | 0.00052  | -0.00029 | 0.00052  | 0.00070  | 0.00049  |
| 168 | C10 | PY  | -0.00030 | -0.00008 | -0.00041 | -0.00014 | -0.00039 |
| 169 | C10 | PZ  | 0.00000  | 0.00000  | 0.00000  | 0.00000  | 0.00000  |
| 170 | C10 | DXX | -0.00001 | -0.00004 | -0.00002 | 0.00000  | -0.00001 |
| 171 | C10 | DYY | -0.00001 | -0.00013 | -0.00001 | -0.00008 | -0.00003 |
| 172 | C10 | DZZ | 0.00000  | 0.00005  | -0.00001 | 0.00001  | 0.00000  |
| 173 | C10 | DXY | 0.00002  | 0.00002  | 0.00001  | 0.00005  | 0.00002  |
| 174 | C10 | DXZ | 0.00000  | 0.00000  | 0.00000  | 0.00000  | 0.00000  |
| 175 | C10 | DYZ | 0.00000  | 0.00000  | 0.00000  | 0.00000  | 0.00000  |
| 176 | H16 | S   | -0.00004 | 0.00008  | -0.00004 | -0.00005 | -0.00004 |
| 177 | H16 | S   | -0.00022 | 0.00007  | -0.00016 | -0.00021 | -0.00017 |
| 178 | H16 | PX  | 0.00000  | -0.00001 | -0.00001 | -0.00001 | 0.00000  |
| 179 | H16 | PY  | 0.00000  | 0.00003  | 0.00000  | 0.00001  | 0.00000  |
| 180 | H16 | PZ  | 0.00000  | 0.00000  | 0.00000  | 0.00000  | 0.00000  |
| 181 | H18 | S   | 0.00005  | -0.00004 | 0.00007  | 0.00006  | 0.00006  |
| 182 | H18 | S   | 0.00016  | -0.00024 | 0.00021  | 0.00025  | 0.00017  |
| 183 | H18 | PX  | 0.00000  | 0.00001  | 0.00001  | 0.00000  | 0.00000  |
| 184 | H18 | PY  | 0.00000  | -0.00001 | 0.00000  | 0.00000  | 0.00000  |
| 185 | H18 | PZ  | 0.00000  | 0.00000  | 0.00000  | 0.00000  | 0.00000  |

|              |           |           |           |           |           |
|--------------|-----------|-----------|-----------|-----------|-----------|
| MO:          | 11        | 12        | 13        | 14        | 15        |
| Eigenvalues: | -1.27357  | -1.13269  | -1.07025  | -1.03312  | -0.99958  |
| (ev):        | -34.65549 | -30.82212 | -29.12296 | -28.11256 | -27.20010 |

|    |    |     |          |          |          |          |          |
|----|----|-----|----------|----------|----------|----------|----------|
|    |    | A   | A        | A        | A        | A        |          |
| 1  | H1 | S   | 0.00508  | 0.04286  | -0.03663 | 0.01218  | -0.06232 |
| 2  | H1 | S   | -0.00659 | 0.00783  | -0.01223 | 0.00554  | -0.01052 |
| 3  | H1 | PX  | -0.00056 | -0.00474 | 0.00373  | -0.00106 | 0.00637  |
| 4  | H1 | PY  | 0.00007  | -0.00008 | 0.00052  | -0.00051 | -0.00063 |
| 5  | H1 | PZ  | 0.00000  | 0.00000  | 0.00000  | 0.00000  | 0.00000  |
| 6  | C1 | S   | -0.01704 | -0.10122 | 0.06278  | -0.01742 | 0.10159  |
| 7  | C1 | S   | 0.03515  | 0.19254  | -0.11923 | 0.03329  | -0.19743 |
| 8  | C1 | PX  | -0.01380 | -0.06328 | 0.01518  | 0.00202  | 0.03112  |
| 9  | C1 | PY  | -0.01048 | 0.02228  | 0.02771  | -0.05775 | -0.09198 |
| 10 | C1 | PZ  | 0.00000  | 0.00000  | 0.00000  | 0.00000  | 0.00000  |
| 11 | C1 | S   | 0.00014  | 0.12411  | -0.09381 | 0.03294  | -0.12199 |
| 12 | C1 | PX  | 0.01674  | -0.00861 | 0.00974  | -0.00553 | -0.02028 |
| 13 | C1 | PY  | -0.00405 | 0.00374  | 0.00297  | -0.01056 | -0.01688 |
| 14 | C1 | PZ  | 0.00000  | 0.00000  | 0.00000  | 0.00000  | 0.00000  |
| 15 | C1 | DXX | 0.00039  | 0.00323  | -0.00048 | -0.00005 | -0.00250 |
| 16 | C1 | DYY | 0.00237  | 0.00761  | -0.00732 | 0.00388  | -0.00386 |

|    |    |     |          |          |          |          |          |
|----|----|-----|----------|----------|----------|----------|----------|
| 17 | C1 | DZZ | -0.00110 | -0.00879 | 0.00572  | -0.00196 | 0.00720  |
| 18 | C1 | DXY | 0.00111  | -0.00303 | -0.00176 | 0.00572  | 0.00805  |
| 19 | C1 | DXZ | 0.00000  | 0.00000  | 0.00000  | 0.00000  | 0.00000  |
| 20 | C1 | DYZ | 0.00000  | 0.00000  | 0.00000  | 0.00000  | 0.00000  |
| 21 | C2 | S   | -0.02843 | -0.08173 | -0.08158 | 0.04291  | -0.09962 |
| 22 | C2 | S   | 0.05266  | 0.15673  | 0.15473  | -0.08095 | 0.19269  |
| 23 | C2 | PX  | 0.01858  | 0.05640  | 0.02697  | -0.01484 | 0.03094  |
| 24 | C2 | PY  | -0.02189 | 0.03667  | -0.00290 | -0.06621 | 0.02991  |
| 25 | C2 | PZ  | 0.00000  | 0.00000  | 0.00000  | 0.00000  | 0.00000  |
| 26 | C2 | S   | 0.03640  | 0.08409  | 0.12102  | -0.05828 | 0.12680  |
| 27 | C2 | PX  | 0.00244  | -0.00816 | 0.00794  | -0.00480 | -0.01208 |
| 28 | C2 | PY  | -0.01578 | 0.00280  | -0.00156 | -0.01531 | 0.00757  |
| 29 | C2 | PZ  | 0.00000  | 0.00000  | 0.00000  | 0.00000  | 0.00000  |
| 30 | C2 | DXX | -0.00008 | 0.00281  | 0.00094  | -0.00032 | 0.00260  |
| 31 | C2 | DYY | 0.00514  | 0.00528  | 0.00885  | -0.00168 | 0.00556  |
| 32 | C2 | DZZ | -0.00308 | -0.00648 | -0.00684 | 0.00312  | -0.00740 |
| 33 | C2 | DXY | -0.00249 | 0.00342  | 0.00015  | -0.00676 | 0.00133  |
| 34 | C2 | DXZ | 0.00000  | 0.00000  | 0.00000  | 0.00000  | 0.00000  |
| 35 | C2 | DYZ | 0.00000  | 0.00000  | 0.00000  | 0.00000  | 0.00000  |
| 36 | C3 | S   | -0.06210 | -0.06494 | 0.09229  | -0.08166 | -0.04395 |
| 37 | C3 | S   | 0.11552  | 0.12555  | -0.17551 | 0.15746  | 0.08500  |
| 38 | C3 | PX  | -0.03852 | 0.00348  | -0.05756 | -0.01045 | -0.02326 |
| 39 | C3 | PY  | -0.03599 | 0.05348  | 0.04817  | -0.02863 | -0.11117 |
| 40 | C3 | PZ  | 0.00000  | 0.00000  | 0.00000  | 0.00000  | 0.00000  |
| 41 | C3 | S   | 0.05414  | 0.06134  | -0.13372 | 0.10388  | 0.06914  |
| 42 | C3 | PX  | -0.01472 | 0.00884  | -0.00452 | 0.00197  | 0.00210  |
| 43 | C3 | PY  | 0.01019  | 0.01746  | 0.00622  | -0.00936 | -0.05975 |
| 44 | C3 | PZ  | 0.00000  | 0.00000  | 0.00000  | 0.00000  | 0.00000  |
| 45 | C3 | DXX | 0.00731  | 0.00241  | 0.00532  | 0.00486  | 0.00152  |
| 46 | C3 | DYY | 0.00450  | 0.00831  | -0.01490 | 0.00508  | 0.00000  |
| 47 | C3 | DZZ | -0.00592 | -0.00547 | 0.00695  | -0.00623 | -0.00269 |
| 48 | C3 | DXY | 0.00217  | 0.00232  | 0.00041  | 0.00068  | -0.00808 |
| 49 | C3 | DXZ | 0.00000  | 0.00000  | 0.00000  | 0.00000  | 0.00000  |
| 50 | C3 | DYZ | 0.00000  | 0.00000  | 0.00000  | 0.00000  | 0.00000  |
| 51 | C4 | S   | -0.01115 | -0.10899 | 0.01557  | 0.04274  | 0.10134  |
| 52 | C4 | S   | 0.02007  | 0.20724  | -0.03067 | -0.08134 | -0.19282 |
| 53 | C4 | PX  | -0.00247 | -0.01578 | -0.04421 | 0.04096  | -0.07867 |
| 54 | C4 | PY  | -0.01027 | -0.06254 | 0.02813  | -0.00849 | 0.05598  |
| 55 | C4 | PZ  | 0.00000  | 0.00000  | 0.00000  | 0.00000  | 0.00000  |
| 56 | C4 | S   | 0.03508  | 0.12516  | -0.00970 | -0.06477 | -0.17700 |
| 57 | C4 | PX  | -0.00476 | -0.00317 | -0.00784 | 0.00914  | -0.00326 |
| 58 | C4 | PY  | -0.00998 | -0.00379 | -0.00730 | 0.00430  | 0.01316  |
| 59 | C4 | PZ  | 0.00000  | 0.00000  | 0.00000  | 0.00000  | 0.00000  |
| 60 | C4 | DXX | 0.00103  | 0.00828  | 0.00440  | -0.00741 | 0.00129  |
| 61 | C4 | DYY | 0.00082  | 0.00483  | -0.00350 | 0.00115  | -0.00814 |
| 62 | C4 | DZZ | -0.00110 | -0.00940 | 0.00076  | 0.00398  | 0.00775  |
| 63 | C4 | DXY | -0.00036 | -0.00385 | 0.00367  | -0.00109 | 0.00799  |
| 64 | C4 | DXZ | 0.00000  | 0.00000  | 0.00000  | 0.00000  | 0.00000  |
| 65 | C4 | DYZ | 0.00000  | 0.00000  | 0.00000  | 0.00000  | 0.00000  |
| 66 | C5 | S   | -0.01295 | -0.10306 | -0.05186 | 0.07778  | -0.04746 |
| 67 | C5 | S   | 0.02730  | 0.19488  | 0.10120  | -0.14998 | 0.08939  |
| 68 | C5 | PX  | 0.00136  | 0.02733  | -0.03222 | -0.00091 | -0.09624 |
| 69 | C5 | PY  | -0.01364 | -0.05246 | -0.04201 | 0.02209  | -0.06857 |
| 70 | C5 | PZ  | 0.00000  | 0.00000  | 0.00000  | 0.00000  | 0.00000  |

|     |    |     |          |          |          |          |          |
|-----|----|-----|----------|----------|----------|----------|----------|
| 71  | C5 | S   | 0.00686  | 0.13990  | 0.05912  | -0.10381 | 0.09140  |
| 72  | C5 | PX  | -0.01354 | 0.01121  | -0.00713 | -0.00240 | -0.00568 |
| 73  | C5 | PY  | 0.00881  | -0.01635 | 0.00732  | -0.00225 | -0.01476 |
| 74  | C5 | PZ  | 0.00000  | 0.00000  | 0.00000  | 0.00000  | 0.00000  |
| 75  | C5 | DXX | 0.00040  | 0.00859  | -0.00148 | -0.00467 | -0.00830 |
| 76  | C5 | DYY | 0.00108  | 0.00445  | 0.00505  | -0.00322 | 0.00881  |
| 77  | C5 | DZZ | -0.00056 | -0.00942 | -0.00365 | 0.00642  | -0.00340 |
| 78  | C5 | DXY | 0.00067  | 0.00358  | 0.00388  | -0.00306 | 0.00611  |
| 79  | C5 | DXZ | 0.00000  | 0.00000  | 0.00000  | 0.00000  | 0.00000  |
| 80  | C5 | DYZ | 0.00000  | 0.00000  | 0.00000  | 0.00000  | 0.00000  |
| 81  | C6 | S   | -0.11142 | -0.02696 | -0.06497 | -0.04975 | -0.02426 |
| 82  | C6 | S   | 0.21497  | 0.05202  | 0.12958  | 0.09830  | 0.04650  |
| 83  | C6 | PX  | -0.00405 | 0.02770  | -0.10777 | 0.04491  | 0.03034  |
| 84  | C6 | PY  | -0.10745 | 0.09706  | -0.02603 | -0.04404 | 0.11721  |
| 85  | C6 | PZ  | 0.00000  | 0.00000  | 0.00000  | 0.00000  | 0.00000  |
| 86  | C6 | S   | 0.04237  | 0.05241  | 0.06301  | 0.06853  | 0.05741  |
| 87  | C6 | PX  | 0.01862  | 0.01628  | -0.00106 | 0.02695  | 0.00986  |
| 88  | C6 | PY  | 0.02472  | 0.02468  | 0.01534  | -0.00791 | 0.04176  |
| 89  | C6 | PZ  | 0.00000  | 0.00000  | 0.00000  | 0.00000  | 0.00000  |
| 90  | C6 | DXX | 0.00004  | 0.00770  | -0.00958 | 0.00803  | 0.00875  |
| 91  | C6 | DYY | 0.01759  | -0.00145 | 0.01448  | -0.00183 | -0.00199 |
| 92  | C6 | DZZ | -0.01220 | -0.00247 | -0.00617 | -0.00484 | -0.00181 |
| 93  | C6 | DXY | 0.00446  | -0.00517 | 0.00290  | 0.00358  | -0.01190 |
| 94  | C6 | DXZ | 0.00000  | 0.00000  | 0.00000  | 0.00000  | 0.00000  |
| 95  | C6 | DYZ | 0.00000  | 0.00000  | 0.00000  | 0.00000  | 0.00000  |
| 96  | C7 | S   | -0.05479 | -0.00837 | 0.11160  | -0.02793 | -0.08464 |
| 97  | C7 | S   | 0.10131  | 0.01407  | -0.21525 | 0.05265  | 0.16412  |
| 98  | C7 | PX  | -0.05311 | 0.01217  | 0.04029  | 0.00294  | -0.02446 |
| 99  | C7 | PY  | 0.01620  | 0.03771  | -0.03702 | 0.09495  | 0.03157  |
| 100 | C7 | PZ  | 0.00000  | 0.00000  | 0.00000  | 0.00000  | 0.00000  |
| 101 | C7 | S   | 0.06529  | 0.03244  | -0.13974 | 0.04620  | 0.08859  |
| 102 | C7 | PX  | -0.01327 | -0.01100 | -0.00470 | -0.00022 | 0.01487  |
| 103 | C7 | PY  | 0.01731  | 0.00261  | 0.00139  | 0.00839  | -0.01426 |
| 104 | C7 | PZ  | 0.00000  | 0.00000  | 0.00000  | 0.00000  | 0.00000  |
| 105 | C7 | DXX | 0.00568  | -0.00345 | -0.00326 | -0.00361 | 0.00222  |
| 106 | C7 | DYY | 0.00369  | 0.00243  | -0.00873 | 0.00351  | 0.00544  |
| 107 | C7 | DZZ | -0.00570 | -0.00052 | 0.00878  | -0.00198 | -0.00654 |
| 108 | C7 | DXY | 0.00036  | -0.00308 | -0.00003 | -0.00907 | -0.00348 |
| 109 | C7 | DXZ | 0.00000  | 0.00000  | 0.00000  | 0.00000  | 0.00000  |
| 110 | C7 | DYZ | 0.00000  | 0.00000  | 0.00000  | 0.00000  | 0.00000  |
| 111 | H3 | S   | 0.00307  | 0.04711  | -0.00758 | -0.02638 | -0.06569 |
| 112 | H3 | S   | 0.00169  | 0.00817  | 0.00171  | -0.00993 | -0.02078 |
| 113 | H3 | PX  | -0.00011 | -0.00211 | 0.00001  | 0.00139  | 0.00189  |
| 114 | H3 | PY  | -0.00025 | -0.00476 | 0.00105  | 0.00215  | 0.00631  |
| 115 | H3 | PZ  | 0.00000  | 0.00000  | 0.00000  | 0.00000  | 0.00000  |
| 116 | H4 | S   | 0.00301  | 0.04505  | 0.02704  | -0.04672 | 0.02899  |
| 117 | H4 | S   | -0.00654 | 0.01227  | 0.00189  | -0.01215 | 0.00982  |
| 118 | H4 | PX  | 0.00031  | 0.00241  | 0.00105  | -0.00223 | 0.00050  |
| 119 | H4 | PY  | -0.00027 | -0.00431 | -0.00274 | 0.00415  | -0.00327 |
| 120 | H4 | PZ  | 0.00000  | 0.00000  | 0.00000  | 0.00000  | 0.00000  |
| 121 | N1 | S   | -0.14422 | 0.05226  | -0.06921 | -0.00221 | 0.07083  |
| 122 | N1 | S   | 0.28540  | -0.10838 | 0.14253  | 0.00393  | -0.14880 |
| 123 | N1 | PX  | 0.10533  | -0.03781 | -0.00114 | -0.00205 | -0.02521 |
| 124 | N1 | PY  | 0.05565  | 0.01227  | 0.08376  | 0.08944  | -0.00065 |

|     |     |     |          |          |          |          |          |
|-----|-----|-----|----------|----------|----------|----------|----------|
| 125 | N1  | PZ  | 0.00000  | 0.00000  | 0.00000  | 0.00000  | 0.00000  |
| 126 | N1  | S   | 0.32801  | -0.10545 | 0.17242  | -0.00303 | -0.16263 |
| 127 | N1  | PX  | 0.06128  | -0.01864 | 0.00923  | -0.00751 | -0.01621 |
| 128 | N1  | PY  | 0.02279  | 0.01197  | 0.03252  | 0.03653  | 0.00455  |
| 129 | N1  | PZ  | 0.00000  | 0.00000  | 0.00000  | 0.00000  | 0.00000  |
| 130 | N1  | DXX | 0.00583  | -0.00405 | -0.00621 | -0.00293 | -0.00070 |
| 131 | N1  | DYY | 0.00608  | -0.00117 | 0.00607  | 0.00102  | -0.00195 |
| 132 | N1  | DZZ | -0.01353 | 0.00362  | -0.00332 | -0.00023 | 0.00361  |
| 133 | N1  | DXY | 0.00259  | 0.00279  | 0.00627  | 0.01155  | 0.00079  |
| 134 | N1  | DXZ | 0.00000  | 0.00000  | 0.00000  | 0.00000  | 0.00000  |
| 135 | N1  | DYZ | 0.00000  | 0.00000  | 0.00000  | 0.00000  | 0.00000  |
| 136 | H6  | S   | 0.01021  | 0.03125  | 0.04482  | -0.02299 | 0.05826  |
| 137 | H6  | S   | 0.00074  | -0.00106 | 0.01154  | -0.00736 | 0.01027  |
| 138 | H6  | PX  | 0.00132  | 0.00352  | 0.00476  | -0.00247 | 0.00581  |
| 139 | H6  | PY  | 0.00025  | 0.00044  | 0.00001  | -0.00071 | 0.00069  |
| 140 | H6  | PZ  | 0.00000  | 0.00000  | 0.00000  | 0.00000  | 0.00000  |
| 141 | C8  | S   | -0.08826 | 0.04637  | 0.06712  | 0.10125  | -0.00594 |
| 142 | C8  | S   | 0.16846  | -0.09040 | -0.13103 | -0.19849 | 0.00996  |
| 143 | C8  | PX  | -0.04358 | 0.03327  | -0.07860 | 0.02159  | 0.09741  |
| 144 | C8  | PY  | 0.06687  | -0.00300 | 0.03594  | 0.13992  | -0.00773 |
| 145 | C8  | PZ  | 0.00000  | 0.00000  | 0.00000  | 0.00000  | 0.00000  |
| 146 | C8  | S   | 0.04461  | -0.05447 | -0.09646 | -0.13342 | 0.02587  |
| 147 | C8  | PX  | 0.02993  | -0.01586 | -0.01592 | -0.01459 | 0.01350  |
| 148 | C8  | PY  | -0.00505 | -0.00122 | -0.01380 | 0.01365  | 0.01864  |
| 149 | C8  | PZ  | 0.00000  | 0.00000  | 0.00000  | 0.00000  | 0.00000  |
| 150 | C8  | DXX | 0.00795  | -0.00264 | -0.00047 | 0.00434  | -0.00079 |
| 151 | C8  | DYY | 0.01224  | -0.00436 | -0.00597 | -0.00822 | 0.00118  |
| 152 | C8  | DZZ | -0.00993 | 0.00440  | 0.00516  | 0.00721  | -0.00003 |
| 153 | C8  | DXY | -0.00910 | 0.00502  | -0.01305 | 0.00014  | 0.01304  |
| 154 | C8  | DXZ | 0.00000  | 0.00000  | 0.00000  | 0.00000  | 0.00000  |
| 155 | C8  | DYZ | 0.00000  | 0.00000  | 0.00000  | 0.00000  | 0.00000  |
| 156 | H8  | S   | 0.01512  | 0.00456  | -0.05839 | 0.00728  | 0.04888  |
| 157 | H8  | S   | 0.00498  | 0.00389  | -0.01031 | -0.00114 | 0.00734  |
| 158 | H8  | PX  | -0.00146 | -0.00042 | 0.00540  | -0.00036 | -0.00409 |
| 159 | H8  | PY  | 0.00025  | 0.00068  | -0.00225 | 0.00136  | 0.00195  |
| 160 | H8  | PZ  | 0.00000  | 0.00000  | 0.00000  | 0.00000  | 0.00000  |
| 161 | C10 | S   | -0.02546 | 0.02737  | 0.05883  | 0.13573  | -0.00705 |
| 162 | C10 | S   | 0.04820  | -0.05287 | -0.11293 | -0.26146 | 0.01321  |
| 163 | C10 | PX  | -0.00158 | 0.00198  | -0.01455 | -0.00419 | 0.01684  |
| 164 | C10 | PY  | 0.03175  | -0.02668 | -0.04463 | -0.08784 | 0.00185  |
| 165 | C10 | PZ  | 0.00000  | 0.00000  | 0.00000  | 0.00000  | 0.00000  |
| 166 | C10 | S   | 0.03321  | -0.03605 | -0.09138 | -0.20180 | 0.01996  |
| 167 | C10 | PX  | -0.01366 | 0.00630  | -0.00082 | 0.00029  | 0.00147  |
| 168 | C10 | PY  | 0.00650  | -0.00198 | -0.00588 | -0.00783 | 0.00323  |
| 169 | C10 | PZ  | 0.00000  | 0.00000  | 0.00000  | 0.00000  | 0.00000  |
| 170 | C10 | DXX | -0.00228 | 0.00136  | 0.00148  | 0.00274  | 0.00033  |
| 171 | C10 | DYY | 0.00304  | -0.00311 | -0.00511 | -0.01228 | -0.00007 |
| 172 | C10 | DZZ | -0.00191 | 0.00210  | 0.00480  | 0.01137  | -0.00057 |
| 173 | C10 | DXY | -0.00136 | 0.00059  | -0.00247 | -0.00090 | 0.00201  |
| 174 | C10 | DXZ | 0.00000  | 0.00000  | 0.00000  | 0.00000  | 0.00000  |
| 175 | C10 | DYZ | 0.00000  | 0.00000  | 0.00000  | 0.00000  | 0.00000  |
| 176 | H16 | S   | 0.00892  | -0.01196 | -0.03506 | -0.07744 | 0.01033  |
| 177 | H16 | S   | 0.00489  | -0.00319 | -0.00814 | -0.01848 | 0.00470  |
| 178 | H16 | PX  | -0.00071 | 0.00094  | 0.00296  | 0.00625  | -0.00080 |

|     |     |    |          |          |          |          |          |
|-----|-----|----|----------|----------|----------|----------|----------|
| 179 | H16 | PY | 0.00052  | -0.00092 | -0.00273 | -0.00551 | 0.00079  |
| 180 | H16 | PZ | 0.00000  | 0.00000  | 0.00000  | 0.00000  | 0.00000  |
| 181 | H18 | S  | 0.00944  | -0.01359 | -0.02685 | -0.07738 | -0.00159 |
| 182 | H18 | S  | -0.00397 | 0.00043  | -0.00219 | -0.01651 | -0.00259 |
| 183 | H18 | PX | 0.00136  | -0.00137 | -0.00241 | -0.00706 | -0.00014 |
| 184 | H18 | PY | 0.00078  | -0.00106 | -0.00146 | -0.00460 | -0.00037 |
| 185 | H18 | PZ | 0.00000  | 0.00000  | 0.00000  | 0.00000  | 0.00000  |

|              |           |           |           |           |           |
|--------------|-----------|-----------|-----------|-----------|-----------|
| MO:          | 16        | 17        | 18        | 19        | 20        |
| Eigenvalues: | -0.90918  | -0.80562  | -0.79464  | -0.75492  | -0.68891  |
| (ev):        | -24.74003 | -21.92213 | -21.62336 | -20.54253 | -18.74617 |

|    |    | A   | A        | A        | A        | A        |          |
|----|----|-----|----------|----------|----------|----------|----------|
| 1  | H1 | S   | -0.04160 | -0.12145 | 0.00323  | 0.05688  | -0.06736 |
| 2  | H1 | S   | -0.01017 | -0.05224 | 0.01110  | 0.03304  | -0.04468 |
| 3  | H1 | PX  | 0.00365  | 0.00918  | -0.00050 | -0.00351 | 0.00419  |
| 4  | H1 | PY  | 0.00081  | 0.00096  | 0.00218  | -0.00145 | -0.00167 |
| 5  | H1 | PZ  | 0.00000  | 0.00000  | 0.00000  | 0.00000  | 0.00000  |
| 6  | C1 | S   | 0.05775  | 0.08513  | 0.00938  | -0.01010 | -0.00133 |
| 7  | C1 | S   | -0.11573 | -0.17100 | -0.02332 | 0.02053  | 0.00611  |
| 8  | C1 | PX  | 0.00710  | -0.09298 | 0.01550  | 0.09237  | -0.11945 |
| 9  | C1 | PY  | 0.06789  | 0.02496  | 0.18373  | -0.06510 | -0.11735 |
| 10 | C1 | PZ  | 0.00000  | 0.00000  | 0.00000  | 0.00000  | 0.00000  |
| 11 | C1 | S   | -0.06845 | -0.14148 | 0.03355  | 0.02456  | -0.02407 |
| 12 | C1 | PX  | -0.01697 | -0.05352 | -0.02600 | 0.03131  | -0.03181 |
| 13 | C1 | PY  | 0.01212  | 0.00887  | 0.04166  | -0.01756 | -0.03582 |
| 14 | C1 | PZ  | 0.00000  | 0.00000  | 0.00000  | 0.00000  | 0.00000  |
| 15 | C1 | DXX | -0.00283 | -0.00463 | -0.00152 | 0.00037  | 0.00039  |
| 16 | C1 | DYY | -0.00327 | -0.00103 | -0.00223 | 0.00204  | 0.00091  |
| 17 | C1 | DZZ | 0.00460  | 0.00585  | 0.00089  | -0.00070 | 0.00012  |
| 18 | C1 | DXY | -0.00724 | -0.00092 | -0.01249 | 0.00262  | 0.00364  |
| 19 | C1 | DXZ | 0.00000  | 0.00000  | 0.00000  | 0.00000  | 0.00000  |
| 20 | C1 | DYZ | 0.00000  | 0.00000  | 0.00000  | 0.00000  | 0.00000  |
| 21 | C2 | S   | 0.04350  | 0.07420  | -0.03920 | 0.01662  | 0.03760  |
| 22 | C2 | S   | -0.08703 | -0.14631 | 0.08207  | -0.03424 | -0.07515 |
| 23 | C2 | PX  | -0.01126 | 0.08051  | -0.03454 | -0.07343 | 0.16026  |
| 24 | C2 | PY  | 0.12115  | -0.07770 | -0.16856 | 0.03158  | -0.04769 |
| 25 | C2 | PZ  | 0.00000  | 0.00000  | 0.00000  | 0.00000  | 0.00000  |
| 26 | C2 | S   | -0.06684 | -0.13397 | 0.04277  | -0.00450 | -0.07966 |
| 27 | C2 | PX  | 0.00491  | 0.03374  | -0.03445 | -0.00780 | 0.08162  |
| 28 | C2 | PY  | 0.02475  | -0.02157 | -0.03089 | 0.01386  | -0.00879 |
| 29 | C2 | PZ  | 0.00000  | 0.00000  | 0.00000  | 0.00000  | 0.00000  |
| 30 | C2 | DXX | -0.00357 | -0.00222 | 0.00403  | -0.00315 | -0.00534 |
| 31 | C2 | DYY | -0.00338 | -0.00042 | 0.00156  | 0.00319  | 0.00500  |
| 32 | C2 | DZZ | 0.00383  | 0.00475  | -0.00276 | 0.00129  | 0.00208  |
| 33 | C2 | DXY | 0.01108  | -0.00667 | -0.01027 | 0.00333  | -0.00130 |
| 34 | C2 | DXZ | 0.00000  | 0.00000  | 0.00000  | 0.00000  | 0.00000  |
| 35 | C2 | DYZ | 0.00000  | 0.00000  | 0.00000  | 0.00000  | 0.00000  |
| 36 | C3 | S   | 0.03808  | -0.03418 | 0.07748  | -0.00916 | 0.01713  |
| 37 | C3 | S   | -0.07750 | 0.06855  | -0.15457 | 0.01859  | -0.03461 |
| 38 | C3 | PX  | 0.03273  | -0.16396 | -0.01726 | 0.15777  | 0.06922  |
| 39 | C3 | PY  | -0.13504 | -0.05792 | -0.08410 | -0.06009 | 0.17632  |
| 40 | C3 | PZ  | 0.00000  | 0.00000  | 0.00000  | 0.00000  | 0.00000  |
| 41 | C3 | S   | -0.05057 | 0.04554  | -0.14254 | 0.03376  | 0.00087  |



|    |    |     |          |          |          |          |          |
|----|----|-----|----------|----------|----------|----------|----------|
| 42 | C3 | PX  | -0.00081 | -0.04004 | -0.00716 | 0.05432  | 0.01684  |
| 43 | C3 | PY  | -0.05841 | -0.02267 | -0.07335 | -0.02976 | 0.05808  |
| 44 | C3 | PZ  | 0.00000  | 0.00000  | 0.00000  | 0.00000  | 0.00000  |
| 45 | C3 | DXX | -0.00898 | 0.01101  | -0.00229 | -0.00553 | -0.00013 |
| 46 | C3 | DYY | 0.00177  | -0.00785 | -0.00301 | 0.00309  | 0.00094  |
| 47 | C3 | DZZ | 0.00292  | -0.00263 | 0.00521  | 0.00055  | 0.00122  |
| 48 | C3 | DXY | -0.00499 | -0.00448 | -0.00735 | -0.00217 | -0.00062 |
| 49 | C3 | DXZ | 0.00000  | 0.00000  | 0.00000  | 0.00000  | 0.00000  |
| 50 | C3 | DYZ | 0.00000  | 0.00000  | 0.00000  | 0.00000  | 0.00000  |
| 51 | C4 | S   | -0.06019 | -0.05636 | -0.06729 | 0.01110  | 0.01646  |
| 52 | C4 | S   | 0.11904  | 0.11326  | 0.13538  | -0.02204 | -0.03331 |
| 53 | C4 | PX  | -0.08377 | -0.10407 | 0.11259  | -0.02642 | -0.17111 |
| 54 | C4 | PY  | 0.06968  | 0.08345  | 0.02454  | 0.07067  | -0.11192 |
| 55 | C4 | PZ  | 0.00000  | 0.00000  | 0.00000  | 0.00000  | 0.00000  |
| 56 | C4 | S   | 0.08897  | 0.09334  | 0.09205  | -0.01122 | -0.02255 |
| 57 | C4 | PX  | -0.01544 | -0.02359 | 0.04149  | -0.00810 | -0.06591 |
| 58 | C4 | PY  | 0.02639  | 0.04149  | 0.04615  | 0.01376  | -0.06440 |
| 59 | C4 | PZ  | 0.00000  | 0.00000  | 0.00000  | 0.00000  | 0.00000  |
| 60 | C4 | DXX | 0.01100  | 0.00615  | -0.00428 | 0.00359  | 0.00610  |
| 61 | C4 | DYY | -0.00325 | -0.00052 | 0.00496  | -0.00228 | -0.00487 |
| 62 | C4 | DZZ | -0.00498 | -0.00450 | -0.00405 | 0.00075  | 0.00079  |
| 63 | C4 | DXY | 0.00355  | 0.00618  | -0.00086 | 0.00038  | -0.00026 |
| 64 | C4 | DXZ | 0.00000  | 0.00000  | 0.00000  | 0.00000  | 0.00000  |
| 65 | C4 | DYZ | 0.00000  | 0.00000  | 0.00000  | 0.00000  | 0.00000  |
| 66 | C5 | S   | -0.08796 | -0.01045 | 0.07223  | -0.03450 | -0.02427 |
| 67 | C5 | S   | 0.17246  | 0.02146  | -0.14566 | 0.07086  | 0.05172  |
| 68 | C5 | PX  | 0.04460  | 0.15524  | 0.06255  | -0.03717 | 0.13116  |
| 69 | C5 | PY  | 0.06428  | 0.08617  | -0.02383 | 0.10429  | -0.03240 |
| 70 | C5 | PZ  | 0.00000  | 0.00000  | 0.00000  | 0.00000  | 0.00000  |
| 71 | C5 | S   | 0.15077  | 0.02723  | -0.11528 | 0.05742  | 0.02725  |
| 72 | C5 | PX  | 0.01072  | 0.04103  | 0.03473  | -0.01619 | 0.03684  |
| 73 | C5 | PY  | 0.02056  | 0.01847  | -0.03962 | 0.05438  | 0.00374  |
| 74 | C5 | PZ  | 0.00000  | 0.00000  | 0.00000  | 0.00000  | 0.00000  |
| 75 | C5 | DXX | 0.01002  | 0.00931  | 0.00244  | 0.00112  | 0.00310  |
| 76 | C5 | DYY | -0.00091 | -0.00463 | -0.00447 | 0.00081  | -0.00141 |
| 77 | C5 | DZZ | -0.00729 | -0.00158 | 0.00490  | -0.00215 | -0.00145 |
| 78 | C5 | DXY | -0.00050 | -0.00522 | 0.00204  | -0.00245 | -0.00471 |
| 79 | C5 | DXZ | 0.00000  | 0.00000  | 0.00000  | 0.00000  | 0.00000  |
| 80 | C5 | DYZ | 0.00000  | 0.00000  | 0.00000  | 0.00000  | 0.00000  |
| 81 | C6 | S   | 0.07157  | -0.07266 | -0.04705 | 0.00784  | -0.01064 |
| 82 | C6 | S   | -0.14644 | 0.14981  | 0.09828  | -0.01466 | 0.02337  |
| 83 | C6 | PX  | 0.01391  | 0.11485  | -0.15118 | -0.13225 | -0.09436 |
| 84 | C6 | PY  | -0.10589 | -0.01234 | 0.04628  | -0.16102 | 0.03599  |
| 85 | C6 | PZ  | 0.00000  | 0.00000  | 0.00000  | 0.00000  | 0.00000  |
| 86 | C6 | S   | -0.12706 | 0.13253  | 0.10678  | -0.02242 | 0.00900  |
| 87 | C6 | PX  | -0.00951 | 0.04892  | -0.04696 | -0.03250 | -0.04201 |
| 88 | C6 | PY  | -0.03098 | -0.00265 | 0.03807  | -0.05677 | 0.01374  |
| 89 | C6 | PZ  | 0.00000  | 0.00000  | 0.00000  | 0.00000  | 0.00000  |
| 90 | C6 | DXX | -0.00705 | 0.01075  | -0.00445 | -0.00643 | -0.00827 |
| 91 | C6 | DYY | 0.00048  | -0.00623 | 0.00502  | 0.00169  | 0.00423  |
| 92 | C6 | DZZ | 0.00497  | -0.00536 | -0.00334 | -0.00044 | -0.00040 |
| 93 | C6 | DXY | 0.00139  | 0.00345  | -0.00612 | 0.01257  | 0.01106  |
| 94 | C6 | DXZ | 0.00000  | 0.00000  | 0.00000  | 0.00000  | 0.00000  |
| 95 | C6 | DYZ | 0.00000  | 0.00000  | 0.00000  | 0.00000  | 0.00000  |

|     |    |     |          |          |          |          |          |
|-----|----|-----|----------|----------|----------|----------|----------|
| 96  | C7 | S   | -0.07287 | 0.02533  | -0.07196 | -0.03984 | -0.02519 |
| 97  | C7 | S   | 0.14539  | -0.05308 | 0.14459  | 0.08058  | 0.05014  |
| 98  | C7 | PX  | -0.03317 | -0.04423 | 0.03498  | 0.15496  | 0.20404  |
| 99  | C7 | PY  | -0.01619 | 0.05328  | -0.12489 | 0.09959  | -0.14194 |
| 100 | C7 | PZ  | 0.00000  | 0.00000  | 0.00000  | 0.00000  | 0.00000  |
| 101 | C7 | S   | 0.08401  | -0.04537 | 0.10262  | 0.06671  | 0.06998  |
| 102 | C7 | PX  | 0.01642  | -0.01871 | 0.03777  | 0.06366  | 0.08637  |
| 103 | C7 | PY  | -0.01213 | 0.01143  | -0.05470 | 0.00905  | -0.05467 |
| 104 | C7 | PZ  | 0.00000  | 0.00000  | 0.00000  | 0.00000  | 0.00000  |
| 105 | C7 | DXX | 0.00753  | -0.00341 | 0.00915  | -0.00603 | 0.00603  |
| 106 | C7 | DYY | -0.00034 | 0.00131  | -0.00355 | 0.00415  | -0.00466 |
| 107 | C7 | DZZ | -0.00563 | 0.00146  | -0.00508 | -0.00174 | -0.00142 |
| 108 | C7 | DXY | 0.00041  | -0.00634 | 0.00288  | -0.01012 | 0.00114  |
| 109 | C7 | DXZ | 0.00000  | 0.00000  | 0.00000  | 0.00000  | 0.00000  |
| 110 | C7 | DYZ | 0.00000  | 0.00000  | 0.00000  | 0.00000  | 0.00000  |
| 111 | H3 | S   | 0.06002  | 0.06581  | 0.09444  | 0.01757  | -0.11496 |
| 112 | H3 | S   | 0.02149  | 0.02696  | 0.03606  | 0.01339  | -0.06681 |
| 113 | H3 | PX  | -0.00310 | -0.00352 | -0.00205 | -0.00100 | 0.00177  |
| 114 | H3 | PY  | -0.00404 | -0.00379 | -0.00729 | -0.00026 | 0.00696  |
| 115 | H3 | PZ  | 0.00000  | 0.00000  | 0.00000  | 0.00000  | 0.00000  |
| 116 | H4 | S   | 0.08449  | 0.00901  | -0.08978 | 0.08953  | -0.02741 |
| 117 | H4 | S   | 0.03200  | 0.00588  | -0.03307 | 0.04377  | -0.02477 |
| 118 | H4 | PX  | 0.00422  | 0.00212  | -0.00314 | 0.00316  | 0.00035  |
| 119 | H4 | PY  | -0.00588 | 0.00081  | 0.00642  | -0.00505 | 0.00183  |
| 120 | H4 | PZ  | 0.00000  | 0.00000  | 0.00000  | 0.00000  | 0.00000  |
| 121 | N1 | S   | -0.02368 | 0.03648  | 0.02404  | -0.04288 | -0.03197 |
| 122 | N1 | S   | 0.05000  | -0.07984 | -0.05061 | 0.09645  | 0.07032  |
| 123 | N1 | PX  | 0.05352  | -0.00064 | -0.05283 | -0.08713 | -0.08173 |
| 124 | N1 | PY  | -0.04912 | 0.10794  | 0.12745  | 0.16277  | 0.02407  |
| 125 | N1 | PZ  | 0.00000  | 0.00000  | 0.00000  | 0.00000  | 0.00000  |
| 126 | N1 | S   | 0.05351  | -0.10848 | -0.07332 | 0.09284  | 0.10369  |
| 127 | N1 | PX  | 0.02230  | -0.00620 | -0.02380 | -0.05139 | -0.04127 |
| 128 | N1 | PY  | -0.02575 | 0.05482  | 0.04624  | 0.06420  | 0.00851  |
| 129 | N1 | PZ  | 0.00000  | 0.00000  | 0.00000  | 0.00000  | 0.00000  |
| 130 | N1 | DXX | 0.00840  | -0.00295 | -0.00709 | -0.01352 | -0.01005 |
| 131 | N1 | DYY | -0.00540 | 0.00274  | 0.00606  | 0.00884  | 0.00517  |
| 132 | N1 | DZZ | -0.00249 | 0.00054  | 0.00186  | 0.00131  | 0.00175  |
| 133 | N1 | DXY | -0.00376 | 0.01334  | 0.00720  | 0.01260  | -0.00146 |
| 134 | N1 | DXZ | 0.00000  | 0.00000  | 0.00000  | 0.00000  | 0.00000  |
| 135 | N1 | DYZ | 0.00000  | 0.00000  | 0.00000  | 0.00000  | 0.00000  |
| 136 | H6 | S   | -0.03166 | -0.10256 | 0.05580  | 0.02188  | -0.12510 |
| 137 | H6 | S   | -0.00820 | -0.04558 | 0.01919  | 0.01775  | -0.06567 |
| 138 | H6 | PX  | -0.00277 | -0.00812 | 0.00401  | 0.00126  | -0.00776 |
| 139 | H6 | PY  | 0.00120  | -0.00147 | -0.00220 | -0.00012 | -0.00168 |
| 140 | H6 | PZ  | 0.00000  | 0.00000  | 0.00000  | 0.00000  | 0.00000  |
| 141 | C8 | S   | -0.02072 | 0.04113  | -0.00115 | 0.09331  | -0.00193 |
| 142 | C8 | S   | 0.04332  | -0.08510 | 0.00053  | -0.19212 | 0.00295  |
| 143 | C8 | PX  | 0.02338  | 0.03998  | 0.16493  | -0.00140 | 0.01329  |
| 144 | C8 | PY  | 0.15596  | -0.04921 | -0.00631 | -0.03376 | -0.08864 |
| 145 | C8 | PZ  | 0.00000  | 0.00000  | 0.00000  | 0.00000  | 0.00000  |
| 146 | C8 | S   | 0.03849  | -0.06912 | 0.01776  | -0.16223 | 0.00794  |
| 147 | C8 | PX  | 0.02304  | -0.00655 | 0.04675  | -0.01709 | 0.00158  |
| 148 | C8 | PY  | 0.04305  | -0.01924 | 0.01621  | -0.01318 | -0.02109 |
| 149 | C8 | PZ  | 0.00000  | 0.00000  | 0.00000  | 0.00000  | 0.00000  |

|     |     |     |          |          |          |          |          |
|-----|-----|-----|----------|----------|----------|----------|----------|
| 150 | C8  | DXX | 0.01268  | -0.01001 | 0.00126  | -0.00281 | 0.00351  |
| 151 | C8  | DYY | -0.00375 | 0.00664  | -0.00150 | -0.00012 | -0.00750 |
| 152 | C8  | DZZ | -0.00307 | 0.00344  | 0.00102  | 0.00683  | 0.00063  |
| 153 | C8  | DXY | 0.00045  | 0.00398  | 0.01079  | -0.00139 | -0.00295 |
| 154 | C8  | DXZ | 0.00000  | 0.00000  | 0.00000  | 0.00000  | 0.00000  |
| 155 | C8  | DYZ | 0.00000  | 0.00000  | 0.00000  | 0.00000  | 0.00000  |
| 156 | H8  | S   | 0.04832  | -0.05290 | 0.10594  | 0.09624  | 0.16300  |
| 157 | H8  | S   | 0.01033  | -0.02615 | 0.04537  | 0.04826  | 0.09888  |
| 158 | H8  | PX  | -0.00383 | 0.00398  | -0.00761 | -0.00590 | -0.00987 |
| 159 | H8  | PY  | 0.00118  | -0.00125 | 0.00149  | 0.00447  | 0.00259  |
| 160 | H8  | PZ  | 0.00000  | 0.00000  | 0.00000  | 0.00000  | 0.00000  |
| 161 | C10 | S   | 0.09445  | -0.05475 | 0.00771  | -0.05990 | 0.01537  |
| 162 | C10 | S   | -0.18396 | 0.10722  | -0.01637 | 0.11823  | -0.03042 |
| 163 | C10 | PX  | 0.00340  | 0.01052  | 0.06352  | -0.00340 | 0.03452  |
| 164 | C10 | PY  | 0.00500  | -0.07564 | 0.00299  | -0.17732 | 0.08893  |
| 165 | C10 | PZ  | 0.00000  | 0.00000  | 0.00000  | 0.00000  | 0.00000  |
| 166 | C10 | S   | -0.15079 | 0.10223  | -0.00658 | 0.12502  | -0.04243 |
| 167 | C10 | PX  | -0.00814 | 0.00847  | 0.01621  | 0.00271  | 0.01467  |
| 168 | C10 | PY  | 0.01177  | -0.02760 | 0.00735  | -0.05955 | 0.03432  |
| 169 | C10 | PZ  | 0.00000  | 0.00000  | 0.00000  | 0.00000  | 0.00000  |
| 170 | C10 | DXX | -0.00286 | 0.00636  | -0.00019 | 0.01307  | -0.00573 |
| 171 | C10 | DYY | -0.00393 | -0.00262 | -0.00012 | -0.00695 | 0.00472  |
| 172 | C10 | DZZ | 0.00814  | -0.00475 | 0.00059  | -0.00538 | 0.00131  |
| 173 | C10 | DXY | 0.00015  | -0.00031 | 0.00145  | -0.00229 | -0.00004 |
| 174 | C10 | DXZ | 0.00000  | 0.00000  | 0.00000  | 0.00000  | 0.00000  |
| 175 | C10 | DYZ | 0.00000  | 0.00000  | 0.00000  | 0.00000  | 0.00000  |
| 176 | H16 | S   | -0.07487 | 0.07389  | 0.01869  | 0.11048  | -0.02693 |
| 177 | H16 | S   | -0.02463 | 0.03526  | 0.01412  | 0.06284  | -0.01429 |
| 178 | H16 | PX  | 0.00557  | -0.00493 | -0.00053 | -0.00676 | 0.00223  |
| 179 | H16 | PY  | -0.00403 | 0.00266  | 0.00123  | 0.00288  | 0.00044  |
| 180 | H16 | PZ  | 0.00000  | 0.00000  | 0.00000  | 0.00000  | 0.00000  |
| 181 | H18 | S   | -0.07680 | 0.06022  | -0.03548 | 0.10033  | -0.05492 |
| 182 | H18 | S   | -0.03074 | 0.02962  | -0.01838 | 0.05674  | -0.03035 |
| 183 | H18 | PX  | -0.00638 | 0.00472  | -0.00203 | 0.00711  | -0.00325 |
| 184 | H18 | PY  | -0.00317 | 0.00098  | -0.00161 | 0.00122  | -0.00025 |
| 185 | H18 | PZ  | 0.00000  | 0.00000  | 0.00000  | 0.00000  | 0.00000  |

|              |           |           |           |           |           |
|--------------|-----------|-----------|-----------|-----------|-----------|
| MO:          | 21        | 22        | 23        | 24        | 25        |
| Eigenvalues: | -0.67123  | -0.65389  | -0.61355  | -0.58253  | -0.56450  |
| (ev):        | -18.26519 | -17.79316 | -16.69552 | -15.85157 | -15.36080 |

|    |    |    |          |          |          |          |          |
|----|----|----|----------|----------|----------|----------|----------|
|    |    | A  | A        | A        | A        | A        |          |
| 1  | H1 | S  | 0.09914  | -0.06272 | 0.19193  | 0.05053  | 0.02053  |
| 2  | H1 | S  | 0.05294  | -0.04437 | 0.13799  | 0.04307  | 0.02247  |
| 3  | H1 | PX | -0.00609 | 0.00284  | -0.00983 | -0.00190 | -0.00053 |
| 4  | H1 | PY | 0.00017  | 0.00277  | -0.00023 | -0.00240 | -0.00197 |
| 5  | H1 | PZ | 0.00000  | 0.00000  | 0.00000  | 0.00000  | 0.00000  |
| 6  | C1 | S  | -0.04593 | -0.00460 | -0.00298 | 0.01268  | -0.00418 |
| 7  | C1 | S  | 0.09435  | 0.00913  | 0.00366  | -0.02752 | 0.00648  |
| 8  | C1 | PX | 0.08584  | -0.12195 | 0.29704  | 0.10707  | 0.02828  |
| 9  | C1 | PY | 0.02406  | 0.16915  | 0.04593  | -0.13632 | -0.14112 |
| 10 | C1 | PZ | 0.00000  | 0.00000  | 0.00000  | 0.00000  | 0.00000  |
| 11 | C1 | S  | 0.06670  | 0.00498  | 0.00700  | -0.01337 | 0.03634  |
| 12 | C1 | PX | 0.06892  | -0.04625 | 0.14247  | 0.03288  | 0.00042  |

|    |    |     |          |          |          |          |          |
|----|----|-----|----------|----------|----------|----------|----------|
| 13 | C1 | PY  | 0.00665  | 0.04849  | 0.01160  | -0.04246 | -0.05948 |
| 14 | C1 | PZ  | 0.00000  | 0.00000  | 0.00000  | 0.00000  | 0.00000  |
| 15 | C1 | DXX | 0.00875  | -0.00211 | 0.01300  | 0.00292  | 0.00317  |
| 16 | C1 | DYY | -0.00862 | -0.00135 | -0.01177 | 0.00011  | -0.00041 |
| 17 | C1 | DZZ | -0.00273 | 0.00015  | -0.00102 | 0.00000  | -0.00091 |
| 18 | C1 | DXY | 0.00058  | -0.01262 | 0.00034  | 0.00393  | 0.01200  |
| 19 | C1 | DXZ | 0.00000  | 0.00000  | 0.00000  | 0.00000  | 0.00000  |
| 20 | C1 | DYZ | 0.00000  | 0.00000  | 0.00000  | 0.00000  | 0.00000  |
| 21 | C2 | S   | 0.03518  | -0.01448 | 0.00771  | -0.02183 | -0.00793 |
| 22 | C2 | S   | -0.07343 | 0.02996  | -0.01461 | 0.04702  | 0.01310  |
| 23 | C2 | PX  | 0.04273  | 0.07812  | 0.29080  | 0.07795  | -0.04459 |
| 24 | C2 | PY  | 0.08906  | 0.17501  | 0.00365  | -0.01006 | -0.12356 |
| 25 | C2 | PZ  | 0.00000  | 0.00000  | 0.00000  | 0.00000  | 0.00000  |
| 26 | C2 | S   | -0.04112 | -0.00050 | -0.01376 | 0.02979  | 0.04300  |
| 27 | C2 | PX  | 0.04679  | 0.00926  | 0.14261  | 0.01060  | -0.00939 |
| 28 | C2 | PY  | 0.02599  | 0.04099  | -0.00350 | -0.01148 | -0.04503 |
| 29 | C2 | PZ  | 0.00000  | 0.00000  | 0.00000  | 0.00000  | 0.00000  |
| 30 | C2 | DXX | -0.00721 | -0.00126 | -0.01172 | 0.00163  | 0.00530  |
| 31 | C2 | DYY | 0.00550  | -0.00222 | 0.01042  | -0.00217 | -0.00375 |
| 32 | C2 | DZZ | 0.00196  | -0.00033 | 0.00107  | -0.00047 | -0.00127 |
| 33 | C2 | DXY | 0.00335  | 0.01291  | -0.00232 | 0.00530  | -0.01005 |
| 34 | C2 | DXZ | 0.00000  | 0.00000  | 0.00000  | 0.00000  | 0.00000  |
| 35 | C2 | DYZ | 0.00000  | 0.00000  | 0.00000  | 0.00000  | 0.00000  |
| 36 | C3 | S   | 0.03549  | 0.02848  | 0.03357  | -0.01322 | 0.01301  |
| 37 | C3 | S   | -0.07232 | -0.05906 | -0.06912 | 0.02869  | -0.02733 |
| 38 | C3 | PX  | -0.09585 | -0.03096 | -0.05484 | 0.16789  | -0.07960 |
| 39 | C3 | PY  | 0.07678  | -0.07000 | -0.09928 | -0.06001 | 0.22369  |
| 40 | C3 | PZ  | 0.00000  | 0.00000  | 0.00000  | 0.00000  | 0.00000  |
| 41 | C3 | S   | -0.07230 | -0.08014 | -0.06293 | -0.00912 | -0.02721 |
| 42 | C3 | PX  | -0.03340 | -0.01543 | -0.03904 | 0.09099  | -0.04637 |
| 43 | C3 | PY  | 0.04376  | -0.03315 | -0.03295 | -0.00706 | 0.06729  |
| 44 | C3 | PZ  | 0.00000  | 0.00000  | 0.00000  | 0.00000  | 0.00000  |
| 45 | C3 | DXX | 0.00591  | -0.00516 | 0.00990  | -0.01080 | 0.00886  |
| 46 | C3 | DYY | -0.00265 | 0.00453  | -0.01144 | 0.00632  | -0.00602 |
| 47 | C3 | DZZ | 0.00100  | 0.00099  | 0.00134  | -0.00017 | -0.00024 |
| 48 | C3 | DXY | 0.01209  | -0.00395 | -0.00441 | 0.00121  | 0.00712  |
| 49 | C3 | DXZ | 0.00000  | 0.00000  | 0.00000  | 0.00000  | 0.00000  |
| 50 | C3 | DYZ | 0.00000  | 0.00000  | 0.00000  | 0.00000  | 0.00000  |
| 51 | C4 | S   | 0.04335  | -0.00936 | 0.02374  | -0.00910 | 0.01176  |
| 52 | C4 | S   | -0.09009 | 0.01980  | -0.05002 | 0.02044  | -0.02583 |
| 53 | C4 | PX  | 0.01619  | 0.05530  | 0.01180  | -0.15378 | -0.02969 |
| 54 | C4 | PY  | -0.09009 | -0.22369 | 0.10907  | 0.11449  | 0.13738  |
| 55 | C4 | PZ  | 0.00000  | 0.00000  | 0.00000  | 0.00000  | 0.00000  |
| 56 | C4 | S   | -0.06172 | 0.00155  | -0.02427 | 0.01708  | -0.02264 |
| 57 | C4 | PX  | -0.00996 | 0.01677  | 0.00338  | -0.05083 | -0.00876 |
| 58 | C4 | PY  | -0.07238 | -0.07695 | 0.01919  | 0.05802  | 0.05812  |
| 59 | C4 | PZ  | 0.00000  | 0.00000  | 0.00000  | 0.00000  | 0.00000  |
| 60 | C4 | DXX | 0.00283  | -0.00225 | 0.00791  | 0.00816  | -0.00182 |
| 61 | C4 | DYY | -0.00428 | -0.00080 | -0.00620 | -0.00467 | 0.00336  |
| 62 | C4 | DZZ | 0.00256  | 0.00014  | 0.00081  | -0.00050 | -0.00022 |
| 63 | C4 | DXY | -0.00834 | -0.00520 | 0.00508  | 0.01218  | 0.00431  |
| 64 | C4 | DXZ | 0.00000  | 0.00000  | 0.00000  | 0.00000  | 0.00000  |
| 65 | C4 | DYZ | 0.00000  | 0.00000  | 0.00000  | 0.00000  | 0.00000  |
| 66 | C5 | S   | -0.03934 | 0.00015  | -0.02265 | -0.00101 | 0.01635  |

|     |    |     |          |          |          |          |          |
|-----|----|-----|----------|----------|----------|----------|----------|
| 67  | C5 | S   | 0.08164  | -0.00133 | 0.04728  | 0.00323  | -0.03466 |
| 68  | C5 | PX  | -0.10343 | -0.02773 | -0.01842 | 0.17112  | 0.02088  |
| 69  | C5 | PY  | 0.05472  | -0.24525 | -0.09786 | -0.16425 | 0.12537  |
| 70  | C5 | PZ  | 0.00000  | 0.00000  | 0.00000  | 0.00000  | 0.00000  |
| 71  | C5 | S   | 0.05317  | 0.00766  | 0.02798  | 0.01805  | -0.03963 |
| 72  | C5 | PX  | -0.05362 | -0.00346 | -0.01269 | 0.08014  | 0.00637  |
| 73  | C5 | PY  | 0.05942  | -0.10888 | -0.01504 | -0.09244 | 0.05357  |
| 74  | C5 | PZ  | 0.00000  | 0.00000  | 0.00000  | 0.00000  | 0.00000  |
| 75  | C5 | DXX | -0.00591 | -0.00138 | -0.01018 | 0.00576  | -0.00041 |
| 76  | C5 | DYY | 0.00530  | -0.00166 | 0.00815  | -0.00652 | 0.00159  |
| 77  | C5 | DZZ | -0.00223 | 0.00049  | -0.00093 | 0.00054  | 0.00021  |
| 78  | C5 | DXY | -0.00624 | 0.00720  | 0.00383  | 0.01226  | -0.00304 |
| 79  | C5 | DXZ | 0.00000  | 0.00000  | 0.00000  | 0.00000  | 0.00000  |
| 80  | C5 | DYZ | 0.00000  | 0.00000  | 0.00000  | 0.00000  | 0.00000  |
| 81  | C6 | S   | -0.03316 | 0.03487  | -0.03637 | 0.03747  | 0.00118  |
| 82  | C6 | S   | 0.07362  | -0.07564 | 0.07738  | -0.08314 | -0.00565 |
| 83  | C6 | PX  | 0.03259  | 0.04865  | 0.01585  | -0.11372 | 0.08778  |
| 84  | C6 | PY  | -0.14090 | -0.06554 | 0.11083  | 0.04023  | 0.17581  |
| 85  | C6 | PZ  | 0.00000  | 0.00000  | 0.00000  | 0.00000  | 0.00000  |
| 86  | C6 | S   | 0.03556  | -0.09038 | 0.06001  | -0.06146 | -0.00679 |
| 87  | C6 | PX  | 0.02366  | 0.02782  | -0.00086 | -0.03298 | 0.03365  |
| 88  | C6 | PY  | -0.05442 | -0.01280 | 0.02745  | 0.01235  | 0.06165  |
| 89  | C6 | PZ  | 0.00000  | 0.00000  | 0.00000  | 0.00000  | 0.00000  |
| 90  | C6 | DXX | -0.00306 | -0.00569 | -0.00535 | -0.00638 | 0.00251  |
| 91  | C6 | DYY | 0.00186  | 0.00678  | 0.00699  | 0.00759  | 0.00046  |
| 92  | C6 | DZZ | -0.00321 | 0.00095  | -0.00106 | 0.00152  | 0.00104  |
| 93  | C6 | DXY | 0.00945  | 0.00067  | -0.00679 | -0.00480 | -0.01032 |
| 94  | C6 | DXZ | 0.00000  | 0.00000  | 0.00000  | 0.00000  | 0.00000  |
| 95  | C6 | DYZ | 0.00000  | 0.00000  | 0.00000  | 0.00000  | 0.00000  |
| 96  | C7 | S   | 0.01874  | -0.02671 | -0.01122 | 0.01068  | 0.00461  |
| 97  | C7 | S   | -0.03881 | 0.05337  | 0.02313  | -0.02043 | -0.01100 |
| 98  | C7 | PX  | -0.11690 | -0.00234 | 0.03775  | -0.12838 | 0.05266  |
| 99  | C7 | PY  | -0.17279 | -0.00649 | 0.00412  | 0.12769  | -0.22707 |
| 100 | C7 | PZ  | 0.00000  | 0.00000  | 0.00000  | 0.00000  | 0.00000  |
| 101 | C7 | S   | -0.01352 | 0.06399  | 0.01404  | -0.00795 | 0.01358  |
| 102 | C7 | PX  | -0.06256 | -0.00190 | 0.03152  | -0.08128 | 0.02098  |
| 103 | C7 | PY  | -0.05313 | -0.00477 | 0.00813  | 0.05116  | -0.08427 |
| 104 | C7 | PZ  | 0.00000  | 0.00000  | 0.00000  | 0.00000  | 0.00000  |
| 105 | C7 | DXX | 0.00722  | 0.00570  | 0.00295  | -0.01004 | 0.01675  |
| 106 | C7 | DYY | -0.00406 | -0.00526 | -0.00221 | 0.00930  | -0.01384 |
| 107 | C7 | DZZ | 0.00015  | -0.00194 | -0.00080 | 0.00094  | -0.00067 |
| 108 | C7 | DXY | 0.01158  | -0.00397 | -0.00504 | 0.00682  | 0.00392  |
| 109 | C7 | DXZ | 0.00000  | 0.00000  | 0.00000  | 0.00000  | 0.00000  |
| 110 | C7 | DYZ | 0.00000  | 0.00000  | 0.00000  | 0.00000  | 0.00000  |
| 111 | H3 | S   | -0.08933 | -0.09744 | 0.03752  | 0.03677  | 0.06181  |
| 112 | H3 | S   | -0.04488 | -0.07110 | 0.03676  | 0.02372  | 0.05361  |
| 113 | H3 | PX  | 0.00299  | 0.00420  | -0.00097 | -0.00290 | -0.00253 |
| 114 | H3 | PY  | 0.00454  | 0.00321  | -0.00130 | -0.00014 | -0.00165 |
| 115 | H3 | PZ  | 0.00000  | 0.00000  | 0.00000  | 0.00000  | 0.00000  |
| 116 | H4 | S   | 0.09844  | -0.11972 | -0.02145 | -0.14894 | 0.04695  |
| 117 | H4 | S   | 0.05095  | -0.07927 | -0.02484 | -0.11161 | 0.04145  |
| 118 | H4 | PX  | 0.00235  | -0.00507 | -0.00092 | -0.00279 | 0.00223  |
| 119 | H4 | PY  | -0.00579 | 0.00403  | 0.00024  | 0.00664  | -0.00086 |
| 120 | H4 | PZ  | 0.00000  | 0.00000  | 0.00000  | 0.00000  | 0.00000  |

|     |     |     |          |          |          |          |          |
|-----|-----|-----|----------|----------|----------|----------|----------|
| 121 | N1  | S   | 0.02667  | -0.01707 | 0.01178  | -0.02490 | -0.00247 |
| 122 | N1  | S   | -0.06010 | 0.03454  | -0.02655 | 0.05571  | 0.00333  |
| 123 | N1  | PX  | 0.05150  | 0.05837  | 0.02204  | -0.03491 | 0.10959  |
| 124 | N1  | PY  | 0.20152  | -0.03140 | -0.04329 | -0.05757 | -0.22395 |
| 125 | N1  | PZ  | 0.00000  | 0.00000  | 0.00000  | 0.00000  | 0.00000  |
| 126 | N1  | S   | -0.10040 | 0.06772  | -0.03141 | 0.08120  | 0.03874  |
| 127 | N1  | PX  | 0.02851  | 0.03286  | 0.01658  | -0.02270 | 0.06800  |
| 128 | N1  | PY  | 0.09581  | -0.00855 | -0.02060 | -0.03055 | -0.10591 |
| 129 | N1  | PZ  | 0.00000  | 0.00000  | 0.00000  | 0.00000  | 0.00000  |
| 130 | N1  | DXX | 0.00158  | 0.00654  | 0.00157  | -0.00095 | 0.01530  |
| 131 | N1  | DYY | 0.00137  | -0.00766 | -0.00049 | -0.00245 | -0.01468 |
| 132 | N1  | DZZ | -0.00200 | -0.00234 | -0.00009 | 0.00082  | -0.00180 |
| 133 | N1  | DXY | 0.01778  | 0.00076  | -0.00306 | -0.00794 | -0.01428 |
| 134 | N1  | DXZ | 0.00000  | 0.00000  | 0.00000  | 0.00000  | 0.00000  |
| 135 | N1  | DYZ | 0.00000  | 0.00000  | 0.00000  | 0.00000  | 0.00000  |
| 136 | H6  | S   | -0.06387 | -0.03403 | -0.18801 | -0.02272 | 0.04082  |
| 137 | H6  | S   | -0.03234 | -0.02935 | -0.12633 | -0.02433 | 0.03411  |
| 138 | H6  | PX  | -0.00396 | -0.00143 | -0.00993 | -0.00105 | 0.00197  |
| 139 | H6  | PY  | 0.00102  | 0.00262  | -0.00046 | -0.00053 | -0.00101 |
| 140 | H6  | PZ  | 0.00000  | 0.00000  | 0.00000  | 0.00000  | 0.00000  |
| 141 | C8  | S   | -0.01391 | 0.04034  | 0.00296  | -0.00614 | -0.00422 |
| 142 | C8  | S   | 0.02944  | -0.08157 | -0.00652 | 0.01337  | 0.01229  |
| 143 | C8  | PX  | 0.21140  | -0.01477 | -0.04969 | 0.00946  | -0.04597 |
| 144 | C8  | PY  | 0.02567  | 0.19287  | 0.01378  | 0.05309  | 0.28481  |
| 145 | C8  | PZ  | 0.00000  | 0.00000  | 0.00000  | 0.00000  | 0.00000  |
| 146 | C8  | S   | 0.01456  | -0.07689 | 0.00535  | 0.00509  | 0.03872  |
| 147 | C8  | PX  | 0.05749  | -0.00846 | -0.00048 | -0.02436 | -0.02043 |
| 148 | C8  | PY  | 0.00175  | 0.04255  | 0.00687  | 0.00488  | 0.06865  |
| 149 | C8  | PZ  | 0.00000  | 0.00000  | 0.00000  | 0.00000  | 0.00000  |
| 150 | C8  | DXX | -0.00483 | 0.00989  | 0.00158  | 0.00182  | 0.02229  |
| 151 | C8  | DYY | 0.00607  | -0.00357 | -0.00105 | -0.00052 | -0.01584 |
| 152 | C8  | DZZ | 0.00011  | 0.00101  | -0.00022 | -0.00056 | -0.00228 |
| 153 | C8  | DXY | 0.00247  | -0.00321 | 0.00355  | -0.00849 | -0.01187 |
| 154 | C8  | DXZ | 0.00000  | 0.00000  | 0.00000  | 0.00000  | 0.00000  |
| 155 | C8  | DYZ | 0.00000  | 0.00000  | 0.00000  | 0.00000  | 0.00000  |
| 156 | H8  | S   | -0.04588 | 0.03129  | 0.03607  | -0.12134 | 0.08608  |
| 157 | H8  | S   | -0.02067 | 0.02127  | 0.02468  | -0.08496 | 0.07630  |
| 158 | H8  | PX  | 0.00212  | -0.00165 | -0.00147 | 0.00601  | -0.00420 |
| 159 | H8  | PY  | -0.00382 | 0.00027  | 0.00116  | -0.00095 | -0.00182 |
| 160 | H8  | PZ  | 0.00000  | 0.00000  | 0.00000  | 0.00000  | 0.00000  |
| 161 | C10 | S   | -0.00015 | -0.01351 | -0.00073 | 0.00283  | 0.01965  |
| 162 | C10 | S   | -0.00207 | 0.02536  | 0.00198  | -0.00665 | -0.04177 |
| 163 | C10 | PX  | 0.20343  | -0.02694 | -0.14042 | 0.25234  | 0.04706  |
| 164 | C10 | PY  | -0.01749 | -0.25779 | -0.00872 | -0.05388 | -0.26461 |
| 165 | C10 | PZ  | 0.00000  | 0.00000  | 0.00000  | 0.00000  | 0.00000  |
| 166 | C10 | S   | 0.00153  | 0.04061  | 0.00419  | -0.01365 | -0.05492 |
| 167 | C10 | PX  | 0.08799  | -0.00955 | -0.07029 | 0.12988  | 0.02887  |
| 168 | C10 | PY  | -0.00171 | -0.09457 | -0.00562 | -0.02029 | -0.11082 |
| 169 | C10 | PZ  | 0.00000  | 0.00000  | 0.00000  | 0.00000  | 0.00000  |
| 170 | C10 | DXX | -0.00012 | 0.01586  | 0.00161  | 0.00043  | 0.01382  |
| 171 | C10 | DYY | -0.00022 | -0.01120 | -0.00147 | 0.00014  | -0.00907 |
| 172 | C10 | DZZ | -0.00019 | -0.00207 | -0.00004 | -0.00015 | -0.00005 |
| 173 | C10 | DXY | -0.00487 | -0.00247 | 0.00615  | -0.01499 | -0.00742 |
| 174 | C10 | DXZ | 0.00000  | 0.00000  | 0.00000  | 0.00000  | 0.00000  |

|     |     |     |          |          |          |          |          |
|-----|-----|-----|----------|----------|----------|----------|----------|
| 175 | C10 | DYZ | 0.00000  | 0.00000  | 0.00000  | 0.00000  | 0.00000  |
| 176 | H16 | S   | 0.10169  | 0.09149  | -0.06809 | 0.15274  | 0.10975  |
| 177 | H16 | S   | 0.06775  | 0.06634  | -0.04817 | 0.11593  | 0.09676  |
| 178 | H16 | PX  | -0.00382 | -0.00535 | 0.00224  | -0.00553 | -0.00479 |
| 179 | H16 | PY  | 0.00417  | -0.00012 | -0.00285 | 0.00484  | -0.00007 |
| 180 | H16 | PZ  | 0.00000  | 0.00000  | 0.00000  | 0.00000  | 0.00000  |
| 181 | H18 | S   | -0.09941 | 0.09849  | 0.08001  | -0.13111 | 0.03112  |
| 182 | H18 | S   | -0.05999 | 0.06781  | 0.05133  | -0.08794 | 0.03307  |
| 183 | H18 | PX  | -0.00418 | 0.00589  | 0.00343  | -0.00526 | 0.00204  |
| 184 | H18 | PY  | -0.00406 | -0.00071 | 0.00221  | -0.00416 | -0.00284 |
| 185 | H18 | PZ  | 0.00000  | 0.00000  | 0.00000  | 0.00000  | 0.00000  |

|              |           |           |           |           |           |
|--------------|-----------|-----------|-----------|-----------|-----------|
| MO:          | 26        | 27        | 28        | 29        | 30        |
| Eigenvalues: | -0.56064  | -0.55853  | -0.51793  | -0.49062  | -0.45735  |
| (ev):        | -15.25576 | -15.19827 | -14.09354 | -13.35042 | -12.44505 |

|    |    | A   | A        | A        | A        | A        |          |
|----|----|-----|----------|----------|----------|----------|----------|
| 1  | H1 | S   | 0.05829  | 0.00000  | -0.00809 | -0.12105 | 0.00000  |
| 2  | H1 | S   | 0.04003  | 0.00000  | -0.01195 | -0.10928 | 0.00000  |
| 3  | H1 | PX  | -0.00266 | 0.00000  | -0.00042 | 0.00439  | 0.00000  |
| 4  | H1 | PY  | -0.00059 | 0.00000  | 0.00321  | -0.00066 | 0.00000  |
| 5  | H1 | PZ  | 0.00000  | 0.00219  | 0.00000  | 0.00000  | 0.00451  |
| 6  | C1 | S   | -0.02196 | 0.00000  | -0.00557 | -0.00958 | 0.00000  |
| 7  | C1 | S   | 0.04314  | 0.00000  | 0.01073  | 0.02144  | 0.00000  |
| 8  | C1 | PX  | 0.04630  | 0.00000  | -0.02997 | -0.16550 | 0.00000  |
| 9  | C1 | PY  | -0.01424 | 0.00000  | 0.22327  | -0.09963 | 0.00000  |
| 10 | C1 | PZ  | 0.00000  | 0.10483  | 0.00000  | 0.00000  | 0.21403  |
| 11 | C1 | S   | 0.06425  | 0.00000  | -0.00771 | 0.03228  | 0.00000  |
| 12 | C1 | PX  | 0.03164  | 0.00000  | -0.00245 | -0.10987 | 0.00000  |
| 13 | C1 | PY  | -0.00641 | 0.00000  | 0.09655  | -0.03278 | 0.00000  |
| 14 | C1 | PZ  | 0.00000  | 0.05797  | 0.00000  | 0.00000  | 0.15122  |
| 15 | C1 | DXX | 0.00901  | 0.00000  | -0.00125 | -0.01726 | 0.00000  |
| 16 | C1 | DYY | -0.00867 | 0.00000  | -0.00287 | 0.01628  | 0.00000  |
| 17 | C1 | DZZ | -0.00140 | 0.00000  | -0.00010 | -0.00020 | 0.00000  |
| 18 | C1 | DXY | -0.00499 | 0.00000  | -0.01313 | 0.00560  | 0.00000  |
| 19 | C1 | DXZ | 0.00000  | -0.00683 | 0.00000  | 0.00000  | -0.01216 |
| 20 | C1 | DYZ | 0.00000  | -0.00171 | 0.00000  | 0.00000  | 0.01004  |
| 21 | C2 | S   | 0.00449  | 0.00000  | 0.00927  | -0.00469 | 0.00000  |
| 22 | C2 | S   | -0.00961 | 0.00000  | -0.01582 | 0.01303  | 0.00000  |
| 23 | C2 | PX  | -0.07440 | 0.00000  | 0.07198  | 0.18641  | 0.00000  |
| 24 | C2 | PY  | -0.19696 | 0.00000  | -0.19589 | -0.00046 | 0.00000  |
| 25 | C2 | PZ  | 0.00000  | 0.11756  | 0.00000  | 0.00000  | 0.16070  |
| 26 | C2 | S   | 0.02005  | 0.00000  | -0.02342 | -0.00414 | 0.00000  |
| 27 | C2 | PX  | -0.02488 | 0.00000  | 0.05233  | 0.10952  | 0.00000  |
| 28 | C2 | PY  | -0.06950 | 0.00000  | -0.08117 | -0.01101 | 0.00000  |
| 29 | C2 | PZ  | 0.00000  | 0.06362  | 0.00000  | 0.00000  | 0.11706  |
| 30 | C2 | DXX | 0.00596  | 0.00000  | -0.00547 | -0.01669 | 0.00000  |
| 31 | C2 | DYY | -0.00212 | 0.00000  | 0.00769  | 0.01495  | 0.00000  |
| 32 | C2 | DZZ | -0.00024 | 0.00000  | 0.00064  | 0.00027  | 0.00000  |
| 33 | C2 | DXY | -0.00606 | 0.00000  | -0.01507 | -0.00345 | 0.00000  |
| 34 | C2 | DXZ | 0.00000  | 0.00787  | 0.00000  | 0.00000  | 0.00945  |
| 35 | C2 | DYZ | 0.00000  | -0.00179 | 0.00000  | 0.00000  | 0.01136  |
| 36 | C3 | S   | 0.02831  | 0.00000  | 0.00339  | -0.00907 | 0.00000  |
| 37 | C3 | S   | -0.05998 | 0.00000  | -0.00778 | 0.01785  | 0.00000  |

|    |    |     |          |          |          |          |          |
|----|----|-----|----------|----------|----------|----------|----------|
| 38 | C3 | PX  | 0.08458  | 0.00000  | -0.00741 | 0.17297  | 0.00000  |
| 39 | C3 | PY  | -0.03965 | 0.00000  | -0.19147 | 0.10262  | 0.00000  |
| 40 | C3 | PZ  | 0.00000  | 0.19514  | 0.00000  | 0.00000  | 0.05714  |
| 41 | C3 | S   | -0.08891 | 0.00000  | -0.00617 | 0.00576  | 0.00000  |
| 42 | C3 | PX  | 0.02928  | 0.00000  | -0.00657 | 0.10094  | 0.00000  |
| 43 | C3 | PY  | -0.01709 | 0.00000  | -0.05574 | 0.05322  | 0.00000  |
| 44 | C3 | PZ  | 0.00000  | 0.11756  | 0.00000  | 0.00000  | 0.04332  |
| 45 | C3 | DXX | -0.01067 | 0.00000  | -0.00350 | -0.01682 | 0.00000  |
| 46 | C3 | DYY | 0.00981  | 0.00000  | 0.00230  | 0.01664  | 0.00000  |
| 47 | C3 | DZZ | 0.00080  | 0.00000  | 0.00055  | 0.00013  | 0.00000  |
| 48 | C3 | DXY | 0.00436  | 0.00000  | -0.01617 | 0.00526  | 0.00000  |
| 49 | C3 | DXZ | 0.00000  | -0.00500 | 0.00000  | 0.00000  | 0.00283  |
| 50 | C3 | DYZ | 0.00000  | -0.00707 | 0.00000  | 0.00000  | 0.01042  |
| 51 | C4 | S   | 0.00265  | 0.00000  | 0.00428  | 0.00931  | 0.00000  |
| 52 | C4 | S   | -0.00193 | 0.00000  | -0.00543 | -0.02036 | 0.00000  |
| 53 | C4 | PX  | -0.21685 | 0.00000  | 0.09085  | 0.19138  | 0.00000  |
| 54 | C4 | PY  | -0.14112 | 0.00000  | -0.18845 | 0.08258  | 0.00000  |
| 55 | C4 | PZ  | 0.00000  | 0.08454  | 0.00000  | 0.00000  | 0.25580  |
| 56 | C4 | S   | -0.00716 | 0.00000  | -0.02943 | -0.04693 | 0.00000  |
| 57 | C4 | PX  | -0.09783 | 0.00000  | 0.02840  | 0.09174  | 0.00000  |
| 58 | C4 | PY  | -0.07822 | 0.00000  | -0.08724 | 0.06689  | 0.00000  |
| 59 | C4 | PZ  | 0.00000  | 0.05075  | 0.00000  | 0.00000  | 0.18018  |
| 60 | C4 | DXX | 0.01328  | 0.00000  | -0.00029 | -0.01578 | 0.00000  |
| 61 | C4 | DYY | -0.01359 | 0.00000  | -0.00427 | 0.01573  | 0.00000  |
| 62 | C4 | DZZ | 0.00094  | 0.00000  | 0.00113  | 0.00015  | 0.00000  |
| 63 | C4 | DXY | -0.00936 | 0.00000  | -0.01723 | 0.00539  | 0.00000  |
| 64 | C4 | DXZ | 0.00000  | -0.00033 | 0.00000  | 0.00000  | -0.00165 |
| 65 | C4 | DYZ | 0.00000  | -0.00617 | 0.00000  | 0.00000  | -0.01362 |
| 66 | C5 | S   | -0.00983 | 0.00000  | -0.00128 | 0.00510  | 0.00000  |
| 67 | C5 | S   | 0.02117  | 0.00000  | -0.00246 | -0.01297 | 0.00000  |
| 68 | C5 | PX  | 0.21564  | 0.00000  | -0.06148 | -0.20592 | 0.00000  |
| 69 | C5 | PY  | 0.12382  | 0.00000  | 0.20056  | -0.00885 | 0.00000  |
| 70 | C5 | PZ  | 0.00000  | 0.09004  | 0.00000  | 0.00000  | 0.22646  |
| 71 | C5 | S   | 0.02713  | 0.00000  | 0.01739  | -0.01508 | 0.00000  |
| 72 | C5 | PX  | 0.08291  | 0.00000  | -0.04089 | -0.09978 | 0.00000  |
| 73 | C5 | PY  | 0.05391  | 0.00000  | 0.09943  | 0.00478  | 0.00000  |
| 74 | C5 | PZ  | 0.00000  | 0.05546  | 0.00000  | 0.00000  | 0.15770  |
| 75 | C5 | DXX | 0.01139  | 0.00000  | -0.00595 | -0.01482 | 0.00000  |
| 76 | C5 | DYY | -0.00749 | 0.00000  | 0.01003  | 0.01376  | 0.00000  |
| 77 | C5 | DZZ | -0.00068 | 0.00000  | -0.00135 | -0.00020 | 0.00000  |
| 78 | C5 | DXY | -0.00966 | 0.00000  | -0.01940 | -0.00172 | 0.00000  |
| 79 | C5 | DXZ | 0.00000  | 0.00036  | 0.00000  | 0.00000  | 0.00504  |
| 80 | C5 | DYZ | 0.00000  | -0.00682 | 0.00000  | 0.00000  | -0.01075 |
| 81 | C6 | S   | 0.00356  | 0.00000  | -0.00454 | 0.01715  | 0.00000  |
| 82 | C6 | S   | -0.00613 | 0.00000  | 0.00540  | -0.03986 | 0.00000  |
| 83 | C6 | PX  | -0.15160 | 0.00000  | -0.04462 | -0.19586 | 0.00000  |
| 84 | C6 | PY  | 0.03784  | 0.00000  | 0.23242  | 0.07613  | 0.00000  |
| 85 | C6 | PZ  | 0.00000  | 0.24032  | 0.00000  | 0.00000  | -0.02349 |
| 86 | C6 | S   | -0.01836 | 0.00000  | 0.04079  | -0.02772 | 0.00000  |
| 87 | C6 | PX  | -0.06038 | 0.00000  | -0.04129 | -0.08901 | 0.00000  |
| 88 | C6 | PY  | 0.00422  | 0.00000  | 0.06529  | 0.00960  | 0.00000  |
| 89 | C6 | PZ  | 0.00000  | 0.13965  | 0.00000  | 0.00000  | -0.01787 |
| 90 | C6 | DXX | -0.00395 | 0.00000  | 0.00491  | -0.00749 | 0.00000  |
| 91 | C6 | DYY | 0.00215  | 0.00000  | -0.00378 | 0.00682  | 0.00000  |



|     |    |     |          |          |          |          |          |
|-----|----|-----|----------|----------|----------|----------|----------|
| 92  | C6 | DZZ | -0.00030 | 0.00000  | 0.00185  | 0.00043  | 0.00000  |
| 93  | C6 | DXY | -0.00987 | 0.00000  | -0.01398 | 0.00447  | 0.00000  |
| 94  | C6 | DXZ | 0.00000  | 0.00115  | 0.00000  | 0.00000  | 0.00240  |
| 95  | C6 | DYZ | 0.00000  | -0.01304 | 0.00000  | 0.00000  | 0.01697  |
| 96  | C7 | S   | -0.01716 | 0.00000  | -0.01521 | -0.01672 | 0.00000  |
| 97  | C7 | S   | 0.03965  | 0.00000  | 0.03138  | 0.03879  | 0.00000  |
| 98  | C7 | PX  | -0.20006 | 0.00000  | -0.00184 | -0.19425 | 0.00000  |
| 99  | C7 | PY  | -0.02472 | 0.00000  | 0.16704  | -0.05704 | 0.00000  |
| 100 | C7 | PZ  | 0.00000  | 0.15928  | 0.00000  | 0.00000  | -0.04209 |
| 101 | C7 | S   | 0.03062  | 0.00000  | 0.05772  | 0.06857  | 0.00000  |
| 102 | C7 | PX  | -0.08877 | 0.00000  | -0.00303 | -0.11325 | 0.00000  |
| 103 | C7 | PY  | 0.00549  | 0.00000  | 0.06253  | -0.02389 | 0.00000  |
| 104 | C7 | PZ  | 0.00000  | 0.09337  | 0.00000  | 0.00000  | -0.03138 |
| 105 | C7 | DXX | -0.00031 | 0.00000  | -0.00613 | -0.00443 | 0.00000  |
| 106 | C7 | DYY | 0.00047  | 0.00000  | 0.00464  | 0.00362  | 0.00000  |
| 107 | C7 | DZZ | -0.00050 | 0.00000  | -0.00006 | 0.00027  | 0.00000  |
| 108 | C7 | DXY | 0.01221  | 0.00000  | -0.00732 | 0.01848  | 0.00000  |
| 109 | C7 | DXZ | 0.00000  | -0.01091 | 0.00000  | 0.00000  | 0.00565  |
| 110 | C7 | DYZ | 0.00000  | 0.00748  | 0.00000  | 0.00000  | 0.00604  |
| 111 | H3 | S   | -0.15372 | 0.00000  | -0.10339 | 0.10834  | 0.00000  |
| 112 | H3 | S   | -0.12257 | 0.00000  | -0.09106 | 0.09730  | 0.00000  |
| 113 | H3 | PX  | 0.00148  | 0.00000  | 0.00389  | -0.00034 | 0.00000  |
| 114 | H3 | PY  | 0.00718  | 0.00000  | 0.00229  | -0.00443 | 0.00000  |
| 115 | H3 | PZ  | 0.00000  | 0.00164  | 0.00000  | 0.00000  | 0.00546  |
| 116 | H4 | S   | 0.01319  | 0.00000  | 0.15271  | 0.06630  | 0.00000  |
| 117 | H4 | S   | 0.00868  | 0.00000  | 0.13340  | 0.06095  | 0.00000  |
| 118 | H4 | PX  | 0.00308  | 0.00000  | 0.00390  | -0.00051 | 0.00000  |
| 119 | H4 | PY  | 0.00163  | 0.00000  | -0.00452 | -0.00342 | 0.00000  |
| 120 | H4 | PZ  | 0.00000  | 0.00169  | 0.00000  | 0.00000  | 0.00477  |
| 121 | N1 | S   | 0.02446  | 0.00000  | -0.02256 | -0.02007 | 0.00000  |
| 122 | N1 | S   | -0.05466 | 0.00000  | 0.05164  | 0.04389  | 0.00000  |
| 123 | N1 | PX  | 0.00851  | 0.00000  | -0.11151 | -0.14990 | 0.00000  |
| 124 | N1 | PY  | 0.04498  | 0.00000  | -0.20840 | 0.02951  | 0.00000  |
| 125 | N1 | PZ  | 0.00000  | 0.25471  | 0.00000  | 0.00000  | -0.15802 |
| 126 | N1 | S   | -0.08113 | 0.00000  | 0.07619  | 0.07823  | 0.00000  |
| 127 | N1 | PX  | 0.01248  | 0.00000  | -0.07738 | -0.09635 | 0.00000  |
| 128 | N1 | PY  | 0.01555  | 0.00000  | -0.11727 | 0.00234  | 0.00000  |
| 129 | N1 | PZ  | 0.00000  | 0.16143  | 0.00000  | 0.00000  | -0.11548 |
| 130 | N1 | DXX | 0.00263  | 0.00000  | -0.00460 | -0.00948 | 0.00000  |
| 131 | N1 | DYY | 0.00097  | 0.00000  | -0.00195 | 0.00154  | 0.00000  |
| 132 | N1 | DZZ | -0.00093 | 0.00000  | 0.00383  | 0.00307  | 0.00000  |
| 133 | N1 | DXY | -0.00065 | 0.00000  | -0.01762 | -0.00477 | 0.00000  |
| 134 | N1 | DXZ | 0.00000  | 0.02153  | 0.00000  | 0.00000  | -0.01360 |
| 135 | N1 | DYZ | 0.00000  | 0.01218  | 0.00000  | 0.00000  | -0.00076 |
| 136 | H6 | S   | 0.04970  | 0.00000  | -0.05718 | -0.13294 | 0.00000  |
| 137 | H6 | S   | 0.03908  | 0.00000  | -0.03741 | -0.10872 | 0.00000  |
| 138 | H6 | PX  | 0.00183  | 0.00000  | -0.00259 | -0.00497 | 0.00000  |
| 139 | H6 | PY  | -0.00293 | 0.00000  | -0.00292 | -0.00061 | 0.00000  |
| 140 | H6 | PZ  | 0.00000  | 0.00248  | 0.00000  | 0.00000  | 0.00315  |
| 141 | C8 | S   | -0.01855 | 0.00000  | 0.00869  | -0.01342 | 0.00000  |
| 142 | C8 | S   | 0.03872  | 0.00000  | -0.01937 | 0.02600  | 0.00000  |
| 143 | C8 | PX  | 0.11073  | 0.00000  | -0.10584 | 0.16921  | 0.00000  |
| 144 | C8 | PY  | 0.13116  | 0.00000  | 0.00133  | 0.09508  | 0.00000  |
| 145 | C8 | PZ  | 0.00000  | 0.19254  | 0.00000  | 0.00000  | -0.19895 |

|     |     |     |          |          |          |          |          |
|-----|-----|-----|----------|----------|----------|----------|----------|
| 146 | C8  | S   | 0.06815  | 0.00000  | -0.02123 | 0.05862  | 0.00000  |
| 147 | C8  | PX  | 0.07272  | 0.00000  | -0.07879 | 0.06991  | 0.00000  |
| 148 | C8  | PY  | 0.02958  | 0.00000  | 0.00064  | 0.00758  | 0.00000  |
| 149 | C8  | PZ  | 0.00000  | 0.11214  | 0.00000  | 0.00000  | -0.13502 |
| 150 | C8  | DXX | 0.00395  | 0.00000  | 0.00541  | 0.00837  | 0.00000  |
| 151 | C8  | DYY | -0.00086 | 0.00000  | -0.00638 | -0.00879 | 0.00000  |
| 152 | C8  | DZZ | -0.00056 | 0.00000  | -0.00032 | 0.00045  | 0.00000  |
| 153 | C8  | DXY | 0.01712  | 0.00000  | -0.00701 | 0.01551  | 0.00000  |
| 154 | C8  | DXZ | 0.00000  | -0.00381 | 0.00000  | 0.00000  | 0.00415  |
| 155 | C8  | DYZ | 0.00000  | 0.00558  | 0.00000  | 0.00000  | 0.00365  |
| 156 | H8  | S   | -0.10085 | 0.00000  | -0.02222 | -0.10413 | 0.00000  |
| 157 | H8  | S   | -0.08221 | 0.00000  | -0.02230 | -0.09943 | 0.00000  |
| 158 | H8  | PX  | 0.00390  | 0.00000  | 0.00162  | 0.00297  | 0.00000  |
| 159 | H8  | PY  | -0.00260 | 0.00000  | 0.00176  | -0.00295 | 0.00000  |
| 160 | H8  | PZ  | 0.00000  | 0.00330  | 0.00000  | 0.00000  | -0.00081 |
| 161 | C10 | S   | 0.00350  | 0.00000  | 0.00396  | 0.00948  | 0.00000  |
| 162 | C10 | S   | -0.00739 | 0.00000  | -0.00821 | -0.02022 | 0.00000  |
| 163 | C10 | PX  | -0.19241 | 0.00000  | 0.14582  | -0.07739 | 0.00000  |
| 164 | C10 | PY  | -0.08475 | 0.00000  | -0.02419 | -0.07573 | 0.00000  |
| 165 | C10 | PZ  | 0.00000  | 0.09743  | 0.00000  | 0.00000  | -0.14133 |
| 166 | C10 | S   | -0.01034 | 0.00000  | -0.01650 | -0.04513 | 0.00000  |
| 167 | C10 | PX  | -0.10955 | 0.00000  | 0.08730  | -0.04752 | 0.00000  |
| 168 | C10 | PY  | -0.04444 | 0.00000  | -0.00620 | -0.04258 | 0.00000  |
| 169 | C10 | PZ  | 0.00000  | 0.05719  | 0.00000  | 0.00000  | -0.10163 |
| 170 | C10 | DXX | 0.00637  | 0.00000  | -0.00051 | 0.00480  | 0.00000  |
| 171 | C10 | DYY | -0.00564 | 0.00000  | 0.00131  | -0.00347 | 0.00000  |
| 172 | C10 | DZZ | 0.00015  | 0.00000  | -0.00015 | 0.00025  | 0.00000  |
| 173 | C10 | DXY | 0.01341  | 0.00000  | -0.01258 | 0.00962  | 0.00000  |
| 174 | C10 | DXZ | 0.00000  | 0.00078  | 0.00000  | 0.00000  | -0.00083 |
| 175 | C10 | DYZ | 0.00000  | 0.01065  | 0.00000  | 0.00000  | -0.01250 |
| 176 | H16 | S   | -0.08138 | 0.00000  | 0.09337  | -0.03159 | 0.00000  |
| 177 | H16 | S   | -0.06429 | 0.00000  | 0.08066  | -0.02869 | 0.00000  |
| 178 | H16 | PX  | 0.00177  | 0.00000  | -0.00315 | 0.00017  | 0.00000  |
| 179 | H16 | PY  | -0.00429 | 0.00000  | 0.00273  | -0.00196 | 0.00000  |
| 180 | H16 | PZ  | 0.00000  | 0.00208  | 0.00000  | 0.00000  | -0.00307 |
| 181 | H18 | S   | 0.13603  | 0.00000  | -0.08726 | 0.06799  | 0.00000  |
| 182 | H18 | S   | 0.09760  | 0.00000  | -0.06089 | 0.06597  | 0.00000  |
| 183 | H18 | PX  | 0.00565  | 0.00000  | -0.00360 | 0.00238  | 0.00000  |
| 184 | H18 | PY  | 0.00193  | 0.00000  | -0.00174 | 0.00044  | 0.00000  |
| 185 | H18 | PZ  | 0.00000  | 0.00210  | 0.00000  | 0.00000  | -0.00306 |

MO:                                    31                                    32                                    33                                    34                                    35  
Eigenvalues:                        -0.41260                        -0.39954                        -0.33330                        -0.29083                        0.03440  
(ev):                                    -11.22740                        -10.87203                        -9.06956                        -7.91387                        0.93598

|   |    |    | A        | A       | A        | A        | A       |
|---|----|----|----------|---------|----------|----------|---------|
| 1 | H1 | S  | 0.06571  | 0.00000 | 0.00000  | 0.00000  | 0.00000 |
| 2 | H1 | S  | 0.07175  | 0.00000 | 0.00000  | 0.00000  | 0.00000 |
| 3 | H1 | PX | -0.00207 | 0.00000 | 0.00000  | 0.00000  | 0.00000 |
| 4 | H1 | PY | 0.00015  | 0.00000 | 0.00000  | 0.00000  | 0.00000 |
| 5 | H1 | PZ | 0.00000  | 0.00454 | -0.00020 | -0.00557 | 0.00466 |
| 6 | C1 | S  | 0.00887  | 0.00000 | 0.00000  | 0.00000  | 0.00000 |
| 7 | C1 | S  | -0.02022 | 0.00000 | 0.00000  | 0.00000  | 0.00000 |
| 8 | C1 | PX | 0.08865  | 0.00000 | 0.00000  | 0.00000  | 0.00000 |

|    |    |     |          |          |          |          |          |
|----|----|-----|----------|----------|----------|----------|----------|
| 9  | C1 | PY  | 0.02576  | 0.00000  | 0.00000  | 0.00000  | 0.00000  |
| 10 | C1 | PZ  | 0.00000  | 0.19553  | -0.01614 | -0.22352 | 0.15014  |
| 11 | C1 | S   | -0.04265 | 0.00000  | 0.00000  | 0.00000  | 0.00000  |
| 12 | C1 | PX  | 0.05610  | 0.00000  | 0.00000  | 0.00000  | 0.00000  |
| 13 | C1 | PY  | 0.03714  | 0.00000  | 0.00000  | 0.00000  | 0.00000  |
| 14 | C1 | PZ  | 0.00000  | 0.14677  | -0.02277 | -0.20082 | 0.21567  |
| 15 | C1 | DXX | 0.01015  | 0.00000  | 0.00000  | 0.00000  | 0.00000  |
| 16 | C1 | DYY | -0.01047 | 0.00000  | 0.00000  | 0.00000  | 0.00000  |
| 17 | C1 | DZZ | -0.00024 | 0.00000  | 0.00000  | 0.00000  | 0.00000  |
| 18 | C1 | DXY | 0.00287  | 0.00000  | 0.00000  | 0.00000  | 0.00000  |
| 19 | C1 | DXZ | 0.00000  | -0.00770 | 0.00135  | 0.00775  | -0.00104 |
| 20 | C1 | DYZ | 0.00000  | -0.00226 | -0.01321 | -0.01687 | -0.01223 |
| 21 | C2 | S   | 0.01846  | 0.00000  | 0.00000  | 0.00000  | 0.00000  |
| 22 | C2 | S   | -0.03742 | 0.00000  | 0.00000  | 0.00000  | 0.00000  |
| 23 | C2 | PX  | -0.08753 | 0.00000  | 0.00000  | 0.00000  | 0.00000  |
| 24 | C2 | PY  | 0.10429  | 0.00000  | 0.00000  | 0.00000  | 0.00000  |
| 25 | C2 | PZ  | 0.00000  | -0.23336 | -0.06465 | 0.22514  | 0.13652  |
| 26 | C2 | S   | -0.10344 | 0.00000  | 0.00000  | 0.00000  | 0.00000  |
| 27 | C2 | PX  | -0.05512 | 0.00000  | 0.00000  | 0.00000  | 0.00000  |
| 28 | C2 | PY  | 0.04402  | 0.00000  | 0.00000  | 0.00000  | 0.00000  |
| 29 | C2 | PZ  | 0.00000  | -0.17535 | -0.06012 | 0.20282  | 0.20857  |
| 30 | C2 | DXX | 0.00905  | 0.00000  | 0.00000  | 0.00000  | 0.00000  |
| 31 | C2 | DYY | -0.00948 | 0.00000  | 0.00000  | 0.00000  | 0.00000  |
| 32 | C2 | DZZ | 0.00064  | 0.00000  | 0.00000  | 0.00000  | 0.00000  |
| 33 | C2 | DXY | 0.00411  | 0.00000  | 0.00000  | 0.00000  | 0.00000  |
| 34 | C2 | DXZ | 0.00000  | -0.01004 | -0.00210 | 0.00776  | 0.00263  |
| 35 | C2 | DYZ | 0.00000  | -0.00319 | -0.01416 | 0.01156  | -0.01480 |
| 36 | C3 | S   | -0.02061 | 0.00000  | 0.00000  | 0.00000  | 0.00000  |
| 37 | C3 | S   | 0.04186  | 0.00000  | 0.00000  | 0.00000  | 0.00000  |
| 38 | C3 | PX  | -0.22022 | 0.00000  | 0.00000  | 0.00000  | 0.00000  |
| 39 | C3 | PY  | 0.00175  | 0.00000  | 0.00000  | 0.00000  | 0.00000  |
| 40 | C3 | PZ  | 0.00000  | 0.21952  | 0.20608  | 0.13945  | 0.12177  |
| 41 | C3 | S   | 0.11754  | 0.00000  | 0.00000  | 0.00000  | 0.00000  |
| 42 | C3 | PX  | -0.11418 | 0.00000  | 0.00000  | 0.00000  | 0.00000  |
| 43 | C3 | PY  | 0.04406  | 0.00000  | 0.00000  | 0.00000  | 0.00000  |
| 44 | C3 | PZ  | 0.00000  | 0.16011  | 0.18065  | 0.13713  | 0.15114  |
| 45 | C3 | DXX | 0.00905  | 0.00000  | 0.00000  | 0.00000  | 0.00000  |
| 46 | C3 | DYY | -0.00628 | 0.00000  | 0.00000  | 0.00000  | 0.00000  |
| 47 | C3 | DZZ | -0.00013 | 0.00000  | 0.00000  | 0.00000  | 0.00000  |
| 48 | C3 | DXY | 0.00046  | 0.00000  | 0.00000  | 0.00000  | 0.00000  |
| 49 | C3 | DXZ | 0.00000  | 0.01200  | -0.00546 | 0.00201  | -0.00757 |
| 50 | C3 | DYZ | 0.00000  | -0.00619 | -0.00757 | -0.02184 | 0.02205  |
| 51 | C4 | S   | 0.00255  | 0.00000  | 0.00000  | 0.00000  | 0.00000  |
| 52 | C4 | S   | -0.00474 | 0.00000  | 0.00000  | 0.00000  | 0.00000  |
| 53 | C4 | PX  | -0.05758 | 0.00000  | 0.00000  | 0.00000  | 0.00000  |
| 54 | C4 | PY  | 0.02256  | 0.00000  | 0.00000  | 0.00000  | 0.00000  |
| 55 | C4 | PZ  | 0.00000  | 0.09067  | -0.13757 | -0.21480 | -0.14883 |
| 56 | C4 | S   | -0.01744 | 0.00000  | 0.00000  | 0.00000  | 0.00000  |
| 57 | C4 | PX  | -0.03743 | 0.00000  | 0.00000  | 0.00000  | 0.00000  |
| 58 | C4 | PY  | 0.01236  | 0.00000  | 0.00000  | 0.00000  | 0.00000  |
| 59 | C4 | PZ  | 0.00000  | 0.07254  | -0.11277 | -0.20805 | -0.19642 |
| 60 | C4 | DXX | 0.00474  | 0.00000  | 0.00000  | 0.00000  | 0.00000  |
| 61 | C4 | DYY | -0.00432 | 0.00000  | 0.00000  | 0.00000  | 0.00000  |
| 62 | C4 | DZZ | -0.00003 | 0.00000  | 0.00000  | 0.00000  | 0.00000  |

|     |    |     |          |          |          |          |          |
|-----|----|-----|----------|----------|----------|----------|----------|
| 63  | C4 | DXY | 0.00128  | 0.00000  | 0.00000  | 0.00000  | 0.00000  |
| 64  | C4 | DXZ | 0.00000  | 0.01122  | 0.00504  | -0.01376 | 0.01263  |
| 65  | C4 | DYZ | 0.00000  | -0.00883 | 0.00244  | 0.01220  | -0.00861 |
| 66  | C5 | S   | -0.00528 | 0.00000  | 0.00000  | 0.00000  | 0.00000  |
| 67  | C5 | S   | 0.00762  | 0.00000  | 0.00000  | 0.00000  | 0.00000  |
| 68  | C5 | PX  | 0.04338  | 0.00000  | 0.00000  | 0.00000  | 0.00000  |
| 69  | C5 | PY  | -0.03246 | 0.00000  | 0.00000  | 0.00000  | 0.00000  |
| 70  | C5 | PZ  | 0.00000  | -0.16043 | -0.16691 | 0.15793  | -0.16803 |
| 71  | C5 | S   | 0.03668  | 0.00000  | 0.00000  | 0.00000  | 0.00000  |
| 72  | C5 | PX  | 0.02753  | 0.00000  | 0.00000  | 0.00000  | 0.00000  |
| 73  | C5 | PY  | -0.04794 | 0.00000  | 0.00000  | 0.00000  | 0.00000  |
| 74  | C5 | PZ  | 0.00000  | -0.12586 | -0.13788 | 0.15760  | -0.22436 |
| 75  | C5 | DXX | 0.00518  | 0.00000  | 0.00000  | 0.00000  | 0.00000  |
| 76  | C5 | DYY | -0.00552 | 0.00000  | 0.00000  | 0.00000  | 0.00000  |
| 77  | C5 | DZZ | -0.00098 | 0.00000  | 0.00000  | 0.00000  | 0.00000  |
| 78  | C5 | DXY | 0.00506  | 0.00000  | 0.00000  | 0.00000  | 0.00000  |
| 79  | C5 | DXZ | 0.00000  | 0.00932  | -0.00284 | -0.01505 | -0.01048 |
| 80  | C5 | DYZ | 0.00000  | 0.01250  | 0.00449  | -0.01316 | -0.00895 |
| 81  | C6 | S   | 0.02069  | 0.00000  | 0.00000  | 0.00000  | 0.00000  |
| 82  | C6 | S   | -0.05790 | 0.00000  | 0.00000  | 0.00000  | 0.00000  |
| 83  | C6 | PX  | 0.18981  | 0.00000  | 0.00000  | 0.00000  | 0.00000  |
| 84  | C6 | PY  | 0.04432  | 0.00000  | 0.00000  | 0.00000  | 0.00000  |
| 85  | C6 | PZ  | 0.00000  | -0.18085 | 0.19332  | -0.05641 | 0.15857  |
| 86  | C6 | S   | 0.03068  | 0.00000  | 0.00000  | 0.00000  | 0.00000  |
| 87  | C6 | PX  | 0.05040  | 0.00000  | 0.00000  | 0.00000  | 0.00000  |
| 88  | C6 | PY  | -0.03691 | 0.00000  | 0.00000  | 0.00000  | 0.00000  |
| 89  | C6 | PZ  | 0.00000  | -0.12806 | 0.15415  | -0.06280 | 0.16019  |
| 90  | C6 | DXX | 0.02499  | 0.00000  | 0.00000  | 0.00000  | 0.00000  |
| 91  | C6 | DYY | -0.02425 | 0.00000  | 0.00000  | 0.00000  | 0.00000  |
| 92  | C6 | DZZ | 0.00184  | 0.00000  | 0.00000  | 0.00000  | 0.00000  |
| 93  | C6 | DXY | 0.02102  | 0.00000  | 0.00000  | 0.00000  | 0.00000  |
| 94  | C6 | DXZ | 0.00000  | 0.01726  | 0.00646  | 0.00858  | 0.00436  |
| 95  | C6 | DYZ | 0.00000  | 0.00447  | -0.00958 | 0.02476  | 0.02188  |
| 96  | C7 | S   | -0.01306 | 0.00000  | 0.00000  | 0.00000  | 0.00000  |
| 97  | C7 | S   | 0.02640  | 0.00000  | 0.00000  | 0.00000  | 0.00000  |
| 98  | C7 | PX  | -0.09657 | 0.00000  | 0.00000  | 0.00000  | 0.00000  |
| 99  | C7 | PY  | -0.11827 | 0.00000  | 0.00000  | 0.00000  | 0.00000  |
| 100 | C7 | PZ  | 0.00000  | 0.22243  | 0.06792  | 0.24861  | -0.23108 |
| 101 | C7 | S   | 0.09656  | 0.00000  | 0.00000  | 0.00000  | 0.00000  |
| 102 | C7 | PX  | -0.05538 | 0.00000  | 0.00000  | 0.00000  | 0.00000  |
| 103 | C7 | PY  | -0.08417 | 0.00000  | 0.00000  | 0.00000  | 0.00000  |
| 104 | C7 | PZ  | 0.00000  | 0.17787  | 0.05418  | 0.22947  | -0.29281 |
| 105 | C7 | DXX | 0.00302  | 0.00000  | 0.00000  | 0.00000  | 0.00000  |
| 106 | C7 | DYY | 0.00025  | 0.00000  | 0.00000  | 0.00000  | 0.00000  |
| 107 | C7 | DZZ | 0.00026  | 0.00000  | 0.00000  | 0.00000  | 0.00000  |
| 108 | C7 | DXY | 0.00002  | 0.00000  | 0.00000  | 0.00000  | 0.00000  |
| 109 | C7 | DXZ | 0.00000  | -0.00739 | 0.00138  | -0.00623 | 0.00492  |
| 110 | C7 | DYZ | 0.00000  | 0.01117  | 0.01905  | 0.00900  | 0.00545  |
| 111 | H3 | S   | -0.00821 | 0.00000  | 0.00000  | 0.00000  | 0.00000  |
| 112 | H3 | S   | -0.00686 | 0.00000  | 0.00000  | 0.00000  | 0.00000  |
| 113 | H3 | PX  | -0.00047 | 0.00000  | 0.00000  | 0.00000  | 0.00000  |
| 114 | H3 | PY  | 0.00042  | 0.00000  | 0.00000  | 0.00000  | 0.00000  |
| 115 | H3 | PZ  | 0.00000  | 0.00205  | -0.00340 | -0.00523 | -0.00534 |
| 116 | H4 | S   | -0.03803 | 0.00000  | 0.00000  | 0.00000  | 0.00000  |

|     |     |     |          |          |          |          |          |
|-----|-----|-----|----------|----------|----------|----------|----------|
| 117 | H4  | S   | -0.03275 | 0.00000  | 0.00000  | 0.00000  | 0.00000  |
| 118 | H4  | PX  | -0.00031 | 0.00000  | 0.00000  | 0.00000  | 0.00000  |
| 119 | H4  | PY  | 0.00089  | 0.00000  | 0.00000  | 0.00000  | 0.00000  |
| 120 | H4  | PZ  | 0.00000  | -0.00358 | -0.00402 | 0.00370  | -0.00587 |
| 121 | N1  | S   | -0.06370 | 0.00000  | 0.00000  | 0.00000  | 0.00000  |
| 122 | N1  | S   | 0.13749  | 0.00000  | 0.00000  | 0.00000  | 0.00000  |
| 123 | N1  | PX  | -0.45341 | 0.00000  | 0.00000  | 0.00000  | 0.00000  |
| 124 | N1  | PY  | -0.10426 | 0.00000  | 0.00000  | 0.00000  | 0.00000  |
| 125 | N1  | PZ  | 0.00000  | -0.20217 | 0.08992  | -0.27021 | -0.17580 |
| 126 | N1  | S   | 0.24774  | 0.00000  | 0.00000  | 0.00000  | 0.00000  |
| 127 | N1  | PX  | -0.35810 | 0.00000  | 0.00000  | 0.00000  | 0.00000  |
| 128 | N1  | PY  | -0.08874 | 0.00000  | 0.00000  | 0.00000  | 0.00000  |
| 129 | N1  | PZ  | 0.00000  | -0.16244 | 0.08295  | -0.24417 | -0.19485 |
| 130 | N1  | DXX | -0.02542 | 0.00000  | 0.00000  | 0.00000  | 0.00000  |
| 131 | N1  | DYY | -0.00297 | 0.00000  | 0.00000  | 0.00000  | 0.00000  |
| 132 | N1  | DZZ | 0.01062  | 0.00000  | 0.00000  | 0.00000  | 0.00000  |
| 133 | N1  | DXY | -0.00376 | 0.00000  | 0.00000  | 0.00000  | 0.00000  |
| 134 | N1  | DXZ | 0.00000  | -0.01086 | 0.00311  | -0.01518 | -0.01141 |
| 135 | N1  | DYZ | 0.00000  | -0.01422 | 0.01795  | -0.00886 | 0.00453  |
| 136 | H6  | S   | 0.05200  | 0.00000  | 0.00000  | 0.00000  | 0.00000  |
| 137 | H6  | S   | 0.07985  | 0.00000  | 0.00000  | 0.00000  | 0.00000  |
| 138 | H6  | PX  | 0.00181  | 0.00000  | 0.00000  | 0.00000  | 0.00000  |
| 139 | H6  | PY  | 0.00063  | 0.00000  | 0.00000  | 0.00000  | 0.00000  |
| 140 | H6  | PZ  | 0.00000  | -0.00526 | -0.00137 | 0.00538  | 0.00395  |
| 141 | C8  | S   | 0.02869  | 0.00000  | 0.00000  | 0.00000  | 0.00000  |
| 142 | C8  | S   | -0.07019 | 0.00000  | 0.00000  | 0.00000  | 0.00000  |
| 143 | C8  | PX  | 0.17716  | 0.00000  | 0.00000  | 0.00000  | 0.00000  |
| 144 | C8  | PY  | -0.05369 | 0.00000  | 0.00000  | 0.00000  | 0.00000  |
| 145 | C8  | PZ  | 0.00000  | 0.06863  | -0.26226 | 0.00570  | -0.08309 |
| 146 | C8  | S   | -0.05674 | 0.00000  | 0.00000  | 0.00000  | 0.00000  |
| 147 | C8  | PX  | 0.02008  | 0.00000  | 0.00000  | 0.00000  | 0.00000  |
| 148 | C8  | PY  | -0.03286 | 0.00000  | 0.00000  | 0.00000  | 0.00000  |
| 149 | C8  | PZ  | 0.00000  | 0.04250  | -0.20817 | -0.00429 | -0.12808 |
| 150 | C8  | DXX | 0.01314  | 0.00000  | 0.00000  | 0.00000  | 0.00000  |
| 151 | C8  | DYY | -0.01763 | 0.00000  | 0.00000  | 0.00000  | 0.00000  |
| 152 | C8  | DZZ | 0.00175  | 0.00000  | 0.00000  | 0.00000  | 0.00000  |
| 153 | C8  | DXY | 0.01688  | 0.00000  | 0.00000  | 0.00000  | 0.00000  |
| 154 | C8  | DXZ | 0.00000  | 0.01431  | -0.00113 | 0.01973  | -0.00260 |
| 155 | C8  | DYZ | 0.00000  | -0.00522 | 0.02647  | -0.00332 | -0.02745 |
| 156 | H8  | S   | -0.01773 | 0.00000  | 0.00000  | 0.00000  | 0.00000  |
| 157 | H8  | S   | -0.02505 | 0.00000  | 0.00000  | 0.00000  | 0.00000  |
| 158 | H8  | PX  | 0.00065  | 0.00000  | 0.00000  | 0.00000  | 0.00000  |
| 159 | H8  | PY  | -0.00278 | 0.00000  | 0.00000  | 0.00000  | 0.00000  |
| 160 | H8  | PZ  | 0.00000  | 0.00515  | 0.00142  | 0.00638  | -0.00793 |
| 161 | C10 | S   | 0.00825  | 0.00000  | 0.00000  | 0.00000  | 0.00000  |
| 162 | C10 | S   | -0.01906 | 0.00000  | 0.00000  | 0.00000  | 0.00000  |
| 163 | C10 | PX  | -0.02188 | 0.00000  | 0.00000  | 0.00000  | 0.00000  |
| 164 | C10 | PY  | -0.02298 | 0.00000  | 0.00000  | 0.00000  | 0.00000  |
| 165 | C10 | PZ  | 0.00000  | 0.06425  | -0.30721 | 0.01696  | 0.26557  |
| 166 | C10 | S   | -0.05537 | 0.00000  | 0.00000  | 0.00000  | 0.00000  |
| 167 | C10 | PX  | 0.00103  | 0.00000  | 0.00000  | 0.00000  | 0.00000  |
| 168 | C10 | PY  | -0.00055 | 0.00000  | 0.00000  | 0.00000  | 0.00000  |
| 169 | C10 | PZ  | 0.00000  | 0.05398  | -0.26954 | 0.01980  | 0.37242  |
| 170 | C10 | DXX | 0.00237  | 0.00000  | 0.00000  | 0.00000  | 0.00000  |

|     |     |     |          |         |          |          |          |
|-----|-----|-----|----------|---------|----------|----------|----------|
| 171 | C10 | DYY | -0.00065 | 0.00000 | 0.00000  | 0.00000  | 0.00000  |
| 172 | C10 | DZZ | -0.00050 | 0.00000 | 0.00000  | 0.00000  | 0.00000  |
| 173 | C10 | DXY | 0.00832  | 0.00000 | 0.00000  | 0.00000  | 0.00000  |
| 174 | C10 | DXZ | 0.00000  | 0.00195 | -0.00214 | 0.00255  | -0.00001 |
| 175 | C10 | DYZ | 0.00000  | 0.00488 | -0.01979 | 0.00073  | -0.00224 |
| 176 | H16 | S   | -0.01950 | 0.00000 | 0.00000  | 0.00000  | 0.00000  |
| 177 | H16 | S   | -0.01731 | 0.00000 | 0.00000  | 0.00000  | 0.00000  |
| 178 | H16 | PX  | -0.00014 | 0.00000 | 0.00000  | 0.00000  | 0.00000  |
| 179 | H16 | PY  | -0.00024 | 0.00000 | 0.00000  | 0.00000  | 0.00000  |
| 180 | H16 | PZ  | 0.00000  | 0.00165 | -0.00720 | 0.00077  | 0.00862  |
| 181 | H18 | S   | 0.02449  | 0.00000 | 0.00000  | 0.00000  | 0.00000  |
| 182 | H18 | S   | 0.06222  | 0.00000 | 0.00000  | 0.00000  | 0.00000  |
| 183 | H18 | PX  | 0.00012  | 0.00000 | 0.00000  | 0.00000  | 0.00000  |
| 184 | H18 | PY  | 0.00119  | 0.00000 | 0.00000  | 0.00000  | 0.00000  |
| 185 | H18 | PZ  | 0.00000  | 0.00109 | -0.00684 | -0.00007 | 0.00838  |

|              |         |         |         |         |         |
|--------------|---------|---------|---------|---------|---------|
| MO:          | 36      | 37      | 38      | 39      | 40      |
| Eigenvalues: | 0.17203 | 0.19622 | 0.24449 | 0.26350 | 0.28437 |
| (ev):        | 4.68115 | 5.33948 | 6.65287 | 7.17009 | 7.73808 |

|    |    | A   | A       | A        | A        | A        |         |
|----|----|-----|---------|----------|----------|----------|---------|
| 1  | H1 | S   | 0.00000 | 0.00000  | -0.03010 | 0.00068  | 0.00000 |
| 2  | H1 | S   | 0.00000 | 0.00000  | -0.94876 | -0.58727 | 0.00000 |
| 3  | H1 | PX  | 0.00000 | 0.00000  | 0.00101  | 0.00327  | 0.00000 |
| 4  | H1 | PY  | 0.00000 | 0.00000  | 0.00147  | 0.00243  | 0.00000 |
| 5  | H1 | PZ  | 0.01169 | 0.00436  | 0.00000  | 0.00000  | 0.00356 |
| 6  | C1 | S   | 0.00000 | 0.00000  | -0.04148 | -0.01226 | 0.00000 |
| 7  | C1 | S   | 0.00000 | 0.00000  | 0.05493  | -0.00284 | 0.00000 |
| 8  | C1 | PX  | 0.00000 | 0.00000  | 0.12054  | 0.08192  | 0.00000 |
| 9  | C1 | PY  | 0.00000 | 0.00000  | 0.01037  | 0.02457  | 0.00000 |
| 10 | C1 | PZ  | 0.26841 | 0.10644  | 0.00000  | 0.00000  | 0.05096 |
| 11 | C1 | S   | 0.00000 | 0.00000  | 0.65003  | 0.44337  | 0.00000 |
| 12 | C1 | PX  | 0.00000 | 0.00000  | 0.44568  | 0.37706  | 0.00000 |
| 13 | C1 | PY  | 0.00000 | 0.00000  | -0.09971 | -0.04016 | 0.00000 |
| 14 | C1 | PZ  | 0.51787 | 0.20165  | 0.00000  | 0.00000  | 0.20857 |
| 15 | C1 | DXX | 0.00000 | 0.00000  | -0.01538 | -0.00116 | 0.00000 |
| 16 | C1 | DYY | 0.00000 | 0.00000  | 0.00981  | 0.00426  | 0.00000 |
| 17 | C1 | DZZ | 0.00000 | 0.00000  | 0.00026  | -0.00341 | 0.00000 |
| 18 | C1 | DXY | 0.00000 | 0.00000  | 0.00283  | 0.00034  | 0.00000 |
| 19 | C1 | DXZ | 0.01067 | 0.00249  | 0.00000  | 0.00000  | 0.00846 |
| 20 | C1 | DYZ | 0.00181 | -0.03054 | 0.00000  | 0.00000  | 0.00404 |
| 21 | C2 | S   | 0.00000 | 0.00000  | -0.03163 | 0.01228  | 0.00000 |
| 22 | C2 | S   | 0.00000 | 0.00000  | 0.04481  | -0.01915 | 0.00000 |
| 23 | C2 | PX  | 0.00000 | 0.00000  | -0.09046 | 0.02996  | 0.00000 |
| 24 | C2 | PY  | 0.00000 | 0.00000  | 0.01086  | 0.01322  | 0.00000 |
| 25 | C2 | PZ  | 0.26196 | -0.11263 | 0.00000  | 0.00000  | 0.04203 |
| 26 | C2 | S   | 0.00000 | 0.00000  | 0.42495  | -0.16914 | 0.00000 |
| 27 | C2 | PX  | 0.00000 | 0.00000  | -0.34087 | 0.25974  | 0.00000 |
| 28 | C2 | PY  | 0.00000 | 0.00000  | -0.23129 | 0.18440  | 0.00000 |
| 29 | C2 | PZ  | 0.48937 | -0.22077 | 0.00000  | 0.00000  | 0.14706 |
| 30 | C2 | DXX | 0.00000 | 0.00000  | -0.01616 | 0.00724  | 0.00000 |
| 31 | C2 | DYY | 0.00000 | 0.00000  | 0.01062  | -0.00524 | 0.00000 |
| 32 | C2 | DZZ | 0.00000 | 0.00000  | 0.00094  | 0.00010  | 0.00000 |
| 33 | C2 | DXY | 0.00000 | 0.00000  | -0.00546 | -0.00402 | 0.00000 |

|    |    |     |          |          |          |          |          |
|----|----|-----|----------|----------|----------|----------|----------|
| 34 | C2 | DXZ | -0.00993 | 0.00000  | 0.00000  | 0.00000  | -0.00783 |
| 35 | C2 | DYZ | 0.00264  | 0.03060  | 0.00000  | 0.00000  | 0.00435  |
| 36 | C3 | S   | 0.00000  | 0.00000  | -0.01492 | 0.01377  | 0.00000  |
| 37 | C3 | S   | 0.00000  | 0.00000  | 0.03500  | -0.04435 | 0.00000  |
| 38 | C3 | PX  | 0.00000  | 0.00000  | 0.00058  | 0.03641  | 0.00000  |
| 39 | C3 | PY  | 0.00000  | 0.00000  | -0.00421 | 0.04455  | 0.00000  |
| 40 | C3 | PZ  | -0.17069 | 0.21221  | 0.00000  | 0.00000  | -0.10214 |
| 41 | C3 | S   | 0.00000  | 0.00000  | 0.04757  | 0.33499  | 0.00000  |
| 42 | C3 | PX  | 0.00000  | 0.00000  | -0.04112 | -0.39441 | 0.00000  |
| 43 | C3 | PY  | 0.00000  | 0.00000  | -0.03003 | -0.10454 | 0.00000  |
| 44 | C3 | PZ  | -0.30203 | 0.41076  | 0.00000  | 0.00000  | -0.33004 |
| 45 | C3 | DXX | 0.00000  | 0.00000  | 0.00639  | 0.01384  | 0.00000  |
| 46 | C3 | DYY | 0.00000  | 0.00000  | -0.01053 | -0.00845 | 0.00000  |
| 47 | C3 | DZZ | 0.00000  | 0.00000  | 0.00254  | -0.00073 | 0.00000  |
| 48 | C3 | DXY | 0.00000  | 0.00000  | 0.01319  | -0.00908 | 0.00000  |
| 49 | C3 | DXZ | 0.02012  | 0.01384  | 0.00000  | 0.00000  | 0.02455  |
| 50 | C3 | DYZ | 0.00996  | 0.01399  | 0.00000  | 0.00000  | -0.01056 |
| 51 | C4 | S   | 0.00000  | 0.00000  | -0.04527 | -0.00636 | 0.00000  |
| 52 | C4 | S   | 0.00000  | 0.00000  | 0.04531  | -0.00040 | 0.00000  |
| 53 | C4 | PX  | 0.00000  | 0.00000  | 0.06267  | 0.02210  | 0.00000  |
| 54 | C4 | PY  | 0.00000  | 0.00000  | 0.15492  | 0.04076  | 0.00000  |
| 55 | C4 | PZ  | -0.14126 | -0.26377 | 0.00000  | 0.00000  | -0.00683 |
| 56 | C4 | S   | 0.00000  | 0.00000  | 0.93033  | 0.25155  | 0.00000  |
| 57 | C4 | PX  | 0.00000  | 0.00000  | 0.21689  | 0.00240  | 0.00000  |
| 58 | C4 | PY  | 0.00000  | 0.00000  | 0.45521  | 0.08515  | 0.00000  |
| 59 | C4 | PZ  | -0.30732 | -0.53076 | 0.00000  | 0.00000  | -0.09599 |
| 60 | C4 | DXX | 0.00000  | 0.00000  | 0.00698  | 0.00395  | 0.00000  |
| 61 | C4 | DYY | 0.00000  | 0.00000  | -0.00913 | -0.00362 | 0.00000  |
| 62 | C4 | DZZ | 0.00000  | 0.00000  | -0.00199 | -0.00099 | 0.00000  |
| 63 | C4 | DXY | 0.00000  | 0.00000  | -0.01537 | -0.00052 | 0.00000  |
| 64 | C4 | DXZ | 0.02152  | -0.01403 | 0.00000  | 0.00000  | 0.00431  |
| 65 | C4 | DYZ | -0.01436 | -0.00503 | 0.00000  | 0.00000  | -0.00041 |
| 66 | C5 | S   | 0.00000  | 0.00000  | -0.04611 | 0.00334  | 0.00000  |
| 67 | C5 | S   | 0.00000  | 0.00000  | 0.04953  | -0.00155 | 0.00000  |
| 68 | C5 | PX  | 0.00000  | 0.00000  | -0.07073 | 0.02378  | 0.00000  |
| 69 | C5 | PY  | 0.00000  | 0.00000  | 0.14039  | 0.00743  | 0.00000  |
| 70 | C5 | PZ  | -0.12642 | 0.27287  | 0.00000  | 0.00000  | 0.01416  |
| 71 | C5 | S   | 0.00000  | 0.00000  | 0.93920  | -0.25890 | 0.00000  |
| 72 | C5 | PX  | 0.00000  | 0.00000  | -0.34876 | 0.03922  | 0.00000  |
| 73 | C5 | PY  | 0.00000  | 0.00000  | 0.36817  | 0.02304  | 0.00000  |
| 74 | C5 | PZ  | -0.27144 | 0.54337  | 0.00000  | 0.00000  | -0.03630 |
| 75 | C5 | DXX | 0.00000  | 0.00000  | 0.00330  | -0.00258 | 0.00000  |
| 76 | C5 | DYY | 0.00000  | 0.00000  | -0.00560 | -0.00029 | 0.00000  |
| 77 | C5 | DZZ | 0.00000  | 0.00000  | -0.00190 | 0.00011  | 0.00000  |
| 78 | C5 | DXY | 0.00000  | 0.00000  | 0.01758  | 0.00089  | 0.00000  |
| 79 | C5 | DXZ | -0.02119 | -0.01351 | 0.00000  | 0.00000  | -0.00523 |
| 80 | C5 | DYZ | -0.01618 | 0.00424  | 0.00000  | 0.00000  | -0.00048 |
| 81 | C6 | S   | 0.00000  | 0.00000  | -0.01711 | -0.00981 | 0.00000  |
| 82 | C6 | S   | 0.00000  | 0.00000  | 0.04079  | 0.03398  | 0.00000  |
| 83 | C6 | PX  | 0.00000  | 0.00000  | 0.00547  | 0.06968  | 0.00000  |
| 84 | C6 | PY  | 0.00000  | 0.00000  | 0.00365  | 0.03766  | 0.00000  |
| 85 | C6 | PZ  | -0.17964 | -0.22291 | 0.00000  | 0.00000  | -0.08669 |
| 86 | C6 | S   | 0.00000  | 0.00000  | -0.06201 | -0.14026 | 0.00000  |
| 87 | C6 | PX  | 0.00000  | 0.00000  | 0.16129  | -0.17398 | 0.00000  |

|     |    |     |          |          |          |          |          |
|-----|----|-----|----------|----------|----------|----------|----------|
| 88  | C6 | PY  | 0.00000  | 0.00000  | 0.05871  | 0.01192  | 0.00000  |
| 89  | C6 | PZ  | -0.28144 | -0.39166 | 0.00000  | 0.00000  | -0.24812 |
| 90  | C6 | DXX | 0.00000  | 0.00000  | 0.00658  | -0.01428 | 0.00000  |
| 91  | C6 | DYY | 0.00000  | 0.00000  | -0.01692 | 0.00876  | 0.00000  |
| 92  | C6 | DZZ | 0.00000  | 0.00000  | 0.00419  | 0.00329  | 0.00000  |
| 93  | C6 | DXY | 0.00000  | 0.00000  | -0.01278 | 0.00722  | 0.00000  |
| 94  | C6 | DXZ | -0.02003 | 0.01134  | 0.00000  | 0.00000  | -0.02534 |
| 95  | C6 | DYZ | 0.00715  | -0.01579 | 0.00000  | 0.00000  | -0.01478 |
| 96  | C7 | S   | 0.00000  | 0.00000  | 0.00748  | -0.05180 | 0.00000  |
| 97  | C7 | S   | 0.00000  | 0.00000  | -0.03081 | 0.07741  | 0.00000  |
| 98  | C7 | PX  | 0.00000  | 0.00000  | 0.00183  | 0.17642  | 0.00000  |
| 99  | C7 | PY  | 0.00000  | 0.00000  | -0.04414 | -0.06416 | 0.00000  |
| 100 | C7 | PZ  | 0.05473  | -0.16151 | 0.00000  | 0.00000  | 0.22002  |
| 101 | C7 | S   | 0.00000  | 0.00000  | 0.07783  | 0.75253  | 0.00000  |
| 102 | C7 | PX  | 0.00000  | 0.00000  | -0.09838 | 1.16302  | 0.00000  |
| 103 | C7 | PY  | 0.00000  | 0.00000  | -0.16560 | -0.24931 | 0.00000  |
| 104 | C7 | PZ  | 0.13353  | -0.33716 | 0.00000  | 0.00000  | 0.64657  |
| 105 | C7 | DXX | 0.00000  | 0.00000  | 0.00003  | -0.00194 | 0.00000  |
| 106 | C7 | DYY | 0.00000  | 0.00000  | 0.00517  | -0.00149 | 0.00000  |
| 107 | C7 | DZZ | 0.00000  | 0.00000  | -0.00257 | 0.00011  | 0.00000  |
| 108 | C7 | DXY | 0.00000  | 0.00000  | -0.00268 | 0.00528  | 0.00000  |
| 109 | C7 | DXZ | -0.00123 | 0.00065  | 0.00000  | 0.00000  | 0.02833  |
| 110 | C7 | DYZ | -0.01543 | 0.01618  | 0.00000  | 0.00000  | 0.00822  |
| 111 | H3 | S   | 0.00000  | 0.00000  | -0.03340 | -0.00752 | 0.00000  |
| 112 | H3 | S   | 0.00000  | 0.00000  | -1.16585 | -0.25400 | 0.00000  |
| 113 | H3 | PX  | 0.00000  | 0.00000  | 0.00046  | 0.00087  | 0.00000  |
| 114 | H3 | PY  | 0.00000  | 0.00000  | 0.00213  | 0.00035  | 0.00000  |
| 115 | H3 | PZ  | -0.00584 | -0.01161 | 0.00000  | 0.00000  | 0.00001  |
| 116 | H4 | S   | 0.00000  | 0.00000  | -0.03575 | -0.00049 | 0.00000  |
| 117 | H4 | S   | 0.00000  | 0.00000  | -1.14216 | 0.07585  | 0.00000  |
| 118 | H4 | PX  | 0.00000  | 0.00000  | 0.00049  | 0.00091  | 0.00000  |
| 119 | H4 | PY  | 0.00000  | 0.00000  | 0.00259  | -0.00103 | 0.00000  |
| 120 | H4 | PZ  | -0.00527 | 0.01185  | 0.00000  | 0.00000  | 0.00094  |
| 121 | N1 | S   | 0.00000  | 0.00000  | 0.00525  | -0.01629 | 0.00000  |
| 122 | N1 | S   | 0.00000  | 0.00000  | -0.03111 | 0.06533  | 0.00000  |
| 123 | N1 | PX  | 0.00000  | 0.00000  | -0.01240 | 0.03128  | 0.00000  |
| 124 | N1 | PY  | 0.00000  | 0.00000  | -0.04365 | -0.03131 | 0.00000  |
| 125 | N1 | PZ  | 0.04739  | 0.18189  | 0.00000  | 0.00000  | 0.24716  |
| 126 | N1 | S   | 0.00000  | 0.00000  | 0.10210  | -0.11950 | 0.00000  |
| 127 | N1 | PX  | 0.00000  | 0.00000  | 0.01666  | -0.00917 | 0.00000  |
| 128 | N1 | PY  | 0.00000  | 0.00000  | 0.01878  | -0.01871 | 0.00000  |
| 129 | N1 | PZ  | 0.08609  | 0.28939  | 0.00000  | 0.00000  | 0.50240  |
| 130 | N1 | DXX | 0.00000  | 0.00000  | -0.00530 | 0.00422  | 0.00000  |
| 131 | N1 | DYY | 0.00000  | 0.00000  | 0.00475  | -0.00454 | 0.00000  |
| 132 | N1 | DZZ | 0.00000  | 0.00000  | -0.00459 | 0.00914  | 0.00000  |
| 133 | N1 | DXY | 0.00000  | 0.00000  | 0.00216  | 0.00450  | 0.00000  |
| 134 | N1 | DXZ | 0.00346  | 0.00820  | 0.00000  | 0.00000  | -0.00880 |
| 135 | N1 | DYZ | -0.01225 | -0.01202 | 0.00000  | 0.00000  | 0.01465  |
| 136 | H6 | S   | 0.00000  | 0.00000  | -0.03185 | 0.02282  | 0.00000  |
| 137 | H6 | S   | 0.00000  | 0.00000  | -0.72120 | 0.37490  | 0.00000  |
| 138 | H6 | PX  | 0.00000  | 0.00000  | -0.00014 | 0.00083  | 0.00000  |
| 139 | H6 | PY  | 0.00000  | 0.00000  | 0.00232  | 0.00021  | 0.00000  |
| 140 | H6 | PZ  | 0.01111  | -0.00459 | 0.00000  | 0.00000  | 0.00290  |
| 141 | C8 | S   | 0.00000  | 0.00000  | 0.00592  | 0.00830  | 0.00000  |



|     |     |     |          |          |          |          |          |
|-----|-----|-----|----------|----------|----------|----------|----------|
| 142 | C8  | S   | 0.00000  | 0.00000  | -0.00159 | -0.03694 | 0.00000  |
| 143 | C8  | PX  | 0.00000  | 0.00000  | -0.01060 | 0.03977  | 0.00000  |
| 144 | C8  | PY  | 0.00000  | 0.00000  | -0.01295 | -0.00567 | 0.00000  |
| 145 | C8  | PZ  | 0.18415  | 0.00596  | 0.00000  | 0.00000  | -0.39716 |
| 146 | C8  | S   | 0.00000  | 0.00000  | -0.19966 | 0.46109  | 0.00000  |
| 147 | C8  | PX  | 0.00000  | 0.00000  | -0.10987 | -0.03690 | 0.00000  |
| 148 | C8  | PY  | 0.00000  | 0.00000  | -0.10665 | 0.33345  | 0.00000  |
| 149 | C8  | PZ  | 0.25589  | 0.02083  | 0.00000  | 0.00000  | -0.88173 |
| 150 | C8  | DXX | 0.00000  | 0.00000  | 0.00254  | 0.00938  | 0.00000  |
| 151 | C8  | DYY | 0.00000  | 0.00000  | -0.00583 | 0.00012  | 0.00000  |
| 152 | C8  | DZZ | 0.00000  | 0.00000  | 0.00068  | -0.00168 | 0.00000  |
| 153 | C8  | DXY | 0.00000  | 0.00000  | -0.00040 | -0.01096 | 0.00000  |
| 154 | C8  | DXZ | 0.00157  | -0.02191 | 0.00000  | 0.00000  | -0.00327 |
| 155 | C8  | DYZ | 0.00926  | 0.00114  | 0.00000  | 0.00000  | -0.00096 |
| 156 | H8  | S   | 0.00000  | 0.00000  | 0.00909  | 0.00182  | 0.00000  |
| 157 | H8  | S   | 0.00000  | 0.00000  | 0.02025  | -1.66394 | 0.00000  |
| 158 | H8  | PX  | 0.00000  | 0.00000  | -0.00019 | 0.00712  | 0.00000  |
| 159 | H8  | PY  | 0.00000  | 0.00000  | -0.00338 | 0.00046  | 0.00000  |
| 160 | H8  | PZ  | 0.00271  | -0.00762 | 0.00000  | 0.00000  | 0.01494  |
| 161 | C10 | S   | 0.00000  | 0.00000  | 0.01620  | -0.07055 | 0.00000  |
| 162 | C10 | S   | 0.00000  | 0.00000  | -0.02342 | 0.07396  | 0.00000  |
| 163 | C10 | PX  | 0.00000  | 0.00000  | -0.01004 | 0.09134  | 0.00000  |
| 164 | C10 | PY  | 0.00000  | 0.00000  | 0.01628  | -0.13550 | 0.00000  |
| 165 | C10 | PZ  | -0.17567 | 0.00443  | 0.00000  | 0.00000  | 0.15246  |
| 166 | C10 | S   | 0.00000  | 0.00000  | -0.27800 | 1.35203  | 0.00000  |
| 167 | C10 | PX  | 0.00000  | 0.00000  | 0.00490  | 0.37851  | 0.00000  |
| 168 | C10 | PY  | 0.00000  | 0.00000  | 0.09909  | -0.53963 | 0.00000  |
| 169 | C10 | PZ  | -0.32249 | -0.00444 | 0.00000  | 0.00000  | 0.60364  |
| 170 | C10 | DXX | 0.00000  | 0.00000  | 0.00117  | -0.00188 | 0.00000  |
| 171 | C10 | DYY | 0.00000  | 0.00000  | 0.00065  | -0.00058 | 0.00000  |
| 172 | C10 | DZZ | 0.00000  | 0.00000  | 0.00006  | -0.00553 | 0.00000  |
| 173 | C10 | DXY | 0.00000  | 0.00000  | 0.00030  | 0.00264  | 0.00000  |
| 174 | C10 | DXZ | 0.00066  | -0.00511 | 0.00000  | 0.00000  | -0.00091 |
| 175 | C10 | DYZ | 0.01287  | 0.00050  | 0.00000  | 0.00000  | -0.03100 |
| 176 | H16 | S   | 0.00000  | 0.00000  | 0.00255  | -0.01071 | 0.00000  |
| 177 | H16 | S   | 0.00000  | 0.00000  | 0.21027  | -1.38758 | 0.00000  |
| 178 | H16 | PX  | 0.00000  | 0.00000  | 0.00002  | 0.00046  | 0.00000  |
| 179 | H16 | PY  | 0.00000  | 0.00000  | 0.00088  | -0.00607 | 0.00000  |
| 180 | H16 | PZ  | -0.00779 | -0.00071 | 0.00000  | 0.00000  | 0.01053  |
| 181 | H18 | S   | 0.00000  | 0.00000  | 0.00466  | -0.01850 | 0.00000  |
| 182 | H18 | S   | 0.00000  | 0.00000  | 0.15677  | -0.48527 | 0.00000  |
| 183 | H18 | PX  | 0.00000  | 0.00000  | 0.00010  | -0.00008 | 0.00000  |
| 184 | H18 | PY  | 0.00000  | 0.00000  | 0.00078  | -0.00263 | 0.00000  |
| 185 | H18 | PZ  | -0.00750 | 0.00111  | 0.00000  | 0.00000  | 0.00927  |

|              |         |         |         |         |         |
|--------------|---------|---------|---------|---------|---------|
| MO:          | 41      | 42      | 43      | 44      | 45      |
| Eigenvalues: | 0.28500 | 0.30257 | 0.30727 | 0.32265 | 0.33518 |
| (ev):        | 7.75532 | 8.23342 | 8.36138 | 8.77967 | 9.12063 |

|   |    |    |          |          |          |          |          |
|---|----|----|----------|----------|----------|----------|----------|
|   |    | A  | A        | A        | A        | A        |          |
| 1 | H1 | S  | 0.00799  | 0.00866  | -0.03099 | -0.00037 | -0.03005 |
| 2 | H1 | S  | 1.17798  | 0.99575  | 0.44056  | 1.23137  | -0.56069 |
| 3 | H1 | PX | -0.00475 | -0.00306 | -0.00441 | -0.00508 | -0.00169 |
| 4 | H1 | PY | 0.00154  | 0.00169  | -0.00192 | 0.00305  | 0.00326  |

|    |    |     |          |          |          |          |          |
|----|----|-----|----------|----------|----------|----------|----------|
| 5  | H1 | PZ  | 0.00000  | 0.00000  | 0.00000  | 0.00000  | 0.00000  |
| 6  | C1 | S   | 0.03540  | 0.04276  | 0.02824  | 0.06147  | -0.02673 |
| 7  | C1 | S   | -0.02874 | -0.05267 | -0.05562 | -0.09565 | 0.04213  |
| 8  | C1 | PX  | -0.15265 | -0.10217 | -0.01008 | -0.08987 | 0.03722  |
| 9  | C1 | PY  | -0.00557 | 0.03632  | 0.00883  | 0.01148  | 0.02527  |
| 10 | C1 | PZ  | 0.00000  | 0.00000  | 0.00000  | 0.00000  | 0.00000  |
| 11 | C1 | S   | -0.83763 | -0.78626 | -0.40716 | -0.96621 | 0.02162  |
| 12 | C1 | PX  | -0.67752 | -0.59581 | -0.29920 | -0.69891 | 0.40215  |
| 13 | C1 | PY  | -0.14190 | 0.13193  | -0.53840 | -0.32873 | 0.31442  |
| 14 | C1 | PZ  | 0.00000  | 0.00000  | 0.00000  | 0.00000  | 0.00000  |
| 15 | C1 | DXX | 0.00191  | 0.00073  | -0.01292 | -0.00805 | -0.00867 |
| 16 | C1 | DYY | -0.00217 | 0.00213  | 0.01092  | 0.01001  | -0.00079 |
| 17 | C1 | DZZ | 0.00305  | -0.00021 | -0.00076 | -0.00160 | -0.00152 |
| 18 | C1 | DXY | 0.00477  | 0.00129  | -0.00450 | 0.00460  | 0.00741  |
| 19 | C1 | DXZ | 0.00000  | 0.00000  | 0.00000  | 0.00000  | 0.00000  |
| 20 | C1 | DYZ | 0.00000  | 0.00000  | 0.00000  | 0.00000  | 0.00000  |
| 21 | C2 | S   | -0.02702 | -0.02619 | 0.01725  | 0.06256  | 0.05613  |
| 22 | C2 | S   | 0.02331  | 0.02096  | 0.00198  | -0.09402 | -0.08054 |
| 23 | C2 | PX  | -0.12607 | -0.10579 | 0.08517  | 0.08277  | 0.11007  |
| 24 | C2 | PY  | -0.00589 | -0.01663 | -0.00227 | 0.03404  | -0.03648 |
| 25 | C2 | PZ  | 0.00000  | 0.00000  | 0.00000  | 0.00000  | 0.00000  |
| 26 | C2 | S   | 0.57893  | 0.61987  | -0.59769 | -1.06597 | -0.58610 |
| 27 | C2 | PX  | -0.56078 | -0.49113 | 0.20803  | 0.76586  | 0.98185  |
| 28 | C2 | PY  | -0.26313 | -0.05574 | 0.01595  | 0.01985  | -0.40606 |
| 29 | C2 | PZ  | 0.00000  | 0.00000  | 0.00000  | 0.00000  | 0.00000  |
| 30 | C2 | DXX | -0.00960 | 0.00008  | 0.00016  | -0.00615 | 0.00092  |
| 31 | C2 | DYY | 0.00828  | -0.00009 | -0.00411 | 0.00632  | 0.00597  |
| 32 | C2 | DZZ | -0.00183 | -0.00133 | 0.00287  | -0.00156 | 0.00173  |
| 33 | C2 | DXY | -0.00068 | -0.00252 | -0.00574 | -0.00821 | 0.00778  |
| 34 | C2 | DXZ | 0.00000  | 0.00000  | 0.00000  | 0.00000  | 0.00000  |
| 35 | C2 | DYZ | 0.00000  | 0.00000  | 0.00000  | 0.00000  | 0.00000  |
| 36 | C3 | S   | -0.00572 | -0.00822 | 0.00809  | -0.00236 | -0.00847 |
| 37 | C3 | S   | 0.04237  | 0.02915  | 0.02856  | -0.01607 | -0.00717 |
| 38 | C3 | PX  | -0.08107 | 0.03135  | 0.04570  | 0.04318  | 0.02018  |
| 39 | C3 | PY  | 0.04875  | 0.02880  | -0.00942 | 0.09957  | -0.00697 |
| 40 | C3 | PZ  | 0.00000  | 0.00000  | 0.00000  | 0.00000  | 0.00000  |
| 41 | C3 | S   | -0.61084 | 0.01899  | -1.10983 | 0.00024  | 0.57414  |
| 42 | C3 | PX  | -0.00101 | 0.41837  | 0.16011  | -0.18569 | 0.11586  |
| 43 | C3 | PY  | 0.19964  | -0.12814 | 0.16273  | -0.06444 | 0.02935  |
| 44 | C3 | PZ  | 0.00000  | 0.00000  | 0.00000  | 0.00000  | 0.00000  |
| 45 | C3 | DXX | -0.01179 | -0.00156 | 0.00749  | 0.00372  | 0.00033  |
| 46 | C3 | DYY | 0.00421  | -0.00356 | -0.02218 | -0.00976 | 0.00840  |
| 47 | C3 | DZZ | 0.00387  | 0.00342  | 0.00268  | 0.00055  | -0.00273 |
| 48 | C3 | DXY | 0.00299  | -0.01321 | -0.00085 | -0.01833 | 0.00029  |
| 49 | C3 | DXZ | 0.00000  | 0.00000  | 0.00000  | 0.00000  | 0.00000  |
| 50 | C3 | DYZ | 0.00000  | 0.00000  | 0.00000  | 0.00000  | 0.00000  |
| 51 | C4 | S   | 0.00381  | 0.00864  | -0.06001 | -0.04267 | 0.07438  |
| 52 | C4 | S   | 0.00790  | 0.01060  | 0.06702  | 0.03234  | -0.10474 |
| 53 | C4 | PX  | -0.02800 | -0.02206 | 0.06570  | 0.05630  | 0.04867  |
| 54 | C4 | PY  | -0.02871 | -0.05888 | 0.07736  | 0.08485  | -0.06997 |
| 55 | C4 | PZ  | 0.00000  | 0.00000  | 0.00000  | 0.00000  | 0.00000  |
| 56 | C4 | S   | -0.20762 | -0.52045 | 1.23326  | 0.99372  | -0.96099 |
| 57 | C4 | PX  | 0.24482  | 0.14788  | 0.51336  | 0.52878  | -0.08331 |
| 58 | C4 | PY  | -0.12100 | -0.20440 | 0.56097  | 0.38507  | -0.80207 |

|     |    |     |          |          |          |          |          |
|-----|----|-----|----------|----------|----------|----------|----------|
| 59  | C4 | PZ  | 0.00000  | 0.00000  | 0.00000  | 0.00000  | 0.00000  |
| 60  | C4 | DXX | -0.00675 | -0.00293 | -0.00086 | 0.00173  | 0.01666  |
| 61  | C4 | DYY | 0.00584  | -0.00079 | 0.00337  | 0.00272  | -0.00847 |
| 62  | C4 | DZZ | 0.00114  | 0.00191  | -0.00270 | -0.00459 | -0.00068 |
| 63  | C4 | DXY | -0.00292 | -0.00232 | 0.00303  | 0.00815  | -0.00435 |
| 64  | C4 | DXZ | 0.00000  | 0.00000  | 0.00000  | 0.00000  | 0.00000  |
| 65  | C4 | DYZ | 0.00000  | 0.00000  | 0.00000  | 0.00000  | 0.00000  |
| 66  | C5 | S   | -0.02905 | -0.01341 | 0.02101  | -0.02621 | -0.09455 |
| 67  | C5 | S   | 0.01073  | -0.00638 | -0.04052 | 0.01494  | 0.12020  |
| 68  | C5 | PX  | -0.08554 | -0.02802 | -0.01063 | -0.06617 | -0.00075 |
| 69  | C5 | PY  | 0.09442  | 0.07861  | -0.01870 | 0.06119  | 0.10652  |
| 70  | C5 | PZ  | 0.00000  | 0.00000  | 0.00000  | 0.00000  | 0.00000  |
| 71  | C5 | S   | 0.99007  | 0.55696  | -0.08919 | 0.58773  | 1.39400  |
| 72  | C5 | PX  | -0.14185 | 0.08983  | -0.06111 | -0.46232 | -0.45414 |
| 73  | C5 | PY  | 0.36353  | 0.28858  | -0.30672 | 0.24852  | 0.96058  |
| 74  | C5 | PZ  | 0.00000  | 0.00000  | 0.00000  | 0.00000  | 0.00000  |
| 75  | C5 | DXX | 0.00866  | 0.00584  | 0.00278  | 0.00537  | -0.01570 |
| 76  | C5 | DYY | -0.00259 | -0.00238 | 0.00274  | -0.00149 | 0.00884  |
| 77  | C5 | DZZ | -0.00360 | -0.00259 | -0.00190 | -0.00431 | -0.00175 |
| 78  | C5 | DXY | 0.00007  | -0.00271 | -0.00048 | -0.00661 | -0.01199 |
| 79  | C5 | DXZ | 0.00000  | 0.00000  | 0.00000  | 0.00000  | 0.00000  |
| 80  | C5 | DYZ | 0.00000  | 0.00000  | 0.00000  | 0.00000  | 0.00000  |
| 81  | C6 | S   | 0.01593  | -0.00646 | -0.00535 | -0.02255 | 0.00531  |
| 82  | C6 | S   | -0.04478 | -0.00393 | -0.01803 | 0.04251  | 0.00166  |
| 83  | C6 | PX  | -0.05883 | 0.01224  | 0.05113  | -0.04062 | -0.00273 |
| 84  | C6 | PY  | 0.01084  | -0.01095 | 0.06075  | 0.05811  | 0.02304  |
| 85  | C6 | PZ  | 0.00000  | 0.00000  | 0.00000  | 0.00000  | 0.00000  |
| 86  | C6 | S   | -0.13143 | 0.30601  | 0.37854  | 0.07653  | -0.48738 |
| 87  | C6 | PX  | 0.18084  | 0.41041  | 0.16578  | -0.27909 | -0.00303 |
| 88  | C6 | PY  | 0.06595  | 0.11015  | 0.04905  | -0.09925 | -0.21228 |
| 89  | C6 | PZ  | 0.00000  | 0.00000  | 0.00000  | 0.00000  | 0.00000  |
| 90  | C6 | DXX | 0.01588  | -0.00060 | -0.00206 | -0.00675 | -0.00336 |
| 91  | C6 | DYY | -0.01606 | 0.00218  | 0.01189  | -0.00106 | -0.00474 |
| 92  | C6 | DZZ | -0.00240 | -0.00065 | -0.00281 | 0.00211  | 0.00070  |
| 93  | C6 | DXY | -0.00118 | 0.00036  | -0.00181 | 0.02064  | 0.00127  |
| 94  | C6 | DXZ | 0.00000  | 0.00000  | 0.00000  | 0.00000  | 0.00000  |
| 95  | C6 | DYZ | 0.00000  | 0.00000  | 0.00000  | 0.00000  | 0.00000  |
| 96  | C7 | S   | 0.00662  | -0.01502 | 0.06742  | -0.02984 | 0.02931  |
| 97  | C7 | S   | -0.01287 | -0.00308 | -0.13624 | 0.05226  | -0.01206 |
| 98  | C7 | PX  | -0.06339 | 0.13039  | -0.07280 | 0.06043  | -0.02195 |
| 99  | C7 | PY  | 0.00581  | 0.00930  | 0.07957  | -0.04375 | 0.05133  |
| 100 | C7 | PZ  | 0.00000  | 0.00000  | 0.00000  | 0.00000  | 0.00000  |
| 101 | C7 | S   | -0.00441 | 0.44058  | -0.61198 | 0.22009  | -0.56690 |
| 102 | C7 | PX  | -0.35485 | 0.41643  | -0.63964 | 0.63772  | -0.11907 |
| 103 | C7 | PY  | 0.45472  | -0.37298 | 0.78114  | 0.10672  | -0.09171 |
| 104 | C7 | PZ  | 0.00000  | 0.00000  | 0.00000  | 0.00000  | 0.00000  |
| 105 | C7 | DXX | 0.01218  | -0.01266 | 0.00060  | -0.01069 | 0.00311  |
| 106 | C7 | DYY | -0.00859 | 0.00986  | 0.01334  | -0.00433 | -0.00112 |
| 107 | C7 | DZZ | -0.00039 | -0.00200 | -0.00854 | 0.00543  | 0.00293  |
| 108 | C7 | DXY | -0.00494 | 0.00956  | 0.01318  | 0.00958  | 0.00246  |
| 109 | C7 | DXZ | 0.00000  | 0.00000  | 0.00000  | 0.00000  | 0.00000  |
| 110 | C7 | DYZ | 0.00000  | 0.00000  | 0.00000  | 0.00000  | 0.00000  |
| 111 | H3 | S   | 0.00291  | -0.00956 | -0.00162 | 0.00970  | 0.00622  |
| 112 | H3 | S   | 0.16063  | 0.35112  | -1.25032 | -1.01261 | 1.19815  |

|     |     |     |          |          |          |          |          |
|-----|-----|-----|----------|----------|----------|----------|----------|
| 113 | H3  | PX  | -0.00235 | -0.00126 | 0.00162  | 0.00450  | 0.00363  |
| 114 | H3  | PY  | 0.00068  | -0.00216 | 0.00599  | 0.00365  | -0.00644 |
| 115 | H3  | PZ  | 0.00000  | 0.00000  | 0.00000  | 0.00000  | 0.00000  |
| 116 | H4  | S   | -0.00441 | 0.00390  | 0.01311  | 0.00802  | 0.00534  |
| 117 | H4  | S   | -0.88499 | -0.49922 | 0.34001  | -0.73197 | -1.67065 |
| 118 | H4  | PX  | -0.00385 | -0.00266 | -0.00187 | -0.00558 | 0.00041  |
| 119 | H4  | PY  | 0.00294  | 0.00145  | -0.00113 | 0.00069  | 0.00780  |
| 120 | H4  | PZ  | 0.00000  | 0.00000  | 0.00000  | 0.00000  | 0.00000  |
| 121 | N1  | S   | 0.00135  | -0.01409 | -0.01249 | 0.01606  | 0.00685  |
| 122 | N1  | S   | -0.02004 | 0.05348  | 0.02271  | -0.02194 | -0.00947 |
| 123 | N1  | PX  | -0.06232 | 0.08820  | -0.00123 | 0.00796  | 0.02576  |
| 124 | N1  | PY  | -0.00006 | -0.04900 | -0.02375 | 0.05074  | -0.00605 |
| 125 | N1  | PZ  | 0.00000  | 0.00000  | 0.00000  | 0.00000  | 0.00000  |
| 126 | N1  | S   | 0.15635  | -0.00162 | 0.14231  | -0.22057 | -0.20549 |
| 127 | N1  | PX  | -0.02834 | -0.00065 | -0.02460 | -0.01737 | -0.10678 |
| 128 | N1  | PY  | 0.10153  | 0.05758  | -0.05282 | -0.03908 | 0.08615  |
| 129 | N1  | PZ  | 0.00000  | 0.00000  | 0.00000  | 0.00000  | 0.00000  |
| 130 | N1  | DXX | -0.00091 | -0.00105 | 0.00745  | -0.00223 | 0.00115  |
| 131 | N1  | DYY | 0.00289  | 0.00049  | -0.01987 | 0.00669  | -0.00377 |
| 132 | N1  | DZZ | -0.00383 | 0.00632  | 0.00223  | 0.00334  | -0.00007 |
| 133 | N1  | DXY | -0.00977 | 0.00977  | -0.00069 | -0.00848 | -0.00024 |
| 134 | N1  | DXZ | 0.00000  | 0.00000  | 0.00000  | 0.00000  | 0.00000  |
| 135 | N1  | DYZ | 0.00000  | 0.00000  | 0.00000  | 0.00000  | 0.00000  |
| 136 | H6  | S   | -0.02758 | 0.00489  | -0.00228 | 0.00144  | 0.02101  |
| 137 | H6  | S   | -0.96317 | -0.80302 | 0.54869  | 1.26812  | 1.37537  |
| 138 | H6  | PX  | -0.00251 | -0.00313 | 0.00244  | 0.00587  | 0.00360  |
| 139 | H6  | PY  | -0.00009 | 0.00057  | 0.00263  | 0.00304  | -0.00384 |
| 140 | H6  | PZ  | 0.00000  | 0.00000  | 0.00000  | 0.00000  | 0.00000  |
| 141 | C8  | S   | -0.01209 | 0.00670  | -0.02425 | -0.02611 | -0.00886 |
| 142 | C8  | S   | 0.01755  | -0.01756 | 0.02883  | 0.02386  | 0.01377  |
| 143 | C8  | PX  | -0.01920 | 0.07574  | 0.13763  | -0.04581 | 0.00792  |
| 144 | C8  | PY  | 0.06287  | -0.05238 | 0.06167  | 0.00187  | 0.03177  |
| 145 | C8  | PZ  | 0.00000  | 0.00000  | 0.00000  | 0.00000  | 0.00000  |
| 146 | C8  | S   | 0.30986  | 0.00530  | 0.36638  | 0.69856  | 0.08620  |
| 147 | C8  | PX  | 0.06976  | -0.36001 | 0.16273  | 0.31456  | -0.16297 |
| 148 | C8  | PY  | -0.17749 | 0.00909  | -0.24374 | 0.01348  | 0.21827  |
| 149 | C8  | PZ  | 0.00000  | 0.00000  | 0.00000  | 0.00000  | 0.00000  |
| 150 | C8  | DXX | -0.00786 | 0.01267  | -0.00934 | 0.00629  | -0.00191 |
| 151 | C8  | DYY | 0.00411  | -0.00456 | 0.00685  | -0.00680 | 0.00463  |
| 152 | C8  | DZZ | 0.00194  | -0.00337 | -0.00032 | 0.00018  | 0.00038  |
| 153 | C8  | DXY | 0.01172  | -0.03070 | -0.01973 | 0.01503  | -0.01037 |
| 154 | C8  | DXZ | 0.00000  | 0.00000  | 0.00000  | 0.00000  | 0.00000  |
| 155 | C8  | DYZ | 0.00000  | 0.00000  | 0.00000  | 0.00000  | 0.00000  |
| 156 | H8  | S   | 0.03048  | -0.04162 | -0.00957 | -0.04395 | 0.01847  |
| 157 | H8  | S   | 0.57578  | -0.87748 | 1.32511  | -0.80256 | 0.42538  |
| 158 | H8  | PX  | 0.00101  | 0.00151  | -0.00121 | -0.00228 | 0.00107  |
| 159 | H8  | PY  | 0.00344  | 0.00346  | 0.00582  | 0.00044  | 0.00229  |
| 160 | H8  | PZ  | 0.00000  | 0.00000  | 0.00000  | 0.00000  | 0.00000  |
| 161 | C10 | S   | -0.07105 | 0.05218  | -0.01587 | 0.03459  | -0.00596 |
| 162 | C10 | S   | 0.08612  | -0.06157 | 0.02311  | -0.03009 | 0.00047  |
| 163 | C10 | PX  | -0.03499 | 0.20167  | 0.17336  | -0.11671 | 0.07068  |
| 164 | C10 | PY  | -0.12007 | 0.05928  | -0.04792 | 0.03334  | -0.01196 |
| 165 | C10 | PZ  | 0.00000  | 0.00000  | 0.00000  | 0.00000  | 0.00000  |
| 166 | C10 | S   | 0.98993  | -0.83964 | 0.00876  | -0.62913 | 0.21559  |

|     |     |     |          |          |          |          |          |
|-----|-----|-----|----------|----------|----------|----------|----------|
| 167 | C10 | PX  | -0.24665 | 1.09187  | 0.80702  | -0.71069 | 0.41381  |
| 168 | C10 | PY  | -0.57969 | 0.19726  | -0.29199 | -0.01223 | 0.02498  |
| 169 | C10 | PZ  | 0.00000  | 0.00000  | 0.00000  | 0.00000  | 0.00000  |
| 170 | C10 | DXX | -0.00739 | 0.00642  | -0.00323 | -0.00118 | -0.00054 |
| 171 | C10 | DYY | -0.00199 | -0.00060 | -0.00495 | 0.00335  | -0.00138 |
| 172 | C10 | DZZ | -0.00247 | 0.00148  | 0.00100  | 0.00308  | 0.00001  |
| 173 | C10 | DXY | -0.00519 | 0.01185  | 0.01227  | -0.00803 | 0.00400  |
| 174 | C10 | DXZ | 0.00000  | 0.00000  | 0.00000  | 0.00000  | 0.00000  |
| 175 | C10 | DYZ | 0.00000  | 0.00000  | 0.00000  | 0.00000  | 0.00000  |
| 176 | H16 | S   | -0.00265 | -0.01034 | -0.03875 | 0.02515  | -0.01248 |
| 177 | H16 | S   | -0.68886 | -0.50302 | -1.12812 | 0.99122  | -0.46176 |
| 178 | H16 | PX  | -0.00261 | 0.00458  | 0.00156  | -0.00217 | 0.00127  |
| 179 | H16 | PY  | -0.00261 | 0.00039  | 0.00123  | -0.00114 | 0.00047  |
| 180 | H16 | PZ  | 0.00000  | 0.00000  | 0.00000  | 0.00000  | 0.00000  |
| 181 | H18 | S   | -0.03261 | 0.03781  | 0.02639  | -0.01463 | 0.00813  |
| 182 | H18 | S   | -1.10230 | 1.68880  | 0.72991  | -0.41110 | 0.36028  |
| 183 | H18 | PX  | -0.00006 | 0.00258  | 0.00467  | -0.00247 | 0.00155  |
| 184 | H18 | PY  | -0.00217 | 0.00199  | -0.00086 | -0.00014 | -0.00087 |
| 185 | H18 | PZ  | 0.00000  | 0.00000  | 0.00000  | 0.00000  | 0.00000  |

|              |          |          |          |          |          |
|--------------|----------|----------|----------|----------|----------|
| MO:          | 46       | 47       | 48       | 49       | 50       |
| Eigenvalues: | 0.37743  | 0.40578  | 0.43114  | 0.44063  | 0.47847  |
| (ev):        | 10.27040 | 11.04189 | 11.73184 | 11.99020 | 13.01975 |

|    |    |     |          |          |          |          |          |
|----|----|-----|----------|----------|----------|----------|----------|
|    |    | A   | A        | A        | A        | A        |          |
| 1  | H1 | S   | 0.00000  | 0.02203  | -0.06158 | -0.07220 | 0.07146  |
| 2  | H1 | S   | 0.00000  | 0.71283  | -0.28327 | 0.08502  | -0.05349 |
| 3  | H1 | PX  | 0.00000  | -0.00276 | -0.00416 | -0.00524 | 0.00551  |
| 4  | H1 | PY  | 0.00000  | 0.00835  | 0.01169  | -0.00034 | 0.01018  |
| 5  | H1 | PZ  | -0.01428 | 0.00000  | 0.00000  | 0.00000  | 0.00000  |
| 6  | C1 | S   | 0.00000  | 0.02755  | 0.03317  | 0.04028  | -0.02248 |
| 7  | C1 | S   | 0.00000  | 0.00717  | -0.07451 | -0.00932 | 0.01741  |
| 8  | C1 | PX  | 0.00000  | -0.02354 | 0.08946  | 0.01815  | -0.01263 |
| 9  | C1 | PY  | 0.00000  | -0.01216 | 0.10950  | 0.05654  | 0.11001  |
| 10 | C1 | PZ  | -0.19480 | 0.00000  | 0.00000  | 0.00000  | 0.00000  |
| 11 | C1 | S   | 0.00000  | -0.55673 | -0.69026 | -1.35810 | 1.10520  |
| 12 | C1 | PX  | 0.00000  | -0.64941 | 0.33061  | 0.27918  | -0.27466 |
| 13 | C1 | PY  | 0.00000  | 1.38673  | 0.22291  | -0.11647 | 1.32139  |
| 14 | C1 | PZ  | -0.63665 | 0.00000  | 0.00000  | 0.00000  | 0.00000  |
| 15 | C1 | DXX | 0.00000  | -0.00162 | -0.02128 | -0.02449 | 0.02217  |
| 16 | C1 | DYY | 0.00000  | 0.00582  | 0.02345  | 0.01821  | -0.00825 |
| 17 | C1 | DZZ | 0.00000  | 0.00436  | -0.00798 | 0.00272  | -0.00162 |
| 18 | C1 | DXY | 0.00000  | 0.02001  | 0.01645  | -0.00689 | 0.02129  |
| 19 | C1 | DXZ | -0.01838 | 0.00000  | 0.00000  | 0.00000  | 0.00000  |
| 20 | C1 | DYZ | -0.00658 | 0.00000  | 0.00000  | 0.00000  | 0.00000  |
| 21 | C2 | S   | 0.00000  | -0.02244 | -0.02253 | -0.02212 | -0.00468 |
| 22 | C2 | S   | 0.00000  | 0.03669  | 0.00982  | 0.03383  | 0.02920  |
| 23 | C2 | PX  | 0.00000  | 0.08397  | -0.04145 | 0.00715  | 0.04118  |
| 24 | C2 | PY  | 0.00000  | -0.06694 | -0.01439 | -0.04287 | 0.09384  |
| 25 | C2 | PZ  | 0.21091  | 0.00000  | 0.00000  | 0.00000  | 0.00000  |
| 26 | C2 | S   | 0.00000  | 0.21522  | 0.71437  | 0.59938  | 0.13116  |
| 27 | C2 | PX  | 0.00000  | 0.21485  | -0.62489 | -0.03552 | 0.20370  |
| 28 | C2 | PY  | 0.00000  | -0.67785 | -0.80795 | 0.83916  | 1.32769  |
| 29 | C2 | PZ  | 0.65261  | 0.00000  | 0.00000  | 0.00000  | 0.00000  |

|    |    |     |          |          |          |          |          |
|----|----|-----|----------|----------|----------|----------|----------|
| 30 | C2 | DXX | 0.00000  | 0.00025  | 0.02378  | 0.02850  | 0.00840  |
| 31 | C2 | DYY | 0.00000  | -0.00394 | -0.01949 | -0.02359 | 0.01221  |
| 32 | C2 | DZZ | 0.00000  | 0.00175  | -0.00008 | 0.00102  | -0.00447 |
| 33 | C2 | DXY | 0.00000  | 0.01831  | 0.01511  | -0.00962 | -0.02068 |
| 34 | C2 | DXZ | -0.01981 | 0.00000  | 0.00000  | 0.00000  | 0.00000  |
| 35 | C2 | DYZ | 0.00604  | 0.00000  | 0.00000  | 0.00000  | 0.00000  |
| 36 | C3 | S   | 0.00000  | -0.08716 | -0.03537 | -0.00414 | -0.03263 |
| 37 | C3 | S   | 0.00000  | 0.12396  | 0.06332  | 0.00244  | 0.07049  |
| 38 | C3 | PX  | 0.00000  | 0.00108  | 0.01474  | 0.21186  | 0.00868  |
| 39 | C3 | PY  | 0.00000  | 0.03647  | 0.15579  | -0.03466 | 0.03092  |
| 40 | C3 | PZ  | 0.31189  | 0.00000  | 0.00000  | 0.00000  | 0.00000  |
| 41 | C3 | S   | 0.00000  | 2.05302  | -0.47711 | 0.33672  | 0.45070  |
| 42 | C3 | PX  | 0.00000  | 0.74814  | -0.02999 | 0.99098  | -0.00143 |
| 43 | C3 | PY  | 0.00000  | 0.37227  | 0.97884  | -0.23654 | 0.25237  |
| 44 | C3 | PZ  | 0.74677  | 0.00000  | 0.00000  | 0.00000  | 0.00000  |
| 45 | C3 | DXX | 0.00000  | -0.02446 | 0.01186  | 0.02544  | -0.01446 |
| 46 | C3 | DYY | 0.00000  | 0.03159  | -0.03087 | -0.01488 | 0.02660  |
| 47 | C3 | DZZ | 0.00000  | 0.00499  | 0.00686  | -0.00464 | 0.00045  |
| 48 | C3 | DXY | 0.00000  | 0.00614  | -0.00585 | -0.00418 | -0.02286 |
| 49 | C3 | DXZ | 0.01175  | 0.00000  | 0.00000  | 0.00000  | 0.00000  |
| 50 | C3 | DYZ | -0.00786 | 0.00000  | 0.00000  | 0.00000  | 0.00000  |
| 51 | C4 | S   | 0.00000  | 0.02604  | 0.04491  | -0.00329 | 0.02402  |
| 52 | C4 | S   | 0.00000  | -0.02176 | -0.02289 | -0.00148 | -0.03130 |
| 53 | C4 | PX  | 0.00000  | 0.08967  | 0.14794  | 0.07073  | -0.09141 |
| 54 | C4 | PY  | 0.00000  | 0.14687  | 0.01491  | -0.07605 | 0.09528  |
| 55 | C4 | PZ  | 0.19442  | 0.00000  | 0.00000  | 0.00000  | 0.00000  |
| 56 | C4 | S   | 0.00000  | -1.18641 | -1.06207 | 0.06705  | -1.08840 |
| 57 | C4 | PX  | 0.00000  | 0.35845  | 1.25299  | 0.55265  | -1.10802 |
| 58 | C4 | PY  | 0.00000  | 1.02308  | 0.12663  | -0.85952 | 0.69293  |
| 59 | C4 | PZ  | 0.56991  | 0.00000  | 0.00000  | 0.00000  | 0.00000  |
| 60 | C4 | DXX | 0.00000  | 0.00569  | 0.01884  | 0.01331  | -0.00590 |
| 61 | C4 | DYY | 0.00000  | -0.01382 | -0.02080 | -0.01262 | -0.00060 |
| 62 | C4 | DZZ | 0.00000  | -0.00167 | 0.00030  | -0.00331 | -0.00132 |
| 63 | C4 | DXY | 0.00000  | 0.00988  | 0.00194  | -0.00993 | -0.01684 |
| 64 | C4 | DXZ | 0.00304  | 0.00000  | 0.00000  | 0.00000  | 0.00000  |
| 65 | C4 | DYZ | 0.01146  | 0.00000  | 0.00000  | 0.00000  | 0.00000  |
| 66 | C5 | S   | 0.00000  | -0.02520 | -0.04724 | 0.00527  | 0.04578  |
| 67 | C5 | S   | 0.00000  | 0.02597  | 0.01553  | 0.00157  | -0.02041 |
| 68 | C5 | PX  | 0.00000  | 0.09352  | 0.16933  | 0.10098  | -0.01391 |
| 69 | C5 | PY  | 0.00000  | -0.06434 | -0.05679 | 0.10564  | 0.08705  |
| 70 | C5 | PZ  | -0.19384 | 0.00000  | 0.00000  | 0.00000  | 0.00000  |
| 71 | C5 | S   | 0.00000  | 0.70895  | 1.65080  | -0.29851 | -1.69517 |
| 72 | C5 | PX  | 0.00000  | 0.48677  | 1.17023  | 0.61760  | 0.06408  |
| 73 | C5 | PY  | 0.00000  | -0.50147 | -0.53671 | 0.85357  | 0.72094  |
| 74 | C5 | PZ  | -0.58077 | 0.00000  | 0.00000  | 0.00000  | 0.00000  |
| 75 | C5 | DXX | 0.00000  | -0.01171 | -0.01063 | -0.00672 | -0.00248 |
| 76 | C5 | DYY | 0.00000  | 0.01582  | 0.01797  | 0.00674  | -0.00424 |
| 77 | C5 | DZZ | 0.00000  | 0.00183  | -0.00113 | 0.00284  | 0.00076  |
| 78 | C5 | DXY | 0.00000  | 0.00413  | -0.00099 | -0.00901 | 0.01585  |
| 79 | C5 | DXZ | 0.00251  | 0.00000  | 0.00000  | 0.00000  | 0.00000  |
| 80 | C5 | DYZ | -0.01221 | 0.00000  | 0.00000  | 0.00000  | 0.00000  |
| 81 | C6 | S   | 0.00000  | 0.07146  | 0.03782  | -0.02752 | 0.00459  |
| 82 | C6 | S   | 0.00000  | -0.08511 | -0.08813 | 0.07879  | 0.03061  |
| 83 | C6 | PX  | 0.00000  | -0.10231 | 0.10608  | 0.17000  | -0.16029 |

|     |    |     |          |          |          |          |          |
|-----|----|-----|----------|----------|----------|----------|----------|
| 84  | C6 | PY  | 0.00000  | -0.10702 | -0.04346 | 0.03679  | 0.15100  |
| 85  | C6 | PZ  | -0.33580 | 0.00000  | 0.00000  | 0.00000  | 0.00000  |
| 86  | C6 | S   | 0.00000  | -0.96912 | -0.72554 | 0.66524  | -0.42126 |
| 87  | C6 | PX  | 0.00000  | 0.10435  | 0.72150  | 0.40233  | -0.33823 |
| 88  | C6 | PY  | 0.00000  | -0.46621 | -0.38791 | 0.86069  | 1.26540  |
| 89  | C6 | PZ  | -0.75535 | 0.00000  | 0.00000  | 0.00000  | 0.00000  |
| 90  | C6 | DXX | 0.00000  | 0.00945  | 0.00395  | -0.01867 | 0.00208  |
| 91  | C6 | DYY | 0.00000  | 0.00358  | -0.00597 | 0.02760  | 0.00352  |
| 92  | C6 | DZZ | 0.00000  | -0.00689 | -0.00750 | 0.00328  | -0.00634 |
| 93  | C6 | DXY | 0.00000  | -0.00347 | 0.01566  | -0.00283 | 0.01525  |
| 94  | C6 | DXZ | 0.00347  | 0.00000  | 0.00000  | 0.00000  | 0.00000  |
| 95  | C6 | DYZ | 0.00282  | 0.00000  | 0.00000  | 0.00000  | 0.00000  |
| 96  | C7 | S   | 0.00000  | -0.01208 | 0.03305  | 0.02804  | -0.01872 |
| 97  | C7 | S   | 0.00000  | 0.01324  | -0.07798 | -0.02182 | 0.07032  |
| 98  | C7 | PX  | 0.00000  | -0.03399 | 0.09746  | -0.03045 | -0.02235 |
| 99  | C7 | PY  | 0.00000  | -0.01820 | -0.01245 | -0.03860 | 0.10874  |
| 100 | C7 | PZ  | -0.06172 | 0.00000  | 0.00000  | 0.00000  | 0.00000  |
| 101 | C7 | S   | 0.00000  | 0.33061  | 0.21031  | -1.14062 | 0.46981  |
| 102 | C7 | PX  | 0.00000  | -0.78184 | 0.11618  | -0.19394 | -1.14574 |
| 103 | C7 | PY  | 0.00000  | -1.36436 | 1.15215  | -0.29771 | 0.30450  |
| 104 | C7 | PZ  | -0.40299 | 0.00000  | 0.00000  | 0.00000  | 0.00000  |
| 105 | C7 | DXX | 0.00000  | -0.00615 | 0.00499  | -0.02960 | 0.00405  |
| 106 | C7 | DYY | 0.00000  | 0.00418  | 0.00128  | 0.02700  | 0.00649  |
| 107 | C7 | DZZ | 0.00000  | 0.00185  | -0.00308 | -0.00388 | 0.00260  |
| 108 | C7 | DXY | 0.00000  | -0.01964 | 0.01486  | 0.02532  | -0.00110 |
| 109 | C7 | DXZ | -0.00480 | 0.00000  | 0.00000  | 0.00000  | 0.00000  |
| 110 | C7 | DYZ | 0.02932  | 0.00000  | 0.00000  | 0.00000  | 0.00000  |
| 111 | H3 | S   | 0.00000  | -0.01380 | -0.03819 | -0.04047 | -0.04644 |
| 112 | H3 | S   | 0.00000  | -0.92326 | -0.29414 | 0.40242  | -0.01999 |
| 113 | H3 | PX  | 0.00000  | 0.00913  | 0.00821  | 0.00007  | -0.00955 |
| 114 | H3 | PY  | 0.00000  | -0.00472 | -0.00476 | -0.00546 | -0.00057 |
| 115 | H3 | PZ  | 0.01209  | 0.00000  | 0.00000  | 0.00000  | 0.00000  |
| 116 | H4 | S   | 0.00000  | 0.01978  | 0.03208  | 0.02212  | -0.06799 |
| 117 | H4 | S   | 0.00000  | 0.50977  | 0.63525  | -0.34260 | -0.28106 |
| 118 | H4 | PX  | 0.00000  | 0.00766  | 0.00663  | -0.00248 | 0.00561  |
| 119 | H4 | PY  | 0.00000  | 0.00456  | 0.00587  | 0.00197  | -0.00149 |
| 120 | H4 | PZ  | -0.01205 | 0.00000  | 0.00000  | 0.00000  | 0.00000  |
| 121 | N1 | S   | 0.00000  | -0.01083 | -0.00927 | -0.08647 | -0.06256 |
| 122 | N1 | S   | 0.00000  | 0.05722  | -0.00298 | 0.08401  | 0.06655  |
| 123 | N1 | PX  | 0.00000  | 0.10929  | -0.05041 | 0.05750  | -0.00731 |
| 124 | N1 | PY  | 0.00000  | 0.00178  | 0.06922  | -0.07029 | 0.05344  |
| 125 | N1 | PZ  | 0.14631  | 0.00000  | 0.00000  | 0.00000  | 0.00000  |
| 126 | N1 | S   | 0.00000  | -0.18353 | 0.36997  | 1.96341  | 1.73138  |
| 127 | N1 | PX  | 0.00000  | 0.05469  | -0.07568 | 0.68926  | 0.76048  |
| 128 | N1 | PY  | 0.00000  | 0.11875  | 0.35593  | -0.36110 | 0.51483  |
| 129 | N1 | PZ  | 0.37853  | 0.00000  | 0.00000  | 0.00000  | 0.00000  |
| 130 | N1 | DXX | 0.00000  | 0.00634  | 0.00333  | -0.00525 | 0.00241  |
| 131 | N1 | DYY | 0.00000  | 0.01162  | -0.00926 | -0.01474 | 0.01063  |
| 132 | N1 | DZZ | 0.00000  | -0.00058 | -0.00355 | -0.02216 | -0.02015 |
| 133 | N1 | DXY | 0.00000  | -0.00044 | -0.00459 | 0.01317  | -0.00325 |
| 134 | N1 | DXZ | -0.00018 | 0.00000  | 0.00000  | 0.00000  | 0.00000  |
| 135 | N1 | DYZ | -0.02202 | 0.00000  | 0.00000  | 0.00000  | 0.00000  |
| 136 | H6 | S   | 0.00000  | 0.00345  | 0.05863  | 0.08373  | 0.01486  |
| 137 | H6 | S   | 0.00000  | 0.20774  | -0.71393 | -0.09938 | 0.23437  |

|     |     |     |          |          |          |          |          |
|-----|-----|-----|----------|----------|----------|----------|----------|
| 138 | H6  | PX  | 0.00000  | 0.00049  | -0.00741 | -0.00638 | -0.00276 |
| 139 | H6  | PY  | 0.00000  | -0.00774 | -0.00806 | 0.00503  | 0.01346  |
| 140 | H6  | PZ  | 0.01474  | 0.00000  | 0.00000  | 0.00000  | 0.00000  |
| 141 | C8  | S   | 0.00000  | 0.07175  | -0.08607 | 0.05805  | -0.02680 |
| 142 | C8  | S   | 0.00000  | -0.03215 | 0.08894  | -0.03719 | 0.10276  |
| 143 | C8  | PX  | 0.00000  | -0.11134 | 0.08893  | 0.21469  | -0.02264 |
| 144 | C8  | PY  | 0.00000  | -0.00053 | -0.01737 | -0.02860 | -0.12113 |
| 145 | C8  | PZ  | 0.00037  | 0.00000  | 0.00000  | 0.00000  | 0.00000  |
| 146 | C8  | S   | 0.00000  | -2.26608 | 2.66384  | -1.88145 | 0.95554  |
| 147 | C8  | PX  | 0.00000  | -0.95066 | 0.52156  | 1.40078  | -0.03361 |
| 148 | C8  | PY  | 0.00000  | 0.40665  | -1.23174 | 0.04214  | -2.18970 |
| 149 | C8  | PZ  | 0.00046  | 0.00000  | 0.00000  | 0.00000  | 0.00000  |
| 150 | C8  | DXX | 0.00000  | 0.00642  | -0.00860 | 0.01361  | -0.00508 |
| 151 | C8  | DYY | 0.00000  | -0.00882 | 0.01897  | -0.02485 | 0.01774  |
| 152 | C8  | DZZ | 0.00000  | 0.00274  | 0.00200  | -0.00566 | -0.00058 |
| 153 | C8  | DXY | 0.00000  | -0.01927 | 0.00050  | -0.00828 | 0.00060  |
| 154 | C8  | DXZ | -0.02167 | 0.00000  | 0.00000  | 0.00000  | 0.00000  |
| 155 | C8  | DYZ | 0.00101  | 0.00000  | 0.00000  | 0.00000  | 0.00000  |
| 156 | H8  | S   | 0.00000  | 0.02641  | 0.00819  | -0.12296 | 0.01984  |
| 157 | H8  | S   | 0.00000  | 0.13141  | 0.15173  | 0.32785  | 0.83967  |
| 158 | H8  | PX  | 0.00000  | -0.00180 | 0.00114  | -0.01034 | -0.00450 |
| 159 | H8  | PY  | 0.00000  | -0.00776 | 0.00571  | -0.00068 | -0.00177 |
| 160 | H8  | PZ  | -0.00753 | 0.00000  | 0.00000  | 0.00000  | 0.00000  |
| 161 | C10 | S   | 0.00000  | -0.03805 | 0.05039  | -0.03273 | 0.03781  |
| 162 | C10 | S   | 0.00000  | -0.00852 | 0.02820  | -0.01110 | 0.07093  |
| 163 | C10 | PX  | 0.00000  | -0.00349 | -0.03411 | -0.14969 | 0.00009  |
| 164 | C10 | PY  | 0.00000  | -0.02790 | 0.03254  | -0.04840 | 0.05233  |
| 165 | C10 | PZ  | 0.00891  | 0.00000  | 0.00000  | 0.00000  | 0.00000  |
| 166 | C10 | S   | 0.00000  | 1.26674  | -2.04767 | 0.98608  | -2.15973 |
| 167 | C10 | PX  | 0.00000  | 0.58155  | -0.51526 | -1.01902 | -0.06662 |
| 168 | C10 | PY  | 0.00000  | 0.72319  | -1.39967 | 0.71693  | -1.65225 |
| 169 | C10 | PZ  | 0.00407  | 0.00000  | 0.00000  | 0.00000  | 0.00000  |
| 170 | C10 | DXX | 0.00000  | 0.01068  | -0.01586 | 0.01456  | -0.00945 |
| 171 | C10 | DYY | 0.00000  | -0.00219 | 0.00148  | -0.00083 | 0.00795  |
| 172 | C10 | DZZ | 0.00000  | -0.00887 | 0.01357  | -0.01194 | 0.01007  |
| 173 | C10 | DXY | 0.00000  | 0.00272  | 0.00872  | 0.03546  | 0.01052  |
| 174 | C10 | DXZ | -0.00752 | 0.00000  | 0.00000  | 0.00000  | 0.00000  |
| 175 | C10 | DYZ | 0.00015  | 0.00000  | 0.00000  | 0.00000  | 0.00000  |
| 176 | H16 | S   | 0.00000  | -0.00506 | -0.04310 | -0.07049 | -0.06946 |
| 177 | H16 | S   | 0.00000  | -0.48389 | 0.37918  | 0.72256  | -0.17885 |
| 178 | H16 | PX  | 0.00000  | 0.00495  | -0.00517 | 0.00019  | -0.00105 |
| 179 | H16 | PY  | 0.00000  | 0.00311  | -0.00365 | 0.01382  | -0.00085 |
| 180 | H16 | PZ  | -0.00095 | 0.00000  | 0.00000  | 0.00000  | 0.00000  |
| 181 | H18 | S   | 0.00000  | 0.03554  | -0.02216 | 0.10737  | -0.01146 |
| 182 | H18 | S   | 0.00000  | 0.19138  | -0.28790 | -0.95919 | -0.07605 |
| 183 | H18 | PX  | 0.00000  | 0.00076  | 0.00086  | -0.00240 | 0.00198  |
| 184 | H18 | PY  | 0.00000  | 0.00329  | -0.00699 | -0.00747 | -0.00941 |
| 185 | H18 | PZ  | 0.00186  | 0.00000  | 0.00000  | 0.00000  | 0.00000  |

|              |          |          |          |          |          |
|--------------|----------|----------|----------|----------|----------|
| MO:          | 51       | 52       | 53       | 54       | 55       |
| Eigenvalues: | 0.49030  | 0.51970  | 0.54355  | 0.60485  | 0.67678  |
| (ev):        | 13.34168 | 14.14184 | 14.79076 | 16.45886 | 18.41607 |

A

A

A

A

A



|    |    |     |          |          |          |          |          |
|----|----|-----|----------|----------|----------|----------|----------|
| 1  | H1 | S   | -0.01427 | -0.03883 | 0.10299  | 0.07621  | 0.02263  |
| 2  | H1 | S   | 0.65913  | -0.05137 | -0.80123 | -0.26307 | -0.04286 |
| 3  | H1 | PX  | -0.00179 | -0.00407 | 0.01031  | 0.00894  | 0.00074  |
| 4  | H1 | PY  | -0.00558 | 0.00803  | 0.00619  | -0.00094 | -0.01485 |
| 5  | H1 | PZ  | 0.00000  | 0.00000  | 0.00000  | 0.00000  | 0.00000  |
| 6  | C1 | S   | -0.07350 | 0.00307  | 0.01004  | 0.01635  | 0.03748  |
| 7  | C1 | S   | 0.06177  | 0.00404  | -0.01098 | -0.04092 | -0.08733 |
| 8  | C1 | PX  | -0.16840 | -0.00023 | 0.08290  | 0.02372  | 0.09263  |
| 9  | C1 | PY  | 0.02254  | 0.13338  | -0.07018 | 0.23132  | 0.18922  |
| 10 | C1 | PZ  | 0.00000  | 0.00000  | 0.00000  | 0.00000  | 0.00000  |
| 11 | C1 | S   | 2.05776  | -0.24854 | -0.50426 | 0.66036  | -0.57445 |
| 12 | C1 | PX  | -1.32308 | -0.00977 | 1.07669  | 0.30135  | 0.25775  |
| 13 | C1 | PY  | -0.79341 | 1.64943  | -0.63109 | 1.01084  | -1.61620 |
| 14 | C1 | PZ  | 0.00000  | 0.00000  | 0.00000  | 0.00000  | 0.00000  |
| 15 | C1 | DXX | 0.00152  | -0.01221 | 0.04103  | 0.01635  | -0.00344 |
| 16 | C1 | DYY | 0.00678  | 0.00834  | -0.04132 | -0.00345 | 0.01212  |
| 17 | C1 | DZZ | -0.00122 | -0.00082 | -0.00103 | -0.00645 | -0.01430 |
| 18 | C1 | DXY | -0.01019 | 0.01337  | 0.02318  | -0.00557 | -0.01669 |
| 19 | C1 | DXZ | 0.00000  | 0.00000  | 0.00000  | 0.00000  | 0.00000  |
| 20 | C1 | DYZ | 0.00000  | 0.00000  | 0.00000  | 0.00000  | 0.00000  |
| 21 | C2 | S   | -0.08744 | 0.00462  | 0.01663  | -0.01740 | -0.01295 |
| 22 | C2 | S   | 0.06910  | -0.02408 | 0.04397  | -0.01017 | 0.08527  |
| 23 | C2 | PX  | 0.15913  | -0.04462 | -0.04015 | 0.02475  | 0.03178  |
| 24 | C2 | PY  | 0.02454  | 0.17089  | -0.14162 | 0.04600  | 0.13851  |
| 25 | C2 | PZ  | 0.00000  | 0.00000  | 0.00000  | 0.00000  | 0.00000  |
| 26 | C2 | S   | 2.64763  | 0.41942  | -1.44982 | 0.17842  | 0.70070  |
| 27 | C2 | PX  | 1.45754  | -0.12867 | -0.95832 | 0.77557  | -0.07870 |
| 28 | C2 | PY  | -0.33865 | 1.67089  | -0.64312 | -1.25593 | 0.52442  |
| 29 | C2 | PZ  | 0.00000  | 0.00000  | 0.00000  | 0.00000  | 0.00000  |
| 30 | C2 | DXX | 0.01871  | 0.00102  | 0.03321  | -0.03486 | 0.04801  |
| 31 | C2 | DYY | -0.00943 | -0.00977 | -0.02164 | 0.02839  | 0.01322  |
| 32 | C2 | DZZ | 0.00020  | 0.00190  | -0.00322 | -0.00354 | -0.01474 |
| 33 | C2 | DXY | 0.01303  | -0.01263 | -0.00428 | 0.00735  | 0.00139  |
| 34 | C2 | DXZ | 0.00000  | 0.00000  | 0.00000  | 0.00000  | 0.00000  |
| 35 | C2 | DYZ | 0.00000  | 0.00000  | 0.00000  | 0.00000  | 0.00000  |
| 36 | C3 | S   | 0.07192  | 0.00974  | 0.02860  | -0.07749 | -0.04116 |
| 37 | C3 | S   | -0.04278 | -0.07145 | 0.04352  | 0.04383  | 0.01215  |
| 38 | C3 | PX  | -0.08835 | 0.09417  | -0.17921 | -0.06520 | -0.10106 |
| 39 | C3 | PY  | -0.05524 | 0.19523  | 0.07037  | -0.02752 | -0.04573 |
| 40 | C3 | PZ  | 0.00000  | 0.00000  | 0.00000  | 0.00000  | 0.00000  |
| 41 | C3 | S   | -2.04248 | 0.52213  | -1.10102 | 2.83680  | 0.67669  |
| 42 | C3 | PX  | -0.73525 | 0.78577  | -1.26728 | -0.28726 | 0.12447  |
| 43 | C3 | PY  | -0.79744 | 1.39096  | 0.94945  | -0.39230 | -1.66383 |
| 44 | C3 | PZ  | 0.00000  | 0.00000  | 0.00000  | 0.00000  | 0.00000  |
| 45 | C3 | DXX | 0.00101  | -0.00962 | -0.00219 | 0.01796  | -0.00089 |
| 46 | C3 | DYY | 0.00540  | -0.00609 | 0.03732  | -0.01097 | -0.03627 |
| 47 | C3 | DZZ | -0.00852 | 0.00394  | -0.00900 | 0.00685  | 0.01582  |
| 48 | C3 | DXY | 0.00477  | -0.01692 | -0.01580 | -0.03217 | -0.03211 |
| 49 | C3 | DXZ | 0.00000  | 0.00000  | 0.00000  | 0.00000  | 0.00000  |
| 50 | C3 | DYZ | 0.00000  | 0.00000  | 0.00000  | 0.00000  | 0.00000  |
| 51 | C4 | S   | 0.03699  | 0.03841  | -0.00942 | -0.02968 | -0.02648 |
| 52 | C4 | S   | -0.03443 | -0.00534 | -0.10014 | 0.04084  | 0.04666  |
| 53 | C4 | PX  | 0.15936  | -0.02083 | -0.03148 | -0.08066 | 0.20663  |
| 54 | C4 | PY  | 0.03200  | 0.04984  | 0.10790  | -0.04604 | -0.13551 |

|     |    |     |          |          |          |          |          |
|-----|----|-----|----------|----------|----------|----------|----------|
| 55  | C4 | PZ  | 0.00000  | 0.00000  | 0.00000  | 0.00000  | 0.00000  |
| 56  | C4 | S   | -0.95524 | -1.76945 | 1.43224  | 0.64331  | 0.96979  |
| 57  | C4 | PX  | 0.10820  | -0.21702 | 0.21880  | -2.06549 | 0.60266  |
| 58  | C4 | PY  | 0.92814  | 0.53582  | -0.56872 | 0.29822  | -1.01452 |
| 59  | C4 | PZ  | 0.00000  | 0.00000  | 0.00000  | 0.00000  | 0.00000  |
| 60  | C4 | DXX | -0.02993 | 0.00792  | -0.00590 | -0.00754 | 0.00150  |
| 61  | C4 | DYY | 0.02134  | -0.01929 | 0.02224  | 0.00372  | 0.00417  |
| 62  | C4 | DZZ | -0.00134 | 0.00276  | -0.01317 | 0.00393  | -0.00059 |
| 63  | C4 | DXY | -0.01811 | -0.02396 | 0.02648  | -0.01712 | -0.01180 |
| 64  | C4 | DXZ | 0.00000  | 0.00000  | 0.00000  | 0.00000  | 0.00000  |
| 65  | C4 | DYZ | 0.00000  | 0.00000  | 0.00000  | 0.00000  | 0.00000  |
| 66  | C5 | S   | 0.02283  | 0.01208  | -0.00672 | 0.03083  | 0.02533  |
| 67  | C5 | S   | -0.02948 | -0.01600 | -0.05464 | 0.02177  | 0.03205  |
| 68  | C5 | PX  | -0.07994 | 0.08867  | -0.01180 | -0.19944 | -0.03773 |
| 69  | C5 | PY  | 0.04274  | 0.05465  | 0.06313  | -0.09646 | -0.00320 |
| 70  | C5 | PZ  | 0.00000  | 0.00000  | 0.00000  | 0.00000  | 0.00000  |
| 71  | C5 | S   | -0.69363 | -1.07104 | 1.14021  | -1.10059 | -0.51836 |
| 72  | C5 | PX  | 0.64673  | 1.09997  | -0.68945 | -1.71537 | 0.65675  |
| 73  | C5 | PY  | 1.22667  | 0.44228  | -0.65265 | -0.13441 | 1.10596  |
| 74  | C5 | PZ  | 0.00000  | 0.00000  | 0.00000  | 0.00000  | 0.00000  |
| 75  | C5 | DXX | -0.03924 | 0.00157  | -0.00335 | 0.00191  | -0.01926 |
| 76  | C5 | DYY | 0.03056  | -0.01353 | 0.01800  | -0.00871 | 0.03146  |
| 77  | C5 | DZZ | -0.00051 | 0.00003  | -0.00741 | 0.00073  | -0.00420 |
| 78  | C5 | DXY | 0.00947  | 0.02829  | -0.03124 | 0.01952  | -0.01177 |
| 79  | C5 | DXZ | 0.00000  | 0.00000  | 0.00000  | 0.00000  | 0.00000  |
| 80  | C5 | DYZ | 0.00000  | 0.00000  | 0.00000  | 0.00000  | 0.00000  |
| 81  | C6 | S   | 0.05328  | -0.03661 | 0.08129  | 0.05694  | 0.03769  |
| 82  | C6 | S   | -0.01967 | -0.04885 | 0.05381  | -0.07916 | 0.09048  |
| 83  | C6 | PX  | 0.18764  | -0.04425 | -0.03057 | 0.05270  | -0.03807 |
| 84  | C6 | PY  | -0.11615 | 0.07881  | 0.07772  | 0.07334  | 0.09536  |
| 85  | C6 | PZ  | 0.00000  | 0.00000  | 0.00000  | 0.00000  | 0.00000  |
| 86  | C6 | S   | -1.58038 | 2.35462  | -2.60046 | -1.96479 | -1.81687 |
| 87  | C6 | PX  | 0.63566  | -0.61256 | 0.06268  | -0.35854 | 0.62264  |
| 88  | C6 | PY  | -1.04955 | -0.16344 | 2.01068  | -0.72264 | 1.98262  |
| 89  | C6 | PZ  | 0.00000  | 0.00000  | 0.00000  | 0.00000  | 0.00000  |
| 90  | C6 | DXX | -0.01463 | -0.01739 | 0.02101  | 0.01006  | 0.03554  |
| 91  | C6 | DYY | 0.02560  | 0.01688  | 0.02265  | -0.03002 | -0.01824 |
| 92  | C6 | DZZ | -0.00669 | 0.00692  | -0.01887 | -0.00525 | -0.01479 |
| 93  | C6 | DXY | -0.00171 | 0.02894  | 0.00864  | 0.00756  | 0.03761  |
| 94  | C6 | DXZ | 0.00000  | 0.00000  | 0.00000  | 0.00000  | 0.00000  |
| 95  | C6 | DYZ | 0.00000  | 0.00000  | 0.00000  | 0.00000  | 0.00000  |
| 96  | C7 | S   | -0.01824 | 0.00890  | -0.04585 | 0.08715  | 0.00232  |
| 97  | C7 | S   | 0.07761  | -0.04465 | 0.09997  | -0.13183 | -0.23520 |
| 98  | C7 | PX  | -0.01396 | 0.05493  | -0.02860 | 0.23037  | -0.03001 |
| 99  | C7 | PY  | 0.03250  | 0.09474  | 0.15516  | 0.15263  | -0.08748 |
| 100 | C7 | PZ  | 0.00000  | 0.00000  | 0.00000  | 0.00000  | 0.00000  |
| 101 | C7 | S   | -0.07545 | -0.08110 | 1.19192  | -2.39016 | -0.06388 |
| 102 | C7 | PX  | 0.76496  | 0.41173  | 0.00752  | 1.76302  | 0.04354  |
| 103 | C7 | PY  | 0.61259  | 0.44255  | 1.29911  | -0.43818 | -1.63376 |
| 104 | C7 | PZ  | 0.00000  | 0.00000  | 0.00000  | 0.00000  | 0.00000  |
| 105 | C7 | DXX | 0.02123  | 0.00157  | 0.03569  | -0.01865 | -0.04456 |
| 106 | C7 | DYY | -0.01126 | -0.02055 | -0.00698 | -0.00053 | -0.01454 |
| 107 | C7 | DZZ | 0.00088  | 0.00455  | -0.00472 | -0.01230 | -0.00298 |
| 108 | C7 | DXY | -0.01101 | 0.02891  | 0.00265  | 0.01457  | 0.00110  |

|     |     |     |          |          |          |          |          |
|-----|-----|-----|----------|----------|----------|----------|----------|
| 109 | C7  | DXZ | 0.00000  | 0.00000  | 0.00000  | 0.00000  | 0.00000  |
| 110 | C7  | DYZ | 0.00000  | 0.00000  | 0.00000  | 0.00000  | 0.00000  |
| 111 | H3  | S   | 0.00711  | -0.10122 | 0.11400  | -0.03964 | -0.00977 |
| 112 | H3  | S   | -0.50993 | -0.03714 | -0.06424 | 0.34488  | 0.32379  |
| 113 | H3  | PX  | -0.01818 | -0.00403 | 0.00786  | -0.01217 | -0.00901 |
| 114 | H3  | PY  | 0.01037  | -0.00687 | 0.00387  | 0.00195  | 0.00038  |
| 115 | H3  | PZ  | 0.00000  | 0.00000  | 0.00000  | 0.00000  | 0.00000  |
| 116 | H4  | S   | 0.02602  | -0.09449 | 0.10061  | -0.04628 | 0.06360  |
| 117 | H4  | S   | -0.44439 | 0.24494  | -0.15707 | -0.20638 | -0.34633 |
| 118 | H4  | PX  | 0.01891  | 0.00824  | -0.01045 | 0.00430  | 0.00587  |
| 119 | H4  | PY  | 0.01362  | -0.00674 | 0.00305  | 0.00022  | 0.01481  |
| 120 | H4  | PZ  | 0.00000  | 0.00000  | 0.00000  | 0.00000  | 0.00000  |
| 121 | N1  | S   | -0.02228 | 0.06133  | -0.08276 | -0.01170 | 0.00584  |
| 122 | N1  | S   | 0.04651  | -0.02315 | 0.04549  | 0.00476  | -0.01860 |
| 123 | N1  | PX  | -0.00062 | -0.07276 | 0.01197  | 0.07515  | -0.14493 |
| 124 | N1  | PY  | 0.04381  | 0.12835  | 0.14395  | -0.06739 | 0.28232  |
| 125 | N1  | PZ  | 0.00000  | 0.00000  | 0.00000  | 0.00000  | 0.00000  |
| 126 | N1  | S   | 0.14259  | -2.01169 | 2.67197  | 0.13945  | 0.58854  |
| 127 | N1  | PX  | -0.18583 | -0.73939 | 0.66788  | -0.05580 | -0.29675 |
| 128 | N1  | PY  | -0.01099 | -0.38253 | 0.78200  | -0.00207 | 1.81568  |
| 129 | N1  | PZ  | 0.00000  | 0.00000  | 0.00000  | 0.00000  | 0.00000  |
| 130 | N1  | DXX | 0.00476  | -0.00067 | 0.00653  | 0.01356  | -0.00056 |
| 131 | N1  | DYY | -0.01821 | -0.01137 | 0.00387  | -0.02093 | 0.04100  |
| 132 | N1  | DZZ | -0.00238 | 0.03768  | -0.04988 | -0.00321 | -0.01273 |
| 133 | N1  | DXY | 0.01781  | -0.00948 | -0.00661 | -0.02618 | -0.01922 |
| 134 | N1  | DXZ | 0.00000  | 0.00000  | 0.00000  | 0.00000  | 0.00000  |
| 135 | N1  | DYZ | 0.00000  | 0.00000  | 0.00000  | 0.00000  | 0.00000  |
| 136 | H6  | S   | 0.04367  | 0.00382  | 0.07110  | -0.12393 | 0.11181  |
| 137 | H6  | S   | 0.59411  | -0.17236 | -0.52972 | 0.39123  | -0.17694 |
| 138 | H6  | PX  | -0.00128 | -0.00041 | -0.00757 | 0.01284  | -0.01239 |
| 139 | H6  | PY  | -0.00813 | 0.00467  | 0.00335  | -0.00799 | 0.00495  |
| 140 | H6  | PZ  | 0.00000  | 0.00000  | 0.00000  | 0.00000  | 0.00000  |
| 141 | C8  | S   | 0.02609  | -0.02933 | 0.02608  | -0.04696 | -0.04975 |
| 142 | C8  | S   | -0.04201 | -0.02565 | 0.12892  | 0.05560  | -0.06999 |
| 143 | C8  | PX  | 0.08527  | 0.06016  | 0.02942  | 0.09293  | -0.35871 |
| 144 | C8  | PY  | -0.01766 | 0.23805  | 0.13554  | 0.15765  | 0.16002  |
| 145 | C8  | PZ  | 0.00000  | 0.00000  | 0.00000  | 0.00000  | 0.00000  |
| 146 | C8  | S   | 0.20217  | -0.87336 | -1.81052 | 0.64377  | 0.68897  |
| 147 | C8  | PX  | 0.55610  | -0.13349 | 0.76425  | 1.41909  | -2.01277 |
| 148 | C8  | PY  | 0.13151  | 2.87915  | 0.98822  | 1.28746  | 0.28063  |
| 149 | C8  | PZ  | 0.00000  | 0.00000  | 0.00000  | 0.00000  | 0.00000  |
| 150 | C8  | DXX | -0.00495 | -0.02009 | -0.00486 | -0.00558 | -0.02052 |
| 151 | C8  | DYY | 0.03447  | -0.03555 | 0.02023  | -0.01773 | -0.05226 |
| 152 | C8  | DZZ | -0.00802 | 0.01797  | 0.00051  | 0.01688  | 0.02682  |
| 153 | C8  | DXY | 0.00745  | 0.00436  | 0.01138  | -0.04858 | 0.01696  |
| 154 | C8  | DXZ | 0.00000  | 0.00000  | 0.00000  | 0.00000  | 0.00000  |
| 155 | C8  | DYZ | 0.00000  | 0.00000  | 0.00000  | 0.00000  | 0.00000  |
| 156 | H8  | S   | 0.02982  | 0.00081  | 0.02173  | -0.01617 | -0.10895 |
| 157 | H8  | S   | -0.43863 | -0.08131 | 0.02113  | -0.76945 | -0.34375 |
| 158 | H8  | PX  | 0.00627  | 0.00537  | 0.00725  | 0.00138  | -0.00821 |
| 159 | H8  | PY  | 0.00107  | 0.01832  | 0.00665  | 0.00194  | -0.01240 |
| 160 | H8  | PZ  | 0.00000  | 0.00000  | 0.00000  | 0.00000  | 0.00000  |
| 161 | C10 | S   | -0.00872 | -0.03329 | -0.03234 | -0.00186 | 0.00353  |
| 162 | C10 | S   | 0.06738  | -0.10696 | 0.05772  | -0.09036 | -0.18689 |

|     |     |     |          |          |          |          |          |
|-----|-----|-----|----------|----------|----------|----------|----------|
| 163 | C10 | PX  | 0.01291  | 0.02814  | 0.02298  | -0.13784 | -0.08461 |
| 164 | C10 | PY  | 0.10221  | -0.07966 | 0.09318  | -0.09325 | -0.16797 |
| 165 | C10 | PZ  | 0.00000  | 0.00000  | 0.00000  | 0.00000  | 0.00000  |
| 166 | C10 | S   | -0.09196 | 2.55093  | 1.12400  | 0.93862  | 0.18108  |
| 167 | C10 | PX  | -0.34665 | 0.23721  | -0.21923 | -0.54354 | 1.13862  |
| 168 | C10 | PY  | 0.22986  | 2.06353  | 1.52188  | 0.74524  | 0.07089  |
| 169 | C10 | PZ  | 0.00000  | 0.00000  | 0.00000  | 0.00000  | 0.00000  |
| 170 | C10 | DXX | 0.00556  | 0.00709  | 0.02336  | 0.00673  | -0.03029 |
| 171 | C10 | DYY | -0.00882 | -0.00140 | -0.00240 | -0.00973 | -0.01333 |
| 172 | C10 | DZZ | 0.00532  | -0.00772 | -0.00388 | -0.00467 | 0.00089  |
| 173 | C10 | DXY | 0.00052  | -0.01686 | 0.00238  | 0.06286  | -0.03737 |
| 174 | C10 | DXZ | 0.00000  | 0.00000  | 0.00000  | 0.00000  | 0.00000  |
| 175 | C10 | DYZ | 0.00000  | 0.00000  | 0.00000  | 0.00000  | 0.00000  |
| 176 | H16 | S   | 0.01826  | 0.11310  | 0.06227  | -0.14365 | 0.02553  |
| 177 | H16 | S   | 0.40690  | 0.18864  | 0.56184  | 0.59776  | -0.71765 |
| 178 | H16 | PX  | -0.00078 | 0.00080  | 0.00418  | 0.00315  | 0.00502  |
| 179 | H16 | PY  | 0.00265  | -0.00269 | 0.00703  | 0.01687  | -0.00467 |
| 180 | H16 | PZ  | 0.00000  | 0.00000  | 0.00000  | 0.00000  | 0.00000  |
| 181 | H18 | S   | -0.00361 | 0.01194  | 0.07839  | 0.19555  | -0.04932 |
| 182 | H18 | S   | -0.05706 | 0.32387  | 0.25862  | -0.44740 | 0.65254  |
| 183 | H18 | PX  | -0.00321 | -0.00304 | -0.00510 | 0.00127  | 0.01650  |
| 184 | H18 | PY  | 0.00184  | 0.01122  | -0.00218 | -0.01648 | 0.00925  |
| 185 | H18 | PZ  | 0.00000  | 0.00000  | 0.00000  | 0.00000  | 0.00000  |

|              |          |          |          |          |          |
|--------------|----------|----------|----------|----------|----------|
| M0:          | 56       | 57       | 58       | 59       | 60       |
| Eigenvalues: | 0.69523  | 0.71512  | 0.73307  | 0.74791  | 0.76776  |
| (ev):        | 18.91831 | 19.45933 | 19.94784 | 20.35166 | 20.89194 |

|    |    |     |          |          |          |          |          |
|----|----|-----|----------|----------|----------|----------|----------|
|    |    |     | A        | A        | A        | A        | A        |
| 1  | H1 | S   | 0.06892  | 0.05056  | 0.00000  | 0.14966  | 0.00000  |
| 2  | H1 | S   | 0.29864  | -0.17617 | 0.00000  | 0.08336  | 0.00000  |
| 3  | H1 | PX  | -0.00441 | -0.00809 | 0.00000  | 0.01080  | 0.00000  |
| 4  | H1 | PY  | -0.00333 | -0.00225 | 0.00000  | -0.00042 | 0.00000  |
| 5  | H1 | PZ  | 0.00000  | 0.00000  | -0.00573 | 0.00000  | 0.00050  |
| 6  | C1 | S   | -0.01403 | -0.02018 | 0.00000  | 0.00099  | 0.00000  |
| 7  | C1 | S   | -0.04470 | -0.37082 | 0.00000  | 0.32524  | 0.00000  |
| 8  | C1 | PX  | 0.07418  | 0.14509  | 0.00000  | -0.04744 | 0.00000  |
| 9  | C1 | PY  | -0.28108 | 0.25823  | 0.00000  | 0.01106  | 0.00000  |
| 10 | C1 | PZ  | 0.00000  | 0.00000  | -0.44924 | 0.00000  | -0.14109 |
| 11 | C1 | S   | 0.02882  | 1.04424  | 0.00000  | -0.29038 | 0.00000  |
| 12 | C1 | PX  | -0.66667 | -0.29101 | 0.00000  | -0.21613 | 0.00000  |
| 13 | C1 | PY  | 1.41642  | -0.24273 | 0.00000  | 1.16566  | 0.00000  |
| 14 | C1 | PZ  | 0.00000  | 0.00000  | 0.35965  | 0.00000  | 0.11240  |
| 15 | C1 | DXX | 0.01206  | -0.01105 | 0.00000  | 0.06760  | 0.00000  |
| 16 | C1 | DYY | -0.03354 | -0.06484 | 0.00000  | 0.03000  | 0.00000  |
| 17 | C1 | DZZ | 0.00899  | -0.00591 | 0.00000  | -0.00817 | 0.00000  |
| 18 | C1 | DXY | -0.01461 | 0.00522  | 0.00000  | -0.00759 | 0.00000  |
| 19 | C1 | DXZ | 0.00000  | 0.00000  | 0.02022  | 0.00000  | 0.01220  |
| 20 | C1 | DYZ | 0.00000  | 0.00000  | -0.01264 | 0.00000  | -0.01092 |
| 21 | C2 | S   | -0.03210 | 0.02347  | 0.00000  | 0.07388  | 0.00000  |
| 22 | C2 | S   | -0.15177 | -0.36041 | 0.00000  | 0.15407  | 0.00000  |
| 23 | C2 | PX  | -0.05113 | -0.22547 | 0.00000  | -0.12185 | 0.00000  |
| 24 | C2 | PY  | -0.09471 | 0.12163  | 0.00000  | 0.32697  | 0.00000  |
| 25 | C2 | PZ  | 0.00000  | 0.00000  | -0.32660 | 0.00000  | -0.30425 |

|    |    |     |          |          |          |          |          |
|----|----|-----|----------|----------|----------|----------|----------|
| 26 | C2 | S   | 0.65352  | -0.07583 | 0.00000  | -1.41985 | 0.00000  |
| 27 | C2 | PX  | 0.07358  | 0.02490  | 0.00000  | -1.00155 | 0.00000  |
| 28 | C2 | PY  | -1.03628 | -0.14639 | 0.00000  | -2.08684 | 0.00000  |
| 29 | C2 | PZ  | 0.00000  | 0.00000  | 0.23266  | 0.00000  | 0.26924  |
| 30 | C2 | DXX | 0.01293  | -0.02333 | 0.00000  | 0.07699  | 0.00000  |
| 31 | C2 | DYY | -0.07004 | -0.03746 | 0.00000  | 0.05271  | 0.00000  |
| 32 | C2 | DZZ | 0.00862  | -0.00710 | 0.00000  | -0.04883 | 0.00000  |
| 33 | C2 | DXY | -0.02542 | 0.02100  | 0.00000  | -0.00095 | 0.00000  |
| 34 | C2 | DXZ | 0.00000  | 0.00000  | -0.01851 | 0.00000  | -0.01468 |
| 35 | C2 | DYZ | 0.00000  | 0.00000  | -0.00779 | 0.00000  | -0.02025 |
| 36 | C3 | S   | 0.05490  | -0.00482 | 0.00000  | 0.06761  | 0.00000  |
| 37 | C3 | S   | -0.14849 | -0.45192 | 0.00000  | 0.21847  | 0.00000  |
| 38 | C3 | PX  | 0.32751  | -0.04370 | 0.00000  | 0.17688  | 0.00000  |
| 39 | C3 | PY  | -0.17304 | -0.03228 | 0.00000  | 0.02240  | 0.00000  |
| 40 | C3 | PZ  | 0.00000  | 0.00000  | -0.34603 | 0.00000  | -0.04261 |
| 41 | C3 | S   | -0.07984 | -0.65097 | 0.00000  | -2.41115 | 0.00000  |
| 42 | C3 | PX  | 1.95298  | -0.47332 | 0.00000  | 1.43583  | 0.00000  |
| 43 | C3 | PY  | 0.08630  | 0.68031  | 0.00000  | 1.69180  | 0.00000  |
| 44 | C3 | PZ  | 0.00000  | 0.00000  | 0.15968  | 0.00000  | 0.05153  |
| 45 | C3 | DXX | -0.00797 | -0.09252 | 0.00000  | 0.06114  | 0.00000  |
| 46 | C3 | DYY | 0.04051  | -0.07811 | 0.00000  | 0.03308  | 0.00000  |
| 47 | C3 | DZZ | -0.02855 | 0.01924  | 0.00000  | -0.03093 | 0.00000  |
| 48 | C3 | DXY | -0.01516 | -0.06829 | 0.00000  | -0.03322 | 0.00000  |
| 49 | C3 | DXZ | 0.00000  | 0.00000  | -0.00453 | 0.00000  | 0.01001  |
| 50 | C3 | DYZ | 0.00000  | 0.00000  | 0.01808  | 0.00000  | -0.02396 |
| 51 | C4 | S   | -0.01808 | 0.02570  | 0.00000  | 0.01678  | 0.00000  |
| 52 | C4 | S   | -0.13015 | -0.30800 | 0.00000  | 0.23331  | 0.00000  |
| 53 | C4 | PX  | -0.10496 | 0.17869  | 0.00000  | 0.00895  | 0.00000  |
| 54 | C4 | PY  | 0.13259  | 0.09501  | 0.00000  | -0.02082 | 0.00000  |
| 55 | C4 | PZ  | 0.00000  | 0.00000  | -0.36051 | 0.00000  | -0.32562 |
| 56 | C4 | S   | -0.24751 | -0.26206 | 0.00000  | -0.97401 | 0.00000  |
| 57 | C4 | PX  | -0.73060 | -0.05359 | 0.00000  | -0.74892 | 0.00000  |
| 58 | C4 | PY  | 0.29531  | 0.54445  | 0.00000  | 0.88838  | 0.00000  |
| 59 | C4 | PZ  | 0.00000  | 0.00000  | 0.24528  | 0.00000  | 0.24418  |
| 60 | C4 | DXX | -0.04454 | -0.05579 | 0.00000  | -0.00217 | 0.00000  |
| 61 | C4 | DYY | -0.01114 | 0.00241  | 0.00000  | 0.05601  | 0.00000  |
| 62 | C4 | DZZ | 0.00818  | -0.00683 | 0.00000  | -0.00964 | 0.00000  |
| 63 | C4 | DXY | 0.03905  | 0.01344  | 0.00000  | 0.02137  | 0.00000  |
| 64 | C4 | DXZ | 0.00000  | 0.00000  | -0.00517 | 0.00000  | 0.00839  |
| 65 | C4 | DYZ | 0.00000  | 0.00000  | 0.02606  | 0.00000  | 0.01110  |
| 66 | C5 | S   | 0.02214  | -0.02895 | 0.00000  | -0.01305 | 0.00000  |
| 67 | C5 | S   | -0.27542 | -0.24873 | 0.00000  | 0.34811  | 0.00000  |
| 68 | C5 | PX  | -0.04278 | -0.15727 | 0.00000  | -0.22806 | 0.00000  |
| 69 | C5 | PY  | 0.21112  | 0.00165  | 0.00000  | -0.22001 | 0.00000  |
| 70 | C5 | PZ  | 0.00000  | 0.00000  | -0.36154 | 0.00000  | -0.34296 |
| 71 | C5 | S   | 0.35755  | 0.68699  | 0.00000  | 1.22494  | 0.00000  |
| 72 | C5 | PX  | -0.87559 | 0.33335  | 0.00000  | -0.49337 | 0.00000  |
| 73 | C5 | PY  | -0.50887 | -0.37321 | 0.00000  | -1.24425 | 0.00000  |
| 74 | C5 | PZ  | 0.00000  | 0.00000  | 0.24772  | 0.00000  | 0.26389  |
| 75 | C5 | DXX | -0.01464 | -0.06171 | 0.00000  | 0.05145  | 0.00000  |
| 76 | C5 | DYY | 0.00199  | -0.02451 | 0.00000  | 0.06159  | 0.00000  |
| 77 | C5 | DZZ | -0.01909 | 0.00915  | 0.00000  | -0.01277 | 0.00000  |
| 78 | C5 | DXY | -0.02784 | -0.01906 | 0.00000  | -0.00284 | 0.00000  |
| 79 | C5 | DXZ | 0.00000  | 0.00000  | 0.00112  | 0.00000  | -0.00556 |

|     |    |     |          |          |          |          |          |
|-----|----|-----|----------|----------|----------|----------|----------|
| 80  | C5 | DYZ | 0.00000  | 0.00000  | 0.01626  | 0.00000  | 0.02354  |
| 81  | C6 | S   | -0.00545 | -0.02806 | 0.00000  | -0.07742 | 0.00000  |
| 82  | C6 | S   | -0.25122 | -0.37212 | 0.00000  | 0.41437  | 0.00000  |
| 83  | C6 | PX  | 0.23921  | -0.19009 | 0.00000  | 0.13340  | 0.00000  |
| 84  | C6 | PY  | -0.00234 | -0.16428 | 0.00000  | 0.09667  | 0.00000  |
| 85  | C6 | PZ  | 0.00000  | 0.00000  | -0.37678 | 0.00000  | -0.02906 |
| 86  | C6 | S   | 0.64720  | 1.16243  | 0.00000  | 0.38987  | 0.00000  |
| 87  | C6 | PX  | 2.14425  | -0.47071 | 0.00000  | 1.84528  | 0.00000  |
| 88  | C6 | PY  | -0.40261 | -0.56908 | 0.00000  | 0.08168  | 0.00000  |
| 89  | C6 | PZ  | 0.00000  | 0.00000  | 0.26801  | 0.00000  | -0.03171 |
| 90  | C6 | DXX | -0.08061 | -0.06455 | 0.00000  | 0.01949  | 0.00000  |
| 91  | C6 | DYY | 0.02771  | -0.05692 | 0.00000  | -0.01811 | 0.00000  |
| 92  | C6 | DZZ | -0.00226 | 0.01152  | 0.00000  | 0.03604  | 0.00000  |
| 93  | C6 | DXY | 0.00708  | 0.05822  | 0.00000  | 0.03933  | 0.00000  |
| 94  | C6 | DXZ | 0.00000  | 0.00000  | 0.00362  | 0.00000  | -0.00944 |
| 95  | C6 | DYZ | 0.00000  | 0.00000  | 0.00235  | 0.00000  | -0.00790 |
| 96  | C7 | S   | 0.02385  | -0.04428 | 0.00000  | -0.03626 | 0.00000  |
| 97  | C7 | S   | -0.02775 | -0.19028 | 0.00000  | 0.13394  | 0.00000  |
| 98  | C7 | PX  | 0.19257  | -0.11429 | 0.00000  | 0.01039  | 0.00000  |
| 99  | C7 | PY  | 0.35878  | -0.01965 | 0.00000  | 0.22222  | 0.00000  |
| 100 | C7 | PZ  | 0.00000  | 0.00000  | -0.38102 | 0.00000  | 0.44797  |
| 101 | C7 | S   | -0.25804 | 1.31888  | 0.00000  | 1.96468  | 0.00000  |
| 102 | C7 | PX  | -0.42660 | -0.47791 | 0.00000  | -1.66957 | 0.00000  |
| 103 | C7 | PY  | -1.53831 | 0.83158  | 0.00000  | 0.46757  | 0.00000  |
| 104 | C7 | PZ  | 0.00000  | 0.00000  | 0.32958  | 0.00000  | -0.36572 |
| 105 | C7 | DXX | -0.00045 | -0.09515 | 0.00000  | -0.00560 | 0.00000  |
| 106 | C7 | DYY | -0.00598 | -0.00290 | 0.00000  | 0.03864  | 0.00000  |
| 107 | C7 | DZZ | -0.00078 | 0.02886  | 0.00000  | 0.00185  | 0.00000  |
| 108 | C7 | DXY | 0.00448  | 0.02512  | 0.00000  | 0.04831  | 0.00000  |
| 109 | C7 | DXZ | 0.00000  | 0.00000  | 0.02057  | 0.00000  | -0.00896 |
| 110 | C7 | DYZ | 0.00000  | 0.00000  | -0.02121 | 0.00000  | 0.00369  |
| 111 | H3 | S   | 0.06727  | 0.08680  | 0.00000  | 0.12979  | 0.00000  |
| 112 | H3 | S   | -0.09535 | -0.37471 | 0.00000  | -0.23099 | 0.00000  |
| 113 | H3 | PX  | 0.00731  | -0.00969 | 0.00000  | -0.00126 | 0.00000  |
| 114 | H3 | PY  | -0.00761 | 0.00602  | 0.00000  | 0.01429  | 0.00000  |
| 115 | H3 | PZ  | 0.00000  | 0.00000  | -0.00284 | 0.00000  | -0.00423 |
| 116 | H4 | S   | 0.13939  | 0.00026  | 0.00000  | 0.13184  | 0.00000  |
| 117 | H4 | S   | -0.23477 | 0.09087  | 0.00000  | 0.38212  | 0.00000  |
| 118 | H4 | PX  | -0.00457 | 0.01121  | 0.00000  | 0.00336  | 0.00000  |
| 119 | H4 | PY  | -0.00095 | -0.00452 | 0.00000  | 0.01497  | 0.00000  |
| 120 | H4 | PZ  | 0.00000  | 0.00000  | -0.00549 | 0.00000  | -0.00087 |
| 121 | N1 | S   | 0.02136  | 0.00883  | 0.00000  | 0.00057  | 0.00000  |
| 122 | N1 | S   | -0.01846 | 0.02293  | 0.00000  | -0.09993 | 0.00000  |
| 123 | N1 | PX  | -0.04600 | 0.14551  | 0.00000  | 0.03780  | 0.00000  |
| 124 | N1 | PY  | 0.15291  | -0.08275 | 0.00000  | -0.05563 | 0.00000  |
| 125 | N1 | PZ  | 0.00000  | 0.00000  | -0.07137 | 0.00000  | 0.09813  |
| 126 | N1 | S   | -1.13260 | -0.24592 | 0.00000  | 0.78941  | 0.00000  |
| 127 | N1 | PX  | -0.99834 | 0.28230  | 0.00000  | 0.07155  | 0.00000  |
| 128 | N1 | PY  | 0.91179  | -0.83174 | 0.00000  | 0.35523  | 0.00000  |
| 129 | N1 | PZ  | 0.00000  | 0.00000  | -0.00110 | 0.00000  | 0.01559  |
| 130 | N1 | DXX | -0.00846 | -0.01597 | 0.00000  | -0.03430 | 0.00000  |
| 131 | N1 | DYY | -0.05156 | 0.02652  | 0.00000  | 0.01989  | 0.00000  |
| 132 | N1 | DZZ | 0.03709  | 0.02474  | 0.00000  | -0.03030 | 0.00000  |
| 133 | N1 | DXY | 0.02937  | -0.01309 | 0.00000  | -0.00167 | 0.00000  |

|     |     |     |          |          |          |          |          |
|-----|-----|-----|----------|----------|----------|----------|----------|
| 134 | N1  | DXZ | 0.00000  | 0.00000  | -0.01499 | 0.00000  | 0.00211  |
| 135 | N1  | DYZ | 0.00000  | 0.00000  | -0.02203 | 0.00000  | 0.00198  |
| 136 | H6  | S   | 0.05115  | 0.05757  | 0.00000  | 0.25880  | 0.00000  |
| 137 | H6  | S   | -0.23537 | -0.09977 | 0.00000  | -0.51264 | 0.00000  |
| 138 | H6  | PX  | 0.00344  | 0.00853  | 0.00000  | -0.02297 | 0.00000  |
| 139 | H6  | PY  | 0.00654  | -0.00862 | 0.00000  | -0.00749 | 0.00000  |
| 140 | H6  | PZ  | 0.00000  | 0.00000  | -0.00306 | 0.00000  | -0.00292 |
| 141 | C8  | S   | -0.04494 | 0.02663  | 0.00000  | -0.00946 | 0.00000  |
| 142 | C8  | S   | -0.23694 | -0.16566 | 0.00000  | 0.01794  | 0.00000  |
| 143 | C8  | PX  | 0.02283  | -0.03799 | 0.00000  | 0.05385  | 0.00000  |
| 144 | C8  | PY  | -0.00383 | -0.07629 | 0.00000  | 0.06709  | 0.00000  |
| 145 | C8  | PZ  | 0.00000  | 0.00000  | -0.20391 | 0.00000  | 0.34340  |
| 146 | C8  | S   | 1.28181  | -0.27566 | 0.00000  | -0.64381 | 0.00000  |
| 147 | C8  | PX  | -1.73367 | 0.53535  | 0.00000  | -0.62412 | 0.00000  |
| 148 | C8  | PY  | 0.47013  | -1.16125 | 0.00000  | -1.29958 | 0.00000  |
| 149 | C8  | PZ  | 0.00000  | 0.00000  | 0.07960  | 0.00000  | -0.24746 |
| 150 | C8  | DXX | -0.07507 | 0.01844  | 0.00000  | 0.01227  | 0.00000  |
| 151 | C8  | DYY | -0.01102 | -0.05602 | 0.00000  | -0.05302 | 0.00000  |
| 152 | C8  | DZZ | 0.02481  | -0.00964 | 0.00000  | 0.01249  | 0.00000  |
| 153 | C8  | DXY | -0.04193 | -0.00375 | 0.00000  | -0.00765 | 0.00000  |
| 154 | C8  | DXZ | 0.00000  | 0.00000  | -0.00908 | 0.00000  | 0.00687  |
| 155 | C8  | DYZ | 0.00000  | 0.00000  | 0.01088  | 0.00000  | -0.03428 |
| 156 | H8  | S   | 0.05962  | -0.27197 | 0.00000  | -0.12523 | 0.00000  |
| 157 | H8  | S   | -0.05290 | 0.46387  | 0.00000  | 0.88067  | 0.00000  |
| 158 | H8  | PX  | 0.00253  | -0.01863 | 0.00000  | -0.00710 | 0.00000  |
| 159 | H8  | PY  | 0.00156  | 0.00543  | 0.00000  | 0.01025  | 0.00000  |
| 160 | H8  | PZ  | 0.00000  | 0.00000  | -0.00396 | 0.00000  | 0.00900  |
| 161 | C10 | S   | 0.00420  | 0.00110  | 0.00000  | 0.00193  | 0.00000  |
| 162 | C10 | S   | -0.18237 | -0.05450 | 0.00000  | -0.12835 | 0.00000  |
| 163 | C10 | PX  | -0.12790 | -0.00977 | 0.00000  | -0.00636 | 0.00000  |
| 164 | C10 | PY  | -0.03164 | -0.10597 | 0.00000  | -0.19341 | 0.00000  |
| 165 | C10 | PZ  | 0.00000  | 0.00000  | -0.27598 | 0.00000  | 0.68377  |
| 166 | C10 | S   | 0.23300  | -0.59333 | 0.00000  | -0.57581 | 0.00000  |
| 167 | C10 | PX  | 0.75928  | -0.16293 | 0.00000  | 0.15531  | 0.00000  |
| 168 | C10 | PY  | -0.46811 | -0.28653 | 0.00000  | -0.15194 | 0.00000  |
| 169 | C10 | PZ  | 0.00000  | 0.00000  | 0.25610  | 0.00000  | -0.61444 |
| 170 | C10 | DXX | -0.04765 | -0.00388 | 0.00000  | -0.01726 | 0.00000  |
| 171 | C10 | DYY | -0.01909 | -0.00160 | 0.00000  | -0.00979 | 0.00000  |
| 172 | C10 | DZZ | 0.01287  | -0.00524 | 0.00000  | -0.00546 | 0.00000  |
| 173 | C10 | DXY | 0.02128  | 0.00131  | 0.00000  | -0.00196 | 0.00000  |
| 174 | C10 | DXZ | 0.00000  | 0.00000  | 0.00207  | 0.00000  | -0.00237 |
| 175 | C10 | DYZ | 0.00000  | 0.00000  | -0.01807 | 0.00000  | 0.03120  |
| 176 | H16 | S   | -0.15906 | -0.02875 | 0.00000  | 0.00884  | 0.00000  |
| 177 | H16 | S   | -0.44672 | -0.00905 | 0.00000  | -0.12542 | 0.00000  |
| 178 | H16 | PX  | -0.00208 | -0.00307 | 0.00000  | -0.00782 | 0.00000  |
| 179 | H16 | PY  | -0.00531 | 0.00737  | 0.00000  | 0.00230  | 0.00000  |
| 180 | H16 | PZ  | 0.00000  | 0.00000  | -0.00309 | 0.00000  | 0.00971  |
| 181 | H18 | S   | -0.04325 | 0.00760  | 0.00000  | -0.01869 | 0.00000  |
| 182 | H18 | S   | 0.10096  | -0.15283 | 0.00000  | 0.03448  | 0.00000  |
| 183 | H18 | PX  | 0.01341  | 0.00378  | 0.00000  | 0.00668  | 0.00000  |
| 184 | H18 | PY  | 0.00313  | 0.00415  | 0.00000  | 0.00689  | 0.00000  |
| 185 | H18 | PZ  | 0.00000  | 0.00000  | -0.00523 | 0.00000  | 0.01258  |

MO:

61

62

63

64

65

|              |          |          |          |          |          |
|--------------|----------|----------|----------|----------|----------|
| Eigenvalues: | 0.76851  | 0.78593  | 0.79889  | 0.80783  | 0.82464  |
| (ev):        | 20.91219 | 21.38635 | 21.73883 | 21.98228 | 22.43952 |

|    |    | A   | A        | A        | A        | A        |          |
|----|----|-----|----------|----------|----------|----------|----------|
| 1  | H1 | S   | 0.05991  | -0.11608 | 0.29890  | 0.00000  | 0.01014  |
| 2  | H1 | S   | -0.12974 | 0.02067  | 0.14356  | 0.00000  | 0.10166  |
| 3  | H1 | PX  | 0.00120  | -0.01357 | 0.02172  | 0.00000  | 0.00253  |
| 4  | H1 | PY  | 0.00949  | -0.00180 | -0.00779 | 0.00000  | 0.00281  |
| 5  | H1 | PZ  | 0.00000  | 0.00000  | 0.00000  | -0.00107 | 0.00000  |
| 6  | C1 | S   | 0.03518  | 0.01230  | 0.05679  | 0.00000  | 0.00030  |
| 7  | C1 | S   | -0.21685 | -0.34114 | 0.33078  | 0.00000  | 0.24981  |
| 8  | C1 | PX  | 0.15041  | 0.12373  | 0.07385  | 0.00000  | -0.07491 |
| 9  | C1 | PY  | 0.26805  | -0.18307 | 0.21346  | 0.00000  | 0.18075  |
| 10 | C1 | PZ  | 0.00000  | 0.00000  | 0.00000  | -0.58788 | 0.00000  |
| 11 | C1 | S   | 0.67258  | -0.09028 | -0.64051 | 0.00000  | -0.05614 |
| 12 | C1 | PX  | -0.17656 | 0.02005  | -0.04877 | 0.00000  | -0.11725 |
| 13 | C1 | PY  | 2.03758  | 0.24443  | -0.41225 | 0.00000  | 0.69911  |
| 14 | C1 | PZ  | 0.00000  | 0.00000  | 0.00000  | 0.59310  | 0.00000  |
| 15 | C1 | DXX | -0.00156 | -0.06352 | 0.09283  | 0.00000  | 0.02034  |
| 16 | C1 | DYY | 0.01995  | -0.01416 | 0.09836  | 0.00000  | 0.03849  |
| 17 | C1 | DZZ | -0.03213 | 0.00360  | -0.04732 | 0.00000  | -0.00515 |
| 18 | C1 | DXY | 0.00483  | -0.03832 | -0.01021 | 0.00000  | 0.01545  |
| 19 | C1 | DXZ | 0.00000  | 0.00000  | 0.00000  | 0.03802  | 0.00000  |
| 20 | C1 | DYZ | 0.00000  | 0.00000  | 0.00000  | -0.00590 | 0.00000  |
| 21 | C2 | S   | -0.02432 | 0.01250  | -0.01235 | 0.00000  | 0.00038  |
| 22 | C2 | S   | 0.23309  | -0.13136 | -0.44045 | 0.00000  | -0.00872 |
| 23 | C2 | PX  | 0.14915  | -0.08899 | -0.14426 | 0.00000  | 0.02245  |
| 24 | C2 | PY  | -0.20283 | 0.37291  | -0.04284 | 0.00000  | 0.11482  |
| 25 | C2 | PZ  | 0.00000  | 0.00000  | 0.00000  | 0.52192  | 0.00000  |
| 26 | C2 | S   | -0.95006 | 0.51333  | 0.51529  | 0.00000  | -0.50906 |
| 27 | C2 | PX  | -0.26676 | 0.06782  | 0.15930  | 0.00000  | -0.53367 |
| 28 | C2 | PY  | -2.09369 | -0.56957 | 0.25999  | 0.00000  | -0.70642 |
| 29 | C2 | PZ  | 0.00000  | 0.00000  | 0.00000  | -0.45809 | 0.00000  |
| 30 | C2 | DXX | 0.01495  | 0.00506  | -0.05273 | 0.00000  | 0.00287  |
| 31 | C2 | DYY | -0.01207 | 0.00797  | -0.07586 | 0.00000  | -0.03393 |
| 32 | C2 | DZZ | 0.02464  | -0.02008 | 0.00905  | 0.00000  | 0.00424  |
| 33 | C2 | DXY | 0.00348  | -0.01290 | 0.00779  | 0.00000  | -0.03250 |
| 34 | C2 | DXZ | 0.00000  | 0.00000  | 0.00000  | 0.03776  | 0.00000  |
| 35 | C2 | DYZ | 0.00000  | 0.00000  | 0.00000  | 0.01545  | 0.00000  |
| 36 | C3 | S   | -0.04843 | 0.00073  | -0.02539 | 0.00000  | 0.02110  |
| 37 | C3 | S   | 0.02213  | -0.11342 | 0.30004  | 0.00000  | -0.34889 |
| 38 | C3 | PX  | 0.15506  | 0.22695  | 0.32955  | 0.00000  | 0.16207  |
| 39 | C3 | PY  | 0.21968  | -0.13916 | -0.00934 | 0.00000  | 0.26772  |
| 40 | C3 | PZ  | 0.00000  | 0.00000  | 0.00000  | -0.17567 | 0.00000  |
| 41 | C3 | S   | -0.13548 | 0.83370  | 0.37374  | 0.00000  | -0.37391 |
| 42 | C3 | PX  | 2.01321  | 0.46891  | -0.22206 | 0.00000  | 0.79824  |
| 43 | C3 | PY  | 0.65258  | -0.32778 | -0.28075 | 0.00000  | 0.51970  |
| 44 | C3 | PZ  | 0.00000  | 0.00000  | 0.00000  | 0.05192  | 0.00000  |
| 45 | C3 | DXX | -0.01428 | 0.03113  | 0.04425  | 0.00000  | -0.03397 |
| 46 | C3 | DYY | -0.06752 | -0.02452 | 0.00152  | 0.00000  | -0.03018 |
| 47 | C3 | DZZ | 0.03503  | -0.01532 | 0.00423  | 0.00000  | -0.00536 |
| 48 | C3 | DXY | -0.00181 | 0.00882  | -0.02496 | 0.00000  | -0.00983 |
| 49 | C3 | DXZ | 0.00000  | 0.00000  | 0.00000  | -0.00633 | 0.00000  |
| 50 | C3 | DYZ | 0.00000  | 0.00000  | 0.00000  | -0.00382 | 0.00000  |



|     |    |     |          |          |          |          |          |
|-----|----|-----|----------|----------|----------|----------|----------|
| 51  | C4 | S   | -0.03276 | -0.06260 | 0.02417  | 0.00000  | 0.03767  |
| 52  | C4 | S   | 0.14778  | -0.21561 | 0.16713  | 0.00000  | 0.36071  |
| 53  | C4 | PX  | -0.17058 | -0.10221 | 0.47489  | 0.00000  | -0.05910 |
| 54  | C4 | PY  | -0.06217 | -0.05891 | -0.15641 | 0.00000  | 0.00090  |
| 55  | C4 | PZ  | 0.00000  | 0.00000  | 0.00000  | -0.13304 | 0.00000  |
| 56  | C4 | S   | -0.23467 | 0.48432  | -0.01888 | 0.00000  | -0.94272 |
| 57  | C4 | PX  | -2.25359 | 0.10827  | -0.43034 | 0.00000  | -0.53566 |
| 58  | C4 | PY  | 0.87726  | -0.26304 | 0.08399  | 0.00000  | 0.56644  |
| 59  | C4 | PZ  | 0.00000  | 0.00000  | 0.00000  | 0.15664  | 0.00000  |
| 60  | C4 | DXX | -0.00410 | -0.09848 | 0.05014  | 0.00000  | 0.08308  |
| 61  | C4 | DYY | -0.01067 | -0.08195 | 0.03831  | 0.00000  | 0.06555  |
| 62  | C4 | DZZ | 0.02544  | 0.05163  | -0.03002 | 0.00000  | -0.02827 |
| 63  | C4 | DXY | -0.00859 | -0.00233 | 0.02950  | 0.00000  | -0.01393 |
| 64  | C4 | DXZ | 0.00000  | 0.00000  | 0.00000  | -0.02396 | 0.00000  |
| 65  | C4 | DYZ | 0.00000  | 0.00000  | 0.00000  | 0.04343  | 0.00000  |
| 66  | C5 | S   | 0.03643  | 0.03050  | -0.03962 | 0.00000  | 0.00419  |
| 67  | C5 | S   | -0.11399 | -0.20239 | -0.17951 | 0.00000  | 0.21878  |
| 68  | C5 | PX  | -0.18873 | -0.35786 | 0.19478  | 0.00000  | 0.18830  |
| 69  | C5 | PY  | 0.03706  | -0.07840 | 0.09287  | 0.00000  | 0.09043  |
| 70  | C5 | PZ  | 0.00000  | 0.00000  | 0.00000  | 0.34910  | 0.00000  |
| 71  | C5 | S   | 0.31822  | 0.18796  | 0.00758  | 0.00000  | 0.20500  |
| 72  | C5 | PX  | -2.17471 | 0.26392  | -0.09872 | 0.00000  | -0.58656 |
| 73  | C5 | PY  | -1.09997 | 0.38681  | -0.10993 | 0.00000  | -0.82696 |
| 74  | C5 | PZ  | 0.00000  | 0.00000  | 0.00000  | -0.36986 | 0.00000  |
| 75  | C5 | DXX | 0.01048  | 0.01401  | -0.08805 | 0.00000  | 0.04865  |
| 76  | C5 | DYY | 0.02344  | -0.01159 | -0.03673 | 0.00000  | 0.04422  |
| 77  | C5 | DZZ | -0.02968 | -0.02197 | 0.03535  | 0.00000  | -0.01261 |
| 78  | C5 | DXY | -0.01620 | 0.01461  | -0.01332 | 0.00000  | 0.02549  |
| 79  | C5 | DXZ | 0.00000  | 0.00000  | 0.00000  | -0.00789 | 0.00000  |
| 80  | C5 | DYZ | 0.00000  | 0.00000  | 0.00000  | -0.04401 | 0.00000  |
| 81  | C6 | S   | 0.04094  | -0.03681 | -0.01770 | 0.00000  | -0.01616 |
| 82  | C6 | S   | 0.02709  | -0.07084 | -0.21298 | 0.00000  | -0.31150 |
| 83  | C6 | PX  | 0.10103  | 0.16601  | 0.08935  | 0.00000  | 0.21875  |
| 84  | C6 | PY  | -0.23438 | 0.17793  | -0.06928 | 0.00000  | 0.27008  |
| 85  | C6 | PZ  | 0.00000  | 0.00000  | 0.00000  | 0.19291  | 0.00000  |
| 86  | C6 | S   | -0.35749 | -0.21110 | 0.39940  | 0.00000  | 0.56985  |
| 87  | C6 | PX  | 2.16678  | 0.35271  | -0.29014 | 0.00000  | 0.75836  |
| 88  | C6 | PY  | 0.06968  | 0.05423  | -0.06311 | 0.00000  | 0.00004  |
| 89  | C6 | PZ  | 0.00000  | 0.00000  | 0.00000  | -0.16094 | 0.00000  |
| 90  | C6 | DXX | 0.00014  | -0.04478 | -0.04952 | 0.00000  | -0.07967 |
| 91  | C6 | DYY | 0.06388  | -0.03907 | -0.02456 | 0.00000  | -0.00960 |
| 92  | C6 | DZZ | -0.02595 | 0.02545  | 0.00944  | 0.00000  | 0.01055  |
| 93  | C6 | DXY | -0.00708 | 0.03447  | 0.01812  | 0.00000  | 0.00545  |
| 94  | C6 | DXZ | 0.00000  | 0.00000  | 0.00000  | -0.01418 | 0.00000  |
| 95  | C6 | DYZ | 0.00000  | 0.00000  | 0.00000  | 0.00633  | 0.00000  |
| 96  | C7 | S   | -0.00847 | 0.02062  | 0.04291  | 0.00000  | -0.07327 |
| 97  | C7 | S   | -0.02395 | 0.32289  | 0.31458  | 0.00000  | -0.21496 |
| 98  | C7 | PX  | -0.08102 | -0.12998 | -0.00519 | 0.00000  | -0.09502 |
| 99  | C7 | PY  | -0.37477 | -0.16599 | -0.03836 | 0.00000  | -0.09360 |
| 100 | C7 | PZ  | 0.00000  | 0.00000  | 0.00000  | -0.37253 | 0.00000  |
| 101 | C7 | S   | 0.45781  | -0.96314 | -0.93216 | 0.00000  | 1.37585  |
| 102 | C7 | PX  | -1.12290 | 0.09062  | 0.17322  | 0.00000  | -0.83369 |
| 103 | C7 | PY  | -0.05217 | -0.66754 | -0.44091 | 0.00000  | -0.02639 |
| 104 | C7 | PZ  | 0.00000  | 0.00000  | 0.00000  | 0.45915  | 0.00000  |

|     |    |     |          |          |          |          |          |
|-----|----|-----|----------|----------|----------|----------|----------|
| 105 | C7 | DXX | -0.01951 | 0.06174  | 0.06971  | 0.00000  | -0.08984 |
| 106 | C7 | DYY | 0.01966  | 0.04396  | 0.06946  | 0.00000  | -0.07757 |
| 107 | C7 | DZZ | 0.01182  | -0.00930 | -0.02655 | 0.00000  | 0.05414  |
| 108 | C7 | DXY | 0.02986  | -0.01744 | -0.00031 | 0.00000  | -0.00523 |
| 109 | C7 | DXZ | 0.00000  | 0.00000  | 0.00000  | 0.02397  | 0.00000  |
| 110 | C7 | DYZ | 0.00000  | 0.00000  | 0.00000  | -0.00462 | 0.00000  |
| 111 | H3 | S   | -0.07233 | -0.26365 | 0.20688  | 0.00000  | 0.12707  |
| 112 | H3 | S   | 0.28680  | 0.10060  | 0.01279  | 0.00000  | 0.01806  |
| 113 | H3 | PX  | -0.01079 | -0.01072 | 0.00341  | 0.00000  | 0.00650  |
| 114 | H3 | PY  | 0.00062  | -0.01843 | 0.01285  | 0.00000  | 0.01273  |
| 115 | H3 | PZ  | 0.00000  | 0.00000  | 0.00000  | 0.00736  | 0.00000  |
| 116 | H4 | S   | 0.10487  | 0.03775  | -0.10384 | 0.00000  | 0.02256  |
| 117 | H4 | S   | -0.29569 | -0.12719 | -0.01740 | 0.00000  | 0.26542  |
| 118 | H4 | PX  | -0.01109 | 0.00634  | 0.01296  | 0.00000  | -0.00227 |
| 119 | H4 | PY  | 0.00297  | 0.00551  | -0.00784 | 0.00000  | 0.00004  |
| 120 | H4 | PZ  | 0.00000  | 0.00000  | 0.00000  | -0.00496 | 0.00000  |
| 121 | N1 | S   | -0.00680 | -0.00637 | 0.00814  | 0.00000  | -0.01573 |
| 122 | N1 | S   | 0.03420  | -0.01260 | -0.03536 | 0.00000  | 0.06548  |
| 123 | N1 | PX  | 0.11476  | 0.00270  | 0.00582  | 0.00000  | 0.04804  |
| 124 | N1 | PY  | 0.17776  | -0.07229 | 0.02057  | 0.00000  | -0.08110 |
| 125 | N1 | PZ  | 0.00000  | 0.00000  | 0.00000  | 0.13991  | 0.00000  |
| 126 | N1 | S   | 0.25704  | 0.28200  | -0.24964 | 0.00000  | -0.12299 |
| 127 | N1 | PX  | -0.42401 | -0.01856 | -0.04361 | 0.00000  | -0.27302 |
| 128 | N1 | PY  | 0.45209  | 0.36673  | -0.13182 | 0.00000  | 0.57814  |
| 129 | N1 | PZ  | 0.00000  | 0.00000  | 0.00000  | -0.04811 | 0.00000  |
| 130 | N1 | DXX | -0.01365 | 0.01799  | -0.00087 | 0.00000  | 0.03370  |
| 131 | N1 | DYY | -0.00675 | -0.00684 | -0.01325 | 0.00000  | -0.05185 |
| 132 | N1 | DZZ | -0.00883 | -0.01702 | -0.00446 | 0.00000  | 0.03299  |
| 133 | N1 | DXY | 0.04645  | -0.02843 | -0.00342 | 0.00000  | -0.01304 |
| 134 | N1 | DXZ | 0.00000  | 0.00000  | 0.00000  | 0.02228  | 0.00000  |
| 135 | N1 | DYZ | 0.00000  | 0.00000  | 0.00000  | 0.01015  | 0.00000  |
| 136 | H6 | S   | -0.01219 | 0.04159  | -0.05781 | 0.00000  | -0.03581 |
| 137 | H6 | S   | -0.00984 | -0.08132 | -0.11236 | 0.00000  | -0.32330 |
| 138 | H6 | PX  | -0.00139 | -0.00239 | 0.01533  | 0.00000  | 0.00079  |
| 139 | H6 | PY  | -0.00615 | -0.00417 | 0.00364  | 0.00000  | 0.00101  |
| 140 | H6 | PZ  | 0.00000  | 0.00000  | 0.00000  | 0.00086  | 0.00000  |
| 141 | C8 | S   | 0.02530  | 0.03682  | 0.00070  | 0.00000  | 0.06703  |
| 142 | C8 | S   | -0.05389 | 0.50258  | 0.34689  | 0.00000  | -0.13366 |
| 143 | C8 | PX  | 0.15586  | -0.12928 | 0.09555  | 0.00000  | -0.36102 |
| 144 | C8 | PY  | -0.05744 | 0.04710  | 0.04662  | 0.00000  | -0.08220 |
| 145 | C8 | PZ  | 0.00000  | 0.00000  | 0.00000  | 0.16039  | 0.00000  |
| 146 | C8 | S   | -0.18596 | -1.02517 | -0.47459 | 0.00000  | -0.51090 |
| 147 | C8 | PX  | -1.09166 | -0.19790 | -0.10899 | 0.00000  | -0.66399 |
| 148 | C8 | PY  | -0.34133 | 0.33978  | 0.26550  | 0.00000  | 0.13407  |
| 149 | C8 | PZ  | 0.00000  | 0.00000  | 0.00000  | -0.22468 | 0.00000  |
| 150 | C8 | DXX | 0.02613  | 0.06572  | 0.03360  | 0.00000  | -0.01821 |
| 151 | C8 | DYY | 0.01399  | 0.09046  | 0.03951  | 0.00000  | 0.06569  |
| 152 | C8 | DZZ | -0.01855 | -0.01671 | 0.00292  | 0.00000  | -0.03456 |
| 153 | C8 | DXY | 0.01417  | 0.02237  | 0.00703  | 0.00000  | -0.00203 |
| 154 | C8 | DXZ | 0.00000  | 0.00000  | 0.00000  | -0.02153 | 0.00000  |
| 155 | C8 | DYZ | 0.00000  | 0.00000  | 0.00000  | -0.03083 | 0.00000  |
| 156 | H8 | S   | -0.03991 | 0.14197  | 0.21492  | 0.00000  | -0.23416 |
| 157 | H8 | S   | 0.67699  | -0.08312 | -0.08339 | 0.00000  | 0.36346  |
| 158 | H8 | PX  | -0.00998 | 0.00958  | 0.01275  | 0.00000  | -0.02520 |

|     |     |     |          |          |          |          |          |
|-----|-----|-----|----------|----------|----------|----------|----------|
| 159 | H8  | PY  | 0.00609  | -0.01824 | -0.01772 | 0.00000  | 0.00061  |
| 160 | H8  | PZ  | 0.00000  | 0.00000  | 0.00000  | -0.00007 | 0.00000  |
| 161 | C10 | S   | -0.00641 | 0.00398  | 0.00904  | 0.00000  | -0.02119 |
| 162 | C10 | S   | 0.04377  | 0.39121  | 0.17676  | 0.00000  | 0.27140  |
| 163 | C10 | PX  | 0.13453  | 0.00494  | 0.04535  | 0.00000  | -0.16104 |
| 164 | C10 | PY  | 0.02747  | 0.19926  | 0.02907  | 0.00000  | 0.37758  |
| 165 | C10 | PZ  | 0.00000  | 0.00000  | 0.00000  | 0.34115  | 0.00000  |
| 166 | C10 | S   | -0.24455 | -0.17521 | -0.04456 | 0.00000  | -0.05458 |
| 167 | C10 | PX  | -0.03174 | 0.17312  | -0.08448 | 0.00000  | 0.83573  |
| 168 | C10 | PY  | -0.20942 | 0.17637  | 0.15154  | 0.00000  | -0.30384 |
| 169 | C10 | PZ  | 0.00000  | 0.00000  | 0.00000  | -0.30962 | 0.00000  |
| 170 | C10 | DXX | -0.01142 | 0.06902  | 0.03575  | 0.00000  | 0.01958  |
| 171 | C10 | DYY | 0.00155  | 0.03582  | 0.02595  | 0.00000  | -0.00213 |
| 172 | C10 | DZZ | 0.00465  | -0.00774 | -0.00954 | 0.00000  | 0.02194  |
| 173 | C10 | DXY | -0.05385 | -0.01824 | -0.01393 | 0.00000  | -0.00442 |
| 174 | C10 | DXZ | 0.00000  | 0.00000  | 0.00000  | 0.00760  | 0.00000  |
| 175 | C10 | DYZ | 0.00000  | 0.00000  | 0.00000  | 0.01940  | 0.00000  |
| 176 | H16 | S   | 0.16347  | 0.14141  | 0.12804  | 0.00000  | -0.11169 |
| 177 | H16 | S   | -0.15679 | -0.03245 | 0.04932  | 0.00000  | -0.38744 |
| 178 | H16 | PX  | -0.01158 | 0.01554  | 0.00217  | 0.00000  | 0.02350  |
| 179 | H16 | PY  | -0.01642 | -0.00629 | -0.00842 | 0.00000  | -0.00004 |
| 180 | H16 | PZ  | 0.00000  | 0.00000  | 0.00000  | 0.00567  | 0.00000  |
| 181 | H18 | S   | -0.21554 | 0.10435  | 0.02761  | 0.00000  | 0.05325  |
| 182 | H18 | S   | 0.08728  | 0.25657  | 0.03090  | 0.00000  | 0.42769  |
| 183 | H18 | PX  | -0.00379 | -0.01009 | -0.00833 | 0.00000  | 0.00776  |
| 184 | H18 | PY  | 0.01935  | -0.00598 | 0.00054  | 0.00000  | -0.00079 |
| 185 | H18 | PZ  | 0.00000  | 0.00000  | 0.00000  | 0.00229  | 0.00000  |

|              |          |          |          |          |          |
|--------------|----------|----------|----------|----------|----------|
| MO:          | 66       | 67       | 68       | 69       | 70       |
| Eigenvalues: | 0.83599  | 0.83701  | 0.87468  | 0.88089  | 0.89452  |
| (ev):        | 22.74835 | 22.77633 | 23.80135 | 23.97035 | 24.34108 |

|    |    | A   | A        | A        | A        | A        |          |
|----|----|-----|----------|----------|----------|----------|----------|
| 1  | H1 | S   | 0.00000  | 0.20055  | 0.00000  | 0.14232  | 0.00000  |
| 2  | H1 | S   | 0.00000  | -0.11086 | 0.00000  | -0.14291 | 0.00000  |
| 3  | H1 | PX  | 0.00000  | 0.00531  | 0.00000  | 0.01066  | 0.00000  |
| 4  | H1 | PY  | 0.00000  | 0.00166  | 0.00000  | -0.00683 | 0.00000  |
| 5  | H1 | PZ  | -0.00546 | 0.00000  | 0.00406  | 0.00000  | -0.00071 |
| 6  | C1 | S   | 0.00000  | 0.02281  | 0.00000  | 0.05224  | 0.00000  |
| 7  | C1 | S   | 0.00000  | -0.10687 | 0.00000  | -0.02612 | 0.00000  |
| 8  | C1 | PX  | 0.00000  | 0.15149  | 0.00000  | 0.11407  | 0.00000  |
| 9  | C1 | PY  | 0.00000  | 0.07182  | 0.00000  | -0.09651 | 0.00000  |
| 10 | C1 | PZ  | 0.16669  | 0.00000  | -0.01395 | 0.00000  | 0.52113  |
| 11 | C1 | S   | 0.00000  | -0.28064 | 0.00000  | -0.50442 | 0.00000  |
| 12 | C1 | PX  | 0.00000  | -0.00263 | 0.00000  | 0.27558  | 0.00000  |
| 13 | C1 | PY  | 0.00000  | -0.99505 | 0.00000  | -0.31963 | 0.00000  |
| 14 | C1 | PZ  | -0.15049 | 0.00000  | -0.07650 | 0.00000  | -0.73907 |
| 15 | C1 | DXX | 0.00000  | 0.03634  | 0.00000  | 0.03473  | 0.00000  |
| 16 | C1 | DYY | 0.00000  | -0.02185 | 0.00000  | 0.06406  | 0.00000  |
| 17 | C1 | DZZ | 0.00000  | -0.02489 | 0.00000  | -0.04050 | 0.00000  |
| 18 | C1 | DXY | 0.00000  | 0.01447  | 0.00000  | -0.01660 | 0.00000  |
| 19 | C1 | DXZ | -0.02963 | 0.00000  | 0.01591  | 0.00000  | -0.01003 |
| 20 | C1 | DYZ | 0.03202  | 0.00000  | 0.00543  | 0.00000  | -0.01361 |
| 21 | C2 | S   | 0.00000  | -0.00282 | 0.00000  | 0.05035  | 0.00000  |

|    |    |     |          |          |          |          |          |
|----|----|-----|----------|----------|----------|----------|----------|
| 22 | C2 | S   | 0.00000  | 0.32734  | 0.00000  | 0.04501  | 0.00000  |
| 23 | C2 | PX  | 0.00000  | -0.02360 | 0.00000  | -0.09239 | 0.00000  |
| 24 | C2 | PY  | 0.00000  | 0.20807  | 0.00000  | -0.10213 | 0.00000  |
| 25 | C2 | PZ  | -0.27576 | 0.00000  | 0.17101  | 0.00000  | 0.55619  |
| 26 | C2 | S   | 0.00000  | 0.54544  | 0.00000  | -0.33323 | 0.00000  |
| 27 | C2 | PX  | 0.00000  | 0.83284  | 0.00000  | -0.17832 | 0.00000  |
| 28 | C2 | PY  | 0.00000  | 1.53212  | 0.00000  | 0.20514  | 0.00000  |
| 29 | C2 | PZ  | 0.26295  | 0.00000  | -0.27645 | 0.00000  | -0.80710 |
| 30 | C2 | DXX | 0.00000  | 0.06294  | 0.00000  | 0.03290  | 0.00000  |
| 31 | C2 | DYY | 0.00000  | 0.03194  | 0.00000  | 0.08164  | 0.00000  |
| 32 | C2 | DZZ | 0.00000  | -0.00554 | 0.00000  | -0.03814 | 0.00000  |
| 33 | C2 | DXY | 0.00000  | -0.01728 | 0.00000  | 0.01187  | 0.00000  |
| 34 | C2 | DXZ | -0.01613 | 0.00000  | 0.03340  | 0.00000  | 0.00266  |
| 35 | C2 | DYZ | 0.02251  | 0.00000  | 0.03468  | 0.00000  | -0.01284 |
| 36 | C3 | S   | 0.00000  | -0.06709 | 0.00000  | -0.01104 | 0.00000  |
| 37 | C3 | S   | 0.00000  | -0.15839 | 0.00000  | 0.09521  | 0.00000  |
| 38 | C3 | PX  | 0.00000  | 0.11752  | 0.00000  | 0.06427  | 0.00000  |
| 39 | C3 | PY  | 0.00000  | -0.04420 | 0.00000  | 0.21209  | 0.00000  |
| 40 | C3 | PZ  | -0.30209 | 0.00000  | -0.12239 | 0.00000  | -0.07142 |
| 41 | C3 | S   | 0.00000  | 1.54306  | 0.00000  | 0.02160  | 0.00000  |
| 42 | C3 | PX  | 0.00000  | -1.32054 | 0.00000  | -0.34329 | 0.00000  |
| 43 | C3 | PY  | 0.00000  | -0.84248 | 0.00000  | -0.17328 | 0.00000  |
| 44 | C3 | PZ  | 0.26232  | 0.00000  | 0.09488  | 0.00000  | 0.16903  |
| 45 | C3 | DXX | 0.00000  | -0.09110 | 0.00000  | -0.00772 | 0.00000  |
| 46 | C3 | DYY | 0.00000  | -0.04627 | 0.00000  | 0.02279  | 0.00000  |
| 47 | C3 | DZZ | 0.00000  | 0.04646  | 0.00000  | 0.00729  | 0.00000  |
| 48 | C3 | DXY | 0.00000  | -0.00364 | 0.00000  | -0.00348 | 0.00000  |
| 49 | C3 | DXZ | 0.01060  | 0.00000  | 0.00603  | 0.00000  | -0.00662 |
| 50 | C3 | DYZ | 0.02013  | 0.00000  | -0.04260 | 0.00000  | 0.02935  |
| 51 | C4 | S   | 0.00000  | -0.00608 | 0.00000  | -0.04227 | 0.00000  |
| 52 | C4 | S   | 0.00000  | 0.38371  | 0.00000  | -0.11712 | 0.00000  |
| 53 | C4 | PX  | 0.00000  | -0.16223 | 0.00000  | 0.26490  | 0.00000  |
| 54 | C4 | PY  | 0.00000  | 0.02338  | 0.00000  | -0.19198 | 0.00000  |
| 55 | C4 | PZ  | 0.57755  | 0.00000  | -0.32873 | 0.00000  | -0.33756 |
| 56 | C4 | S   | 0.00000  | -0.36671 | 0.00000  | 0.61047  | 0.00000  |
| 57 | C4 | PX  | 0.00000  | 1.00015  | 0.00000  | 0.07520  | 0.00000  |
| 58 | C4 | PY  | 0.00000  | -0.86988 | 0.00000  | -0.19017 | 0.00000  |
| 59 | C4 | PZ  | -0.61064 | 0.00000  | 0.52083  | 0.00000  | 0.42013  |
| 60 | C4 | DXX | 0.00000  | 0.02924  | 0.00000  | -0.05101 | 0.00000  |
| 61 | C4 | DYY | 0.00000  | 0.07328  | 0.00000  | -0.07426 | 0.00000  |
| 62 | C4 | DZZ | 0.00000  | 0.00036  | 0.00000  | 0.03522  | 0.00000  |
| 63 | C4 | DXY | 0.00000  | 0.03448  | 0.00000  | 0.01735  | 0.00000  |
| 64 | C4 | DXZ | -0.01772 | 0.00000  | -0.01448 | 0.00000  | 0.04242  |
| 65 | C4 | DYZ | -0.03650 | 0.00000  | -0.00259 | 0.00000  | -0.00950 |
| 66 | C5 | S   | 0.00000  | 0.06061  | 0.00000  | -0.03861 | 0.00000  |
| 67 | C5 | S   | 0.00000  | 0.37205  | 0.00000  | -0.11149 | 0.00000  |
| 68 | C5 | PX  | 0.00000  | -0.07039 | 0.00000  | -0.24202 | 0.00000  |
| 69 | C5 | PY  | 0.00000  | 0.10652  | 0.00000  | -0.19766 | 0.00000  |
| 70 | C5 | PZ  | 0.18310  | 0.00000  | 0.53025  | 0.00000  | -0.49041 |
| 71 | C5 | S   | 0.00000  | -1.70309 | 0.00000  | 0.43218  | 0.00000  |
| 72 | C5 | PX  | 0.00000  | 1.29060  | 0.00000  | 0.40601  | 0.00000  |
| 73 | C5 | PY  | 0.00000  | 1.01284  | 0.00000  | 0.14072  | 0.00000  |
| 74 | C5 | PZ  | -0.12685 | 0.00000  | -0.67911 | 0.00000  | 0.65708  |

|     |    |     |          |          |          |          |          |
|-----|----|-----|----------|----------|----------|----------|----------|
| 75  | C5 | DXX | 0.00000  | 0.09289  | 0.00000  | -0.04702 | 0.00000  |
| 76  | C5 | DYY | 0.00000  | 0.10681  | 0.00000  | -0.07467 | 0.00000  |
| 77  | C5 | DZZ | 0.00000  | -0.05648 | 0.00000  | 0.03144  | 0.00000  |
| 78  | C5 | DXY | 0.00000  | -0.04313 | 0.00000  | -0.01582 | 0.00000  |
| 79  | C5 | DXZ | 0.03430  | 0.00000  | 0.00367  | 0.00000  | -0.04153 |
| 80  | C5 | DYZ | 0.00457  | 0.00000  | -0.03828 | 0.00000  | -0.01207 |
| 81  | C6 | S   | 0.00000  | -0.00495 | 0.00000  | 0.00123  | 0.00000  |
| 82  | C6 | S   | 0.00000  | -0.35410 | 0.00000  | 0.02761  | 0.00000  |
| 83  | C6 | PX  | 0.00000  | -0.43917 | 0.00000  | -0.19788 | 0.00000  |
| 84  | C6 | PY  | 0.00000  | 0.01311  | 0.00000  | 0.24924  | 0.00000  |
| 85  | C6 | PZ  | -0.39316 | 0.00000  | -0.56031 | 0.00000  | -0.04509 |
| 86  | C6 | S   | 0.00000  | 0.71989  | 0.00000  | 0.00188  | 0.00000  |
| 87  | C6 | PX  | 0.00000  | -1.30302 | 0.00000  | 0.00726  | 0.00000  |
| 88  | C6 | PY  | 0.00000  | -0.41065 | 0.00000  | -0.08424 | 0.00000  |
| 89  | C6 | PZ  | 0.33809  | 0.00000  | 0.79605  | 0.00000  | 0.17120  |
| 90  | C6 | DXX | 0.00000  | -0.07410 | 0.00000  | 0.00325  | 0.00000  |
| 91  | C6 | DYY | 0.00000  | -0.03062 | 0.00000  | 0.02403  | 0.00000  |
| 92  | C6 | DZZ | 0.00000  | 0.00703  | 0.00000  | -0.00430 | 0.00000  |
| 93  | C6 | DXY | 0.00000  | 0.00666  | 0.00000  | -0.00514 | 0.00000  |
| 94  | C6 | DXZ | -0.00328 | 0.00000  | -0.00138 | 0.00000  | 0.00345  |
| 95  | C6 | DYZ | -0.02061 | 0.00000  | 0.02021  | 0.00000  | 0.00633  |
| 96  | C7 | S   | 0.00000  | 0.05248  | 0.00000  | -0.00212 | 0.00000  |
| 97  | C7 | S   | 0.00000  | -0.05708 | 0.00000  | -0.00320 | 0.00000  |
| 98  | C7 | PX  | 0.00000  | 0.06606  | 0.00000  | -0.04018 | 0.00000  |
| 99  | C7 | PY  | 0.00000  | -0.04466 | 0.00000  | 0.01517  | 0.00000  |
| 100 | C7 | PZ  | -0.36241 | 0.00000  | 0.52867  | 0.00000  | -0.21095 |
| 101 | C7 | S   | 0.00000  | -1.42772 | 0.00000  | -0.01715 | 0.00000  |
| 102 | C7 | PX  | 0.00000  | 1.13778  | 0.00000  | 0.27458  | 0.00000  |
| 103 | C7 | PY  | 0.00000  | -0.19293 | 0.00000  | -0.00754 | 0.00000  |
| 104 | C7 | PZ  | 0.33142  | 0.00000  | -0.79236 | 0.00000  | 0.07472  |
| 105 | C7 | DXX | 0.00000  | 0.02924  | 0.00000  | 0.03616  | 0.00000  |
| 106 | C7 | DYY | 0.00000  | 0.00599  | 0.00000  | -0.04151 | 0.00000  |
| 107 | C7 | DZZ | 0.00000  | -0.01575 | 0.00000  | 0.00180  | 0.00000  |
| 108 | C7 | DXY | 0.00000  | -0.02913 | 0.00000  | -0.01761 | 0.00000  |
| 109 | C7 | DXZ | 0.01769  | 0.00000  | -0.03219 | 0.00000  | 0.00798  |
| 110 | C7 | DYZ | -0.00664 | 0.00000  | 0.00908  | 0.00000  | -0.00156 |
| 111 | H3 | S   | 0.00000  | 0.19336  | 0.00000  | -0.17011 | 0.00000  |
| 112 | H3 | S   | 0.00000  | 0.19096  | 0.00000  | 0.05687  | 0.00000  |
| 113 | H3 | PX  | 0.00000  | 0.00694  | 0.00000  | -0.00434 | 0.00000  |
| 114 | H3 | PY  | 0.00000  | 0.00892  | 0.00000  | -0.01328 | 0.00000  |
| 115 | H3 | PZ  | -0.00246 | 0.00000  | -0.00398 | 0.00000  | -0.00016 |
| 116 | H4 | S   | 0.00000  | 0.40178  | 0.00000  | -0.16205 | 0.00000  |
| 117 | H4 | S   | 0.00000  | -0.08079 | 0.00000  | 0.04049  | 0.00000  |
| 118 | H4 | PX  | 0.00000  | -0.00888 | 0.00000  | 0.00756  | 0.00000  |
| 119 | H4 | PY  | 0.00000  | 0.02242  | 0.00000  | -0.01093 | 0.00000  |
| 120 | H4 | PZ  | 0.00048  | 0.00000  | -0.00492 | 0.00000  | -0.00082 |
| 121 | N1 | S   | 0.00000  | 0.00915  | 0.00000  | -0.01488 | 0.00000  |
| 122 | N1 | S   | 0.00000  | 0.00693  | 0.00000  | 0.04598  | 0.00000  |
| 123 | N1 | PX  | 0.00000  | -0.00587 | 0.00000  | 0.07943  | 0.00000  |
| 124 | N1 | PY  | 0.00000  | -0.04256 | 0.00000  | -0.07013 | 0.00000  |
| 125 | N1 | PZ  | -0.06538 | 0.00000  | -0.18773 | 0.00000  | 0.06906  |
| 126 | N1 | S   | 0.00000  | -0.86845 | 0.00000  | -0.15173 | 0.00000  |
| 127 | N1 | PX  | 0.00000  | 0.00823  | 0.00000  | -0.08686 | 0.00000  |
| 128 | N1 | PY  | 0.00000  | -0.74596 | 0.00000  | 0.06801  | 0.00000  |

|     |     |     |          |          |          |          |          |
|-----|-----|-----|----------|----------|----------|----------|----------|
| 129 | N1  | PZ  | -0.01559 | 0.00000  | -0.06651 | 0.00000  | -0.21476 |
| 130 | N1  | DXX | 0.00000  | -0.02254 | 0.00000  | 0.00381  | 0.00000  |
| 131 | N1  | DYY | 0.00000  | -0.01756 | 0.00000  | -0.04320 | 0.00000  |
| 132 | N1  | DZZ | 0.00000  | 0.03827  | 0.00000  | 0.02264  | 0.00000  |
| 133 | N1  | DXY | 0.00000  | 0.01318  | 0.00000  | 0.01978  | 0.00000  |
| 134 | N1  | DXZ | -0.01319 | 0.00000  | -0.03617 | 0.00000  | 0.00032  |
| 135 | N1  | DYZ | -0.00618 | 0.00000  | -0.02831 | 0.00000  | 0.00497  |
| 136 | H6  | S   | 0.00000  | 0.19945  | 0.00000  | 0.13078  | 0.00000  |
| 137 | H6  | S   | 0.00000  | 0.43021  | 0.00000  | -0.07836 | 0.00000  |
| 138 | H6  | PX  | 0.00000  | -0.00596 | 0.00000  | -0.00886 | 0.00000  |
| 139 | H6  | PY  | 0.00000  | 0.00543  | 0.00000  | -0.00277 | 0.00000  |
| 140 | H6  | PZ  | -0.00085 | 0.00000  | -0.00928 | 0.00000  | 0.00251  |
| 141 | C8  | S   | 0.00000  | -0.00031 | 0.00000  | 0.05529  | 0.00000  |
| 142 | C8  | S   | 0.00000  | -0.01722 | 0.00000  | -0.44679 | 0.00000  |
| 143 | C8  | PX  | 0.00000  | 0.22020  | 0.00000  | 0.13866  | 0.00000  |
| 144 | C8  | PY  | 0.00000  | -0.07494 | 0.00000  | 0.22849  | 0.00000  |
| 145 | C8  | PZ  | -0.11181 | 0.00000  | -0.35690 | 0.00000  | -0.44388 |
| 146 | C8  | S   | 0.00000  | 0.35443  | 0.00000  | 0.26802  | 0.00000  |
| 147 | C8  | PX  | 0.00000  | 0.62351  | 0.00000  | -0.09761 | 0.00000  |
| 148 | C8  | PY  | 0.00000  | 0.81283  | 0.00000  | 0.24928  | 0.00000  |
| 149 | C8  | PZ  | 0.11319  | 0.00000  | 0.59988  | 0.00000  | 0.65560  |
| 150 | C8  | DXX | 0.00000  | -0.01768 | 0.00000  | -0.06711 | 0.00000  |
| 151 | C8  | DYY | 0.00000  | 0.01161  | 0.00000  | 0.08250  | 0.00000  |
| 152 | C8  | DZZ | 0.00000  | 0.00022  | 0.00000  | -0.03830 | 0.00000  |
| 153 | C8  | DXY | 0.00000  | -0.01543 | 0.00000  | -0.01328 | 0.00000  |
| 154 | C8  | DXZ | -0.00999 | 0.00000  | 0.02066  | 0.00000  | -0.00872 |
| 155 | C8  | DYZ | -0.04163 | 0.00000  | 0.01911  | 0.00000  | -0.01519 |
| 156 | H8  | S   | 0.00000  | 0.24636  | 0.00000  | 0.10738  | 0.00000  |
| 157 | H8  | S   | 0.00000  | -0.59047 | 0.00000  | -0.25350 | 0.00000  |
| 158 | H8  | PX  | 0.00000  | 0.01609  | 0.00000  | 0.01113  | 0.00000  |
| 159 | H8  | PY  | 0.00000  | -0.00899 | 0.00000  | -0.00444 | 0.00000  |
| 160 | H8  | PZ  | -0.00262 | 0.00000  | -0.00824 | 0.00000  | -0.00383 |
| 161 | C10 | S   | 0.00000  | 0.00397  | 0.00000  | -0.07419 | 0.00000  |
| 162 | C10 | S   | 0.00000  | 0.08857  | 0.00000  | -0.27981 | 0.00000  |
| 163 | C10 | PX  | 0.00000  | 0.06888  | 0.00000  | 0.03772  | 0.00000  |
| 164 | C10 | PY  | 0.00000  | 0.08145  | 0.00000  | 0.43199  | 0.00000  |
| 165 | C10 | PZ  | 0.56387  | 0.00000  | 0.08735  | 0.00000  | 0.34323  |
| 166 | C10 | S   | 0.00000  | 0.34978  | 0.00000  | 1.25121  | 0.00000  |
| 167 | C10 | PX  | 0.00000  | -0.43675 | 0.00000  | -0.06015 | 0.00000  |
| 168 | C10 | PY  | 0.00000  | 0.13665  | 0.00000  | -0.37254 | 0.00000  |
| 169 | C10 | PZ  | -0.60810 | 0.00000  | -0.20054 | 0.00000  | -0.52027 |
| 170 | C10 | DXX | 0.00000  | 0.02057  | 0.00000  | -0.09628 | 0.00000  |
| 171 | C10 | DYY | 0.00000  | 0.01595  | 0.00000  | -0.13795 | 0.00000  |
| 172 | C10 | DZZ | 0.00000  | -0.00171 | 0.00000  | 0.07351  | 0.00000  |
| 173 | C10 | DXY | 0.00000  | 0.02671  | 0.00000  | 0.02246  | 0.00000  |
| 174 | C10 | DXZ | 0.00511  | 0.00000  | -0.01296 | 0.00000  | 0.00410  |
| 175 | C10 | DYZ | 0.00615  | 0.00000  | -0.02530 | 0.00000  | -0.01495 |
| 176 | H16 | S   | 0.00000  | 0.00356  | 0.00000  | -0.39026 | 0.00000  |
| 177 | H16 | S   | 0.00000  | 0.29143  | 0.00000  | -0.03889 | 0.00000  |
| 178 | H16 | PX  | 0.00000  | -0.00251 | 0.00000  | -0.00818 | 0.00000  |
| 179 | H16 | PY  | 0.00000  | 0.00043  | 0.00000  | 0.01575  | 0.00000  |
| 180 | H16 | PZ  | 0.00959  | 0.00000  | 0.00064  | 0.00000  | 0.00519  |
| 181 | H18 | S   | 0.00000  | 0.04317  | 0.00000  | -0.31767 | 0.00000  |
| 182 | H18 | S   | 0.00000  | -0.27906 | 0.00000  | -0.22393 | 0.00000  |

|     |     |    |         |          |         |         |         |
|-----|-----|----|---------|----------|---------|---------|---------|
| 183 | H18 | PX | 0.00000 | -0.01317 | 0.00000 | 0.00337 | 0.00000 |
| 184 | H18 | PY | 0.00000 | -0.00511 | 0.00000 | 0.01219 | 0.00000 |
| 185 | H18 | PZ | 0.00749 | 0.00000  | 0.00713 | 0.00000 | 0.00333 |

|              |  |          |          |          |          |          |
|--------------|--|----------|----------|----------|----------|----------|
| MO:          |  | 71       | 72       | 73       | 74       | 75       |
| Eigenvalues: |  | 0.90242  | 0.91918  | 0.94821  | 0.98293  | 0.98712  |
| (ev):        |  | 24.55622 | 25.01221 | 25.80209 | 26.74691 | 26.86081 |

|    |    | A   | A        | A        | A        | A        |          |
|----|----|-----|----------|----------|----------|----------|----------|
| 1  | H1 | S   | 0.10876  | -0.32127 | 0.00000  | 0.00000  | -0.04656 |
| 2  | H1 | S   | -0.28532 | 0.23389  | 0.00000  | 0.00000  | -0.02970 |
| 3  | H1 | PX  | 0.00962  | -0.02198 | 0.00000  | 0.00000  | -0.00526 |
| 4  | H1 | PY  | -0.00034 | 0.00576  | 0.00000  | 0.00000  | -0.01844 |
| 5  | H1 | PZ  | 0.00000  | 0.00000  | 0.00500  | -0.01694 | 0.00000  |
| 6  | C1 | S   | 0.02685  | -0.07254 | 0.00000  | 0.00000  | -0.00510 |
| 7  | C1 | S   | 0.04034  | -0.14989 | 0.00000  | 0.00000  | -0.01351 |
| 8  | C1 | PX  | 0.06391  | -0.15448 | 0.00000  | 0.00000  | -0.00016 |
| 9  | C1 | PY  | -0.09683 | 0.34820  | 0.00000  | 0.00000  | 0.04053  |
| 10 | C1 | PZ  | 0.00000  | 0.00000  | 0.26789  | 0.47586  | 0.00000  |
| 11 | C1 | S   | -0.61499 | 0.97571  | 0.00000  | 0.00000  | -0.48385 |
| 12 | C1 | PX  | 0.34426  | -0.20229 | 0.00000  | 0.00000  | 0.21290  |
| 13 | C1 | PY  | -1.27150 | 0.25796  | 0.00000  | 0.00000  | -0.59206 |
| 14 | C1 | PZ  | 0.00000  | 0.00000  | -0.35703 | -0.93196 | 0.00000  |
| 15 | C1 | DXX | 0.05916  | -0.11926 | 0.00000  | 0.00000  | -0.01577 |
| 16 | C1 | DYY | 0.00392  | -0.08383 | 0.00000  | 0.00000  | -0.02170 |
| 17 | C1 | DZZ | -0.03984 | 0.07316  | 0.00000  | 0.00000  | 0.01120  |
| 18 | C1 | DXY | 0.01299  | 0.01594  | 0.00000  | 0.00000  | -0.01380 |
| 19 | C1 | DXZ | 0.00000  | 0.00000  | 0.01649  | -0.02479 | 0.00000  |
| 20 | C1 | DYZ | 0.00000  | 0.00000  | -0.03827 | -0.01701 | 0.00000  |
| 21 | C2 | S   | -0.07530 | 0.00593  | 0.00000  | 0.00000  | 0.02445  |
| 22 | C2 | S   | -0.13280 | -0.15014 | 0.00000  | 0.00000  | 0.17521  |
| 23 | C2 | PX  | 0.12504  | -0.07795 | 0.00000  | 0.00000  | 0.00212  |
| 24 | C2 | PY  | 0.41878  | 0.09689  | 0.00000  | 0.00000  | 0.02661  |
| 25 | C2 | PZ  | 0.00000  | 0.00000  | -0.41350 | 0.13724  | 0.00000  |
| 26 | C2 | S   | 0.99729  | 0.33617  | 0.00000  | 0.00000  | -0.38110 |
| 27 | C2 | PX  | 0.17678  | 0.16989  | 0.00000  | 0.00000  | -0.43104 |
| 28 | C2 | PY  | 0.78658  | -0.98130 | 0.00000  | 0.00000  | 0.19883  |
| 29 | C2 | PZ  | 0.00000  | 0.00000  | 0.74379  | -0.22262 | 0.00000  |
| 30 | C2 | DXX | -0.11837 | 0.02052  | 0.00000  | 0.00000  | 0.04397  |
| 31 | C2 | DYY | -0.08868 | -0.02198 | 0.00000  | 0.00000  | 0.03057  |
| 32 | C2 | DZZ | 0.07305  | -0.02951 | 0.00000  | 0.00000  | -0.02539 |
| 33 | C2 | DXY | -0.02516 | -0.02191 | 0.00000  | 0.00000  | -0.04152 |
| 34 | C2 | DXZ | 0.00000  | 0.00000  | -0.01556 | 0.02452  | 0.00000  |
| 35 | C2 | DYZ | 0.00000  | 0.00000  | 0.01489  | 0.00025  | 0.00000  |
| 36 | C3 | S   | 0.01512  | -0.01762 | 0.00000  | 0.00000  | 0.00224  |
| 37 | C3 | S   | 0.28245  | -0.09035 | 0.00000  | 0.00000  | 0.16469  |
| 38 | C3 | PX  | -0.11123 | 0.01728  | 0.00000  | 0.00000  | -0.16227 |
| 39 | C3 | PY  | 0.14009  | -0.43986 | 0.00000  | 0.00000  | -0.15604 |
| 40 | C3 | PZ  | 0.00000  | 0.00000  | 0.56025  | -0.43775 | 0.00000  |
| 41 | C3 | S   | -0.19674 | 0.39895  | 0.00000  | 0.00000  | -0.00414 |
| 42 | C3 | PX  | -1.20394 | 0.43716  | 0.00000  | 0.00000  | -0.11136 |
| 43 | C3 | PY  | -0.53668 | 0.20398  | 0.00000  | 0.00000  | 0.41881  |
| 44 | C3 | PZ  | 0.00000  | 0.00000  | -0.81917 | 0.70397  | 0.00000  |
| 45 | C3 | DXX | 0.05673  | -0.00966 | 0.00000  | 0.00000  | -0.00774 |

|    |    |     |          |          |          |          |          |
|----|----|-----|----------|----------|----------|----------|----------|
| 46 | C3 | DYY | 0.06572  | -0.04906 | 0.00000  | 0.00000  | 0.02983  |
| 47 | C3 | DZZ | -0.02209 | 0.00401  | 0.00000  | 0.00000  | 0.00131  |
| 48 | C3 | DXY | -0.03233 | -0.00198 | 0.00000  | 0.00000  | -0.05777 |
| 49 | C3 | DXZ | 0.00000  | 0.00000  | -0.00520 | 0.03007  | 0.00000  |
| 50 | C3 | DYZ | 0.00000  | 0.00000  | 0.04364  | 0.04918  | 0.00000  |
| 51 | C4 | S   | -0.02588 | 0.06250  | 0.00000  | 0.00000  | 0.00060  |
| 52 | C4 | S   | 0.30672  | -0.13451 | 0.00000  | 0.00000  | -0.03888 |
| 53 | C4 | PX  | -0.20928 | -0.11462 | 0.00000  | 0.00000  | 0.08053  |
| 54 | C4 | PY  | -0.06920 | 0.27754  | 0.00000  | 0.00000  | -0.00945 |
| 55 | C4 | PZ  | 0.00000  | 0.00000  | -0.54962 | -0.25052 | 0.00000  |
| 56 | C4 | S   | 0.06395  | -0.10772 | 0.00000  | 0.00000  | 0.22574  |
| 57 | C4 | PX  | 1.53652  | -0.71437 | 0.00000  | 0.00000  | 0.51758  |
| 58 | C4 | PY  | -0.85746 | 0.34225  | 0.00000  | 0.00000  | -0.14771 |
| 59 | C4 | PZ  | 0.00000  | 0.00000  | 0.96411  | 0.57750  | 0.00000  |
| 60 | C4 | DXX | 0.01262  | 0.06173  | 0.00000  | 0.00000  | 0.00302  |
| 61 | C4 | DYY | 0.00886  | 0.05909  | 0.00000  | 0.00000  | -0.02407 |
| 62 | C4 | DZZ | 0.02673  | -0.06353 | 0.00000  | 0.00000  | 0.00289  |
| 63 | C4 | DXY | -0.01612 | -0.04124 | 0.00000  | 0.00000  | -0.03349 |
| 64 | C4 | DXZ | 0.00000  | 0.00000  | 0.01263  | -0.00172 | 0.00000  |
| 65 | C4 | DYZ | 0.00000  | 0.00000  | 0.01893  | -0.02192 | 0.00000  |
| 66 | C5 | S   | 0.06101  | -0.00271 | 0.00000  | 0.00000  | -0.02373 |
| 67 | C5 | S   | -0.20009 | 0.28110  | 0.00000  | 0.00000  | 0.06868  |
| 68 | C5 | PX  | 0.03816  | 0.26816  | 0.00000  | 0.00000  | -0.01188 |
| 69 | C5 | PY  | 0.29835  | 0.01844  | 0.00000  | 0.00000  | 0.10344  |
| 70 | C5 | PZ  | 0.00000  | 0.00000  | 0.44202  | 0.11930  | 0.00000  |
| 71 | C5 | S   | -0.16770 | -0.34542 | 0.00000  | 0.00000  | 0.35500  |
| 72 | C5 | PX  | 1.18343  | -1.06551 | 0.00000  | 0.00000  | 0.50113  |
| 73 | C5 | PY  | 0.71700  | -0.44402 | 0.00000  | 0.00000  | -0.43942 |
| 74 | C5 | PZ  | 0.00000  | 0.00000  | -0.90052 | -0.23238 | 0.00000  |
| 75 | C5 | DXX | 0.05139  | 0.02704  | 0.00000  | 0.00000  | 0.00478  |
| 76 | C5 | DYY | 0.04365  | 0.03569  | 0.00000  | 0.00000  | -0.03185 |
| 77 | C5 | DZZ | -0.06117 | 0.01035  | 0.00000  | 0.00000  | 0.01357  |
| 78 | C5 | DXY | 0.06183  | 0.01568  | 0.00000  | 0.00000  | 0.04977  |
| 79 | C5 | DXZ | 0.00000  | 0.00000  | -0.00787 | 0.00596  | 0.00000  |
| 80 | C5 | DYZ | 0.00000  | 0.00000  | 0.02149  | -0.01645 | 0.00000  |
| 81 | C6 | S   | 0.00840  | -0.00476 | 0.00000  | 0.00000  | 0.05463  |
| 82 | C6 | S   | -0.18320 | 0.07920  | 0.00000  | 0.00000  | -0.08835 |
| 83 | C6 | PX  | 0.19225  | 0.01231  | 0.00000  | 0.00000  | 0.02517  |
| 84 | C6 | PY  | -0.22361 | 0.13923  | 0.00000  | 0.00000  | 0.48162  |
| 85 | C6 | PZ  | 0.00000  | 0.00000  | 0.03324  | -0.30240 | 0.00000  |
| 86 | C6 | S   | -0.06381 | -0.64071 | 0.00000  | 0.00000  | 0.32353  |
| 87 | C6 | PX  | -1.36787 | 0.75741  | 0.00000  | 0.00000  | -0.20264 |
| 88 | C6 | PY  | 0.45952  | -0.55305 | 0.00000  | 0.00000  | -0.55792 |
| 89 | C6 | PZ  | 0.00000  | 0.00000  | -0.07166 | 0.35246  | 0.00000  |
| 90 | C6 | DXX | -0.02636 | 0.01159  | 0.00000  | 0.00000  | -0.02266 |
| 91 | C6 | DYY | -0.00654 | 0.00916  | 0.00000  | 0.00000  | 0.15849  |
| 92 | C6 | DZZ | -0.01113 | 0.00224  | 0.00000  | 0.00000  | -0.05903 |
| 93 | C6 | DXY | 0.03932  | 0.01856  | 0.00000  | 0.00000  | 0.06370  |
| 94 | C6 | DXZ | 0.00000  | 0.00000  | 0.01467  | -0.03138 | 0.00000  |
| 95 | C6 | DYZ | 0.00000  | 0.00000  | -0.02461 | 0.01161  | 0.00000  |
| 96 | C7 | S   | -0.01634 | 0.05513  | 0.00000  | 0.00000  | -0.00059 |
| 97 | C7 | S   | 0.31477  | 0.21456  | 0.00000  | 0.00000  | 0.08812  |
| 98 | C7 | PX  | -0.18936 | -0.11211 | 0.00000  | 0.00000  | -0.12482 |
| 99 | C7 | PY  | 0.08389  | -0.14982 | 0.00000  | 0.00000  | 0.10342  |



|     |    |     |          |          |          |          |          |
|-----|----|-----|----------|----------|----------|----------|----------|
| 100 | C7 | PZ  | 0.00000  | 0.00000  | -0.48330 | -0.09699 | 0.00000  |
| 101 | C7 | S   | -0.65194 | -0.42519 | 0.00000  | 0.00000  | 0.09534  |
| 102 | C7 | PX  | 0.76867  | 0.30553  | 0.00000  | 0.00000  | 0.49429  |
| 103 | C7 | PY  | 0.42592  | -0.45872 | 0.00000  | 0.00000  | -0.51400 |
| 104 | C7 | PZ  | 0.00000  | 0.00000  | 0.82834  | 0.24976  | 0.00000  |
| 105 | C7 | DXX | 0.00153  | 0.09548  | 0.00000  | 0.00000  | -0.04978 |
| 106 | C7 | DYY | 0.01528  | 0.09186  | 0.00000  | 0.00000  | 0.04103  |
| 107 | C7 | DZZ | 0.01912  | -0.06404 | 0.00000  | 0.00000  | 0.00785  |
| 108 | C7 | DXY | 0.02422  | -0.02579 | 0.00000  | 0.00000  | -0.01177 |
| 109 | C7 | DXZ | 0.00000  | 0.00000  | 0.01569  | -0.00171 | 0.00000  |
| 110 | C7 | DYZ | 0.00000  | 0.00000  | 0.00983  | -0.03151 | 0.00000  |
| 111 | H3 | S   | -0.09476 | 0.19325  | 0.00000  | 0.00000  | -0.05742 |
| 112 | H3 | S   | 0.22203  | -0.07424 | 0.00000  | 0.00000  | 0.00563  |
| 113 | H3 | PX  | 0.00867  | -0.00491 | 0.00000  | 0.00000  | 0.00521  |
| 114 | H3 | PY  | -0.00722 | 0.01400  | 0.00000  | 0.00000  | -0.01027 |
| 115 | H3 | PZ  | 0.00000  | 0.00000  | 0.01013  | 0.00047  | 0.00000  |
| 116 | H4 | S   | 0.13370  | -0.00784 | 0.00000  | 0.00000  | -0.18100 |
| 117 | H4 | S   | -0.02701 | 0.09486  | 0.00000  | 0.00000  | 0.50607  |
| 118 | H4 | PX  | 0.01020  | -0.00592 | 0.00000  | 0.00000  | 0.01753  |
| 119 | H4 | PY  | 0.00835  | 0.00330  | 0.00000  | 0.00000  | -0.02376 |
| 120 | H4 | PZ  | 0.00000  | 0.00000  | 0.00089  | -0.00639 | 0.00000  |
| 121 | N1 | S   | -0.00097 | -0.00443 | 0.00000  | 0.00000  | -0.02681 |
| 122 | N1 | S   | -0.04128 | 0.01058  | 0.00000  | 0.00000  | 0.04286  |
| 123 | N1 | PX  | 0.22851  | 0.08362  | 0.00000  | 0.00000  | 0.66019  |
| 124 | N1 | PY  | 0.01241  | 0.04346  | 0.00000  | 0.00000  | 0.21896  |
| 125 | N1 | PZ  | 0.00000  | 0.00000  | -0.05079 | 0.12473  | 0.00000  |
| 126 | N1 | S   | 0.34193  | 0.10500  | 0.00000  | 0.00000  | -1.12902 |
| 127 | N1 | PX  | 0.21058  | -0.11400 | 0.00000  | 0.00000  | -0.91734 |
| 128 | N1 | PY  | -0.42210 | 0.26459  | 0.00000  | 0.00000  | 0.10142  |
| 129 | N1 | PZ  | 0.00000  | 0.00000  | 0.09342  | 0.03610  | 0.00000  |
| 130 | N1 | DXX | -0.01695 | 0.01643  | 0.00000  | 0.00000  | -0.09168 |
| 131 | N1 | DYY | -0.00195 | -0.00648 | 0.00000  | 0.00000  | -0.18552 |
| 132 | N1 | DZZ | -0.02445 | -0.02003 | 0.00000  | 0.00000  | 0.05889  |
| 133 | N1 | DXY | -0.01086 | -0.01825 | 0.00000  | 0.00000  | 0.00280  |
| 134 | N1 | DXZ | 0.00000  | 0.00000  | -0.01540 | 0.03098  | 0.00000  |
| 135 | N1 | DYZ | 0.00000  | 0.00000  | 0.01779  | -0.03103 | 0.00000  |
| 136 | H6 | S   | -0.35328 | 0.03459  | 0.00000  | 0.00000  | 0.02741  |
| 137 | H6 | S   | 0.20375  | -0.12044 | 0.00000  | 0.00000  | -0.27696 |
| 138 | H6 | PX  | 0.02639  | -0.00343 | 0.00000  | 0.00000  | -0.00210 |
| 139 | H6 | PY  | 0.00272  | 0.00770  | 0.00000  | 0.00000  | 0.00221  |
| 140 | H6 | PZ  | 0.00000  | 0.00000  | 0.00707  | -0.00849 | 0.00000  |
| 141 | C8 | S   | 0.01811  | 0.02930  | 0.00000  | 0.00000  | 0.00747  |
| 142 | C8 | S   | -0.14889 | 0.12998  | 0.00000  | 0.00000  | -0.25959 |
| 143 | C8 | PX  | -0.01884 | 0.11789  | 0.00000  | 0.00000  | 0.26527  |
| 144 | C8 | PY  | 0.14152  | 0.39160  | 0.00000  | 0.00000  | -0.39673 |
| 145 | C8 | PZ  | 0.00000  | 0.00000  | 0.01280  | 0.75053  | 0.00000  |
| 146 | C8 | S   | 0.29980  | -0.28144 | 0.00000  | 0.00000  | 1.07337  |
| 147 | C8 | PX  | 0.87934  | -0.31771 | 0.00000  | 0.00000  | -0.86084 |
| 148 | C8 | PY  | -0.10697 | -0.37678 | 0.00000  | 0.00000  | 1.10883  |
| 149 | C8 | PZ  | 0.00000  | 0.00000  | -0.14284 | -1.30499 | 0.00000  |
| 150 | C8 | DXX | 0.03114  | 0.02333  | 0.00000  | 0.00000  | 0.03093  |
| 151 | C8 | DYY | 0.00887  | 0.08287  | 0.00000  | 0.00000  | -0.00947 |
| 152 | C8 | DZZ | -0.02792 | -0.02111 | 0.00000  | 0.00000  | -0.02704 |
| 153 | C8 | DXY | 0.00873  | 0.00676  | 0.00000  | 0.00000  | -0.09493 |

|     |     |     |          |          |          |          |          |
|-----|-----|-----|----------|----------|----------|----------|----------|
| 154 | C8  | DXZ | 0.00000  | 0.00000  | -0.00081 | -0.00825 | 0.00000  |
| 155 | C8  | DYZ | 0.00000  | 0.00000  | -0.04355 | 0.04624  | 0.00000  |
| 156 | H8  | S   | -0.13030 | 0.19321  | 0.00000  | 0.00000  | -0.03565 |
| 157 | H8  | S   | -0.07093 | -0.37859 | 0.00000  | 0.00000  | -0.28333 |
| 158 | H8  | PX  | 0.00216  | 0.02285  | 0.00000  | 0.00000  | 0.00664  |
| 159 | H8  | PY  | 0.00321  | -0.02446 | 0.00000  | 0.00000  | -0.01140 |
| 160 | H8  | PZ  | 0.00000  | 0.00000  | 0.00994  | 0.00877  | 0.00000  |
| 161 | C10 | S   | -0.03410 | -0.04966 | 0.00000  | 0.00000  | 0.02875  |
| 162 | C10 | S   | -0.32541 | -0.23891 | 0.00000  | 0.00000  | 0.19323  |
| 163 | C10 | PX  | 0.09463  | 0.03345  | 0.00000  | 0.00000  | -0.01351 |
| 164 | C10 | PY  | 0.01622  | 0.18530  | 0.00000  | 0.00000  | -0.11536 |
| 165 | C10 | PZ  | 0.00000  | 0.00000  | 0.14498  | -0.28426 | 0.00000  |
| 166 | C10 | S   | 0.74055  | 0.66318  | 0.00000  | 0.00000  | -0.13044 |
| 167 | C10 | PX  | -0.51956 | -0.05211 | 0.00000  | 0.00000  | 0.13273  |
| 168 | C10 | PY  | -0.04689 | -0.20170 | 0.00000  | 0.00000  | 0.08102  |
| 169 | C10 | PZ  | 0.00000  | 0.00000  | -0.16222 | 0.68871  | 0.00000  |
| 170 | C10 | DXX | -0.07177 | -0.06723 | 0.00000  | 0.00000  | 0.02556  |
| 171 | C10 | DYY | -0.07487 | -0.11138 | 0.00000  | 0.00000  | 0.07436  |
| 172 | C10 | DZZ | 0.02591  | 0.04635  | 0.00000  | 0.00000  | -0.02854 |
| 173 | C10 | DXY | -0.00591 | -0.01468 | 0.00000  | 0.00000  | 0.00824  |
| 174 | C10 | DXZ | 0.00000  | 0.00000  | 0.01515  | 0.00298  | 0.00000  |
| 175 | C10 | DYZ | 0.00000  | 0.00000  | 0.01647  | 0.00050  | 0.00000  |
| 176 | H16 | S   | -0.18744 | -0.18747 | 0.00000  | 0.00000  | 0.13453  |
| 177 | H16 | S   | 0.13517  | -0.08214 | 0.00000  | 0.00000  | 0.01928  |
| 178 | H16 | PX  | -0.01526 | -0.00799 | 0.00000  | 0.00000  | -0.00931 |
| 179 | H16 | PY  | 0.01347  | 0.00554  | 0.00000  | 0.00000  | -0.02469 |
| 180 | H16 | PZ  | 0.00000  | 0.00000  | 0.00164  | 0.00890  | 0.00000  |
| 181 | H18 | S   | -0.22753 | -0.28233 | 0.00000  | 0.00000  | 0.05411  |
| 182 | H18 | S   | -0.30220 | -0.08322 | 0.00000  | 0.00000  | 0.02499  |
| 183 | H18 | PX  | 0.00450  | 0.00525  | 0.00000  | 0.00000  | 0.00110  |
| 184 | H18 | PY  | 0.00309  | 0.01662  | 0.00000  | 0.00000  | 0.00837  |
| 185 | H18 | PZ  | 0.00000  | 0.00000  | -0.00564 | 0.00552  | 0.00000  |

|              |          |          |          |          |          |
|--------------|----------|----------|----------|----------|----------|
| MO:          | 76       | 77       | 78       | 79       | 80       |
| Eigenvalues: | 1.04060  | 1.04963  | 1.05374  | 1.07556  | 1.08597  |
| (ev):        | 28.31629 | 28.56182 | 28.67377 | 29.26760 | 29.55087 |

|    |    | A   | A        | A        | A        | A        |          |
|----|----|-----|----------|----------|----------|----------|----------|
| 1  | H1 | S   | 0.00000  | -0.00292 | 0.15600  | -0.30413 | 0.13931  |
| 2  | H1 | S   | 0.00000  | -0.41857 | -0.87875 | 1.12984  | -1.35907 |
| 3  | H1 | PX  | 0.00000  | 0.01999  | 0.05019  | -0.07865 | 0.07335  |
| 4  | H1 | PY  | 0.00000  | 0.00757  | 0.01953  | -0.01905 | 0.00279  |
| 5  | H1 | PZ  | -0.02346 | 0.00000  | 0.00000  | 0.00000  | 0.00000  |
| 6  | C1 | S   | 0.00000  | 0.00543  | 0.01659  | -0.01993 | 0.01890  |
| 7  | C1 | S   | 0.00000  | 0.04194  | -0.15595 | 0.25187  | -0.12598 |
| 8  | C1 | PX  | 0.00000  | -0.17775 | -0.27197 | 0.41358  | -0.49004 |
| 9  | C1 | PY  | 0.00000  | 0.00103  | 0.07902  | 0.03971  | -0.03986 |
| 10 | C1 | PZ  | 0.22148  | 0.00000  | 0.00000  | 0.00000  | 0.00000  |
| 11 | C1 | S   | 0.00000  | -0.05828 | 0.39462  | -0.59413 | -0.13261 |
| 12 | C1 | PX  | 0.00000  | 0.64702  | 1.03340  | -1.02902 | 2.12878  |
| 13 | C1 | PY  | 0.00000  | 0.16296  | 0.00997  | -0.05122 | 0.29149  |
| 14 | C1 | PZ  | -0.86851 | 0.00000  | 0.00000  | 0.00000  | 0.00000  |
| 15 | C1 | DXX | 0.00000  | 0.02417  | 0.05959  | -0.13673 | 0.02891  |
| 16 | C1 | DYY | 0.00000  | -0.00668 | -0.03426 | 0.08672  | -0.02578 |

|    |    |     |          |          |          |          |          |
|----|----|-----|----------|----------|----------|----------|----------|
| 17 | C1 | DZZ | 0.00000  | -0.00968 | -0.04410 | 0.05072  | -0.02431 |
| 18 | C1 | DXY | 0.00000  | -0.01236 | 0.05243  | 0.03485  | 0.02720  |
| 19 | C1 | DXZ | -0.01280 | 0.00000  | 0.00000  | 0.00000  | 0.00000  |
| 20 | C1 | DYZ | -0.00761 | 0.00000  | 0.00000  | 0.00000  | 0.00000  |
| 21 | C2 | S   | 0.00000  | 0.00363  | -0.00079 | 0.01019  | 0.02132  |
| 22 | C2 | S   | 0.00000  | -0.21087 | 0.13334  | -0.18399 | -0.27640 |
| 23 | C2 | PX  | 0.00000  | 0.08826  | -0.09186 | 0.14129  | 0.42885  |
| 24 | C2 | PY  | 0.00000  | 0.01332  | -0.08303 | 0.05888  | 0.10374  |
| 25 | C2 | PZ  | -0.36201 | 0.00000  | 0.00000  | 0.00000  | 0.00000  |
| 26 | C2 | S   | 0.00000  | -0.32410 | 0.00976  | 0.59425  | -0.02360 |
| 27 | C2 | PX  | 0.00000  | -0.55732 | 0.48233  | -0.10193 | -1.61724 |
| 28 | C2 | PY  | 0.00000  | -0.05588 | -0.05342 | -0.26611 | -0.62472 |
| 29 | C2 | PZ  | 1.06059  | 0.00000  | 0.00000  | 0.00000  | 0.00000  |
| 30 | C2 | DXX | 0.00000  | -0.01994 | -0.00147 | 0.07489  | 0.09449  |
| 31 | C2 | DYY | 0.00000  | -0.02400 | 0.01734  | -0.04759 | -0.08746 |
| 32 | C2 | DZZ | 0.00000  | 0.00891  | 0.00637  | -0.02981 | -0.04093 |
| 33 | C2 | DXY | 0.00000  | 0.00884  | 0.00754  | 0.04927  | -0.00718 |
| 34 | C2 | DXZ | -0.01199 | 0.00000  | 0.00000  | 0.00000  | 0.00000  |
| 35 | C2 | DYZ | 0.02713  | 0.00000  | 0.00000  | 0.00000  | 0.00000  |
| 36 | C3 | S   | 0.00000  | 0.00338  | 0.01577  | 0.01986  | 0.00218  |
| 37 | C3 | S   | 0.00000  | 0.11493  | 0.15901  | 0.17243  | -0.09792 |
| 38 | C3 | PX  | 0.00000  | 0.02665  | 0.06770  | -0.14665 | 0.18548  |
| 39 | C3 | PY  | 0.00000  | -0.12569 | 0.12425  | 0.19534  | -0.03448 |
| 40 | C3 | PZ  | -0.67347 | 0.00000  | 0.00000  | 0.00000  | 0.00000  |
| 41 | C3 | S   | 0.00000  | 0.08420  | 1.05724  | -0.48209 | 1.01177  |
| 42 | C3 | PX  | 0.00000  | -0.38081 | -0.46521 | 0.96597  | -0.57250 |
| 43 | C3 | PY  | 0.00000  | 0.71516  | -0.58062 | -1.16437 | 0.26419  |
| 44 | C3 | PZ  | 1.66304  | 0.00000  | 0.00000  | 0.00000  | 0.00000  |
| 45 | C3 | DXX | 0.00000  | 0.01881  | -0.01210 | -0.00823 | -0.03483 |
| 46 | C3 | DYY | 0.00000  | 0.00919  | 0.11848  | 0.03341  | 0.05837  |
| 47 | C3 | DZZ | 0.00000  | 0.00272  | -0.03184 | 0.00029  | -0.01050 |
| 48 | C3 | DXY | 0.00000  | 0.03562  | -0.00803 | -0.01703 | 0.03391  |
| 49 | C3 | DXZ | -0.00579 | 0.00000  | 0.00000  | 0.00000  | 0.00000  |
| 50 | C3 | DYZ | 0.00238  | 0.00000  | 0.00000  | 0.00000  | 0.00000  |
| 51 | C4 | S   | 0.00000  | 0.00659  | -0.00381 | -0.03161 | -0.01620 |
| 52 | C4 | S   | 0.00000  | 0.08223  | -0.05131 | 0.24131  | 0.13485  |
| 53 | C4 | PX  | 0.00000  | -0.11422 | -0.00500 | 0.24575  | 0.21497  |
| 54 | C4 | PY  | 0.00000  | -0.08485 | 0.15762  | 0.47874  | 0.33304  |
| 55 | C4 | PZ  | -0.20681 | 0.00000  | 0.00000  | 0.00000  | 0.00000  |
| 56 | C4 | S   | 0.00000  | -0.18554 | 0.45395  | 0.00572  | 0.51882  |
| 57 | C4 | PX  | 0.00000  | 0.20723  | -0.38304 | -1.16762 | -1.11907 |
| 58 | C4 | PY  | 0.00000  | 0.36863  | -0.59825 | -1.58387 | -1.35344 |
| 59 | C4 | PZ  | 0.67088  | 0.00000  | 0.00000  | 0.00000  | 0.00000  |
| 60 | C4 | DXX | 0.00000  | -0.01775 | -0.00803 | 0.08179  | 0.00269  |
| 61 | C4 | DYY | 0.00000  | 0.03849  | 0.01386  | -0.12242 | -0.00868 |
| 62 | C4 | DZZ | 0.00000  | -0.00358 | -0.00701 | 0.05256  | 0.01997  |
| 63 | C4 | DXY | 0.00000  | -0.00626 | -0.02245 | -0.07318 | -0.08021 |
| 64 | C4 | DXZ | -0.00732 | 0.00000  | 0.00000  | 0.00000  | 0.00000  |
| 65 | C4 | DYZ | -0.01247 | 0.00000  | 0.00000  | 0.00000  | 0.00000  |
| 66 | C5 | S   | 0.00000  | -0.00609 | -0.00493 | 0.03089  | -0.00226 |
| 67 | C5 | S   | 0.00000  | 0.02494  | -0.00585 | -0.12044 | -0.04054 |
| 68 | C5 | PX  | 0.00000  | -0.15534 | -0.06666 | 0.28921  | 0.00443  |
| 69 | C5 | PY  | 0.00000  | 0.03821  | 0.03329  | -0.43447 | 0.03574  |
| 70 | C5 | PZ  | 0.28920  | 0.00000  | 0.00000  | 0.00000  | 0.00000  |

|     |    |     |          |          |          |          |          |
|-----|----|-----|----------|----------|----------|----------|----------|
| 71  | C5 | S   | 0.00000  | 0.35622  | -0.40394 | -0.26468 | 0.24348  |
| 72  | C5 | PX  | 0.00000  | 0.36488  | -0.16407 | -1.44039 | -0.52317 |
| 73  | C5 | PY  | 0.00000  | -0.51410 | 0.00240  | 1.56288  | -0.41099 |
| 74  | C5 | PZ  | -0.81008 | 0.00000  | 0.00000  | 0.00000  | 0.00000  |
| 75  | C5 | DXX | 0.00000  | 0.01898  | -0.01374 | -0.03520 | -0.04995 |
| 76  | C5 | DYY | 0.00000  | -0.01167 | -0.02147 | 0.07843  | 0.04517  |
| 77  | C5 | DZZ | 0.00000  | 0.00641  | 0.00797  | -0.04114 | -0.00109 |
| 78  | C5 | DXY | 0.00000  | 0.01851  | 0.01052  | -0.06472 | 0.04273  |
| 79  | C5 | DXZ | 0.00040  | 0.00000  | 0.00000  | 0.00000  | 0.00000  |
| 80  | C5 | DYZ | -0.00108 | 0.00000  | 0.00000  | 0.00000  | 0.00000  |
| 81  | C6 | S   | 0.00000  | -0.00158 | -0.01207 | -0.01499 | -0.00987 |
| 82  | C6 | S   | 0.00000  | -0.46520 | 0.19854  | -0.29100 | 0.01396  |
| 83  | C6 | PX  | 0.00000  | 0.21487  | -0.13046 | -0.04744 | -0.02449 |
| 84  | C6 | PY  | 0.00000  | 0.26060  | -0.24335 | -0.04298 | -0.04573 |
| 85  | C6 | PZ  | 0.60710  | 0.00000  | 0.00000  | 0.00000  | 0.00000  |
| 86  | C6 | S   | 0.00000  | -0.37785 | -0.04720 | 0.78329  | -0.53699 |
| 87  | C6 | PX  | 0.00000  | -0.50055 | 0.17336  | 0.70101  | 0.30592  |
| 88  | C6 | PY  | 0.00000  | 0.53555  | -0.43840 | 0.56820  | 0.77449  |
| 89  | C6 | PZ  | -1.50926 | 0.00000  | 0.00000  | 0.00000  | 0.00000  |
| 90  | C6 | DXX | 0.00000  | -0.04827 | 0.00183  | -0.00045 | -0.05102 |
| 91  | C6 | DYY | 0.00000  | -0.09797 | 0.02840  | -0.03807 | 0.02269  |
| 92  | C6 | DZZ | 0.00000  | 0.01257  | 0.00551  | -0.00600 | 0.01207  |
| 93  | C6 | DXY | 0.00000  | 0.02404  | -0.01848 | 0.03192  | -0.00866 |
| 94  | C6 | DXZ | 0.00988  | 0.00000  | 0.00000  | 0.00000  | 0.00000  |
| 95  | C6 | DYZ | -0.04068 | 0.00000  | 0.00000  | 0.00000  | 0.00000  |
| 96  | C7 | S   | 0.00000  | 0.01705  | 0.03073  | -0.00116 | 0.00434  |
| 97  | C7 | S   | 0.00000  | -0.04724 | -0.17405 | 0.23066  | -0.22457 |
| 98  | C7 | PX  | 0.00000  | -0.26351 | -0.69643 | -0.05664 | -0.21872 |
| 99  | C7 | PY  | 0.00000  | -0.13748 | 0.23162  | 0.15994  | 0.02934  |
| 100 | C7 | PZ  | 0.17540  | 0.00000  | 0.00000  | 0.00000  | 0.00000  |
| 101 | C7 | S   | 0.00000  | 1.01338  | -0.27457 | -0.87469 | -0.33183 |
| 102 | C7 | PX  | 0.00000  | 0.37399  | 2.99524  | 0.17570  | 1.12445  |
| 103 | C7 | PY  | 0.00000  | 0.31218  | -1.07381 | -0.82528 | -0.01212 |
| 104 | C7 | PZ  | -0.76773 | 0.00000  | 0.00000  | 0.00000  | 0.00000  |
| 105 | C7 | DXX | 0.00000  | 0.02933  | 0.06232  | 0.03632  | -0.00665 |
| 106 | C7 | DYY | 0.00000  | 0.03443  | -0.04882 | -0.02131 | -0.04802 |
| 107 | C7 | DZZ | 0.00000  | -0.02477 | -0.05588 | 0.01289  | -0.00492 |
| 108 | C7 | DXY | 0.00000  | -0.02746 | -0.01497 | 0.01574  | -0.06104 |
| 109 | C7 | DXZ | 0.01379  | 0.00000  | 0.00000  | 0.00000  | 0.00000  |
| 110 | C7 | DYZ | -0.01014 | 0.00000  | 0.00000  | 0.00000  | 0.00000  |
| 111 | H3 | S   | 0.00000  | -0.00050 | -0.02529 | -0.34993 | -0.21613 |
| 112 | H3 | S   | 0.00000  | -0.25523 | 0.35238  | 1.60489  | 1.15311  |
| 113 | H3 | PX  | 0.00000  | 0.00155  | -0.00906 | -0.05828 | -0.02771 |
| 114 | H3 | PY  | 0.00000  | 0.01406  | -0.01411 | -0.08045 | -0.06042 |
| 115 | H3 | PZ  | 0.00835  | 0.00000  | 0.00000  | 0.00000  | 0.00000  |
| 116 | H4 | S   | 0.00000  | -0.06388 | -0.01063 | 0.28597  | -0.03449 |
| 117 | H4 | S   | 0.00000  | 0.37141  | 0.06907  | -1.50467 | 0.04550  |
| 118 | H4 | PX  | 0.00000  | 0.00248  | 0.00109  | -0.05996 | -0.00658 |
| 119 | H4 | PY  | 0.00000  | -0.02094 | -0.01023 | 0.06721  | -0.01084 |
| 120 | H4 | PZ  | -0.01437 | 0.00000  | 0.00000  | 0.00000  | 0.00000  |
| 121 | N1 | S   | 0.00000  | -0.05899 | 0.02618  | -0.00756 | 0.00128  |
| 122 | N1 | S   | 0.00000  | 0.19496  | -0.03495 | -0.01027 | -0.09316 |
| 123 | N1 | PX  | 0.00000  | -0.33052 | 0.04979  | 0.01787  | -0.02739 |
| 124 | N1 | PY  | 0.00000  | -0.09679 | -0.01945 | -0.07736 | 0.01329  |

|     |     |     |          |          |          |          |          |
|-----|-----|-----|----------|----------|----------|----------|----------|
| 125 | N1  | PZ  | 0.15618  | 0.00000  | 0.00000  | 0.00000  | 0.00000  |
| 126 | N1  | S   | 0.00000  | 0.04733  | -1.15100 | -0.09080 | 0.96336  |
| 127 | N1  | PX  | 0.00000  | 1.10857  | -0.65455 | -0.06290 | 0.07650  |
| 128 | N1  | PY  | 0.00000  | 0.86752  | -0.31978 | 0.35801  | 0.06942  |
| 129 | N1  | PZ  | -0.02934 | 0.00000  | 0.00000  | 0.00000  | 0.00000  |
| 130 | N1  | DXX | 0.00000  | -0.06451 | -0.01592 | -0.04778 | -0.01471 |
| 131 | N1  | DYY | 0.00000  | 0.01589  | 0.01844  | -0.00534 | 0.03521  |
| 132 | N1  | DZZ | 0.00000  | 0.14205  | -0.02863 | 0.03045  | -0.03703 |
| 133 | N1  | DXY | 0.00000  | 0.00885  | 0.03511  | 0.01310  | -0.01560 |
| 134 | N1  | DXZ | 0.02978  | 0.00000  | 0.00000  | 0.00000  | 0.00000  |
| 135 | N1  | DYZ | 0.02788  | 0.00000  | 0.00000  | 0.00000  | 0.00000  |
| 136 | H6  | S   | 0.00000  | -0.01992 | 0.04772  | 0.13148  | 0.25655  |
| 137 | H6  | S   | 0.00000  | -0.26884 | 0.29450  | -0.39754 | -1.33941 |
| 138 | H6  | PX  | 0.00000  | -0.01315 | 0.01173  | -0.03384 | -0.07898 |
| 139 | H6  | PY  | 0.00000  | -0.02703 | 0.00139  | 0.00221  | -0.00365 |
| 140 | H6  | PZ  | 0.02368  | 0.00000  | 0.00000  | 0.00000  | 0.00000  |
| 141 | C8  | S   | 0.00000  | -0.01605 | 0.00991  | 0.00287  | -0.00979 |
| 142 | C8  | S   | 0.00000  | -0.62849 | 0.18592  | -0.09794 | -0.08721 |
| 143 | C8  | PX  | 0.00000  | 0.36073  | -0.01674 | 0.16841  | -0.21767 |
| 144 | C8  | PY  | 0.00000  | -0.22155 | -0.06427 | -0.08656 | -0.11087 |
| 145 | C8  | PZ  | -0.33331 | 0.00000  | 0.00000  | 0.00000  | 0.00000  |
| 146 | C8  | S   | 0.00000  | 1.03465  | 0.70384  | 0.29666  | 0.34647  |
| 147 | C8  | PX  | 0.00000  | -1.01452 | -0.44399 | -0.83294 | 1.32921  |
| 148 | C8  | PY  | 0.00000  | -0.23962 | 1.79620  | 0.25406  | 0.77057  |
| 149 | C8  | PZ  | 0.73537  | 0.00000  | 0.00000  | 0.00000  | 0.00000  |
| 150 | C8  | DXX | 0.00000  | -0.01407 | 0.05448  | 0.00692  | -0.01785 |
| 151 | C8  | DYY | 0.00000  | -0.13345 | 0.06652  | -0.01231 | -0.00584 |
| 152 | C8  | DZZ | 0.00000  | 0.00677  | -0.03101 | -0.00619 | 0.00314  |
| 153 | C8  | DXY | 0.00000  | 0.04833  | 0.07996  | 0.00806  | -0.02037 |
| 154 | C8  | DXZ | -0.01745 | 0.00000  | 0.00000  | 0.00000  | 0.00000  |
| 155 | C8  | DYZ | 0.00666  | 0.00000  | 0.00000  | 0.00000  | 0.00000  |
| 156 | H8  | S   | 0.00000  | 0.14922  | 0.10201  | 0.01647  | 0.12393  |
| 157 | H8  | S   | 0.00000  | -0.38804 | -2.04629 | -0.15472 | -0.73552 |
| 158 | H8  | PX  | 0.00000  | 0.03901  | 0.09678  | 0.00880  | 0.03029  |
| 159 | H8  | PY  | 0.00000  | -0.00882 | -0.02662 | 0.01268  | -0.02855 |
| 160 | H8  | PZ  | -0.01768 | 0.00000  | 0.00000  | 0.00000  | 0.00000  |
| 161 | C10 | S   | 0.00000  | 0.01261  | 0.00604  | 0.00592  | 0.00442  |
| 162 | C10 | S   | 0.00000  | -0.33528 | -0.02067 | -0.00126 | -0.09432 |
| 163 | C10 | PX  | 0.00000  | -0.14997 | -0.56117 | -0.17838 | 0.61225  |
| 164 | C10 | PY  | 0.00000  | -0.04869 | 0.09502  | 0.01281  | -0.07303 |
| 165 | C10 | PZ  | 0.01851  | 0.00000  | 0.00000  | 0.00000  | 0.00000  |
| 166 | C10 | S   | 0.00000  | -0.10202 | 1.16414  | 0.02233  | 0.62218  |
| 167 | C10 | PX  | 0.00000  | 0.64467  | 1.67132  | 0.70579  | -1.92821 |
| 168 | C10 | PY  | 0.00000  | -0.02942 | 0.10134  | -0.08733 | 0.37926  |
| 169 | C10 | PZ  | -0.21116 | 0.00000  | 0.00000  | 0.00000  | 0.00000  |
| 170 | C10 | DXX | 0.00000  | 0.00524  | 0.00146  | 0.00558  | 0.00590  |
| 171 | C10 | DYY | 0.00000  | -0.01758 | 0.02641  | 0.00979  | 0.00635  |
| 172 | C10 | DZZ | 0.00000  | -0.01209 | -0.03074 | -0.00737 | -0.01408 |
| 173 | C10 | DXY | 0.00000  | -0.04492 | -0.07147 | -0.01219 | 0.09604  |
| 174 | C10 | DXZ | -0.01628 | 0.00000  | 0.00000  | 0.00000  | 0.00000  |
| 175 | C10 | DYZ | -0.00334 | 0.00000  | 0.00000  | 0.00000  | 0.00000  |
| 176 | H16 | S   | 0.00000  | 0.26803  | 0.08931  | 0.05859  | -0.15123 |
| 177 | H16 | S   | 0.00000  | -0.49691 | -1.08310 | -0.41878 | 1.15281  |
| 178 | H16 | PX  | 0.00000  | 0.02865  | 0.05419  | 0.01728  | -0.05284 |

|     |     |    |          |          |          |          |          |
|-----|-----|----|----------|----------|----------|----------|----------|
| 179 | H16 | PY | 0.00000  | -0.02415 | -0.04465 | -0.01403 | 0.04434  |
| 180 | H16 | PZ | -0.00891 | 0.00000  | 0.00000  | 0.00000  | 0.00000  |
| 181 | H18 | S  | 0.00000  | 0.00147  | -0.07430 | -0.00213 | 0.17075  |
| 182 | H18 | S  | 0.00000  | 0.37281  | 0.85007  | 0.34030  | -1.16968 |
| 183 | H18 | PX | 0.00000  | -0.00871 | 0.05060  | 0.01294  | -0.06077 |
| 184 | H18 | PY | 0.00000  | 0.02763  | 0.01497  | 0.01047  | -0.05048 |
| 185 | H18 | PZ | 0.00048  | 0.00000  | 0.00000  | 0.00000  | 0.00000  |

|              |          |          |          |          |          |
|--------------|----------|----------|----------|----------|----------|
| MO:          | 81       | 82       | 83       | 84       | 85       |
| Eigenvalues: | 1.10437  | 1.12072  | 1.12717  | 1.13890  | 1.16081  |
| (ev):        | 30.05141 | 30.49639 | 30.67181 | 30.99115 | 31.58731 |

|    |    | A   | A        | A        | A        | A        |          |
|----|----|-----|----------|----------|----------|----------|----------|
| 1  | H1 | S   | 0.17054  | -0.06642 | 0.00000  | -0.26320 | 0.05922  |
| 2  | H1 | S   | -0.74859 | -0.20358 | 0.00000  | 1.56623  | -0.39589 |
| 3  | H1 | PX  | 0.04873  | 0.01274  | 0.00000  | -0.10272 | 0.00736  |
| 4  | H1 | PY  | -0.01804 | -0.02592 | 0.00000  | 0.00110  | 0.01658  |
| 5  | H1 | PZ  | 0.00000  | 0.00000  | 0.00361  | 0.00000  | 0.00000  |
| 6  | C1 | S   | 0.01103  | -0.00156 | 0.00000  | 0.00048  | 0.00237  |
| 7  | C1 | S   | -0.22353 | -0.24102 | 0.00000  | 0.76989  | 0.09874  |
| 8  | C1 | PX  | -0.24835 | -0.04153 | 0.00000  | 0.52089  | -0.07924 |
| 9  | C1 | PY  | -0.02225 | 0.06288  | 0.00000  | 0.03885  | -0.00664 |
| 10 | C1 | PZ  | 0.00000  | 0.00000  | -0.05861 | 0.00000  | 0.00000  |
| 11 | C1 | S   | -0.27150 | 0.54082  | 0.00000  | -1.66412 | -0.59511 |
| 12 | C1 | PX  | 0.95466  | 0.35591  | 0.00000  | -1.66545 | 0.64059  |
| 13 | C1 | PY  | -0.09910 | -0.26463 | 0.00000  | 0.22595  | 0.29425  |
| 14 | C1 | PZ  | 0.00000  | 0.00000  | 0.23216  | 0.00000  | 0.00000  |
| 15 | C1 | DXX | 0.04140  | -0.04731 | 0.00000  | -0.03676 | 0.02138  |
| 16 | C1 | DYY | -0.06643 | -0.01103 | 0.00000  | 0.08879  | -0.00015 |
| 17 | C1 | DZZ | -0.00940 | 0.00429  | 0.00000  | 0.05198  | -0.01072 |
| 18 | C1 | DXY | -0.00658 | 0.01855  | 0.00000  | -0.02110 | 0.03078  |
| 19 | C1 | DXZ | 0.00000  | 0.00000  | -0.01507 | 0.00000  | 0.00000  |
| 20 | C1 | DYZ | 0.00000  | 0.00000  | 0.01475  | 0.00000  | 0.00000  |
| 21 | C2 | S   | 0.01744  | -0.00974 | 0.00000  | -0.00053 | 0.01863  |
| 22 | C2 | S   | -0.19955 | 0.37680  | 0.00000  | -0.50007 | 0.28768  |
| 23 | C2 | PX  | 0.61669  | -0.41299 | 0.00000  | 0.29509  | -0.11117 |
| 24 | C2 | PY  | 0.03052  | -0.09357 | 0.00000  | -0.08586 | -0.35667 |
| 25 | C2 | PZ  | 0.00000  | 0.00000  | -0.07457 | 0.00000  | 0.00000  |
| 26 | C2 | S   | -0.24573 | -0.80353 | 0.00000  | 1.44286  | -0.40700 |
| 27 | C2 | PX  | -2.62724 | 1.28102  | 0.00000  | -1.01842 | 0.54528  |
| 28 | C2 | PY  | 0.26037  | 0.30025  | 0.00000  | -0.36456 | 2.15583  |
| 29 | C2 | PZ  | 0.00000  | 0.00000  | -0.11507 | 0.00000  | 0.00000  |
| 30 | C2 | DXX | 0.04660  | -0.09229 | 0.00000  | -0.00239 | 0.04515  |
| 31 | C2 | DYY | -0.05839 | 0.07137  | 0.00000  | -0.03967 | 0.02490  |
| 32 | C2 | DZZ | -0.02718 | 0.05375  | 0.00000  | -0.03092 | -0.00417 |
| 33 | C2 | DXY | 0.00263  | 0.01523  | 0.00000  | -0.02829 | 0.05090  |
| 34 | C2 | DXZ | 0.00000  | 0.00000  | 0.02125  | 0.00000  | 0.00000  |
| 35 | C2 | DYZ | 0.00000  | 0.00000  | 0.02027  | 0.00000  | 0.00000  |
| 36 | C3 | S   | -0.01159 | 0.01287  | 0.00000  | -0.00169 | 0.00883  |
| 37 | C3 | S   | -0.13696 | -0.24890 | 0.00000  | 0.12116  | 0.49063  |
| 38 | C3 | PX  | -0.09697 | -0.04589 | 0.00000  | -0.08666 | 0.05638  |
| 39 | C3 | PY  | -0.05431 | 0.19556  | 0.00000  | -0.08325 | -0.21550 |
| 40 | C3 | PZ  | 0.00000  | 0.00000  | 0.17743  | 0.00000  | 0.00000  |
| 41 | C3 | S   | -0.85795 | 1.38983  | 0.00000  | -1.16502 | -0.68981 |

|    |    |     |          |          |          |          |          |
|----|----|-----|----------|----------|----------|----------|----------|
| 42 | C3 | PX  | 0.60926  | 0.09813  | 0.00000  | 0.84679  | -0.57817 |
| 43 | C3 | PY  | 0.80799  | -1.12068 | 0.00000  | 0.64242  | 1.16653  |
| 44 | C3 | PZ  | 0.00000  | 0.00000  | -0.50215 | 0.00000  | 0.00000  |
| 45 | C3 | DXX | -0.03794 | -0.00208 | 0.00000  | -0.01382 | 0.03525  |
| 46 | C3 | DYY | -0.03821 | 0.03121  | 0.00000  | -0.00701 | 0.01420  |
| 47 | C3 | DZZ | 0.01945  | -0.02614 | 0.00000  | 0.01010  | 0.00326  |
| 48 | C3 | DXY | -0.00990 | -0.07622 | 0.00000  | 0.03715  | 0.05070  |
| 49 | C3 | DXZ | 0.00000  | 0.00000  | -0.03186 | 0.00000  | 0.00000  |
| 50 | C3 | DYZ | 0.00000  | 0.00000  | 0.01463  | 0.00000  | 0.00000  |
| 51 | C4 | S   | -0.00956 | -0.01251 | 0.00000  | 0.00004  | 0.00111  |
| 52 | C4 | S   | 0.07598  | 0.40280  | 0.00000  | 0.21763  | 0.12736  |
| 53 | C4 | PX  | 0.12961  | 0.25064  | 0.00000  | -0.19605 | 0.03407  |
| 54 | C4 | PY  | 0.07370  | 0.40080  | 0.00000  | -0.02031 | 0.28412  |
| 55 | C4 | PZ  | 0.00000  | 0.00000  | 0.05565  | 0.00000  | 0.00000  |
| 56 | C4 | S   | -0.25789 | -0.52527 | 0.00000  | -1.40315 | -0.67559 |
| 57 | C4 | PX  | 0.15831  | -0.73135 | 0.00000  | 0.92884  | -0.07601 |
| 58 | C4 | PY  | -0.43667 | -1.07665 | 0.00000  | 0.85378  | -0.83388 |
| 59 | C4 | PZ  | 0.00000  | 0.00000  | -0.14579 | 0.00000  | 0.00000  |
| 60 | C4 | DXX | -0.02195 | 0.06281  | 0.00000  | -0.01076 | -0.02057 |
| 61 | C4 | DYY | 0.00202  | -0.07214 | 0.00000  | -0.01269 | 0.01305  |
| 62 | C4 | DZZ | 0.02112  | 0.05569  | 0.00000  | 0.01629  | 0.01415  |
| 63 | C4 | DXY | -0.04709 | -0.09860 | 0.00000  | -0.04468 | -0.01680 |
| 64 | C4 | DXZ | 0.00000  | 0.00000  | -0.00406 | 0.00000  | 0.00000  |
| 65 | C4 | DYZ | 0.00000  | 0.00000  | -0.01977 | 0.00000  | 0.00000  |
| 66 | C5 | S   | -0.00416 | -0.01300 | 0.00000  | -0.01236 | -0.00470 |
| 67 | C5 | S   | 0.16433  | 0.61231  | 0.00000  | 0.21094  | 0.13825  |
| 68 | C5 | PX  | -0.13295 | -0.21572 | 0.00000  | -0.45296 | -0.24431 |
| 69 | C5 | PY  | 0.21547  | 0.31920  | 0.00000  | 0.41744  | -0.01744 |
| 70 | C5 | PZ  | 0.00000  | 0.00000  | 0.05784  | 0.00000  | 0.00000  |
| 71 | C5 | S   | 0.43439  | -1.96403 | 0.00000  | 0.25378  | -1.52653 |
| 72 | C5 | PX  | 0.98076  | 0.14931  | 0.00000  | 1.44675  | 1.12850  |
| 73 | C5 | PY  | -0.94135 | -0.38798 | 0.00000  | -1.51772 | 0.54397  |
| 74 | C5 | PZ  | 0.00000  | 0.00000  | -0.03199 | 0.00000  | 0.00000  |
| 75 | C5 | DXX | -0.02186 | 0.04033  | 0.00000  | 0.04771  | -0.00633 |
| 76 | C5 | DYY | 0.04931  | -0.07688 | 0.00000  | -0.06809 | -0.01810 |
| 77 | C5 | DZZ | 0.00758  | 0.07605  | 0.00000  | 0.04842  | 0.01176  |
| 78 | C5 | DXY | 0.05699  | 0.10955  | 0.00000  | 0.06139  | -0.04465 |
| 79 | C5 | DXZ | 0.00000  | 0.00000  | 0.01574  | 0.00000  | 0.00000  |
| 80 | C5 | DYZ | 0.00000  | 0.00000  | -0.02391 | 0.00000  | 0.00000  |
| 81 | C6 | S   | -0.00697 | 0.00329  | 0.00000  | 0.01269  | -0.00080 |
| 82 | C6 | S   | -0.10397 | -0.13040 | 0.00000  | -0.01895 | -0.41561 |
| 83 | C6 | PX  | -0.10133 | 0.13253  | 0.00000  | -0.20139 | 0.12261  |
| 84 | C6 | PY  | -0.15027 | -0.02744 | 0.00000  | -0.02467 | -0.04514 |
| 85 | C6 | PZ  | 0.00000  | 0.00000  | -0.31306 | 0.00000  | 0.00000  |
| 86 | C6 | S   | 1.30742  | 0.11707  | 0.00000  | 1.22989  | 2.34602  |
| 87 | C6 | PX  | 0.49481  | -0.77553 | 0.00000  | 1.08428  | -1.61357 |
| 88 | C6 | PY  | 1.18253  | -0.28445 | 0.00000  | -1.30990 | -0.51188 |
| 89 | C6 | PZ  | 0.00000  | 0.00000  | 0.96836  | 0.00000  | 0.00000  |
| 90 | C6 | DXX | -0.00501 | 0.00055  | 0.00000  | 0.01156  | -0.01197 |
| 91 | C6 | DYY | 0.01980  | -0.01976 | 0.00000  | 0.04950  | 0.00856  |
| 92 | C6 | DZZ | -0.00707 | -0.00085 | 0.00000  | -0.01783 | -0.02507 |
| 93 | C6 | DXY | -0.04410 | 0.03585  | 0.00000  | 0.03060  | -0.03464 |
| 94 | C6 | DXZ | 0.00000  | 0.00000  | 0.01148  | 0.00000  | 0.00000  |
| 95 | C6 | DYZ | 0.00000  | 0.00000  | -0.07510 | 0.00000  | 0.00000  |

|     |    |     |          |          |          |          |          |
|-----|----|-----|----------|----------|----------|----------|----------|
| 96  | C7 | S   | -0.00777 | -0.00621 | 0.00000  | 0.01015  | 0.02339  |
| 97  | C7 | S   | 0.16953  | 0.20728  | 0.00000  | -0.21837 | 0.76796  |
| 98  | C7 | PX  | 0.52263  | 0.12899  | 0.00000  | -0.18729 | -0.02504 |
| 99  | C7 | PY  | -0.03350 | 0.26366  | 0.00000  | -0.01214 | -0.53624 |
| 100 | C7 | PZ  | 0.00000  | 0.00000  | 0.04454  | 0.00000  | 0.00000  |
| 101 | C7 | S   | 1.12712  | -0.91158 | 0.00000  | 0.64794  | -2.21606 |
| 102 | C7 | PX  | -2.45689 | -0.40255 | 0.00000  | 0.45995  | 0.86971  |
| 103 | C7 | PY  | 0.27356  | -1.12461 | 0.00000  | 0.26469  | 2.17836  |
| 104 | C7 | PZ  | 0.00000  | 0.00000  | -0.10557 | 0.00000  | 0.00000  |
| 105 | C7 | DXX | 0.00214  | 0.03500  | 0.00000  | 0.03295  | -0.03810 |
| 106 | C7 | DYY | 0.05993  | -0.04556 | 0.00000  | -0.02340 | 0.14226  |
| 107 | C7 | DZZ | -0.00084 | 0.02233  | 0.00000  | -0.03005 | 0.01067  |
| 108 | C7 | DXY | 0.06603  | 0.05030  | 0.00000  | -0.05488 | -0.04904 |
| 109 | C7 | DXZ | 0.00000  | 0.00000  | -0.03184 | 0.00000  | 0.00000  |
| 110 | C7 | DYZ | 0.00000  | 0.00000  | -0.03660 | 0.00000  | 0.00000  |
| 111 | H3 | S   | -0.09521 | -0.30212 | 0.00000  | -0.04840 | -0.04673 |
| 112 | H3 | S   | 0.34364  | 1.28929  | 0.00000  | -0.35559 | 0.57514  |
| 113 | H3 | PX  | 0.00035  | -0.02612 | 0.00000  | -0.01033 | -0.02775 |
| 114 | H3 | PY  | -0.02993 | -0.08537 | 0.00000  | 0.00767  | -0.03135 |
| 115 | H3 | PZ  | 0.00000  | 0.00000  | -0.00950 | 0.00000  | 0.00000  |
| 116 | H4 | S   | -0.12130 | -0.31945 | 0.00000  | -0.27894 | 0.06184  |
| 117 | H4 | S   | 0.78610  | 1.06050  | 0.00000  | 1.53118  | 0.17635  |
| 118 | H4 | PX  | 0.02252  | 0.03778  | 0.00000  | 0.02882  | -0.00348 |
| 119 | H4 | PY  | -0.03700 | -0.07828 | 0.00000  | -0.09209 | -0.02060 |
| 120 | H4 | PZ  | 0.00000  | 0.00000  | -0.00880 | 0.00000  | 0.00000  |
| 121 | N1 | S   | 0.00606  | -0.00277 | 0.00000  | 0.01710  | 0.00780  |
| 122 | N1 | S   | -0.02725 | 0.06148  | 0.00000  | 0.07680  | -0.13461 |
| 123 | N1 | PX  | 0.05354  | -0.21793 | 0.00000  | -0.03580 | 0.01674  |
| 124 | N1 | PY  | -0.12702 | 0.09998  | 0.00000  | 0.10893  | 0.05458  |
| 125 | N1 | PZ  | 0.00000  | 0.00000  | 0.94786  | 0.00000  | 0.00000  |
| 126 | N1 | S   | 0.27273  | -0.22168 | 0.00000  | -0.65558 | -0.69961 |
| 127 | N1 | PX  | -0.07039 | 0.49795  | 0.00000  | -0.25869 | -0.12042 |
| 128 | N1 | PY  | 0.32673  | -0.36452 | 0.00000  | -0.69708 | -0.92731 |
| 129 | N1 | PZ  | 0.00000  | 0.00000  | -1.51403 | 0.00000  | 0.00000  |
| 130 | N1 | DXX | 0.02060  | 0.03103  | 0.00000  | 0.02813  | -0.04825 |
| 131 | N1 | DYY | -0.00718 | -0.00603 | 0.00000  | 0.03648  | -0.06161 |
| 132 | N1 | DZZ | -0.01784 | 0.02609  | 0.00000  | -0.00904 | 0.02173  |
| 133 | N1 | DXY | 0.02780  | 0.00702  | 0.00000  | -0.03907 | -0.04660 |
| 134 | N1 | DXZ | 0.00000  | 0.00000  | 0.04814  | 0.00000  | 0.00000  |
| 135 | N1 | DYZ | 0.00000  | 0.00000  | 0.01921  | 0.00000  | 0.00000  |
| 136 | H6 | S   | 0.14534  | -0.23023 | 0.00000  | 0.17851  | 0.13615  |
| 137 | H6 | S   | -1.69128 | 1.23714  | 0.00000  | -0.95466 | 0.37991  |
| 138 | H6 | PX  | -0.08929 | 0.07584  | 0.00000  | -0.06576 | 0.01048  |
| 139 | H6 | PY  | -0.00209 | -0.02689 | 0.00000  | -0.01525 | 0.00183  |
| 140 | H6 | PZ  | 0.00000  | 0.00000  | -0.01159 | 0.00000  | 0.00000  |
| 141 | C8 | S   | 0.00664  | 0.00054  | 0.00000  | 0.00278  | -0.01994 |
| 142 | C8 | S   | 0.20223  | 0.17648  | 0.00000  | 0.14697  | -0.27329 |
| 143 | C8 | PX  | 0.24871  | 0.09104  | 0.00000  | -0.15870 | -0.46762 |
| 144 | C8 | PY  | 0.11548  | 0.06466  | 0.00000  | 0.06945  | -0.15561 |
| 145 | C8 | PZ  | 0.00000  | 0.00000  | -0.17311 | 0.00000  | 0.00000  |
| 146 | C8 | S   | -1.14689 | -0.82305 | 0.00000  | -0.13973 | 1.20743  |
| 147 | C8 | PX  | -1.51533 | -0.25296 | 0.00000  | 0.61968  | 2.24809  |
| 148 | C8 | PY  | -0.87249 | -0.61949 | 0.00000  | -0.21094 | 1.39999  |
| 149 | C8 | PZ  | 0.00000  | 0.00000  | 0.65172  | 0.00000  | 0.00000  |



|     |     |     |          |          |          |          |          |
|-----|-----|-----|----------|----------|----------|----------|----------|
| 150 | C8  | DXX | 0.00693  | -0.04576 | 0.00000  | 0.00092  | 0.06237  |
| 151 | C8  | DYY | 0.01364  | 0.02035  | 0.00000  | 0.02505  | -0.08530 |
| 152 | C8  | DZZ | 0.00576  | 0.01873  | 0.00000  | 0.00000  | -0.00939 |
| 153 | C8  | DXY | -0.01691 | 0.02242  | 0.00000  | 0.01910  | 0.04331  |
| 154 | C8  | DXZ | 0.00000  | 0.00000  | 0.02388  | 0.00000  | 0.00000  |
| 155 | C8  | DYZ | 0.00000  | 0.00000  | 0.04817  | 0.00000  | 0.00000  |
| 156 | H8  | S   | -0.07820 | -0.02704 | 0.00000  | 0.10042  | -0.12421 |
| 157 | H8  | S   | 1.41266  | 0.19734  | 0.00000  | -0.55942 | 0.54773  |
| 158 | H8  | PX  | -0.05885 | -0.01592 | 0.00000  | 0.03632  | -0.04408 |
| 159 | H8  | PY  | 0.03062  | -0.00421 | 0.00000  | -0.00304 | 0.02535  |
| 160 | H8  | PZ  | 0.00000  | 0.00000  | -0.00961 | 0.00000  | 0.00000  |
| 161 | C10 | S   | -0.01086 | 0.00475  | 0.00000  | 0.00313  | -0.01620 |
| 162 | C10 | S   | 0.15292  | 0.11517  | 0.00000  | -0.06240 | -0.07303 |
| 163 | C10 | PX  | -0.53911 | 0.12922  | 0.00000  | 0.00792  | -0.10317 |
| 164 | C10 | PY  | 0.02316  | 0.01869  | 0.00000  | 0.00615  | -0.22663 |
| 165 | C10 | PZ  | 0.00000  | 0.00000  | -0.05425 | 0.00000  | 0.00000  |
| 166 | C10 | S   | -0.61062 | -0.41966 | 0.00000  | 0.06110  | 0.72734  |
| 167 | C10 | PX  | 1.76168  | -0.30700 | 0.00000  | -0.15516 | -0.01185 |
| 168 | C10 | PY  | -0.20853 | -0.25237 | 0.00000  | -0.08945 | 0.91707  |
| 169 | C10 | PZ  | 0.00000  | 0.00000  | -0.08302 | 0.00000  | 0.00000  |
| 170 | C10 | DXX | -0.02818 | 0.01462  | 0.00000  | 0.01487  | -0.08763 |
| 171 | C10 | DYY | 0.00385  | 0.01055  | 0.00000  | -0.00947 | 0.01405  |
| 172 | C10 | DZZ | 0.02680  | -0.00346 | 0.00000  | -0.01576 | 0.04924  |
| 173 | C10 | DXY | -0.07116 | 0.00044  | 0.00000  | 0.01269  | 0.00423  |
| 174 | C10 | DXZ | 0.00000  | 0.00000  | 0.04584  | 0.00000  | 0.00000  |
| 175 | C10 | DYZ | 0.00000  | 0.00000  | -0.01389 | 0.00000  | 0.00000  |
| 176 | H16 | S   | 0.06006  | 0.01312  | 0.00000  | -0.03790 | -0.28706 |
| 177 | H16 | S   | -0.90755 | 0.07101  | 0.00000  | 0.03554  | 0.44720  |
| 178 | H16 | PX  | 0.03399  | -0.01343 | 0.00000  | 0.00581  | -0.00686 |
| 179 | H16 | PY  | -0.03953 | 0.00762  | 0.00000  | 0.00704  | 0.02563  |
| 180 | H16 | PZ  | 0.00000  | 0.00000  | 0.00919  | 0.00000  | 0.00000  |
| 181 | H18 | S   | -0.20992 | -0.02972 | 0.00000  | 0.07859  | -0.02687 |
| 182 | H18 | S   | 1.13908  | -0.17302 | 0.00000  | -0.20210 | 0.35309  |
| 183 | H18 | PX  | 0.06440  | -0.01160 | 0.00000  | -0.00488 | 0.04027  |
| 184 | H18 | PY  | 0.04515  | -0.00043 | 0.00000  | -0.01018 | -0.02164 |
| 185 | H18 | PZ  | 0.00000  | 0.00000  | -0.01369 | 0.00000  | 0.00000  |

|              |          |          |          |          |          |
|--------------|----------|----------|----------|----------|----------|
| MO:          | 86       | 87       | 88       | 89       | 90       |
| Eigenvalues: | 1.17402  | 1.20020  | 1.20276  | 1.21434  | 1.26398  |
| (ev):        | 31.94659 | 32.65918 | 32.72891 | 33.04385 | 34.39462 |

|    |    |    |          |          |          |          |          |
|----|----|----|----------|----------|----------|----------|----------|
|    |    | A  | A        | A        | A        | A        |          |
| 1  | H1 | S  | 0.02982  | 0.15425  | -0.02512 | -0.00349 | 0.17840  |
| 2  | H1 | S  | -0.01642 | -0.18456 | -0.13090 | -0.06578 | 0.63368  |
| 3  | H1 | PX | -0.00079 | 0.01526  | 0.00471  | -0.00137 | -0.02843 |
| 4  | H1 | PY | -0.00075 | 0.01216  | -0.00375 | -0.00353 | 0.02074  |
| 5  | H1 | PZ | 0.00000  | 0.00000  | 0.00000  | 0.00000  | 0.00000  |
| 6  | C1 | S  | 0.00043  | -0.00549 | -0.00708 | -0.00081 | -0.00759 |
| 7  | C1 | S  | -0.06755 | 0.34765  | -0.27529 | 0.12050  | 0.00406  |
| 8  | C1 | PX | 0.04921  | -0.18605 | -0.02605 | -0.08978 | 0.30258  |
| 9  | C1 | PY | -0.02900 | -0.11016 | 0.23567  | 0.66862  | 0.25385  |
| 10 | C1 | PZ | 0.00000  | 0.00000  | 0.00000  | 0.00000  | 0.00000  |
| 11 | C1 | S  | 0.05709  | -1.55995 | 0.23819  | -1.29299 | -0.83817 |
| 12 | C1 | PX | 0.03460  | 0.23998  | 0.03533  | 0.40369  | -0.76290 |

|    |    |     |          |          |          |          |          |
|----|----|-----|----------|----------|----------|----------|----------|
| 13 | C1 | PY  | 0.13812  | 0.23158  | -0.96220 | -3.81727 | -2.51393 |
| 14 | C1 | PZ  | 0.00000  | 0.00000  | 0.00000  | 0.00000  | 0.00000  |
| 15 | C1 | DXX | -0.01506 | 0.09285  | -0.00417 | 0.02323  | -0.01546 |
| 16 | C1 | DYY | 0.00244  | -0.05461 | -0.05176 | -0.03558 | -0.03666 |
| 17 | C1 | DZZ | 0.00448  | -0.00586 | -0.00328 | 0.01214  | 0.04332  |
| 18 | C1 | DXY | -0.00012 | -0.00791 | 0.02814  | 0.13399  | 0.07887  |
| 19 | C1 | DXZ | 0.00000  | 0.00000  | 0.00000  | 0.00000  | 0.00000  |
| 20 | C1 | DYZ | 0.00000  | 0.00000  | 0.00000  | 0.00000  | 0.00000  |
| 21 | C2 | S   | 0.00378  | 0.00391  | 0.00514  | -0.00095 | 0.00602  |
| 22 | C2 | S   | 0.22732  | -0.36090 | -0.14346 | -0.01731 | 0.15227  |
| 23 | C2 | PX  | -0.01359 | -0.14057 | 0.23699  | -0.00288 | 0.22004  |
| 24 | C2 | PY  | 0.02847  | -0.17489 | -0.44312 | 0.12019  | -0.18691 |
| 25 | C2 | PZ  | 0.00000  | 0.00000  | 0.00000  | 0.00000  | 0.00000  |
| 26 | C2 | S   | -0.62406 | 1.88838  | 0.72687  | 0.35458  | 0.57820  |
| 27 | C2 | PX  | -0.08463 | 0.34407  | -0.24005 | -0.05462 | -0.79441 |
| 28 | C2 | PY  | 0.21044  | 1.32691  | 2.62770  | -1.22201 | 3.18247  |
| 29 | C2 | PZ  | 0.00000  | 0.00000  | 0.00000  | 0.00000  | 0.00000  |
| 30 | C2 | DXX | 0.01515  | -0.07404 | 0.04534  | -0.03311 | 0.00484  |
| 31 | C2 | DYY | 0.01010  | 0.04205  | -0.02651 | 0.02238  | 0.06641  |
| 32 | C2 | DZZ | 0.00189  | -0.00075 | -0.02789 | 0.01855  | -0.03776 |
| 33 | C2 | DXY | -0.01155 | 0.02994  | 0.10390  | -0.03178 | 0.03956  |
| 34 | C2 | DXZ | 0.00000  | 0.00000  | 0.00000  | 0.00000  | 0.00000  |
| 35 | C2 | DYZ | 0.00000  | 0.00000  | 0.00000  | 0.00000  | 0.00000  |
| 36 | C3 | S   | -0.00064 | -0.01691 | 0.01196  | 0.01546  | -0.00012 |
| 37 | C3 | S   | 0.09304  | -0.25381 | 0.17235  | 0.39603  | 0.12115  |
| 38 | C3 | PX  | 0.07569  | -0.16453 | -0.15801 | 0.28299  | 0.39109  |
| 39 | C3 | PY  | -0.09202 | -0.22271 | 0.22287  | 0.27148  | -0.01952 |
| 40 | C3 | PZ  | 0.00000  | 0.00000  | 0.00000  | 0.00000  | 0.00000  |
| 41 | C3 | S   | -0.41952 | 1.51557  | 0.24854  | -3.02710 | 0.41529  |
| 42 | C3 | PX  | -0.22632 | 0.57515  | 0.01236  | -1.22808 | -2.81676 |
| 43 | C3 | PY  | 0.40820  | -0.02519 | -0.48145 | -0.92170 | -1.37299 |
| 44 | C3 | PZ  | 0.00000  | 0.00000  | 0.00000  | 0.00000  | 0.00000  |
| 45 | C3 | DXX | 0.01984  | -0.00689 | 0.02157  | -0.02161 | 0.10048  |
| 46 | C3 | DYY | -0.02341 | -0.01259 | 0.05255  | 0.03138  | -0.04985 |
| 47 | C3 | DZZ | 0.00830  | -0.00794 | -0.02493 | 0.01637  | -0.00246 |
| 48 | C3 | DXY | 0.01598  | 0.00546  | -0.09004 | -0.09059 | -0.00497 |
| 49 | C3 | DXZ | 0.00000  | 0.00000  | 0.00000  | 0.00000  | 0.00000  |
| 50 | C3 | DYZ | 0.00000  | 0.00000  | 0.00000  | 0.00000  | 0.00000  |
| 51 | C4 | S   | -0.00389 | 0.03589  | -0.00719 | 0.00592  | -0.00346 |
| 52 | C4 | S   | -0.06130 | 0.95229  | -0.29495 | -0.29042 | -0.43402 |
| 53 | C4 | PX  | 0.15713  | -0.24603 | -0.21065 | -0.53497 | -0.02683 |
| 54 | C4 | PY  | 0.10127  | 0.38069  | -0.18968 | 0.17592  | 0.37645  |
| 55 | C4 | PZ  | 0.00000  | 0.00000  | 0.00000  | 0.00000  | 0.00000  |
| 56 | C4 | S   | 0.09990  | -3.68930 | 0.69608  | 2.17466  | 0.62021  |
| 57 | C4 | PX  | -0.47829 | 1.91673  | 0.96408  | 3.17756  | 1.96570  |
| 58 | C4 | PY  | -0.19932 | -1.62233 | 0.09430  | -1.30887 | -1.90869 |
| 59 | C4 | PZ  | 0.00000  | 0.00000  | 0.00000  | 0.00000  | 0.00000  |
| 60 | C4 | DXX | 0.00332  | -0.02465 | -0.03117 | -0.02011 | -0.04903 |
| 61 | C4 | DYY | -0.03247 | 0.15276  | 0.02758  | 0.03902  | -0.01408 |
| 62 | C4 | DZZ | 0.01167  | 0.01379  | -0.02476 | -0.02185 | 0.00498  |
| 63 | C4 | DXY | -0.00875 | 0.01329  | 0.02124  | -0.13067 | -0.01064 |
| 64 | C4 | DXZ | 0.00000  | 0.00000  | 0.00000  | 0.00000  | 0.00000  |
| 65 | C4 | DYZ | 0.00000  | 0.00000  | 0.00000  | 0.00000  | 0.00000  |
| 66 | C5 | S   | 0.00506  | -0.03562 | 0.00534  | -0.02091 | 0.01112  |

|     |    |     |          |          |          |          |          |
|-----|----|-----|----------|----------|----------|----------|----------|
| 67  | C5 | S   | 0.12064  | -0.71041 | 0.37952  | -0.64821 | 0.28367  |
| 68  | C5 | PX  | 0.04192  | -0.34590 | -0.19971 | -0.08425 | -0.15529 |
| 69  | C5 | PY  | 0.13953  | -0.40662 | -0.21747 | -0.10079 | -0.01835 |
| 70  | C5 | PZ  | 0.00000  | 0.00000  | 0.00000  | 0.00000  | 0.00000  |
| 71  | C5 | S   | -0.56635 | 2.04909  | -1.85001 | 3.38599  | -1.49108 |
| 72  | C5 | PX  | -0.13249 | 2.54989  | 1.52706  | 0.57690  | 2.54843  |
| 73  | C5 | PY  | -0.26009 | 2.02415  | 0.81927  | 0.46335  | 1.50861  |
| 74  | C5 | PZ  | 0.00000  | 0.00000  | 0.00000  | 0.00000  | 0.00000  |
| 75  | C5 | DXX | -0.01340 | 0.01516  | 0.01666  | 0.00844  | -0.00670 |
| 76  | C5 | DYY | 0.02403  | -0.13713 | 0.02368  | -0.09960 | 0.02490  |
| 77  | C5 | DZZ | 0.00180  | -0.00064 | 0.00325  | 0.00221  | 0.00326  |
| 78  | C5 | DXY | 0.01664  | -0.02790 | -0.09909 | 0.08860  | -0.01449 |
| 79  | C5 | DXZ | 0.00000  | 0.00000  | 0.00000  | 0.00000  | 0.00000  |
| 80  | C5 | DYZ | 0.00000  | 0.00000  | 0.00000  | 0.00000  | 0.00000  |
| 81  | C6 | S   | 0.00362  | 0.01127  | -0.01671 | -0.00441 | 0.00683  |
| 82  | C6 | S   | 0.22548  | 0.00731  | -0.71668 | 0.21291  | 0.47793  |
| 83  | C6 | PX  | 0.01189  | 0.00726  | 0.28164  | -0.22466 | 0.45889  |
| 84  | C6 | PY  | -0.12125 | 0.13837  | -0.03506 | -0.00409 | -0.07566 |
| 85  | C6 | PZ  | 0.00000  | 0.00000  | 0.00000  | 0.00000  | 0.00000  |
| 86  | C6 | S   | -0.05713 | 0.38652  | 3.58425  | -1.43611 | -1.33693 |
| 87  | C6 | PX  | -0.31697 | -0.33185 | -1.75955 | 1.19538  | -3.22320 |
| 88  | C6 | PY  | 0.17908  | -0.09473 | -0.31675 | -0.05305 | 1.58787  |
| 89  | C6 | PZ  | 0.00000  | 0.00000  | 0.00000  | 0.00000  | 0.00000  |
| 90  | C6 | DXX | 0.01593  | 0.02789  | -0.01338 | -0.02724 | 0.04086  |
| 91  | C6 | DYY | 0.03097  | 0.01510  | 0.02129  | 0.00037  | 0.03170  |
| 92  | C6 | DZZ | -0.00401 | -0.01444 | -0.03711 | 0.02904  | -0.00852 |
| 93  | C6 | DXY | -0.03440 | -0.00245 | 0.03290  | 0.01251  | -0.10589 |
| 94  | C6 | DXZ | 0.00000  | 0.00000  | 0.00000  | 0.00000  | 0.00000  |
| 95  | C6 | DYZ | 0.00000  | 0.00000  | 0.00000  | 0.00000  | 0.00000  |
| 96  | C7 | S   | -0.00345 | 0.00828  | -0.01009 | -0.00074 | -0.01602 |
| 97  | C7 | S   | 0.08350  | -0.27386 | 0.27957  | 0.43891  | -0.57739 |
| 98  | C7 | PX  | 0.11993  | 0.13093  | -0.04332 | 0.18815  | -0.08773 |
| 99  | C7 | PY  | -0.15456 | -0.06913 | 0.38695  | 0.09112  | -0.01390 |
| 100 | C7 | PZ  | 0.00000  | 0.00000  | 0.00000  | 0.00000  | 0.00000  |
| 101 | C7 | S   | -0.15908 | -0.01967 | -0.24102 | -0.49171 | 0.91196  |
| 102 | C7 | PX  | -0.47843 | -0.15750 | 0.06766  | -0.50881 | 1.00507  |
| 103 | C7 | PY  | 0.72599  | -0.58314 | -1.04769 | 0.25107  | 0.03226  |
| 104 | C7 | PZ  | 0.00000  | 0.00000  | 0.00000  | 0.00000  | 0.00000  |
| 105 | C7 | DXX | -0.04215 | -0.04086 | 0.03900  | 0.00997  | -0.07766 |
| 106 | C7 | DYY | 0.04307  | 0.00038  | -0.01082 | 0.03111  | 0.00811  |
| 107 | C7 | DZZ | 0.00897  | -0.00496 | -0.00030 | 0.01406  | -0.01006 |
| 108 | C7 | DXY | -0.00554 | 0.03024  | 0.05358  | -0.01270 | 0.01595  |
| 109 | C7 | DXZ | 0.00000  | 0.00000  | 0.00000  | 0.00000  | 0.00000  |
| 110 | C7 | DYZ | 0.00000  | 0.00000  | 0.00000  | 0.00000  | 0.00000  |
| 111 | H3 | S   | -0.04781 | 0.15901  | 0.13852  | -0.06487 | 0.12199  |
| 112 | H3 | S   | 0.28303  | 0.81409  | -0.63899 | -0.21501 | 0.35505  |
| 113 | H3 | PX  | -0.00370 | -0.02095 | 0.00474  | 0.00375  | 0.00010  |
| 114 | H3 | PY  | -0.01988 | -0.04504 | 0.04639  | 0.02075  | -0.01778 |
| 115 | H3 | PZ  | 0.00000  | 0.00000  | 0.00000  | 0.00000  | 0.00000  |
| 116 | H4 | S   | -0.00839 | -0.07042 | 0.17849  | -0.22074 | 0.01434  |
| 117 | H4 | S   | 0.19953  | -0.62980 | 0.05735  | -0.24348 | 0.18890  |
| 118 | H4 | PX  | 0.01387  | -0.01809 | -0.01617 | -0.01871 | 0.02825  |
| 119 | H4 | PY  | -0.00895 | 0.03032  | -0.00574 | 0.00930  | -0.00002 |
| 120 | H4 | PZ  | 0.00000  | 0.00000  | 0.00000  | 0.00000  | 0.00000  |

|     |     |     |          |          |          |          |          |
|-----|-----|-----|----------|----------|----------|----------|----------|
| 121 | N1  | S   | 0.01386  | -0.00735 | -0.00269 | 0.00488  | 0.00297  |
| 122 | N1  | S   | -0.05895 | 0.04656  | -0.22175 | -0.04685 | -0.07672 |
| 123 | N1  | PX  | 0.13272  | 0.06901  | -0.11266 | -0.08660 | -0.01055 |
| 124 | N1  | PY  | -0.08366 | 0.13138  | 0.25103  | -0.03497 | -0.31504 |
| 125 | N1  | PZ  | 0.00000  | 0.00000  | 0.00000  | 0.00000  | 0.00000  |
| 126 | N1  | S   | -0.01992 | -0.04897 | -0.38978 | 0.36216  | 0.16757  |
| 127 | N1  | PX  | -0.31967 | -0.02024 | 0.52236  | -0.16813 | 0.34862  |
| 128 | N1  | PY  | -0.05802 | -0.16423 | -1.28405 | 0.29980  | 0.67328  |
| 129 | N1  | PZ  | 0.00000  | 0.00000  | 0.00000  | 0.00000  | 0.00000  |
| 130 | N1  | DXX | 0.00473  | 0.03278  | -0.02793 | -0.01518 | 0.02806  |
| 131 | N1  | DYY | 0.00108  | -0.03702 | -0.13240 | 0.01536  | -0.02815 |
| 132 | N1  | DZZ | -0.03357 | -0.00731 | 0.01309  | -0.00058 | -0.01728 |
| 133 | N1  | DXY | 0.01098  | -0.01298 | -0.04327 | 0.03308  | 0.04829  |
| 134 | N1  | DXZ | 0.00000  | 0.00000  | 0.00000  | 0.00000  | 0.00000  |
| 135 | N1  | DYZ | 0.00000  | 0.00000  | 0.00000  | 0.00000  | 0.00000  |
| 136 | H6  | S   | -0.02761 | -0.07790 | 0.20001  | -0.00233 | -0.20073 |
| 137 | H6  | S   | 0.06008  | 0.14334  | -0.41071 | 0.03213  | -0.41419 |
| 138 | H6  | PX  | 0.00982  | 0.00600  | -0.04339 | -0.00182 | -0.01086 |
| 139 | H6  | PY  | 0.01174  | -0.00761 | -0.01114 | -0.01366 | 0.01810  |
| 140 | H6  | PZ  | 0.00000  | 0.00000  | 0.00000  | 0.00000  | 0.00000  |
| 141 | C8  | S   | -0.00514 | 0.00803  | 0.01300  | -0.01142 | -0.00522 |
| 142 | C8  | S   | -0.27157 | 0.21871  | 0.36240  | -0.35597 | -0.20155 |
| 143 | C8  | PX  | -0.09786 | 0.10837  | -0.03349 | -0.08860 | 0.11672  |
| 144 | C8  | PY  | 0.08733  | 0.15060  | 0.18001  | -0.08374 | 0.02727  |
| 145 | C8  | PZ  | 0.00000  | 0.00000  | 0.00000  | 0.00000  | 0.00000  |
| 146 | C8  | S   | 0.72681  | -0.59598 | -1.40413 | 1.01669  | 0.88660  |
| 147 | C8  | PX  | 0.28867  | -0.14063 | 0.35052  | -0.11025 | -0.25600 |
| 148 | C8  | PY  | 0.00175  | -0.15192 | -0.55630 | -0.45321 | 0.43465  |
| 149 | C8  | PZ  | 0.00000  | 0.00000  | 0.00000  | 0.00000  | 0.00000  |
| 150 | C8  | DXX | 0.01477  | -0.00023 | -0.03786 | -0.06146 | -0.00267 |
| 151 | C8  | DYY | -0.00163 | 0.04755  | 0.06814  | -0.02468 | 0.00842  |
| 152 | C8  | DZZ | -0.01630 | -0.00853 | -0.00500 | 0.01393  | -0.00880 |
| 153 | C8  | DXY | -0.01850 | -0.01860 | 0.03514  | 0.00282  | -0.02917 |
| 154 | C8  | DXZ | 0.00000  | 0.00000  | 0.00000  | 0.00000  | 0.00000  |
| 155 | C8  | DYZ | 0.00000  | 0.00000  | 0.00000  | 0.00000  | 0.00000  |
| 156 | H8  | S   | -0.03794 | -0.18092 | -0.18951 | 0.10342  | -0.06811 |
| 157 | H8  | S   | 0.61753  | 0.08502  | -0.08783 | 0.43705  | -0.65646 |
| 158 | H8  | PX  | -0.01725 | -0.01819 | -0.00725 | -0.03463 | 0.01572  |
| 159 | H8  | PY  | 0.01462  | 0.00080  | -0.01749 | -0.01368 | -0.02375 |
| 160 | H8  | PZ  | 0.00000  | 0.00000  | 0.00000  | 0.00000  | 0.00000  |
| 161 | C10 | S   | 0.01956  | -0.00068 | 0.00709  | 0.01095  | -0.00503 |
| 162 | C10 | S   | -1.08540 | -0.04953 | -0.10628 | 0.08333  | 0.31377  |
| 163 | C10 | PX  | -0.03293 | 0.02342  | 0.19243  | -0.01595 | 0.09102  |
| 164 | C10 | PY  | 0.52524  | 0.18242  | 0.24474  | -0.00558 | 0.01001  |
| 165 | C10 | PZ  | 0.00000  | 0.00000  | 0.00000  | 0.00000  | 0.00000  |
| 166 | C10 | S   | 2.26069  | 0.35197  | 0.49022  | -0.83420 | -0.55050 |
| 167 | C10 | PX  | 0.07093  | -0.26290 | -0.52147 | 0.21881  | -0.35028 |
| 168 | C10 | PY  | -0.89295 | -0.28458 | -0.57391 | -0.32526 | 0.15355  |
| 169 | C10 | PZ  | 0.00000  | 0.00000  | 0.00000  | 0.00000  | 0.00000  |
| 170 | C10 | DXX | 0.15461  | 0.03697  | 0.07684  | 0.02278  | -0.01016 |
| 171 | C10 | DYY | -0.11933 | -0.01599 | -0.01465 | 0.00019  | -0.00017 |
| 172 | C10 | DZZ | -0.13357 | -0.02425 | -0.05887 | -0.00187 | 0.04114  |
| 173 | C10 | DXY | -0.02055 | -0.04529 | 0.00171  | 0.02498  | -0.02062 |
| 174 | C10 | DXZ | 0.00000  | 0.00000  | 0.00000  | 0.00000  | 0.00000  |

|     |     |     |          |          |          |          |          |
|-----|-----|-----|----------|----------|----------|----------|----------|
| 175 | C10 | DYZ | 0.00000  | 0.00000  | 0.00000  | 0.00000  | 0.00000  |
| 176 | H16 | S   | 0.50713  | 0.19854  | 0.05267  | -0.01495 | 0.04475  |
| 177 | H16 | S   | -1.33270 | -0.25463 | -0.22129 | -0.05092 | 0.39493  |
| 178 | H16 | PX  | 0.11384  | 0.01373  | 0.01124  | 0.00628  | -0.02611 |
| 179 | H16 | PY  | -0.02789 | -0.02136 | 0.00888  | 0.01244  | -0.00809 |
| 180 | H16 | PZ  | 0.00000  | 0.00000  | 0.00000  | 0.00000  | 0.00000  |
| 181 | H18 | S   | 0.55364  | -0.07371 | 0.15066  | 0.17433  | -0.16281 |
| 182 | H18 | S   | -1.22153 | -0.27387 | -0.75350 | 0.03319  | 0.15690  |
| 183 | H18 | PX  | -0.09914 | -0.01813 | -0.04504 | -0.00080 | 0.00088  |
| 184 | H18 | PY  | -0.01555 | 0.01729  | -0.01413 | -0.01162 | 0.01957  |
| 185 | H18 | PZ  | 0.00000  | 0.00000  | 0.00000  | 0.00000  | 0.00000  |

|              |          |          |          |          |          |
|--------------|----------|----------|----------|----------|----------|
| MO:          | 91       | 92       | 93       | 94       | 95       |
| Eigenvalues: | 1.28550  | 1.29727  | 1.37046  | 1.40396  | 1.42126  |
| (ev):        | 34.98037 | 35.30045 | 37.29226 | 38.20382 | 38.67438 |

|    |    |     |          |          |          |          |          |
|----|----|-----|----------|----------|----------|----------|----------|
|    |    |     | A        | A        | A        | A        | A        |
| 1  | H1 | S   | 0.08176  | 0.32724  | 0.15722  | -0.30634 | -0.03606 |
| 2  | H1 | S   | -0.02695 | 0.38163  | 0.42653  | -0.30806 | -0.04483 |
| 3  | H1 | PX  | 0.01234  | 0.00127  | -0.02084 | -0.01848 | -0.00855 |
| 4  | H1 | PY  | 0.01871  | -0.01196 | 0.01444  | -0.00484 | -0.02472 |
| 5  | H1 | PZ  | 0.00000  | 0.00000  | 0.00000  | 0.00000  | 0.00000  |
| 6  | C1 | S   | -0.00066 | 0.01213  | 0.01388  | 0.02867  | 0.01285  |
| 7  | C1 | S   | 0.29001  | 0.69833  | -0.10942 | 0.49163  | 0.16520  |
| 8  | C1 | PX  | -0.14965 | -0.02991 | 0.29158  | -0.12523 | 0.03211  |
| 9  | C1 | PY  | -0.02896 | -0.04825 | -0.03227 | 0.13323  | -0.11749 |
| 10 | C1 | PZ  | 0.00000  | 0.00000  | 0.00000  | 0.00000  | 0.00000  |
| 11 | C1 | S   | -0.12888 | -2.00109 | -1.35539 | -2.39296 | -1.03875 |
| 12 | C1 | PX  | -0.11789 | -0.19617 | -0.65799 | 1.55221  | 0.31980  |
| 13 | C1 | PY  | 1.04893  | -1.92623 | 1.63202  | 0.46968  | 0.29624  |
| 14 | C1 | PZ  | 0.00000  | 0.00000  | 0.00000  | 0.00000  | 0.00000  |
| 15 | C1 | DXX | 0.05804  | 0.08845  | 0.02382  | 0.00571  | 0.03950  |
| 16 | C1 | DYY | -0.00334 | -0.00541 | -0.07681 | 0.02875  | -0.00672 |
| 17 | C1 | DZZ | -0.00271 | 0.02603  | 0.01414  | -0.01331 | -0.03332 |
| 18 | C1 | DXY | 0.04332  | 0.04223  | -0.04458 | -0.01454 | -0.06889 |
| 19 | C1 | DXZ | 0.00000  | 0.00000  | 0.00000  | 0.00000  | 0.00000  |
| 20 | C1 | DYZ | 0.00000  | 0.00000  | 0.00000  | 0.00000  | 0.00000  |
| 21 | C2 | S   | -0.00488 | 0.02849  | 0.00422  | 0.01894  | 0.01561  |
| 22 | C2 | S   | 0.10943  | 0.71394  | 0.68584  | 0.38720  | 0.43304  |
| 23 | C2 | PX  | -0.09137 | 0.04622  | 0.32807  | -0.12236 | 0.03778  |
| 24 | C2 | PY  | 0.25441  | 0.03002  | 0.10944  | -0.11050 | -0.17597 |
| 25 | C2 | PZ  | 0.00000  | 0.00000  | 0.00000  | 0.00000  | 0.00000  |
| 26 | C2 | S   | -0.85015 | -2.66294 | -1.04144 | -2.34365 | -1.60061 |
| 27 | C2 | PX  | 0.52175  | 0.02981  | -0.17769 | 0.23828  | -0.35260 |
| 28 | C2 | PY  | -1.59912 | -0.34802 | -1.28915 | 1.04880  | -0.08324 |
| 29 | C2 | PZ  | 0.00000  | 0.00000  | 0.00000  | 0.00000  | 0.00000  |
| 30 | C2 | DXX | 0.02458  | 0.10596  | 0.09063  | 0.08192  | 0.04987  |
| 31 | C2 | DYY | -0.04705 | -0.01826 | 0.02015  | -0.01507 | 0.01613  |
| 32 | C2 | DZZ | 0.03518  | 0.00385  | 0.00305  | -0.01658 | -0.02109 |
| 33 | C2 | DXY | -0.06637 | -0.00258 | -0.06779 | 0.02503  | 0.06818  |
| 34 | C2 | DXZ | 0.00000  | 0.00000  | 0.00000  | 0.00000  | 0.00000  |
| 35 | C2 | DYZ | 0.00000  | 0.00000  | 0.00000  | 0.00000  | 0.00000  |
| 36 | C3 | S   | 0.01468  | -0.02188 | -0.02150 | -0.00165 | -0.00108 |
| 37 | C3 | S   | 0.75768  | -0.34630 | -0.59223 | -0.20060 | -0.16853 |

|    |    |     |          |          |          |          |          |
|----|----|-----|----------|----------|----------|----------|----------|
| 38 | C3 | PX  | -0.34584 | 0.24689  | -0.22166 | -0.21903 | 0.03637  |
| 39 | C3 | PY  | -0.06371 | -0.14317 | 0.04520  | 0.06427  | -0.40622 |
| 40 | C3 | PZ  | 0.00000  | 0.00000  | 0.00000  | 0.00000  | 0.00000  |
| 41 | C3 | S   | -0.92276 | 0.44397  | 2.72739  | 2.56475  | -0.24545 |
| 42 | C3 | PX  | 2.14701  | -2.05724 | 1.80153  | 1.20666  | 0.16241  |
| 43 | C3 | PY  | -0.36205 | -0.70337 | 0.79418  | 0.58811  | 1.61450  |
| 44 | C3 | PZ  | 0.00000  | 0.00000  | 0.00000  | 0.00000  | 0.00000  |
| 45 | C3 | DXX | 0.06279  | -0.08470 | -0.00898 | 0.01259  | -0.03283 |
| 46 | C3 | DYY | 0.09910  | -0.02870 | -0.02030 | 0.04790  | -0.00016 |
| 47 | C3 | DZZ | -0.02325 | 0.04019  | -0.01903 | -0.04811 | -0.01672 |
| 48 | C3 | DXY | 0.00575  | 0.00763  | -0.01232 | 0.02368  | -0.00616 |
| 49 | C3 | DXZ | 0.00000  | 0.00000  | 0.00000  | 0.00000  | 0.00000  |
| 50 | C3 | DYZ | 0.00000  | 0.00000  | 0.00000  | 0.00000  | 0.00000  |
| 51 | C4 | S   | -0.01411 | -0.02515 | 0.00801  | -0.00098 | 0.00729  |
| 52 | C4 | S   | -0.48466 | -0.56098 | 0.22895  | -0.00156 | 0.34241  |
| 53 | C4 | PX  | 0.06291  | -0.11912 | 0.09107  | -0.10442 | -0.07766 |
| 54 | C4 | PY  | 0.18599  | 0.05491  | 0.03764  | -0.08651 | -0.22133 |
| 55 | C4 | PZ  | 0.00000  | 0.00000  | 0.00000  | 0.00000  | 0.00000  |
| 56 | C4 | S   | 0.88028  | 3.08138  | -1.51700 | 0.91761  | -0.00728 |
| 57 | C4 | PX  | -1.31833 | 1.37951  | -0.50643 | -0.04630 | 0.43602  |
| 58 | C4 | PY  | 0.19437  | -0.47262 | -0.48189 | -0.24234 | 0.64138  |
| 59 | C4 | PZ  | 0.00000  | 0.00000  | 0.00000  | 0.00000  | 0.00000  |
| 60 | C4 | DXX | -0.06072 | -0.01445 | -0.01793 | -0.01309 | 0.06553  |
| 61 | C4 | DYY | -0.03733 | -0.07835 | 0.03797  | 0.08045  | 0.02918  |
| 62 | C4 | DZZ | 0.01574  | 0.01011  | 0.01225  | -0.05523 | -0.05023 |
| 63 | C4 | DXY | -0.04375 | -0.09783 | 0.04114  | -0.04163 | -0.00685 |
| 64 | C4 | DXZ | 0.00000  | 0.00000  | 0.00000  | 0.00000  | 0.00000  |
| 65 | C4 | DYZ | 0.00000  | 0.00000  | 0.00000  | 0.00000  | 0.00000  |
| 66 | C5 | S   | 0.00082  | -0.01153 | -0.02313 | -0.00057 | -0.00013 |
| 67 | C5 | S   | -0.32325 | -0.09708 | -0.70142 | -0.30423 | 0.05905  |
| 68 | C5 | PX  | 0.08772  | 0.25010  | 0.14531  | -0.17029 | 0.08149  |
| 69 | C5 | PY  | 0.39333  | -0.07417 | 0.17228  | 0.15922  | -0.13632 |
| 70 | C5 | PZ  | 0.00000  | 0.00000  | 0.00000  | 0.00000  | 0.00000  |
| 71 | C5 | S   | 0.30782  | 1.53529  | 2.47264  | -0.01419 | 0.96419  |
| 72 | C5 | PX  | -1.28314 | -1.02690 | -0.74840 | 0.11005  | -0.63324 |
| 73 | C5 | PY  | -1.69900 | 0.00968  | -0.15886 | -0.30626 | 0.40362  |
| 74 | C5 | PZ  | 0.00000  | 0.00000  | 0.00000  | 0.00000  | 0.00000  |
| 75 | C5 | DXX | -0.08350 | -0.01309 | -0.07596 | -0.03750 | 0.04544  |
| 76 | C5 | DYY | 0.02216  | 0.01425  | -0.03177 | -0.01234 | 0.00866  |
| 77 | C5 | DZZ | 0.01574  | -0.00742 | 0.00444  | -0.00675 | -0.05144 |
| 78 | C5 | DXY | 0.03588  | 0.08726  | 0.09820  | -0.01128 | 0.02265  |
| 79 | C5 | DXZ | 0.00000  | 0.00000  | 0.00000  | 0.00000  | 0.00000  |
| 80 | C5 | DYZ | 0.00000  | 0.00000  | 0.00000  | 0.00000  | 0.00000  |
| 81 | C6 | S   | -0.01131 | -0.01195 | 0.00271  | -0.01395 | -0.02923 |
| 82 | C6 | S   | -0.11480 | -0.59621 | 0.20704  | -0.18734 | -0.34913 |
| 83 | C6 | PX  | -0.26191 | 0.08022  | 0.12299  | 0.05287  | -0.03888 |
| 84 | C6 | PY  | 0.14445  | 0.08223  | 0.11042  | -0.34829 | -0.52072 |
| 85 | C6 | PZ  | 0.00000  | 0.00000  | 0.00000  | 0.00000  | 0.00000  |
| 86 | C6 | S   | 0.90232  | 0.77606  | -0.29715 | 0.06570  | 0.49993  |
| 87 | C6 | PX  | 1.66999  | -1.34615 | 0.42272  | -0.51427 | 0.91178  |
| 88 | C6 | PY  | -1.19651 | -0.26400 | -1.37201 | 2.21260  | 1.51123  |
| 89 | C6 | PZ  | 0.00000  | 0.00000  | 0.00000  | 0.00000  | 0.00000  |
| 90 | C6 | DXX | 0.08865  | -0.12690 | 0.01935  | 0.01684  | -0.03221 |
| 91 | C6 | DYY | -0.05800 | 0.03266  | 0.02509  | -0.10169 | -0.06317 |

|     |    |     |          |          |          |          |          |
|-----|----|-----|----------|----------|----------|----------|----------|
| 92  | C6 | DZZ | -0.00934 | 0.00975  | -0.00121 | 0.01960  | 0.01284  |
| 93  | C6 | DXY | 0.01740  | 0.01748  | 0.00033  | -0.10850 | -0.05043 |
| 94  | C6 | DXZ | 0.00000  | 0.00000  | 0.00000  | 0.00000  | 0.00000  |
| 95  | C6 | DYZ | 0.00000  | 0.00000  | 0.00000  | 0.00000  | 0.00000  |
| 96  | C7 | S   | 0.01781  | 0.01049  | 0.00780  | -0.01511 | 0.00797  |
| 97  | C7 | S   | -0.16064 | -0.21952 | 0.46560  | 0.00645  | 0.09638  |
| 98  | C7 | PX  | 0.13173  | 0.01317  | -0.23737 | 0.06710  | -0.11892 |
| 99  | C7 | PY  | -0.10337 | -0.08076 | 0.00901  | 0.22930  | 0.11754  |
| 100 | C7 | PZ  | 0.00000  | 0.00000  | 0.00000  | 0.00000  | 0.00000  |
| 101 | C7 | S   | -0.29567 | 0.04003  | -0.20298 | -0.07480 | 1.04069  |
| 102 | C7 | PX  | 0.24149  | 0.87128  | -0.21329 | -0.44117 | 0.11201  |
| 103 | C7 | PY  | -0.90890 | 0.54323  | -1.16364 | -1.70549 | 0.21837  |
| 104 | C7 | PZ  | 0.00000  | 0.00000  | 0.00000  | 0.00000  | 0.00000  |
| 105 | C7 | DXX | -0.04811 | -0.04501 | 0.10678  | -0.00598 | -0.02124 |
| 106 | C7 | DYY | 0.00944  | 0.04401  | -0.00731 | -0.02627 | 0.05857  |
| 107 | C7 | DZZ | -0.01769 | -0.01898 | -0.00852 | 0.01823  | -0.01690 |
| 108 | C7 | DXY | 0.03029  | 0.03877  | 0.06300  | 0.02121  | -0.03033 |
| 109 | C7 | DXZ | 0.00000  | 0.00000  | 0.00000  | 0.00000  | 0.00000  |
| 110 | C7 | DYZ | 0.00000  | 0.00000  | 0.00000  | 0.00000  | 0.00000  |
| 111 | H3 | S   | -0.02153 | -0.35358 | 0.35934  | 0.03713  | -0.19324 |
| 112 | H3 | S   | 0.14151  | -0.24210 | 0.38368  | -0.12784 | -0.35953 |
| 113 | H3 | PX  | -0.01774 | 0.02202  | 0.02805  | -0.00887 | 0.01961  |
| 114 | H3 | PY  | -0.00126 | -0.01223 | -0.00942 | 0.02440  | -0.00494 |
| 115 | H3 | PZ  | 0.00000  | 0.00000  | 0.00000  | 0.00000  | 0.00000  |
| 116 | H4 | S   | 0.18353  | -0.19809 | -0.33728 | -0.03815 | -0.30464 |
| 117 | H4 | S   | 0.40461  | -0.34485 | -0.30493 | 0.14481  | -0.41194 |
| 118 | H4 | PX  | 0.00331  | -0.02407 | 0.02287  | -0.00591 | -0.01451 |
| 119 | H4 | PY  | -0.01175 | 0.00270  | 0.00630  | -0.02448 | -0.01057 |
| 120 | H4 | PZ  | 0.00000  | 0.00000  | 0.00000  | 0.00000  | 0.00000  |
| 121 | N1 | S   | -0.00220 | -0.00896 | -0.00331 | 0.01448  | 0.01691  |
| 122 | N1 | S   | -0.21259 | 0.09644  | -0.32931 | 0.02551  | -0.05693 |
| 123 | N1 | PX  | -0.15482 | -0.04556 | -0.19598 | 0.14738  | 0.06348  |
| 124 | N1 | PY  | -0.07960 | 0.21213  | -0.04439 | -0.56504 | -0.20312 |
| 125 | N1 | PZ  | 0.00000  | 0.00000  | 0.00000  | 0.00000  | 0.00000  |
| 126 | N1 | S   | -0.18370 | 0.43118  | -0.37392 | -0.36359 | 0.02813  |
| 127 | N1 | PX  | 0.02983  | 0.65977  | 0.29038  | -0.60997 | -0.49118 |
| 128 | N1 | PY  | 0.16782  | -1.14489 | 0.24206  | 1.80582  | 1.35697  |
| 129 | N1 | PZ  | 0.00000  | 0.00000  | 0.00000  | 0.00000  | 0.00000  |
| 130 | N1 | DXX | -0.06661 | 0.06116  | -0.12914 | 0.00278  | -0.02666 |
| 131 | N1 | DYY | -0.05870 | -0.01632 | -0.05546 | 0.08035  | 0.03666  |
| 132 | N1 | DZZ | 0.01829  | 0.00402  | 0.01874  | -0.01576 | -0.00077 |
| 133 | N1 | DXY | -0.02600 | -0.06159 | -0.01238 | 0.02902  | 0.06025  |
| 134 | N1 | DXZ | 0.00000  | 0.00000  | 0.00000  | 0.00000  | 0.00000  |
| 135 | N1 | DYZ | 0.00000  | 0.00000  | 0.00000  | 0.00000  | 0.00000  |
| 136 | H6 | S   | 0.20989  | 0.15595  | 0.15235  | 0.33899  | 0.09566  |
| 137 | H6 | S   | 0.32292  | 0.30529  | -0.03528 | 0.32257  | 0.02483  |
| 138 | H6 | PX  | 0.00097  | 0.00663  | -0.02504 | 0.00758  | 0.00531  |
| 139 | H6 | PY  | 0.02640  | -0.01923 | -0.00505 | 0.03134  | -0.01595 |
| 140 | H6 | PZ  | 0.00000  | 0.00000  | 0.00000  | 0.00000  | 0.00000  |
| 141 | C8 | S   | 0.00231  | 0.01392  | 0.01506  | 0.02035  | -0.03931 |
| 142 | C8 | S   | -0.18717 | 0.61489  | 0.23334  | 0.50812  | -0.93291 |
| 143 | C8 | PX  | 0.12829  | -0.01745 | 0.13013  | 0.13961  | 0.01819  |
| 144 | C8 | PY  | 0.26971  | 0.10939  | -0.00452 | -0.35960 | 0.44445  |
| 145 | C8 | PZ  | 0.00000  | 0.00000  | 0.00000  | 0.00000  | 0.00000  |

|     |     |     |          |          |          |          |          |
|-----|-----|-----|----------|----------|----------|----------|----------|
| 146 | C8  | S   | 1.08124  | -1.70960 | -0.97578 | -2.61031 | 5.01961  |
| 147 | C8  | PX  | -0.38628 | 1.58371  | -1.64355 | -1.67094 | -1.11321 |
| 148 | C8  | PY  | -0.82178 | -0.76463 | -0.34514 | 3.58371  | -1.67611 |
| 149 | C8  | PZ  | 0.00000  | 0.00000  | 0.00000  | 0.00000  | 0.00000  |
| 150 | C8  | DXX | -0.04540 | 0.06596  | 0.04613  | 0.09253  | -0.03749 |
| 151 | C8  | DYY | 0.04923  | 0.00335  | -0.00123 | -0.03046 | 0.03081  |
| 152 | C8  | DZZ | -0.03020 | -0.00166 | -0.01707 | 0.01237  | -0.02865 |
| 153 | C8  | DXY | -0.00019 | 0.02652  | 0.06281  | -0.09352 | -0.02367 |
| 154 | C8  | DXZ | 0.00000  | 0.00000  | 0.00000  | 0.00000  | 0.00000  |
| 155 | C8  | DYZ | 0.00000  | 0.00000  | 0.00000  | 0.00000  | 0.00000  |
| 156 | H8  | S   | -0.45381 | -0.16295 | -0.02720 | 0.00512  | -0.04302 |
| 157 | H8  | S   | -0.05111 | -0.28127 | -0.05851 | -0.06090 | -0.13454 |
| 158 | H8  | PX  | -0.04372 | -0.00453 | 0.01627  | -0.00897 | 0.01128  |
| 159 | H8  | PY  | -0.00411 | 0.01594  | 0.00625  | -0.02494 | -0.01819 |
| 160 | H8  | PZ  | 0.00000  | 0.00000  | 0.00000  | 0.00000  | 0.00000  |
| 161 | C10 | S   | 0.00400  | -0.00729 | 0.00009  | -0.02719 | 0.02444  |
| 162 | C10 | S   | 0.60982  | -0.38589 | -0.09142 | -0.59623 | 0.96214  |
| 163 | C10 | PX  | 0.11875  | -0.01897 | 0.04527  | 0.12245  | 0.06046  |
| 164 | C10 | PY  | 0.26909  | -0.10203 | -0.02381 | -0.04487 | 0.18165  |
| 165 | C10 | PZ  | 0.00000  | 0.00000  | 0.00000  | 0.00000  | 0.00000  |
| 166 | C10 | S   | -1.77339 | 0.75961  | 0.12338  | 4.24857  | -4.34075 |
| 167 | C10 | PX  | -0.39742 | -0.78787 | 1.04415  | 0.02630  | 0.18280  |
| 168 | C10 | PY  | -0.85700 | 0.21952  | -0.13781 | 1.76899  | -1.60957 |
| 169 | C10 | PZ  | 0.00000  | 0.00000  | 0.00000  | 0.00000  | 0.00000  |
| 170 | C10 | DXX | 0.08486  | -0.02775 | 0.01331  | -0.13557 | 0.13646  |
| 171 | C10 | DYY | -0.02228 | 0.00075  | -0.00499 | 0.06026  | -0.10051 |
| 172 | C10 | DZZ | 0.01225  | -0.02774 | -0.02066 | 0.01375  | 0.05349  |
| 173 | C10 | DXY | -0.03093 | -0.07979 | 0.09428  | 0.01271  | 0.00941  |
| 174 | C10 | DXZ | 0.00000  | 0.00000  | 0.00000  | 0.00000  | 0.00000  |
| 175 | C10 | DYZ | 0.00000  | 0.00000  | 0.00000  | 0.00000  | 0.00000  |
| 176 | H16 | S   | 0.12906  | 0.16168  | -0.32658 | -0.00299 | 0.05007  |
| 177 | H16 | S   | 0.10385  | 0.02986  | -0.31721 | 0.00135  | 0.19028  |
| 178 | H16 | PX  | -0.01155 | 0.00665  | -0.00145 | -0.02060 | -0.01462 |
| 179 | H16 | PY  | 0.00178  | -0.02161 | 0.04309  | -0.03947 | 0.02355  |
| 180 | H16 | PZ  | 0.00000  | 0.00000  | 0.00000  | 0.00000  | 0.00000  |
| 181 | H18 | S   | -0.04625 | -0.24915 | 0.30252  | -0.18571 | 0.17691  |
| 182 | H18 | S   | -0.10693 | -0.30206 | 0.14054  | -0.06206 | 0.27466  |
| 183 | H18 | PX  | -0.01338 | 0.00056  | -0.01028 | -0.02758 | -0.00115 |
| 184 | H18 | PY  | 0.02227  | 0.02082  | -0.03963 | -0.00168 | 0.01812  |
| 185 | H18 | PZ  | 0.00000  | 0.00000  | 0.00000  | 0.00000  | 0.00000  |

|              |          |          |          |          |          |
|--------------|----------|----------|----------|----------|----------|
| MO:          | 96       | 97       | 98       | 99       | 100      |
| Eigenvalues: | 1.46880  | 1.47855  | 1.48237  | 1.57062  | 1.58697  |
| (ev):        | 39.96810 | 40.23338 | 40.33727 | 42.73883 | 43.18366 |

|   |    |    |          |         |          |         |         |
|---|----|----|----------|---------|----------|---------|---------|
|   |    | A  | A        | A       | A        | A       |         |
| 1 | H1 | S  | 0.35209  | 0.00000 | 0.23318  | 0.00000 | 0.00000 |
| 2 | H1 | S  | 0.35735  | 0.00000 | 0.30278  | 0.00000 | 0.00000 |
| 3 | H1 | PX | 0.02038  | 0.00000 | -0.00957 | 0.00000 | 0.00000 |
| 4 | H1 | PY | -0.00626 | 0.00000 | -0.00076 | 0.00000 | 0.00000 |
| 5 | H1 | PZ | 0.00000  | 0.04687 | 0.00000  | 0.08627 | 0.13416 |
| 6 | C1 | S  | 0.02858  | 0.00000 | 0.02352  | 0.00000 | 0.00000 |
| 7 | C1 | S  | 0.83761  | 0.00000 | 0.11966  | 0.00000 | 0.00000 |
| 8 | C1 | PX | -0.20786 | 0.00000 | 0.15425  | 0.00000 | 0.00000 |



|    |    |     |          |          |          |          |          |
|----|----|-----|----------|----------|----------|----------|----------|
| 9  | C1 | PY  | 0.11396  | 0.00000  | -0.03319 | 0.00000  | 0.00000  |
| 10 | C1 | PZ  | 0.00000  | -0.00086 | 0.00000  | 0.05904  | 0.10554  |
| 11 | C1 | S   | -2.56910 | 0.00000  | -2.10165 | 0.00000  | 0.00000  |
| 12 | C1 | PX  | -0.33384 | 0.00000  | -0.54411 | 0.00000  | 0.00000  |
| 13 | C1 | PY  | 0.02333  | 0.00000  | 1.67934  | 0.00000  | 0.00000  |
| 14 | C1 | PZ  | 0.00000  | 0.02684  | 0.00000  | -0.04023 | -0.07801 |
| 15 | C1 | DXX | 0.13022  | 0.00000  | 0.10175  | 0.00000  | 0.00000  |
| 16 | C1 | DYY | -0.01550 | 0.00000  | -0.06327 | 0.00000  | 0.00000  |
| 17 | C1 | DZZ | -0.02005 | 0.00000  | -0.03850 | 0.00000  | 0.00000  |
| 18 | C1 | DXY | -0.00044 | 0.00000  | -0.00892 | 0.00000  | 0.00000  |
| 19 | C1 | DXZ | 0.00000  | 0.10179  | 0.00000  | 0.20242  | 0.31469  |
| 20 | C1 | DYZ | 0.00000  | 0.28078  | 0.00000  | -0.16259 | 0.12329  |
| 21 | C2 | S   | -0.00312 | 0.00000  | -0.01794 | 0.00000  | 0.00000  |
| 22 | C2 | S   | -0.26941 | 0.00000  | -0.27514 | 0.00000  | 0.00000  |
| 23 | C2 | PX  | -0.17505 | 0.00000  | 0.13011  | 0.00000  | 0.00000  |
| 24 | C2 | PY  | -0.11624 | 0.00000  | 0.04906  | 0.00000  | 0.00000  |
| 25 | C2 | PZ  | 0.00000  | -0.01510 | 0.00000  | 0.08056  | -0.02043 |
| 26 | C2 | S   | -0.50902 | 0.00000  | 2.14573  | 0.00000  | 0.00000  |
| 27 | C2 | PX  | -0.77960 | 0.00000  | -1.28472 | 0.00000  | 0.00000  |
| 28 | C2 | PY  | 0.82483  | 0.00000  | -1.95828 | 0.00000  | 0.00000  |
| 29 | C2 | PZ  | 0.00000  | 0.04217  | 0.00000  | -0.02004 | -0.04447 |
| 30 | C2 | DXX | -0.05654 | 0.00000  | -0.13208 | 0.00000  | 0.00000  |
| 31 | C2 | DYY | -0.00653 | 0.00000  | 0.09923  | 0.00000  | 0.00000  |
| 32 | C2 | DZZ | 0.01135  | 0.00000  | -0.01296 | 0.00000  | 0.00000  |
| 33 | C2 | DXY | 0.03686  | 0.00000  | 0.01120  | 0.00000  | 0.00000  |
| 34 | C2 | DXZ | 0.00000  | -0.10342 | 0.00000  | -0.25299 | 0.04389  |
| 35 | C2 | DYZ | 0.00000  | 0.25735  | 0.00000  | -0.13521 | -0.13824 |
| 36 | C3 | S   | -0.02373 | 0.00000  | 0.01995  | 0.00000  | 0.00000  |
| 37 | C3 | S   | -0.70914 | 0.00000  | 0.00682  | 0.00000  | 0.00000  |
| 38 | C3 | PX  | -0.24486 | 0.00000  | -0.14085 | 0.00000  | 0.00000  |
| 39 | C3 | PY  | -0.06796 | 0.00000  | -0.31938 | 0.00000  | 0.00000  |
| 40 | C3 | PZ  | 0.00000  | -0.02475 | 0.00000  | -0.04917 | -0.05419 |
| 41 | C3 | S   | 2.74285  | 0.00000  | 0.27212  | 0.00000  | 0.00000  |
| 42 | C3 | PX  | 1.81043  | 0.00000  | 3.79255  | 0.00000  | 0.00000  |
| 43 | C3 | PY  | -0.90454 | 0.00000  | 1.09394  | 0.00000  | 0.00000  |
| 44 | C3 | PZ  | 0.00000  | -0.02445 | 0.00000  | 0.12206  | 0.00673  |
| 45 | C3 | DXX | -0.01649 | 0.00000  | -0.04923 | 0.00000  | 0.00000  |
| 46 | C3 | DYY | -0.01161 | 0.00000  | 0.09565  | 0.00000  | 0.00000  |
| 47 | C3 | DZZ | -0.01584 | 0.00000  | -0.06522 | 0.00000  | 0.00000  |
| 48 | C3 | DXY | 0.00806  | 0.00000  | -0.04340 | 0.00000  | 0.00000  |
| 49 | C3 | DXZ | 0.00000  | -0.24107 | 0.00000  | 0.17967  | 0.13608  |
| 50 | C3 | DYZ | 0.00000  | -0.25201 | 0.00000  | -0.09060 | -0.32590 |
| 51 | C4 | S   | -0.01305 | 0.00000  | -0.00744 | 0.00000  | 0.00000  |
| 52 | C4 | S   | -0.48679 | 0.00000  | -0.22960 | 0.00000  | 0.00000  |
| 53 | C4 | PX  | -0.10235 | 0.00000  | 0.07744  | 0.00000  | 0.00000  |
| 54 | C4 | PY  | 0.09991  | 0.00000  | -0.01972 | 0.00000  | 0.00000  |
| 55 | C4 | PZ  | 0.00000  | -0.02140 | 0.00000  | 0.04130  | 0.02045  |
| 56 | C4 | S   | 1.15906  | 0.00000  | 0.34801  | 0.00000  | 0.00000  |
| 57 | C4 | PX  | 0.91413  | 0.00000  | -0.64028 | 0.00000  | 0.00000  |
| 58 | C4 | PY  | 0.56774  | 0.00000  | 0.03957  | 0.00000  | 0.00000  |
| 59 | C4 | PZ  | 0.00000  | 0.01092  | 0.00000  | -0.00419 | -0.02130 |
| 60 | C4 | DXX | -0.04617 | 0.00000  | 0.03550  | 0.00000  | 0.00000  |
| 61 | C4 | DYY | -0.01891 | 0.00000  | -0.00475 | 0.00000  | 0.00000  |
| 62 | C4 | DZZ | -0.01320 | 0.00000  | -0.04808 | 0.00000  | 0.00000  |

|     |    |     |          |          |          |          |          |
|-----|----|-----|----------|----------|----------|----------|----------|
| 63  | C4 | DXY | -0.08643 | 0.00000  | 0.03964  | 0.00000  | 0.00000  |
| 64  | C4 | DXZ | 0.00000  | 0.26205  | 0.00000  | -0.11781 | 0.08316  |
| 65  | C4 | DYZ | 0.00000  | -0.02566 | 0.00000  | 0.23723  | 0.16087  |
| 66  | C5 | S   | 0.00752  | 0.00000  | 0.01711  | 0.00000  | 0.00000  |
| 67  | C5 | S   | 0.26518  | 0.00000  | 0.50402  | 0.00000  | 0.00000  |
| 68  | C5 | PX  | -0.08230 | 0.00000  | 0.08124  | 0.00000  | 0.00000  |
| 69  | C5 | PY  | -0.03450 | 0.00000  | -0.21202 | 0.00000  | 0.00000  |
| 70  | C5 | PZ  | 0.00000  | -0.01841 | 0.00000  | 0.03776  | 0.02920  |
| 71  | C5 | S   | -0.51248 | 0.00000  | -0.16967 | 0.00000  | 0.00000  |
| 72  | C5 | PX  | 0.90215  | 0.00000  | -0.82078 | 0.00000  | 0.00000  |
| 73  | C5 | PY  | -0.80435 | 0.00000  | 0.36843  | 0.00000  | 0.00000  |
| 74  | C5 | PZ  | 0.00000  | 0.00622  | 0.00000  | -0.01744 | 0.02584  |
| 75  | C5 | DXX | 0.00715  | 0.00000  | 0.04775  | 0.00000  | 0.00000  |
| 76  | C5 | DYY | 0.05002  | 0.00000  | 0.03697  | 0.00000  | 0.00000  |
| 77  | C5 | DZZ | -0.01279 | 0.00000  | -0.03464 | 0.00000  | 0.00000  |
| 78  | C5 | DXY | -0.05132 | 0.00000  | 0.02029  | 0.00000  | 0.00000  |
| 79  | C5 | DXZ | 0.00000  | -0.25596 | 0.00000  | 0.08227  | -0.01447 |
| 80  | C5 | DYZ | 0.00000  | -0.04628 | 0.00000  | 0.25346  | 0.12361  |
| 81  | C6 | S   | 0.00336  | 0.00000  | -0.00846 | 0.00000  | 0.00000  |
| 82  | C6 | S   | 0.25616  | 0.00000  | 0.00842  | 0.00000  | 0.00000  |
| 83  | C6 | PX  | 0.10424  | 0.00000  | -0.46359 | 0.00000  | 0.00000  |
| 84  | C6 | PY  | -0.06757 | 0.00000  | -0.02901 | 0.00000  | 0.00000  |
| 85  | C6 | PZ  | 0.00000  | -0.00656 | 0.00000  | -0.02943 | -0.04813 |
| 86  | C6 | S   | -0.42322 | 0.00000  | 0.24520  | 0.00000  | 0.00000  |
| 87  | C6 | PX  | 0.15126  | 0.00000  | 4.68138  | 0.00000  | 0.00000  |
| 88  | C6 | PY  | 2.23739  | 0.00000  | 0.36925  | 0.00000  | 0.00000  |
| 89  | C6 | PZ  | 0.00000  | -0.02832 | 0.00000  | -0.01305 | 0.22659  |
| 90  | C6 | DXX | 0.05100  | 0.00000  | 0.02919  | 0.00000  | 0.00000  |
| 91  | C6 | DYY | -0.02527 | 0.00000  | -0.08077 | 0.00000  | 0.00000  |
| 92  | C6 | DZZ | -0.01269 | 0.00000  | 0.01819  | 0.00000  | 0.00000  |
| 93  | C6 | DXY | -0.00342 | 0.00000  | -0.06839 | 0.00000  | 0.00000  |
| 94  | C6 | DXZ | 0.00000  | 0.26754  | 0.00000  | -0.21345 | -0.09119 |
| 95  | C6 | DYZ | 0.00000  | -0.20465 | 0.00000  | -0.16717 | 0.08240  |
| 96  | C7 | S   | -0.00372 | 0.00000  | 0.03741  | 0.00000  | 0.00000  |
| 97  | C7 | S   | 0.03504  | 0.00000  | 0.61443  | 0.00000  | 0.00000  |
| 98  | C7 | PX  | -0.02993 | 0.00000  | -0.08502 | 0.00000  | 0.00000  |
| 99  | C7 | PY  | -0.18598 | 0.00000  | 0.08666  | 0.00000  | 0.00000  |
| 100 | C7 | PZ  | 0.00000  | -0.09141 | 0.00000  | -0.05841 | -0.04640 |
| 101 | C7 | S   | 0.00293  | 0.00000  | -2.79485 | 0.00000  | 0.00000  |
| 102 | C7 | PX  | -1.20302 | 0.00000  | 1.74568  | 0.00000  | 0.00000  |
| 103 | C7 | PY  | -1.77834 | 0.00000  | -2.05526 | 0.00000  | 0.00000  |
| 104 | C7 | PZ  | 0.00000  | 0.11677  | 0.00000  | -0.07420 | -0.00298 |
| 105 | C7 | DXX | 0.06880  | 0.00000  | -0.03590 | 0.00000  | 0.00000  |
| 106 | C7 | DYY | -0.05533 | 0.00000  | 0.10270  | 0.00000  | 0.00000  |
| 107 | C7 | DZZ | 0.00568  | 0.00000  | -0.04428 | 0.00000  | 0.00000  |
| 108 | C7 | DXY | 0.03810  | 0.00000  | 0.01162  | 0.00000  | 0.00000  |
| 109 | C7 | DXZ | 0.00000  | -0.20173 | 0.00000  | -0.28350 | 0.12062  |
| 110 | C7 | DYZ | 0.00000  | 0.07140  | 0.00000  | 0.03346  | 0.36828  |
| 111 | H3 | S   | -0.42691 | 0.00000  | -0.01238 | 0.00000  | 0.00000  |
| 112 | H3 | S   | -0.49435 | 0.00000  | -0.06675 | 0.00000  | 0.00000  |
| 113 | H3 | PX  | -0.01519 | 0.00000  | 0.01670  | 0.00000  | 0.00000  |
| 114 | H3 | PY  | -0.01343 | 0.00000  | -0.00601 | 0.00000  | 0.00000  |
| 115 | H3 | PZ  | 0.00000  | 0.02945  | 0.00000  | 0.07090  | 0.06825  |
| 116 | H4 | S   | 0.39287  | 0.00000  | -0.09257 | 0.00000  | 0.00000  |

|     |     |     |          |          |          |          |          |
|-----|-----|-----|----------|----------|----------|----------|----------|
| 117 | H4  | S   | 0.46767  | 0.00000  | -0.24050 | 0.00000  | 0.00000  |
| 118 | H4  | PX  | -0.02004 | 0.00000  | 0.00794  | 0.00000  | 0.00000  |
| 119 | H4  | PY  | 0.00576  | 0.00000  | 0.01490  | 0.00000  | 0.00000  |
| 120 | H4  | PZ  | 0.00000  | 0.02986  | 0.00000  | 0.07325  | 0.06004  |
| 121 | N1  | S   | -0.00358 | 0.00000  | -0.00023 | 0.00000  | 0.00000  |
| 122 | N1  | S   | -0.14004 | 0.00000  | 0.02303  | 0.00000  | 0.00000  |
| 123 | N1  | PX  | 0.07524  | 0.00000  | -0.15027 | 0.00000  | 0.00000  |
| 124 | N1  | PY  | 0.03745  | 0.00000  | -0.13100 | 0.00000  | 0.00000  |
| 125 | N1  | PZ  | 0.00000  | -0.08370 | 0.00000  | -0.03790 | 0.11746  |
| 126 | N1  | S   | 0.19625  | 0.00000  | -0.30537 | 0.00000  | 0.00000  |
| 127 | N1  | PX  | -0.20929 | 0.00000  | -1.16943 | 0.00000  | 0.00000  |
| 128 | N1  | PY  | 1.40402  | 0.00000  | 1.39159  | 0.00000  | 0.00000  |
| 129 | N1  | PZ  | 0.00000  | 0.08964  | 0.00000  | -0.03504 | -0.28934 |
| 130 | N1  | DXX | -0.08345 | 0.00000  | -0.00689 | 0.00000  | 0.00000  |
| 131 | N1  | DYY | 0.00184  | 0.00000  | 0.02265  | 0.00000  | 0.00000  |
| 132 | N1  | DZZ | -0.00168 | 0.00000  | 0.01057  | 0.00000  | 0.00000  |
| 133 | N1  | DXY | 0.04268  | 0.00000  | 0.06570  | 0.00000  | 0.00000  |
| 134 | N1  | DXZ | 0.00000  | 0.14574  | 0.00000  | 0.01123  | 0.04183  |
| 135 | N1  | DYZ | 0.00000  | 0.00931  | 0.00000  | 0.20030  | -0.10882 |
| 136 | H6  | S   | -0.23095 | 0.00000  | -0.44504 | 0.00000  | 0.00000  |
| 137 | H6  | S   | -0.17698 | 0.00000  | -0.70455 | 0.00000  | 0.00000  |
| 138 | H6  | PX  | 0.02866  | 0.00000  | 0.00152  | 0.00000  | 0.00000  |
| 139 | H6  | PY  | 0.01429  | 0.00000  | -0.01798 | 0.00000  | 0.00000  |
| 140 | H6  | PZ  | 0.00000  | 0.03852  | 0.00000  | 0.11335  | -0.02391 |
| 141 | C8  | S   | 0.00335  | 0.00000  | 0.00297  | 0.00000  | 0.00000  |
| 142 | C8  | S   | 0.02437  | 0.00000  | 0.15914  | 0.00000  | 0.00000  |
| 143 | C8  | PX  | 0.33581  | 0.00000  | -0.06204 | 0.00000  | 0.00000  |
| 144 | C8  | PY  | -0.00788 | 0.00000  | -0.40484 | 0.00000  | 0.00000  |
| 145 | C8  | PZ  | 0.00000  | 0.09873  | 0.00000  | 0.01253  | -0.02662 |
| 146 | C8  | S   | -0.30531 | 0.00000  | -0.68199 | 0.00000  | 0.00000  |
| 147 | C8  | PX  | -3.57722 | 0.00000  | -0.48597 | 0.00000  | 0.00000  |
| 148 | C8  | PY  | 0.21873  | 0.00000  | 5.04708  | 0.00000  | 0.00000  |
| 149 | C8  | PZ  | 0.00000  | -0.24358 | 0.00000  | 0.05252  | 0.10779  |
| 150 | C8  | DXX | 0.00931  | 0.00000  | 0.00429  | 0.00000  | 0.00000  |
| 151 | C8  | DYY | 0.01051  | 0.00000  | -0.00100 | 0.00000  | 0.00000  |
| 152 | C8  | DZZ | -0.00341 | 0.00000  | 0.01512  | 0.00000  | 0.00000  |
| 153 | C8  | DXY | -0.00802 | 0.00000  | -0.00142 | 0.00000  | 0.00000  |
| 154 | C8  | DXZ | 0.00000  | 0.00858  | 0.00000  | 0.23838  | -0.31908 |
| 155 | C8  | DYZ | 0.00000  | 0.20601  | 0.00000  | 0.15923  | -0.15634 |
| 156 | H8  | S   | 0.14954  | 0.00000  | -0.43854 | 0.00000  | 0.00000  |
| 157 | H8  | S   | 0.19932  | 0.00000  | -0.59414 | 0.00000  | 0.00000  |
| 158 | H8  | PX  | -0.00306 | 0.00000  | -0.05076 | 0.00000  | 0.00000  |
| 159 | H8  | PY  | -0.02030 | 0.00000  | -0.02237 | 0.00000  | 0.00000  |
| 160 | H8  | PZ  | 0.00000  | -0.06973 | 0.00000  | -0.14697 | -0.01716 |
| 161 | C10 | S   | 0.00261  | 0.00000  | -0.02273 | 0.00000  | 0.00000  |
| 162 | C10 | S   | 0.06467  | 0.00000  | -0.36424 | 0.00000  | 0.00000  |
| 163 | C10 | PX  | -0.02956 | 0.00000  | 0.16886  | 0.00000  | 0.00000  |
| 164 | C10 | PY  | 0.04756  | 0.00000  | 0.09353  | 0.00000  | 0.00000  |
| 165 | C10 | PZ  | 0.00000  | 0.04396  | 0.00000  | 0.03654  | -0.07658 |
| 166 | C10 | S   | -0.03913 | 0.00000  | 4.51643  | 0.00000  | 0.00000  |
| 167 | C10 | PX  | 2.03054  | 0.00000  | -0.29469 | 0.00000  | 0.00000  |
| 168 | C10 | PY  | -0.24883 | 0.00000  | 1.74596  | 0.00000  | 0.00000  |
| 169 | C10 | PZ  | 0.00000  | 0.07836  | 0.00000  | -0.01761 | 0.02753  |
| 170 | C10 | DXX | 0.02321  | 0.00000  | -0.12451 | 0.00000  | 0.00000  |

|     |     |     |          |          |          |          |          |
|-----|-----|-----|----------|----------|----------|----------|----------|
| 171 | C10 | DYY | -0.01209 | 0.00000  | 0.08516  | 0.00000  | 0.00000  |
| 172 | C10 | DZZ | -0.00545 | 0.00000  | 0.00617  | 0.00000  | 0.00000  |
| 173 | C10 | DXY | 0.14377  | 0.00000  | -0.01235 | 0.00000  | 0.00000  |
| 174 | C10 | DXZ | 0.00000  | -0.00871 | 0.00000  | 0.13069  | -0.16458 |
| 175 | C10 | DYZ | 0.00000  | -0.15089 | 0.00000  | -0.12950 | 0.17589  |
| 176 | H16 | S   | -0.39299 | 0.00000  | 0.00913  | 0.00000  | 0.00000  |
| 177 | H16 | S   | -0.62793 | 0.00000  | 0.08507  | 0.00000  | 0.00000  |
| 178 | H16 | PX  | 0.00307  | 0.00000  | -0.02055 | 0.00000  | 0.00000  |
| 179 | H16 | PY  | 0.04130  | 0.00000  | -0.03147 | 0.00000  | 0.00000  |
| 180 | H16 | PZ  | 0.00000  | 0.04569  | 0.00000  | 0.08034  | -0.10348 |
| 181 | H18 | S   | 0.41741  | 0.00000  | -0.09664 | 0.00000  | 0.00000  |
| 182 | H18 | S   | 0.51922  | 0.00000  | -0.24699 | 0.00000  | 0.00000  |
| 183 | H18 | PX  | -0.00320 | 0.00000  | -0.02819 | 0.00000  | 0.00000  |
| 184 | H18 | PY  | -0.04204 | 0.00000  | -0.02539 | 0.00000  | 0.00000  |
| 185 | H18 | PZ  | 0.00000  | 0.04294  | 0.00000  | -0.01564 | 0.01945  |

|              |          |          |          |          |          |
|--------------|----------|----------|----------|----------|----------|
| MO:          | 101      | 102      | 103      | 104      | 105      |
| Eigenvalues: | 1.60573  | 1.61528  | 1.62909  | 1.64045  | 1.67320  |
| (ev):        | 43.69417 | 43.95390 | 44.32986 | 44.63889 | 45.53021 |

|    |    | A   | A        | A        | A        | A        |          |
|----|----|-----|----------|----------|----------|----------|----------|
| 1  | H1 | S   | 0.23470  | 0.00000  | 0.05320  | 0.00000  | 0.64365  |
| 2  | H1 | S   | 0.43635  | 0.00000  | -0.06868 | 0.00000  | 1.09696  |
| 3  | H1 | PX  | 0.01240  | 0.00000  | -0.02394 | 0.00000  | 0.03991  |
| 4  | H1 | PY  | 0.01161  | 0.00000  | 0.03883  | 0.00000  | -0.00900 |
| 5  | H1 | PZ  | 0.00000  | 0.06181  | 0.00000  | -0.02292 | 0.00000  |
| 6  | C1 | S   | -0.00321 | 0.00000  | 0.04221  | 0.00000  | -0.02074 |
| 7  | C1 | S   | -0.06720 | 0.00000  | 0.56814  | 0.00000  | -0.60185 |
| 8  | C1 | PX  | 0.02954  | 0.00000  | -0.01459 | 0.00000  | 0.26696  |
| 9  | C1 | PY  | 0.00961  | 0.00000  | 0.09405  | 0.00000  | 0.12267  |
| 10 | C1 | PZ  | 0.00000  | 0.03294  | 0.00000  | 0.00550  | 0.00000  |
| 11 | C1 | S   | 1.30979  | 0.00000  | -4.60293 | 0.00000  | 1.50755  |
| 12 | C1 | PX  | -1.47670 | 0.00000  | 1.06435  | 0.00000  | -3.36563 |
| 13 | C1 | PY  | 0.37033  | 0.00000  | 2.44930  | 0.00000  | 0.39395  |
| 14 | C1 | PZ  | 0.00000  | 0.07764  | 0.00000  | -0.04001 | 0.00000  |
| 15 | C1 | DXX | 0.03508  | 0.00000  | 0.09068  | 0.00000  | 0.06796  |
| 16 | C1 | DYY | -0.02836 | 0.00000  | -0.01168 | 0.00000  | -0.10330 |
| 17 | C1 | DZZ | 0.01968  | 0.00000  | -0.06557 | 0.00000  | 0.02037  |
| 18 | C1 | DXY | 0.03328  | 0.00000  | -0.02864 | 0.00000  | -0.03828 |
| 19 | C1 | DXZ | 0.00000  | 0.08318  | 0.00000  | -0.04438 | 0.00000  |
| 20 | C1 | DYZ | 0.00000  | -0.05265 | 0.00000  | 0.15297  | 0.00000  |
| 21 | C2 | S   | -0.03955 | 0.00000  | 0.03774  | 0.00000  | -0.02240 |
| 22 | C2 | S   | -0.39828 | 0.00000  | 0.68530  | 0.00000  | -0.58081 |
| 23 | C2 | PX  | 0.02904  | 0.00000  | 0.15409  | 0.00000  | -0.22243 |
| 24 | C2 | PY  | -0.25256 | 0.00000  | 0.11771  | 0.00000  | 0.03574  |
| 25 | C2 | PZ  | 0.00000  | -0.03971 | 0.00000  | -0.06354 | 0.00000  |
| 26 | C2 | S   | 3.96853  | 0.00000  | -3.59111 | 0.00000  | 1.89652  |
| 27 | C2 | PX  | 1.13775  | 0.00000  | -2.34958 | 0.00000  | 3.08026  |
| 28 | C2 | PY  | -1.09815 | 0.00000  | 0.29035  | 0.00000  | 0.09477  |
| 29 | C2 | PZ  | 0.00000  | 0.13075  | 0.00000  | 0.07116  | 0.00000  |
| 30 | C2 | DXX | -0.05529 | 0.00000  | -0.00505 | 0.00000  | 0.04023  |
| 31 | C2 | DYY | 0.01490  | 0.00000  | 0.02005  | 0.00000  | -0.09318 |
| 32 | C2 | DZZ | 0.06170  | 0.00000  | -0.02452 | 0.00000  | 0.03575  |
| 33 | C2 | DXY | -0.07482 | 0.00000  | 0.02012  | 0.00000  | 0.01844  |

|    |    |     |          |          |          |          |          |
|----|----|-----|----------|----------|----------|----------|----------|
| 34 | C2 | DXZ | 0.00000  | 0.11161  | 0.00000  | 0.22930  | 0.00000  |
| 35 | C2 | DYZ | 0.00000  | -0.15221 | 0.00000  | 0.01240  | 0.00000  |
| 36 | C3 | S   | -0.02363 | 0.00000  | 0.00302  | 0.00000  | 0.01699  |
| 37 | C3 | S   | -0.66667 | 0.00000  | -0.35574 | 0.00000  | 0.22284  |
| 38 | C3 | PX  | -0.10405 | 0.00000  | -0.43006 | 0.00000  | -0.40360 |
| 39 | C3 | PY  | 0.34631  | 0.00000  | -0.06764 | 0.00000  | -0.14553 |
| 40 | C3 | PZ  | 0.00000  | 0.06151  | 0.00000  | -0.00847 | 0.00000  |
| 41 | C3 | S   | 1.20682  | 0.00000  | 1.25758  | 0.00000  | -1.32959 |
| 42 | C3 | PX  | 1.00935  | 0.00000  | 4.09456  | 0.00000  | 1.70346  |
| 43 | C3 | PY  | -1.99571 | 0.00000  | 3.27783  | 0.00000  | 0.54717  |
| 44 | C3 | PZ  | 0.00000  | -0.20145 | 0.00000  | 0.04106  | 0.00000  |
| 45 | C3 | DXX | -0.12205 | 0.00000  | 0.03196  | 0.00000  | 0.07715  |
| 46 | C3 | DYY | 0.01818  | 0.00000  | 0.03822  | 0.00000  | -0.05557 |
| 47 | C3 | DZZ | 0.03394  | 0.00000  | -0.09836 | 0.00000  | 0.00415  |
| 48 | C3 | DXY | -0.03233 | 0.00000  | -0.01399 | 0.00000  | -0.03982 |
| 49 | C3 | DXZ | 0.00000  | -0.06615 | 0.00000  | 0.14317  | 0.00000  |
| 50 | C3 | DYZ | 0.00000  | -0.02239 | 0.00000  | -0.28288 | 0.00000  |
| 51 | C4 | S   | -0.00132 | 0.00000  | -0.00856 | 0.00000  | 0.01375  |
| 52 | C4 | S   | 0.06266  | 0.00000  | -0.41206 | 0.00000  | 0.35643  |
| 53 | C4 | PX  | -0.04035 | 0.00000  | 0.17537  | 0.00000  | -0.24352 |
| 54 | C4 | PY  | 0.00240  | 0.00000  | 0.13305  | 0.00000  | -0.05123 |
| 55 | C4 | PZ  | 0.00000  | -0.01856 | 0.00000  | -0.08921 | 0.00000  |
| 56 | C4 | S   | -1.06085 | 0.00000  | 0.21046  | 0.00000  | -1.81053 |
| 57 | C4 | PX  | -0.03521 | 0.00000  | -0.89652 | 0.00000  | 0.81995  |
| 58 | C4 | PY  | 0.95012  | 0.00000  | -0.75453 | 0.00000  | 1.99137  |
| 59 | C4 | PZ  | 0.00000  | -0.02418 | 0.00000  | 0.06265  | 0.00000  |
| 60 | C4 | DXX | -0.00841 | 0.00000  | -0.08338 | 0.00000  | 0.07306  |
| 61 | C4 | DYY | -0.05312 | 0.00000  | 0.05946  | 0.00000  | -0.07764 |
| 62 | C4 | DZZ | 0.06484  | 0.00000  | -0.03161 | 0.00000  | 0.02548  |
| 63 | C4 | DXY | 0.00738  | 0.00000  | -0.01505 | 0.00000  | 0.00204  |
| 64 | C4 | DXZ | 0.00000  | -0.26325 | 0.00000  | -0.10994 | 0.00000  |
| 65 | C4 | DYZ | 0.00000  | -0.04471 | 0.00000  | -0.30412 | 0.00000  |
| 66 | C5 | S   | -0.00129 | 0.00000  | -0.01284 | 0.00000  | 0.00479  |
| 67 | C5 | S   | 0.07479  | 0.00000  | -0.29164 | 0.00000  | 0.23483  |
| 68 | C5 | PX  | 0.01428  | 0.00000  | -0.09271 | 0.00000  | 0.28473  |
| 69 | C5 | PY  | 0.09426  | 0.00000  | 0.01119  | 0.00000  | 0.01024  |
| 70 | C5 | PZ  | 0.00000  | -0.01748 | 0.00000  | -0.08131 | 0.00000  |
| 71 | C5 | S   | -0.66601 | 0.00000  | 1.37744  | 0.00000  | -0.98912 |
| 72 | C5 | PX  | 0.20175  | 0.00000  | 0.26432  | 0.00000  | -0.78882 |
| 73 | C5 | PY  | -0.49973 | 0.00000  | -1.20466 | 0.00000  | 0.99533  |
| 74 | C5 | PZ  | 0.00000  | -0.02070 | 0.00000  | 0.05941  | 0.00000  |
| 75 | C5 | DXX | -0.01134 | 0.00000  | -0.07592 | 0.00000  | 0.07414  |
| 76 | C5 | DYY | -0.05646 | 0.00000  | 0.08550  | 0.00000  | -0.07159 |
| 77 | C5 | DZZ | 0.08503  | 0.00000  | -0.04297 | 0.00000  | 0.02465  |
| 78 | C5 | DXY | -0.04963 | 0.00000  | 0.03577  | 0.00000  | 0.00121  |
| 79 | C5 | DXZ | 0.00000  | 0.30798  | 0.00000  | 0.18005  | 0.00000  |
| 80 | C5 | DYZ | 0.00000  | -0.06338 | 0.00000  | -0.30973 | 0.00000  |
| 81 | C6 | S   | -0.01564 | 0.00000  | -0.02094 | 0.00000  | 0.02038  |
| 82 | C6 | S   | 0.16709  | 0.00000  | -0.36215 | 0.00000  | 0.41215  |
| 83 | C6 | PX  | -0.19417 | 0.00000  | 0.14815  | 0.00000  | 0.28917  |
| 84 | C6 | PY  | 0.39410  | 0.00000  | -0.06301 | 0.00000  | -0.04230 |
| 85 | C6 | PZ  | 0.00000  | 0.07717  | 0.00000  | 0.04945  | 0.00000  |
| 86 | C6 | S   | -1.80798 | 0.00000  | 5.99370  | 0.00000  | -0.13841 |
| 87 | C6 | PX  | 2.92039  | 0.00000  | -0.16674 | 0.00000  | -1.09720 |

|     |    |     |          |          |          |          |          |
|-----|----|-----|----------|----------|----------|----------|----------|
| 88  | C6 | PY  | -3.31005 | 0.00000  | 0.33309  | 0.00000  | -1.67574 |
| 89  | C6 | PZ  | 0.00000  | -0.12498 | 0.00000  | -0.18171 | 0.00000  |
| 90  | C6 | DXX | -0.05657 | 0.00000  | 0.06072  | 0.00000  | 0.08067  |
| 91  | C6 | DYY | -0.04720 | 0.00000  | 0.07254  | 0.00000  | -0.00808 |
| 92  | C6 | DZZ | 0.09747  | 0.00000  | -0.08619 | 0.00000  | -0.00100 |
| 93  | C6 | DXY | -0.06010 | 0.00000  | 0.01974  | 0.00000  | 0.04359  |
| 94  | C6 | DXZ | 0.00000  | 0.10668  | 0.00000  | -0.18580 | 0.00000  |
| 95  | C6 | DYZ | 0.00000  | 0.16496  | 0.00000  | -0.03529 | 0.00000  |
| 96  | C7 | S   | 0.04381  | 0.00000  | 0.01866  | 0.00000  | -0.00284 |
| 97  | C7 | S   | 0.83474  | 0.00000  | 0.11226  | 0.00000  | -0.19352 |
| 98  | C7 | PX  | -0.21692 | 0.00000  | 0.12044  | 0.00000  | 0.06689  |
| 99  | C7 | PY  | 0.15999  | 0.00000  | 0.20574  | 0.00000  | -0.00639 |
| 100 | C7 | PZ  | 0.00000  | -0.06268 | 0.00000  | -0.12865 | 0.00000  |
| 101 | C7 | S   | -3.45760 | 0.00000  | -1.37941 | 0.00000  | -0.48163 |
| 102 | C7 | PX  | 0.83051  | 0.00000  | -2.18185 | 0.00000  | -0.86266 |
| 103 | C7 | PY  | -0.70204 | 0.00000  | 0.69440  | 0.00000  | 0.47067  |
| 104 | C7 | PZ  | 0.00000  | 0.15542  | 0.00000  | 0.07644  | 0.00000  |
| 105 | C7 | DXX | 0.09430  | 0.00000  | 0.09873  | 0.00000  | 0.00439  |
| 106 | C7 | DYY | 0.01718  | 0.00000  | -0.03440 | 0.00000  | -0.01474 |
| 107 | C7 | DZZ | -0.03555 | 0.00000  | -0.04725 | 0.00000  | 0.02414  |
| 108 | C7 | DXY | 0.05791  | 0.00000  | -0.10896 | 0.00000  | -0.05843 |
| 109 | C7 | DXZ | 0.00000  | -0.09901 | 0.00000  | -0.21162 | 0.00000  |
| 110 | C7 | DYZ | 0.00000  | 0.01264  | 0.00000  | 0.23441  | 0.00000  |
| 111 | H3 | S   | -0.12234 | 0.00000  | 0.18169  | 0.00000  | -0.35215 |
| 112 | H3 | S   | -0.19015 | 0.00000  | 0.30020  | 0.00000  | -0.64776 |
| 113 | H3 | PX  | -0.01628 | 0.00000  | -0.00251 | 0.00000  | 0.01010  |
| 114 | H3 | PY  | -0.00625 | 0.00000  | 0.00095  | 0.00000  | -0.03423 |
| 115 | H3 | PZ  | 0.00000  | -0.07731 | 0.00000  | -0.15162 | 0.00000  |
| 116 | H4 | S   | 0.22069  | 0.00000  | 0.16750  | 0.00000  | -0.19237 |
| 117 | H4 | S   | 0.37220  | 0.00000  | 0.23115  | 0.00000  | -0.39060 |
| 118 | H4 | PX  | -0.00019 | 0.00000  | 0.00030  | 0.00000  | -0.01944 |
| 119 | H4 | PY  | 0.00706  | 0.00000  | 0.01587  | 0.00000  | -0.02379 |
| 120 | H4 | PZ  | 0.00000  | -0.09620 | 0.00000  | -0.15832 | 0.00000  |
| 121 | N1 | S   | 0.00471  | 0.00000  | -0.00225 | 0.00000  | 0.00044  |
| 122 | N1 | S   | 0.09928  | 0.00000  | 0.18761  | 0.00000  | -0.08806 |
| 123 | N1 | PX  | 0.15628  | 0.00000  | -0.01977 | 0.00000  | -0.03524 |
| 124 | N1 | PY  | -0.33350 | 0.00000  | 0.15179  | 0.00000  | -0.06519 |
| 125 | N1 | PZ  | 0.00000  | -0.01191 | 0.00000  | -0.02854 | 0.00000  |
| 126 | N1 | S   | -0.15982 | 0.00000  | -0.14620 | 0.00000  | -0.42149 |
| 127 | N1 | PX  | -0.75668 | 0.00000  | 0.35364  | 0.00000  | 0.23253  |
| 128 | N1 | PY  | 1.41658  | 0.00000  | -1.99517 | 0.00000  | -1.08595 |
| 129 | N1 | PZ  | 0.00000  | 0.01214  | 0.00000  | 0.09910  | 0.00000  |
| 130 | N1 | DXX | 0.06359  | 0.00000  | 0.04519  | 0.00000  | -0.01318 |
| 131 | N1 | DYY | -0.00175 | 0.00000  | 0.00075  | 0.00000  | -0.03579 |
| 132 | N1 | DZZ | 0.00113  | 0.00000  | -0.00001 | 0.00000  | 0.02305  |
| 133 | N1 | DXY | -0.05802 | 0.00000  | -0.01337 | 0.00000  | 0.00304  |
| 134 | N1 | DXZ | 0.00000  | 0.20278  | 0.00000  | -0.10764 | 0.00000  |
| 135 | N1 | DYZ | 0.00000  | -0.23406 | 0.00000  | 0.13400  | 0.00000  |
| 136 | H6 | S   | -0.00172 | 0.00000  | -0.25534 | 0.00000  | 0.56581  |
| 137 | H6 | S   | 0.08559  | 0.00000  | -0.52950 | 0.00000  | 0.97426  |
| 138 | H6 | PX  | -0.01493 | 0.00000  | 0.02173  | 0.00000  | -0.04102 |
| 139 | H6 | PY  | 0.02641  | 0.00000  | 0.00877  | 0.00000  | -0.01611 |
| 140 | H6 | PZ  | 0.00000  | -0.01781 | 0.00000  | -0.10407 | 0.00000  |
| 141 | C8 | S   | -0.00205 | 0.00000  | -0.01933 | 0.00000  | 0.00202  |

|     |     |     |          |          |          |          |          |
|-----|-----|-----|----------|----------|----------|----------|----------|
| 142 | C8  | S   | -0.34885 | 0.00000  | -0.47075 | 0.00000  | -0.00898 |
| 143 | C8  | PX  | -0.20779 | 0.00000  | -0.44455 | 0.00000  | -0.21274 |
| 144 | C8  | PY  | 0.33708  | 0.00000  | -0.08884 | 0.00000  | -0.20834 |
| 145 | C8  | PZ  | 0.00000  | -0.00388 | 0.00000  | 0.01628  | 0.00000  |
| 146 | C8  | S   | 4.36494  | 0.00000  | -0.45535 | 0.00000  | -1.78246 |
| 147 | C8  | PX  | 0.58506  | 0.00000  | 3.08165  | 0.00000  | 1.64697  |
| 148 | C8  | PY  | -4.19067 | 0.00000  | 0.40119  | 0.00000  | 1.44049  |
| 149 | C8  | PZ  | 0.00000  | 0.01917  | 0.00000  | -0.03718 | 0.00000  |
| 150 | C8  | DXX | 0.11733  | 0.00000  | -0.10037 | 0.00000  | -0.07435 |
| 151 | C8  | DYY | 0.02887  | 0.00000  | -0.00886 | 0.00000  | -0.03904 |
| 152 | C8  | DZZ | -0.07850 | 0.00000  | 0.01934  | 0.00000  | 0.06899  |
| 153 | C8  | DXY | -0.01820 | 0.00000  | 0.02019  | 0.00000  | 0.00163  |
| 154 | C8  | DXZ | 0.00000  | -0.18752 | 0.00000  | 0.14082  | 0.00000  |
| 155 | C8  | DYZ | 0.00000  | 0.37288  | 0.00000  | -0.05044 | 0.00000  |
| 156 | H8  | S   | 0.12507  | 0.00000  | 0.67939  | 0.00000  | 0.26270  |
| 157 | H8  | S   | -0.07844 | 0.00000  | 0.95111  | 0.00000  | 0.39436  |
| 158 | H8  | PX  | 0.02544  | 0.00000  | 0.03823  | 0.00000  | 0.02108  |
| 159 | H8  | PY  | 0.01667  | 0.00000  | -0.03878 | 0.00000  | -0.01580 |
| 160 | H8  | PZ  | 0.00000  | -0.01468 | 0.00000  | -0.14691 | 0.00000  |
| 161 | C10 | S   | 0.03075  | 0.00000  | 0.00390  | 0.00000  | -0.01121 |
| 162 | C10 | S   | 0.20284  | 0.00000  | 0.16609  | 0.00000  | -0.12054 |
| 163 | C10 | PX  | 0.09807  | 0.00000  | 0.00150  | 0.00000  | 0.00136  |
| 164 | C10 | PY  | -0.29059 | 0.00000  | 0.11132  | 0.00000  | 0.07779  |
| 165 | C10 | PZ  | 0.00000  | 0.13965  | 0.00000  | -0.02475 | 0.00000  |
| 166 | C10 | S   | -4.78029 | 0.00000  | 0.23405  | 0.00000  | 1.83212  |
| 167 | C10 | PX  | -1.26447 | 0.00000  | -1.56879 | 0.00000  | -0.74253 |
| 168 | C10 | PY  | -1.68857 | 0.00000  | 0.09094  | 0.00000  | 0.81819  |
| 169 | C10 | PZ  | 0.00000  | -0.10333 | 0.00000  | 0.02708  | 0.00000  |
| 170 | C10 | DXX | 0.08434  | 0.00000  | 0.01743  | 0.00000  | -0.06108 |
| 171 | C10 | DYY | -0.10277 | 0.00000  | 0.03004  | 0.00000  | 0.05091  |
| 172 | C10 | DZZ | -0.00200 | 0.00000  | -0.01360 | 0.00000  | 0.02693  |
| 173 | C10 | DXY | -0.09188 | 0.00000  | -0.09460 | 0.00000  | -0.03470 |
| 174 | C10 | DXZ | 0.00000  | -0.17938 | 0.00000  | 0.16650  | 0.00000  |
| 175 | C10 | DYZ | 0.00000  | -0.32017 | 0.00000  | 0.04691  | 0.00000  |
| 176 | H16 | S   | 0.33587  | 0.00000  | 0.25345  | 0.00000  | 0.09543  |
| 177 | H16 | S   | 0.43461  | 0.00000  | 0.45279  | 0.00000  | 0.24638  |
| 178 | H16 | PX  | -0.02746 | 0.00000  | 0.00459  | 0.00000  | 0.00900  |
| 179 | H16 | PY  | -0.00259 | 0.00000  | -0.02302 | 0.00000  | -0.01947 |
| 180 | H16 | PZ  | 0.00000  | 0.02362  | 0.00000  | 0.05373  | 0.00000  |
| 181 | H18 | S   | -0.10308 | 0.00000  | -0.27759 | 0.00000  | -0.16883 |
| 182 | H18 | S   | -0.28653 | 0.00000  | -0.47463 | 0.00000  | -0.22871 |
| 183 | H18 | PX  | -0.00794 | 0.00000  | 0.01184  | 0.00000  | -0.00055 |
| 184 | H18 | PY  | 0.04578  | 0.00000  | 0.02161  | 0.00000  | 0.00430  |
| 185 | H18 | PZ  | 0.00000  | 0.13878  | 0.00000  | -0.07727 | 0.00000  |

|              |          |          |          |          |          |
|--------------|----------|----------|----------|----------|----------|
| MO:          | 106      | 107      | 108      | 109      | 110      |
| Eigenvalues: | 1.67544  | 1.69183  | 1.70830  | 1.71739  | 1.75678  |
| (ev):        | 45.59108 | 46.03698 | 46.48529 | 46.73262 | 47.80450 |

|   |    |    |         |         |         |         |         |
|---|----|----|---------|---------|---------|---------|---------|
|   |    | A  | A       | A       | A       | A       |         |
| 1 | H1 | S  | 0.00000 | 0.00000 | 0.00000 | 0.18877 | 0.00000 |
| 2 | H1 | S  | 0.00000 | 0.00000 | 0.00000 | 0.39725 | 0.00000 |
| 3 | H1 | PX | 0.00000 | 0.00000 | 0.00000 | 0.01369 | 0.00000 |
| 4 | H1 | PY | 0.00000 | 0.00000 | 0.00000 | 0.02313 | 0.00000 |

|    |    |     |          |          |          |          |          |
|----|----|-----|----------|----------|----------|----------|----------|
| 5  | H1 | PZ  | -0.11533 | -0.08923 | -0.13202 | 0.00000  | -0.05594 |
| 6  | C1 | S   | 0.00000  | 0.00000  | 0.00000  | -0.00257 | 0.00000  |
| 7  | C1 | S   | 0.00000  | 0.00000  | 0.00000  | 0.06141  | 0.00000  |
| 8  | C1 | PX  | 0.00000  | 0.00000  | 0.00000  | -0.01189 | 0.00000  |
| 9  | C1 | PY  | 0.00000  | 0.00000  | 0.00000  | -0.27039 | 0.00000  |
| 10 | C1 | PZ  | -0.08720 | -0.05664 | -0.08988 | 0.00000  | -0.04050 |
| 11 | C1 | S   | 0.00000  | 0.00000  | 0.00000  | -0.16957 | 0.00000  |
| 12 | C1 | PX  | 0.00000  | 0.00000  | 0.00000  | -0.95131 | 0.00000  |
| 13 | C1 | PY  | 0.00000  | 0.00000  | 0.00000  | 0.46300  | 0.00000  |
| 14 | C1 | PZ  | 0.12742  | -0.00768 | 0.06374  | 0.00000  | 0.07131  |
| 15 | C1 | DXX | 0.00000  | 0.00000  | 0.00000  | 0.03049  | 0.00000  |
| 16 | C1 | DYY | 0.00000  | 0.00000  | 0.00000  | -0.02803 | 0.00000  |
| 17 | C1 | DZZ | 0.00000  | 0.00000  | 0.00000  | 0.04741  | 0.00000  |
| 18 | C1 | DXY | 0.00000  | 0.00000  | 0.00000  | 0.08502  | 0.00000  |
| 19 | C1 | DXZ | -0.27503 | -0.15978 | -0.20844 | 0.00000  | -0.09342 |
| 20 | C1 | DYZ | 0.15515  | 0.20716  | -0.08253 | 0.00000  | -0.07058 |
| 21 | C2 | S   | 0.00000  | 0.00000  | 0.00000  | -0.01510 | 0.00000  |
| 22 | C2 | S   | 0.00000  | 0.00000  | 0.00000  | -0.26223 | 0.00000  |
| 23 | C2 | PX  | 0.00000  | 0.00000  | 0.00000  | -0.09078 | 0.00000  |
| 24 | C2 | PY  | 0.00000  | 0.00000  | 0.00000  | 0.17020  | 0.00000  |
| 25 | C2 | PZ  | 0.13779  | -0.02831 | -0.07732 | 0.00000  | -0.00489 |
| 26 | C2 | S   | 0.00000  | 0.00000  | 0.00000  | 1.96870  | 0.00000  |
| 27 | C2 | PX  | 0.00000  | 0.00000  | 0.00000  | 1.18305  | 0.00000  |
| 28 | C2 | PY  | 0.00000  | 0.00000  | 0.00000  | -0.09343 | 0.00000  |
| 29 | C2 | PZ  | -0.15731 | 0.08355  | -0.01151 | 0.00000  | -0.05747 |
| 30 | C2 | DXX | 0.00000  | 0.00000  | 0.00000  | -0.02408 | 0.00000  |
| 31 | C2 | DYY | 0.00000  | 0.00000  | 0.00000  | -0.01570 | 0.00000  |
| 32 | C2 | DZZ | 0.00000  | 0.00000  | 0.00000  | 0.02371  | 0.00000  |
| 33 | C2 | DXY | 0.00000  | 0.00000  | 0.00000  | 0.09297  | 0.00000  |
| 34 | C2 | DXZ | -0.37765 | 0.06346  | 0.17859  | 0.00000  | -0.01868 |
| 35 | C2 | DYZ | -0.12088 | -0.31640 | 0.02135  | 0.00000  | 0.04371  |
| 36 | C3 | S   | 0.00000  | 0.00000  | 0.00000  | 0.01646  | 0.00000  |
| 37 | C3 | S   | 0.00000  | 0.00000  | 0.00000  | 0.28890  | 0.00000  |
| 38 | C3 | PX  | 0.00000  | 0.00000  | 0.00000  | -0.24303 | 0.00000  |
| 39 | C3 | PY  | 0.00000  | 0.00000  | 0.00000  | 0.43542  | 0.00000  |
| 40 | C3 | PZ  | 0.02903  | -0.02479 | 0.05502  | 0.00000  | 0.02598  |
| 41 | C3 | S   | 0.00000  | 0.00000  | 0.00000  | -0.36275 | 0.00000  |
| 42 | C3 | PX  | 0.00000  | 0.00000  | 0.00000  | 3.64418  | 0.00000  |
| 43 | C3 | PY  | 0.00000  | 0.00000  | 0.00000  | -4.71179 | 0.00000  |
| 44 | C3 | PZ  | -0.15028 | 0.14342  | -0.10873 | 0.00000  | -0.14665 |
| 45 | C3 | DXX | 0.00000  | 0.00000  | 0.00000  | 0.01213  | 0.00000  |
| 46 | C3 | DYY | 0.00000  | 0.00000  | 0.00000  | 0.05542  | 0.00000  |
| 47 | C3 | DZZ | 0.00000  | 0.00000  | 0.00000  | -0.01514 | 0.00000  |
| 48 | C3 | DXY | 0.00000  | 0.00000  | 0.00000  | -0.01658 | 0.00000  |
| 49 | C3 | DXZ | -0.01274 | -0.06082 | 0.34403  | 0.00000  | 0.22271  |
| 50 | C3 | DYZ | -0.06707 | -0.02286 | 0.09469  | 0.00000  | 0.03032  |
| 51 | C4 | S   | 0.00000  | 0.00000  | 0.00000  | -0.03518 | 0.00000  |
| 52 | C4 | S   | 0.00000  | 0.00000  | 0.00000  | -0.66185 | 0.00000  |
| 53 | C4 | PX  | 0.00000  | 0.00000  | 0.00000  | -0.10352 | 0.00000  |
| 54 | C4 | PY  | 0.00000  | 0.00000  | 0.00000  | 0.28739  | 0.00000  |
| 55 | C4 | PZ  | -0.12278 | -0.04437 | 0.02767  | 0.00000  | 0.00589  |
| 56 | C4 | S   | 0.00000  | 0.00000  | 0.00000  | 2.05968  | 0.00000  |
| 57 | C4 | PX  | 0.00000  | 0.00000  | 0.00000  | -1.28250 | 0.00000  |
| 58 | C4 | PY  | 0.00000  | 0.00000  | 0.00000  | -2.78021 | 0.00000  |



|     |    |     |          |          |          |          |          |
|-----|----|-----|----------|----------|----------|----------|----------|
| 59  | C4 | PZ  | 0.05443  | 0.02186  | -0.01387 | 0.00000  | -0.00793 |
| 60  | C4 | DXX | 0.00000  | 0.00000  | 0.00000  | -0.03755 | 0.00000  |
| 61  | C4 | DYY | 0.00000  | 0.00000  | 0.00000  | -0.01356 | 0.00000  |
| 62  | C4 | DZZ | 0.00000  | 0.00000  | 0.00000  | 0.05610  | 0.00000  |
| 63  | C4 | DXY | 0.00000  | 0.00000  | 0.00000  | 0.06489  | 0.00000  |
| 64  | C4 | DXZ | -0.12380 | 0.22358  | 0.24843  | 0.00000  | 0.03639  |
| 65  | C4 | DYZ | -0.36740 | -0.12138 | 0.00313  | 0.00000  | -0.01615 |
| 66  | C5 | S   | 0.00000  | 0.00000  | 0.00000  | 0.03517  | 0.00000  |
| 67  | C5 | S   | 0.00000  | 0.00000  | 0.00000  | 0.74956  | 0.00000  |
| 68  | C5 | PX  | 0.00000  | 0.00000  | 0.00000  | 0.03968  | 0.00000  |
| 69  | C5 | PY  | 0.00000  | 0.00000  | 0.00000  | -0.22056 | 0.00000  |
| 70  | C5 | PZ  | 0.06371  | 0.12183  | 0.00690  | 0.00000  | -0.00069 |
| 71  | C5 | S   | 0.00000  | 0.00000  | 0.00000  | -3.32226 | 0.00000  |
| 72  | C5 | PX  | 0.00000  | 0.00000  | 0.00000  | -1.59912 | 0.00000  |
| 73  | C5 | PY  | 0.00000  | 0.00000  | 0.00000  | 3.19302  | 0.00000  |
| 74  | C5 | PZ  | -0.01307 | -0.08621 | 0.01572  | 0.00000  | 0.01088  |
| 75  | C5 | DXX | 0.00000  | 0.00000  | 0.00000  | -0.01023 | 0.00000  |
| 76  | C5 | DYY | 0.00000  | 0.00000  | 0.00000  | -0.03074 | 0.00000  |
| 77  | C5 | DZZ | 0.00000  | 0.00000  | 0.00000  | 0.04315  | 0.00000  |
| 78  | C5 | DXY | 0.00000  | 0.00000  | 0.00000  | 0.05761  | 0.00000  |
| 79  | C5 | DXZ | 0.11412  | -0.14703 | -0.26506 | 0.00000  | -0.06402 |
| 80  | C5 | DYZ | 0.23229  | 0.29717  | -0.06080 | 0.00000  | -0.01869 |
| 81  | C6 | S   | 0.00000  | 0.00000  | 0.00000  | -0.03676 | 0.00000  |
| 82  | C6 | S   | 0.00000  | 0.00000  | 0.00000  | -0.65305 | 0.00000  |
| 83  | C6 | PX  | 0.00000  | 0.00000  | 0.00000  | -0.03058 | 0.00000  |
| 84  | C6 | PY  | 0.00000  | 0.00000  | 0.00000  | -0.20266 | 0.00000  |
| 85  | C6 | PZ  | -0.05427 | 0.07636  | -0.00733 | 0.00000  | -0.01603 |
| 86  | C6 | S   | 0.00000  | 0.00000  | 0.00000  | 1.94103  | 0.00000  |
| 87  | C6 | PX  | 0.00000  | 0.00000  | 0.00000  | 2.91116  | 0.00000  |
| 88  | C6 | PY  | 0.00000  | 0.00000  | 0.00000  | 2.38710  | 0.00000  |
| 89  | C6 | PZ  | 0.19009  | -0.23437 | 0.11718  | 0.00000  | 0.20531  |
| 90  | C6 | DXX | 0.00000  | 0.00000  | 0.00000  | -0.02017 | 0.00000  |
| 91  | C6 | DYY | 0.00000  | 0.00000  | 0.00000  | -0.11488 | 0.00000  |
| 92  | C6 | DZZ | 0.00000  | 0.00000  | 0.00000  | 0.05800  | 0.00000  |
| 93  | C6 | DXY | 0.00000  | 0.00000  | 0.00000  | 0.02438  | 0.00000  |
| 94  | C6 | DXZ | -0.04750 | -0.08304 | -0.33565 | 0.00000  | -0.06527 |
| 95  | C6 | DYZ | -0.20113 | 0.38902  | -0.04034 | 0.00000  | -0.12448 |
| 96  | C7 | S   | 0.00000  | 0.00000  | 0.00000  | 0.01508  | 0.00000  |
| 97  | C7 | S   | 0.00000  | 0.00000  | 0.00000  | 0.12410  | 0.00000  |
| 98  | C7 | PX  | 0.00000  | 0.00000  | 0.00000  | -0.01986 | 0.00000  |
| 99  | C7 | PY  | 0.00000  | 0.00000  | 0.00000  | -0.20481 | 0.00000  |
| 100 | C7 | PZ  | -0.00385 | -0.04932 | -0.03279 | 0.00000  | 0.06456  |
| 101 | C7 | S   | 0.00000  | 0.00000  | 0.00000  | -3.26782 | 0.00000  |
| 102 | C7 | PX  | 0.00000  | 0.00000  | 0.00000  | -0.30467 | 0.00000  |
| 103 | C7 | PY  | 0.00000  | 0.00000  | 0.00000  | -2.43614 | 0.00000  |
| 104 | C7 | PZ  | 0.04210  | 0.02234  | 0.00253  | 0.00000  | -0.10467 |
| 105 | C7 | DXX | 0.00000  | 0.00000  | 0.00000  | 0.03273  | 0.00000  |
| 106 | C7 | DYY | 0.00000  | 0.00000  | 0.00000  | -0.05899 | 0.00000  |
| 107 | C7 | DZZ | 0.00000  | 0.00000  | 0.00000  | 0.00418  | 0.00000  |
| 108 | C7 | DXY | 0.00000  | 0.00000  | 0.00000  | 0.05152  | 0.00000  |
| 109 | C7 | DXZ | 0.07121  | -0.14705 | -0.05723 | 0.00000  | 0.28102  |
| 110 | C7 | DYZ | 0.09275  | 0.00454  | 0.04467  | 0.00000  | 0.17154  |
| 111 | H3 | S   | 0.00000  | 0.00000  | 0.00000  | 0.52633  | 0.00000  |
| 112 | H3 | S   | 0.00000  | 0.00000  | 0.00000  | 0.93395  | 0.00000  |

|     |     |     |          |          |          |          |          |
|-----|-----|-----|----------|----------|----------|----------|----------|
| 113 | H3  | PX  | 0.00000  | 0.00000  | 0.00000  | 0.02609  | 0.00000  |
| 114 | H3  | PY  | 0.00000  | 0.00000  | 0.00000  | 0.02738  | 0.00000  |
| 115 | H3  | PZ  | -0.20349 | -0.02175 | 0.07109  | 0.00000  | 0.00757  |
| 116 | H4  | S   | 0.00000  | 0.00000  | 0.00000  | -0.52319 | 0.00000  |
| 117 | H4  | S   | 0.00000  | 0.00000  | 0.00000  | -0.97332 | 0.00000  |
| 118 | H4  | PX  | 0.00000  | 0.00000  | 0.00000  | 0.03694  | 0.00000  |
| 119 | H4  | PY  | 0.00000  | 0.00000  | 0.00000  | -0.02806 | 0.00000  |
| 120 | H4  | PZ  | 0.08027  | 0.18870  | 0.05172  | 0.00000  | 0.00870  |
| 121 | N1  | S   | 0.00000  | 0.00000  | 0.00000  | 0.02570  | 0.00000  |
| 122 | N1  | S   | 0.00000  | 0.00000  | 0.00000  | 0.53496  | 0.00000  |
| 123 | N1  | PX  | 0.00000  | 0.00000  | 0.00000  | 0.24219  | 0.00000  |
| 124 | N1  | PY  | 0.00000  | 0.00000  | 0.00000  | -0.03141 | 0.00000  |
| 125 | N1  | PZ  | -0.02838 | 0.09573  | -0.02963 | 0.00000  | -0.09685 |
| 126 | N1  | S   | 0.00000  | 0.00000  | 0.00000  | -1.03275 | 0.00000  |
| 127 | N1  | PX  | 0.00000  | 0.00000  | 0.00000  | -1.36071 | 0.00000  |
| 128 | N1  | PY  | 0.00000  | 0.00000  | 0.00000  | 1.87505  | 0.00000  |
| 129 | N1  | PZ  | -0.13507 | 0.09192  | -0.17085 | 0.00000  | -0.14473 |
| 130 | N1  | DXX | 0.00000  | 0.00000  | 0.00000  | 0.11647  | 0.00000  |
| 131 | N1  | DYY | 0.00000  | 0.00000  | 0.00000  | 0.10846  | 0.00000  |
| 132 | N1  | DZZ | 0.00000  | 0.00000  | 0.00000  | 0.00202  | 0.00000  |
| 133 | N1  | DXY | 0.00000  | 0.00000  | 0.00000  | 0.00885  | 0.00000  |
| 134 | N1  | DXZ | 0.11699  | -0.16583 | 0.11267  | 0.00000  | 0.34653  |
| 135 | N1  | DYZ | 0.08287  | -0.21007 | 0.12886  | 0.00000  | -0.05238 |
| 136 | H6  | S   | 0.00000  | 0.00000  | 0.00000  | 0.16673  | 0.00000  |
| 137 | H6  | S   | 0.00000  | 0.00000  | 0.00000  | 0.28139  | 0.00000  |
| 138 | H6  | PX  | 0.00000  | 0.00000  | 0.00000  | -0.01158 | 0.00000  |
| 139 | H6  | PY  | 0.00000  | 0.00000  | 0.00000  | 0.00123  | 0.00000  |
| 140 | H6  | PZ  | 0.17994  | -0.02468 | -0.12280 | 0.00000  | -0.00432 |
| 141 | C8  | S   | 0.00000  | 0.00000  | 0.00000  | -0.00204 | 0.00000  |
| 142 | C8  | S   | 0.00000  | 0.00000  | 0.00000  | -0.17247 | 0.00000  |
| 143 | C8  | PX  | 0.00000  | 0.00000  | 0.00000  | 0.13001  | 0.00000  |
| 144 | C8  | PY  | 0.00000  | 0.00000  | 0.00000  | 0.05338  | 0.00000  |
| 145 | C8  | PZ  | 0.00559  | -0.01512 | -0.01864 | 0.00000  | -0.02693 |
| 146 | C8  | S   | 0.00000  | 0.00000  | 0.00000  | 2.13005  | 0.00000  |
| 147 | C8  | PX  | 0.00000  | 0.00000  | 0.00000  | -2.81803 | 0.00000  |
| 148 | C8  | PY  | 0.00000  | 0.00000  | 0.00000  | -0.12328 | 0.00000  |
| 149 | C8  | PZ  | 0.01338  | 0.01420  | 0.18985  | 0.00000  | 0.18452  |
| 150 | C8  | DXX | 0.00000  | 0.00000  | 0.00000  | 0.03195  | 0.00000  |
| 151 | C8  | DYY | 0.00000  | 0.00000  | 0.00000  | 0.01777  | 0.00000  |
| 152 | C8  | DZZ | 0.00000  | 0.00000  | 0.00000  | -0.01522 | 0.00000  |
| 153 | C8  | DXY | 0.00000  | 0.00000  | 0.00000  | -0.06177 | 0.00000  |
| 154 | C8  | DXZ | -0.12675 | 0.07347  | -0.04130 | 0.00000  | -0.28764 |
| 155 | C8  | DYZ | -0.02792 | 0.07264  | 0.19323  | 0.00000  | 0.12181  |
| 156 | H8  | S   | 0.00000  | 0.00000  | 0.00000  | 0.17034  | 0.00000  |
| 157 | H8  | S   | 0.00000  | 0.00000  | 0.00000  | 0.03792  | 0.00000  |
| 158 | H8  | PX  | 0.00000  | 0.00000  | 0.00000  | -0.01419 | 0.00000  |
| 159 | H8  | PY  | 0.00000  | 0.00000  | 0.00000  | -0.03700 | 0.00000  |
| 160 | H8  | PZ  | 0.02629  | -0.07149 | -0.04780 | 0.00000  | 0.09909  |
| 161 | C10 | S   | 0.00000  | 0.00000  | 0.00000  | 0.01201  | 0.00000  |
| 162 | C10 | S   | 0.00000  | 0.00000  | 0.00000  | 0.08936  | 0.00000  |
| 163 | C10 | PX  | 0.00000  | 0.00000  | 0.00000  | 0.01742  | 0.00000  |
| 164 | C10 | PY  | 0.00000  | 0.00000  | 0.00000  | -0.06026 | 0.00000  |
| 165 | C10 | PZ  | -0.02580 | 0.04612  | 0.05719  | 0.00000  | 0.02630  |
| 166 | C10 | S   | 0.00000  | 0.00000  | 0.00000  | -1.07349 | 0.00000  |

|     |     |     |          |          |          |          |          |
|-----|-----|-----|----------|----------|----------|----------|----------|
| 167 | C10 | PX  | 0.00000  | 0.00000  | 0.00000  | 1.00817  | 0.00000  |
| 168 | C10 | PY  | 0.00000  | 0.00000  | 0.00000  | -0.51510 | 0.00000  |
| 169 | C10 | PZ  | 0.02478  | -0.05342 | -0.09662 | 0.00000  | -0.07295 |
| 170 | C10 | DXX | 0.00000  | 0.00000  | 0.00000  | 0.00928  | 0.00000  |
| 171 | C10 | DYY | 0.00000  | 0.00000  | 0.00000  | -0.03298 | 0.00000  |
| 172 | C10 | DZZ | 0.00000  | 0.00000  | 0.00000  | 0.01390  | 0.00000  |
| 173 | C10 | DXY | 0.00000  | 0.00000  | 0.00000  | 0.05278  | 0.00000  |
| 174 | C10 | DXZ | -0.19235 | 0.20254  | -0.33956 | 0.00000  | 0.45400  |
| 175 | C10 | DYZ | 0.06200  | -0.10906 | -0.14789 | 0.00000  | -0.12588 |
| 176 | H16 | S   | 0.00000  | 0.00000  | 0.00000  | -0.07752 | 0.00000  |
| 177 | H16 | S   | 0.00000  | 0.00000  | 0.00000  | -0.33391 | 0.00000  |
| 178 | H16 | PX  | 0.00000  | 0.00000  | 0.00000  | -0.01413 | 0.00000  |
| 179 | H16 | PY  | 0.00000  | 0.00000  | 0.00000  | 0.00651  | 0.00000  |
| 180 | H16 | PZ  | -0.09591 | 0.11699  | -0.11468 | 0.00000  | 0.27146  |
| 181 | H18 | S   | 0.00000  | 0.00000  | 0.00000  | 0.20173  | 0.00000  |
| 182 | H18 | S   | 0.00000  | 0.00000  | 0.00000  | 0.30292  | 0.00000  |
| 183 | H18 | PX  | 0.00000  | 0.00000  | 0.00000  | -0.00734 | 0.00000  |
| 184 | H18 | PY  | 0.00000  | 0.00000  | 0.00000  | -0.00620 | 0.00000  |
| 185 | H18 | PZ  | 0.07312  | -0.07348 | 0.19352  | 0.00000  | -0.22480 |

|              |          |          |          |          |          |
|--------------|----------|----------|----------|----------|----------|
| MO:          | 111      | 112      | 113      | 114      | 115      |
| Eigenvalues: | 1.90008  | 1.98176  | 2.03536  | 2.08417  | 2.11203  |
| (ev):        | 51.70382 | 53.92646 | 55.38507 | 56.71307 | 57.47129 |

|    |    | A   | A        | A        | A        | A        |          |
|----|----|-----|----------|----------|----------|----------|----------|
| 1  | H1 | S   | 0.02940  | 0.17515  | 0.09118  | -0.11837 | 0.00000  |
| 2  | H1 | S   | 0.14438  | 0.08649  | 0.17843  | -0.63434 | 0.00000  |
| 3  | H1 | PX  | -0.00262 | 0.03372  | 0.03374  | -0.00606 | 0.00000  |
| 4  | H1 | PY  | -0.06170 | 0.05499  | -0.04336 | -0.01170 | 0.00000  |
| 5  | H1 | PZ  | 0.00000  | 0.00000  | 0.00000  | 0.00000  | -0.20587 |
| 6  | C1 | S   | -0.00964 | -0.00174 | -0.01986 | 0.03230  | 0.00000  |
| 7  | C1 | S   | -0.00433 | -0.11068 | -0.27589 | 0.56810  | 0.00000  |
| 8  | C1 | PX  | -0.01352 | 0.02930  | 0.03824  | -0.09780 | 0.00000  |
| 9  | C1 | PY  | -0.07302 | 0.14042  | -0.00328 | -0.17965 | 0.00000  |
| 10 | C1 | PZ  | 0.00000  | 0.00000  | 0.00000  | 0.00000  | -0.00250 |
| 11 | C1 | S   | 0.05080  | 0.14900  | 1.08214  | -1.85854 | 0.00000  |
| 12 | C1 | PX  | -0.37038 | -0.33056 | -0.81329 | 2.24590  | 0.00000  |
| 13 | C1 | PY  | 0.53350  | -0.14059 | -0.23857 | -0.87888 | 0.00000  |
| 14 | C1 | PZ  | 0.00000  | 0.00000  | 0.00000  | 0.00000  | 0.48008  |
| 15 | C1 | DXX | 0.01871  | -0.09201 | -0.00736 | -0.14035 | 0.00000  |
| 16 | C1 | DYY | -0.12964 | 0.07321  | 0.10109  | -0.04864 | 0.00000  |
| 17 | C1 | DZZ | 0.15966  | -0.00226 | -0.12691 | 0.12514  | 0.00000  |
| 18 | C1 | DXY | -0.17550 | 0.05258  | -0.09140 | -0.09792 | 0.00000  |
| 19 | C1 | DXZ | 0.00000  | 0.00000  | 0.00000  | 0.00000  | -0.34103 |
| 20 | C1 | DYZ | 0.00000  | 0.00000  | 0.00000  | 0.00000  | -0.42207 |
| 21 | C2 | S   | 0.00104  | 0.00416  | -0.02034 | -0.01253 | 0.00000  |
| 22 | C2 | S   | 0.31604  | -0.05888 | -0.19422 | -0.52261 | 0.00000  |
| 23 | C2 | PX  | 0.14188  | -0.04077 | -0.03856 | -0.20266 | 0.00000  |
| 24 | C2 | PY  | -0.26215 | 0.04597  | -0.05319 | 0.08971  | 0.00000  |
| 25 | C2 | PZ  | 0.00000  | 0.00000  | 0.00000  | 0.00000  | 0.01522  |
| 26 | C2 | S   | -0.09818 | 0.18751  | 1.08387  | 1.07143  | 0.00000  |
| 27 | C2 | PX  | -0.31860 | 1.26788  | -0.08509 | 2.22179  | 0.00000  |
| 28 | C2 | PY  | 0.18056  | 1.21552  | -0.93133 | 1.90685  | 0.00000  |
| 29 | C2 | PZ  | 0.00000  | 0.00000  | 0.00000  | 0.00000  | -0.14380 |

|    |    |     |          |          |          |          |          |
|----|----|-----|----------|----------|----------|----------|----------|
| 30 | C2 | DXX | -0.00630 | 0.04090  | -0.00894 | 0.12069  | 0.00000  |
| 31 | C2 | DYY | -0.10289 | 0.06570  | 0.06111  | -0.04176 | 0.00000  |
| 32 | C2 | DZZ | 0.15039  | -0.13318 | -0.09575 | -0.06630 | 0.00000  |
| 33 | C2 | DXY | 0.11501  | -0.15403 | 0.09875  | 0.12149  | 0.00000  |
| 34 | C2 | DXZ | 0.00000  | 0.00000  | 0.00000  | 0.00000  | -0.05656 |
| 35 | C2 | DYZ | 0.00000  | 0.00000  | 0.00000  | 0.00000  | 0.20281  |
| 36 | C3 | S   | 0.02047  | -0.01786 | 0.01937  | -0.07343 | 0.00000  |
| 37 | C3 | S   | 0.29296  | -0.28471 | 0.04949  | -0.91219 | 0.00000  |
| 38 | C3 | PX  | 0.11855  | 0.03057  | 0.17901  | 0.21764  | 0.00000  |
| 39 | C3 | PY  | -0.05758 | -0.12683 | 0.06107  | 0.12365  | 0.00000  |
| 40 | C3 | PZ  | 0.00000  | 0.00000  | 0.00000  | 0.00000  | -0.04555 |
| 41 | C3 | S   | -0.86425 | 3.39861  | -3.17790 | 9.96294  | 0.00000  |
| 42 | C3 | PX  | 0.54557  | -1.04434 | 0.70849  | -4.36380 | 0.00000  |
| 43 | C3 | PY  | 1.26861  | -0.06530 | -0.25172 | -3.25528 | 0.00000  |
| 44 | C3 | PZ  | 0.00000  | 0.00000  | 0.00000  | 0.00000  | -0.86932 |
| 45 | C3 | DXX | 0.11577  | 0.04921  | 0.31377  | 0.03545  | 0.00000  |
| 46 | C3 | DYY | -0.15884 | 0.02215  | -0.08473 | -0.03810 | 0.00000  |
| 47 | C3 | DZZ | 0.06128  | -0.12858 | -0.27590 | 0.15337  | 0.00000  |
| 48 | C3 | DXY | -0.29012 | 0.10117  | 0.05356  | 0.06636  | 0.00000  |
| 49 | C3 | DXZ | 0.00000  | 0.00000  | 0.00000  | 0.00000  | 0.01080  |
| 50 | C3 | DYZ | 0.00000  | 0.00000  | 0.00000  | 0.00000  | -0.01178 |
| 51 | C4 | S   | 0.00941  | 0.00724  | -0.00239 | -0.02620 | 0.00000  |
| 52 | C4 | S   | 0.24552  | 0.04898  | -0.08888 | -0.18904 | 0.00000  |
| 53 | C4 | PX  | -0.07291 | 0.04056  | -0.11248 | -0.12492 | 0.00000  |
| 54 | C4 | PY  | 0.00246  | -0.04635 | 0.08956  | -0.00635 | 0.00000  |
| 55 | C4 | PZ  | 0.00000  | 0.00000  | 0.00000  | 0.00000  | 0.04257  |
| 56 | C4 | S   | -1.32853 | -0.57112 | -0.11868 | 3.30968  | 0.00000  |
| 57 | C4 | PX  | 0.30213  | 0.27659  | 0.26037  | -0.28252 | 0.00000  |
| 58 | C4 | PY  | 0.69161  | 0.46734  | 0.23824  | -2.29405 | 0.00000  |
| 59 | C4 | PZ  | 0.00000  | 0.00000  | 0.00000  | 0.00000  | -0.13753 |
| 60 | C4 | DXX | -0.18743 | 0.10703  | 0.06213  | -0.17453 | 0.00000  |
| 61 | C4 | DYY | 0.04078  | -0.09526 | 0.05877  | 0.06554  | 0.00000  |
| 62 | C4 | DZZ | 0.15828  | -0.03441 | -0.18690 | 0.17716  | 0.00000  |
| 63 | C4 | DXY | -0.07492 | 0.00646  | -0.03837 | -0.13603 | 0.00000  |
| 64 | C4 | DXZ | 0.00000  | 0.00000  | 0.00000  | 0.00000  | -0.18362 |
| 65 | C4 | DYZ | 0.00000  | 0.00000  | 0.00000  | 0.00000  | 0.11799  |
| 66 | C5 | S   | -0.01443 | -0.00687 | -0.00064 | 0.02126  | 0.00000  |
| 67 | C5 | S   | -0.08980 | -0.22524 | 0.02461  | 0.40460  | 0.00000  |
| 68 | C5 | PX  | 0.09038  | -0.03561 | 0.04777  | 0.08157  | 0.00000  |
| 69 | C5 | PY  | 0.08041  | 0.06799  | -0.00656 | -0.00174 | 0.00000  |
| 70 | C5 | PZ  | 0.00000  | 0.00000  | 0.00000  | 0.00000  | -0.04190 |
| 71 | C5 | S   | 0.74432  | -0.54873 | 0.48183  | -3.72751 | 0.00000  |
| 72 | C5 | PX  | 0.50777  | 0.72587  | -0.45026 | -0.55515 | 0.00000  |
| 73 | C5 | PY  | -1.01402 | -0.07987 | 0.31318  | 2.07201  | 0.00000  |
| 74 | C5 | PZ  | 0.00000  | 0.00000  | 0.00000  | 0.00000  | 0.00538  |
| 75 | C5 | DXX | -0.19453 | 0.11786  | 0.05570  | -0.19663 | 0.00000  |
| 76 | C5 | DYY | 0.05276  | -0.10846 | 0.09304  | 0.09085  | 0.00000  |
| 77 | C5 | DZZ | 0.17750  | -0.01503 | -0.20972 | 0.07726  | 0.00000  |
| 78 | C5 | DXY | 0.03836  | -0.02432 | 0.02769  | 0.06622  | 0.00000  |
| 79 | C5 | DXZ | 0.00000  | 0.00000  | 0.00000  | 0.00000  | -0.11156 |
| 80 | C5 | DYZ | 0.00000  | 0.00000  | 0.00000  | 0.00000  | 0.03737  |
| 81 | C6 | S   | 0.00641  | 0.01221  | -0.00494 | 0.05276  | 0.00000  |
| 82 | C6 | S   | 0.16451  | -0.05527 | -0.35242 | 0.66161  | 0.00000  |
| 83 | C6 | PX  | -0.12965 | 0.20537  | -0.26857 | 0.09216  | 0.00000  |

|     |    |     |          |          |          |          |          |
|-----|----|-----|----------|----------|----------|----------|----------|
| 84  | C6 | PY  | 0.08365  | -0.01071 | 0.10788  | -0.10468 | 0.00000  |
| 85  | C6 | PZ  | 0.00000  | 0.00000  | 0.00000  | 0.00000  | 0.01124  |
| 86  | C6 | S   | 2.85051  | 2.12872  | -0.86057 | -5.96872 | 0.00000  |
| 87  | C6 | PX  | 0.25890  | -3.05906 | 2.60886  | -5.17520 | 0.00000  |
| 88  | C6 | PY  | -2.70575 | -2.76494 | 0.66650  | 1.85488  | 0.00000  |
| 89  | C6 | PZ  | 0.00000  | 0.00000  | 0.00000  | 0.00000  | 0.49251  |
| 90  | C6 | DXX | 0.05860  | 0.07198  | 0.28074  | 0.04098  | 0.00000  |
| 91  | C6 | DYY | -0.05791 | 0.18555  | -0.13358 | 0.02239  | 0.00000  |
| 92  | C6 | DZZ | 0.01835  | -0.35302 | -0.18986 | -0.13657 | 0.00000  |
| 93  | C6 | DXY | 0.30495  | -0.04547 | 0.01114  | 0.03369  | 0.00000  |
| 94  | C6 | DXZ | 0.00000  | 0.00000  | 0.00000  | 0.00000  | 0.27417  |
| 95  | C6 | DYZ | 0.00000  | 0.00000  | 0.00000  | 0.00000  | 0.05174  |
| 96  | C7 | S   | 0.01005  | 0.01926  | -0.01921 | 0.05703  | 0.00000  |
| 97  | C7 | S   | 0.01090  | 0.47443  | -0.49006 | 0.75172  | 0.00000  |
| 98  | C7 | PX  | -0.03988 | -0.01071 | 0.19701  | 0.00807  | 0.00000  |
| 99  | C7 | PY  | 0.08518  | 0.13521  | 0.04986  | 0.09658  | 0.00000  |
| 100 | C7 | PZ  | 0.00000  | 0.00000  | 0.00000  | 0.00000  | -0.02343 |
| 101 | C7 | S   | 0.12954  | -2.28228 | 1.77772  | -8.02278 | 0.00000  |
| 102 | C7 | PX  | 0.67999  | 2.26795  | -1.63238 | 4.65758  | 0.00000  |
| 103 | C7 | PY  | -0.39104 | -1.10446 | 0.28462  | -1.00422 | 0.00000  |
| 104 | C7 | PZ  | 0.00000  | 0.00000  | 0.00000  | 0.00000  | 0.61969  |
| 105 | C7 | DXX | -0.20204 | 0.06739  | 0.17453  | 0.13254  | 0.00000  |
| 106 | C7 | DYY | 0.12064  | 0.01751  | 0.01897  | -0.07171 | 0.00000  |
| 107 | C7 | DZZ | 0.06219  | -0.16725 | -0.18614 | -0.14434 | 0.00000  |
| 108 | C7 | DXY | 0.17287  | 0.05864  | 0.18950  | 0.15017  | 0.00000  |
| 109 | C7 | DXZ | 0.00000  | 0.00000  | 0.00000  | 0.00000  | -0.38225 |
| 110 | C7 | DYZ | 0.00000  | 0.00000  | 0.00000  | 0.00000  | 0.30305  |
| 111 | H3 | S   | -0.04368 | -0.00948 | -0.07350 | 0.24794  | 0.00000  |
| 112 | H3 | S   | -0.12650 | -0.19476 | -0.13505 | 0.50404  | 0.00000  |
| 113 | H3 | PX  | -0.04106 | 0.02859  | -0.01167 | -0.03247 | 0.00000  |
| 114 | H3 | PY  | 0.00068  | -0.00418 | -0.00478 | 0.07307  | 0.00000  |
| 115 | H3 | PZ  | 0.00000  | 0.00000  | 0.00000  | 0.00000  | 0.04617  |
| 116 | H4 | S   | 0.19260  | 0.16807  | -0.17943 | -0.11687 | 0.00000  |
| 117 | H4 | S   | 0.38859  | 0.16689  | -0.23586 | -0.42992 | 0.00000  |
| 118 | H4 | PX  | 0.02671  | -0.02945 | 0.01889  | 0.09042  | 0.00000  |
| 119 | H4 | PY  | 0.03072  | 0.01270  | -0.01598 | 0.02221  | 0.00000  |
| 120 | H4 | PZ  | 0.00000  | 0.00000  | 0.00000  | 0.00000  | 0.05559  |
| 121 | N1 | S   | 0.08565  | 0.08910  | -0.04621 | -0.04225 | 0.00000  |
| 122 | N1 | S   | 0.98045  | 1.33558  | -0.55708 | -0.43248 | 0.00000  |
| 123 | N1 | PX  | 0.03760  | -0.07378 | 0.06332  | 0.03438  | 0.00000  |
| 124 | N1 | PY  | -0.04858 | 0.09316  | -0.02610 | 0.06970  | 0.00000  |
| 125 | N1 | PZ  | 0.00000  | 0.00000  | 0.00000  | 0.00000  | 0.03591  |
| 126 | N1 | S   | -5.81602 | -7.33317 | 2.92395  | 2.48490  | 0.00000  |
| 127 | N1 | PX  | -1.75552 | -1.30076 | 0.23340  | 1.17707  | 0.00000  |
| 128 | N1 | PY  | -0.87967 | -1.51130 | 1.08315  | -1.01133 | 0.00000  |
| 129 | N1 | PZ  | 0.00000  | 0.00000  | 0.00000  | 0.00000  | -0.05002 |
| 130 | N1 | DXX | -0.04603 | 0.30220  | -0.21267 | -0.12999 | 0.00000  |
| 131 | N1 | DYY | 0.29136  | 0.29127  | 0.05850  | -0.02646 | 0.00000  |
| 132 | N1 | DZZ | 0.08141  | -0.22812 | -0.05749 | 0.03002  | 0.00000  |
| 133 | N1 | DXY | -0.14204 | -0.00832 | -0.18790 | 0.11850  | 0.00000  |
| 134 | N1 | DXZ | 0.00000  | 0.00000  | 0.00000  | 0.00000  | 0.03257  |
| 135 | N1 | DYZ | 0.00000  | 0.00000  | 0.00000  | 0.00000  | -0.25047 |
| 136 | H6 | S   | -0.04391 | 0.28008  | -0.09966 | 0.20662  | 0.00000  |
| 137 | H6 | S   | -0.09299 | 0.40225  | -0.10725 | 0.70521  | 0.00000  |

|     |     |     |          |          |          |          |          |
|-----|-----|-----|----------|----------|----------|----------|----------|
| 138 | H6  | PX  | 0.01467  | -0.03041 | -0.00295 | 0.01343  | 0.00000  |
| 139 | H6  | PY  | -0.04319 | 0.09854  | -0.04830 | 0.02880  | 0.00000  |
| 140 | H6  | PZ  | 0.00000  | 0.00000  | 0.00000  | 0.00000  | 0.01216  |
| 141 | C8  | S   | 0.01535  | -0.02285 | 0.01501  | -0.02609 | 0.00000  |
| 142 | C8  | S   | 0.10185  | -0.45272 | -0.08201 | -0.66084 | 0.00000  |
| 143 | C8  | PX  | -0.06922 | 0.09851  | -0.07294 | -0.11374 | 0.00000  |
| 144 | C8  | PY  | -0.11535 | -0.08615 | -0.15752 | -0.19249 | 0.00000  |
| 145 | C8  | PZ  | 0.00000  | 0.00000  | 0.00000  | 0.00000  | -0.02083 |
| 146 | C8  | S   | 0.10001  | 2.77681  | -1.03706 | 2.03453  | 0.00000  |
| 147 | C8  | PX  | -0.94532 | -0.92407 | -0.19404 | 4.09555  | 0.00000  |
| 148 | C8  | PY  | 3.32076  | 2.86887  | -1.47792 | 3.46765  | 0.00000  |
| 149 | C8  | PZ  | 0.00000  | 0.00000  | 0.00000  | 0.00000  | -0.42237 |
| 150 | C8  | DXX | 0.16161  | 0.06673  | 0.29160  | -0.10719 | 0.00000  |
| 151 | C8  | DYY | -0.20008 | 0.08788  | -0.03692 | 0.03962  | 0.00000  |
| 152 | C8  | DZZ | 0.01833  | -0.18769 | -0.34929 | 0.06499  | 0.00000  |
| 153 | C8  | DXY | -0.04592 | 0.00779  | 0.06997  | 0.27434  | 0.00000  |
| 154 | C8  | DXZ | 0.00000  | 0.00000  | 0.00000  | 0.00000  | -0.14863 |
| 155 | C8  | DYZ | 0.00000  | 0.00000  | 0.00000  | 0.00000  | -0.05066 |
| 156 | H8  | S   | 0.09455  | -0.36557 | 0.13298  | -0.28014 | 0.00000  |
| 157 | H8  | S   | -0.40104 | -0.70190 | 0.47527  | -1.06420 | 0.00000  |
| 158 | H8  | PX  | 0.04276  | -0.03650 | 0.07849  | -0.02903 | 0.00000  |
| 159 | H8  | PY  | -0.01062 | 0.06425  | 0.11473  | 0.13709  | 0.00000  |
| 160 | H8  | PZ  | 0.00000  | 0.00000  | 0.00000  | 0.00000  | -0.27918 |
| 161 | C10 | S   | -0.01241 | -0.00095 | -0.01290 | -0.00471 | 0.00000  |
| 162 | C10 | S   | 0.07102  | 0.10602  | -0.11128 | 0.06733  | 0.00000  |
| 163 | C10 | PX  | 0.01299  | -0.00068 | 0.02936  | 0.08789  | 0.00000  |
| 164 | C10 | PY  | 0.25246  | 0.05011  | -0.06122 | 0.11549  | 0.00000  |
| 165 | C10 | PZ  | 0.00000  | 0.00000  | 0.00000  | 0.00000  | -0.00791 |
| 166 | C10 | S   | 2.37426  | 1.10527  | -0.50446 | 2.08001  | 0.00000  |
| 167 | C10 | PX  | 0.65192  | 0.70007  | -0.12220 | -1.78037 | 0.00000  |
| 168 | C10 | PY  | 0.83228  | 0.24483  | -0.38357 | 0.96561  | 0.00000  |
| 169 | C10 | PZ  | 0.00000  | 0.00000  | 0.00000  | 0.00000  | 0.18896  |
| 170 | C10 | DXX | -0.03570 | -0.01033 | 0.19438  | -0.12890 | 0.00000  |
| 171 | C10 | DYY | -0.01321 | 0.03734  | -0.00492 | 0.10434  | 0.00000  |
| 172 | C10 | DZZ | 0.10981  | -0.08323 | -0.23412 | 0.02024  | 0.00000  |
| 173 | C10 | DXY | 0.02910  | 0.02025  | -0.07416 | -0.15968 | 0.00000  |
| 174 | C10 | DXZ | 0.00000  | 0.00000  | 0.00000  | 0.00000  | 0.00696  |
| 175 | C10 | DYZ | 0.00000  | 0.00000  | 0.00000  | 0.00000  | 0.23782  |
| 176 | H16 | S   | -0.13800 | -0.11387 | -0.16503 | 0.19646  | 0.00000  |
| 177 | H16 | S   | -0.15476 | -0.25671 | 0.01037  | 0.61402  | 0.00000  |
| 178 | H16 | PX  | 0.01717  | -0.03017 | -0.02351 | -0.02358 | 0.00000  |
| 179 | H16 | PY  | 0.00567  | -0.01681 | 0.06458  | -0.01869 | 0.00000  |
| 180 | H16 | PZ  | 0.00000  | 0.00000  | 0.00000  | 0.00000  | -0.05896 |
| 181 | H18 | S   | 0.07762  | 0.12394  | -0.11414 | -0.12835 | 0.00000  |
| 182 | H18 | S   | 0.15755  | 0.15685  | -0.09919 | -0.60281 | 0.00000  |
| 183 | H18 | PX  | -0.02789 | 0.00455  | -0.01022 | -0.00583 | 0.00000  |
| 184 | H18 | PY  | 0.01250  | -0.02413 | 0.05826  | -0.09602 | 0.00000  |
| 185 | H18 | PZ  | 0.00000  | 0.00000  | 0.00000  | 0.00000  | -0.07617 |

|              |          |          |          |          |          |
|--------------|----------|----------|----------|----------|----------|
| MO:          | 116      | 117      | 118      | 119      | 120      |
| Eigenvalues: | 2.12691  | 2.14240  | 2.15746  | 2.17372  | 2.19360  |
| (ev):        | 57.87625 | 58.29774 | 58.70737 | 59.15008 | 59.69093 |

A

A

A

A

A

|    |    |     |          |          |          |          |          |
|----|----|-----|----------|----------|----------|----------|----------|
| 1  | H1 | S   | 0.01742  | 0.37347  | -0.09247 | 0.29242  | 0.00000  |
| 2  | H1 | S   | 0.18940  | -0.07792 | -0.20469 | 0.31275  | 0.00000  |
| 3  | H1 | PX  | -0.03467 | 0.13368  | -0.03003 | 0.04406  | 0.00000  |
| 4  | H1 | PY  | 0.00609  | 0.06497  | 0.10831  | 0.10359  | 0.00000  |
| 5  | H1 | PZ  | 0.00000  | 0.00000  | 0.00000  | 0.00000  | 0.09428  |
| 6  | C1 | S   | -0.00392 | 0.01150  | 0.00565  | 0.00135  | 0.00000  |
| 7  | C1 | S   | -0.34964 | -0.01618 | 0.20186  | -0.25968 | 0.00000  |
| 8  | C1 | PX  | 0.19154  | -0.01397 | -0.05269 | 0.09260  | 0.00000  |
| 9  | C1 | PY  | 0.01746  | -0.00701 | 0.02009  | 0.25208  | 0.00000  |
| 10 | C1 | PZ  | 0.00000  | 0.00000  | 0.00000  | 0.00000  | -0.02419 |
| 11 | C1 | S   | 0.53132  | -0.60716 | -0.31334 | -0.22156 | 0.00000  |
| 12 | C1 | PX  | -0.68750 | -0.01928 | 0.73971  | -1.04841 | 0.00000  |
| 13 | C1 | PY  | 0.24403  | 0.23005  | -0.82891 | 0.16925  | 0.00000  |
| 14 | C1 | PZ  | 0.00000  | 0.00000  | 0.00000  | 0.00000  | -0.08162 |
| 15 | C1 | DXX | 0.06965  | -0.35439 | 0.00966  | -0.12429 | 0.00000  |
| 16 | C1 | DYY | -0.01586 | 0.31288  | 0.00692  | 0.11781  | 0.00000  |
| 17 | C1 | DZZ | -0.13378 | 0.07588  | -0.03529 | 0.02712  | 0.00000  |
| 18 | C1 | DXY | -0.14694 | 0.01810  | 0.24457  | 0.06518  | 0.00000  |
| 19 | C1 | DXZ | 0.00000  | 0.00000  | 0.00000  | 0.00000  | 0.11538  |
| 20 | C1 | DYZ | 0.00000  | 0.00000  | 0.00000  | 0.00000  | -0.11178 |
| 21 | C2 | S   | 0.00809  | 0.00334  | -0.02382 | 0.00701  | 0.00000  |
| 22 | C2 | S   | 0.00262  | 0.11543  | -0.16572 | 0.28736  | 0.00000  |
| 23 | C2 | PX  | -0.09164 | 0.09868  | -0.00023 | 0.05482  | 0.00000  |
| 24 | C2 | PY  | -0.07320 | -0.15851 | 0.01481  | -0.07285 | 0.00000  |
| 25 | C2 | PZ  | 0.00000  | 0.00000  | 0.00000  | 0.00000  | -0.03733 |
| 26 | C2 | S   | -0.61206 | 0.05872  | 1.50775  | -0.44557 | 0.00000  |
| 27 | C2 | PX  | -0.19343 | -0.36001 | 1.35445  | -1.35181 | 0.00000  |
| 28 | C2 | PY  | -0.01794 | 0.21352  | 0.68190  | -0.64507 | 0.00000  |
| 29 | C2 | PZ  | 0.00000  | 0.00000  | 0.00000  | 0.00000  | -0.41519 |
| 30 | C2 | DXX | -0.03482 | -0.19342 | 0.20738  | 0.29325  | 0.00000  |
| 31 | C2 | DYY | 0.00613  | 0.11341  | -0.17369 | -0.28698 | 0.00000  |
| 32 | C2 | DZZ | -0.06660 | 0.12154  | 0.00876  | -0.05484 | 0.00000  |
| 33 | C2 | DXY | 0.21095  | 0.10497  | 0.08876  | 0.05256  | 0.00000  |
| 34 | C2 | DXZ | 0.00000  | 0.00000  | 0.00000  | 0.00000  | -0.35859 |
| 35 | C2 | DYZ | 0.00000  | 0.00000  | 0.00000  | 0.00000  | 0.33951  |
| 36 | C3 | S   | 0.00549  | 0.01924  | -0.02721 | 0.02585  | 0.00000  |
| 37 | C3 | S   | 0.03617  | -0.23226 | -0.72101 | 0.52035  | 0.00000  |
| 38 | C3 | PX  | 0.13170  | 0.05421  | 0.10131  | -0.12823 | 0.00000  |
| 39 | C3 | PY  | 0.05849  | -0.19197 | 0.13671  | -0.27018 | 0.00000  |
| 40 | C3 | PZ  | 0.00000  | 0.00000  | 0.00000  | 0.00000  | 0.00471  |
| 41 | C3 | S   | -1.70075 | 0.22412  | 4.65998  | -3.85308 | 0.00000  |
| 42 | C3 | PX  | 0.33738  | 0.32058  | -1.99998 | 2.21387  | 0.00000  |
| 43 | C3 | PY  | 0.87950  | 0.50120  | -2.12411 | 1.95329  | 0.00000  |
| 44 | C3 | PZ  | 0.00000  | 0.00000  | 0.00000  | 0.00000  | -0.17669 |
| 45 | C3 | DXX | 0.07780  | 0.09961  | -0.12605 | -0.07378 | 0.00000  |
| 46 | C3 | DYY | 0.01852  | -0.09379 | 0.14237  | 0.00388  | 0.00000  |
| 47 | C3 | DZZ | -0.14383 | 0.00554  | -0.07304 | 0.05103  | 0.00000  |
| 48 | C3 | DXY | 0.10554  | 0.22235  | -0.01445 | 0.31070  | 0.00000  |
| 49 | C3 | DXZ | 0.00000  | 0.00000  | 0.00000  | 0.00000  | 0.32473  |
| 50 | C3 | DYZ | 0.00000  | 0.00000  | 0.00000  | 0.00000  | -0.01075 |
| 51 | C4 | S   | -0.00215 | 0.00942  | -0.01884 | 0.00609  | 0.00000  |
| 52 | C4 | S   | 0.26979  | -0.13377 | -0.07337 | 0.24136  | 0.00000  |
| 53 | C4 | PX  | -0.19624 | 0.00820  | -0.01559 | -0.17416 | 0.00000  |
| 54 | C4 | PY  | -0.01472 | 0.03865  | -0.05672 | 0.01216  | 0.00000  |

|     |    |     |          |          |          |          |          |
|-----|----|-----|----------|----------|----------|----------|----------|
| 55  | C4 | PZ  | 0.00000  | 0.00000  | 0.00000  | 0.00000  | 0.04163  |
| 56  | C4 | S   | -0.88120 | -0.14615 | 1.70744  | -1.39878 | 0.00000  |
| 57  | C4 | PX  | 0.52862  | -0.18729 | -0.29038 | 0.71316  | 0.00000  |
| 58  | C4 | PY  | 0.66899  | -0.34480 | -0.99117 | 0.70104  | 0.00000  |
| 59  | C4 | PZ  | 0.00000  | 0.00000  | 0.00000  | 0.00000  | 0.12790  |
| 60  | C4 | DXX | -0.24795 | 0.21109  | 0.08239  | -0.05258 | 0.00000  |
| 61  | C4 | DYY | 0.20173  | -0.27708 | -0.04925 | -0.00101 | 0.00000  |
| 62  | C4 | DZZ | 0.02491  | 0.10343  | 0.02468  | 0.05312  | 0.00000  |
| 63  | C4 | DXY | -0.17754 | -0.22174 | 0.16447  | 0.03740  | 0.00000  |
| 64  | C4 | DXZ | 0.00000  | 0.00000  | 0.00000  | 0.00000  | -0.06279 |
| 65  | C4 | DYZ | 0.00000  | 0.00000  | 0.00000  | 0.00000  | -0.14790 |
| 66  | C5 | S   | -0.01365 | 0.01465  | 0.01280  | -0.01362 | 0.00000  |
| 67  | C5 | S   | 0.00029  | -0.14755 | 0.15365  | -0.09149 | 0.00000  |
| 68  | C5 | PX  | 0.21848  | -0.12767 | -0.06284 | -0.09110 | 0.00000  |
| 69  | C5 | PY  | 0.08497  | 0.02004  | -0.00301 | -0.05660 | 0.00000  |
| 70  | C5 | PZ  | 0.00000  | 0.00000  | 0.00000  | 0.00000  | -0.02301 |
| 71  | C5 | S   | 0.83877  | -0.09947 | -2.02405 | 1.93913  | 0.00000  |
| 72  | C5 | PX  | -0.20808 | 0.33478  | -0.34585 | 0.39091  | 0.00000  |
| 73  | C5 | PY  | -0.67340 | -0.08526 | 1.38500  | -0.64102 | 0.00000  |
| 74  | C5 | PZ  | 0.00000  | 0.00000  | 0.00000  | 0.00000  | 0.09400  |
| 75  | C5 | DXX | -0.30394 | 0.09110  | -0.02763 | -0.15004 | 0.00000  |
| 76  | C5 | DYY | 0.23227  | -0.13397 | 0.06291  | 0.21799  | 0.00000  |
| 77  | C5 | DZZ | 0.06641  | 0.04671  | -0.11173 | -0.04758 | 0.00000  |
| 78  | C5 | DXY | 0.15316  | 0.21340  | -0.18267 | -0.18986 | 0.00000  |
| 79  | C5 | DXZ | 0.00000  | 0.00000  | 0.00000  | 0.00000  | -0.21854 |
| 80  | C5 | DYZ | 0.00000  | 0.00000  | 0.00000  | 0.00000  | -0.15366 |
| 81  | C6 | S   | -0.02569 | 0.01226  | 0.01697  | -0.02591 | 0.00000  |
| 82  | C6 | S   | -0.22715 | -0.00046 | 0.58067  | -0.08186 | 0.00000  |
| 83  | C6 | PX  | -0.07954 | -0.06033 | 0.09739  | -0.06689 | 0.00000  |
| 84  | C6 | PY  | 0.13930  | -0.05374 | 0.00043  | 0.15677  | 0.00000  |
| 85  | C6 | PZ  | 0.00000  | 0.00000  | 0.00000  | 0.00000  | 0.10351  |
| 86  | C6 | S   | 1.46429  | 0.41810  | -3.13650 | 2.99920  | 0.00000  |
| 87  | C6 | PX  | 0.51505  | 0.55360  | -2.09176 | 2.20825  | 0.00000  |
| 88  | C6 | PY  | -0.66660 | 0.00133  | 0.02878  | -0.92970 | 0.00000  |
| 89  | C6 | PZ  | 0.00000  | 0.00000  | 0.00000  | 0.00000  | 0.57872  |
| 90  | C6 | DXX | 0.20101  | 0.15533  | 0.06372  | -0.17317 | 0.00000  |
| 91  | C6 | DYY | -0.04649 | -0.18000 | -0.00689 | 0.05773  | 0.00000  |
| 92  | C6 | DZZ | -0.08499 | 0.07934  | -0.10524 | 0.16222  | 0.00000  |
| 93  | C6 | DXY | -0.08923 | 0.05645  | 0.23303  | 0.12527  | 0.00000  |
| 94  | C6 | DXZ | 0.00000  | 0.00000  | 0.00000  | 0.00000  | -0.04558 |
| 95  | C6 | DYZ | 0.00000  | 0.00000  | 0.00000  | 0.00000  | 0.21656  |
| 96  | C7 | S   | -0.02361 | 0.00750  | 0.02363  | -0.00900 | 0.00000  |
| 97  | C7 | S   | 0.10695  | 0.24025  | 0.45916  | -0.21567 | 0.00000  |
| 98  | C7 | PX  | -0.18484 | -0.09256 | -0.00107 | 0.12410  | 0.00000  |
| 99  | C7 | PY  | -0.08839 | 0.12970  | -0.02281 | 0.17401  | 0.00000  |
| 100 | C7 | PZ  | 0.00000  | 0.00000  | 0.00000  | 0.00000  | -0.01998 |
| 101 | C7 | S   | 1.97028  | -0.50443 | -4.71436 | 2.72149  | 0.00000  |
| 102 | C7 | PX  | -0.73801 | 0.40136  | 2.69082  | -1.57631 | 0.00000  |
| 103 | C7 | PY  | 0.56671  | -0.16564 | -0.49673 | -0.00121 | 0.00000  |
| 104 | C7 | PZ  | 0.00000  | 0.00000  | 0.00000  | 0.00000  | -0.12679 |
| 105 | C7 | DXX | 0.08599  | 0.03052  | -0.12921 | 0.28603  | 0.00000  |
| 106 | C7 | DYY | -0.08552 | -0.12816 | 0.12686  | -0.26589 | 0.00000  |
| 107 | C7 | DZZ | 0.03514  | 0.18140  | -0.09698 | -0.00351 | 0.00000  |
| 108 | C7 | DXY | -0.22330 | -0.06705 | -0.13979 | -0.13720 | 0.00000  |



|     |     |     |          |          |          |          |          |
|-----|-----|-----|----------|----------|----------|----------|----------|
| 109 | C7  | DXZ | 0.00000  | 0.00000  | 0.00000  | 0.00000  | 0.18491  |
| 110 | C7  | DYZ | 0.00000  | 0.00000  | 0.00000  | 0.00000  | 0.16215  |
| 111 | H3  | S   | -0.09472 | 0.38468  | 0.02067  | -0.07433 | 0.00000  |
| 112 | H3  | S   | -0.21243 | 0.05024  | 0.25429  | -0.21186 | 0.00000  |
| 113 | H3  | PX  | -0.13832 | 0.09029  | 0.04982  | -0.02045 | 0.00000  |
| 114 | H3  | PY  | 0.05205  | 0.11025  | -0.02312 | -0.00323 | 0.00000  |
| 115 | H3  | PZ  | 0.00000  | 0.00000  | 0.00000  | 0.00000  | -0.13255 |
| 116 | H4  | S   | 0.04142  | 0.24406  | -0.28383 | -0.24050 | 0.00000  |
| 117 | H4  | S   | 0.10287  | 0.02521  | -0.28650 | 0.21856  | 0.00000  |
| 118 | H4  | PX  | 0.12114  | -0.06326 | 0.04123  | 0.07270  | 0.00000  |
| 119 | H4  | PY  | 0.07923  | 0.06054  | -0.09531 | -0.06614 | 0.00000  |
| 120 | H4  | PZ  | 0.00000  | 0.00000  | 0.00000  | 0.00000  | -0.05147 |
| 121 | N1  | S   | 0.00474  | -0.00093 | 0.00161  | 0.01045  | 0.00000  |
| 122 | N1  | S   | 0.07112  | 0.01978  | -0.30916 | 0.40169  | 0.00000  |
| 123 | N1  | PX  | -0.05743 | 0.11547  | -0.15979 | 0.15101  | 0.00000  |
| 124 | N1  | PY  | 0.04102  | 0.06542  | 0.08349  | -0.15864 | 0.00000  |
| 125 | N1  | PZ  | 0.00000  | 0.00000  | 0.00000  | 0.00000  | 0.15189  |
| 126 | N1  | S   | -0.45473 | 0.15445  | 0.48504  | -1.52365 | 0.00000  |
| 127 | N1  | PX  | 0.13288  | -0.22824 | 0.29990  | -0.80015 | 0.00000  |
| 128 | N1  | PY  | 0.01921  | -0.12321 | -0.66607 | 0.28769  | 0.00000  |
| 129 | N1  | PZ  | 0.00000  | 0.00000  | 0.00000  | 0.00000  | -0.44759 |
| 130 | N1  | DXX | 0.28086  | -0.17430 | -0.23286 | -0.15730 | 0.00000  |
| 131 | N1  | DYY | -0.09721 | 0.03841  | 0.17851  | 0.14846  | 0.00000  |
| 132 | N1  | DZZ | -0.16499 | 0.16304  | -0.08410 | 0.05459  | 0.00000  |
| 133 | N1  | DXY | -0.02420 | -0.15196 | -0.20310 | -0.05340 | 0.00000  |
| 134 | N1  | DXZ | 0.00000  | 0.00000  | 0.00000  | 0.00000  | -0.43058 |
| 135 | N1  | DYZ | 0.00000  | 0.00000  | 0.00000  | 0.00000  | -0.22091 |
| 136 | H6  | S   | 0.00199  | 0.10496  | -0.04035 | -0.47999 | 0.00000  |
| 137 | H6  | S   | -0.00285 | -0.18365 | 0.42424  | -0.33064 | 0.00000  |
| 138 | H6  | PX  | 0.01860  | -0.06978 | 0.04534  | 0.14305  | 0.00000  |
| 139 | H6  | PY  | -0.03033 | -0.06997 | -0.03733 | -0.04902 | 0.00000  |
| 140 | H6  | PZ  | 0.00000  | 0.00000  | 0.00000  | 0.00000  | 0.24823  |
| 141 | C8  | S   | -0.00714 | 0.01099  | -0.01823 | 0.00744  | 0.00000  |
| 142 | C8  | S   | -0.06164 | 0.13374  | -0.20046 | 0.19464  | 0.00000  |
| 143 | C8  | PX  | 0.12178  | -0.00514 | 0.05004  | 0.01403  | 0.00000  |
| 144 | C8  | PY  | 0.13915  | 0.03853  | -0.12630 | 0.11751  | 0.00000  |
| 145 | C8  | PZ  | 0.00000  | 0.00000  | 0.00000  | 0.00000  | 0.07447  |
| 146 | C8  | S   | 0.29629  | -0.11715 | 1.06627  | -0.59982 | 0.00000  |
| 147 | C8  | PX  | -0.85610 | 0.45738  | 2.01684  | -1.19381 | 0.00000  |
| 148 | C8  | PY  | -2.12853 | 0.47560  | 2.47951  | -0.63981 | 0.00000  |
| 149 | C8  | PZ  | 0.00000  | 0.00000  | 0.00000  | 0.00000  | 0.40387  |
| 150 | C8  | DXX | -0.23275 | -0.07741 | 0.12867  | -0.04417 | 0.00000  |
| 151 | C8  | DYY | 0.27722  | -0.07699 | -0.08607 | 0.03066  | 0.00000  |
| 152 | C8  | DZZ | -0.09188 | 0.18503  | -0.04986 | -0.00091 | 0.00000  |
| 153 | C8  | DXY | -0.24071 | -0.09728 | -0.24121 | 0.12990  | 0.00000  |
| 154 | C8  | DXZ | 0.00000  | 0.00000  | 0.00000  | 0.00000  | 0.05491  |
| 155 | C8  | DYZ | 0.00000  | 0.00000  | 0.00000  | 0.00000  | -0.03811 |
| 156 | H8  | S   | -0.14094 | -0.08344 | -0.14053 | -0.20652 | 0.00000  |
| 157 | H8  | S   | 0.24746  | -0.08957 | -0.57794 | 0.43288  | 0.00000  |
| 158 | H8  | PX  | -0.04384 | 0.00679  | -0.08487 | -0.04970 | 0.00000  |
| 159 | H8  | PY  | -0.04813 | 0.03092  | -0.09448 | 0.13107  | 0.00000  |
| 160 | H8  | PZ  | 0.00000  | 0.00000  | 0.00000  | 0.00000  | 0.04619  |
| 161 | C10 | S   | 0.00366  | 0.00628  | -0.00850 | 0.00049  | 0.00000  |
| 162 | C10 | S   | -0.14074 | 0.08254  | 0.07620  | -0.00922 | 0.00000  |

|     |     |     |          |          |          |          |          |
|-----|-----|-----|----------|----------|----------|----------|----------|
| 163 | C10 | PX  | -0.07439 | -0.00217 | -0.00904 | 0.00850  | 0.00000  |
| 164 | C10 | PY  | -0.23805 | 0.09220  | 0.16679  | -0.01835 | 0.00000  |
| 165 | C10 | PZ  | 0.00000  | 0.00000  | 0.00000  | 0.00000  | -0.01075 |
| 166 | C10 | S   | -1.57266 | 0.27345  | 1.63386  | -0.34240 | 0.00000  |
| 167 | C10 | PX  | 0.25312  | -0.37596 | -1.12029 | 0.50723  | 0.00000  |
| 168 | C10 | PY  | -0.46002 | 0.16464  | 0.54687  | -0.14582 | 0.00000  |
| 169 | C10 | PZ  | 0.00000  | 0.00000  | 0.00000  | 0.00000  | -0.23190 |
| 170 | C10 | DXX | -0.05174 | -0.06585 | 0.10315  | -0.05855 | 0.00000  |
| 171 | C10 | DYY | 0.08432  | -0.03125 | -0.06578 | 0.05044  | 0.00000  |
| 172 | C10 | DZZ | -0.11644 | 0.15902  | -0.01586 | -0.01150 | 0.00000  |
| 173 | C10 | DXY | 0.22905  | 0.10977  | 0.24681  | -0.08766 | 0.00000  |
| 174 | C10 | DXZ | 0.00000  | 0.00000  | 0.00000  | 0.00000  | -0.03228 |
| 175 | C10 | DYZ | 0.00000  | 0.00000  | 0.00000  | 0.00000  | -0.32286 |
| 176 | H16 | S   | 0.19392  | 0.20750  | 0.31019  | -0.10703 | 0.00000  |
| 177 | H16 | S   | -0.16299 | 0.08095  | 0.25155  | -0.16122 | 0.00000  |
| 178 | H16 | PX  | 0.02709  | 0.05969  | 0.15239  | -0.08540 | 0.00000  |
| 179 | H16 | PY  | -0.07881 | -0.02510 | 0.04458  | -0.04363 | 0.00000  |
| 180 | H16 | PZ  | 0.00000  | 0.00000  | 0.00000  | 0.00000  | 0.09074  |
| 181 | H18 | S   | -0.05963 | -0.08658 | -0.45216 | 0.17999  | 0.00000  |
| 182 | H18 | S   | 0.16481  | -0.09134 | -0.28434 | 0.09645  | 0.00000  |
| 183 | H18 | PX  | 0.10118  | 0.03001  | 0.12667  | -0.05950 | 0.00000  |
| 184 | H18 | PY  | -0.04532 | -0.01909 | -0.00296 | 0.00718  | 0.00000  |
| 185 | H18 | PZ  | 0.00000  | 0.00000  | 0.00000  | 0.00000  | 0.13287  |

|              |          |          |          |          |          |
|--------------|----------|----------|----------|----------|----------|
| M0:          | 121      | 122      | 123      | 124      | 125      |
| Eigenvalues: | 2.24660  | 2.27302  | 2.27957  | 2.28758  | 2.30563  |
| (ev):        | 61.13308 | 61.85196 | 62.03024 | 62.24833 | 62.73932 |

|    |    |     |          |          |          |          |          |
|----|----|-----|----------|----------|----------|----------|----------|
|    |    |     | A        | A        | A        | A        | A        |
| 1  | H1 | S   | -0.04482 | 0.00000  | 0.00000  | -0.31917 | -0.17840 |
| 2  | H1 | S   | 0.05061  | 0.00000  | 0.00000  | -0.04154 | 0.00015  |
| 3  | H1 | PX  | 0.00427  | 0.00000  | 0.00000  | -0.11732 | -0.10293 |
| 4  | H1 | PY  | -0.08468 | 0.00000  | 0.00000  | 0.17058  | -0.03839 |
| 5  | H1 | PZ  | 0.00000  | 0.14686  | -0.28243 | 0.00000  | 0.00000  |
| 6  | C1 | S   | -0.01796 | 0.00000  | 0.00000  | -0.01003 | -0.00436 |
| 7  | C1 | S   | 0.05068  | 0.00000  | 0.00000  | -0.19661 | -0.09140 |
| 8  | C1 | PX  | -0.07968 | 0.00000  | 0.00000  | 0.04517  | 0.07037  |
| 9  | C1 | PY  | 0.00017  | 0.00000  | 0.00000  | 0.03658  | 0.11544  |
| 10 | C1 | PZ  | 0.00000  | 0.02669  | 0.05752  | 0.00000  | 0.00000  |
| 11 | C1 | S   | 0.90026  | 0.00000  | 0.00000  | 0.88039  | -0.64083 |
| 12 | C1 | PX  | -0.23012 | 0.00000  | 0.00000  | 0.25347  | 0.36290  |
| 13 | C1 | PY  | -0.26285 | 0.00000  | 0.00000  | -0.82668 | -0.23861 |
| 14 | C1 | PZ  | 0.00000  | -0.36469 | 0.41287  | 0.00000  | 0.00000  |
| 15 | C1 | DXX | 0.06010  | 0.00000  | 0.00000  | 0.23997  | 0.20338  |
| 16 | C1 | DYY | -0.02342 | 0.00000  | 0.00000  | -0.04159 | -0.02086 |
| 17 | C1 | DZZ | -0.02159 | 0.00000  | 0.00000  | -0.24311 | -0.29187 |
| 18 | C1 | DXY | -0.07037 | 0.00000  | 0.00000  | 0.32532  | -0.09623 |
| 19 | C1 | DXZ | 0.00000  | 0.17301  | -0.30008 | 0.00000  | 0.00000  |
| 20 | C1 | DYZ | 0.00000  | -0.18267 | -0.01078 | 0.00000  | 0.00000  |
| 21 | C2 | S   | -0.01548 | 0.00000  | 0.00000  | 0.01677  | 0.01005  |
| 22 | C2 | S   | 0.10322  | 0.00000  | 0.00000  | 0.17969  | 0.11105  |
| 23 | C2 | PX  | 0.09901  | 0.00000  | 0.00000  | 0.03273  | 0.05506  |
| 24 | C2 | PY  | 0.00002  | 0.00000  | 0.00000  | -0.05623 | 0.12098  |
| 25 | C2 | PZ  | 0.00000  | 0.01243  | 0.04865  | 0.00000  | 0.00000  |

|    |    |     |          |          |          |          |          |
|----|----|-----|----------|----------|----------|----------|----------|
| 26 | C2 | S   | 0.68377  | 0.00000  | 0.00000  | -0.88507 | 0.22192  |
| 27 | C2 | PX  | 0.37682  | 0.00000  | 0.00000  | 0.08817  | 0.48929  |
| 28 | C2 | PY  | -0.10111 | 0.00000  | 0.00000  | 0.71356  | -0.08458 |
| 29 | C2 | PZ  | 0.00000  | 0.56589  | 0.10975  | 0.00000  | 0.00000  |
| 30 | C2 | DXX | -0.01186 | 0.00000  | 0.00000  | -0.26523 | -0.21651 |
| 31 | C2 | DYY | 0.03079  | 0.00000  | 0.00000  | 0.02430  | 0.06114  |
| 32 | C2 | DZZ | 0.00794  | 0.00000  | 0.00000  | 0.30692  | 0.24943  |
| 33 | C2 | DXY | 0.03736  | 0.00000  | 0.00000  | 0.17144  | -0.09673 |
| 34 | C2 | DXZ | 0.00000  | 0.33145  | 0.12661  | 0.00000  | 0.00000  |
| 35 | C2 | DYZ | 0.00000  | 0.17821  | -0.03643 | 0.00000  | 0.00000  |
| 36 | C3 | S   | -0.00381 | 0.00000  | 0.00000  | -0.00888 | -0.00588 |
| 37 | C3 | S   | -0.07604 | 0.00000  | 0.00000  | -0.31704 | -0.04207 |
| 38 | C3 | PX  | 0.14157  | 0.00000  | 0.00000  | 0.17059  | 0.16417  |
| 39 | C3 | PY  | 0.14222  | 0.00000  | 0.00000  | -0.11090 | -0.05280 |
| 40 | C3 | PZ  | 0.00000  | -0.04563 | -0.05181 | 0.00000  | 0.00000  |
| 41 | C3 | S   | -0.01404 | 0.00000  | 0.00000  | -0.26916 | 2.39976  |
| 42 | C3 | PX  | -0.66751 | 0.00000  | 0.00000  | -1.24083 | -0.36528 |
| 43 | C3 | PY  | -0.96341 | 0.00000  | 0.00000  | -0.21593 | -0.83834 |
| 44 | C3 | PZ  | 0.00000  | 0.27051  | -0.18900 | 0.00000  | 0.00000  |
| 45 | C3 | DXX | 0.15854  | 0.00000  | 0.00000  | -0.09624 | -0.00391 |
| 46 | C3 | DYY | -0.13510 | 0.00000  | 0.00000  | 0.25313  | -0.04569 |
| 47 | C3 | DZZ | -0.02006 | 0.00000  | 0.00000  | -0.25164 | 0.13701  |
| 48 | C3 | DXY | -0.08131 | 0.00000  | 0.00000  | -0.05309 | 0.27162  |
| 49 | C3 | DXZ | 0.00000  | 0.01266  | -0.18146 | 0.00000  | 0.00000  |
| 50 | C3 | DYZ | 0.00000  | -0.05159 | -0.24541 | 0.00000  | 0.00000  |
| 51 | C4 | S   | -0.00759 | 0.00000  | 0.00000  | -0.00284 | -0.02078 |
| 52 | C4 | S   | -0.26125 | 0.00000  | 0.00000  | 0.17553  | -0.41889 |
| 53 | C4 | PX  | 0.06120  | 0.00000  | 0.00000  | 0.06775  | 0.00376  |
| 54 | C4 | PY  | 0.11096  | 0.00000  | 0.00000  | -0.16573 | 0.15473  |
| 55 | C4 | PZ  | 0.00000  | 0.03011  | -0.03222 | 0.00000  | 0.00000  |
| 56 | C4 | S   | 0.09369  | 0.00000  | 0.00000  | 0.56127  | 1.47117  |
| 57 | C4 | PX  | -0.09082 | 0.00000  | 0.00000  | -0.18365 | -0.07630 |
| 58 | C4 | PY  | 0.09321  | 0.00000  | 0.00000  | 0.14237  | -0.87487 |
| 59 | C4 | PZ  | 0.00000  | 0.58793  | -0.32698 | 0.00000  | 0.00000  |
| 60 | C4 | DXX | 0.12253  | 0.00000  | 0.00000  | 0.02527  | -0.16250 |
| 61 | C4 | DYY | 0.08054  | 0.00000  | 0.00000  | -0.03955 | 0.34097  |
| 62 | C4 | DZZ | -0.29662 | 0.00000  | 0.00000  | 0.10764  | -0.24973 |
| 63 | C4 | DXY | 0.20023  | 0.00000  | 0.00000  | 0.07111  | 0.14771  |
| 64 | C4 | DXZ | 0.00000  | -0.37428 | -0.07389 | 0.00000  | 0.00000  |
| 65 | C4 | DYZ | 0.00000  | -0.22440 | 0.27931  | 0.00000  | 0.00000  |
| 66 | C5 | S   | -0.00820 | 0.00000  | 0.00000  | 0.01920  | 0.00811  |
| 67 | C5 | S   | -0.26065 | 0.00000  | 0.00000  | 0.17659  | 0.27164  |
| 68 | C5 | PX  | -0.03398 | 0.00000  | 0.00000  | 0.08177  | 0.13530  |
| 69 | C5 | PY  | 0.11784  | 0.00000  | 0.00000  | 0.01648  | -0.04336 |
| 70 | C5 | PZ  | 0.00000  | -0.04997 | -0.01728 | 0.00000  | 0.00000  |
| 71 | C5 | S   | 0.06010  | 0.00000  | 0.00000  | -0.82551 | -0.85701 |
| 72 | C5 | PX  | 0.13812  | 0.00000  | 0.00000  | -0.27631 | -0.49249 |
| 73 | C5 | PY  | -0.00601 | 0.00000  | 0.00000  | 0.05575  | 0.72496  |
| 74 | C5 | PZ  | 0.00000  | -0.69317 | 0.04488  | 0.00000  | 0.00000  |
| 75 | C5 | DXX | 0.17306  | 0.00000  | 0.00000  | -0.12494 | 0.02069  |
| 76 | C5 | DYY | 0.00230  | 0.00000  | 0.00000  | -0.10360 | -0.07550 |
| 77 | C5 | DZZ | -0.25072 | 0.00000  | 0.00000  | 0.23844  | 0.07806  |
| 78 | C5 | DXY | -0.17109 | 0.00000  | 0.00000  | 0.16101  | -0.07419 |
| 79 | C5 | DXZ | 0.00000  | -0.29365 | 0.20294  | 0.00000  | 0.00000  |

|     |    |     |          |          |          |          |          |
|-----|----|-----|----------|----------|----------|----------|----------|
| 80  | C5 | DYZ | 0.00000  | 0.34193  | 0.11716  | 0.00000  | 0.00000  |
| 81  | C6 | S   | 0.00049  | 0.00000  | 0.00000  | 0.00237  | 0.02402  |
| 82  | C6 | S   | -0.06211 | 0.00000  | 0.00000  | 0.12422  | 0.20333  |
| 83  | C6 | PX  | -0.06709 | 0.00000  | 0.00000  | 0.15000  | 0.12658  |
| 84  | C6 | PY  | 0.13244  | 0.00000  | 0.00000  | 0.07795  | -0.01097 |
| 85  | C6 | PZ  | 0.00000  | 0.00732  | -0.03614 | 0.00000  | 0.00000  |
| 86  | C6 | S   | -0.13055 | 0.00000  | 0.00000  | -0.63945 | -0.70144 |
| 87  | C6 | PX  | 0.02455  | 0.00000  | 0.00000  | -1.02720 | -0.54390 |
| 88  | C6 | PY  | -1.18013 | 0.00000  | 0.00000  | 0.86839  | 0.04457  |
| 89  | C6 | PZ  | 0.00000  | -0.36112 | -0.03163 | 0.00000  | 0.00000  |
| 90  | C6 | DXX | 0.14104  | 0.00000  | 0.00000  | 0.10591  | 0.02827  |
| 91  | C6 | DYY | -0.13433 | 0.00000  | 0.00000  | -0.10971 | -0.19631 |
| 92  | C6 | DZZ | -0.02972 | 0.00000  | 0.00000  | 0.03519  | 0.12999  |
| 93  | C6 | DXY | 0.09592  | 0.00000  | 0.00000  | 0.04780  | -0.15114 |
| 94  | C6 | DXZ | 0.00000  | 0.15467  | 0.20742  | 0.00000  | 0.00000  |
| 95  | C6 | DYZ | 0.00000  | -0.08030 | -0.08903 | 0.00000  | 0.00000  |
| 96  | C7 | S   | 0.00370  | 0.00000  | 0.00000  | -0.02091 | 0.02802  |
| 97  | C7 | S   | 0.07099  | 0.00000  | 0.00000  | -0.46971 | 0.43324  |
| 98  | C7 | PX  | -0.07777 | 0.00000  | 0.00000  | 0.22588  | -0.03712 |
| 99  | C7 | PY  | -0.04251 | 0.00000  | 0.00000  | -0.14950 | 0.22072  |
| 100 | C7 | PZ  | 0.00000  | -0.01659 | -0.02955 | 0.00000  | 0.00000  |
| 101 | C7 | S   | -0.35665 | 0.00000  | 0.00000  | 1.06709  | -2.77856 |
| 102 | C7 | PX  | 0.15076  | 0.00000  | 0.00000  | -0.58804 | 1.70973  |
| 103 | C7 | PY  | 0.09820  | 0.00000  | 0.00000  | 0.72667  | -1.22577 |
| 104 | C7 | PZ  | 0.00000  | -0.13610 | -0.18055 | 0.00000  | 0.00000  |
| 105 | C7 | DXX | 0.06858  | 0.00000  | 0.00000  | 0.08549  | 0.12275  |
| 106 | C7 | DYY | -0.01716 | 0.00000  | 0.00000  | 0.01643  | -0.26680 |
| 107 | C7 | DZZ | -0.00336 | 0.00000  | 0.00000  | -0.23913 | 0.13885  |
| 108 | C7 | DXY | 0.07780  | 0.00000  | 0.00000  | -0.14441 | 0.01774  |
| 109 | C7 | DXZ | 0.00000  | 0.09768  | 0.28454  | 0.00000  | 0.00000  |
| 110 | C7 | DYZ | 0.00000  | 0.01494  | 0.35362  | 0.00000  | 0.00000  |
| 111 | H3 | S   | -0.20543 | 0.00000  | 0.00000  | -0.04845 | -0.24530 |
| 112 | H3 | S   | 0.03969  | 0.00000  | 0.00000  | -0.01489 | 0.31529  |
| 113 | H3 | PX  | 0.04110  | 0.00000  | 0.00000  | 0.01280  | -0.16811 |
| 114 | H3 | PY  | -0.12610 | 0.00000  | 0.00000  | 0.01576  | -0.07321 |
| 115 | H3 | PZ  | 0.00000  | -0.31817 | 0.21713  | 0.00000  | 0.00000  |
| 116 | H4 | S   | -0.13578 | 0.00000  | 0.00000  | 0.20091  | -0.08643 |
| 117 | H4 | S   | 0.06720  | 0.00000  | 0.00000  | -0.11430 | -0.23073 |
| 118 | H4 | PX  | -0.05360 | 0.00000  | 0.00000  | 0.00990  | -0.05639 |
| 119 | H4 | PY  | -0.11202 | 0.00000  | 0.00000  | 0.08244  | -0.03054 |
| 120 | H4 | PZ  | 0.00000  | 0.40042  | 0.01069  | 0.00000  | 0.00000  |
| 121 | N1 | S   | -0.00136 | 0.00000  | 0.00000  | -0.01325 | 0.00678  |
| 122 | N1 | S   | 0.07285  | 0.00000  | 0.00000  | -0.03042 | 0.44267  |
| 123 | N1 | PX  | 0.10031  | 0.00000  | 0.00000  | 0.16047  | 0.15563  |
| 124 | N1 | PY  | 0.00017  | 0.00000  | 0.00000  | 0.03366  | 0.20498  |
| 125 | N1 | PZ  | 0.00000  | -0.01118 | 0.05343  | 0.00000  | 0.00000  |
| 126 | N1 | S   | -0.03064 | 0.00000  | 0.00000  | 0.79096  | -1.11553 |
| 127 | N1 | PX  | 0.11571  | 0.00000  | 0.00000  | 0.19695  | -0.50608 |
| 128 | N1 | PY  | -0.40695 | 0.00000  | 0.00000  | -0.02978 | -0.31452 |
| 129 | N1 | PZ  | 0.00000  | 0.10204  | -0.15163 | 0.00000  | 0.00000  |
| 130 | N1 | DXX | -0.04190 | 0.00000  | 0.00000  | -0.12990 | -0.14772 |
| 131 | N1 | DYY | 0.05590  | 0.00000  | 0.00000  | 0.11412  | 0.14137  |
| 132 | N1 | DZZ | 0.03872  | 0.00000  | 0.00000  | 0.02410  | 0.11977  |
| 133 | N1 | DXY | -0.05298 | 0.00000  | 0.00000  | -0.07752 | -0.10783 |

|     |     |     |          |          |          |          |          |
|-----|-----|-----|----------|----------|----------|----------|----------|
| 134 | N1  | DXZ | 0.00000  | 0.01547  | -0.27047 | 0.00000  | 0.00000  |
| 135 | N1  | DYZ | 0.00000  | 0.12359  | 0.22284  | 0.00000  | 0.00000  |
| 136 | H6  | S   | 0.04701  | 0.00000  | 0.00000  | 0.29325  | 0.26285  |
| 137 | H6  | S   | 0.08944  | 0.00000  | 0.00000  | 0.01359  | 0.05487  |
| 138 | H6  | PX  | -0.02698 | 0.00000  | 0.00000  | -0.09563 | -0.10442 |
| 139 | H6  | PY  | -0.05944 | 0.00000  | 0.00000  | -0.04563 | 0.07799  |
| 140 | H6  | PZ  | 0.00000  | -0.30051 | -0.10156 | 0.00000  | 0.00000  |
| 141 | C8  | S   | 0.01993  | 0.00000  | 0.00000  | -0.00226 | 0.00262  |
| 142 | C8  | S   | -0.13174 | 0.00000  | 0.00000  | -0.04224 | 0.03940  |
| 143 | C8  | PX  | -0.03462 | 0.00000  | 0.00000  | 0.11543  | 0.00608  |
| 144 | C8  | PY  | 0.30904  | 0.00000  | 0.00000  | 0.06866  | -0.15362 |
| 145 | C8  | PZ  | 0.00000  | 0.01170  | 0.09928  | 0.00000  | 0.00000  |
| 146 | C8  | S   | -0.05569 | 0.00000  | 0.00000  | -0.43860 | 0.94869  |
| 147 | C8  | PX  | 0.50405  | 0.00000  | 0.00000  | 0.04533  | 0.53344  |
| 148 | C8  | PY  | -1.64793 | 0.00000  | 0.00000  | -0.41818 | 2.07394  |
| 149 | C8  | PZ  | 0.00000  | 0.09768  | 0.48173  | 0.00000  | 0.00000  |
| 150 | C8  | DXX | -0.19448 | 0.00000  | 0.00000  | 0.01370  | 0.01477  |
| 151 | C8  | DYY | 0.09712  | 0.00000  | 0.00000  | 0.02139  | -0.14185 |
| 152 | C8  | DZZ | 0.04365  | 0.00000  | 0.00000  | -0.07637 | 0.19988  |
| 153 | C8  | DXY | 0.04008  | 0.00000  | 0.00000  | 0.14712  | 0.05275  |
| 154 | C8  | DXZ | 0.00000  | 0.10355  | 0.13947  | 0.00000  | 0.00000  |
| 155 | C8  | DYZ | 0.00000  | -0.00723 | -0.08979 | 0.00000  | 0.00000  |
| 156 | H8  | S   | 0.01592  | 0.00000  | 0.00000  | -0.07377 | -0.20786 |
| 157 | H8  | S   | -0.02668 | 0.00000  | 0.00000  | 0.29858  | -0.50466 |
| 158 | H8  | PX  | 0.00318  | 0.00000  | 0.00000  | -0.10963 | -0.02524 |
| 159 | H8  | PY  | -0.02693 | 0.00000  | 0.00000  | -0.03831 | 0.12481  |
| 160 | H8  | PZ  | 0.00000  | 0.06640  | 0.17044  | 0.00000  | 0.00000  |
| 161 | C10 | S   | 0.01585  | 0.00000  | 0.00000  | -0.00163 | 0.00407  |
| 162 | C10 | S   | 0.06933  | 0.00000  | 0.00000  | -0.00954 | 0.13109  |
| 163 | C10 | PX  | 0.00707  | 0.00000  | 0.00000  | -0.05732 | 0.06234  |
| 164 | C10 | PY  | -0.04666 | 0.00000  | 0.00000  | -0.00288 | 0.14745  |
| 165 | C10 | PZ  | 0.00000  | -0.00347 | -0.03266 | 0.00000  | 0.00000  |
| 166 | C10 | S   | -1.39816 | 0.00000  | 0.00000  | -0.15692 | 1.12298  |
| 167 | C10 | PX  | -0.28673 | 0.00000  | 0.00000  | 0.42683  | -0.53078 |
| 168 | C10 | PY  | 0.09852  | 0.00000  | 0.00000  | 0.08794  | 0.12259  |
| 169 | C10 | PZ  | 0.00000  | -0.05135 | -0.29087 | 0.00000  | 0.00000  |
| 170 | C10 | DXX | -0.48807 | 0.00000  | 0.00000  | -0.13303 | 0.14170  |
| 171 | C10 | DYY | 0.24839  | 0.00000  | 0.00000  | 0.09752  | -0.15573 |
| 172 | C10 | DZZ | 0.33398  | 0.00000  | 0.00000  | 0.04809  | 0.02706  |
| 173 | C10 | DXY | 0.07743  | 0.00000  | 0.00000  | -0.19936 | 0.06428  |
| 174 | C10 | DXZ | 0.00000  | 0.00024  | -0.02430 | 0.00000  | 0.00000  |
| 175 | C10 | DYZ | 0.00000  | -0.05959 | -0.36960 | 0.00000  | 0.00000  |
| 176 | H16 | S   | 0.39242  | 0.00000  | 0.00000  | -0.14073 | 0.06803  |
| 177 | H16 | S   | 0.13277  | 0.00000  | 0.00000  | -0.07143 | 0.09161  |
| 178 | H16 | PX  | -0.02258 | 0.00000  | 0.00000  | -0.16301 | 0.12777  |
| 179 | H16 | PY  | -0.27421 | 0.00000  | 0.00000  | -0.14095 | 0.18607  |
| 180 | H16 | PZ  | 0.00000  | 0.00826  | 0.12752  | 0.00000  | 0.00000  |
| 181 | H18 | S   | 0.28862  | 0.00000  | 0.00000  | 0.26943  | -0.21006 |
| 182 | H18 | S   | -0.05124 | 0.00000  | 0.00000  | 0.11380  | -0.22681 |
| 183 | H18 | PX  | 0.02691  | 0.00000  | 0.00000  | -0.13227 | 0.06830  |
| 184 | H18 | PY  | -0.30189 | 0.00000  | 0.00000  | 0.00567  | 0.01707  |
| 185 | H18 | PZ  | 0.00000  | 0.03918  | 0.18883  | 0.00000  | 0.00000  |

MO:

126

127

128

129

130

|              |          |          |          |          |          |
|--------------|----------|----------|----------|----------|----------|
| Eigenvalues: | 2.31922  | 2.35383  | 2.39048  | 2.39593  | 2.43253  |
| (ev):        | 63.10911 | 64.05112 | 65.04840 | 65.19658 | 66.19258 |

|    |    | A   | A        | A        | A        | A        |          |
|----|----|-----|----------|----------|----------|----------|----------|
| 1  | H1 | S   | 0.02400  | -0.05257 | -0.06064 | 0.07386  | -0.07682 |
| 2  | H1 | S   | -0.04584 | -0.31394 | 0.07346  | -0.04732 | -0.03608 |
| 3  | H1 | PX  | 0.00933  | 0.01852  | -0.03702 | 0.01199  | -0.05109 |
| 4  | H1 | PY  | 0.00777  | 0.09691  | -0.20188 | -0.19909 | -0.06050 |
| 5  | H1 | PZ  | 0.00000  | 0.00000  | 0.00000  | 0.00000  | 0.00000  |
| 6  | C1 | S   | 0.01541  | 0.02509  | -0.01714 | -0.00773 | 0.00557  |
| 7  | C1 | S   | 0.14187  | 0.52236  | -0.16112 | -0.03293 | -0.04459 |
| 8  | C1 | PX  | -0.04063 | -0.20445 | 0.07104  | 0.06300  | 0.04492  |
| 9  | C1 | PY  | 0.05785  | 0.11613  | -0.26290 | -0.15749 | -0.02599 |
| 10 | C1 | PZ  | 0.00000  | 0.00000  | 0.00000  | 0.00000  | 0.00000  |
| 11 | C1 | S   | -1.08849 | -1.31710 | 0.49038  | -0.29791 | -1.10412 |
| 12 | C1 | PX  | 0.29685  | 1.15189  | -0.23893 | 0.06825  | 0.40258  |
| 13 | C1 | PY  | 0.56297  | 0.14357  | 0.65664  | 0.31447  | 0.35839  |
| 14 | C1 | PZ  | 0.00000  | 0.00000  | 0.00000  | 0.00000  | 0.00000  |
| 15 | C1 | DXX | -0.00962 | -0.04746 | 0.10253  | -0.04166 | 0.05896  |
| 16 | C1 | DYY | -0.07044 | -0.12826 | -0.02700 | 0.06460  | 0.01252  |
| 17 | C1 | DZZ | 0.14106  | 0.28220  | -0.17228 | -0.10957 | -0.14487 |
| 18 | C1 | DXY | -0.09582 | 0.06214  | -0.09287 | -0.24729 | 0.06128  |
| 19 | C1 | DXZ | 0.00000  | 0.00000  | 0.00000  | 0.00000  | 0.00000  |
| 20 | C1 | DYZ | 0.00000  | 0.00000  | 0.00000  | 0.00000  | 0.00000  |
| 21 | C2 | S   | 0.02783  | 0.01446  | -0.01074 | -0.00111 | 0.00956  |
| 22 | C2 | S   | 0.41721  | 0.28022  | -0.10279 | 0.08687  | -0.12014 |
| 23 | C2 | PX  | 0.14917  | 0.06111  | -0.02587 | 0.09779  | -0.10106 |
| 24 | C2 | PY  | 0.09296  | 0.07419  | -0.30445 | 0.00122  | -0.03221 |
| 25 | C2 | PZ  | 0.00000  | 0.00000  | 0.00000  | 0.00000  | 0.00000  |
| 26 | C2 | S   | -1.21524 | -1.37794 | 0.82655  | 0.83701  | -0.62052 |
| 27 | C2 | PX  | -1.49807 | -0.24806 | 0.75570  | 0.40278  | -0.14514 |
| 28 | C2 | PY  | -0.65051 | 0.85151  | 1.30602  | 0.42939  | 0.36493  |
| 29 | C2 | PZ  | 0.00000  | 0.00000  | 0.00000  | 0.00000  | 0.00000  |
| 30 | C2 | DXX | -0.02978 | -0.16804 | -0.00017 | 0.09507  | -0.03407 |
| 31 | C2 | DYY | -0.15868 | 0.03977  | -0.05175 | -0.15157 | -0.03393 |
| 32 | C2 | DZZ | 0.29599  | 0.19430  | 0.01608  | 0.13582  | 0.03926  |
| 33 | C2 | DXY | -0.23722 | 0.28047  | 0.16681  | -0.11645 | 0.05017  |
| 34 | C2 | DXZ | 0.00000  | 0.00000  | 0.00000  | 0.00000  | 0.00000  |
| 35 | C2 | DYZ | 0.00000  | 0.00000  | 0.00000  | 0.00000  | 0.00000  |
| 36 | C3 | S   | 0.00913  | 0.01098  | -0.01259 | -0.01486 | 0.02077  |
| 37 | C3 | S   | 0.24403  | 0.01868  | 0.18534  | -0.24254 | 0.30393  |
| 38 | C3 | PX  | 0.01265  | 0.11396  | -0.10762 | 0.08807  | -0.25064 |
| 39 | C3 | PY  | -0.18585 | -0.18140 | 0.02728  | 0.18544  | -0.14087 |
| 40 | C3 | PZ  | 0.00000  | 0.00000  | 0.00000  | 0.00000  | 0.00000  |
| 41 | C3 | S   | -1.89903 | 1.75029  | 1.60294  | 2.24348  | 0.83156  |
| 42 | C3 | PX  | 1.25809  | -0.32136 | 0.06378  | -0.81245 | 1.16067  |
| 43 | C3 | PY  | 1.64478  | 0.68957  | -0.93609 | -0.90895 | 0.40005  |
| 44 | C3 | PZ  | 0.00000  | 0.00000  | 0.00000  | 0.00000  | 0.00000  |
| 45 | C3 | DXX | 0.08783  | 0.01466  | -0.19564 | -0.00535 | -0.33302 |
| 46 | C3 | DYY | 0.00745  | -0.12969 | 0.10616  | -0.00638 | 0.04717  |
| 47 | C3 | DZZ | -0.02410 | 0.22636  | 0.11949  | 0.04114  | 0.35293  |
| 48 | C3 | DXY | -0.04897 | -0.05979 | -0.19475 | -0.02991 | 0.13904  |
| 49 | C3 | DXZ | 0.00000  | 0.00000  | 0.00000  | 0.00000  | 0.00000  |
| 50 | C3 | DYZ | 0.00000  | 0.00000  | 0.00000  | 0.00000  | 0.00000  |

|     |    |     |          |          |          |          |          |
|-----|----|-----|----------|----------|----------|----------|----------|
| 51  | C4 | S   | 0.02085  | 0.00570  | -0.01888 | -0.01079 | -0.01029 |
| 52  | C4 | S   | 0.09585  | -0.02400 | -0.31732 | -0.34192 | -0.14514 |
| 53  | C4 | PX  | 0.02415  | 0.09411  | 0.14552  | 0.00457  | 0.05234  |
| 54  | C4 | PY  | -0.00834 | -0.06861 | 0.09867  | 0.18359  | 0.02251  |
| 55  | C4 | PZ  | 0.00000  | 0.00000  | 0.00000  | 0.00000  | 0.00000  |
| 56  | C4 | S   | -0.48859 | 0.70809  | -0.17340 | 0.19611  | 0.62837  |
| 57  | C4 | PX  | 0.04976  | -0.55949 | -0.58027 | 0.04394  | -0.29873 |
| 58  | C4 | PY  | 0.00883  | -0.03066 | -0.44495 | -0.99697 | -0.57597 |
| 59  | C4 | PZ  | 0.00000  | 0.00000  | 0.00000  | 0.00000  | 0.00000  |
| 60  | C4 | DXX | -0.10444 | 0.08206  | 0.22574  | 0.00835  | 0.03779  |
| 61  | C4 | DYY | -0.08095 | -0.09310 | 0.00536  | 0.09050  | 0.04638  |
| 62  | C4 | DZZ | 0.21997  | 0.07468  | -0.29487 | -0.18298 | -0.04493 |
| 63  | C4 | DXY | 0.00732  | 0.27027  | -0.19972 | -0.14265 | -0.11300 |
| 64  | C4 | DXZ | 0.00000  | 0.00000  | 0.00000  | 0.00000  | 0.00000  |
| 65  | C4 | DYZ | 0.00000  | 0.00000  | 0.00000  | 0.00000  | 0.00000  |
| 66  | C5 | S   | 0.02145  | 0.00693  | -0.00677 | 0.00633  | -0.00055 |
| 67  | C5 | S   | 0.39117  | -0.26055 | -0.15859 | 0.18875  | 0.04355  |
| 68  | C5 | PX  | -0.05476 | -0.01853 | -0.14620 | -0.07951 | -0.05666 |
| 69  | C5 | PY  | -0.25976 | 0.16931  | 0.06819  | -0.12790 | -0.03783 |
| 70  | C5 | PZ  | 0.00000  | 0.00000  | 0.00000  | 0.00000  | 0.00000  |
| 71  | C5 | S   | 0.74738  | -0.41822 | -1.37862 | -0.85248 | -0.41350 |
| 72  | C5 | PX  | 0.18539  | 0.04232  | 0.48132  | 0.43036  | -0.18110 |
| 73  | C5 | PY  | 0.10243  | -0.29387 | 0.22279  | 1.03334  | 0.12138  |
| 74  | C5 | PZ  | 0.00000  | 0.00000  | 0.00000  | 0.00000  | 0.00000  |
| 75  | C5 | DXX | 0.04592  | -0.01080 | 0.16479  | 0.15028  | -0.01858 |
| 76  | C5 | DYY | -0.29155 | 0.03579  | -0.01628 | -0.16996 | 0.08793  |
| 77  | C5 | DZZ | 0.42176  | -0.09298 | -0.22356 | 0.05355  | -0.08788 |
| 78  | C5 | DXY | -0.07494 | -0.11394 | 0.25368  | -0.06913 | 0.14311  |
| 79  | C5 | DXZ | 0.00000  | 0.00000  | 0.00000  | 0.00000  | 0.00000  |
| 80  | C5 | DYZ | 0.00000  | 0.00000  | 0.00000  | 0.00000  | 0.00000  |
| 81  | C6 | S   | -0.00275 | 0.01497  | 0.00102  | 0.00392  | 0.02227  |
| 82  | C6 | S   | -0.31696 | 0.23902  | 0.39062  | 0.26287  | 0.44458  |
| 83  | C6 | PX  | -0.04718 | -0.01933 | 0.19040  | 0.04526  | 0.22778  |
| 84  | C6 | PY  | -0.19022 | -0.03060 | 0.16287  | -0.11937 | -0.05308 |
| 85  | C6 | PZ  | 0.00000  | 0.00000  | 0.00000  | 0.00000  | 0.00000  |
| 86  | C6 | S   | 0.30953  | 0.17929  | 0.09572  | -0.80912 | -0.17304 |
| 87  | C6 | PX  | 1.55183  | -1.14658 | -1.29488 | -1.19125 | -0.37864 |
| 88  | C6 | PY  | 2.01923  | 0.82293  | -0.95835 | -0.28778 | 1.31706  |
| 89  | C6 | PZ  | 0.00000  | 0.00000  | 0.00000  | 0.00000  | 0.00000  |
| 90  | C6 | DXX | -0.06883 | 0.19275  | -0.25249 | 0.01317  | -0.21232 |
| 91  | C6 | DYY | 0.06383  | -0.22362 | 0.09199  | 0.07471  | -0.03687 |
| 92  | C6 | DZZ | 0.07968  | 0.15253  | 0.13844  | -0.12049 | 0.31688  |
| 93  | C6 | DXY | 0.07126  | 0.01424  | 0.24987  | 0.25484  | -0.17436 |
| 94  | C6 | DXZ | 0.00000  | 0.00000  | 0.00000  | 0.00000  | 0.00000  |
| 95  | C6 | DYZ | 0.00000  | 0.00000  | 0.00000  | 0.00000  | 0.00000  |
| 96  | C7 | S   | -0.02066 | 0.01017  | 0.00725  | 0.01110  | 0.00887  |
| 97  | C7 | S   | -0.41745 | 0.33353  | -0.07702 | 0.40147  | 0.04599  |
| 98  | C7 | PX  | 0.10627  | -0.11130 | 0.07795  | -0.14995 | 0.11629  |
| 99  | C7 | PY  | -0.04701 | -0.01796 | -0.12664 | -0.10712 | 0.14140  |
| 100 | C7 | PZ  | 0.00000  | 0.00000  | 0.00000  | 0.00000  | 0.00000  |
| 101 | C7 | S   | 2.29039  | -0.92377 | -1.61896 | -2.32243 | -0.70336 |
| 102 | C7 | PX  | -1.60818 | 0.69152  | 0.78896  | 1.41184  | -0.04463 |
| 103 | C7 | PY  | 0.31636  | -0.31305 | -0.34553 | 0.15615  | -1.02757 |
| 104 | C7 | PZ  | 0.00000  | 0.00000  | 0.00000  | 0.00000  | 0.00000  |

|     |    |     |          |          |          |          |          |
|-----|----|-----|----------|----------|----------|----------|----------|
| 105 | C7 | DXX | 0.21210  | 0.04282  | 0.10907  | -0.01716 | -0.08488 |
| 106 | C7 | DYY | -0.11453 | -0.16292 | -0.10606 | -0.02805 | 0.06059  |
| 107 | C7 | DZZ | -0.09331 | 0.12066  | -0.16117 | -0.00315 | 0.06117  |
| 108 | C7 | DXY | 0.02784  | 0.05380  | -0.10418 | -0.21424 | 0.20934  |
| 109 | C7 | DXZ | 0.00000  | 0.00000  | 0.00000  | 0.00000  | 0.00000  |
| 110 | C7 | DYZ | 0.00000  | 0.00000  | 0.00000  | 0.00000  | 0.00000  |
| 111 | H3 | S   | 0.08320  | -0.09223 | 0.17524  | 0.14219  | 0.09092  |
| 112 | H3 | S   | -0.01458 | 0.08536  | 0.19694  | 0.26734  | 0.17310  |
| 113 | H3 | PX  | -0.01473 | 0.20077  | 0.05305  | -0.11494 | 0.00039  |
| 114 | H3 | PY  | 0.01876  | -0.14206 | 0.01868  | 0.04450  | 0.04701  |
| 115 | H3 | PZ  | 0.00000  | 0.00000  | 0.00000  | 0.00000  | 0.00000  |
| 116 | H4 | S   | 0.08638  | -0.02484 | 0.20490  | -0.03144 | 0.02168  |
| 117 | H4 | S   | -0.10082 | 0.14372  | 0.03747  | -0.18459 | -0.06340 |
| 118 | H4 | PX  | -0.18089 | 0.00818  | -0.07559 | -0.19787 | 0.02458  |
| 119 | H4 | PY  | -0.01371 | -0.08526 | 0.02024  | -0.09209 | 0.03058  |
| 120 | H4 | PZ  | 0.00000  | 0.00000  | 0.00000  | 0.00000  | 0.00000  |
| 121 | N1 | S   | -0.02206 | 0.00619  | 0.01170  | 0.00431  | 0.02078  |
| 122 | N1 | S   | -0.47109 | 0.19503  | 0.31108  | -0.19741 | -0.06058 |
| 123 | N1 | PX  | -0.05830 | 0.02661  | 0.06649  | -0.12635 | -0.21449 |
| 124 | N1 | PY  | -0.14845 | 0.06885  | -0.23384 | -0.04801 | 0.27645  |
| 125 | N1 | PZ  | 0.00000  | 0.00000  | 0.00000  | 0.00000  | 0.00000  |
| 126 | N1 | S   | 2.30604  | -0.73146 | -1.67926 | -0.02480 | -0.66271 |
| 127 | N1 | PX  | 0.32939  | -0.07045 | -0.40807 | 0.22311  | -0.27427 |
| 128 | N1 | PY  | 1.10545  | -0.19937 | -0.07041 | -0.69503 | 0.33324  |
| 129 | N1 | PZ  | 0.00000  | 0.00000  | 0.00000  | 0.00000  | 0.00000  |
| 130 | N1 | DXX | -0.08537 | 0.24012  | -0.04279 | -0.10770 | 0.03914  |
| 131 | N1 | DYY | 0.02630  | -0.16779 | 0.09447  | 0.01971  | 0.03974  |
| 132 | N1 | DZZ | -0.03706 | -0.01450 | -0.06559 | -0.01765 | -0.07079 |
| 133 | N1 | DXY | -0.05662 | 0.01838  | 0.10273  | -0.08063 | -0.12073 |
| 134 | N1 | DXZ | 0.00000  | 0.00000  | 0.00000  | 0.00000  | 0.00000  |
| 135 | N1 | DYZ | 0.00000  | 0.00000  | 0.00000  | 0.00000  | 0.00000  |
| 136 | H6 | S   | -0.14285 | 0.18737  | 0.09316  | -0.04003 | 0.02647  |
| 137 | H6 | S   | -0.43687 | -0.02819 | 0.20793  | 0.11789  | -0.02266 |
| 138 | H6 | PX  | -0.02008 | -0.06582 | 0.01133  | -0.00326 | 0.01162  |
| 139 | H6 | PY  | 0.20070  | -0.11082 | -0.21931 | 0.09720  | -0.09248 |
| 140 | H6 | PZ  | 0.00000  | 0.00000  | 0.00000  | 0.00000  | 0.00000  |
| 141 | C8 | S   | -0.01204 | -0.02153 | -0.01785 | -0.01207 | -0.02407 |
| 142 | C8 | S   | -0.28035 | -0.27247 | -0.04869 | -0.05461 | -0.46380 |
| 143 | C8 | PX  | -0.05877 | 0.00896  | -0.03473 | 0.05447  | -0.00188 |
| 144 | C8 | PY  | 0.04043  | -0.12702 | 0.04173  | 0.00996  | -0.03020 |
| 145 | C8 | PZ  | 0.00000  | 0.00000  | 0.00000  | 0.00000  | 0.00000  |
| 146 | C8 | S   | -1.12274 | 0.36080  | 0.86075  | 0.59126  | -0.24972 |
| 147 | C8 | PX  | -0.42600 | -0.02173 | 0.35245  | 0.96761  | -0.97526 |
| 148 | C8 | PY  | -0.16512 | 1.83608  | 0.82854  | 0.78784  | 3.01895  |
| 149 | C8 | PZ  | 0.00000  | 0.00000  | 0.00000  | 0.00000  | 0.00000  |
| 150 | C8 | DXX | -0.01494 | -0.22312 | -0.07463 | -0.12076 | 0.41130  |
| 151 | C8 | DYY | 0.17087  | 0.19206  | 0.09888  | 0.08271  | -0.14758 |
| 152 | C8 | DZZ | -0.31549 | -0.07992 | -0.06138 | 0.03569  | -0.40430 |
| 153 | C8 | DXY | 0.00468  | -0.06574 | 0.18156  | -0.22495 | -0.25645 |
| 154 | C8 | DXZ | 0.00000  | 0.00000  | 0.00000  | 0.00000  | 0.00000  |
| 155 | C8 | DYZ | 0.00000  | 0.00000  | 0.00000  | 0.00000  | 0.00000  |
| 156 | H8 | S   | -0.00683 | -0.02211 | -0.17593 | -0.12102 | 0.12301  |
| 157 | H8 | S   | 0.48318  | -0.20710 | -0.11012 | -0.21648 | -0.11692 |
| 158 | H8 | PX  | 0.02559  | 0.04123  | -0.12540 | -0.07168 | 0.17889  |



|     |     |     |          |          |          |          |          |
|-----|-----|-----|----------|----------|----------|----------|----------|
| 159 | H8  | PY  | 0.12029  | 0.12606  | 0.01057  | -0.01186 | 0.25853  |
| 160 | H8  | PZ  | 0.00000  | 0.00000  | 0.00000  | 0.00000  | 0.00000  |
| 161 | C10 | S   | -0.02448 | -0.03219 | -0.01673 | -0.00978 | -0.01561 |
| 162 | C10 | S   | -0.18592 | -0.25379 | -0.13278 | -0.07382 | 0.12045  |
| 163 | C10 | PX  | 0.06649  | -0.03584 | 0.08469  | -0.14618 | -0.01506 |
| 164 | C10 | PY  | -0.07453 | -0.04572 | -0.05343 | 0.01048  | 0.24608  |
| 165 | C10 | PZ  | 0.00000  | 0.00000  | 0.00000  | 0.00000  | 0.00000  |
| 166 | C10 | S   | 0.54539  | 1.77216  | 0.66947  | 0.64729  | 2.19298  |
| 167 | C10 | PX  | -0.30641 | 0.24452  | -0.54573 | 0.31784  | 0.64563  |
| 168 | C10 | PY  | 0.49994  | 0.51108  | 0.22594  | 0.16616  | 1.04027  |
| 169 | C10 | PZ  | 0.00000  | 0.00000  | 0.00000  | 0.00000  | 0.00000  |
| 170 | C10 | DXX | -0.07704 | 0.14169  | 0.08127  | 0.04032  | -0.15750 |
| 171 | C10 | DYY | 0.23769  | 0.16417  | 0.06866  | 0.04873  | 0.21358  |
| 172 | C10 | DZZ | -0.25143 | -0.50481 | -0.26853 | -0.14861 | 0.01614  |
| 173 | C10 | DXY | 0.22302  | -0.03133 | 0.05028  | -0.10974 | 0.10035  |
| 174 | C10 | DXZ | 0.00000  | 0.00000  | 0.00000  | 0.00000  | 0.00000  |
| 175 | C10 | DYZ | 0.00000  | 0.00000  | 0.00000  | 0.00000  | 0.00000  |
| 176 | H16 | S   | 0.16515  | -0.23791 | 0.01802  | -0.15587 | 0.00165  |
| 177 | H16 | S   | 0.11264  | -0.10088 | 0.20543  | -0.16491 | -0.21629 |
| 178 | H16 | PX  | 0.10756  | -0.12417 | 0.12222  | -0.31587 | -0.10020 |
| 179 | H16 | PY  | 0.01440  | 0.02260  | 0.22389  | -0.29841 | -0.30303 |
| 180 | H16 | PZ  | 0.00000  | 0.00000  | 0.00000  | 0.00000  | 0.00000  |
| 181 | H18 | S   | -0.19514 | -0.14546 | -0.19796 | 0.03833  | 0.06204  |
| 182 | H18 | S   | -0.04439 | 0.05447  | -0.21438 | 0.15366  | 0.26595  |
| 183 | H18 | PX  | 0.18927  | -0.00521 | 0.16114  | -0.22896 | -0.05106 |
| 184 | H18 | PY  | -0.22599 | 0.18817  | -0.14073 | 0.40441  | -0.02772 |
| 185 | H18 | PZ  | 0.00000  | 0.00000  | 0.00000  | 0.00000  | 0.00000  |

|              |          |          |          |          |          |
|--------------|----------|----------|----------|----------|----------|
| MO:          | 131      | 132      | 133      | 134      | 135      |
| Eigenvalues: | 2.43724  | 2.52134  | 2.52181  | 2.56069  | 2.61248  |
| (ev):        | 66.32070 | 68.60917 | 68.62186 | 69.68007 | 71.08919 |

|    |    | A   | A        | A        | A        | A        |          |
|----|----|-----|----------|----------|----------|----------|----------|
| 1  | H1 | S   | 0.00000  | 0.00000  | 0.00933  | 0.00000  | 0.00000  |
| 2  | H1 | S   | 0.00000  | 0.00000  | -0.11783 | 0.00000  | 0.00000  |
| 3  | H1 | PX  | 0.00000  | 0.00000  | 0.05784  | 0.00000  | 0.00000  |
| 4  | H1 | PY  | 0.00000  | 0.00000  | -0.07784 | 0.00000  | 0.00000  |
| 5  | H1 | PZ  | -0.13363 | 0.21529  | 0.00000  | -0.23467 | 0.18022  |
| 6  | C1 | S   | 0.00000  | 0.00000  | -0.02962 | 0.00000  | 0.00000  |
| 7  | C1 | S   | 0.00000  | 0.00000  | -0.15863 | 0.00000  | 0.00000  |
| 8  | C1 | PX  | 0.00000  | 0.00000  | 0.05661  | 0.00000  | 0.00000  |
| 9  | C1 | PY  | 0.00000  | 0.00000  | -0.10649 | 0.00000  | 0.00000  |
| 10 | C1 | PZ  | -0.01006 | -0.10910 | 0.00000  | 0.04925  | -0.04378 |
| 11 | C1 | S   | 0.00000  | 0.00000  | 0.09679  | 0.00000  | 0.00000  |
| 12 | C1 | PX  | 0.00000  | 0.00000  | 0.26863  | 0.00000  | 0.00000  |
| 13 | C1 | PY  | 0.00000  | 0.00000  | -1.02837 | 0.00000  | 0.00000  |
| 14 | C1 | PZ  | 0.04275  | -0.11954 | 0.00000  | 0.11144  | -0.00725 |
| 15 | C1 | DXX | 0.00000  | 0.00000  | -0.11695 | 0.00000  | 0.00000  |
| 16 | C1 | DYY | 0.00000  | 0.00000  | 0.43344  | 0.00000  | 0.00000  |
| 17 | C1 | DZZ | 0.00000  | 0.00000  | -0.38986 | 0.00000  | 0.00000  |
| 18 | C1 | DXY | 0.00000  | 0.00000  | 0.13279  | 0.00000  | 0.00000  |
| 19 | C1 | DXZ | 0.02801  | 0.07069  | 0.00000  | 0.00392  | -0.08212 |
| 20 | C1 | DYZ | 0.02026  | -0.05215 | 0.00000  | 0.36538  | 0.38216  |
| 21 | C2 | S   | 0.00000  | 0.00000  | 0.03630  | 0.00000  | 0.00000  |

|    |    |     |          |          |          |          |          |
|----|----|-----|----------|----------|----------|----------|----------|
| 22 | C2 | S   | 0.00000  | 0.00000  | 0.30031  | 0.00000  | 0.00000  |
| 23 | C2 | PX  | 0.00000  | 0.00000  | 0.05897  | 0.00000  | 0.00000  |
| 24 | C2 | PY  | 0.00000  | 0.00000  | 0.19739  | 0.00000  | 0.00000  |
| 25 | C2 | PZ  | 0.02912  | 0.05822  | 0.00000  | 0.07453  | 0.07395  |
| 26 | C2 | S   | 0.00000  | 0.00000  | -0.58775 | 0.00000  | 0.00000  |
| 27 | C2 | PX  | 0.00000  | 0.00000  | 0.13407  | 0.00000  | 0.00000  |
| 28 | C2 | PY  | 0.00000  | 0.00000  | 1.13109  | 0.00000  | 0.00000  |
| 29 | C2 | PZ  | -0.02122 | 0.05864  | 0.00000  | 0.08922  | 0.08940  |
| 30 | C2 | DXX | 0.00000  | 0.00000  | 0.01281  | 0.00000  | 0.00000  |
| 31 | C2 | DYY | 0.00000  | 0.00000  | -0.36109 | 0.00000  | 0.00000  |
| 32 | C2 | DZZ | 0.00000  | 0.00000  | 0.44815  | 0.00000  | 0.00000  |
| 33 | C2 | DXY | 0.00000  | 0.00000  | 0.22441  | 0.00000  | 0.00000  |
| 34 | C2 | DXZ | 0.03496  | 0.07806  | 0.00000  | -0.01410 | 0.01289  |
| 35 | C2 | DYZ | -0.02226 | -0.16727 | 0.00000  | 0.37430  | 0.41282  |
| 36 | C3 | S   | 0.00000  | 0.00000  | -0.01666 | 0.00000  | 0.00000  |
| 37 | C3 | S   | 0.00000  | 0.00000  | -0.41525 | 0.00000  | 0.00000  |
| 38 | C3 | PX  | 0.00000  | 0.00000  | -0.08909 | 0.00000  | 0.00000  |
| 39 | C3 | PY  | 0.00000  | 0.00000  | -0.22276 | 0.00000  | 0.00000  |
| 40 | C3 | PZ  | -0.00715 | -0.04010 | 0.00000  | 0.11091  | 0.00534  |
| 41 | C3 | S   | 0.00000  | 0.00000  | 2.01275  | 0.00000  | 0.00000  |
| 42 | C3 | PX  | 0.00000  | 0.00000  | -2.29225 | 0.00000  | 0.00000  |
| 43 | C3 | PY  | 0.00000  | 0.00000  | -0.55732 | 0.00000  | 0.00000  |
| 44 | C3 | PZ  | -0.00133 | -0.12949 | 0.00000  | 0.01900  | -0.07404 |
| 45 | C3 | DXX | 0.00000  | 0.00000  | 0.06478  | 0.00000  | 0.00000  |
| 46 | C3 | DYY | 0.00000  | 0.00000  | -0.02038 | 0.00000  | 0.00000  |
| 47 | C3 | DZZ | 0.00000  | 0.00000  | -0.10395 | 0.00000  | 0.00000  |
| 48 | C3 | DXY | 0.00000  | 0.00000  | -0.06751 | 0.00000  | 0.00000  |
| 49 | C3 | DXZ | 0.51114  | 0.25624  | 0.00000  | 0.32824  | 0.12430  |
| 50 | C3 | DYZ | -0.22581 | 0.37128  | 0.00000  | -0.19019 | 0.41583  |
| 51 | C4 | S   | 0.00000  | 0.00000  | -0.02281 | 0.00000  | 0.00000  |
| 52 | C4 | S   | 0.00000  | 0.00000  | -0.11859 | 0.00000  | 0.00000  |
| 53 | C4 | PX  | 0.00000  | 0.00000  | -0.20204 | 0.00000  | 0.00000  |
| 54 | C4 | PY  | 0.00000  | 0.00000  | 0.12735  | 0.00000  | 0.00000  |
| 55 | C4 | PZ  | -0.01595 | -0.00370 | 0.00000  | -0.07936 | -0.09674 |
| 56 | C4 | S   | 0.00000  | 0.00000  | 0.84840  | 0.00000  | 0.00000  |
| 57 | C4 | PX  | 0.00000  | 0.00000  | 0.48953  | 0.00000  | 0.00000  |
| 58 | C4 | PY  | 0.00000  | 0.00000  | -0.96939 | 0.00000  | 0.00000  |
| 59 | C4 | PZ  | -0.05145 | 0.05489  | 0.00000  | -0.10446 | -0.06898 |
| 60 | C4 | DXX | 0.00000  | 0.00000  | 0.22082  | 0.00000  | 0.00000  |
| 61 | C4 | DYY | 0.00000  | 0.00000  | -0.05502 | 0.00000  | 0.00000  |
| 62 | C4 | DZZ | 0.00000  | 0.00000  | -0.16007 | 0.00000  | 0.00000  |
| 63 | C4 | DXY | 0.00000  | 0.00000  | -0.11156 | 0.00000  | 0.00000  |
| 64 | C4 | DXZ | 0.12894  | 0.35364  | 0.00000  | -0.15512 | -0.03353 |
| 65 | C4 | DYZ | -0.02468 | -0.17800 | 0.00000  | 0.15777  | 0.04919  |
| 66 | C5 | S   | 0.00000  | 0.00000  | 0.02173  | 0.00000  | 0.00000  |
| 67 | C5 | S   | 0.00000  | 0.00000  | 0.03183  | 0.00000  | 0.00000  |
| 68 | C5 | PX  | 0.00000  | 0.00000  | -0.14612 | 0.00000  | 0.00000  |
| 69 | C5 | PY  | 0.00000  | 0.00000  | -0.10354 | 0.00000  | 0.00000  |
| 70 | C5 | PZ  | 0.01065  | 0.04800  | 0.00000  | -0.07214 | -0.06524 |
| 71 | C5 | S   | 0.00000  | 0.00000  | -0.69980 | 0.00000  | 0.00000  |
| 72 | C5 | PX  | 0.00000  | 0.00000  | 0.40099  | 0.00000  | 0.00000  |
| 73 | C5 | PY  | 0.00000  | 0.00000  | 0.92561  | 0.00000  | 0.00000  |
| 74 | C5 | PZ  | 0.03717  | 0.01911  | 0.00000  | -0.08744 | -0.07857 |
| 75 | C5 | DXX | 0.00000  | 0.00000  | -0.23655 | 0.00000  | 0.00000  |

|     |    |     |          |          |          |          |          |
|-----|----|-----|----------|----------|----------|----------|----------|
| 76  | C5 | DYY | 0.00000  | 0.00000  | 0.07217  | 0.00000  | 0.00000  |
| 77  | C5 | DZZ | 0.00000  | 0.00000  | 0.14360  | 0.00000  | 0.00000  |
| 78  | C5 | DXY | 0.00000  | 0.00000  | -0.24149 | 0.00000  | 0.00000  |
| 79  | C5 | DXZ | 0.14037  | 0.21016  | 0.00000  | 0.24557  | 0.34323  |
| 80  | C5 | DYZ | 0.05148  | 0.06897  | 0.00000  | 0.21756  | 0.24888  |
| 81  | C6 | S   | 0.00000  | 0.00000  | 0.01033  | 0.00000  | 0.00000  |
| 82  | C6 | S   | 0.00000  | 0.00000  | 0.26784  | 0.00000  | 0.00000  |
| 83  | C6 | PX  | 0.00000  | 0.00000  | -0.12286 | 0.00000  | 0.00000  |
| 84  | C6 | PY  | 0.00000  | 0.00000  | 0.30452  | 0.00000  | 0.00000  |
| 85  | C6 | PZ  | 0.03768  | -0.02035 | 0.00000  | 0.12206  | 0.04422  |
| 86  | C6 | S   | 0.00000  | 0.00000  | -1.18067 | 0.00000  | 0.00000  |
| 87  | C6 | PX  | 0.00000  | 0.00000  | -2.56225 | 0.00000  | 0.00000  |
| 88  | C6 | PY  | 0.00000  | 0.00000  | 0.22096  | 0.00000  | 0.00000  |
| 89  | C6 | PZ  | 0.05501  | -0.02163 | 0.00000  | 0.15057  | 0.06500  |
| 90  | C6 | DXX | 0.00000  | 0.00000  | 0.03671  | 0.00000  | 0.00000  |
| 91  | C6 | DYY | 0.00000  | 0.00000  | -0.06247 | 0.00000  | 0.00000  |
| 92  | C6 | DZZ | 0.00000  | 0.00000  | 0.05467  | 0.00000  | 0.00000  |
| 93  | C6 | DXY | 0.00000  | 0.00000  | -0.08074 | 0.00000  | 0.00000  |
| 94  | C6 | DXZ | 0.40408  | 0.43683  | 0.00000  | -0.12382 | 0.06066  |
| 95  | C6 | DYZ | 0.05399  | -0.09786 | 0.00000  | -0.23301 | 0.05364  |
| 96  | C7 | S   | 0.00000  | 0.00000  | 0.00705  | 0.00000  | 0.00000  |
| 97  | C7 | S   | 0.00000  | 0.00000  | 0.06385  | 0.00000  | 0.00000  |
| 98  | C7 | PX  | 0.00000  | 0.00000  | 0.04754  | 0.00000  | 0.00000  |
| 99  | C7 | PY  | 0.00000  | 0.00000  | -0.04688 | 0.00000  | 0.00000  |
| 100 | C7 | PZ  | -0.11001 | 0.09305  | 0.00000  | -0.01461 | 0.06087  |
| 101 | C7 | S   | 0.00000  | 0.00000  | -0.71747 | 0.00000  | 0.00000  |
| 102 | C7 | PX  | 0.00000  | 0.00000  | 0.97659  | 0.00000  | 0.00000  |
| 103 | C7 | PY  | 0.00000  | 0.00000  | 0.29625  | 0.00000  | 0.00000  |
| 104 | C7 | PZ  | -0.15505 | 0.19656  | 0.00000  | -0.02536 | 0.09791  |
| 105 | C7 | DXX | 0.00000  | 0.00000  | -0.26008 | 0.00000  | 0.00000  |
| 106 | C7 | DYY | 0.00000  | 0.00000  | 0.18029  | 0.00000  | 0.00000  |
| 107 | C7 | DZZ | 0.00000  | 0.00000  | 0.09879  | 0.00000  | 0.00000  |
| 108 | C7 | DXY | 0.00000  | 0.00000  | 0.13087  | 0.00000  | 0.00000  |
| 109 | C7 | DXZ | 0.12403  | 0.09388  | 0.00000  | -0.12163 | 0.13682  |
| 110 | C7 | DYZ | -0.03786 | 0.14339  | 0.00000  | -0.51171 | 0.23884  |
| 111 | H3 | S   | 0.00000  | 0.00000  | 0.11999  | 0.00000  | 0.00000  |
| 112 | H3 | S   | 0.00000  | 0.00000  | 0.14065  | 0.00000  | 0.00000  |
| 113 | H3 | PX  | 0.00000  | 0.00000  | -0.12308 | 0.00000  | 0.00000  |
| 114 | H3 | PY  | 0.00000  | 0.00000  | 0.14389  | 0.00000  | 0.00000  |
| 115 | H3 | PZ  | 0.02575  | -0.03140 | 0.00000  | 0.09579  | 0.15598  |
| 116 | H4 | S   | 0.00000  | 0.00000  | -0.18521 | 0.00000  | 0.00000  |
| 117 | H4 | S   | 0.00000  | 0.00000  | -0.08750 | 0.00000  | 0.00000  |
| 118 | H4 | PX  | 0.00000  | 0.00000  | -0.09312 | 0.00000  | 0.00000  |
| 119 | H4 | PY  | 0.00000  | 0.00000  | -0.20514 | 0.00000  | 0.00000  |
| 120 | H4 | PZ  | -0.00711 | -0.03715 | 0.00000  | 0.08889  | 0.08523  |
| 121 | N1 | S   | 0.00000  | 0.00000  | -0.00556 | 0.00000  | 0.00000  |
| 122 | N1 | S   | 0.00000  | 0.00000  | -0.00709 | 0.00000  | 0.00000  |
| 123 | N1 | PX  | 0.00000  | 0.00000  | 0.00958  | 0.00000  | 0.00000  |
| 124 | N1 | PY  | 0.00000  | 0.00000  | 0.09159  | 0.00000  | 0.00000  |
| 125 | N1 | PZ  | 0.01438  | -0.00252 | 0.00000  | -0.00764 | 0.00987  |
| 126 | N1 | S   | 0.00000  | 0.00000  | 0.07861  | 0.00000  | 0.00000  |
| 127 | N1 | PX  | 0.00000  | 0.00000  | 0.64376  | 0.00000  | 0.00000  |
| 128 | N1 | PY  | 0.00000  | 0.00000  | -0.60885 | 0.00000  | 0.00000  |
| 129 | N1 | PZ  | 0.17542  | 0.11209  | 0.00000  | -0.15096 | -0.09936 |

|     |     |     |          |          |          |          |          |
|-----|-----|-----|----------|----------|----------|----------|----------|
| 130 | N1  | DXX | 0.00000  | 0.00000  | 0.36798  | 0.00000  | 0.00000  |
| 131 | N1  | DYY | 0.00000  | 0.00000  | -0.13095 | 0.00000  | 0.00000  |
| 132 | N1  | DZZ | 0.00000  | 0.00000  | -0.17542 | 0.00000  | 0.00000  |
| 133 | N1  | DXY | 0.00000  | 0.00000  | 0.16551  | 0.00000  | 0.00000  |
| 134 | N1  | DXZ | 0.28263  | 0.13766  | 0.00000  | -0.04888 | -0.25885 |
| 135 | N1  | DYZ | -0.22432 | 0.03636  | 0.00000  | -0.40313 | 0.13451  |
| 136 | H6  | S   | 0.00000  | 0.00000  | 0.06500  | 0.00000  | 0.00000  |
| 137 | H6  | S   | 0.00000  | 0.00000  | 0.11852  | 0.00000  | 0.00000  |
| 138 | H6  | PX  | 0.00000  | 0.00000  | 0.00010  | 0.00000  | 0.00000  |
| 139 | H6  | PY  | 0.00000  | 0.00000  | 0.10492  | 0.00000  | 0.00000  |
| 140 | H6  | PZ  | 0.04653  | -0.03751 | 0.00000  | -0.23215 | -0.13815 |
| 141 | C8  | S   | 0.00000  | 0.00000  | -0.00528 | 0.00000  | 0.00000  |
| 142 | C8  | S   | 0.00000  | 0.00000  | -0.15238 | 0.00000  | 0.00000  |
| 143 | C8  | PX  | 0.00000  | 0.00000  | 0.10895  | 0.00000  | 0.00000  |
| 144 | C8  | PY  | 0.00000  | 0.00000  | -0.06039 | 0.00000  | 0.00000  |
| 145 | C8  | PZ  | -0.05703 | 0.02684  | 0.00000  | -0.03956 | 0.06299  |
| 146 | C8  | S   | 0.00000  | 0.00000  | 0.29128  | 0.00000  | 0.00000  |
| 147 | C8  | PX  | 0.00000  | 0.00000  | 0.68627  | 0.00000  | 0.00000  |
| 148 | C8  | PY  | 0.00000  | 0.00000  | 0.26474  | 0.00000  | 0.00000  |
| 149 | C8  | PZ  | -0.16443 | -0.00738 | 0.00000  | 0.02903  | -0.02407 |
| 150 | C8  | DXX | 0.00000  | 0.00000  | -0.04054 | 0.00000  | 0.00000  |
| 151 | C8  | DYY | 0.00000  | 0.00000  | 0.02543  | 0.00000  | 0.00000  |
| 152 | C8  | DZZ | 0.00000  | 0.00000  | 0.03006  | 0.00000  | 0.00000  |
| 153 | C8  | DXY | 0.00000  | 0.00000  | 0.12589  | 0.00000  | 0.00000  |
| 154 | C8  | DXZ | 0.59030  | 0.08955  | 0.00000  | -0.15231 | -0.09181 |
| 155 | C8  | DYZ | 0.18479  | -0.36479 | 0.00000  | -0.27673 | 0.33328  |
| 156 | H8  | S   | 0.00000  | 0.00000  | 0.10583  | 0.00000  | 0.00000  |
| 157 | H8  | S   | 0.00000  | 0.00000  | -0.37145 | 0.00000  | 0.00000  |
| 158 | H8  | PX  | 0.00000  | 0.00000  | 0.12595  | 0.00000  | 0.00000  |
| 159 | H8  | PY  | 0.00000  | 0.00000  | -0.02791 | 0.00000  | 0.00000  |
| 160 | H8  | PZ  | 0.26040  | -0.46690 | 0.00000  | -0.07397 | -0.23795 |
| 161 | C10 | S   | 0.00000  | 0.00000  | -0.00085 | 0.00000  | 0.00000  |
| 162 | C10 | S   | 0.00000  | 0.00000  | -0.01124 | 0.00000  | 0.00000  |
| 163 | C10 | PX  | 0.00000  | 0.00000  | -0.01380 | 0.00000  | 0.00000  |
| 164 | C10 | PY  | 0.00000  | 0.00000  | -0.02174 | 0.00000  | 0.00000  |
| 165 | C10 | PZ  | 0.06351  | -0.10196 | 0.00000  | -0.07262 | 0.11280  |
| 166 | C10 | S   | 0.00000  | 0.00000  | 0.13789  | 0.00000  | 0.00000  |
| 167 | C10 | PX  | 0.00000  | 0.00000  | -0.18622 | 0.00000  | 0.00000  |
| 168 | C10 | PY  | 0.00000  | 0.00000  | 0.09473  | 0.00000  | 0.00000  |
| 169 | C10 | PZ  | 0.17192  | -0.16267 | 0.00000  | -0.11133 | 0.15985  |
| 170 | C10 | DXX | 0.00000  | 0.00000  | -0.01454 | 0.00000  | 0.00000  |
| 171 | C10 | DYY | 0.00000  | 0.00000  | 0.02121  | 0.00000  | 0.00000  |
| 172 | C10 | DZZ | 0.00000  | 0.00000  | -0.01975 | 0.00000  | 0.00000  |
| 173 | C10 | DXY | 0.00000  | 0.00000  | -0.14470 | 0.00000  | 0.00000  |
| 174 | C10 | DXZ | 0.07782  | 0.00772  | 0.00000  | -0.03973 | -0.02351 |
| 175 | C10 | DYZ | 0.18327  | -0.11365 | 0.00000  | -0.04373 | -0.06072 |
| 176 | H16 | S   | 0.00000  | 0.00000  | -0.07659 | 0.00000  | 0.00000  |
| 177 | H16 | S   | 0.00000  | 0.00000  | 0.16247  | 0.00000  | 0.00000  |
| 178 | H16 | PX  | 0.00000  | 0.00000  | 0.05113  | 0.00000  | 0.00000  |
| 179 | H16 | PY  | 0.00000  | 0.00000  | 0.15767  | 0.00000  | 0.00000  |
| 180 | H16 | PZ  | -0.32011 | 0.24909  | 0.00000  | 0.25278  | -0.33808 |
| 181 | H18 | S   | 0.00000  | 0.00000  | 0.04937  | 0.00000  | 0.00000  |
| 182 | H18 | S   | 0.00000  | 0.00000  | -0.10386 | 0.00000  | 0.00000  |
| 183 | H18 | PX  | 0.00000  | 0.00000  | 0.02754  | 0.00000  | 0.00000  |

|     |     |    |          |         |          |         |          |
|-----|-----|----|----------|---------|----------|---------|----------|
| 184 | H18 | PY | 0.00000  | 0.00000 | -0.14848 | 0.00000 | 0.00000  |
| 185 | H18 | PZ | -0.02902 | 0.31855 | 0.00000  | 0.15261 | -0.38947 |

|              |  |          |          |          |          |          |
|--------------|--|----------|----------|----------|----------|----------|
| MO:          |  | 136      | 137      | 138      | 139      | 140      |
| Eigenvalues: |  | 2.61465  | 2.64801  | 2.68326  | 2.70446  | 2.71343  |
| (ev):        |  | 71.14828 | 72.05602 | 73.01517 | 73.59204 | 73.83611 |

|    |    | A   | A        | A        | A        | A        |          |
|----|----|-----|----------|----------|----------|----------|----------|
| 1  | H1 | S   | -0.09206 | -0.25088 | 0.00000  | -0.08840 | 0.00000  |
| 2  | H1 | S   | 0.19493  | 0.28337  | 0.00000  | 0.06172  | 0.00000  |
| 3  | H1 | PX  | -0.11708 | -0.19510 | 0.00000  | 0.07800  | 0.00000  |
| 4  | H1 | PY  | 0.14465  | 0.06234  | 0.00000  | -0.21260 | 0.00000  |
| 5  | H1 | PZ  | 0.00000  | 0.00000  | -0.11704 | 0.00000  | -0.41877 |
| 6  | C1 | S   | -0.03692 | -0.03252 | 0.00000  | -0.02264 | 0.00000  |
| 7  | C1 | S   | -0.17754 | -0.19199 | 0.00000  | -0.07861 | 0.00000  |
| 8  | C1 | PX  | -0.08620 | -0.12851 | 0.00000  | -0.02648 | 0.00000  |
| 9  | C1 | PY  | -0.10895 | 0.07528  | 0.00000  | 0.03435  | 0.00000  |
| 10 | C1 | PZ  | 0.00000  | 0.00000  | -0.02317 | 0.00000  | 0.08906  |
| 11 | C1 | S   | 1.17478  | 1.47144  | 0.00000  | 1.37082  | 0.00000  |
| 12 | C1 | PX  | -0.51479 | -0.51233 | 0.00000  | -0.27330 | 0.00000  |
| 13 | C1 | PY  | -1.04810 | 0.33824  | 0.00000  | 0.01394  | 0.00000  |
| 14 | C1 | PZ  | 0.00000  | 0.00000  | -0.04034 | 0.00000  | 0.10352  |
| 15 | C1 | DXX | 0.14670  | 0.33758  | 0.00000  | 0.02122  | 0.00000  |
| 16 | C1 | DYY | 0.16207  | -0.11719 | 0.00000  | 0.19067  | 0.00000  |
| 17 | C1 | DZZ | -0.37733 | -0.32251 | 0.00000  | -0.16279 | 0.00000  |
| 18 | C1 | DXY | 0.24754  | -0.02500 | 0.00000  | 0.09412  | 0.00000  |
| 19 | C1 | DXZ | 0.00000  | 0.00000  | 0.14002  | 0.00000  | 0.17718  |
| 20 | C1 | DYZ | 0.00000  | 0.00000  | -0.29975 | 0.00000  | 0.31707  |
| 21 | C2 | S   | -0.03420 | -0.00885 | 0.00000  | 0.00087  | 0.00000  |
| 22 | C2 | S   | -0.38728 | -0.23808 | 0.00000  | 0.02558  | 0.00000  |
| 23 | C2 | PX  | -0.00835 | -0.02266 | 0.00000  | 0.05246  | 0.00000  |
| 24 | C2 | PY  | -0.13875 | 0.00515  | 0.00000  | -0.02196 | 0.00000  |
| 25 | C2 | PZ  | 0.00000  | 0.00000  | 0.09680  | 0.00000  | -0.01636 |
| 26 | C2 | S   | 2.46070  | 1.29304  | 0.00000  | -0.82821 | 0.00000  |
| 27 | C2 | PX  | 1.45002  | 0.63600  | 0.00000  | 0.23888  | 0.00000  |
| 28 | C2 | PY  | -0.76482 | 0.52839  | 0.00000  | -0.39811 | 0.00000  |
| 29 | C2 | PZ  | 0.00000  | 0.00000  | 0.07559  | 0.00000  | -0.01625 |
| 30 | C2 | DXX | 0.12751  | 0.21129  | 0.00000  | 0.01648  | 0.00000  |
| 31 | C2 | DYY | 0.09218  | -0.25571 | 0.00000  | 0.01802  | 0.00000  |
| 32 | C2 | DZZ | -0.20539 | -0.00833 | 0.00000  | -0.05893 | 0.00000  |
| 33 | C2 | DXY | -0.23642 | 0.14156  | 0.00000  | -0.08795 | 0.00000  |
| 34 | C2 | DXZ | 0.00000  | 0.00000  | -0.19892 | 0.00000  | -0.05076 |
| 35 | C2 | DYZ | 0.00000  | 0.00000  | -0.17584 | 0.00000  | 0.14695  |
| 36 | C3 | S   | 0.01412  | -0.01576 | 0.00000  | -0.04053 | 0.00000  |
| 37 | C3 | S   | -0.03108 | 0.03405  | 0.00000  | -0.23874 | 0.00000  |
| 38 | C3 | PX  | 0.03949  | 0.06444  | 0.00000  | -0.10646 | 0.00000  |
| 39 | C3 | PY  | -0.28984 | -0.21388 | 0.00000  | -0.05873 | 0.00000  |
| 40 | C3 | PZ  | 0.00000  | 0.00000  | -0.03095 | 0.00000  | 0.04004  |
| 41 | C3 | S   | 0.43175  | 0.95389  | 0.00000  | 1.39066  | 0.00000  |
| 42 | C3 | PX  | -0.66388 | 0.56320  | 0.00000  | -0.67912 | 0.00000  |
| 43 | C3 | PY  | -1.73162 | -1.25206 | 0.00000  | -1.04298 | 0.00000  |
| 44 | C3 | PZ  | 0.00000  | 0.00000  | -0.01475 | 0.00000  | -0.04548 |
| 45 | C3 | DXX | 0.05738  | 0.16001  | 0.00000  | 0.18318  | 0.00000  |
| 46 | C3 | DYY | -0.07293 | 0.05620  | 0.00000  | 0.06182  | 0.00000  |

|     |    |     |          |          |          |          |          |
|-----|----|-----|----------|----------|----------|----------|----------|
| 47  | C3 | DZZ | 0.06065  | -0.11470 | 0.00000  | -0.29726 | 0.00000  |
| 48  | C3 | DXY | -0.14085 | -0.02089 | 0.00000  | -0.17911 | 0.00000  |
| 49  | C3 | DXZ | 0.00000  | 0.00000  | 0.06658  | 0.00000  | -0.09623 |
| 50  | C3 | DYZ | 0.00000  | 0.00000  | -0.09551 | 0.00000  | 0.19569  |
| 51  | C4 | S   | -0.00585 | 0.00533  | 0.00000  | -0.02168 | 0.00000  |
| 52  | C4 | S   | -0.08371 | -0.03233 | 0.00000  | -0.01223 | 0.00000  |
| 53  | C4 | PX  | -0.00698 | 0.02249  | 0.00000  | -0.19518 | 0.00000  |
| 54  | C4 | PY  | 0.05442  | 0.10026  | 0.00000  | 0.02679  | 0.00000  |
| 55  | C4 | PZ  | 0.00000  | 0.00000  | 0.07986  | 0.00000  | 0.03600  |
| 56  | C4 | S   | 0.78756  | -0.48513 | 0.00000  | 0.52772  | 0.00000  |
| 57  | C4 | PX  | 0.18403  | -0.89441 | 0.00000  | -0.81419 | 0.00000  |
| 58  | C4 | PY  | -0.29582 | 0.23931  | 0.00000  | 0.50646  | 0.00000  |
| 59  | C4 | PZ  | 0.00000  | 0.00000  | 0.07964  | 0.00000  | 0.01630  |
| 60  | C4 | DXX | 0.00243  | 0.06691  | 0.00000  | 0.28686  | 0.00000  |
| 61  | C4 | DYY | -0.02774 | -0.16205 | 0.00000  | -0.16292 | 0.00000  |
| 62  | C4 | DZZ | 0.06076  | 0.12809  | 0.00000  | -0.15866 | 0.00000  |
| 63  | C4 | DXY | 0.00653  | 0.01150  | 0.00000  | 0.15462  | 0.00000  |
| 64  | C4 | DXZ | 0.00000  | 0.00000  | 0.37087  | 0.00000  | -0.12311 |
| 65  | C4 | DYZ | 0.00000  | 0.00000  | -0.01564 | 0.00000  | 0.45216  |
| 66  | C5 | S   | -0.00669 | 0.01643  | 0.00000  | 0.02150  | 0.00000  |
| 67  | C5 | S   | 0.18391  | 0.25496  | 0.00000  | -0.05821 | 0.00000  |
| 68  | C5 | PX  | 0.06035  | -0.07371 | 0.00000  | -0.12538 | 0.00000  |
| 69  | C5 | PY  | -0.03672 | -0.02326 | 0.00000  | 0.02490  | 0.00000  |
| 70  | C5 | PZ  | 0.00000  | 0.00000  | 0.10815  | 0.00000  | 0.00558  |
| 71  | C5 | S   | -0.69566 | -1.73806 | 0.00000  | -0.37698 | 0.00000  |
| 72  | C5 | PX  | -0.59483 | -0.02037 | 0.00000  | -1.05266 | 0.00000  |
| 73  | C5 | PY  | 0.62978  | 0.59455  | 0.00000  | -0.59731 | 0.00000  |
| 74  | C5 | PZ  | 0.00000  | 0.00000  | 0.05773  | 0.00000  | 0.03510  |
| 75  | C5 | DXX | 0.08059  | -0.01073 | 0.00000  | -0.23735 | 0.00000  |
| 76  | C5 | DYY | -0.03768 | -0.10552 | 0.00000  | 0.08194  | 0.00000  |
| 77  | C5 | DZZ | -0.08370 | 0.10205  | 0.00000  | 0.19398  | 0.00000  |
| 78  | C5 | DXY | 0.05249  | 0.16438  | 0.00000  | -0.02018 | 0.00000  |
| 79  | C5 | DXZ | 0.00000  | 0.00000  | -0.01984 | 0.00000  | -0.18050 |
| 80  | C5 | DYZ | 0.00000  | 0.00000  | 0.22190  | 0.00000  | 0.18965  |
| 81  | C6 | S   | 0.00150  | -0.04089 | 0.00000  | 0.04185  | 0.00000  |
| 82  | C6 | S   | 0.08275  | -0.25181 | 0.00000  | 0.26334  | 0.00000  |
| 83  | C6 | PX  | -0.05032 | -0.16567 | 0.00000  | -0.05627 | 0.00000  |
| 84  | C6 | PY  | -0.12817 | 0.18178  | 0.00000  | -0.17544 | 0.00000  |
| 85  | C6 | PZ  | 0.00000  | 0.00000  | 0.04903  | 0.00000  | -0.04708 |
| 86  | C6 | S   | -1.12585 | 0.54185  | 0.00000  | -1.11792 | 0.00000  |
| 87  | C6 | PX  | 0.50935  | 0.23886  | 0.00000  | -0.87857 | 0.00000  |
| 88  | C6 | PY  | -1.97624 | -0.52710 | 0.00000  | 0.05899  | 0.00000  |
| 89  | C6 | PZ  | 0.00000  | 0.00000  | 0.06809  | 0.00000  | -0.06340 |
| 90  | C6 | DXX | -0.00364 | 0.01886  | 0.00000  | -0.21037 | 0.00000  |
| 91  | C6 | DYY | 0.05376  | 0.20638  | 0.00000  | -0.02565 | 0.00000  |
| 92  | C6 | DZZ | -0.19118 | -0.27908 | 0.00000  | 0.26220  | 0.00000  |
| 93  | C6 | DXY | 0.20349  | 0.05876  | 0.00000  | -0.00424 | 0.00000  |
| 94  | C6 | DXZ | 0.00000  | 0.00000  | 0.13624  | 0.00000  | -0.08953 |
| 95  | C6 | DYZ | 0.00000  | 0.00000  | -0.33636 | 0.00000  | 0.31243  |
| 96  | C7 | S   | 0.06646  | 0.01851  | 0.00000  | -0.05602 | 0.00000  |
| 97  | C7 | S   | 0.53837  | 0.15280  | 0.00000  | -0.31054 | 0.00000  |
| 98  | C7 | PX  | 0.05854  | -0.10026 | 0.00000  | -0.08097 | 0.00000  |
| 99  | C7 | PY  | -0.09486 | -0.16758 | 0.00000  | -0.29922 | 0.00000  |
| 100 | C7 | PZ  | 0.00000  | 0.00000  | -0.01205 | 0.00000  | 0.04490  |

|     |    |     |          |          |          |          |          |
|-----|----|-----|----------|----------|----------|----------|----------|
| 101 | C7 | S   | -3.23497 | -0.61543 | 0.00000  | 1.11071  | 0.00000  |
| 102 | C7 | PX  | 1.84783  | -0.22212 | 0.00000  | -0.66083 | 0.00000  |
| 103 | C7 | PY  | -0.57815 | -1.39467 | 0.00000  | -0.91919 | 0.00000  |
| 104 | C7 | PZ  | 0.00000  | 0.00000  | -0.03867 | 0.00000  | 0.08431  |
| 105 | C7 | DXX | -0.30280 | 0.19510  | 0.00000  | 0.24090  | 0.00000  |
| 106 | C7 | DYY | -0.16183 | -0.34548 | 0.00000  | 0.09636  | 0.00000  |
| 107 | C7 | DZZ | 0.57237  | 0.21706  | 0.00000  | -0.44906 | 0.00000  |
| 108 | C7 | DXY | 0.12771  | 0.24901  | 0.00000  | 0.37722  | 0.00000  |
| 109 | C7 | DXZ | 0.00000  | 0.00000  | -0.08143 | 0.00000  | 0.18946  |
| 110 | C7 | DYZ | 0.00000  | 0.00000  | -0.08347 | 0.00000  | 0.13420  |
| 111 | H3 | S   | -0.00854 | 0.12381  | 0.00000  | -0.07845 | 0.00000  |
| 112 | H3 | S   | 0.02774  | 0.04368  | 0.00000  | -0.04898 | 0.00000  |
| 113 | H3 | PX  | -0.11012 | 0.38307  | 0.00000  | -0.03131 | 0.00000  |
| 114 | H3 | PY  | 0.11773  | -0.09853 | 0.00000  | 0.00823  | 0.00000  |
| 115 | H3 | PZ  | 0.00000  | 0.00000  | -0.34926 | 0.00000  | -0.52580 |
| 116 | H4 | S   | -0.06628 | 0.15601  | 0.00000  | 0.02656  | 0.00000  |
| 117 | H4 | S   | -0.23820 | -0.17784 | 0.00000  | 0.02732  | 0.00000  |
| 118 | H4 | PX  | 0.15511  | -0.22871 | 0.00000  | 0.27370  | 0.00000  |
| 119 | H4 | PY  | 0.12606  | -0.04689 | 0.00000  | 0.16225  | 0.00000  |
| 120 | H4 | PZ  | 0.00000  | 0.00000  | -0.45584 | 0.00000  | -0.36233 |
| 121 | N1 | S   | 0.01604  | -0.01205 | 0.00000  | 0.03130  | 0.00000  |
| 122 | N1 | S   | 0.28868  | -0.28323 | 0.00000  | 0.53464  | 0.00000  |
| 123 | N1 | PX  | -0.00493 | -0.03443 | 0.00000  | 0.03385  | 0.00000  |
| 124 | N1 | PY  | -0.18940 | -0.15470 | 0.00000  | 0.04155  | 0.00000  |
| 125 | N1 | PZ  | 0.00000  | 0.00000  | 0.00106  | 0.00000  | 0.00422  |
| 126 | N1 | S   | -1.49822 | 0.45830  | 0.00000  | -1.60388 | 0.00000  |
| 127 | N1 | PX  | -0.64756 | 0.34532  | 0.00000  | -0.44114 | 0.00000  |
| 128 | N1 | PY  | -0.26016 | 0.17271  | 0.00000  | 0.13320  | 0.00000  |
| 129 | N1 | PZ  | 0.00000  | 0.00000  | -0.20641 | 0.00000  | 0.17005  |
| 130 | N1 | DXX | -0.30268 | 0.18835  | 0.00000  | -0.12110 | 0.00000  |
| 131 | N1 | DYY | 0.04876  | -0.03640 | 0.00000  | -0.17841 | 0.00000  |
| 132 | N1 | DZZ | 0.22093  | -0.21662 | 0.00000  | 0.35398  | 0.00000  |
| 133 | N1 | DXY | -0.05321 | 0.05224  | 0.00000  | 0.14733  | 0.00000  |
| 134 | N1 | DXZ | 0.00000  | 0.00000  | -0.35963 | 0.00000  | 0.27251  |
| 135 | N1 | DYZ | 0.00000  | 0.00000  | -0.10636 | 0.00000  | 0.13749  |
| 136 | H6 | S   | 0.00894  | -0.11712 | 0.00000  | 0.09631  | 0.00000  |
| 137 | H6 | S   | 0.35563  | 0.27300  | 0.00000  | 0.10484  | 0.00000  |
| 138 | H6 | PX  | 0.03440  | 0.12657  | 0.00000  | 0.06755  | 0.00000  |
| 139 | H6 | PY  | 0.02180  | -0.09204 | 0.00000  | 0.09041  | 0.00000  |
| 140 | H6 | PZ  | 0.00000  | 0.00000  | -0.46890 | 0.00000  | -0.02809 |
| 141 | C8 | S   | 0.00379  | 0.02905  | 0.00000  | 0.03256  | 0.00000  |
| 142 | C8 | S   | 0.11219  | 0.17125  | 0.00000  | 0.21766  | 0.00000  |
| 143 | C8 | PX  | -0.01278 | -0.01867 | 0.00000  | -0.35182 | 0.00000  |
| 144 | C8 | PY  | 0.48011  | -0.19099 | 0.00000  | 0.02018  | 0.00000  |
| 145 | C8 | PZ  | 0.00000  | 0.00000  | 0.04253  | 0.00000  | -0.00909 |
| 146 | C8 | S   | 0.21694  | -0.01755 | 0.00000  | -0.86443 | 0.00000  |
| 147 | C8 | PX  | 0.86154  | -0.67616 | 0.00000  | -1.70817 | 0.00000  |
| 148 | C8 | PY  | 1.17511  | -1.91425 | 0.00000  | -0.16588 | 0.00000  |
| 149 | C8 | PZ  | 0.00000  | 0.00000  | 0.07206  | 0.00000  | -0.06726 |
| 150 | C8 | DXX | -0.08392 | -0.17401 | 0.00000  | -0.24546 | 0.00000  |
| 151 | C8 | DYY | -0.09239 | 0.06719  | 0.00000  | 0.00436  | 0.00000  |
| 152 | C8 | DZZ | 0.08676  | 0.20041  | 0.00000  | 0.23982  | 0.00000  |
| 153 | C8 | DXY | 0.06275  | -0.06662 | 0.00000  | -0.20400 | 0.00000  |
| 154 | C8 | DXZ | 0.00000  | 0.00000  | -0.20092 | 0.00000  | 0.17058  |

|     |     |     |          |          |          |          |          |
|-----|-----|-----|----------|----------|----------|----------|----------|
| 155 | C8  | DYZ | 0.00000  | 0.00000  | 0.08220  | 0.00000  | -0.01544 |
| 156 | H8  | S   | 0.15711  | -0.00229 | 0.00000  | -0.07922 | 0.00000  |
| 157 | H8  | S   | -0.64405 | -0.07421 | 0.00000  | 0.06641  | 0.00000  |
| 158 | H8  | PX  | 0.16779  | 0.14920  | 0.00000  | 0.04767  | 0.00000  |
| 159 | H8  | PY  | -0.06119 | 0.27364  | 0.00000  | 0.19302  | 0.00000  |
| 160 | H8  | PZ  | 0.00000  | 0.00000  | 0.10368  | 0.00000  | -0.26763 |
| 161 | C10 | S   | -0.04215 | 0.03573  | 0.00000  | -0.00380 | 0.00000  |
| 162 | C10 | S   | -0.18499 | 0.13951  | 0.00000  | -0.01127 | 0.00000  |
| 163 | C10 | PX  | 0.01598  | 0.02293  | 0.00000  | 0.11245  | 0.00000  |
| 164 | C10 | PY  | 0.15744  | -0.11772 | 0.00000  | 0.04355  | 0.00000  |
| 165 | C10 | PZ  | 0.00000  | 0.00000  | 0.04001  | 0.00000  | -0.00579 |
| 166 | C10 | S   | 1.50496  | -1.90112 | 0.00000  | 0.11564  | 0.00000  |
| 167 | C10 | PX  | -0.35932 | 0.03218  | 0.00000  | 0.73954  | 0.00000  |
| 168 | C10 | PY  | 0.86383  | -1.01612 | 0.00000  | -0.13294 | 0.00000  |
| 169 | C10 | PZ  | 0.00000  | 0.00000  | 0.04393  | 0.00000  | -0.00095 |
| 170 | C10 | DXX | -0.05676 | 0.03225  | 0.00000  | -0.00204 | 0.00000  |
| 171 | C10 | DYY | 0.43259  | -0.27831 | 0.00000  | 0.00307  | 0.00000  |
| 172 | C10 | DZZ | -0.48699 | 0.30718  | 0.00000  | -0.05968 | 0.00000  |
| 173 | C10 | DXY | -0.00133 | 0.06890  | 0.00000  | 0.30814  | 0.00000  |
| 174 | C10 | DXZ | 0.00000  | 0.00000  | -0.09883 | 0.00000  | 0.10578  |
| 175 | C10 | DYZ | 0.00000  | 0.00000  | -0.12299 | 0.00000  | 0.03998  |
| 176 | H16 | S   | -0.05945 | 0.14256  | 0.00000  | 0.04006  | 0.00000  |
| 177 | H16 | S   | 0.22526  | -0.20011 | 0.00000  | -0.45350 | 0.00000  |
| 178 | H16 | PX  | -0.11975 | 0.04621  | 0.00000  | -0.00107 | 0.00000  |
| 179 | H16 | PY  | -0.03603 | -0.01734 | 0.00000  | -0.17392 | 0.00000  |
| 180 | H16 | PZ  | 0.00000  | 0.00000  | -0.08143 | 0.00000  | -0.06377 |
| 181 | H18 | S   | -0.12373 | 0.04471  | 0.00000  | -0.03018 | 0.00000  |
| 182 | H18 | S   | -0.09542 | -0.01667 | 0.00000  | 0.30977  | 0.00000  |
| 183 | H18 | PX  | 0.09912  | -0.05610 | 0.00000  | 0.05884  | 0.00000  |
| 184 | H18 | PY  | -0.08305 | 0.14605  | 0.00000  | 0.29543  | 0.00000  |
| 185 | H18 | PZ  | 0.00000  | 0.00000  | -0.28515 | 0.00000  | 0.15609  |

|              |          |          |          |          |          |
|--------------|----------|----------|----------|----------|----------|
| MO:          | 141      | 142      | 143      | 144      | 145      |
| Eigenvalues: | 2.72800  | 2.73003  | 2.74124  | 2.80231  | 2.80292  |
| (ev):        | 74.23264 | 74.28780 | 74.59310 | 76.25478 | 76.27139 |

|    |    | A   | A        | A        | A        | A        |          |
|----|----|-----|----------|----------|----------|----------|----------|
| 1  | H1 | S   | 0.07951  | 0.00000  | 0.00941  | 0.00000  | 0.05690  |
| 2  | H1 | S   | -0.22101 | 0.00000  | -0.12936 | 0.00000  | 0.16581  |
| 3  | H1 | PX  | 0.14472  | 0.00000  | 0.12504  | 0.00000  | -0.00788 |
| 4  | H1 | PY  | 0.05354  | 0.00000  | 0.22061  | 0.00000  | -0.44815 |
| 5  | H1 | PZ  | 0.00000  | 0.44587  | 0.00000  | 0.15800  | 0.00000  |
| 6  | C1 | S   | 0.00012  | 0.00000  | 0.00666  | 0.00000  | 0.00846  |
| 7  | C1 | S   | 0.33103  | 0.00000  | -0.08909 | 0.00000  | 0.02845  |
| 8  | C1 | PX  | -0.05826 | 0.00000  | 0.20044  | 0.00000  | -0.05718 |
| 9  | C1 | PY  | 0.03976  | 0.00000  | -0.16372 | 0.00000  | 0.18510  |
| 10 | C1 | PZ  | 0.00000  | -0.02550 | 0.00000  | -0.03798 | 0.00000  |
| 11 | C1 | S   | -0.87578 | 0.00000  | 0.41085  | 0.00000  | -0.30726 |
| 12 | C1 | PX  | 0.54749  | 0.00000  | 0.23894  | 0.00000  | -0.39225 |
| 13 | C1 | PY  | -0.38709 | 0.00000  | -0.89007 | 0.00000  | 1.03366  |
| 14 | C1 | PZ  | 0.00000  | -0.06795 | 0.00000  | -0.05023 | 0.00000  |
| 15 | C1 | DXX | -0.18810 | 0.00000  | -0.12130 | 0.00000  | 0.06113  |
| 16 | C1 | DYY | 0.27594  | 0.00000  | 0.00275  | 0.00000  | 0.00391  |
| 17 | C1 | DZZ | -0.03703 | 0.00000  | 0.15248  | 0.00000  | 0.00161  |



|    |    |     |          |          |          |          |          |
|----|----|-----|----------|----------|----------|----------|----------|
| 18 | C1 | DXY | 0.01032  | 0.00000  | 0.11040  | 0.00000  | -0.03098 |
| 19 | C1 | DXZ | 0.00000  | -0.30058 | 0.00000  | -0.08709 | 0.00000  |
| 20 | C1 | DYZ | 0.00000  | 0.06428  | 0.00000  | 0.03195  | 0.00000  |
| 21 | C2 | S   | 0.02492  | 0.00000  | -0.00904 | 0.00000  | -0.03735 |
| 22 | C2 | S   | 0.24398  | 0.00000  | -0.15362 | 0.00000  | 0.04382  |
| 23 | C2 | PX  | -0.00846 | 0.00000  | 0.09906  | 0.00000  | 0.27581  |
| 24 | C2 | PY  | 0.02129  | 0.00000  | 0.05206  | 0.00000  | 0.38836  |
| 25 | C2 | PZ  | 0.00000  | 0.03237  | 0.00000  | 0.02993  | 0.00000  |
| 26 | C2 | S   | -1.12159 | 0.00000  | 0.24962  | 0.00000  | 1.46243  |
| 27 | C2 | PX  | -0.26596 | 0.00000  | 0.41065  | 0.00000  | 0.29138  |
| 28 | C2 | PY  | 0.71335  | 0.00000  | 0.38125  | 0.00000  | 2.09176  |
| 29 | C2 | PZ  | 0.00000  | 0.07224  | 0.00000  | 0.03870  | 0.00000  |
| 30 | C2 | DXX | -0.14912 | 0.00000  | 0.18666  | 0.00000  | 0.17248  |
| 31 | C2 | DYY | 0.04720  | 0.00000  | -0.17479 | 0.00000  | 0.22050  |
| 32 | C2 | DZZ | 0.21501  | 0.00000  | -0.12150 | 0.00000  | -0.41272 |
| 33 | C2 | DXY | 0.00954  | 0.00000  | 0.11861  | 0.00000  | 0.31598  |
| 34 | C2 | DXZ | 0.00000  | -0.31434 | 0.00000  | 0.04431  | 0.00000  |
| 35 | C2 | DYZ | 0.00000  | 0.02044  | 0.00000  | 0.29577  | 0.00000  |
| 36 | C3 | S   | 0.00109  | 0.00000  | 0.00444  | 0.00000  | -0.00809 |
| 37 | C3 | S   | 0.02857  | 0.00000  | -0.02435 | 0.00000  | -0.13041 |
| 38 | C3 | PX  | -0.11174 | 0.00000  | -0.04534 | 0.00000  | 0.02669  |
| 39 | C3 | PY  | -0.14863 | 0.00000  | 0.21546  | 0.00000  | 0.03722  |
| 40 | C3 | PZ  | 0.00000  | -0.02964 | 0.00000  | -0.05079 | 0.00000  |
| 41 | C3 | S   | 0.76155  | 0.00000  | 0.85078  | 0.00000  | 1.14407  |
| 42 | C3 | PX  | -0.02944 | 0.00000  | -1.28556 | 0.00000  | 1.07016  |
| 43 | C3 | PY  | -0.61299 | 0.00000  | -1.72428 | 0.00000  | -0.03209 |
| 44 | C3 | PZ  | 0.00000  | 0.08268  | 0.00000  | 0.04556  | 0.00000  |
| 45 | C3 | DXX | 0.06765  | 0.00000  | 0.07073  | 0.00000  | -0.16960 |
| 46 | C3 | DYY | -0.06780 | 0.00000  | -0.16050 | 0.00000  | 0.18259  |
| 47 | C3 | DZZ | 0.06953  | 0.00000  | 0.07691  | 0.00000  | -0.05076 |
| 48 | C3 | DXY | -0.05549 | 0.00000  | 0.17597  | 0.00000  | 0.12019  |
| 49 | C3 | DXZ | 0.00000  | -0.18436 | 0.00000  | 0.12202  | 0.00000  |
| 50 | C3 | DYZ | 0.00000  | 0.06573  | 0.00000  | 0.10945  | 0.00000  |
| 51 | C4 | S   | -0.02196 | 0.00000  | -0.07218 | 0.00000  | 0.02873  |
| 52 | C4 | S   | -0.41984 | 0.00000  | -0.27853 | 0.00000  | 0.06612  |
| 53 | C4 | PX  | -0.12417 | 0.00000  | -0.14353 | 0.00000  | -0.08635 |
| 54 | C4 | PY  | 0.04541  | 0.00000  | -0.21440 | 0.00000  | 0.04641  |
| 55 | C4 | PZ  | 0.00000  | -0.04182 | 0.00000  | -0.01725 | 0.00000  |
| 56 | C4 | S   | 1.86832  | 0.00000  | 2.64223  | 0.00000  | -1.64901 |
| 57 | C4 | PX  | -0.29552 | 0.00000  | -0.89041 | 0.00000  | 0.20561  |
| 58 | C4 | PY  | -0.79401 | 0.00000  | -0.73911 | 0.00000  | -0.01802 |
| 59 | C4 | PZ  | 0.00000  | -0.03483 | 0.00000  | 0.00979  | 0.00000  |
| 60 | C4 | DXX | 0.01671  | 0.00000  | 0.26047  | 0.00000  | 0.00112  |
| 61 | C4 | DYY | 0.06110  | 0.00000  | 0.25221  | 0.00000  | -0.18875 |
| 62 | C4 | DZZ | -0.12672 | 0.00000  | -0.63768 | 0.00000  | 0.20128  |
| 63 | C4 | DXY | 0.32043  | 0.00000  | 0.06615  | 0.00000  | 0.22680  |
| 64 | C4 | DXZ | 0.00000  | -0.21925 | 0.00000  | 0.12739  | 0.00000  |
| 65 | C4 | DYZ | 0.00000  | -0.07930 | 0.00000  | 0.02453  | 0.00000  |
| 66 | C5 | S   | 0.02189  | 0.00000  | 0.05951  | 0.00000  | 0.04656  |
| 67 | C5 | S   | 0.20435  | 0.00000  | 0.35880  | 0.00000  | -0.01495 |
| 68 | C5 | PX  | 0.01184  | 0.00000  | -0.25360 | 0.00000  | 0.15239  |
| 69 | C5 | PY  | -0.00841 | 0.00000  | 0.11036  | 0.00000  | 0.37138  |
| 70 | C5 | PZ  | 0.00000  | 0.03607  | 0.00000  | -0.00937 | 0.00000  |
| 71 | C5 | S   | -1.04886 | 0.00000  | -2.48083 | 0.00000  | -1.97098 |

|     |    |     |          |          |          |          |          |
|-----|----|-----|----------|----------|----------|----------|----------|
| 72  | C5 | PX  | -0.63280 | 0.00000  | -0.98136 | 0.00000  | 1.40965  |
| 73  | C5 | PY  | 0.28970  | 0.00000  | 0.67426  | 0.00000  | 1.27365  |
| 74  | C5 | PZ  | 0.00000  | 0.03277  | 0.00000  | -0.00767 | 0.00000  |
| 75  | C5 | DXX | 0.01411  | 0.00000  | -0.32674 | 0.00000  | 0.08944  |
| 76  | C5 | DYY | -0.15643 | 0.00000  | -0.05302 | 0.00000  | -0.50192 |
| 77  | C5 | DZZ | 0.14861  | 0.00000  | 0.50463  | 0.00000  | 0.44801  |
| 78  | C5 | DXY | -0.02581 | 0.00000  | 0.28957  | 0.00000  | -0.29711 |
| 79  | C5 | DXZ | 0.00000  | -0.21524 | 0.00000  | 0.15128  | 0.00000  |
| 80  | C5 | DYZ | 0.00000  | 0.15367  | 0.00000  | 0.30911  | 0.00000  |
| 81  | C6 | S   | -0.04122 | 0.00000  | 0.01665  | 0.00000  | -0.01424 |
| 82  | C6 | S   | -0.42051 | 0.00000  | 0.09400  | 0.00000  | 0.01889  |
| 83  | C6 | PX  | -0.01723 | 0.00000  | -0.08037 | 0.00000  | 0.04998  |
| 84  | C6 | PY  | 0.12241  | 0.00000  | -0.08050 | 0.00000  | -0.21090 |
| 85  | C6 | PZ  | 0.00000  | 0.05786  | 0.00000  | -0.01567 | 0.00000  |
| 86  | C6 | S   | 0.30326  | 0.00000  | -1.34429 | 0.00000  | 1.83171  |
| 87  | C6 | PX  | -0.40726 | 0.00000  | -0.90460 | 0.00000  | -0.53427 |
| 88  | C6 | PY  | 1.28408  | 0.00000  | 1.12200  | 0.00000  | 0.56502  |
| 89  | C6 | PZ  | 0.00000  | -0.06221 | 0.00000  | -0.06710 | 0.00000  |
| 90  | C6 | DXX | -0.20477 | 0.00000  | -0.03445 | 0.00000  | 0.21249  |
| 91  | C6 | DYY | 0.31698  | 0.00000  | 0.01030  | 0.00000  | -0.00910 |
| 92  | C6 | DZZ | -0.20970 | 0.00000  | 0.06222  | 0.00000  | -0.11386 |
| 93  | C6 | DXY | 0.24800  | 0.00000  | -0.01061 | 0.00000  | -0.06752 |
| 94  | C6 | DXZ | 0.00000  | -0.26106 | 0.00000  | 0.11639  | 0.00000  |
| 95  | C6 | DYZ | 0.00000  | -0.05345 | 0.00000  | 0.33632  | 0.00000  |
| 96  | C7 | S   | 0.02128  | 0.00000  | 0.01142  | 0.00000  | -0.00207 |
| 97  | C7 | S   | 0.08842  | 0.00000  | 0.24917  | 0.00000  | 0.03229  |
| 98  | C7 | PX  | 0.00963  | 0.00000  | 0.01890  | 0.00000  | -0.00579 |
| 99  | C7 | PY  | -0.00921 | 0.00000  | 0.11859  | 0.00000  | -0.04803 |
| 100 | C7 | PZ  | 0.00000  | -0.00562 | 0.00000  | -0.03790 | 0.00000  |
| 101 | C7 | S   | -0.76733 | 0.00000  | -2.18589 | 0.00000  | -0.78496 |
| 102 | C7 | PX  | 0.11592  | 0.00000  | 1.39910  | 0.00000  | -0.02549 |
| 103 | C7 | PY  | -0.38857 | 0.00000  | 0.08232  | 0.00000  | -0.42775 |
| 104 | C7 | PZ  | 0.00000  | -0.03443 | 0.00000  | -0.08312 | 0.00000  |
| 105 | C7 | DXX | 0.03400  | 0.00000  | -0.14991 | 0.00000  | -0.03763 |
| 106 | C7 | DYY | -0.14668 | 0.00000  | 0.18501  | 0.00000  | 0.03251  |
| 107 | C7 | DZZ | 0.17218  | 0.00000  | 0.00652  | 0.00000  | -0.03458 |
| 108 | C7 | DXY | -0.01386 | 0.00000  | -0.00258 | 0.00000  | 0.00126  |
| 109 | C7 | DXZ | 0.00000  | 0.03838  | 0.00000  | -0.31451 | 0.00000  |
| 110 | C7 | DYZ | 0.00000  | 0.20142  | 0.00000  | 0.14139  | 0.00000  |
| 111 | H3 | S   | -0.14745 | 0.00000  | -0.19907 | 0.00000  | 0.12223  |
| 112 | H3 | S   | 0.31744  | 0.00000  | 0.38344  | 0.00000  | 0.03787  |
| 113 | H3 | PX  | -0.27722 | 0.00000  | 0.14050  | 0.00000  | -0.27173 |
| 114 | H3 | PY  | -0.05995 | 0.00000  | -0.33295 | 0.00000  | 0.05676  |
| 115 | H3 | PZ  | 0.00000  | 0.27787  | 0.00000  | -0.07095 | 0.00000  |
| 116 | H4 | S   | 0.04625  | 0.00000  | 0.19999  | 0.00000  | 0.13884  |
| 117 | H4 | S   | -0.21203 | 0.00000  | -0.40450 | 0.00000  | -0.12272 |
| 118 | H4 | PX  | 0.38887  | 0.00000  | -0.20385 | 0.00000  | -0.13430 |
| 119 | H4 | PY  | 0.27073  | 0.00000  | 0.20700  | 0.00000  | 0.03294  |
| 120 | H4 | PZ  | 0.00000  | -0.36407 | 0.00000  | -0.20669 | 0.00000  |
| 121 | N1 | S   | -0.02263 | 0.00000  | -0.00151 | 0.00000  | 0.00580  |
| 122 | N1 | S   | -0.69843 | 0.00000  | -0.07506 | 0.00000  | 0.11891  |
| 123 | N1 | PX  | -0.12177 | 0.00000  | -0.01195 | 0.00000  | 0.04825  |
| 124 | N1 | PY  | -0.21566 | 0.00000  | 0.05864  | 0.00000  | -0.01411 |
| 125 | N1 | PZ  | 0.00000  | -0.01279 | 0.00000  | 0.03025  | 0.00000  |

|     |     |     |          |          |          |          |          |
|-----|-----|-----|----------|----------|----------|----------|----------|
| 126 | N1  | S   | 1.88877  | 0.00000  | 0.70473  | 0.00000  | -0.56244 |
| 127 | N1  | PX  | 0.67318  | 0.00000  | 0.16033  | 0.00000  | -0.15790 |
| 128 | N1  | PY  | 0.58448  | 0.00000  | -0.12580 | 0.00000  | -0.38995 |
| 129 | N1  | PZ  | 0.00000  | 0.04591  | 0.00000  | 0.04067  | 0.00000  |
| 130 | N1  | DXX | 0.10140  | 0.00000  | -0.00863 | 0.00000  | 0.10584  |
| 131 | N1  | DYY | 0.11649  | 0.00000  | -0.03566 | 0.00000  | -0.15606 |
| 132 | N1  | DZZ | -0.32409 | 0.00000  | 0.06002  | 0.00000  | 0.05665  |
| 133 | N1  | DXY | 0.19719  | 0.00000  | -0.02942 | 0.00000  | -0.24838 |
| 134 | N1  | DXZ | 0.00000  | 0.17535  | 0.00000  | -0.02629 | 0.00000  |
| 135 | N1  | DYZ | 0.00000  | -0.31348 | 0.00000  | 0.35095  | 0.00000  |
| 136 | H6  | S   | 0.14026  | 0.00000  | -0.06776 | 0.00000  | -0.13289 |
| 137 | H6  | S   | -0.10674 | 0.00000  | 0.21389  | 0.00000  | 0.14746  |
| 138 | H6  | PX  | -0.11151 | 0.00000  | 0.21451  | 0.00000  | 0.15853  |
| 139 | H6  | PY  | -0.37149 | 0.00000  | 0.07541  | 0.00000  | -0.45151 |
| 140 | H6  | PZ  | 0.00000  | -0.48866 | 0.00000  | 0.01617  | 0.00000  |
| 141 | C8  | S   | -0.01268 | 0.00000  | -0.00858 | 0.00000  | 0.01215  |
| 142 | C8  | S   | -0.05399 | 0.00000  | -0.19782 | 0.00000  | -0.06554 |
| 143 | C8  | PX  | 0.04069  | 0.00000  | 0.04504  | 0.00000  | 0.09581  |
| 144 | C8  | PY  | -0.14114 | 0.00000  | 0.04351  | 0.00000  | 0.01744  |
| 145 | C8  | PZ  | 0.00000  | -0.04123 | 0.00000  | -0.09450 | 0.00000  |
| 146 | C8  | S   | 0.44980  | 0.00000  | 0.56885  | 0.00000  | -0.50594 |
| 147 | C8  | PX  | 0.15356  | 0.00000  | 0.96643  | 0.00000  | 0.04683  |
| 148 | C8  | PY  | -0.65859 | 0.00000  | 1.27436  | 0.00000  | 0.92799  |
| 149 | C8  | PZ  | 0.00000  | -0.01438 | 0.00000  | 0.06524  | 0.00000  |
| 150 | C8  | DXX | 0.04741  | 0.00000  | 0.06827  | 0.00000  | -0.04711 |
| 151 | C8  | DYY | 0.11554  | 0.00000  | -0.05051 | 0.00000  | -0.12566 |
| 152 | C8  | DZZ | -0.10744 | 0.00000  | -0.00394 | 0.00000  | 0.14054  |
| 153 | C8  | DXY | 0.00552  | 0.00000  | 0.00825  | 0.00000  | -0.02988 |
| 154 | C8  | DXZ | 0.00000  | 0.27627  | 0.00000  | -0.09923 | 0.00000  |
| 155 | C8  | DYZ | 0.00000  | -0.03819 | 0.00000  | 0.28066  | 0.00000  |
| 156 | H8  | S   | 0.00539  | 0.00000  | 0.01868  | 0.00000  | 0.03790  |
| 157 | H8  | S   | -0.02613 | 0.00000  | -0.37774 | 0.00000  | 0.01150  |
| 158 | H8  | PX  | 0.05960  | 0.00000  | 0.00481  | 0.00000  | 0.03214  |
| 159 | H8  | PY  | 0.08063  | 0.00000  | -0.17792 | 0.00000  | 0.08916  |
| 160 | H8  | PZ  | 0.00000  | 0.07380  | 0.00000  | 0.46125  | 0.00000  |
| 161 | C10 | S   | 0.01796  | 0.00000  | -0.01448 | 0.00000  | -0.01100 |
| 162 | C10 | S   | 0.04967  | 0.00000  | -0.03399 | 0.00000  | 0.02105  |
| 163 | C10 | PX  | -0.00148 | 0.00000  | -0.02269 | 0.00000  | -0.03337 |
| 164 | C10 | PY  | -0.13088 | 0.00000  | 0.07883  | 0.00000  | 0.15357  |
| 165 | C10 | PZ  | 0.00000  | -0.01671 | 0.00000  | -0.01882 | 0.00000  |
| 166 | C10 | S   | -0.86119 | 0.00000  | 0.98955  | 0.00000  | 0.91813  |
| 167 | C10 | PX  | -0.18228 | 0.00000  | -0.29683 | 0.00000  | -0.07597 |
| 168 | C10 | PY  | -0.39744 | 0.00000  | 0.51295  | 0.00000  | 0.37314  |
| 169 | C10 | PZ  | 0.00000  | -0.02534 | 0.00000  | -0.08583 | 0.00000  |
| 170 | C10 | DXX | 0.03922  | 0.00000  | -0.01108 | 0.00000  | -0.05152 |
| 171 | C10 | DYY | -0.17959 | 0.00000  | 0.11550  | 0.00000  | 0.12765  |
| 172 | C10 | DZZ | 0.18052  | 0.00000  | -0.12758 | 0.00000  | -0.09884 |
| 173 | C10 | DXY | 0.01050  | 0.00000  | -0.06741 | 0.00000  | -0.10720 |
| 174 | C10 | DXZ | 0.00000  | 0.18881  | 0.00000  | -0.17661 | 0.00000  |
| 175 | C10 | DYZ | 0.00000  | 0.06983  | 0.00000  | 0.49385  | 0.00000  |
| 176 | H16 | S   | 0.07833  | 0.00000  | -0.03637 | 0.00000  | -0.04618 |
| 177 | H16 | S   | 0.00689  | 0.00000  | 0.19381  | 0.00000  | 0.08794  |
| 178 | H16 | PX  | 0.03185  | 0.00000  | -0.03923 | 0.00000  | -0.02963 |
| 179 | H16 | PY  | -0.02550 | 0.00000  | 0.01748  | 0.00000  | 0.10737  |

|     |     |    |          |          |          |         |          |
|-----|-----|----|----------|----------|----------|---------|----------|
| 180 | H16 | PZ | 0.00000  | -0.09590 | 0.00000  | 0.54474 | 0.00000  |
| 181 | H18 | S  | -0.01562 | 0.00000  | -0.04678 | 0.00000 | 0.01610  |
| 182 | H18 | S  | -0.02876 | 0.00000  | -0.08595 | 0.00000 | -0.10962 |
| 183 | H18 | PX | -0.06373 | 0.00000  | 0.01572  | 0.00000 | 0.03195  |
| 184 | H18 | PY | 0.05579  | 0.00000  | -0.07388 | 0.00000 | -0.13180 |
| 185 | H18 | PZ | 0.00000  | 0.28722  | 0.00000  | 0.15489 | 0.00000  |

|              |          |          |          |          |          |
|--------------|----------|----------|----------|----------|----------|
| MO:          | 146      | 147      | 148      | 149      | 150      |
| Eigenvalues: | 2.83549  | 2.86871  | 2.88238  | 2.92014  | 2.93390  |
| (ev):        | 77.15767 | 78.06173 | 78.43366 | 79.46111 | 79.83563 |

|    |    | A   | A        | A        | A        | A        |          |
|----|----|-----|----------|----------|----------|----------|----------|
| 1  | H1 | S   | -0.11053 | 0.00000  | 0.02070  | 0.02042  | 0.00000  |
| 2  | H1 | S   | -0.22806 | 0.00000  | -0.18686 | -0.10142 | 0.00000  |
| 3  | H1 | PX  | 0.02147  | 0.00000  | 0.03877  | 0.13183  | 0.00000  |
| 4  | H1 | PY  | -0.33753 | 0.00000  | 0.26944  | 0.12702  | 0.00000  |
| 5  | H1 | PZ  | 0.00000  | 0.07024  | 0.00000  | 0.00000  | 0.46301  |
| 6  | C1 | S   | -0.01175 | 0.00000  | 0.01300  | 0.03175  | 0.00000  |
| 7  | C1 | S   | 0.15017  | 0.00000  | -0.04484 | 0.05942  | 0.00000  |
| 8  | C1 | PX  | -0.12926 | 0.00000  | 0.14938  | 0.19820  | 0.00000  |
| 9  | C1 | PY  | 0.39424  | 0.00000  | 0.03088  | 0.07818  | 0.00000  |
| 10 | C1 | PZ  | 0.00000  | 0.02070  | 0.00000  | 0.00000  | 0.00216  |
| 11 | C1 | S   | 0.79627  | 0.00000  | -0.80424 | -1.09373 | 0.00000  |
| 12 | C1 | PX  | 0.36224  | 0.00000  | 0.57113  | 0.39278  | 0.00000  |
| 13 | C1 | PY  | 3.02780  | 0.00000  | -2.22389 | -0.12888 | 0.00000  |
| 14 | C1 | PZ  | 0.00000  | 0.05966  | 0.00000  | 0.00000  | -0.07591 |
| 15 | C1 | DXX | 0.04076  | 0.00000  | -0.13468 | -0.09068 | 0.00000  |
| 16 | C1 | DYY | 0.10053  | 0.00000  | -0.02451 | -0.13470 | 0.00000  |
| 17 | C1 | DZZ | -0.16760 | 0.00000  | 0.10571  | 0.23832  | 0.00000  |
| 18 | C1 | DXY | -0.55572 | 0.00000  | 0.04204  | -0.06454 | 0.00000  |
| 19 | C1 | DXZ | 0.00000  | -0.12268 | 0.00000  | 0.00000  | -0.45311 |
| 20 | C1 | DYZ | 0.00000  | 0.14675  | 0.00000  | 0.00000  | 0.00600  |
| 21 | C2 | S   | 0.03975  | 0.00000  | 0.02124  | 0.00849  | 0.00000  |
| 22 | C2 | S   | -0.01429 | 0.00000  | 0.06993  | 0.01764  | 0.00000  |
| 23 | C2 | PX  | -0.14907 | 0.00000  | -0.06280 | -0.09390 | 0.00000  |
| 24 | C2 | PY  | 0.02230  | 0.00000  | 0.18390  | -0.17506 | 0.00000  |
| 25 | C2 | PZ  | 0.00000  | -0.01910 | 0.00000  | 0.00000  | 0.01093  |
| 26 | C2 | S   | -1.30912 | 0.00000  | 0.23453  | -0.68295 | 0.00000  |
| 27 | C2 | PX  | 0.05757  | 0.00000  | -0.10038 | -0.30532 | 0.00000  |
| 28 | C2 | PY  | -0.41774 | 0.00000  | 3.41226  | -0.40653 | 0.00000  |
| 29 | C2 | PZ  | 0.00000  | -0.06268 | 0.00000  | 0.00000  | -0.04349 |
| 30 | C2 | DXX | -0.08004 | 0.00000  | -0.06033 | -0.03836 | 0.00000  |
| 31 | C2 | DYY | -0.16029 | 0.00000  | -0.01476 | -0.07945 | 0.00000  |
| 32 | C2 | DZZ | 0.30841  | 0.00000  | 0.15271  | 0.10547  | 0.00000  |
| 33 | C2 | DXY | -0.08100 | 0.00000  | 0.31022  | -0.16441 | 0.00000  |
| 34 | C2 | DXZ | 0.00000  | -0.02912 | 0.00000  | 0.00000  | 0.45540  |
| 35 | C2 | DYZ | 0.00000  | -0.18724 | 0.00000  | 0.00000  | 0.16740  |
| 36 | C3 | S   | -0.03809 | 0.00000  | -0.03552 | -0.06482 | 0.00000  |
| 37 | C3 | S   | -0.17460 | 0.00000  | -0.10277 | -0.26420 | 0.00000  |
| 38 | C3 | PX  | -0.04702 | 0.00000  | -0.05147 | -0.02265 | 0.00000  |
| 39 | C3 | PY  | 0.16156  | 0.00000  | 0.08096  | 0.18314  | 0.00000  |
| 40 | C3 | PZ  | 0.00000  | 0.04301  | 0.00000  | 0.00000  | -0.02375 |
| 41 | C3 | S   | 2.26004  | 0.00000  | 1.11753  | 2.22459  | 0.00000  |
| 42 | C3 | PX  | 0.41988  | 0.00000  | -2.52314 | 0.55554  | 0.00000  |

|    |    |     |          |          |          |          |          |
|----|----|-----|----------|----------|----------|----------|----------|
| 43 | C3 | PY  | 1.73242  | 0.00000  | -0.81150 | -0.81585 | 0.00000  |
| 44 | C3 | PZ  | 0.00000  | -0.02495 | 0.00000  | 0.00000  | 0.06028  |
| 45 | C3 | DXX | 0.13474  | 0.00000  | 0.11895  | -0.07838 | 0.00000  |
| 46 | C3 | DYY | 0.07947  | 0.00000  | 0.03404  | 0.38624  | 0.00000  |
| 47 | C3 | DZZ | -0.22205 | 0.00000  | -0.21965 | -0.43971 | 0.00000  |
| 48 | C3 | DXY | 0.29211  | 0.00000  | 0.19197  | -0.02802 | 0.00000  |
| 49 | C3 | DXZ | 0.00000  | 0.25789  | 0.00000  | 0.00000  | 0.02258  |
| 50 | C3 | DYZ | 0.00000  | -0.23038 | 0.00000  | 0.00000  | -0.14255 |
| 51 | C4 | S   | 0.01772  | 0.00000  | 0.01922  | -0.01063 | 0.00000  |
| 52 | C4 | S   | -0.12424 | 0.00000  | 0.04796  | -0.10927 | 0.00000  |
| 53 | C4 | PX  | -0.23712 | 0.00000  | 0.13826  | 0.10063  | 0.00000  |
| 54 | C4 | PY  | 0.29705  | 0.00000  | -0.10858 | -0.12421 | 0.00000  |
| 55 | C4 | PZ  | 0.00000  | -0.02071 | 0.00000  | 0.00000  | -0.01648 |
| 56 | C4 | S   | -0.75845 | 0.00000  | -0.17209 | 0.66591  | 0.00000  |
| 57 | C4 | PX  | -2.94965 | 0.00000  | 2.39084  | 0.16565  | 0.00000  |
| 58 | C4 | PY  | 1.25371  | 0.00000  | -1.18627 | -0.41084 | 0.00000  |
| 59 | C4 | PZ  | 0.00000  | -0.08589 | 0.00000  | 0.00000  | 0.04178  |
| 60 | C4 | DXX | 0.04560  | 0.00000  | -0.41867 | -0.19576 | 0.00000  |
| 61 | C4 | DYY | -0.29477 | 0.00000  | 0.30920  | 0.22646  | 0.00000  |
| 62 | C4 | DZZ | 0.22479  | 0.00000  | 0.11471  | -0.07542 | 0.00000  |
| 63 | C4 | DXY | 0.26703  | 0.00000  | -0.17396 | -0.09937 | 0.00000  |
| 64 | C4 | DXZ | 0.00000  | -0.39796 | 0.00000  | 0.00000  | 0.10176  |
| 65 | C4 | DYZ | 0.00000  | -0.09778 | 0.00000  | 0.00000  | 0.30435  |
| 66 | C5 | S   | 0.02164  | 0.00000  | -0.01320 | -0.03081 | 0.00000  |
| 67 | C5 | S   | 0.20728  | 0.00000  | 0.01569  | 0.01334  | 0.00000  |
| 68 | C5 | PX  | -0.05495 | 0.00000  | 0.21065  | -0.02140 | 0.00000  |
| 69 | C5 | PY  | -0.17561 | 0.00000  | 0.07441  | -0.11709 | 0.00000  |
| 70 | C5 | PZ  | 0.00000  | 0.02285  | 0.00000  | 0.00000  | -0.02360 |
| 71 | C5 | S   | -1.47441 | 0.00000  | -0.65738 | 0.85016  | 0.00000  |
| 72 | C5 | PX  | -1.77527 | 0.00000  | 2.85683  | -0.08818 | 0.00000  |
| 73 | C5 | PY  | -0.89437 | 0.00000  | 1.49421  | -0.40465 | 0.00000  |
| 74 | C5 | PZ  | 0.00000  | 0.10040  | 0.00000  | 0.00000  | 0.01477  |
| 75 | C5 | DXX | -0.22763 | 0.00000  | 0.21183  | 0.10569  | 0.00000  |
| 76 | C5 | DYY | 0.15597  | 0.00000  | -0.18226 | 0.12168  | 0.00000  |
| 77 | C5 | DZZ | 0.08029  | 0.00000  | -0.08020 | -0.23909 | 0.00000  |
| 78 | C5 | DXY | 0.03135  | 0.00000  | -0.09978 | 0.14188  | 0.00000  |
| 79 | C5 | DXZ | 0.00000  | -0.42890 | 0.00000  | 0.00000  | 0.03720  |
| 80 | C5 | DYZ | 0.00000  | 0.10321  | 0.00000  | 0.00000  | 0.33771  |
| 81 | C6 | S   | -0.00675 | 0.00000  | -0.01934 | 0.00402  | 0.00000  |
| 82 | C6 | S   | 0.08790  | 0.00000  | 0.05945  | 0.02751  | 0.00000  |
| 83 | C6 | PX  | -0.07532 | 0.00000  | -0.08007 | -0.03542 | 0.00000  |
| 84 | C6 | PY  | 0.06368  | 0.00000  | 0.15713  | -0.09036 | 0.00000  |
| 85 | C6 | PZ  | 0.00000  | -0.08007 | 0.00000  | 0.00000  | -0.00529 |
| 86 | C6 | S   | 0.14539  | 0.00000  | 0.30014  | -0.35577 | 0.00000  |
| 87 | C6 | PX  | -0.45831 | 0.00000  | -2.98467 | -0.02692 | 0.00000  |
| 88 | C6 | PY  | -0.36683 | 0.00000  | 1.20472  | 0.25282  | 0.00000  |
| 89 | C6 | PZ  | 0.00000  | -0.02934 | 0.00000  | 0.00000  | 0.01397  |
| 90 | C6 | DXX | -0.20936 | 0.00000  | -0.27942 | -0.09990 | 0.00000  |
| 91 | C6 | DYY | 0.19861  | 0.00000  | 0.30605  | 0.12970  | 0.00000  |
| 92 | C6 | DZZ | -0.11158 | 0.00000  | -0.17132 | 0.02989  | 0.00000  |
| 93 | C6 | DXY | -0.22459 | 0.00000  | -0.19267 | 0.15269  | 0.00000  |
| 94 | C6 | DXZ | 0.00000  | 0.31365  | 0.00000  | 0.00000  | -0.07152 |
| 95 | C6 | DYZ | 0.00000  | 0.27658  | 0.00000  | 0.00000  | -0.09723 |
| 96 | C7 | S   | 0.01815  | 0.00000  | -0.02372 | -0.02231 | 0.00000  |

|     |    |     |          |          |          |          |          |
|-----|----|-----|----------|----------|----------|----------|----------|
| 97  | C7 | S   | 0.16284  | 0.00000  | -0.09242 | -0.03607 | 0.00000  |
| 98  | C7 | PX  | 0.03417  | 0.00000  | 0.10048  | -0.05720 | 0.00000  |
| 99  | C7 | PY  | 0.09896  | 0.00000  | 0.00054  | -0.26904 | 0.00000  |
| 100 | C7 | PZ  | 0.00000  | -0.02316 | 0.00000  | 0.00000  | -0.01612 |
| 101 | C7 | S   | -0.78373 | 0.00000  | 0.54758  | -0.08009 | 0.00000  |
| 102 | C7 | PX  | 0.78379  | 0.00000  | 0.44401  | -0.68984 | 0.00000  |
| 103 | C7 | PY  | 0.67382  | 0.00000  | 0.02291  | -1.41074 | 0.00000  |
| 104 | C7 | PZ  | 0.00000  | 0.02843  | 0.00000  | 0.00000  | -0.02201 |
| 105 | C7 | DXX | -0.16415 | 0.00000  | -0.05682 | -0.10968 | 0.00000  |
| 106 | C7 | DYY | 0.07869  | 0.00000  | 0.20335  | 0.09539  | 0.00000  |
| 107 | C7 | DZZ | 0.10763  | 0.00000  | -0.14787 | -0.09940 | 0.00000  |
| 108 | C7 | DXY | -0.22588 | 0.00000  | 0.18032  | -0.02488 | 0.00000  |
| 109 | C7 | DXZ | 0.00000  | 0.12589  | 0.00000  | 0.00000  | -0.17231 |
| 110 | C7 | DYZ | 0.00000  | -0.29412 | 0.00000  | 0.00000  | -0.10595 |
| 111 | H3 | S   | 0.08370  | 0.00000  | 0.02559  | -0.03274 | 0.00000  |
| 112 | H3 | S   | 0.04401  | 0.00000  | 0.05662  | 0.13767  | 0.00000  |
| 113 | H3 | PX  | 0.50944  | 0.00000  | -0.08037 | 0.01544  | 0.00000  |
| 114 | H3 | PY  | -0.21713 | 0.00000  | -0.04681 | -0.12918 | 0.00000  |
| 115 | H3 | PZ  | 0.00000  | 0.31913  | 0.00000  | 0.00000  | -0.30932 |
| 116 | H4 | S   | 0.10025  | 0.00000  | 0.05204  | -0.02117 | 0.00000  |
| 117 | H4 | S   | 0.04565  | 0.00000  | 0.08183  | 0.07930  | 0.00000  |
| 118 | H4 | PX  | 0.25186  | 0.00000  | -0.35066 | 0.01850  | 0.00000  |
| 119 | H4 | PY  | 0.02179  | 0.00000  | -0.24867 | 0.01423  | 0.00000  |
| 120 | H4 | PZ  | 0.00000  | -0.37763 | 0.00000  | 0.00000  | -0.25126 |
| 121 | N1 | S   | 0.00587  | 0.00000  | 0.02123  | -0.01235 | 0.00000  |
| 122 | N1 | S   | 0.12488  | 0.00000  | 0.29863  | -0.17324 | 0.00000  |
| 123 | N1 | PX  | -0.06037 | 0.00000  | 0.01053  | -0.02260 | 0.00000  |
| 124 | N1 | PY  | 0.03294  | 0.00000  | -0.07011 | -0.11479 | 0.00000  |
| 125 | N1 | PZ  | 0.00000  | 0.03210  | 0.00000  | 0.00000  | -0.01366 |
| 126 | N1 | S   | -0.73325 | 0.00000  | -1.38895 | 0.69912  | 0.00000  |
| 127 | N1 | PX  | -0.22945 | 0.00000  | -0.28613 | 0.36940  | 0.00000  |
| 128 | N1 | PY  | -0.24013 | 0.00000  | 0.29609  | -0.05895 | 0.00000  |
| 129 | N1 | PZ  | 0.00000  | 0.13284  | 0.00000  | 0.00000  | 0.01844  |
| 130 | N1 | DXX | -0.19436 | 0.00000  | -0.17800 | 0.13175  | 0.00000  |
| 131 | N1 | DYY | 0.08017  | 0.00000  | -0.02444 | -0.08241 | 0.00000  |
| 132 | N1 | DZZ | 0.06770  | 0.00000  | 0.17996  | -0.11237 | 0.00000  |
| 133 | N1 | DXY | 0.05239  | 0.00000  | 0.35028  | -0.22132 | 0.00000  |
| 134 | N1 | DXZ | 0.00000  | 0.12263  | 0.00000  | 0.00000  | 0.08722  |
| 135 | N1 | DYZ | 0.00000  | 0.33324  | 0.00000  | 0.00000  | -0.09795 |
| 136 | H6 | S   | 0.15135  | 0.00000  | 0.03734  | -0.00060 | 0.00000  |
| 137 | H6 | S   | 0.00780  | 0.00000  | -0.06390 | -0.09426 | 0.00000  |
| 138 | H6 | PX  | -0.04478 | 0.00000  | -0.06916 | -0.07071 | 0.00000  |
| 139 | H6 | PY  | -0.11390 | 0.00000  | -0.39769 | 0.03534  | 0.00000  |
| 140 | H6 | PZ  | 0.00000  | 0.01303  | 0.00000  | 0.00000  | 0.45700  |
| 141 | C8 | S   | -0.01486 | 0.00000  | 0.00589  | 0.06831  | 0.00000  |
| 142 | C8 | S   | -0.03676 | 0.00000  | 0.14477  | 0.22126  | 0.00000  |
| 143 | C8 | PX  | 0.02245  | 0.00000  | -0.23703 | 0.21460  | 0.00000  |
| 144 | C8 | PY  | 0.27604  | 0.00000  | 0.28778  | 0.11960  | 0.00000  |
| 145 | C8 | PZ  | 0.00000  | 0.04041  | 0.00000  | 0.00000  | 0.03853  |
| 146 | C8 | S   | 0.23398  | 0.00000  | -0.16856 | -2.80607 | 0.00000  |
| 147 | C8 | PX  | 0.85264  | 0.00000  | -0.80599 | -0.78280 | 0.00000  |
| 148 | C8 | PY  | 1.60478  | 0.00000  | 0.97952  | -0.11731 | 0.00000  |
| 149 | C8 | PZ  | 0.00000  | -0.05577 | 0.00000  | 0.00000  | -0.02889 |
| 150 | C8 | DXX | 0.25282  | 0.00000  | 0.13283  | -0.17235 | 0.00000  |

|     |     |     |          |          |          |          |          |
|-----|-----|-----|----------|----------|----------|----------|----------|
| 151 | C8  | DYY | -0.20695 | 0.00000  | -0.19904 | -0.32876 | 0.00000  |
| 152 | C8  | DZZ | -0.02660 | 0.00000  | 0.08819  | 0.53304  | 0.00000  |
| 153 | C8  | DXY | 0.00123  | 0.00000  | 0.00886  | -0.21641 | 0.00000  |
| 154 | C8  | DXZ | 0.00000  | -0.01865 | 0.00000  | 0.00000  | -0.05179 |
| 155 | C8  | DYZ | 0.00000  | -0.12817 | 0.00000  | 0.00000  | -0.35551 |
| 156 | H8  | S   | -0.03706 | 0.00000  | -0.04622 | 0.05073  | 0.00000  |
| 157 | H8  | S   | -0.10747 | 0.00000  | -0.26485 | 0.03968  | 0.00000  |
| 158 | H8  | PX  | -0.02095 | 0.00000  | 0.07214  | 0.22539  | 0.00000  |
| 159 | H8  | PY  | -0.16453 | 0.00000  | -0.11975 | 0.59832  | 0.00000  |
| 160 | H8  | PZ  | 0.00000  | -0.22137 | 0.00000  | 0.00000  | 0.13582  |
| 161 | C10 | S   | -0.02259 | 0.00000  | -0.01991 | -0.01669 | 0.00000  |
| 162 | C10 | S   | -0.02366 | 0.00000  | -0.02737 | 0.07094  | 0.00000  |
| 163 | C10 | PX  | -0.02346 | 0.00000  | 0.15088  | -0.09240 | 0.00000  |
| 164 | C10 | PY  | 0.18777  | 0.00000  | 0.15387  | 0.35362  | 0.00000  |
| 165 | C10 | PZ  | 0.00000  | -0.00209 | 0.00000  | 0.00000  | -0.03061 |
| 166 | C10 | S   | 1.40234  | 0.00000  | 0.95979  | 0.82983  | 0.00000  |
| 167 | C10 | PX  | -0.21179 | 0.00000  | 0.57982  | 0.04295  | 0.00000  |
| 168 | C10 | PY  | 0.82486  | 0.00000  | 0.54967  | 0.37128  | 0.00000  |
| 169 | C10 | PZ  | 0.00000  | 0.03283  | 0.00000  | 0.00000  | 0.02418  |
| 170 | C10 | DXX | 0.01631  | 0.00000  | 0.03127  | -0.09997 | 0.00000  |
| 171 | C10 | DYY | 0.19631  | 0.00000  | 0.14698  | 0.21835  | 0.00000  |
| 172 | C10 | DZZ | -0.20595 | 0.00000  | -0.19667 | -0.14982 | 0.00000  |
| 173 | C10 | DXY | -0.04894 | 0.00000  | 0.24314  | -0.15876 | 0.00000  |
| 174 | C10 | DXZ | 0.00000  | -0.36593 | 0.00000  | 0.00000  | 0.07498  |
| 175 | C10 | DYZ | 0.00000  | -0.14830 | 0.00000  | 0.00000  | -0.36230 |
| 176 | H16 | S   | -0.06568 | 0.00000  | -0.05572 | -0.03034 | 0.00000  |
| 177 | H16 | S   | 0.23781  | 0.00000  | -0.20415 | 0.05861  | 0.00000  |
| 178 | H16 | PX  | -0.09401 | 0.00000  | -0.04464 | -0.13607 | 0.00000  |
| 179 | H16 | PY  | -0.05543 | 0.00000  | -0.26661 | 0.16838  | 0.00000  |
| 180 | H16 | PZ  | 0.00000  | 0.19413  | 0.00000  | 0.00000  | -0.24464 |
| 181 | H18 | S   | -0.07315 | 0.00000  | -0.05205 | 0.03652  | 0.00000  |
| 182 | H18 | S   | -0.00403 | 0.00000  | 0.39032  | -0.12180 | 0.00000  |
| 183 | H18 | PX  | 0.05352  | 0.00000  | 0.13395  | 0.07423  | 0.00000  |
| 184 | H18 | PY  | -0.14544 | 0.00000  | 0.13688  | -0.24902 | 0.00000  |
| 185 | H18 | PZ  | 0.00000  | -0.41611 | 0.00000  | 0.00000  | -0.09047 |

|              |          |          |          |          |          |
|--------------|----------|----------|----------|----------|----------|
| MO:          | 151      | 152      | 153      | 154      | 155      |
| Eigenvalues: | 2.96574  | 2.96810  | 2.99339  | 3.03725  | 3.06360  |
| (ev):        | 80.70196 | 80.76604 | 81.45435 | 82.64784 | 83.36496 |

|    |    |    |          |          |          |          |          |
|----|----|----|----------|----------|----------|----------|----------|
|    |    | A  | A        | A        | A        | A        |          |
| 1  | H1 | S  | 0.00000  | -0.10144 | 0.00000  | 0.04284  | 0.00000  |
| 2  | H1 | S  | 0.00000  | -0.11324 | 0.00000  | 0.17261  | 0.00000  |
| 3  | H1 | PX | 0.00000  | -0.09024 | 0.00000  | 0.11166  | 0.00000  |
| 4  | H1 | PY | 0.00000  | 0.40790  | 0.00000  | 0.05196  | 0.00000  |
| 5  | H1 | PZ | -0.15647 | 0.00000  | -0.11844 | 0.00000  | 0.03771  |
| 6  | C1 | S  | 0.00000  | -0.05191 | 0.00000  | -0.04369 | 0.00000  |
| 7  | C1 | S  | 0.00000  | -0.10363 | 0.00000  | -0.00939 | 0.00000  |
| 8  | C1 | PX | 0.00000  | -0.10425 | 0.00000  | -0.02531 | 0.00000  |
| 9  | C1 | PY | 0.00000  | 0.10925  | 0.00000  | 0.12020  | 0.00000  |
| 10 | C1 | PZ | -0.02838 | 0.00000  | -0.02798 | 0.00000  | -0.00284 |
| 11 | C1 | S  | 0.00000  | 1.71595  | 0.00000  | 1.53881  | 0.00000  |
| 12 | C1 | PX | 0.00000  | 0.16162  | 0.00000  | -0.92773 | 0.00000  |
| 13 | C1 | PY | 0.00000  | -2.17107 | 0.00000  | 0.25103  | 0.00000  |

|    |    |     |          |          |          |          |          |
|----|----|-----|----------|----------|----------|----------|----------|
| 14 | C1 | PZ  | 0.02592  | 0.00000  | -0.03000 | 0.00000  | 0.02778  |
| 15 | C1 | DXX | 0.00000  | -0.02236 | 0.00000  | -0.06557 | 0.00000  |
| 16 | C1 | DYY | 0.00000  | 0.25909  | 0.00000  | 0.36377  | 0.00000  |
| 17 | C1 | DZZ | 0.00000  | -0.38132 | 0.00000  | -0.30895 | 0.00000  |
| 18 | C1 | DXY | 0.00000  | -0.27671 | 0.00000  | -0.15871 | 0.00000  |
| 19 | C1 | DXZ | 0.18877  | 0.00000  | 0.18216  | 0.00000  | -0.04412 |
| 20 | C1 | DYZ | -0.23595 | 0.00000  | -0.31624 | 0.00000  | -0.33397 |
| 21 | C2 | S   | 0.00000  | -0.01022 | 0.00000  | -0.05875 | 0.00000  |
| 22 | C2 | S   | 0.00000  | -0.05522 | 0.00000  | -0.18888 | 0.00000  |
| 23 | C2 | PX  | 0.00000  | 0.18988  | 0.00000  | 0.04327  | 0.00000  |
| 24 | C2 | PY  | 0.00000  | -0.11444 | 0.00000  | 0.07653  | 0.00000  |
| 25 | C2 | PZ  | 0.02393  | 0.00000  | 0.01196  | 0.00000  | 0.03006  |
| 26 | C2 | S   | 0.00000  | 0.52893  | 0.00000  | 2.70376  | 0.00000  |
| 27 | C2 | PX  | 0.00000  | 1.24496  | 0.00000  | 1.30402  | 0.00000  |
| 28 | C2 | PY  | 0.00000  | 1.86673  | 0.00000  | -0.13977 | 0.00000  |
| 29 | C2 | PZ  | -0.00583 | 0.00000  | 0.05621  | 0.00000  | -0.04853 |
| 30 | C2 | DXX | 0.00000  | 0.18905  | 0.00000  | -0.08356 | 0.00000  |
| 31 | C2 | DYY | 0.00000  | -0.01558 | 0.00000  | 0.46878  | 0.00000  |
| 32 | C2 | DZZ | 0.00000  | -0.08034 | 0.00000  | -0.36962 | 0.00000  |
| 33 | C2 | DXY | 0.00000  | -0.23079 | 0.00000  | 0.27140  | 0.00000  |
| 34 | C2 | DXZ | 0.01751  | 0.00000  | -0.15279 | 0.00000  | 0.27508  |
| 35 | C2 | DYZ | 0.21857  | 0.00000  | 0.40058  | 0.00000  | 0.21049  |
| 36 | C3 | S   | 0.00000  | -0.03275 | 0.00000  | -0.00457 | 0.00000  |
| 37 | C3 | S   | 0.00000  | -0.34128 | 0.00000  | -0.09168 | 0.00000  |
| 38 | C3 | PX  | 0.00000  | -0.11207 | 0.00000  | -0.04710 | 0.00000  |
| 39 | C3 | PY  | 0.00000  | 0.17962  | 0.00000  | 0.00541  | 0.00000  |
| 40 | C3 | PZ  | 0.02410  | 0.00000  | -0.01896 | 0.00000  | 0.06416  |
| 41 | C3 | S   | 0.00000  | 2.11260  | 0.00000  | 0.91562  | 0.00000  |
| 42 | C3 | PX  | 0.00000  | -4.82807 | 0.00000  | 0.74212  | 0.00000  |
| 43 | C3 | PY  | 0.00000  | -1.08913 | 0.00000  | -1.74685 | 0.00000  |
| 44 | C3 | PZ  | -0.00372 | 0.00000  | 0.05096  | 0.00000  | -0.03779 |
| 45 | C3 | DXX | 0.00000  | 0.44416  | 0.00000  | -0.13317 | 0.00000  |
| 46 | C3 | DYY | 0.00000  | -0.38000 | 0.00000  | 0.08884  | 0.00000  |
| 47 | C3 | DZZ | 0.00000  | -0.09534 | 0.00000  | -0.01270 | 0.00000  |
| 48 | C3 | DXY | 0.00000  | 0.06614  | 0.00000  | -0.19480 | 0.00000  |
| 49 | C3 | DXZ | 0.03137  | 0.00000  | -0.26892 | 0.00000  | -0.22822 |
| 50 | C3 | DYZ | -0.21544 | 0.00000  | -0.06126 | 0.00000  | -0.37732 |
| 51 | C4 | S   | 0.00000  | 0.02872  | 0.00000  | 0.01229  | 0.00000  |
| 52 | C4 | S   | 0.00000  | -0.13876 | 0.00000  | -0.14923 | 0.00000  |
| 53 | C4 | PX  | 0.00000  | 0.03195  | 0.00000  | -0.26108 | 0.00000  |
| 54 | C4 | PY  | 0.00000  | 0.22814  | 0.00000  | 0.14696  | 0.00000  |
| 55 | C4 | PZ  | 0.01822  | 0.00000  | 0.01947  | 0.00000  | 0.02708  |
| 56 | C4 | S   | 0.00000  | 0.19396  | 0.00000  | -0.75450 | 0.00000  |
| 57 | C4 | PX  | 0.00000  | 1.16070  | 0.00000  | -0.37138 | 0.00000  |
| 58 | C4 | PY  | 0.00000  | -0.12232 | 0.00000  | 0.13414  | 0.00000  |
| 59 | C4 | PZ  | -0.04182 | 0.00000  | 0.02323  | 0.00000  | -0.01835 |
| 60 | C4 | DXX | 0.00000  | -0.33762 | 0.00000  | -0.13492 | 0.00000  |
| 61 | C4 | DYY | 0.00000  | 0.03980  | 0.00000  | -0.05329 | 0.00000  |
| 62 | C4 | DZZ | 0.00000  | 0.24775  | 0.00000  | 0.14327  | 0.00000  |
| 63 | C4 | DXY | 0.00000  | -0.01116 | 0.00000  | 0.23034  | 0.00000  |
| 64 | C4 | DXZ | 0.08035  | 0.00000  | 0.29317  | 0.00000  | 0.17027  |
| 65 | C4 | DYZ | -0.37152 | 0.00000  | -0.25675 | 0.00000  | -0.16704 |
| 66 | C5 | S   | 0.00000  | -0.00863 | 0.00000  | 0.00862  | 0.00000  |
| 67 | C5 | S   | 0.00000  | 0.10571  | 0.00000  | -0.00114 | 0.00000  |



|     |    |     |          |          |          |          |          |
|-----|----|-----|----------|----------|----------|----------|----------|
| 68  | C5 | PX  | 0.00000  | 0.14428  | 0.00000  | 0.23784  | 0.00000  |
| 69  | C5 | PY  | 0.00000  | 0.04240  | 0.00000  | 0.26828  | 0.00000  |
| 70  | C5 | PZ  | -0.01240 | 0.00000  | -0.02241 | 0.00000  | -0.02698 |
| 71  | C5 | S   | 0.00000  | -1.02078 | 0.00000  | -1.33898 | 0.00000  |
| 72  | C5 | PX  | 0.00000  | 1.06245  | 0.00000  | -0.07048 | 0.00000  |
| 73  | C5 | PY  | 0.00000  | 0.79549  | 0.00000  | 0.81322  | 0.00000  |
| 74  | C5 | PZ  | 0.03577  | 0.00000  | -0.03929 | 0.00000  | 0.03701  |
| 75  | C5 | DXX | 0.00000  | 0.44152  | 0.00000  | -0.15202 | 0.00000  |
| 76  | C5 | DYY | 0.00000  | -0.28717 | 0.00000  | -0.10911 | 0.00000  |
| 77  | C5 | DZZ | 0.00000  | -0.08350 | 0.00000  | 0.09974  | 0.00000  |
| 78  | C5 | DXY | 0.00000  | -0.12237 | 0.00000  | -0.10523 | 0.00000  |
| 79  | C5 | DXZ | 0.06405  | 0.00000  | 0.32563  | 0.00000  | 0.10034  |
| 80  | C5 | DYZ | 0.27076  | 0.00000  | 0.12999  | 0.00000  | 0.30742  |
| 81  | C6 | S   | 0.00000  | 0.10305  | 0.00000  | -0.00559 | 0.00000  |
| 82  | C6 | S   | 0.00000  | 0.56397  | 0.00000  | 0.34486  | 0.00000  |
| 83  | C6 | PX  | 0.00000  | -0.05613 | 0.00000  | 0.01152  | 0.00000  |
| 84  | C6 | PY  | 0.00000  | -0.23620 | 0.00000  | -0.19959 | 0.00000  |
| 85  | C6 | PZ  | -0.06014 | 0.00000  | -0.02313 | 0.00000  | 0.01563  |
| 86  | C6 | S   | 0.00000  | -3.58581 | 0.00000  | -0.32536 | 0.00000  |
| 87  | C6 | PX  | 0.00000  | -4.50515 | 0.00000  | 0.75300  | 0.00000  |
| 88  | C6 | PY  | 0.00000  | -0.19446 | 0.00000  | -1.28102 | 0.00000  |
| 89  | C6 | PZ  | -0.03933 | 0.00000  | -0.11830 | 0.00000  | 0.08571  |
| 90  | C6 | DXX | 0.00000  | -0.27285 | 0.00000  | -0.03142 | 0.00000  |
| 91  | C6 | DYY | 0.00000  | -0.18120 | 0.00000  | 0.02864  | 0.00000  |
| 92  | C6 | DZZ | 0.00000  | 0.53563  | 0.00000  | -0.12846 | 0.00000  |
| 93  | C6 | DXY | 0.00000  | 0.13179  | 0.00000  | 0.36253  | 0.00000  |
| 94  | C6 | DXZ | 0.07812  | 0.00000  | -0.27489 | 0.00000  | -0.25148 |
| 95  | C6 | DYZ | 0.35065  | 0.00000  | 0.39160  | 0.00000  | -0.14895 |
| 96  | C7 | S   | 0.00000  | -0.03662 | 0.00000  | 0.02820  | 0.00000  |
| 97  | C7 | S   | 0.00000  | 0.04462  | 0.00000  | 0.11934  | 0.00000  |
| 98  | C7 | PX  | 0.00000  | -0.04877 | 0.00000  | 0.05715  | 0.00000  |
| 99  | C7 | PY  | 0.00000  | 0.13532  | 0.00000  | -0.02290 | 0.00000  |
| 100 | C7 | PZ  | 0.00247  | 0.00000  | -0.00689 | 0.00000  | -0.03787 |
| 101 | C7 | S   | 0.00000  | -0.22510 | 0.00000  | -2.09646 | 0.00000  |
| 102 | C7 | PX  | 0.00000  | 1.46601  | 0.00000  | 0.79725  | 0.00000  |
| 103 | C7 | PY  | 0.00000  | 1.06762  | 0.00000  | -1.31788 | 0.00000  |
| 104 | C7 | PZ  | 0.01222  | 0.00000  | 0.01396  | 0.00000  | 0.01458  |
| 105 | C7 | DXX | 0.00000  | -0.09703 | 0.00000  | -0.18103 | 0.00000  |
| 106 | C7 | DYY | 0.00000  | 0.33667  | 0.00000  | -0.04162 | 0.00000  |
| 107 | C7 | DZZ | 0.00000  | -0.29153 | 0.00000  | 0.14290  | 0.00000  |
| 108 | C7 | DXY | 0.00000  | -0.05327 | 0.00000  | -0.27058 | 0.00000  |
| 109 | C7 | DXZ | -0.06288 | 0.00000  | -0.05128 | 0.00000  | 0.57538  |
| 110 | C7 | DYZ | -0.26491 | 0.00000  | 0.09523  | 0.00000  | -0.18475 |
| 111 | H3 | S   | 0.00000  | -0.05944 | 0.00000  | 0.04009  | 0.00000  |
| 112 | H3 | S   | 0.00000  | -0.16897 | 0.00000  | 0.15083  | 0.00000  |
| 113 | H3 | PX  | 0.00000  | 0.12912  | 0.00000  | 0.06635  | 0.00000  |
| 114 | H3 | PY  | 0.00000  | -0.00557 | 0.00000  | -0.18536 | 0.00000  |
| 115 | H3 | PZ  | 0.28542  | 0.00000  | 0.07657  | 0.00000  | 0.05714  |
| 116 | H4 | S   | 0.00000  | 0.03677  | 0.00000  | -0.01463 | 0.00000  |
| 117 | H4 | S   | 0.00000  | -0.00869 | 0.00000  | -0.16682 | 0.00000  |
| 118 | H4 | PX  | 0.00000  | 0.11944  | 0.00000  | -0.20603 | 0.00000  |
| 119 | H4 | PY  | 0.00000  | 0.13334  | 0.00000  | -0.14506 | 0.00000  |
| 120 | H4 | PZ  | -0.19676 | 0.00000  | 0.07134  | 0.00000  | -0.18163 |
| 121 | N1 | S   | 0.00000  | 0.01693  | 0.00000  | 0.05541  | 0.00000  |

|     |     |     |          |          |          |          |          |
|-----|-----|-----|----------|----------|----------|----------|----------|
| 122 | N1  | S   | 0.00000  | 0.16854  | 0.00000  | 0.52274  | 0.00000  |
| 123 | N1  | PX  | 0.00000  | -0.02211 | 0.00000  | -0.12490 | 0.00000  |
| 124 | N1  | PY  | 0.00000  | 0.16218  | 0.00000  | -0.09806 | 0.00000  |
| 125 | N1  | PZ  | 0.01334  | 0.00000  | 0.02656  | 0.00000  | -0.02219 |
| 126 | N1  | S   | 0.00000  | -0.74065 | 0.00000  | -3.07246 | 0.00000  |
| 127 | N1  | PX  | 0.00000  | 0.51101  | 0.00000  | -1.30857 | 0.00000  |
| 128 | N1  | PY  | 0.00000  | -1.14779 | 0.00000  | 0.57033  | 0.00000  |
| 129 | N1  | PZ  | 0.05277  | 0.00000  | 0.22610  | 0.00000  | -0.09833 |
| 130 | N1  | DXX | 0.00000  | 0.15558  | 0.00000  | -0.20476 | 0.00000  |
| 131 | N1  | DYY | 0.00000  | -0.17958 | 0.00000  | -0.33474 | 0.00000  |
| 132 | N1  | DZZ | 0.00000  | 0.06813  | 0.00000  | 0.43451  | 0.00000  |
| 133 | N1  | DXY | 0.00000  | -0.04375 | 0.00000  | 0.35997  | 0.00000  |
| 134 | N1  | DXZ | -0.01015 | 0.00000  | 0.45485  | 0.00000  | -0.12157 |
| 135 | N1  | DYZ | 0.41492  | 0.00000  | 0.01900  | 0.00000  | -0.21226 |
| 136 | H6  | S   | 0.00000  | 0.10623  | 0.00000  | 0.05143  | 0.00000  |
| 137 | H6  | S   | 0.00000  | 0.51394  | 0.00000  | 0.21081  | 0.00000  |
| 138 | H6  | PX  | 0.00000  | 0.14074  | 0.00000  | -0.08697 | 0.00000  |
| 139 | H6  | PY  | 0.00000  | -0.30450 | 0.00000  | 0.27370  | 0.00000  |
| 140 | H6  | PZ  | 0.01403  | 0.00000  | -0.15292 | 0.00000  | 0.24045  |
| 141 | C8  | S   | 0.00000  | -0.02702 | 0.00000  | -0.07298 | 0.00000  |
| 142 | C8  | S   | 0.00000  | -0.23954 | 0.00000  | 0.34454  | 0.00000  |
| 143 | C8  | PX  | 0.00000  | 0.05140  | 0.00000  | -0.12440 | 0.00000  |
| 144 | C8  | PY  | 0.00000  | -0.15670 | 0.00000  | 0.18281  | 0.00000  |
| 145 | C8  | PZ  | 0.01989  | 0.00000  | 0.01777  | 0.00000  | -0.01743 |
| 146 | C8  | S   | 0.00000  | 1.21776  | 0.00000  | 2.60202  | 0.00000  |
| 147 | C8  | PX  | 0.00000  | 1.00556  | 0.00000  | -1.29474 | 0.00000  |
| 148 | C8  | PY  | 0.00000  | 0.43033  | 0.00000  | 0.41593  | 0.00000  |
| 149 | C8  | PZ  | 0.00224  | 0.00000  | -0.08052 | 0.00000  | -0.00761 |
| 150 | C8  | DXX | 0.00000  | -0.11052 | 0.00000  | 0.28949  | 0.00000  |
| 151 | C8  | DYY | 0.00000  | 0.23182  | 0.00000  | 0.12765  | 0.00000  |
| 152 | C8  | DZZ | 0.00000  | -0.14178 | 0.00000  | -0.56500 | 0.00000  |
| 153 | C8  | DXY | 0.00000  | -0.11705 | 0.00000  | -0.19037 | 0.00000  |
| 154 | C8  | DXZ | -0.37980 | 0.00000  | 0.27175  | 0.00000  | 0.17945  |
| 155 | C8  | DYZ | -0.03058 | 0.00000  | -0.43575 | 0.00000  | 0.43524  |
| 156 | H8  | S   | 0.00000  | -0.12214 | 0.00000  | -0.06083 | 0.00000  |
| 157 | H8  | S   | 0.00000  | -0.34744 | 0.00000  | -0.24039 | 0.00000  |
| 158 | H8  | PX  | 0.00000  | -0.02252 | 0.00000  | 0.07237  | 0.00000  |
| 159 | H8  | PY  | 0.00000  | -0.06383 | 0.00000  | 0.34047  | 0.00000  |
| 160 | H8  | PZ  | -0.04280 | 0.00000  | 0.06751  | 0.00000  | -0.48019 |
| 161 | C10 | S   | 0.00000  | 0.00382  | 0.00000  | 0.02250  | 0.00000  |
| 162 | C10 | S   | 0.00000  | -0.00751 | 0.00000  | 0.05040  | 0.00000  |
| 163 | C10 | PX  | 0.00000  | -0.12974 | 0.00000  | -0.00120 | 0.00000  |
| 164 | C10 | PY  | 0.00000  | -0.14261 | 0.00000  | -0.19090 | 0.00000  |
| 165 | C10 | PZ  | -0.00752 | 0.00000  | -0.03865 | 0.00000  | 0.05357  |
| 166 | C10 | S   | 0.00000  | -0.02518 | 0.00000  | -0.72831 | 0.00000  |
| 167 | C10 | PX  | 0.00000  | -0.17086 | 0.00000  | 0.25212  | 0.00000  |
| 168 | C10 | PY  | 0.00000  | -0.11269 | 0.00000  | -0.46899 | 0.00000  |
| 169 | C10 | PZ  | -0.00289 | 0.00000  | 0.02384  | 0.00000  | 0.00966  |
| 170 | C10 | DXX | 0.00000  | -0.05039 | 0.00000  | 0.06227  | 0.00000  |
| 171 | C10 | DYY | 0.00000  | -0.04216 | 0.00000  | -0.12340 | 0.00000  |
| 172 | C10 | DZZ | 0.00000  | 0.05897  | 0.00000  | 0.16063  | 0.00000  |
| 173 | C10 | DXY | 0.00000  | -0.13092 | 0.00000  | -0.04720 | 0.00000  |
| 174 | C10 | DXZ | 0.54568  | 0.00000  | -0.32601 | 0.00000  | -0.11700 |
| 175 | C10 | DYZ | -0.09663 | 0.00000  | -0.34041 | 0.00000  | 0.37589  |

|     |     |    |          |          |          |          |         |
|-----|-----|----|----------|----------|----------|----------|---------|
| 176 | H16 | S  | 0.00000  | -0.02897 | 0.00000  | -0.01474 | 0.00000 |
| 177 | H16 | S  | 0.00000  | 0.09915  | 0.00000  | -0.12304 | 0.00000 |
| 178 | H16 | PX | 0.00000  | 0.06655  | 0.00000  | 0.13063  | 0.00000 |
| 179 | H16 | PY | 0.00000  | 0.18169  | 0.00000  | 0.05427  | 0.00000 |
| 180 | H16 | PZ | -0.44118 | 0.00000  | 0.07480  | 0.00000  | 0.22197 |
| 181 | H18 | S  | 0.00000  | 0.03815  | 0.00000  | 0.04505  | 0.00000 |
| 182 | H18 | S  | 0.00000  | -0.15009 | 0.00000  | -0.00462 | 0.00000 |
| 183 | H18 | PX | 0.00000  | -0.12762 | 0.00000  | -0.09543 | 0.00000 |
| 184 | H18 | PY | 0.00000  | -0.01797 | 0.00000  | -0.05951 | 0.00000 |
| 185 | H18 | PZ | 0.40063  | 0.00000  | -0.38140 | 0.00000  | 0.02721 |

|              |          |          |          |          |          |
|--------------|----------|----------|----------|----------|----------|
| MO:          | 156      | 157      | 158      | 159      | 160      |
| Eigenvalues: | 3.10168  | 3.10809  | 3.11390  | 3.16425  | 3.24038  |
| (ev):        | 84.40116 | 84.57542 | 84.73346 | 86.10363 | 88.17531 |

|    |    | A   | A        | A        | A        | A        |          |
|----|----|-----|----------|----------|----------|----------|----------|
| 1  | H1 | S   | -0.00322 | 0.00000  | -0.04597 | -0.01196 | -0.09994 |
| 2  | H1 | S   | -0.15890 | 0.00000  | -0.16606 | -0.24728 | -0.30053 |
| 3  | H1 | PX  | 0.02673  | 0.00000  | 0.06031  | -0.08548 | 0.22357  |
| 4  | H1 | PY  | -0.30717 | 0.00000  | -0.21101 | -0.07393 | 0.17606  |
| 5  | H1 | PZ  | 0.00000  | 0.36050  | 0.00000  | 0.00000  | 0.00000  |
| 6  | C1 | S   | 0.04125  | 0.00000  | 0.01112  | 0.06330  | 0.02191  |
| 7  | C1 | S   | 0.07058  | 0.00000  | 0.15812  | 0.26671  | 0.26050  |
| 8  | C1 | PX  | 0.10409  | 0.00000  | -0.03724 | -0.01326 | 0.19840  |
| 9  | C1 | PY  | 0.13156  | 0.00000  | 0.24268  | -0.01008 | -0.20173 |
| 10 | C1 | PZ  | 0.00000  | 0.04923  | 0.00000  | 0.00000  | 0.00000  |
| 11 | C1 | S   | -1.28251 | 0.00000  | -0.02531 | -2.66589 | -1.04844 |
| 12 | C1 | PX  | 0.60734  | 0.00000  | 0.42022  | 1.41180  | 0.89961  |
| 13 | C1 | PY  | 0.97524  | 0.00000  | 0.19250  | -0.33898 | -0.46952 |
| 14 | C1 | PZ  | 0.00000  | -0.08933 | 0.00000  | 0.00000  | 0.00000  |
| 15 | C1 | DXX | -0.02826 | 0.00000  | 0.00391  | 0.06583  | 0.04286  |
| 16 | C1 | DYY | -0.19698 | 0.00000  | 0.05079  | -0.40344 | -0.17438 |
| 17 | C1 | DZZ | 0.23389  | 0.00000  | 0.00630  | 0.36397  | 0.12182  |
| 18 | C1 | DXY | 0.10764  | 0.00000  | -0.05254 | 0.09605  | -0.08715 |
| 19 | C1 | DXZ | 0.00000  | -0.43738 | 0.00000  | 0.00000  | 0.00000  |
| 20 | C1 | DYZ | 0.00000  | -0.09539 | 0.00000  | 0.00000  | 0.00000  |
| 21 | C2 | S   | 0.02293  | 0.00000  | -0.05404 | 0.06037  | -0.02617 |
| 22 | C2 | S   | 0.01676  | 0.00000  | -0.19790 | -0.02246 | -0.27082 |
| 23 | C2 | PX  | -0.08253 | 0.00000  | 0.13550  | 0.07686  | 0.11069  |
| 24 | C2 | PY  | -0.16510 | 0.00000  | -0.18715 | -0.06714 | 0.21419  |
| 25 | C2 | PZ  | 0.00000  | -0.03927 | 0.00000  | 0.00000  | 0.00000  |
| 26 | C2 | S   | -0.81393 | 0.00000  | 1.73662  | -1.67105 | 1.81534  |
| 27 | C2 | PX  | -0.38890 | 0.00000  | 1.18042  | 0.18006  | 1.44266  |
| 28 | C2 | PY  | -0.05239 | 0.00000  | -0.38072 | 1.39754  | 1.25117  |
| 29 | C2 | PZ  | 0.00000  | 0.09654  | 0.00000  | 0.00000  | 0.00000  |
| 30 | C2 | DXX | 0.00213  | 0.00000  | 0.00274  | 0.11343  | -0.03517 |
| 31 | C2 | DYY | -0.19009 | 0.00000  | 0.18787  | -0.42597 | 0.15909  |
| 32 | C2 | DZZ | 0.17262  | 0.00000  | -0.27975 | 0.39768  | -0.13436 |
| 33 | C2 | DXY | -0.09044 | 0.00000  | 0.13370  | 0.08322  | -0.01967 |
| 34 | C2 | DXZ | 0.00000  | -0.40548 | 0.00000  | 0.00000  | 0.00000  |
| 35 | C2 | DYZ | 0.00000  | 0.01191  | 0.00000  | 0.00000  | 0.00000  |
| 36 | C3 | S   | -0.04235 | 0.00000  | -0.07093 | -0.08090 | -0.09009 |
| 37 | C3 | S   | -0.17615 | 0.00000  | -0.33415 | -0.39548 | -0.33235 |
| 38 | C3 | PX  | -0.01254 | 0.00000  | -0.06052 | 0.11433  | 0.11798  |

|    |    |     |          |          |          |          |          |
|----|----|-----|----------|----------|----------|----------|----------|
| 39 | C3 | PY  | 0.02019  | 0.00000  | -0.09878 | -0.06949 | -0.11918 |
| 40 | C3 | PZ  | 0.00000  | 0.00768  | 0.00000  | 0.00000  | 0.00000  |
| 41 | C3 | S   | 2.09528  | 0.00000  | 4.08087  | 5.82234  | 6.45633  |
| 42 | C3 | PX  | 0.49522  | 0.00000  | -1.84799 | -1.66564 | -1.54905 |
| 43 | C3 | PY  | 0.61423  | 0.00000  | -0.50432 | -0.43890 | -2.74243 |
| 44 | C3 | PZ  | 0.00000  | 0.11095  | 0.00000  | 0.00000  | 0.00000  |
| 45 | C3 | DXX | -0.10352 | 0.00000  | 0.29947  | 0.35423  | 0.11113  |
| 46 | C3 | DYY | 0.24893  | 0.00000  | 0.07236  | 0.11462  | 0.40470  |
| 47 | C3 | DZZ | -0.22275 | 0.00000  | -0.37963 | -0.41860 | -0.46393 |
| 48 | C3 | DXY | 0.37350  | 0.00000  | 0.12303  | 0.02405  | -0.53749 |
| 49 | C3 | DXZ | 0.00000  | 0.05878  | 0.00000  | 0.00000  | 0.00000  |
| 50 | C3 | DYZ | 0.00000  | -0.44161 | 0.00000  | 0.00000  | 0.00000  |
| 51 | C4 | S   | 0.01699  | 0.00000  | 0.04695  | -0.00668 | -0.05287 |
| 52 | C4 | S   | 0.01233  | 0.00000  | 0.01255  | -0.14008 | -0.11793 |
| 53 | C4 | PX  | 0.12411  | 0.00000  | -0.01567 | 0.27153  | -0.01992 |
| 54 | C4 | PY  | -0.17368 | 0.00000  | -0.03977 | -0.15174 | -0.00035 |
| 55 | C4 | PZ  | 0.00000  | -0.03188 | 0.00000  | 0.00000  | 0.00000  |
| 56 | C4 | S   | -0.33354 | 0.00000  | -0.57012 | 1.38104  | 2.18715  |
| 57 | C4 | PX  | -0.33354 | 0.00000  | 0.09424  | 0.49144  | -0.24912 |
| 58 | C4 | PY  | -0.11986 | 0.00000  | 0.07792  | -1.15662 | -1.31832 |
| 59 | C4 | PZ  | 0.00000  | 0.10216  | 0.00000  | 0.00000  | 0.00000  |
| 60 | C4 | DXX | -0.12745 | 0.00000  | -0.17278 | 0.13662  | 0.14923  |
| 61 | C4 | DYY | 0.13042  | 0.00000  | -0.07085 | 0.02638  | 0.03269  |
| 62 | C4 | DZZ | 0.08886  | 0.00000  | 0.32872  | -0.06268 | -0.27438 |
| 63 | C4 | DXY | -0.00190 | 0.00000  | 0.26265  | -0.04613 | -0.21354 |
| 64 | C4 | DXZ | 0.00000  | 0.17304  | 0.00000  | 0.00000  | 0.00000  |
| 65 | C4 | DYZ | 0.00000  | 0.35937  | 0.00000  | 0.00000  | 0.00000  |
| 66 | C5 | S   | -0.02902 | 0.00000  | -0.02830 | -0.03205 | 0.05079  |
| 67 | C5 | S   | 0.06425  | 0.00000  | -0.01662 | -0.04290 | 0.06270  |
| 68 | C5 | PX  | -0.06981 | 0.00000  | 0.11137  | -0.20752 | 0.02193  |
| 69 | C5 | PY  | -0.08972 | 0.00000  | 0.25504  | -0.05078 | 0.01596  |
| 70 | C5 | PZ  | 0.00000  | 0.03668  | 0.00000  | 0.00000  | 0.00000  |
| 71 | C5 | S   | 0.57436  | 0.00000  | -0.07607 | 0.04880  | -3.04164 |
| 72 | C5 | PX  | 0.00183  | 0.00000  | 0.01575  | 0.49385  | 0.01201  |
| 73 | C5 | PY  | -0.39285 | 0.00000  | 0.46330  | 0.14777  | 1.39279  |
| 74 | C5 | PZ  | 0.00000  | -0.09728 | 0.00000  | 0.00000  | 0.00000  |
| 75 | C5 | DXX | 0.07121  | 0.00000  | 0.18386  | 0.25499  | -0.14874 |
| 76 | C5 | DYY | 0.12105  | 0.00000  | -0.11081 | -0.04797 | -0.07546 |
| 77 | C5 | DZZ | -0.21268 | 0.00000  | -0.18496 | -0.25533 | 0.26723  |
| 78 | C5 | DXY | 0.21764  | 0.00000  | 0.11072  | 0.16587  | -0.22383 |
| 79 | C5 | DXZ | 0.00000  | 0.18686  | 0.00000  | 0.00000  | 0.00000  |
| 80 | C5 | DYZ | 0.00000  | -0.34047 | 0.00000  | 0.00000  | 0.00000  |
| 81 | C6 | S   | -0.00908 | 0.00000  | 0.10178  | 0.00925  | 0.04947  |
| 82 | C6 | S   | 0.07951  | 0.00000  | -0.04393 | 0.62688  | 0.12751  |
| 83 | C6 | PX  | 0.00846  | 0.00000  | 0.06759  | -0.28121 | 0.11157  |
| 84 | C6 | PY  | -0.01090 | 0.00000  | 0.50266  | -0.20110 | 0.13432  |
| 85 | C6 | PZ  | 0.00000  | -0.01967 | 0.00000  | 0.00000  | 0.00000  |
| 86 | C6 | S   | 0.58673  | 0.00000  | -5.76230 | -0.00973 | -3.24897 |
| 87 | C6 | PX  | -0.11432 | 0.00000  | -1.09587 | -3.37468 | -2.05486 |
| 88 | C6 | PY  | -0.11872 | 0.00000  | 0.14105  | -0.09466 | 0.55783  |
| 89 | C6 | PZ  | 0.00000  | -0.13925 | 0.00000  | 0.00000  | 0.00000  |
| 90 | C6 | DXX | -0.05376 | 0.00000  | -0.21346 | -0.17079 | -0.15397 |
| 91 | C6 | DYY | 0.05404  | 0.00000  | -0.44723 | 0.14276  | -0.20357 |
| 92 | C6 | DZZ | -0.04648 | 0.00000  | 0.73808  | -0.13097 | 0.29166  |

|     |    |     |          |          |          |          |          |
|-----|----|-----|----------|----------|----------|----------|----------|
| 93  | C6 | DXY | -0.00577 | 0.00000  | 0.05389  | -0.04725 | -0.49792 |
| 94  | C6 | DXZ | 0.00000  | 0.08339  | 0.00000  | 0.00000  | 0.00000  |
| 95  | C6 | DYZ | 0.00000  | 0.38642  | 0.00000  | 0.00000  | 0.00000  |
| 96  | C7 | S   | 0.01605  | 0.00000  | 0.03402  | 0.04915  | 0.09019  |
| 97  | C7 | S   | 0.23941  | 0.00000  | 0.23356  | 0.32288  | 0.36790  |
| 98  | C7 | PX  | 0.26477  | 0.00000  | 0.10023  | 0.00719  | 0.11069  |
| 99  | C7 | PY  | -0.08866 | 0.00000  | -0.10118 | -0.01316 | -0.27843 |
| 100 | C7 | PZ  | 0.00000  | -0.04943 | 0.00000  | 0.00000  | 0.00000  |
| 101 | C7 | S   | -0.83841 | 0.00000  | -2.37353 | -3.46258 | -6.25763 |
| 102 | C7 | PX  | 0.36948  | 0.00000  | 1.72114  | 2.01881  | 2.97569  |
| 103 | C7 | PY  | -0.20222 | 0.00000  | 0.00340  | -0.76300 | -1.31094 |
| 104 | C7 | PZ  | 0.00000  | -0.03343 | 0.00000  | 0.00000  | 0.00000  |
| 105 | C7 | DXX | -0.05764 | 0.00000  | -0.01128 | 0.00828  | -0.09776 |
| 106 | C7 | DYY | 0.15337  | 0.00000  | -0.12721 | -0.35403 | -0.55861 |
| 107 | C7 | DZZ | 0.05526  | 0.00000  | 0.17619  | 0.27660  | 0.49323  |
| 108 | C7 | DXY | 0.06834  | 0.00000  | 0.00441  | -0.10255 | -0.17683 |
| 109 | C7 | DXZ | 0.00000  | 0.22047  | 0.00000  | 0.00000  | 0.00000  |
| 110 | C7 | DYZ | 0.00000  | -0.33537 | 0.00000  | 0.00000  | 0.00000  |
| 111 | H3 | S   | 0.05756  | 0.00000  | 0.03369  | 0.03430  | 0.05916  |
| 112 | H3 | S   | 0.16952  | 0.00000  | 0.04692  | 0.20507  | 0.24678  |
| 113 | H3 | PX  | -0.04403 | 0.00000  | -0.15997 | -0.28442 | 0.07163  |
| 114 | H3 | PY  | -0.09571 | 0.00000  | -0.05899 | 0.12869  | 0.02929  |
| 115 | H3 | PZ  | 0.00000  | -0.34578 | 0.00000  | 0.00000  | 0.00000  |
| 116 | H4 | S   | 0.01783  | 0.00000  | -0.05998 | 0.00408  | 0.02810  |
| 117 | H4 | S   | 0.03928  | 0.00000  | -0.22584 | -0.02261 | -0.11353 |
| 118 | H4 | PX  | -0.06636 | 0.00000  | -0.18104 | 0.08906  | 0.06196  |
| 119 | H4 | PY  | 0.03660  | 0.00000  | 0.09539  | 0.15599  | -0.12937 |
| 120 | H4 | PZ  | 0.00000  | 0.32986  | 0.00000  | 0.00000  | 0.00000  |
| 121 | N1 | S   | 0.00454  | 0.00000  | -0.05960 | 0.05590  | -0.01917 |
| 122 | N1 | S   | 0.18266  | 0.00000  | -0.56776 | 0.66226  | 0.00088  |
| 123 | N1 | PX  | 0.00373  | 0.00000  | 0.08124  | -0.15597 | 0.08372  |
| 124 | N1 | PY  | -0.00546 | 0.00000  | 0.24194  | 0.10313  | 0.27558  |
| 125 | N1 | PZ  | 0.00000  | 0.02770  | 0.00000  | 0.00000  | 0.00000  |
| 126 | N1 | S   | -0.72344 | 0.00000  | 3.10952  | -3.41948 | 0.74553  |
| 127 | N1 | PX  | -0.28230 | 0.00000  | 1.01652  | -0.59193 | 0.17181  |
| 128 | N1 | PY  | -0.09522 | 0.00000  | 0.64783  | -0.97566 | -0.02562 |
| 129 | N1 | PZ  | 0.00000  | 0.11492  | 0.00000  | 0.00000  | 0.00000  |
| 130 | N1 | DXX | -0.24318 | 0.00000  | 0.04700  | -0.02675 | -0.18554 |
| 131 | N1 | DYY | 0.10829  | 0.00000  | 0.54385  | -0.51917 | 0.42993  |
| 132 | N1 | DZZ | 0.06965  | 0.00000  | -0.51752 | 0.42630  | -0.15170 |
| 133 | N1 | DXY | -0.04444 | 0.00000  | 0.37258  | 0.23637  | -0.03138 |
| 134 | N1 | DXZ | 0.00000  | 0.07056  | 0.00000  | 0.00000  | 0.00000  |
| 135 | N1 | DYZ | 0.00000  | 0.30658  | 0.00000  | 0.00000  | 0.00000  |
| 136 | H6 | S   | 0.00298  | 0.00000  | 0.04950  | 0.17861  | 0.15467  |
| 137 | H6 | S   | -0.10159 | 0.00000  | 0.35087  | 0.28963  | 0.43785  |
| 138 | H6 | PX  | -0.01064 | 0.00000  | 0.09662  | 0.23647  | 0.18111  |
| 139 | H6 | PY  | -0.00188 | 0.00000  | 0.33856  | 0.01263  | -0.22004 |
| 140 | H6 | PZ  | 0.00000  | -0.34321 | 0.00000  | 0.00000  | 0.00000  |
| 141 | C8 | S   | -0.05967 | 0.00000  | 0.01364  | -0.06436 | -0.03949 |
| 142 | C8 | S   | -0.09970 | 0.00000  | -0.24738 | 0.04290  | -0.32184 |
| 143 | C8 | PX  | -0.03978 | 0.00000  | 0.08714  | -0.11029 | 0.16807  |
| 144 | C8 | PY  | 0.07901  | 0.00000  | -0.10270 | -0.00720 | 0.08995  |
| 145 | C8 | PZ  | 0.00000  | 0.00448  | 0.00000  | 0.00000  | 0.00000  |
| 146 | C8 | S   | 2.42604  | 0.00000  | -0.13320 | 2.39262  | 2.56910  |

|     |     |     |          |          |          |          |          |
|-----|-----|-----|----------|----------|----------|----------|----------|
| 147 | C8  | PX  | 0.06228  | 0.00000  | 1.50871  | 0.39479  | 1.75605  |
| 148 | C8  | PY  | -0.60326 | 0.00000  | 1.04923  | 2.31403  | 1.67437  |
| 149 | C8  | PZ  | 0.00000  | -0.01927 | 0.00000  | 0.00000  | 0.00000  |
| 150 | C8  | DXX | -0.35880 | 0.00000  | 0.12320  | 0.35817  | 0.15328  |
| 151 | C8  | DYY | 0.46327  | 0.00000  | -0.05137 | 0.03302  | 0.01193  |
| 152 | C8  | DZZ | -0.31850 | 0.00000  | 0.14309  | -0.40734 | -0.13484 |
| 153 | C8  | DXY | -0.00848 | 0.00000  | 0.13459  | -0.22565 | 0.28424  |
| 154 | C8  | DXZ | 0.00000  | -0.07840 | 0.00000  | 0.00000  | 0.00000  |
| 155 | C8  | DYZ | 0.00000  | 0.08896  | 0.00000  | 0.00000  | 0.00000  |
| 156 | H8  | S   | -0.05925 | 0.00000  | -0.09298 | -0.07079 | -0.04414 |
| 157 | H8  | S   | -0.24367 | 0.00000  | -0.47330 | -0.45966 | -0.66728 |
| 158 | H8  | PX  | 0.41702  | 0.00000  | 0.09157  | -0.08755 | -0.04037 |
| 159 | H8  | PY  | -0.12922 | 0.00000  | -0.14110 | 0.02542  | 0.15366  |
| 160 | H8  | PZ  | 0.00000  | -0.21987 | 0.00000  | 0.00000  | 0.00000  |
| 161 | C10 | S   | -0.00099 | 0.00000  | -0.01047 | 0.02393  | -0.01117 |
| 162 | C10 | S   | 0.17826  | 0.00000  | -0.07830 | -0.00965 | 0.21426  |
| 163 | C10 | PX  | -0.05225 | 0.00000  | 0.02077  | -0.07469 | 0.07284  |
| 164 | C10 | PY  | -0.34341 | 0.00000  | 0.08186  | -0.03435 | -0.04373 |
| 165 | C10 | PZ  | 0.00000  | 0.01073  | 0.00000  | 0.00000  | 0.00000  |
| 166 | C10 | S   | -1.20736 | 0.00000  | 0.98471  | 0.74886  | 0.61043  |
| 167 | C10 | PX  | -0.13353 | 0.00000  | -0.56742 | -0.13367 | -0.77235 |
| 168 | C10 | PY  | -0.99874 | 0.00000  | 0.67954  | 0.31012  | 0.00806  |
| 169 | C10 | PZ  | 0.00000  | 0.00647  | 0.00000  | 0.00000  | 0.00000  |
| 170 | C10 | DXX | -0.28977 | 0.00000  | 0.10996  | 0.21716  | -0.09622 |
| 171 | C10 | DYY | 0.10114  | 0.00000  | -0.05400 | -0.22159 | 0.12323  |
| 172 | C10 | DZZ | 0.02573  | 0.00000  | -0.06537 | 0.15508  | -0.07270 |
| 173 | C10 | DXY | -0.00460 | 0.00000  | 0.02189  | -0.09338 | 0.06203  |
| 174 | C10 | DXZ | 0.00000  | 0.06394  | 0.00000  | 0.00000  | 0.00000  |
| 175 | C10 | DYZ | 0.00000  | 0.06004  | 0.00000  | 0.00000  | 0.00000  |
| 176 | H16 | S   | 0.04791  | 0.00000  | 0.04060  | -0.01524 | 0.07862  |
| 177 | H16 | S   | -0.17566 | 0.00000  | 0.30116  | 0.13444  | 0.07815  |
| 178 | H16 | PX  | 0.37724  | 0.00000  | -0.15243 | -0.08655 | 0.21017  |
| 179 | H16 | PY  | 0.32928  | 0.00000  | -0.14818 | -0.06172 | -0.00707 |
| 180 | H16 | PZ  | 0.00000  | -0.01993 | 0.00000  | 0.00000  | 0.00000  |
| 181 | H18 | S   | 0.05697  | 0.00000  | -0.14609 | -0.04314 | -0.13272 |
| 182 | H18 | S   | -0.28223 | 0.00000  | -0.01586 | -0.06191 | -0.32399 |
| 183 | H18 | PX  | -0.35839 | 0.00000  | 0.08820  | 0.00657  | -0.20229 |
| 184 | H18 | PY  | 0.31383  | 0.00000  | -0.05096 | -0.23020 | 0.17741  |
| 185 | H18 | PZ  | 0.00000  | 0.05755  | 0.00000  | 0.00000  | 0.00000  |

|              |          |          |          |          |          |
|--------------|----------|----------|----------|----------|----------|
| MO:          | 161      | 162      | 163      | 164      | 165      |
| Eigenvalues: | 3.29653  | 3.32987  | 3.34927  | 3.43269  | 3.46974  |
| (ev):        | 89.70315 | 90.61046 | 91.13834 | 93.40837 | 94.41652 |

|   |    |    |          |          |          |          |          |
|---|----|----|----------|----------|----------|----------|----------|
|   |    | A  | A        | A        | A        | A        |          |
| 1 | H1 | S  | -0.15350 | 0.01250  | 0.08817  | 0.00796  | 0.06530  |
| 2 | H1 | S  | -0.36332 | -0.02323 | 0.24145  | -0.01352 | 0.06404  |
| 3 | H1 | PX | 0.31966  | 0.02270  | -0.29923 | -0.07341 | -0.11664 |
| 4 | H1 | PY | -0.23776 | 0.03528  | 0.02582  | 0.14223  | -0.38469 |
| 5 | H1 | PZ | 0.00000  | 0.00000  | 0.00000  | 0.00000  | 0.00000  |
| 6 | C1 | S  | -0.02741 | 0.01585  | 0.04578  | 0.01242  | 0.01975  |
| 7 | C1 | S  | 0.08992  | -0.02318 | -0.23086 | -0.15274 | -0.24367 |
| 8 | C1 | PX | 0.23780  | 0.13337  | -0.06956 | 0.08287  | 0.10408  |
| 9 | C1 | PY | -0.11591 | 0.00457  | -0.15211 | 0.07035  | -0.25322 |

|    |    |     |          |          |          |          |          |
|----|----|-----|----------|----------|----------|----------|----------|
| 10 | C1 | PZ  | 0.00000  | 0.00000  | 0.00000  | 0.00000  | 0.00000  |
| 11 | C1 | S   | 0.59282  | -0.59426 | -0.58915 | 0.20250  | -0.20480 |
| 12 | C1 | PX  | 0.45979  | 0.11605  | 0.02477  | 0.11023  | -0.01204 |
| 13 | C1 | PY  | -0.20390 | 0.88140  | -0.51450 | -0.02954 | 0.86265  |
| 14 | C1 | PZ  | 0.00000  | 0.00000  | 0.00000  | 0.00000  | 0.00000  |
| 15 | C1 | DXX | -0.09553 | -0.01958 | 0.06797  | -0.01004 | -0.11315 |
| 16 | C1 | DYY | 0.17327  | -0.13241 | -0.30492 | -0.14543 | -0.06803 |
| 17 | C1 | DZZ | -0.16876 | 0.08830  | 0.31523  | 0.09489  | 0.15036  |
| 18 | C1 | DXY | 0.35859  | -0.15126 | 0.09781  | -0.29773 | 0.58569  |
| 19 | C1 | DXZ | 0.00000  | 0.00000  | 0.00000  | 0.00000  | 0.00000  |
| 20 | C1 | DYZ | 0.00000  | 0.00000  | 0.00000  | 0.00000  | 0.00000  |
| 21 | C2 | S   | -0.02052 | 0.00496  | -0.04218 | -0.03023 | -0.01386 |
| 22 | C2 | S   | -0.13333 | 0.09227  | 0.20781  | 0.27321  | 0.08513  |
| 23 | C2 | PX  | -0.15250 | 0.14006  | -0.06023 | 0.06655  | 0.02196  |
| 24 | C2 | PY  | -0.16866 | 0.03928  | 0.15293  | 0.11701  | -0.16386 |
| 25 | C2 | PZ  | 0.00000  | 0.00000  | 0.00000  | 0.00000  | 0.00000  |
| 26 | C2 | S   | 0.96541  | -0.31572 | 0.79520  | 0.26396  | 0.19828  |
| 27 | C2 | PX  | 0.85092  | -0.06667 | 0.06330  | 0.49551  | 0.15963  |
| 28 | C2 | PY  | 1.06183  | -0.48785 | 0.69813  | -0.40607 | -0.12562 |
| 29 | C2 | PZ  | 0.00000  | 0.00000  | 0.00000  | 0.00000  | 0.00000  |
| 30 | C2 | DXX | -0.01956 | 0.05765  | -0.09232 | 0.05267  | 0.11838  |
| 31 | C2 | DYY | 0.06808  | 0.00128  | 0.32372  | 0.16484  | 0.06268  |
| 32 | C2 | DZZ | -0.09290 | 0.01310  | -0.29108 | -0.20682 | -0.08278 |
| 33 | C2 | DXY | -0.33154 | -0.09737 | 0.08121  | 0.32252  | -0.49657 |
| 34 | C2 | DXZ | 0.00000  | 0.00000  | 0.00000  | 0.00000  | 0.00000  |
| 35 | C2 | DYZ | 0.00000  | 0.00000  | 0.00000  | 0.00000  | 0.00000  |
| 36 | C3 | S   | -0.03576 | -0.00679 | -0.02900 | -0.06186 | 0.00114  |
| 37 | C3 | S   | -0.11275 | 0.00455  | 0.00138  | 0.17992  | -0.34157 |
| 38 | C3 | PX  | -0.00864 | 0.10885  | -0.02706 | 0.16854  | -0.00132 |
| 39 | C3 | PY  | -0.44068 | 0.07839  | 0.09708  | -0.15075 | -0.03355 |
| 40 | C3 | PZ  | 0.00000  | 0.00000  | 0.00000  | 0.00000  | 0.00000  |
| 41 | C3 | S   | 3.04173  | 0.78799  | 1.57568  | 2.11372  | 1.48077  |
| 42 | C3 | PX  | -2.06096 | 1.35193  | -0.33333 | -0.97750 | 0.80941  |
| 43 | C3 | PY  | -0.57655 | 0.00349  | -1.38563 | -0.72389 | -0.28917 |
| 44 | C3 | PZ  | 0.00000  | 0.00000  | 0.00000  | 0.00000  | 0.00000  |
| 45 | C3 | DXX | 0.10243  | -0.44341 | 0.19850  | -0.29826 | 0.06811  |
| 46 | C3 | DYY | 0.17968  | 0.36485  | -0.09008 | 0.52613  | -0.09516 |
| 47 | C3 | DZZ | -0.17930 | -0.02351 | -0.13518 | -0.33720 | 0.00559  |
| 48 | C3 | DXY | -0.31032 | 0.11829  | 0.25848  | 0.15830  | 0.13516  |
| 49 | C3 | DXZ | 0.00000  | 0.00000  | 0.00000  | 0.00000  | 0.00000  |
| 50 | C3 | DYZ | 0.00000  | 0.00000  | 0.00000  | 0.00000  | 0.00000  |
| 51 | C4 | S   | 0.01590  | -0.01945 | -0.06707 | -0.03076 | -0.01707 |
| 52 | C4 | S   | 0.09558  | -0.11077 | 0.21917  | -0.08680 | 0.18219  |
| 53 | C4 | PX  | -0.03399 | 0.06377  | 0.06119  | 0.05502  | 0.17493  |
| 54 | C4 | PY  | -0.19231 | 0.00928  | 0.01629  | 0.04645  | -0.22744 |
| 55 | C4 | PZ  | 0.00000  | 0.00000  | 0.00000  | 0.00000  | 0.00000  |
| 56 | C4 | S   | -0.35903 | 0.53529  | 1.37813  | 0.84599  | 0.14093  |
| 57 | C4 | PX  | -0.00243 | -0.81142 | 0.10658  | -0.40801 | -0.83880 |
| 58 | C4 | PY  | -0.27256 | -0.04688 | -0.44526 | 0.01549  | 0.01393  |
| 59 | C4 | PZ  | 0.00000  | 0.00000  | 0.00000  | 0.00000  | 0.00000  |
| 60 | C4 | DXX | -0.27100 | -0.06282 | 0.24549  | -0.04807 | -0.23275 |
| 61 | C4 | DYY | 0.25093  | 0.09354  | -0.00129 | -0.01550 | 0.42150  |
| 62 | C4 | DZZ | 0.10443  | -0.10416 | -0.42202 | -0.15999 | -0.13939 |
| 63 | C4 | DXY | -0.10333 | -0.19037 | -0.23745 | -0.18198 | -0.38278 |

|     |    |     |          |          |          |          |          |
|-----|----|-----|----------|----------|----------|----------|----------|
| 64  | C4 | DXZ | 0.00000  | 0.00000  | 0.00000  | 0.00000  | 0.00000  |
| 65  | C4 | DYZ | 0.00000  | 0.00000  | 0.00000  | 0.00000  | 0.00000  |
| 66  | C5 | S   | -0.00927 | 0.01668  | 0.07296  | 0.01787  | 0.02310  |
| 67  | C5 | S   | 0.13383  | 0.06177  | -0.17640 | -0.23567 | 0.21174  |
| 68  | C5 | PX  | 0.07784  | 0.00760  | 0.07265  | 0.16726  | 0.00644  |
| 69  | C5 | PY  | -0.11591 | -0.01245 | -0.00079 | 0.14539  | -0.08595 |
| 70  | C5 | PZ  | 0.00000  | 0.00000  | 0.00000  | 0.00000  | 0.00000  |
| 71  | C5 | S   | -1.12274 | -0.44307 | -1.67115 | -0.44870 | -0.95802 |
| 72  | C5 | PX  | 0.61914  | -0.71979 | 0.14460  | -0.57596 | -0.46947 |
| 73  | C5 | PY  | 0.41292  | -0.17076 | 0.58693  | -0.20408 | 0.01447  |
| 74  | C5 | PZ  | 0.00000  | 0.00000  | 0.00000  | 0.00000  | 0.00000  |
| 75  | C5 | DXX | -0.16859 | 0.14086  | -0.21494 | 0.22553  | 0.02055  |
| 76  | C5 | DYY | 0.22376  | -0.13786 | -0.04598 | -0.35021 | 0.10768  |
| 77  | C5 | DZZ | -0.06676 | 0.08269  | 0.45090  | 0.14632  | 0.09098  |
| 78  | C5 | DXY | 0.12780  | -0.15753 | -0.27181 | -0.26827 | -0.11895 |
| 79  | C5 | DXZ | 0.00000  | 0.00000  | 0.00000  | 0.00000  | 0.00000  |
| 80  | C5 | DYZ | 0.00000  | 0.00000  | 0.00000  | 0.00000  | 0.00000  |
| 81  | C6 | S   | 0.03560  | -0.00397 | 0.02889  | 0.01568  | 0.03297  |
| 82  | C6 | S   | 0.52476  | -0.02148 | -0.25684 | 0.46219  | -0.30892 |
| 83  | C6 | PX  | -0.02330 | 0.16326  | 0.07921  | -0.10495 | 0.05663  |
| 84  | C6 | PY  | -0.40097 | -0.04282 | 0.12638  | -0.23903 | -0.00011 |
| 85  | C6 | PZ  | 0.00000  | 0.00000  | 0.00000  | 0.00000  | 0.00000  |
| 86  | C6 | S   | -0.95007 | 0.57949  | -1.51037 | -0.99512 | -0.52507 |
| 87  | C6 | PX  | -2.65540 | 0.85778  | -0.22479 | -1.04399 | 0.22076  |
| 88  | C6 | PY  | -1.17200 | 0.20465  | 1.39559  | -0.92208 | 0.32633  |
| 89  | C6 | PZ  | 0.00000  | 0.00000  | 0.00000  | 0.00000  | 0.00000  |
| 90  | C6 | DXX | -0.31399 | 0.39724  | -0.20977 | -0.07988 | 0.42165  |
| 91  | C6 | DYY | 0.22681  | -0.31841 | -0.01152 | 0.20551  | -0.48399 |
| 92  | C6 | DZZ | 0.05143  | 0.00339  | 0.24512  | -0.02832 | 0.19200  |
| 93  | C6 | DXY | 0.16418  | 0.07943  | 0.06386  | 0.52308  | 0.41867  |
| 94  | C6 | DXZ | 0.00000  | 0.00000  | 0.00000  | 0.00000  | 0.00000  |
| 95  | C6 | DYZ | 0.00000  | 0.00000  | 0.00000  | 0.00000  | 0.00000  |
| 96  | C7 | S   | 0.03160  | 0.01509  | -0.01163 | 0.02560  | 0.02527  |
| 97  | C7 | S   | 0.11683  | 0.15291  | 0.29685  | 0.07942  | 0.02078  |
| 98  | C7 | PX  | 0.03170  | 0.41012  | 0.02209  | 0.23103  | -0.13463 |
| 99  | C7 | PY  | -0.30416 | -0.12011 | -0.07357 | -0.27227 | 0.16294  |
| 100 | C7 | PZ  | 0.00000  | 0.00000  | 0.00000  | 0.00000  | 0.00000  |
| 101 | C7 | S   | -2.39291 | -0.99403 | -1.31882 | -1.82148 | -1.20207 |
| 102 | C7 | PX  | 1.72229  | 0.34972  | 0.71644  | 1.18299  | 0.13798  |
| 103 | C7 | PY  | 0.33382  | -0.62139 | -0.89049 | 0.02997  | -0.61554 |
| 104 | C7 | PZ  | 0.00000  | 0.00000  | 0.00000  | 0.00000  | 0.00000  |
| 105 | C7 | DXX | 0.29399  | -0.09258 | 0.14452  | 0.30127  | -0.19635 |
| 106 | C7 | DYY | -0.47797 | 0.09671  | 0.00377  | -0.44644 | 0.05955  |
| 107 | C7 | DZZ | 0.16134  | 0.04196  | -0.10314 | 0.12287  | 0.12247  |
| 108 | C7 | DXY | 0.35035  | -0.18312 | 0.10827  | 0.32852  | -0.11304 |
| 109 | C7 | DXZ | 0.00000  | 0.00000  | 0.00000  | 0.00000  | 0.00000  |
| 110 | C7 | DYZ | 0.00000  | 0.00000  | 0.00000  | 0.00000  | 0.00000  |
| 111 | H3 | S   | 0.08444  | 0.02843  | -0.07601 | -0.00187 | 0.01423  |
| 112 | H3 | S   | 0.21282  | 0.07503  | -0.14272 | -0.04132 | 0.10277  |
| 113 | H3 | PX  | 0.12149  | 0.15995  | 0.11716  | 0.10307  | 0.32832  |
| 114 | H3 | PY  | -0.21864 | -0.07406 | 0.23478  | -0.05667 | -0.10061 |
| 115 | H3 | PZ  | 0.00000  | 0.00000  | 0.00000  | 0.00000  | 0.00000  |
| 116 | H4 | S   | 0.06930  | -0.00754 | 0.08485  | 0.04890  | -0.03284 |
| 117 | H4 | S   | 0.12196  | -0.03135 | 0.11489  | 0.07752  | 0.00439  |



|     |     |     |          |          |          |          |          |
|-----|-----|-----|----------|----------|----------|----------|----------|
| 118 | H4  | PX  | -0.19353 | 0.19731  | 0.11151  | 0.31415  | 0.01347  |
| 119 | H4  | PY  | -0.20095 | 0.11918  | -0.22160 | 0.02106  | 0.09501  |
| 120 | H4  | PZ  | 0.00000  | 0.00000  | 0.00000  | 0.00000  | 0.00000  |
| 121 | N1  | S   | 0.01447  | -0.01202 | 0.00183  | 0.00615  | 0.00918  |
| 122 | N1  | S   | 0.13431  | 0.21212  | -0.12057 | -0.12232 | -0.07086 |
| 123 | N1  | PX  | -0.10501 | 0.13382  | -0.06998 | -0.06891 | 0.05901  |
| 124 | N1  | PY  | -0.04973 | -0.00269 | 0.07663  | -0.13660 | 0.05185  |
| 125 | N1  | PZ  | 0.00000  | 0.00000  | 0.00000  | 0.00000  | 0.00000  |
| 126 | N1  | S   | -1.21387 | -0.20524 | 0.56860  | -0.13166 | 0.03326  |
| 127 | N1  | PX  | 0.16704  | -0.24063 | -0.25106 | 0.42186  | 0.02039  |
| 128 | N1  | PY  | -1.60835 | 0.12980  | 1.14930  | -1.16450 | 0.51675  |
| 129 | N1  | PZ  | 0.00000  | 0.00000  | 0.00000  | 0.00000  | 0.00000  |
| 130 | N1  | DXX | 0.05878  | -0.02278 | -0.37090 | 0.43144  | 0.29892  |
| 131 | N1  | DYY | -0.27040 | 0.01200  | 0.34185  | -0.54677 | -0.13572 |
| 132 | N1  | DZZ | 0.09477  | -0.00577 | -0.00686 | 0.05066  | -0.02417 |
| 133 | N1  | DXY | -0.42377 | -0.01754 | 0.40234  | -0.24028 | 0.50544  |
| 134 | N1  | DXZ | 0.00000  | 0.00000  | 0.00000  | 0.00000  | 0.00000  |
| 135 | N1  | DYZ | 0.00000  | 0.00000  | 0.00000  | 0.00000  | 0.00000  |
| 136 | H6  | S   | 0.02994  | 0.01560  | -0.05948 | -0.04244 | -0.05017 |
| 137 | H6  | S   | 0.16892  | 0.04075  | -0.21190 | 0.09026  | 0.01045  |
| 138 | H6  | PX  | -0.12559 | 0.07214  | -0.25445 | -0.19984 | -0.10998 |
| 139 | H6  | PY  | -0.22205 | -0.04895 | -0.09113 | 0.27789  | -0.25362 |
| 140 | H6  | PZ  | 0.00000  | 0.00000  | 0.00000  | 0.00000  | 0.00000  |
| 141 | C8  | S   | -0.00963 | -0.04106 | -0.01918 | 0.03772  | -0.00445 |
| 142 | C8  | S   | -0.23524 | 0.32831  | 0.10703  | -0.45811 | -0.05951 |
| 143 | C8  | PX  | -0.03187 | 0.05416  | -0.16692 | 0.02955  | -0.00482 |
| 144 | C8  | PY  | -0.35682 | -0.37166 | -0.05181 | 0.03425  | 0.14501  |
| 145 | C8  | PZ  | 0.00000  | 0.00000  | 0.00000  | 0.00000  | 0.00000  |
| 146 | C8  | S   | 1.26253  | 0.59943  | 0.77477  | 0.18426  | 0.01231  |
| 147 | C8  | PX  | 1.79922  | -0.10886 | -0.54972 | 1.30781  | -0.37546 |
| 148 | C8  | PY  | 0.66722  | 0.61663  | 0.89622  | 0.09797  | 0.80932  |
| 149 | C8  | PZ  | 0.00000  | 0.00000  | 0.00000  | 0.00000  | 0.00000  |
| 150 | C8  | DXX | -0.17396 | -0.27988 | -0.09313 | 0.26459  | 0.38239  |
| 151 | C8  | DYY | 0.31136  | 0.49460  | 0.23928  | -0.31416 | -0.32175 |
| 152 | C8  | DZZ | -0.07638 | -0.30170 | -0.12774 | 0.25559  | -0.01243 |
| 153 | C8  | DXY | -0.08769 | 0.41237  | -0.54034 | 0.10545  | 0.05318  |
| 154 | C8  | DXZ | 0.00000  | 0.00000  | 0.00000  | 0.00000  | 0.00000  |
| 155 | C8  | DYZ | 0.00000  | 0.00000  | 0.00000  | 0.00000  | 0.00000  |
| 156 | H8  | S   | -0.07237 | -0.15894 | -0.13012 | -0.12353 | 0.14036  |
| 157 | H8  | S   | -0.37773 | -0.33238 | -0.38204 | -0.34802 | 0.09030  |
| 158 | H8  | PX  | -0.09386 | 0.50974  | 0.23870  | 0.07544  | -0.23154 |
| 159 | H8  | PY  | -0.35364 | -0.00697 | -0.07686 | -0.40334 | 0.20059  |
| 160 | H8  | PZ  | 0.00000  | 0.00000  | 0.00000  | 0.00000  | 0.00000  |
| 161 | C10 | S   | 0.03059  | 0.04314  | 0.00743  | -0.01664 | -0.02349 |
| 162 | C10 | S   | -0.20512 | -0.38286 | -0.12624 | 0.25233  | 0.20270  |
| 163 | C10 | PX  | -0.17032 | 0.25320  | -0.33737 | 0.08754  | 0.18019  |
| 164 | C10 | PY  | -0.11175 | -0.23178 | -0.02450 | 0.08453  | 0.05615  |
| 165 | C10 | PZ  | 0.00000  | 0.00000  | 0.00000  | 0.00000  | 0.00000  |
| 166 | C10 | S   | -0.06988 | -0.17063 | 0.30687  | 0.24374  | 0.80198  |
| 167 | C10 | PX  | -0.66070 | 0.18803  | -0.19731 | -0.37685 | 0.18752  |
| 168 | C10 | PY  | 0.08631  | 0.15535  | 0.25173  | -0.06297 | 0.21733  |
| 169 | C10 | PZ  | 0.00000  | 0.00000  | 0.00000  | 0.00000  | 0.00000  |
| 170 | C10 | DXX | 0.17769  | 0.29651  | 0.07036  | -0.04717 | 0.03968  |
| 171 | C10 | DYY | -0.34047 | -0.63107 | -0.19185 | 0.27335  | 0.19792  |

|     |     |     |          |          |          |          |          |
|-----|-----|-----|----------|----------|----------|----------|----------|
| 172 | C10 | DZZ | 0.21792  | 0.34571  | 0.07461  | -0.16318 | -0.18326 |
| 173 | C10 | DXY | -0.07733 | -0.05894 | -0.01310 | -0.01545 | -0.03749 |
| 174 | C10 | DXZ | 0.00000  | 0.00000  | 0.00000  | 0.00000  | 0.00000  |
| 175 | C10 | DYZ | 0.00000  | 0.00000  | 0.00000  | 0.00000  | 0.00000  |
| 176 | H16 | S   | 0.12676  | -0.02277 | 0.14841  | -0.07009 | -0.17748 |
| 177 | H16 | S   | 0.36952  | 0.02822  | 0.30165  | -0.02791 | -0.20534 |
| 178 | H16 | PX  | -0.27041 | -0.21083 | -0.31556 | 0.25104  | 0.28307  |
| 179 | H16 | PY  | 0.03922  | -0.29136 | 0.24491  | -0.08649 | -0.18474 |
| 180 | H16 | PZ  | 0.00000  | 0.00000  | 0.00000  | 0.00000  | 0.00000  |
| 181 | H18 | S   | -0.04755 | 0.14403  | -0.11938 | -0.06214 | -0.04428 |
| 182 | H18 | S   | -0.21612 | 0.33750  | -0.11315 | -0.22557 | 0.04895  |
| 183 | H18 | PX  | 0.06885  | 0.49516  | -0.10027 | -0.15058 | -0.06845 |
| 184 | H18 | PY  | -0.18021 | 0.01090  | -0.26191 | 0.05852  | 0.02625  |
| 185 | H18 | PZ  | 0.00000  | 0.00000  | 0.00000  | 0.00000  | 0.00000  |

|              |          |          |           |           |           |
|--------------|----------|----------|-----------|-----------|-----------|
| MO:          | 166      | 167      | 168       | 169       | 170       |
| Eigenvalues: | 3.54727  | 3.62575  | 3.69588   | 3.72333   | 3.78343   |
| (ev):        | 96.52618 | 98.66173 | 100.57002 | 101.31713 | 102.95245 |

|    |    | A   | A        | A        | A        | A        |          |
|----|----|-----|----------|----------|----------|----------|----------|
| 1  | H1 | S   | 0.19929  | 0.31260  | 0.37230  | 0.15946  | -0.00208 |
| 2  | H1 | S   | 0.14116  | 0.24642  | 0.21759  | 0.16398  | -0.00950 |
| 3  | H1 | PX  | -0.42429 | -0.49980 | -0.56892 | -0.21944 | -0.00054 |
| 4  | H1 | PY  | -0.00630 | -0.03664 | -0.04023 | 0.17623  | 0.24033  |
| 5  | H1 | PZ  | 0.00000  | 0.00000  | 0.00000  | 0.00000  | 0.00000  |
| 6  | C1 | S   | 0.03496  | 0.01121  | 0.01578  | 0.00113  | 0.01121  |
| 7  | C1 | S   | -0.03505 | -0.23979 | -0.22025 | -0.00092 | 0.08178  |
| 8  | C1 | PX  | -0.31594 | -0.26166 | -0.29377 | -0.19065 | -0.05725 |
| 9  | C1 | PY  | 0.01901  | -0.10225 | -0.12548 | 0.10104  | 0.23689  |
| 10 | C1 | PZ  | 0.00000  | 0.00000  | 0.00000  | 0.00000  | 0.00000  |
| 11 | C1 | S   | -0.63181 | 0.00643  | -0.26220 | -0.18162 | -0.24905 |
| 12 | C1 | PX  | 0.35182  | -0.28212 | -0.10134 | -0.20973 | 0.13035  |
| 13 | C1 | PY  | -0.96076 | 0.11780  | 0.22997  | -0.32517 | -0.71151 |
| 14 | C1 | PZ  | 0.00000  | 0.00000  | 0.00000  | 0.00000  | 0.00000  |
| 15 | C1 | DXX | -0.10523 | -0.33369 | -0.43654 | -0.12306 | 0.08508  |
| 16 | C1 | DYY | 0.00736  | 0.17356  | 0.22088  | 0.11572  | -0.03551 |
| 17 | C1 | DZZ | 0.19440  | 0.09957  | 0.13302  | 0.00093  | 0.02099  |
| 18 | C1 | DXY | -0.01677 | 0.05598  | 0.00634  | -0.31369 | -0.46100 |
| 19 | C1 | DXZ | 0.00000  | 0.00000  | 0.00000  | 0.00000  | 0.00000  |
| 20 | C1 | DYZ | 0.00000  | 0.00000  | 0.00000  | 0.00000  | 0.00000  |
| 21 | C2 | S   | -0.04293 | 0.01436  | -0.01050 | -0.00275 | -0.01414 |
| 22 | C2 | S   | 0.02680  | -0.16649 | 0.24096  | 0.00538  | -0.09589 |
| 23 | C2 | PX  | -0.29112 | 0.27086  | -0.33669 | -0.17252 | -0.05847 |
| 24 | C2 | PY  | -0.13189 | -0.03885 | 0.18035  | -0.14951 | -0.31280 |
| 25 | C2 | PZ  | 0.00000  | 0.00000  | 0.00000  | 0.00000  | 0.00000  |
| 26 | C2 | S   | 0.87199  | -0.22163 | 0.24772  | 0.12844  | 0.56538  |
| 27 | C2 | PX  | 0.67767  | 0.00834  | -0.09036 | -0.24127 | 0.34276  |
| 28 | C2 | PY  | 1.36433  | -0.33763 | -0.15434 | 0.32363  | 0.84374  |
| 29 | C2 | PZ  | 0.00000  | 0.00000  | 0.00000  | 0.00000  | 0.00000  |
| 30 | C2 | DXX | 0.05837  | -0.28006 | 0.45278  | 0.16649  | 0.03517  |
| 31 | C2 | DYY | 0.00431  | 0.12080  | -0.21889 | -0.15567 | -0.05528 |
| 32 | C2 | DZZ | -0.23268 | 0.10525  | -0.11598 | -0.00870 | -0.02902 |
| 33 | C2 | DXY | -0.14082 | -0.03806 | 0.24193  | -0.34671 | -0.57960 |
| 34 | C2 | DXZ | 0.00000  | 0.00000  | 0.00000  | 0.00000  | 0.00000  |

|    |    |     |          |          |          |          |          |
|----|----|-----|----------|----------|----------|----------|----------|
| 35 | C2 | DYZ | 0.00000  | 0.00000  | 0.00000  | 0.00000  | 0.00000  |
| 36 | C3 | S   | -0.06065 | 0.01669  | -0.02498 | 0.01253  | -0.03615 |
| 37 | C3 | S   | -0.40806 | 0.01497  | -0.02656 | 0.13810  | 0.06888  |
| 38 | C3 | PX  | -0.16093 | -0.02596 | -0.03724 | 0.14569  | 0.24625  |
| 39 | C3 | PY  | 0.20294  | -0.04771 | -0.09970 | -0.04197 | -0.00388 |
| 40 | C3 | PZ  | 0.00000  | 0.00000  | 0.00000  | 0.00000  | 0.00000  |
| 41 | C3 | S   | 4.17211  | -0.84778 | 0.86146  | -0.76839 | 1.41301  |
| 42 | C3 | PX  | -2.76744 | 0.42856  | -0.02928 | 0.23215  | -0.99482 |
| 43 | C3 | PY  | -1.29753 | 0.12760  | -0.13553 | -0.03559 | -0.89633 |
| 44 | C3 | PZ  | 0.00000  | 0.00000  | 0.00000  | 0.00000  | 0.00000  |
| 45 | C3 | DXX | 0.53988  | -0.02537 | -0.03605 | -0.26409 | -0.35432 |
| 46 | C3 | DYY | -0.36991 | -0.00004 | 0.07181  | 0.22946  | 0.38132  |
| 47 | C3 | DZZ | -0.21003 | 0.05270  | -0.13678 | 0.03766  | -0.17464 |
| 48 | C3 | DXY | 0.14459  | -0.03596 | -0.18655 | -0.14509 | 0.08231  |
| 49 | C3 | DXZ | 0.00000  | 0.00000  | 0.00000  | 0.00000  | 0.00000  |
| 50 | C3 | DYZ | 0.00000  | 0.00000  | 0.00000  | 0.00000  | 0.00000  |
| 51 | C4 | S   | -0.02329 | 0.03745  | 0.01467  | 0.01647  | -0.00709 |
| 52 | C4 | S   | 0.02644  | -0.34147 | -0.22111 | -0.17365 | -0.08678 |
| 53 | C4 | PX  | -0.10878 | -0.17564 | -0.14612 | -0.27536 | -0.22811 |
| 54 | C4 | PY  | 0.00754  | -0.49872 | -0.29661 | -0.06461 | 0.13858  |
| 55 | C4 | PZ  | 0.00000  | 0.00000  | 0.00000  | 0.00000  | 0.00000  |
| 56 | C4 | S   | 0.83767  | -0.50604 | 0.02048  | -0.31238 | 0.29034  |
| 57 | C4 | PX  | 0.56183  | -0.22863 | -0.42373 | 0.37640  | 0.60492  |
| 58 | C4 | PY  | -0.72697 | -0.12437 | -0.27799 | -0.28656 | -0.51560 |
| 59 | C4 | PZ  | 0.00000  | 0.00000  | 0.00000  | 0.00000  | 0.00000  |
| 60 | C4 | DXX | 0.27319  | 0.06584  | 0.02047  | 0.26313  | 0.29188  |
| 61 | C4 | DYY | -0.21300 | -0.31786 | -0.16732 | -0.40710 | -0.36302 |
| 62 | C4 | DZZ | -0.12001 | 0.24004  | 0.12877  | 0.14115  | 0.00794  |
| 63 | C4 | DXY | 0.14672  | -0.42960 | -0.37151 | 0.03688  | 0.26485  |
| 64 | C4 | DXZ | 0.00000  | 0.00000  | 0.00000  | 0.00000  | 0.00000  |
| 65 | C4 | DYZ | 0.00000  | 0.00000  | 0.00000  | 0.00000  | 0.00000  |
| 66 | C5 | S   | 0.02583  | 0.03076  | -0.02467 | -0.00843 | 0.01087  |
| 67 | C5 | S   | -0.10727 | -0.33205 | 0.23788  | 0.14348  | 0.06925  |
| 68 | C5 | PX  | -0.09161 | 0.23462  | -0.18968 | -0.26449 | -0.22718 |
| 69 | C5 | PY  | -0.10581 | -0.42795 | 0.41669  | -0.02974 | -0.20947 |
| 70 | C5 | PZ  | 0.00000  | 0.00000  | 0.00000  | 0.00000  | 0.00000  |
| 71 | C5 | S   | -1.29631 | -0.08167 | 0.03517  | 0.23514  | -0.54784 |
| 72 | C5 | PX  | 0.72863  | -0.02125 | -0.44720 | 0.37371  | 0.64862  |
| 73 | C5 | PY  | 0.70797  | -0.42198 | 0.27893  | 0.30643  | 0.58022  |
| 74 | C5 | PZ  | 0.00000  | 0.00000  | 0.00000  | 0.00000  | 0.00000  |
| 75 | C5 | DXX | -0.31144 | 0.10548  | 0.04116  | -0.24986 | -0.31649 |
| 76 | C5 | DYY | 0.26958  | -0.31890 | 0.09854  | 0.38330  | 0.42169  |
| 77 | C5 | DZZ | 0.13157  | 0.20666  | -0.17792 | -0.09780 | 0.00302  |
| 78 | C5 | DXY | 0.18737  | 0.38318  | -0.49517 | 0.03614  | 0.25202  |
| 79 | C5 | DXZ | 0.00000  | 0.00000  | 0.00000  | 0.00000  | 0.00000  |
| 80 | C5 | DYZ | 0.00000  | 0.00000  | 0.00000  | 0.00000  | 0.00000  |
| 81 | C6 | S   | 0.06913  | 0.00517  | 0.00068  | -0.00258 | 0.01829  |
| 82 | C6 | S   | 0.46877  | -0.13601 | 0.11234  | -0.12774 | -0.06467 |
| 83 | C6 | PX  | -0.21107 | 0.03272  | -0.03642 | 0.15715  | 0.17931  |
| 84 | C6 | PY  | -0.41393 | 0.03436  | 0.11183  | 0.03295  | -0.02282 |
| 85 | C6 | PZ  | 0.00000  | 0.00000  | 0.00000  | 0.00000  | 0.00000  |
| 86 | C6 | S   | -2.10320 | 0.07274  | -0.28463 | 0.43288  | -0.75468 |
| 87 | C6 | PX  | -3.40082 | 0.57973  | -0.05225 | 0.18043  | -1.11371 |
| 88 | C6 | PY  | -0.20494 | -0.04959 | -0.12628 | 0.31209  | 0.14102  |

|     |    |     |          |          |          |          |          |
|-----|----|-----|----------|----------|----------|----------|----------|
| 89  | C6 | PZ  | 0.00000  | 0.00000  | 0.00000  | 0.00000  | 0.00000  |
| 90  | C6 | DXX | -0.51797 | 0.06935  | -0.06476 | 0.31289  | 0.38819  |
| 91  | C6 | DYY | 0.43976  | -0.02611 | 0.02890  | -0.29982 | -0.43817 |
| 92  | C6 | DZZ | 0.19550  | 0.03601  | 0.01711  | 0.02648  | 0.08392  |
| 93  | C6 | DXY | 0.26381  | -0.01003 | -0.28319 | -0.04829 | 0.29077  |
| 94  | C6 | DXZ | 0.00000  | 0.00000  | 0.00000  | 0.00000  | 0.00000  |
| 95  | C6 | DYZ | 0.00000  | 0.00000  | 0.00000  | 0.00000  | 0.00000  |
| 96  | C7 | S   | 0.02500  | 0.00203  | 0.03704  | -0.04848 | 0.01372  |
| 97  | C7 | S   | 0.36116  | -0.14235 | -0.13561 | 0.07556  | -0.02796 |
| 98  | C7 | PX  | 0.13167  | -0.05748 | -0.12692 | 0.17981  | 0.09664  |
| 99  | C7 | PY  | 0.19447  | 0.00054  | -0.03257 | -0.21284 | -0.12537 |
| 100 | C7 | PZ  | 0.00000  | 0.00000  | 0.00000  | 0.00000  | 0.00000  |
| 101 | C7 | S   | -2.95775 | 0.52761  | -0.99876 | 0.98802  | -1.11660 |
| 102 | C7 | PX  | 2.08368  | -0.43144 | 0.31465  | -0.25686 | 0.75910  |
| 103 | C7 | PY  | 0.10740  | 0.06396  | -0.02317 | -0.30635 | -0.14160 |
| 104 | C7 | PZ  | 0.00000  | 0.00000  | 0.00000  | 0.00000  | 0.00000  |
| 105 | C7 | DXX | -0.24827 | -0.00753 | -0.09056 | 0.21784  | 0.11434  |
| 106 | C7 | DYY | 0.17338  | 0.04987  | -0.01529 | -0.22031 | -0.21121 |
| 107 | C7 | DZZ | 0.04149  | 0.02669  | 0.21137  | -0.23382 | 0.06821  |
| 108 | C7 | DXY | -0.43494 | 0.06041  | 0.11954  | 0.03340  | 0.16858  |
| 109 | C7 | DXZ | 0.00000  | 0.00000  | 0.00000  | 0.00000  | 0.00000  |
| 110 | C7 | DYZ | 0.00000  | 0.00000  | 0.00000  | 0.00000  | 0.00000  |
| 111 | H3 | S   | 0.02048  | 0.54539  | 0.37102  | 0.24814  | 0.04926  |
| 112 | H3 | S   | 0.08450  | 0.40519  | 0.32970  | 0.17702  | 0.06765  |
| 113 | H3 | PX  | -0.19687 | -0.33972 | -0.10980 | -0.30026 | -0.25063 |
| 114 | H3 | PY  | 0.09069  | -0.83254 | -0.54938 | -0.26326 | 0.05860  |
| 115 | H3 | PZ  | 0.00000  | 0.00000  | 0.00000  | 0.00000  | 0.00000  |
| 116 | H4 | S   | 0.09002  | 0.50698  | -0.45953 | -0.18032 | -0.00524 |
| 117 | H4 | S   | 0.08449  | 0.40309  | -0.39979 | -0.13379 | -0.00934 |
| 118 | H4 | PX  | -0.15184 | 0.45008  | -0.20691 | -0.27156 | -0.23244 |
| 119 | H4 | PY  | -0.25618 | -0.69774 | 0.67507  | 0.14957  | -0.12953 |
| 120 | H4 | PZ  | 0.00000  | 0.00000  | 0.00000  | 0.00000  | 0.00000  |
| 121 | N1 | S   | -0.00867 | 0.00525  | -0.00190 | -0.01432 | 0.04032  |
| 122 | N1 | S   | -0.04785 | -0.08667 | 0.09092  | 0.16837  | -0.03542 |
| 123 | N1 | PX  | -0.02964 | 0.00733  | -0.00422 | 0.06359  | 0.03255  |
| 124 | N1 | PY  | -0.15740 | -0.00093 | 0.08664  | 0.07106  | 0.10700  |
| 125 | N1 | PZ  | 0.00000  | 0.00000  | 0.00000  | 0.00000  | 0.00000  |
| 126 | N1 | S   | -0.15696 | 0.24117  | -0.09068 | -0.05567 | -0.52834 |
| 127 | N1 | PX  | 0.60147  | 0.00264  | -0.07990 | -0.12925 | 0.07256  |
| 128 | N1 | PY  | -1.54851 | 0.23525  | -0.04485 | 0.26101  | 0.08527  |
| 129 | N1 | PZ  | 0.00000  | 0.00000  | 0.00000  | 0.00000  | 0.00000  |
| 130 | N1 | DXX | 0.27477  | 0.00884  | -0.12465 | -0.09344 | 0.28417  |
| 131 | N1 | DYY | -0.36522 | 0.09359  | 0.11420  | 0.01749  | -0.06940 |
| 132 | N1 | DZZ | -0.02307 | 0.00207  | 0.00032  | -0.04749 | 0.12026  |
| 133 | N1 | DXY | -0.53248 | 0.02839  | -0.04816 | 0.19051  | 0.39847  |
| 134 | N1 | DXZ | 0.00000  | 0.00000  | 0.00000  | 0.00000  | 0.00000  |
| 135 | N1 | DYZ | 0.00000  | 0.00000  | 0.00000  | 0.00000  | 0.00000  |
| 136 | H6 | S   | -0.11853 | 0.26492  | -0.39071 | -0.15597 | 0.00293  |
| 137 | H6 | S   | 0.02024  | 0.16395  | -0.24530 | -0.14821 | 0.09171  |
| 138 | H6 | PX  | -0.35776 | 0.46542  | -0.62525 | -0.19180 | -0.00874 |
| 139 | H6 | PY  | -0.10921 | 0.05576  | 0.04389  | -0.22171 | -0.29369 |
| 140 | H6 | PZ  | 0.00000  | 0.00000  | 0.00000  | 0.00000  | 0.00000  |
| 141 | C8 | S   | -0.01281 | 0.00394  | -0.02988 | 0.04906  | -0.03066 |
| 142 | C8 | S   | -0.22456 | 0.02008  | -0.02205 | 0.12402  | -0.22115 |

|     |     |     |          |          |          |          |          |
|-----|-----|-----|----------|----------|----------|----------|----------|
| 143 | C8  | PX  | 0.32005  | -0.01506 | -0.02188 | -0.09536 | -0.08344 |
| 144 | C8  | PY  | -0.15121 | 0.00823  | 0.04720  | -0.14264 | 0.22127  |
| 145 | C8  | PZ  | 0.00000  | 0.00000  | 0.00000  | 0.00000  | 0.00000  |
| 146 | C8  | S   | 0.76611  | -0.23245 | 0.91722  | -1.30028 | 1.37025  |
| 147 | C8  | PX  | 1.86570  | -0.23655 | 0.32899  | -0.57046 | 0.08155  |
| 148 | C8  | PY  | 1.17629  | -0.36989 | -0.04426 | 0.51055  | 0.03199  |
| 149 | C8  | PZ  | 0.00000  | 0.00000  | 0.00000  | 0.00000  | 0.00000  |
| 150 | C8  | DXX | 0.00778  | -0.02722 | -0.06968 | 0.01598  | 0.28781  |
| 151 | C8  | DYY | 0.06687  | 0.00363  | 0.03658  | 0.10108  | -0.31739 |
| 152 | C8  | DZZ | -0.00403 | 0.00767  | -0.14330 | 0.21747  | -0.12876 |
| 153 | C8  | DXY | 0.51769  | -0.02261 | 0.01682  | -0.12069 | -0.09119 |
| 154 | C8  | DXZ | 0.00000  | 0.00000  | 0.00000  | 0.00000  | 0.00000  |
| 155 | C8  | DYZ | 0.00000  | 0.00000  | 0.00000  | 0.00000  | 0.00000  |
| 156 | H8  | S   | -0.13179 | 0.07691  | 0.17820  | -0.23725 | -0.03135 |
| 157 | H8  | S   | -0.52537 | 0.14028  | 0.03733  | -0.14474 | -0.22992 |
| 158 | H8  | PX  | 0.16804  | -0.08641 | -0.25173 | 0.29484  | -0.02498 |
| 159 | H8  | PY  | 0.09913  | 0.02785  | 0.07758  | -0.14574 | -0.13596 |
| 160 | H8  | PZ  | 0.00000  | 0.00000  | 0.00000  | 0.00000  | 0.00000  |
| 161 | C10 | S   | 0.00055  | 0.00384  | 0.03658  | -0.08374 | 0.07049  |
| 162 | C10 | S   | 0.02612  | -0.04401 | -0.21470 | 0.46573  | -0.32505 |
| 163 | C10 | PX  | 0.36630  | -0.02407 | -0.05531 | -0.18136 | 0.03292  |
| 164 | C10 | PY  | -0.06161 | 0.01805  | 0.13436  | -0.38983 | 0.44107  |
| 165 | C10 | PZ  | 0.00000  | 0.00000  | 0.00000  | 0.00000  | 0.00000  |
| 166 | C10 | S   | 0.69723  | -0.23932 | -0.61033 | 1.46613  | -0.98182 |
| 167 | C10 | PX  | -0.27519 | 0.05217  | -0.17705 | 0.10389  | -0.05229 |
| 168 | C10 | PY  | 0.21645  | -0.05637 | -0.11000 | 0.25074  | -0.08473 |
| 169 | C10 | PZ  | 0.00000  | 0.00000  | 0.00000  | 0.00000  | 0.00000  |
| 170 | C10 | DXX | 0.03240  | -0.03548 | -0.22935 | 0.62584  | -0.52658 |
| 171 | C10 | DYY | -0.06507 | 0.01704  | 0.07767  | -0.34991 | 0.44732  |
| 172 | C10 | DZZ | 0.02137  | 0.02515  | 0.23187  | -0.51318 | 0.38636  |
| 173 | C10 | DXY | -0.20779 | 0.02623  | 0.09016  | 0.06524  | 0.08218  |
| 174 | C10 | DXZ | 0.00000  | 0.00000  | 0.00000  | 0.00000  | 0.00000  |
| 175 | C10 | DYZ | 0.00000  | 0.00000  | 0.00000  | 0.00000  | 0.00000  |
| 176 | H16 | S   | -0.17989 | 0.03772  | 0.24128  | -0.34319 | 0.34631  |
| 177 | H16 | S   | -0.04822 | 0.00863  | 0.18129  | -0.25153 | 0.25110  |
| 178 | H16 | PX  | 0.25739  | -0.05010 | -0.24295 | 0.30576  | -0.31171 |
| 179 | H16 | PY  | -0.27707 | 0.04511  | 0.23717  | -0.41000 | 0.41411  |
| 180 | H16 | PZ  | 0.00000  | 0.00000  | 0.00000  | 0.00000  | 0.00000  |
| 181 | H18 | S   | 0.12973  | 0.01688  | 0.12348  | -0.51295 | 0.32499  |
| 182 | H18 | S   | -0.00395 | 0.03630  | 0.04001  | -0.28306 | 0.22572  |
| 183 | H18 | PX  | 0.24940  | 0.01640  | 0.15351  | -0.61504 | 0.36059  |
| 184 | H18 | PY  | 0.16941  | 0.01452  | 0.15910  | -0.50812 | 0.36662  |
| 185 | H18 | PZ  | 0.00000  | 0.00000  | 0.00000  | 0.00000  | 0.00000  |

|              |           |           |           |           |           |
|--------------|-----------|-----------|-----------|-----------|-----------|
| MO:          | 171       | 172       | 173       | 174       | 175       |
| Eigenvalues: | 3.88398   | 3.98232   | 4.02097   | 4.25472   | 4.46388   |
| (ev):        | 105.68842 | 108.36459 | 109.41620 | 115.77675 | 121.46844 |

|   |    |    |          |          |          |          |          |
|---|----|----|----------|----------|----------|----------|----------|
|   |    | A  | A        | A        | A        | A        |          |
| 1 | H1 | S  | 0.59034  | 0.05615  | 0.05647  | 0.42830  | 0.07508  |
| 2 | H1 | S  | 0.39235  | -0.07394 | -0.01733 | 0.28936  | 0.11206  |
| 3 | H1 | PX | -0.76336 | -0.08529 | -0.07023 | -0.46160 | -0.02514 |
| 4 | H1 | PY | -0.06689 | 0.10558  | 0.00531  | -0.07468 | -0.03939 |
| 5 | H1 | PZ | 0.00000  | 0.00000  | 0.00000  | 0.00000  | 0.00000  |

|    |    |     |          |          |          |          |          |
|----|----|-----|----------|----------|----------|----------|----------|
| 6  | C1 | S   | 0.06418  | 0.04317  | 0.03132  | 0.07110  | -0.07626 |
| 7  | C1 | S   | -0.34516 | -0.09970 | -0.07621 | -0.36666 | 0.39465  |
| 8  | C1 | PX  | -0.46223 | -0.03457 | -0.02877 | -0.31267 | -0.01946 |
| 9  | C1 | PY  | 0.01129  | 0.20484  | 0.11593  | 0.05771  | -0.10133 |
| 10 | C1 | PZ  | 0.00000  | 0.00000  | 0.00000  | 0.00000  | 0.00000  |
| 11 | C1 | S   | -0.62372 | -0.79347 | -0.54824 | -0.28202 | 0.45218  |
| 12 | C1 | PX  | -0.30999 | 0.41614  | 0.23188  | -0.35629 | -0.44302 |
| 13 | C1 | PY  | 0.02359  | -0.19158 | 0.05157  | 0.08527  | 0.34701  |
| 14 | C1 | PZ  | 0.00000  | 0.00000  | 0.00000  | 0.00000  | 0.00000  |
| 15 | C1 | DXX | -0.63061 | 0.00177  | -0.01493 | -0.44538 | -0.26257 |
| 16 | C1 | DYY | 0.59294  | 0.06387  | 0.08342  | 0.82106  | -0.20371 |
| 17 | C1 | DZZ | 0.37581  | 0.17795  | 0.12727  | 0.32592  | -0.28311 |
| 18 | C1 | DXY | -0.05641 | -0.29967 | -0.11061 | -0.03350 | 0.11796  |
| 19 | C1 | DXZ | 0.00000  | 0.00000  | 0.00000  | 0.00000  | 0.00000  |
| 20 | C1 | DYZ | 0.00000  | 0.00000  | 0.00000  | 0.00000  | 0.00000  |
| 21 | C2 | S   | 0.06603  | -0.00960 | -0.02362 | -0.07581 | -0.10285 |
| 22 | C2 | S   | -0.37893 | -0.02346 | 0.06421  | 0.38150  | 0.70404  |
| 23 | C2 | PX  | 0.47143  | -0.00026 | -0.06725 | -0.31610 | 0.04109  |
| 24 | C2 | PY  | 0.05203  | -0.05130 | -0.08057 | -0.10813 | -0.07035 |
| 25 | C2 | PZ  | 0.00000  | 0.00000  | 0.00000  | 0.00000  | 0.00000  |
| 26 | C2 | S   | -0.64883 | 0.30250  | 0.33791  | 0.45894  | 0.13882  |
| 27 | C2 | PX  | 0.30034  | 0.24266  | 0.23989  | -0.25976 | 0.03217  |
| 28 | C2 | PY  | -0.03625 | 0.37484  | 0.16118  | -0.07416 | -0.00899 |
| 29 | C2 | PZ  | 0.00000  | 0.00000  | 0.00000  | 0.00000  | 0.00000  |
| 30 | C2 | DXX | -0.63932 | -0.03137 | 0.09317  | 0.43778  | -0.42584 |
| 31 | C2 | DYY | 0.59466  | 0.01699  | -0.13671 | -0.82421 | -0.40407 |
| 32 | C2 | DZZ | 0.38776  | -0.02897 | -0.10625 | -0.34314 | -0.40358 |
| 33 | C2 | DXY | -0.08102 | -0.04900 | -0.04400 | 0.05957  | -0.08131 |
| 34 | C2 | DXZ | 0.00000  | 0.00000  | 0.00000  | 0.00000  | 0.00000  |
| 35 | C2 | DYZ | 0.00000  | 0.00000  | 0.00000  | 0.00000  | 0.00000  |
| 36 | C3 | S   | -0.02014 | -0.08595 | -0.04896 | 0.02343  | -0.23305 |
| 37 | C3 | S   | 0.06905  | 0.18835  | -0.05620 | -0.09635 | 1.56394  |
| 38 | C3 | PX  | -0.04090 | 0.01142  | -0.04680 | 0.02487  | -0.03944 |
| 39 | C3 | PY  | -0.11900 | -0.01875 | 0.08525  | -0.16670 | -0.04418 |
| 40 | C3 | PZ  | 0.00000  | 0.00000  | 0.00000  | 0.00000  | 0.00000  |
| 41 | C3 | S   | 0.23046  | 2.32965  | 1.99853  | -0.13560 | 0.25003  |
| 42 | C3 | PX  | 0.13417  | -0.52148 | -0.35558 | 0.36216  | 0.52545  |
| 43 | C3 | PY  | -0.05941 | -0.58608 | -0.36894 | -0.21081 | 0.08535  |
| 44 | C3 | PZ  | 0.00000  | 0.00000  | 0.00000  | 0.00000  | 0.00000  |
| 45 | C3 | DXX | -0.14872 | -0.41568 | -0.16521 | -0.11920 | -0.82759 |
| 46 | C3 | DYY | 0.09105  | 0.27408  | 0.04851  | 0.20472  | -0.95089 |
| 47 | C3 | DZZ | -0.10848 | -0.38913 | -0.19068 | 0.08222  | -0.92920 |
| 48 | C3 | DXY | -0.17410 | 0.28146  | 0.19780  | -0.44109 | -0.00883 |
| 49 | C3 | DXZ | 0.00000  | 0.00000  | 0.00000  | 0.00000  | 0.00000  |
| 50 | C3 | DYZ | 0.00000  | 0.00000  | 0.00000  | 0.00000  | 0.00000  |
| 51 | C4 | S   | -0.05028 | -0.02647 | -0.02028 | -0.04782 | 0.02433  |
| 52 | C4 | S   | 0.27790  | 0.00009  | 0.01389  | 0.20908  | -0.00810 |
| 53 | C4 | PX  | -0.03009 | -0.03395 | 0.04568  | 0.12753  | 0.02620  |
| 54 | C4 | PY  | 0.27500  | 0.16671  | 0.14314  | 0.33746  | -0.05693 |
| 55 | C4 | PZ  | 0.00000  | 0.00000  | 0.00000  | 0.00000  | 0.00000  |
| 56 | C4 | S   | 0.36015  | 0.78649  | 0.53193  | 0.31824  | -0.76093 |
| 57 | C4 | PX  | 0.10540  | 0.12401  | -0.05612 | 0.03584  | -0.04416 |
| 58 | C4 | PY  | 0.14098  | -0.38512 | -0.16387 | 0.33416  | 0.39589  |
| 59 | C4 | PZ  | 0.00000  | 0.00000  | 0.00000  | 0.00000  | 0.00000  |

|     |    |     |          |          |          |          |          |
|-----|----|-----|----------|----------|----------|----------|----------|
| 60  | C4 | DXX | -0.28760 | -0.01186 | -0.08480 | -0.59997 | 0.05103  |
| 61  | C4 | DYY | 0.23842  | -0.04272 | 0.08947  | 0.39016  | 0.07771  |
| 62  | C4 | DZZ | -0.26456 | -0.10897 | -0.10199 | -0.24349 | 0.08540  |
| 63  | C4 | DXY | 0.27674  | 0.20446  | 0.20279  | 0.59986  | -0.04829 |
| 64  | C4 | DXZ | 0.00000  | 0.00000  | 0.00000  | 0.00000  | 0.00000  |
| 65  | C4 | DYZ | 0.00000  | 0.00000  | 0.00000  | 0.00000  | 0.00000  |
| 66  | C5 | S   | -0.04957 | 0.00915  | 0.01832  | 0.04255  | 0.00110  |
| 67  | C5 | S   | 0.27709  | 0.01675  | -0.06554 | -0.15875 | -0.02869 |
| 68  | C5 | PX  | -0.00546 | -0.01214 | 0.03572  | 0.15230  | -0.02976 |
| 69  | C5 | PY  | 0.26320  | -0.04591 | -0.11770 | -0.32178 | -0.04637 |
| 70  | C5 | PZ  | 0.00000  | 0.00000  | 0.00000  | 0.00000  | 0.00000  |
| 71  | C5 | S   | 0.38019  | -0.59832 | -0.55902 | -0.41161 | 0.16381  |
| 72  | C5 | PX  | -0.18784 | 0.10552  | 0.00668  | 0.08554  | 0.06845  |
| 73  | C5 | PY  | 0.10074  | 0.34149  | 0.08338  | -0.28855 | -0.20530 |
| 74  | C5 | PZ  | 0.00000  | 0.00000  | 0.00000  | 0.00000  | 0.00000  |
| 75  | C5 | DXX | -0.27194 | -0.05049 | 0.07775  | 0.48639  | 0.03665  |
| 76  | C5 | DYY | 0.22823  | 0.02425  | -0.05683 | -0.31855 | 0.07830  |
| 77  | C5 | DZZ | -0.26365 | 0.03848  | 0.09234  | 0.21941  | 0.00162  |
| 78  | C5 | DXY | -0.30605 | 0.08768  | 0.21125  | 0.68704  | 0.02356  |
| 79  | C5 | DXZ | 0.00000  | 0.00000  | 0.00000  | 0.00000  | 0.00000  |
| 80  | C5 | DYZ | 0.00000  | 0.00000  | 0.00000  | 0.00000  | 0.00000  |
| 81  | C6 | S   | -0.02084 | 0.00504  | 0.01628  | -0.01357 | -0.17415 |
| 82  | C6 | S   | 0.06277  | 0.11397  | 0.15550  | 0.03019  | 1.05593  |
| 83  | C6 | PX  | 0.06151  | 0.10376  | -0.04615 | 0.01617  | 0.11900  |
| 84  | C6 | PY  | -0.11070 | 0.03590  | -0.11035 | 0.16472  | 0.19743  |
| 85  | C6 | PZ  | 0.00000  | 0.00000  | 0.00000  | 0.00000  | 0.00000  |
| 86  | C6 | S   | 0.34788  | -0.96863 | -0.57361 | 0.03931  | 2.10205  |
| 87  | C6 | PX  | -0.06300 | -0.72095 | -0.71702 | 0.40513  | 0.02730  |
| 88  | C6 | PY  | -0.13085 | 0.29444  | -0.18641 | 0.15700  | -1.01721 |
| 89  | C6 | PZ  | 0.00000  | 0.00000  | 0.00000  | 0.00000  | 0.00000  |
| 90  | C6 | DXX | -0.14449 | -0.01576 | 0.04044  | 0.21402  | -0.58775 |
| 91  | C6 | DYY | 0.08675  | -0.08555 | 0.01676  | -0.24109 | -0.83274 |
| 92  | C6 | DZZ | -0.11561 | 0.02508  | 0.01984  | -0.02634 | -0.68537 |
| 93  | C6 | DXY | 0.12266  | 0.04862  | 0.15355  | -0.37847 | -0.11895 |
| 94  | C6 | DXZ | 0.00000  | 0.00000  | 0.00000  | 0.00000  | 0.00000  |
| 95  | C6 | DYZ | 0.00000  | 0.00000  | 0.00000  | 0.00000  | 0.00000  |
| 96  | C7 | S   | -0.00221 | 0.11860  | 0.09284  | -0.04129 | -0.16804 |
| 97  | C7 | S   | -0.06143 | -0.50894 | -0.38771 | 0.19465  | 1.16955  |
| 98  | C7 | PX  | 0.09793  | -0.51158 | -0.09702 | 0.08760  | -0.06287 |
| 99  | C7 | PY  | -0.13547 | 0.02873  | 0.18409  | -0.21577 | 0.14217  |
| 100 | C7 | PZ  | 0.00000  | 0.00000  | 0.00000  | 0.00000  | 0.00000  |
| 101 | C7 | S   | -0.02249 | -2.35246 | -1.93986 | 0.01880  | 0.25270  |
| 102 | C7 | PX  | -0.00130 | 0.54071  | 0.70653  | 0.08710  | 0.00926  |
| 103 | C7 | PY  | -0.04627 | -0.22219 | -0.17838 | -0.22583 | -0.37670 |
| 104 | C7 | PZ  | 0.00000  | 0.00000  | 0.00000  | 0.00000  | 0.00000  |
| 105 | C7 | DXX | 0.14484  | -0.38889 | -0.35298 | 0.11943  | -0.74651 |
| 106 | C7 | DYY | -0.13173 | 0.44292  | 0.45946  | -0.39601 | -0.56063 |
| 107 | C7 | DZZ | -0.01335 | 0.62636  | 0.42693  | -0.17084 | -0.66489 |
| 108 | C7 | DXY | 0.00927  | 0.79797  | 0.11895  | -0.04265 | -0.01335 |
| 109 | C7 | DXZ | 0.00000  | 0.00000  | 0.00000  | 0.00000  | 0.00000  |
| 110 | C7 | DYZ | 0.00000  | 0.00000  | 0.00000  | 0.00000  | 0.00000  |
| 111 | H3 | S   | -0.32588 | -0.10895 | -0.15600 | -0.48800 | 0.00372  |
| 112 | H3 | S   | -0.22466 | -0.01452 | -0.03977 | -0.28079 | -0.06119 |
| 113 | H3 | PX  | 0.25879  | 0.00043  | 0.06202  | 0.26245  | 0.01022  |

|     |     |     |          |          |          |          |          |
|-----|-----|-----|----------|----------|----------|----------|----------|
| 114 | H3  | PY  | 0.35099  | 0.17178  | 0.19649  | 0.45826  | -0.01685 |
| 115 | H3  | PZ  | 0.00000  | 0.00000  | 0.00000  | 0.00000  | 0.00000  |
| 116 | H4  | S   | -0.32844 | 0.04346  | 0.15978  | 0.49097  | 0.00057  |
| 117 | H4  | S   | -0.22956 | -0.02438 | 0.08295  | 0.27369  | 0.06636  |
| 118 | H4  | PX  | -0.29476 | -0.01747 | 0.08437  | 0.29150  | -0.00226 |
| 119 | H4  | PY  | 0.32502  | -0.08041 | -0.17635 | -0.43655 | 0.02172  |
| 120 | H4  | PZ  | 0.00000  | 0.00000  | 0.00000  | 0.00000  | 0.00000  |
| 121 | N1  | S   | 0.01284  | 0.00508  | -0.01174 | 0.00373  | 0.34116  |
| 122 | N1  | S   | -0.12080 | -0.03385 | 0.08131  | 0.11228  | -0.28589 |
| 123 | N1  | PX  | -0.02233 | -0.02570 | 0.09055  | 0.02522  | 0.20610  |
| 124 | N1  | PY  | -0.07838 | 0.04012  | -0.09382 | 0.16536  | 0.13989  |
| 125 | N1  | PZ  | 0.00000  | 0.00000  | 0.00000  | 0.00000  | 0.00000  |
| 126 | N1  | S   | -0.02228 | 0.07332  | -0.03474 | -0.03722 | -4.34292 |
| 127 | N1  | PX  | 0.07847  | -0.01978 | 0.18444  | -0.15872 | -0.94587 |
| 128 | N1  | PY  | -0.16738 | -0.03095 | -0.47980 | 0.28956  | -0.30025 |
| 129 | N1  | PZ  | 0.00000  | 0.00000  | 0.00000  | 0.00000  | 0.00000  |
| 130 | N1  | DXX | 0.09572  | -0.18571 | 0.19715  | -0.11058 | 1.02900  |
| 131 | N1  | DYY | -0.01607 | 0.21717  | -0.20243 | 0.15281  | 1.13932  |
| 132 | N1  | DZZ | 0.03688  | 0.01399  | -0.02740 | 0.01662  | 1.08366  |
| 133 | N1  | DXY | -0.11962 | 0.02731  | -0.17836 | 0.14863  | 0.00893  |
| 134 | N1  | DXZ | 0.00000  | 0.00000  | 0.00000  | 0.00000  | 0.00000  |
| 135 | N1  | DYZ | 0.00000  | 0.00000  | 0.00000  | 0.00000  | 0.00000  |
| 136 | H6  | S   | 0.60353  | 0.02922  | -0.07821 | -0.42958 | 0.08036  |
| 137 | H6  | S   | 0.40042  | 0.05113  | 0.02885  | -0.27004 | -0.03173 |
| 138 | H6  | PX  | 0.79459  | 0.00799  | -0.11685 | -0.47491 | 0.05893  |
| 139 | H6  | PY  | 0.00574  | -0.02948 | -0.00335 | 0.00943  | 0.00655  |
| 140 | H6  | PZ  | 0.00000  | 0.00000  | 0.00000  | 0.00000  | 0.00000  |
| 141 | C8  | S   | 0.01522  | -0.02050 | -0.02037 | 0.00141  | -0.06109 |
| 142 | C8  | S   | -0.08253 | 0.04808  | -0.00522 | -0.00330 | 0.50255  |
| 143 | C8  | PX  | 0.02085  | -0.08420 | 0.00377  | -0.03489 | 0.11977  |
| 144 | C8  | PY  | -0.01722 | -0.19453 | -0.10216 | 0.04772  | -0.05327 |
| 145 | C8  | PZ  | 0.00000  | 0.00000  | 0.00000  | 0.00000  | 0.00000  |
| 146 | C8  | S   | -0.14649 | 0.75765  | 0.52804  | 0.11644  | 0.80602  |
| 147 | C8  | PX  | 0.13426  | 0.37708  | 0.83956  | -0.21032 | -0.84051 |
| 148 | C8  | PY  | -0.21952 | 0.59195  | 0.47097  | 0.14438  | 0.65665  |
| 149 | C8  | PZ  | 0.00000  | 0.00000  | 0.00000  | 0.00000  | 0.00000  |
| 150 | C8  | DXX | 0.02192  | -0.42340 | -0.10368 | 0.08795  | -0.32010 |
| 151 | C8  | DYY | -0.00865 | 0.43779  | 0.08416  | -0.05339 | -0.23515 |
| 152 | C8  | DZZ | 0.07195  | -0.11627 | -0.08690 | 0.00420  | -0.28104 |
| 153 | C8  | DXY | 0.04375  | -0.25231 | 0.66129  | -0.15708 | 0.16768  |
| 154 | C8  | DXZ | 0.00000  | 0.00000  | 0.00000  | 0.00000  | 0.00000  |
| 155 | C8  | DYZ | 0.00000  | 0.00000  | 0.00000  | 0.00000  | 0.00000  |
| 156 | H8  | S   | -0.08100 | 0.70495  | 0.31812  | -0.14606 | 0.11677  |
| 157 | H8  | S   | -0.05492 | 0.24695  | -0.00644 | -0.13622 | -0.13297 |
| 158 | H8  | PX  | 0.10490  | -0.89229 | -0.36824 | 0.14730  | -0.08586 |
| 159 | H8  | PY  | -0.07810 | 0.23517  | 0.22412  | -0.08769 | 0.06053  |
| 160 | H8  | PZ  | 0.00000  | 0.00000  | 0.00000  | 0.00000  | 0.00000  |
| 161 | C10 | S   | 0.00286  | -0.02927 | -0.00087 | 0.00187  | -0.06292 |
| 162 | C10 | S   | 0.00094  | 0.02682  | -0.02708 | 0.01746  | 0.38173  |
| 163 | C10 | PX  | -0.04952 | 0.32397  | -0.67028 | 0.08039  | -0.00772 |
| 164 | C10 | PY  | 0.01891  | -0.33768 | -0.06290 | 0.04366  | 0.00063  |
| 165 | C10 | PZ  | 0.00000  | 0.00000  | 0.00000  | 0.00000  | 0.00000  |
| 166 | C10 | S   | -0.13940 | 0.49656  | 0.25883  | 0.03086  | 0.40621  |
| 167 | C10 | PX  | -0.10602 | 0.10427  | -0.64659 | 0.05060  | 0.24562  |



|     |     |     |          |          |          |          |          |
|-----|-----|-----|----------|----------|----------|----------|----------|
| 168 | C10 | PY  | -0.05041 | 0.04639  | 0.08032  | 0.02507  | 0.08804  |
| 169 | C10 | PZ  | 0.00000  | 0.00000  | 0.00000  | 0.00000  | 0.00000  |
| 170 | C10 | DXX | -0.01019 | 0.18573  | 0.23353  | -0.05444 | -0.20394 |
| 171 | C10 | DYY | 0.01466  | -0.27872 | -0.24437 | 0.06244  | -0.26946 |
| 172 | C10 | DZZ | 0.01105  | -0.12648 | 0.00439  | 0.00466  | -0.25136 |
| 173 | C10 | DXY | 0.07594  | -0.61583 | 1.13621  | -0.15819 | 0.07822  |
| 174 | C10 | DXZ | 0.00000  | 0.00000  | 0.00000  | 0.00000  | 0.00000  |
| 175 | C10 | DYZ | 0.00000  | 0.00000  | 0.00000  | 0.00000  | 0.00000  |
| 176 | H16 | S   | 0.06164  | -0.42027 | 0.60406  | -0.06233 | 0.02846  |
| 177 | H16 | S   | 0.04650  | -0.21493 | 0.31589  | -0.01303 | -0.10496 |
| 178 | H16 | PX  | -0.05301 | 0.42632  | -0.65728 | 0.07727  | -0.04912 |
| 179 | H16 | PY  | 0.03735  | -0.32898 | 0.24241  | -0.00777 | 0.00458  |
| 180 | H16 | PZ  | 0.00000  | 0.00000  | 0.00000  | 0.00000  | 0.00000  |
| 181 | H18 | S   | -0.03844 | 0.17016  | -0.67512 | 0.08783  | -0.00067 |
| 182 | H18 | S   | -0.05157 | 0.03839  | -0.38174 | 0.03975  | 0.04448  |
| 183 | H18 | PX  | -0.04677 | 0.25429  | -0.74796 | 0.09871  | -0.00529 |
| 184 | H18 | PY  | -0.00718 | -0.02941 | -0.23735 | 0.03213  | -0.02596 |
| 185 | H18 | PZ  | 0.00000  | 0.00000  | 0.00000  | 0.00000  | 0.00000  |

|              |           |           |           |           |           |
|--------------|-----------|-----------|-----------|-----------|-----------|
| MO:          | 176       | 177       | 178       | 179       | 180       |
| Eigenvalues: | 4.53682   | 4.57047   | 4.59613   | 4.69338   | 4.75434   |
| (ev):        | 123.45324 | 124.36886 | 125.06718 | 127.71346 | 129.37231 |

|    |    | A   | A        | A        | A        | A        |          |
|----|----|-----|----------|----------|----------|----------|----------|
| 1  | H1 | S   | -0.09646 | 0.10324  | 0.25826  | 0.14374  | -0.03927 |
| 2  | H1 | S   | 0.10343  | -0.09816 | -0.03282 | -0.07107 | 0.16213  |
| 3  | H1 | PX  | 0.07219  | -0.08441 | -0.21510 | -0.14349 | 0.08311  |
| 4  | H1 | PY  | 0.01085  | -0.00538 | -0.04588 | -0.00727 | -0.00951 |
| 5  | H1 | PZ  | 0.00000  | 0.00000  | 0.00000  | 0.00000  | 0.00000  |
| 6  | C1 | S   | 0.14675  | -0.12126 | -0.24252 | -0.16089 | 0.02456  |
| 7  | C1 | S   | -1.06979 | 0.82845  | 1.53514  | 0.98790  | -0.23429 |
| 8  | C1 | PX  | 0.11204  | -0.06672 | -0.07989 | -0.04067 | 0.01375  |
| 9  | C1 | PY  | -0.05517 | 0.10726  | -0.08857 | -0.03914 | 0.18083  |
| 10 | C1 | PZ  | 0.00000  | 0.00000  | 0.00000  | 0.00000  | 0.00000  |
| 11 | C1 | S   | -0.19065 | 0.16009  | 0.49313  | 0.65862  | -0.16162 |
| 12 | C1 | PX  | -0.05704 | 0.11019  | -0.20112 | -0.09429 | -0.33667 |
| 13 | C1 | PY  | 0.05911  | -0.12435 | 0.22780  | -0.14008 | 0.22278  |
| 14 | C1 | PZ  | 0.00000  | 0.00000  | 0.00000  | 0.00000  | 0.00000  |
| 15 | C1 | DXX | 0.61192  | -0.54553 | -1.15482 | -0.76776 | 0.26172  |
| 16 | C1 | DYY | 0.56877  | -0.42185 | -0.84782 | -0.62844 | 0.15974  |
| 17 | C1 | DZZ | 0.56557  | -0.47306 | -0.91418 | -0.59755 | 0.05830  |
| 18 | C1 | DXY | 0.01522  | -0.09719 | 0.10904  | 0.05077  | -0.11352 |
| 19 | C1 | DXZ | 0.00000  | 0.00000  | 0.00000  | 0.00000  | 0.00000  |
| 20 | C1 | DYZ | 0.00000  | 0.00000  | 0.00000  | 0.00000  | 0.00000  |
| 21 | C2 | S   | 0.17721  | 0.11847  | 0.19925  | -0.02320 | 0.16455  |
| 22 | C2 | S   | -1.20482 | -0.68126 | -1.28310 | 0.04546  | -0.91281 |
| 23 | C2 | PX  | -0.12227 | -0.02044 | -0.06950 | -0.00392 | -0.07676 |
| 24 | C2 | PY  | -0.06186 | 0.11980  | -0.06470 | -0.12801 | 0.00367  |
| 25 | C2 | PZ  | 0.00000  | 0.00000  | 0.00000  | 0.00000  | 0.00000  |
| 26 | C2 | S   | -0.44595 | -0.50451 | -0.37224 | 0.54517  | -0.66376 |
| 27 | C2 | PX  | 0.06732  | -0.01814 | -0.22684 | 0.13763  | -0.02069 |
| 28 | C2 | PY  | 0.17629  | 0.04831  | -0.21131 | -0.10321 | 0.38648  |
| 29 | C2 | PZ  | 0.00000  | 0.00000  | 0.00000  | 0.00000  | 0.00000  |
| 30 | C2 | DXX | 0.74395  | 0.54868  | 0.90563  | -0.09054 | 0.80462  |

|    |    |     |          |          |          |          |          |
|----|----|-----|----------|----------|----------|----------|----------|
| 31 | C2 | DYY | 0.60840  | 0.40777  | 0.70097  | -0.08283 | 0.51304  |
| 32 | C2 | DZZ | 0.67781  | 0.44168  | 0.77076  | -0.06617 | 0.59088  |
| 33 | C2 | DXY | 0.00134  | 0.12411  | -0.00444 | -0.10993 | 0.07461  |
| 34 | C2 | DXZ | 0.00000  | 0.00000  | 0.00000  | 0.00000  | 0.00000  |
| 35 | C2 | DYZ | 0.00000  | 0.00000  | 0.00000  | 0.00000  | 0.00000  |
| 36 | C3 | S   | 0.03012  | -0.00086 | -0.20616 | 0.01662  | 0.12411  |
| 37 | C3 | S   | -0.25626 | 0.01436  | 1.33267  | -0.12099 | -0.78958 |
| 38 | C3 | PX  | 0.04068  | 0.11113  | 0.03568  | -0.03189 | -0.01608 |
| 39 | C3 | PY  | -0.15051 | -0.06493 | 0.06708  | 0.18067  | 0.01403  |
| 40 | C3 | PZ  | 0.00000  | 0.00000  | 0.00000  | 0.00000  | 0.00000  |
| 41 | C3 | S   | 0.28159  | 0.31725  | 0.02027  | -0.66372 | 0.31757  |
| 42 | C3 | PX  | -0.33093 | -0.61602 | 0.44105  | 0.03015  | 0.67873  |
| 43 | C3 | PY  | 0.22401  | 0.13430  | 0.24372  | -0.08322 | -0.08444 |
| 44 | C3 | PZ  | 0.00000  | 0.00000  | 0.00000  | 0.00000  | 0.00000  |
| 45 | C3 | DXX | 0.07940  | -0.08300 | -0.85898 | 0.14214  | 0.46020  |
| 46 | C3 | DYY | 0.20890  | 0.19249  | -0.81878 | -0.05530 | 0.49797  |
| 47 | C3 | DZZ | 0.10116  | -0.01716 | -0.80062 | 0.07089  | 0.46913  |
| 48 | C3 | DXY | -0.06975 | 0.00951  | 0.03365  | 0.03860  | -0.02131 |
| 49 | C3 | DXZ | 0.00000  | 0.00000  | 0.00000  | 0.00000  | 0.00000  |
| 50 | C3 | DYZ | 0.00000  | 0.00000  | 0.00000  | 0.00000  | 0.00000  |
| 51 | C4 | S   | 0.23452  | -0.20900 | -0.02781 | 0.00259  | -0.20533 |
| 52 | C4 | S   | -1.53175 | 1.30500  | 0.25072  | 0.03482  | 1.25910  |
| 53 | C4 | PX  | 0.07090  | -0.01294 | 0.14961  | 0.09268  | -0.00406 |
| 54 | C4 | PY  | 0.10789  | -0.03563 | -0.09012 | -0.07213 | 0.03570  |
| 55 | C4 | PZ  | 0.00000  | 0.00000  | 0.00000  | 0.00000  | 0.00000  |
| 56 | C4 | S   | -0.61983 | 0.60094  | -0.01096 | 0.14973  | 0.16723  |
| 57 | C4 | PX  | 0.03543  | -0.00615 | -0.17221 | -0.05696 | -0.03600 |
| 58 | C4 | PY  | 0.11244  | -0.11586 | 0.11001  | 0.00466  | 0.01713  |
| 59 | C4 | PZ  | 0.00000  | 0.00000  | 0.00000  | 0.00000  | 0.00000  |
| 60 | C4 | DXX | 0.80192  | -0.79007 | -0.22560 | -0.06386 | -0.90411 |
| 61 | C4 | DYY | 1.02454  | -0.87390 | 0.05489  | 0.11896  | -0.98016 |
| 62 | C4 | DZZ | 0.89552  | -0.80324 | -0.12758 | 0.00079  | -0.76481 |
| 63 | C4 | DXY | 0.07825  | -0.00922 | -0.00966 | -0.02583 | -0.00378 |
| 64 | C4 | DXZ | 0.00000  | 0.00000  | 0.00000  | 0.00000  | 0.00000  |
| 65 | C4 | DYZ | 0.00000  | 0.00000  | 0.00000  | 0.00000  | 0.00000  |
| 66 | C5 | S   | 0.24109  | -0.11128 | 0.18517  | 0.15616  | 0.01224  |
| 67 | C5 | S   | -1.66554 | 0.61856  | -1.11946 | -0.86677 | -0.37327 |
| 68 | C5 | PX  | -0.06445 | 0.11895  | 0.07138  | -0.01325 | 0.07757  |
| 69 | C5 | PY  | 0.11620  | 0.05202  | 0.05154  | -0.02974 | 0.12352  |
| 70 | C5 | PZ  | 0.00000  | 0.00000  | 0.00000  | 0.00000  | 0.00000  |
| 71 | C5 | S   | -0.41257 | 0.32642  | -0.43963 | -0.74807 | 0.10037  |
| 72 | C5 | PX  | 0.09537  | 0.01506  | -0.22168 | -0.17742 | 0.32364  |
| 73 | C5 | PY  | -0.07233 | -0.12947 | 0.05867  | 0.29240  | -0.43067 |
| 74 | C5 | PZ  | 0.00000  | 0.00000  | 0.00000  | 0.00000  | 0.00000  |
| 75 | C5 | DXX | 0.89924  | -0.32994 | 0.75947  | 0.62104  | 0.28193  |
| 76 | C5 | DYY | 1.06339  | -0.57035 | 0.65706  | 0.67945  | 0.06465  |
| 77 | C5 | DZZ | 0.92432  | -0.41176 | 0.72195  | 0.58116  | 0.04852  |
| 78 | C5 | DXY | -0.08777 | 0.02982  | 0.01050  | 0.01247  | -0.01484 |
| 79 | C5 | DXZ | 0.00000  | 0.00000  | 0.00000  | 0.00000  | 0.00000  |
| 80 | C5 | DYZ | 0.00000  | 0.00000  | 0.00000  | 0.00000  | 0.00000  |
| 81 | C6 | S   | 0.11157  | 0.21541  | 0.02355  | -0.13067 | 0.05387  |
| 82 | C6 | S   | -0.68331 | -1.15261 | -0.25327 | 0.73657  | -0.35716 |
| 83 | C6 | PX  | 0.02439  | 0.00886  | 0.08082  | -0.01432 | 0.04908  |
| 84 | C6 | PY  | -0.06831 | -0.07241 | -0.06460 | 0.03899  | 0.05050  |

|     |    |     |          |          |          |          |          |
|-----|----|-----|----------|----------|----------|----------|----------|
| 85  | C6 | PZ  | 0.00000  | 0.00000  | 0.00000  | 0.00000  | 0.00000  |
| 86  | C6 | S   | 0.24850  | -0.94401 | -0.28638 | -0.09879 | 3.43723  |
| 87  | C6 | PX  | -0.51715 | -0.78531 | 0.60220  | 0.47812  | -0.45773 |
| 88  | C6 | PY  | -0.33285 | -0.15847 | 0.33571  | 0.14062  | -2.00711 |
| 89  | C6 | PZ  | 0.00000  | 0.00000  | 0.00000  | 0.00000  | 0.00000  |
| 90  | C6 | DXX | 0.36610  | 0.77994  | 0.25647  | -0.48859 | 0.13149  |
| 91  | C6 | DYY | 0.44826  | 0.86930  | 0.05532  | -0.57892 | 0.17671  |
| 92  | C6 | DZZ | 0.40256  | 0.80167  | 0.11450  | -0.47437 | 0.17117  |
| 93  | C6 | DXY | 0.05472  | 0.08959  | 0.04421  | -0.01659 | -0.06792 |
| 94  | C6 | DXZ | 0.00000  | 0.00000  | 0.00000  | 0.00000  | 0.00000  |
| 95  | C6 | DYZ | 0.00000  | 0.00000  | 0.00000  | 0.00000  | 0.00000  |
| 96  | C7 | S   | -0.09248 | -0.14115 | -0.02591 | 0.23406  | 0.12455  |
| 97  | C7 | S   | 0.60747  | 0.91248  | 0.12828  | -1.49879 | -0.60281 |
| 98  | C7 | PX  | -0.03551 | -0.07649 | -0.00719 | 0.05606  | 0.08950  |
| 99  | C7 | PY  | -0.06194 | -0.07699 | 0.13806  | -0.02003 | 0.00705  |
| 100 | C7 | PZ  | 0.00000  | 0.00000  | 0.00000  | 0.00000  | 0.00000  |
| 101 | C7 | S   | 0.00615  | 0.02154  | 0.62715  | -0.43901 | -1.07655 |
| 102 | C7 | PX  | 0.30350  | 0.10049  | -0.54417 | -0.13811 | 0.87506  |
| 103 | C7 | PY  | 0.19750  | 0.50579  | -0.12662 | 0.17331  | -0.93742 |
| 104 | C7 | PZ  | 0.00000  | 0.00000  | 0.00000  | 0.00000  | 0.00000  |
| 105 | C7 | DXX | -0.39286 | -0.58446 | -0.10847 | 1.16403  | 0.40173  |
| 106 | C7 | DYY | -0.43187 | -0.62263 | 0.01122  | 0.96977  | 0.40238  |
| 107 | C7 | DZZ | -0.34714 | -0.51654 | -0.09428 | 0.87581  | 0.44407  |
| 108 | C7 | DXY | 0.09379  | 0.17392  | -0.07896 | -0.12125 | -0.10114 |
| 109 | C7 | DXZ | 0.00000  | 0.00000  | 0.00000  | 0.00000  | 0.00000  |
| 110 | C7 | DYZ | 0.00000  | 0.00000  | 0.00000  | 0.00000  | 0.00000  |
| 111 | H3 | S   | -0.20534 | 0.14297  | -0.04290 | -0.03834 | 0.19215  |
| 112 | H3 | S   | 0.09488  | -0.07922 | -0.03785 | -0.01238 | -0.05794 |
| 113 | H3 | PX  | 0.07913  | -0.06295 | 0.02816  | 0.01894  | -0.08738 |
| 114 | H3 | PY  | 0.14211  | -0.09327 | 0.05175  | 0.03363  | -0.15771 |
| 115 | H3 | PZ  | 0.00000  | 0.00000  | 0.00000  | 0.00000  | 0.00000  |
| 116 | H4 | S   | -0.19754 | 0.12483  | -0.09171 | -0.12562 | 0.03320  |
| 117 | H4 | S   | 0.17226  | -0.00821 | 0.03543  | -0.02645 | 0.23660  |
| 118 | H4 | PX  | -0.09275 | 0.05806  | -0.03282 | -0.06048 | -0.00244 |
| 119 | H4 | PY  | 0.13879  | -0.09532 | 0.04218  | 0.08182  | 0.00973  |
| 120 | H4 | PZ  | 0.00000  | 0.00000  | 0.00000  | 0.00000  | 0.00000  |
| 121 | N1 | S   | 0.09750  | -0.03737 | -0.10463 | -0.05350 | 0.42714  |
| 122 | N1 | S   | -0.10825 | -0.01838 | 0.09944  | -0.00382 | 0.03316  |
| 123 | N1 | PX  | 0.04087  | -0.00435 | -0.06340 | 0.01412  | 0.09877  |
| 124 | N1 | PY  | -0.06291 | -0.14105 | -0.01494 | 0.05080  | 0.07676  |
| 125 | N1 | PZ  | 0.00000  | 0.00000  | 0.00000  | 0.00000  | 0.00000  |
| 126 | N1 | S   | -1.34729 | 0.46832  | 1.42741  | 0.98601  | -7.45202 |
| 127 | N1 | PX  | -0.22781 | 0.32543  | 0.18176  | 0.22912  | -1.90282 |
| 128 | N1 | PY  | -0.38098 | -0.46593 | 0.34556  | 0.31769  | -0.76575 |
| 129 | N1 | PZ  | 0.00000  | 0.00000  | 0.00000  | 0.00000  | 0.00000  |
| 130 | N1 | DXX | 0.33214  | 0.01877  | -0.38181 | -0.09565 | 1.01913  |
| 131 | N1 | DYY | 0.23381  | -0.21646 | -0.31315 | -0.08047 | 1.10704  |
| 132 | N1 | DZZ | 0.31604  | -0.12033 | -0.32783 | -0.18792 | 1.37750  |
| 133 | N1 | DXY | -0.10283 | -0.16550 | 0.05146  | 0.07077  | 0.04110  |
| 134 | N1 | DXZ | 0.00000  | 0.00000  | 0.00000  | 0.00000  | 0.00000  |
| 135 | N1 | DYZ | 0.00000  | 0.00000  | 0.00000  | 0.00000  | 0.00000  |
| 136 | H6 | S   | -0.12205 | -0.11276 | -0.20411 | 0.01306  | -0.15321 |
| 137 | H6 | S   | 0.14034  | 0.06845  | -0.00081 | 0.00630  | 0.09052  |

|     |     |     |          |          |          |          |          |
|-----|-----|-----|----------|----------|----------|----------|----------|
| 138 | H6  | PX  | -0.09824 | -0.10749 | -0.15430 | 0.02680  | -0.17614 |
| 139 | H6  | PY  | 0.01388  | 0.01322  | 0.01075  | -0.00111 | -0.00377 |
| 140 | H6  | PZ  | 0.00000  | 0.00000  | 0.00000  | 0.00000  | 0.00000  |
| 141 | C8  | S   | -0.11737 | -0.23710 | 0.11829  | -0.02599 | 0.16283  |
| 142 | C8  | S   | 0.70204  | 1.46049  | -0.72003 | 0.31437  | -1.02233 |
| 143 | C8  | PX  | 0.03685  | 0.01645  | -0.01890 | -0.07688 | 0.01627  |
| 144 | C8  | PY  | -0.04748 | -0.05757 | 0.11132  | -0.19928 | -0.07200 |
| 145 | C8  | PZ  | 0.00000  | 0.00000  | 0.00000  | 0.00000  | 0.00000  |
| 146 | C8  | S   | 0.73946  | 0.54671  | -0.84897 | -0.31634 | 1.32489  |
| 147 | C8  | PX  | 0.17772  | 0.78505  | -0.22347 | 0.08524  | -1.41885 |
| 148 | C8  | PY  | 0.39701  | -0.11390 | -0.50348 | -0.39783 | 2.05031  |
| 149 | C8  | PZ  | 0.00000  | 0.00000  | 0.00000  | 0.00000  | 0.00000  |
| 150 | C8  | DXX | -0.46638 | -0.90228 | 0.49914  | -0.15656 | 0.57231  |
| 151 | C8  | DYY | -0.41684 | -0.91846 | 0.41230  | -0.06981 | 0.81696  |
| 152 | C8  | DZZ | -0.45562 | -0.89968 | 0.45993  | -0.12166 | 0.56807  |
| 153 | C8  | DXY | 0.08023  | 0.08635  | -0.05392 | -0.10460 | 0.01099  |
| 154 | C8  | DXZ | 0.00000  | 0.00000  | 0.00000  | 0.00000  | 0.00000  |
| 155 | C8  | DYZ | 0.00000  | 0.00000  | 0.00000  | 0.00000  | 0.00000  |
| 156 | H8  | S   | 0.07619  | 0.18680  | 0.02914  | -0.23466 | -0.20060 |
| 157 | H8  | S   | -0.11536 | 0.01148  | 0.12320  | 0.19759  | -0.35687 |
| 158 | H8  | PX  | -0.09251 | -0.16221 | 0.01522  | 0.22777  | 0.10780  |
| 159 | H8  | PY  | -0.01097 | -0.01186 | 0.03447  | -0.09573 | 0.01496  |
| 160 | H8  | PZ  | 0.00000  | 0.00000  | 0.00000  | 0.00000  | 0.00000  |
| 161 | C10 | S   | -0.08014 | -0.14746 | 0.15507  | -0.30794 | -0.00734 |
| 162 | C10 | S   | 0.56024  | 1.07811  | -1.02702 | 1.96607  | -0.07654 |
| 163 | C10 | PX  | -0.00128 | 0.00287  | -0.00174 | 0.01060  | -0.02292 |
| 164 | C10 | PY  | 0.06015  | 0.16225  | -0.07283 | 0.07021  | -0.15474 |
| 165 | C10 | PZ  | 0.00000  | 0.00000  | 0.00000  | 0.00000  | 0.00000  |
| 166 | C10 | S   | 0.29898  | 0.18037  | -0.58047 | 0.73985  | 1.09728  |
| 167 | C10 | PX  | -0.05004 | -0.28503 | 0.04943  | -0.00520 | 0.64915  |
| 168 | C10 | PY  | 0.02405  | -0.10034 | -0.07518 | 0.02021  | 0.33854  |
| 169 | C10 | PZ  | 0.00000  | 0.00000  | 0.00000  | 0.00000  | 0.00000  |
| 170 | C10 | DXX | -0.35381 | -0.71155 | 0.70280  | -1.47805 | 0.07542  |
| 171 | C10 | DYY | -0.32299 | -0.56167 | 0.64545  | -1.33227 | -0.17315 |
| 172 | C10 | DZZ | -0.30351 | -0.54988 | 0.58037  | -1.12627 | -0.02902 |
| 173 | C10 | DXY | 0.02089  | 0.02209  | -0.01630 | -0.03279 | 0.02512  |
| 174 | C10 | DXZ | 0.00000  | 0.00000  | 0.00000  | 0.00000  | 0.00000  |
| 175 | C10 | DYZ | 0.00000  | 0.00000  | 0.00000  | 0.00000  | 0.00000  |
| 176 | H16 | S   | 0.06503  | 0.15520  | -0.11933 | 0.23648  | -0.08920 |
| 177 | H16 | S   | -0.02420 | -0.00668 | 0.06113  | -0.16586 | -0.21073 |
| 178 | H16 | PX  | -0.04901 | -0.09081 | 0.09648  | -0.19269 | -0.00665 |
| 179 | H16 | PY  | 0.02128  | 0.04950  | -0.04986 | 0.12946  | -0.00741 |
| 180 | H16 | PZ  | 0.00000  | 0.00000  | 0.00000  | 0.00000  | 0.00000  |
| 181 | H18 | S   | 0.04497  | 0.09874  | -0.10251 | 0.26991  | 0.00896  |
| 182 | H18 | S   | -0.07461 | -0.21323 | 0.10409  | -0.15885 | 0.20361  |
| 183 | H18 | PX  | 0.03348  | 0.07378  | -0.09074 | 0.24256  | -0.00760 |
| 184 | H18 | PY  | 0.00978  | 0.03840  | -0.03536 | 0.10963  | -0.03015 |
| 185 | H18 | PZ  | 0.00000  | 0.00000  | 0.00000  | 0.00000  | 0.00000  |

|              |           |           |           |           |         |
|--------------|-----------|-----------|-----------|-----------|---------|
| MO:          | 181       | 182       | 183       | 184       | 185     |
| Eigenvalues: | 4.86203   | 4.88576   | 5.04654   | 5.28033   | 0.00000 |
| (ev):        | 132.30270 | 132.94838 | 137.32340 | 143.68525 | 0.00000 |

A

A

A

A

A

|    |    |     |          |          |          |          |         |
|----|----|-----|----------|----------|----------|----------|---------|
| 1  | H1 | S   | -0.00313 | 0.25367  | 0.06797  | -0.21258 | 0.00000 |
| 2  | H1 | S   | 0.04847  | 0.04260  | -0.11924 | 0.04590  | 0.00000 |
| 3  | H1 | PX  | 0.01114  | -0.24467 | -0.09210 | 0.22936  | 0.00000 |
| 4  | H1 | PY  | -0.02417 | -0.01295 | -0.00890 | -0.01060 | 0.00000 |
| 5  | H1 | PZ  | 0.00000  | 0.00000  | 0.00000  | 0.00000  | 0.00000 |
| 6  | C1 | S   | 0.04057  | -0.23752 | -0.04869 | 0.17493  | 0.00000 |
| 7  | C1 | S   | -0.27385 | 1.33181  | 0.37159  | -1.07533 | 0.00000 |
| 8  | C1 | PX  | 0.01476  | 0.04918  | 0.00108  | -0.06938 | 0.00000 |
| 9  | C1 | PY  | -0.15118 | -0.02790 | -0.09380 | -0.03666 | 0.00000 |
| 10 | C1 | PZ  | 0.00000  | 0.00000  | 0.00000  | 0.00000  | 0.00000 |
| 11 | C1 | S   | -0.37526 | 1.41893  | -0.28652 | -0.91727 | 0.00000 |
| 12 | C1 | PX  | 0.00558  | -0.54508 | 0.32339  | 0.26349  | 0.00000 |
| 13 | C1 | PY  | 0.29788  | 0.07785  | 0.01723  | -0.13797 | 0.00000 |
| 14 | C1 | PZ  | 0.00000  | 0.00000  | 0.00000  | 0.00000  | 0.00000 |
| 15 | C1 | DXX | 0.15572  | -1.18125 | -0.34653 | 1.01811  | 0.00000 |
| 16 | C1 | DYY | 0.21248  | -1.05767 | -0.26480 | 1.00925  | 0.00000 |
| 17 | C1 | DZZ | 0.15770  | -0.85104 | -0.16517 | 0.57101  | 0.00000 |
| 18 | C1 | DXY | 0.14458  | -0.00038 | 0.09100  | 0.07709  | 0.00000 |
| 19 | C1 | DXZ | 0.00000  | 0.00000  | 0.00000  | 0.00000  | 0.00000 |
| 20 | C1 | DYZ | 0.00000  | 0.00000  | 0.00000  | 0.00000  | 0.00000 |
| 21 | C2 | S   | 0.06772  | -0.23027 | 0.14392  | -0.13268 | 0.00000 |
| 22 | C2 | S   | -0.35772 | 1.38673  | -0.93128 | 0.82945  | 0.00000 |
| 23 | C2 | PX  | -0.00872 | -0.05196 | 0.01059  | -0.05380 | 0.00000 |
| 24 | C2 | PY  | 0.16324  | 0.02600  | 0.08611  | -0.01730 | 0.00000 |
| 25 | C2 | PZ  | 0.00000  | 0.00000  | 0.00000  | 0.00000  | 0.00000 |
| 26 | C2 | S   | -0.16015 | 1.53411  | -0.44593 | 0.71019  | 0.00000 |
| 27 | C2 | PX  | 0.05007  | 0.70403  | 0.16539  | 0.36744  | 0.00000 |
| 28 | C2 | PY  | -0.01483 | 0.32703  | 0.05195  | 0.41553  | 0.00000 |
| 29 | C2 | PZ  | 0.00000  | 0.00000  | 0.00000  | 0.00000  | 0.00000 |
| 30 | C2 | DXX | 0.40911  | -1.12560 | 0.87688  | -0.75043 | 0.00000 |
| 31 | C2 | DYY | 0.26025  | -1.12767 | 0.72188  | -0.78444 | 0.00000 |
| 32 | C2 | DZZ | 0.22318  | -0.83381 | 0.48424  | -0.43466 | 0.00000 |
| 33 | C2 | DXY | 0.15873  | 0.05973  | 0.05644  | 0.00520  | 0.00000 |
| 34 | C2 | DXZ | 0.00000  | 0.00000  | 0.00000  | 0.00000  | 0.00000 |
| 35 | C2 | DYZ | 0.00000  | 0.00000  | 0.00000  | 0.00000  | 0.00000 |
| 36 | C3 | S   | -0.20263 | 0.09926  | -0.03300 | -0.24852 | 0.00000 |
| 37 | C3 | S   | 1.19534  | -0.69620 | 0.06703  | 1.34366  | 0.00000 |
| 38 | C3 | PX  | 0.03086  | 0.10038  | -0.02462 | -0.00731 | 0.00000 |
| 39 | C3 | PY  | 0.04209  | 0.03028  | 0.11750  | 0.11288  | 0.00000 |
| 40 | C3 | PZ  | 0.00000  | 0.00000  | 0.00000  | 0.00000  | 0.00000 |
| 41 | C3 | S   | 1.41304  | 0.50046  | 0.89614  | 3.53678  | 0.00000 |
| 42 | C3 | PX  | 0.02412  | -0.17882 | -0.36204 | -0.86575 | 0.00000 |
| 43 | C3 | PY  | 0.39903  | -0.22782 | 0.50537  | -0.98022 | 0.00000 |
| 44 | C3 | PZ  | 0.00000  | 0.00000  | 0.00000  | 0.00000  | 0.00000 |
| 45 | C3 | DXX | -0.90452 | 0.29572  | -0.03939 | -1.04713 | 0.00000 |
| 46 | C3 | DYY | -0.97493 | 0.67450  | -0.26120 | -1.43542 | 0.00000 |
| 47 | C3 | DZZ | -0.74281 | 0.36468  | -0.10141 | -0.83969 | 0.00000 |
| 48 | C3 | DXY | -0.05959 | 0.02773  | -0.01143 | -0.11698 | 0.00000 |
| 49 | C3 | DXZ | 0.00000  | 0.00000  | 0.00000  | 0.00000  | 0.00000 |
| 50 | C3 | DYZ | 0.00000  | 0.00000  | 0.00000  | 0.00000  | 0.00000 |
| 51 | C4 | S   | 0.15826  | 0.13547  | 0.12173  | -0.13827 | 0.00000 |
| 52 | C4 | S   | -0.98363 | -0.77670 | -0.82036 | 0.86294  | 0.00000 |
| 53 | C4 | PX  | -0.02621 | 0.12689  | 0.01880  | -0.05605 | 0.00000 |
| 54 | C4 | PY  | 0.02358  | -0.05919 | -0.01897 | 0.05410  | 0.00000 |

|     |    |     |          |          |          |          |         |
|-----|----|-----|----------|----------|----------|----------|---------|
| 55  | C4 | PZ  | 0.00000  | 0.00000  | 0.00000  | 0.00000  | 0.00000 |
| 56  | C4 | S   | -1.00805 | -1.16812 | -0.34896 | 1.04117  | 0.00000 |
| 57  | C4 | PX  | 0.12690  | 0.06877  | 0.08030  | -0.05654 | 0.00000 |
| 58  | C4 | PY  | 0.20703  | 0.35696  | -0.08654 | -0.31856 | 0.00000 |
| 59  | C4 | PZ  | 0.00000  | 0.00000  | 0.00000  | 0.00000  | 0.00000 |
| 60  | C4 | DXX | 0.77445  | 0.56486  | 0.66701  | -0.77045 | 0.00000 |
| 61  | C4 | DYY | 0.74126  | 0.78377  | 0.68658  | -0.81867 | 0.00000 |
| 62  | C4 | DZZ | 0.56990  | 0.46371  | 0.42153  | -0.44981 | 0.00000 |
| 63  | C4 | DXY | 0.03222  | -0.03327 | 0.01845  | 0.00580  | 0.00000 |
| 64  | C4 | DXZ | 0.00000  | 0.00000  | 0.00000  | 0.00000  | 0.00000 |
| 65  | C4 | DYZ | 0.00000  | 0.00000  | 0.00000  | 0.00000  | 0.00000 |
| 66  | C5 | S   | -0.22184 | 0.03586  | -0.16331 | 0.12009  | 0.00000 |
| 67  | C5 | S   | 1.30153  | -0.28080 | 1.01789  | -0.77289 | 0.00000 |
| 68  | C5 | PX  | 0.01932  | -0.12750 | 0.05468  | -0.04095 | 0.00000 |
| 69  | C5 | PY  | 0.03215  | -0.05939 | 0.05374  | -0.04185 | 0.00000 |
| 70  | C5 | PZ  | 0.00000  | 0.00000  | 0.00000  | 0.00000  | 0.00000 |
| 71  | C5 | S   | 1.10151  | -0.50032 | 0.66645  | -1.14590 | 0.00000 |
| 72  | C5 | PX  | 0.27718  | 0.31229  | 0.09328  | 0.02565  | 0.00000 |
| 73  | C5 | PY  | -0.33332 | 0.09208  | -0.08073 | 0.27012  | 0.00000 |
| 74  | C5 | PZ  | 0.00000  | 0.00000  | 0.00000  | 0.00000  | 0.00000 |
| 75  | C5 | DXX | -1.00610 | 0.15372  | -0.82428 | 0.69928  | 0.00000 |
| 76  | C5 | DYY | -1.07997 | 0.37082  | -0.92607 | 0.71734  | 0.00000 |
| 77  | C5 | DZZ | -0.79822 | 0.10266  | -0.56097 | 0.38810  | 0.00000 |
| 78  | C5 | DXY | 0.02374  | 0.03582  | 0.01653  | 0.00411  | 0.00000 |
| 79  | C5 | DXZ | 0.00000  | 0.00000  | 0.00000  | 0.00000  | 0.00000 |
| 80  | C5 | DYZ | 0.00000  | 0.00000  | 0.00000  | 0.00000  | 0.00000 |
| 81  | C6 | S   | 0.17013  | 0.26217  | -0.03969 | 0.17596  | 0.00000 |
| 82  | C6 | S   | -1.03366 | -1.48003 | 0.40761  | -0.96418 | 0.00000 |
| 83  | C6 | PX  | 0.05146  | -0.04931 | 0.07236  | 0.02296  | 0.00000 |
| 84  | C6 | PY  | -0.05442 | 0.01955  | 0.04275  | -0.04008 | 0.00000 |
| 85  | C6 | PZ  | 0.00000  | 0.00000  | 0.00000  | 0.00000  | 0.00000 |
| 86  | C6 | S   | -0.07785 | 0.24556  | 0.38298  | -1.73173 | 0.00000 |
| 87  | C6 | PX  | -0.28095 | -0.82911 | -0.60168 | -1.23639 | 0.00000 |
| 88  | C6 | PY  | -0.96370 | -1.61530 | -0.82374 | 0.14888  | 0.00000 |
| 89  | C6 | PZ  | 0.00000  | 0.00000  | 0.00000  | 0.00000  | 0.00000 |
| 90  | C6 | DXX | 0.83159  | 0.99258  | -0.24438 | 0.83462  | 0.00000 |
| 91  | C6 | DYY | 0.75634  | 1.31575  | -0.40814 | 0.90714  | 0.00000 |
| 92  | C6 | DZZ | 0.61082  | 0.91663  | -0.14713 | 0.59339  | 0.00000 |
| 93  | C6 | DXY | -0.00568 | -0.08317 | -0.02080 | -0.06601 | 0.00000 |
| 94  | C6 | DXZ | 0.00000  | 0.00000  | 0.00000  | 0.00000  | 0.00000 |
| 95  | C6 | DYZ | 0.00000  | 0.00000  | 0.00000  | 0.00000  | 0.00000 |
| 96  | C7 | S   | 0.05846  | 0.04544  | 0.22163  | 0.19461  | 0.00000 |
| 97  | C7 | S   | -0.24707 | -0.17701 | -1.37586 | -0.89381 | 0.00000 |
| 98  | C7 | PX  | 0.03850  | 0.03332  | -0.00837 | -0.03366 | 0.00000 |
| 99  | C7 | PY  | 0.16866  | -0.07107 | -0.01960 | 0.13767  | 0.00000 |
| 100 | C7 | PZ  | 0.00000  | 0.00000  | 0.00000  | 0.00000  | 0.00000 |
| 101 | C7 | S   | -0.15862 | -1.00633 | -1.01258 | -3.04260 | 0.00000 |
| 102 | C7 | PX  | 0.13555  | 0.79838  | 0.42604  | 1.30880  | 0.00000 |
| 103 | C7 | PY  | -0.26203 | -0.38683 | 0.10776  | -0.38530 | 0.00000 |
| 104 | C7 | PZ  | 0.00000  | 0.00000  | 0.00000  | 0.00000  | 0.00000 |
| 105 | C7 | DXX | 0.21180  | 0.10673  | 1.29698  | 1.04895  | 0.00000 |
| 106 | C7 | DYY | 0.31180  | 0.06151  | 0.97812  | 0.90205  | 0.00000 |
| 107 | C7 | DZZ | 0.19487  | 0.17645  | 0.77058  | 0.61991  | 0.00000 |
| 108 | C7 | DXY | -0.21544 | 0.07098  | -0.06610 | -0.23490 | 0.00000 |

|     |     |     |          |          |          |          |         |
|-----|-----|-----|----------|----------|----------|----------|---------|
| 109 | C7  | DXZ | 0.00000  | 0.00000  | 0.00000  | 0.00000  | 0.00000 |
| 110 | C7  | DYZ | 0.00000  | 0.00000  | 0.00000  | 0.00000  | 0.00000 |
| 111 | H3  | S   | -0.13743 | -0.15941 | -0.13881 | 0.17994  | 0.00000 |
| 112 | H3  | S   | 0.03333  | -0.00770 | 0.07809  | 0.00335  | 0.00000 |
| 113 | H3  | PX  | 0.06801  | 0.07946  | 0.06219  | -0.07709 | 0.00000 |
| 114 | H3  | PY  | 0.12818  | 0.15029  | 0.14419  | -0.18022 | 0.00000 |
| 115 | H3  | PZ  | 0.00000  | 0.00000  | 0.00000  | 0.00000  | 0.00000 |
| 116 | H4  | S   | 0.22772  | -0.05769 | 0.19583  | -0.13888 | 0.00000 |
| 117 | H4  | S   | 0.02822  | 0.08872  | -0.03784 | 0.04240  | 0.00000 |
| 118 | H4  | PX  | 0.11558  | -0.05562 | 0.10976  | -0.08166 | 0.00000 |
| 119 | H4  | PY  | -0.18582 | 0.07004  | -0.18590 | 0.14738  | 0.00000 |
| 120 | H4  | PZ  | 0.00000  | 0.00000  | 0.00000  | 0.00000  | 0.00000 |
| 121 | N1  | S   | 0.04920  | 0.19371  | 0.11360  | -0.00700 | 0.00000 |
| 122 | N1  | S   | 0.20026  | 0.09766  | -0.13615 | -0.00499 | 0.00000 |
| 123 | N1  | PX  | -0.09423 | -0.02345 | 0.13465  | -0.04264 | 0.00000 |
| 124 | N1  | PY  | -0.04509 | -0.10365 | 0.05577  | -0.07893 | 0.00000 |
| 125 | N1  | PZ  | 0.00000  | 0.00000  | 0.00000  | 0.00000  | 0.00000 |
| 126 | N1  | S   | -1.64116 | -4.00911 | -1.74496 | -0.01352 | 0.00000 |
| 127 | N1  | PX  | -0.52122 | -0.99044 | -0.14603 | 0.09288  | 0.00000 |
| 128 | N1  | PY  | -0.23040 | -0.76611 | -0.41672 | -0.37291 | 0.00000 |
| 129 | N1  | PZ  | 0.00000  | 0.00000  | 0.00000  | 0.00000  | 0.00000 |
| 130 | N1  | DXX | -0.08313 | 0.40982  | 0.53266  | -0.00762 | 0.00000 |
| 131 | N1  | DYY | -0.09393 | 0.31997  | 0.47186  | -0.13917 | 0.00000 |
| 132 | N1  | DZZ | 0.21708  | 0.65931  | 0.27643  | 0.00453  | 0.00000 |
| 133 | N1  | DXY | 0.05586  | -0.11671 | -0.06808 | -0.10717 | 0.00000 |
| 134 | N1  | DXZ | 0.00000  | 0.00000  | 0.00000  | 0.00000  | 0.00000 |
| 135 | N1  | DYZ | 0.00000  | 0.00000  | 0.00000  | 0.00000  | 0.00000 |
| 136 | H6  | S   | -0.09881 | 0.24340  | -0.18538 | 0.17624  | 0.00000 |
| 137 | H6  | S   | 0.03868  | 0.07839  | 0.14597  | 0.03417  | 0.00000 |
| 138 | H6  | PX  | -0.12112 | 0.20935  | -0.21430 | 0.16453  | 0.00000 |
| 139 | H6  | PY  | -0.00432 | 0.00562  | -0.00388 | -0.00126 | 0.00000 |
| 140 | H6  | PZ  | 0.00000  | 0.00000  | 0.00000  | 0.00000  | 0.00000 |
| 141 | C8  | S   | 0.20104  | -0.00143 | -0.23473 | -0.11992 | 0.00000 |
| 142 | C8  | S   | -1.20376 | -0.07961 | 1.48166  | 0.61555  | 0.00000 |
| 143 | C8  | PX  | -0.05542 | -0.00884 | -0.00156 | -0.02494 | 0.00000 |
| 144 | C8  | PY  | -0.12113 | 0.01588  | 0.08119  | 0.01526  | 0.00000 |
| 145 | C8  | PZ  | 0.00000  | 0.00000  | 0.00000  | 0.00000  | 0.00000 |
| 146 | C8  | S   | -0.53717 | 1.22147  | 1.57225  | 1.34958  | 0.00000 |
| 147 | C8  | PX  | -0.42589 | -0.36816 | 0.19320  | 0.81979  | 0.00000 |
| 148 | C8  | PY  | 0.50031  | 1.33811  | 0.25965  | 0.88479  | 0.00000 |
| 149 | C8  | PZ  | 0.00000  | 0.00000  | 0.00000  | 0.00000  | 0.00000 |
| 150 | C8  | DXX | 0.87956  | -0.02404 | -1.13088 | -0.48419 | 0.00000 |
| 151 | C8  | DYY | 1.05073  | 0.04558  | -1.35618 | -0.66673 | 0.00000 |
| 152 | C8  | DZZ | 0.71376  | -0.00932 | -0.82714 | -0.39590 | 0.00000 |
| 153 | C8  | DXY | -0.05602 | -0.00966 | -0.07904 | -0.09133 | 0.00000 |
| 154 | C8  | DXZ | 0.00000  | 0.00000  | 0.00000  | 0.00000  | 0.00000 |
| 155 | C8  | DYZ | 0.00000  | 0.00000  | 0.00000  | 0.00000  | 0.00000 |
| 156 | H8  | S   | -0.11675 | -0.05438 | -0.30948 | -0.30118 | 0.00000 |
| 157 | H8  | S   | -0.06051 | -0.25349 | 0.01688  | -0.22109 | 0.00000 |
| 158 | H8  | PX  | 0.10451  | -0.01136 | 0.26973  | 0.26994  | 0.00000 |
| 159 | H8  | PY  | -0.00246 | -0.00033 | -0.12496 | -0.09187 | 0.00000 |
| 160 | H8  | PZ  | 0.00000  | 0.00000  | 0.00000  | 0.00000  | 0.00000 |
| 161 | C10 | S   | -0.17714 | 0.06308  | 0.15128  | 0.05280  | 0.00000 |
| 162 | C10 | S   | 1.04887  | -0.40904 | -0.87231 | -0.25962 | 0.00000 |

|     |     |     |          |          |          |          |         |
|-----|-----|-----|----------|----------|----------|----------|---------|
| 163 | C10 | PX  | -0.01469 | -0.01284 | 0.01351  | 0.01602  | 0.00000 |
| 164 | C10 | PY  | -0.11327 | -0.02687 | 0.17490  | 0.12488  | 0.00000 |
| 165 | C10 | PZ  | 0.00000  | 0.00000  | 0.00000  | 0.00000  | 0.00000 |
| 166 | C10 | S   | 1.02964  | 0.41767  | -0.68464 | 0.13520  | 0.00000 |
| 167 | C10 | PX  | 0.23955  | 0.25656  | -0.01149 | -0.25174 | 0.00000 |
| 168 | C10 | PY  | 0.18239  | 0.14806  | -0.09156 | 0.09552  | 0.00000 |
| 169 | C10 | PZ  | 0.00000  | 0.00000  | 0.00000  | 0.00000  | 0.00000 |
| 170 | C10 | DXX | -0.86353 | 0.35620  | 0.77480  | 0.25097  | 0.00000 |
| 171 | C10 | DYY | -0.95991 | 0.25482  | 0.93492  | 0.37078  | 0.00000 |
| 172 | C10 | DZZ | -0.60740 | 0.21925  | 0.47818  | 0.15830  | 0.00000 |
| 173 | C10 | DXY | -0.00864 | -0.00258 | -0.04170 | -0.05519 | 0.00000 |
| 174 | C10 | DXZ | 0.00000  | 0.00000  | 0.00000  | 0.00000  | 0.00000 |
| 175 | C10 | DYZ | 0.00000  | 0.00000  | 0.00000  | 0.00000  | 0.00000 |
| 176 | H16 | S   | 0.12646  | -0.10467 | -0.17749 | -0.05409 | 0.00000 |
| 177 | H16 | S   | -0.18393 | -0.06110 | 0.09690  | 0.10788  | 0.00000 |
| 178 | H16 | PX  | -0.14189 | 0.05672  | 0.16302  | 0.07216  | 0.00000 |
| 179 | H16 | PY  | 0.10084  | -0.04215 | -0.10881 | -0.04117 | 0.00000 |
| 180 | H16 | PZ  | 0.00000  | 0.00000  | 0.00000  | 0.00000  | 0.00000 |
| 181 | H18 | S   | 0.18276  | -0.04689 | -0.13611 | -0.05442 | 0.00000 |
| 182 | H18 | S   | -0.03400 | 0.09450  | 0.09712  | -0.06220 | 0.00000 |
| 183 | H18 | PX  | 0.15962  | -0.06151 | -0.13698 | -0.04004 | 0.00000 |
| 184 | H18 | PY  | 0.07652  | -0.04122 | -0.08140 | -0.01938 | 0.00000 |
| 185 | H18 | PZ  | 0.00000  | 0.00000  | 0.00000  | 0.00000  | 0.00000 |

#### Atomic Charges from Electrostatic Potential

Resolution: 1 points per atomic unit

6696 of 15903 gridpoints used in calculation

| Atom | Charge    |
|------|-----------|
| ---- | -----     |
| H 1  | 0.182682  |
| C 2  | -0.282027 |
| C 3  | -0.427477 |
| C 4  | 0.157576  |
| C 5  | -0.155004 |
| C 6  | -0.019853 |
| C 7  | 0.637866  |
| C 8  | -0.505415 |
| H 9  | 0.137409  |
| H 10 | 0.125546  |
| N 11 | -0.720030 |
| H 12 | 0.197534  |
| C 13 | 0.477692  |
| H 14 | 0.237911  |
| C 15 | -0.429961 |
| H 16 | 0.177680  |
| H 17 | 0.207870  |

Total Charge = 0.000000



RMS fit: 1.283698  
RRMS fit: 0.177393

Dipole moment from formal charges:

x = 2.1987, y = 0.5541, z = 0.0000 = 2.2675 debye

Q-minus(elesta) = -0.7200

Q-plus(elesta) = 0.2379

#### Mulliken Population Analysis

| AO | atom type |      | Occupancy |
|----|-----------|------|-----------|
| -- | ----      | ---- | -----     |
| 1  | H1        | S    | 0.534227  |
| 2  | H1        | S    | 0.293930  |
| 3  | H1        | PX   | 0.010027  |
| 4  | H1        | PY   | 0.001556  |
| 5  | H1        | PZ   | 0.002424  |
| 6  | C1        | S    | 1.996538  |
| 7  | C1        | S    | 0.673068  |
| 8  | C1        | PX   | 0.731242  |
| 9  | C1        | PY   | 0.741701  |
| 10 | C1        | PZ   | 0.520173  |
| 11 | C1        | S    | 0.451915  |
| 12 | C1        | PX   | 0.308437  |
| 13 | C1        | PY   | 0.165618  |
| 14 | C1        | PZ   | 0.451393  |
| 15 | C1        | DXX  | 0.018907  |
| 16 | C1        | DYY  | 0.020693  |
| 17 | C1        | DZZ  | -0.018414 |
| 18 | C1        | DXY  | 0.013999  |
| 19 | C1        | DXZ  | 0.003430  |
| 20 | C1        | DYZ  | 0.008192  |
| 21 | C2        | S    | 1.996536  |
| 22 | C2        | S    | 0.672240  |
| 23 | C2        | PX   | 0.730798  |
| 24 | C2        | PY   | 0.744021  |
| 25 | C2        | PZ   | 0.532194  |
| 26 | C2        | S    | 0.467023  |
| 27 | C2        | PX   | 0.306340  |
| 28 | C2        | PY   | 0.159501  |
| 29 | C2        | PZ   | 0.465732  |
| 30 | C2        | DXX  | 0.018030  |
| 31 | C2        | DYY  | 0.020448  |
| 32 | C2        | DZZ  | -0.017929 |
| 33 | C2        | DXY  | 0.014807  |
| 34 | C2        | DXZ  | 0.003257  |
| 35 | C2        | DYZ  | 0.006821  |
| 36 | C3        | S    | 1.996655  |
| 37 | C3        | S    | 0.671935  |

|    |    |     |           |
|----|----|-----|-----------|
| 38 | C3 | PX  | 0.714603  |
| 39 | C3 | PY  | 0.760397  |
| 40 | C3 | PZ  | 0.544646  |
| 41 | C3 | S   | 0.440812  |
| 42 | C3 | PX  | 0.210980  |
| 43 | C3 | PY  | 0.233561  |
| 44 | C3 | PZ  | 0.466911  |
| 45 | C3 | DXX | 0.019466  |
| 46 | C3 | DYY | 0.030938  |
| 47 | C3 | DZZ | -0.017152 |
| 48 | C3 | DXY | 0.013298  |
| 49 | C3 | DXZ | 0.003656  |
| 50 | C3 | DYZ | 0.010067  |
| 51 | C4 | S   | 1.996540  |
| 52 | C4 | S   | 0.669391  |
| 53 | C4 | PX  | 0.718668  |
| 54 | C4 | PY  | 0.746079  |
| 55 | C4 | PZ  | 0.524657  |
| 56 | C4 | S   | 0.489691  |
| 57 | C4 | PX  | 0.199828  |
| 58 | C4 | PY  | 0.294507  |
| 59 | C4 | PZ  | 0.474817  |
| 60 | C4 | DXX | 0.020150  |
| 61 | C4 | DYY | 0.019471  |
| 62 | C4 | DZZ | -0.018519 |
| 63 | C4 | DXY | 0.014098  |
| 64 | C4 | DXZ | 0.005439  |
| 65 | C4 | DYZ | 0.005240  |
| 66 | C5 | S   | 1.996582  |
| 67 | C5 | S   | 0.674128  |
| 68 | C5 | PX  | 0.722416  |
| 69 | C5 | PY  | 0.754860  |
| 70 | C5 | PZ  | 0.499870  |
| 71 | C5 | S   | 0.499096  |
| 72 | C5 | PX  | 0.212127  |
| 73 | C5 | PY  | 0.293392  |
| 74 | C5 | PZ  | 0.453126  |
| 75 | C5 | DXX | 0.019682  |
| 76 | C5 | DYY | 0.019518  |
| 77 | C5 | DZZ | -0.018988 |
| 78 | C5 | DXY | 0.014776  |
| 79 | C5 | DXZ | 0.005484  |
| 80 | C5 | DYZ | 0.005965  |
| 81 | C6 | S   | 1.996741  |
| 82 | C6 | S   | 0.693344  |
| 83 | C6 | PX  | 0.723360  |
| 84 | C6 | PY  | 0.756907  |
| 85 | C6 | PZ  | 0.480469  |
| 86 | C6 | S   | 0.345409  |
| 87 | C6 | PX  | 0.184739  |
| 88 | C6 | PY  | 0.130464  |
| 89 | C6 | PZ  | 0.365449  |
| 90 | C6 | DXX | 0.021562  |
| 91 | C6 | DYY | 0.034517  |

|     |    |     |           |
|-----|----|-----|-----------|
| 92  | C6 | DZZ | -0.020076 |
| 93  | C6 | DXY | 0.024653  |
| 94  | C6 | DXZ | 0.006464  |
| 95  | C6 | DYZ | 0.015544  |
| 96  | C7 | S   | 1.996678  |
| 97  | C7 | S   | 0.676646  |
| 98  | C7 | PX  | 0.724481  |
| 99  | C7 | PY  | 0.751110  |
| 100 | C7 | PZ  | 0.511160  |
| 101 | C7 | S   | 0.445210  |
| 102 | C7 | PX  | 0.309117  |
| 103 | C7 | PY  | 0.200439  |
| 104 | C7 | PZ  | 0.458662  |
| 105 | C7 | DXX | 0.021581  |
| 106 | C7 | DYY | 0.016439  |
| 107 | C7 | DZZ | -0.017967 |
| 108 | C7 | DXY | 0.016389  |
| 109 | C7 | DXZ | 0.002856  |
| 110 | C7 | DYZ | 0.008651  |
| 111 | H3 | S   | 0.535714  |
| 112 | H3 | S   | 0.297733  |
| 113 | H3 | PX  | 0.003041  |
| 114 | H3 | PY  | 0.008358  |
| 115 | H3 | PZ  | 0.002458  |
| 116 | H4 | S   | 0.536095  |
| 117 | H4 | S   | 0.294211  |
| 118 | H4 | PX  | 0.003646  |
| 119 | H4 | PY  | 0.007816  |
| 120 | H4 | PZ  | 0.002259  |
| 121 | N1 | S   | 1.996235  |
| 122 | N1 | S   | 0.785459  |
| 123 | N1 | PX  | 0.913388  |
| 124 | N1 | PY  | 0.778246  |
| 125 | N1 | PZ  | 0.672021  |
| 126 | N1 | S   | 0.964114  |
| 127 | N1 | PX  | 0.571462  |
| 128 | N1 | PY  | 0.314826  |
| 129 | N1 | PZ  | 0.552948  |
| 130 | N1 | DXX | -0.000187 |
| 131 | N1 | DYY | 0.013831  |
| 132 | N1 | DZZ | -0.011239 |
| 133 | N1 | DXY | 0.017646  |
| 134 | N1 | DXZ | 0.006469  |
| 135 | N1 | DYZ | 0.009289  |
| 136 | H6 | S   | 0.531044  |
| 137 | H6 | S   | 0.282647  |
| 138 | H6 | PX  | 0.010177  |
| 139 | H6 | PY  | 0.001499  |
| 140 | H6 | PZ  | 0.002415  |
| 141 | C8 | S   | 1.996653  |
| 142 | C8 | S   | 0.680637  |
| 143 | C8 | PX  | 0.667464  |
| 144 | C8 | PY  | 0.769201  |
| 145 | C8 | PZ  | 0.537599  |

|     |     |     |           |
|-----|-----|-----|-----------|
| 146 | C8  | S   | 0.375689  |
| 147 | C8  | PX  | 0.126334  |
| 148 | C8  | PY  | 0.093261  |
| 149 | C8  | PZ  | 0.429449  |
| 150 | C8  | DXX | 0.019140  |
| 151 | C8  | DYY | 0.030685  |
| 152 | C8  | DZZ | -0.019127 |
| 153 | C8  | DXY | 0.025934  |
| 154 | C8  | DXZ | 0.009133  |
| 155 | C8  | DYZ | 0.010716  |
| 156 | H8  | S   | 0.530976  |
| 157 | H8  | S   | 0.287277  |
| 158 | H8  | PX  | 0.009214  |
| 159 | H8  | PY  | 0.002740  |
| 160 | H8  | PZ  | 0.002486  |
| 161 | C10 | S   | 1.996645  |
| 162 | C10 | S   | 0.679880  |
| 163 | C10 | PX  | 0.726621  |
| 164 | C10 | PY  | 0.770854  |
| 165 | C10 | PZ  | 0.463199  |
| 166 | C10 | S   | 0.565019  |
| 167 | C10 | PX  | 0.369295  |
| 168 | C10 | PY  | 0.236050  |
| 169 | C10 | PZ  | 0.444426  |
| 170 | C10 | DXX | 0.011825  |
| 171 | C10 | DYY | 0.018859  |
| 172 | C10 | DZZ | -0.020377 |
| 173 | C10 | DXY | 0.013621  |
| 174 | C10 | DXZ | 0.000145  |
| 175 | C10 | DYZ | 0.007897  |
| 176 | H16 | S   | 0.533171  |
| 177 | H16 | S   | 0.306004  |
| 178 | H16 | PX  | 0.007270  |
| 179 | H16 | PY  | 0.004369  |
| 180 | H16 | PZ  | 0.002240  |
| 181 | H18 | S   | 0.529085  |
| 182 | H18 | S   | 0.288122  |
| 183 | H18 | PX  | 0.008764  |
| 184 | H18 | PY  | 0.003094  |
| 185 | H18 | PZ  | 0.002105  |

| Atom  | Occupancy | Charge    |
|-------|-----------|-----------|
| ----- | -----     | -----     |
| H1    | 0.842164  | 0.157836  |
| C1    | 6.086893  | -0.086893 |
| C2    | 6.119819  | -0.119819 |
| C3    | 6.100773  | -0.100773 |
| C4    | 6.160057  | -0.160057 |
| C5    | 6.152032  | -0.152032 |
| C6    | 5.759546  | 0.240454  |
| C7    | 6.121452  | -0.121452 |
| H3    | 0.847304  | 0.152696  |
| H4    | 0.844027  | 0.155973  |

|     |          |           |
|-----|----------|-----------|
| N1  | 7.584508 | -0.584508 |
| H6  | 0.827782 | 0.172218  |
| C8  | 5.752768 | 0.247232  |
| H8  | 0.832693 | 0.167307  |
| C10 | 6.283960 | -0.283960 |
| H16 | 0.853054 | 0.146946  |
| H18 | 0.831169 | 0.168831  |

Total Charge = 0.000000

#### Natural Atomic Orbital Populations

| Nao  | Atom  | Type    | Basis | Occupancy |
|------|-------|---------|-------|-----------|
| ---- | ----- | -----   | ----- | -----     |
| 1    | H1    | S       | MIN   | 0.762232  |
| 2    | H1    | S       | RYD   | 0.000660  |
| 3    | H1    | PX      | RYD   | 0.000584  |
| 4    | H1    | PY      | RYD   | 0.000022  |
| 5    | H1    | PZ      | RYD   | 0.000084  |
| 6    | C1    | S       | MIN   | 1.999001  |
| 7    | C1    | S       | MIN   | 0.946432  |
| 8    | C1    | S       | RYD   | 0.000872  |
| 9    | C1    | S       | RYD   | 0.000017  |
| 10   | C1    | PX      | MIN   | 1.202635  |
| 11   | C1    | PX      | RYD   | 0.005762  |
| 12   | C1    | PY      | MIN   | 1.048784  |
| 13   | C1    | PY      | RYD   | 0.006172  |
| 14   | C1    | PZ      | MIN   | 0.978641  |
| 15   | C1    | PZ      | RYD   | 0.001737  |
| 16   | C1    | DXY     | RYD   | 0.001645  |
| 17   | C1    | DXZ     | RYD   | 0.000736  |
| 18   | C1    | DYZ     | RYD   | 0.000962  |
| 19   | C1    | DXX-YY  | RYD   | 0.001647  |
| 20   | C1    | D3ZZ-RR | RYD   | 0.001200  |
| 21   | C2    | S       | MIN   | 1.998979  |
| 22   | C2    | S       | MIN   | 0.958145  |
| 23   | C2    | S       | RYD   | 0.001101  |
| 24   | C2    | S       | RYD   | 0.000030  |
| 25   | C2    | PX      | MIN   | 1.208579  |
| 26   | C2    | PX      | RYD   | 0.005767  |
| 27   | C2    | PY      | MIN   | 1.052169  |
| 28   | C2    | PY      | RYD   | 0.007106  |
| 29   | C2    | PZ      | MIN   | 1.005452  |
| 30   | C2    | PZ      | RYD   | 0.001993  |
| 31   | C2    | DXY     | RYD   | 0.001815  |
| 32   | C2    | DXZ     | RYD   | 0.000747  |
| 33   | C2    | DYZ     | RYD   | 0.000851  |
| 34   | C2    | DXX-YY  | RYD   | 0.001530  |
| 35   | C2    | D3ZZ-RR | RYD   | 0.001217  |
| 36   | C3    | S       | MIN   | 1.998972  |
| 37   | C3    | S       | MIN   | 0.885307  |
| 38   | C3    | S       | RYD   | 0.001378  |

|    |    |         |     |          |
|----|----|---------|-----|----------|
| 39 | C3 | S       | RYD | 0.000049 |
| 40 | C3 | PX      | MIN | 1.074367 |
| 41 | C3 | PX      | RYD | 0.008200 |
| 42 | C3 | PY      | MIN | 1.115619 |
| 43 | C3 | PY      | RYD | 0.004436 |
| 44 | C3 | PZ      | MIN | 1.037130 |
| 45 | C3 | PZ      | RYD | 0.001083 |
| 46 | C3 | DXY     | RYD | 0.001228 |
| 47 | C3 | DXZ     | RYD | 0.000292 |
| 48 | C3 | DYZ     | RYD | 0.001438 |
| 49 | C3 | DXX-YY  | RYD | 0.001830 |
| 50 | C3 | D3ZZ-RR | RYD | 0.001064 |
| 51 | C4 | S       | MIN | 1.999075 |
| 52 | C4 | S       | MIN | 0.958946 |
| 53 | C4 | S       | RYD | 0.000696 |
| 54 | C4 | S       | RYD | 0.000025 |
| 55 | C4 | PX      | MIN | 1.067538 |
| 56 | C4 | PX      | RYD | 0.005994 |
| 57 | C4 | PY      | MIN | 1.183150 |
| 58 | C4 | PY      | RYD | 0.006385 |
| 59 | C4 | PZ      | MIN | 1.008590 |
| 60 | C4 | PZ      | RYD | 0.001893 |
| 61 | C4 | DXY     | RYD | 0.001657 |
| 62 | C4 | DXZ     | RYD | 0.000548 |
| 63 | C4 | DYZ     | RYD | 0.001053 |
| 64 | C4 | DXX-YY  | RYD | 0.001705 |
| 65 | C4 | D3ZZ-RR | RYD | 0.001256 |
| 66 | C5 | S       | MIN | 1.999086 |
| 67 | C5 | S       | MIN | 0.962389 |
| 68 | C5 | S       | RYD | 0.000636 |
| 69 | C5 | S       | RYD | 0.000028 |
| 70 | C5 | PX      | MIN | 1.077615 |
| 71 | C5 | PX      | RYD | 0.005832 |
| 72 | C5 | PY      | MIN | 1.176961 |
| 73 | C5 | PY      | RYD | 0.006360 |
| 74 | C5 | PZ      | MIN | 0.961742 |
| 75 | C5 | PZ      | RYD | 0.001598 |
| 76 | C5 | DXY     | RYD | 0.001718 |
| 77 | C5 | DXZ     | RYD | 0.000546 |
| 78 | C5 | DYZ     | RYD | 0.001159 |
| 79 | C5 | DXX-YY  | RYD | 0.001678 |
| 80 | C5 | D3ZZ-RR | RYD | 0.001280 |
| 81 | C6 | S       | MIN | 1.999157 |
| 82 | C6 | S       | MIN | 0.838809 |
| 83 | C6 | S       | RYD | 0.003640 |
| 84 | C6 | S       | RYD | 0.000105 |
| 85 | C6 | PX      | MIN | 1.009691 |
| 86 | C6 | PX      | RYD | 0.010802 |
| 87 | C6 | PY      | MIN | 0.972122 |
| 88 | C6 | PY      | RYD | 0.007625 |
| 89 | C6 | PZ      | MIN | 0.864754 |
| 90 | C6 | PZ      | RYD | 0.001134 |
| 91 | C6 | DXY     | RYD | 0.002288 |
| 92 | C6 | DXZ     | RYD | 0.000670 |

|     |    |         |     |          |
|-----|----|---------|-----|----------|
| 93  | C6 | DYZ     | RVD | 0.002295 |
| 94  | C6 | DXX-YY  | RVD | 0.002404 |
| 95  | C6 | D3ZZ-RR | RVD | 0.001021 |
| 96  | C7 | S       | MIN | 1.998878 |
| 97  | C7 | S       | MIN | 0.958603 |
| 98  | C7 | S       | RVD | 0.000707 |
| 99  | C7 | S       | RVD | 0.000040 |
| 100 | C7 | PX      | MIN | 1.176245 |
| 101 | C7 | PX      | RVD | 0.004635 |
| 102 | C7 | PY      | MIN | 1.069483 |
| 103 | C7 | PY      | RVD | 0.005020 |
| 104 | C7 | PZ      | MIN | 0.959855 |
| 105 | C7 | PZ      | RVD | 0.001440 |
| 106 | C7 | DXY     | RVD | 0.001665 |
| 107 | C7 | DXZ     | RVD | 0.000509 |
| 108 | C7 | DYZ     | RVD | 0.001260 |
| 109 | C7 | DXX-YY  | RVD | 0.001580 |
| 110 | C7 | D3ZZ-RR | RVD | 0.001232 |
| 111 | H3 | S       | MIN | 0.763667 |
| 112 | H3 | S       | RVD | 0.000525 |
| 113 | H3 | PX      | RVD | 0.000134 |
| 114 | H3 | PY      | RVD | 0.000474 |
| 115 | H3 | PZ      | RVD | 0.000083 |
| 116 | H4 | S       | MIN | 0.763460 |
| 117 | H4 | S       | RVD | 0.000544 |
| 118 | H4 | PX      | RVD | 0.000181 |
| 119 | H4 | PY      | RVD | 0.000442 |
| 120 | H4 | PZ      | RVD | 0.000072 |
| 121 | N1 | S       | MIN | 1.999380 |
| 122 | N1 | S       | MIN | 1.378795 |
| 123 | N1 | S       | RVD | 0.000485 |
| 124 | N1 | S       | RVD | 0.000015 |
| 125 | N1 | PX      | MIN | 1.623516 |
| 126 | N1 | PX      | RVD | 0.004276 |
| 127 | N1 | PY      | MIN | 1.254374 |
| 128 | N1 | PY      | RVD | 0.003891 |
| 129 | N1 | PZ      | MIN | 1.246202 |
| 130 | N1 | PZ      | RVD | 0.001303 |
| 131 | N1 | DXY     | RVD | 0.003892 |
| 132 | N1 | DXZ     | RVD | 0.002985 |
| 133 | N1 | DYZ     | RVD | 0.001751 |
| 134 | N1 | DXX-YY  | RVD | 0.002990 |
| 135 | N1 | D3ZZ-RR | RVD | 0.002863 |
| 136 | H6 | S       | MIN | 0.751460 |
| 137 | H6 | S       | RVD | 0.000765 |
| 138 | H6 | PX      | RVD | 0.000571 |
| 139 | H6 | PY      | RVD | 0.000022 |
| 140 | H6 | PZ      | RVD | 0.000077 |
| 141 | C8 | S       | MIN | 1.999041 |
| 142 | C8 | S       | MIN | 0.865816 |
| 143 | C8 | S       | RVD | 0.002880 |
| 144 | C8 | S       | RVD | 0.000109 |
| 145 | C8 | PX      | MIN | 0.937354 |

|     |     |         |     |          |
|-----|-----|---------|-----|----------|
| 146 | C8  | PX      | RYD | 0.009642 |
| 147 | C8  | PY      | MIN | 1.062377 |
| 148 | C8  | PY      | RYD | 0.007632 |
| 149 | C8  | PZ      | MIN | 1.009711 |
| 150 | C8  | PZ      | RYD | 0.001605 |
| 151 | C8  | DXY     | RYD | 0.002139 |
| 152 | C8  | DXZ     | RYD | 0.001079 |
| 153 | C8  | DYZ     | RYD | 0.001641 |
| 154 | C8  | DXX-YY  | RYD | 0.002298 |
| 155 | C8  | D3ZZ-RR | RYD | 0.001107 |
| 156 | H8  | S       | MIN | 0.760888 |
| 157 | H8  | S       | RYD | 0.000440 |
| 158 | H8  | PX      | RYD | 0.000538 |
| 159 | H8  | PY      | RYD | 0.000083 |
| 160 | H8  | PZ      | RYD | 0.000088 |
| 161 | C10 | S       | MIN | 1.998994 |
| 162 | C10 | S       | MIN | 1.046941 |
| 163 | C10 | S       | RYD | 0.001135 |
| 164 | C10 | S       | RYD | 0.000016 |
| 165 | C10 | PX      | MIN | 1.220922 |
| 166 | C10 | PX      | RYD | 0.004335 |
| 167 | C10 | PY      | MIN | 1.127537 |
| 168 | C10 | PY      | RYD | 0.003594 |
| 169 | C10 | PZ      | MIN | 0.889253 |
| 170 | C10 | PZ      | RYD | 0.002249 |
| 171 | C10 | DXY     | RYD | 0.001857 |
| 172 | C10 | DXZ     | RYD | 0.000047 |
| 173 | C10 | DYZ     | RYD | 0.001501 |
| 174 | C10 | DXX-YY  | RYD | 0.002020 |
| 175 | C10 | D3ZZ-RR | RYD | 0.001518 |
| 176 | H16 | S       | MIN | 0.782447 |
| 177 | H16 | S       | RYD | 0.000416 |
| 178 | H16 | PX      | RYD | 0.000420 |
| 179 | H16 | PY      | RYD | 0.000203 |
| 180 | H16 | PZ      | RYD | 0.000087 |
| 181 | H18 | S       | MIN | 0.764824 |
| 182 | H18 | S       | RYD | 0.000813 |
| 183 | H18 | PX      | RYD | 0.000526 |
| 184 | H18 | PY      | RYD | 0.000101 |
| 185 | H18 | PZ      | RYD | 0.000072 |

Total MIN occupancy: 67.762094  
Total RYD occupancy: 0.237906  
Total occupancy: 68.000000

#### Natural Atomic Populations and Charges

| Atom  | Occupancy | Charge    |
|-------|-----------|-----------|
| ----- | -----     | -----     |
| H1    | 0.763582  | 0.236418  |
| C1    | 6.196243  | -0.196243 |
| C2    | 6.245483  | -0.245483 |



|     |          |           |
|-----|----------|-----------|
| C3  | 6.132393 | -0.132393 |
| C4  | 6.238510 | -0.238510 |
| C5  | 6.198625 | -0.198625 |
| C6  | 5.716518 | 0.283482  |
| C7  | 6.181153 | -0.181153 |
| H3  | 0.764883 | 0.235117  |
| H4  | 0.764701 | 0.235299  |
| N1  | 7.526719 | -0.526719 |
| H6  | 0.752895 | 0.247105  |
| C8  | 5.904430 | 0.095570  |
| H8  | 0.762037 | 0.237963  |
| C10 | 6.301918 | -0.301918 |
| H16 | 0.783574 | 0.216426  |
| H18 | 0.766336 | 0.233664  |

Total Charge = 0.000000

Q-minus(NAO) = -0.5267

Q-plus(NAO) = 0.2471

Reason for exit: Normal completion

Wall Time: 000:00:00

CPU Time: 000:00:00

Job WF28826 started on DESKTOP-T7TL8TH at Thu Mar 09 16:34:24 2023  
Jaguar version 3.5, release 42

Job name: Ic  
Task: Geometry optimization

Stoichiometry: C10NH90  
Molecular weight: 159.07 amu  
Molecular charge: 0  
Spin multiplicity: 1  
Point Group: Cs

SCF method: RHF  
Basis set: 6-31G\*\*  
Basis functions: 225

Total electrons: 84  
Alpha electrons: 42  
Beta electrons: 42  
Total orbitals: 225  
Core orbitals: 42  
Open-shell orbitals: 0  
Occupied orbitals: 42  
Shells: 1

Non-default options chosen:

Geometry will be optimized in redundant internal coordinates  
Initial Hessian: from previous calculation

WARNING: Hessian has too many zero eigenvalues  
Some coordinates may be inadvertently frozen

| Iter                                                                                           | Energy        | Gmax      | Grms      | Dmax      | Drms      |
|------------------------------------------------------------------------------------------------|---------------|-----------|-----------|-----------|-----------|
| 1                                                                                              | -513.167325 * | 0.05664   | 0.01460   | 0.09735   | 0.03556   |
| WARNING: Hessian has too many zero eigenvalues<br>Some coordinates may be inadvertently frozen |               |           |           |           |           |
| 2                                                                                              | -513.181510 . | 0.01790   | 0.00458   | 0.03899   | 0.01180   |
| WARNING: Hessian has too many zero eigenvalues<br>Some coordinates may be inadvertently frozen |               |           |           |           |           |
| 3                                                                                              | -513.183031 . | 0.00552   | 0.00168   | 0.01433   | 0.00419   |
| WARNING: Hessian has too many zero eigenvalues<br>Some coordinates may be inadvertently frozen |               |           |           |           |           |
| 4                                                                                              | -513.183221 . | 0.00361   | 0.00073   | 0.00674   | 0.00161   |
| WARNING: Hessian has too many zero eigenvalues<br>Some coordinates may be inadvertently frozen |               |           |           |           |           |
| 5                                                                                              | -513.183208 * | 0.00068   | 0.00017 * | 0.00124 * | 0.00045 * |
| WARNING: Hessian has too many zero eigenvalues<br>Some coordinates may be inadvertently frozen |               |           |           |           |           |
| 6                                                                                              | -513.183207 # | 0.00023 * | 0.00006 * | 0.00070 * | 0.00015 # |

\*\*\*\*\*  
 \*\* Geometry optimization complete \*\*  
 \*\*\*\*\*

Final energy ..... -513.18320745742

Job WF28826 completed on DESKTOP-T7TL8TH at Thu Mar 09 16:36:12 2023

Wall Time: 000:01:47

CPU Time: 000:00:00

TITAN Properties Program: (PC/x86)

Release 6.0.2

Closed-Shell Molecular Orbital Coefficients

| MO:          |        | 1          | 2          | 3          | 4          | 5          |
|--------------|--------|------------|------------|------------|------------|------------|
| Eigenvalues: |        | -20.60019  | -15.54147  | -11.31105  | -11.28860  | -11.27098  |
| (ev):        |        | -560.55981 | -422.90511 | -307.78945 | -307.17847 | -306.69918 |
|              |        | A          | A          | A          | A          | A          |
| 1            | H1 S   | -0.00001   | -0.00005   | 0.00007    | 0.00003    | -0.00006   |
| 2            | H1 S   | -0.00020   | -0.00039   | -0.00029   | 0.00013    | -0.00068   |
| 3            | H1 PX  | 0.00001    | 0.00000    | -0.00013   | -0.00001   | 0.00000    |
| 4            | H1 PY  | 0.00002    | 0.00001    | 0.00003    | 0.00002    | 0.00004    |
| 5            | H1 PZ  | 0.00000    | 0.00000    | 0.00000    | 0.00000    | 0.00000    |
| 6            | C1 S   | 0.00002    | 0.00003    | 0.00919    | 0.00000    | 0.00007    |
| 7            | C1 S   | 0.00013    | 0.00012    | 0.00016    | 0.00016    | 0.00031    |
| 8            | C1 PX  | 0.00001    | -0.00003   | 0.00008    | 0.00000    | -0.00008   |
| 9            | C1 PY  | -0.00003   | -0.00001   | 0.00005    | -0.00012   | -0.00006   |
| 10           | C1 PZ  | 0.00000    | 0.00000    | 0.00000    | 0.00000    | 0.00000    |
| 11           | C1 S   | -0.00169   | -0.00136   | 0.00161    | -0.00311   | -0.00240   |
| 12           | C1 PX  | 0.00083    | 0.00120    | -0.00013   | 0.00049    | 0.00174    |
| 13           | C1 PY  | -0.00028   | 0.00004    | 0.00003    | 0.00039    | 0.00018    |
| 14           | C1 PZ  | 0.00000    | 0.00000    | 0.00000    | 0.00000    | 0.00000    |
| 15           | C1 DXX | 0.00002    | 0.00000    | -0.00037   | 0.00004    | -0.00005   |
| 16           | C1 DYY | -0.00010   | 0.00002    | -0.00038   | -0.00013   | -0.00006   |
| 17           | C1 DZZ | 0.00002    | 0.00006    | -0.00002   | 0.00001    | 0.00014    |
| 18           | C1 DXY | 0.00005    | 0.00000    | -0.00004   | 0.00002    | 0.00002    |
| 19           | C1 DXZ | 0.00000    | 0.00000    | 0.00000    | 0.00000    | 0.00000    |
| 20           | C1 DYZ | 0.00000    | 0.00000    | 0.00000    | 0.00000    | 0.00000    |
| 21           | C2 S   | 0.00001    | -0.00002   | -0.00026   | 0.00004    | -0.01405   |
| 22           | C2 S   | 0.00003    | -0.00005   | -0.00052   | 0.00016    | -0.00066   |
| 23           | C2 PX  | 0.00001    | -0.00001   | -0.00007   | 0.00001    | 0.00014    |
| 24           | C2 PY  | 0.00000    | 0.00004    | -0.00004   | -0.00006   | -0.00001   |
| 25           | C2 PZ  | 0.00000    | 0.00000    | 0.00000    | 0.00000    | 0.00000    |
| 26           | C2 S   | -0.00023   | 0.00058    | 0.00426    | -0.00241   | -0.00107   |
| 27           | C2 PX  | 0.00007    | 0.00032    | 0.00295    | -0.00124   | -0.00053   |
| 28           | C2 PY  | -0.00030   | -0.00064   | 0.00034    | -0.00086   | -0.00083   |
| 29           | C2 PZ  | 0.00000    | 0.00000    | 0.00000    | 0.00000    | 0.00000    |
| 30           | C2 DXX | 0.00000    | -0.00013   | 0.00005    | 0.00000    | 0.00055    |
| 31           | C2 DYY | 0.00001    | 0.00003    | 0.00018    | -0.00003   | 0.00055    |
| 32           | C2 DZZ | 0.00001    | -0.00002   | -0.00021   | 0.00005    | 0.00010    |

|    |    |     |          |          |          |          |          |
|----|----|-----|----------|----------|----------|----------|----------|
| 33 | C2 | DXY | -0.00001 | -0.00002 | 0.00001  | -0.00002 | -0.00027 |
| 34 | C2 | DXZ | 0.00000  | 0.00000  | 0.00000  | 0.00000  | 0.00000  |
| 35 | C2 | DYZ | 0.00000  | 0.00000  | 0.00000  | 0.00000  | 0.00000  |
| 36 | C3 | S   | 0.00000  | -0.00001 | -0.00040 | -0.00002 | -0.01165 |
| 37 | C3 | S   | 0.00000  | 0.00002  | -0.00014 | -0.00006 | -0.00028 |
| 38 | C3 | PX  | 0.00002  | -0.00003 | 0.00012  | 0.00001  | -0.00004 |
| 39 | C3 | PY  | 0.00000  | -0.00003 | -0.00019 | -0.00007 | -0.00002 |
| 40 | C3 | PZ  | 0.00000  | 0.00000  | 0.00000  | 0.00000  | 0.00000  |
| 41 | C3 | S   | -0.00012 | 0.00005  | -0.00315 | -0.00002 | -0.00731 |
| 42 | C3 | PX  | -0.00034 | -0.00120 | -0.00315 | 0.00013  | 0.00169  |
| 43 | C3 | PY  | 0.00070  | 0.00083  | 0.00468  | 0.00225  | 0.00292  |
| 44 | C3 | PZ  | 0.00000  | 0.00000  | 0.00000  | 0.00000  | 0.00000  |
| 45 | C3 | DXX | 0.00000  | -0.00002 | 0.00005  | -0.00005 | 0.00047  |
| 46 | C3 | DYY | 0.00001  | -0.00006 | 0.00009  | 0.00005  | 0.00036  |
| 47 | C3 | DZZ | 0.00000  | 0.00001  | -0.00004 | -0.00003 | 0.00018  |
| 48 | C3 | DXY | 0.00002  | 0.00005  | 0.00000  | 0.00003  | 0.00020  |
| 49 | C3 | DXZ | 0.00000  | 0.00000  | 0.00000  | 0.00000  | 0.00000  |
| 50 | C3 | DYZ | 0.00000  | 0.00000  | 0.00000  | 0.00000  | 0.00000  |
| 51 | C4 | S   | -0.00001 | -0.00001 | 0.99568  | 0.00071  | -0.00010 |
| 52 | C4 | S   | 0.00031  | -0.00007 | 0.02680  | -0.00021 | -0.00015 |
| 53 | C4 | PX  | 0.00000  | 0.00000  | -0.00004 | -0.00014 | -0.00002 |
| 54 | C4 | PY  | 0.00033  | -0.00001 | 0.00124  | -0.00006 | -0.00004 |
| 55 | C4 | PZ  | 0.00000  | 0.00000  | 0.00000  | 0.00000  | 0.00000  |
| 56 | C4 | S   | 0.00105  | 0.00170  | -0.00590 | 0.00034  | 0.00314  |
| 57 | C4 | PX  | 0.00094  | 0.00008  | 0.00006  | 0.00309  | 0.00002  |
| 58 | C4 | PY  | -0.00073 | -0.00055 | 0.00413  | 0.00151  | -0.00112 |
| 59 | C4 | PZ  | 0.00000  | 0.00000  | 0.00000  | 0.00000  | 0.00000  |
| 60 | C4 | DXX | 0.00001  | 0.00001  | -0.00131 | 0.00006  | 0.00006  |
| 61 | C4 | DYY | -0.00011 | 0.00002  | -0.00063 | 0.00024  | 0.00008  |
| 62 | C4 | DZZ | -0.00009 | -0.00002 | -0.00235 | -0.00006 | -0.00002 |
| 63 | C4 | DXY | -0.00002 | 0.00000  | -0.00018 | 0.00003  | 0.00001  |
| 64 | C4 | DXZ | 0.00000  | 0.00000  | 0.00000  | 0.00000  | 0.00000  |
| 65 | C4 | DYZ | 0.00000  | 0.00000  | 0.00000  | 0.00000  | 0.00000  |
| 66 | C5 | S   | -0.00001 | 0.00002  | 0.00599  | 0.00001  | 0.00044  |
| 67 | C5 | S   | 0.00003  | 0.00007  | 0.00048  | -0.00021 | 0.00044  |
| 68 | C5 | PX  | 0.00000  | 0.00003  | -0.00002 | 0.00004  | 0.00009  |
| 69 | C5 | PY  | 0.00002  | -0.00003 | -0.00003 | 0.00009  | -0.00011 |
| 70 | C5 | PZ  | 0.00000  | 0.00000  | 0.00000  | 0.00000  | 0.00000  |
| 71 | C5 | S   | 0.00061  | -0.00036 | 0.00017  | 0.00393  | -0.00080 |
| 72 | C5 | PX  | -0.00022 | -0.00077 | 0.00025  | 0.00137  | -0.00177 |
| 73 | C5 | PY  | -0.00018 | 0.00028  | 0.00074  | -0.00141 | 0.00094  |
| 74 | C5 | PZ  | 0.00000  | 0.00000  | 0.00000  | 0.00000  | 0.00000  |
| 75 | C5 | DXX | -0.00005 | 0.00001  | -0.00051 | -0.00001 | -0.00005 |
| 76 | C5 | DYY | -0.00003 | 0.00002  | -0.00044 | 0.00004  | -0.00013 |
| 77 | C5 | DZZ | -0.00002 | 0.00005  | -0.00008 | -0.00007 | 0.00016  |
| 78 | C5 | DXY | -0.00005 | -0.00002 | -0.00028 | 0.00002  | 0.00000  |
| 79 | C5 | DXZ | 0.00000  | 0.00000  | 0.00000  | 0.00000  | 0.00000  |
| 80 | C5 | DYZ | 0.00000  | 0.00000  | 0.00000  | 0.00000  | 0.00000  |
| 81 | C6 | S   | 0.00000  | -0.00005 | -0.00005 | -0.00003 | -0.99550 |
| 82 | C6 | S   | 0.00002  | -0.00028 | 0.00015  | -0.00005 | -0.02755 |
| 83 | C6 | PX  | -0.00001 | -0.00002 | -0.00003 | -0.00002 | -0.00007 |
| 84 | C6 | PY  | 0.00001  | -0.00011 | 0.00004  | -0.00001 | 0.00016  |
| 85 | C6 | PZ  | 0.00000  | 0.00000  | 0.00000  | 0.00000  | 0.00000  |
| 86 | C6 | S   | -0.00016 | -0.00438 | -0.00240 | 0.00110  | 0.00835  |

|     |    |     |          |          |          |          |          |
|-----|----|-----|----------|----------|----------|----------|----------|
| 87  | C6 | PX  | 0.00011  | -0.00032 | 0.00124  | 0.00018  | 0.00333  |
| 88  | C6 | PY  | -0.00030 | 0.00147  | -0.00380 | 0.00049  | 0.00370  |
| 89  | C6 | PZ  | 0.00000  | 0.00000  | 0.00000  | 0.00000  | 0.00000  |
| 90  | C6 | DXX | 0.00000  | 0.00003  | 0.00000  | 0.00003  | 0.00176  |
| 91  | C6 | DYY | 0.00000  | 0.00065  | -0.00007 | -0.00002 | 0.00099  |
| 92  | C6 | DZZ | 0.00001  | 0.00003  | 0.00001  | -0.00001 | 0.00243  |
| 93  | C6 | DXY | 0.00000  | 0.00001  | 0.00001  | -0.00004 | 0.00018  |
| 94  | C6 | DXZ | 0.00000  | 0.00000  | 0.00000  | 0.00000  | 0.00000  |
| 95  | C6 | DYZ | 0.00000  | 0.00000  | 0.00000  | 0.00000  | 0.00000  |
| 96  | C7 | S   | 0.00000  | -0.00002 | -0.00009 | -0.00001 | 0.00121  |
| 97  | C7 | S   | -0.00003 | -0.00006 | -0.00035 | -0.00006 | -0.00028 |
| 98  | C7 | PX  | 0.00000  | -0.00004 | -0.00003 | 0.00000  | 0.00006  |
| 99  | C7 | PY  | 0.00002  | -0.00004 | 0.00006  | 0.00005  | -0.00002 |
| 100 | C7 | PZ  | 0.00000  | 0.00000  | 0.00000  | 0.00000  | 0.00000  |
| 101 | C7 | S   | 0.00078  | 0.00171  | 0.00671  | 0.00146  | 0.00615  |
| 102 | C7 | PX  | -0.00038 | -0.00124 | -0.00256 | -0.00093 | -0.00422 |
| 103 | C7 | PY  | 0.00008  | 0.00079  | 0.00184  | 0.00008  | 0.00002  |
| 104 | C7 | PZ  | 0.00000  | 0.00000  | 0.00000  | 0.00000  | 0.00000  |
| 105 | C7 | DXX | 0.00000  | -0.00001 | -0.00001 | 0.00002  | -0.00010 |
| 106 | C7 | DYY | 0.00001  | 0.00000  | 0.00007  | 0.00000  | -0.00004 |
| 107 | C7 | DZZ | -0.00001 | -0.00001 | -0.00012 | -0.00001 | -0.00016 |
| 108 | C7 | DXY | 0.00000  | 0.00002  | 0.00001  | -0.00001 | 0.00008  |
| 109 | C7 | DXZ | 0.00000  | 0.00000  | 0.00000  | 0.00000  | 0.00000  |
| 110 | C7 | DYZ | 0.00000  | 0.00000  | 0.00000  | 0.00000  | 0.00000  |
| 111 | O1 | S   | 0.99462  | 0.00000  | 0.00000  | -0.00011 | 0.00001  |
| 112 | O1 | S   | 0.02130  | 0.00002  | 0.00116  | 0.00043  | 0.00006  |
| 113 | O1 | PX  | 0.00106  | 0.00001  | 0.00000  | 0.00027  | 0.00001  |
| 114 | O1 | PY  | -0.00076 | -0.00001 | -0.00026 | 0.00004  | -0.00002 |
| 115 | O1 | PZ  | 0.00000  | 0.00000  | 0.00000  | 0.00000  | 0.00000  |
| 116 | O1 | S   | 0.00409  | -0.00009 | -0.00476 | -0.00013 | -0.00018 |
| 117 | O1 | PX  | -0.00088 | -0.00003 | 0.00023  | -0.00118 | -0.00003 |
| 118 | O1 | PY  | 0.00026  | 0.00009  | 0.00320  | 0.00029  | 0.00022  |
| 119 | O1 | PZ  | 0.00000  | 0.00000  | 0.00000  | 0.00000  | 0.00000  |
| 120 | O1 | DXX | -0.00419 | 0.00002  | 0.00051  | -0.00058 | 0.00005  |
| 121 | O1 | DYY | -0.00417 | -0.00001 | -0.00067 | -0.00018 | -0.00002 |
| 122 | O1 | DZZ | -0.00394 | 0.00002  | 0.00080  | 0.00025  | 0.00005  |
| 123 | O1 | DXY | -0.00007 | 0.00000  | -0.00015 | -0.00032 | 0.00000  |
| 124 | O1 | DXZ | 0.00000  | 0.00000  | 0.00000  | 0.00000  | 0.00000  |
| 125 | O1 | DYZ | 0.00000  | 0.00000  | 0.00000  | 0.00000  | 0.00000  |
| 126 | H4 | S   | 0.00002  | -0.00006 | -0.00007 | 0.00008  | -0.00012 |
| 127 | H4 | S   | -0.00019 | -0.00028 | -0.00006 | 0.00042  | -0.00085 |
| 128 | H4 | PX  | -0.00001 | 0.00000  | 0.00006  | 0.00001  | 0.00003  |
| 129 | H4 | PY  | 0.00003  | 0.00002  | -0.00005 | 0.00002  | 0.00002  |
| 130 | H4 | PZ  | 0.00000  | 0.00000  | 0.00000  | 0.00000  | 0.00000  |
| 131 | N1 | S   | 0.00000  | -0.99524 | 0.00001  | -0.00001 | 0.00032  |
| 132 | N1 | S   | 0.00000  | -0.02514 | 0.00002  | -0.00002 | -0.00071 |
| 133 | N1 | PX  | 0.00000  | -0.00166 | 0.00001  | -0.00002 | 0.00008  |
| 134 | N1 | PY  | 0.00000  | -0.00131 | -0.00003 | 0.00001  | -0.00007 |
| 135 | N1 | PZ  | 0.00000  | 0.00000  | 0.00000  | 0.00000  | 0.00000  |
| 136 | N1 | S   | -0.00010 | 0.00724  | -0.00108 | 0.00018  | 0.00525  |
| 137 | N1 | PX  | 0.00005  | 0.00263  | 0.00009  | 0.00010  | 0.00106  |
| 138 | N1 | PY  | -0.00005 | 0.00147  | -0.00026 | 0.00001  | 0.00232  |
| 139 | N1 | PZ  | 0.00000  | 0.00000  | 0.00000  | 0.00000  | 0.00000  |
| 140 | N1 | DXX | 0.00001  | 0.00291  | 0.00005  | 0.00000  | 0.00014  |

|     |     |     |          |          |          |          |          |
|-----|-----|-----|----------|----------|----------|----------|----------|
| 141 | N1  | DYY | 0.00000  | 0.00252  | 0.00003  | 0.00000  | 0.00013  |
| 142 | N1  | DZZ | 0.00000  | 0.00308  | -0.00001 | -0.00002 | -0.00047 |
| 143 | N1  | DXY | 0.00000  | -0.00012 | -0.00001 | 0.00000  | 0.00004  |
| 144 | N1  | DXZ | 0.00000  | 0.00000  | 0.00000  | 0.00000  | 0.00000  |
| 145 | N1  | DYZ | 0.00000  | 0.00000  | 0.00000  | 0.00000  | 0.00000  |
| 146 | H6  | S   | 0.00001  | -0.00001 | 0.00008  | -0.00003 | -0.00007 |
| 147 | H6  | S   | 0.00001  | 0.00002  | 0.00096  | -0.00035 | -0.00021 |
| 148 | H6  | PX  | 0.00000  | 0.00002  | -0.00001 | 0.00000  | -0.00010 |
| 149 | H6  | PY  | 0.00001  | 0.00005  | 0.00002  | 0.00002  | 0.00000  |
| 150 | H6  | PZ  | 0.00000  | 0.00000  | 0.00000  | 0.00000  | 0.00000  |
| 151 | C8  | S   | 0.00000  | -0.00001 | 0.00004  | 0.00000  | -0.00040 |
| 152 | C8  | S   | 0.00002  | -0.00038 | 0.00013  | 0.00000  | 0.00030  |
| 153 | C8  | PX  | 0.00000  | 0.00016  | -0.00006 | 0.00000  | 0.00010  |
| 154 | C8  | PY  | 0.00000  | -0.00008 | 0.00005  | -0.00003 | 0.00005  |
| 155 | C8  | PZ  | 0.00000  | 0.00000  | 0.00000  | 0.00000  | 0.00000  |
| 156 | C8  | S   | -0.00029 | -0.00284 | -0.00122 | -0.00071 | -0.00342 |
| 157 | C8  | PX  | -0.00006 | 0.00211  | 0.00006  | -0.00023 | 0.00031  |
| 158 | C8  | PY  | -0.00023 | -0.00161 | -0.00227 | 0.00013  | -0.00500 |
| 159 | C8  | PZ  | 0.00000  | 0.00000  | 0.00000  | 0.00000  | 0.00000  |
| 160 | C8  | DXX | -0.00001 | 0.00030  | -0.00001 | -0.00001 | -0.00018 |
| 161 | C8  | DYY | 0.00000  | 0.00009  | -0.00001 | 0.00000  | -0.00009 |
| 162 | C8  | DZZ | 0.00001  | 0.00009  | 0.00004  | 0.00000  | 0.00005  |
| 163 | C8  | DXY | -0.00001 | -0.00014 | -0.00003 | -0.00001 | 0.00009  |
| 164 | C8  | DXZ | 0.00000  | 0.00000  | 0.00000  | 0.00000  | 0.00000  |
| 165 | C8  | DYZ | 0.00000  | 0.00000  | 0.00000  | 0.00000  | 0.00000  |
| 166 | H8  | S   | 0.00001  | 0.00007  | -0.00003 | 0.00003  | 0.00016  |
| 167 | H8  | S   | 0.00009  | 0.00039  | 0.00053  | 0.00027  | 0.00119  |
| 168 | H8  | PX  | 0.00000  | -0.00001 | 0.00000  | 0.00000  | -0.00002 |
| 169 | H8  | PY  | 0.00000  | -0.00002 | -0.00006 | 0.00000  | 0.00001  |
| 170 | H8  | PZ  | 0.00000  | 0.00000  | 0.00000  | 0.00000  | 0.00000  |
| 171 | C10 | S   | 0.00000  | -0.00001 | -0.00001 | 0.00000  | 0.00000  |
| 172 | C10 | S   | 0.00000  | 0.00000  | 0.00000  | -0.00002 | -0.00003 |
| 173 | C10 | PX  | 0.00000  | 0.00000  | -0.00003 | -0.00001 | 0.00006  |
| 174 | C10 | PY  | 0.00000  | 0.00000  | -0.00006 | 0.00001  | -0.00008 |
| 175 | C10 | PZ  | 0.00000  | 0.00000  | 0.00000  | 0.00000  | 0.00000  |
| 176 | C10 | S   | -0.00007 | -0.00063 | -0.00124 | 0.00036  | -0.00255 |
| 177 | C10 | PX  | 0.00007  | -0.00071 | 0.00049  | 0.00006  | 0.00015  |
| 178 | C10 | PY  | -0.00001 | -0.00027 | -0.00027 | 0.00019  | -0.00075 |
| 179 | C10 | PZ  | 0.00000  | 0.00000  | 0.00000  | 0.00000  | 0.00000  |
| 180 | C10 | DXX | 0.00000  | -0.00002 | -0.00003 | 0.00000  | -0.00007 |
| 181 | C10 | DYY | 0.00000  | -0.00005 | -0.00001 | 0.00001  | 0.00002  |
| 182 | C10 | DZZ | 0.00000  | 0.00001  | -0.00002 | 0.00000  | -0.00003 |
| 183 | C10 | DXY | 0.00000  | -0.00011 | 0.00000  | 0.00000  | 0.00002  |
| 184 | C10 | DXZ | 0.00000  | 0.00000  | 0.00000  | 0.00000  | 0.00000  |
| 185 | C10 | DYZ | 0.00000  | 0.00000  | 0.00000  | 0.00000  | 0.00000  |
| 186 | H16 | S   | -0.00001 | 0.00005  | -0.00004 | -0.00002 | 0.00006  |
| 187 | H16 | S   | -0.00003 | 0.00029  | -0.00008 | -0.00003 | 0.00008  |
| 188 | H16 | PX  | 0.00000  | 0.00001  | -0.00001 | 0.00000  | -0.00003 |
| 189 | H16 | PY  | 0.00000  | 0.00000  | 0.00000  | 0.00000  | 0.00001  |
| 190 | H16 | PZ  | 0.00000  | 0.00000  | 0.00000  | 0.00000  | 0.00000  |
| 191 | H18 | S   | 0.00001  | -0.00003 | 0.00006  | 0.00000  | -0.00001 |
| 192 | H18 | S   | 0.00002  | -0.00020 | 0.00020  | 0.00004  | 0.00009  |
| 193 | H18 | PX  | 0.00000  | 0.00003  | 0.00001  | 0.00000  | 0.00002  |
| 194 | H18 | PY  | 0.00000  | 0.00002  | 0.00001  | 0.00000  | 0.00000  |

|     |     |     |          |          |          |          |          |
|-----|-----|-----|----------|----------|----------|----------|----------|
| 195 | H18 | PZ  | 0.00000  | 0.00000  | 0.00000  | 0.00000  | 0.00000  |
| 196 | C9  | S   | 0.00000  | 0.00000  | -0.00071 | 0.99583  | -0.00002 |
| 197 | C9  | S   | 0.00025  | 0.00001  | -0.00018 | 0.02763  | 0.00000  |
| 198 | C9  | PX  | -0.00038 | -0.00001 | -0.00004 | -0.00097 | -0.00001 |
| 199 | C9  | PY  | -0.00017 | 0.00000  | -0.00001 | -0.00069 | 0.00000  |
| 200 | C9  | PZ  | 0.00000  | 0.00000  | 0.00000  | 0.00000  | 0.00000  |
| 201 | C9  | S   | 0.00016  | -0.00002 | -0.00022 | -0.01224 | -0.00003 |
| 202 | C9  | PX  | 0.00021  | 0.00001  | 0.00029  | -0.00044 | 0.00004  |
| 203 | C9  | PY  | -0.00015 | -0.00001 | -0.00074 | 0.00088  | -0.00009 |
| 204 | C9  | PZ  | 0.00000  | 0.00000  | 0.00000  | 0.00000  | 0.00000  |
| 205 | C9  | DXX | 0.00008  | 0.00000  | 0.00002  | -0.00138 | -0.00001 |
| 206 | C9  | DYY | 0.00004  | 0.00001  | 0.00020  | -0.00148 | 0.00001  |
| 207 | C9  | DZZ | 0.00003  | 0.00001  | 0.00005  | -0.00156 | 0.00001  |
| 208 | C9  | DXY | 0.00005  | 0.00000  | 0.00015  | 0.00006  | 0.00001  |
| 209 | C9  | DXZ | 0.00000  | 0.00000  | 0.00000  | 0.00000  | 0.00000  |
| 210 | C9  | DYZ | 0.00000  | 0.00000  | 0.00000  | 0.00000  | 0.00000  |
| 211 | H3  | S   | -0.00001 | 0.00000  | 0.00009  | -0.00007 | 0.00001  |
| 212 | H3  | S   | -0.00004 | 0.00000  | 0.00025  | 0.00182  | 0.00005  |
| 213 | H3  | PX  | 0.00003  | 0.00000  | 0.00004  | -0.00001 | 0.00000  |
| 214 | H3  | PY  | 0.00007  | 0.00000  | 0.00006  | 0.00014  | 0.00000  |
| 215 | H3  | PZ  | 0.00000  | 0.00000  | 0.00000  | 0.00000  | 0.00000  |
| 216 | H5  | S   | -0.00007 | 0.00000  | -0.00009 | 0.00013  | -0.00001 |
| 217 | H5  | S   | -0.00013 | 0.00001  | -0.00001 | 0.00251  | 0.00002  |
| 218 | H5  | PX  | 0.00004  | 0.00000  | -0.00003 | 0.00007  | 0.00000  |
| 219 | H5  | PY  | 0.00002  | 0.00000  | 0.00005  | -0.00007 | 0.00000  |
| 220 | H5  | PZ  | -0.00004 | 0.00000  | -0.00001 | -0.00006 | 0.00000  |
| 221 | H7  | S   | -0.00007 | 0.00000  | -0.00009 | 0.00013  | -0.00001 |
| 222 | H7  | S   | -0.00013 | 0.00001  | -0.00001 | 0.00251  | 0.00002  |
| 223 | H7  | PX  | 0.00004  | 0.00000  | -0.00003 | 0.00007  | 0.00000  |
| 224 | H7  | PY  | 0.00002  | 0.00000  | 0.00005  | -0.00007 | 0.00000  |
| 225 | H7  | PZ  | 0.00004  | 0.00000  | 0.00001  | 0.00006  | 0.00000  |

MO:                                   6                                   7                                   8                                   9                                   10  
Eigenvalues:                   -11.25727   -11.24891   -11.24274   -11.24199   -11.23919  
(ev):                           -306.32603   -306.09843   -305.93066   -305.91030   -305.83416

|    |    |     |          |          |          |          |          |
|----|----|-----|----------|----------|----------|----------|----------|
|    |    |     | A        | A        | A        | A        | A        |
| 1  | H1 | S   | 0.00007  | -0.00007 | 0.00000  | -0.00004 | -0.00004 |
| 2  | H1 | S   | 0.00072  | -0.00076 | 0.00002  | -0.00079 | -0.00029 |
| 3  | H1 | PX  | 0.00000  | -0.00001 | 0.00000  | -0.00003 | -0.00010 |
| 4  | H1 | PY  | -0.00003 | -0.00002 | 0.00001  | -0.00001 | 0.00000  |
| 5  | H1 | PZ  | 0.00000  | 0.00000  | 0.00000  | 0.00000  | 0.00000  |
| 6  | C1 | S   | -0.00006 | 0.00151  | 0.00001  | -0.00018 | 0.03839  |
| 7  | C1 | S   | -0.00015 | 0.00042  | -0.00005 | 0.00039  | 0.00120  |
| 8  | C1 | PX  | 0.00004  | -0.00004 | 0.00000  | 0.00000  | 0.00005  |
| 9  | C1 | PY  | 0.00004  | -0.00004 | 0.00000  | 0.00004  | 0.00022  |
| 10 | C1 | PZ  | 0.00000  | 0.00000  | 0.00000  | 0.00000  | 0.00000  |
| 11 | C1 | S   | 0.00158  | -0.00395 | 0.00045  | -0.00657 | 0.00164  |
| 12 | C1 | PX  | -0.00210 | 0.00227  | -0.00015 | 0.00303  | 0.00048  |
| 13 | C1 | PY  | 0.00055  | 0.00105  | -0.00017 | 0.00130  | -0.00106 |
| 14 | C1 | PZ  | 0.00000  | 0.00000  | 0.00000  | 0.00000  | 0.00000  |
| 15 | C1 | DXX | 0.00000  | -0.00013 | -0.00001 | -0.00008 | -0.00045 |
| 16 | C1 | DYY | -0.00006 | -0.00012 | 0.00002  | -0.00008 | -0.00082 |
| 17 | C1 | DZZ | -0.00007 | 0.00014  | -0.00002 | 0.00012  | -0.00022 |

|    |    |     |          |          |          |          |          |
|----|----|-----|----------|----------|----------|----------|----------|
| 18 | C1 | DXY | -0.00001 | 0.00004  | 0.00000  | -0.00002 | -0.00017 |
| 19 | C1 | DXZ | 0.00000  | 0.00000  | 0.00000  | 0.00000  | 0.00000  |
| 20 | C1 | DYZ | 0.00000  | 0.00000  | 0.00000  | 0.00000  | 0.00000  |
| 21 | C2 | S   | 0.00024  | -0.11731 | 0.00107  | 0.98857  | 0.00315  |
| 22 | C2 | S   | 0.00012  | -0.00312 | 0.00003  | 0.02750  | -0.00008 |
| 23 | C2 | PX  | 0.00003  | 0.00003  | 0.00001  | 0.00033  | -0.00004 |
| 24 | C2 | PY  | -0.00007 | 0.00016  | -0.00001 | 0.00003  | 0.00000  |
| 25 | C2 | PZ  | 0.00000  | 0.00000  | 0.00000  | 0.00000  | 0.00000  |
| 26 | C2 | S   | -0.00051 | -0.00008 | 0.00000  | -0.01013 | 0.00102  |
| 27 | C2 | PX  | -0.00074 | 0.00054  | -0.00001 | -0.00046 | 0.00065  |
| 28 | C2 | PY  | -0.00083 | -0.00066 | -0.00026 | -0.00021 | 0.00034  |
| 29 | C2 | PZ  | 0.00000  | 0.00000  | 0.00000  | 0.00000  | 0.00000  |
| 30 | C2 | DXX | -0.00001 | 0.00064  | 0.00000  | -0.00155 | 0.00008  |
| 31 | C2 | DYY | 0.00004  | 0.00054  | 0.00001  | -0.00141 | 0.00006  |
| 32 | C2 | DZZ | 0.00006  | 0.00032  | 0.00000  | -0.00246 | -0.00006 |
| 33 | C2 | DXY | 0.00003  | 0.00000  | -0.00001 | 0.00013  | -0.00002 |
| 34 | C2 | DXZ | 0.00000  | 0.00000  | 0.00000  | 0.00000  | 0.00000  |
| 35 | C2 | DYZ | 0.00000  | 0.00000  | 0.00000  | 0.00000  | 0.00000  |
| 36 | C3 | S   | -0.00036 | 0.00037  | 0.00043  | -0.00331 | 0.98854  |
| 37 | C3 | S   | 0.00009  | -0.00006 | 0.00007  | -0.00020 | 0.02762  |
| 38 | C3 | PX  | -0.00005 | -0.00001 | 0.00001  | 0.00007  | -0.00019 |
| 39 | C3 | PY  | -0.00006 | -0.00003 | 0.00004  | -0.00013 | 0.00005  |
| 40 | C3 | PZ  | 0.00000  | 0.00000  | 0.00000  | 0.00000  | 0.00000  |
| 41 | C3 | S   | -0.00293 | 0.00105  | -0.00167 | -0.00070 | -0.01350 |
| 42 | C3 | PX  | 0.00324  | -0.00119 | -0.00021 | -0.00124 | 0.00071  |
| 43 | C3 | PY  | 0.00072  | 0.00328  | 0.00050  | 0.00582  | 0.00114  |
| 44 | C3 | PZ  | 0.00000  | 0.00000  | 0.00000  | 0.00000  | 0.00000  |
| 45 | C3 | DXX | -0.00003 | 0.00001  | 0.00001  | 0.00007  | -0.00182 |
| 46 | C3 | DYY | 0.00020  | 0.00006  | -0.00004 | 0.00007  | -0.00118 |
| 47 | C3 | DZZ | 0.00009  | 0.00001  | 0.00001  | -0.00001 | -0.00234 |
| 48 | C3 | DXY | -0.00007 | 0.00001  | 0.00000  | 0.00004  | -0.00015 |
| 49 | C3 | DXZ | 0.00000  | 0.00000  | 0.00000  | 0.00000  | 0.00000  |
| 50 | C3 | DYZ | 0.00000  | 0.00000  | 0.00000  | 0.00000  | 0.00000  |
| 51 | C4 | S   | 0.00000  | 0.00622  | 0.00001  | 0.00089  | -0.00001 |
| 52 | C4 | S   | 0.00012  | -0.00010 | 0.00004  | -0.00028 | -0.00027 |
| 53 | C4 | PX  | 0.00000  | -0.00008 | 0.00000  | 0.00001  | 0.00002  |
| 54 | C4 | PY  | 0.00000  | -0.00004 | 0.00000  | 0.00000  | 0.00003  |
| 55 | C4 | PZ  | 0.00000  | 0.00000  | 0.00000  | 0.00000  | 0.00000  |
| 56 | C4 | S   | -0.00268 | -0.00152 | -0.00021 | 0.00195  | 0.00081  |
| 57 | C4 | PX  | -0.00053 | 0.00173  | -0.00004 | 0.00153  | 0.00006  |
| 58 | C4 | PY  | 0.00130  | -0.00142 | 0.00038  | -0.00268 | -0.00131 |
| 59 | C4 | PZ  | 0.00000  | 0.00000  | 0.00000  | 0.00000  | 0.00000  |
| 60 | C4 | DXX | 0.00000  | 0.00067  | 0.00001  | 0.00012  | 0.00006  |
| 61 | C4 | DYY | -0.00001 | 0.00025  | 0.00001  | 0.00003  | 0.00008  |
| 62 | C4 | DZZ | 0.00004  | 0.00006  | 0.00001  | -0.00007 | -0.00007 |
| 63 | C4 | DXY | 0.00000  | 0.00002  | 0.00000  | 0.00003  | -0.00005 |
| 64 | C4 | DXZ | 0.00000  | 0.00000  | 0.00000  | 0.00000  | 0.00000  |
| 65 | C4 | DYZ | 0.00000  | 0.00000  | 0.00000  | 0.00000  | 0.00000  |
| 66 | C5 | S   | -0.00014 | -0.98859 | -0.00008 | -0.11796 | 0.00004  |
| 67 | C5 | S   | -0.00014 | -0.02735 | -0.00001 | -0.00346 | 0.00003  |
| 68 | C5 | PX  | -0.00002 | -0.00029 | 0.00001  | 0.00004  | -0.00004 |
| 69 | C5 | PY  | 0.00005  | 0.00001  | 0.00001  | 0.00018  | 0.00003  |
| 70 | C5 | PZ  | 0.00000  | 0.00000  | 0.00000  | 0.00000  | 0.00000  |
| 71 | C5 | S   | 0.00160  | 0.01017  | 0.00029  | 0.00455  | -0.00095 |



|     |    |     |          |          |          |          |          |
|-----|----|-----|----------|----------|----------|----------|----------|
| 72  | C5 | PX  | 0.00073  | 0.00075  | 0.00002  | -0.00013 | -0.00026 |
| 73  | C5 | PY  | -0.00113 | 0.00058  | -0.00020 | -0.00038 | 0.00058  |
| 74  | C5 | PZ  | 0.00000  | 0.00000  | 0.00000  | 0.00000  | 0.00000  |
| 75  | C5 | DXX | 0.00000  | 0.00177  | 0.00000  | -0.00019 | -0.00005 |
| 76  | C5 | DYY | -0.00002 | 0.00140  | 0.00000  | -0.00025 | -0.00004 |
| 77  | C5 | DZZ | -0.00006 | 0.00246  | 0.00000  | 0.00025  | -0.00002 |
| 78  | C5 | DXY | -0.00001 | -0.00007 | 0.00000  | 0.00005  | 0.00001  |
| 79  | C5 | DXZ | 0.00000  | 0.00000  | 0.00000  | 0.00000  | 0.00000  |
| 80  | C5 | DYZ | 0.00000  | 0.00000  | 0.00000  | 0.00000  | 0.00000  |
| 81  | C6 | S   | -0.00046 | 0.00136  | -0.00006 | -0.01430 | -0.01185 |
| 82  | C6 | S   | -0.00039 | 0.00028  | -0.00006 | -0.00024 | -0.00022 |
| 83  | C6 | PX  | -0.00005 | -0.00001 | -0.00004 | 0.00008  | -0.00007 |
| 84  | C6 | PY  | -0.00008 | 0.00009  | 0.00004  | 0.00003  | 0.00002  |
| 85  | C6 | PZ  | 0.00000  | 0.00000  | 0.00000  | 0.00000  | 0.00000  |
| 86  | C6 | S   | 0.00492  | -0.00025 | -0.00007 | 0.00468  | 0.00478  |
| 87  | C6 | PX  | 0.00336  | 0.00005  | 0.00043  | 0.00014  | 0.00194  |
| 88  | C6 | PY  | -0.00061 | -0.00310 | -0.00001 | -0.00259 | -0.00091 |
| 89  | C6 | PZ  | 0.00000  | 0.00000  | 0.00000  | 0.00000  | 0.00000  |
| 90  | C6 | DXX | 0.00008  | 0.00005  | -0.00001 | -0.00041 | -0.00057 |
| 91  | C6 | DYY | 0.00015  | -0.00004 | -0.00001 | -0.00039 | -0.00024 |
| 92  | C6 | DZZ | -0.00010 | 0.00007  | -0.00003 | -0.00006 | -0.00010 |
| 93  | C6 | DXY | -0.00004 | 0.00004  | 0.00003  | 0.00020  | -0.00004 |
| 94  | C6 | DXZ | 0.00000  | 0.00000  | 0.00000  | 0.00000  | 0.00000  |
| 95  | C6 | DYZ | 0.00000  | 0.00000  | 0.00000  | 0.00000  | 0.00000  |
| 96  | C7 | S   | 0.01480  | -0.00004 | 0.00235  | -0.00009 | 0.11103  |
| 97  | C7 | S   | 0.00054  | -0.00009 | 0.00008  | -0.00020 | 0.00281  |
| 98  | C7 | PX  | 0.00005  | 0.00000  | 0.00004  | -0.00004 | 0.00015  |
| 99  | C7 | PY  | 0.00007  | 0.00003  | -0.00005 | 0.00009  | -0.00016 |
| 100 | C7 | PZ  | 0.00000  | 0.00000  | 0.00000  | 0.00000  | 0.00000  |
| 101 | C7 | S   | 0.00392  | 0.00270  | 0.00149  | 0.00542  | 0.00391  |
| 102 | C7 | PX  | -0.00076 | -0.00124 | -0.00096 | -0.00256 | -0.00115 |
| 103 | C7 | PY  | -0.00278 | 0.00045  | 0.00045  | 0.00076  | 0.00108  |
| 104 | C7 | PZ  | 0.00000  | 0.00000  | 0.00000  | 0.00000  | 0.00000  |
| 105 | C7 | DXX | -0.00062 | 0.00001  | -0.00005 | 0.00005  | -0.00074 |
| 106 | C7 | DYY | -0.00041 | 0.00001  | -0.00009 | 0.00002  | -0.00049 |
| 107 | C7 | DZZ | -0.00014 | -0.00003 | -0.00002 | -0.00005 | -0.00037 |
| 108 | C7 | DXY | -0.00023 | 0.00001  | -0.00007 | -0.00001 | 0.00008  |
| 109 | C7 | DXZ | 0.00000  | 0.00000  | 0.00000  | 0.00000  | 0.00000  |
| 110 | C7 | DYZ | 0.00000  | 0.00000  | 0.00000  | 0.00000  | 0.00000  |
| 111 | O1 | S   | 0.00000  | -0.00005 | 0.00001  | -0.00005 | -0.00003 |
| 112 | O1 | S   | 0.00000  | -0.00010 | 0.00003  | -0.00021 | -0.00013 |
| 113 | O1 | PX  | -0.00001 | -0.00001 | 0.00000  | 0.00003  | 0.00000  |
| 114 | O1 | PY  | 0.00001  | 0.00001  | 0.00000  | 0.00001  | 0.00002  |
| 115 | O1 | PZ  | 0.00000  | 0.00000  | 0.00000  | 0.00000  | 0.00000  |
| 116 | O1 | S   | -0.00015 | 0.00130  | -0.00025 | 0.00160  | 0.00086  |
| 117 | O1 | PX  | 0.00009  | -0.00005 | 0.00001  | -0.00033 | -0.00004 |
| 118 | O1 | PY  | -0.00003 | -0.00029 | 0.00007  | -0.00043 | -0.00027 |
| 119 | O1 | PZ  | 0.00000  | 0.00000  | 0.00000  | 0.00000  | 0.00000  |
| 120 | O1 | DXX | 0.00000  | -0.00020 | 0.00002  | -0.00015 | -0.00010 |
| 121 | O1 | DYY | 0.00002  | -0.00018 | 0.00002  | -0.00013 | -0.00008 |
| 122 | O1 | DZZ | -0.00001 | -0.00006 | 0.00002  | -0.00010 | -0.00008 |
| 123 | O1 | DXY | -0.00001 | -0.00007 | 0.00000  | 0.00004  | -0.00001 |
| 124 | O1 | DXZ | 0.00000  | 0.00000  | 0.00000  | 0.00000  | 0.00000  |
| 125 | O1 | DYZ | 0.00000  | 0.00000  | 0.00000  | 0.00000  | 0.00000  |

|     |     |     |          |          |          |          |          |
|-----|-----|-----|----------|----------|----------|----------|----------|
| 126 | H4  | S   | 0.00006  | 0.00021  | 0.00000  | 0.00002  | -0.00001 |
| 127 | H4  | S   | 0.00042  | -0.00187 | 0.00004  | -0.00042 | -0.00012 |
| 128 | H4  | PX  | 0.00000  | 0.00017  | 0.00000  | 0.00010  | 0.00001  |
| 129 | H4  | PY  | 0.00000  | -0.00014 | 0.00000  | -0.00016 | -0.00002 |
| 130 | H4  | PZ  | 0.00000  | 0.00000  | 0.00000  | 0.00000  | 0.00000  |
| 131 | N1  | S   | -0.00011 | 0.00004  | -0.00004 | 0.00007  | 0.00009  |
| 132 | N1  | S   | 0.00073  | 0.00017  | 0.00001  | 0.00016  | 0.00025  |
| 133 | N1  | PX  | 0.00005  | -0.00001 | -0.00001 | 0.00005  | 0.00006  |
| 134 | N1  | PY  | -0.00010 | 0.00000  | -0.00004 | -0.00001 | 0.00002  |
| 135 | N1  | PZ  | 0.00000  | 0.00000  | 0.00000  | 0.00000  | 0.00000  |
| 136 | N1  | S   | -0.00348 | -0.00217 | 0.00092  | -0.00301 | -0.00300 |
| 137 | N1  | PX  | -0.00214 | 0.00016  | 0.00018  | -0.00010 | -0.00081 |
| 138 | N1  | PY  | -0.00012 | -0.00084 | 0.00014  | -0.00087 | -0.00048 |
| 139 | N1  | PZ  | 0.00000  | 0.00000  | 0.00000  | 0.00000  | 0.00000  |
| 140 | N1  | DXX | -0.00050 | 0.00011  | -0.00014 | 0.00019  | 0.00020  |
| 141 | N1  | DYY | -0.00003 | 0.00003  | -0.00012 | 0.00017  | 0.00021  |
| 142 | N1  | DZZ | 0.00041  | 0.00008  | -0.00002 | 0.00007  | 0.00018  |
| 143 | N1  | DXY | 0.00011  | 0.00003  | 0.00009  | 0.00001  | 0.00003  |
| 144 | N1  | DXZ | 0.00000  | 0.00000  | 0.00000  | 0.00000  | 0.00000  |
| 145 | N1  | DYZ | 0.00000  | 0.00000  | 0.00000  | 0.00000  | 0.00000  |
| 146 | H6  | S   | -0.00004 | 0.00001  | -0.00001 | -0.00030 | 0.00002  |
| 147 | H6  | S   | -0.00034 | 0.00004  | -0.00003 | 0.00177  | 0.00031  |
| 148 | H6  | PX  | 0.00000  | -0.00010 | 0.00000  | -0.00026 | 0.00000  |
| 149 | H6  | PY  | -0.00001 | -0.00008 | 0.00001  | -0.00007 | -0.00002 |
| 150 | H6  | PZ  | 0.00000  | 0.00000  | 0.00000  | 0.00000  | 0.00000  |
| 151 | C8  | S   | 0.99379  | -0.00007 | 0.05930  | -0.00027 | -0.00132 |
| 152 | C8  | S   | 0.02729  | 0.00007  | 0.00197  | 0.00013  | -0.00008 |
| 153 | C8  | PX  | -0.00029 | -0.00003 | 0.00000  | -0.00007 | -0.00002 |
| 154 | C8  | PY  | 0.00028  | 0.00001  | -0.00020 | 0.00005  | 0.00006  |
| 155 | C8  | PZ  | 0.00000  | 0.00000  | 0.00000  | 0.00000  | 0.00000  |
| 156 | C8  | S   | -0.01057 | -0.00080 | -0.00566 | -0.00118 | 0.00029  |
| 157 | C8  | PX  | -0.00396 | -0.00008 | -0.00014 | -0.00048 | -0.00103 |
| 158 | C8  | PY  | -0.00032 | -0.00072 | 0.00107  | -0.00160 | -0.00039 |
| 159 | C8  | PZ  | 0.00000  | 0.00000  | 0.00000  | 0.00000  | 0.00000  |
| 160 | C8  | DXX | -0.00159 | 0.00000  | 0.00027  | -0.00001 | 0.00002  |
| 161 | C8  | DYY | -0.00110 | 0.00001  | 0.00023  | 0.00004  | 0.00014  |
| 162 | C8  | DZZ | -0.00236 | 0.00003  | -0.00003 | 0.00006  | 0.00003  |
| 163 | C8  | DXY | -0.00028 | -0.00001 | 0.00000  | -0.00004 | 0.00000  |
| 164 | C8  | DXZ | 0.00000  | 0.00000  | 0.00000  | 0.00000  | 0.00000  |
| 165 | C8  | DYZ | 0.00000  | 0.00000  | 0.00000  | 0.00000  | 0.00000  |
| 166 | H8  | S   | -0.00007 | 0.00001  | 0.00004  | 0.00002  | -0.00003 |
| 167 | H8  | S   | -0.00030 | 0.00031  | 0.00033  | 0.00060  | 0.00017  |
| 168 | H8  | PX  | -0.00009 | 0.00000  | -0.00001 | 0.00002  | -0.00011 |
| 169 | H8  | PY  | 0.00011  | 0.00000  | -0.00003 | -0.00001 | 0.00001  |
| 170 | H8  | PZ  | 0.00000  | 0.00000  | 0.00000  | 0.00000  | 0.00000  |
| 171 | C10 | S   | 0.05863  | -0.00006 | -0.99390 | 0.00105  | 0.00061  |
| 172 | C10 | S   | 0.00135  | 0.00000  | -0.02744 | 0.00004  | 0.00001  |
| 173 | C10 | PX  | 0.00004  | -0.00002 | -0.00010 | -0.00002 | -0.00002 |
| 174 | C10 | PY  | -0.00025 | -0.00001 | -0.00004 | -0.00004 | -0.00005 |
| 175 | C10 | PZ  | 0.00000  | 0.00000  | 0.00000  | 0.00000  | 0.00000  |
| 176 | C10 | S   | 0.00315  | -0.00028 | 0.01163  | -0.00076 | -0.00023 |
| 177 | C10 | PX  | 0.00125  | 0.00025  | -0.00017 | 0.00053  | 0.00066  |
| 178 | C10 | PY  | 0.00174  | -0.00008 | 0.00101  | -0.00018 | 0.00009  |
| 179 | C10 | PZ  | 0.00000  | 0.00000  | 0.00000  | 0.00000  | 0.00000  |

|     |     |     |          |          |          |          |          |
|-----|-----|-----|----------|----------|----------|----------|----------|
| 180 | C10 | DXX | -0.00058 | -0.00001 | 0.00167  | -0.00002 | -0.00001 |
| 181 | C10 | DYY | -0.00050 | 0.00000  | 0.00145  | -0.00002 | -0.00002 |
| 182 | C10 | DZZ | -0.00023 | 0.00000  | 0.00256  | 0.00000  | -0.00001 |
| 183 | C10 | DXY | 0.00008  | 0.00001  | 0.00008  | 0.00002  | 0.00005  |
| 184 | C10 | DXZ | 0.00000  | 0.00000  | 0.00000  | 0.00000  | 0.00000  |
| 185 | C10 | DYZ | 0.00000  | 0.00000  | 0.00000  | 0.00000  | 0.00000  |
| 186 | H16 | S   | -0.00010 | -0.00002 | 0.00027  | -0.00004 | -0.00006 |
| 187 | H16 | S   | -0.00052 | -0.00010 | -0.00197 | -0.00017 | -0.00019 |
| 188 | H16 | PX  | -0.00012 | 0.00000  | -0.00028 | 0.00000  | -0.00001 |
| 189 | H16 | PY  | 0.00009  | 0.00000  | 0.00003  | 0.00000  | 0.00000  |
| 190 | H16 | PZ  | 0.00000  | 0.00000  | 0.00000  | 0.00000  | 0.00000  |
| 191 | H18 | S   | 0.00012  | 0.00003  | 0.00022  | 0.00006  | 0.00006  |
| 192 | H18 | S   | 0.00066  | 0.00006  | -0.00194 | 0.00016  | 0.00027  |
| 193 | H18 | PX  | 0.00006  | 0.00000  | 0.00020  | 0.00000  | -0.00001 |
| 194 | H18 | PY  | 0.00013  | 0.00000  | 0.00011  | 0.00000  | 0.00000  |
| 195 | H18 | PZ  | 0.00000  | 0.00000  | 0.00000  | 0.00000  | 0.00000  |
| 196 | C9  | S   | 0.00000  | 0.00005  | 0.00000  | 0.00001  | 0.00000  |
| 197 | C9  | S   | 0.00000  | 0.00002  | 0.00000  | 0.00005  | -0.00004 |
| 198 | C9  | PX  | 0.00001  | -0.00001 | 0.00000  | -0.00001 | 0.00000  |
| 199 | C9  | PY  | -0.00001 | -0.00001 | 0.00000  | -0.00003 | 0.00002  |
| 200 | C9  | PZ  | 0.00000  | 0.00000  | 0.00000  | 0.00000  | 0.00000  |
| 201 | C9  | S   | -0.00001 | -0.00025 | 0.00001  | -0.00014 | 0.00014  |
| 202 | C9  | PX  | -0.00001 | -0.00009 | 0.00002  | -0.00010 | -0.00002 |
| 203 | C9  | PY  | 0.00011  | 0.00020  | -0.00003 | 0.00021  | -0.00017 |
| 204 | C9  | PZ  | 0.00000  | 0.00000  | 0.00000  | 0.00000  | 0.00000  |
| 205 | C9  | DXX | 0.00000  | 0.00006  | 0.00000  | 0.00004  | 0.00000  |
| 206 | C9  | DYY | 0.00000  | 0.00001  | 0.00000  | 0.00002  | -0.00001 |
| 207 | C9  | DZZ | 0.00000  | 0.00000  | 0.00000  | 0.00002  | -0.00002 |
| 208 | C9  | DXY | -0.00001 | 0.00002  | 0.00000  | 0.00001  | 0.00001  |
| 209 | C9  | DXZ | 0.00000  | 0.00000  | 0.00000  | 0.00000  | 0.00000  |
| 210 | C9  | DYZ | 0.00000  | 0.00000  | 0.00000  | 0.00000  | 0.00000  |
| 211 | H3  | S   | -0.00001 | 0.00000  | 0.00000  | -0.00001 | 0.00001  |
| 212 | H3  | S   | -0.00006 | -0.00009 | 0.00002  | -0.00011 | 0.00007  |
| 213 | H3  | PX  | 0.00000  | 0.00000  | 0.00000  | 0.00000  | 0.00000  |
| 214 | H3  | PY  | 0.00000  | 0.00000  | 0.00000  | 0.00001  | 0.00000  |
| 215 | H3  | PZ  | 0.00000  | 0.00000  | 0.00000  | 0.00000  | 0.00000  |
| 216 | H5  | S   | 0.00002  | 0.00002  | 0.00000  | 0.00002  | -0.00001 |
| 217 | H5  | S   | -0.00003 | 0.00011  | -0.00001 | 0.00010  | 0.00000  |
| 218 | H5  | PX  | 0.00000  | 0.00000  | 0.00000  | 0.00000  | 0.00000  |
| 219 | H5  | PY  | 0.00000  | 0.00000  | 0.00000  | -0.00001 | 0.00000  |
| 220 | H5  | PZ  | 0.00000  | 0.00001  | 0.00000  | 0.00001  | 0.00000  |
| 221 | H7  | S   | 0.00002  | 0.00002  | 0.00000  | 0.00002  | -0.00001 |
| 222 | H7  | S   | -0.00003 | 0.00011  | -0.00001 | 0.00010  | 0.00000  |
| 223 | H7  | PX  | 0.00000  | 0.00000  | 0.00000  | 0.00000  | 0.00000  |
| 224 | H7  | PY  | 0.00000  | 0.00000  | 0.00000  | -0.00001 | 0.00000  |
| 225 | H7  | PZ  | 0.00000  | -0.00001 | 0.00000  | -0.00001 | 0.00000  |

MO:                                    11                                    12                                    13                                    14                                    15  
Eigenvalues:                        -11.23182    -11.22847    -1.43013    -1.27321    -1.13071  
(ev):                                    -305.63346   -305.54247   -38.91592   -34.64594   -30.76832

|   |    |   |         |          |          |          |         |
|---|----|---|---------|----------|----------|----------|---------|
|   |    |   | A       | A        | A        | A        | A       |
| 1 | H1 | S | 0.00004 | 0.00025  | -0.00620 | 0.00452  | 0.03571 |
| 2 | H1 | S | 0.00044 | -0.00209 | 0.00026  | -0.00754 | 0.00369 |

|    |    |     |          |          |          |          |          |
|----|----|-----|----------|----------|----------|----------|----------|
| 3  | H1 | PX  | 0.00000  | -0.00024 | 0.00118  | -0.00045 | -0.00376 |
| 4  | H1 | PY  | -0.00001 | -0.00011 | 0.00036  | -0.00001 | -0.00122 |
| 5  | H1 | PZ  | 0.00000  | 0.00000  | 0.00000  | 0.00000  | 0.00000  |
| 6  | C1 | S   | 0.01493  | -0.99466 | 0.01629  | -0.01587 | -0.09051 |
| 7  | C1 | S   | 0.00030  | -0.02771 | -0.02953 | 0.03274  | 0.17011  |
| 8  | C1 | PX  | 0.00004  | 0.00027  | 0.01457  | -0.00998 | -0.06321 |
| 9  | C1 | PY  | 0.00002  | 0.00013  | -0.01860 | -0.01397 | -0.00228 |
| 10 | C1 | PZ  | 0.00000  | 0.00000  | 0.00000  | 0.00000  | 0.00000  |
| 11 | C1 | S   | 0.00308  | 0.00839  | -0.02690 | -0.00274 | 0.09795  |
| 12 | C1 | PX  | -0.00160 | 0.00032  | 0.00492  | 0.01936  | -0.00169 |
| 13 | C1 | PY  | -0.00057 | 0.00105  | -0.01783 | -0.00115 | 0.00566  |
| 14 | C1 | PZ  | 0.00000  | 0.00000  | 0.00000  | 0.00000  | 0.00000  |
| 15 | C1 | DXX | -0.00007 | 0.00150  | 0.00002  | 0.00012  | 0.00462  |
| 16 | C1 | DYY | -0.00021 | 0.00163  | -0.00312 | 0.00256  | 0.00524  |
| 17 | C1 | DZZ | -0.00010 | 0.00249  | 0.00146  | -0.00087 | -0.00738 |
| 18 | C1 | DXY | -0.00004 | 0.00009  | 0.00393  | 0.00058  | -0.00291 |
| 19 | C1 | DXZ | 0.00000  | 0.00000  | 0.00000  | 0.00000  | 0.00000  |
| 20 | C1 | DYZ | 0.00000  | 0.00000  | 0.00000  | 0.00000  | 0.00000  |
| 21 | C2 | S   | 0.00031  | -0.00033 | 0.00256  | -0.02948 | -0.08909 |
| 22 | C2 | S   | 0.00012  | -0.00029 | -0.00706 | 0.05458  | 0.17204  |
| 23 | C2 | PX  | -0.00001 | 0.00005  | -0.00277 | 0.02450  | 0.04652  |
| 24 | C2 | PY  | 0.00003  | -0.00002 | -0.00338 | -0.01624 | 0.05474  |
| 25 | C2 | PZ  | 0.00000  | 0.00000  | 0.00000  | 0.00000  | 0.00000  |
| 26 | C2 | S   | -0.00244 | 0.00483  | 0.00008  | 0.03863  | 0.08974  |
| 27 | C2 | PX  | -0.00140 | 0.00247  | 0.01110  | 0.00772  | -0.01030 |
| 28 | C2 | PY  | -0.00106 | -0.00004 | -0.00488 | -0.01343 | -0.00243 |
| 29 | C2 | PZ  | 0.00000  | 0.00000  | 0.00000  | 0.00000  | 0.00000  |
| 30 | C2 | DXX | -0.00004 | 0.00008  | -0.00007 | 0.00156  | 0.00155  |
| 31 | C2 | DYY | 0.00003  | 0.00005  | -0.00005 | 0.00376  | 0.00721  |
| 32 | C2 | DZZ | 0.00003  | -0.00007 | -0.00031 | -0.00322 | -0.00693 |
| 33 | C2 | DXY | -0.00003 | 0.00000  | -0.00047 | -0.00380 | 0.00224  |
| 34 | C2 | DXZ | 0.00000  | 0.00000  | 0.00000  | 0.00000  | 0.00000  |
| 35 | C2 | DYZ | 0.00000  | 0.00000  | 0.00000  | 0.00000  | 0.00000  |
| 36 | C3 | S   | 0.11120  | 0.04025  | 0.00262  | -0.06081 | -0.06079 |
| 37 | C3 | S   | 0.00351  | 0.00113  | -0.00583 | 0.11327  | 0.11797  |
| 38 | C3 | PX  | 0.00001  | 0.00004  | 0.00150  | -0.02790 | -0.01432 |
| 39 | C3 | PY  | -0.00020 | 0.00001  | -0.00420 | -0.04467 | 0.05041  |
| 40 | C3 | PZ  | 0.00000  | 0.00000  | 0.00000  | 0.00000  | 0.00000  |
| 41 | C3 | S   | -0.00954 | -0.00620 | -0.01975 | 0.05279  | 0.06226  |
| 42 | C3 | PX  | 0.00027  | -0.00058 | -0.01921 | -0.01945 | 0.00744  |
| 43 | C3 | PY  | 0.00106  | 0.00426  | 0.01976  | 0.00554  | 0.01982  |
| 44 | C3 | PZ  | 0.00000  | 0.00000  | 0.00000  | 0.00000  | 0.00000  |
| 45 | C3 | DXX | 0.00009  | 0.00021  | 0.00003  | 0.00621  | 0.00201  |
| 46 | C3 | DYY | 0.00034  | 0.00062  | -0.00099 | 0.00544  | 0.00821  |
| 47 | C3 | DZZ | -0.00013 | 0.00005  | 0.00004  | -0.00594 | -0.00520 |
| 48 | C3 | DXY | 0.00003  | 0.00010  | 0.00034  | 0.00283  | 0.00006  |
| 49 | C3 | DXZ | 0.00000  | 0.00000  | 0.00000  | 0.00000  | 0.00000  |
| 50 | C3 | DYZ | 0.00000  | 0.00000  | 0.00000  | 0.00000  | 0.00000  |
| 51 | C4 | S   | -0.00010 | 0.00979  | 0.07671  | -0.00875 | -0.09414 |
| 52 | C4 | S   | 0.00013  | 0.00030  | -0.14337 | 0.01608  | 0.18693  |
| 53 | C4 | PX  | -0.00002 | 0.00016  | -0.01128 | -0.00036 | -0.01194 |
| 54 | C4 | PY  | 0.00001  | -0.00012 | -0.10579 | -0.01437 | -0.08564 |
| 55 | C4 | PZ  | 0.00000  | 0.00000  | 0.00000  | 0.00000  | 0.00000  |
| 56 | C4 | S   | -0.00204 | -0.00203 | -0.00534 | 0.03740  | 0.10198  |

|     |    |     |          |          |          |          |          |
|-----|----|-----|----------|----------|----------|----------|----------|
| 57  | C4 | PX  | -0.00040 | -0.00140 | 0.01211  | 0.00012  | 0.00151  |
| 58  | C4 | PY  | 0.00162  | -0.00055 | 0.03856  | -0.01100 | -0.03074 |
| 59  | C4 | PZ  | 0.00000  | 0.00000  | 0.00000  | 0.00000  | 0.00000  |
| 60  | C4 | DXX | 0.00003  | 0.00039  | 0.00849  | 0.00163  | 0.01181  |
| 61  | C4 | DYY | 0.00000  | 0.00039  | -0.02244 | 0.00001  | -0.00152 |
| 62  | C4 | DZZ | 0.00004  | 0.00000  | 0.01138  | -0.00082 | -0.00812 |
| 63  | C4 | DXY | 0.00002  | -0.00005 | -0.00331 | -0.00037 | -0.00328 |
| 64  | C4 | DXZ | 0.00000  | 0.00000  | 0.00000  | 0.00000  | 0.00000  |
| 65  | C4 | DYZ | 0.00000  | 0.00000  | 0.00000  | 0.00000  | 0.00000  |
| 66  | C5 | S   | 0.00004  | -0.00133 | 0.01436  | -0.01301 | -0.10698 |
| 67  | C5 | S   | -0.00005 | 0.00027  | -0.02680 | 0.02757  | 0.20249  |
| 68  | C5 | PX  | 0.00000  | 0.00008  | -0.01793 | 0.00457  | 0.03794  |
| 69  | C5 | PY  | -0.00001 | 0.00000  | -0.01060 | -0.01386 | -0.05080 |
| 70  | C5 | PZ  | 0.00000  | 0.00000  | 0.00000  | 0.00000  | 0.00000  |
| 71  | C5 | S   | 0.00202  | -0.00240 | -0.00784 | 0.00593  | 0.15158  |
| 72  | C5 | PX  | 0.00032  | -0.00137 | -0.00575 | -0.01547 | 0.01217  |
| 73  | C5 | PY  | -0.00118 | 0.00156  | -0.01311 | 0.00578  | -0.01329 |
| 74  | C5 | PZ  | 0.00000  | 0.00000  | 0.00000  | 0.00000  | 0.00000  |
| 75  | C5 | DXX | -0.00001 | -0.00012 | -0.00409 | -0.00003 | 0.00572  |
| 76  | C5 | DYY | 0.00000  | -0.00004 | -0.00071 | 0.00136  | 0.00726  |
| 77  | C5 | DZZ | -0.00001 | 0.00009  | 0.00146  | -0.00051 | -0.00943 |
| 78  | C5 | DXY | -0.00001 | 0.00001  | -0.00365 | 0.00022  | 0.00413  |
| 79  | C5 | DXZ | 0.00000  | 0.00000  | 0.00000  | 0.00000  | 0.00000  |
| 80  | C5 | DYZ | 0.00000  | 0.00000  | 0.00000  | 0.00000  | 0.00000  |
| 81  | C6 | S   | -0.00267 | -0.00050 | 0.00171  | -0.11298 | -0.02907 |
| 82  | C6 | S   | -0.00013 | 0.00015  | -0.00276 | 0.21798  | 0.05602  |
| 83  | C6 | PX  | -0.00004 | -0.00001 | -0.00060 | 0.02423  | -0.00469 |
| 84  | C6 | PY  | 0.00001  | 0.00014  | -0.00137 | -0.10599 | 0.10320  |
| 85  | C6 | PZ  | 0.00000  | 0.00000  | 0.00000  | 0.00000  | 0.00000  |
| 86  | C6 | S   | 0.00150  | 0.00047  | -0.01626 | 0.04154  | 0.05675  |
| 87  | C6 | PX  | 0.00097  | 0.00268  | 0.00330  | 0.00929  | 0.00983  |
| 88  | C6 | PY  | 0.00274  | -0.00412 | -0.00979 | 0.02919  | 0.03149  |
| 89  | C6 | PZ  | 0.00000  | 0.00000  | 0.00000  | 0.00000  | 0.00000  |
| 90  | C6 | DXX | -0.00024 | -0.00004 | -0.00030 | -0.00093 | 0.00938  |
| 91  | C6 | DYY | -0.00012 | -0.00003 | -0.00066 | 0.01852  | -0.00252 |
| 92  | C6 | DZZ | -0.00007 | 0.00004  | 0.00020  | -0.01225 | -0.00267 |
| 93  | C6 | DXY | 0.00001  | 0.00000  | -0.00006 | -0.00149 | -0.00214 |
| 94  | C6 | DXZ | 0.00000  | 0.00000  | 0.00000  | 0.00000  | 0.00000  |
| 95  | C6 | DYZ | 0.00000  | 0.00000  | 0.00000  | 0.00000  | 0.00000  |
| 96  | C7 | S   | -0.98929 | -0.01065 | 0.00025  | -0.05284 | -0.00585 |
| 97  | C7 | S   | -0.02771 | -0.00053 | -0.00260 | 0.09704  | 0.00965  |
| 98  | C7 | PX  | 0.00026  | 0.00004  | 0.00025  | -0.05402 | 0.00238  |
| 99  | C7 | PY  | -0.00001 | 0.00008  | 0.00009  | 0.00090  | 0.03699  |
| 100 | C7 | PZ  | 0.00000  | 0.00000  | 0.00000  | 0.00000  | 0.00000  |
| 101 | C7 | S   | 0.01463  | 0.00635  | 0.03172  | 0.06360  | 0.02502  |
| 102 | C7 | PX  | -0.00326 | -0.00311 | -0.01214 | -0.01692 | -0.01040 |
| 103 | C7 | PY  | 0.00031  | 0.00055  | 0.00919  | 0.01369  | -0.00322 |
| 104 | C7 | PZ  | 0.00000  | 0.00000  | 0.00000  | 0.00000  | 0.00000  |
| 105 | C7 | DXX | 0.00121  | -0.00007 | 0.00014  | 0.00522  | -0.00156 |
| 106 | C7 | DYY | 0.00169  | -0.00002 | 0.00045  | 0.00391  | 0.00025  |
| 107 | C7 | DZZ | 0.00232  | -0.00004 | -0.00033 | -0.00547 | -0.00026 |
| 108 | C7 | DXY | 0.00024  | 0.00007  | -0.00012 | 0.00088  | -0.00416 |
| 109 | C7 | DXZ | 0.00000  | 0.00000  | 0.00000  | 0.00000  | 0.00000  |
| 110 | C7 | DYZ | 0.00000  | 0.00000  | 0.00000  | 0.00000  | 0.00000  |

|     |    |     |          |          |          |          |          |
|-----|----|-----|----------|----------|----------|----------|----------|
| 111 | O1 | S   | 0.00001  | -0.00005 | 0.19869  | 0.00610  | 0.03367  |
| 112 | O1 | S   | 0.00007  | -0.00013 | -0.43672 | -0.01326 | -0.07932 |
| 113 | O1 | PX  | -0.00001 | -0.00001 | -0.05646 | -0.00299 | -0.04093 |
| 114 | O1 | PY  | -0.00001 | 0.00001  | 0.05701  | -0.00238 | -0.06206 |
| 115 | O1 | PZ  | 0.00000  | 0.00000  | 0.00000  | 0.00000  | 0.00000  |
| 116 | O1 | S   | -0.00060 | 0.00126  | -0.45294 | -0.01548 | -0.07702 |
| 117 | O1 | PX  | 0.00007  | 0.00023  | -0.03808 | -0.00205 | -0.02420 |
| 118 | O1 | PY  | 0.00012  | -0.00008 | 0.04337  | 0.00032  | -0.03702 |
| 119 | O1 | PZ  | 0.00000  | 0.00000  | 0.00000  | 0.00000  | 0.00000  |
| 120 | O1 | DXX | 0.00004  | -0.00012 | -0.00896 | -0.00038 | -0.00789 |
| 121 | O1 | DYY | 0.00005  | -0.00026 | -0.01538 | -0.00006 | 0.00450  |
| 122 | O1 | DZZ | 0.00003  | -0.00007 | 0.00485  | 0.00019  | -0.00161 |
| 123 | O1 | DXY | -0.00001 | 0.00005  | -0.00400 | -0.00025 | -0.00312 |
| 124 | O1 | DXZ | 0.00000  | 0.00000  | 0.00000  | 0.00000  | 0.00000  |
| 125 | O1 | DYZ | 0.00000  | 0.00000  | 0.00000  | 0.00000  | 0.00000  |
| 126 | H4 | S   | 0.00002  | -0.00009 | -0.00615 | 0.00287  | 0.04607  |
| 127 | H4 | S   | 0.00020  | -0.00069 | -0.00063 | -0.00699 | 0.00907  |
| 128 | H4 | PX  | 0.00000  | -0.00001 | -0.00097 | 0.00033  | 0.00345  |
| 129 | H4 | PY  | 0.00002  | -0.00003 | 0.00046  | -0.00018 | -0.00369 |
| 130 | H4 | PZ  | 0.00000  | 0.00000  | 0.00000  | 0.00000  | 0.00000  |
| 131 | N1 | S   | -0.00008 | 0.00006  | 0.00049  | -0.14549 | 0.05153  |
| 132 | N1 | S   | -0.00023 | 0.00021  | -0.00168 | 0.28830  | -0.10701 |
| 133 | N1 | PX  | 0.00001  | 0.00002  | -0.00032 | 0.08535  | -0.04046 |
| 134 | N1 | PY  | -0.00003 | -0.00006 | -0.00059 | 0.08472  | 0.00234  |
| 135 | N1 | PZ  | 0.00000  | 0.00000  | 0.00000  | 0.00000  | 0.00000  |
| 136 | N1 | S   | 0.00327  | -0.00292 | 0.00139  | 0.33063  | -0.10288 |
| 137 | N1 | PX  | 0.00044  | -0.00049 | 0.00147  | 0.05264  | -0.02143 |
| 138 | N1 | PY  | 0.00095  | -0.00055 | 0.00072  | 0.03942  | 0.00698  |
| 139 | N1 | PZ  | 0.00000  | 0.00000  | 0.00000  | 0.00000  | 0.00000  |
| 140 | N1 | DXX | -0.00022 | 0.00013  | -0.00005 | 0.00447  | -0.00525 |
| 141 | N1 | DYY | -0.00011 | 0.00008  | -0.00005 | 0.00748  | -0.00007 |
| 142 | N1 | DZZ | -0.00015 | 0.00010  | -0.00022 | -0.01361 | 0.00365  |
| 143 | N1 | DXY | -0.00001 | -0.00002 | -0.00001 | 0.00218  | 0.00139  |
| 144 | N1 | DXZ | 0.00000  | 0.00000  | 0.00000  | 0.00000  | 0.00000  |
| 145 | N1 | DYZ | 0.00000  | 0.00000  | 0.00000  | 0.00000  | 0.00000  |
| 146 | H6 | S   | -0.00005 | 0.00000  | -0.00002 | 0.01078  | 0.03504  |
| 147 | H6 | S   | -0.00043 | 0.00055  | 0.00450  | 0.00123  | -0.00140 |
| 148 | H6 | PX  | 0.00001  | -0.00003 | 0.00003  | 0.00127  | 0.00362  |
| 149 | H6 | PY  | 0.00002  | 0.00001  | 0.00018  | 0.00060  | 0.00163  |
| 150 | H6 | PZ  | 0.00000  | 0.00000  | 0.00000  | 0.00000  | 0.00000  |
| 151 | C8 | S   | 0.01523  | 0.00019  | 0.00037  | -0.08657 | 0.04650  |
| 152 | C8 | S   | 0.00033  | 0.00018  | -0.00010 | 0.16516  | -0.09069 |
| 153 | C8 | PX  | 0.00006  | -0.00007 | 0.00006  | -0.06111 | 0.03221  |
| 154 | C8 | PY  | 0.00006  | 0.00003  | -0.00020 | 0.05161  | 0.00531  |
| 155 | C8 | PZ  | 0.00000  | 0.00000  | 0.00000  | 0.00000  | 0.00000  |
| 156 | C8 | S   | -0.00503 | -0.00176 | -0.00653 | 0.04241  | -0.05469 |
| 157 | C8 | PX  | -0.00077 | -0.00095 | 0.00048  | 0.02983  | -0.01517 |
| 158 | C8 | PY  | -0.00239 | -0.00232 | -0.00929 | 0.00402  | -0.00435 |
| 159 | C8 | PZ  | 0.00000  | 0.00000  | 0.00000  | 0.00000  | 0.00000  |
| 160 | C8 | DXX | 0.00033  | 0.00003  | -0.00015 | 0.01251  | -0.00509 |
| 161 | C8 | DYY | 0.00057  | 0.00002  | -0.00020 | 0.00756  | -0.00204 |
| 162 | C8 | DZZ | 0.00011  | 0.00006  | 0.00013  | -0.00981 | 0.00444  |
| 163 | C8 | DXY | 0.00018  | -0.00004 | -0.00006 | -0.00913 | 0.00457  |
| 164 | C8 | DXZ | 0.00000  | 0.00000  | 0.00000  | 0.00000  | 0.00000  |

|     |     |     |          |          |          |          |          |
|-----|-----|-----|----------|----------|----------|----------|----------|
| 165 | C8  | DYZ | 0.00000  | 0.00000  | 0.00000  | 0.00000  | 0.00000  |
| 166 | H8  | S   | 0.00049  | 0.00007  | -0.00026 | 0.01424  | 0.00347  |
| 167 | H8  | S   | -0.00110 | 0.00077  | 0.00245  | 0.00462  | 0.00370  |
| 168 | H8  | PX  | -0.00036 | -0.00003 | 0.00009  | -0.00138 | -0.00046 |
| 169 | H8  | PY  | 0.00000  | 0.00001  | -0.00017 | -0.00018 | 0.00056  |
| 170 | H8  | PZ  | 0.00000  | 0.00000  | 0.00000  | 0.00000  | 0.00000  |
| 171 | C10 | S   | -0.00143 | -0.00002 | 0.00003  | -0.02468 | 0.02710  |
| 172 | C10 | S   | 0.00003  | 0.00000  | -0.00018 | 0.04663  | -0.05226 |
| 173 | C10 | PX  | 0.00006  | -0.00003 | -0.00009 | -0.01004 | 0.00901  |
| 174 | C10 | PY  | -0.00002 | -0.00004 | -0.00026 | 0.02935  | -0.02506 |
| 175 | C10 | PZ  | 0.00000  | 0.00000  | 0.00000  | 0.00000  | 0.00000  |
| 176 | C10 | S   | -0.00028 | -0.00098 | -0.00477 | 0.03307  | -0.03464 |
| 177 | C10 | PX  | -0.00002 | 0.00079  | 0.00194  | -0.01486 | 0.00625  |
| 178 | C10 | PY  | -0.00018 | -0.00022 | -0.00076 | 0.00286  | 0.00008  |
| 179 | C10 | PZ  | 0.00000  | 0.00000  | 0.00000  | 0.00000  | 0.00000  |
| 180 | C10 | DXX | -0.00006 | -0.00002 | -0.00007 | -0.00126 | 0.00081  |
| 181 | C10 | DYY | -0.00013 | -0.00001 | 0.00001  | 0.00197  | -0.00249 |
| 182 | C10 | DZZ | 0.00005  | -0.00001 | -0.00005 | -0.00183 | 0.00207  |
| 183 | C10 | DXY | 0.00006  | 0.00003  | -0.00001 | -0.00274 | 0.00181  |
| 184 | C10 | DXZ | 0.00000  | 0.00000  | 0.00000  | 0.00000  | 0.00000  |
| 185 | C10 | DYZ | 0.00000  | 0.00000  | 0.00000  | 0.00000  | 0.00000  |
| 186 | H16 | S   | 0.00006  | -0.00005 | -0.00016 | 0.00850  | -0.01175 |
| 187 | H16 | S   | 0.00001  | -0.00027 | -0.00027 | 0.00476  | -0.00310 |
| 188 | H16 | PX  | -0.00002 | 0.00000  | -0.00003 | -0.00078 | 0.00114  |
| 189 | H16 | PY  | 0.00002  | 0.00000  | -0.00002 | 0.00028  | -0.00063 |
| 190 | H16 | PZ  | 0.00000  | 0.00000  | 0.00000  | 0.00000  | 0.00000  |
| 191 | H18 | S   | -0.00002 | 0.00008  | 0.00017  | 0.00916  | -0.01342 |
| 192 | H18 | S   | -0.00014 | 0.00023  | 0.00102  | -0.00391 | 0.00033  |
| 193 | H18 | PX  | 0.00001  | 0.00000  | 0.00003  | 0.00107  | -0.00102 |
| 194 | H18 | PY  | -0.00001 | 0.00000  | 0.00003  | 0.00109  | -0.00138 |
| 195 | H18 | PZ  | 0.00000  | 0.00000  | 0.00000  | 0.00000  | 0.00000  |
| 196 | C9  | S   | 0.00000  | -0.00003 | 0.06057  | 0.00287  | 0.03593  |
| 197 | C9  | S   | -0.00001 | 0.00002  | -0.11069 | -0.00537 | -0.06957 |
| 198 | C9  | PX  | 0.00000  | 0.00003  | 0.07509  | 0.00328  | 0.03080  |
| 199 | C9  | PY  | 0.00001  | -0.00001 | 0.04254  | 0.00138  | 0.00749  |
| 200 | C9  | PZ  | 0.00000  | 0.00000  | 0.00000  | 0.00000  | 0.00000  |
| 201 | C9  | S   | 0.00004  | -0.00022 | -0.02784 | -0.00226 | -0.03599 |
| 202 | C9  | PX  | 0.00004  | 0.00017  | -0.00235 | 0.00007  | -0.00330 |
| 203 | C9  | PY  | -0.00004 | 0.00017  | -0.00033 | -0.00076 | 0.00027  |
| 204 | C9  | PZ  | 0.00000  | 0.00000  | 0.00000  | 0.00000  | 0.00000  |
| 205 | C9  | DXX | -0.00001 | -0.00001 | -0.01393 | -0.00062 | -0.00515 |
| 206 | C9  | DYY | 0.00000  | 0.00001  | 0.00142  | 0.00009  | 0.00097  |
| 207 | C9  | DZZ | 0.00000  | 0.00002  | 0.00915  | 0.00038  | 0.00296  |
| 208 | C9  | DXY | 0.00000  | -0.00002 | -0.01446 | -0.00049 | -0.00386 |
| 209 | C9  | DXZ | 0.00000  | 0.00000  | 0.00000  | 0.00000  | 0.00000  |
| 210 | C9  | DYZ | 0.00000  | 0.00000  | 0.00000  | 0.00000  | 0.00000  |
| 211 | H3  | S   | 0.00000  | 0.00000  | -0.02125 | -0.00125 | -0.02164 |
| 212 | H3  | S   | 0.00002  | -0.00005 | -0.00603 | 0.00011  | -0.00638 |
| 213 | H3  | PX  | 0.00000  | -0.00001 | 0.00019  | -0.00001 | -0.00031 |
| 214 | H3  | PY  | 0.00000  | 0.00000  | 0.00400  | 0.00017  | 0.00229  |
| 215 | H3  | PZ  | 0.00000  | 0.00000  | 0.00000  | 0.00000  | 0.00000  |
| 216 | H5  | S   | 0.00000  | 0.00004  | -0.02188 | -0.00118 | -0.01661 |
| 217 | H5  | S   | -0.00004 | -0.00001 | -0.00422 | 0.00004  | -0.00287 |
| 218 | H5  | PX  | 0.00000  | 0.00000  | 0.00241  | 0.00011  | 0.00152  |

|     |    |    |          |          |          |          |          |
|-----|----|----|----------|----------|----------|----------|----------|
| 219 | H5 | PY | 0.00000  | -0.00002 | -0.00055 | -0.00003 | -0.00060 |
| 220 | H5 | PZ | 0.00000  | 0.00000  | -0.00304 | -0.00013 | -0.00166 |
| 221 | H7 | S  | 0.00000  | 0.00004  | -0.02188 | -0.00118 | -0.01661 |
| 222 | H7 | S  | -0.00004 | -0.00001 | -0.00422 | 0.00004  | -0.00287 |
| 223 | H7 | PX | 0.00000  | 0.00000  | 0.00241  | 0.00011  | 0.00152  |
| 224 | H7 | PY | 0.00000  | -0.00002 | -0.00055 | -0.00003 | -0.00060 |
| 225 | H7 | PZ | 0.00000  | 0.00000  | 0.00304  | 0.00013  | 0.00166  |

|              |  |           |           |           |           |           |
|--------------|--|-----------|-----------|-----------|-----------|-----------|
| MO:          |  | 16        | 17        | 18        | 19        | 20        |
| Eigenvalues: |  | -1.06874  | -1.03349  | -1.00471  | -0.96765  | -0.89142  |
| (ev):        |  | -29.08200 | -28.12281 | -27.33952 | -26.33104 | -24.25674 |

|    |    | A   | A        | A        | A        | A        |          |
|----|----|-----|----------|----------|----------|----------|----------|
| 1  | H1 | S   | -0.04210 | 0.01786  | -0.04039 | -0.06499 | -0.00852 |
| 2  | H1 | S   | -0.01383 | 0.00887  | -0.00197 | -0.01493 | -0.00424 |
| 3  | H1 | PX  | 0.00398  | -0.00135 | 0.00444  | 0.00585  | 0.00065  |
| 4  | H1 | PY  | 0.00158  | -0.00071 | 0.00072  | 0.00116  | 0.00080  |
| 5  | H1 | PZ  | 0.00000  | 0.00000  | 0.00000  | 0.00000  | 0.00000  |
| 6  | C1 | S   | 0.07406  | -0.02515 | 0.07305  | 0.09554  | 0.01529  |
| 7  | C1 | S   | -0.13894 | 0.04709  | -0.14070 | -0.18394 | -0.03015 |
| 8  | C1 | PX  | 0.01375  | 0.01260  | 0.04749  | 0.03366  | -0.01256 |
| 9  | C1 | PY  | 0.03033  | -0.04594 | -0.06411 | -0.03314 | 0.05262  |
| 10 | C1 | PZ  | 0.00000  | 0.00000  | 0.00000  | 0.00000  | 0.00000  |
| 11 | C1 | S   | -0.10548 | 0.04857  | -0.07061 | -0.11440 | -0.02504 |
| 12 | C1 | PX  | 0.00868  | -0.00658 | -0.01914 | -0.01788 | 0.00119  |
| 13 | C1 | PY  | 0.00295  | -0.00908 | -0.01871 | -0.02534 | 0.01669  |
| 14 | C1 | PZ  | 0.00000  | 0.00000  | 0.00000  | 0.00000  | 0.00000  |
| 15 | C1 | DXX | -0.00087 | -0.00111 | -0.00387 | -0.00633 | 0.00248  |
| 16 | C1 | DYY | -0.00823 | 0.00563  | -0.00039 | -0.00062 | -0.00588 |
| 17 | C1 | DZZ | 0.00647  | -0.00258 | 0.00474  | 0.00678  | 0.00153  |
| 18 | C1 | DXY | 0.00069  | 0.00336  | 0.00638  | 0.00214  | -0.00466 |
| 19 | C1 | DXZ | 0.00000  | 0.00000  | 0.00000  | 0.00000  | 0.00000  |
| 20 | C1 | DYZ | 0.00000  | 0.00000  | 0.00000  | 0.00000  | 0.00000  |
| 21 | C2 | S   | -0.08246 | 0.02774  | -0.09790 | 0.00232  | 0.04365  |
| 22 | C2 | S   | 0.15676  | -0.05306 | 0.18836  | -0.00284 | -0.08880 |
| 23 | C2 | PX  | 0.02391  | 0.00966  | 0.02017  | -0.00768 | -0.04680 |
| 24 | C2 | PY  | 0.00839  | -0.06620 | 0.04172  | 0.01446  | 0.14008  |
| 25 | C2 | PZ  | 0.00000  | 0.00000  | 0.00000  | 0.00000  | 0.00000  |
| 26 | C2 | S   | 0.12242  | -0.03097 | 0.13035  | -0.02274 | -0.06017 |
| 27 | C2 | PX  | 0.00801  | 0.00359  | -0.00838 | -0.01270 | 0.00605  |
| 28 | C2 | PY  | 0.00275  | -0.01357 | 0.00664  | -0.00316 | 0.02929  |
| 29 | C2 | PZ  | 0.00000  | 0.00000  | 0.00000  | 0.00000  | 0.00000  |
| 30 | C2 | DXX | 0.00128  | 0.00307  | 0.00186  | -0.00083 | -0.00993 |
| 31 | C2 | DYY | 0.00842  | -0.00340 | 0.00601  | -0.00019 | 0.00270  |
| 32 | C2 | DZZ | -0.00691 | 0.00165  | -0.00767 | 0.00079  | 0.00380  |
| 33 | C2 | DXY | -0.00190 | -0.00558 | 0.00075  | 0.00087  | 0.01084  |
| 34 | C2 | DXZ | 0.00000  | 0.00000  | 0.00000  | 0.00000  | 0.00000  |
| 35 | C2 | DYZ | 0.00000  | 0.00000  | 0.00000  | 0.00000  | 0.00000  |
| 36 | C3 | S   | 0.10009  | -0.07534 | -0.03584 | -0.02340 | 0.03607  |
| 37 | C3 | S   | -0.19116 | 0.14579  | 0.06960  | 0.04539  | -0.07381 |
| 38 | C3 | PX  | -0.06446 | -0.01048 | 0.00687  | 0.02385  | 0.07246  |
| 39 | C3 | PY  | 0.02480  | -0.01744 | -0.08078 | -0.13091 | -0.05911 |
| 40 | C3 | PZ  | 0.00000  | 0.00000  | 0.00000  | 0.00000  | 0.00000  |
| 41 | C3 | S   | -0.13955 | 0.08624  | 0.04585  | 0.03588  | -0.04157 |



|    |    |     |          |          |          |          |          |
|----|----|-----|----------|----------|----------|----------|----------|
| 42 | C3 | PX  | -0.00474 | -0.00050 | 0.01066  | 0.01765  | 0.01209  |
| 43 | C3 | PY  | -0.00201 | 0.00225  | -0.03767 | -0.07364 | -0.01970 |
| 44 | C3 | PZ  | 0.00000  | 0.00000  | 0.00000  | 0.00000  | 0.00000  |
| 45 | C3 | DXX | 0.00319  | 0.00490  | 0.00389  | 0.00233  | -0.00786 |
| 46 | C3 | DYY | -0.01407 | 0.00479  | -0.00257 | -0.00365 | 0.00230  |
| 47 | C3 | DZZ | 0.00777  | -0.00603 | -0.00234 | -0.00109 | 0.00267  |
| 48 | C3 | DXY | 0.00606  | 0.00143  | -0.00489 | -0.00611 | -0.00516 |
| 49 | C3 | DXZ | 0.00000  | 0.00000  | 0.00000  | 0.00000  | 0.00000  |
| 50 | C3 | DYZ | 0.00000  | 0.00000  | 0.00000  | 0.00000  | 0.00000  |
| 51 | C4 | S   | 0.01915  | 0.04241  | 0.09287  | 0.01058  | -0.04032 |
| 52 | C4 | S   | -0.03924 | -0.08424 | -0.18426 | -0.02082 | 0.08445  |
| 53 | C4 | PX  | -0.06425 | 0.05901  | -0.06431 | -0.11439 | -0.08331 |
| 54 | C4 | PY  | 0.02846  | -0.01373 | -0.00175 | 0.14497  | -0.05958 |
| 55 | C4 | PZ  | 0.00000  | 0.00000  | 0.00000  | 0.00000  | 0.00000  |
| 56 | C4 | S   | -0.01231 | -0.05705 | -0.14550 | -0.04625 | 0.07676  |
| 57 | C4 | PX  | -0.00858 | 0.00443  | -0.01657 | -0.00839 | -0.02950 |
| 58 | C4 | PY  | -0.00505 | 0.02019  | 0.03417  | 0.02762  | -0.02442 |
| 59 | C4 | PZ  | 0.00000  | 0.00000  | 0.00000  | 0.00000  | 0.00000  |
| 60 | C4 | DXX | 0.00149  | -0.00505 | -0.00060 | -0.00740 | 0.01418  |
| 61 | C4 | DYY | -0.00035 | -0.00171 | -0.00758 | 0.01285  | -0.01064 |
| 62 | C4 | DZZ | 0.00092  | 0.00469  | 0.00873  | -0.00205 | -0.00220 |
| 63 | C4 | DXY | 0.00628  | -0.00210 | 0.00988  | 0.00503  | 0.00403  |
| 64 | C4 | DXZ | 0.00000  | 0.00000  | 0.00000  | 0.00000  | 0.00000  |
| 65 | C4 | DYZ | 0.00000  | 0.00000  | 0.00000  | 0.00000  | 0.00000  |
| 66 | C5 | S   | -0.05449 | 0.07105  | -0.04742 | -0.02129 | -0.09399 |
| 67 | C5 | S   | 0.10618  | -0.13717 | 0.08843  | 0.04100  | 0.18596  |
| 68 | C5 | PX  | -0.02075 | -0.01317 | -0.07005 | -0.00444 | 0.01754  |
| 69 | C5 | PY  | -0.04882 | 0.00589  | -0.09736 | 0.02996  | 0.05515  |
| 70 | C5 | PZ  | 0.00000  | 0.00000  | 0.00000  | 0.00000  | 0.00000  |
| 71 | C5 | S   | 0.06178  | -0.10294 | 0.07806  | 0.06084  | 0.14998  |
| 72 | C5 | PX  | -0.00868 | -0.00217 | -0.00144 | 0.00623  | -0.01152 |
| 73 | C5 | PY  | 0.00568  | -0.00409 | -0.01902 | -0.00023 | 0.02319  |
| 74 | C5 | PZ  | 0.00000  | 0.00000  | 0.00000  | 0.00000  | 0.00000  |
| 75 | C5 | DXX | -0.00295 | -0.00383 | -0.00947 | 0.00045  | 0.00858  |
| 76 | C5 | DYY | 0.00677  | -0.00387 | 0.01009  | 0.00201  | -0.00020 |
| 77 | C5 | DZZ | -0.00374 | 0.00580  | -0.00339 | -0.00188 | -0.00720 |
| 78 | C5 | DXY | 0.00138  | -0.00328 | -0.00065 | 0.00205  | 0.00149  |
| 79 | C5 | DXZ | 0.00000  | 0.00000  | 0.00000  | 0.00000  | 0.00000  |
| 80 | C5 | DYZ | 0.00000  | 0.00000  | 0.00000  | 0.00000  | 0.00000  |
| 81 | C6 | S   | -0.05846 | -0.05665 | -0.01611 | 0.00017  | 0.08238  |
| 82 | C6 | S   | 0.11672  | 0.11208  | 0.03037  | -0.00213 | -0.16801 |
| 83 | C6 | PX  | -0.10105 | 0.04247  | -0.00888 | 0.03609  | 0.04351  |
| 84 | C6 | PY  | -0.05468 | -0.02278 | 0.12031  | 0.00382  | -0.10466 |
| 85 | C6 | PZ  | 0.00000  | 0.00000  | 0.00000  | 0.00000  | 0.00000  |
| 86 | C6 | S   | 0.05427  | 0.07607  | 0.04038  | 0.00952  | -0.15586 |
| 87 | C6 | PX  | -0.00989 | 0.02773  | -0.00307 | 0.00614  | 0.00376  |
| 88 | C6 | PY  | 0.01425  | 0.00081  | 0.03840  | 0.01213  | -0.04409 |
| 89 | C6 | PZ  | 0.00000  | 0.00000  | 0.00000  | 0.00000  | 0.00000  |
| 90 | C6 | DXX | -0.00950 | 0.00538  | 0.01190  | 0.00519  | -0.00949 |
| 91 | C6 | DYY | 0.01352  | 0.00131  | -0.00637 | -0.00347 | 0.00187  |
| 92 | C6 | DZZ | -0.00549 | -0.00541 | -0.00112 | -0.00019 | 0.00574  |
| 93 | C6 | DXY | -0.00533 | 0.00539  | -0.00673 | -0.00106 | -0.00014 |
| 94 | C6 | DXZ | 0.00000  | 0.00000  | 0.00000  | 0.00000  | 0.00000  |
| 95 | C6 | DYZ | 0.00000  | 0.00000  | 0.00000  | 0.00000  | 0.00000  |

|     |    |     |          |          |          |          |          |
|-----|----|-----|----------|----------|----------|----------|----------|
| 96  | C7 | S   | 0.10899  | -0.01574 | -0.06771 | -0.07718 | -0.04742 |
| 97  | C7 | S   | -0.20858 | 0.02800  | 0.12946  | 0.15018  | 0.09490  |
| 98  | C7 | PX  | 0.04975  | -0.01677 | -0.02469 | -0.03633 | -0.01753 |
| 99  | C7 | PY  | -0.03090 | 0.08636  | 0.01157  | 0.02668  | -0.02715 |
| 100 | C7 | PZ  | 0.00000  | 0.00000  | 0.00000  | 0.00000  | 0.00000  |
| 101 | C7 | S   | -0.14186 | 0.04091  | 0.07915  | 0.07371  | 0.06056  |
| 102 | C7 | PX  | -0.00078 | -0.00750 | 0.00987  | 0.02125  | 0.00901  |
| 103 | C7 | PY  | -0.00169 | 0.01019  | -0.00508 | -0.00640 | -0.00450 |
| 104 | C7 | PZ  | 0.00000  | 0.00000  | 0.00000  | 0.00000  | 0.00000  |
| 105 | C7 | DXX | -0.00351 | 0.00044  | 0.00293  | 0.00501  | 0.00471  |
| 106 | C7 | DYY | -0.00810 | -0.00168 | 0.00368  | 0.00166  | 0.00027  |
| 107 | C7 | DZZ | 0.00854  | -0.00113 | -0.00535 | -0.00583 | -0.00360 |
| 108 | C7 | DXY | 0.00232  | -0.00946 | -0.00242 | -0.00366 | 0.00391  |
| 109 | C7 | DXZ | 0.00000  | 0.00000  | 0.00000  | 0.00000  | 0.00000  |
| 110 | C7 | DYZ | 0.00000  | 0.00000  | 0.00000  | 0.00000  | 0.00000  |
| 111 | O1 | S   | -0.00797 | -0.00234 | -0.00686 | -0.04673 | 0.04112  |
| 112 | O1 | S   | 0.01796  | 0.00772  | 0.01881  | 0.10638  | -0.09460 |
| 113 | O1 | PX  | -0.00868 | 0.05693  | 0.07601  | -0.13342 | 0.02023  |
| 114 | O1 | PY  | 0.01052  | 0.06591  | 0.14423  | -0.09973 | 0.00248  |
| 115 | O1 | PZ  | 0.00000  | 0.00000  | 0.00000  | 0.00000  | 0.00000  |
| 116 | O1 | S   | 0.02469  | -0.00402 | 0.00769  | 0.14318  | -0.13116 |
| 117 | O1 | PX  | -0.00243 | 0.03086  | 0.04507  | -0.07107 | 0.01175  |
| 118 | O1 | PY  | 0.00579  | 0.03772  | 0.07919  | -0.05112 | -0.00212 |
| 119 | O1 | PZ  | 0.00000  | 0.00000  | 0.00000  | 0.00000  | 0.00000  |
| 120 | O1 | DXX | 0.00035  | 0.00729  | 0.01271  | -0.01248 | 0.00306  |
| 121 | O1 | DYY | -0.00086 | -0.00486 | -0.01019 | 0.00779  | 0.00021  |
| 122 | O1 | DZZ | 0.00042  | 0.00066  | 0.00150  | 0.00184  | -0.00141 |
| 123 | O1 | DXY | 0.00173  | 0.00153  | 0.00728  | -0.00076 | 0.00214  |
| 124 | O1 | DXZ | 0.00000  | 0.00000  | 0.00000  | 0.00000  | 0.00000  |
| 125 | O1 | DYZ | 0.00000  | 0.00000  | 0.00000  | 0.00000  | 0.00000  |
| 126 | H4 | S   | 0.02906  | -0.04457 | 0.02521  | 0.02729  | 0.08672  |
| 127 | H4 | S   | 0.00241  | -0.00994 | 0.01067  | 0.01194  | 0.02585  |
| 128 | H4 | PX  | 0.00183  | -0.00322 | 0.00083  | 0.00224  | 0.00532  |
| 129 | H4 | PY  | -0.00252 | 0.00303  | -0.00309 | -0.00097 | -0.00524 |
| 130 | H4 | PZ  | 0.00000  | 0.00000  | 0.00000  | 0.00000  | 0.00000  |
| 131 | N1 | S   | -0.06702 | -0.00328 | 0.06555  | 0.02414  | -0.03575 |
| 132 | N1 | S   | 0.13832  | 0.00596  | -0.13818 | -0.05106 | 0.07607  |
| 133 | N1 | PX  | -0.02349 | -0.03238 | -0.01885 | 0.00495  | 0.07469  |
| 134 | N1 | PY  | 0.07420  | 0.08935  | -0.02218 | 0.01545  | -0.05274 |
| 135 | N1 | PZ  | 0.00000  | 0.00000  | 0.00000  | 0.00000  | 0.00000  |
| 136 | N1 | S   | 0.16746  | 0.00156  | -0.14612 | -0.06134 | 0.08604  |
| 137 | N1 | PX  | 0.00039  | -0.01893 | -0.01302 | -0.00285 | 0.03419  |
| 138 | N1 | PY  | 0.03087  | 0.03535  | -0.00426 | 0.00495  | -0.02637 |
| 139 | N1 | PZ  | 0.00000  | 0.00000  | 0.00000  | 0.00000  | 0.00000  |
| 140 | N1 | DXX | -0.00761 | -0.00893 | -0.00016 | 0.00055  | 0.01050  |
| 141 | N1 | DYY | 0.00750  | 0.00658  | -0.00235 | -0.00059 | -0.00728 |
| 142 | N1 | DZZ | -0.00315 | -0.00020 | 0.00329  | 0.00064  | -0.00290 |
| 143 | N1 | DXY | 0.00098  | 0.00835  | -0.00050 | 0.00364  | -0.00058 |
| 144 | N1 | DXZ | 0.00000  | 0.00000  | 0.00000  | 0.00000  | 0.00000  |
| 145 | N1 | DYZ | 0.00000  | 0.00000  | 0.00000  | 0.00000  | 0.00000  |
| 146 | H6 | S   | 0.04633  | -0.01489 | 0.05690  | -0.00062 | -0.03520 |
| 147 | H6 | S   | 0.01240  | -0.00417 | 0.01188  | -0.00387 | -0.00777 |
| 148 | H6 | PX  | 0.00469  | -0.00134 | 0.00534  | -0.00021 | -0.00326 |
| 149 | H6 | PY  | 0.00139  | -0.00115 | 0.00226  | 0.00024  | 0.00074  |

|     |     |     |          |          |          |          |          |
|-----|-----|-----|----------|----------|----------|----------|----------|
| 150 | H6  | PZ  | 0.00000  | 0.00000  | 0.00000  | 0.00000  | 0.00000  |
| 151 | C8  | S   | 0.05973  | 0.10478  | -0.01926 | 0.01109  | -0.02550 |
| 152 | C8  | S   | -0.11672 | -0.20539 | 0.03641  | -0.02222 | 0.05363  |
| 153 | C8  | PX  | -0.07948 | -0.01887 | 0.08573  | 0.04075  | -0.04871 |
| 154 | C8  | PY  | 0.00525  | 0.12952  | -0.01034 | 0.09575  | 0.13389  |
| 155 | C8  | PZ  | 0.00000  | 0.00000  | 0.00000  | 0.00000  | 0.00000  |
| 156 | C8  | S   | -0.08468 | -0.13950 | 0.03957  | -0.00105 | 0.03907  |
| 157 | C8  | PX  | -0.00881 | -0.01790 | 0.00793  | 0.00678  | 0.00446  |
| 158 | C8  | PY  | -0.01597 | 0.00308  | 0.01253  | 0.03017  | 0.03801  |
| 159 | C8  | PZ  | 0.00000  | 0.00000  | 0.00000  | 0.00000  | 0.00000  |
| 160 | C8  | DXX | 0.00492  | 0.00294  | -0.00696 | 0.00099  | 0.01245  |
| 161 | C8  | DYY | -0.01086 | -0.00793 | 0.00722  | 0.00223  | -0.00402 |
| 162 | C8  | DZZ | 0.00463  | 0.00764  | -0.00094 | 0.00035  | -0.00341 |
| 163 | C8  | DXY | -0.00916 | 0.00292  | 0.00844  | 0.00765  | 0.00234  |
| 164 | C8  | DXZ | 0.00000  | 0.00000  | 0.00000  | 0.00000  | 0.00000  |
| 165 | C8  | DYZ | 0.00000  | 0.00000  | 0.00000  | 0.00000  | 0.00000  |
| 166 | H8  | S   | -0.05559 | 0.00114  | 0.03915  | 0.04244  | 0.03237  |
| 167 | H8  | S   | -0.01066 | -0.00105 | 0.00736  | 0.00452  | 0.00864  |
| 168 | H8  | PX  | 0.00555  | -0.00013 | -0.00361 | -0.00376 | -0.00267 |
| 169 | H8  | PY  | -0.00071 | 0.00103  | 0.00042  | 0.00073  | -0.00004 |
| 170 | H8  | PZ  | 0.00000  | 0.00000  | 0.00000  | 0.00000  | 0.00000  |
| 171 | C10 | S   | 0.04977  | 0.13180  | -0.02938 | 0.05405  | 0.08586  |
| 172 | C10 | S   | -0.09534 | -0.25340 | 0.05621  | -0.10445 | -0.16694 |
| 173 | C10 | PX  | -0.00260 | 0.01903  | 0.01004  | 0.01497  | -0.00764 |
| 174 | C10 | PY  | -0.04046 | -0.08618 | 0.01815  | -0.01754 | 0.01281  |
| 175 | C10 | PZ  | 0.00000  | 0.00000  | 0.00000  | 0.00000  | 0.00000  |
| 176 | C10 | S   | -0.07753 | -0.19722 | 0.05074  | -0.07824 | -0.14095 |
| 177 | C10 | PX  | 0.00018  | 0.00367  | 0.00118  | -0.00318 | -0.01098 |
| 178 | C10 | PY  | -0.00530 | -0.00781 | 0.00394  | 0.00082  | 0.00971  |
| 179 | C10 | PZ  | 0.00000  | 0.00000  | 0.00000  | 0.00000  | 0.00000  |
| 180 | C10 | DXX | 0.00191  | 0.00226  | -0.00078 | -0.00046 | -0.00317 |
| 181 | C10 | DYY | -0.00490 | -0.01141 | 0.00261  | -0.00354 | -0.00292 |
| 182 | C10 | DZZ | 0.00404  | 0.01095  | -0.00248 | 0.00465  | 0.00737  |
| 183 | C10 | DXY | -0.00035 | 0.00357  | 0.00105  | 0.00202  | -0.00036 |
| 184 | C10 | DXZ | 0.00000  | 0.00000  | 0.00000  | 0.00000  | 0.00000  |
| 185 | C10 | DYZ | 0.00000  | 0.00000  | 0.00000  | 0.00000  | 0.00000  |
| 186 | H16 | S   | -0.02971 | -0.07442 | 0.02251  | -0.03185 | -0.07407 |
| 187 | H16 | S   | -0.00679 | -0.01773 | 0.00739  | -0.00737 | -0.02687 |
| 188 | H16 | PX  | 0.00307  | 0.00723  | -0.00218 | 0.00296  | 0.00624  |
| 189 | H16 | PY  | -0.00157 | -0.00354 | 0.00108  | -0.00121 | -0.00228 |
| 190 | H16 | PZ  | 0.00000  | 0.00000  | 0.00000  | 0.00000  | 0.00000  |
| 191 | H18 | S   | -0.02219 | -0.07399 | 0.01282  | -0.03976 | -0.06985 |
| 192 | H18 | S   | -0.00166 | -0.01477 | 0.00181  | -0.01426 | -0.02854 |
| 193 | H18 | PX  | -0.00159 | -0.00532 | 0.00099  | -0.00275 | -0.00488 |
| 194 | H18 | PY  | -0.00165 | -0.00608 | 0.00077  | -0.00303 | -0.00409 |
| 195 | H18 | PZ  | 0.00000  | 0.00000  | 0.00000  | 0.00000  | 0.00000  |
| 196 | C9  | S   | -0.00118 | -0.04517 | -0.08845 | 0.12012  | -0.06968 |
| 197 | C9  | S   | 0.00234  | 0.08810  | 0.17312  | -0.23432 | 0.13590  |
| 198 | C9  | PX  | -0.00501 | -0.01422 | -0.02448 | -0.02404 | 0.06104  |
| 199 | C9  | PY  | 0.00266  | -0.00259 | 0.01003  | -0.00903 | 0.02942  |
| 200 | C9  | PZ  | 0.00000  | 0.00000  | 0.00000  | 0.00000  | 0.00000  |
| 201 | C9  | S   | -0.00068 | 0.06283  | 0.12898  | -0.20316 | 0.14302  |
| 202 | C9  | PX  | -0.00068 | 0.00555  | 0.00903  | -0.02062 | 0.01919  |
| 203 | C9  | PY  | 0.00106  | -0.00085 | 0.00358  | 0.00222  | 0.00355  |

|     |    |     |          |          |          |          |          |
|-----|----|-----|----------|----------|----------|----------|----------|
| 204 | C9 | PZ  | 0.00000  | 0.00000  | 0.00000  | 0.00000  | 0.00000  |
| 205 | C9 | DXX | 0.00058  | 0.00285  | 0.00472  | 0.00109  | -0.00698 |
| 206 | C9 | DYY | -0.00023 | -0.00083 | -0.00202 | 0.00059  | 0.00053  |
| 207 | C9 | DZZ | -0.00043 | -0.00170 | -0.00309 | 0.00005  | 0.00316  |
| 208 | C9 | DXY | 0.00027  | 0.00162  | 0.00153  | 0.00197  | -0.00610 |
| 209 | C9 | DXZ | 0.00000  | 0.00000  | 0.00000  | 0.00000  | 0.00000  |
| 210 | C9 | DYZ | 0.00000  | 0.00000  | 0.00000  | 0.00000  | 0.00000  |
| 211 | H3 | S   | 0.00205  | 0.03072  | 0.06738  | -0.08951 | 0.06349  |
| 212 | H3 | S   | 0.00067  | 0.00995  | 0.02200  | -0.03100 | 0.02471  |
| 213 | H3 | PX  | 0.00000  | 0.00060  | 0.00130  | -0.00211 | 0.00171  |
| 214 | H3 | PY  | -0.00015 | -0.00297 | -0.00616 | 0.00806  | -0.00511 |
| 215 | H3 | PZ  | 0.00000  | 0.00000  | 0.00000  | 0.00000  | 0.00000  |
| 216 | H5 | S   | -0.00108 | 0.02810  | 0.05452  | -0.09218 | 0.06522  |
| 217 | H5 | S   | 0.00009  | 0.00627  | 0.01354  | -0.02619 | 0.02274  |
| 218 | H5 | PX  | -0.00012 | -0.00171 | -0.00338 | 0.00418  | -0.00220 |
| 219 | H5 | PY  | 0.00009  | 0.00076  | 0.00173  | -0.00222 | 0.00178  |
| 220 | H5 | PZ  | 0.00004  | 0.00228  | 0.00454  | -0.00688 | 0.00460  |
| 221 | H7 | S   | -0.00108 | 0.02810  | 0.05452  | -0.09218 | 0.06522  |
| 222 | H7 | S   | 0.00009  | 0.00627  | 0.01354  | -0.02619 | 0.02274  |
| 223 | H7 | PX  | -0.00012 | -0.00171 | -0.00338 | 0.00418  | -0.00220 |
| 224 | H7 | PY  | 0.00009  | 0.00076  | 0.00173  | -0.00222 | 0.00178  |
| 225 | H7 | PZ  | -0.00004 | -0.00228 | -0.00454 | 0.00688  | -0.00460 |

|              |           |           |           |           |           |
|--------------|-----------|-----------|-----------|-----------|-----------|
| MO:          | 21        | 22        | 23        | 24        | 25        |
| Eigenvalues: | -0.80914  | -0.78893  | -0.75398  | -0.71283  | -0.69053  |
| (ev):        | -22.01776 | -21.46801 | -20.51684 | -19.39700 | -18.79033 |

|    |    |     |          |          |          |          |          |
|----|----|-----|----------|----------|----------|----------|----------|
|    |    | A   | A        | A        | A        | A        |          |
| 1  | H1 | S   | 0.08957  | -0.05558 | 0.07055  | -0.04284 | -0.00203 |
| 2  | H1 | S   | 0.04411  | -0.02156 | 0.04148  | -0.02747 | -0.00689 |
| 3  | H1 | PX  | -0.00692 | 0.00301  | -0.00388 | 0.00241  | -0.00103 |
| 4  | H1 | PY  | -0.00120 | 0.00339  | -0.00259 | 0.00033  | 0.00274  |
| 5  | H1 | PZ  | 0.00000  | 0.00000  | 0.00000  | 0.00000  | 0.00000  |
| 6  | C1 | S   | -0.05475 | 0.04801  | -0.01669 | -0.01564 | -0.00206 |
| 7  | C1 | S   | 0.10543  | -0.09677 | 0.03415  | 0.02966  | 0.00110  |
| 8  | C1 | PX  | 0.05386  | -0.07982 | 0.11873  | -0.09988 | -0.06175 |
| 9  | C1 | PY  | 0.10514  | 0.15356  | -0.04132 | -0.01112 | 0.17702  |
| 10 | C1 | PZ  | 0.00000  | 0.00000  | 0.00000  | 0.00000  | 0.00000  |
| 11 | C1 | S   | 0.11926  | -0.06094 | 0.03315  | 0.03347  | 0.01070  |
| 12 | C1 | PX  | 0.01633  | -0.04176 | 0.04066  | -0.03564 | -0.01654 |
| 13 | C1 | PY  | 0.03258  | 0.03364  | -0.00567 | -0.01127 | 0.06613  |
| 14 | C1 | PZ  | 0.00000  | 0.00000  | 0.00000  | 0.00000  | 0.00000  |
| 15 | C1 | DXX | 0.00437  | 0.00142  | -0.00080 | 0.00462  | 0.00494  |
| 16 | C1 | DYY | -0.00178 | -0.00825 | 0.00314  | -0.00438 | -0.00786 |
| 17 | C1 | DZZ | -0.00363 | 0.00350  | -0.00093 | -0.00080 | -0.00035 |
| 18 | C1 | DXY | -0.00543 | -0.01001 | 0.00294  | -0.00336 | -0.00905 |
| 19 | C1 | DXZ | 0.00000  | 0.00000  | 0.00000  | 0.00000  | 0.00000  |
| 20 | C1 | DYZ | 0.00000  | 0.00000  | 0.00000  | 0.00000  | 0.00000  |
| 21 | C2 | S   | -0.08677 | 0.00552  | 0.01176  | 0.03219  | 0.01285  |
| 22 | C2 | S   | 0.17335  | -0.00641 | -0.02397 | -0.06559 | -0.02867 |
| 23 | C2 | PX  | -0.08573 | 0.06374  | -0.08517 | 0.10132  | -0.03896 |
| 24 | C2 | PY  | -0.02692 | -0.14145 | -0.00890 | -0.02329 | 0.15879  |
| 25 | C2 | PZ  | 0.00000  | 0.00000  | 0.00000  | 0.00000  | 0.00000  |
| 26 | C2 | S   | 0.14700  | -0.03489 | 0.00329  | -0.06238 | -0.01868 |

|    |    |     |          |          |          |          |          |
|----|----|-----|----------|----------|----------|----------|----------|
| 27 | C2 | PX  | -0.04706 | 0.00282  | -0.01539 | 0.05109  | -0.00232 |
| 28 | C2 | PY  | -0.00619 | -0.03559 | 0.00434  | 0.00754  | 0.04006  |
| 29 | C2 | PZ  | 0.00000  | 0.00000  | 0.00000  | 0.00000  | 0.00000  |
| 30 | C2 | DXX | 0.00310  | 0.00641  | -0.00306 | -0.00264 | -0.00819 |
| 31 | C2 | DYY | 0.00183  | -0.00347 | 0.00365  | 0.00262  | 0.00465  |
| 32 | C2 | DZZ | -0.00583 | 0.00041  | 0.00104  | 0.00152  | 0.00086  |
| 33 | C2 | DXY | 0.00195  | -0.00792 | 0.00017  | -0.00297 | 0.00615  |
| 34 | C2 | DXZ | 0.00000  | 0.00000  | 0.00000  | 0.00000  | 0.00000  |
| 35 | C2 | DYZ | 0.00000  | 0.00000  | 0.00000  | 0.00000  | 0.00000  |
| 36 | C3 | S   | 0.06495  | 0.05277  | -0.00785 | 0.04330  | 0.01990  |
| 37 | C3 | S   | -0.13054 | -0.10537 | 0.01616  | -0.08859 | -0.04169 |
| 38 | C3 | PX  | 0.11679  | -0.06392 | 0.17277  | 0.01088  | -0.06959 |
| 39 | C3 | PY  | 0.01272  | -0.12025 | -0.00358 | 0.09313  | -0.14481 |
| 40 | C3 | PZ  | 0.00000  | 0.00000  | 0.00000  | 0.00000  | 0.00000  |
| 41 | C3 | S   | -0.10078 | -0.09288 | 0.03403  | -0.07563 | -0.05787 |
| 42 | C3 | PX  | 0.03608  | -0.00105 | 0.06218  | -0.00631 | -0.02028 |
| 43 | C3 | PY  | -0.01317 | -0.07611 | -0.00745 | 0.02362  | -0.03704 |
| 44 | C3 | PZ  | 0.00000  | 0.00000  | 0.00000  | 0.00000  | 0.00000  |
| 45 | C3 | DXX | -0.00900 | 0.00559  | -0.00449 | -0.00187 | 0.00071  |
| 46 | C3 | DYY | 0.00316  | -0.00850 | 0.00196  | 0.00138  | -0.00022 |
| 47 | C3 | DZZ | 0.00481  | 0.00352  | 0.00067  | 0.00243  | 0.00047  |
| 48 | C3 | DXY | -0.00529 | -0.00419 | -0.00412 | -0.00196 | 0.00095  |
| 49 | C3 | DXZ | 0.00000  | 0.00000  | 0.00000  | 0.00000  | 0.00000  |
| 50 | C3 | DYZ | 0.00000  | 0.00000  | 0.00000  | 0.00000  | 0.00000  |
| 51 | C4 | S   | 0.00925  | -0.08006 | 0.01292  | -0.00553 | -0.00382 |
| 52 | C4 | S   | -0.01960 | 0.17103  | -0.02669 | 0.01005  | 0.00766  |
| 53 | C4 | PX  | 0.18642  | 0.01816  | -0.05263 | -0.06064 | 0.16597  |
| 54 | C4 | PY  | 0.01598  | 0.03798  | 0.07079  | -0.22342 | -0.09874 |
| 55 | C4 | PZ  | 0.00000  | 0.00000  | 0.00000  | 0.00000  | 0.00000  |
| 56 | C4 | S   | -0.03915 | 0.10340  | -0.01725 | 0.04564  | 0.00743  |
| 57 | C4 | PX  | 0.04726  | 0.00254  | -0.01340 | -0.02839 | 0.03589  |
| 58 | C4 | PY  | 0.01664  | 0.00290  | 0.00728  | -0.03596 | -0.01443 |
| 59 | C4 | PZ  | 0.00000  | 0.00000  | 0.00000  | 0.00000  | 0.00000  |
| 60 | C4 | DXX | -0.00605 | 0.00042  | 0.00217  | 0.01233  | 0.00604  |
| 61 | C4 | DYY | 0.00315  | 0.00401  | 0.00046  | -0.01830 | -0.00934 |
| 62 | C4 | DZZ | 0.00088  | -0.00653 | 0.00032  | 0.00326  | 0.00138  |
| 63 | C4 | DXY | -0.00418 | 0.00082  | -0.00031 | -0.00251 | 0.00290  |
| 64 | C4 | DXZ | 0.00000  | 0.00000  | 0.00000  | 0.00000  | 0.00000  |
| 65 | C4 | DYZ | 0.00000  | 0.00000  | 0.00000  | 0.00000  | 0.00000  |
| 66 | C5 | S   | 0.04337  | 0.04204  | -0.02829 | -0.01478 | -0.03001 |
| 67 | C5 | S   | -0.08825 | -0.08315 | 0.05896  | 0.03039  | 0.05897  |
| 68 | C5 | PX  | -0.09147 | 0.11815  | -0.06156 | 0.11508  | -0.10411 |
| 69 | C5 | PY  | -0.12087 | 0.04637  | 0.09576  | 0.02166  | -0.07418 |
| 70 | C5 | PZ  | 0.00000  | 0.00000  | 0.00000  | 0.00000  | 0.00000  |
| 71 | C5 | S   | -0.07723 | -0.06213 | 0.04892  | 0.00785  | 0.05566  |
| 72 | C5 | PX  | -0.00871 | 0.04251  | -0.03190 | 0.03758  | -0.04391 |
| 73 | C5 | PY  | -0.04097 | -0.00713 | 0.04805  | 0.00764  | -0.02159 |
| 74 | C5 | PZ  | 0.00000  | 0.00000  | 0.00000  | 0.00000  | 0.00000  |
| 75 | C5 | DXX | -0.00975 | 0.00682  | 0.00182  | 0.00702  | -0.00351 |
| 76 | C5 | DYY | 0.00429  | -0.00572 | -0.00016 | -0.00497 | 0.00247  |
| 77 | C5 | DZZ | 0.00379  | 0.00251  | -0.00160 | -0.00120 | -0.00152 |
| 78 | C5 | DXY | 0.00204  | 0.00282  | -0.00153 | -0.00259 | -0.00301 |
| 79 | C5 | DXZ | 0.00000  | 0.00000  | 0.00000  | 0.00000  | 0.00000  |
| 80 | C5 | DYZ | 0.00000  | 0.00000  | 0.00000  | 0.00000  | 0.00000  |

|     |    |     |          |          |          |          |          |
|-----|----|-----|----------|----------|----------|----------|----------|
| 81  | C6 | S   | 0.04005  | -0.06350 | 0.00675  | -0.01563 | -0.00295 |
| 82  | C6 | S   | -0.08214 | 0.13213  | -0.01212 | 0.03434  | 0.00679  |
| 83  | C6 | PX  | -0.15669 | -0.06580 | -0.09797 | -0.09750 | 0.12714  |
| 84  | C6 | PY  | -0.01206 | 0.01108  | -0.18498 | -0.05396 | -0.11850 |
| 85  | C6 | PZ  | 0.00000  | 0.00000  | 0.00000  | 0.00000  | 0.00000  |
| 86  | C6 | S   | -0.06085 | 0.13298  | -0.01740 | 0.01348  | -0.01426 |
| 87  | C6 | PX  | -0.05989 | -0.02020 | -0.02049 | -0.03847 | 0.06205  |
| 88  | C6 | PY  | -0.00008 | 0.02213  | -0.06419 | -0.01505 | -0.03838 |
| 89  | C6 | PZ  | 0.00000  | 0.00000  | 0.00000  | 0.00000  | 0.00000  |
| 90  | C6 | DXX | -0.00534 | 0.00236  | -0.01119 | -0.01153 | -0.00134 |
| 91  | C6 | DYY | 0.00252  | -0.00004 | 0.00633  | 0.00733  | 0.00217  |
| 92  | C6 | DZZ | 0.00294  | -0.00448 | -0.00040 | -0.00145 | -0.00154 |
| 93  | C6 | DXY | -0.01156 | -0.00323 | 0.00766  | 0.00336  | 0.00276  |
| 94  | C6 | DXZ | 0.00000  | 0.00000  | 0.00000  | 0.00000  | 0.00000  |
| 95  | C6 | DYZ | 0.00000  | 0.00000  | 0.00000  | 0.00000  | 0.00000  |
| 96  | C7 | S   | -0.05975 | -0.04770 | -0.04055 | -0.03791 | -0.00135 |
| 97  | C7 | S   | 0.12092  | 0.09513  | 0.08175  | 0.07494  | 0.00146  |
| 98  | C7 | PX  | 0.05970  | 0.01987  | 0.11954  | 0.14927  | -0.10850 |
| 99  | C7 | PY  | -0.07849 | -0.08329 | 0.12687  | -0.10779 | -0.01879 |
| 100 | C7 | PZ  | 0.00000  | 0.00000  | 0.00000  | 0.00000  | 0.00000  |
| 101 | C7 | S   | 0.08796  | 0.05525  | 0.06831  | 0.09473  | 0.00882  |
| 102 | C7 | PX  | 0.03556  | 0.03066  | 0.05591  | 0.06012  | -0.04932 |
| 103 | C7 | PY  | -0.02341 | -0.03746 | 0.02237  | -0.03399 | -0.00892 |
| 104 | C7 | PZ  | 0.00000  | 0.00000  | 0.00000  | 0.00000  | 0.00000  |
| 105 | C7 | DXX | 0.00371  | 0.00590  | -0.00092 | 0.00503  | 0.00258  |
| 106 | C7 | DYY | 0.00121  | -0.00202 | -0.00065 | -0.00228 | -0.00197 |
| 107 | C7 | DZZ | -0.00401 | -0.00340 | -0.00176 | -0.00261 | -0.00069 |
| 108 | C7 | DXY | 0.00813  | 0.00333  | -0.01065 | 0.00645  | -0.00009 |
| 109 | C7 | DXZ | 0.00000  | 0.00000  | 0.00000  | 0.00000  | 0.00000  |
| 110 | C7 | DYZ | 0.00000  | 0.00000  | 0.00000  | 0.00000  | 0.00000  |
| 111 | O1 | S   | -0.00541 | 0.04426  | 0.00584  | -0.02226 | 0.00513  |
| 112 | O1 | S   | 0.01188  | -0.10397 | -0.01222 | 0.05353  | -0.01420 |
| 113 | O1 | PX  | 0.06890  | 0.00467  | -0.05016 | -0.00042 | 0.21744  |
| 114 | O1 | PY  | -0.02850 | -0.19951 | -0.04677 | 0.29547  | 0.08164  |
| 115 | O1 | PZ  | 0.00000  | 0.00000  | 0.00000  | 0.00000  | 0.00000  |
| 116 | O1 | S   | 0.01818  | -0.15403 | -0.02418 | 0.07983  | -0.01290 |
| 117 | O1 | PX  | 0.04114  | 0.00203  | -0.03197 | 0.00150  | 0.14548  |
| 118 | O1 | PY  | -0.01433 | -0.12203 | -0.02600 | 0.18172  | 0.05038  |
| 119 | O1 | PZ  | 0.00000  | 0.00000  | 0.00000  | 0.00000  | 0.00000  |
| 120 | O1 | DXX | 0.00119  | -0.00452 | -0.00221 | 0.00575  | 0.01171  |
| 121 | O1 | DYY | -0.00049 | 0.01087  | 0.00249  | -0.00987 | -0.00837 |
| 122 | O1 | DZZ | -0.00132 | -0.00399 | 0.00071  | 0.00385  | -0.00357 |
| 123 | O1 | DXY | -0.00756 | -0.00832 | 0.00058  | 0.01379  | -0.00643 |
| 124 | O1 | DXZ | 0.00000  | 0.00000  | 0.00000  | 0.00000  | 0.00000  |
| 125 | O1 | DYZ | 0.00000  | 0.00000  | 0.00000  | 0.00000  | 0.00000  |
| 126 | H4 | S   | -0.04954 | -0.06252 | 0.08480  | -0.01972 | 0.03901  |
| 127 | H4 | S   | -0.01702 | -0.02932 | 0.03826  | -0.00679 | 0.01855  |
| 128 | H4 | PX  | -0.00394 | -0.00252 | 0.00412  | -0.00007 | 0.00027  |
| 129 | H4 | PY  | 0.00118  | 0.00464  | -0.00375 | 0.00160  | -0.00414 |
| 130 | H4 | PZ  | 0.00000  | 0.00000  | 0.00000  | 0.00000  | 0.00000  |
| 131 | N1 | S   | -0.01439 | 0.03597  | -0.04039 | -0.01554 | 0.01599  |
| 132 | N1 | S   | 0.03282  | -0.07719 | 0.09163  | 0.03367  | -0.03699 |
| 133 | N1 | PX  | -0.00625 | -0.06884 | -0.13401 | -0.08359 | 0.03669  |
| 134 | N1 | PY  | -0.03887 | 0.12500  | 0.13249  | 0.08354  | 0.12583  |

|     |     |     |          |          |          |          |          |
|-----|-----|-----|----------|----------|----------|----------|----------|
| 135 | N1  | PZ  | 0.00000  | 0.00000  | 0.00000  | 0.00000  | 0.00000  |
| 136 | N1  | S   | 0.03989  | -0.11124 | 0.08277  | 0.04434  | -0.06203 |
| 137 | N1  | PX  | 0.00397  | -0.03214 | -0.06974 | -0.03831 | 0.01673  |
| 138 | N1  | PY  | -0.02651 | 0.04992  | 0.04588  | 0.03391  | 0.06315  |
| 139 | N1  | PZ  | 0.00000  | 0.00000  | 0.00000  | 0.00000  | 0.00000  |
| 140 | N1  | DXX | 0.00390  | -0.00955 | -0.01764 | -0.00992 | -0.00170 |
| 141 | N1  | DYY | -0.00366 | 0.00924  | 0.01311  | 0.00686  | 0.00398  |
| 142 | N1  | DZZ | 0.00036  | 0.00153  | 0.00161  | 0.00069  | -0.00252 |
| 143 | N1  | DXY | -0.00649 | 0.00592  | 0.00319  | 0.00066  | 0.01396  |
| 144 | N1  | DXZ | 0.00000  | 0.00000  | 0.00000  | 0.00000  | 0.00000  |
| 145 | N1  | DYZ | 0.00000  | 0.00000  | 0.00000  | 0.00000  | 0.00000  |
| 146 | H6  | S   | 0.11992  | -0.01204 | 0.03260  | -0.07956 | -0.02152 |
| 147 | H6  | S   | 0.04952  | -0.01087 | 0.02257  | -0.03823 | -0.01236 |
| 148 | H6  | PX  | 0.00886  | -0.00057 | 0.00194  | -0.00454 | -0.00174 |
| 149 | H6  | PY  | 0.00299  | -0.00244 | 0.00028  | -0.00291 | 0.00202  |
| 150 | H6  | PZ  | 0.00000  | 0.00000  | 0.00000  | 0.00000  | 0.00000  |
| 151 | C8  | S   | -0.03640 | 0.00944  | 0.08766  | 0.00605  | 0.03379  |
| 152 | C8  | S   | 0.07441  | -0.02089 | -0.18051 | -0.01317 | -0.06862 |
| 153 | C8  | PX  | 0.03213  | 0.14963  | 0.01922  | 0.10082  | 0.04747  |
| 154 | C8  | PY  | 0.06173  | 0.02944  | -0.03744 | -0.00111 | 0.12865  |
| 155 | C8  | PZ  | 0.00000  | 0.00000  | 0.00000  | 0.00000  | 0.00000  |
| 156 | C8  | S   | 0.06839  | -0.00284 | -0.15129 | -0.00691 | -0.07104 |
| 157 | C8  | PX  | 0.01900  | 0.03259  | -0.00919 | 0.02725  | 0.00967  |
| 158 | C8  | PY  | 0.03559  | 0.02045  | -0.01817 | 0.00076  | 0.02575  |
| 159 | C8  | PZ  | 0.00000  | 0.00000  | 0.00000  | 0.00000  | 0.00000  |
| 160 | C8  | DXX | 0.00683  | -0.00707 | -0.00244 | 0.00107  | -0.00193 |
| 161 | C8  | DYY | -0.00332 | 0.00628  | -0.00082 | -0.00283 | 0.00626  |
| 162 | C8  | DZZ | -0.00266 | 0.00170  | 0.00665  | 0.00127  | 0.00174  |
| 163 | C8  | DXY | 0.00667  | 0.00750  | -0.00135 | 0.00350  | -0.00082 |
| 164 | C8  | DXZ | 0.00000  | 0.00000  | 0.00000  | 0.00000  | 0.00000  |
| 165 | C8  | DYZ | 0.00000  | 0.00000  | 0.00000  | 0.00000  | 0.00000  |
| 166 | H8  | S   | 0.08653  | 0.05824  | 0.09587  | 0.12486  | -0.05693 |
| 167 | H8  | S   | 0.03852  | 0.02286  | 0.04879  | 0.07261  | -0.03202 |
| 168 | H8  | PX  | -0.00667 | -0.00413 | -0.00695 | -0.00819 | 0.00382  |
| 169 | H8  | PY  | -0.00018 | -0.00067 | 0.00255  | -0.00091 | -0.00080 |
| 170 | H8  | PZ  | 0.00000  | 0.00000  | 0.00000  | 0.00000  | 0.00000  |
| 171 | C10 | S   | 0.05192  | -0.01064 | -0.05708 | 0.00604  | -0.02713 |
| 172 | C10 | S   | -0.10200 | 0.01987  | 0.11249  | -0.01285 | 0.05210  |
| 173 | C10 | PX  | 0.00208  | 0.06116  | 0.04399  | 0.06295  | 0.09375  |
| 174 | C10 | PY  | 0.06241  | -0.00790 | -0.15352 | 0.02728  | -0.16326 |
| 175 | C10 | PZ  | 0.00000  | 0.00000  | 0.00000  | 0.00000  | 0.00000  |
| 176 | C10 | S   | -0.08971 | 0.02822  | 0.11725  | -0.01580 | 0.06940  |
| 177 | C10 | PX  | -0.00741 | 0.01659  | 0.01818  | 0.02292  | 0.03725  |
| 178 | C10 | PY  | 0.02447  | 0.00099  | -0.05084 | 0.01391  | -0.05476 |
| 179 | C10 | PZ  | 0.00000  | 0.00000  | 0.00000  | 0.00000  | 0.00000  |
| 180 | C10 | DXX | -0.00513 | 0.00128  | 0.01152  | -0.00048 | 0.01134  |
| 181 | C10 | DYY | 0.00164  | -0.00044 | -0.00572 | 0.00058  | -0.00806 |
| 182 | C10 | DZZ | 0.00447  | -0.00095 | -0.00508 | 0.00033  | -0.00275 |
| 183 | C10 | DXY | -0.00110 | 0.00189  | 0.00366  | -0.00100 | 0.00361  |
| 184 | C10 | DXZ | 0.00000  | 0.00000  | 0.00000  | 0.00000  | 0.00000  |
| 185 | C10 | DYZ | 0.00000  | 0.00000  | 0.00000  | 0.00000  | 0.00000  |
| 186 | H16 | S   | -0.05446 | 0.03989  | 0.10396  | 0.02270  | 0.10798  |
| 187 | H16 | S   | -0.02343 | 0.02356  | 0.05900  | 0.01768  | 0.06922  |
| 188 | H16 | PX  | 0.00428  | -0.00247 | -0.00687 | -0.00088 | -0.00630 |

|     |     |     |          |          |          |          |          |
|-----|-----|-----|----------|----------|----------|----------|----------|
| 189 | H16 | PY  | -0.00069 | 0.00122  | 0.00105  | 0.00126  | 0.00027  |
| 190 | H16 | PZ  | 0.00000  | 0.00000  | 0.00000  | 0.00000  | 0.00000  |
| 191 | H18 | S   | -0.06636 | -0.01030 | 0.09104  | -0.04051 | 0.05047  |
| 192 | H18 | S   | -0.03287 | -0.00614 | 0.05154  | -0.02072 | 0.03195  |
| 193 | H18 | PX  | -0.00431 | 0.00011  | 0.00595  | -0.00160 | 0.00414  |
| 194 | H18 | PY  | -0.00296 | -0.00113 | 0.00284  | -0.00178 | -0.00030 |
| 195 | H18 | PZ  | 0.00000  | 0.00000  | 0.00000  | 0.00000  | 0.00000  |
| 196 | C9  | S   | 0.02926  | -0.03874 | -0.00927 | 0.01533  | 0.01918  |
| 197 | C9  | S   | -0.05871 | 0.07420  | 0.01713  | -0.02633 | -0.03735 |
| 198 | C9  | PX  | -0.03235 | 0.13325  | 0.05313  | -0.17538 | -0.12929 |
| 199 | C9  | PY  | -0.05540 | 0.00220  | 0.01202  | 0.07437  | -0.11180 |
| 200 | C9  | PZ  | 0.00000  | 0.00000  | 0.00000  | 0.00000  | 0.00000  |
| 201 | C9  | S   | -0.06870 | 0.10817  | 0.03389  | -0.06400 | -0.08003 |
| 202 | C9  | PX  | -0.00637 | 0.03780  | 0.01404  | -0.05771 | -0.03032 |
| 203 | C9  | PY  | -0.02072 | -0.00694 | -0.00011 | 0.04212  | -0.04303 |
| 204 | C9  | PZ  | 0.00000  | 0.00000  | 0.00000  | 0.00000  | 0.00000  |
| 205 | C9  | DXX | 0.00438  | -0.01421 | -0.00535 | 0.01404  | 0.01436  |
| 206 | C9  | DYY | -0.00043 | 0.00262  | 0.00042  | 0.00007  | -0.00332 |
| 207 | C9  | DZZ | -0.00169 | 0.00838  | 0.00336  | -0.01199 | -0.00728 |
| 208 | C9  | DXY | 0.00595  | -0.00714 | -0.00433 | 0.00437  | 0.01453  |
| 209 | C9  | DXZ | 0.00000  | 0.00000  | 0.00000  | 0.00000  | 0.00000  |
| 210 | C9  | DYZ | 0.00000  | 0.00000  | 0.00000  | 0.00000  | 0.00000  |
| 211 | H3  | S   | -0.04945 | 0.02519  | 0.01046  | 0.04028  | -0.07055 |
| 212 | H3  | S   | -0.02146 | 0.00978  | 0.00501  | 0.02649  | -0.03946 |
| 213 | H3  | PX  | -0.00103 | 0.00167  | 0.00066  | -0.00138 | -0.00209 |
| 214 | H3  | PY  | 0.00317  | -0.00211 | -0.00063 | -0.00172 | 0.00346  |
| 215 | H3  | PZ  | 0.00000  | 0.00000  | 0.00000  | 0.00000  | 0.00000  |
| 216 | H5  | S   | -0.02453 | 0.06819  | 0.02233  | -0.07585 | -0.04082 |
| 217 | H5  | S   | -0.01074 | 0.03130  | 0.01166  | -0.04388 | -0.02506 |
| 218 | H5  | PX  | 0.00085  | -0.00085 | -0.00008 | 0.00020  | -0.00021 |
| 219 | H5  | PY  | -0.00131 | 0.00132  | 0.00045  | -0.00031 | -0.00208 |
| 220 | H5  | PZ  | -0.00183 | 0.00428  | 0.00130  | -0.00447 | -0.00243 |
| 221 | H7  | S   | -0.02453 | 0.06819  | 0.02233  | -0.07585 | -0.04082 |
| 222 | H7  | S   | -0.01074 | 0.03130  | 0.01166  | -0.04388 | -0.02506 |
| 223 | H7  | PX  | 0.00085  | -0.00085 | -0.00008 | 0.00020  | -0.00021 |
| 224 | H7  | PY  | -0.00131 | 0.00132  | 0.00045  | -0.00031 | -0.00208 |
| 225 | H7  | PZ  | 0.00183  | -0.00428 | -0.00130 | 0.00447  | 0.00243  |

|              |           |           |           |           |           |
|--------------|-----------|-----------|-----------|-----------|-----------|
| MO:          | 26        | 27        | 28        | 29        | 30        |
| Eigenvalues: | -0.66680  | -0.66574  | -0.63677  | -0.61061  | -0.59333  |
| (ev):        | -18.14466 | -18.11570 | -17.32740 | -16.61563 | -16.14528 |

|    |    |    |          |          |          |          |          |
|----|----|----|----------|----------|----------|----------|----------|
|    |    | A  | A        | A        | A        | A        |          |
| 1  | H1 | S  | 0.00000  | 0.13519  | 0.06131  | 0.16822  | 0.09789  |
| 2  | H1 | S  | 0.00000  | 0.08301  | 0.04297  | 0.12321  | 0.07031  |
| 3  | H1 | PX | 0.00000  | -0.00715 | -0.00233 | -0.00856 | -0.00547 |
| 4  | H1 | PY | 0.00000  | -0.00302 | -0.00140 | -0.00269 | 0.00038  |
| 5  | H1 | PZ | -0.00145 | 0.00000  | 0.00000  | 0.00000  | 0.00000  |
| 6  | C1 | S  | 0.00000  | -0.04170 | 0.01101  | -0.02142 | -0.00632 |
| 7  | C1 | S  | 0.00000  | 0.08374  | -0.02000 | 0.03999  | 0.00888  |
| 8  | C1 | PX | 0.00000  | 0.16674  | 0.12658  | 0.21386  | 0.08818  |
| 9  | C1 | PY | 0.00000  | -0.01534 | -0.04094 | 0.08491  | 0.19323  |
| 10 | C1 | PZ | -0.05881 | 0.00000  | 0.00000  | 0.00000  | 0.00000  |
| 11 | C1 | S  | 0.00000  | 0.07304  | -0.04885 | 0.06053  | 0.02433  |



|    |    |     |          |          |          |          |          |
|----|----|-----|----------|----------|----------|----------|----------|
| 12 | C1 | PX  | 0.00000  | 0.08496  | 0.06698  | 0.09687  | 0.04890  |
| 13 | C1 | PY  | 0.00000  | 0.01004  | 0.00426  | 0.03108  | 0.08471  |
| 14 | C1 | PZ  | -0.03466 | 0.00000  | 0.00000  | 0.00000  | 0.00000  |
| 15 | C1 | DXX | 0.00000  | 0.00447  | 0.00025  | 0.01035  | 0.01028  |
| 16 | C1 | DYY | 0.00000  | -0.00242 | 0.00115  | -0.00872 | -0.01192 |
| 17 | C1 | DZZ | 0.00000  | -0.00242 | 0.00024  | -0.00153 | -0.00056 |
| 18 | C1 | DXY | 0.00000  | 0.01134  | 0.00836  | 0.00611  | -0.00346 |
| 19 | C1 | DXZ | 0.00515  | 0.00000  | 0.00000  | 0.00000  | 0.00000  |
| 20 | C1 | DYZ | -0.00387 | 0.00000  | 0.00000  | 0.00000  | 0.00000  |
| 21 | C2 | S   | 0.00000  | 0.02483  | 0.02784  | -0.01871 | 0.01434  |
| 22 | C2 | S   | 0.00000  | -0.05255 | -0.05625 | 0.03853  | -0.02919 |
| 23 | C2 | PX  | 0.00000  | -0.02340 | 0.24902  | 0.17614  | 0.04900  |
| 24 | C2 | PY  | 0.00000  | -0.04401 | 0.11732  | 0.10838  | -0.15818 |
| 25 | C2 | PZ  | -0.01899 | 0.00000  | 0.00000  | 0.00000  | 0.00000  |
| 26 | C2 | S   | 0.00000  | -0.00956 | -0.06198 | 0.04061  | -0.01048 |
| 27 | C2 | PX  | 0.00000  | 0.01845  | 0.13053  | 0.07601  | 0.03636  |
| 28 | C2 | PY  | 0.00000  | -0.00076 | 0.05073  | 0.03111  | -0.04679 |
| 29 | C2 | PZ  | -0.00761 | 0.00000  | 0.00000  | 0.00000  | 0.00000  |
| 30 | C2 | DXX | 0.00000  | -0.00025 | -0.01116 | -0.00614 | 0.00445  |
| 31 | C2 | DYY | 0.00000  | 0.00125  | 0.00887  | 0.00495  | -0.00162 |
| 32 | C2 | DZZ | 0.00000  | 0.00107  | 0.00205  | -0.00051 | 0.00058  |
| 33 | C2 | DXY | 0.00000  | -0.00676 | -0.00735 | 0.00157  | -0.01135 |
| 34 | C2 | DXZ | -0.00106 | 0.00000  | 0.00000  | 0.00000  | 0.00000  |
| 35 | C2 | DYZ | -0.00157 | 0.00000  | 0.00000  | 0.00000  | 0.00000  |
| 36 | C3 | S   | 0.00000  | 0.01524  | 0.00693  | 0.03949  | 0.02437  |
| 37 | C3 | S   | 0.00000  | -0.03105 | -0.01414 | -0.08142 | -0.05195 |
| 38 | C3 | PX  | 0.00000  | -0.09255 | -0.02838 | 0.01088  | -0.01001 |
| 39 | C3 | PY  | 0.00000  | 0.06981  | 0.04774  | -0.06355 | -0.18005 |
| 40 | C3 | PZ  | -0.02055 | 0.00000  | 0.00000  | 0.00000  | 0.00000  |
| 41 | C3 | S   | 0.00000  | -0.02589 | 0.02313  | -0.10820 | -0.04050 |
| 42 | C3 | PX  | 0.00000  | -0.03488 | -0.01707 | -0.00244 | -0.01752 |
| 43 | C3 | PY  | 0.00000  | 0.04573  | 0.02619  | -0.02309 | -0.06511 |
| 44 | C3 | PZ  | -0.00619 | 0.00000  | 0.00000  | 0.00000  | 0.00000  |
| 45 | C3 | DXX | 0.00000  | 0.00076  | 0.00832  | 0.00053  | 0.00632  |
| 46 | C3 | DYY | 0.00000  | 0.00206  | -0.00783 | -0.00275 | -0.00741 |
| 47 | C3 | DZZ | 0.00000  | 0.00017  | 0.00047  | 0.00136  | 0.00103  |
| 48 | C3 | DXY | 0.00000  | 0.01448  | 0.00358  | 0.00296  | -0.00337 |
| 49 | C3 | DXZ | 0.00014  | 0.00000  | 0.00000  | 0.00000  | 0.00000  |
| 50 | C3 | DYZ | -0.00123 | 0.00000  | 0.00000  | 0.00000  | 0.00000  |
| 51 | C4 | S   | 0.00000  | 0.03909  | 0.03787  | 0.01496  | -0.00783 |
| 52 | C4 | S   | 0.00000  | -0.08616 | -0.08146 | -0.03314 | 0.01776  |
| 53 | C4 | PX  | 0.00000  | -0.02548 | -0.02913 | -0.05564 | 0.01922  |
| 54 | C4 | PY  | 0.00000  | 0.06051  | 0.08757  | 0.04116  | -0.06621 |
| 55 | C4 | PZ  | -0.14054 | 0.00000  | 0.00000  | 0.00000  | 0.00000  |
| 56 | C4 | S   | 0.00000  | -0.04797 | -0.06978 | -0.01869 | 0.03370  |
| 57 | C4 | PX  | 0.00000  | -0.00960 | -0.00873 | -0.01469 | -0.00347 |
| 58 | C4 | PY  | 0.00000  | -0.00222 | -0.00947 | 0.01352  | -0.01020 |
| 59 | C4 | PZ  | -0.06533 | 0.00000  | 0.00000  | 0.00000  | 0.00000  |
| 60 | C4 | DXX | 0.00000  | 0.00372  | -0.00016 | 0.00074  | 0.01488  |
| 61 | C4 | DYY | 0.00000  | -0.00266 | 0.00532  | -0.00010 | -0.01804 |
| 62 | C4 | DZZ | 0.00000  | 0.00193  | 0.00033  | 0.00060  | 0.00163  |
| 63 | C4 | DXY | 0.00000  | -0.00566 | 0.01529  | -0.00019 | -0.00279 |
| 64 | C4 | DXZ | -0.00273 | 0.00000  | 0.00000  | 0.00000  | 0.00000  |
| 65 | C4 | DYZ | -0.01386 | 0.00000  | 0.00000  | 0.00000  | 0.00000  |

|     |    |     |          |          |          |          |          |
|-----|----|-----|----------|----------|----------|----------|----------|
| 66  | C5 | S   | 0.00000  | -0.02036 | -0.03819 | 0.00153  | -0.00927 |
| 67  | C5 | S   | 0.00000  | 0.04320  | 0.07866  | -0.00158 | 0.01766  |
| 68  | C5 | PX  | 0.00000  | -0.11545 | -0.02276 | 0.09343  | -0.01734 |
| 69  | C5 | PY  | 0.00000  | 0.14895  | -0.07374 | -0.19609 | 0.18518  |
| 70  | C5 | PZ  | -0.03835 | 0.00000  | 0.00000  | 0.00000  | 0.00000  |
| 71  | C5 | S   | 0.00000  | 0.02123  | 0.05903  | -0.02064 | 0.02221  |
| 72  | C5 | PX  | 0.00000  | -0.06628 | -0.03035 | 0.04806  | -0.02201 |
| 73  | C5 | PY  | 0.00000  | 0.08495  | 0.00055  | -0.07576 | 0.07919  |
| 74  | C5 | PZ  | -0.02128 | 0.00000  | 0.00000  | 0.00000  | 0.00000  |
| 75  | C5 | DXX | 0.00000  | -0.00057 | -0.00840 | -0.00898 | 0.00592  |
| 76  | C5 | DYY | 0.00000  | 0.00112  | 0.00762  | 0.00522  | -0.00255 |
| 77  | C5 | DZZ | 0.00000  | -0.00130 | -0.00183 | 0.00062  | -0.00105 |
| 78  | C5 | DXY | 0.00000  | -0.00884 | -0.00556 | 0.00726  | -0.01062 |
| 79  | C5 | DXZ | -0.00358 | 0.00000  | 0.00000  | 0.00000  | 0.00000  |
| 80  | C5 | DYZ | -0.00042 | 0.00000  | 0.00000  | 0.00000  | 0.00000  |
| 81  | C6 | S   | 0.00000  | -0.04351 | -0.02974 | 0.00329  | -0.04001 |
| 82  | C6 | S   | 0.00000  | 0.09570  | 0.06321  | -0.00804 | 0.08713  |
| 83  | C6 | PX  | 0.00000  | 0.02407  | -0.00947 | -0.01638 | -0.04887 |
| 84  | C6 | PY  | 0.00000  | -0.05608 | 0.05784  | 0.05462  | 0.06813  |
| 85  | C6 | PZ  | -0.01278 | 0.00000  | 0.00000  | 0.00000  | 0.00000  |
| 86  | C6 | S   | 0.00000  | 0.07597  | 0.04900  | -0.02451 | 0.08668  |
| 87  | C6 | PX  | 0.00000  | 0.01651  | -0.00829 | 0.00400  | -0.02435 |
| 88  | C6 | PY  | 0.00000  | -0.02847 | 0.01162  | 0.01299  | 0.00720  |
| 89  | C6 | PZ  | -0.00787 | 0.00000  | 0.00000  | 0.00000  | 0.00000  |
| 90  | C6 | DXX | 0.00000  | -0.00066 | -0.00685 | -0.00291 | 0.00750  |
| 91  | C6 | DYY | 0.00000  | -0.00011 | 0.00641  | 0.00556  | -0.00803 |
| 92  | C6 | DZZ | 0.00000  | -0.00285 | -0.00098 | 0.00001  | -0.00113 |
| 93  | C6 | DXY | 0.00000  | 0.00447  | 0.00206  | -0.01299 | -0.00685 |
| 94  | C6 | DXZ | -0.00030 | 0.00000  | 0.00000  | 0.00000  | 0.00000  |
| 95  | C6 | DYZ | -0.00030 | 0.00000  | 0.00000  | 0.00000  | 0.00000  |
| 96  | C7 | S   | 0.00000  | 0.03415  | -0.00399 | -0.00791 | -0.01884 |
| 97  | C7 | S   | 0.00000  | -0.06875 | 0.00725  | 0.01652  | 0.03988  |
| 98  | C7 | PX  | 0.00000  | -0.08398 | 0.14560  | -0.05993 | -0.03999 |
| 99  | C7 | PY  | 0.00000  | -0.16399 | -0.00943 | -0.04447 | 0.05441  |
| 100 | C7 | PZ  | -0.00764 | 0.00000  | 0.00000  | 0.00000  | 0.00000  |
| 101 | C7 | S   | 0.00000  | -0.05357 | 0.01357  | 0.02305  | 0.01352  |
| 102 | C7 | PX  | 0.00000  | -0.05195 | 0.06623  | -0.03156 | 0.00282  |
| 103 | C7 | PY  | 0.00000  | -0.05271 | -0.00241 | -0.00941 | 0.03247  |
| 104 | C7 | PZ  | -0.00432 | 0.00000  | 0.00000  | 0.00000  | 0.00000  |
| 105 | C7 | DXX | 0.00000  | -0.00300 | 0.00386  | 0.00310  | 0.00132  |
| 106 | C7 | DYY | 0.00000  | 0.00550  | -0.00339 | -0.00155 | -0.00185 |
| 107 | C7 | DZZ | 0.00000  | 0.00133  | -0.00025 | -0.00094 | -0.00070 |
| 108 | C7 | DXY | 0.00000  | 0.01187  | -0.00176 | 0.00432  | -0.00506 |
| 109 | C7 | DXZ | 0.00074  | 0.00000  | 0.00000  | 0.00000  | 0.00000  |
| 110 | C7 | DYZ | -0.00074 | 0.00000  | 0.00000  | 0.00000  | 0.00000  |
| 111 | O1 | S   | 0.00000  | -0.00756 | 0.00643  | -0.01749 | 0.00779  |
| 112 | O1 | S   | 0.00000  | 0.01892  | -0.01958 | 0.04467  | -0.01633 |
| 113 | O1 | PX  | 0.00000  | -0.09240 | 0.18061  | -0.21438 | 0.03483  |
| 114 | O1 | PY  | 0.00000  | 0.02412  | -0.08231 | 0.02150  | 0.10904  |
| 115 | O1 | PZ  | -0.40066 | 0.00000  | 0.00000  | 0.00000  | 0.00000  |
| 116 | O1 | S   | 0.00000  | 0.02772  | -0.00779 | 0.05747  | -0.03823 |
| 117 | O1 | PX  | 0.00000  | -0.06477 | 0.12437  | -0.15219 | 0.02360  |
| 118 | O1 | PY  | 0.00000  | 0.01820  | -0.05386 | 0.01879  | 0.07307  |
| 119 | O1 | PZ  | -0.26458 | 0.00000  | 0.00000  | 0.00000  | 0.00000  |

|     |     |     |          |          |          |          |          |
|-----|-----|-----|----------|----------|----------|----------|----------|
| 120 | O1  | DXX | 0.00000  | -0.00295 | 0.00939  | -0.01144 | 0.00424  |
| 121 | O1  | DYY | 0.00000  | -0.00030 | -0.00746 | 0.00604  | -0.00188 |
| 122 | O1  | DZZ | 0.00000  | 0.00250  | -0.00474 | 0.00546  | 0.00043  |
| 123 | O1  | DXY | 0.00000  | 0.00365  | -0.00887 | 0.00698  | 0.00362  |
| 124 | O1  | DXZ | -0.01809 | 0.00000  | 0.00000  | 0.00000  | 0.00000  |
| 125 | O1  | DYZ | 0.01235  | 0.00000  | 0.00000  | 0.00000  | 0.00000  |
| 126 | H4  | S   | 0.00000  | 0.13156  | 0.01793  | -0.12666 | 0.10417  |
| 127 | H4  | S   | 0.00000  | 0.07609  | -0.00697 | -0.08246 | 0.07454  |
| 128 | H4  | PX  | 0.00000  | 0.00569  | 0.00006  | -0.00436 | 0.00437  |
| 129 | H4  | PY  | 0.00000  | -0.00489 | -0.00219 | 0.00466  | -0.00239 |
| 130 | H4  | PZ  | -0.00090 | 0.00000  | 0.00000  | 0.00000  | 0.00000  |
| 131 | N1  | S   | 0.00000  | 0.03760  | -0.01122 | 0.00350  | 0.03446  |
| 132 | N1  | S   | 0.00000  | -0.08240 | 0.02469  | -0.00945 | -0.07499 |
| 133 | N1  | PX  | 0.00000  | -0.01417 | -0.03453 | 0.08633  | -0.01322 |
| 134 | N1  | PY  | 0.00000  | 0.16044  | -0.01297 | -0.03641 | 0.01407  |
| 135 | N1  | PZ  | -0.00802 | 0.00000  | 0.00000  | 0.00000  | 0.00000  |
| 136 | N1  | S   | 0.00000  | -0.13827 | 0.03907  | -0.00074 | -0.12222 |
| 137 | N1  | PX  | 0.00000  | -0.00337 | -0.01888 | 0.05132  | -0.00277 |
| 138 | N1  | PY  | 0.00000  | 0.07456  | -0.00609 | -0.01214 | 0.00163  |
| 139 | N1  | PZ  | -0.00394 | 0.00000  | 0.00000  | 0.00000  | 0.00000  |
| 140 | N1  | DXX | 0.00000  | -0.00493 | -0.00449 | 0.00887  | -0.00089 |
| 141 | N1  | DYY | 0.00000  | 0.00909  | 0.00187  | -0.00752 | 0.00504  |
| 142 | N1  | DZZ | 0.00000  | -0.00071 | 0.00119  | -0.00186 | 0.00055  |
| 143 | N1  | DXY | 0.00000  | 0.00939  | -0.00324 | 0.00145  | -0.00174 |
| 144 | N1  | DXZ | -0.00051 | 0.00000  | 0.00000  | 0.00000  | 0.00000  |
| 145 | N1  | DYZ | -0.00072 | 0.00000  | 0.00000  | 0.00000  | 0.00000  |
| 146 | H6  | S   | 0.00000  | -0.00642 | -0.19416 | -0.10381 | -0.01513 |
| 147 | H6  | S   | 0.00000  | 0.00360  | -0.11850 | -0.07692 | -0.00542 |
| 148 | H6  | PX  | 0.00000  | -0.00060 | -0.01016 | -0.00520 | -0.00053 |
| 149 | H6  | PY  | 0.00000  | -0.00072 | -0.00314 | -0.00073 | -0.00263 |
| 150 | H6  | PZ  | -0.00042 | 0.00000  | 0.00000  | 0.00000  | 0.00000  |
| 151 | C8  | S   | 0.00000  | -0.04177 | 0.00160  | 0.00538  | -0.00529 |
| 152 | C8  | S   | 0.00000  | 0.08657  | -0.00444 | -0.00936 | 0.00937  |
| 153 | C8  | PX  | 0.00000  | 0.18515  | -0.00806 | -0.04445 | -0.00859 |
| 154 | C8  | PY  | 0.00000  | -0.00779 | -0.09522 | 0.17134  | -0.06158 |
| 155 | C8  | PZ  | -0.00458 | 0.00000  | 0.00000  | 0.00000  | 0.00000  |
| 156 | C8  | S   | 0.00000  | 0.07050  | -0.00373 | -0.00003 | 0.02351  |
| 157 | C8  | PX  | 0.00000  | 0.05415  | -0.00534 | -0.00432 | 0.02303  |
| 158 | C8  | PY  | 0.00000  | 0.00093  | -0.02199 | 0.03904  | 0.00259  |
| 159 | C8  | PZ  | -0.00212 | 0.00000  | 0.00000  | 0.00000  | 0.00000  |
| 160 | C8  | DXX | 0.00000  | -0.00946 | 0.00021  | 0.00821  | -0.01125 |
| 161 | C8  | DYY | 0.00000  | 0.00784  | -0.00346 | -0.00259 | 0.00995  |
| 162 | C8  | DZZ | 0.00000  | -0.00113 | 0.00037  | -0.00075 | 0.00012  |
| 163 | C8  | DXY | 0.00000  | -0.00136 | -0.00119 | 0.00239  | 0.01080  |
| 164 | C8  | DXZ | 0.00018  | 0.00000  | 0.00000  | 0.00000  | 0.00000  |
| 165 | C8  | DYZ | -0.00028 | 0.00000  | 0.00000  | 0.00000  | 0.00000  |
| 166 | H8  | S   | 0.00000  | -0.07637 | 0.09307  | -0.02312 | -0.00696 |
| 167 | H8  | S   | 0.00000  | -0.04162 | 0.06353  | -0.01120 | -0.01302 |
| 168 | H8  | PX  | 0.00000  | 0.00483  | -0.00519 | 0.00155  | 0.00020  |
| 169 | H8  | PY  | 0.00000  | -0.00262 | 0.00054  | -0.00061 | 0.00109  |
| 170 | H8  | PZ  | -0.00012 | 0.00000  | 0.00000  | 0.00000  | 0.00000  |
| 171 | C10 | S   | 0.00000  | 0.01053  | 0.00420  | 0.00059  | -0.00487 |
| 172 | C10 | S   | 0.00000  | -0.02199 | -0.00787 | -0.00230 | 0.01124  |
| 173 | C10 | PX  | 0.00000  | 0.13466  | -0.03838 | 0.03337  | -0.30449 |

|     |     |     |          |          |          |          |          |
|-----|-----|-----|----------|----------|----------|----------|----------|
| 174 | C10 | PY  | 0.00000  | 0.16030  | 0.07629  | -0.17309 | -0.00037 |
| 175 | C10 | PZ  | -0.00175 | 0.00000  | 0.00000  | 0.00000  | 0.00000  |
| 176 | C10 | S   | 0.00000  | -0.02631 | -0.01314 | 0.00075  | 0.01931  |
| 177 | C10 | PX  | 0.00000  | 0.05809  | -0.01576 | 0.01162  | -0.15249 |
| 178 | C10 | PY  | 0.00000  | 0.06366  | 0.03014  | -0.07018 | -0.01334 |
| 179 | C10 | PZ  | -0.00081 | 0.00000  | 0.00000  | 0.00000  | 0.00000  |
| 180 | C10 | DXX | 0.00000  | -0.00640 | -0.00471 | 0.00959  | -0.00932 |
| 181 | C10 | DYY | 0.00000  | 0.00344  | 0.00374  | -0.00698 | 0.00777  |
| 182 | C10 | DZZ | 0.00000  | 0.00122  | 0.00052  | -0.00066 | 0.00024  |
| 183 | C10 | DXY | 0.00000  | -0.00628 | -0.00158 | 0.00394  | 0.01363  |
| 184 | C10 | DXZ | 0.00005  | 0.00000  | 0.00000  | 0.00000  | 0.00000  |
| 185 | C10 | DYZ | -0.00022 | 0.00000  | 0.00000  | 0.00000  | 0.00000  |
| 186 | H16 | S   | 0.00000  | 0.02940  | -0.04099 | 0.05634  | -0.18132 |
| 187 | H16 | S   | 0.00000  | 0.01771  | -0.02779 | 0.04442  | -0.13822 |
| 188 | H16 | PX  | 0.00000  | -0.00087 | 0.00227  | -0.00294 | 0.00770  |
| 189 | H16 | PY  | 0.00000  | 0.00295  | 0.00034  | -0.00139 | -0.00388 |
| 190 | H16 | PZ  | -0.00004 | 0.00000  | 0.00000  | 0.00000  | 0.00000  |
| 191 | H18 | S   | 0.00000  | -0.13134 | -0.01873 | 0.05740  | 0.14597  |
| 192 | H18 | S   | 0.00000  | -0.08414 | -0.01246 | 0.04162  | 0.09397  |
| 193 | H18 | PX  | 0.00000  | -0.00548 | -0.00145 | 0.00339  | 0.00413  |
| 194 | H18 | PY  | 0.00000  | -0.00465 | 0.00046  | -0.00008 | 0.00646  |
| 195 | H18 | PZ  | -0.00004 | 0.00000  | 0.00000  | 0.00000  | 0.00000  |
| 196 | C9  | S   | 0.00000  | 0.00245  | 0.00335  | 0.00561  | 0.00515  |
| 197 | C9  | S   | 0.00000  | -0.00663 | -0.00854 | -0.01329 | -0.00970 |
| 198 | C9  | PX  | 0.00000  | 0.03067  | 0.02408  | 0.04930  | -0.08657 |
| 199 | C9  | PY  | 0.00000  | 0.02472  | -0.23187 | 0.14276  | 0.03471  |
| 200 | C9  | PZ  | -0.31445 | 0.00000  | 0.00000  | 0.00000  | 0.00000  |
| 201 | C9  | S   | 0.00000  | 0.00704  | -0.02188 | 0.01224  | -0.02238 |
| 202 | C9  | PX  | 0.00000  | 0.00553  | 0.02415  | 0.00381  | -0.03306 |
| 203 | C9  | PY  | 0.00000  | 0.00290  | -0.10782 | 0.05543  | 0.01463  |
| 204 | C9  | PZ  | -0.12903 | 0.00000  | 0.00000  | 0.00000  | 0.00000  |
| 205 | C9  | DXX | 0.00000  | -0.00249 | 0.00726  | -0.00848 | 0.00461  |
| 206 | C9  | DYY | 0.00000  | -0.00038 | -0.01059 | 0.00530  | 0.00232  |
| 207 | C9  | DZZ | 0.00000  | 0.00170  | 0.00480  | 0.00096  | -0.00614 |
| 208 | C9  | DXY | 0.00000  | -0.00466 | 0.01104  | -0.01184 | 0.00200  |
| 209 | C9  | DXZ | -0.00428 | 0.00000  | 0.00000  | 0.00000  | 0.00000  |
| 210 | C9  | DYZ | 0.01540  | 0.00000  | 0.00000  | 0.00000  | 0.00000  |
| 211 | H3  | S   | 0.00000  | 0.00879  | -0.14637 | 0.07842  | 0.02524  |
| 212 | H3  | S   | 0.00000  | 0.00782  | -0.10136 | 0.06080  | 0.02305  |
| 213 | H3  | PX  | 0.00000  | 0.00039  | -0.00122 | 0.00119  | -0.00077 |
| 214 | H3  | PY  | 0.00000  | -0.00024 | 0.00652  | -0.00314 | -0.00106 |
| 215 | H3  | PZ  | -0.00480 | 0.00000  | 0.00000  | 0.00000  | 0.00000  |
| 216 | H5  | S   | 0.14889  | 0.00619  | 0.03925  | -0.00724 | -0.03672 |
| 217 | H5  | S   | 0.11158  | 0.00611  | 0.02785  | -0.00212 | -0.02704 |
| 218 | H5  | PX  | -0.00577 | 0.00040  | -0.00090 | 0.00125  | 0.00019  |
| 219 | H5  | PY  | 0.00255  | 0.00017  | -0.00244 | 0.00138  | -0.00041 |
| 220 | H5  | PZ  | 0.00469  | 0.00020  | 0.00240  | -0.00075 | -0.00227 |
| 221 | H7  | S   | -0.14889 | 0.00619  | 0.03925  | -0.00724 | -0.03672 |
| 222 | H7  | S   | -0.11158 | 0.00611  | 0.02785  | -0.00212 | -0.02704 |
| 223 | H7  | PX  | 0.00577  | 0.00040  | -0.00090 | 0.00125  | 0.00019  |
| 224 | H7  | PY  | -0.00255 | 0.00017  | -0.00244 | 0.00138  | -0.00041 |
| 225 | H7  | PZ  | 0.00469  | -0.00020 | -0.00240 | 0.00075  | 0.00227  |

MO:

31

32

33

34

35

Eigenvalues:        -0.57233    -0.56064    -0.55923    -0.53266    -0.51654  
                   (ev):        -15.57390   -15.25578   -15.21754   -14.49451   -14.05566

|    |    | A   | A        | A        | A        | A        |          |
|----|----|-----|----------|----------|----------|----------|----------|
| 1  | H1 | S   | 0.04066  | 0.02166  | 0.00000  | 0.01612  | 0.00000  |
| 2  | H1 | S   | 0.03337  | 0.02542  | 0.00000  | 0.00751  | 0.00000  |
| 3  | H1 | PX  | -0.00136 | 0.00013  | 0.00000  | -0.00138 | 0.00000  |
| 4  | H1 | PY  | -0.00070 | -0.00078 | 0.00000  | 0.00018  | 0.00000  |
| 5  | H1 | PZ  | 0.00000  | 0.00000  | 0.00224  | 0.00000  | 0.00123  |
| 6  | C1 | S   | 0.01459  | -0.00550 | 0.00000  | 0.00864  | 0.00000  |
| 7  | C1 | S   | -0.03071 | 0.00835  | 0.00000  | -0.01836 | 0.00000  |
| 8  | C1 | PX  | 0.08661  | 0.03933  | 0.00000  | 0.02380  | 0.00000  |
| 9  | C1 | PY  | 0.00860  | -0.09128 | 0.00000  | 0.08984  | 0.00000  |
| 10 | C1 | PZ  | 0.00000  | 0.00000  | 0.11241  | 0.00000  | 0.08591  |
| 11 | C1 | S   | -0.03155 | 0.04429  | 0.00000  | -0.04476 | 0.00000  |
| 12 | C1 | PX  | 0.03014  | 0.00546  | 0.00000  | 0.01952  | 0.00000  |
| 13 | C1 | PY  | 0.01873  | -0.04365 | 0.00000  | 0.06011  | 0.00000  |
| 14 | C1 | PZ  | 0.00000  | 0.00000  | 0.06295  | 0.00000  | 0.05449  |
| 15 | C1 | DXX | 0.00449  | 0.00273  | 0.00000  | 0.00046  | 0.00000  |
| 16 | C1 | DYY | -0.00431 | -0.00134 | 0.00000  | -0.00149 | 0.00000  |
| 17 | C1 | DZZ | 0.00050  | -0.00068 | 0.00000  | -0.00010 | 0.00000  |
| 18 | C1 | DXY | -0.00297 | 0.00811  | 0.00000  | -0.00398 | 0.00000  |
| 19 | C1 | DXZ | 0.00000  | 0.00000  | -0.00728 | 0.00000  | -0.00831 |
| 20 | C1 | DYZ | 0.00000  | 0.00000  | -0.00255 | 0.00000  | 0.00653  |
| 21 | C2 | S   | -0.00651 | -0.00326 | 0.00000  | 0.00112  | 0.00000  |
| 22 | C2 | S   | 0.01665  | 0.00398  | 0.00000  | 0.00149  | 0.00000  |
| 23 | C2 | PX  | 0.03659  | -0.03078 | 0.00000  | 0.12026  | 0.00000  |
| 24 | C2 | PY  | -0.05283 | -0.22527 | 0.00000  | -0.13517 | 0.00000  |
| 25 | C2 | PZ  | 0.00000  | 0.00000  | 0.12140  | 0.00000  | 0.01884  |
| 26 | C2 | S   | -0.00409 | 0.03703  | 0.00000  | -0.01399 | 0.00000  |
| 27 | C2 | PX  | -0.00288 | -0.00748 | 0.00000  | 0.05935  | 0.00000  |
| 28 | C2 | PY  | -0.02948 | -0.08480 | 0.00000  | -0.05696 | 0.00000  |
| 29 | C2 | PZ  | 0.00000  | 0.00000  | 0.06650  | 0.00000  | 0.01421  |
| 30 | C2 | DXX | 0.00008  | 0.01252  | 0.00000  | 0.00307  | 0.00000  |
| 31 | C2 | DYY | 0.00075  | -0.00921 | 0.00000  | -0.00209 | 0.00000  |
| 32 | C2 | DZZ | 0.00033  | -0.00112 | 0.00000  | 0.00061  | 0.00000  |
| 33 | C2 | DXY | 0.00396  | -0.00428 | 0.00000  | -0.01425 | 0.00000  |
| 34 | C2 | DXZ | 0.00000  | 0.00000  | 0.00814  | 0.00000  | -0.00036 |
| 35 | C2 | DYZ | 0.00000  | 0.00000  | 0.00129  | 0.00000  | 0.00595  |
| 36 | C3 | S   | -0.01603 | 0.01705  | 0.00000  | -0.00527 | 0.00000  |
| 37 | C3 | S   | 0.03403  | -0.03629 | 0.00000  | 0.01069  | 0.00000  |
| 38 | C3 | PX  | 0.23169  | -0.02858 | 0.00000  | 0.01230  | 0.00000  |
| 39 | C3 | PY  | -0.14982 | 0.11103  | 0.00000  | -0.09141 | 0.00000  |
| 40 | C3 | PZ  | 0.00000  | 0.00000  | 0.18426  | 0.00000  | -0.03999 |
| 41 | C3 | S   | 0.00533  | -0.06184 | 0.00000  | 0.02838  | 0.00000  |
| 42 | C3 | PX  | 0.10726  | -0.02247 | 0.00000  | 0.01124  | 0.00000  |
| 43 | C3 | PY  | -0.02204 | 0.03115  | 0.00000  | -0.00909 | 0.00000  |
| 44 | C3 | PZ  | 0.00000  | 0.00000  | 0.10895  | 0.00000  | -0.02610 |
| 45 | C3 | DXX | -0.01131 | -0.00328 | 0.00000  | 0.00651  | 0.00000  |
| 46 | C3 | DYY | 0.00578  | 0.00404  | 0.00000  | -0.00749 | 0.00000  |
| 47 | C3 | DZZ | 0.00005  | 0.00009  | 0.00000  | 0.00011  | 0.00000  |
| 48 | C3 | DXY | -0.01069 | 0.00320  | 0.00000  | -0.00722 | 0.00000  |
| 49 | C3 | DXZ | 0.00000  | 0.00000  | -0.00302 | 0.00000  | 0.00117  |
| 50 | C3 | DYZ | 0.00000  | 0.00000  | -0.00712 | 0.00000  | 0.00822  |

|     |    |     |          |          |          |          |          |
|-----|----|-----|----------|----------|----------|----------|----------|
| 51  | C4 | S   | -0.01829 | 0.01035  | 0.00000  | -0.00822 | 0.00000  |
| 52  | C4 | S   | 0.04460  | -0.02068 | 0.00000  | 0.01936  | 0.00000  |
| 53  | C4 | PX  | -0.16130 | -0.16175 | 0.00000  | 0.08116  | 0.00000  |
| 54  | C4 | PY  | -0.07228 | -0.06828 | 0.00000  | 0.06201  | 0.00000  |
| 55  | C4 | PZ  | 0.00000  | 0.00000  | 0.10870  | 0.00000  | 0.19874  |
| 56  | C4 | S   | 0.04197  | -0.00872 | 0.00000  | -0.00379 | 0.00000  |
| 57  | C4 | PX  | -0.06314 | -0.07348 | 0.00000  | 0.04058  | 0.00000  |
| 58  | C4 | PY  | -0.00641 | -0.01219 | 0.00000  | 0.00964  | 0.00000  |
| 59  | C4 | PZ  | 0.00000  | 0.00000  | 0.06189  | 0.00000  | 0.11993  |
| 60  | C4 | DXX | 0.01233  | 0.01055  | 0.00000  | 0.00137  | 0.00000  |
| 61  | C4 | DYY | -0.01171 | -0.00995 | 0.00000  | -0.00253 | 0.00000  |
| 62  | C4 | DZZ | 0.00098  | 0.00187  | 0.00000  | -0.00103 | 0.00000  |
| 63  | C4 | DXY | 0.01355  | 0.00369  | 0.00000  | 0.00137  | 0.00000  |
| 64  | C4 | DXZ | 0.00000  | 0.00000  | 0.00135  | 0.00000  | 0.00154  |
| 65  | C4 | DYZ | 0.00000  | 0.00000  | -0.00484 | 0.00000  | 0.00936  |
| 66  | C5 | S   | -0.01223 | 0.00577  | 0.00000  | -0.00035 | 0.00000  |
| 67  | C5 | S   | 0.02552  | -0.01204 | 0.00000  | -0.00481 | 0.00000  |
| 68  | C5 | PX  | 0.21234  | 0.11376  | 0.00000  | -0.08685 | 0.00000  |
| 69  | C5 | PY  | -0.01547 | 0.19828  | 0.00000  | 0.14101  | 0.00000  |
| 70  | C5 | PZ  | 0.00000  | 0.00000  | 0.10056  | 0.00000  | 0.07776  |
| 71  | C5 | S   | 0.05167  | -0.00920 | 0.00000  | 0.03710  | 0.00000  |
| 72  | C5 | PX  | 0.09896  | 0.03868  | 0.00000  | -0.04960 | 0.00000  |
| 73  | C5 | PY  | -0.03274 | 0.07049  | 0.00000  | 0.06010  | 0.00000  |
| 74  | C5 | PZ  | 0.00000  | 0.00000  | 0.06193  | 0.00000  | 0.05099  |
| 75  | C5 | DXX | 0.00747  | 0.01091  | 0.00000  | -0.00008 | 0.00000  |
| 76  | C5 | DYY | -0.00532 | -0.00714 | 0.00000  | 0.00365  | 0.00000  |
| 77  | C5 | DZZ | -0.00037 | -0.00035 | 0.00000  | -0.00110 | 0.00000  |
| 78  | C5 | DXY | 0.00873  | -0.00294 | 0.00000  | -0.01280 | 0.00000  |
| 79  | C5 | DXZ | 0.00000  | 0.00000  | 0.00304  | 0.00000  | 0.00591  |
| 80  | C5 | DYZ | 0.00000  | 0.00000  | -0.00664 | 0.00000  | 0.00071  |
| 81  | C6 | S   | 0.02335  | 0.01064  | 0.00000  | -0.00294 | 0.00000  |
| 82  | C6 | S   | -0.05049 | -0.02494 | 0.00000  | 0.00055  | 0.00000  |
| 83  | C6 | PX  | -0.15797 | -0.06450 | 0.00000  | -0.06108 | 0.00000  |
| 84  | C6 | PY  | -0.06518 | 0.14022  | 0.00000  | 0.23011  | 0.00000  |
| 85  | C6 | PZ  | 0.00000  | 0.00000  | 0.23109  | 0.00000  | -0.09462 |
| 86  | C6 | S   | -0.02883 | -0.03142 | 0.00000  | 0.04742  | 0.00000  |
| 87  | C6 | PX  | -0.05509 | -0.02183 | 0.00000  | -0.02895 | 0.00000  |
| 88  | C6 | PY  | -0.03155 | 0.04223  | 0.00000  | 0.06963  | 0.00000  |
| 89  | C6 | PZ  | 0.00000  | 0.00000  | 0.13526  | 0.00000  | -0.05806 |
| 90  | C6 | DXX | -0.00140 | 0.00664  | 0.00000  | 0.01048  | 0.00000  |
| 91  | C6 | DYY | 0.00035  | -0.00543 | 0.00000  | -0.00745 | 0.00000  |
| 92  | C6 | DZZ | 0.00062  | 0.00102  | 0.00000  | 0.00183  | 0.00000  |
| 93  | C6 | DXY | -0.00547 | -0.01106 | 0.00000  | -0.00980 | 0.00000  |
| 94  | C6 | DXZ | 0.00000  | 0.00000  | 0.00405  | 0.00000  | -0.00217 |
| 95  | C6 | DYZ | 0.00000  | 0.00000  | -0.01115 | 0.00000  | 0.01007  |
| 96  | C7 | S   | 0.00216  | -0.00513 | 0.00000  | -0.00188 | 0.00000  |
| 97  | C7 | S   | -0.00176 | 0.01073  | 0.00000  | 0.00321  | 0.00000  |
| 98  | C7 | PX  | -0.23428 | -0.02754 | 0.00000  | 0.01257  | 0.00000  |
| 99  | C7 | PY  | 0.18743  | -0.14480 | 0.00000  | 0.10914  | 0.00000  |
| 100 | C7 | PZ  | 0.00000  | 0.00000  | 0.14676  | 0.00000  | -0.06559 |
| 101 | C7 | S   | -0.00762 | 0.03647  | 0.00000  | 0.02433  | 0.00000  |
| 102 | C7 | PX  | -0.11571 | -0.02435 | 0.00000  | 0.00151  | 0.00000  |
| 103 | C7 | PY  | 0.06761  | -0.04735 | 0.00000  | 0.03407  | 0.00000  |
| 104 | C7 | PZ  | 0.00000  | 0.00000  | 0.08504  | 0.00000  | -0.04196 |

|     |    |     |          |          |          |          |          |
|-----|----|-----|----------|----------|----------|----------|----------|
| 105 | C7 | DXX | -0.01737 | 0.00436  | 0.00000  | 0.00107  | 0.00000  |
| 106 | C7 | DYY | 0.01502  | -0.00241 | 0.00000  | -0.00167 | 0.00000  |
| 107 | C7 | DZZ | 0.00103  | -0.00072 | 0.00000  | 0.00022  | 0.00000  |
| 108 | C7 | DXY | -0.00694 | 0.01202  | 0.00000  | -0.00697 | 0.00000  |
| 109 | C7 | DXZ | 0.00000  | 0.00000  | -0.01161 | 0.00000  | 0.00517  |
| 110 | C7 | DYZ | 0.00000  | 0.00000  | 0.00410  | 0.00000  | 0.00074  |
| 111 | O1 | S   | 0.00879  | -0.00154 | 0.00000  | 0.02192  | 0.00000  |
| 112 | O1 | S   | -0.01860 | 0.00361  | 0.00000  | -0.05224 | 0.00000  |
| 113 | O1 | PX  | 0.11260  | 0.04803  | 0.00000  | 0.14085  | 0.00000  |
| 114 | O1 | PY  | 0.07338  | 0.11186  | 0.00000  | -0.08666 | 0.00000  |
| 115 | O1 | PZ  | 0.00000  | 0.00000  | 0.03953  | 0.00000  | 0.32398  |
| 116 | O1 | S   | -0.04372 | 0.00352  | 0.00000  | -0.08718 | 0.00000  |
| 117 | O1 | PX  | 0.08256  | 0.03338  | 0.00000  | 0.10492  | 0.00000  |
| 118 | O1 | PY  | 0.05250  | 0.08318  | 0.00000  | -0.07372 | 0.00000  |
| 119 | O1 | PZ  | 0.00000  | 0.00000  | 0.02839  | 0.00000  | 0.25348  |
| 120 | O1 | DXX | 0.00974  | 0.00977  | 0.00000  | 0.00235  | 0.00000  |
| 121 | O1 | DYY | -0.00551 | -0.01150 | 0.00000  | 0.00695  | 0.00000  |
| 122 | O1 | DZZ | -0.00060 | 0.00071  | 0.00000  | -0.00493 | 0.00000  |
| 123 | O1 | DXY | 0.00348  | 0.00489  | 0.00000  | -0.00518 | 0.00000  |
| 124 | O1 | DXZ | 0.00000  | 0.00000  | -0.00157 | 0.00000  | 0.00353  |
| 125 | O1 | DYZ | 0.00000  | 0.00000  | -0.00479 | 0.00000  | -0.01659 |
| 126 | H4 | S   | -0.09283 | 0.03431  | 0.00000  | 0.11186  | 0.00000  |
| 127 | H4 | S   | -0.07059 | 0.02911  | 0.00000  | 0.08315  | 0.00000  |
| 128 | H4 | PX  | -0.00219 | 0.00292  | 0.00000  | 0.00326  | 0.00000  |
| 129 | H4 | PY  | 0.00433  | 0.00138  | 0.00000  | -0.00314 | 0.00000  |
| 130 | H4 | PZ  | 0.00000  | 0.00000  | 0.00189  | 0.00000  | 0.00180  |
| 131 | N1 | S   | -0.00766 | 0.00315  | 0.00000  | -0.02493 | 0.00000  |
| 132 | N1 | S   | 0.01924  | -0.00879 | 0.00000  | 0.05666  | 0.00000  |
| 133 | N1 | PX  | -0.10779 | 0.10458  | 0.00000  | 0.01363  | 0.00000  |
| 134 | N1 | PY  | 0.03147  | -0.13595 | 0.00000  | -0.25312 | 0.00000  |
| 135 | N1 | PZ  | 0.00000  | 0.00000  | 0.23856  | 0.00000  | -0.13762 |
| 136 | N1 | S   | 0.00387  | 0.01388  | 0.00000  | 0.09168  | 0.00000  |
| 137 | N1 | PX  | -0.06260 | 0.06300  | 0.00000  | -0.00413 | 0.00000  |
| 138 | N1 | PY  | 0.00436  | -0.06446 | 0.00000  | -0.13757 | 0.00000  |
| 139 | N1 | PZ  | 0.00000  | 0.00000  | 0.15075  | 0.00000  | -0.09338 |
| 140 | N1 | DXX | -0.00706 | 0.01522  | 0.00000  | 0.00864  | 0.00000  |
| 141 | N1 | DYY | 0.00540  | -0.01426 | 0.00000  | -0.01423 | 0.00000  |
| 142 | N1 | DZZ | 0.00191  | -0.00132 | 0.00000  | 0.00283  | 0.00000  |
| 143 | N1 | DXY | -0.00547 | -0.00407 | 0.00000  | -0.01431 | 0.00000  |
| 144 | N1 | DXZ | 0.00000  | 0.00000  | 0.01594  | 0.00000  | -0.00966 |
| 145 | N1 | DYZ | 0.00000  | 0.00000  | 0.01698  | 0.00000  | -0.00806 |
| 146 | H6 | S   | -0.00209 | 0.07041  | 0.00000  | -0.05128 | 0.00000  |
| 147 | H6 | S   | -0.00742 | 0.05763  | 0.00000  | -0.03642 | 0.00000  |
| 148 | H6 | PX  | 0.00007  | 0.00358  | 0.00000  | -0.00164 | 0.00000  |
| 149 | H6 | PY  | -0.00154 | -0.00158 | 0.00000  | -0.00276 | 0.00000  |
| 150 | H6 | PZ  | 0.00000  | 0.00000  | 0.00253  | 0.00000  | 0.00031  |
| 151 | C8 | S   | -0.00921 | -0.01004 | 0.00000  | 0.00733  | 0.00000  |
| 152 | C8 | S   | 0.01765  | 0.02352  | 0.00000  | -0.01555 | 0.00000  |
| 153 | C8 | PX  | 0.06034  | -0.06236 | 0.00000  | -0.13646 | 0.00000  |
| 154 | C8 | PY  | -0.08868 | 0.25146  | 0.00000  | 0.01034  | 0.00000  |
| 155 | C8 | PZ  | 0.00000  | 0.00000  | 0.17383  | 0.00000  | -0.11704 |
| 156 | C8 | S   | 0.00400  | 0.05138  | 0.00000  | -0.01885 | 0.00000  |
| 157 | C8 | PX  | 0.00683  | -0.00820 | 0.00000  | -0.08929 | 0.00000  |
| 158 | C8 | PY  | -0.02742 | 0.05587  | 0.00000  | -0.00779 | 0.00000  |

|     |     |     |          |          |          |          |          |
|-----|-----|-----|----------|----------|----------|----------|----------|
| 159 | C8  | PZ  | 0.00000  | 0.00000  | 0.10041  | 0.00000  | -0.07198 |
| 160 | C8  | DXX | -0.01127 | 0.01652  | 0.00000  | 0.01423  | 0.00000  |
| 161 | C8  | DYY | 0.00879  | -0.01064 | 0.00000  | -0.01385 | 0.00000  |
| 162 | C8  | DZZ | 0.00057  | -0.00183 | 0.00000  | -0.00099 | 0.00000  |
| 163 | C8  | DXY | -0.00184 | 0.00677  | 0.00000  | -0.00689 | 0.00000  |
| 164 | C8  | DXZ | 0.00000  | 0.00000  | -0.00511 | 0.00000  | 0.00305  |
| 165 | C8  | DYZ | 0.00000  | 0.00000  | 0.00415  | 0.00000  | -0.00065 |
| 166 | H8  | S   | -0.16984 | -0.00207 | 0.00000  | 0.00787  | 0.00000  |
| 167 | H8  | S   | -0.13204 | 0.00377  | 0.00000  | 0.01032  | 0.00000  |
| 168 | H8  | PX  | 0.00800  | 0.00038  | 0.00000  | -0.00005 | 0.00000  |
| 169 | H8  | PY  | 0.00219  | -0.00235 | 0.00000  | 0.00156  | 0.00000  |
| 170 | H8  | PZ  | 0.00000  | 0.00000  | 0.00307  | 0.00000  | -0.00135 |
| 171 | C10 | S   | -0.00731 | 0.01534  | 0.00000  | 0.00810  | 0.00000  |
| 172 | C10 | S   | 0.01532  | -0.03248 | 0.00000  | -0.01709 | 0.00000  |
| 173 | C10 | PX  | 0.07475  | 0.05110  | 0.00000  | 0.21538  | 0.00000  |
| 174 | C10 | PY  | 0.13040  | -0.22192 | 0.00000  | -0.00968 | 0.00000  |
| 175 | C10 | PZ  | 0.00000  | 0.00000  | 0.08709  | 0.00000  | -0.06724 |
| 176 | C10 | S   | 0.01645  | -0.04722 | 0.00000  | -0.02362 | 0.00000  |
| 177 | C10 | PX  | 0.03884  | 0.02205  | 0.00000  | 0.12001  | 0.00000  |
| 178 | C10 | PY  | 0.05516  | -0.09712 | 0.00000  | 0.01015  | 0.00000  |
| 179 | C10 | PZ  | 0.00000  | 0.00000  | 0.05071  | 0.00000  | -0.04299 |
| 180 | C10 | DXX | -0.00442 | 0.01177  | 0.00000  | 0.00880  | 0.00000  |
| 181 | C10 | DYY | 0.00208  | -0.00808 | 0.00000  | -0.00712 | 0.00000  |
| 182 | C10 | DZZ | 0.00006  | -0.00001 | 0.00000  | -0.00014 | 0.00000  |
| 183 | C10 | DXY | -0.00684 | 0.00441  | 0.00000  | -0.01439 | 0.00000  |
| 184 | C10 | DXZ | 0.00000  | 0.00000  | -0.00196 | 0.00000  | 0.00143  |
| 185 | C10 | DYZ | 0.00000  | 0.00000  | 0.00938  | 0.00000  | -0.00665 |
| 186 | H16 | S   | 0.02297  | 0.06613  | 0.00000  | 0.13848  | 0.00000  |
| 187 | H16 | S   | 0.01098  | 0.05923  | 0.00000  | 0.11797  | 0.00000  |
| 188 | H16 | PX  | -0.00113 | -0.00304 | 0.00000  | -0.00550 | 0.00000  |
| 189 | H16 | PY  | 0.00216  | -0.00201 | 0.00000  | 0.00232  | 0.00000  |
| 190 | H16 | PZ  | 0.00000  | 0.00000  | 0.00185  | 0.00000  | -0.00143 |
| 191 | H18 | S   | -0.08520 | 0.05870  | 0.00000  | -0.11287 | 0.00000  |
| 192 | H18 | S   | -0.06447 | 0.05088  | 0.00000  | -0.07810 | 0.00000  |
| 193 | H18 | PX  | -0.00358 | 0.00333  | 0.00000  | -0.00349 | 0.00000  |
| 194 | H18 | PY  | -0.00177 | -0.00084 | 0.00000  | -0.00420 | 0.00000  |
| 195 | H18 | PZ  | 0.00000  | 0.00000  | 0.00190  | 0.00000  | -0.00146 |
| 196 | C9  | S   | -0.00163 | -0.00289 | 0.00000  | -0.00125 | 0.00000  |
| 197 | C9  | S   | 0.00514  | 0.00473  | 0.00000  | 0.00553  | 0.00000  |
| 198 | C9  | PX  | -0.05583 | 0.02765  | 0.00000  | -0.12200 | 0.00000  |
| 199 | C9  | PY  | -0.10152 | -0.21429 | 0.00000  | 0.13169  | 0.00000  |
| 200 | C9  | PZ  | 0.00000  | 0.00000  | -0.12387 | 0.00000  | -0.28302 |
| 201 | C9  | S   | -0.01335 | -0.00125 | 0.00000  | -0.00775 | 0.00000  |
| 202 | C9  | PX  | -0.01244 | 0.02102  | 0.00000  | -0.04919 | 0.00000  |
| 203 | C9  | PY  | -0.04501 | -0.10844 | 0.00000  | 0.07342  | 0.00000  |
| 204 | C9  | PZ  | 0.00000  | 0.00000  | -0.05825 | 0.00000  | -0.13154 |
| 205 | C9  | DXX | 0.00860  | 0.01085  | 0.00000  | -0.00302 | 0.00000  |
| 206 | C9  | DYY | -0.00613 | -0.01752 | 0.00000  | 0.01614  | 0.00000  |
| 207 | C9  | DZZ | -0.00138 | 0.00623  | 0.00000  | -0.01088 | 0.00000  |
| 208 | C9  | DXY | 0.00673  | 0.00480  | 0.00000  | 0.00516  | 0.00000  |
| 209 | C9  | DXZ | 0.00000  | 0.00000  | -0.00906 | 0.00000  | -0.03027 |
| 210 | C9  | DYZ | 0.00000  | 0.00000  | 0.00305  | 0.00000  | 0.00408  |
| 211 | H3  | S   | -0.05990 | -0.14589 | 0.00000  | 0.10972  | 0.00000  |
| 212 | H3  | S   | -0.04805 | -0.11726 | 0.00000  | 0.09249  | 0.00000  |



|     |    |    |          |          |          |          |          |
|-----|----|----|----------|----------|----------|----------|----------|
| 213 | H3 | PX | -0.00132 | -0.00122 | 0.00000  | -0.00016 | 0.00000  |
| 214 | H3 | PY | 0.00236  | 0.00591  | 0.00000  | -0.00457 | 0.00000  |
| 215 | H3 | PZ | 0.00000  | 0.00000  | -0.00206 | 0.00000  | -0.00492 |
| 216 | H5 | S  | -0.00023 | 0.04886  | 0.06856  | -0.06616 | 0.17248  |
| 217 | H5 | S  | -0.00051 | 0.04198  | 0.05712  | -0.06193 | 0.16182  |
| 218 | H5 | PX | -0.00075 | -0.00106 | -0.00214 | 0.00016  | -0.00480 |
| 219 | H5 | PY | -0.00149 | -0.00217 | 0.00136  | 0.00078  | 0.00324  |
| 220 | H5 | PZ | 0.00005  | 0.00290  | 0.00190  | -0.00375 | 0.00457  |
| 221 | H7 | S  | -0.00023 | 0.04886  | -0.06856 | -0.06616 | -0.17248 |
| 222 | H7 | S  | -0.00051 | 0.04198  | -0.05712 | -0.06193 | -0.16182 |
| 223 | H7 | PX | -0.00075 | -0.00106 | 0.00214  | 0.00016  | 0.00480  |
| 224 | H7 | PY | -0.00149 | -0.00217 | -0.00136 | 0.00078  | -0.00324 |
| 225 | H7 | PZ | -0.00005 | -0.00290 | 0.00190  | 0.00375  | 0.00457  |

|              |           |           |           |           |           |
|--------------|-----------|-----------|-----------|-----------|-----------|
| MO:          | 36        | 37        | 38        | 39        | 40        |
| Eigenvalues: | -0.50639  | -0.49379  | -0.42839  | -0.41333  | -0.39930  |
| (ev):        | -13.77952 | -13.43683 | -11.65714 | -11.24742 | -10.86560 |

|    |    | A   | A        | A        | A        | A        |          |
|----|----|-----|----------|----------|----------|----------|----------|
| 1  | H1 | S   | -0.02589 | -0.11153 | 0.00000  | 0.06460  | 0.00000  |
| 2  | H1 | S   | -0.03694 | -0.09881 | 0.00000  | 0.06995  | 0.00000  |
| 3  | H1 | PX  | 0.00198  | 0.00337  | 0.00000  | -0.00208 | 0.00000  |
| 4  | H1 | PY  | -0.00312 | 0.00209  | 0.00000  | -0.00037 | 0.00000  |
| 5  | H1 | PZ  | 0.00000  | 0.00000  | -0.00331 | 0.00000  | -0.00580 |
| 6  | C1 | S   | -0.00310 | -0.01853 | 0.00000  | 0.00878  | 0.00000  |
| 7  | C1 | S   | 0.00972  | 0.03815  | 0.00000  | -0.01944 | 0.00000  |
| 8  | C1 | PX  | 0.04148  | -0.18460 | 0.00000  | 0.07912  | 0.00000  |
| 9  | C1 | PY  | -0.21580 | -0.01188 | 0.00000  | 0.04487  | 0.00000  |
| 10 | C1 | PZ  | 0.00000  | 0.00000  | -0.13795 | 0.00000  | -0.23812 |
| 11 | C1 | S   | -0.01783 | 0.06703  | 0.00000  | -0.05137 | 0.00000  |
| 12 | C1 | PX  | 0.02876  | -0.11732 | 0.00000  | 0.04597  | 0.00000  |
| 13 | C1 | PY  | -0.06753 | -0.02635 | 0.00000  | 0.05947  | 0.00000  |
| 14 | C1 | PZ  | 0.00000  | 0.00000  | -0.10950 | 0.00000  | -0.18530 |
| 15 | C1 | DXX | -0.00763 | -0.01040 | 0.00000  | 0.00658  | 0.00000  |
| 16 | C1 | DYY | 0.00996  | 0.00798  | 0.00000  | -0.00712 | 0.00000  |
| 17 | C1 | DZZ | -0.00059 | -0.00034 | 0.00000  | -0.00024 | 0.00000  |
| 18 | C1 | DXY | 0.00549  | -0.01021 | 0.00000  | 0.00841  | 0.00000  |
| 19 | C1 | DXZ | 0.00000  | 0.00000  | 0.00830  | 0.00000  | 0.00889  |
| 20 | C1 | DYZ | 0.00000  | 0.00000  | -0.00166 | 0.00000  | 0.00446  |
| 21 | C2 | S   | -0.00056 | -0.00202 | 0.00000  | 0.01898  | 0.00000  |
| 22 | C2 | S   | 0.00414  | 0.00590  | 0.00000  | -0.03822 | 0.00000  |
| 23 | C2 | PX  | 0.04536  | 0.18199  | 0.00000  | -0.11150 | 0.00000  |
| 24 | C2 | PY  | 0.00123  | 0.00542  | 0.00000  | 0.07809  | 0.00000  |
| 25 | C2 | PZ  | 0.00000  | 0.00000  | -0.22060 | 0.00000  | 0.19298  |
| 26 | C2 | S   | -0.00963 | 0.01018  | 0.00000  | -0.10901 | 0.00000  |
| 27 | C2 | PX  | 0.01685  | 0.12395  | 0.00000  | -0.06783 | 0.00000  |
| 28 | C2 | PY  | -0.00483 | 0.00585  | 0.00000  | 0.02450  | 0.00000  |
| 29 | C2 | PZ  | 0.00000  | 0.00000  | -0.16704 | 0.00000  | 0.14320  |
| 30 | C2 | DXX | -0.00368 | -0.01093 | 0.00000  | 0.00546  | 0.00000  |
| 31 | C2 | DYY | 0.00289  | 0.01039  | 0.00000  | -0.00616 | 0.00000  |
| 32 | C2 | DZZ | 0.00058  | 0.00001  | 0.00000  | 0.00068  | 0.00000  |
| 33 | C2 | DXY | -0.00124 | -0.01475 | 0.00000  | 0.00892  | 0.00000  |
| 34 | C2 | DXZ | 0.00000  | 0.00000  | -0.00846 | 0.00000  | 0.00697  |
| 35 | C2 | DYZ | 0.00000  | 0.00000  | -0.01369 | 0.00000  | 0.00447  |

|    |    |     |          |          |          |          |          |
|----|----|-----|----------|----------|----------|----------|----------|
| 36 | C3 | S   | -0.00120 | -0.00233 | 0.00000  | -0.02013 | 0.00000  |
| 37 | C3 | S   | 0.00119  | 0.00448  | 0.00000  | 0.04055  | 0.00000  |
| 38 | C3 | PX  | 0.07399  | 0.14134  | 0.00000  | -0.21264 | 0.00000  |
| 39 | C3 | PY  | 0.19322  | 0.03215  | 0.00000  | -0.05395 | 0.00000  |
| 40 | C3 | PZ  | 0.00000  | 0.00000  | -0.05267 | 0.00000  | -0.24781 |
| 41 | C3 | S   | 0.01587  | -0.03082 | 0.00000  | 0.11885  | 0.00000  |
| 42 | C3 | PX  | 0.05592  | 0.06233  | 0.00000  | -0.11493 | 0.00000  |
| 43 | C3 | PY  | 0.08986  | 0.02228  | 0.00000  | 0.02323  | 0.00000  |
| 44 | C3 | PZ  | 0.00000  | 0.00000  | -0.04530 | 0.00000  | -0.18030 |
| 45 | C3 | DXX | -0.01285 | -0.01426 | 0.00000  | 0.00758  | 0.00000  |
| 46 | C3 | DYY | 0.01406  | 0.01336  | 0.00000  | -0.00457 | 0.00000  |
| 47 | C3 | DZZ | -0.00018 | 0.00046  | 0.00000  | -0.00023 | 0.00000  |
| 48 | C3 | DXY | 0.00571  | -0.01227 | 0.00000  | 0.00546  | 0.00000  |
| 49 | C3 | DXZ | 0.00000  | 0.00000  | 0.00284  | 0.00000  | -0.01220 |
| 50 | C3 | DYZ | 0.00000  | 0.00000  | -0.00780 | 0.00000  | 0.00127  |
| 51 | C4 | S   | -0.00087 | 0.01738  | 0.00000  | 0.00147  | 0.00000  |
| 52 | C4 | S   | 0.00270  | -0.03919 | 0.00000  | -0.00227 | 0.00000  |
| 53 | C4 | PX  | -0.07401 | 0.20849  | 0.00000  | -0.06244 | 0.00000  |
| 54 | C4 | PY  | 0.15577  | -0.03219 | 0.00000  | 0.01568  | 0.00000  |
| 55 | C4 | PZ  | 0.00000  | 0.00000  | -0.10133 | 0.00000  | -0.09542 |
| 56 | C4 | S   | -0.02465 | -0.05831 | 0.00000  | -0.02101 | 0.00000  |
| 57 | C4 | PX  | -0.00572 | 0.07100  | 0.00000  | -0.03715 | 0.00000  |
| 58 | C4 | PY  | 0.00113  | 0.02807  | 0.00000  | -0.00014 | 0.00000  |
| 59 | C4 | PZ  | 0.00000  | 0.00000  | -0.06501 | 0.00000  | -0.06861 |
| 60 | C4 | DXX | -0.00849 | -0.01052 | 0.00000  | 0.00309  | 0.00000  |
| 61 | C4 | DYY | 0.01304  | 0.00871  | 0.00000  | -0.00317 | 0.00000  |
| 62 | C4 | DZZ | -0.00307 | 0.00099  | 0.00000  | -0.00002 | 0.00000  |
| 63 | C4 | DXY | 0.01691  | -0.01861 | 0.00000  | 0.00470  | 0.00000  |
| 64 | C4 | DXZ | 0.00000  | 0.00000  | 0.00196  | 0.00000  | -0.01495 |
| 65 | C4 | DYZ | 0.00000  | 0.00000  | 0.02356  | 0.00000  | 0.01326  |
| 66 | C5 | S   | -0.01104 | 0.00529  | 0.00000  | -0.00507 | 0.00000  |
| 67 | C5 | S   | 0.02223  | -0.01290 | 0.00000  | 0.00676  | 0.00000  |
| 68 | C5 | PX  | 0.02062  | -0.20312 | 0.00000  | 0.04669  | 0.00000  |
| 69 | C5 | PY  | -0.00461 | -0.02000 | 0.00000  | -0.02053 | 0.00000  |
| 70 | C5 | PZ  | 0.00000  | 0.00000  | -0.23534 | 0.00000  | 0.13043  |
| 71 | C5 | S   | 0.05499  | -0.03530 | 0.00000  | 0.04164  | 0.00000  |
| 72 | C5 | PX  | -0.00060 | -0.10627 | 0.00000  | 0.03840  | 0.00000  |
| 73 | C5 | PY  | 0.00380  | 0.00580  | 0.00000  | -0.04131 | 0.00000  |
| 74 | C5 | PZ  | 0.00000  | 0.00000  | -0.17241 | 0.00000  | 0.10373  |
| 75 | C5 | DXX | -0.00091 | -0.00966 | 0.00000  | 0.00221  | 0.00000  |
| 76 | C5 | DYY | 0.00210  | 0.00857  | 0.00000  | -0.00226 | 0.00000  |
| 77 | C5 | DZZ | -0.00043 | -0.00012 | 0.00000  | -0.00109 | 0.00000  |
| 78 | C5 | DXY | 0.00308  | -0.01677 | 0.00000  | 0.00776  | 0.00000  |
| 79 | C5 | DXZ | 0.00000  | 0.00000  | -0.00291 | 0.00000  | -0.00509 |
| 80 | C5 | DYZ | 0.00000  | 0.00000  | 0.01519  | 0.00000  | -0.01151 |
| 81 | C6 | S   | 0.00920  | 0.01605  | 0.00000  | 0.01984  | 0.00000  |
| 82 | C6 | S   | -0.01972 | -0.03737 | 0.00000  | -0.05634 | 0.00000  |
| 83 | C6 | PX  | -0.11097 | -0.21494 | 0.00000  | 0.16778  | 0.00000  |
| 84 | C6 | PY  | -0.05438 | 0.05338  | 0.00000  | 0.09514  | 0.00000  |
| 85 | C6 | PZ  | 0.00000  | 0.00000  | -0.04713 | 0.00000  | 0.15686  |
| 86 | C6 | S   | -0.02215 | -0.03596 | 0.00000  | 0.03956  | 0.00000  |
| 87 | C6 | PX  | -0.04009 | -0.09489 | 0.00000  | 0.06261  | 0.00000  |
| 88 | C6 | PY  | -0.01190 | -0.01770 | 0.00000  | -0.02026 | 0.00000  |
| 89 | C6 | PZ  | 0.00000  | 0.00000  | -0.02859 | 0.00000  | 0.11016  |

|     |    |     |          |          |          |          |          |
|-----|----|-----|----------|----------|----------|----------|----------|
| 90  | C6 | DXX | -0.00768 | -0.00440 | 0.00000  | 0.01137  | 0.00000  |
| 91  | C6 | DYY | 0.00690  | 0.00360  | 0.00000  | -0.01043 | 0.00000  |
| 92  | C6 | DZZ | -0.00065 | 0.00084  | 0.00000  | 0.00181  | 0.00000  |
| 93  | C6 | DXY | -0.00172 | -0.00280 | 0.00000  | 0.03310  | 0.00000  |
| 94  | C6 | DXZ | 0.00000  | 0.00000  | 0.00412  | 0.00000  | -0.01541 |
| 95  | C6 | DYZ | 0.00000  | 0.00000  | -0.01423 | 0.00000  | -0.01149 |
| 96  | C7 | S   | -0.00043 | -0.02306 | 0.00000  | -0.01279 | 0.00000  |
| 97  | C7 | S   | 0.00540  | 0.05016  | 0.00000  | 0.02577  | 0.00000  |
| 98  | C7 | PX  | -0.09658 | -0.18438 | 0.00000  | -0.06143 | 0.00000  |
| 99  | C7 | PY  | -0.15961 | -0.02947 | 0.00000  | -0.14457 | 0.00000  |
| 100 | C7 | PZ  | 0.00000  | 0.00000  | 0.04953  | 0.00000  | -0.21888 |
| 101 | C7 | S   | -0.00514 | 0.09121  | 0.00000  | 0.09684  | 0.00000  |
| 102 | C7 | PX  | -0.05858 | -0.10228 | 0.00000  | -0.03381 | 0.00000  |
| 103 | C7 | PY  | -0.06707 | -0.01611 | 0.00000  | -0.09782 | 0.00000  |
| 104 | C7 | PZ  | 0.00000  | 0.00000  | 0.03997  | 0.00000  | -0.17271 |
| 105 | C7 | DXX | -0.00628 | -0.01194 | 0.00000  | 0.00280  | 0.00000  |
| 106 | C7 | DYY | 0.00655  | 0.01070  | 0.00000  | 0.00053  | 0.00000  |
| 107 | C7 | DZZ | 0.00038  | -0.00009 | 0.00000  | 0.00025  | 0.00000  |
| 108 | C7 | DXY | 0.01496  | 0.00761  | 0.00000  | 0.00143  | 0.00000  |
| 109 | C7 | DXZ | 0.00000  | 0.00000  | -0.00362 | 0.00000  | 0.01005  |
| 110 | C7 | DYZ | 0.00000  | 0.00000  | -0.00734 | 0.00000  | -0.01124 |
| 111 | O1 | S   | 0.02868  | -0.02215 | 0.00000  | 0.00250  | 0.00000  |
| 112 | O1 | S   | -0.07026 | 0.05219  | 0.00000  | -0.00685 | 0.00000  |
| 113 | O1 | PX  | 0.27489  | -0.18061 | 0.00000  | 0.01936  | 0.00000  |
| 114 | O1 | PY  | -0.22849 | 0.03889  | 0.00000  | -0.00249 | 0.00000  |
| 115 | O1 | PZ  | 0.00000  | 0.00000  | 0.29100  | 0.00000  | 0.11367  |
| 116 | O1 | S   | -0.10269 | 0.08847  | 0.00000  | -0.00686 | 0.00000  |
| 117 | O1 | PX  | 0.21289  | -0.13929 | 0.00000  | 0.01551  | 0.00000  |
| 118 | O1 | PY  | -0.18687 | 0.04229  | 0.00000  | -0.00741 | 0.00000  |
| 119 | O1 | PZ  | 0.00000  | 0.00000  | 0.24980  | 0.00000  | 0.10141  |
| 120 | O1 | DXX | 0.00581  | -0.00785 | 0.00000  | 0.00042  | 0.00000  |
| 121 | O1 | DYY | 0.00904  | -0.00239 | 0.00000  | 0.00057  | 0.00000  |
| 122 | O1 | DZZ | -0.00909 | 0.00448  | 0.00000  | -0.00092 | 0.00000  |
| 123 | O1 | DXY | -0.00832 | -0.00194 | 0.00000  | 0.00128  | 0.00000  |
| 124 | O1 | DXZ | 0.00000  | 0.00000  | 0.00746  | 0.00000  | 0.00246  |
| 125 | O1 | DYZ | 0.00000  | 0.00000  | -0.00584 | 0.00000  | -0.00052 |
| 126 | H4 | S   | -0.00602 | 0.09612  | 0.00000  | -0.03681 | 0.00000  |
| 127 | H4 | S   | -0.03225 | 0.09644  | 0.00000  | -0.03133 | 0.00000  |
| 128 | H4 | PX  | -0.00083 | 0.00188  | 0.00000  | -0.00052 | 0.00000  |
| 129 | H4 | PY  | -0.00069 | -0.00343 | 0.00000  | 0.00073  | 0.00000  |
| 130 | H4 | PZ  | 0.00000  | 0.00000  | -0.00467 | 0.00000  | 0.00299  |
| 131 | N1 | S   | 0.00764  | -0.02227 | 0.00000  | -0.06294 | 0.00000  |
| 132 | N1 | S   | -0.01804 | 0.04936  | 0.00000  | 0.13584  | 0.00000  |
| 133 | N1 | PX  | -0.01908 | -0.16375 | 0.00000  | -0.40913 | 0.00000  |
| 134 | N1 | PY  | 0.08491  | -0.05837 | 0.00000  | -0.22161 | 0.00000  |
| 135 | N1 | PZ  | 0.00000  | 0.00000  | 0.09663  | 0.00000  | 0.21210  |
| 136 | N1 | S   | -0.01938 | 0.07957  | 0.00000  | 0.24386  | 0.00000  |
| 137 | N1 | PX  | -0.00211 | -0.10387 | 0.00000  | -0.32214 | 0.00000  |
| 138 | N1 | PY  | 0.04379  | -0.05054 | 0.00000  | -0.18013 | 0.00000  |
| 139 | N1 | PZ  | 0.00000  | 0.00000  | 0.07260  | 0.00000  | 0.17022  |
| 140 | N1 | DXX | -0.00060 | -0.00620 | 0.00000  | -0.02185 | 0.00000  |
| 141 | N1 | DYY | 0.00160  | -0.00242 | 0.00000  | -0.00646 | 0.00000  |
| 142 | N1 | DZZ | -0.00089 | 0.00379  | 0.00000  | 0.01056  | 0.00000  |
| 143 | N1 | DXY | 0.00234  | -0.01035 | 0.00000  | -0.00989 | 0.00000  |

|     |     |     |          |          |          |          |          |
|-----|-----|-----|----------|----------|----------|----------|----------|
| 144 | N1  | DXZ | 0.00000  | 0.00000  | 0.01029  | 0.00000  | 0.00820  |
| 145 | N1  | DYZ | 0.00000  | 0.00000  | -0.00135 | 0.00000  | 0.01531  |
| 146 | H6  | S   | -0.03105 | -0.12763 | 0.00000  | 0.04963  | 0.00000  |
| 147 | H6  | S   | -0.02997 | -0.09725 | 0.00000  | 0.07588  | 0.00000  |
| 148 | H6  | PX  | -0.00118 | -0.00428 | 0.00000  | 0.00145  | 0.00000  |
| 149 | H6  | PY  | -0.00073 | -0.00252 | 0.00000  | 0.00113  | 0.00000  |
| 150 | H6  | PZ  | 0.00000  | 0.00000  | -0.00447 | 0.00000  | 0.00441  |
| 151 | C8  | S   | -0.02017 | -0.00814 | 0.00000  | 0.02728  | 0.00000  |
| 152 | C8  | S   | 0.04202  | 0.01508  | 0.00000  | -0.06687 | 0.00000  |
| 153 | C8  | PX  | 0.10740  | 0.10309  | 0.00000  | 0.18952  | 0.00000  |
| 154 | C8  | PY  | 0.14664  | 0.09950  | 0.00000  | 0.00175  | 0.00000  |
| 155 | C8  | PZ  | 0.00000  | 0.00000  | 0.20478  | 0.00000  | -0.01817 |
| 156 | C8  | S   | 0.06965  | 0.04263  | 0.00000  | -0.05179 | 0.00000  |
| 157 | C8  | PX  | 0.07069  | 0.04120  | 0.00000  | 0.02986  | 0.00000  |
| 158 | C8  | PY  | 0.05245  | 0.00741  | 0.00000  | -0.02319 | 0.00000  |
| 159 | C8  | PZ  | 0.00000  | 0.00000  | 0.14212  | 0.00000  | -0.00699 |
| 160 | C8  | DXX | -0.00133 | -0.00062 | 0.00000  | 0.00252  | 0.00000  |
| 161 | C8  | DYY | 0.00291  | -0.00013 | 0.00000  | -0.00712 | 0.00000  |
| 162 | C8  | DZZ | -0.00032 | 0.00060  | 0.00000  | 0.00183  | 0.00000  |
| 163 | C8  | DXY | 0.01244  | 0.01602  | 0.00000  | 0.02389  | 0.00000  |
| 164 | C8  | DXZ | 0.00000  | 0.00000  | -0.00024 | 0.00000  | -0.01443 |
| 165 | C8  | DYZ | 0.00000  | 0.00000  | -0.00719 | 0.00000  | -0.00194 |
| 166 | H8  | S   | -0.06280 | -0.10831 | 0.00000  | -0.01887 | 0.00000  |
| 167 | H8  | S   | -0.05322 | -0.10528 | 0.00000  | -0.02476 | 0.00000  |
| 168 | H8  | PX  | 0.00231  | 0.00400  | 0.00000  | 0.00144  | 0.00000  |
| 169 | H8  | PY  | -0.00238 | -0.00103 | 0.00000  | -0.00251 | 0.00000  |
| 170 | H8  | PZ  | 0.00000  | 0.00000  | 0.00101  | 0.00000  | -0.00511 |
| 171 | C10 | S   | 0.00692  | 0.00711  | 0.00000  | 0.00836  | 0.00000  |
| 172 | C10 | S   | -0.01491 | -0.01490 | 0.00000  | -0.01930 | 0.00000  |
| 173 | C10 | PX  | -0.09582 | -0.02588 | 0.00000  | -0.01723 | 0.00000  |
| 174 | C10 | PY  | -0.10031 | -0.06729 | 0.00000  | -0.02924 | 0.00000  |
| 175 | C10 | PZ  | 0.00000  | 0.00000  | 0.16060  | 0.00000  | -0.01725 |
| 176 | C10 | S   | -0.01748 | -0.04217 | 0.00000  | -0.05445 | 0.00000  |
| 177 | C10 | PX  | -0.06122 | -0.01516 | 0.00000  | -0.00022 | 0.00000  |
| 178 | C10 | PY  | -0.05487 | -0.03967 | 0.00000  | -0.00078 | 0.00000  |
| 179 | C10 | PZ  | 0.00000  | 0.00000  | 0.12153  | 0.00000  | -0.01554 |
| 180 | C10 | DXX | -0.00052 | 0.00028  | 0.00000  | -0.00165 | 0.00000  |
| 181 | C10 | DYY | 0.00151  | 0.00059  | 0.00000  | 0.00329  | 0.00000  |
| 182 | C10 | DZZ | 0.00030  | 0.00018  | 0.00000  | -0.00045 | 0.00000  |
| 183 | C10 | DXY | 0.01215  | 0.00705  | 0.00000  | 0.00837  | 0.00000  |
| 184 | C10 | DXZ | 0.00000  | 0.00000  | -0.00259 | 0.00000  | -0.00119 |
| 185 | C10 | DYZ | 0.00000  | 0.00000  | 0.01315  | 0.00000  | -0.00168 |
| 186 | H16 | S   | -0.05338 | -0.01414 | 0.00000  | -0.02113 | 0.00000  |
| 187 | H16 | S   | -0.04549 | -0.01374 | 0.00000  | -0.01911 | 0.00000  |
| 188 | H16 | PX  | 0.00184  | 0.00001  | 0.00000  | -0.00002 | 0.00000  |
| 189 | H16 | PY  | -0.00241 | -0.00121 | 0.00000  | -0.00032 | 0.00000  |
| 190 | H16 | PZ  | 0.00000  | 0.00000  | 0.00354  | 0.00000  | -0.00059 |
| 191 | H18 | S   | 0.09160  | 0.04198  | 0.00000  | 0.02638  | 0.00000  |
| 192 | H18 | S   | 0.07419  | 0.04471  | 0.00000  | 0.06381  | 0.00000  |
| 193 | H18 | PX  | 0.00330  | 0.00121  | 0.00000  | -0.00015 | 0.00000  |
| 194 | H18 | PY  | 0.00162  | 0.00068  | 0.00000  | 0.00120  | 0.00000  |
| 195 | H18 | PZ  | 0.00000  | 0.00000  | 0.00347  | 0.00000  | -0.00008 |
| 196 | C9  | S   | -0.00985 | 0.00514  | 0.00000  | 0.00052  | 0.00000  |
| 197 | C9  | S   | 0.02521  | -0.01368 | 0.00000  | -0.00037 | 0.00000  |

|     |    |     |          |          |          |          |          |
|-----|----|-----|----------|----------|----------|----------|----------|
| 198 | C9 | PX  | -0.15200 | 0.12712  | 0.00000  | -0.02082 | 0.00000  |
| 199 | C9 | PY  | 0.11852  | -0.02805 | 0.00000  | 0.00633  | 0.00000  |
| 200 | C9 | PZ  | 0.00000  | 0.00000  | -0.08512 | 0.00000  | -0.01142 |
| 201 | C9 | S   | 0.00800  | 0.00112  | 0.00000  | -0.00306 | 0.00000  |
| 202 | C9 | PX  | -0.05535 | 0.04860  | 0.00000  | -0.01054 | 0.00000  |
| 203 | C9 | PY  | 0.07529  | -0.01766 | 0.00000  | 0.00356  | 0.00000  |
| 204 | C9 | PZ  | 0.00000  | 0.00000  | -0.02852 | 0.00000  | 0.00720  |
| 205 | C9 | DXX | -0.00461 | -0.00236 | 0.00000  | 0.00036  | 0.00000  |
| 206 | C9 | DYY | 0.02049  | -0.00804 | 0.00000  | 0.00164  | 0.00000  |
| 207 | C9 | DZZ | -0.01288 | 0.00876  | 0.00000  | -0.00145 | 0.00000  |
| 208 | C9 | DXY | 0.01160  | -0.00791 | 0.00000  | 0.00062  | 0.00000  |
| 209 | C9 | DXZ | 0.00000  | 0.00000  | -0.01782 | 0.00000  | -0.00573 |
| 210 | C9 | DYZ | 0.00000  | 0.00000  | -0.00080 | 0.00000  | -0.00043 |
| 211 | H3 | S   | 0.11986  | -0.04371 | 0.00000  | 0.00787  | 0.00000  |
| 212 | H3 | S   | 0.10113  | -0.03898 | 0.00000  | 0.00798  | 0.00000  |
| 213 | H3 | PX  | -0.00020 | 0.00103  | 0.00000  | -0.00024 | 0.00000  |
| 214 | H3 | PY  | -0.00519 | 0.00206  | 0.00000  | -0.00025 | 0.00000  |
| 215 | H3 | PZ  | 0.00000  | 0.00000  | -0.00170 | 0.00000  | -0.00032 |
| 216 | H5 | S   | -0.07307 | 0.04665  | 0.06815  | -0.00830 | 0.01620  |
| 217 | H5 | S   | -0.07698 | 0.04645  | 0.08774  | -0.00746 | 0.03569  |
| 218 | H5 | PX  | -0.00059 | 0.00051  | -0.00141 | 0.00004  | -0.00044 |
| 219 | H5 | PY  | 0.00095  | 0.00052  | 0.00096  | -0.00035 | -0.00020 |
| 220 | H5 | PZ  | -0.00381 | 0.00252  | 0.00165  | -0.00046 | 0.00044  |
| 221 | H7 | S   | -0.07307 | 0.04665  | -0.06815 | -0.00830 | -0.01620 |
| 222 | H7 | S   | -0.07698 | 0.04645  | -0.08774 | -0.00746 | -0.03569 |
| 223 | H7 | PX  | -0.00059 | 0.00051  | 0.00141  | 0.00004  | 0.00044  |
| 224 | H7 | PY  | 0.00095  | 0.00052  | -0.00096 | -0.00035 | 0.00020  |
| 225 | H7 | PZ  | 0.00381  | -0.00252 | 0.00165  | 0.00046  | 0.00044  |

|              |          |          |         |         |         |
|--------------|----------|----------|---------|---------|---------|
| MO:          | 41       | 42       | 43      | 44      | 45      |
| Eigenvalues: | -0.32668 | -0.28259 | 0.04162 | 0.17416 | 0.20872 |
| (ev):        | -8.88935 | -7.68968 | 1.13250 | 4.73911 | 5.67969 |

|    |    | A   | A        | A        | A        | A       |
|----|----|-----|----------|----------|----------|---------|
| 1  | H1 | S   | 0.00000  | 0.00000  | 0.00000  | 0.00000 |
| 2  | H1 | S   | 0.00000  | 0.00000  | 0.00000  | 0.00000 |
| 3  | H1 | PX  | 0.00000  | 0.00000  | 0.00000  | 0.00000 |
| 4  | H1 | PY  | 0.00000  | 0.00000  | 0.00000  | 0.00000 |
| 5  | H1 | PZ  | 0.00027  | -0.00692 | 0.00366  | 0.01010 |
| 6  | C1 | S   | 0.00000  | 0.00000  | 0.00000  | 0.00000 |
| 7  | C1 | S   | 0.00000  | 0.00000  | 0.00000  | 0.00000 |
| 8  | C1 | PX  | 0.00000  | 0.00000  | 0.00000  | 0.00000 |
| 9  | C1 | PY  | 0.00000  | 0.00000  | 0.00000  | 0.00000 |
| 10 | C1 | PZ  | 0.00513  | -0.26612 | 0.11129  | 0.21402 |
| 11 | C1 | S   | 0.00000  | 0.00000  | 0.00000  | 0.00000 |
| 12 | C1 | PX  | 0.00000  | 0.00000  | 0.00000  | 0.00000 |
| 13 | C1 | PY  | 0.00000  | 0.00000  | 0.00000  | 0.00000 |
| 14 | C1 | PZ  | -0.00684 | -0.25860 | 0.15890  | 0.42522 |
| 15 | C1 | DXX | 0.00000  | 0.00000  | 0.00000  | 0.00000 |
| 16 | C1 | DYY | 0.00000  | 0.00000  | 0.00000  | 0.00000 |
| 17 | C1 | DZZ | 0.00000  | 0.00000  | 0.00000  | 0.00000 |
| 18 | C1 | DXY | 0.00000  | 0.00000  | 0.00000  | 0.00000 |
| 19 | C1 | DXZ | 0.00263  | 0.01395  | 0.00334  | 0.00782 |
| 20 | C1 | DYZ | -0.00741 | -0.01552 | -0.01204 | 0.01153 |

|    |    |     |          |          |          |          |          |
|----|----|-----|----------|----------|----------|----------|----------|
| 21 | C2 | S   | 0.00000  | 0.00000  | 0.00000  | 0.00000  | 0.00000  |
| 22 | C2 | S   | 0.00000  | 0.00000  | 0.00000  | 0.00000  | 0.00000  |
| 23 | C2 | PX  | 0.00000  | 0.00000  | 0.00000  | 0.00000  | 0.00000  |
| 24 | C2 | PY  | 0.00000  | 0.00000  | 0.00000  | 0.00000  | 0.00000  |
| 25 | C2 | PZ  | -0.11942 | 0.17099  | 0.14818  | 0.29353  | 0.02086  |
| 26 | C2 | S   | 0.00000  | 0.00000  | 0.00000  | 0.00000  | 0.00000  |
| 27 | C2 | PX  | 0.00000  | 0.00000  | 0.00000  | 0.00000  | 0.00000  |
| 28 | C2 | PY  | 0.00000  | 0.00000  | 0.00000  | 0.00000  | 0.00000  |
| 29 | C2 | PZ  | -0.10910 | 0.14903  | 0.22670  | 0.54919  | 0.04792  |
| 30 | C2 | DXX | 0.00000  | 0.00000  | 0.00000  | 0.00000  | 0.00000  |
| 31 | C2 | DYY | 0.00000  | 0.00000  | 0.00000  | 0.00000  | 0.00000  |
| 32 | C2 | DZZ | 0.00000  | 0.00000  | 0.00000  | 0.00000  | 0.00000  |
| 33 | C2 | DXY | 0.00000  | 0.00000  | 0.00000  | 0.00000  | 0.00000  |
| 34 | C2 | DXZ | 0.00070  | 0.00344  | 0.00713  | -0.00840 | 0.01159  |
| 35 | C2 | DYZ | -0.01817 | 0.00847  | -0.01507 | -0.00783 | -0.02714 |
| 36 | C3 | S   | 0.00000  | 0.00000  | 0.00000  | 0.00000  | 0.00000  |
| 37 | C3 | S   | 0.00000  | 0.00000  | 0.00000  | 0.00000  | 0.00000  |
| 38 | C3 | PX  | 0.00000  | 0.00000  | 0.00000  | 0.00000  | 0.00000  |
| 39 | C3 | PY  | 0.00000  | 0.00000  | 0.00000  | 0.00000  | 0.00000  |
| 40 | C3 | PZ  | 0.13961  | 0.16922  | 0.12553  | -0.21038 | -0.18417 |
| 41 | C3 | S   | 0.00000  | 0.00000  | 0.00000  | 0.00000  | 0.00000  |
| 42 | C3 | PX  | 0.00000  | 0.00000  | 0.00000  | 0.00000  | 0.00000  |
| 43 | C3 | PY  | 0.00000  | 0.00000  | 0.00000  | 0.00000  | 0.00000  |
| 44 | C3 | PZ  | 0.11812  | 0.16547  | 0.15524  | -0.38075 | -0.36087 |
| 45 | C3 | DXX | 0.00000  | 0.00000  | 0.00000  | 0.00000  | 0.00000  |
| 46 | C3 | DYY | 0.00000  | 0.00000  | 0.00000  | 0.00000  | 0.00000  |
| 47 | C3 | DZZ | 0.00000  | 0.00000  | 0.00000  | 0.00000  | 0.00000  |
| 48 | C3 | DXY | 0.00000  | 0.00000  | 0.00000  | 0.00000  | 0.00000  |
| 49 | C3 | DXZ | -0.00581 | 0.00727  | -0.01383 | 0.01423  | -0.01313 |
| 50 | C3 | DYZ | -0.00461 | -0.02533 | 0.01634  | 0.00929  | -0.02113 |
| 51 | C4 | S   | 0.00000  | 0.00000  | 0.00000  | 0.00000  | 0.00000  |
| 52 | C4 | S   | 0.00000  | 0.00000  | 0.00000  | 0.00000  | 0.00000  |
| 53 | C4 | PX  | 0.00000  | 0.00000  | 0.00000  | 0.00000  | 0.00000  |
| 54 | C4 | PY  | 0.00000  | 0.00000  | 0.00000  | 0.00000  | 0.00000  |
| 55 | C4 | PZ  | -0.08024 | -0.22400 | -0.16130 | -0.08844 | 0.34258  |
| 56 | C4 | S   | 0.00000  | 0.00000  | 0.00000  | 0.00000  | 0.00000  |
| 57 | C4 | PX  | 0.00000  | 0.00000  | 0.00000  | 0.00000  | 0.00000  |
| 58 | C4 | PY  | 0.00000  | 0.00000  | 0.00000  | 0.00000  | 0.00000  |
| 59 | C4 | PZ  | -0.05219 | -0.19200 | -0.17043 | -0.16732 | 0.58402  |
| 60 | C4 | DXX | 0.00000  | 0.00000  | 0.00000  | 0.00000  | 0.00000  |
| 61 | C4 | DYY | 0.00000  | 0.00000  | 0.00000  | 0.00000  | 0.00000  |
| 62 | C4 | DZZ | 0.00000  | 0.00000  | 0.00000  | 0.00000  | 0.00000  |
| 63 | C4 | DXY | 0.00000  | 0.00000  | 0.00000  | 0.00000  | 0.00000  |
| 64 | C4 | DXZ | 0.00756  | -0.01753 | 0.01479  | 0.02904  | 0.00401  |
| 65 | C4 | DYZ | 0.00778  | 0.01829  | 0.00149  | -0.00121 | 0.00332  |
| 66 | C5 | S   | 0.00000  | 0.00000  | 0.00000  | 0.00000  | 0.00000  |
| 67 | C5 | S   | 0.00000  | 0.00000  | 0.00000  | 0.00000  | 0.00000  |
| 68 | C5 | PX  | 0.00000  | 0.00000  | 0.00000  | 0.00000  | 0.00000  |
| 69 | C5 | PY  | 0.00000  | 0.00000  | 0.00000  | 0.00000  | 0.00000  |
| 70 | C5 | PZ  | -0.20954 | 0.09769  | -0.18409 | -0.19910 | -0.20184 |
| 71 | C5 | S   | 0.00000  | 0.00000  | 0.00000  | 0.00000  | 0.00000  |
| 72 | C5 | PX  | 0.00000  | 0.00000  | 0.00000  | 0.00000  | 0.00000  |
| 73 | C5 | PY  | 0.00000  | 0.00000  | 0.00000  | 0.00000  | 0.00000  |
| 74 | C5 | PZ  | -0.17959 | 0.10648  | -0.25284 | -0.41246 | -0.40746 |

|     |    |     |          |          |          |          |          |
|-----|----|-----|----------|----------|----------|----------|----------|
| 75  | C5 | DXX | 0.00000  | 0.00000  | 0.00000  | 0.00000  | 0.00000  |
| 76  | C5 | DYY | 0.00000  | 0.00000  | 0.00000  | 0.00000  | 0.00000  |
| 77  | C5 | DZZ | 0.00000  | 0.00000  | 0.00000  | 0.00000  | 0.00000  |
| 78  | C5 | DXY | 0.00000  | 0.00000  | 0.00000  | 0.00000  | 0.00000  |
| 79  | C5 | DXZ | -0.00191 | -0.01026 | -0.00887 | -0.01403 | 0.02083  |
| 80  | C5 | DYZ | 0.00848  | -0.01222 | -0.01149 | -0.02125 | 0.00585  |
| 81  | C6 | S   | 0.00000  | 0.00000  | 0.00000  | 0.00000  | 0.00000  |
| 82  | C6 | S   | 0.00000  | 0.00000  | 0.00000  | 0.00000  | 0.00000  |
| 83  | C6 | PX  | 0.00000  | 0.00000  | 0.00000  | 0.00000  | 0.00000  |
| 84  | C6 | PY  | 0.00000  | 0.00000  | 0.00000  | 0.00000  | 0.00000  |
| 85  | C6 | PZ  | 0.21093  | -0.01530 | 0.17335  | -0.12048 | 0.25817  |
| 86  | C6 | S   | 0.00000  | 0.00000  | 0.00000  | 0.00000  | 0.00000  |
| 87  | C6 | PX  | 0.00000  | 0.00000  | 0.00000  | 0.00000  | 0.00000  |
| 88  | C6 | PY  | 0.00000  | 0.00000  | 0.00000  | 0.00000  | 0.00000  |
| 89  | C6 | PZ  | 0.17581  | -0.02564 | 0.17898  | -0.18729 | 0.46859  |
| 90  | C6 | DXX | 0.00000  | 0.00000  | 0.00000  | 0.00000  | 0.00000  |
| 91  | C6 | DYY | 0.00000  | 0.00000  | 0.00000  | 0.00000  | 0.00000  |
| 92  | C6 | DZZ | 0.00000  | 0.00000  | 0.00000  | 0.00000  | 0.00000  |
| 93  | C6 | DXY | 0.00000  | 0.00000  | 0.00000  | 0.00000  | 0.00000  |
| 94  | C6 | DXZ | 0.00706  | 0.00432  | -0.00204 | -0.02435 | -0.00940 |
| 95  | C6 | DYZ | -0.01503 | 0.02087  | 0.02387  | 0.00433  | 0.00987  |
| 96  | C7 | S   | 0.00000  | 0.00000  | 0.00000  | 0.00000  | 0.00000  |
| 97  | C7 | S   | 0.00000  | 0.00000  | 0.00000  | 0.00000  | 0.00000  |
| 98  | C7 | PX  | 0.00000  | 0.00000  | 0.00000  | 0.00000  | 0.00000  |
| 99  | C7 | PY  | 0.00000  | 0.00000  | 0.00000  | 0.00000  | 0.00000  |
| 100 | C7 | PZ  | -0.00309 | 0.27311  | -0.21089 | 0.09618  | 0.15049  |
| 101 | C7 | S   | 0.00000  | 0.00000  | 0.00000  | 0.00000  | 0.00000  |
| 102 | C7 | PX  | 0.00000  | 0.00000  | 0.00000  | 0.00000  | 0.00000  |
| 103 | C7 | PY  | 0.00000  | 0.00000  | 0.00000  | 0.00000  | 0.00000  |
| 104 | C7 | PZ  | -0.00479 | 0.25381  | -0.26918 | 0.21400  | 0.31348  |
| 105 | C7 | DXX | 0.00000  | 0.00000  | 0.00000  | 0.00000  | 0.00000  |
| 106 | C7 | DYY | 0.00000  | 0.00000  | 0.00000  | 0.00000  | 0.00000  |
| 107 | C7 | DZZ | 0.00000  | 0.00000  | 0.00000  | 0.00000  | 0.00000  |
| 108 | C7 | DXY | 0.00000  | 0.00000  | 0.00000  | 0.00000  | 0.00000  |
| 109 | C7 | DXZ | -0.00125 | -0.00977 | 0.00279  | 0.00355  | 0.00334  |
| 110 | C7 | DYZ | 0.01474  | 0.01023  | 0.00682  | -0.01767 | -0.01250 |
| 111 | O1 | S   | 0.00000  | 0.00000  | 0.00000  | 0.00000  | 0.00000  |
| 112 | O1 | S   | 0.00000  | 0.00000  | 0.00000  | 0.00000  | 0.00000  |
| 113 | O1 | PX  | 0.00000  | 0.00000  | 0.00000  | 0.00000  | 0.00000  |
| 114 | O1 | PY  | 0.00000  | 0.00000  | 0.00000  | 0.00000  | 0.00000  |
| 115 | O1 | PZ  | 0.09876  | 0.16033  | 0.08997  | 0.06019  | -0.11936 |
| 116 | O1 | S   | 0.00000  | 0.00000  | 0.00000  | 0.00000  | 0.00000  |
| 117 | O1 | PX  | 0.00000  | 0.00000  | 0.00000  | 0.00000  | 0.00000  |
| 118 | O1 | PY  | 0.00000  | 0.00000  | 0.00000  | 0.00000  | 0.00000  |
| 119 | O1 | PZ  | 0.08931  | 0.15819  | 0.09326  | 0.08020  | -0.16892 |
| 120 | O1 | DXX | 0.00000  | 0.00000  | 0.00000  | 0.00000  | 0.00000  |
| 121 | O1 | DYY | 0.00000  | 0.00000  | 0.00000  | 0.00000  | 0.00000  |
| 122 | O1 | DZZ | 0.00000  | 0.00000  | 0.00000  | 0.00000  | 0.00000  |
| 123 | O1 | DXY | 0.00000  | 0.00000  | 0.00000  | 0.00000  | 0.00000  |
| 124 | O1 | DXZ | 0.00345  | 0.00396  | 0.00526  | 0.00748  | -0.00390 |
| 125 | O1 | DYZ | -0.00001 | 0.00293  | 0.00572  | 0.00300  | -0.01615 |
| 126 | H4 | S   | 0.00000  | 0.00000  | 0.00000  | 0.00000  | 0.00000  |
| 127 | H4 | S   | 0.00000  | 0.00000  | 0.00000  | 0.00000  | 0.00000  |
| 128 | H4 | PX  | 0.00000  | 0.00000  | 0.00000  | 0.00000  | 0.00000  |

|     |     |     |          |          |          |          |          |
|-----|-----|-----|----------|----------|----------|----------|----------|
| 129 | H4  | PY  | 0.00000  | 0.00000  | 0.00000  | 0.00000  | 0.00000  |
| 130 | H4  | PZ  | -0.00478 | 0.00240  | -0.00617 | -0.00811 | -0.00938 |
| 131 | N1  | S   | 0.00000  | 0.00000  | 0.00000  | 0.00000  | 0.00000  |
| 132 | N1  | S   | 0.00000  | 0.00000  | 0.00000  | 0.00000  | 0.00000  |
| 133 | N1  | PX  | 0.00000  | 0.00000  | 0.00000  | 0.00000  | 0.00000  |
| 134 | N1  | PY  | 0.00000  | 0.00000  | 0.00000  | 0.00000  | 0.00000  |
| 135 | N1  | PZ  | 0.16889  | -0.22253 | -0.19390 | 0.00111  | -0.18178 |
| 136 | N1  | S   | 0.00000  | 0.00000  | 0.00000  | 0.00000  | 0.00000  |
| 137 | N1  | PX  | 0.00000  | 0.00000  | 0.00000  | 0.00000  | 0.00000  |
| 138 | N1  | PY  | 0.00000  | 0.00000  | 0.00000  | 0.00000  | 0.00000  |
| 139 | N1  | PZ  | 0.15004  | -0.20173 | -0.21764 | 0.01862  | -0.30439 |
| 140 | N1  | DXX | 0.00000  | 0.00000  | 0.00000  | 0.00000  | 0.00000  |
| 141 | N1  | DYY | 0.00000  | 0.00000  | 0.00000  | 0.00000  | 0.00000  |
| 142 | N1  | DZZ | 0.00000  | 0.00000  | 0.00000  | 0.00000  | 0.00000  |
| 143 | N1  | DXY | 0.00000  | 0.00000  | 0.00000  | 0.00000  | 0.00000  |
| 144 | N1  | DXZ | 0.00175  | -0.01066 | -0.01315 | 0.00351  | -0.01200 |
| 145 | N1  | DYZ | 0.02184  | -0.00769 | 0.00163  | -0.00817 | 0.01206  |
| 146 | H6  | S   | 0.00000  | 0.00000  | 0.00000  | 0.00000  | 0.00000  |
| 147 | H6  | S   | 0.00000  | 0.00000  | 0.00000  | 0.00000  | 0.00000  |
| 148 | H6  | PX  | 0.00000  | 0.00000  | 0.00000  | 0.00000  | 0.00000  |
| 149 | H6  | PY  | 0.00000  | 0.00000  | 0.00000  | 0.00000  | 0.00000  |
| 150 | H6  | PZ  | -0.00259 | 0.00424  | 0.00436  | 0.01246  | 0.00053  |
| 151 | C8  | S   | 0.00000  | 0.00000  | 0.00000  | 0.00000  | 0.00000  |
| 152 | C8  | S   | 0.00000  | 0.00000  | 0.00000  | 0.00000  | 0.00000  |
| 153 | C8  | PX  | 0.00000  | 0.00000  | 0.00000  | 0.00000  | 0.00000  |
| 154 | C8  | PY  | 0.00000  | 0.00000  | 0.00000  | 0.00000  | 0.00000  |
| 155 | C8  | PZ  | -0.24885 | -0.03916 | -0.08851 | 0.17224  | -0.04798 |
| 156 | C8  | S   | 0.00000  | 0.00000  | 0.00000  | 0.00000  | 0.00000  |
| 157 | C8  | PX  | 0.00000  | 0.00000  | 0.00000  | 0.00000  | 0.00000  |
| 158 | C8  | PY  | 0.00000  | 0.00000  | 0.00000  | 0.00000  | 0.00000  |
| 159 | C8  | PZ  | -0.19579 | -0.04032 | -0.13599 | 0.23399  | -0.07956 |
| 160 | C8  | DXX | 0.00000  | 0.00000  | 0.00000  | 0.00000  | 0.00000  |
| 161 | C8  | DYY | 0.00000  | 0.00000  | 0.00000  | 0.00000  | 0.00000  |
| 162 | C8  | DZZ | 0.00000  | 0.00000  | 0.00000  | 0.00000  | 0.00000  |
| 163 | C8  | DXY | 0.00000  | 0.00000  | 0.00000  | 0.00000  | 0.00000  |
| 164 | C8  | DXZ | -0.01301 | 0.01692  | 0.00655  | 0.00418  | 0.02098  |
| 165 | C8  | DYZ | 0.02377  | 0.00932  | -0.02649 | 0.01025  | 0.00357  |
| 166 | H8  | S   | 0.00000  | 0.00000  | 0.00000  | 0.00000  | 0.00000  |
| 167 | H8  | S   | 0.00000  | 0.00000  | 0.00000  | 0.00000  | 0.00000  |
| 168 | H8  | PX  | 0.00000  | 0.00000  | 0.00000  | 0.00000  | 0.00000  |
| 169 | H8  | PY  | 0.00000  | 0.00000  | 0.00000  | 0.00000  | 0.00000  |
| 170 | H8  | PZ  | -0.00036 | 0.00699  | -0.00733 | 0.00449  | 0.00718  |
| 171 | C10 | S   | 0.00000  | 0.00000  | 0.00000  | 0.00000  | 0.00000  |
| 172 | C10 | S   | 0.00000  | 0.00000  | 0.00000  | 0.00000  | 0.00000  |
| 173 | C10 | PX  | 0.00000  | 0.00000  | 0.00000  | 0.00000  | 0.00000  |
| 174 | C10 | PY  | 0.00000  | 0.00000  | 0.00000  | 0.00000  | 0.00000  |
| 175 | C10 | PZ  | -0.29828 | -0.05634 | 0.26317  | -0.16804 | 0.03159  |
| 176 | C10 | S   | 0.00000  | 0.00000  | 0.00000  | 0.00000  | 0.00000  |
| 177 | C10 | PX  | 0.00000  | 0.00000  | 0.00000  | 0.00000  | 0.00000  |
| 178 | C10 | PY  | 0.00000  | 0.00000  | 0.00000  | 0.00000  | 0.00000  |
| 179 | C10 | PZ  | -0.26390 | -0.05066 | 0.37306  | -0.30374 | 0.07443  |
| 180 | C10 | DXX | 0.00000  | 0.00000  | 0.00000  | 0.00000  | 0.00000  |
| 181 | C10 | DYY | 0.00000  | 0.00000  | 0.00000  | 0.00000  | 0.00000  |
| 182 | C10 | DZZ | 0.00000  | 0.00000  | 0.00000  | 0.00000  | 0.00000  |



|     |     |     |          |          |          |          |          |
|-----|-----|-----|----------|----------|----------|----------|----------|
| 183 | C10 | DXY | 0.00000  | 0.00000  | 0.00000  | 0.00000  | 0.00000  |
| 184 | C10 | DXZ | 0.00259  | 0.00281  | 0.00098  | -0.00145 | 0.00575  |
| 185 | C10 | DYZ | -0.01893 | -0.00256 | -0.00244 | 0.01199  | -0.00231 |
| 186 | H16 | S   | 0.00000  | 0.00000  | 0.00000  | 0.00000  | 0.00000  |
| 187 | H16 | S   | 0.00000  | 0.00000  | 0.00000  | 0.00000  | 0.00000  |
| 188 | H16 | PX  | 0.00000  | 0.00000  | 0.00000  | 0.00000  | 0.00000  |
| 189 | H16 | PY  | 0.00000  | 0.00000  | 0.00000  | 0.00000  | 0.00000  |
| 190 | H16 | PZ  | -0.00710 | -0.00102 | 0.00867  | -0.00722 | 0.00243  |
| 191 | H18 | S   | 0.00000  | 0.00000  | 0.00000  | 0.00000  | 0.00000  |
| 192 | H18 | S   | 0.00000  | 0.00000  | 0.00000  | 0.00000  | 0.00000  |
| 193 | H18 | PX  | 0.00000  | 0.00000  | 0.00000  | 0.00000  | 0.00000  |
| 194 | H18 | PY  | 0.00000  | 0.00000  | 0.00000  | 0.00000  | 0.00000  |
| 195 | H18 | PZ  | -0.00657 | -0.00174 | 0.00831  | -0.00738 | 0.00055  |
| 196 | C9  | S   | 0.00000  | 0.00000  | 0.00000  | 0.00000  | 0.00000  |
| 197 | C9  | S   | 0.00000  | 0.00000  | 0.00000  | 0.00000  | 0.00000  |
| 198 | C9  | PX  | 0.00000  | 0.00000  | 0.00000  | 0.00000  | 0.00000  |
| 199 | C9  | PY  | 0.00000  | 0.00000  | 0.00000  | 0.00000  | 0.00000  |
| 200 | C9  | PZ  | -0.01648 | 0.00190  | -0.00200 | -0.02571 | -0.04464 |
| 201 | C9  | S   | 0.00000  | 0.00000  | 0.00000  | 0.00000  | 0.00000  |
| 202 | C9  | PX  | 0.00000  | 0.00000  | 0.00000  | 0.00000  | 0.00000  |
| 203 | C9  | PY  | 0.00000  | 0.00000  | 0.00000  | 0.00000  | 0.00000  |
| 204 | C9  | PZ  | -0.00055 | 0.03193  | 0.02738  | -0.04912 | -0.17572 |
| 205 | C9  | DXX | 0.00000  | 0.00000  | 0.00000  | 0.00000  | 0.00000  |
| 206 | C9  | DYY | 0.00000  | 0.00000  | 0.00000  | 0.00000  | 0.00000  |
| 207 | C9  | DZZ | 0.00000  | 0.00000  | 0.00000  | 0.00000  | 0.00000  |
| 208 | C9  | DXY | 0.00000  | 0.00000  | 0.00000  | 0.00000  | 0.00000  |
| 209 | C9  | DXZ | -0.00576 | -0.00774 | -0.00645 | -0.00633 | 0.00945  |
| 210 | C9  | DYZ | -0.00071 | -0.00067 | -0.00116 | -0.00186 | -0.00122 |
| 211 | H3  | S   | 0.00000  | 0.00000  | 0.00000  | 0.00000  | 0.00000  |
| 212 | H3  | S   | 0.00000  | 0.00000  | 0.00000  | 0.00000  | 0.00000  |
| 213 | H3  | PX  | 0.00000  | 0.00000  | 0.00000  | 0.00000  | 0.00000  |
| 214 | H3  | PY  | 0.00000  | 0.00000  | 0.00000  | 0.00000  | 0.00000  |
| 215 | H3  | PZ  | -0.00042 | -0.00017 | -0.00028 | -0.00055 | -0.00123 |
| 216 | H5  | S   | 0.01770  | 0.01653  | 0.01498  | 0.01802  | -0.02033 |
| 217 | H5  | S   | 0.02831  | 0.06204  | 0.04534  | -0.04716 | -0.21259 |
| 218 | H5  | PX  | -0.00021 | -0.00045 | 0.00015  | 0.00114  | -0.00006 |
| 219 | H5  | PY  | 0.00030  | -0.00061 | 0.00063  | 0.00191  | 0.00027  |
| 220 | H5  | PZ  | 0.00037  | 0.00051  | 0.00015  | -0.00062 | -0.00042 |
| 221 | H7  | S   | -0.01770 | -0.01653 | -0.01498 | -0.01802 | 0.02033  |
| 222 | H7  | S   | -0.02831 | -0.06204 | -0.04534 | 0.04716  | 0.21259  |
| 223 | H7  | PX  | 0.00021  | 0.00045  | -0.00015 | -0.00114 | 0.00006  |
| 224 | H7  | PY  | -0.00030 | 0.00061  | -0.00063 | -0.00191 | -0.00027 |
| 225 | H7  | PZ  | 0.00037  | 0.00051  | 0.00015  | -0.00062 | -0.00042 |

|              |         |         |         |         |         |
|--------------|---------|---------|---------|---------|---------|
| MO:          | 46      | 47      | 48      | 49      | 50      |
| Eigenvalues: | 0.24034 | 0.26187 | 0.27027 | 0.28712 | 0.28819 |
| (ev):        | 6.53990 | 7.12597 | 7.35443 | 7.81290 | 7.84201 |

|   |    | A  | A        | A        | A        | A       |          |
|---|----|----|----------|----------|----------|---------|----------|
| 1 | H1 | S  | -0.00619 | 0.03893  | 0.02832  | 0.00000 | -0.03004 |
| 2 | H1 | S  | 1.08684  | 0.20809  | 0.66057  | 0.00000 | -0.85845 |
| 3 | H1 | PX | -0.00260 | 0.00192  | -0.00132 | 0.00000 | 0.00245  |
| 4 | H1 | PY | 0.00254  | -0.00148 | -0.00673 | 0.00000 | 0.00480  |
| 5 | H1 | PZ | 0.00000  | 0.00000  | 0.00000  | 0.00401 | 0.00000  |

|    |    |     |          |          |          |          |          |
|----|----|-----|----------|----------|----------|----------|----------|
| 6  | C1 | S   | 0.05094  | 0.01548  | 0.01412  | 0.00000  | -0.01494 |
| 7  | C1 | S   | -0.09647 | -0.02132 | 0.01187  | 0.00000  | -0.01147 |
| 8  | C1 | PX  | -0.11575 | -0.00380 | -0.06031 | 0.00000  | 0.09776  |
| 9  | C1 | PY  | -0.05439 | 0.00687  | -0.03961 | 0.00000  | 0.03417  |
| 10 | C1 | PZ  | 0.00000  | 0.00000  | 0.00000  | 0.03752  | 0.00000  |
| 11 | C1 | S   | -0.57641 | -0.10038 | -0.51255 | 0.00000  | 0.59910  |
| 12 | C1 | PX  | -0.68766 | 0.03191  | -0.27120 | 0.00000  | 0.29158  |
| 13 | C1 | PY  | -0.20704 | -0.17457 | -0.28345 | 0.00000  | 0.50676  |
| 14 | C1 | PZ  | 0.00000  | 0.00000  | 0.00000  | 0.20662  | 0.00000  |
| 15 | C1 | DXX | -0.00170 | 0.01614  | 0.01332  | 0.00000  | -0.01069 |
| 16 | C1 | DYY | -0.00101 | -0.00600 | -0.01096 | 0.00000  | 0.00874  |
| 17 | C1 | DZZ | 0.00082  | -0.00324 | 0.00234  | 0.00000  | -0.00267 |
| 18 | C1 | DXY | 0.00190  | 0.00092  | -0.00032 | 0.00000  | -0.00140 |
| 19 | C1 | DXZ | 0.00000  | 0.00000  | 0.00000  | 0.00830  | 0.00000  |
| 20 | C1 | DYZ | 0.00000  | 0.00000  | 0.00000  | 0.00573  | 0.00000  |
| 21 | C2 | S   | 0.01054  | 0.04900  | 0.01417  | 0.00000  | 0.01593  |
| 22 | C2 | S   | -0.02742 | -0.06174 | -0.01166 | 0.00000  | -0.01555 |
| 23 | C2 | PX  | 0.01756  | 0.13624  | 0.04484  | 0.00000  | 0.09234  |
| 24 | C2 | PY  | -0.00273 | 0.03270  | -0.00946 | 0.00000  | 0.03848  |
| 25 | C2 | PZ  | 0.00000  | 0.00000  | 0.00000  | 0.04340  | 0.00000  |
| 26 | C2 | S   | -0.19832 | -0.90900 | -0.36237 | 0.00000  | -0.32974 |
| 27 | C2 | PX  | 0.12896  | 0.53309  | 0.05994  | 0.00000  | 0.40415  |
| 28 | C2 | PY  | -0.01499 | 0.41024  | -0.06562 | 0.00000  | 0.29295  |
| 29 | C2 | PZ  | 0.00000  | 0.00000  | 0.00000  | 0.14642  | 0.00000  |
| 30 | C2 | DXX | 0.00150  | 0.01467  | -0.00216 | 0.00000  | 0.00623  |
| 31 | C2 | DYY | -0.00118 | -0.01093 | 0.00084  | 0.00000  | -0.00457 |
| 32 | C2 | DZZ | -0.00258 | -0.00003 | 0.00021  | 0.00000  | 0.00090  |
| 33 | C2 | DXY | 0.00127  | 0.01071  | 0.00380  | 0.00000  | 0.00547  |
| 34 | C2 | DXZ | 0.00000  | 0.00000  | 0.00000  | -0.00932 | 0.00000  |
| 35 | C2 | DYZ | 0.00000  | 0.00000  | 0.00000  | 0.00260  | 0.00000  |
| 36 | C3 | S   | -0.00308 | 0.02750  | 0.00517  | 0.00000  | -0.01280 |
| 37 | C3 | S   | 0.01417  | -0.06468 | 0.00531  | 0.00000  | -0.00644 |
| 38 | C3 | PX  | -0.00424 | 0.02618  | -0.01320 | 0.00000  | 0.09111  |
| 39 | C3 | PY  | 0.03231  | 0.00581  | -0.07439 | 0.00000  | 0.02315  |
| 40 | C3 | PZ  | 0.00000  | 0.00000  | 0.00000  | -0.08611 | 0.00000  |
| 41 | C3 | S   | -0.28257 | -0.11029 | -0.55799 | 0.00000  | 0.79586  |
| 42 | C3 | PX  | 0.05252  | -0.28012 | 0.17599  | 0.00000  | 0.21015  |
| 43 | C3 | PY  | 0.10233  | -0.10052 | 0.14321  | 0.00000  | -0.02272 |
| 44 | C3 | PZ  | 0.00000  | 0.00000  | 0.00000  | -0.30890 | 0.00000  |
| 45 | C3 | DXX | -0.00139 | 0.01128  | -0.01130 | 0.00000  | 0.00919  |
| 46 | C3 | DYY | -0.00402 | -0.00749 | 0.00683  | 0.00000  | -0.00404 |
| 47 | C3 | DZZ | 0.00119  | -0.00352 | -0.00166 | 0.00000  | -0.00170 |
| 48 | C3 | DXY | -0.00875 | -0.00978 | -0.00137 | 0.00000  | -0.00064 |
| 49 | C3 | DXZ | 0.00000  | 0.00000  | 0.00000  | 0.02664  | 0.00000  |
| 50 | C3 | DYZ | 0.00000  | 0.00000  | 0.00000  | -0.00417 | 0.00000  |
| 51 | C4 | S   | -0.00321 | 0.01247  | 0.00197  | 0.00000  | 0.00625  |
| 52 | C4 | S   | -0.02486 | -0.01750 | 0.00909  | 0.00000  | -0.03073 |
| 53 | C4 | PX  | -0.00618 | 0.01113  | -0.00306 | 0.00000  | 0.02019  |
| 54 | C4 | PY  | -0.03216 | -0.08070 | -0.09100 | 0.00000  | 0.06727  |
| 55 | C4 | PZ  | 0.00000  | 0.00000  | 0.00000  | -0.01878 | 0.00000  |
| 56 | C4 | S   | 0.01515  | 0.06311  | 0.04453  | 0.00000  | -0.11309 |
| 57 | C4 | PX  | -0.02026 | -0.04517 | 0.07317  | 0.00000  | -0.28361 |
| 58 | C4 | PY  | 0.30425  | -0.08013 | -0.10468 | 0.00000  | 0.19724  |
| 59 | C4 | PZ  | 0.00000  | 0.00000  | 0.00000  | -0.11812 | 0.00000  |

|     |    |     |          |          |          |          |          |
|-----|----|-----|----------|----------|----------|----------|----------|
| 60  | C4 | DXX | -0.01474 | -0.00938 | -0.01108 | 0.00000  | 0.00934  |
| 61  | C4 | DYY | 0.01511  | 0.02505  | 0.02022  | 0.00000  | -0.00988 |
| 62  | C4 | DZZ | -0.00253 | -0.00586 | -0.00427 | 0.00000  | 0.00139  |
| 63  | C4 | DXY | 0.00924  | 0.01180  | 0.00252  | 0.00000  | 0.00850  |
| 64  | C4 | DXZ | 0.00000  | 0.00000  | 0.00000  | 0.00409  | 0.00000  |
| 65  | C4 | DYZ | 0.00000  | 0.00000  | 0.00000  | 0.00287  | 0.00000  |
| 66  | C5 | S   | 0.01515  | 0.04388  | 0.01875  | 0.00000  | 0.01638  |
| 67  | C5 | S   | -0.02142 | -0.04567 | -0.02363 | 0.00000  | 0.00073  |
| 68  | C5 | PX  | 0.00917  | 0.11400  | 0.02734  | 0.00000  | 0.09577  |
| 69  | C5 | PY  | -0.02867 | -0.09987 | -0.06392 | 0.00000  | -0.04198 |
| 70  | C5 | PZ  | 0.00000  | 0.00000  | 0.00000  | 0.01654  | 0.00000  |
| 71  | C5 | S   | -0.17293 | -1.00320 | -0.20067 | 0.00000  | -0.69296 |
| 72  | C5 | PX  | 0.04067  | 0.30822  | 0.09382  | 0.00000  | 0.20899  |
| 73  | C5 | PY  | -0.24188 | -0.44948 | -0.29734 | 0.00000  | -0.20524 |
| 74  | C5 | PZ  | 0.00000  | 0.00000  | 0.00000  | -0.02684 | 0.00000  |
| 75  | C5 | DXX | 0.00621  | 0.00432  | 0.00769  | 0.00000  | -0.01111 |
| 76  | C5 | DYY | -0.00471 | -0.00177 | -0.00140 | 0.00000  | 0.00290  |
| 77  | C5 | DZZ | 0.00111  | 0.00031  | -0.00084 | 0.00000  | 0.00392  |
| 78  | C5 | DXY | -0.00911 | -0.01916 | -0.00988 | 0.00000  | -0.00115 |
| 79  | C5 | DXZ | 0.00000  | 0.00000  | 0.00000  | -0.00585 | 0.00000  |
| 80  | C5 | DYZ | 0.00000  | 0.00000  | 0.00000  | -0.00170 | 0.00000  |
| 81  | C6 | S   | 0.00971  | 0.00361  | 0.00870  | 0.00000  | -0.00991 |
| 82  | C6 | S   | -0.02500 | -0.00510 | -0.03215 | 0.00000  | 0.03227  |
| 83  | C6 | PX  | -0.03025 | 0.03576  | -0.03611 | 0.00000  | 0.03921  |
| 84  | C6 | PY  | -0.00328 | 0.03687  | -0.03602 | 0.00000  | -0.00720 |
| 85  | C6 | PZ  | 0.00000  | 0.00000  | 0.00000  | -0.09263 | 0.00000  |
| 86  | C6 | S   | 0.02000  | -0.03886 | 0.15318  | 0.00000  | 0.10525  |
| 87  | C6 | PX  | 0.04187  | -0.25476 | 0.03621  | 0.00000  | -0.03187 |
| 88  | C6 | PY  | -0.09139 | -0.11285 | -0.00845 | 0.00000  | -0.14376 |
| 89  | C6 | PZ  | 0.00000  | 0.00000  | 0.00000  | -0.26219 | 0.00000  |
| 90  | C6 | DXX | -0.00279 | -0.01897 | 0.00864  | 0.00000  | -0.01259 |
| 91  | C6 | DYY | 0.00744  | 0.02347  | -0.00077 | 0.00000  | 0.01290  |
| 92  | C6 | DZZ | -0.00213 | -0.00172 | -0.00414 | 0.00000  | 0.00200  |
| 93  | C6 | DXY | 0.00555  | -0.00015 | -0.00057 | 0.00000  | -0.00521 |
| 94  | C6 | DXZ | 0.00000  | 0.00000  | 0.00000  | -0.01943 | 0.00000  |
| 95  | C6 | DYZ | 0.00000  | 0.00000  | 0.00000  | -0.02113 | 0.00000  |
| 96  | C7 | S   | -0.00025 | -0.02390 | 0.04688  | 0.00000  | -0.00671 |
| 97  | C7 | S   | -0.00581 | 0.04419  | -0.06732 | 0.00000  | 0.00865  |
| 98  | C7 | PX  | -0.01761 | 0.05800  | -0.18041 | 0.00000  | 0.07349  |
| 99  | C7 | PY  | 0.01734  | 0.02943  | 0.02840  | 0.00000  | 0.01052  |
| 100 | C7 | PZ  | 0.00000  | 0.00000  | 0.00000  | 0.21306  | 0.00000  |
| 101 | C7 | S   | 0.05476  | 0.26039  | -0.70134 | 0.00000  | 0.07176  |
| 102 | C7 | PX  | -0.15135 | 0.49960  | -1.07502 | 0.00000  | 0.42282  |
| 103 | C7 | PY  | 0.15457  | 0.31217  | 0.12646  | 0.00000  | -0.43524 |
| 104 | C7 | PZ  | 0.00000  | 0.00000  | 0.00000  | 0.62851  | 0.00000  |
| 105 | C7 | DXX | -0.00207 | -0.00375 | 0.00321  | 0.00000  | -0.01455 |
| 106 | C7 | DYY | 0.00087  | 0.00053  | -0.00004 | 0.00000  | 0.00978  |
| 107 | C7 | DZZ | -0.00044 | 0.00051  | -0.00032 | 0.00000  | 0.00062  |
| 108 | C7 | DXY | 0.00186  | 0.00469  | -0.00258 | 0.00000  | -0.00187 |
| 109 | C7 | DXZ | 0.00000  | 0.00000  | 0.00000  | 0.02366  | 0.00000  |
| 110 | C7 | DYZ | 0.00000  | 0.00000  | 0.00000  | 0.01682  | 0.00000  |
| 111 | O1 | S   | -0.00429 | -0.02637 | -0.03259 | 0.00000  | 0.03394  |
| 112 | O1 | S   | 0.00399  | 0.04905  | 0.05186  | 0.00000  | -0.04810 |
| 113 | O1 | PX  | 0.04676  | 0.03350  | 0.05065  | 0.00000  | -0.06171 |

|     |    |     |          |          |          |          |          |
|-----|----|-----|----------|----------|----------|----------|----------|
| 114 | O1 | PY  | -0.02972 | -0.06217 | -0.04713 | 0.00000  | 0.01427  |
| 115 | O1 | PZ  | 0.00000  | 0.00000  | 0.00000  | 0.01926  | 0.00000  |
| 116 | O1 | S   | -0.00273 | 0.27781  | 0.39420  | 0.00000  | -0.47112 |
| 117 | O1 | PX  | 0.15852  | 0.07491  | 0.12333  | 0.00000  | -0.15826 |
| 118 | O1 | PY  | 0.09908  | -0.03163 | -0.03626 | 0.00000  | 0.04233  |
| 119 | O1 | PZ  | 0.00000  | 0.00000  | 0.00000  | 0.06273  | 0.00000  |
| 120 | O1 | DXX | -0.00217 | 0.00333  | -0.00079 | 0.00000  | 0.00550  |
| 121 | O1 | DYY | -0.01146 | -0.01183 | -0.01108 | 0.00000  | 0.00523  |
| 122 | O1 | DZZ | 0.00134  | -0.00646 | -0.00975 | 0.00000  | 0.01049  |
| 123 | O1 | DXY | -0.00596 | -0.00477 | 0.00132  | 0.00000  | -0.01016 |
| 124 | O1 | DXZ | 0.00000  | 0.00000  | 0.00000  | 0.00178  | 0.00000  |
| 125 | O1 | DYZ | 0.00000  | 0.00000  | 0.00000  | -0.00172 | 0.00000  |
| 126 | H4 | S   | 0.02096  | 0.04489  | 0.02851  | 0.00000  | -0.00783 |
| 127 | H4 | S   | 0.33185  | 1.18998  | 0.52532  | 0.00000  | 0.60583  |
| 128 | H4 | PX  | -0.00087 | 0.00049  | -0.00219 | 0.00000  | 0.00585  |
| 129 | H4 | PY  | -0.00111 | -0.00283 | -0.00144 | 0.00000  | 0.00047  |
| 130 | H4 | PZ  | 0.00000  | 0.00000  | 0.00000  | 0.00116  | 0.00000  |
| 131 | N1 | S   | -0.00046 | -0.01114 | 0.01356  | 0.00000  | -0.00210 |
| 132 | N1 | S   | 0.01018  | 0.04777  | -0.05357 | 0.00000  | 0.02579  |
| 133 | N1 | PX  | -0.00043 | 0.01307  | -0.03989 | 0.00000  | 0.07087  |
| 134 | N1 | PY  | 0.02334  | 0.02993  | 0.03395  | 0.00000  | 0.02181  |
| 135 | N1 | PZ  | 0.00000  | 0.00000  | 0.00000  | 0.24798  | 0.00000  |
| 136 | N1 | S   | -0.04520 | -0.10487 | 0.08509  | 0.00000  | -0.17155 |
| 137 | N1 | PX  | -0.00809 | 0.00664  | 0.01086  | 0.00000  | 0.04287  |
| 138 | N1 | PY  | 0.00191  | -0.04749 | -0.01644 | 0.00000  | -0.05721 |
| 139 | N1 | PZ  | 0.00000  | 0.00000  | 0.00000  | 0.50593  | 0.00000  |
| 140 | N1 | DXX | 0.00441  | 0.00517  | 0.00071  | 0.00000  | -0.00356 |
| 141 | N1 | DYY | -0.00218 | -0.00750 | -0.00241 | 0.00000  | 0.00386  |
| 142 | N1 | DZZ | 0.00215  | 0.00661  | -0.00728 | 0.00000  | 0.00439  |
| 143 | N1 | DXY | -0.00225 | 0.00508  | -0.00421 | 0.00000  | 0.00798  |
| 144 | N1 | DXZ | 0.00000  | 0.00000  | 0.00000  | -0.01260 | 0.00000  |
| 145 | N1 | DYZ | 0.00000  | 0.00000  | 0.00000  | 0.01121  | 0.00000  |
| 146 | H6 | S   | 0.00610  | 0.04324  | -0.00559 | 0.00000  | 0.02550  |
| 147 | H6 | S   | 0.22392  | 1.22351  | 0.24505  | 0.00000  | 0.74365  |
| 148 | H6 | PX  | 0.00081  | 0.00260  | 0.00089  | 0.00000  | 0.00162  |
| 149 | H6 | PY  | 0.00096  | 0.00003  | -0.00013 | 0.00000  | 0.00066  |
| 150 | H6 | PZ  | 0.00000  | 0.00000  | 0.00000  | 0.00306  | 0.00000  |
| 151 | C8 | S   | -0.00745 | -0.00367 | -0.01191 | 0.00000  | 0.01143  |
| 152 | C8 | S   | 0.01386  | -0.01272 | 0.03365  | 0.00000  | -0.01122 |
| 153 | C8 | PX  | -0.00159 | 0.02899  | -0.02810 | 0.00000  | 0.03565  |
| 154 | C8 | PY  | 0.01770  | 0.01968  | 0.00538  | 0.00000  | -0.05602 |
| 155 | C8 | PZ  | 0.00000  | 0.00000  | 0.00000  | -0.39579 | 0.00000  |
| 156 | C8 | S   | 0.13811  | 0.39890  | -0.28415 | 0.00000  | -0.34031 |
| 157 | C8 | PX  | 0.06333  | 0.08820  | 0.21986  | 0.00000  | -0.17930 |
| 158 | C8 | PY  | -0.08972 | 0.24413  | -0.21555 | 0.00000  | 0.07315  |
| 159 | C8 | PZ  | 0.00000  | 0.00000  | 0.00000  | -0.87698 | 0.00000  |
| 160 | C8 | DXX | -0.00168 | 0.00249  | -0.01443 | 0.00000  | 0.01473  |
| 161 | C8 | DYY | 0.00157  | 0.00330  | 0.00655  | 0.00000  | -0.01119 |
| 162 | C8 | DZZ | 0.00061  | -0.00142 | 0.00087  | 0.00000  | -0.00134 |
| 163 | C8 | DXY | -0.00082 | -0.00445 | 0.00515  | 0.00000  | -0.00779 |
| 164 | C8 | DXZ | 0.00000  | 0.00000  | 0.00000  | -0.00292 | 0.00000  |
| 165 | C8 | DYZ | 0.00000  | 0.00000  | 0.00000  | -0.00217 | 0.00000  |
| 166 | H8 | S   | -0.00913 | -0.00938 | -0.00870 | 0.00000  | -0.03141 |
| 167 | H8 | S   | 0.13767  | -0.63734 | 1.55074  | 0.00000  | -0.59359 |

|     |     |     |          |          |          |          |          |
|-----|-----|-----|----------|----------|----------|----------|----------|
| 168 | H8  | PX  | -0.00115 | 0.00224  | -0.00654 | 0.00000  | -0.00023 |
| 169 | H8  | PY  | 0.00156  | 0.00261  | -0.00141 | 0.00000  | -0.00311 |
| 170 | H8  | PZ  | 0.00000  | 0.00000  | 0.00000  | 0.01426  | 0.00000  |
| 171 | C10 | S   | -0.00350 | -0.04121 | 0.05811  | 0.00000  | 0.07719  |
| 172 | C10 | S   | 0.00971  | 0.04891  | -0.05729 | 0.00000  | -0.09223 |
| 173 | C10 | PX  | 0.00321  | 0.06129  | -0.10503 | 0.00000  | 0.00463  |
| 174 | C10 | PY  | -0.00804 | -0.05219 | 0.09314  | 0.00000  | 0.12911  |
| 175 | C10 | PZ  | 0.00000  | 0.00000  | 0.00000  | 0.15426  | 0.00000  |
| 176 | C10 | S   | -0.04562 | 0.74536  | -1.14521 | 0.00000  | -1.11468 |
| 177 | C10 | PX  | 0.01985  | 0.20569  | -0.47057 | 0.00000  | 0.14040  |
| 178 | C10 | PY  | -0.09823 | -0.25327 | 0.33936  | 0.00000  | 0.63849  |
| 179 | C10 | PZ  | 0.00000  | 0.00000  | 0.00000  | 0.60369  | 0.00000  |
| 180 | C10 | DXX | -0.00082 | -0.00229 | 0.00197  | 0.00000  | 0.00447  |
| 181 | C10 | DYY | -0.00113 | -0.00063 | -0.00107 | 0.00000  | 0.00536  |
| 182 | C10 | DZZ | 0.00077  | -0.00217 | 0.00519  | 0.00000  | 0.00297  |
| 183 | C10 | DXY | -0.00045 | 0.00030  | -0.00226 | 0.00000  | 0.00714  |
| 184 | C10 | DXZ | 0.00000  | 0.00000  | 0.00000  | 0.00697  | 0.00000  |
| 185 | C10 | DYZ | 0.00000  | 0.00000  | 0.00000  | -0.02995 | 0.00000  |
| 186 | H16 | S   | -0.00050 | -0.00733 | 0.00825  | 0.00000  | 0.00102  |
| 187 | H16 | S   | -0.06089 | -0.71531 | 1.19181  | 0.00000  | 0.69927  |
| 188 | H16 | PX  | -0.00011 | 0.00091  | -0.00209 | 0.00000  | 0.00197  |
| 189 | H16 | PY  | -0.00020 | -0.00296 | 0.00482  | 0.00000  | 0.00340  |
| 190 | H16 | PZ  | 0.00000  | 0.00000  | 0.00000  | 0.01044  | 0.00000  |
| 191 | H18 | S   | -0.00066 | -0.01014 | 0.01453  | 0.00000  | 0.03636  |
| 192 | H18 | S   | -0.05236 | -0.31846 | 0.38882  | 0.00000  | 1.20170  |
| 193 | H18 | PX  | 0.00021  | 0.00054  | -0.00034 | 0.00000  | -0.00039 |
| 194 | H18 | PY  | 0.00017  | -0.00159 | 0.00213  | 0.00000  | 0.00234  |
| 195 | H18 | PZ  | 0.00000  | 0.00000  | 0.00000  | 0.00941  | 0.00000  |
| 196 | C9  | S   | 0.12324  | -0.02388 | -0.01554 | 0.00000  | 0.00859  |
| 197 | C9  | S   | -0.08691 | 0.01342  | 0.01833  | 0.00000  | -0.01893 |
| 198 | C9  | PX  | -0.11757 | 0.08721  | 0.07042  | 0.00000  | -0.03007 |
| 199 | C9  | PY  | -0.03064 | 0.01990  | 0.05310  | 0.00000  | -0.11934 |
| 200 | C9  | PZ  | 0.00000  | 0.00000  | 0.00000  | -0.04506 | 0.00000  |
| 201 | C9  | S   | -2.21528 | 0.50303  | 0.37139  | 0.00000  | -0.25642 |
| 202 | C9  | PX  | -0.36198 | 0.39307  | 0.38058  | 0.00000  | -0.28991 |
| 203 | C9  | PY  | -0.06116 | 0.00045  | 0.22787  | 0.00000  | -0.51874 |
| 204 | C9  | PZ  | 0.00000  | 0.00000  | 0.00000  | -0.18214 | 0.00000  |
| 205 | C9  | DXX | 0.00477  | -0.00394 | -0.00013 | 0.00000  | -0.00374 |
| 206 | C9  | DYY | 0.01537  | 0.00003  | -0.00028 | 0.00000  | 0.00391  |
| 207 | C9  | DZZ | 0.00676  | -0.00654 | -0.00563 | 0.00000  | 0.00495  |
| 208 | C9  | DXY | -0.00217 | 0.00457  | 0.00352  | 0.00000  | -0.00256 |
| 209 | C9  | DXZ | 0.00000  | 0.00000  | 0.00000  | -0.00129 | 0.00000  |
| 210 | C9  | DYZ | 0.00000  | 0.00000  | 0.00000  | -0.00103 | 0.00000  |
| 211 | H3  | S   | 0.01559  | 0.01435  | 0.00409  | 0.00000  | 0.00932  |
| 212 | H3  | S   | 0.89048  | -0.08429 | -0.30514 | 0.00000  | 0.67073  |
| 213 | H3  | PX  | -0.00236 | 0.00264  | 0.00213  | 0.00000  | -0.00169 |
| 214 | H3  | PY  | -0.00060 | -0.00059 | 0.00112  | 0.00000  | -0.00195 |
| 215 | H3  | PZ  | 0.00000  | 0.00000  | 0.00000  | -0.00083 | 0.00000  |
| 216 | H5  | S   | -0.00331 | -0.01623 | -0.01326 | 0.00154  | 0.01194  |
| 217 | H5  | S   | 1.05077  | -0.42321 | -0.29044 | -0.19845 | 0.06697  |
| 218 | H5  | PX  | -0.00182 | 0.00260  | 0.00292  | 0.00081  | -0.00272 |
| 219 | H5  | PY  | -0.00368 | 0.00107  | 0.00039  | 0.00103  | -0.00101 |
| 220 | H5  | PZ  | 0.00269  | -0.00005 | 0.00072  | -0.00102 | -0.00105 |
| 221 | H7  | S   | -0.00331 | -0.01623 | -0.01326 | -0.00154 | 0.01194  |

|     |    |    |          |          |          |          |          |
|-----|----|----|----------|----------|----------|----------|----------|
| 222 | H7 | S  | 1.05077  | -0.42321 | -0.29044 | 0.19845  | 0.06697  |
| 223 | H7 | PX | -0.00182 | 0.00260  | 0.00292  | -0.00081 | -0.00272 |
| 224 | H7 | PY | -0.00368 | 0.00107  | 0.00039  | -0.00103 | -0.00101 |
| 225 | H7 | PZ | -0.00269 | 0.00005  | -0.00072 | -0.00102 | 0.00105  |

|              |  |         |         |         |         |         |
|--------------|--|---------|---------|---------|---------|---------|
| MO:          |  | 51      | 52      | 53      | 54      | 55      |
| Eigenvalues: |  | 0.30343 | 0.31075 | 0.31495 | 0.32001 | 0.32750 |
| (ev):        |  | 8.25679 | 8.45594 | 8.57019 | 8.70780 | 8.91174 |

|    |    |     |          |          |          |          |          |
|----|----|-----|----------|----------|----------|----------|----------|
|    |    | A   | A        | A        | A        | A        |          |
| 1  | H1 | S   | -0.00467 | -0.02783 | -0.03848 | 0.00000  | -0.04848 |
| 2  | H1 | S   | 0.26537  | -0.75614 | 0.07471  | 0.00000  | -0.88657 |
| 3  | H1 | PX  | -0.00169 | 0.00070  | -0.00318 | 0.00000  | -0.00135 |
| 4  | H1 | PY  | -0.00693 | -0.00008 | 0.00147  | 0.00000  | -0.00127 |
| 5  | H1 | PZ  | 0.00000  | 0.00000  | 0.00000  | -0.00586 | 0.00000  |
| 6  | C1 | S   | 0.00934  | -0.02912 | 0.01226  | 0.00000  | -0.03780 |
| 7  | C1 | S   | -0.02252 | 0.01516  | -0.02113 | 0.00000  | 0.03436  |
| 8  | C1 | PX  | 0.00409  | 0.08723  | -0.00936 | 0.00000  | 0.08843  |
| 9  | C1 | PY  | 0.00966  | -0.01104 | -0.00592 | 0.00000  | 0.04089  |
| 10 | C1 | PZ  | 0.00000  | 0.00000  | 0.00000  | 0.07258  | 0.00000  |
| 11 | C1 | S   | -0.23505 | 0.59110  | -0.22465 | 0.00000  | 0.48640  |
| 12 | C1 | PX  | -0.03381 | 0.40995  | -0.04719 | 0.00000  | 0.45332  |
| 13 | C1 | PY  | -0.32498 | 0.15931  | -0.13183 | 0.00000  | 0.16536  |
| 14 | C1 | PZ  | 0.00000  | 0.00000  | 0.00000  | -0.05990 | 0.00000  |
| 15 | C1 | DXX | 0.00057  | -0.00918 | -0.01193 | 0.00000  | -0.01437 |
| 16 | C1 | DYY | -0.00766 | -0.00295 | 0.00292  | 0.00000  | 0.00662  |
| 17 | C1 | DZZ | 0.00062  | 0.00178  | 0.00326  | 0.00000  | -0.00262 |
| 18 | C1 | DXY | -0.01070 | -0.00156 | -0.00209 | 0.00000  | -0.00717 |
| 19 | C1 | DXZ | 0.00000  | 0.00000  | 0.00000  | -0.01150 | 0.00000  |
| 20 | C1 | DYZ | 0.00000  | 0.00000  | 0.00000  | 0.00257  | 0.00000  |
| 21 | C2 | S   | -0.00026 | 0.02448  | -0.03172 | 0.00000  | 0.04951  |
| 22 | C2 | S   | 0.00736  | -0.02237 | 0.06933  | 0.00000  | -0.06261 |
| 23 | C2 | PX  | -0.00153 | 0.08678  | 0.01159  | 0.00000  | 0.13473  |
| 24 | C2 | PY  | -0.00393 | 0.05952  | 0.01382  | 0.00000  | 0.00780  |
| 25 | C2 | PZ  | 0.00000  | 0.00000  | 0.00000  | 0.01158  | 0.00000  |
| 26 | C2 | S   | -0.05539 | -0.53634 | 0.32967  | 0.00000  | -0.71272 |
| 27 | C2 | PX  | -0.09959 | 0.46174  | -0.36177 | 0.00000  | 0.98315  |
| 28 | C2 | PY  | 0.08800  | 0.24381  | 0.01640  | 0.00000  | -0.05734 |
| 29 | C2 | PZ  | 0.00000  | 0.00000  | 0.00000  | 0.06748  | 0.00000  |
| 30 | C2 | DXX | 0.00340  | -0.00090 | 0.00220  | 0.00000  | -0.00244 |
| 31 | C2 | DYY | -0.00464 | 0.00163  | -0.00515 | 0.00000  | 0.00528  |
| 32 | C2 | DZZ | 0.00116  | 0.00095  | 0.00270  | 0.00000  | 0.00253  |
| 33 | C2 | DXY | -0.00362 | -0.00032 | 0.00236  | 0.00000  | 0.00130  |
| 34 | C2 | DXZ | 0.00000  | 0.00000  | 0.00000  | 0.00015  | 0.00000  |
| 35 | C2 | DYZ | 0.00000  | 0.00000  | 0.00000  | -0.00388 | 0.00000  |
| 36 | C3 | S   | 0.01435  | -0.00064 | -0.00750 | 0.00000  | -0.00037 |
| 37 | C3 | S   | -0.01617 | -0.02716 | 0.05087  | 0.00000  | 0.00202  |
| 38 | C3 | PX  | 0.04178  | -0.00554 | 0.01624  | 0.00000  | 0.04334  |
| 39 | C3 | PY  | -0.01582 | 0.00047  | -0.00541 | 0.00000  | -0.02191 |
| 40 | C3 | PZ  | 0.00000  | 0.00000  | 0.00000  | -0.05935 | 0.00000  |
| 41 | C3 | S   | -0.30941 | 0.34857  | -0.67024 | 0.00000  | -0.02177 |
| 42 | C3 | PX  | 0.18064  | -0.30051 | 0.14735  | 0.00000  | 0.08548  |
| 43 | C3 | PY  | -0.17161 | -0.01655 | 0.38559  | 0.00000  | 0.08671  |
| 44 | C3 | PZ  | 0.00000  | 0.00000  | 0.00000  | -0.06076 | 0.00000  |

|    |    |     |          |          |          |          |          |
|----|----|-----|----------|----------|----------|----------|----------|
| 45 | C3 | DXX | 0.00901  | -0.00131 | -0.00413 | 0.00000  | 0.00297  |
| 46 | C3 | DYY | -0.01219 | 0.00758  | -0.00455 | 0.00000  | -0.00208 |
| 47 | C3 | DZZ | 0.00061  | -0.00256 | 0.00288  | 0.00000  | -0.00122 |
| 48 | C3 | DXY | 0.00112  | 0.00646  | 0.00936  | 0.00000  | 0.00985  |
| 49 | C3 | DXZ | 0.00000  | 0.00000  | 0.00000  | 0.00318  | 0.00000  |
| 50 | C3 | DYZ | 0.00000  | 0.00000  | 0.00000  | 0.00303  | 0.00000  |
| 51 | C4 | S   | -0.03384 | -0.01300 | -0.02054 | 0.00000  | 0.02250  |
| 52 | C4 | S   | 0.03910  | -0.02604 | 0.02652  | 0.00000  | -0.05333 |
| 53 | C4 | PX  | 0.00642  | -0.00674 | -0.00297 | 0.00000  | 0.08417  |
| 54 | C4 | PY  | 0.00218  | 0.09694  | 0.06546  | 0.00000  | 0.02855  |
| 55 | C4 | PZ  | 0.00000  | 0.00000  | 0.00000  | 0.10029  | 0.00000  |
| 56 | C4 | S   | 0.43241  | 0.32887  | 0.12399  | 0.00000  | 0.07629  |
| 57 | C4 | PX  | 0.22837  | -0.13579 | 0.21081  | 0.00000  | 0.04347  |
| 58 | C4 | PY  | 0.01798  | 0.20112  | 0.37996  | 0.00000  | -0.12481 |
| 59 | C4 | PZ  | 0.00000  | 0.00000  | 0.00000  | 0.15399  | 0.00000  |
| 60 | C4 | DXX | -0.00989 | -0.00237 | -0.00138 | 0.00000  | 0.01684  |
| 61 | C4 | DYY | -0.00533 | -0.01013 | -0.00452 | 0.00000  | -0.01172 |
| 62 | C4 | DZZ | 0.00110  | 0.00153  | 0.00513  | 0.00000  | -0.00217 |
| 63 | C4 | DXY | -0.00582 | -0.00147 | -0.00844 | 0.00000  | 0.00681  |
| 64 | C4 | DXZ | 0.00000  | 0.00000  | 0.00000  | 0.00505  | 0.00000  |
| 65 | C4 | DYZ | 0.00000  | 0.00000  | 0.00000  | -0.01407 | 0.00000  |
| 66 | C5 | S   | 0.01232  | 0.01145  | 0.04184  | 0.00000  | -0.06736 |
| 67 | C5 | S   | -0.03371 | -0.00149 | -0.06707 | 0.00000  | 0.09619  |
| 68 | C5 | PX  | -0.03056 | 0.02801  | 0.03270  | 0.00000  | -0.00781 |
| 69 | C5 | PY  | 0.01192  | -0.05532 | -0.06175 | 0.00000  | 0.07594  |
| 70 | C5 | PZ  | 0.00000  | 0.00000  | 0.00000  | -0.03169 | 0.00000  |
| 71 | C5 | S   | -0.03587 | -0.45718 | -0.42662 | 0.00000  | 0.88318  |
| 72 | C5 | PX  | -0.00667 | -0.01465 | 0.52124  | 0.00000  | -0.58837 |
| 73 | C5 | PY  | 0.00485  | -0.19843 | -0.25667 | 0.00000  | 0.41663  |
| 74 | C5 | PZ  | 0.00000  | 0.00000  | 0.00000  | -0.10713 | 0.00000  |
| 75 | C5 | DXX | 0.00533  | -0.00771 | -0.00614 | 0.00000  | -0.00815 |
| 76 | C5 | DYY | -0.00258 | 0.00277  | 0.00767  | 0.00000  | 0.00146  |
| 77 | C5 | DZZ | -0.00193 | 0.00227  | 0.00029  | 0.00000  | 0.00060  |
| 78 | C5 | DXY | 0.00180  | 0.00445  | 0.00963  | 0.00000  | -0.01144 |
| 79 | C5 | DXZ | 0.00000  | 0.00000  | 0.00000  | 0.00580  | 0.00000  |
| 80 | C5 | DYZ | 0.00000  | 0.00000  | 0.00000  | -0.00133 | 0.00000  |
| 81 | C6 | S   | -0.01848 | -0.00044 | 0.01543  | 0.00000  | -0.00319 |
| 82 | C6 | S   | 0.02313  | 0.01973  | -0.04779 | 0.00000  | 0.00813  |
| 83 | C6 | PX  | 0.04501  | -0.01932 | 0.02959  | 0.00000  | 0.02071  |
| 84 | C6 | PY  | 0.03354  | 0.00360  | 0.01761  | 0.00000  | 0.05130  |
| 85 | C6 | PZ  | 0.00000  | 0.00000  | 0.00000  | 0.00305  | 0.00000  |
| 86 | C6 | S   | 0.38781  | -0.19904 | 0.24991  | 0.00000  | -0.23927 |
| 87 | C6 | PX  | 0.12346  | -0.33843 | 0.17007  | 0.00000  | 0.10678  |
| 88 | C6 | PY  | 0.14168  | -0.26389 | 0.08529  | 0.00000  | -0.17563 |
| 89 | C6 | PZ  | 0.00000  | 0.00000  | 0.00000  | -0.01107 | 0.00000  |
| 90 | C6 | DXX | -0.00408 | -0.00355 | 0.00759  | 0.00000  | -0.00101 |
| 91 | C6 | DYY | 0.00699  | 0.00122  | 0.00640  | 0.00000  | -0.00325 |
| 92 | C6 | DZZ | 0.00086  | 0.00197  | -0.00363 | 0.00000  | 0.00083  |
| 93 | C6 | DXY | -0.00596 | 0.00307  | -0.00793 | 0.00000  | -0.00394 |
| 94 | C6 | DXZ | 0.00000  | 0.00000  | 0.00000  | -0.00661 | 0.00000  |
| 95 | C6 | DYZ | 0.00000  | 0.00000  | 0.00000  | -0.00243 | 0.00000  |
| 96 | C7 | S   | 0.00235  | -0.00525 | 0.06047  | 0.00000  | 0.05456  |
| 97 | C7 | S   | -0.02271 | 0.03303  | -0.11854 | 0.00000  | -0.07202 |
| 98 | C7 | PX  | 0.06397  | -0.05109 | -0.10726 | 0.00000  | -0.08038 |

|     |    |     |          |          |          |          |          |
|-----|----|-----|----------|----------|----------|----------|----------|
| 99  | C7 | PY  | 0.02991  | -0.05293 | 0.03927  | 0.00000  | 0.03554  |
| 100 | C7 | PZ  | 0.00000  | 0.00000  | 0.00000  | 0.05195  | 0.00000  |
| 101 | C7 | S   | 0.08644  | -0.18843 | -0.48964 | 0.00000  | -0.75765 |
| 102 | C7 | PX  | 0.30663  | -0.09239 | -0.99134 | 0.00000  | -0.50232 |
| 103 | C7 | PY  | -0.00570 | 0.02841  | 0.30980  | 0.00000  | 0.09398  |
| 104 | C7 | PZ  | 0.00000  | 0.00000  | 0.00000  | 0.10915  | 0.00000  |
| 105 | C7 | DXX | -0.01107 | 0.00750  | 0.00345  | 0.00000  | 0.00290  |
| 106 | C7 | DYY | 0.01232  | -0.01089 | 0.01158  | 0.00000  | 0.00665  |
| 107 | C7 | DZZ | -0.00315 | 0.00386  | -0.00745 | 0.00000  | -0.00216 |
| 108 | C7 | DXY | 0.00211  | -0.00134 | 0.00264  | 0.00000  | 0.00365  |
| 109 | C7 | DXZ | 0.00000  | 0.00000  | 0.00000  | 0.00513  | 0.00000  |
| 110 | C7 | DYZ | 0.00000  | 0.00000  | 0.00000  | -0.00230 | 0.00000  |
| 111 | O1 | S   | -0.00086 | 0.04323  | 0.07180  | 0.00000  | -0.03196 |
| 112 | O1 | S   | 0.00775  | -0.03756 | -0.06026 | 0.00000  | 0.02165  |
| 113 | O1 | PX  | 0.05660  | -0.04120 | -0.11936 | 0.00000  | 0.05243  |
| 114 | O1 | PY  | 0.01156  | -0.00684 | -0.01998 | 0.00000  | 0.06383  |
| 115 | O1 | PZ  | 0.00000  | 0.00000  | 0.00000  | -0.11176 | 0.00000  |
| 116 | O1 | S   | 0.00016  | -0.67365 | -1.13329 | 0.00000  | 0.51144  |
| 117 | O1 | PX  | 0.13016  | -0.14289 | -0.43076 | 0.00000  | 0.21801  |
| 118 | O1 | PY  | -0.03764 | -0.06522 | -0.02882 | 0.00000  | 0.10914  |
| 119 | O1 | PZ  | 0.00000  | 0.00000  | 0.00000  | -0.29008 | 0.00000  |
| 120 | O1 | DXX | -0.00375 | 0.00701  | 0.02176  | 0.00000  | -0.01341 |
| 121 | O1 | DYY | 0.00915  | 0.02135  | 0.02772  | 0.00000  | -0.01441 |
| 122 | O1 | DZZ | 0.00600  | 0.02537  | 0.03568  | 0.00000  | -0.01585 |
| 123 | O1 | DXY | 0.00877  | -0.00069 | -0.00028 | 0.00000  | -0.00535 |
| 124 | O1 | DXZ | 0.00000  | 0.00000  | 0.00000  | 0.00169  | 0.00000  |
| 125 | O1 | DYZ | 0.00000  | 0.00000  | 0.00000  | 0.01031  | 0.00000  |
| 126 | H4 | S   | 0.00808  | -0.01497 | -0.01429 | 0.00000  | 0.00047  |
| 127 | H4 | S   | 0.01583  | 0.33830  | 0.79367  | 0.00000  | -1.12102 |
| 128 | H4 | PX  | -0.00275 | 0.00349  | 0.00436  | 0.00000  | -0.00059 |
| 129 | H4 | PY  | -0.00229 | -0.00017 | 0.00017  | 0.00000  | 0.00449  |
| 130 | H4 | PZ  | 0.00000  | 0.00000  | 0.00000  | -0.00253 | 0.00000  |
| 131 | N1 | S   | -0.00973 | 0.01555  | -0.01570 | 0.00000  | 0.00294  |
| 132 | N1 | S   | 0.03566  | -0.04092 | 0.02702  | 0.00000  | -0.01034 |
| 133 | N1 | PX  | 0.05896  | -0.06785 | -0.01109 | 0.00000  | 0.00871  |
| 134 | N1 | PY  | -0.02658 | 0.03072  | -0.02390 | 0.00000  | -0.02068 |
| 135 | N1 | PZ  | 0.00000  | 0.00000  | 0.00000  | 0.01752  | 0.00000  |
| 136 | N1 | S   | -0.01286 | -0.12631 | 0.19796  | 0.00000  | -0.10162 |
| 137 | N1 | PX  | 0.00915  | 0.01884  | 0.01370  | 0.00000  | -0.09563 |
| 138 | N1 | PY  | -0.05007 | -0.06565 | -0.02393 | 0.00000  | -0.01046 |
| 139 | N1 | PZ  | 0.00000  | 0.00000  | 0.00000  | 0.04109  | 0.00000  |
| 140 | N1 | DXX | -0.00286 | 0.00406  | 0.00561  | 0.00000  | 0.00276  |
| 141 | N1 | DYY | -0.00239 | 0.00007  | -0.01382 | 0.00000  | -0.01037 |
| 142 | N1 | DZZ | 0.00557  | -0.00271 | 0.00028  | 0.00000  | -0.00055 |
| 143 | N1 | DXY | 0.00880  | -0.00788 | 0.00708  | 0.00000  | 0.00425  |
| 144 | N1 | DXZ | 0.00000  | 0.00000  | 0.00000  | -0.00284 | 0.00000  |
| 145 | N1 | DYZ | 0.00000  | 0.00000  | 0.00000  | 0.00254  | 0.00000  |
| 146 | H6 | S   | 0.00340  | -0.00459 | -0.00915 | 0.00000  | 0.01186  |
| 147 | H6 | S   | -0.03265 | 0.79117  | -0.43356 | 0.00000  | 1.36405  |
| 148 | H6 | PX  | -0.00064 | 0.00277  | -0.00202 | 0.00000  | 0.00460  |
| 149 | H6 | PY  | 0.00165  | 0.00091  | -0.00055 | 0.00000  | 0.00001  |
| 150 | H6 | PZ  | 0.00000  | 0.00000  | 0.00000  | 0.00067  | 0.00000  |
| 151 | C8 | S   | 0.00182  | -0.00246 | -0.00834 | 0.00000  | -0.01252 |
| 152 | C8 | S   | -0.01423 | 0.01081  | 0.01809  | 0.00000  | 0.02019  |



|     |     |     |          |          |          |          |          |
|-----|-----|-----|----------|----------|----------|----------|----------|
| 153 | C8  | PX  | 0.08544  | -0.08901 | 0.08547  | 0.00000  | 0.03502  |
| 154 | C8  | PY  | -0.00543 | -0.00168 | 0.07590  | 0.00000  | 0.06448  |
| 155 | C8  | PZ  | 0.00000  | 0.00000  | 0.00000  | -0.04664 | 0.00000  |
| 156 | C8  | S   | 0.07929  | -0.03710 | -0.04664 | 0.00000  | 0.10893  |
| 157 | C8  | PX  | -0.10378 | 0.23776  | 0.09784  | 0.00000  | -0.04646 |
| 158 | C8  | PY  | 0.01019  | 0.12725  | -0.22820 | 0.00000  | 0.02148  |
| 159 | C8  | PZ  | 0.00000  | 0.00000  | 0.00000  | -0.10522 | 0.00000  |
| 160 | C8  | DXX | 0.01542  | -0.01720 | -0.00304 | 0.00000  | -0.00032 |
| 161 | C8  | DYY | -0.01049 | 0.01164  | -0.00110 | 0.00000  | -0.00004 |
| 162 | C8  | DZZ | -0.00277 | 0.00280  | 0.00085  | 0.00000  | 0.00091  |
| 163 | C8  | DXY | -0.01520 | 0.02117  | -0.01865 | 0.00000  | -0.01425 |
| 164 | C8  | DXZ | 0.00000  | 0.00000  | 0.00000  | 0.00245  | 0.00000  |
| 165 | C8  | DYZ | 0.00000  | 0.00000  | 0.00000  | 0.00115  | 0.00000  |
| 166 | H8  | S   | -0.03123 | 0.02199  | 0.01337  | 0.00000  | 0.02118  |
| 167 | H8  | S   | -0.41093 | 0.22138  | 1.41897  | 0.00000  | 1.01991  |
| 168 | H8  | PX  | 0.00016  | -0.00039 | -0.00199 | 0.00000  | -0.00045 |
| 169 | H8  | PY  | 0.00249  | -0.00429 | 0.00359  | 0.00000  | 0.00224  |
| 170 | H8  | PZ  | 0.00000  | 0.00000  | 0.00000  | 0.00371  | 0.00000  |
| 171 | C10 | S   | 0.03012  | -0.02285 | -0.03237 | 0.00000  | -0.02018 |
| 172 | C10 | S   | -0.03611 | 0.02612  | 0.03770  | 0.00000  | 0.01914  |
| 173 | C10 | PX  | 0.13513  | -0.18803 | 0.13826  | 0.00000  | 0.09905  |
| 174 | C10 | PY  | 0.07012  | -0.07205 | -0.02233 | 0.00000  | -0.01424 |
| 175 | C10 | PZ  | 0.00000  | 0.00000  | 0.00000  | 0.01260  | 0.00000  |
| 176 | C10 | S   | -0.47744 | 0.43288  | 0.34659  | 0.00000  | 0.31635  |
| 177 | C10 | PX  | 0.69617  | -1.00561 | 0.69341  | 0.00000  | 0.50356  |
| 178 | C10 | PY  | 0.31519  | -0.30749 | -0.08371 | 0.00000  | 0.01305  |
| 179 | C10 | PZ  | 0.00000  | 0.00000  | 0.00000  | 0.06870  | 0.00000  |
| 180 | C10 | DXX | -0.00074 | 0.00219  | -0.00757 | 0.00000  | -0.00538 |
| 181 | C10 | DYY | 0.00344  | -0.00337 | 0.00022  | 0.00000  | -0.00017 |
| 182 | C10 | DZZ | 0.00084  | -0.00066 | -0.00067 | 0.00000  | -0.00011 |
| 183 | C10 | DXY | 0.00920  | -0.01107 | 0.00919  | 0.00000  | 0.00604  |
| 184 | C10 | DXZ | 0.00000  | 0.00000  | 0.00000  | 0.00146  | 0.00000  |
| 185 | C10 | DYZ | 0.00000  | 0.00000  | 0.00000  | -0.00368 | 0.00000  |
| 186 | H16 | S   | -0.01216 | 0.01750  | -0.03625 | 0.00000  | -0.02501 |
| 187 | H16 | S   | -0.44276 | 0.81765  | -1.08089 | 0.00000  | -0.74860 |
| 188 | H16 | PX  | 0.00277  | -0.00346 | 0.00088  | 0.00000  | 0.00063  |
| 189 | H16 | PY  | 0.00122  | -0.00128 | 0.00142  | 0.00000  | 0.00125  |
| 190 | H16 | PZ  | 0.00000  | 0.00000  | 0.00000  | 0.00119  | 0.00000  |
| 191 | H18 | S   | 0.02726  | -0.02938 | 0.01932  | 0.00000  | 0.01237  |
| 192 | H18 | S   | 1.14026  | -1.35200 | 0.36500  | 0.00000  | 0.30606  |
| 193 | H18 | PX  | 0.00183  | -0.00289 | 0.00387  | 0.00000  | 0.00293  |
| 194 | H18 | PY  | 0.00172  | -0.00196 | 0.00012  | 0.00000  | -0.00029 |
| 195 | H18 | PZ  | 0.00000  | 0.00000  | 0.00000  | 0.00088  | 0.00000  |
| 196 | C9  | S   | -0.00252 | -0.01053 | -0.04933 | 0.00000  | 0.05010  |
| 197 | C9  | S   | 0.01139  | 0.00573  | 0.04870  | 0.00000  | -0.05856 |
| 198 | C9  | PX  | -0.09592 | -0.13991 | -0.10398 | 0.00000  | 0.07226  |
| 199 | C9  | PY  | 0.25929  | 0.10619  | -0.08105 | 0.00000  | 0.00093  |
| 200 | C9  | PZ  | 0.00000  | 0.00000  | 0.00000  | 0.35397  | 0.00000  |
| 201 | C9  | S   | 0.10505  | 0.11501  | 0.78685  | 0.00000  | -0.85523 |
| 202 | C9  | PX  | -0.37029 | -0.81416 | -0.69389 | 0.00000  | 0.30449  |
| 203 | C9  | PY  | 1.17120  | 0.49082  | -0.34613 | 0.00000  | 0.11343  |
| 204 | C9  | PZ  | 0.00000  | 0.00000  | 0.00000  | 1.49800  | 0.00000  |
| 205 | C9  | DXX | 0.00455  | -0.00129 | -0.00372 | 0.00000  | 0.00368  |
| 206 | C9  | DYY | -0.00809 | -0.00284 | 0.00802  | 0.00000  | -0.00863 |

|     |    |     |          |          |          |          |          |
|-----|----|-----|----------|----------|----------|----------|----------|
| 207 | C9 | DZZ | 0.00441  | 0.01198  | 0.00994  | 0.00000  | -0.00130 |
| 208 | C9 | DXY | 0.00431  | 0.00034  | -0.00859 | 0.00000  | 0.00699  |
| 209 | C9 | DXZ | 0.00000  | 0.00000  | 0.00000  | -0.00090 | 0.00000  |
| 210 | C9 | DYZ | 0.00000  | 0.00000  | 0.00000  | 0.00821  | 0.00000  |
| 211 | H3 | S   | -0.04890 | -0.03196 | 0.02027  | 0.00000  | -0.03633 |
| 212 | H3 | S   | -1.65992 | -0.93690 | -0.09336 | 0.00000  | 0.33069  |
| 213 | H3 | PX  | 0.00073  | -0.00173 | -0.00502 | 0.00000  | 0.00323  |
| 214 | H3 | PY  | 0.00587  | 0.00390  | 0.00150  | 0.00000  | -0.00055 |
| 215 | H3 | PZ  | 0.00000  | 0.00000  | 0.00000  | 0.00886  | 0.00000  |
| 216 | H5 | S   | 0.01780  | 0.03698  | 0.02573  | 0.03442  | 0.00253  |
| 217 | H5 | S   | 0.64376  | 0.62127  | -0.11680 | 1.65672  | 0.25596  |
| 218 | H5 | PX  | -0.00230 | -0.00594 | -0.00329 | -0.00149 | 0.00025  |
| 219 | H5 | PY  | 0.00471  | 0.00310  | -0.00433 | -0.00294 | 0.00463  |
| 220 | H5 | PZ  | -0.00005 | -0.00189 | -0.00183 | 0.00625  | 0.00028  |
| 221 | H7 | S   | 0.01780  | 0.03698  | 0.02573  | -0.03442 | 0.00253  |
| 222 | H7 | S   | 0.64376  | 0.62127  | -0.11680 | -1.65672 | 0.25596  |
| 223 | H7 | PX  | -0.00230 | -0.00594 | -0.00329 | 0.00149  | 0.00025  |
| 224 | H7 | PY  | 0.00471  | 0.00310  | -0.00433 | 0.00294  | 0.00463  |
| 225 | H7 | PZ  | 0.00005  | 0.00189  | 0.00183  | 0.00625  | -0.00028 |

|              |         |          |          |          |          |
|--------------|---------|----------|----------|----------|----------|
| MO:          | 56      | 57       | 58       | 59       | 60       |
| Eigenvalues: | 0.34257 | 0.38340  | 0.40188  | 0.43117  | 0.43713  |
| (ev):        | 9.32173 | 10.43278 | 10.93575 | 11.73272 | 11.89486 |

|    |    | A   | A        | A        | A        | A        |          |
|----|----|-----|----------|----------|----------|----------|----------|
| 1  | H1 | S   | 0.00671  | 0.00000  | -0.06753 | 0.05645  | 0.05346  |
| 2  | H1 | S   | -1.28388 | 0.00000  | -0.55255 | -0.27599 | -0.72249 |
| 3  | H1 | PX  | 0.00563  | 0.00000  | -0.00152 | 0.00879  | 0.00623  |
| 4  | H1 | PY  | -0.00244 | 0.00000  | -0.00544 | -0.00791 | 0.00193  |
| 5  | H1 | PZ  | 0.00000  | -0.01587 | 0.00000  | 0.00000  | 0.00000  |
| 6  | C1 | S   | -0.04912 | 0.00000  | 0.01491  | -0.02798 | -0.04996 |
| 7  | C1 | S   | 0.07957  | 0.00000  | -0.05400 | 0.06888  | 0.01839  |
| 8  | C1 | PX  | 0.14604  | 0.00000  | 0.08031  | 0.00672  | 0.03089  |
| 9  | C1 | PY  | -0.01368 | 0.00000  | 0.02674  | -0.12945 | -0.03671 |
| 10 | C1 | PZ  | 0.00000  | -0.20358 | 0.00000  | 0.00000  | 0.00000  |
| 11 | C1 | S   | 0.76353  | 0.00000  | -0.23067 | 0.46137  | 1.22731  |
| 12 | C1 | PX  | 0.73712  | 0.00000  | 0.96305  | 0.22601  | 0.39842  |
| 13 | C1 | PY  | 0.29545  | 0.00000  | -1.15381 | 0.14930  | -0.05196 |
| 14 | C1 | PZ  | 0.00000  | -0.66158 | 0.00000  | 0.00000  | 0.00000  |
| 15 | C1 | DXX | 0.01065  | 0.00000  | -0.01233 | 0.02607  | 0.02156  |
| 16 | C1 | DYY | -0.01190 | 0.00000  | 0.00200  | -0.02922 | -0.02132 |
| 17 | C1 | DZZ | 0.00329  | 0.00000  | -0.00113 | 0.00767  | -0.00294 |
| 18 | C1 | DXY | -0.00061 | 0.00000  | -0.02379 | 0.00366  | 0.01742  |
| 19 | C1 | DXZ | 0.00000  | -0.02089 | 0.00000  | 0.00000  | 0.00000  |
| 20 | C1 | DYZ | 0.00000  | -0.00947 | 0.00000  | 0.00000  | 0.00000  |
| 21 | C2 | S   | -0.05195 | 0.00000  | 0.01755  | 0.03906  | 0.03134  |
| 22 | C2 | S   | 0.08340  | 0.00000  | -0.01232 | -0.00821 | -0.04726 |
| 23 | C2 | PX  | -0.06179 | 0.00000  | -0.08988 | -0.00287 | -0.06792 |
| 24 | C2 | PY  | -0.07166 | 0.00000  | 0.05338  | -0.00449 | 0.01292  |
| 25 | C2 | PZ  | 0.00000  | 0.19839  | 0.00000  | 0.00000  | 0.00000  |
| 26 | C2 | S   | 0.62107  | 0.00000  | -0.40399 | -1.28135 | -0.72267 |
| 27 | C2 | PX  | -0.84029 | 0.00000  | -0.68359 | -0.11847 | -0.07342 |
| 28 | C2 | PY  | -0.28830 | 0.00000  | 0.78303  | 0.88753  | -0.77940 |
| 29 | C2 | PZ  | 0.00000  | 0.63790  | 0.00000  | 0.00000  | 0.00000  |

|    |    |     |          |          |          |          |          |
|----|----|-----|----------|----------|----------|----------|----------|
| 30 | C2 | DXX | 0.00294  | 0.00000  | 0.01108  | -0.01007 | -0.01895 |
| 31 | C2 | DYY | -0.00813 | 0.00000  | -0.01263 | 0.00541  | 0.01622  |
| 32 | C2 | DZZ | 0.00207  | 0.00000  | 0.00065  | 0.00197  | -0.00161 |
| 33 | C2 | DXY | 0.01297  | 0.00000  | -0.01994 | -0.02940 | -0.00841 |
| 34 | C2 | DXZ | 0.00000  | -0.02006 | 0.00000  | 0.00000  | 0.00000  |
| 35 | C2 | DYZ | 0.00000  | -0.00041 | 0.00000  | 0.00000  | 0.00000  |
| 36 | C3 | S   | 0.00106  | 0.00000  | 0.05599  | 0.02933  | 0.03172  |
| 37 | C3 | S   | 0.00188  | 0.00000  | -0.07774 | -0.06614 | -0.04750 |
| 38 | C3 | PX  | -0.00519 | 0.00000  | 0.08758  | 0.04579  | -0.18314 |
| 39 | C3 | PY  | -0.09408 | 0.00000  | 0.03897  | -0.13845 | -0.04047 |
| 40 | C3 | PZ  | 0.00000  | 0.30802  | 0.00000  | 0.00000  | 0.00000  |
| 41 | C3 | S   | 0.11315  | 0.00000  | -1.67746 | 0.77700  | -0.95378 |
| 42 | C3 | PX  | -0.01997 | 0.00000  | -0.29406 | 0.39121  | -1.12370 |
| 43 | C3 | PY  | 0.11382  | 0.00000  | -0.25585 | -0.62175 | 0.12388  |
| 44 | C3 | PZ  | 0.00000  | 0.74766  | 0.00000  | 0.00000  | 0.00000  |
| 45 | C3 | DXX | -0.00882 | 0.00000  | 0.02978  | -0.01015 | -0.01460 |
| 46 | C3 | DYY | 0.01422  | 0.00000  | -0.04311 | 0.03257  | 0.00523  |
| 47 | C3 | DZZ | -0.00154 | 0.00000  | -0.00125 | -0.00718 | 0.00127  |
| 48 | C3 | DXY | 0.01567  | 0.00000  | 0.02250  | -0.00607 | -0.00376 |
| 49 | C3 | DXZ | 0.00000  | 0.01119  | 0.00000  | 0.00000  | 0.00000  |
| 50 | C3 | DYZ | 0.00000  | -0.00559 | 0.00000  | 0.00000  | 0.00000  |
| 51 | C4 | S   | 0.00914  | 0.00000  | -0.07733 | -0.04883 | 0.01756  |
| 52 | C4 | S   | -0.01604 | 0.00000  | 0.08618  | 0.05212  | -0.02875 |
| 53 | C4 | PX  | -0.03951 | 0.00000  | -0.02449 | -0.22215 | -0.13135 |
| 54 | C4 | PY  | -0.05360 | 0.00000  | -0.04395 | -0.09802 | -0.06614 |
| 55 | C4 | PZ  | 0.00000  | 0.26738  | 0.00000  | 0.00000  | 0.00000  |
| 56 | C4 | S   | -0.16725 | 0.00000  | 1.99205  | 1.21439  | 0.07907  |
| 57 | C4 | PX  | -0.06087 | 0.00000  | 0.53103  | -1.27733 | -0.62829 |
| 58 | C4 | PY  | -0.02999 | 0.00000  | -0.25431 | -0.91970 | -0.11918 |
| 59 | C4 | PZ  | 0.00000  | 0.59937  | 0.00000  | 0.00000  | 0.00000  |
| 60 | C4 | DXX | -0.00461 | 0.00000  | 0.00746  | -0.01099 | -0.01549 |
| 61 | C4 | DYY | 0.00267  | 0.00000  | -0.00877 | 0.01029  | 0.02216  |
| 62 | C4 | DZZ | -0.00172 | 0.00000  | 0.00727  | 0.00077  | -0.00181 |
| 63 | C4 | DXY | 0.00688  | 0.00000  | -0.00746 | -0.01086 | -0.00262 |
| 64 | C4 | DXZ | 0.00000  | -0.00226 | 0.00000  | 0.00000  | 0.00000  |
| 65 | C4 | DYZ | 0.00000  | 0.00637  | 0.00000  | 0.00000  | 0.00000  |
| 66 | C5 | S   | 0.03401  | 0.00000  | 0.03687  | 0.04961  | -0.00701 |
| 67 | C5 | S   | -0.03326 | 0.00000  | -0.05860 | -0.01115 | 0.00367  |
| 68 | C5 | PX  | 0.14521  | 0.00000  | -0.04954 | -0.14403 | -0.05725 |
| 69 | C5 | PY  | -0.06413 | 0.00000  | 0.03626  | 0.01079  | -0.09407 |
| 70 | C5 | PZ  | 0.00000  | -0.19154 | 0.00000  | 0.00000  | 0.00000  |
| 71 | C5 | S   | -0.57219 | 0.00000  | -0.67258 | -1.64646 | 0.35518  |
| 72 | C5 | PX  | 0.80142  | 0.00000  | -0.07837 | -1.34242 | -0.47419 |
| 73 | C5 | PY  | -0.62623 | 0.00000  | 0.09741  | -0.17276 | -0.93968 |
| 74 | C5 | PZ  | 0.00000  | -0.58587 | 0.00000  | 0.00000  | 0.00000  |
| 75 | C5 | DXX | 0.00190  | 0.00000  | 0.01269  | 0.02130  | 0.01170  |
| 76 | C5 | DYY | 0.00148  | 0.00000  | -0.01571 | -0.02055 | -0.00644 |
| 77 | C5 | DZZ | 0.00295  | 0.00000  | -0.00182 | -0.00112 | -0.00431 |
| 78 | C5 | DXY | 0.00142  | 0.00000  | 0.01732  | 0.01103  | 0.00505  |
| 79 | C5 | DXZ | 0.00000  | 0.01055  | 0.00000  | 0.00000  | 0.00000  |
| 80 | C5 | DYZ | 0.00000  | -0.01070 | 0.00000  | 0.00000  | 0.00000  |
| 81 | C6 | S   | 0.01809  | 0.00000  | -0.08186 | -0.05079 | 0.00542  |
| 82 | C6 | S   | -0.02540 | 0.00000  | 0.10008  | 0.09287  | -0.05341 |
| 83 | C6 | PX  | 0.06516  | 0.00000  | 0.08743  | -0.13896 | -0.10589 |

|     |    |     |          |          |          |          |          |
|-----|----|-----|----------|----------|----------|----------|----------|
| 84  | C6 | PY  | -0.06050 | 0.00000  | 0.15878  | 0.03885  | -0.02965 |
| 85  | C6 | PZ  | 0.00000  | -0.32688 | 0.00000  | 0.00000  | 0.00000  |
| 86  | C6 | S   | -0.04536 | 0.00000  | 1.45262  | 1.08715  | -0.34145 |
| 87  | C6 | PX  | 0.11487  | 0.00000  | -0.28276 | -0.93680 | -0.07443 |
| 88  | C6 | PY  | 0.11467  | 0.00000  | 0.53157  | 0.52225  | -0.60720 |
| 89  | C6 | PZ  | 0.00000  | -0.72723 | 0.00000  | 0.00000  | 0.00000  |
| 90  | C6 | DXX | 0.01329  | 0.00000  | -0.01263 | 0.00711  | 0.01046  |
| 91  | C6 | DYY | -0.00565 | 0.00000  | 0.00477  | -0.00516 | -0.02271 |
| 92  | C6 | DZZ | -0.00104 | 0.00000  | 0.00863  | 0.00780  | -0.00148 |
| 93  | C6 | DXY | -0.01567 | 0.00000  | -0.00110 | -0.01700 | 0.01425  |
| 94  | C6 | DXZ | 0.00000  | 0.00384  | 0.00000  | 0.00000  | 0.00000  |
| 95  | C6 | DYZ | 0.00000  | 0.00379  | 0.00000  | 0.00000  | 0.00000  |
| 96  | C7 | S   | 0.00326  | 0.00000  | 0.02851  | -0.02471 | -0.01947 |
| 97  | C7 | S   | -0.02107 | 0.00000  | -0.06004 | 0.06616  | 0.00674  |
| 98  | C7 | PX  | -0.02851 | 0.00000  | 0.03834  | -0.09123 | 0.02876  |
| 99  | C7 | PY  | -0.02239 | 0.00000  | -0.02232 | -0.00335 | 0.06833  |
| 100 | C7 | PZ  | 0.00000  | -0.05969 | 0.00000  | 0.00000  | 0.00000  |
| 101 | C7 | S   | 0.18263  | 0.00000  | -0.52008 | -0.28196 | 1.10671  |
| 102 | C7 | PX  | -0.31697 | 0.00000  | 0.18825  | 0.02676  | 0.03522  |
| 103 | C7 | PY  | -0.34842 | 0.00000  | 1.32622  | -1.09910 | 0.87839  |
| 104 | C7 | PZ  | 0.00000  | -0.40822 | 0.00000  | 0.00000  | 0.00000  |
| 105 | C7 | DXX | 0.01254  | 0.00000  | -0.01767 | 0.00133  | 0.03343  |
| 106 | C7 | DYY | -0.00138 | 0.00000  | 0.01871  | -0.00615 | -0.02646 |
| 107 | C7 | DZZ | -0.00486 | 0.00000  | -0.00448 | 0.00257  | 0.00123  |
| 108 | C7 | DXY | -0.00920 | 0.00000  | 0.01925  | -0.01009 | 0.00369  |
| 109 | C7 | DXZ | 0.00000  | -0.01291 | 0.00000  | 0.00000  | 0.00000  |
| 110 | C7 | DYZ | 0.00000  | 0.02592  | 0.00000  | 0.00000  | 0.00000  |
| 111 | O1 | S   | -0.04524 | 0.00000  | 0.01174  | -0.00555 | -0.00582 |
| 112 | O1 | S   | 0.01644  | 0.00000  | -0.01792 | 0.00597  | 0.05016  |
| 113 | O1 | PX  | 0.14406  | 0.00000  | 0.02813  | -0.04134 | -0.03071 |
| 114 | O1 | PY  | 0.01949  | 0.00000  | 0.09940  | -0.06224 | -0.10969 |
| 115 | O1 | PZ  | 0.00000  | -0.07103 | 0.00000  | 0.00000  | 0.00000  |
| 116 | O1 | S   | 0.77098  | 0.00000  | -0.16646 | 0.17573  | -0.09420 |
| 117 | O1 | PX  | 0.38082  | 0.00000  | 0.03091  | 0.01353  | -0.07577 |
| 118 | O1 | PY  | 0.10125  | 0.00000  | 0.27858  | -0.24517 | -0.23644 |
| 119 | O1 | PZ  | 0.00000  | -0.15183 | 0.00000  | 0.00000  | 0.00000  |
| 120 | O1 | DXX | -0.01385 | 0.00000  | 0.00102  | -0.00569 | 0.00629  |
| 121 | O1 | DYY | -0.03491 | 0.00000  | -0.00283 | 0.00887  | 0.00612  |
| 122 | O1 | DZZ | -0.02873 | 0.00000  | 0.00621  | 0.00006  | 0.01445  |
| 123 | O1 | DXY | -0.00291 | 0.00000  | 0.00560  | 0.00849  | -0.00068 |
| 124 | O1 | DXZ | 0.00000  | -0.00313 | 0.00000  | 0.00000  | 0.00000  |
| 125 | O1 | DYZ | 0.00000  | -0.01517 | 0.00000  | 0.00000  | 0.00000  |
| 126 | H4 | S   | 0.01979  | 0.00000  | -0.03718 | -0.02317 | -0.00355 |
| 127 | H4 | S   | 1.38695  | 0.00000  | 0.04545  | -0.38728 | 0.23054  |
| 128 | H4 | PX  | 0.00284  | 0.00000  | -0.00564 | -0.00977 | -0.00094 |
| 129 | H4 | PY  | -0.00326 | 0.00000  | -0.01005 | -0.01152 | -0.00251 |
| 130 | H4 | PZ  | 0.00000  | -0.01287 | 0.00000  | 0.00000  | 0.00000  |
| 131 | N1 | S   | -0.01102 | 0.00000  | -0.00166 | 0.00739  | 0.07571  |
| 132 | N1 | S   | 0.01059  | 0.00000  | -0.03733 | -0.00941 | -0.09495 |
| 133 | N1 | PX  | -0.00351 | 0.00000  | -0.09141 | 0.05364  | -0.10242 |
| 134 | N1 | PY  | -0.03362 | 0.00000  | -0.04220 | -0.06118 | 0.03703  |
| 135 | N1 | PZ  | 0.00000  | 0.13848  | 0.00000  | 0.00000  | 0.00000  |
| 136 | N1 | S   | 0.20157  | 0.00000  | 0.40943  | -0.17547 | -1.53284 |
| 137 | N1 | PX  | 0.06822  | 0.00000  | 0.14894  | 0.23102  | -0.67484 |

|     |     |     |          |          |          |          |          |
|-----|-----|-----|----------|----------|----------|----------|----------|
| 138 | N1  | PY  | -0.00410 | 0.00000  | -0.22641 | -0.26196 | 0.17441  |
| 139 | N1  | PZ  | 0.00000  | 0.36123  | 0.00000  | 0.00000  | 0.00000  |
| 140 | N1  | DXX | -0.00223 | 0.00000  | -0.00489 | -0.00549 | 0.00849  |
| 141 | N1  | DYY | 0.00183  | 0.00000  | -0.01437 | 0.00949  | 0.00282  |
| 142 | N1  | DZZ | -0.00404 | 0.00000  | 0.00037  | 0.00068  | 0.01678  |
| 143 | N1  | DXY | 0.00696  | 0.00000  | 0.00240  | -0.00174 | -0.01156 |
| 144 | N1  | DXZ | 0.00000  | 0.00559  | 0.00000  | 0.00000  | 0.00000  |
| 145 | N1  | DYZ | 0.00000  | -0.02108 | 0.00000  | 0.00000  | 0.00000  |
| 146 | H6  | S   | 0.00555  | 0.00000  | -0.00226 | -0.06253 | -0.06302 |
| 147 | H6  | S   | -1.20794 | 0.00000  | -0.30437 | 0.39887  | -0.18278 |
| 148 | H6  | PX  | -0.00395 | 0.00000  | -0.00339 | 0.00267  | 0.00425  |
| 149 | H6  | PY  | -0.00411 | 0.00000  | 0.00925  | 0.01221  | -0.00095 |
| 150 | H6  | PZ  | 0.00000  | 0.01433  | 0.00000  | 0.00000  | 0.00000  |
| 151 | C8  | S   | 0.03307  | 0.00000  | -0.06385 | 0.07109  | -0.08020 |
| 152 | C8  | S   | -0.03017 | 0.00000  | 0.03498  | -0.07064 | 0.05562  |
| 153 | C8  | PX  | 0.00612  | 0.00000  | 0.14223  | -0.07633 | -0.14756 |
| 154 | C8  | PY  | -0.02278 | 0.00000  | 0.04779  | -0.00746 | -0.01862 |
| 155 | C8  | PZ  | 0.00000  | 0.00183  | 0.00000  | 0.00000  | 0.00000  |
| 156 | C8  | S   | -0.84729 | 0.00000  | 1.80359  | -2.42556 | 2.50362  |
| 157 | C8  | PX  | -0.19895 | 0.00000  | 1.24924  | -0.74681 | -0.82917 |
| 158 | C8  | PY  | -0.04479 | 0.00000  | -0.09370 | 0.93923  | -0.56754 |
| 159 | C8  | PZ  | 0.00000  | 0.01225  | 0.00000  | 0.00000  | 0.00000  |
| 160 | C8  | DXX | -0.00121 | 0.00000  | -0.01094 | 0.00486  | -0.01782 |
| 161 | C8  | DYY | -0.00040 | 0.00000  | 0.00450  | -0.01902 | 0.02921  |
| 162 | C8  | DZZ | 0.00022  | 0.00000  | -0.00150 | -0.00109 | 0.00438  |
| 163 | C8  | DXY | -0.00413 | 0.00000  | 0.01397  | 0.00771  | -0.00370 |
| 164 | C8  | DXZ | 0.00000  | -0.02041 | 0.00000  | 0.00000  | 0.00000  |
| 165 | C8  | DYZ | 0.00000  | -0.00471 | 0.00000  | 0.00000  | 0.00000  |
| 166 | H8  | S   | 0.03269  | 0.00000  | -0.05806 | -0.00471 | 0.10550  |
| 167 | H8  | S   | 0.27638  | 0.00000  | 0.05962  | 0.03589  | -0.22852 |
| 168 | H8  | PX  | 0.00256  | 0.00000  | -0.00382 | -0.00022 | 0.00897  |
| 169 | H8  | PY  | -0.00361 | 0.00000  | 0.00536  | -0.00411 | 0.00659  |
| 170 | H8  | PZ  | 0.00000  | -0.00744 | 0.00000  | 0.00000  | 0.00000  |
| 171 | C10 | S   | -0.02545 | 0.00000  | 0.02968  | -0.04443 | 0.04449  |
| 172 | C10 | S   | 0.01653  | 0.00000  | -0.00211 | -0.03220 | 0.01769  |
| 173 | C10 | PX  | 0.00878  | 0.00000  | -0.05248 | 0.04258  | 0.11738  |
| 174 | C10 | PY  | -0.01191 | 0.00000  | -0.02170 | -0.02955 | 0.09225  |
| 175 | C10 | PZ  | 0.00000  | 0.00777  | 0.00000  | 0.00000  | 0.00000  |
| 176 | C10 | S   | 0.54677  | 0.00000  | -0.98231 | 1.87753  | -1.46032 |
| 177 | C10 | PX  | 0.10742  | 0.00000  | -0.65684 | 0.14316  | 0.97466  |
| 178 | C10 | PY  | 0.17769  | 0.00000  | -0.82302 | 1.30135  | -0.75803 |
| 179 | C10 | PZ  | 0.00000  | -0.00267 | 0.00000  | 0.00000  | 0.00000  |
| 180 | C10 | DXX | 0.00100  | 0.00000  | -0.00952 | 0.01535  | -0.00282 |
| 181 | C10 | DYY | 0.00031  | 0.00000  | 0.00398  | -0.00082 | -0.01286 |
| 182 | C10 | DZZ | -0.00364 | 0.00000  | 0.00568  | -0.01297 | 0.01453  |
| 183 | C10 | DXY | 0.00267  | 0.00000  | 0.00060  | -0.00209 | -0.03097 |
| 184 | C10 | DXZ | 0.00000  | -0.00718 | 0.00000  | 0.00000  | 0.00000  |
| 185 | C10 | DYZ | 0.00000  | -0.00160 | 0.00000  | 0.00000  | 0.00000  |
| 186 | H16 | S   | -0.00833 | 0.00000  | -0.01359 | 0.03327  | 0.05547  |
| 187 | H16 | S   | -0.28533 | 0.00000  | 0.64343  | -0.39870 | -0.50793 |
| 188 | H16 | PX  | 0.00057  | 0.00000  | -0.00465 | 0.00363  | 0.00170  |
| 189 | H16 | PY  | 0.00085  | 0.00000  | -0.00196 | 0.00381  | -0.01337 |
| 190 | H16 | PZ  | 0.00000  | -0.00100 | 0.00000  | 0.00000  | 0.00000  |
| 191 | H18 | S   | 0.00538  | 0.00000  | -0.01133 | 0.02033  | -0.10435 |

|     |     |     |          |          |          |          |          |
|-----|-----|-----|----------|----------|----------|----------|----------|
| 192 | H18 | S   | -0.07874 | 0.00000  | -0.54740 | 0.25181  | 0.81432  |
| 193 | H18 | PX  | 0.00009  | 0.00000  | 0.00015  | -0.00189 | 0.00088  |
| 194 | H18 | PY  | 0.00071  | 0.00000  | -0.00484 | 0.00476  | 0.00495  |
| 195 | H18 | PZ  | 0.00000  | 0.00177  | 0.00000  | 0.00000  | 0.00000  |
| 196 | C9  | S   | 0.06629  | 0.00000  | 0.01687  | -0.01121 | -0.00426 |
| 197 | C9  | S   | -0.04674 | 0.00000  | -0.00452 | 0.02809  | 0.00447  |
| 198 | C9  | PX  | 0.06224  | 0.00000  | 0.05777  | -0.02749 | -0.01684 |
| 199 | C9  | PY  | 0.00726  | 0.00000  | -0.11001 | -0.09268 | -0.05151 |
| 200 | C9  | PZ  | 0.00000  | -0.00915 | 0.00000  | 0.00000  | 0.00000  |
| 201 | C9  | S   | -1.23005 | 0.00000  | -0.41039 | -0.02981 | -0.01542 |
| 202 | C9  | PX  | 0.43694  | 0.00000  | 0.17282  | -0.24373 | -0.34350 |
| 203 | C9  | PY  | 0.33875  | 0.00000  | -0.16857 | -0.31072 | -0.13551 |
| 204 | C9  | PZ  | 0.00000  | -0.03840 | 0.00000  | 0.00000  | 0.00000  |
| 205 | C9  | DXX | 0.00452  | 0.00000  | 0.00826  | -0.00103 | -0.00335 |
| 206 | C9  | DYY | -0.00827 | 0.00000  | -0.01684 | -0.01076 | -0.00509 |
| 207 | C9  | DZZ | 0.00036  | 0.00000  | 0.00607  | 0.00946  | 0.01096  |
| 208 | C9  | DXY | 0.01557  | 0.00000  | 0.00384  | -0.00547 | 0.00396  |
| 209 | C9  | DXZ | 0.00000  | 0.00978  | 0.00000  | 0.00000  | 0.00000  |
| 210 | C9  | DYZ | 0.00000  | -0.00135 | 0.00000  | 0.00000  | 0.00000  |
| 211 | H3  | S   | -0.05470 | 0.00000  | -0.05837 | -0.01757 | -0.01443 |
| 212 | H3  | S   | 0.26943  | 0.00000  | 0.49475  | 0.33937  | 0.12080  |
| 213 | H3  | PX  | 0.00488  | 0.00000  | -0.00053 | -0.00232 | 0.00082  |
| 214 | H3  | PY  | 0.00038  | 0.00000  | -0.00109 | -0.00185 | 0.00060  |
| 215 | H3  | PZ  | 0.00000  | -0.00128 | 0.00000  | 0.00000  | 0.00000  |
| 216 | H5  | S   | -0.00018 | -0.02425 | 0.02426  | 0.03103  | 0.03121  |
| 217 | H5  | S   | 0.42355  | -0.04936 | -0.00432 | 0.04669  | 0.15230  |
| 218 | H5  | PX  | -0.00119 | -0.00174 | 0.00017  | -0.00175 | -0.00341 |
| 219 | H5  | PY  | 0.00677  | -0.00140 | 0.00451  | 0.00206  | 0.00376  |
| 220 | H5  | PZ  | 0.00032  | 0.00117  | 0.00030  | -0.00016 | -0.00210 |
| 221 | H7  | S   | -0.00018 | 0.02425  | 0.02426  | 0.03103  | 0.03121  |
| 222 | H7  | S   | 0.42355  | 0.04936  | -0.00432 | 0.04669  | 0.15230  |
| 223 | H7  | PX  | -0.00119 | 0.00174  | 0.00017  | -0.00175 | -0.00341 |
| 224 | H7  | PY  | 0.00677  | 0.00140  | 0.00451  | 0.00206  | 0.00376  |
| 225 | H7  | PZ  | -0.00032 | 0.00117  | -0.00030 | 0.00016  | 0.00210  |

|              |          |          |          |          |          |
|--------------|----------|----------|----------|----------|----------|
| MO:          | 61       | 62       | 63       | 64       | 65       |
| Eigenvalues: | 0.47510  | 0.48296  | 0.52777  | 0.54410  | 0.58615  |
| (ev):        | 12.92810 | 13.14198 | 14.36134 | 14.80580 | 15.94991 |

|    |    |    |          |          |          |          |          |
|----|----|----|----------|----------|----------|----------|----------|
|    |    | A  | A        | A        | A        | A        |          |
| 1  | H1 | S  | -0.01773 | 0.08117  | -0.00474 | 0.04481  | 0.03253  |
| 2  | H1 | S  | -0.07907 | -0.68322 | 0.24568  | -0.87928 | -0.16288 |
| 3  | H1 | PX | 0.00150  | 0.00787  | 0.00168  | 0.00657  | 0.00202  |
| 4  | H1 | PY | -0.00904 | 0.00954  | -0.00871 | 0.00529  | 0.00188  |
| 5  | H1 | PZ | 0.00000  | 0.00000  | 0.00000  | 0.00000  | 0.00000  |
| 6  | C1 | S  | -0.05204 | -0.03251 | 0.01795  | 0.07163  | 0.01020  |
| 7  | C1 | S  | 0.10016  | 0.06327  | -0.02989 | -0.07724 | -0.10584 |
| 8  | C1 | PX | -0.07915 | -0.01594 | 0.03310  | 0.11134  | 0.10067  |
| 9  | C1 | PY | -0.07970 | 0.06482  | -0.07929 | 0.14171  | -0.12170 |
| 10 | C1 | PZ | 0.00000  | 0.00000  | 0.00000  | 0.00000  | 0.00000  |
| 11 | C1 | S  | 0.22583  | 0.48532  | -0.09553 | -1.94114 | 0.58689  |
| 12 | C1 | PX | 0.48549  | 0.42346  | 0.19227  | 1.38850  | 0.55527  |
| 13 | C1 | PY | -1.79880 | 0.61493  | -1.10533 | 1.07466  | -1.36977 |
| 14 | C1 | PZ | 0.00000  | 0.00000  | 0.00000  | 0.00000  | 0.00000  |

|    |    |     |          |          |          |          |          |
|----|----|-----|----------|----------|----------|----------|----------|
| 15 | C1 | DXX | 0.01855  | 0.02825  | 0.00166  | 0.00854  | -0.00577 |
| 16 | C1 | DYY | -0.02328 | -0.01246 | -0.00047 | 0.00096  | -0.01453 |
| 17 | C1 | DZZ | 0.00364  | -0.00204 | 0.00031  | -0.01194 | 0.00437  |
| 18 | C1 | DXY | -0.01003 | 0.03256  | -0.02318 | 0.01222  | 0.01576  |
| 19 | C1 | DXZ | 0.00000  | 0.00000  | 0.00000  | 0.00000  | 0.00000  |
| 20 | C1 | DYZ | 0.00000  | 0.00000  | 0.00000  | 0.00000  | 0.00000  |
| 21 | C2 | S   | -0.03934 | -0.00378 | 0.00249  | 0.05760  | -0.02396 |
| 22 | C2 | S   | 0.02976  | 0.03759  | -0.00712 | -0.06923 | 0.11587  |
| 23 | C2 | PX  | 0.06595  | 0.00599  | 0.06534  | -0.11388 | 0.13754  |
| 24 | C2 | PY  | -0.06045 | -0.03453 | -0.10230 | -0.15126 | -0.07928 |
| 25 | C2 | PZ  | 0.00000  | 0.00000  | 0.00000  | 0.00000  | 0.00000  |
| 26 | C2 | S   | 1.40739  | 0.09357  | -0.34674 | -2.02289 | -0.66521 |
| 27 | C2 | PX  | 0.56950  | -0.45794 | 0.72472  | -0.85806 | 0.41589  |
| 28 | C2 | PY  | -0.34751 | 0.62066  | -1.49704 | -1.62005 | -1.03943 |
| 29 | C2 | PZ  | 0.00000  | 0.00000  | 0.00000  | 0.00000  | 0.00000  |
| 30 | C2 | DXX | 0.01296  | 0.03857  | -0.02451 | 0.00299  | 0.00291  |
| 31 | C2 | DYY | -0.01229 | -0.01333 | 0.02460  | -0.00642 | 0.01105  |
| 32 | C2 | DZZ | 0.00210  | -0.00445 | -0.00088 | -0.00659 | 0.00232  |
| 33 | C2 | DXY | 0.02635  | 0.00236  | 0.00021  | 0.01397  | -0.00255 |
| 34 | C2 | DXZ | 0.00000  | 0.00000  | 0.00000  | 0.00000  | 0.00000  |
| 35 | C2 | DYZ | 0.00000  | 0.00000  | 0.00000  | 0.00000  | 0.00000  |
| 36 | C3 | S   | 0.09614  | 0.00694  | -0.04060 | -0.05095 | 0.00223  |
| 37 | C3 | S   | -0.11078 | 0.02914  | 0.06789  | 0.03005  | 0.11898  |
| 38 | C3 | PX  | -0.01848 | -0.00388 | 0.03603  | -0.00903 | -0.26456 |
| 39 | C3 | PY  | -0.13630 | -0.04907 | -0.17090 | 0.08226  | -0.03397 |
| 40 | C3 | PZ  | 0.00000  | 0.00000  | 0.00000  | 0.00000  | 0.00000  |
| 41 | C3 | S   | -2.02561 | -0.35604 | 0.48163  | 1.59967  | -0.96161 |
| 42 | C3 | PX  | -0.52808 | -0.32397 | 0.26707  | 0.09379  | -1.65224 |
| 43 | C3 | PY  | -0.94777 | 0.10141  | -1.37569 | 1.06263  | -0.79829 |
| 44 | C3 | PZ  | 0.00000  | 0.00000  | 0.00000  | 0.00000  | 0.00000  |
| 45 | C3 | DXX | 0.00649  | 0.00591  | 0.00326  | 0.02069  | 0.00917  |
| 46 | C3 | DYY | 0.00721  | 0.02196  | -0.00411 | -0.01899 | 0.02476  |
| 47 | C3 | DZZ | -0.01290 | -0.00845 | 0.00264  | 0.00443  | -0.00265 |
| 48 | C3 | DXY | 0.01516  | -0.02840 | 0.02581  | -0.01510 | 0.00023  |
| 49 | C3 | DXZ | 0.00000  | 0.00000  | 0.00000  | 0.00000  | 0.00000  |
| 50 | C3 | DYZ | 0.00000  | 0.00000  | 0.00000  | 0.00000  | 0.00000  |
| 51 | C4 | S   | 0.04553  | 0.05688  | -0.04880 | -0.00162 | -0.09495 |
| 52 | C4 | S   | -0.04705 | -0.05954 | 0.05256  | -0.00283 | -0.10834 |
| 53 | C4 | PX  | 0.09696  | -0.10546 | 0.05535  | 0.02322  | -0.03016 |
| 54 | C4 | PY  | -0.14437 | -0.06721 | -0.08143 | -0.09447 | 0.20541  |
| 55 | C4 | PZ  | 0.00000  | 0.00000  | 0.00000  | 0.00000  | 0.00000  |
| 56 | C4 | S   | -0.24763 | -0.96676 | 1.56054  | 0.80795  | 3.08555  |
| 57 | C4 | PX  | 1.37729  | -0.40272 | 0.16708  | -0.02434 | -0.01136 |
| 58 | C4 | PY  | -0.91973 | -1.10263 | -0.26926 | -1.45530 | 0.83883  |
| 59 | C4 | PZ  | 0.00000  | 0.00000  | 0.00000  | 0.00000  | 0.00000  |
| 60 | C4 | DXX | -0.02005 | 0.00059  | -0.01027 | 0.01216  | -0.03458 |
| 61 | C4 | DYY | 0.02712  | 0.01235  | 0.00698  | -0.00129 | -0.00986 |
| 62 | C4 | DZZ | -0.01104 | -0.01578 | 0.00626  | -0.01108 | 0.02124  |
| 63 | C4 | DXY | -0.02201 | -0.01073 | 0.01206  | 0.03468  | -0.00029 |
| 64 | C4 | DXZ | 0.00000  | 0.00000  | 0.00000  | 0.00000  | 0.00000  |
| 65 | C4 | DYZ | 0.00000  | 0.00000  | 0.00000  | 0.00000  | 0.00000  |
| 66 | C5 | S   | -0.01911 | 0.01967  | -0.01635 | -0.04706 | 0.02919  |
| 67 | C5 | S   | -0.01412 | 0.00173  | 0.04316  | 0.05981  | -0.11302 |
| 68 | C5 | PX  | -0.03766 | 0.01068  | -0.06133 | 0.04961  | -0.17684 |

|     |    |     |          |          |          |          |          |
|-----|----|-----|----------|----------|----------|----------|----------|
| 69  | C5 | PY  | 0.02570  | 0.11736  | -0.12399 | -0.05096 | -0.04245 |
| 70  | C5 | PZ  | 0.00000  | 0.00000  | 0.00000  | 0.00000  | 0.00000  |
| 71  | C5 | S   | 0.89835  | -0.62503 | 0.89532  | 1.68451  | 0.31788  |
| 72  | C5 | PX  | 0.38251  | -0.17501 | -0.87524 | -0.75173 | -0.98379 |
| 73  | C5 | PY  | 1.02999  | 0.75608  | -0.82989 | -1.52085 | -0.78148 |
| 74  | C5 | PZ  | 0.00000  | 0.00000  | 0.00000  | 0.00000  | 0.00000  |
| 75  | C5 | DXX | -0.00080 | 0.00878  | 0.01060  | 0.02569  | -0.01536 |
| 76  | C5 | DYY | 0.01995  | 0.01108  | -0.00681 | -0.00993 | -0.00546 |
| 77  | C5 | DZZ | -0.00813 | -0.00533 | 0.00454  | 0.00163  | -0.00107 |
| 78  | C5 | DXY | -0.02686 | -0.01916 | -0.01165 | -0.02682 | -0.00404 |
| 79  | C5 | DXZ | 0.00000  | 0.00000  | 0.00000  | 0.00000  | 0.00000  |
| 80  | C5 | DYZ | 0.00000  | 0.00000  | 0.00000  | 0.00000  | 0.00000  |
| 81  | C6 | S   | 0.02002  | 0.02239  | 0.00467  | 0.02341  | 0.10547  |
| 82  | C6 | S   | 0.01502  | 0.04382  | 0.02275  | -0.02782 | 0.09962  |
| 83  | C6 | PX  | 0.25979  | -0.07575 | 0.07362  | -0.00992 | -0.01172 |
| 84  | C6 | PY  | -0.05808 | 0.08923  | -0.07377 | 0.04598  | 0.04203  |
| 85  | C6 | PZ  | 0.00000  | 0.00000  | 0.00000  | 0.00000  | 0.00000  |
| 86  | C6 | S   | -0.81762 | -1.23951 | -1.19529 | -0.65108 | -3.76111 |
| 87  | C6 | PX  | 0.63036  | -0.31984 | 0.65913  | -0.04450 | -0.35397 |
| 88  | C6 | PY  | -0.32187 | 1.78064  | -0.49941 | 0.91225  | 1.02233  |
| 89  | C6 | PZ  | 0.00000  | 0.00000  | 0.00000  | 0.00000  | 0.00000  |
| 90  | C6 | DXX | -0.00683 | -0.00154 | 0.02346  | 0.00612  | 0.04088  |
| 91  | C6 | DYY | 0.01192  | 0.01326  | -0.03976 | -0.00892 | 0.01920  |
| 92  | C6 | DZZ | -0.00054 | -0.01071 | 0.00126  | -0.00414 | -0.02311 |
| 93  | C6 | DXY | -0.02335 | 0.00082  | -0.01049 | 0.02067  | 0.00076  |
| 94  | C6 | DXZ | 0.00000  | 0.00000  | 0.00000  | 0.00000  | 0.00000  |
| 95  | C6 | DYZ | 0.00000  | 0.00000  | 0.00000  | 0.00000  | 0.00000  |
| 96  | C7 | S   | -0.01125 | -0.02178 | 0.02257  | 0.03784  | -0.03270 |
| 97  | C7 | S   | 0.04720  | 0.09531  | -0.03054 | -0.08724 | 0.10138  |
| 98  | C7 | PX  | -0.01806 | -0.06477 | 0.02921  | 0.07127  | -0.05166 |
| 99  | C7 | PY  | -0.00005 | 0.12170  | -0.15330 | 0.08486  | 0.00081  |
| 100 | C7 | PZ  | 0.00000  | 0.00000  | 0.00000  | 0.00000  | 0.00000  |
| 101 | C7 | S   | -0.26216 | 0.45077  | -0.54215 | -0.60806 | 0.57534  |
| 102 | C7 | PX  | 0.83536  | -1.09257 | 0.03986  | 0.41070  | 0.17598  |
| 103 | C7 | PY  | 0.75655  | 0.39575  | -1.01105 | 0.20403  | 0.91674  |
| 104 | C7 | PZ  | 0.00000  | 0.00000  | 0.00000  | 0.00000  | 0.00000  |
| 105 | C7 | DXX | 0.01185  | 0.00980  | -0.00647 | -0.02618 | 0.04544  |
| 106 | C7 | DYY | -0.00423 | 0.01103  | 0.00940  | 0.01661  | -0.01266 |
| 107 | C7 | DZZ | -0.00197 | -0.00047 | -0.00363 | -0.00591 | -0.00580 |
| 108 | C7 | DXY | 0.00330  | 0.00132  | -0.03163 | 0.01658  | -0.00189 |
| 109 | C7 | DXZ | 0.00000  | 0.00000  | 0.00000  | 0.00000  | 0.00000  |
| 110 | C7 | DYZ | 0.00000  | 0.00000  | 0.00000  | 0.00000  | 0.00000  |
| 111 | O1 | S   | -0.01467 | -0.03332 | 0.00637  | -0.03129 | 0.04862  |
| 112 | O1 | S   | 0.04246  | 0.01967  | 0.03830  | 0.07527  | -0.03978 |
| 113 | O1 | PX  | -0.04343 | -0.02748 | -0.04231 | -0.10796 | 0.05831  |
| 114 | O1 | PY  | -0.18720 | -0.13956 | -0.01204 | -0.05225 | 0.17749  |
| 115 | O1 | PZ  | 0.00000  | 0.00000  | 0.00000  | 0.00000  | 0.00000  |
| 116 | O1 | S   | 0.18677  | 0.73843  | -0.33207 | 0.42023  | -1.02738 |
| 117 | O1 | PX  | -0.39897 | -0.08056 | -0.15564 | -0.31107 | 0.15489  |
| 118 | O1 | PY  | -0.57329 | -0.59439 | 0.00022  | -0.49095 | 0.79043  |
| 119 | O1 | PZ  | 0.00000  | 0.00000  | 0.00000  | 0.00000  | 0.00000  |
| 120 | O1 | DXX | -0.00265 | -0.01222 | -0.00441 | -0.03151 | 0.00161  |
| 121 | O1 | DYY | -0.00409 | -0.00424 | 0.01465  | 0.02509  | 0.01014  |
| 122 | O1 | DZZ | 0.00663  | -0.02027 | 0.02368  | 0.00830  | 0.03507  |



|     |     |     |          |          |          |          |          |
|-----|-----|-----|----------|----------|----------|----------|----------|
| 123 | O1  | DXY | 0.00061  | 0.00552  | -0.01023 | -0.02932 | 0.00352  |
| 124 | O1  | DXZ | 0.00000  | 0.00000  | 0.00000  | 0.00000  | 0.00000  |
| 125 | O1  | DYZ | 0.00000  | 0.00000  | 0.00000  | 0.00000  | 0.00000  |
| 126 | H4  | S   | 0.09377  | 0.04560  | 0.04104  | 0.06678  | 0.01637  |
| 127 | H4  | S   | -0.53728 | -0.49752 | -0.06686 | 0.10485  | -0.17318 |
| 128 | H4  | PX  | -0.00185 | -0.00518 | -0.00606 | -0.01290 | -0.00155 |
| 129 | H4  | PY  | 0.00988  | 0.00366  | 0.00120  | -0.00484 | 0.00031  |
| 130 | H4  | PZ  | 0.00000  | 0.00000  | 0.00000  | 0.00000  | 0.00000  |
| 131 | N1  | S   | -0.01475 | -0.10286 | -0.01821 | -0.02094 | -0.07347 |
| 132 | N1  | S   | 0.00189  | 0.07644  | -0.00343 | -0.02184 | 0.06399  |
| 133 | N1  | PX  | 0.00418  | -0.01055 | 0.12268  | 0.04550  | 0.00111  |
| 134 | N1  | PY  | -0.01105 | 0.04241  | -0.15597 | 0.02021  | 0.09403  |
| 135 | N1  | PZ  | 0.00000  | 0.00000  | 0.00000  | 0.00000  | 0.00000  |
| 136 | N1  | S   | 0.24538  | 2.95948  | 0.68862  | 0.95415  | 2.32000  |
| 137 | N1  | PX  | -0.08617 | 0.79739  | 0.35084  | 0.09185  | 0.37483  |
| 138 | N1  | PY  | -0.26076 | 0.91515  | 0.12906  | 0.26577  | 0.88851  |
| 139 | N1  | PZ  | 0.00000  | 0.00000  | 0.00000  | 0.00000  | 0.00000  |
| 140 | N1  | DXX | -0.01252 | -0.00417 | -0.00193 | 0.00617  | 0.02221  |
| 141 | N1  | DYY | -0.00919 | 0.00705  | 0.01144  | -0.00851 | 0.00382  |
| 142 | N1  | DZZ | -0.00746 | -0.04170 | -0.01442 | -0.01968 | -0.04726 |
| 143 | N1  | DXY | 0.02107  | 0.00383  | 0.00127  | -0.01608 | -0.00300 |
| 144 | N1  | DXZ | 0.00000  | 0.00000  | 0.00000  | 0.00000  | 0.00000  |
| 145 | N1  | DYZ | 0.00000  | 0.00000  | 0.00000  | 0.00000  | 0.00000  |
| 146 | H6  | S   | 0.06036  | 0.08245  | -0.05009 | 0.02392  | -0.03419 |
| 147 | H6  | S   | 0.04501  | -0.20473 | 0.28476  | -0.72222 | 0.18775  |
| 148 | H6  | PX  | -0.00109 | -0.01195 | 0.00665  | -0.00109 | 0.00096  |
| 149 | H6  | PY  | -0.01214 | 0.00675  | -0.00553 | -0.00438 | -0.00004 |
| 150 | H6  | PZ  | 0.00000  | 0.00000  | 0.00000  | 0.00000  | 0.00000  |
| 151 | C8  | S   | 0.04062  | -0.01025 | 0.01150  | -0.01740 | 0.03269  |
| 152 | C8  | S   | -0.07440 | 0.09966  | -0.01382 | 0.06253  | 0.14759  |
| 153 | C8  | PX  | 0.10261  | 0.09616  | 0.00415  | 0.02044  | -0.05769 |
| 154 | C8  | PY  | 0.04595  | -0.11718 | -0.23509 | 0.18176  | 0.05187  |
| 155 | C8  | PZ  | 0.00000  | 0.00000  | 0.00000  | 0.00000  | 0.00000  |
| 156 | C8  | S   | -0.64914 | 0.61965  | 1.33618  | -0.94051 | -0.97053 |
| 157 | C8  | PX  | 0.51967  | 1.16203  | 0.62629  | 0.34893  | 0.59215  |
| 158 | C8  | PY  | 1.17588  | -1.90945 | -2.55456 | 1.59541  | 0.38489  |
| 159 | C8  | PZ  | 0.00000  | 0.00000  | 0.00000  | 0.00000  | 0.00000  |
| 160 | C8  | DXX | -0.00230 | -0.00226 | 0.02834  | 0.00967  | 0.00479  |
| 161 | C8  | DYY | 0.01651  | 0.02475  | 0.01049  | -0.03782 | 0.05032  |
| 162 | C8  | DZZ | -0.00821 | -0.00618 | -0.01401 | 0.01060  | -0.00741 |
| 163 | C8  | DXY | 0.00268  | -0.00694 | -0.00906 | -0.00510 | -0.00108 |
| 164 | C8  | DXZ | 0.00000  | 0.00000  | 0.00000  | 0.00000  | 0.00000  |
| 165 | C8  | DYZ | 0.00000  | 0.00000  | 0.00000  | 0.00000  | 0.00000  |
| 166 | H8  | S   | -0.01358 | -0.00025 | -0.02129 | -0.06346 | 0.05972  |
| 167 | H8  | S   | -0.60637 | 0.76086  | -0.00929 | -0.12312 | -0.28567 |
| 168 | H8  | PX  | 0.00437  | -0.00308 | -0.00263 | -0.00330 | 0.00844  |
| 169 | H8  | PY  | 0.00316  | -0.00161 | -0.01983 | 0.00634  | -0.00122 |
| 170 | H8  | PZ  | 0.00000  | 0.00000  | 0.00000  | 0.00000  | 0.00000  |
| 171 | C10 | S   | -0.02620 | 0.03057  | 0.03852  | -0.02054 | -0.01809 |
| 172 | C10 | S   | 0.01744  | 0.08944  | 0.05217  | -0.08434 | 0.12118  |
| 173 | C10 | PX  | -0.01972 | -0.04576 | -0.05031 | -0.04050 | -0.00908 |
| 174 | C10 | PY  | 0.05236  | 0.07755  | -0.00535 | -0.10739 | 0.14191  |
| 175 | C10 | PZ  | 0.00000  | 0.00000  | 0.00000  | 0.00000  | 0.00000  |
| 176 | C10 | S   | 0.97343  | -2.03963 | -2.37983 | 1.53269  | 0.21178  |

|     |     |     |          |          |          |          |          |
|-----|-----|-----|----------|----------|----------|----------|----------|
| 177 | C10 | PX  | -0.68963 | -0.06424 | 0.43201  | -0.63449 | -0.39663 |
| 178 | C10 | PY  | 0.85568  | -1.46746 | -2.13990 | 1.22162  | 0.59968  |
| 179 | C10 | PZ  | 0.00000  | 0.00000  | 0.00000  | 0.00000  | 0.00000  |
| 180 | C10 | DXX | 0.00850  | -0.01320 | -0.02036 | -0.00076 | 0.02065  |
| 181 | C10 | DYY | -0.00542 | 0.01529  | 0.00874  | 0.00988  | -0.00186 |
| 182 | C10 | DZZ | -0.00343 | 0.00837  | 0.00586  | -0.01084 | 0.00182  |
| 183 | C10 | DXY | 0.00687  | 0.01541  | 0.01151  | 0.02494  | 0.00813  |
| 184 | C10 | DXZ | 0.00000  | 0.00000  | 0.00000  | 0.00000  | 0.00000  |
| 185 | C10 | DYZ | 0.00000  | 0.00000  | 0.00000  | 0.00000  | 0.00000  |
| 186 | H16 | S   | 0.03144  | -0.08488 | -0.12873 | -0.01860 | 0.04020  |
| 187 | H16 | S   | 0.53310  | 0.18387  | -0.32839 | 0.44565  | 0.39406  |
| 188 | H16 | PX  | -0.00147 | -0.00235 | -0.00207 | -0.00051 | 0.00330  |
| 189 | H16 | PY  | 0.00446  | 0.00299  | 0.00065  | 0.00958  | 0.00705  |
| 190 | H16 | PZ  | 0.00000  | 0.00000  | 0.00000  | 0.00000  | 0.00000  |
| 191 | H18 | S   | 0.01991  | 0.01856  | -0.01808 | 0.11727  | 0.05559  |
| 192 | H18 | S   | -0.13416 | -0.26931 | -0.42409 | -0.14583 | 0.18722  |
| 193 | H18 | PX  | -0.00425 | 0.00396  | 0.00718  | 0.00109  | -0.00356 |
| 194 | H18 | PY  | 0.00150  | -0.01252 | -0.00840 | -0.00553 | -0.00586 |
| 195 | H18 | PZ  | 0.00000  | 0.00000  | 0.00000  | 0.00000  | 0.00000  |
| 196 | C9  | S   | -0.00668 | -0.00359 | -0.00696 | 0.00029  | 0.00156  |
| 197 | C9  | S   | 0.03558  | 0.00617  | -0.01155 | -0.10849 | -0.01571 |
| 198 | C9  | PX  | -0.01194 | -0.06174 | 0.07507  | 0.10599  | 0.09745  |
| 199 | C9  | PY  | -0.12711 | -0.00245 | -0.04630 | 0.08182  | -0.04781 |
| 200 | C9  | PZ  | 0.00000  | 0.00000  | 0.00000  | 0.00000  | 0.00000  |
| 201 | C9  | S   | 0.09365  | 0.01643  | 0.17949  | 0.43624  | -0.13494 |
| 202 | C9  | PX  | -0.67083 | -0.33838 | -0.26582 | -0.55480 | 0.30369  |
| 203 | C9  | PY  | -0.12770 | -0.04943 | -0.16055 | -0.12606 | -0.02117 |
| 204 | C9  | PZ  | 0.00000  | 0.00000  | 0.00000  | 0.00000  | 0.00000  |
| 205 | C9  | DXX | 0.00239  | -0.00590 | 0.00514  | -0.00255 | 0.01364  |
| 206 | C9  | DYY | -0.00294 | 0.00018  | -0.01107 | 0.00291  | -0.02674 |
| 207 | C9  | DZZ | 0.02363  | 0.00705  | 0.00870  | -0.00051 | -0.00168 |
| 208 | C9  | DXY | 0.00886  | 0.00231  | 0.00023  | 0.00065  | 0.00373  |
| 209 | C9  | DXZ | 0.00000  | 0.00000  | 0.00000  | 0.00000  | 0.00000  |
| 210 | C9  | DYZ | 0.00000  | 0.00000  | 0.00000  | 0.00000  | 0.00000  |
| 211 | H3  | S   | -0.02758 | 0.01061  | -0.02617 | 0.02779  | -0.08731 |
| 212 | H3  | S   | 0.13379  | -0.02145 | 0.12081  | -0.14805 | 0.19663  |
| 213 | H3  | PX  | 0.00096  | 0.00193  | -0.00071 | 0.00486  | -0.00263 |
| 214 | H3  | PY  | 0.00539  | 0.00021  | 0.00073  | 0.00278  | -0.00388 |
| 215 | H3  | PZ  | 0.00000  | 0.00000  | 0.00000  | 0.00000  | 0.00000  |
| 216 | H5  | S   | 0.06696  | 0.01545  | 0.04034  | 0.03421  | 0.00744  |
| 217 | H5  | S   | 0.20436  | 0.20742  | -0.03824 | 0.09237  | -0.15246 |
| 218 | H5  | PX  | -0.00484 | -0.00305 | 0.00003  | -0.00025 | 0.00175  |
| 219 | H5  | PY  | 0.00481  | 0.00251  | 0.00344  | 0.00142  | 0.00596  |
| 220 | H5  | PZ  | -0.00295 | -0.00352 | 0.00100  | -0.00204 | 0.00450  |
| 221 | H7  | S   | 0.06696  | 0.01545  | 0.04034  | 0.03421  | 0.00744  |
| 222 | H7  | S   | 0.20436  | 0.20742  | -0.03824 | 0.09237  | -0.15246 |
| 223 | H7  | PX  | -0.00484 | -0.00305 | 0.00003  | -0.00025 | 0.00175  |
| 224 | H7  | PY  | 0.00481  | 0.00251  | 0.00344  | 0.00142  | 0.00596  |
| 225 | H7  | PZ  | 0.00295  | 0.00352  | -0.00100 | 0.00204  | -0.00450 |

|              |          |          |          |          |          |
|--------------|----------|----------|----------|----------|----------|
| MO:          | 66       | 67       | 68       | 69       | 70       |
| Eigenvalues: | 0.62933  | 0.66412  | 0.69372  | 0.70634  | 0.72492  |
| (ev):        | 17.12506 | 18.07154 | 18.87710 | 19.22061 | 19.72606 |

|    |    | A   | A        | A        | A        | A        |          |
|----|----|-----|----------|----------|----------|----------|----------|
| 1  | H1 | S   | -0.02214 | -0.07197 | 0.03058  | 0.02816  | 0.00000  |
| 2  | H1 | S   | 0.05250  | -0.00408 | 0.23581  | -0.00180 | 0.00000  |
| 3  | H1 | PX  | -0.00445 | -0.00779 | -0.00221 | -0.01168 | 0.00000  |
| 4  | H1 | PY  | -0.00326 | 0.01164  | -0.00888 | -0.00437 | 0.00000  |
| 5  | H1 | PZ  | 0.00000  | 0.00000  | 0.00000  | 0.00000  | -0.00499 |
| 6  | C1 | S   | 0.03655  | -0.03055 | 0.00658  | -0.02875 | 0.00000  |
| 7  | C1 | S   | -0.08000 | -0.10018 | -0.15554 | -0.35936 | 0.00000  |
| 8  | C1 | PX  | 0.09606  | 0.03557  | 0.17119  | 0.09098  | 0.00000  |
| 9  | C1 | PY  | -0.04194 | -0.24639 | -0.19094 | 0.14172  | 0.00000  |
| 10 | C1 | PZ  | 0.00000  | 0.00000  | 0.00000  | 0.00000  | -0.39285 |
| 11 | C1 | S   | -1.57939 | 0.97626  | 0.16734  | 0.99055  | 0.00000  |
| 12 | C1 | PX  | 0.79963  | -0.82898 | -0.83062 | -0.13301 | 0.00000  |
| 13 | C1 | PY  | -1.52800 | 1.48799  | 0.87577  | -1.11391 | 0.00000  |
| 14 | C1 | PZ  | 0.00000  | 0.00000  | 0.00000  | 0.00000  | 0.22592  |
| 15 | C1 | DXX | -0.01367 | -0.02354 | 0.00257  | -0.02060 | 0.00000  |
| 16 | C1 | DYY | 0.00703  | -0.01193 | -0.02371 | -0.08736 | 0.00000  |
| 17 | C1 | DZZ | -0.00730 | 0.00724  | -0.00246 | 0.01033  | 0.00000  |
| 18 | C1 | DXY | -0.00222 | 0.00382  | -0.01766 | 0.01736  | 0.00000  |
| 19 | C1 | DXZ | 0.00000  | 0.00000  | 0.00000  | 0.00000  | 0.02037  |
| 20 | C1 | DYZ | 0.00000  | 0.00000  | 0.00000  | 0.00000  | -0.00087 |
| 21 | C2 | S   | 0.05155  | 0.00570  | -0.04356 | 0.00031  | 0.00000  |
| 22 | C2 | S   | -0.05986 | -0.13560 | -0.07273 | -0.39537 | 0.00000  |
| 23 | C2 | PX  | -0.09690 | -0.00643 | 0.02584  | -0.22485 | 0.00000  |
| 24 | C2 | PY  | -0.06147 | -0.23413 | -0.09724 | 0.06433  | 0.00000  |
| 25 | C2 | PZ  | 0.00000  | 0.00000  | 0.00000  | 0.00000  | -0.27615 |
| 26 | C2 | S   | -1.09914 | -0.77693 | 0.78526  | 0.68042  | 0.00000  |
| 27 | C2 | PX  | -1.42402 | 0.35524  | 0.44102  | 0.33207  | 0.00000  |
| 28 | C2 | PY  | 0.49070  | -1.24798 | -1.11538 | 0.94469  | 0.00000  |
| 29 | C2 | PZ  | 0.00000  | 0.00000  | 0.00000  | 0.00000  | 0.22033  |
| 30 | C2 | DXX | 0.03067  | -0.02730 | 0.03461  | -0.05723 | 0.00000  |
| 31 | C2 | DYY | -0.00775 | -0.03370 | -0.06489 | -0.02206 | 0.00000  |
| 32 | C2 | DZZ | -0.01130 | 0.01242  | 0.00784  | -0.00320 | 0.00000  |
| 33 | C2 | DXY | 0.02065  | 0.00031  | 0.01001  | -0.00264 | 0.00000  |
| 34 | C2 | DXZ | 0.00000  | 0.00000  | 0.00000  | 0.00000  | -0.01075 |
| 35 | C2 | DYZ | 0.00000  | 0.00000  | 0.00000  | 0.00000  | -0.01175 |
| 36 | C3 | S   | 0.02226  | 0.06136  | 0.03554  | -0.01333 | 0.00000  |
| 37 | C3 | S   | -0.00940 | -0.08697 | -0.11687 | -0.39652 | 0.00000  |
| 38 | C3 | PX  | -0.02852 | 0.13058  | 0.29684  | -0.04529 | 0.00000  |
| 39 | C3 | PY  | 0.06318  | 0.07251  | -0.05399 | -0.18580 | 0.00000  |
| 40 | C3 | PZ  | 0.00000  | 0.00000  | 0.00000  | 0.00000  | -0.22618 |
| 41 | C3 | S   | -1.97308 | -1.76512 | -0.04394 | 0.34096  | 0.00000  |
| 42 | C3 | PX  | -0.21480 | 0.09130  | 2.22315  | -1.34958 | 0.00000  |
| 43 | C3 | PY  | 0.26489  | 1.89734  | 0.14592  | -0.48129 | 0.00000  |
| 44 | C3 | PZ  | 0.00000  | 0.00000  | 0.00000  | 0.00000  | 0.11839  |
| 45 | C3 | DXX | -0.02034 | -0.02330 | 0.00175  | -0.04372 | 0.00000  |
| 46 | C3 | DYY | -0.01716 | 0.02846  | 0.01091  | -0.07882 | 0.00000  |
| 47 | C3 | DZZ | 0.00792  | -0.01495 | -0.01773 | 0.00983  | 0.00000  |
| 48 | C3 | DXY | 0.00339  | 0.02002  | -0.01651 | -0.05335 | 0.00000  |
| 49 | C3 | DXZ | 0.00000  | 0.00000  | 0.00000  | 0.00000  | -0.00616 |
| 50 | C3 | DYZ | 0.00000  | 0.00000  | 0.00000  | 0.00000  | 0.00257  |
| 51 | C4 | S   | 0.01064  | 0.01230  | -0.04342 | 0.01066  | 0.00000  |
| 52 | C4 | S   | -0.13799 | -0.26770 | -0.13339 | -0.57257 | 0.00000  |
| 53 | C4 | PX  | 0.25538  | -0.13119 | -0.02023 | 0.04503  | 0.00000  |

|     |    |     |          |          |          |          |          |
|-----|----|-----|----------|----------|----------|----------|----------|
| 54  | C4 | PY  | 0.00477  | 0.06809  | 0.06079  | 0.00210  | 0.00000  |
| 55  | C4 | PZ  | 0.00000  | 0.00000  | 0.00000  | 0.00000  | -0.41199 |
| 56  | C4 | S   | 0.52568  | -0.03650 | 0.47506  | 0.62108  | 0.00000  |
| 57  | C4 | PX  | 2.41324  | -1.52799 | -1.07419 | 0.62250  | 0.00000  |
| 58  | C4 | PY  | -0.15601 | 1.15105  | -0.06069 | 0.88991  | 0.00000  |
| 59  | C4 | PZ  | 0.00000  | 0.00000  | 0.00000  | 0.00000  | 0.43417  |
| 60  | C4 | DXX | -0.00784 | -0.03772 | -0.05903 | -0.10070 | 0.00000  |
| 61  | C4 | DYY | -0.00096 | 0.00369  | -0.01822 | 0.01006  | 0.00000  |
| 62  | C4 | DZZ | -0.00708 | 0.00115  | 0.02011  | -0.00551 | 0.00000  |
| 63  | C4 | DXY | 0.03845  | 0.03989  | 0.02946  | -0.00950 | 0.00000  |
| 64  | C4 | DXZ | 0.00000  | 0.00000  | 0.00000  | 0.00000  | -0.00242 |
| 65  | C4 | DYZ | 0.00000  | 0.00000  | 0.00000  | 0.00000  | 0.00718  |
| 66  | C5 | S   | -0.05598 | -0.02694 | 0.03542  | -0.01582 | 0.00000  |
| 67  | C5 | S   | -0.00002 | -0.11995 | -0.26084 | -0.35636 | 0.00000  |
| 68  | C5 | PX  | 0.13229  | 0.00892  | -0.12102 | -0.17820 | 0.00000  |
| 69  | C5 | PY  | 0.05106  | 0.06618  | 0.18002  | 0.00906  | 0.00000  |
| 70  | C5 | PZ  | 0.00000  | 0.00000  | 0.00000  | 0.00000  | -0.30558 |
| 71  | C5 | S   | 1.81306  | 0.70773  | -0.01676 | 0.09647  | 0.00000  |
| 72  | C5 | PX  | 1.40973  | -0.95829 | -1.02646 | 0.79472  | 0.00000  |
| 73  | C5 | PY  | 0.21460  | -1.88406 | -0.58568 | 0.47903  | 0.00000  |
| 74  | C5 | PZ  | 0.00000  | 0.00000  | 0.00000  | 0.00000  | 0.14726  |
| 75  | C5 | DXX | -0.00087 | -0.01195 | -0.01327 | -0.05744 | 0.00000  |
| 76  | C5 | DYY | -0.01680 | -0.04494 | -0.00834 | -0.06544 | 0.00000  |
| 77  | C5 | DZZ | 0.01168  | 0.01265  | -0.01610 | 0.01240  | 0.00000  |
| 78  | C5 | DXY | -0.03489 | -0.01494 | -0.04329 | -0.00335 | 0.00000  |
| 79  | C5 | DXZ | 0.00000  | 0.00000  | 0.00000  | 0.00000  | -0.00456 |
| 80  | C5 | DYZ | 0.00000  | 0.00000  | 0.00000  | 0.00000  | 0.01064  |
| 81  | C6 | S   | -0.03653 | -0.03283 | 0.01811  | -0.00832 | 0.00000  |
| 82  | C6 | S   | 0.10496  | -0.08631 | -0.16880 | -0.38049 | 0.00000  |
| 83  | C6 | PX  | -0.13689 | 0.12932  | 0.23478  | -0.16669 | 0.00000  |
| 84  | C6 | PY  | -0.07563 | -0.11427 | 0.05924  | -0.08941 | 0.00000  |
| 85  | C6 | PZ  | 0.00000  | 0.00000  | 0.00000  | 0.00000  | -0.29158 |
| 86  | C6 | S   | 0.92531  | 1.54867  | -0.28528 | 0.50854  | 0.00000  |
| 87  | C6 | PX  | -0.38031 | 1.08897  | 2.47459  | -1.23598 | 0.00000  |
| 88  | C6 | PY  | 1.50929  | -1.45598 | 1.01888  | -1.08391 | 0.00000  |
| 89  | C6 | PZ  | 0.00000  | 0.00000  | 0.00000  | 0.00000  | 0.19210  |
| 90  | C6 | DXX | 0.00660  | -0.02098 | -0.05345 | -0.07946 | 0.00000  |
| 91  | C6 | DYY | 0.00880  | 0.00861  | 0.03081  | -0.03861 | 0.00000  |
| 92  | C6 | DZZ | 0.00285  | 0.00973  | -0.01247 | 0.00887  | 0.00000  |
| 93  | C6 | DXY | 0.01770  | -0.04577 | -0.01593 | 0.03688  | 0.00000  |
| 94  | C6 | DXZ | 0.00000  | 0.00000  | 0.00000  | 0.00000  | 0.00318  |
| 95  | C6 | DYZ | 0.00000  | 0.00000  | 0.00000  | 0.00000  | 0.00259  |
| 96  | C7 | S   | -0.08098 | -0.02843 | 0.01688  | -0.00638 | 0.00000  |
| 97  | C7 | S   | 0.03392  | 0.18669  | -0.07987 | -0.18399 | 0.00000  |
| 98  | C7 | PX  | -0.17825 | -0.04943 | 0.06137  | -0.03114 | 0.00000  |
| 99  | C7 | PY  | -0.28287 | -0.01273 | 0.22012  | 0.12138  | 0.00000  |
| 100 | C7 | PZ  | 0.00000  | 0.00000  | 0.00000  | 0.00000  | -0.17807 |
| 101 | C7 | S   | 2.42396  | 1.07181  | -0.15627 | 0.19260  | 0.00000  |
| 102 | C7 | PX  | -1.65369 | -1.17378 | 0.00619  | 0.39456  | 0.00000  |
| 103 | C7 | PY  | -0.18954 | 1.16211  | -2.02885 | 0.53314  | 0.00000  |
| 104 | C7 | PZ  | 0.00000  | 0.00000  | 0.00000  | 0.00000  | 0.14268  |
| 105 | C7 | DXX | -0.00594 | 0.03333  | -0.00720 | -0.06447 | 0.00000  |
| 106 | C7 | DYY | 0.00557  | 0.01380  | -0.01127 | -0.00654 | 0.00000  |
| 107 | C7 | DZZ | 0.01011  | 0.00703  | -0.00043 | 0.01090  | 0.00000  |

|     |    |     |          |          |          |          |          |
|-----|----|-----|----------|----------|----------|----------|----------|
| 108 | C7 | DXY | -0.00809 | 0.00469  | 0.00240  | -0.01603 | 0.00000  |
| 109 | C7 | DXZ | 0.00000  | 0.00000  | 0.00000  | 0.00000  | 0.01387  |
| 110 | C7 | DYZ | 0.00000  | 0.00000  | 0.00000  | 0.00000  | -0.00847 |
| 111 | O1 | S   | 0.00035  | 0.00743  | 0.00282  | 0.01571  | 0.00000  |
| 112 | O1 | S   | 0.05550  | 0.09873  | 0.01678  | 0.01763  | 0.00000  |
| 113 | O1 | PX  | 0.01815  | -0.03638 | -0.02659 | 0.09615  | 0.00000  |
| 114 | O1 | PY  | 0.01303  | 0.01645  | 0.04922  | -0.07680 | 0.00000  |
| 115 | O1 | PZ  | 0.00000  | 0.00000  | 0.00000  | 0.00000  | -0.13988 |
| 116 | O1 | S   | -0.36978 | -0.67935 | -0.12198 | -0.64793 | 0.00000  |
| 117 | O1 | PX  | -0.36442 | 0.17322  | 0.09971  | 0.04986  | 0.00000  |
| 118 | O1 | PY  | 0.01300  | 0.35598  | 0.10212  | 0.31482  | 0.00000  |
| 119 | O1 | PZ  | 0.00000  | 0.00000  | 0.00000  | 0.00000  | -0.19079 |
| 120 | O1 | DXX | -0.02116 | 0.01907  | -0.01436 | 0.02425  | 0.00000  |
| 121 | O1 | DYY | 0.00209  | 0.01886  | 0.02380  | -0.05204 | 0.00000  |
| 122 | O1 | DZZ | 0.03612  | 0.05265  | 0.01877  | 0.04502  | 0.00000  |
| 123 | O1 | DXY | -0.04706 | -0.02459 | -0.01460 | -0.01036 | 0.00000  |
| 124 | O1 | DXZ | 0.00000  | 0.00000  | 0.00000  | 0.00000  | -0.00899 |
| 125 | O1 | DYZ | 0.00000  | 0.00000  | 0.00000  | 0.00000  | 0.02841  |
| 126 | H4 | S   | 0.02488  | -0.01376 | 0.15678  | -0.08690 | 0.00000  |
| 127 | H4 | S   | 0.13576  | 0.20434  | -0.39925 | 0.01694  | 0.00000  |
| 128 | H4 | PX  | -0.00151 | 0.00100  | -0.00317 | 0.01977  | 0.00000  |
| 129 | H4 | PY  | -0.00169 | -0.01227 | 0.00336  | -0.00776 | 0.00000  |
| 130 | H4 | PZ  | 0.00000  | 0.00000  | 0.00000  | 0.00000  | -0.00546 |
| 131 | N1 | S   | 0.00037  | -0.00751 | 0.01717  | 0.00856  | 0.00000  |
| 132 | N1 | S   | -0.01053 | 0.02781  | -0.01378 | 0.03161  | 0.00000  |
| 133 | N1 | PX  | -0.07537 | 0.15298  | -0.16694 | 0.11491  | 0.00000  |
| 134 | N1 | PY  | 0.07414  | -0.13387 | 0.22944  | -0.06660 | 0.00000  |
| 135 | N1 | PZ  | 0.00000  | 0.00000  | 0.00000  | 0.00000  | -0.03543 |
| 136 | N1 | S   | 0.65280  | -0.39675 | -0.67569 | -0.53338 | 0.00000  |
| 137 | N1 | PX  | 0.22740  | 0.41545  | -1.46898 | 0.48381  | 0.00000  |
| 138 | N1 | PY  | 0.41532  | -1.13591 | 1.23094  | -0.69583 | 0.00000  |
| 139 | N1 | PZ  | 0.00000  | 0.00000  | 0.00000  | 0.00000  | 0.00351  |
| 140 | N1 | DXX | -0.01076 | -0.01901 | -0.02025 | 0.01571  | 0.00000  |
| 141 | N1 | DYY | 0.04433  | -0.01309 | -0.01710 | -0.00450 | 0.00000  |
| 142 | N1 | DZZ | -0.01398 | 0.01130  | 0.02366  | 0.03036  | 0.00000  |
| 143 | N1 | DXY | -0.01530 | 0.03447  | 0.03130  | -0.02522 | 0.00000  |
| 144 | N1 | DXZ | 0.00000  | 0.00000  | 0.00000  | 0.00000  | -0.00634 |
| 145 | N1 | DYZ | 0.00000  | 0.00000  | 0.00000  | 0.00000  | -0.02011 |
| 146 | H6 | S   | 0.15257  | -0.03793 | 0.08113  | -0.04443 | 0.00000  |
| 147 | H6 | S   | -0.60046 | 0.02456  | -0.23432 | 0.20497  | 0.00000  |
| 148 | H6 | PX  | -0.01503 | 0.00972  | -0.00346 | 0.01852  | 0.00000  |
| 149 | H6 | PY  | 0.00050  | 0.00359  | 0.00859  | 0.00093  | 0.00000  |
| 150 | H6 | PZ  | 0.00000  | 0.00000  | 0.00000  | 0.00000  | -0.00289 |
| 151 | C8 | S   | 0.04083  | 0.05874  | -0.04585 | 0.00097  | 0.00000  |
| 152 | C8 | S   | 0.00181  | 0.00842  | -0.21833 | -0.10959 | 0.00000  |
| 153 | C8 | PX  | -0.16341 | 0.31643  | -0.11036 | -0.05228 | 0.00000  |
| 154 | C8 | PY  | -0.11161 | -0.09029 | 0.00942  | -0.03201 | 0.00000  |
| 155 | C8 | PZ  | 0.00000  | 0.00000  | 0.00000  | 0.00000  | -0.10566 |
| 156 | C8 | S   | -1.10207 | -0.69664 | 1.26873  | 0.17717  | 0.00000  |
| 157 | C8 | PX  | -0.98769 | 1.12815  | -2.50200 | 1.01674  | 0.00000  |
| 158 | C8 | PY  | -1.50762 | -0.48600 | -0.26252 | -0.14141 | 0.00000  |
| 159 | C8 | PZ  | 0.00000  | 0.00000  | 0.00000  | 0.00000  | 0.03593  |
| 160 | C8 | DXX | -0.00384 | 0.01772  | -0.05363 | 0.00350  | 0.00000  |
| 161 | C8 | DYY | 0.01558  | 0.04752  | -0.02548 | -0.04971 | 0.00000  |

|     |     |     |          |          |          |          |          |
|-----|-----|-----|----------|----------|----------|----------|----------|
| 162 | C8  | DZZ | -0.01133 | -0.02715 | 0.02500  | 0.00347  | 0.00000  |
| 163 | C8  | DXY | 0.05242  | -0.01123 | -0.03516 | -0.00576 | 0.00000  |
| 164 | C8  | DXZ | 0.00000  | 0.00000  | 0.00000  | 0.00000  | -0.00635 |
| 165 | C8  | DYZ | 0.00000  | 0.00000  | 0.00000  | 0.00000  | 0.00346  |
| 166 | H8  | S   | -0.07205 | 0.06647  | 0.03516  | -0.15878 | 0.00000  |
| 167 | H8  | S   | 0.69414  | 0.60993  | -0.08608 | -0.14436 | 0.00000  |
| 168 | H8  | PX  | -0.00559 | 0.00214  | 0.00129  | -0.00885 | 0.00000  |
| 169 | H8  | PY  | -0.00811 | 0.01047  | -0.00283 | -0.00413 | 0.00000  |
| 170 | H8  | PZ  | 0.00000  | 0.00000  | 0.00000  | 0.00000  | -0.00181 |
| 171 | C10 | S   | -0.00273 | -0.00509 | 0.00237  | 0.00374  | 0.00000  |
| 172 | C10 | S   | 0.04547  | 0.17485  | -0.17768 | -0.07142 | 0.00000  |
| 173 | C10 | PX  | 0.10144  | 0.04493  | -0.09694 | -0.05289 | 0.00000  |
| 174 | C10 | PY  | 0.03960  | 0.18831  | -0.07058 | -0.10797 | 0.00000  |
| 175 | C10 | PZ  | 0.00000  | 0.00000  | 0.00000  | 0.00000  | -0.11684 |
| 176 | C10 | S   | -0.65557 | -0.53620 | 0.14951  | -0.17203 | 0.00000  |
| 177 | C10 | PX  | 0.68870  | -0.59696 | 1.17864  | -0.14487 | 0.00000  |
| 178 | C10 | PY  | -0.17063 | -0.53273 | -0.13276 | -0.11814 | 0.00000  |
| 179 | C10 | PZ  | 0.00000  | 0.00000  | 0.00000  | 0.00000  | 0.11198  |
| 180 | C10 | DXX | 0.02773  | 0.01325  | -0.04470 | -0.01408 | 0.00000  |
| 181 | C10 | DYY | -0.02183 | 0.01269  | -0.02594 | 0.00920  | 0.00000  |
| 182 | C10 | DZZ | -0.00170 | 0.00363  | 0.01386  | -0.00427 | 0.00000  |
| 183 | C10 | DXY | -0.05939 | 0.01035  | -0.01548 | 0.02653  | 0.00000  |
| 184 | C10 | DXZ | 0.00000  | 0.00000  | 0.00000  | 0.00000  | 0.00302  |
| 185 | C10 | DYZ | 0.00000  | 0.00000  | 0.00000  | 0.00000  | -0.00918 |
| 186 | H16 | S   | 0.15829  | 0.01980  | -0.08961 | -0.10939 | 0.00000  |
| 187 | H16 | S   | -0.59553 | 0.38825  | -0.67956 | 0.11663  | 0.00000  |
| 188 | H16 | PX  | 0.00278  | -0.00496 | 0.00202  | -0.00126 | 0.00000  |
| 189 | H16 | PY  | -0.01224 | -0.00336 | -0.00985 | 0.01239  | 0.00000  |
| 190 | H16 | PZ  | 0.00000  | 0.00000  | 0.00000  | 0.00000  | -0.00109 |
| 191 | H18 | S   | -0.15292 | -0.03680 | -0.09506 | 0.10254  | 0.00000  |
| 192 | H18 | S   | 0.53293  | -0.39746 | 0.38803  | -0.21731 | 0.00000  |
| 193 | H18 | PX  | -0.00288 | -0.01181 | 0.01311  | 0.00578  | 0.00000  |
| 194 | H18 | PY  | 0.01580  | -0.00276 | 0.01319  | -0.00409 | 0.00000  |
| 195 | H18 | PZ  | 0.00000  | 0.00000  | 0.00000  | 0.00000  | -0.00191 |
| 196 | C9  | S   | 0.01261  | 0.00283  | -0.00050 | 0.00303  | 0.00000  |
| 197 | C9  | S   | -0.13042 | -0.08604 | -0.04005 | 0.01314  | 0.00000  |
| 198 | C9  | PX  | 0.25695  | 0.05664  | 0.06748  | 0.09728  | 0.00000  |
| 199 | C9  | PY  | 0.04496  | 0.21855  | 0.09266  | -0.08915 | 0.00000  |
| 200 | C9  | PZ  | 0.00000  | 0.00000  | 0.00000  | 0.00000  | -0.38886 |
| 201 | C9  | S   | 0.32476  | 0.14383  | 0.07442  | -0.10641 | 0.00000  |
| 202 | C9  | PX  | -0.44834 | 0.18276  | 0.00504  | -0.01005 | 0.00000  |
| 203 | C9  | PY  | 0.08864  | -0.28389 | -0.20948 | 0.28886  | 0.00000  |
| 204 | C9  | PZ  | 0.00000  | 0.00000  | 0.00000  | 0.00000  | 1.03858  |
| 205 | C9  | DXX | 0.00789  | -0.01342 | 0.00167  | -0.00501 | 0.00000  |
| 206 | C9  | DYY | 0.00117  | 0.03289  | 0.00637  | 0.00875  | 0.00000  |
| 207 | C9  | DZZ | -0.00274 | -0.03287 | -0.01374 | 0.00322  | 0.00000  |
| 208 | C9  | DXY | 0.02187  | -0.00638 | -0.00907 | 0.03039  | 0.00000  |
| 209 | C9  | DXZ | 0.00000  | 0.00000  | 0.00000  | 0.00000  | -0.03675 |
| 210 | C9  | DYZ | 0.00000  | 0.00000  | 0.00000  | 0.00000  | 0.03229  |
| 211 | H3  | S   | -0.01668 | 0.14942  | 0.05198  | -0.04958 | 0.00000  |
| 212 | H3  | S   | -0.18083 | -0.07693 | 0.04829  | -0.11050 | 0.00000  |
| 213 | H3  | PX  | 0.00844  | 0.00414  | -0.00012 | 0.00635  | 0.00000  |
| 214 | H3  | PY  | 0.00756  | -0.00473 | -0.00342 | 0.00914  | 0.00000  |
| 215 | H3  | PZ  | 0.00000  | 0.00000  | 0.00000  | 0.00000  | 0.01690  |

|     |    |    |          |          |          |          |          |
|-----|----|----|----------|----------|----------|----------|----------|
| 216 | H5 | S  | 0.04061  | -0.07852 | -0.01623 | -0.00513 | 0.26634  |
| 217 | H5 | S  | 0.01372  | -0.11491 | -0.06462 | 0.03506  | 0.28097  |
| 218 | H5 | PX | -0.00073 | 0.00428  | 0.00346  | -0.00686 | -0.00126 |
| 219 | H5 | PY | 0.00601  | -0.01022 | -0.00381 | 0.00692  | 0.00358  |
| 220 | H5 | PZ | 0.00290  | 0.00534  | 0.00467  | 0.00492  | 0.01944  |
| 221 | H7 | S  | 0.04061  | -0.07852 | -0.01623 | -0.00513 | -0.26634 |
| 222 | H7 | S  | 0.01372  | -0.11491 | -0.06462 | 0.03506  | -0.28097 |
| 223 | H7 | PX | -0.00073 | 0.00428  | 0.00346  | -0.00686 | 0.00126  |
| 224 | H7 | PY | 0.00601  | -0.01022 | -0.00381 | 0.00692  | -0.00358 |
| 225 | H7 | PZ | -0.00290 | -0.00534 | -0.00467 | -0.00492 | 0.01944  |

|              |          |          |          |          |          |
|--------------|----------|----------|----------|----------|----------|
| MO:          | 71       | 72       | 73       | 74       | 75       |
| Eigenvalues: | 0.74659  | 0.74936  | 0.75623  | 0.77139  | 0.78976  |
| (ev):        | 20.31564 | 20.39120 | 20.57810 | 20.99055 | 21.49039 |

|    |    |     |          |          |          |          |          |
|----|----|-----|----------|----------|----------|----------|----------|
|    |    | A   | A        | A        | A        | A        |          |
| 1  | H1 | S   | 0.00000  | 0.01786  | 0.04667  | 0.00000  | -0.33877 |
| 2  | H1 | S   | 0.00000  | 0.25864  | 0.15780  | 0.00000  | -0.38812 |
| 3  | H1 | PX  | 0.00000  | 0.01043  | 0.00589  | 0.00000  | -0.01791 |
| 4  | H1 | PY  | 0.00000  | 0.00294  | 0.00165  | 0.00000  | 0.00102  |
| 5  | H1 | PZ  | -0.00619 | 0.00000  | 0.00000  | -0.00128 | 0.00000  |
| 6  | C1 | S   | 0.00000  | 0.00295  | -0.00666 | 0.00000  | -0.04424 |
| 7  | C1 | S   | 0.00000  | 0.18971  | 0.22697  | 0.00000  | -0.21474 |
| 8  | C1 | PX  | 0.00000  | -0.08825 | 0.01120  | 0.00000  | -0.08771 |
| 9  | C1 | PY  | 0.00000  | -0.14588 | -0.34666 | 0.00000  | -0.13472 |
| 10 | C1 | PZ  | -0.13790 | 0.00000  | 0.00000  | -0.02067 | 0.00000  |
| 11 | C1 | S   | 0.00000  | -0.18013 | -0.66310 | 0.00000  | 0.58356  |
| 12 | C1 | PX  | 0.00000  | 0.25814  | -0.01426 | 0.00000  | 0.53620  |
| 13 | C1 | PY  | 0.00000  | -0.97803 | -0.16037 | 0.00000  | -0.33202 |
| 14 | C1 | PZ  | 0.15321  | 0.00000  | 0.00000  | -0.00236 | 0.00000  |
| 15 | C1 | DXX | 0.00000  | 0.01825  | 0.04551  | 0.00000  | -0.07313 |
| 16 | C1 | DYY | 0.00000  | 0.03195  | -0.00609 | 0.00000  | -0.07239 |
| 17 | C1 | DZZ | 0.00000  | 0.00304  | 0.01334  | 0.00000  | 0.03701  |
| 18 | C1 | DXY | 0.00000  | 0.00163  | -0.01295 | 0.00000  | -0.02663 |
| 19 | C1 | DXZ | -0.00189 | 0.00000  | 0.00000  | 0.00180  | 0.00000  |
| 20 | C1 | DYZ | -0.00764 | 0.00000  | 0.00000  | -0.00743 | 0.00000  |
| 21 | C2 | S   | 0.00000  | -0.03906 | 0.06265  | 0.00000  | 0.00416  |
| 22 | C2 | S   | 0.00000  | -0.13306 | 0.00410  | 0.00000  | 0.14159  |
| 23 | C2 | PX  | 0.00000  | 0.10459  | -0.25475 | 0.00000  | 0.11007  |
| 24 | C2 | PY  | 0.00000  | -0.23276 | 0.30301  | 0.00000  | -0.14977 |
| 25 | C2 | PZ  | -0.26567 | 0.00000  | 0.00000  | -0.36375 | 0.00000  |
| 26 | C2 | S   | 0.00000  | 1.01820  | -0.42117 | 0.00000  | -0.10384 |
| 27 | C2 | PX  | 0.00000  | 0.06812  | -0.25035 | 0.00000  | -0.08450 |
| 28 | C2 | PY  | 0.00000  | 2.22504  | -0.70717 | 0.00000  | 0.29131  |
| 29 | C2 | PZ  | 0.18913  | 0.00000  | 0.00000  | 0.33126  | 0.00000  |
| 30 | C2 | DXX | 0.00000  | -0.05115 | 0.05102  | 0.00000  | 0.01539  |
| 31 | C2 | DYY | 0.00000  | -0.03044 | 0.05394  | 0.00000  | 0.05213  |
| 32 | C2 | DZZ | 0.00000  | 0.02321  | -0.05306 | 0.00000  | -0.01351 |
| 33 | C2 | DXY | 0.00000  | -0.01454 | -0.01605 | 0.00000  | -0.00792 |
| 34 | C2 | DXZ | -0.01662 | 0.00000  | 0.00000  | -0.01358 | 0.00000  |
| 35 | C2 | DYZ | -0.01218 | 0.00000  | 0.00000  | -0.02867 | 0.00000  |
| 36 | C3 | S   | 0.00000  | -0.01941 | 0.07731  | 0.00000  | 0.00138  |
| 37 | C3 | S   | 0.00000  | 0.17429  | 0.22161  | 0.00000  | -0.15355 |
| 38 | C3 | PX  | 0.00000  | -0.03611 | 0.17400  | 0.00000  | -0.26829 |

|    |    |     |          |          |          |          |          |
|----|----|-----|----------|----------|----------|----------|----------|
| 39 | C3 | PY  | 0.00000  | -0.06865 | -0.12336 | 0.00000  | -0.23862 |
| 40 | C3 | PZ  | -0.26519 | 0.00000  | 0.00000  | -0.02789 | 0.00000  |
| 41 | C3 | S   | 0.00000  | 1.50361  | -1.29506 | 0.00000  | 0.25350  |
| 42 | C3 | PX  | 0.00000  | -0.97332 | -0.15550 | 0.00000  | -0.03327 |
| 43 | C3 | PY  | 0.00000  | -1.65632 | 0.65957  | 0.00000  | -0.42889 |
| 44 | C3 | PZ  | 0.14269  | 0.00000  | 0.00000  | 0.06319  | 0.00000  |
| 45 | C3 | DXX | 0.00000  | 0.00466  | 0.08622  | 0.00000  | -0.02192 |
| 46 | C3 | DYY | 0.00000  | 0.06131  | 0.07520  | 0.00000  | 0.00199  |
| 47 | C3 | DZZ | 0.00000  | -0.00113 | -0.05252 | 0.00000  | -0.00482 |
| 48 | C3 | DXY | 0.00000  | 0.01593  | 0.00006  | 0.00000  | 0.05169  |
| 49 | C3 | DXZ | -0.00580 | 0.00000  | 0.00000  | 0.01678  | 0.00000  |
| 50 | C3 | DYZ | 0.02275  | 0.00000  | 0.00000  | -0.01582 | 0.00000  |
| 51 | C4 | S   | 0.00000  | 0.03318  | -0.00644 | 0.00000  | 0.02109  |
| 52 | C4 | S   | 0.00000  | -0.11281 | -0.16887 | 0.00000  | -0.45775 |
| 53 | C4 | PX  | 0.00000  | 0.16508  | 0.00585  | 0.00000  | -0.16318 |
| 54 | C4 | PY  | 0.00000  | -0.08252 | -0.12508 | 0.00000  | -0.28989 |
| 55 | C4 | PZ  | -0.00708 | 0.00000  | 0.00000  | -0.21618 | 0.00000  |
| 56 | C4 | S   | 0.00000  | 0.33029  | 0.27333  | 0.00000  | 0.98382  |
| 57 | C4 | PX  | 0.00000  | 0.80911  | 0.61746  | 0.00000  | 0.40337  |
| 58 | C4 | PY  | 0.00000  | -0.19591 | 0.52436  | 0.00000  | 0.08768  |
| 59 | C4 | PZ  | -0.11190 | 0.00000  | 0.00000  | 0.15656  | 0.00000  |
| 60 | C4 | DXX | 0.00000  | 0.04429  | -0.06945 | 0.00000  | -0.02809 |
| 61 | C4 | DYY | 0.00000  | 0.00771  | 0.01824  | 0.00000  | 0.01041  |
| 62 | C4 | DZZ | 0.00000  | -0.02975 | 0.00185  | 0.00000  | -0.02739 |
| 63 | C4 | DXY | 0.00000  | 0.04418  | 0.02322  | 0.00000  | 0.00091  |
| 64 | C4 | DXZ | -0.01448 | 0.00000  | 0.00000  | 0.00587  | 0.00000  |
| 65 | C4 | DYZ | 0.00626  | 0.00000  | 0.00000  | -0.00011 | 0.00000  |
| 66 | C5 | S   | 0.00000  | -0.02105 | -0.01475 | 0.00000  | -0.00715 |
| 67 | C5 | S   | 0.00000  | -0.00781 | 0.20775  | 0.00000  | 0.07749  |
| 68 | C5 | PX  | 0.00000  | 0.35951  | -0.15337 | 0.00000  | 0.08008  |
| 69 | C5 | PY  | 0.00000  | 0.25831  | -0.22839 | 0.00000  | -0.07583 |
| 70 | C5 | PZ  | -0.27032 | 0.00000  | 0.00000  | -0.39111 | 0.00000  |
| 71 | C5 | S   | 0.00000  | -1.24815 | 0.70698  | 0.00000  | -0.12047 |
| 72 | C5 | PX  | 0.00000  | 0.38958  | 0.63800  | 0.00000  | -0.18167 |
| 73 | C5 | PY  | 0.00000  | 1.00719  | -0.09551 | 0.00000  | 0.27317  |
| 74 | C5 | PZ  | 0.25202  | 0.00000  | 0.00000  | 0.32177  | 0.00000  |
| 75 | C5 | DXX | 0.00000  | -0.04017 | 0.03173  | 0.00000  | 0.01751  |
| 76 | C5 | DYY | 0.00000  | -0.04493 | 0.01267  | 0.00000  | -0.02845 |
| 77 | C5 | DZZ | 0.00000  | 0.03737  | 0.00331  | 0.00000  | 0.01220  |
| 78 | C5 | DXY | 0.00000  | 0.00702  | 0.01479  | 0.00000  | -0.00973 |
| 79 | C5 | DXZ | 0.00728  | 0.00000  | 0.00000  | -0.00680 | 0.00000  |
| 80 | C5 | DYZ | 0.01995  | 0.00000  | 0.00000  | 0.02882  | 0.00000  |
| 81 | C6 | S   | 0.00000  | 0.02909  | -0.07405 | 0.00000  | 0.02788  |
| 82 | C6 | S   | 0.00000  | -0.11572 | 0.37076  | 0.00000  | 0.29849  |
| 83 | C6 | PX  | 0.00000  | -0.06517 | 0.04683  | 0.00000  | -0.03619 |
| 84 | C6 | PY  | 0.00000  | 0.03806  | 0.30733  | 0.00000  | 0.09183  |
| 85 | C6 | PZ  | -0.28922 | 0.00000  | 0.00000  | -0.04337 | 0.00000  |
| 86 | C6 | S   | 0.00000  | -0.03697 | -0.07768 | 0.00000  | -1.23083 |
| 87 | C6 | PX  | 0.00000  | -1.69422 | 0.31665  | 0.00000  | -0.22166 |
| 88 | C6 | PY  | 0.00000  | -0.63205 | 0.10215  | 0.00000  | 0.55391  |
| 89 | C6 | PZ  | 0.21552  | 0.00000  | 0.00000  | -0.03109 | 0.00000  |
| 90 | C6 | DXX | 0.00000  | 0.02883  | 0.00062  | 0.00000  | 0.09978  |
| 91 | C6 | DYY | 0.00000  | -0.01194 | -0.01906 | 0.00000  | -0.00828 |
| 92 | C6 | DZZ | 0.00000  | -0.01264 | 0.04237  | 0.00000  | -0.01246 |



|     |    |     |          |          |          |          |          |
|-----|----|-----|----------|----------|----------|----------|----------|
| 93  | C6 | DXY | 0.00000  | -0.03877 | 0.03541  | 0.00000  | -0.00772 |
| 94  | C6 | DXZ | 0.00153  | 0.00000  | 0.00000  | -0.00610 | 0.00000  |
| 95  | C6 | DYZ | 0.00090  | 0.00000  | 0.00000  | -0.01170 | 0.00000  |
| 96  | C7 | S   | 0.00000  | 0.05252  | -0.00042 | 0.00000  | -0.00480 |
| 97  | C7 | S   | 0.00000  | 0.03147  | 0.25086  | 0.00000  | -0.27617 |
| 98  | C7 | PX  | 0.00000  | 0.10139  | -0.03520 | 0.00000  | 0.01647  |
| 99  | C7 | PY  | 0.00000  | 0.15158  | 0.36029  | 0.00000  | -0.12944 |
| 100 | C7 | PZ  | -0.31421 | 0.00000  | 0.00000  | 0.46153  | 0.00000  |
| 101 | C7 | S   | 0.00000  | -1.89340 | 0.57830  | 0.00000  | 0.23888  |
| 102 | C7 | PX  | 0.00000  | 1.61096  | -0.39612 | 0.00000  | 0.30806  |
| 103 | C7 | PY  | 0.00000  | -0.05182 | -0.08851 | 0.00000  | 0.03717  |
| 104 | C7 | PZ  | 0.26234  | 0.00000  | 0.00000  | -0.38629 | 0.00000  |
| 105 | C7 | DXX | 0.00000  | 0.06418  | 0.04741  | 0.00000  | -0.01315 |
| 106 | C7 | DYY | 0.00000  | -0.02643 | 0.04027  | 0.00000  | -0.04424 |
| 107 | C7 | DZZ | 0.00000  | -0.02317 | -0.01778 | 0.00000  | -0.00934 |
| 108 | C7 | DXY | 0.00000  | -0.01101 | 0.01148  | 0.00000  | -0.01733 |
| 109 | C7 | DXZ | 0.02040  | 0.00000  | 0.00000  | -0.01090 | 0.00000  |
| 110 | C7 | DYZ | -0.01302 | 0.00000  | 0.00000  | 0.00037  | 0.00000  |
| 111 | O1 | S   | 0.00000  | -0.01422 | 0.00294  | 0.00000  | -0.01105 |
| 112 | O1 | S   | 0.00000  | 0.11774  | 0.00883  | 0.00000  | 0.07925  |
| 113 | O1 | PX  | 0.00000  | 0.15663  | 0.11156  | 0.00000  | -0.08539 |
| 114 | O1 | PY  | 0.00000  | -0.02240 | -0.01012 | 0.00000  | -0.08217 |
| 115 | O1 | PZ  | 0.10989  | 0.00000  | 0.00000  | 0.01526  | 0.00000  |
| 116 | O1 | S   | 0.00000  | -0.38667 | -0.41096 | 0.00000  | -0.12953 |
| 117 | O1 | PX  | 0.00000  | -0.17666 | -0.08784 | 0.00000  | -0.03609 |
| 118 | O1 | PY  | 0.00000  | -0.09418 | 0.19575  | 0.00000  | 0.09936  |
| 119 | O1 | PZ  | 0.17474  | 0.00000  | 0.00000  | 0.03723  | 0.00000  |
| 120 | O1 | DXX | 0.00000  | -0.03103 | -0.01722 | 0.00000  | 0.06269  |
| 121 | O1 | DYY | 0.00000  | -0.00555 | -0.04652 | 0.00000  | -0.05735 |
| 122 | O1 | DZZ | 0.00000  | 0.05339  | 0.02973  | 0.00000  | 0.03499  |
| 123 | O1 | DXY | 0.00000  | -0.07272 | -0.03263 | 0.00000  | 0.00006  |
| 124 | O1 | DXZ | 0.01078  | 0.00000  | 0.00000  | -0.00032 | 0.00000  |
| 125 | O1 | DYZ | -0.01093 | 0.00000  | 0.00000  | 0.00823  | 0.00000  |
| 126 | H4 | S   | 0.00000  | -0.17371 | 0.01827  | 0.00000  | -0.07669 |
| 127 | H4 | S   | 0.00000  | -0.04965 | 0.29580  | 0.00000  | -0.15551 |
| 128 | H4 | PX  | 0.00000  | 0.01262  | 0.01047  | 0.00000  | -0.00451 |
| 129 | H4 | PY  | 0.00000  | -0.01004 | 0.00841  | 0.00000  | -0.00030 |
| 130 | H4 | PZ  | -0.00373 | 0.00000  | 0.00000  | -0.00125 | 0.00000  |
| 131 | N1 | S   | 0.00000  | 0.00707  | -0.00164 | 0.00000  | -0.00874 |
| 132 | N1 | S   | 0.00000  | 0.01531  | -0.09166 | 0.00000  | 0.02701  |
| 133 | N1 | PX  | 0.00000  | -0.10136 | -0.01403 | 0.00000  | -0.15133 |
| 134 | N1 | PY  | 0.00000  | -0.04224 | -0.13857 | 0.00000  | -0.01193 |
| 135 | N1 | PZ  | -0.08089 | 0.00000  | 0.00000  | 0.08546  | 0.00000  |
| 136 | N1 | S   | 0.00000  | -0.76198 | 0.52654  | 0.00000  | 0.57432  |
| 137 | N1 | PX  | 0.00000  | 0.06385  | 0.12382  | 0.00000  | -0.01809 |
| 138 | N1 | PY  | 0.00000  | -0.31884 | 0.30071  | 0.00000  | 0.57721  |
| 139 | N1 | PZ  | 0.00180  | 0.00000  | 0.00000  | 0.02094  | 0.00000  |
| 140 | N1 | DXX | 0.00000  | 0.02142  | 0.00522  | 0.00000  | 0.03358  |
| 141 | N1 | DYY | 0.00000  | -0.02578 | -0.00933 | 0.00000  | 0.02857  |
| 142 | N1 | DZZ | 0.00000  | 0.01694  | -0.02578 | 0.00000  | -0.01779 |
| 143 | N1 | DXY | 0.00000  | 0.01225  | -0.02550 | 0.00000  | -0.01648 |
| 144 | N1 | DXZ | -0.00808 | 0.00000  | 0.00000  | -0.00045 | 0.00000  |
| 145 | N1 | DYZ | -0.01897 | 0.00000  | 0.00000  | 0.00181  | 0.00000  |
| 146 | H6 | S   | 0.00000  | -0.17789 | 0.17405  | 0.00000  | -0.01821 |

|     |     |     |          |          |          |          |          |
|-----|-----|-----|----------|----------|----------|----------|----------|
| 147 | H6  | S   | 0.00000  | 0.31468  | -0.27155 | 0.00000  | 0.08003  |
| 148 | H6  | PX  | 0.00000  | 0.01253  | -0.01309 | 0.00000  | -0.00636 |
| 149 | H6  | PY  | 0.00000  | 0.01767  | -0.00534 | 0.00000  | 0.00360  |
| 150 | H6  | PZ  | -0.00108 | 0.00000  | 0.00000  | -0.00212 | 0.00000  |
| 151 | C8  | S   | 0.00000  | -0.02783 | -0.01809 | 0.00000  | -0.01677 |
| 152 | C8  | S   | 0.00000  | 0.04108  | 0.18952  | 0.00000  | -0.04256 |
| 153 | C8  | PX  | 0.00000  | 0.02424  | -0.05352 | 0.00000  | -0.21254 |
| 154 | C8  | PY  | 0.00000  | 0.02849  | 0.10280  | 0.00000  | -0.01250 |
| 155 | C8  | PZ  | -0.20251 | 0.00000  | 0.00000  | 0.32522  | 0.00000  |
| 156 | C8  | S   | 0.00000  | 0.68604  | -0.50138 | 0.00000  | 0.23690  |
| 157 | C8  | PX  | 0.00000  | 0.30456  | 0.12555  | 0.00000  | -0.09083 |
| 158 | C8  | PY  | 0.00000  | 1.41085  | -0.36785 | 0.00000  | 0.09925  |
| 159 | C8  | PZ  | 0.10206  | 0.00000  | 0.00000  | -0.22853 | 0.00000  |
| 160 | C8  | DXX | 0.00000  | -0.02451 | 0.00652  | 0.00000  | -0.01733 |
| 161 | C8  | DYY | 0.00000  | 0.01935  | -0.01194 | 0.00000  | -0.00877 |
| 162 | C8  | DZZ | 0.00000  | 0.01163  | 0.01788  | 0.00000  | 0.00752  |
| 163 | C8  | DXY | 0.00000  | -0.03008 | -0.00836 | 0.00000  | 0.01759  |
| 164 | C8  | DXZ | -0.00820 | 0.00000  | 0.00000  | 0.01648  | 0.00000  |
| 165 | C8  | DYZ | 0.01074  | 0.00000  | 0.00000  | -0.02827 | 0.00000  |
| 166 | H8  | S   | 0.00000  | 0.22018  | 0.05915  | 0.00000  | -0.08471 |
| 167 | H8  | S   | 0.00000  | -0.88019 | 0.11050  | 0.00000  | -0.30648 |
| 168 | H8  | PX  | 0.00000  | 0.01775  | 0.00969  | 0.00000  | -0.00155 |
| 169 | H8  | PY  | 0.00000  | -0.00400 | 0.00009  | 0.00000  | -0.00174 |
| 170 | H8  | PZ  | -0.00336 | 0.00000  | 0.00000  | 0.00920  | 0.00000  |
| 171 | C10 | S   | 0.00000  | 0.00318  | 0.00366  | 0.00000  | 0.00044  |
| 172 | C10 | S   | 0.00000  | 0.01084  | -0.02804 | 0.00000  | -0.06510 |
| 173 | C10 | PX  | 0.00000  | -0.06136 | -0.04517 | 0.00000  | -0.04914 |
| 174 | C10 | PY  | 0.00000  | 0.06382  | -0.09214 | 0.00000  | -0.05434 |
| 175 | C10 | PZ  | -0.28450 | 0.00000  | 0.00000  | 0.64844  | 0.00000  |
| 176 | C10 | S   | 0.00000  | 0.69607  | -0.13941 | 0.00000  | 0.08103  |
| 177 | C10 | PX  | 0.00000  | -0.20092 | 0.10698  | 0.00000  | 0.22343  |
| 178 | C10 | PY  | 0.00000  | 0.21825  | 0.13750  | 0.00000  | 0.20121  |
| 179 | C10 | PZ  | 0.26010  | 0.00000  | 0.00000  | -0.58269 | 0.00000  |
| 180 | C10 | DXX | 0.00000  | -0.00751 | -0.00641 | 0.00000  | -0.00382 |
| 181 | C10 | DYY | 0.00000  | 0.01633  | 0.00914  | 0.00000  | -0.00854 |
| 182 | C10 | DZZ | 0.00000  | 0.00244  | -0.00517 | 0.00000  | -0.00061 |
| 183 | C10 | DXY | 0.00000  | 0.02767  | 0.02619  | 0.00000  | -0.00579 |
| 184 | C10 | DXZ | 0.00630  | 0.00000  | 0.00000  | -0.01044 | 0.00000  |
| 185 | C10 | DYZ | -0.01699 | 0.00000  | 0.00000  | 0.02751  | 0.00000  |
| 186 | H16 | S   | 0.00000  | -0.07778 | -0.05736 | 0.00000  | -0.01368 |
| 187 | H16 | S   | 0.00000  | 0.19577  | 0.03101  | 0.00000  | -0.11026 |
| 188 | H16 | PX  | 0.00000  | 0.00461  | 0.00108  | 0.00000  | 0.00528  |
| 189 | H16 | PY  | 0.00000  | 0.00410  | 0.00813  | 0.00000  | 0.00409  |
| 190 | H16 | PZ  | -0.00341 | 0.00000  | 0.00000  | 0.00925  | 0.00000  |
| 191 | H18 | S   | 0.00000  | 0.08509  | 0.11536  | 0.00000  | 0.03244  |
| 192 | H18 | S   | 0.00000  | -0.12631 | 0.02167  | 0.00000  | 0.20076  |
| 193 | H18 | PX  | 0.00000  | -0.00009 | 0.00518  | 0.00000  | 0.00710  |
| 194 | H18 | PY  | 0.00000  | -0.01243 | -0.00665 | 0.00000  | -0.00141 |
| 195 | H18 | PZ  | -0.00512 | 0.00000  | 0.00000  | 0.01215  | 0.00000  |
| 196 | C9  | S   | 0.00000  | 0.01713  | 0.01140  | 0.00000  | 0.00643  |
| 197 | C9  | S   | 0.00000  | -0.21008 | -0.09373 | 0.00000  | 0.04466  |
| 198 | C9  | PX  | 0.00000  | 0.44790  | 0.16778  | 0.00000  | -0.19420 |
| 199 | C9  | PY  | 0.00000  | 0.13925  | 0.09299  | 0.00000  | 0.18039  |
| 200 | C9  | PZ  | 0.51230  | 0.00000  | 0.00000  | 0.16317  | 0.00000  |

|     |    |     |          |          |          |          |          |
|-----|----|-----|----------|----------|----------|----------|----------|
| 201 | C9 | S   | 0.00000  | 0.35114  | 0.11523  | 0.00000  | -0.13970 |
| 202 | C9 | PX  | 0.00000  | -0.69038 | -0.09987 | 0.00000  | 0.41417  |
| 203 | C9 | PY  | 0.00000  | -0.07685 | -0.00533 | 0.00000  | -0.39658 |
| 204 | C9 | PZ  | -1.21351 | 0.00000  | 0.00000  | -0.38146 | 0.00000  |
| 205 | C9 | DXX | 0.00000  | 0.02163  | 0.00539  | 0.00000  | -0.03861 |
| 206 | C9 | DYY | 0.00000  | -0.01038 | 0.02469  | 0.00000  | 0.10200  |
| 207 | C9 | DZZ | 0.00000  | -0.01177 | -0.02300 | 0.00000  | -0.04292 |
| 208 | C9 | DXY | 0.00000  | 0.04128  | 0.02606  | 0.00000  | -0.00153 |
| 209 | C9 | DXZ | 0.03546  | 0.00000  | 0.00000  | 0.01087  | 0.00000  |
| 210 | C9 | DYZ | -0.04599 | 0.00000  | 0.00000  | -0.01677 | 0.00000  |
| 211 | H3 | S   | 0.00000  | -0.01034 | 0.06264  | 0.00000  | 0.33631  |
| 212 | H3 | S   | 0.00000  | -0.10329 | -0.13773 | 0.00000  | -0.07031 |
| 213 | H3 | PX  | 0.00000  | 0.01506  | 0.00940  | 0.00000  | 0.00911  |
| 214 | H3 | PY  | 0.00000  | 0.00465  | 0.00455  | 0.00000  | 0.00486  |
| 215 | H3 | PZ  | -0.02192 | 0.00000  | 0.00000  | -0.00833 | 0.00000  |
| 216 | H5 | S   | -0.29670 | 0.05861  | -0.03654 | -0.09153 | -0.16146 |
| 217 | H5 | S   | -0.25033 | 0.04521  | -0.00697 | -0.06997 | 0.02982  |
| 218 | H5 | PX  | 0.00946  | 0.00260  | 0.00059  | 0.00418  | -0.00024 |
| 219 | H5 | PY  | 0.00277  | 0.01319  | -0.00128 | 0.00239  | -0.02371 |
| 220 | H5 | PZ  | -0.02735 | 0.00731  | 0.00747  | -0.00903 | 0.00242  |
| 221 | H7 | S   | 0.29670  | 0.05861  | -0.03654 | 0.09153  | -0.16146 |
| 222 | H7 | S   | 0.25033  | 0.04521  | -0.00697 | 0.06997  | 0.02982  |
| 223 | H7 | PX  | -0.00946 | 0.00260  | 0.00059  | -0.00418 | -0.00024 |
| 224 | H7 | PY  | -0.00277 | 0.01319  | -0.00128 | -0.00239 | -0.02371 |
| 225 | H7 | PZ  | -0.02735 | -0.00731 | -0.00747 | -0.00903 | -0.00242 |

|              |  |          |          |          |          |          |
|--------------|--|----------|----------|----------|----------|----------|
| MO:          |  | 76       | 77       | 78       | 79       | 80       |
| Eigenvalues: |  | 0.79398  | 0.81386  | 0.81512  | 0.81972  | 0.84843  |
| (ev):        |  | 21.60542 | 22.14624 | 22.18057 | 22.30575 | 23.08688 |

|    |    |     |          |          |          |          |          |
|----|----|-----|----------|----------|----------|----------|----------|
|    |    | A   | A        | A        | A        | A        |          |
| 1  | H1 | S   | 0.02840  | 0.00000  | -0.02220 | 0.13827  | 0.00000  |
| 2  | H1 | S   | 0.03542  | 0.00000  | -0.08125 | -0.11507 | 0.00000  |
| 3  | H1 | PX  | 0.00215  | 0.00000  | -0.00685 | 0.00359  | 0.00000  |
| 4  | H1 | PY  | 0.00859  | 0.00000  | 0.01078  | 0.00794  | 0.00000  |
| 5  | H1 | PZ  | 0.00000  | -0.00455 | 0.00000  | 0.00000  | -0.00116 |
| 6  | C1 | S   | -0.02650 | 0.00000  | 0.00384  | 0.03057  | 0.00000  |
| 7  | C1 | S   | 0.00182  | 0.00000  | -0.34518 | -0.17788 | 0.00000  |
| 8  | C1 | PX  | -0.08284 | 0.00000  | 0.05447  | 0.12238  | 0.00000  |
| 9  | C1 | PY  | 0.00609  | 0.00000  | 0.11568  | 0.11422  | 0.00000  |
| 10 | C1 | PZ  | 0.00000  | -0.59400 | 0.00000  | 0.00000  | -0.30439 |
| 11 | C1 | S   | 0.71472  | 0.00000  | 0.62580  | 0.25262  | 0.00000  |
| 12 | C1 | PX  | -0.39540 | 0.00000  | -0.21370 | -0.08153 | 0.00000  |
| 13 | C1 | PY  | 0.31985  | 0.00000  | 0.20750  | -0.10674 | 0.00000  |
| 14 | C1 | PZ  | 0.00000  | 0.60741  | 0.00000  | 0.00000  | 0.29751  |
| 15 | C1 | DXX | -0.00109 | 0.00000  | -0.02891 | 0.03974  | 0.00000  |
| 16 | C1 | DYY | -0.01808 | 0.00000  | -0.03533 | -0.01918 | 0.00000  |
| 17 | C1 | DZZ | 0.00980  | 0.00000  | -0.01037 | -0.02617 | 0.00000  |
| 18 | C1 | DXY | 0.04578  | 0.00000  | 0.00179  | -0.00900 | 0.00000  |
| 19 | C1 | DXZ | 0.00000  | 0.02903  | 0.00000  | 0.00000  | 0.02749  |
| 20 | C1 | DYZ | 0.00000  | 0.00749  | 0.00000  | 0.00000  | -0.01865 |
| 21 | C2 | S   | 0.00246  | 0.00000  | -0.02105 | -0.01981 | 0.00000  |
| 22 | C2 | S   | 0.42459  | 0.00000  | 0.29734  | 0.06648  | 0.00000  |
| 23 | C2 | PX  | 0.13939  | 0.00000  | -0.03542 | 0.03984  | 0.00000  |

|    |    |     |          |          |          |          |          |
|----|----|-----|----------|----------|----------|----------|----------|
| 24 | C2 | PY  | -0.05631 | 0.00000  | 0.30941  | -0.10373 | 0.00000  |
| 25 | C2 | PZ  | 0.00000  | 0.39949  | 0.00000  | 0.00000  | 0.34998  |
| 26 | C2 | S   | -0.73535 | 0.00000  | 0.55690  | 0.35392  | 0.00000  |
| 27 | C2 | PX  | 0.13231  | 0.00000  | 0.51129  | 0.51342  | 0.00000  |
| 28 | C2 | PY  | -0.38125 | 0.00000  | 0.53304  | 0.32520  | 0.00000  |
| 29 | C2 | PZ  | 0.00000  | -0.36451 | 0.00000  | 0.00000  | -0.34422 |
| 30 | C2 | DXX | 0.04130  | 0.00000  | 0.04651  | -0.02133 | 0.00000  |
| 31 | C2 | DYY | 0.05534  | 0.00000  | 0.00926  | 0.03181  | 0.00000  |
| 32 | C2 | DZZ | 0.00293  | 0.00000  | 0.00456  | 0.00804  | 0.00000  |
| 33 | C2 | DXY | -0.00193 | 0.00000  | -0.02521 | 0.00105  | 0.00000  |
| 34 | C2 | DXZ | 0.00000  | 0.02436  | 0.00000  | 0.00000  | 0.02197  |
| 35 | C2 | DYZ | 0.00000  | 0.02176  | 0.00000  | 0.00000  | -0.02819 |
| 36 | C3 | S   | 0.01658  | 0.00000  | -0.05583 | -0.06316 | 0.00000  |
| 37 | C3 | S   | 0.02811  | 0.00000  | -0.30291 | 0.37524  | 0.00000  |
| 38 | C3 | PX  | -0.27998 | 0.00000  | 0.13563  | 0.09471  | 0.00000  |
| 39 | C3 | PY  | 0.06304  | 0.00000  | 0.04101  | -0.16229 | 0.00000  |
| 40 | C3 | PZ  | 0.00000  | -0.28737 | 0.00000  | 0.00000  | 0.21913  |
| 41 | C3 | S   | -1.35894 | 0.00000  | 1.60593  | 0.69218  | 0.00000  |
| 42 | C3 | PX  | -0.19306 | 0.00000  | 0.11486  | -0.13526 | 0.00000  |
| 43 | C3 | PY  | 0.68377  | 0.00000  | -0.66720 | -0.32876 | 0.00000  |
| 44 | C3 | PZ  | 0.00000  | 0.15150  | 0.00000  | 0.00000  | -0.18422 |
| 45 | C3 | DXX | -0.02329 | 0.00000  | -0.06502 | 0.03381  | 0.00000  |
| 46 | C3 | DYY | 0.00913  | 0.00000  | -0.07191 | -0.01933 | 0.00000  |
| 47 | C3 | DZZ | 0.01050  | 0.00000  | 0.03372  | 0.02682  | 0.00000  |
| 48 | C3 | DXY | -0.03146 | 0.00000  | 0.01258  | 0.02477  | 0.00000  |
| 49 | C3 | DXZ | 0.00000  | -0.00260 | 0.00000  | 0.00000  | -0.00812 |
| 50 | C3 | DYZ | 0.00000  | -0.00154 | 0.00000  | 0.00000  | -0.01821 |
| 51 | C4 | S   | 0.00632  | 0.00000  | -0.01025 | -0.01935 | 0.00000  |
| 52 | C4 | S   | 0.03072  | 0.00000  | 0.12745  | -0.30071 | 0.00000  |
| 53 | C4 | PX  | -0.23354 | 0.00000  | -0.35787 | -0.00115 | 0.00000  |
| 54 | C4 | PY  | 0.05978  | 0.00000  | -0.24421 | -0.37485 | 0.00000  |
| 55 | C4 | PZ  | 0.00000  | -0.02103 | 0.00000  | 0.00000  | -0.42796 |
| 56 | C4 | S   | -0.16443 | 0.00000  | -0.52527 | 0.66870  | 0.00000  |
| 57 | C4 | PX  | -0.56683 | 0.00000  | 0.00133  | -0.22838 | 0.00000  |
| 58 | C4 | PY  | 0.56211  | 0.00000  | -0.19709 | 0.40413  | 0.00000  |
| 59 | C4 | PZ  | 0.00000  | 0.00723  | 0.00000  | 0.00000  | 0.44037  |
| 60 | C4 | DXX | 0.01552  | 0.00000  | -0.01237 | -0.09334 | 0.00000  |
| 61 | C4 | DYY | 0.01088  | 0.00000  | 0.01284  | 0.02129  | 0.00000  |
| 62 | C4 | DZZ | 0.00014  | 0.00000  | 0.01580  | 0.00653  | 0.00000  |
| 63 | C4 | DXY | -0.00045 | 0.00000  | 0.01163  | 0.01076  | 0.00000  |
| 64 | C4 | DXZ | 0.00000  | -0.03801 | 0.00000  | 0.00000  | -0.00303 |
| 65 | C4 | DYZ | 0.00000  | 0.02438  | 0.00000  | 0.00000  | 0.02415  |
| 66 | C5 | S   | 0.02072  | 0.00000  | 0.08017  | 0.01417  | 0.00000  |
| 67 | C5 | S   | 0.27094  | 0.00000  | 0.23584  | -0.22059 | 0.00000  |
| 68 | C5 | PX  | -0.03198 | 0.00000  | -0.17934 | -0.21673 | 0.00000  |
| 69 | C5 | PY  | -0.02721 | 0.00000  | 0.05375  | -0.06915 | 0.00000  |
| 70 | C5 | PZ  | 0.00000  | 0.26688  | 0.00000  | 0.00000  | -0.33736 |
| 71 | C5 | S   | -0.36082 | 0.00000  | -1.49611 | -0.31082 | 0.00000  |
| 72 | C5 | PX  | -0.32577 | 0.00000  | 0.13141  | -0.07889 | 0.00000  |
| 73 | C5 | PY  | -0.52719 | 0.00000  | 0.73648  | 0.34140  | 0.00000  |
| 74 | C5 | PZ  | 0.00000  | -0.27442 | 0.00000  | 0.00000  | 0.32998  |
| 75 | C5 | DXX | 0.04238  | 0.00000  | 0.09981  | -0.01100 | 0.00000  |
| 76 | C5 | DYY | 0.04448  | 0.00000  | 0.08961  | -0.04735 | 0.00000  |
| 77 | C5 | DZZ | -0.01265 | 0.00000  | -0.06081 | -0.00580 | 0.00000  |

|     |    |     |          |          |          |          |          |
|-----|----|-----|----------|----------|----------|----------|----------|
| 78  | C5 | DXY | 0.00318  | 0.00000  | 0.00220  | -0.02829 | 0.00000  |
| 79  | C5 | DXZ | 0.00000  | 0.01324  | 0.00000  | 0.00000  | -0.02112 |
| 80  | C5 | DYZ | 0.00000  | -0.03595 | 0.00000  | 0.00000  | -0.01259 |
| 81  | C6 | S   | 0.02314  | 0.00000  | -0.00331 | 0.02492  | 0.00000  |
| 82  | C6 | S   | 0.24805  | 0.00000  | -0.27694 | 0.23650  | 0.00000  |
| 83  | C6 | PX  | -0.13659 | 0.00000  | -0.14130 | -0.05060 | 0.00000  |
| 84  | C6 | PY  | -0.17443 | 0.00000  | 0.06973  | -0.27843 | 0.00000  |
| 85  | C6 | PZ  | 0.00000  | 0.07776  | 0.00000  | 0.00000  | 0.48543  |
| 86  | C6 | S   | -0.09771 | 0.00000  | 0.18065  | -0.68935 | 0.00000  |
| 87  | C6 | PX  | 0.41986  | 0.00000  | -0.19137 | -0.16602 | 0.00000  |
| 88  | C6 | PY  | -0.21704 | 0.00000  | -0.36112 | -0.13320 | 0.00000  |
| 89  | C6 | PZ  | 0.00000  | -0.07347 | 0.00000  | 0.00000  | -0.47453 |
| 90  | C6 | DXX | 0.05608  | 0.00000  | -0.06802 | 0.05182  | 0.00000  |
| 91  | C6 | DYY | 0.03906  | 0.00000  | -0.02251 | 0.01894  | 0.00000  |
| 92  | C6 | DZZ | -0.01501 | 0.00000  | 0.00820  | -0.01274 | 0.00000  |
| 93  | C6 | DXY | -0.00642 | 0.00000  | -0.00707 | 0.00341  | 0.00000  |
| 94  | C6 | DXZ | 0.00000  | -0.01643 | 0.00000  | 0.00000  | -0.00734 |
| 95  | C6 | DYZ | 0.00000  | -0.00284 | 0.00000  | 0.00000  | 0.01865  |
| 96  | C7 | S   | -0.03668 | 0.00000  | 0.02300  | 0.08130  | 0.00000  |
| 97  | C7 | S   | -0.29411 | 0.00000  | -0.05353 | 0.19937  | 0.00000  |
| 98  | C7 | PX  | 0.04490  | 0.00000  | 0.02113  | 0.10928  | 0.00000  |
| 99  | C7 | PY  | 0.21340  | 0.00000  | -0.27114 | -0.10568 | 0.00000  |
| 100 | C7 | PZ  | 0.00000  | -0.40536 | 0.00000  | 0.00000  | 0.21539  |
| 101 | C7 | S   | 1.40513  | 0.00000  | -1.10053 | -1.31108 | 0.00000  |
| 102 | C7 | PX  | -0.69500 | 0.00000  | 0.64875  | 0.46094  | 0.00000  |
| 103 | C7 | PY  | 0.71217  | 0.00000  | -0.23841 | 0.00825  | 0.00000  |
| 104 | C7 | PZ  | 0.00000  | 0.48071  | 0.00000  | 0.00000  | -0.14824 |
| 105 | C7 | DXX | -0.08594 | 0.00000  | 0.00757  | 0.07973  | 0.00000  |
| 106 | C7 | DYY | -0.03001 | 0.00000  | -0.01342 | 0.10492  | 0.00000  |
| 107 | C7 | DZZ | 0.01954  | 0.00000  | 0.00338  | -0.05519 | 0.00000  |
| 108 | C7 | DXY | 0.01884  | 0.00000  | -0.01828 | 0.00312  | 0.00000  |
| 109 | C7 | DXZ | 0.00000  | 0.02906  | 0.00000  | 0.00000  | -0.00720 |
| 110 | C7 | DYZ | 0.00000  | -0.00059 | 0.00000  | 0.00000  | 0.00013  |
| 111 | O1 | S   | 0.00032  | 0.00000  | -0.02172 | -0.00459 | 0.00000  |
| 112 | O1 | S   | 0.08432  | 0.00000  | 0.13436  | 0.02993  | 0.00000  |
| 113 | O1 | PX  | 0.16872  | 0.00000  | 0.18121  | 0.04093  | 0.00000  |
| 114 | O1 | PY  | 0.04880  | 0.00000  | 0.02651  | -0.11391 | 0.00000  |
| 115 | O1 | PZ  | 0.00000  | -0.01266 | 0.00000  | 0.00000  | -0.08163 |
| 116 | O1 | S   | -0.53726 | 0.00000  | -0.14228 | -0.27372 | 0.00000  |
| 117 | O1 | PX  | 0.02396  | 0.00000  | -0.10484 | 0.06555  | 0.00000  |
| 118 | O1 | PY  | 0.08550  | 0.00000  | -0.22172 | 0.05775  | 0.00000  |
| 119 | O1 | PZ  | 0.00000  | 0.03108  | 0.00000  | 0.00000  | 0.03991  |
| 120 | O1 | DXX | -0.03552 | 0.00000  | -0.02867 | 0.02386  | 0.00000  |
| 121 | O1 | DYY | 0.01809  | 0.00000  | 0.00275  | -0.08048 | 0.00000  |
| 122 | O1 | DZZ | 0.04770  | 0.00000  | 0.05414  | 0.04070  | 0.00000  |
| 123 | O1 | DXY | -0.03289 | 0.00000  | -0.03882 | -0.00906 | 0.00000  |
| 124 | O1 | DXZ | 0.00000  | 0.01784  | 0.00000  | 0.00000  | 0.00520  |
| 125 | O1 | DYZ | 0.00000  | -0.00539 | 0.00000  | 0.00000  | 0.01154  |
| 126 | H4 | S   | 0.08880  | 0.00000  | 0.28539  | 0.01787  | 0.00000  |
| 127 | H4 | S   | 0.12619  | 0.00000  | -0.15453 | -0.28611 | 0.00000  |
| 128 | H4 | PX  | -0.00310 | 0.00000  | -0.00473 | 0.00609  | 0.00000  |
| 129 | H4 | PY  | 0.00465  | 0.00000  | 0.01932  | 0.00220  | 0.00000  |
| 130 | H4 | PZ  | 0.00000  | -0.00595 | 0.00000  | 0.00000  | -0.00393 |
| 131 | N1 | S   | 0.00403  | 0.00000  | -0.00089 | 0.01267  | 0.00000  |

|     |     |     |          |          |          |          |          |
|-----|-----|-----|----------|----------|----------|----------|----------|
| 132 | N1  | S   | 0.00089  | 0.00000  | 0.03261  | -0.04696 | 0.00000  |
| 133 | N1  | PX  | 0.04230  | 0.00000  | 0.02997  | -0.04100 | 0.00000  |
| 134 | N1  | PY  | 0.06357  | 0.00000  | -0.03564 | 0.12805  | 0.00000  |
| 135 | N1  | PZ  | 0.00000  | 0.13439  | 0.00000  | 0.00000  | 0.13369  |
| 136 | N1  | S   | -0.04827 | 0.00000  | -0.42442 | 0.05288  | 0.00000  |
| 137 | N1  | PX  | 0.08685  | 0.00000  | -0.11865 | 0.13840  | 0.00000  |
| 138 | N1  | PY  | -0.29893 | 0.00000  | -0.12868 | -0.30033 | 0.00000  |
| 139 | N1  | PZ  | 0.00000  | -0.05387 | 0.00000  | 0.00000  | 0.00262  |
| 140 | N1  | DXX | -0.04190 | 0.00000  | 0.00918  | -0.03036 | 0.00000  |
| 141 | N1  | DYY | 0.02296  | 0.00000  | -0.02264 | 0.03528  | 0.00000  |
| 142 | N1  | DZZ | 0.00879  | 0.00000  | 0.01982  | -0.03166 | 0.00000  |
| 143 | N1  | DXY | 0.01165  | 0.00000  | 0.00641  | 0.00030  | 0.00000  |
| 144 | N1  | DXZ | 0.00000  | 0.01634  | 0.00000  | 0.00000  | 0.01984  |
| 145 | N1  | DYZ | 0.00000  | 0.01159  | 0.00000  | 0.00000  | 0.01629  |
| 146 | H6  | S   | 0.06823  | 0.00000  | 0.05642  | -0.00999 | 0.00000  |
| 147 | H6  | S   | 0.21149  | 0.00000  | 0.35246  | 0.39355  | 0.00000  |
| 148 | H6  | PX  | -0.00771 | 0.00000  | -0.00156 | 0.00657  | 0.00000  |
| 149 | H6  | PY  | -0.00392 | 0.00000  | 0.00327  | 0.00160  | 0.00000  |
| 150 | H6  | PZ  | 0.00000  | 0.00017  | 0.00000  | 0.00000  | 0.00312  |
| 151 | C8  | S   | -0.02972 | 0.00000  | 0.03303  | -0.04821 | 0.00000  |
| 152 | C8  | S   | -0.53701 | 0.00000  | 0.17198  | 0.26498  | 0.00000  |
| 153 | C8  | PX  | 0.16477  | 0.00000  | -0.02077 | 0.32616  | 0.00000  |
| 154 | C8  | PY  | 0.00445  | 0.00000  | -0.06717 | 0.17482  | 0.00000  |
| 155 | C8  | PZ  | 0.00000  | 0.16225  | 0.00000  | 0.00000  | 0.19660  |
| 156 | C8  | S   | 0.94269  | 0.00000  | -0.25310 | 0.15199  | 0.00000  |
| 157 | C8  | PX  | 0.34532  | 0.00000  | -0.08399 | 0.17230  | 0.00000  |
| 158 | C8  | PY  | -0.74691 | 0.00000  | 0.69385  | 0.04875  | 0.00000  |
| 159 | C8  | PZ  | 0.00000  | -0.22681 | 0.00000  | 0.00000  | -0.24304 |
| 160 | C8  | DXX | -0.04784 | 0.00000  | 0.02403  | 0.03091  | 0.00000  |
| 161 | C8  | DYY | -0.10876 | 0.00000  | 0.06038  | -0.02279 | 0.00000  |
| 162 | C8  | DZZ | 0.01333  | 0.00000  | -0.01894 | 0.02440  | 0.00000  |
| 163 | C8  | DXY | -0.00756 | 0.00000  | -0.00644 | 0.02540  | 0.00000  |
| 164 | C8  | DXZ | 0.00000  | -0.01152 | 0.00000  | 0.00000  | -0.00740 |
| 165 | C8  | DYZ | 0.00000  | -0.04423 | 0.00000  | 0.00000  | 0.03261  |
| 166 | H8  | S   | -0.21038 | 0.00000  | 0.09179  | 0.26167  | 0.00000  |
| 167 | H8  | S   | 0.33755  | 0.00000  | -0.26704 | -0.14738 | 0.00000  |
| 168 | H8  | PX  | -0.01975 | 0.00000  | 0.00440  | 0.02166  | 0.00000  |
| 169 | H8  | PY  | 0.02075  | 0.00000  | -0.00997 | -0.00232 | 0.00000  |
| 170 | H8  | PZ  | 0.00000  | 0.00015  | 0.00000  | 0.00000  | 0.00374  |
| 171 | C10 | S   | -0.00619 | 0.00000  | 0.00100  | 0.02000  | 0.00000  |
| 172 | C10 | S   | -0.42047 | 0.00000  | 0.31220  | -0.09482 | 0.00000  |
| 173 | C10 | PX  | 0.07998  | 0.00000  | -0.04695 | 0.24388  | 0.00000  |
| 174 | C10 | PY  | -0.22428 | 0.00000  | 0.20974  | -0.21459 | 0.00000  |
| 175 | C10 | PZ  | 0.00000  | 0.47762  | 0.00000  | 0.00000  | -0.48884 |
| 176 | C10 | S   | -0.07050 | 0.00000  | 0.05089  | -0.04912 | 0.00000  |
| 177 | C10 | PX  | -0.16073 | 0.00000  | -0.02351 | -0.75725 | 0.00000  |
| 178 | C10 | PY  | -0.33241 | 0.00000  | 0.09056  | 0.10536  | 0.00000  |
| 179 | C10 | PZ  | 0.00000  | -0.44474 | 0.00000  | 0.00000  | 0.55813  |
| 180 | C10 | DXX | -0.08093 | 0.00000  | 0.05101  | 0.01308  | 0.00000  |
| 181 | C10 | DYY | -0.03804 | 0.00000  | 0.02949  | 0.00741  | 0.00000  |
| 182 | C10 | DZZ | 0.00863  | 0.00000  | -0.00089 | -0.02073 | 0.00000  |
| 183 | C10 | DXY | 0.00554  | 0.00000  | 0.00192  | -0.02203 | 0.00000  |
| 184 | C10 | DXZ | 0.00000  | 0.00189  | 0.00000  | 0.00000  | -0.00215 |
| 185 | C10 | DYZ | 0.00000  | 0.02291  | 0.00000  | 0.00000  | 0.00048  |

|     |     |     |          |          |          |          |          |
|-----|-----|-----|----------|----------|----------|----------|----------|
| 186 | H16 | S   | -0.14138 | 0.00000  | 0.07748  | 0.21110  | 0.00000  |
| 187 | H16 | S   | 0.04524  | 0.00000  | 0.05448  | 0.30130  | 0.00000  |
| 188 | H16 | PX  | -0.02136 | 0.00000  | 0.01201  | -0.01609 | 0.00000  |
| 189 | H16 | PY  | 0.00307  | 0.00000  | -0.00183 | -0.01452 | 0.00000  |
| 190 | H16 | PZ  | 0.00000  | 0.00802  | 0.00000  | 0.00000  | -0.00808 |
| 191 | H18 | S   | -0.13001 | 0.00000  | 0.06995  | -0.07815 | 0.00000  |
| 192 | H18 | S   | -0.29837 | 0.00000  | 0.07772  | -0.27716 | 0.00000  |
| 193 | H18 | PX  | 0.00794  | 0.00000  | -0.00868 | -0.01278 | 0.00000  |
| 194 | H18 | PY  | 0.01142  | 0.00000  | -0.00638 | 0.00370  | 0.00000  |
| 195 | H18 | PZ  | 0.00000  | 0.00459  | 0.00000  | 0.00000  | -0.00745 |
| 196 | C9  | S   | 0.01318  | 0.00000  | 0.02188  | -0.00078 | 0.00000  |
| 197 | C9  | S   | -0.16643 | 0.00000  | -0.17775 | 0.00659  | 0.00000  |
| 198 | C9  | PX  | 0.37650  | 0.00000  | 0.37873  | 0.02036  | 0.00000  |
| 199 | C9  | PY  | 0.08221  | 0.00000  | 0.18471  | -0.03736 | 0.00000  |
| 200 | C9  | PZ  | 0.00000  | 0.16172  | 0.00000  | 0.00000  | 0.19759  |
| 201 | C9  | S   | 0.20466  | 0.00000  | 0.21412  | -0.04040 | 0.00000  |
| 202 | C9  | PX  | -0.44843 | 0.00000  | -0.53530 | -0.00958 | 0.00000  |
| 203 | C9  | PY  | 0.02303  | 0.00000  | -0.18449 | 0.13576  | 0.00000  |
| 204 | C9  | PZ  | 0.00000  | -0.23287 | 0.00000  | 0.00000  | -0.35931 |
| 205 | C9  | DXX | 0.03182  | 0.00000  | 0.03011  | -0.01955 | 0.00000  |
| 206 | C9  | DYY | -0.02583 | 0.00000  | 0.00970  | 0.02208  | 0.00000  |
| 207 | C9  | DZZ | -0.01142 | 0.00000  | -0.02658 | -0.00268 | 0.00000  |
| 208 | C9  | DXY | 0.03203  | 0.00000  | 0.04092  | 0.02738  | 0.00000  |
| 209 | C9  | DXZ | 0.00000  | -0.00913 | 0.00000  | 0.00000  | 0.00036  |
| 210 | C9  | DYZ | 0.00000  | -0.01194 | 0.00000  | 0.00000  | -0.02089 |
| 211 | H3  | S   | -0.07516 | 0.00000  | 0.06196  | 0.03393  | 0.00000  |
| 212 | H3  | S   | -0.03451 | 0.00000  | -0.05247 | -0.12164 | 0.00000  |
| 213 | H3  | PX  | 0.01072  | 0.00000  | 0.01877  | 0.00924  | 0.00000  |
| 214 | H3  | PY  | 0.00188  | 0.00000  | 0.00526  | 0.00823  | 0.00000  |
| 215 | H3  | PZ  | 0.00000  | -0.00242 | 0.00000  | 0.00000  | -0.00863 |
| 216 | H5  | S   | 0.04797  | -0.01364 | 0.01401  | -0.03885 | -0.04682 |
| 217 | H5  | S   | 0.00210  | -0.01284 | 0.07023  | 0.06829  | -0.03726 |
| 218 | H5  | PX  | 0.00286  | 0.01153  | 0.00400  | -0.00730 | 0.01377  |
| 219 | H5  | PY  | 0.01145  | 0.00574  | 0.00542  | 0.00322  | 0.00876  |
| 220 | H5  | PZ  | 0.00877  | -0.01142 | 0.00855  | 0.00201  | -0.01339 |
| 221 | H7  | S   | 0.04797  | 0.01364  | 0.01401  | -0.03885 | 0.04682  |
| 222 | H7  | S   | 0.00210  | 0.01284  | 0.07023  | 0.06829  | 0.03726  |
| 223 | H7  | PX  | 0.00286  | -0.01153 | 0.00400  | -0.00730 | -0.01377 |
| 224 | H7  | PY  | 0.01145  | -0.00574 | 0.00542  | 0.00322  | -0.00876 |
| 225 | H7  | PZ  | -0.00877 | -0.01142 | -0.00855 | -0.00201 | -0.01339 |

|              |          |          |          |          |          |
|--------------|----------|----------|----------|----------|----------|
| MO:          | 81       | 82       | 83       | 84       | 85       |
| Eigenvalues: | 0.85238  | 0.87614  | 0.87640  | 0.89436  | 0.91131  |
| (ev):        | 23.19457 | 23.84103 | 23.84796 | 24.33683 | 24.79810 |

|   |    |    |          |         |          |          |         |
|---|----|----|----------|---------|----------|----------|---------|
|   |    | A  | A        | A       | A        | A        |         |
| 1 | H1 | S  | 0.09784  | 0.00000 | -0.23481 | 0.00000  | 0.18368 |
| 2 | H1 | S  | 0.08025  | 0.00000 | 0.11908  | 0.00000  | 0.10641 |
| 3 | H1 | PX | 0.00870  | 0.00000 | -0.01304 | 0.00000  | 0.00979 |
| 4 | H1 | PY | 0.01464  | 0.00000 | -0.00181 | 0.00000  | 0.00124 |
| 5 | H1 | PZ | 0.00000  | 0.00007 | 0.00000  | -0.00276 | 0.00000 |
| 6 | C1 | S  | 0.01561  | 0.00000 | -0.06156 | 0.00000  | 0.02476 |
| 7 | C1 | S  | 0.22409  | 0.00000 | -0.06639 | 0.00000  | 0.16070 |
| 8 | C1 | PX | -0.13001 | 0.00000 | -0.14963 | 0.00000  | 0.07363 |

|    |    |     |          |          |          |          |          |
|----|----|-----|----------|----------|----------|----------|----------|
| 9  | C1 | PY  | 0.23045  | 0.00000  | -0.00669 | 0.00000  | -0.09446 |
| 10 | C1 | PZ  | 0.00000  | -0.10311 | 0.00000  | 0.47764  | 0.00000  |
| 11 | C1 | S   | 0.43231  | 0.00000  | 0.66852  | 0.00000  | -0.21869 |
| 12 | C1 | PX  | -0.61504 | 0.00000  | -0.16032 | 0.00000  | -0.40983 |
| 13 | C1 | PY  | 0.98470  | 0.00000  | 0.12024  | 0.00000  | 0.51449  |
| 14 | C1 | PZ  | 0.00000  | -0.02551 | 0.00000  | -0.69219 | 0.00000  |
| 15 | C1 | DXX | 0.06674  | 0.00000  | -0.08132 | 0.00000  | 0.06294  |
| 16 | C1 | DYY | 0.03590  | 0.00000  | -0.05118 | 0.00000  | 0.03670  |
| 17 | C1 | DZZ | -0.02139 | 0.00000  | 0.04968  | 0.00000  | -0.01946 |
| 18 | C1 | DXY | 0.00259  | 0.00000  | 0.01293  | 0.00000  | -0.00017 |
| 19 | C1 | DXZ | 0.00000  | 0.01191  | 0.00000  | -0.01370 | 0.00000  |
| 20 | C1 | DYZ | 0.00000  | 0.00720  | 0.00000  | -0.00937 | 0.00000  |
| 21 | C2 | S   | -0.03424 | 0.00000  | -0.04866 | 0.00000  | 0.02237  |
| 22 | C2 | S   | -0.11525 | 0.00000  | -0.18517 | 0.00000  | 0.21413  |
| 23 | C2 | PX  | 0.06323  | 0.00000  | 0.01389  | 0.00000  | 0.08727  |
| 24 | C2 | PY  | 0.05394  | 0.00000  | 0.20276  | 0.00000  | -0.25221 |
| 25 | C2 | PZ  | 0.00000  | 0.23750  | 0.00000  | 0.60821  | 0.00000  |
| 26 | C2 | S   | -0.36495 | 0.00000  | 0.74084  | 0.00000  | -0.88094 |
| 27 | C2 | PX  | 0.10714  | 0.00000  | 0.30583  | 0.00000  | -0.17778 |
| 28 | C2 | PY  | -1.74042 | 0.00000  | -0.25637 | 0.00000  | 0.03092  |
| 29 | C2 | PZ  | 0.00000  | -0.33700 | 0.00000  | -0.89955 | 0.00000  |
| 30 | C2 | DXX | -0.06255 | 0.00000  | -0.05028 | 0.00000  | 0.03773  |
| 31 | C2 | DYY | -0.04614 | 0.00000  | -0.08882 | 0.00000  | 0.05088  |
| 32 | C2 | DZZ | 0.02972  | 0.00000  | 0.03540  | 0.00000  | -0.00785 |
| 33 | C2 | DXY | -0.02834 | 0.00000  | 0.01260  | 0.00000  | 0.01848  |
| 34 | C2 | DXZ | 0.00000  | 0.03018  | 0.00000  | 0.00901  | 0.00000  |
| 35 | C2 | DYZ | 0.00000  | 0.03606  | 0.00000  | -0.01199 | 0.00000  |
| 36 | C3 | S   | 0.01964  | 0.00000  | 0.03054  | 0.00000  | 0.00526  |
| 37 | C3 | S   | 0.10749  | 0.00000  | 0.00850  | 0.00000  | -0.13551 |
| 38 | C3 | PX  | 0.05601  | 0.00000  | -0.05994 | 0.00000  | 0.00775  |
| 39 | C3 | PY  | 0.24774  | 0.00000  | -0.27177 | 0.00000  | 0.20699  |
| 40 | C3 | PZ  | 0.00000  | -0.10660 | 0.00000  | -0.11645 | 0.00000  |
| 41 | C3 | S   | -1.34345 | 0.00000  | -0.09195 | 0.00000  | -0.41714 |
| 42 | C3 | PX  | 0.80748  | 0.00000  | 0.31858  | 0.00000  | 0.26676  |
| 43 | C3 | PY  | 1.42970  | 0.00000  | -0.11758 | 0.00000  | 0.55602  |
| 44 | C3 | PZ  | 0.00000  | 0.09814  | 0.00000  | 0.21658  | 0.00000  |
| 45 | C3 | DXX | 0.07716  | 0.00000  | 0.03420  | 0.00000  | -0.03557 |
| 46 | C3 | DYY | -0.02359 | 0.00000  | 0.01215  | 0.00000  | -0.01130 |
| 47 | C3 | DZZ | -0.01561 | 0.00000  | -0.02342 | 0.00000  | 0.01180  |
| 48 | C3 | DXY | 0.00103  | 0.00000  | 0.00237  | 0.00000  | 0.00498  |
| 49 | C3 | DXZ | 0.00000  | 0.01682  | 0.00000  | -0.01210 | 0.00000  |
| 50 | C3 | DYZ | 0.00000  | -0.04407 | 0.00000  | 0.02090  | 0.00000  |
| 51 | C4 | S   | 0.02413  | 0.00000  | 0.02051  | 0.00000  | -0.01158 |
| 52 | C4 | S   | -0.15859 | 0.00000  | 0.07739  | 0.00000  | -0.01085 |
| 53 | C4 | PX  | -0.05495 | 0.00000  | -0.20238 | 0.00000  | 0.12753  |
| 54 | C4 | PY  | -0.44171 | 0.00000  | 0.36953  | 0.00000  | -0.09656 |
| 55 | C4 | PZ  | 0.00000  | -0.39994 | 0.00000  | -0.26554 | 0.00000  |
| 56 | C4 | S   | 0.01235  | 0.00000  | -0.34414 | 0.00000  | -0.08849 |
| 57 | C4 | PX  | -1.69996 | 0.00000  | -0.25646 | 0.00000  | -0.55625 |
| 58 | C4 | PY  | 1.57922  | 0.00000  | -0.55078 | 0.00000  | 0.57315  |
| 59 | C4 | PZ  | 0.00000  | 0.67617  | 0.00000  | 0.34279  | 0.00000  |
| 60 | C4 | DXX | -0.00865 | 0.00000  | 0.06538  | 0.00000  | -0.04269 |
| 61 | C4 | DYY | 0.04377  | 0.00000  | -0.02465 | 0.00000  | 0.02143  |
| 62 | C4 | DZZ | -0.02732 | 0.00000  | -0.00763 | 0.00000  | 0.01071  |



|     |    |     |          |          |          |          |          |
|-----|----|-----|----------|----------|----------|----------|----------|
| 63  | C4 | DXY | -0.01661 | 0.00000  | -0.03058 | 0.00000  | 0.02222  |
| 64  | C4 | DXZ | 0.00000  | -0.01784 | 0.00000  | 0.03734  | 0.00000  |
| 65  | C4 | DYZ | 0.00000  | -0.01236 | 0.00000  | -0.01208 | 0.00000  |
| 66  | C5 | S   | 0.00043  | 0.00000  | 0.03335  | 0.00000  | -0.01857 |
| 67  | C5 | S   | -0.22116 | 0.00000  | -0.00719 | 0.00000  | 0.01489  |
| 68  | C5 | PX  | -0.03823 | 0.00000  | 0.17434  | 0.00000  | -0.09375 |
| 69  | C5 | PY  | 0.07424  | 0.00000  | 0.18762  | 0.00000  | -0.11255 |
| 70  | C5 | PZ  | 0.00000  | 0.46553  | 0.00000  | -0.50393 | 0.00000  |
| 71  | C5 | S   | 0.80954  | 0.00000  | -0.50311 | 0.00000  | 0.17208  |
| 72  | C5 | PX  | -0.95662 | 0.00000  | -0.52267 | 0.00000  | -0.01635 |
| 73  | C5 | PY  | -1.53713 | 0.00000  | 0.10884  | 0.00000  | -0.42465 |
| 74  | C5 | PZ  | 0.00000  | -0.65053 | 0.00000  | 0.70076  | 0.00000  |
| 75  | C5 | DXX | -0.03980 | 0.00000  | -0.01059 | 0.00000  | -0.00305 |
| 76  | C5 | DYY | -0.01855 | 0.00000  | 0.06933  | 0.00000  | -0.03776 |
| 77  | C5 | DZZ | 0.00464  | 0.00000  | -0.01489 | 0.00000  | 0.01454  |
| 78  | C5 | DXY | 0.05185  | 0.00000  | 0.02387  | 0.00000  | -0.03634 |
| 79  | C5 | DXZ | 0.00000  | 0.01951  | 0.00000  | -0.02823 | 0.00000  |
| 80  | C5 | DYZ | 0.00000  | -0.04022 | 0.00000  | -0.02646 | 0.00000  |
| 81  | C6 | S   | 0.01053  | 0.00000  | -0.00790 | 0.00000  | -0.00063 |
| 82  | C6 | S   | 0.13540  | 0.00000  | 0.06339  | 0.00000  | -0.00196 |
| 83  | C6 | PX  | 0.43682  | 0.00000  | 0.30853  | 0.00000  | -0.05325 |
| 84  | C6 | PY  | 0.15271  | 0.00000  | -0.20912 | 0.00000  | -0.04044 |
| 85  | C6 | PZ  | 0.00000  | -0.48219 | 0.00000  | -0.09535 | 0.00000  |
| 86  | C6 | S   | -0.70020 | 0.00000  | -0.25069 | 0.00000  | 0.56499  |
| 87  | C6 | PX  | 1.23486  | 0.00000  | -0.09528 | 0.00000  | 0.25634  |
| 88  | C6 | PY  | 0.34160  | 0.00000  | 0.16275  | 0.00000  | 0.07300  |
| 89  | C6 | PZ  | 0.00000  | 0.71731  | 0.00000  | 0.25094  | 0.00000  |
| 90  | C6 | DXX | -0.00502 | 0.00000  | 0.00448  | 0.00000  | 0.00576  |
| 91  | C6 | DYY | 0.03737  | 0.00000  | -0.01294 | 0.00000  | -0.01980 |
| 92  | C6 | DZZ | -0.00286 | 0.00000  | 0.00556  | 0.00000  | 0.00661  |
| 93  | C6 | DXY | 0.00041  | 0.00000  | 0.03309  | 0.00000  | -0.02660 |
| 94  | C6 | DXZ | 0.00000  | -0.01070 | 0.00000  | -0.00117 | 0.00000  |
| 95  | C6 | DYZ | 0.00000  | 0.02370  | 0.00000  | 0.00975  | 0.00000  |
| 96  | C7 | S   | -0.06178 | 0.00000  | 0.00764  | 0.00000  | -0.03640 |
| 97  | C7 | S   | -0.02343 | 0.00000  | 0.18641  | 0.00000  | -0.36076 |
| 98  | C7 | PX  | -0.04706 | 0.00000  | -0.04896 | 0.00000  | 0.19145  |
| 99  | C7 | PY  | -0.13242 | 0.00000  | 0.02304  | 0.00000  | 0.13235  |
| 100 | C7 | PZ  | 0.00000  | 0.60355  | 0.00000  | -0.15546 | 0.00000  |
| 101 | C7 | S   | 1.82572  | 0.00000  | -0.48436 | 0.00000  | 1.04408  |
| 102 | C7 | PX  | -1.49090 | 0.00000  | 0.08057  | 0.00000  | -0.95128 |
| 103 | C7 | PY  | -0.03240 | 0.00000  | -0.08161 | 0.00000  | -0.04938 |
| 104 | C7 | PZ  | 0.00000  | -0.85059 | 0.00000  | -0.00833 | 0.00000  |
| 105 | C7 | DXX | -0.08790 | 0.00000  | -0.00842 | 0.00000  | -0.09595 |
| 106 | C7 | DYY | 0.01833  | 0.00000  | 0.05876  | 0.00000  | -0.05765 |
| 107 | C7 | DZZ | 0.03232  | 0.00000  | -0.00773 | 0.00000  | 0.03787  |
| 108 | C7 | DXY | 0.01353  | 0.00000  | 0.00184  | 0.00000  | 0.00132  |
| 109 | C7 | DXZ | 0.00000  | -0.03506 | 0.00000  | 0.00570  | 0.00000  |
| 110 | C7 | DYZ | 0.00000  | -0.00181 | 0.00000  | -0.00027 | 0.00000  |
| 111 | O1 | S   | -0.00717 | 0.00000  | -0.00169 | 0.00000  | 0.00676  |
| 112 | O1 | S   | 0.09103  | 0.00000  | 0.08217  | 0.00000  | -0.05542 |
| 113 | O1 | PX  | 0.16988  | 0.00000  | 0.06838  | 0.00000  | -0.02046 |
| 114 | O1 | PY  | -0.12904 | 0.00000  | 0.10628  | 0.00000  | -0.04851 |
| 115 | O1 | PZ  | 0.00000  | 0.01604  | 0.00000  | -0.05199 | 0.00000  |
| 116 | O1 | S   | -0.78626 | 0.00000  | 0.05441  | 0.00000  | -0.14466 |

|     |    |     |          |          |          |          |          |
|-----|----|-----|----------|----------|----------|----------|----------|
| 117 | O1 | PX  | 0.15651  | 0.00000  | -0.04200 | 0.00000  | 0.11565  |
| 118 | O1 | PY  | 0.11852  | 0.00000  | -0.09659 | 0.00000  | 0.14831  |
| 119 | O1 | PZ  | 0.00000  | -0.06869 | 0.00000  | -0.00518 | 0.00000  |
| 120 | O1 | DXX | 0.01259  | 0.00000  | -0.01748 | 0.00000  | -0.00636 |
| 121 | O1 | DYY | -0.09578 | 0.00000  | 0.10010  | 0.00000  | -0.04003 |
| 122 | O1 | DZZ | 0.06589  | 0.00000  | 0.00535  | 0.00000  | -0.00060 |
| 123 | O1 | DXY | -0.02507 | 0.00000  | 0.00564  | 0.00000  | -0.00553 |
| 124 | O1 | DXZ | 0.00000  | 0.01944  | 0.00000  | -0.03078 | 0.00000  |
| 125 | O1 | DYZ | 0.00000  | 0.02337  | 0.00000  | 0.00992  | 0.00000  |
| 126 | H4 | S   | -0.21659 | 0.00000  | 0.07321  | 0.00000  | -0.00380 |
| 127 | H4 | S   | 0.17630  | 0.00000  | -0.13389 | 0.00000  | 0.04255  |
| 128 | H4 | PX  | 0.02334  | 0.00000  | -0.00536 | 0.00000  | -0.00168 |
| 129 | H4 | PY  | -0.00680 | 0.00000  | 0.00999  | 0.00000  | -0.00630 |
| 130 | H4 | PZ  | 0.00000  | -0.00780 | 0.00000  | -0.00252 | 0.00000  |
| 131 | N1 | S   | -0.01260 | 0.00000  | 0.01581  | 0.00000  | 0.00699  |
| 132 | N1 | S   | 0.02038  | 0.00000  | -0.06815 | 0.00000  | 0.00989  |
| 133 | N1 | PX  | 0.11042  | 0.00000  | -0.05303 | 0.00000  | -0.17831 |
| 134 | N1 | PY  | 0.10199  | 0.00000  | 0.04603  | 0.00000  | -0.06151 |
| 135 | N1 | PZ  | 0.00000  | -0.15115 | 0.00000  | 0.06565  | 0.00000  |
| 136 | N1 | S   | 0.55006  | 0.00000  | 0.40273  | 0.00000  | -0.32647 |
| 137 | N1 | PX  | -0.37202 | 0.00000  | 0.18751  | 0.00000  | -0.04333 |
| 138 | N1 | PY  | 0.58911  | 0.00000  | -0.04819 | 0.00000  | -0.01638 |
| 139 | N1 | PZ  | 0.00000  | -0.06299 | 0.00000  | -0.22620 | 0.00000  |
| 140 | N1 | DXX | 0.02146  | 0.00000  | 0.00995  | 0.00000  | -0.01106 |
| 141 | N1 | DYY | -0.02181 | 0.00000  | 0.03966  | 0.00000  | 0.01327  |
| 142 | N1 | DZZ | -0.01889 | 0.00000  | -0.04135 | 0.00000  | 0.02923  |
| 143 | N1 | DXY | 0.00811  | 0.00000  | -0.04159 | 0.00000  | 0.00867  |
| 144 | N1 | DXZ | 0.00000  | -0.02133 | 0.00000  | -0.00054 | 0.00000  |
| 145 | N1 | DYZ | 0.00000  | -0.03640 | 0.00000  | 0.00054  | 0.00000  |
| 146 | H6 | S   | -0.24512 | 0.00000  | -0.16397 | 0.00000  | 0.14713  |
| 147 | H6 | S   | -0.11608 | 0.00000  | 0.02561  | 0.00000  | 0.01340  |
| 148 | H6 | PX  | 0.01858  | 0.00000  | 0.00783  | 0.00000  | -0.00672 |
| 149 | H6 | PY  | 0.00091  | 0.00000  | 0.00411  | 0.00000  | -0.00853 |
| 150 | H6 | PZ  | 0.00000  | -0.00967 | 0.00000  | 0.00170  | 0.00000  |
| 151 | C8 | S   | 0.02882  | 0.00000  | -0.04853 | 0.00000  | -0.04591 |
| 152 | C8 | S   | 0.00749  | 0.00000  | 0.43293  | 0.00000  | 0.09510  |
| 153 | C8 | PX  | -0.20835 | 0.00000  | -0.08793 | 0.00000  | 0.02292  |
| 154 | C8 | PY  | -0.03254 | 0.00000  | -0.11832 | 0.00000  | -0.46663 |
| 155 | C8 | PZ  | 0.00000  | -0.27001 | 0.00000  | -0.44768 | 0.00000  |
| 156 | C8 | S   | -0.55725 | 0.00000  | -0.20012 | 0.00000  | -0.06071 |
| 157 | C8 | PX  | -0.54332 | 0.00000  | 0.39702  | 0.00000  | -0.34087 |
| 158 | C8 | PY  | -1.02123 | 0.00000  | -0.33149 | 0.00000  | 0.05370  |
| 159 | C8 | PZ  | 0.00000  | 0.48300  | 0.00000  | 0.66663  | 0.00000  |
| 160 | C8 | DXX | 0.02431  | 0.00000  | 0.05669  | 0.00000  | -0.01864 |
| 161 | C8 | DYY | 0.01403  | 0.00000  | -0.04488 | 0.00000  | -0.09506 |
| 162 | C8 | DZZ | -0.01649 | 0.00000  | 0.02926  | 0.00000  | 0.04281  |
| 163 | C8 | DXY | 0.00963  | 0.00000  | 0.06314  | 0.00000  | 0.01108  |
| 164 | C8 | DXZ | 0.00000  | 0.01257  | 0.00000  | -0.00449 | 0.00000  |
| 165 | C8 | DYZ | 0.00000  | 0.03293  | 0.00000  | -0.01304 | 0.00000  |
| 166 | H8 | S   | -0.29557 | 0.00000  | -0.10073 | 0.00000  | -0.11294 |
| 167 | H8 | S   | 0.85416  | 0.00000  | 0.12151  | 0.00000  | 0.48349  |
| 168 | H8 | PX  | -0.02851 | 0.00000  | -0.00394 | 0.00000  | -0.02843 |
| 169 | H8 | PY  | -0.00299 | 0.00000  | 0.00201  | 0.00000  | 0.01026  |
| 170 | H8 | PZ  | 0.00000  | -0.00648 | 0.00000  | -0.00451 | 0.00000  |

|     |     |     |          |          |          |          |          |
|-----|-----|-----|----------|----------|----------|----------|----------|
| 171 | C10 | S   | -0.00860 | 0.00000  | 0.05513  | 0.00000  | 0.07885  |
| 172 | C10 | S   | 0.07080  | 0.00000  | 0.11322  | 0.00000  | 0.45964  |
| 173 | C10 | PX  | -0.07025 | 0.00000  | 0.11399  | 0.00000  | -0.02502 |
| 174 | C10 | PY  | 0.01753  | 0.00000  | -0.39407 | 0.00000  | -0.29143 |
| 175 | C10 | PZ  | 0.00000  | -0.01667 | 0.00000  | 0.33851  | 0.00000  |
| 176 | C10 | S   | -0.53161 | 0.00000  | -0.92507 | 0.00000  | -1.40023 |
| 177 | C10 | PX  | 0.52250  | 0.00000  | -0.20005 | 0.00000  | 0.31852  |
| 178 | C10 | PY  | -0.09412 | 0.00000  | 0.25380  | 0.00000  | 0.33500  |
| 179 | C10 | PZ  | 0.00000  | -0.06091 | 0.00000  | -0.51099 | 0.00000  |
| 180 | C10 | DXX | 0.01349  | 0.00000  | 0.07318  | 0.00000  | 0.11999  |
| 181 | C10 | DYY | -0.02294 | 0.00000  | 0.07700  | 0.00000  | 0.16867  |
| 182 | C10 | DZZ | 0.00682  | 0.00000  | -0.05733 | 0.00000  | -0.07052 |
| 183 | C10 | DXY | -0.03341 | 0.00000  | -0.03045 | 0.00000  | -0.00694 |
| 184 | C10 | DXZ | 0.00000  | -0.00664 | 0.00000  | 0.00720  | 0.00000  |
| 185 | C10 | DYZ | 0.00000  | -0.02679 | 0.00000  | -0.01586 | 0.00000  |
| 186 | H16 | S   | 0.03736  | 0.00000  | 0.29469  | 0.00000  | 0.36124  |
| 187 | H16 | S   | -0.31175 | 0.00000  | 0.05732  | 0.00000  | -0.01681 |
| 188 | H16 | PX  | 0.00651  | 0.00000  | 0.00361  | 0.00000  | 0.02126  |
| 189 | H16 | PY  | -0.00413 | 0.00000  | -0.00812 | 0.00000  | -0.01239 |
| 190 | H16 | PZ  | 0.00000  | -0.00059 | 0.00000  | 0.00549  | 0.00000  |
| 191 | H18 | S   | -0.06046 | 0.00000  | 0.19439  | 0.00000  | 0.43865  |
| 192 | H18 | S   | 0.33605  | 0.00000  | 0.09860  | 0.00000  | 0.31388  |
| 193 | H18 | PX  | 0.00753  | 0.00000  | 0.00132  | 0.00000  | -0.00204 |
| 194 | H18 | PY  | 0.01369  | 0.00000  | -0.00916 | 0.00000  | -0.01708 |
| 195 | H18 | PZ  | 0.00000  | 0.00601  | 0.00000  | 0.00421  | 0.00000  |
| 196 | C9  | S   | 0.00492  | 0.00000  | 0.01228  | 0.00000  | -0.00963 |
| 197 | C9  | S   | -0.09949 | 0.00000  | -0.02118 | 0.00000  | -0.01051 |
| 198 | C9  | PX  | 0.22409  | 0.00000  | 0.15919  | 0.00000  | -0.03529 |
| 199 | C9  | PY  | -0.01130 | 0.00000  | 0.13336  | 0.00000  | -0.06838 |
| 200 | C9  | PZ  | 0.00000  | 0.14791  | 0.00000  | -0.08375 | 0.00000  |
| 201 | C9  | S   | 0.10245  | 0.00000  | -0.03912 | 0.00000  | 0.05151  |
| 202 | C9  | PX  | -0.27470 | 0.00000  | -0.22414 | 0.00000  | 0.09281  |
| 203 | C9  | PY  | 0.21273  | 0.00000  | -0.30930 | 0.00000  | 0.18107  |
| 204 | C9  | PZ  | 0.00000  | -0.29104 | 0.00000  | 0.05261  | 0.00000  |
| 205 | C9  | DXX | -0.00263 | 0.00000  | 0.04381  | 0.00000  | -0.01621 |
| 206 | C9  | DYY | 0.00222  | 0.00000  | -0.01622 | 0.00000  | -0.01238 |
| 207 | C9  | DZZ | -0.00663 | 0.00000  | -0.00647 | 0.00000  | 0.00646  |
| 208 | C9  | DXY | 0.05010  | 0.00000  | -0.00966 | 0.00000  | 0.00022  |
| 209 | C9  | DXZ | 0.00000  | -0.00775 | 0.00000  | 0.02976  | 0.00000  |
| 210 | C9  | DYZ | 0.00000  | -0.02486 | 0.00000  | -0.00303 | 0.00000  |
| 211 | H3  | S   | -0.02165 | 0.00000  | 0.00156  | 0.00000  | -0.06189 |
| 212 | H3  | S   | -0.17468 | 0.00000  | 0.20443  | 0.00000  | -0.07219 |
| 213 | H3  | PX  | 0.01547  | 0.00000  | -0.00217 | 0.00000  | -0.00244 |
| 214 | H3  | PY  | 0.01011  | 0.00000  | -0.00809 | 0.00000  | -0.00044 |
| 215 | H3  | PZ  | 0.00000  | -0.01020 | 0.00000  | -0.00603 | 0.00000  |
| 216 | H5  | S   | -0.01015 | -0.03438 | 0.05344  | -0.06594 | -0.01105 |
| 217 | H5  | S   | 0.06683  | -0.05369 | -0.02044 | 0.04675  | -0.02836 |
| 218 | H5  | PX  | -0.00534 | 0.01039  | 0.01084  | -0.01001 | -0.00413 |
| 219 | H5  | PY  | 0.00989  | 0.00781  | -0.00110 | -0.00142 | 0.00333  |
| 220 | H5  | PZ  | 0.00605  | -0.01059 | 0.00420  | 0.00844  | -0.00014 |
| 221 | H7  | S   | -0.01015 | 0.03438  | 0.05344  | 0.06594  | -0.01105 |
| 222 | H7  | S   | 0.06683  | 0.05369  | -0.02044 | -0.04675 | -0.02836 |
| 223 | H7  | PX  | -0.00534 | -0.01039 | 0.01084  | 0.01001  | -0.00413 |
| 224 | H7  | PY  | 0.00989  | -0.00781 | -0.00110 | 0.00142  | 0.00333  |

|              |    |     |          |          |          |          |          |
|--------------|----|-----|----------|----------|----------|----------|----------|
| 225          | H7 | PZ  | -0.00605 | -0.01059 | -0.00420 | 0.00844  | 0.00014  |
| MO:          |    |     | 86       | 87       | 88       | 89       | 90       |
| Eigenvalues: |    |     | 0.92840  | 0.96524  | 0.97925  | 0.98288  | 0.99443  |
| (ev):        |    |     | 25.26314 | 26.26542 | 26.64664 | 26.74547 | 27.05974 |
|              |    |     | A        | A        | A        | A        | A        |
| 1            | H1 | S   | -0.22739 | 0.00000  | -0.08795 | 0.00000  | 0.01319  |
| 2            | H1 | S   | 0.66028  | 0.00000  | 0.28861  | 0.00000  | 0.27057  |
| 3            | H1 | PX  | -0.01928 | 0.00000  | 0.00135  | 0.00000  | 0.00319  |
| 4            | H1 | PY  | 0.00009  | 0.00000  | -0.01430 | 0.00000  | 0.01922  |
| 5            | H1 | PZ  | 0.00000  | -0.00060 | 0.00000  | -0.02139 | 0.00000  |
| 6            | C1 | S   | -0.06019 | 0.00000  | -0.00180 | 0.00000  | -0.00057 |
| 7            | C1 | S   | -0.07939 | 0.00000  | -0.10237 | 0.00000  | -0.05336 |
| 8            | C1 | PX  | -0.25856 | 0.00000  | 0.00946  | 0.00000  | -0.05233 |
| 9            | C1 | PY  | 0.32233  | 0.00000  | -0.11620 | 0.00000  | -0.01527 |
| 10           | C1 | PZ  | 0.00000  | -0.15672 | 0.00000  | 0.46187  | 0.00000  |
| 11           | C1 | S   | 0.70415  | 0.00000  | -1.10229 | 0.00000  | 0.14230  |
| 12           | C1 | PX  | -0.84845 | 0.00000  | 0.33114  | 0.00000  | -0.33809 |
| 13           | C1 | PY  | 0.86298  | 0.00000  | -0.65986 | 0.00000  | 0.27074  |
| 14           | C1 | PZ  | 0.00000  | 0.22774  | 0.00000  | -0.95542 | 0.00000  |
| 15           | C1 | DXX | -0.12183 | 0.00000  | -0.03698 | 0.00000  | -0.02373 |
| 16           | C1 | DYY | -0.05436 | 0.00000  | -0.03478 | 0.00000  | 0.01358  |
| 17           | C1 | DZZ | 0.08502  | 0.00000  | 0.00783  | 0.00000  | 0.00287  |
| 18           | C1 | DXY | 0.00584  | 0.00000  | 0.01709  | 0.00000  | 0.03253  |
| 19           | C1 | DXZ | 0.00000  | -0.01644 | 0.00000  | -0.02301 | 0.00000  |
| 20           | C1 | DYZ | 0.00000  | 0.02710  | 0.00000  | -0.02791 | 0.00000  |
| 21           | C2 | S   | 0.05445  | 0.00000  | -0.01156 | 0.00000  | -0.02222 |
| 22           | C2 | S   | 0.08319  | 0.00000  | 0.07179  | 0.00000  | -0.12196 |
| 23           | C2 | PX  | -0.03129 | 0.00000  | 0.06610  | 0.00000  | 0.03511  |
| 24           | C2 | PY  | -0.23285 | 0.00000  | 0.08509  | 0.00000  | -0.02970 |
| 25           | C2 | PZ  | 0.00000  | 0.29503  | 0.00000  | 0.06911  | 0.00000  |
| 26           | C2 | S   | -0.58379 | 0.00000  | -0.33960 | 0.00000  | 0.18629  |
| 27           | C2 | PX  | 0.34225  | 0.00000  | -0.68502 | 0.00000  | 0.29006  |
| 28           | C2 | PY  | -1.50115 | 0.00000  | 0.46260  | 0.00000  | -0.12505 |
| 29           | C2 | PZ  | 0.00000  | -0.59174 | 0.00000  | -0.05907 | 0.00000  |
| 30           | C2 | DXX | 0.09618  | 0.00000  | 0.01214  | 0.00000  | -0.05094 |
| 31           | C2 | DYY | 0.06226  | 0.00000  | -0.05582 | 0.00000  | -0.01831 |
| 32           | C2 | DZZ | -0.06793 | 0.00000  | 0.01615  | 0.00000  | 0.02551  |
| 33           | C2 | DXY | 0.00868  | 0.00000  | -0.01874 | 0.00000  | 0.02665  |
| 34           | C2 | DXZ | 0.00000  | 0.01525  | 0.00000  | 0.02282  | 0.00000  |
| 35           | C2 | DYZ | 0.00000  | -0.00253 | 0.00000  | 0.00610  | 0.00000  |
| 36           | C3 | S   | -0.01582 | 0.00000  | 0.00863  | 0.00000  | 0.00126  |
| 37           | C3 | S   | -0.19146 | 0.00000  | 0.17739  | 0.00000  | -0.10964 |
| 38           | C3 | PX  | 0.24530  | 0.00000  | -0.04789 | 0.00000  | 0.15762  |
| 39           | C3 | PY  | -0.22289 | 0.00000  | -0.05450 | 0.00000  | 0.21939  |
| 40           | C3 | PZ  | 0.00000  | -0.65606 | 0.00000  | -0.32864 | 0.00000  |
| 41           | C3 | S   | 0.09985  | 0.00000  | -0.33674 | 0.00000  | -0.25453 |
| 42           | C3 | PX  | 0.99313  | 0.00000  | -0.52446 | 0.00000  | 0.08703  |
| 43           | C3 | PY  | 1.03287  | 0.00000  | 0.32220  | 0.00000  | -0.20462 |
| 44           | C3 | PZ  | 0.00000  | 0.98464  | 0.00000  | 0.55541  | 0.00000  |
| 45           | C3 | DXX | -0.03010 | 0.00000  | 0.01574  | 0.00000  | -0.01374 |
| 46           | C3 | DYY | -0.06806 | 0.00000  | 0.02953  | 0.00000  | 0.00150  |
| 47           | C3 | DZZ | 0.01526  | 0.00000  | -0.00399 | 0.00000  | -0.00064 |

|     |    |     |          |          |          |          |          |
|-----|----|-----|----------|----------|----------|----------|----------|
| 48  | C3 | DXY | 0.00308  | 0.00000  | -0.02449 | 0.00000  | 0.04554  |
| 49  | C3 | DXZ | 0.00000  | 0.02360  | 0.00000  | 0.00930  | 0.00000  |
| 50  | C3 | DYZ | 0.00000  | -0.02928 | 0.00000  | 0.06100  | 0.00000  |
| 51  | C4 | S   | 0.03968  | 0.00000  | -0.00085 | 0.00000  | -0.00046 |
| 52  | C4 | S   | -0.42280 | 0.00000  | -0.10270 | 0.00000  | -0.12075 |
| 53  | C4 | PX  | -0.09967 | 0.00000  | -0.24993 | 0.00000  | -0.22286 |
| 54  | C4 | PY  | 0.30436  | 0.00000  | -0.18184 | 0.00000  | -0.02685 |
| 55  | C4 | PZ  | 0.00000  | 0.57123  | 0.00000  | -0.35352 | 0.00000  |
| 56  | C4 | S   | 0.24497  | 0.00000  | 0.16905  | 0.00000  | 0.04372  |
| 57  | C4 | PX  | -1.61764 | 0.00000  | 2.18827  | 0.00000  | 0.17054  |
| 58  | C4 | PY  | 0.66486  | 0.00000  | 0.40570  | 0.00000  | 0.25751  |
| 59  | C4 | PZ  | 0.00000  | -1.05073 | 0.00000  | 0.83654  | 0.00000  |
| 60  | C4 | DXX | 0.02670  | 0.00000  | 0.02731  | 0.00000  | -0.00776 |
| 61  | C4 | DYY | -0.00806 | 0.00000  | -0.01026 | 0.00000  | 0.01808  |
| 62  | C4 | DZZ | -0.04244 | 0.00000  | -0.01901 | 0.00000  | -0.00926 |
| 63  | C4 | DXY | -0.05513 | 0.00000  | -0.00604 | 0.00000  | -0.00057 |
| 64  | C4 | DXZ | 0.00000  | -0.00308 | 0.00000  | -0.00181 | 0.00000  |
| 65  | C4 | DYZ | 0.00000  | 0.00274  | 0.00000  | -0.03244 | 0.00000  |
| 66  | C5 | S   | -0.04468 | 0.00000  | 0.00929  | 0.00000  | 0.02025  |
| 67  | C5 | S   | 0.20510  | 0.00000  | 0.22005  | 0.00000  | 0.01768  |
| 68  | C5 | PX  | 0.09496  | 0.00000  | 0.13582  | 0.00000  | 0.07697  |
| 69  | C5 | PY  | -0.18193 | 0.00000  | 0.28917  | 0.00000  | -0.03707 |
| 70  | C5 | PZ  | 0.00000  | -0.34308 | 0.00000  | 0.18726  | 0.00000  |
| 71  | C5 | S   | 0.30636  | 0.00000  | 0.63749  | 0.00000  | -0.00097 |
| 72  | C5 | PX  | -1.20725 | 0.00000  | 1.06499  | 0.00000  | -0.33890 |
| 73  | C5 | PY  | -1.33336 | 0.00000  | -0.23281 | 0.00000  | 0.08220  |
| 74  | C5 | PZ  | 0.00000  | 0.80194  | 0.00000  | -0.42748 | 0.00000  |
| 75  | C5 | DXX | -0.02576 | 0.00000  | 0.08261  | 0.00000  | 0.03927  |
| 76  | C5 | DYY | -0.03889 | 0.00000  | 0.05840  | 0.00000  | 0.01858  |
| 77  | C5 | DZZ | 0.05420  | 0.00000  | -0.03352 | 0.00000  | -0.01455 |
| 78  | C5 | DXY | 0.01276  | 0.00000  | 0.01603  | 0.00000  | -0.03728 |
| 79  | C5 | DXZ | 0.00000  | 0.00210  | 0.00000  | 0.01801  | 0.00000  |
| 80  | C5 | DYZ | 0.00000  | -0.01292 | 0.00000  | -0.01392 | 0.00000  |
| 81  | C6 | S   | 0.00153  | 0.00000  | 0.02067  | 0.00000  | -0.05143 |
| 82  | C6 | S   | 0.25154  | 0.00000  | -0.18898 | 0.00000  | 0.08236  |
| 83  | C6 | PX  | -0.09277 | 0.00000  | 0.02622  | 0.00000  | 0.13379  |
| 84  | C6 | PY  | 0.29305  | 0.00000  | 0.15482  | 0.00000  | -0.39844 |
| 85  | C6 | PZ  | 0.00000  | -0.05743 | 0.00000  | -0.24174 | 0.00000  |
| 86  | C6 | S   | -0.49502 | 0.00000  | 0.74267  | 0.00000  | -0.17584 |
| 87  | C6 | PX  | 1.81713  | 0.00000  | -0.61606 | 0.00000  | 0.03615  |
| 88  | C6 | PY  | -0.46637 | 0.00000  | -0.20521 | 0.00000  | 0.44290  |
| 89  | C6 | PZ  | 0.00000  | 0.03948  | 0.00000  | 0.25618  | 0.00000  |
| 90  | C6 | DXX | 0.01698  | 0.00000  | -0.03489 | 0.00000  | 0.02796  |
| 91  | C6 | DYY | 0.05590  | 0.00000  | 0.06795  | 0.00000  | -0.14939 |
| 92  | C6 | DZZ | 0.00450  | 0.00000  | -0.02703 | 0.00000  | 0.05653  |
| 93  | C6 | DXY | -0.01589 | 0.00000  | -0.00790 | 0.00000  | -0.00547 |
| 94  | C6 | DXZ | 0.00000  | -0.02291 | 0.00000  | -0.02952 | 0.00000  |
| 95  | C6 | DYZ | 0.00000  | 0.01448  | 0.00000  | -0.00149 | 0.00000  |
| 96  | C7 | S   | 0.03062  | 0.00000  | -0.00724 | 0.00000  | -0.00276 |
| 97  | C7 | S   | -0.02730 | 0.00000  | 0.13868  | 0.00000  | -0.03185 |
| 98  | C7 | PX  | 0.11182  | 0.00000  | -0.05371 | 0.00000  | 0.16538  |
| 99  | C7 | PY  | -0.07571 | 0.00000  | 0.11411  | 0.00000  | -0.00520 |
| 100 | C7 | PZ  | 0.00000  | 0.45724  | 0.00000  | -0.17679 | 0.00000  |
| 101 | C7 | S   | 0.48636  | 0.00000  | 0.23891  | 0.00000  | 0.14995  |

|     |    |     |          |          |          |          |          |
|-----|----|-----|----------|----------|----------|----------|----------|
| 102 | C7 | PX  | -0.49509 | 0.00000  | 0.06416  | 0.00000  | -0.79854 |
| 103 | C7 | PY  | -0.81085 | 0.00000  | 0.02140  | 0.00000  | 0.25584  |
| 104 | C7 | PZ  | 0.00000  | -0.78415 | 0.00000  | 0.38328  | 0.00000  |
| 105 | C7 | DXX | 0.03612  | 0.00000  | -0.00905 | 0.00000  | 0.03184  |
| 106 | C7 | DYY | 0.04948  | 0.00000  | 0.02094  | 0.00000  | -0.01289 |
| 107 | C7 | DZZ | -0.03690 | 0.00000  | 0.00678  | 0.00000  | -0.00672 |
| 108 | C7 | DXY | -0.01621 | 0.00000  | -0.01986 | 0.00000  | 0.03674  |
| 109 | C7 | DXZ | 0.00000  | -0.00995 | 0.00000  | 0.01139  | 0.00000  |
| 110 | C7 | DYZ | 0.00000  | -0.01842 | 0.00000  | -0.02856 | 0.00000  |
| 111 | O1 | S   | 0.00894  | 0.00000  | 0.00058  | 0.00000  | 0.00404  |
| 112 | O1 | S   | 0.01789  | 0.00000  | -0.17890 | 0.00000  | -0.09474 |
| 113 | O1 | PX  | 0.06824  | 0.00000  | -0.27921 | 0.00000  | -0.08834 |
| 114 | O1 | PY  | -0.08245 | 0.00000  | -0.02057 | 0.00000  | -0.04542 |
| 115 | O1 | PZ  | 0.00000  | 0.08761  | 0.00000  | 0.01137  | 0.00000  |
| 116 | O1 | S   | -0.36982 | 0.00000  | 0.21415  | 0.00000  | 0.03654  |
| 117 | O1 | PX  | 0.22220  | 0.00000  | -0.08799 | 0.00000  | 0.06574  |
| 118 | O1 | PY  | 0.15115  | 0.00000  | -0.15725 | 0.00000  | -0.02579 |
| 119 | O1 | PZ  | 0.00000  | 0.03685  | 0.00000  | -0.13447 | 0.00000  |
| 120 | O1 | DXX | 0.00140  | 0.00000  | 0.01741  | 0.00000  | -0.00606 |
| 121 | O1 | DYY | 0.00212  | 0.00000  | -0.11471 | 0.00000  | -0.05759 |
| 122 | O1 | DZZ | 0.01727  | 0.00000  | -0.04325 | 0.00000  | -0.01168 |
| 123 | O1 | DXY | 0.01307  | 0.00000  | -0.02009 | 0.00000  | 0.00139  |
| 124 | O1 | DXZ | 0.00000  | -0.02201 | 0.00000  | -0.02728 | 0.00000  |
| 125 | O1 | DYZ | 0.00000  | -0.02331 | 0.00000  | 0.01362  | 0.00000  |
| 126 | H4 | S   | -0.22350 | 0.00000  | 0.13963  | 0.00000  | 0.17361  |
| 127 | H4 | S   | 0.23587  | 0.00000  | 0.41663  | 0.00000  | -0.31007 |
| 128 | H4 | PX  | -0.00223 | 0.00000  | -0.00424 | 0.00000  | -0.02445 |
| 129 | H4 | PY  | -0.01488 | 0.00000  | -0.00969 | 0.00000  | 0.01085  |
| 130 | H4 | PZ  | 0.00000  | 0.00416  | 0.00000  | -0.01005 | 0.00000  |
| 131 | N1 | S   | -0.00401 | 0.00000  | -0.01076 | 0.00000  | 0.02509  |
| 132 | N1 | S   | 0.04179  | 0.00000  | -0.00154 | 0.00000  | -0.04174 |
| 133 | N1 | PX  | 0.00605  | 0.00000  | 0.23705  | 0.00000  | -0.52713 |
| 134 | N1 | PY  | 0.07243  | 0.00000  | 0.16293  | 0.00000  | -0.35099 |
| 135 | N1 | PZ  | 0.00000  | 0.03789  | 0.00000  | 0.14075  | 0.00000  |
| 136 | N1 | S   | -0.37754 | 0.00000  | -0.53573 | 0.00000  | 0.91469  |
| 137 | N1 | PX  | -0.56519 | 0.00000  | -0.21224 | 0.00000  | 0.82705  |
| 138 | N1 | PY  | 0.35273  | 0.00000  | -0.20536 | 0.00000  | 0.11667  |
| 139 | N1 | PZ  | 0.00000  | -0.03380 | 0.00000  | 0.03233  | 0.00000  |
| 140 | N1 | DXX | 0.00986  | 0.00000  | -0.04723 | 0.00000  | 0.08964  |
| 141 | N1 | DYY | -0.03924 | 0.00000  | -0.08362 | 0.00000  | 0.15134  |
| 142 | N1 | DZZ | 0.01075  | 0.00000  | 0.03039  | 0.00000  | -0.04902 |
| 143 | N1 | DXY | 0.02064  | 0.00000  | 0.01038  | 0.00000  | -0.02072 |
| 144 | N1 | DXZ | 0.00000  | 0.02497  | 0.00000  | 0.03435  | 0.00000  |
| 145 | N1 | DYZ | 0.00000  | -0.01414 | 0.00000  | -0.01616 | 0.00000  |
| 146 | H6 | S   | 0.24167  | 0.00000  | -0.07412 | 0.00000  | -0.02869 |
| 147 | H6 | S   | -0.22961 | 0.00000  | -0.22849 | 0.00000  | 0.19131  |
| 148 | H6 | PX  | -0.01792 | 0.00000  | -0.00119 | 0.00000  | 0.00098  |
| 149 | H6 | PY  | -0.00930 | 0.00000  | 0.00590  | 0.00000  | -0.00339 |
| 150 | H6 | PZ  | 0.00000  | -0.00855 | 0.00000  | -0.00622 | 0.00000  |
| 151 | C8 | S   | 0.01030  | 0.00000  | -0.00277 | 0.00000  | -0.00701 |
| 152 | C8 | S   | 0.16149  | 0.00000  | -0.13576 | 0.00000  | 0.24649  |
| 153 | C8 | PX  | 0.08873  | 0.00000  | 0.14909  | 0.00000  | -0.31373 |
| 154 | C8 | PY  | 0.10064  | 0.00000  | -0.16715 | 0.00000  | 0.27296  |
| 155 | C8 | PZ  | 0.00000  | 0.12806  | 0.00000  | 0.72622  | 0.00000  |

|     |     |     |          |          |          |          |          |
|-----|-----|-----|----------|----------|----------|----------|----------|
| 156 | C8  | S   | -0.35120 | 0.00000  | 0.37545  | 0.00000  | -1.07949 |
| 157 | C8  | PX  | -1.02773 | 0.00000  | -0.33543 | 0.00000  | 0.90358  |
| 158 | C8  | PY  | -0.55340 | 0.00000  | 0.42030  | 0.00000  | -0.89606 |
| 159 | C8  | PZ  | 0.00000  | -0.09818 | 0.00000  | -1.27280 | 0.00000  |
| 160 | C8  | DXX | 0.01000  | 0.00000  | 0.02415  | 0.00000  | -0.06812 |
| 161 | C8  | DYY | 0.03283  | 0.00000  | -0.03588 | 0.00000  | 0.04277  |
| 162 | C8  | DZZ | 0.00230  | 0.00000  | -0.00695 | 0.00000  | 0.02738  |
| 163 | C8  | DXY | -0.03100 | 0.00000  | -0.02628 | 0.00000  | 0.05697  |
| 164 | C8  | DXZ | 0.00000  | -0.01367 | 0.00000  | -0.01873 | 0.00000  |
| 165 | C8  | DYZ | 0.00000  | 0.04628  | 0.00000  | 0.03309  | 0.00000  |
| 166 | H8  | S   | 0.13098  | 0.00000  | -0.00663 | 0.00000  | 0.03386  |
| 167 | H8  | S   | 0.06326  | 0.00000  | -0.02369 | 0.00000  | 0.36900  |
| 168 | H8  | PX  | 0.00491  | 0.00000  | -0.00011 | 0.00000  | -0.01372 |
| 169 | H8  | PY  | -0.01404 | 0.00000  | -0.00314 | 0.00000  | 0.00639  |
| 170 | H8  | PZ  | 0.00000  | -0.00923 | 0.00000  | 0.01094  | 0.00000  |
| 171 | C10 | S   | -0.00015 | 0.00000  | 0.01482  | 0.00000  | -0.02336 |
| 172 | C10 | S   | 0.15640  | 0.00000  | 0.03953  | 0.00000  | -0.15118 |
| 173 | C10 | PX  | -0.08370 | 0.00000  | 0.00808  | 0.00000  | -0.04121 |
| 174 | C10 | PY  | 0.05822  | 0.00000  | -0.08002 | 0.00000  | 0.09289  |
| 175 | C10 | PZ  | 0.00000  | -0.18885 | 0.00000  | -0.26368 | 0.00000  |
| 176 | C10 | S   | -0.38094 | 0.00000  | 0.02799  | 0.00000  | 0.00759  |
| 177 | C10 | PX  | 0.47880  | 0.00000  | 0.03097  | 0.00000  | 0.02850  |
| 178 | C10 | PY  | -0.05516 | 0.00000  | 0.09845  | 0.00000  | -0.11322 |
| 179 | C10 | PZ  | 0.00000  | 0.27487  | 0.00000  | 0.64716  | 0.00000  |
| 180 | C10 | DXX | 0.02142  | 0.00000  | 0.00682  | 0.00000  | -0.01809 |
| 181 | C10 | DYY | -0.00313 | 0.00000  | 0.03757  | 0.00000  | -0.06296 |
| 182 | C10 | DZZ | 0.00489  | 0.00000  | -0.01541 | 0.00000  | 0.02370  |
| 183 | C10 | DXY | -0.00588 | 0.00000  | -0.00204 | 0.00000  | 0.00431  |
| 184 | C10 | DXZ | 0.00000  | -0.01134 | 0.00000  | 0.00449  | 0.00000  |
| 185 | C10 | DYZ | 0.00000  | -0.01745 | 0.00000  | 0.00594  | 0.00000  |
| 186 | H16 | S   | 0.06160  | 0.00000  | 0.04543  | 0.00000  | -0.11075 |
| 187 | H16 | S   | -0.21335 | 0.00000  | 0.01788  | 0.00000  | -0.07932 |
| 188 | H16 | PX  | 0.00837  | 0.00000  | -0.00060 | 0.00000  | 0.00480  |
| 189 | H16 | PY  | -0.01045 | 0.00000  | -0.01035 | 0.00000  | 0.02196  |
| 190 | H16 | PZ  | 0.00000  | -0.00077 | 0.00000  | 0.00816  | 0.00000  |
| 191 | H18 | S   | -0.01020 | 0.00000  | 0.04418  | 0.00000  | -0.03795 |
| 192 | H18 | S   | 0.22168  | 0.00000  | -0.00319 | 0.00000  | 0.03310  |
| 193 | H18 | PX  | -0.00048 | 0.00000  | 0.00039  | 0.00000  | 0.00272  |
| 194 | H18 | PY  | 0.01279  | 0.00000  | 0.00140  | 0.00000  | -0.00552 |
| 195 | H18 | PZ  | 0.00000  | 0.00649  | 0.00000  | 0.00355  | 0.00000  |
| 196 | C9  | S   | -0.01667 | 0.00000  | -0.04403 | 0.00000  | -0.03362 |
| 197 | C9  | S   | 0.07124  | 0.00000  | -0.11890 | 0.00000  | -0.07189 |
| 198 | C9  | PX  | 0.18050  | 0.00000  | -0.02766 | 0.00000  | 0.07048  |
| 199 | C9  | PY  | -0.20128 | 0.00000  | -0.60655 | 0.00000  | -0.30858 |
| 200 | C9  | PZ  | 0.00000  | -0.14874 | 0.00000  | -0.17265 | 0.00000  |
| 201 | C9  | S   | 0.01042  | 0.00000  | 0.85278  | 0.00000  | 0.51585  |
| 202 | C9  | PX  | -0.23178 | 0.00000  | -0.03914 | 0.00000  | -0.10921 |
| 203 | C9  | PY  | 0.58116  | 0.00000  | 1.66054  | 0.00000  | 0.91428  |
| 204 | C9  | PZ  | 0.00000  | 0.32304  | 0.00000  | 0.19766  | 0.00000  |
| 205 | C9  | DXX | 0.01338  | 0.00000  | -0.11671 | 0.00000  | -0.04676 |
| 206 | C9  | DYY | -0.04070 | 0.00000  | 0.07667  | 0.00000  | -0.00633 |
| 207 | C9  | DZZ | 0.01510  | 0.00000  | -0.04431 | 0.00000  | -0.01481 |
| 208 | C9  | DXY | 0.01926  | 0.00000  | 0.03792  | 0.00000  | 0.03050  |
| 209 | C9  | DXZ | 0.00000  | 0.00711  | 0.00000  | 0.05762  | 0.00000  |

|     |    |     |          |          |          |          |          |
|-----|----|-----|----------|----------|----------|----------|----------|
| 210 | C9 | DYZ | 0.00000  | 0.03534  | 0.00000  | -0.02829 | 0.00000  |
| 211 | H3 | S   | -0.25672 | 0.00000  | -0.10202 | 0.00000  | -0.21540 |
| 212 | H3 | S   | -0.15471 | 0.00000  | -1.27083 | 0.00000  | -0.57564 |
| 213 | H3 | PX  | -0.00150 | 0.00000  | 0.02033  | 0.00000  | 0.00999  |
| 214 | H3 | PY  | 0.00351  | 0.00000  | 0.06183  | 0.00000  | 0.01947  |
| 215 | H3 | PZ  | 0.00000  | 0.01590  | 0.00000  | -0.01793 | 0.00000  |
| 216 | H5 | S   | 0.00874  | 0.02411  | -0.26379 | -0.15642 | -0.13565 |
| 217 | H5 | S   | 0.02044  | 0.07300  | 0.17017  | 0.22212  | 0.05723  |
| 218 | H5 | PX  | -0.00858 | -0.01544 | -0.04466 | -0.02015 | -0.02384 |
| 219 | H5 | PY  | 0.01640  | -0.01355 | 0.00540  | 0.00499  | 0.01525  |
| 220 | H5 | PZ  | 0.01613  | 0.01128  | 0.02346  | 0.01714  | 0.01656  |
| 221 | H7 | S   | 0.00874  | -0.02411 | -0.26379 | 0.15642  | -0.13565 |
| 222 | H7 | S   | 0.02044  | -0.07300 | 0.17017  | -0.22212 | 0.05723  |
| 223 | H7 | PX  | -0.00858 | 0.01544  | -0.04466 | 0.02015  | -0.02384 |
| 224 | H7 | PY  | 0.01640  | 0.01355  | 0.00540  | -0.00499 | 0.01525  |
| 225 | H7 | PZ  | -0.01613 | 0.01128  | -0.02346 | 0.01714  | -0.01656 |

|              |          |          |          |          |          |
|--------------|----------|----------|----------|----------|----------|
| MO:          | 91       | 92       | 93       | 94       | 95       |
| Eigenvalues: | 1.03696  | 1.05039  | 1.05945  | 1.08470  | 1.09571  |
| (ev):        | 28.21712 | 28.58250 | 28.82904 | 29.51622 | 29.81568 |

|    |    |     |          |          |          |          |          |
|----|----|-----|----------|----------|----------|----------|----------|
|    |    | A   | A        | A        | A        | A        |          |
| 1  | H1 | S   | 0.00000  | -0.03631 | -0.15787 | -0.24662 | 0.05396  |
| 2  | H1 | S   | 0.00000  | -0.18511 | 0.99060  | 1.69870  | -0.46265 |
| 3  | H1 | PX  | 0.00000  | 0.00583  | -0.05003 | -0.09496 | 0.02362  |
| 4  | H1 | PY  | 0.00000  | 0.00476  | -0.03914 | -0.04044 | -0.00215 |
| 5  | H1 | PZ  | -0.02666 | 0.00000  | 0.00000  | 0.00000  | 0.00000  |
| 6  | C1 | S   | 0.00000  | -0.00128 | -0.02001 | -0.02458 | 0.01016  |
| 7  | C1 | S   | 0.00000  | 0.12555  | 0.20064  | 0.28612  | -0.04367 |
| 8  | C1 | PX  | 0.00000  | -0.12678 | 0.31169  | 0.55259  | -0.14050 |
| 9  | C1 | PY  | 0.00000  | 0.01865  | 0.04827  | 0.28326  | -0.05161 |
| 10 | C1 | PZ  | 0.12260  | 0.00000  | 0.00000  | 0.00000  | 0.00000  |
| 11 | C1 | S   | 0.00000  | -0.13628 | -0.37854 | -0.24934 | -0.95596 |
| 12 | C1 | PX  | 0.00000  | 0.36586  | -1.12336 | -2.05295 | 0.87377  |
| 13 | C1 | PY  | 0.00000  | 0.08707  | -0.29613 | -1.01430 | 0.48399  |
| 14 | C1 | PZ  | -0.70709 | 0.00000  | 0.00000  | 0.00000  | 0.00000  |
| 15 | C1 | DXX | 0.00000  | 0.01169  | -0.04465 | -0.08361 | 0.00533  |
| 16 | C1 | DYY | 0.00000  | -0.00295 | 0.01047  | 0.06174  | -0.00869 |
| 17 | C1 | DZZ | 0.00000  | 0.00592  | 0.05267  | 0.04646  | -0.00736 |
| 18 | C1 | DXY | 0.00000  | -0.00881 | -0.06935 | -0.04084 | 0.01642  |
| 19 | C1 | DXZ | -0.01467 | 0.00000  | 0.00000  | 0.00000  | 0.00000  |
| 20 | C1 | DYZ | -0.01162 | 0.00000  | 0.00000  | 0.00000  | 0.00000  |
| 21 | C2 | S   | 0.00000  | 0.00532  | 0.00078  | -0.01145 | 0.02793  |
| 22 | C2 | S   | 0.00000  | -0.25025 | -0.10659 | 0.14916  | -0.41492 |
| 23 | C2 | PX  | 0.00000  | 0.10230  | 0.05869  | -0.26949 | 0.57143  |
| 24 | C2 | PY  | 0.00000  | 0.05687  | 0.11160  | -0.12437 | 0.19551  |
| 25 | C2 | PZ  | -0.34990 | 0.00000  | 0.00000  | 0.00000  | 0.00000  |
| 26 | C2 | S   | 0.00000  | -0.35057 | 0.04718  | 0.32318  | 0.91828  |
| 27 | C2 | PX  | 0.00000  | -0.55561 | -0.28901 | 1.28879  | -2.08669 |
| 28 | C2 | PY  | 0.00000  | -0.42664 | -0.23626 | 0.58434  | -0.54618 |
| 29 | C2 | PZ  | 1.03970  | 0.00000  | 0.00000  | 0.00000  | 0.00000  |
| 30 | C2 | DXX | 0.00000  | -0.01552 | 0.01682  | -0.04066 | 0.07138  |
| 31 | C2 | DYY | 0.00000  | -0.02843 | -0.02017 | 0.05691  | -0.04275 |
| 32 | C2 | DZZ | 0.00000  | 0.00337  | -0.01192 | 0.01716  | -0.05721 |



|    |    |     |          |          |          |          |          |
|----|----|-----|----------|----------|----------|----------|----------|
| 33 | C2 | DXY | 0.00000  | 0.01592  | 0.00812  | 0.00467  | 0.07006  |
| 34 | C2 | DXZ | -0.01632 | 0.00000  | 0.00000  | 0.00000  | 0.00000  |
| 35 | C2 | DYZ | 0.02082  | 0.00000  | 0.00000  | 0.00000  | 0.00000  |
| 36 | C3 | S   | 0.00000  | 0.00077  | -0.01559 | 0.00988  | -0.00206 |
| 37 | C3 | S   | 0.00000  | 0.06431  | -0.19429 | 0.21427  | 0.09247  |
| 38 | C3 | PX  | 0.00000  | 0.06778  | -0.03138 | -0.21534 | 0.00341  |
| 39 | C3 | PY  | 0.00000  | -0.13295 | -0.09612 | 0.12525  | 0.07870  |
| 40 | C3 | PZ  | -0.55244 | 0.00000  | 0.00000  | 0.00000  | 0.00000  |
| 41 | C3 | S   | 0.00000  | -0.23682 | -1.02897 | -1.11290 | -0.09854 |
| 42 | C3 | PX  | 0.00000  | -0.45898 | 0.44022  | 1.04085  | 0.35349  |
| 43 | C3 | PY  | 0.00000  | 0.59842  | 0.56292  | -0.68465 | 0.33064  |
| 44 | C3 | PZ  | 1.42463  | 0.00000  | 0.00000  | 0.00000  | 0.00000  |
| 45 | C3 | DXX | 0.00000  | -0.00435 | -0.00628 | 0.04126  | -0.01991 |
| 46 | C3 | DYY | 0.00000  | 0.00039  | -0.10795 | -0.03508 | 0.03570  |
| 47 | C3 | DZZ | 0.00000  | 0.01075  | 0.03117  | 0.00802  | 0.00634  |
| 48 | C3 | DXY | 0.00000  | 0.03313  | 0.03595  | -0.02265 | 0.00239  |
| 49 | C3 | DXZ | -0.01113 | 0.00000  | 0.00000  | 0.00000  | 0.00000  |
| 50 | C3 | DYZ | -0.00228 | 0.00000  | 0.00000  | 0.00000  | 0.00000  |
| 51 | C4 | S   | 0.00000  | 0.00982  | 0.00137  | -0.00570 | -0.03230 |
| 52 | C4 | S   | 0.00000  | 0.14070  | 0.05695  | -0.04576 | -0.00212 |
| 53 | C4 | PX  | 0.00000  | -0.06726 | 0.08550  | -0.06239 | -0.03773 |
| 54 | C4 | PY  | 0.00000  | -0.03284 | -0.03421 | -0.01374 | 0.09524  |
| 55 | C4 | PZ  | -0.24153 | 0.00000  | 0.00000  | 0.00000  | 0.00000  |
| 56 | C4 | S   | 0.00000  | -0.10206 | -0.22687 | -0.10039 | -0.55333 |
| 57 | C4 | PX  | 0.00000  | -0.02167 | -0.17409 | 0.19109  | 0.66243  |
| 58 | C4 | PY  | 0.00000  | 0.41599  | 0.46689  | 0.34399  | -1.50605 |
| 59 | C4 | PZ  | 0.75603  | 0.00000  | 0.00000  | 0.00000  | 0.00000  |
| 60 | C4 | DXX | 0.00000  | 0.01456  | 0.01540  | 0.02035  | -0.03016 |
| 61 | C4 | DYY | 0.00000  | 0.03085  | -0.01206 | -0.04563 | -0.11498 |
| 62 | C4 | DZZ | 0.00000  | -0.00533 | 0.00606  | 0.00856  | 0.03968  |
| 63 | C4 | DXY | 0.00000  | -0.02447 | 0.02419  | 0.04012  | -0.06221 |
| 64 | C4 | DXZ | -0.00939 | 0.00000  | 0.00000  | 0.00000  | 0.00000  |
| 65 | C4 | DYZ | -0.02157 | 0.00000  | 0.00000  | 0.00000  | 0.00000  |
| 66 | C5 | S   | 0.00000  | -0.00395 | 0.01022  | 0.01747  | -0.00484 |
| 67 | C5 | S   | 0.00000  | 0.08271  | 0.03889  | -0.09143 | -0.60564 |
| 68 | C5 | PX  | 0.00000  | -0.11692 | 0.15902  | 0.24441  | 0.03173  |
| 69 | C5 | PY  | 0.00000  | -0.00030 | -0.02739 | -0.24496 | -0.34615 |
| 70 | C5 | PZ  | 0.28413  | 0.00000  | 0.00000  | 0.00000  | 0.00000  |
| 71 | C5 | S   | 0.00000  | 0.33898  | 0.13620  | -0.21827 | 1.91362  |
| 72 | C5 | PX  | 0.00000  | 0.25490  | -0.32178 | -0.83575 | 0.31499  |
| 73 | C5 | PY  | 0.00000  | -0.53402 | 0.01922  | 1.05320  | 1.09794  |
| 74 | C5 | PZ  | -0.82824 | 0.00000  | 0.00000  | 0.00000  | 0.00000  |
| 75 | C5 | DXX | 0.00000  | 0.00910  | 0.01528  | 0.04339  | -0.06258 |
| 76 | C5 | DYY | 0.00000  | 0.01089  | 0.02702  | -0.02812 | 0.01455  |
| 77 | C5 | DZZ | 0.00000  | 0.00798  | -0.01086 | -0.02255 | -0.03272 |
| 78 | C5 | DXY | 0.00000  | 0.02302  | -0.02535 | -0.05637 | -0.03494 |
| 79 | C5 | DXZ | 0.00850  | 0.00000  | 0.00000  | 0.00000  | 0.00000  |
| 80 | C5 | DYZ | -0.00531 | 0.00000  | 0.00000  | 0.00000  | 0.00000  |
| 81 | C6 | S   | 0.00000  | -0.00145 | 0.00849  | -0.00332 | -0.01131 |
| 82 | C6 | S   | 0.00000  | -0.51445 | -0.12791 | -0.13738 | 0.01389  |
| 83 | C6 | PX  | 0.00000  | 0.12802  | 0.03015  | -0.01099 | -0.06690 |
| 84 | C6 | PY  | 0.00000  | 0.32950  | 0.18391  | -0.00062 | -0.07714 |
| 85 | C6 | PZ  | 0.61103  | 0.00000  | 0.00000  | 0.00000  | 0.00000  |
| 86 | C6 | S   | 0.00000  | -0.40963 | 0.03941  | 0.66179  | 0.52865  |

|     |    |     |          |          |          |          |          |
|-----|----|-----|----------|----------|----------|----------|----------|
| 87  | C6 | PX  | 0.00000  | -0.49228 | -0.03284 | 0.29020  | 0.40371  |
| 88  | C6 | PY  | 0.00000  | 0.47921  | 0.34456  | -0.33203 | 1.19635  |
| 89  | C6 | PZ  | -1.45643 | 0.00000  | 0.00000  | 0.00000  | 0.00000  |
| 90  | C6 | DXX | 0.00000  | -0.07163 | -0.00733 | 0.01753  | 0.00777  |
| 91  | C6 | DYY | 0.00000  | -0.08556 | -0.00911 | -0.02179 | 0.00964  |
| 92  | C6 | DZZ | 0.00000  | 0.01326  | -0.00382 | -0.00748 | -0.00035 |
| 93  | C6 | DXY | 0.00000  | 0.04219  | 0.02026  | 0.04583  | -0.03169 |
| 94  | C6 | DXZ | 0.02212  | 0.00000  | 0.00000  | 0.00000  | 0.00000  |
| 95  | C6 | DYZ | -0.03439 | 0.00000  | 0.00000  | 0.00000  | 0.00000  |
| 96  | C7 | S   | 0.00000  | 0.01274  | -0.03250 | -0.00345 | -0.00045 |
| 97  | C7 | S   | 0.00000  | -0.01508 | 0.17870  | 0.26854  | -0.06528 |
| 98  | C7 | PX  | 0.00000  | -0.08260 | 0.73399  | 0.04456  | 0.00203  |
| 99  | C7 | PY  | 0.00000  | -0.18322 | 0.02451  | 0.11007  | 0.01669  |
| 100 | C7 | PZ  | 0.16376  | 0.00000  | 0.00000  | 0.00000  | 0.00000  |
| 101 | C7 | S   | 0.00000  | 1.10378  | 0.11877  | -0.16220 | 0.24397  |
| 102 | C7 | PX  | 0.00000  | -0.30898 | -3.10671 | -0.34940 | -0.07334 |
| 103 | C7 | PY  | 0.00000  | 0.31428  | 0.06300  | -0.63836 | -0.18943 |
| 104 | C7 | PZ  | -0.71505 | 0.00000  | 0.00000  | 0.00000  | 0.00000  |
| 105 | C7 | DXX | 0.00000  | 0.03544  | -0.06211 | 0.00245  | -0.00053 |
| 106 | C7 | DYY | 0.00000  | 0.03177  | 0.04087  | 0.04434  | -0.00892 |
| 107 | C7 | DZZ | 0.00000  | -0.01744 | 0.05805  | 0.00770  | -0.00380 |
| 108 | C7 | DXY | 0.00000  | -0.02436 | -0.01239 | 0.04876  | 0.00348  |
| 109 | C7 | DXZ | 0.01713  | 0.00000  | 0.00000  | 0.00000  | 0.00000  |
| 110 | C7 | DYZ | -0.00476 | 0.00000  | 0.00000  | 0.00000  | 0.00000  |
| 111 | O1 | S   | 0.00000  | 0.00353  | 0.00103  | 0.00106  | -0.01010 |
| 112 | O1 | S   | 0.00000  | -0.00739 | 0.03450  | 0.09153  | 0.14602  |
| 113 | O1 | PX  | 0.00000  | 0.05402  | 0.00064  | -0.00665 | 0.02284  |
| 114 | O1 | PY  | 0.00000  | -0.00856 | -0.00443 | 0.02611  | 0.33820  |
| 115 | O1 | PZ  | 0.05845  | 0.00000  | 0.00000  | 0.00000  | 0.00000  |
| 116 | O1 | S   | 0.00000  | -0.17232 | -0.18604 | -0.25715 | 0.45353  |
| 117 | O1 | PX  | 0.00000  | -0.02427 | 0.05826  | 0.07036  | -0.05283 |
| 118 | O1 | PY  | 0.00000  | 0.12283  | 0.08360  | 0.01320  | -0.79896 |
| 119 | O1 | PZ  | -0.18666 | 0.00000  | 0.00000  | 0.00000  | 0.00000  |
| 120 | O1 | DXX | 0.00000  | -0.00775 | 0.01303  | 0.03607  | 0.06983  |
| 121 | O1 | DYY | 0.00000  | -0.01199 | 0.00309  | 0.01809  | 0.08832  |
| 122 | O1 | DZZ | 0.00000  | 0.00131  | 0.01074  | 0.03348  | 0.02293  |
| 123 | O1 | DXY | 0.00000  | 0.00550  | -0.00517 | 0.01055  | 0.00777  |
| 124 | O1 | DXZ | -0.01964 | 0.00000  | 0.00000  | 0.00000  | 0.00000  |
| 125 | O1 | DYZ | 0.00163  | 0.00000  | 0.00000  | 0.00000  | 0.00000  |
| 126 | H4 | S   | 0.00000  | -0.06353 | 0.05412  | 0.18933  | 0.01884  |
| 127 | H4 | S   | 0.00000  | 0.33268  | -0.25393 | -0.94894 | -0.76371 |
| 128 | H4 | PX  | 0.00000  | 0.00485  | -0.01243 | -0.04372 | -0.04017 |
| 129 | H4 | PY  | 0.00000  | -0.01919 | 0.01665  | 0.04080  | 0.03091  |
| 130 | H4 | PZ  | -0.01797 | 0.00000  | 0.00000  | 0.00000  | 0.00000  |
| 131 | N1 | S   | 0.00000  | -0.06139 | -0.01427 | -0.00338 | 0.00197  |
| 132 | N1 | S   | 0.00000  | 0.20014  | 0.00156  | 0.06143  | -0.07354 |
| 133 | N1 | PX  | 0.00000  | -0.31201 | -0.01927 | 0.03029  | 0.09529  |
| 134 | N1 | PY  | 0.00000  | -0.17821 | 0.02157  | -0.04711 | -0.08478 |
| 135 | N1 | PZ  | 0.15801  | 0.00000  | 0.00000  | 0.00000  | 0.00000  |
| 136 | N1 | S   | 0.00000  | 0.26729  | 1.13423  | -0.84569 | 0.37370  |
| 137 | N1 | PX  | 0.00000  | 0.89785  | 0.38862  | -0.14733 | -0.32382 |
| 138 | N1 | PY  | 0.00000  | 1.23290  | 0.31677  | 0.08477  | 0.33164  |
| 139 | N1 | PZ  | -0.05732 | 0.00000  | 0.00000  | 0.00000  | 0.00000  |
| 140 | N1 | DXX | 0.00000  | -0.05617 | 0.03979  | -0.02669 | -0.02835 |

|     |     |     |          |          |          |          |          |
|-----|-----|-----|----------|----------|----------|----------|----------|
| 141 | N1  | DYY | 0.00000  | 0.01344  | -0.02460 | -0.01630 | 0.00675  |
| 142 | N1  | DZZ | 0.00000  | 0.14508  | 0.00343  | 0.04399  | -0.01890 |
| 143 | N1  | DXY | 0.00000  | -0.01980 | -0.01701 | 0.02206  | 0.00533  |
| 144 | N1  | DXZ | 0.01472  | 0.00000  | 0.00000  | 0.00000  | 0.00000  |
| 145 | N1  | DYZ | 0.03651  | 0.00000  | 0.00000  | 0.00000  | 0.00000  |
| 146 | H6  | S   | 0.00000  | 0.00307  | -0.01421 | -0.11910 | 0.25773  |
| 147 | H6  | S   | 0.00000  | -0.36641 | -0.27609 | 0.94293  | -1.74895 |
| 148 | H6  | PX  | 0.00000  | -0.01099 | -0.01355 | 0.04506  | -0.10102 |
| 149 | H6  | PY  | 0.00000  | -0.03275 | -0.00063 | 0.01719  | -0.02803 |
| 150 | H6  | PZ  | 0.02315  | 0.00000  | 0.00000  | 0.00000  | 0.00000  |
| 151 | C8  | S   | 0.00000  | -0.01741 | -0.00655 | 0.00975  | 0.00239  |
| 152 | C8  | S   | 0.00000  | -0.61982 | -0.05829 | 0.01649  | -0.04311 |
| 153 | C8  | PX  | 0.00000  | 0.41679  | -0.06480 | 0.22705  | 0.07429  |
| 154 | C8  | PY  | 0.00000  | -0.08129 | 0.09239  | 0.10183  | -0.04054 |
| 155 | C8  | PZ  | -0.39775 | 0.00000  | 0.00000  | 0.00000  | 0.00000  |
| 156 | C8  | S   | 0.00000  | 0.82808  | -0.89763 | -0.02811 | 0.04669  |
| 157 | C8  | PX  | 0.00000  | -0.82734 | 1.00103  | -1.31261 | -0.58011 |
| 158 | C8  | PY  | 0.00000  | -0.93337 | -1.52459 | -0.78680 | 0.33858  |
| 159 | C8  | PZ  | 0.84236  | 0.00000  | 0.00000  | 0.00000  | 0.00000  |
| 160 | C8  | DXX | 0.00000  | -0.05058 | -0.01243 | 0.00327  | 0.01097  |
| 161 | C8  | DYY | 0.00000  | -0.11508 | -0.07989 | 0.01489  | 0.00053  |
| 162 | C8  | DZZ | 0.00000  | 0.01426  | 0.03002  | -0.00670 | -0.00780 |
| 163 | C8  | DXY | 0.00000  | 0.06506  | -0.07396 | 0.02839  | -0.01177 |
| 164 | C8  | DXZ | -0.01327 | 0.00000  | 0.00000  | 0.00000  | 0.00000  |
| 165 | C8  | DYZ | -0.00430 | 0.00000  | 0.00000  | 0.00000  | 0.00000  |
| 166 | H8  | S   | 0.00000  | 0.14150  | -0.11305 | -0.07125 | 0.02550  |
| 167 | H8  | S   | 0.00000  | -0.03840 | 2.01648  | 0.28866  | -0.03398 |
| 168 | H8  | PX  | 0.00000  | 0.02297  | -0.10216 | -0.01605 | 0.00340  |
| 169 | H8  | PY  | 0.00000  | 0.00128  | -0.00089 | 0.02127  | 0.00316  |
| 170 | H8  | PZ  | -0.01513 | 0.00000  | 0.00000  | 0.00000  | 0.00000  |
| 171 | C10 | S   | 0.00000  | 0.01214  | -0.00780 | 0.00094  | -0.00108 |
| 172 | C10 | S   | 0.00000  | -0.31063 | 0.06965  | 0.07535  | 0.02058  |
| 173 | C10 | PX  | 0.00000  | -0.03724 | 0.57430  | -0.58020 | -0.09354 |
| 174 | C10 | PY  | 0.00000  | -0.08205 | 0.07567  | -0.08537 | 0.00643  |
| 175 | C10 | PZ  | 0.04703  | 0.00000  | 0.00000  | 0.00000  | 0.00000  |
| 176 | C10 | S   | 0.00000  | -0.41712 | -1.11317 | -0.45587 | 0.27666  |
| 177 | C10 | PX  | 0.00000  | 0.40253  | -1.63362 | 1.94013  | 0.33411  |
| 178 | C10 | PY  | 0.00000  | 0.02398  | -0.56424 | 0.16725  | 0.17763  |
| 179 | C10 | PZ  | -0.27803 | 0.00000  | 0.00000  | 0.00000  | 0.00000  |
| 180 | C10 | DXX | 0.00000  | 0.01870  | -0.03795 | 0.03882  | -0.00232 |
| 181 | C10 | DYY | 0.00000  | -0.03435 | 0.01310  | -0.03512 | 0.00807  |
| 182 | C10 | DZZ | 0.00000  | -0.00664 | 0.03087  | 0.00388  | -0.00128 |
| 183 | C10 | DXY | 0.00000  | -0.01927 | 0.07426  | -0.06973 | -0.00275 |
| 184 | C10 | DXZ | -0.01220 | 0.00000  | 0.00000  | 0.00000  | 0.00000  |
| 185 | C10 | DYZ | -0.00561 | 0.00000  | 0.00000  | 0.00000  | 0.00000  |
| 186 | H16 | S   | 0.00000  | 0.25316  | -0.13287 | 0.15370  | 0.00266  |
| 187 | H16 | S   | 0.00000  | -0.32481 | 1.12618  | -1.15014 | -0.16444 |
| 188 | H16 | PX  | 0.00000  | 0.02252  | -0.06796 | 0.06196  | 0.00869  |
| 189 | H16 | PY  | 0.00000  | -0.01067 | 0.03120  | -0.02695 | -0.00740 |
| 190 | H16 | PZ  | -0.00925 | 0.00000  | 0.00000  | 0.00000  | 0.00000  |
| 191 | H18 | S   | 0.00000  | 0.01201  | 0.07663  | -0.12122 | -0.00549 |
| 192 | H18 | S   | 0.00000  | 0.25150  | -0.89571 | 1.09647  | 0.17847  |
| 193 | H18 | PX  | 0.00000  | -0.02242 | -0.04171 | 0.04027  | 0.00722  |

|     |     |     |          |          |          |          |          |
|-----|-----|-----|----------|----------|----------|----------|----------|
| 194 | H18 | PY  | 0.00000  | 0.02029  | -0.03224 | 0.05666  | 0.00444  |
| 195 | H18 | PZ  | -0.00128 | 0.00000  | 0.00000  | 0.00000  | 0.00000  |
| 196 | C9  | S   | 0.00000  | 0.00333  | 0.00963  | 0.01478  | 0.03405  |
| 197 | C9  | S   | 0.00000  | -0.02887 | 0.14752  | 0.27062  | 0.14285  |
| 198 | C9  | PX  | 0.00000  | 0.00873  | 0.05535  | 0.11913  | 0.28249  |
| 199 | C9  | PY  | 0.00000  | 0.04174  | -0.03653 | -0.07906 | -0.30126 |
| 200 | C9  | PZ  | -0.21984 | 0.00000  | 0.00000  | 0.00000  | 0.00000  |
| 201 | C9  | S   | 0.00000  | 0.00383  | -0.41942 | -0.71182 | -0.40406 |
| 202 | C9  | PX  | 0.00000  | 0.04803  | -0.07737 | -0.21799 | -0.75477 |
| 203 | C9  | PY  | 0.00000  | -0.08407 | -0.00970 | 0.05053  | 0.62353  |
| 204 | C9  | PZ  | 0.34077  | 0.00000  | 0.00000  | 0.00000  | 0.00000  |
| 205 | C9  | DXX | 0.00000  | 0.00842  | 0.00900  | 0.01505  | 0.00726  |
| 206 | C9  | DYY | 0.00000  | 0.00102  | 0.03709  | 0.05100  | 0.13463  |
| 207 | C9  | DZZ | 0.00000  | -0.00880 | -0.01012 | -0.01185 | -0.05328 |
| 208 | C9  | DXY | 0.00000  | 0.00105  | -0.01823 | -0.01545 | 0.02061  |
| 209 | C9  | DXZ | 0.07300  | 0.00000  | 0.00000  | 0.00000  | 0.00000  |
| 210 | C9  | DYZ | -0.03997 | 0.00000  | 0.00000  | 0.00000  | 0.00000  |
| 211 | H3  | S   | 0.00000  | 0.01570  | 0.14102  | 0.19946  | 0.40569  |
| 212 | H3  | S   | 0.00000  | 0.03447  | -0.02227 | -0.04524 | -0.71288 |
| 213 | H3  | PX  | 0.00000  | -0.00060 | -0.00655 | -0.00402 | 0.02257  |
| 214 | H3  | PY  | 0.00000  | -0.00291 | 0.01040  | 0.01852  | 0.08000  |
| 215 | H3  | PZ  | -0.02139 | 0.00000  | 0.00000  | 0.00000  | 0.00000  |
| 216 | H5  | S   | -0.19797 | -0.00566 | 0.00141  | -0.00477 | -0.03266 |
| 217 | H5  | S   | 0.36973  | -0.02492 | 0.11218  | 0.23761  | 0.56014  |
| 218 | H5  | PX  | -0.02508 | 0.00381  | 0.00374  | 0.00196  | -0.01597 |
| 219 | H5  | PY  | 0.00906  | -0.00353 | -0.01003 | -0.00827 | -0.00741 |
| 220 | H5  | PZ  | 0.02066  | 0.00100  | 0.01157  | 0.01812  | 0.01825  |
| 221 | H7  | S   | 0.19797  | -0.00566 | 0.00141  | -0.00477 | -0.03266 |
| 222 | H7  | S   | -0.36973 | -0.02492 | 0.11218  | 0.23761  | 0.56014  |
| 223 | H7  | PX  | 0.02508  | 0.00381  | 0.00374  | 0.00196  | -0.01597 |
| 224 | H7  | PY  | -0.00906 | -0.00353 | -0.01003 | -0.00827 | -0.00741 |
| 225 | H7  | PZ  | 0.02066  | -0.00100 | -0.01157 | -0.01812 | -0.01825 |

|              |          |          |          |          |          |
|--------------|----------|----------|----------|----------|----------|
| MO:          | 96       | 97       | 98       | 99       | 100      |
| Eigenvalues: | 1.10661  | 1.10759  | 1.11104  | 1.12374  | 1.12979  |
| (ev):        | 30.11254 | 30.13895 | 30.23296 | 30.57848 | 30.74320 |

|    |    | A   | A        | A        | A        | A        |          |
|----|----|-----|----------|----------|----------|----------|----------|
| 1  | H1 | S   | 0.00000  | -0.12310 | 0.02617  | -0.08109 | 0.00000  |
| 2  | H1 | S   | 0.00000  | 0.48044  | -0.04944 | 1.10620  | 0.00000  |
| 3  | H1 | PX  | 0.00000  | -0.03682 | -0.00091 | -0.06812 | 0.00000  |
| 4  | H1 | PY  | 0.00000  | 0.01376  | 0.01604  | -0.02380 | 0.00000  |
| 5  | H1 | PZ  | -0.00294 | 0.00000  | 0.00000  | 0.00000  | 0.00691  |
| 6  | C1 | S   | 0.00000  | -0.00688 | -0.00136 | 0.00052  | 0.00000  |
| 7  | C1 | S   | 0.00000  | 0.18057  | -0.08169 | 0.83559  | 0.00000  |
| 8  | C1 | PX  | 0.00000  | 0.11062  | 0.01919  | 0.24713  | 0.00000  |
| 9  | C1 | PY  | 0.00000  | 0.09633  | -0.10158 | 0.32793  | 0.00000  |
| 10 | C1 | PZ  | 0.26121  | 0.00000  | 0.00000  | 0.00000  | -0.16921 |
| 11 | C1 | S   | 0.00000  | 0.14131  | -0.03635 | -0.76144 | 0.00000  |
| 12 | C1 | PX  | 0.00000  | -0.39458 | -0.04108 | -1.15092 | 0.00000  |
| 13 | C1 | PY  | 0.00000  | -0.36692 | 0.07331  | -0.88008 | 0.00000  |
| 14 | C1 | PZ  | -0.60198 | 0.00000  | 0.00000  | 0.00000  | 0.50524  |
| 15 | C1 | DXX | 0.00000  | -0.05470 | -0.00448 | 0.01079  | 0.00000  |
| 16 | C1 | DYY | 0.00000  | 0.07652  | -0.00759 | 0.07349  | 0.00000  |

|    |    |     |          |          |          |          |          |
|----|----|-----|----------|----------|----------|----------|----------|
| 17 | C1 | DZZ | 0.00000  | 0.00829  | 0.00496  | 0.04204  | 0.00000  |
| 18 | C1 | DXY | 0.00000  | -0.00110 | -0.00019 | -0.02287 | 0.00000  |
| 19 | C1 | DXZ | -0.02607 | 0.00000  | 0.00000  | 0.00000  | -0.00789 |
| 20 | C1 | DYZ | 0.01079  | 0.00000  | 0.00000  | 0.00000  | 0.00745  |
| 21 | C2 | S   | 0.00000  | -0.00367 | 0.00936  | -0.00087 | 0.00000  |
| 22 | C2 | S   | 0.00000  | 0.00427  | -0.23269 | -0.37780 | 0.00000  |
| 23 | C2 | PX  | 0.00000  | -0.23634 | 0.43430  | 0.27037  | 0.00000  |
| 24 | C2 | PY  | 0.00000  | 0.03148  | 0.22316  | 0.19806  | 0.00000  |
| 25 | C2 | PZ  | -0.08248 | 0.00000  | 0.00000  | 0.00000  | -0.03746 |
| 26 | C2 | S   | 0.00000  | 0.42342  | 0.21412  | 0.10231  | 0.00000  |
| 27 | C2 | PX  | 0.00000  | 1.45364  | -1.57363 | -0.41177 | 0.00000  |
| 28 | C2 | PY  | 0.00000  | -0.20443 | -0.31815 | -2.15579 | 0.00000  |
| 29 | C2 | PZ  | 0.19596  | 0.00000  | 0.00000  | 0.00000  | -0.23564 |
| 30 | C2 | DXX | 0.00000  | 0.03515  | 0.07615  | 0.07596  | 0.00000  |
| 31 | C2 | DYY | 0.00000  | 0.00039  | -0.05886 | -0.10486 | 0.00000  |
| 32 | C2 | DZZ | 0.00000  | -0.00907 | -0.04459 | -0.03773 | 0.00000  |
| 33 | C2 | DXY | 0.00000  | 0.01954  | 0.05636  | 0.01331  | 0.00000  |
| 34 | C2 | DXZ | -0.00378 | 0.00000  | 0.00000  | 0.00000  | 0.01890  |
| 35 | C2 | DYZ | 0.01694  | 0.00000  | 0.00000  | 0.00000  | 0.02131  |
| 36 | C3 | S   | 0.00000  | 0.01331  | -0.00525 | -0.00724 | 0.00000  |
| 37 | C3 | S   | 0.00000  | 0.26712  | 0.09902  | 0.01158  | 0.00000  |
| 38 | C3 | PX  | 0.00000  | 0.12081  | -0.04166 | 0.08093  | 0.00000  |
| 39 | C3 | PY  | 0.00000  | 0.14603  | -0.13078 | -0.07326 | 0.00000  |
| 40 | C3 | PZ  | -0.22691 | 0.00000  | 0.00000  | 0.00000  | 0.28134  |
| 41 | C3 | S   | 0.00000  | 0.20817  | -1.13588 | -1.73929 | 0.00000  |
| 42 | C3 | PX  | 0.00000  | -0.45432 | 0.09280  | -0.05805 | 0.00000  |
| 43 | C3 | PY  | 0.00000  | -1.10329 | 0.65167  | 0.54324  | 0.00000  |
| 44 | C3 | PZ  | 0.55827  | 0.00000  | 0.00000  | 0.00000  | -0.77311 |
| 45 | C3 | DXX | 0.00000  | 0.01882  | -0.02461 | -0.06886 | 0.00000  |
| 46 | C3 | DYY | 0.00000  | 0.05903  | -0.01857 | -0.01261 | 0.00000  |
| 47 | C3 | DZZ | 0.00000  | -0.00896 | 0.01873  | 0.02304  | 0.00000  |
| 48 | C3 | DXY | 0.00000  | 0.00980  | 0.03922  | 0.00555  | 0.00000  |
| 49 | C3 | DXZ | -0.01640 | 0.00000  | 0.00000  | 0.00000  | -0.02958 |
| 50 | C3 | DYZ | 0.00395  | 0.00000  | 0.00000  | 0.00000  | 0.00369  |
| 51 | C4 | S   | 0.00000  | -0.00434 | 0.00518  | 0.00888  | 0.00000  |
| 52 | C4 | S   | 0.00000  | -0.28591 | -0.26529 | -0.13134 | 0.00000  |
| 53 | C4 | PX  | 0.00000  | -0.09314 | 0.05617  | -0.02509 | 0.00000  |
| 54 | C4 | PY  | 0.00000  | -0.03449 | -0.13379 | -0.06985 | 0.00000  |
| 55 | C4 | PZ  | -0.03548 | 0.00000  | 0.00000  | 0.00000  | 0.09916  |
| 56 | C4 | S   | 0.00000  | 1.20742  | 0.77795  | 1.62247  | 0.00000  |
| 57 | C4 | PX  | 0.00000  | -0.33350 | -0.25338 | -0.87793 | 0.00000  |
| 58 | C4 | PY  | 0.00000  | -0.23271 | 0.19370  | 1.93784  | 0.00000  |
| 59 | C4 | PZ  | 0.24800  | 0.00000  | 0.00000  | 0.00000  | -0.29024 |
| 60 | C4 | DXX | 0.00000  | -0.00468 | -0.03120 | 0.05925  | 0.00000  |
| 61 | C4 | DYY | 0.00000  | -0.01145 | 0.06622  | 0.04234  | 0.00000  |
| 62 | C4 | DZZ | 0.00000  | -0.01424 | -0.01968 | -0.05136 | 0.00000  |
| 63 | C4 | DXY | 0.00000  | 0.02392  | 0.04915  | -0.02492 | 0.00000  |
| 64 | C4 | DXZ | 0.01505  | 0.00000  | 0.00000  | 0.00000  | 0.00082  |
| 65 | C4 | DYZ | -0.04071 | 0.00000  | 0.00000  | 0.00000  | 0.00493  |
| 66 | C5 | S   | 0.00000  | 0.01821  | 0.02677  | 0.01295  | 0.00000  |
| 67 | C5 | S   | 0.00000  | -0.44611 | -0.09187 | 0.36228  | 0.00000  |
| 68 | C5 | PX  | 0.00000  | 0.41630  | 0.30704  | -0.03581 | 0.00000  |
| 69 | C5 | PY  | 0.00000  | -0.33856 | -0.09491 | 0.35723  | 0.00000  |
| 70 | C5 | PZ  | 0.05867  | 0.00000  | 0.00000  | 0.00000  | 0.01515  |

|     |    |     |          |          |          |          |          |
|-----|----|-----|----------|----------|----------|----------|----------|
| 71  | C5 | S   | 0.00000  | 0.41183  | 0.33283  | 0.06862  | 0.00000  |
| 72  | C5 | PX  | 0.00000  | -1.85431 | -0.51560 | -0.61322 | 0.00000  |
| 73  | C5 | PY  | 0.00000  | 0.94078  | 0.12176  | -2.55360 | 0.00000  |
| 74  | C5 | PZ  | -0.20466 | 0.00000  | 0.00000  | 0.00000  | 0.09982  |
| 75  | C5 | DXX | 0.00000  | 0.01083  | 0.01935  | 0.01205  | 0.00000  |
| 76  | C5 | DYY | 0.00000  | -0.01670 | 0.07655  | 0.06477  | 0.00000  |
| 77  | C5 | DZZ | 0.00000  | -0.04878 | -0.06202 | 0.00834  | 0.00000  |
| 78  | C5 | DXY | 0.00000  | -0.09138 | -0.12005 | 0.01054  | 0.00000  |
| 79  | C5 | DXZ | 0.01055  | 0.00000  | 0.00000  | 0.00000  | 0.01517  |
| 80  | C5 | DYZ | -0.00657 | 0.00000  | 0.00000  | 0.00000  | -0.01928 |
| 81  | C6 | S   | 0.00000  | -0.00580 | -0.00824 | -0.00384 | 0.00000  |
| 82  | C6 | S   | 0.00000  | 0.06274  | -0.07998 | -0.03556 | 0.00000  |
| 83  | C6 | PX  | 0.00000  | 0.01521  | -0.02924 | -0.26281 | 0.00000  |
| 84  | C6 | PY  | 0.00000  | 0.13068  | -0.05521 | -0.19904 | 0.00000  |
| 85  | C6 | PZ  | 0.00165  | 0.00000  | 0.00000  | 0.00000  | -0.34314 |
| 86  | C6 | S   | 0.00000  | -1.33537 | 0.62073  | 0.02159  | 0.00000  |
| 87  | C6 | PX  | 0.00000  | 0.08634  | 0.10393  | 1.92689  | 0.00000  |
| 88  | C6 | PY  | 0.00000  | -0.28912 | 1.05211  | -0.30993 | 0.00000  |
| 89  | C6 | PZ  | -0.05813 | 0.00000  | 0.00000  | 0.00000  | 1.08485  |
| 90  | C6 | DXX | 0.00000  | -0.03009 | 0.01508  | -0.04735 | 0.00000  |
| 91  | C6 | DYY | 0.00000  | -0.00611 | -0.01441 | 0.02500  | 0.00000  |
| 92  | C6 | DZZ | 0.00000  | 0.01325  | -0.00704 | 0.00962  | 0.00000  |
| 93  | C6 | DXY | 0.00000  | 0.02705  | -0.03213 | 0.00798  | 0.00000  |
| 94  | C6 | DXZ | 0.02269  | 0.00000  | 0.00000  | 0.00000  | 0.02420  |
| 95  | C6 | DYZ | -0.03587 | 0.00000  | 0.00000  | 0.00000  | -0.06000 |
| 96  | C7 | S   | 0.00000  | 0.00596  | -0.00362 | 0.01124  | 0.00000  |
| 97  | C7 | S   | 0.00000  | -0.17344 | 0.07891  | -0.29183 | 0.00000  |
| 98  | C7 | PX  | 0.00000  | -0.50565 | 0.20985  | -0.23492 | 0.00000  |
| 99  | C7 | PY  | 0.00000  | -0.11700 | -0.08792 | -0.00217 | 0.00000  |
| 100 | C7 | PZ  | 0.02435  | 0.00000  | 0.00000  | 0.00000  | 0.04102  |
| 101 | C7 | S   | 0.00000  | -1.00091 | 0.62783  | 1.19777  | 0.00000  |
| 102 | C7 | PX  | 0.00000  | 2.39636  | -1.03053 | 0.48004  | 0.00000  |
| 103 | C7 | PY  | 0.00000  | 0.48318  | 0.34285  | 0.44170  | 0.00000  |
| 104 | C7 | PZ  | -0.23068 | 0.00000  | 0.00000  | 0.00000  | -0.02069 |
| 105 | C7 | DXX | 0.00000  | 0.02130  | -0.01657 | 0.05903  | 0.00000  |
| 106 | C7 | DYY | 0.00000  | -0.08268 | 0.05736  | -0.03969 | 0.00000  |
| 107 | C7 | DZZ | 0.00000  | -0.00001 | -0.00380 | -0.03997 | 0.00000  |
| 108 | C7 | DXY | 0.00000  | -0.04523 | -0.01474 | -0.03086 | 0.00000  |
| 109 | C7 | DXZ | -0.00879 | 0.00000  | 0.00000  | 0.00000  | -0.01799 |
| 110 | C7 | DYZ | -0.01491 | 0.00000  | 0.00000  | 0.00000  | -0.04032 |
| 111 | O1 | S   | 0.00000  | 0.00064  | 0.00010  | 0.01148  | 0.00000  |
| 112 | O1 | S   | 0.00000  | 0.02287  | -0.15680 | -0.05236 | 0.00000  |
| 113 | O1 | PX  | 0.00000  | -0.03241 | 0.00498  | 0.02490  | 0.00000  |
| 114 | O1 | PY  | 0.00000  | -0.03556 | -0.24423 | -0.12963 | 0.00000  |
| 115 | O1 | PZ  | -0.09121 | 0.00000  | 0.00000  | 0.00000  | 0.13667  |
| 116 | O1 | S   | 0.00000  | -0.10509 | 0.06502  | -0.91737 | 0.00000  |
| 117 | O1 | PX  | 0.00000  | 0.10794  | -0.02441 | 0.14578  | 0.00000  |
| 118 | O1 | PY  | 0.00000  | 0.03113  | 0.38263  | 0.73669  | 0.00000  |
| 119 | O1 | PZ  | 0.13415  | 0.00000  | 0.00000  | 0.00000  | -0.14026 |
| 120 | O1 | DXX | 0.00000  | 0.00473  | -0.07386 | -0.03915 | 0.00000  |
| 121 | O1 | DYY | 0.00000  | -0.01534 | -0.08508 | -0.08923 | 0.00000  |
| 122 | O1 | DZZ | 0.00000  | 0.03261  | -0.01705 | 0.03496  | 0.00000  |
| 123 | O1 | DXY | 0.00000  | 0.02911  | 0.01296  | 0.00575  | 0.00000  |
| 124 | O1 | DXZ | 0.08596  | 0.00000  | 0.00000  | 0.00000  | -0.02087 |

|     |     |     |          |          |          |          |          |
|-----|-----|-----|----------|----------|----------|----------|----------|
| 125 | O1  | DYZ | 0.04799  | 0.00000  | 0.00000  | 0.00000  | -0.01454 |
| 126 | H4  | S   | 0.00000  | 0.29226  | 0.31306  | -0.01356 | 0.00000  |
| 127 | H4  | S   | 0.00000  | -1.56954 | -0.79139 | 0.88323  | 0.00000  |
| 128 | H4  | PX  | 0.00000  | -0.07144 | -0.03879 | 0.01422  | 0.00000  |
| 129 | H4  | PY  | 0.00000  | 0.06728  | 0.04574  | -0.04316 | 0.00000  |
| 130 | H4  | PZ  | -0.00797 | 0.00000  | 0.00000  | 0.00000  | -0.00452 |
| 131 | N1  | S   | 0.00000  | -0.00885 | -0.00187 | 0.01754  | 0.00000  |
| 132 | N1  | S   | 0.00000  | -0.04551 | -0.06977 | 0.05095  | 0.00000  |
| 133 | N1  | PX  | 0.00000  | 0.00077  | 0.20621  | -0.01683 | 0.00000  |
| 134 | N1  | PY  | 0.00000  | 0.03069  | -0.08081 | 0.04653  | 0.00000  |
| 135 | N1  | PZ  | 0.39910  | 0.00000  | 0.00000  | 0.00000  | 0.85409  |
| 136 | N1  | S   | 0.00000  | 0.22344  | 0.32528  | -0.06610 | 0.00000  |
| 137 | N1  | PX  | 0.00000  | -0.05061 | -0.37009 | -0.20380 | 0.00000  |
| 138 | N1  | PY  | 0.00000  | 0.09484  | 0.39755  | -0.37490 | 0.00000  |
| 139 | N1  | PZ  | -0.53171 | 0.00000  | 0.00000  | 0.00000  | -1.41006 |
| 140 | N1  | DXX | 0.00000  | -0.03827 | -0.03035 | 0.03460  | 0.00000  |
| 141 | N1  | DYY | 0.00000  | -0.00471 | -0.01251 | 0.05812  | 0.00000  |
| 142 | N1  | DZZ | 0.00000  | 0.00841  | -0.01260 | -0.02607 | 0.00000  |
| 143 | N1  | DXY | 0.00000  | -0.03253 | 0.00618  | -0.03514 | 0.00000  |
| 144 | N1  | DXZ | 0.03315  | 0.00000  | 0.00000  | 0.00000  | 0.03053  |
| 145 | N1  | DYZ | 0.01458  | 0.00000  | 0.00000  | 0.00000  | 0.02780  |
| 146 | H6  | S   | 0.00000  | 0.04588  | 0.17155  | 0.29442  | 0.00000  |
| 147 | H6  | S   | 0.00000  | 0.59361  | -1.31207 | -1.01172 | 0.00000  |
| 148 | H6  | PX  | 0.00000  | 0.01904  | -0.07703 | -0.06533 | 0.00000  |
| 149 | H6  | PY  | 0.00000  | 0.01743  | 0.00001  | -0.02046 | 0.00000  |
| 150 | H6  | PZ  | 0.00492  | 0.00000  | 0.00000  | 0.00000  | -0.01641 |
| 151 | C8  | S   | 0.00000  | -0.00703 | 0.00239  | 0.00318  | 0.00000  |
| 152 | C8  | S   | 0.00000  | -0.31267 | -0.06004 | 0.17059  | 0.00000  |
| 153 | C8  | PX  | 0.00000  | -0.14901 | 0.10459  | -0.12418 | 0.00000  |
| 154 | C8  | PY  | 0.00000  | -0.23060 | 0.01525  | 0.02715  | 0.00000  |
| 155 | C8  | PZ  | -0.04838 | 0.00000  | 0.00000  | 0.00000  | -0.16153 |
| 156 | C8  | S   | 0.00000  | 1.43045  | 0.05383  | -0.08289 | 0.00000  |
| 157 | C8  | PX  | 0.00000  | 0.91244  | -0.65861 | 0.46430  | 0.00000  |
| 158 | C8  | PY  | 0.00000  | 1.40360  | -0.17447 | -0.24691 | 0.00000  |
| 159 | C8  | PZ  | 0.23707  | 0.00000  | 0.00000  | 0.00000  | 0.59227  |
| 160 | C8  | DXX | 0.00000  | -0.00516 | 0.04171  | 0.00441  | 0.00000  |
| 161 | C8  | DYY | 0.00000  | -0.02207 | -0.02293 | 0.02499  | 0.00000  |
| 162 | C8  | DZZ | 0.00000  | -0.01093 | -0.01018 | 0.00246  | 0.00000  |
| 163 | C8  | DXY | 0.00000  | 0.00975  | -0.00426 | 0.00654  | 0.00000  |
| 164 | C8  | DXZ | -0.01329 | 0.00000  | 0.00000  | 0.00000  | 0.01639  |
| 165 | C8  | DYZ | 0.02923  | 0.00000  | 0.00000  | 0.00000  | 0.04491  |
| 166 | H8  | S   | 0.00000  | 0.09932  | -0.05044 | 0.17192  | 0.00000  |
| 167 | H8  | S   | 0.00000  | -1.41085 | 0.61681  | -0.75540 | 0.00000  |
| 168 | H8  | PX  | 0.00000  | 0.06508  | -0.02869 | 0.04991  | 0.00000  |
| 169 | H8  | PY  | 0.00000  | -0.01281 | 0.01306  | 0.00240  | 0.00000  |
| 170 | H8  | PZ  | -0.01101 | 0.00000  | 0.00000  | 0.00000  | -0.00538 |
| 171 | C10 | S   | 0.00000  | 0.01145  | -0.00736 | 0.00385  | 0.00000  |
| 172 | C10 | S   | 0.00000  | -0.16354 | 0.00065  | -0.06058 | 0.00000  |
| 173 | C10 | PX  | 0.00000  | 0.49806  | -0.30519 | -0.00499 | 0.00000  |
| 174 | C10 | PY  | 0.00000  | 0.10267  | -0.10071 | -0.04762 | 0.00000  |
| 175 | C10 | PZ  | -0.04429 | 0.00000  | 0.00000  | 0.00000  | -0.04432 |
| 176 | C10 | S   | 0.00000  | 0.67639  | -0.05208 | -0.11576 | 0.00000  |
| 177 | C10 | PX  | 0.00000  | -1.61045 | 0.96337  | -0.03210 | 0.00000  |
| 178 | C10 | PY  | 0.00000  | -0.16464 | 0.33807  | -0.08762 | 0.00000  |

|     |     |     |          |          |          |          |          |
|-----|-----|-----|----------|----------|----------|----------|----------|
| 179 | C10 | PZ  | 0.00923  | 0.00000  | 0.00000  | 0.00000  | -0.08386 |
| 180 | C10 | DXX | 0.00000  | -0.01163 | -0.00840 | -0.00096 | 0.00000  |
| 181 | C10 | DYY | 0.00000  | 0.03615  | -0.01842 | 0.00186  | 0.00000  |
| 182 | C10 | DZZ | 0.00000  | -0.02662 | 0.01607  | -0.01443 | 0.00000  |
| 183 | C10 | DXY | 0.00000  | 0.07423  | -0.03469 | 0.01821  | 0.00000  |
| 184 | C10 | DXZ | 0.01172  | 0.00000  | 0.00000  | 0.00000  | 0.04713  |
| 185 | C10 | DYZ | -0.00757 | 0.00000  | 0.00000  | 0.00000  | 0.00100  |
| 186 | H16 | S   | 0.00000  | -0.05860 | 0.02185  | -0.04270 | 0.00000  |
| 187 | H16 | S   | 0.00000  | 0.86784  | -0.46282 | 0.03970  | 0.00000  |
| 188 | H16 | PX  | 0.00000  | -0.04096 | 0.02717  | 0.00137  | 0.00000  |
| 189 | H16 | PY  | 0.00000  | 0.02645  | -0.01580 | 0.00538  | 0.00000  |
| 190 | H16 | PZ  | 0.00337  | 0.00000  | 0.00000  | 0.00000  | 0.00890  |
| 191 | H18 | S   | 0.00000  | 0.22636  | -0.08757 | 0.06514  | 0.00000  |
| 192 | H18 | S   | 0.00000  | -1.05406 | 0.65494  | -0.11473 | 0.00000  |
| 193 | H18 | PX  | 0.00000  | -0.04747 | 0.02954  | 0.00289  | 0.00000  |
| 194 | H18 | PY  | 0.00000  | -0.05997 | 0.03145  | -0.00793 | 0.00000  |
| 195 | H18 | PZ  | -0.00145 | 0.00000  | 0.00000  | 0.00000  | -0.01404 |
| 196 | C9  | S   | 0.00000  | -0.01379 | -0.03222 | 0.00169  | 0.00000  |
| 197 | C9  | S   | 0.00000  | 0.14500  | -0.11783 | 0.00645  | 0.00000  |
| 198 | C9  | PX  | 0.00000  | 0.03967  | -0.24027 | -0.01292 | 0.00000  |
| 199 | C9  | PY  | 0.00000  | 0.07162  | 0.36112  | 0.01730  | 0.00000  |
| 200 | C9  | PZ  | 0.65349  | 0.00000  | 0.00000  | 0.00000  | -0.23725 |
| 201 | C9  | S   | 0.00000  | -0.25677 | 0.41047  | -0.25680 | 0.00000  |
| 202 | C9  | PX  | 0.00000  | -0.03070 | 0.57413  | 0.30956  | 0.00000  |
| 203 | C9  | PY  | 0.00000  | -0.08792 | -0.60743 | -0.29425 | 0.00000  |
| 204 | C9  | PZ  | -1.24135 | 0.00000  | 0.00000  | 0.00000  | 0.51949  |
| 205 | C9  | DXX | 0.00000  | 0.00856  | 0.00673  | -0.00343 | 0.00000  |
| 206 | C9  | DYY | 0.00000  | -0.05052 | -0.16258 | 0.03810  | 0.00000  |
| 207 | C9  | DZZ | 0.00000  | 0.02434  | 0.07880  | -0.04540 | 0.00000  |
| 208 | C9  | DXY | 0.00000  | 0.01610  | 0.01285  | -0.03949 | 0.00000  |
| 209 | C9  | DXZ | -0.22602 | 0.00000  | 0.00000  | 0.00000  | 0.07476  |
| 210 | C9  | DYZ | 0.08996  | 0.00000  | 0.00000  | 0.00000  | -0.02756 |
| 211 | H3  | S   | 0.00000  | -0.19684 | -0.54593 | 0.24388  | 0.00000  |
| 212 | H3  | S   | 0.00000  | 0.29124  | 0.83694  | 0.02800  | 0.00000  |
| 213 | H3  | PX  | 0.00000  | 0.00589  | -0.00605 | -0.01923 | 0.00000  |
| 214 | H3  | PY  | 0.00000  | -0.02620 | -0.08865 | 0.00281  | 0.00000  |
| 215 | H3  | PZ  | 0.04292  | 0.00000  | 0.00000  | 0.00000  | -0.01032 |
| 216 | H5  | S   | 0.56050  | -0.02906 | 0.05695  | -0.06884 | -0.18971 |
| 217 | H5  | S   | -1.31884 | 0.01506  | -0.53167 | -0.02543 | 0.50794  |
| 218 | H5  | PX  | 0.07106  | -0.00516 | 0.00812  | 0.01675  | -0.02734 |
| 219 | H5  | PY  | -0.03182 | 0.01417  | 0.01972  | -0.02320 | 0.00940  |
| 220 | H5  | PZ  | -0.05455 | 0.00487  | -0.02594 | 0.01866  | 0.01875  |
| 221 | H7  | S   | -0.56050 | -0.02906 | 0.05695  | -0.06884 | 0.18971  |
| 222 | H7  | S   | 1.31884  | 0.01506  | -0.53167 | -0.02543 | -0.50794 |
| 223 | H7  | PX  | -0.07106 | -0.00516 | 0.00812  | 0.01675  | 0.02734  |
| 224 | H7  | PY  | 0.03182  | 0.01417  | 0.01972  | -0.02320 | -0.00940 |
| 225 | H7  | PZ  | -0.05455 | -0.00487 | 0.02594  | -0.01866 | 0.01875  |

|              |          |          |          |          |          |
|--------------|----------|----------|----------|----------|----------|
| MO:          | 101      | 102      | 103      | 104      | 105      |
| Eigenvalues: | 1.14664  | 1.16819  | 1.17462  | 1.17763  | 1.18515  |
| (ev):        | 31.20181 | 31.78807 | 31.96313 | 32.04497 | 32.24946 |

|      |   |          |          |          |          |         |
|------|---|----------|----------|----------|----------|---------|
|      | A | A        | A        | A        | A        |         |
| 1 H1 | S | -0.20003 | -0.10678 | -0.07597 | -0.03766 | 0.20388 |



|    |    |     |          |          |          |          |          |
|----|----|-----|----------|----------|----------|----------|----------|
| 2  | H1 | S   | 0.71477  | 0.08673  | -0.04791 | -0.20105 | -0.76487 |
| 3  | H1 | PX  | -0.06381 | -0.00576 | -0.01092 | 0.00718  | 0.03012  |
| 4  | H1 | PY  | 0.00834  | -0.01348 | -0.00066 | -0.00058 | 0.01067  |
| 5  | H1 | PZ  | 0.00000  | 0.00000  | 0.00000  | 0.00000  | 0.00000  |
| 6  | C1 | S   | -0.00517 | -0.00421 | 0.00882  | 0.00360  | 0.00527  |
| 7  | C1 | S   | 0.23802  | -0.16266 | -0.11574 | -0.02955 | 0.17839  |
| 8  | C1 | PX  | 0.31079  | 0.13350  | 0.09571  | -0.09085 | -0.10577 |
| 9  | C1 | PY  | -0.02818 | -0.13247 | 0.06422  | 0.09048  | -0.26580 |
| 10 | C1 | PZ  | 0.00000  | 0.00000  | 0.00000  | 0.00000  | 0.00000  |
| 11 | C1 | S   | -1.97572 | 0.36233  | 0.24354  | 0.23597  | 0.66077  |
| 12 | C1 | PX  | -0.50863 | -0.40600 | 0.15311  | 0.38846  | 0.13263  |
| 13 | C1 | PY  | -0.07102 | 0.49643  | -0.17097 | -0.42434 | 1.72866  |
| 14 | C1 | PZ  | 0.00000  | 0.00000  | 0.00000  | 0.00000  | 0.00000  |
| 15 | C1 | DXX | -0.03522 | -0.00371 | -0.04389 | -0.01244 | 0.10264  |
| 16 | C1 | DYY | 0.02461  | -0.03018 | 0.02760  | 0.01572  | -0.01403 |
| 17 | C1 | DZZ | 0.02002  | -0.00103 | 0.00462  | -0.00710 | -0.03640 |
| 18 | C1 | DXY | -0.00780 | -0.05125 | -0.00122 | 0.01815  | -0.03325 |
| 19 | C1 | DXZ | 0.00000  | 0.00000  | 0.00000  | 0.00000  | 0.00000  |
| 20 | C1 | DYZ | 0.00000  | 0.00000  | 0.00000  | 0.00000  | 0.00000  |
| 21 | C2 | S   | 0.01003  | -0.01340 | -0.00048 | 0.00017  | 0.00660  |
| 22 | C2 | S   | -0.40351 | -0.43948 | 0.13696  | -0.03262 | 0.24628  |
| 23 | C2 | PX  | 0.24318  | 0.06706  | 0.13840  | 0.05281  | -0.25618 |
| 24 | C2 | PY  | -0.41579 | 0.10610  | 0.05520  | -0.04797 | 0.05644  |
| 25 | C2 | PZ  | 0.00000  | 0.00000  | 0.00000  | 0.00000  | 0.00000  |
| 26 | C2 | S   | 2.13108  | 1.41619  | -0.26466 | -0.03010 | -1.12690 |
| 27 | C2 | PX  | -1.17262 | -0.32245 | -0.53244 | 0.07503  | 0.77765  |
| 28 | C2 | PY  | 2.69939  | -0.38033 | 0.43029  | 0.11130  | -0.72908 |
| 29 | C2 | PZ  | 0.00000  | 0.00000  | 0.00000  | 0.00000  | 0.00000  |
| 30 | C2 | DXX | -0.04808 | -0.05834 | 0.02595  | 0.00361  | 0.02626  |
| 31 | C2 | DYY | 0.04337  | -0.00939 | -0.01056 | -0.00443 | -0.00198 |
| 32 | C2 | DZZ | -0.03181 | -0.00858 | 0.00633  | 0.00256  | 0.00992  |
| 33 | C2 | DXY | 0.03384  | -0.01454 | -0.00637 | 0.02619  | -0.02312 |
| 34 | C2 | DXZ | 0.00000  | 0.00000  | 0.00000  | 0.00000  | 0.00000  |
| 35 | C2 | DYZ | 0.00000  | 0.00000  | 0.00000  | 0.00000  | 0.00000  |
| 36 | C3 | S   | 0.00746  | -0.00663 | 0.00896  | 0.00932  | -0.01646 |
| 37 | C3 | S   | 0.33260  | -0.49182 | 0.38194  | 0.11574  | -0.14504 |
| 38 | C3 | PX  | -0.05598 | -0.23292 | 0.00089  | -0.07874 | 0.14432  |
| 39 | C3 | PY  | -0.11090 | 0.09772  | 0.12692  | 0.14647  | -0.30911 |
| 40 | C3 | PZ  | 0.00000  | 0.00000  | 0.00000  | 0.00000  | 0.00000  |
| 41 | C3 | S   | -0.00417 | 1.91913  | -0.95726 | -0.16243 | 0.37743  |
| 42 | C3 | PX  | 0.08389  | 1.22261  | -0.37803 | 0.00190  | -0.42078 |
| 43 | C3 | PY  | 0.38254  | -0.72858 | 0.05381  | -0.44663 | 1.15124  |
| 44 | C3 | PZ  | 0.00000  | 0.00000  | 0.00000  | 0.00000  | 0.00000  |
| 45 | C3 | DXX | 0.03359  | 0.00696  | 0.04153  | 0.00810  | -0.06133 |
| 46 | C3 | DYY | 0.03777  | -0.01560 | 0.02091  | 0.02493  | -0.00837 |
| 47 | C3 | DZZ | -0.01213 | -0.02157 | 0.00487  | -0.00730 | 0.01960  |
| 48 | C3 | DXY | 0.04566  | -0.03620 | 0.00872  | -0.03989 | 0.08011  |
| 49 | C3 | DXZ | 0.00000  | 0.00000  | 0.00000  | 0.00000  | 0.00000  |
| 50 | C3 | DYZ | 0.00000  | 0.00000  | 0.00000  | 0.00000  | 0.00000  |
| 51 | C4 | S   | 0.01340  | 0.00639  | -0.02221 | -0.00987 | 0.01364  |
| 52 | C4 | S   | 0.55998  | 0.43003  | -0.37387 | -0.16071 | 0.33612  |
| 53 | C4 | PX  | -0.36640 | 0.06716  | 0.08937  | -0.04315 | 0.28486  |
| 54 | C4 | PY  | 0.10435  | -0.08804 | -0.04799 | -0.08676 | 0.13624  |
| 55 | C4 | PZ  | 0.00000  | 0.00000  | 0.00000  | 0.00000  | 0.00000  |

|     |    |     |          |          |          |          |          |
|-----|----|-----|----------|----------|----------|----------|----------|
| 56  | C4 | S   | -3.31086 | -1.67128 | 0.63601  | 0.85785  | -0.60503 |
| 57  | C4 | PX  | 2.86900  | 0.06246  | -0.27039 | -0.02735 | -2.05858 |
| 58  | C4 | PY  | -0.99787 | -0.39285 | -0.03118 | 0.09385  | 0.11786  |
| 59  | C4 | PZ  | 0.00000  | 0.00000  | 0.00000  | 0.00000  | 0.00000  |
| 60  | C4 | DXX | -0.03837 | 0.00701  | -0.03389 | 0.00735  | -0.00176 |
| 61  | C4 | DYY | 0.04362  | 0.03497  | -0.10707 | -0.03353 | 0.07447  |
| 62  | C4 | DZZ | 0.02924  | 0.00960  | 0.03048  | -0.00013 | -0.01699 |
| 63  | C4 | DXY | 0.01620  | 0.04213  | -0.05009 | -0.03124 | 0.02666  |
| 64  | C4 | DXZ | 0.00000  | 0.00000  | 0.00000  | 0.00000  | 0.00000  |
| 65  | C4 | DYZ | 0.00000  | 0.00000  | 0.00000  | 0.00000  | 0.00000  |
| 66  | C5 | S   | -0.02245 | -0.00303 | 0.00132  | 0.00040  | 0.00022  |
| 67  | C5 | S   | -0.08779 | -0.01442 | 0.26844  | 0.12159  | -0.16350 |
| 68  | C5 | PX  | -0.53361 | -0.00820 | -0.24957 | -0.04508 | 0.16941  |
| 69  | C5 | PY  | -0.25572 | -0.09504 | 0.31706  | -0.01248 | 0.04165  |
| 70  | C5 | PZ  | 0.00000  | 0.00000  | 0.00000  | 0.00000  | 0.00000  |
| 71  | C5 | S   | 0.12638  | 0.34511  | -1.28885 | -0.47871 | 0.03664  |
| 72  | C5 | PX  | 3.12324  | 0.24173  | 0.87239  | -0.04849 | -1.29526 |
| 73  | C5 | PY  | 2.38858  | 0.63313  | -0.74333 | -0.17157 | -0.72941 |
| 74  | C5 | PZ  | 0.00000  | 0.00000  | 0.00000  | 0.00000  | 0.00000  |
| 75  | C5 | DXX | 0.07795  | 0.02342  | -0.04619 | -0.00166 | -0.02823 |
| 76  | C5 | DYY | -0.11619 | -0.01614 | 0.01927  | -0.00204 | 0.01967  |
| 77  | C5 | DZZ | 0.01540  | 0.00121  | 0.04160  | 0.01353  | -0.01723 |
| 78  | C5 | DXY | 0.00191  | 0.01464  | 0.03390  | -0.00040 | -0.01996 |
| 79  | C5 | DXZ | 0.00000  | 0.00000  | 0.00000  | 0.00000  | 0.00000  |
| 80  | C5 | DYZ | 0.00000  | 0.00000  | 0.00000  | 0.00000  | 0.00000  |
| 81  | C6 | S   | 0.01434  | 0.00688  | 0.00259  | -0.00850 | 0.00502  |
| 82  | C6 | S   | -0.19986 | 0.18584  | 0.03687  | -0.37448 | 0.13800  |
| 83  | C6 | PX  | 0.13007  | -0.00079 | 0.02739  | -0.00194 | -0.09570 |
| 84  | C6 | PY  | 0.05052  | 0.04822  | -0.02766 | 0.07218  | -0.03917 |
| 85  | C6 | PZ  | 0.00000  | 0.00000  | 0.00000  | 0.00000  | 0.00000  |
| 86  | C6 | S   | 2.44592  | -0.83770 | 0.79772  | 0.75735  | -1.19029 |
| 87  | C6 | PX  | -1.16233 | 0.39477  | -0.46039 | -0.04088 | 0.32666  |
| 88  | C6 | PY  | -0.76368 | 0.65884  | -0.56410 | -0.29969 | 0.26450  |
| 89  | C6 | PZ  | 0.00000  | 0.00000  | 0.00000  | 0.00000  | 0.00000  |
| 90  | C6 | DXX | 0.04021  | 0.01217  | 0.01778  | -0.04381 | 0.00422  |
| 91  | C6 | DYY | 0.04488  | 0.02006  | 0.02550  | -0.01239 | -0.04127 |
| 92  | C6 | DZZ | -0.04330 | -0.00252 | -0.00851 | 0.00041  | 0.01380  |
| 93  | C6 | DXY | -0.01902 | 0.03373  | -0.00708 | 0.03095  | -0.02493 |
| 94  | C6 | DXZ | 0.00000  | 0.00000  | 0.00000  | 0.00000  | 0.00000  |
| 95  | C6 | DYZ | 0.00000  | 0.00000  | 0.00000  | 0.00000  | 0.00000  |
| 96  | C7 | S   | 0.00940  | -0.01745 | -0.00404 | 0.00425  | 0.01578  |
| 97  | C7 | S   | 0.22431  | -0.62707 | 0.20511  | 0.20731  | -0.03401 |
| 98  | C7 | PX  | -0.04728 | -0.15428 | 0.05009  | -0.12853 | 0.09941  |
| 99  | C7 | PY  | -0.22602 | 0.44943  | -0.07338 | 0.08027  | -0.44542 |
| 100 | C7 | PZ  | 0.00000  | 0.00000  | 0.00000  | 0.00000  | 0.00000  |
| 101 | C7 | S   | -1.21570 | 1.28348  | -0.28850 | -0.45449 | -0.13912 |
| 102 | C7 | PX  | 0.63799  | 0.22417  | -0.26508 | 0.59969  | -0.14113 |
| 103 | C7 | PY  | 0.87035  | -2.26304 | 0.65825  | -0.13855 | 1.46064  |
| 104 | C7 | PZ  | 0.00000  | 0.00000  | 0.00000  | 0.00000  | 0.00000  |
| 105 | C7 | DXX | 0.00498  | -0.00213 | -0.00180 | 0.03879  | -0.01930 |
| 106 | C7 | DYY | 0.01714  | -0.09689 | 0.01458  | -0.00935 | 0.03687  |
| 107 | C7 | DZZ | 0.00124  | -0.00603 | 0.00961  | -0.00068 | -0.00515 |
| 108 | C7 | DXY | -0.04715 | 0.09715  | -0.01574 | 0.02069  | -0.06391 |
| 109 | C7 | DXZ | 0.00000  | 0.00000  | 0.00000  | 0.00000  | 0.00000  |

|     |    |     |          |          |          |          |          |
|-----|----|-----|----------|----------|----------|----------|----------|
| 110 | C7 | DYZ | 0.00000  | 0.00000  | 0.00000  | 0.00000  | 0.00000  |
| 111 | O1 | S   | -0.00805 | -0.01061 | -0.00213 | 0.00012  | 0.00301  |
| 112 | O1 | S   | -0.16892 | -0.17014 | 0.27850  | 0.08461  | -0.19641 |
| 113 | O1 | PX  | 0.20919  | 0.04696  | -0.22833 | -0.07138 | 0.02161  |
| 114 | O1 | PY  | -0.11630 | -0.11409 | 0.11984  | 0.05714  | -0.04909 |
| 115 | O1 | PZ  | 0.00000  | 0.00000  | 0.00000  | 0.00000  | 0.00000  |
| 116 | O1 | S   | 0.98819  | 0.80080  | -0.25642 | -0.20035 | 0.41087  |
| 117 | O1 | PX  | -0.58907 | -0.10741 | 0.39592  | 0.14497  | 0.20031  |
| 118 | O1 | PY  | -0.24601 | -0.09421 | -0.20476 | -0.01953 | 0.18589  |
| 119 | O1 | PZ  | 0.00000  | 0.00000  | 0.00000  | 0.00000  | 0.00000  |
| 120 | O1 | DXX | -0.05067 | -0.04089 | 0.10763  | 0.03338  | -0.06025 |
| 121 | O1 | DYY | 0.00201  | -0.03771 | 0.08308  | 0.00317  | -0.02923 |
| 122 | O1 | DZZ | -0.12072 | -0.10013 | 0.08868  | 0.04461  | -0.08757 |
| 123 | O1 | DXY | 0.00029  | -0.01674 | 0.04787  | 0.02606  | -0.02959 |
| 124 | O1 | DXZ | 0.00000  | 0.00000  | 0.00000  | 0.00000  | 0.00000  |
| 125 | O1 | DYZ | 0.00000  | 0.00000  | 0.00000  | 0.00000  | 0.00000  |
| 126 | H4 | S   | -0.08356 | -0.06733 | -0.09411 | 0.00378  | 0.03941  |
| 127 | H4 | S   | 0.28429  | -0.17680 | 1.09115  | 0.16408  | -0.36203 |
| 128 | H4 | PX  | 0.00739  | 0.00269  | 0.04635  | -0.00265 | -0.00521 |
| 129 | H4 | PY  | -0.03811 | 0.00439  | -0.03816 | -0.01229 | 0.02089  |
| 130 | H4 | PZ  | 0.00000  | 0.00000  | 0.00000  | 0.00000  | 0.00000  |
| 131 | N1 | S   | 0.00694  | -0.00940 | 0.01110  | -0.00949 | -0.00052 |
| 132 | N1 | S   | -0.06107 | 0.10825  | -0.07349 | -0.00858 | 0.08266  |
| 133 | N1 | PX  | -0.00161 | -0.01208 | -0.00775 | -0.18097 | 0.15605  |
| 134 | N1 | PY  | 0.13209  | 0.03397  | -0.04997 | 0.03489  | -0.05709 |
| 135 | N1 | PZ  | 0.00000  | 0.00000  | 0.00000  | 0.00000  | 0.00000  |
| 136 | N1 | S   | -0.77712 | 0.29957  | -0.38373 | -0.12056 | 0.15982  |
| 137 | N1 | PX  | 0.09621  | 0.02421  | 0.10865  | 0.42586  | -0.42377 |
| 138 | N1 | PY  | -0.88707 | 0.49606  | -0.42717 | -0.13631 | 0.34839  |
| 139 | N1 | PZ  | 0.00000  | 0.00000  | 0.00000  | 0.00000  | 0.00000  |
| 140 | N1 | DXX | 0.00403  | 0.02726  | -0.00965 | -0.01500 | 0.00250  |
| 141 | N1 | DYY | -0.07636 | 0.03173  | -0.02322 | -0.02890 | 0.05091  |
| 142 | N1 | DZZ | 0.00528  | -0.01196 | 0.00131  | 0.04060  | -0.00545 |
| 143 | N1 | DXY | -0.01663 | 0.03105  | -0.00978 | -0.01820 | -0.01485 |
| 144 | N1 | DXZ | 0.00000  | 0.00000  | 0.00000  | 0.00000  | 0.00000  |
| 145 | N1 | DYZ | 0.00000  | 0.00000  | 0.00000  | 0.00000  | 0.00000  |
| 146 | H6 | S   | 0.05383  | -0.13782 | 0.07007  | 0.09683  | -0.02689 |
| 147 | H6 | S   | -0.45080 | -0.39645 | -0.22824 | -0.00484 | 0.49298  |
| 148 | H6 | PX  | -0.03034 | -0.01162 | -0.01878 | -0.00721 | 0.03164  |
| 149 | H6 | PY  | -0.02271 | -0.01437 | 0.00146  | -0.01346 | 0.02268  |
| 150 | H6 | PZ  | 0.00000  | 0.00000  | 0.00000  | 0.00000  | 0.00000  |
| 151 | C8 | S   | -0.00600 | 0.01925  | -0.00445 | 0.00047  | -0.00974 |
| 152 | C8 | S   | -0.04913 | 0.36273  | -0.19416 | 0.18178  | -0.16815 |
| 153 | C8 | PX  | -0.26067 | 0.34130  | -0.13295 | 0.01867  | -0.05912 |
| 154 | C8 | PY  | -0.12096 | 0.23742  | -0.03568 | -0.11802 | -0.13126 |
| 155 | C8 | PZ  | 0.00000  | 0.00000  | 0.00000  | 0.00000  | 0.00000  |
| 156 | C8 | S   | 0.40313  | -1.38695 | 0.49358  | -0.46983 | 0.87188  |
| 157 | C8 | PX  | 1.02411  | -1.46553 | 0.55939  | 0.17345  | 0.27864  |
| 158 | C8 | PY  | 1.37325  | -1.15792 | 0.11697  | 0.15788  | 0.84439  |
| 159 | C8 | PZ  | 0.00000  | 0.00000  | 0.00000  | 0.00000  | 0.00000  |
| 160 | C8 | DXX | 0.00762  | -0.02302 | -0.01013 | -0.02792 | 0.06430  |
| 161 | C8 | DYY | 0.00616  | 0.06587  | -0.01005 | -0.00308 | -0.05683 |
| 162 | C8 | DZZ | -0.01090 | 0.00481  | -0.00527 | 0.01636  | -0.00512 |
| 163 | C8 | DXY | 0.02515  | -0.06768 | 0.01432  | 0.02978  | 0.03386  |

|     |     |     |          |          |          |          |          |
|-----|-----|-----|----------|----------|----------|----------|----------|
| 164 | C8  | DXZ | 0.00000  | 0.00000  | 0.00000  | 0.00000  | 0.00000  |
| 165 | C8  | DYZ | 0.00000  | 0.00000  | 0.00000  | 0.00000  | 0.00000  |
| 166 | H8  | S   | -0.09255 | 0.03154  | -0.02469 | 0.01918  | 0.03142  |
| 167 | H8  | S   | -0.09934 | -0.59593 | 0.31407  | -0.39009 | 0.20660  |
| 168 | H8  | PX  | -0.00910 | 0.04253  | -0.01394 | 0.00620  | -0.00813 |
| 169 | H8  | PY  | 0.00406  | -0.00823 | 0.00511  | -0.00798 | 0.02037  |
| 170 | H8  | PZ  | 0.00000  | 0.00000  | 0.00000  | 0.00000  | 0.00000  |
| 171 | C10 | S   | -0.00556 | 0.00740  | 0.00715  | -0.01893 | -0.01301 |
| 172 | C10 | S   | -0.05148 | 0.19632  | -0.33812 | 0.99306  | -0.03232 |
| 173 | C10 | PX  | 0.04867  | 0.07408  | -0.05942 | 0.16977  | -0.11219 |
| 174 | C10 | PY  | -0.00343 | 0.18581  | 0.14558  | -0.50497 | -0.25379 |
| 175 | C10 | PZ  | 0.00000  | 0.00000  | 0.00000  | 0.00000  | 0.00000  |
| 176 | C10 | S   | 0.80049  | -0.42904 | 0.60750  | -2.06809 | 0.18155  |
| 177 | C10 | PX  | -0.42862 | 0.01508  | 0.11369  | -0.31916 | 0.14401  |
| 178 | C10 | PY  | 0.27929  | -0.54960 | -0.27087 | 0.87379  | 0.74511  |
| 179 | C10 | PZ  | 0.00000  | 0.00000  | 0.00000  | 0.00000  | 0.00000  |
| 180 | C10 | DXX | -0.02112 | 0.05039  | 0.04248  | -0.14717 | -0.06652 |
| 181 | C10 | DYY | 0.00741  | 0.00742  | -0.03067 | 0.10789  | -0.00411 |
| 182 | C10 | DZZ | 0.00526  | -0.02615 | -0.03945 | 0.12961  | 0.04740  |
| 183 | C10 | DXY | -0.00121 | 0.00623  | 0.03136  | -0.05484 | -0.03679 |
| 184 | C10 | DXZ | 0.00000  | 0.00000  | 0.00000  | 0.00000  | 0.00000  |
| 185 | C10 | DYZ | 0.00000  | 0.00000  | 0.00000  | 0.00000  | 0.00000  |
| 186 | H16 | S   | -0.12297 | 0.16498  | 0.09960  | -0.54482 | -0.10191 |
| 187 | H16 | S   | 0.25178  | -0.17985 | -0.37392 | 1.31945  | 0.19548  |
| 188 | H16 | PX  | -0.00667 | -0.00559 | 0.03711  | -0.11270 | -0.00428 |
| 189 | H16 | PY  | 0.01229  | -0.02209 | 0.01251  | 0.00644  | -0.00422 |
| 190 | H16 | PZ  | 0.00000  | 0.00000  | 0.00000  | 0.00000  | 0.00000  |
| 191 | H18 | S   | 0.02860  | -0.08736 | 0.24363  | -0.47483 | -0.14578 |
| 192 | H18 | S   | -0.15377 | -0.21689 | -0.39165 | 1.15214  | 0.57292  |
| 193 | H18 | PX  | 0.00672  | -0.02756 | -0.02522 | 0.09174  | 0.03810  |
| 194 | H18 | PY  | -0.01658 | 0.01203  | -0.02070 | 0.03124  | 0.01759  |
| 195 | H18 | PZ  | 0.00000  | 0.00000  | 0.00000  | 0.00000  | 0.00000  |
| 196 | C9  | S   | -0.01236 | -0.02849 | 0.00799  | 0.00547  | -0.03432 |
| 197 | C9  | S   | -0.06911 | 0.57228  | 1.25476  | 0.40205  | 0.51909  |
| 198 | C9  | PX  | 0.07609  | 0.16679  | 0.17055  | 0.03054  | 0.29920  |
| 199 | C9  | PY  | -0.02740 | 0.10872  | 0.23477  | 0.13860  | -0.05993 |
| 200 | C9  | PZ  | 0.00000  | 0.00000  | 0.00000  | 0.00000  | 0.00000  |
| 201 | C9  | S   | 0.47601  | -1.17172 | -3.04260 | -1.04100 | -1.25220 |
| 202 | C9  | PX  | -0.21715 | -0.24607 | -0.36210 | -0.03775 | -0.32452 |
| 203 | C9  | PY  | 0.24417  | -0.17398 | -0.32523 | -0.24162 | -0.06693 |
| 204 | C9  | PZ  | 0.00000  | 0.00000  | 0.00000  | 0.00000  | 0.00000  |
| 205 | C9  | DXX | 0.03379  | 0.04808  | 0.05331  | 0.01569  | 0.04232  |
| 206 | C9  | DYY | -0.00624 | 0.00176  | -0.02027 | -0.01486 | 0.07522  |
| 207 | C9  | DZZ | -0.04445 | -0.04389 | 0.08540  | 0.03831  | -0.14096 |
| 208 | C9  | DXY | 0.02616  | 0.03219  | 0.05260  | 0.02504  | -0.00925 |
| 209 | C9  | DXZ | 0.00000  | 0.00000  | 0.00000  | 0.00000  | 0.00000  |
| 210 | C9  | DYZ | 0.00000  | 0.00000  | 0.00000  | 0.00000  | 0.00000  |
| 211 | H3  | S   | -0.18089 | -0.27685 | -0.30122 | -0.10247 | 0.01494  |
| 212 | H3  | S   | -0.20351 | 0.47793  | 1.15773  | 0.49988  | 0.08984  |
| 213 | H3  | PX  | -0.00377 | 0.00831  | 0.04010  | 0.01852  | -0.00587 |
| 214 | H3  | PY  | -0.01167 | -0.05317 | -0.06557 | -0.02706 | -0.01898 |
| 215 | H3  | PZ  | 0.00000  | 0.00000  | 0.00000  | 0.00000  | 0.00000  |
| 216 | H5  | S   | -0.11222 | -0.27764 | -0.07562 | -0.00761 | -0.43512 |
| 217 | H5  | S   | 0.02722  | 0.48511  | 0.75554  | 0.20346  | 0.76038  |

|     |    |    |          |          |          |          |          |
|-----|----|----|----------|----------|----------|----------|----------|
| 218 | H5 | PX | 0.00496  | -0.00882 | -0.03493 | -0.01149 | -0.00289 |
| 219 | H5 | PY | 0.00447  | 0.01474  | 0.03049  | 0.01029  | -0.00099 |
| 220 | H5 | PZ | 0.01744  | 0.04893  | 0.02318  | 0.00138  | 0.08127  |
| 221 | H7 | S  | -0.11222 | -0.27764 | -0.07562 | -0.00761 | -0.43512 |
| 222 | H7 | S  | 0.02722  | 0.48511  | 0.75554  | 0.20346  | 0.76038  |
| 223 | H7 | PX | 0.00496  | -0.00882 | -0.03493 | -0.01149 | -0.00289 |
| 224 | H7 | PY | 0.00447  | 0.01474  | 0.03049  | 0.01029  | -0.00099 |
| 225 | H7 | PZ | -0.01744 | -0.04893 | -0.02318 | -0.00138 | -0.08127 |

|              |          |          |          |          |          |
|--------------|----------|----------|----------|----------|----------|
| M0:          | 106      | 107      | 108      | 109      | 110      |
| Eigenvalues: | 1.21214  | 1.24414  | 1.26238  | 1.28992  | 1.31200  |
| (ev):        | 32.98403 | 33.85491 | 34.35121 | 35.10064 | 35.70137 |

|    |    |     |          |          |          |          |          |
|----|----|-----|----------|----------|----------|----------|----------|
|    |    |     | A        | A        | A        | A        | A        |
| 1  | H1 | S   | -0.21684 | 0.10511  | 0.14845  | -0.02904 | 0.00000  |
| 2  | H1 | S   | 0.92582  | 0.69236  | 0.51114  | 0.70170  | 0.00000  |
| 3  | H1 | PX  | -0.04564 | -0.03309 | -0.00218 | -0.01319 | 0.00000  |
| 4  | H1 | PY  | 0.00637  | 0.00951  | 0.02277  | -0.01011 | 0.00000  |
| 5  | H1 | PZ  | 0.00000  | 0.00000  | 0.00000  | 0.00000  | -0.03548 |
| 6  | C1 | S   | 0.00014  | -0.00323 | -0.00353 | -0.00175 | 0.00000  |
| 7  | C1 | S   | 0.14693  | -0.13303 | 0.57927  | 0.17415  | 0.00000  |
| 8  | C1 | PX  | 0.24925  | 0.37690  | -0.01844 | 0.21698  | 0.00000  |
| 9  | C1 | PY  | -0.07951 | -0.06265 | -0.33775 | -0.30189 | 0.00000  |
| 10 | C1 | PZ  | 0.00000  | 0.00000  | 0.00000  | 0.00000  | -0.01390 |
| 11 | C1 | S   | -0.87398 | 0.36068  | -0.44056 | -0.30671 | 0.00000  |
| 12 | C1 | PX  | -0.77387 | -1.07033 | -1.28753 | -0.71555 | 0.00000  |
| 13 | C1 | PY  | -0.03738 | 0.29432  | 1.66558  | 0.20174  | 0.00000  |
| 14 | C1 | PZ  | 0.00000  | 0.00000  | 0.00000  | 0.00000  | -0.21785 |
| 15 | C1 | DXX | -0.05619 | -0.04457 | 0.07925  | -0.00427 | 0.00000  |
| 16 | C1 | DYY | 0.05271  | -0.01272 | 0.01317  | 0.02305  | 0.00000  |
| 17 | C1 | DZZ | 0.02848  | 0.03999  | 0.01289  | 0.02255  | 0.00000  |
| 18 | C1 | DXY | -0.02345 | -0.02680 | 0.01112  | -0.06611 | 0.00000  |
| 19 | C1 | DXZ | 0.00000  | 0.00000  | 0.00000  | 0.00000  | -0.08396 |
| 20 | C1 | DYZ | 0.00000  | 0.00000  | 0.00000  | 0.00000  | 0.00360  |
| 21 | C2 | S   | -0.02085 | 0.00693  | 0.00160  | 0.01114  | 0.00000  |
| 22 | C2 | S   | -0.35139 | 0.31731  | 0.05248  | 0.02432  | 0.00000  |
| 23 | C2 | PX  | -0.15789 | 0.26498  | -0.10126 | 0.02719  | 0.00000  |
| 24 | C2 | PY  | 0.35363  | -0.06370 | 0.06379  | -0.12691 | 0.00000  |
| 25 | C2 | PZ  | 0.00000  | 0.00000  | 0.00000  | 0.00000  | 0.04122  |
| 26 | C2 | S   | 1.55560  | -0.52828 | -0.36334 | 0.09000  | 0.00000  |
| 27 | C2 | PX  | 0.35162  | -1.36803 | 0.82629  | -0.06519 | 0.00000  |
| 28 | C2 | PY  | -1.81122 | 2.08660  | -0.25918 | 0.45881  | 0.00000  |
| 29 | C2 | PZ  | 0.00000  | 0.00000  | 0.00000  | 0.00000  | -0.01100 |
| 30 | C2 | DXX | -0.03936 | 0.03295  | 0.04439  | 0.00069  | 0.00000  |
| 31 | C2 | DYY | -0.03216 | 0.04995  | -0.05189 | 0.02117  | 0.00000  |
| 32 | C2 | DZZ | 0.02102  | -0.03604 | 0.02401  | -0.01806 | 0.00000  |
| 33 | C2 | DXY | -0.13341 | 0.03193  | -0.00570 | 0.02561  | 0.00000  |
| 34 | C2 | DXZ | 0.00000  | 0.00000  | 0.00000  | 0.00000  | 0.03471  |
| 35 | C2 | DYZ | 0.00000  | 0.00000  | 0.00000  | 0.00000  | 0.00073  |
| 36 | C3 | S   | -0.00013 | -0.00937 | -0.01052 | -0.02177 | 0.00000  |
| 37 | C3 | S   | 0.15695  | -0.16640 | 0.22837  | -0.67691 | 0.00000  |
| 38 | C3 | PX  | 0.07443  | 0.23517  | -0.28117 | 0.22769  | 0.00000  |
| 39 | C3 | PY  | 0.01834  | -0.01184 | -0.32622 | -0.09252 | 0.00000  |
| 40 | C3 | PZ  | 0.00000  | 0.00000  | 0.00000  | 0.00000  | 0.06487  |

|    |    |     |          |          |          |          |          |
|----|----|-----|----------|----------|----------|----------|----------|
| 41 | C3 | S   | -1.14572 | 2.07966  | 0.68063  | 1.10364  | 0.00000  |
| 42 | C3 | PX  | 0.34925  | -1.28077 | 1.57095  | -1.37294 | 0.00000  |
| 43 | C3 | PY  | 0.07034  | -0.84208 | 0.54933  | 0.00485  | 0.00000  |
| 44 | C3 | PZ  | 0.00000  | 0.00000  | 0.00000  | 0.00000  | -0.04037 |
| 45 | C3 | DXX | -0.00420 | 0.04583  | -0.00273 | -0.10594 | 0.00000  |
| 46 | C3 | DYY | 0.00950  | -0.02016 | 0.05300  | -0.06192 | 0.00000  |
| 47 | C3 | DZZ | 0.01496  | -0.00625 | 0.00203  | 0.03893  | 0.00000  |
| 48 | C3 | DXY | 0.06571  | 0.08598  | 0.03538  | 0.04433  | 0.00000  |
| 49 | C3 | DXZ | 0.00000  | 0.00000  | 0.00000  | 0.00000  | -0.02804 |
| 50 | C3 | DYZ | 0.00000  | 0.00000  | 0.00000  | 0.00000  | 0.00753  |
| 51 | C4 | S   | 0.00976  | -0.01933 | -0.00720 | -0.00344 | 0.00000  |
| 52 | C4 | S   | 0.12006  | -0.44846 | -0.18026 | 0.29140  | 0.00000  |
| 53 | C4 | PX  | -0.19026 | 0.27922  | -0.00718 | -0.01154 | 0.00000  |
| 54 | C4 | PY  | -0.02341 | 0.19748  | 0.06910  | -0.24838 | 0.00000  |
| 55 | C4 | PZ  | 0.00000  | 0.00000  | 0.00000  | 0.00000  | -0.16381 |
| 56 | C4 | S   | -1.57462 | 0.23481  | -0.74958 | -1.50099 | 0.00000  |
| 57 | C4 | PX  | 1.35779  | -0.83939 | -1.27590 | 0.43759  | 0.00000  |
| 58 | C4 | PY  | -0.10404 | -0.41852 | 0.58809  | 0.32299  | 0.00000  |
| 59 | C4 | PZ  | 0.00000  | 0.00000  | 0.00000  | 0.00000  | 0.69294  |
| 60 | C4 | DXX | -0.01790 | -0.06747 | -0.07124 | 0.03832  | 0.00000  |
| 61 | C4 | DYY | -0.03703 | -0.04126 | -0.03021 | -0.09389 | 0.00000  |
| 62 | C4 | DZZ | 0.02894  | 0.02705  | 0.03266  | 0.02599  | 0.00000  |
| 63 | C4 | DXY | -0.00380 | 0.05902  | -0.02974 | 0.03162  | 0.00000  |
| 64 | C4 | DXZ | 0.00000  | 0.00000  | 0.00000  | 0.00000  | 0.00700  |
| 65 | C4 | DYZ | 0.00000  | 0.00000  | 0.00000  | 0.00000  | -0.06147 |
| 66 | C5 | S   | -0.01406 | 0.02573  | -0.01000 | -0.00792 | 0.00000  |
| 67 | C5 | S   | -0.53880 | 0.62714  | -0.30958 | 0.18540  | 0.00000  |
| 68 | C5 | PX  | -0.15006 | -0.00840 | -0.06003 | 0.08041  | 0.00000  |
| 69 | C5 | PY  | 0.22151  | 0.11783  | 0.15149  | -0.23924 | 0.00000  |
| 70 | C5 | PZ  | 0.00000  | 0.00000  | 0.00000  | 0.00000  | -0.06600 |
| 71 | C5 | S   | 2.54324  | -3.06001 | 0.05453  | 0.22546  | 0.00000  |
| 72 | C5 | PX  | 0.80489  | 0.56768  | -0.09964 | 0.03376  | 0.00000  |
| 73 | C5 | PY  | -0.18922 | 0.50219  | -1.04922 | 0.87647  | 0.00000  |
| 74 | C5 | PZ  | 0.00000  | 0.00000  | 0.00000  | 0.00000  | -0.07711 |
| 75 | C5 | DXX | -0.03524 | 0.00330  | -0.06985 | 0.05628  | 0.00000  |
| 76 | C5 | DYY | -0.04361 | 0.07013  | -0.01293 | -0.01525 | 0.00000  |
| 77 | C5 | DZZ | 0.01826  | -0.00066 | 0.02794  | -0.00231 | 0.00000  |
| 78 | C5 | DXY | 0.10458  | -0.06102 | -0.01080 | 0.03842  | 0.00000  |
| 79 | C5 | DXZ | 0.00000  | 0.00000  | 0.00000  | 0.00000  | 0.05756  |
| 80 | C5 | DYZ | 0.00000  | 0.00000  | 0.00000  | 0.00000  | -0.05389 |
| 81 | C6 | S   | 0.02446  | 0.00443  | -0.00344 | 0.00929  | 0.00000  |
| 82 | C6 | S   | 0.87775  | 0.27574  | -0.39825 | -0.24555 | 0.00000  |
| 83 | C6 | PX  | -0.31966 | 0.49141  | -0.17371 | 0.10802  | 0.00000  |
| 84 | C6 | PY  | 0.06245  | 0.07181  | 0.24238  | 0.08697  | 0.00000  |
| 85 | C6 | PZ  | 0.00000  | 0.00000  | 0.00000  | 0.00000  | 0.06706  |
| 86 | C6 | S   | -3.18225 | -0.44922 | 1.99264  | 0.27736  | 0.00000  |
| 87 | C6 | PX  | 1.91084  | -3.11440 | 0.79990  | -1.00934 | 0.00000  |
| 88 | C6 | PY  | 0.24671  | 0.28706  | -1.69868 | -0.57133 | 0.00000  |
| 89 | C6 | PZ  | 0.00000  | 0.00000  | 0.00000  | 0.00000  | -0.16109 |
| 90 | C6 | DXX | 0.06563  | 0.06516  | 0.01234  | -0.10385 | 0.00000  |
| 91 | C6 | DYY | 0.00035  | -0.00958 | 0.01212  | 0.06077  | 0.00000  |
| 92 | C6 | DZZ | 0.02516  | -0.01305 | -0.01937 | 0.00219  | 0.00000  |
| 93 | C6 | DXY | 0.00626  | -0.07061 | 0.05334  | -0.02431 | 0.00000  |
| 94 | C6 | DXZ | 0.00000  | 0.00000  | 0.00000  | 0.00000  | 0.00344  |

|     |    |     |          |          |          |          |          |
|-----|----|-----|----------|----------|----------|----------|----------|
| 95  | C6 | DYZ | 0.00000  | 0.00000  | 0.00000  | 0.00000  | 0.02578  |
| 96  | C7 | S   | -0.00066 | -0.01154 | 0.01902  | -0.00120 | 0.00000  |
| 97  | C7 | S   | -0.35655 | -0.59170 | -0.42509 | -0.15167 | 0.00000  |
| 98  | C7 | PX  | 0.11873  | -0.23889 | 0.11479  | -0.06216 | 0.00000  |
| 99  | C7 | PY  | -0.15885 | -0.13028 | -0.15763 | -0.10909 | 0.00000  |
| 100 | C7 | PZ  | 0.00000  | 0.00000  | 0.00000  | 0.00000  | -0.05110 |
| 101 | C7 | S   | 0.66998  | 0.80359  | 0.20595  | 0.29866  | 0.00000  |
| 102 | C7 | PX  | -0.40449 | 1.17914  | 0.50624  | -0.04455 | 0.00000  |
| 103 | C7 | PY  | 0.27831  | 0.34328  | -0.29365 | 1.08222  | 0.00000  |
| 104 | C7 | PZ  | 0.00000  | 0.00000  | 0.00000  | 0.00000  | 0.12496  |
| 105 | C7 | DXX | 0.00041  | -0.04629 | -0.06840 | 0.01228  | 0.00000  |
| 106 | C7 | DYY | -0.05436 | -0.01509 | 0.02018  | -0.00258 | 0.00000  |
| 107 | C7 | DZZ | 0.00264  | -0.01394 | -0.02453 | -0.00177 | 0.00000  |
| 108 | C7 | DXY | -0.03772 | 0.00323  | 0.01843  | -0.01125 | 0.00000  |
| 109 | C7 | DXZ | 0.00000  | 0.00000  | 0.00000  | 0.00000  | 0.01754  |
| 110 | C7 | DYZ | 0.00000  | 0.00000  | 0.00000  | 0.00000  | 0.00090  |
| 111 | O1 | S   | -0.00272 | -0.00063 | 0.00932  | -0.00154 | 0.00000  |
| 112 | O1 | S   | 0.18752  | 0.06420  | 0.17595  | 0.07162  | 0.00000  |
| 113 | O1 | PX  | -0.08752 | 0.02307  | -0.17924 | -0.11557 | 0.00000  |
| 114 | O1 | PY  | 0.02853  | -0.06486 | 0.09293  | 0.32979  | 0.00000  |
| 115 | O1 | PZ  | 0.00000  | 0.00000  | 0.00000  | 0.00000  | 0.89368  |
| 116 | O1 | S   | -0.10384 | 0.03755  | -0.55689 | -0.06412 | 0.00000  |
| 117 | O1 | PX  | -0.13813 | 0.08208  | 0.38265  | 0.04772  | 0.00000  |
| 118 | O1 | PY  | -0.34777 | 0.03851  | -0.09649 | -0.71209 | 0.00000  |
| 119 | O1 | PZ  | 0.00000  | 0.00000  | 0.00000  | 0.00000  | -1.30584 |
| 120 | O1 | DXX | 0.05940  | 0.01518  | 0.02244  | 0.06313  | 0.00000  |
| 121 | O1 | DYY | 0.08882  | 0.03872  | 0.07831  | 0.00208  | 0.00000  |
| 122 | O1 | DZZ | 0.03487  | 0.00626  | 0.10047  | 0.04051  | 0.00000  |
| 123 | O1 | DXY | 0.01417  | -0.02438 | 0.02176  | -0.00398 | 0.00000  |
| 124 | O1 | DXZ | 0.00000  | 0.00000  | 0.00000  | 0.00000  | 0.02743  |
| 125 | O1 | DYZ | 0.00000  | 0.00000  | 0.00000  | 0.00000  | 0.01129  |
| 126 | H4 | S   | -0.20388 | 0.08075  | 0.12908  | -0.21431 | 0.00000  |
| 127 | H4 | S   | 0.37254  | 0.36507  | 0.31973  | -0.23741 | 0.00000  |
| 128 | H4 | PX  | 0.02849  | 0.03560  | 0.00194  | -0.00954 | 0.00000  |
| 129 | H4 | PY  | -0.00097 | -0.00161 | 0.00118  | 0.00052  | 0.00000  |
| 130 | H4 | PZ  | 0.00000  | 0.00000  | 0.00000  | 0.00000  | -0.03337 |
| 131 | N1 | S   | 0.00462  | 0.00087  | -0.00902 | -0.00385 | 0.00000  |
| 132 | N1 | S   | 0.18821  | -0.01975 | -0.05145 | 0.27352  | 0.00000  |
| 133 | N1 | PX  | 0.10133  | 0.05949  | -0.13284 | 0.02056  | 0.00000  |
| 134 | N1 | PY  | -0.20812 | -0.22705 | 0.14274  | 0.28361  | 0.00000  |
| 135 | N1 | PZ  | 0.00000  | 0.00000  | 0.00000  | 0.00000  | -0.08362 |
| 136 | N1 | S   | 0.03652  | -0.09087 | -0.39746 | 0.01071  | 0.00000  |
| 137 | N1 | PX  | -0.79117 | 0.28853  | 0.60960  | 0.50981  | 0.00000  |
| 138 | N1 | PY  | 0.95984  | 0.43751  | -0.78939 | -0.94533 | 0.00000  |
| 139 | N1 | PZ  | 0.00000  | 0.00000  | 0.00000  | 0.00000  | 0.18710  |
| 140 | N1 | DXX | 0.01205  | 0.01095  | 0.02856  | 0.10460  | 0.00000  |
| 141 | N1 | DYY | 0.11397  | 0.00096  | -0.10642 | 0.02044  | 0.00000  |
| 142 | N1 | DZZ | -0.00600 | -0.00726 | 0.02334  | -0.00252 | 0.00000  |
| 143 | N1 | DXY | 0.01198  | 0.02598  | -0.05041 | -0.02137 | 0.00000  |
| 144 | N1 | DXZ | 0.00000  | 0.00000  | 0.00000  | 0.00000  | -0.00884 |
| 145 | N1 | DYZ | 0.00000  | 0.00000  | 0.00000  | 0.00000  | -0.01394 |
| 146 | H6 | S   | -0.22127 | -0.13569 | 0.23004  | -0.04675 | 0.00000  |
| 147 | H6 | S   | -0.10305 | -0.36045 | 0.35207  | 0.02711  | 0.00000  |
| 148 | H6 | PX  | 0.00374  | -0.01370 | -0.00852 | 0.01046  | 0.00000  |

|     |     |     |          |          |          |          |          |
|-----|-----|-----|----------|----------|----------|----------|----------|
| 149 | H6  | PY  | 0.01106  | 0.01448  | 0.01363  | -0.02725 | 0.00000  |
| 150 | H6  | PZ  | 0.00000  | 0.00000  | 0.00000  | 0.00000  | -0.01043 |
| 151 | C8  | S   | -0.00876 | 0.00163  | 0.01724  | 0.00824  | 0.00000  |
| 152 | C8  | S   | -0.39288 | 0.03776  | 0.37415  | 0.52273  | 0.00000  |
| 153 | C8  | PX  | 0.11474  | 0.09484  | 0.00837  | -0.08659 | 0.00000  |
| 154 | C8  | PY  | -0.10454 | 0.01533  | 0.34543  | -0.09524 | 0.00000  |
| 155 | C8  | PZ  | 0.00000  | 0.00000  | 0.00000  | 0.00000  | 0.02018  |
| 156 | C8  | S   | 1.31443  | 0.05389  | -0.77535 | -1.73110 | 0.00000  |
| 157 | C8  | PX  | -0.78614 | -0.24986 | 0.90102  | 1.32473  | 0.00000  |
| 158 | C8  | PY  | -0.11046 | 0.74193  | -1.01047 | 0.27627  | 0.00000  |
| 159 | C8  | PZ  | 0.00000  | 0.00000  | 0.00000  | 0.00000  | -0.10435 |
| 160 | C8  | DXX | -0.00308 | 0.04237  | 0.00866  | 0.05745  | 0.00000  |
| 161 | C8  | DYY | -0.04885 | 0.00022  | 0.06034  | -0.00940 | 0.00000  |
| 162 | C8  | DZZ | 0.00690  | -0.01054 | -0.02498 | 0.01696  | 0.00000  |
| 163 | C8  | DXY | -0.02782 | 0.00635  | -0.00176 | 0.04306  | 0.00000  |
| 164 | C8  | DXZ | 0.00000  | 0.00000  | 0.00000  | 0.00000  | -0.00463 |
| 165 | C8  | DYZ | 0.00000  | 0.00000  | 0.00000  | 0.00000  | -0.01434 |
| 166 | H8  | S   | 0.16773  | -0.02269 | -0.43883 | 0.18006  | 0.00000  |
| 167 | H8  | S   | -0.04077 | -0.85450 | -0.18300 | -0.11173 | 0.00000  |
| 168 | H8  | PX  | 0.00572  | 0.04548  | -0.02534 | 0.02336  | 0.00000  |
| 169 | H8  | PY  | 0.00538  | 0.00500  | 0.00723  | 0.03225  | 0.00000  |
| 170 | H8  | PZ  | 0.00000  | 0.00000  | 0.00000  | 0.00000  | 0.01428  |
| 171 | C10 | S   | -0.00069 | -0.01109 | -0.00352 | -0.00650 | 0.00000  |
| 172 | C10 | S   | 0.34930  | 0.13360  | 0.21959  | -0.60561 | 0.00000  |
| 173 | C10 | PX  | -0.06801 | 0.09289  | 0.00996  | -0.05760 | 0.00000  |
| 174 | C10 | PY  | -0.17295 | -0.05461 | 0.19299  | -0.24572 | 0.00000  |
| 175 | C10 | PZ  | 0.00000  | 0.00000  | 0.00000  | 0.00000  | 0.01152  |
| 176 | C10 | S   | -1.19547 | 0.22603  | -0.75172 | 1.48110  | 0.00000  |
| 177 | C10 | PX  | 0.36691  | -0.42311 | -0.52336 | -0.35827 | 0.00000  |
| 178 | C10 | PY  | 0.29228  | 0.42100  | -0.73235 | 0.52709  | 0.00000  |
| 179 | C10 | PZ  | 0.00000  | 0.00000  | 0.00000  | 0.00000  | 0.00637  |
| 180 | C10 | DXX | -0.04040 | -0.03413 | 0.08028  | -0.04491 | 0.00000  |
| 181 | C10 | DYY | 0.02166  | 0.00058  | -0.04783 | -0.00945 | 0.00000  |
| 182 | C10 | DZZ | 0.05376  | 0.03714  | -0.01048 | -0.02583 | 0.00000  |
| 183 | C10 | DXY | -0.00660 | -0.02546 | -0.03952 | -0.05106 | 0.00000  |
| 184 | C10 | DXZ | 0.00000  | 0.00000  | 0.00000  | 0.00000  | -0.00562 |
| 185 | C10 | DYZ | 0.00000  | 0.00000  | 0.00000  | 0.00000  | 0.00161  |
| 186 | H16 | S   | -0.04818 | -0.04376 | 0.18791  | 0.02707  | 0.00000  |
| 187 | H16 | S   | 0.25763  | 0.41301  | 0.00957  | -0.08654 | 0.00000  |
| 188 | H16 | PX  | -0.01735 | -0.02579 | 0.00351  | 0.01965  | 0.00000  |
| 189 | H16 | PY  | -0.00792 | -0.01187 | -0.01270 | -0.01068 | 0.00000  |
| 190 | H16 | PZ  | 0.00000  | 0.00000  | 0.00000  | 0.00000  | -0.00139 |
| 191 | H18 | S   | -0.09729 | -0.19962 | -0.19232 | -0.13063 | 0.00000  |
| 192 | H18 | S   | 0.63962  | 0.18212  | -0.28093 | -0.10504 | 0.00000  |
| 193 | H18 | PX  | 0.03015  | 0.00378  | -0.01844 | 0.01172  | 0.00000  |
| 194 | H18 | PY  | 0.02232  | 0.01301  | 0.02793  | 0.00491  | 0.00000  |
| 195 | H18 | PZ  | 0.00000  | 0.00000  | 0.00000  | 0.00000  | 0.00115  |
| 196 | C9  | S   | -0.00030 | 0.01094  | -0.01323 | 0.00810  | 0.00000  |
| 197 | C9  | S   | -0.25940 | -0.00676 | -0.24006 | -0.00135 | 0.00000  |
| 198 | C9  | PX  | -0.06453 | -0.01280 | 0.05003  | -0.03826 | 0.00000  |
| 199 | C9  | PY  | -0.04055 | -0.20053 | -0.04761 | 0.07557  | 0.00000  |
| 200 | C9  | PZ  | 0.00000  | 0.00000  | 0.00000  | 0.00000  | 0.03576  |
| 201 | C9  | S   | 0.88392  | 0.07191  | 0.59488  | 0.15526  | 0.00000  |
| 202 | C9  | PX  | -0.09423 | -0.06363 | -0.08421 | -0.19331 | 0.00000  |



|     |    |     |          |          |          |          |          |
|-----|----|-----|----------|----------|----------|----------|----------|
| 203 | C9 | PY  | 0.39010  | 0.29738  | 0.30830  | 0.21125  | 0.00000  |
| 204 | C9 | PZ  | 0.00000  | 0.00000  | 0.00000  | 0.00000  | 0.47754  |
| 205 | C9 | DXX | -0.03115 | 0.00638  | -0.03902 | -0.05157 | 0.00000  |
| 206 | C9 | DYY | -0.05500 | 0.01864  | -0.04208 | -0.04265 | 0.00000  |
| 207 | C9 | DZZ | 0.06973  | 0.00588  | 0.02837  | 0.12195  | 0.00000  |
| 208 | C9 | DXY | 0.01495  | -0.03736 | -0.01191 | 0.09204  | 0.00000  |
| 209 | C9 | DXZ | 0.00000  | 0.00000  | 0.00000  | 0.00000  | -0.01271 |
| 210 | C9 | DYZ | 0.00000  | 0.00000  | 0.00000  | 0.00000  | 0.13669  |
| 211 | H3 | S   | -0.18435 | 0.16437  | -0.10238 | -0.19870 | 0.00000  |
| 212 | H3 | S   | -0.23111 | -0.32332 | -0.22466 | 0.09266  | 0.00000  |
| 213 | H3 | PX  | 0.00897  | -0.02624 | 0.00597  | 0.06077  | 0.00000  |
| 214 | H3 | PY  | 0.00694  | 0.03091  | 0.00976  | 0.00224  | 0.00000  |
| 215 | H3 | PZ  | 0.00000  | 0.00000  | 0.00000  | 0.00000  | 0.07959  |
| 216 | H5 | S   | 0.14212  | 0.11151  | 0.01905  | 0.13284  | 0.12674  |
| 217 | H5 | S   | -0.31950 | -0.02019 | -0.15374 | -0.13259 | 0.08823  |
| 218 | H5 | PX  | -0.01206 | 0.00982  | -0.01450 | -0.03980 | -0.02936 |
| 219 | H5 | PY  | 0.00926  | -0.00147 | 0.00250  | 0.02351  | -0.06824 |
| 220 | H5 | PZ  | -0.03157 | 0.00016  | -0.00870 | -0.04583 | 0.00031  |
| 221 | H7 | S   | 0.14212  | 0.11151  | 0.01905  | 0.13284  | -0.12674 |
| 222 | H7 | S   | -0.31950 | -0.02019 | -0.15374 | -0.13259 | -0.08823 |
| 223 | H7 | PX  | -0.01206 | 0.00982  | -0.01450 | -0.03980 | 0.02936  |
| 224 | H7 | PY  | 0.00926  | -0.00147 | 0.00250  | 0.02351  | 0.06824  |
| 225 | H7 | PZ  | 0.03157  | -0.00016 | 0.00870  | 0.04583  | 0.00031  |

|              |          |          |          |          |          |
|--------------|----------|----------|----------|----------|----------|
| M0:          | 111      | 112      | 113      | 114      | 115      |
| Eigenvalues: | 1.32518  | 1.38955  | 1.40283  | 1.43085  | 1.44189  |
| (ev):        | 36.05988 | 37.81152 | 38.17308 | 38.93552 | 39.23593 |

|    |    |     |          |          |          |          |          |
|----|----|-----|----------|----------|----------|----------|----------|
|    |    |     | A        | A        | A        | A        | A        |
| 1  | H1 | S   | 0.24323  | -0.18973 | -0.15681 | 0.39863  | 0.41746  |
| 2  | H1 | S   | -0.31426 | 0.20582  | -0.30281 | 0.28971  | 0.52346  |
| 3  | H1 | PX  | 0.03043  | -0.02886 | -0.00866 | -0.00712 | 0.00789  |
| 4  | H1 | PY  | 0.00012  | -0.02112 | -0.00137 | -0.02258 | 0.00920  |
| 5  | H1 | PZ  | 0.00000  | 0.00000  | 0.00000  | 0.00000  | 0.00000  |
| 6  | C1 | S   | -0.00226 | 0.02531  | 0.01688  | 0.01250  | 0.01621  |
| 7  | C1 | S   | 0.37608  | 0.45633  | 0.30298  | 0.01441  | 0.49269  |
| 8  | C1 | PX  | -0.31523 | 0.10331  | -0.16626 | 0.22062  | -0.08212 |
| 9  | C1 | PY  | 0.20206  | 0.09509  | 0.13929  | 0.19378  | 0.25830  |
| 10 | C1 | PZ  | 0.00000  | 0.00000  | 0.00000  | 0.00000  | 0.00000  |
| 11 | C1 | S   | -0.97764 | -2.56479 | -1.60913 | -2.67605 | -1.76407 |
| 12 | C1 | PX  | 1.51170  | 0.44336  | 1.50669  | 0.44054  | -0.88679 |
| 13 | C1 | PY  | -3.94887 | 0.73740  | -0.99287 | -3.47423 | -0.64809 |
| 14 | C1 | PZ  | 0.00000  | 0.00000  | 0.00000  | 0.00000  | 0.00000  |
| 15 | C1 | DXX | 0.04321  | 0.03832  | -0.03234 | 0.05481  | 0.10750  |
| 16 | C1 | DYY | 0.03874  | 0.01596  | 0.03994  | -0.05737 | -0.03212 |
| 17 | C1 | DZZ | -0.01780 | -0.02297 | 0.01094  | -0.00787 | -0.01061 |
| 18 | C1 | DXY | 0.11616  | -0.03919 | 0.04169  | 0.12768  | 0.05879  |
| 19 | C1 | DXZ | 0.00000  | 0.00000  | 0.00000  | 0.00000  | 0.00000  |
| 20 | C1 | DYZ | 0.00000  | 0.00000  | 0.00000  | 0.00000  | 0.00000  |
| 21 | C2 | S   | 0.00416  | 0.02343  | 0.01165  | 0.00787  | -0.01066 |
| 22 | C2 | S   | -0.38503 | 0.59148  | 0.21648  | 0.63036  | -0.28439 |
| 23 | C2 | PX  | -0.15856 | 0.04926  | -0.06282 | 0.29974  | 0.02257  |
| 24 | C2 | PY  | -0.25834 | -0.12448 | 0.02914  | 0.21034  | -0.10859 |
| 25 | C2 | PZ  | 0.00000  | 0.00000  | 0.00000  | 0.00000  | 0.00000  |

|    |    |     |          |          |          |          |          |
|----|----|-----|----------|----------|----------|----------|----------|
| 26 | C2 | S   | 0.64566  | -2.24522 | -1.23886 | -0.16494 | 0.89136  |
| 27 | C2 | PX  | -0.89269 | -0.34595 | -0.14029 | -0.41590 | -0.96315 |
| 28 | C2 | PY  | 2.09254  | 0.37308  | 1.12802  | -0.90981 | 0.72873  |
| 29 | C2 | PZ  | 0.00000  | 0.00000  | 0.00000  | 0.00000  | 0.00000  |
| 30 | C2 | DXX | -0.09734 | 0.06048  | 0.04620  | 0.05965  | -0.06467 |
| 31 | C2 | DYY | 0.03500  | 0.04792  | -0.02036 | 0.02190  | 0.02150  |
| 32 | C2 | DZZ | -0.00864 | -0.03573 | 0.00570  | 0.00317  | 0.01106  |
| 33 | C2 | DXY | 0.01216  | 0.05762  | -0.00293 | -0.06686 | -0.03878 |
| 34 | C2 | DXZ | 0.00000  | 0.00000  | 0.00000  | 0.00000  | 0.00000  |
| 35 | C2 | DYZ | 0.00000  | 0.00000  | 0.00000  | 0.00000  | 0.00000  |
| 36 | C3 | S   | 0.00843  | 0.00276  | -0.00511 | -0.00622 | -0.02441 |
| 37 | C3 | S   | 0.34117  | -0.25382 | -0.08341 | -0.10878 | -0.73411 |
| 38 | C3 | PX  | 0.39302  | -0.09602 | -0.11995 | 0.29704  | -0.18955 |
| 39 | C3 | PY  | -0.05948 | -0.25964 | 0.32786  | 0.02348  | -0.03781 |
| 40 | C3 | PZ  | 0.00000  | 0.00000  | 0.00000  | 0.00000  | 0.00000  |
| 41 | C3 | S   | -2.11717 | 1.91337  | 1.69674  | -0.86518 | 2.60288  |
| 42 | C3 | PX  | -2.69227 | 1.11612  | -0.28756 | -1.78607 | 1.39338  |
| 43 | C3 | PY  | -2.19785 | 1.23906  | -1.29306 | -1.21229 | -0.51876 |
| 44 | C3 | PZ  | 0.00000  | 0.00000  | 0.00000  | 0.00000  | 0.00000  |
| 45 | C3 | DXX | 0.02060  | 0.00579  | 0.00047  | -0.02281 | 0.00166  |
| 46 | C3 | DYY | -0.01637 | 0.03353  | 0.03122  | -0.03278 | -0.05025 |
| 47 | C3 | DZZ | 0.01668  | -0.05734 | -0.00703 | 0.01494  | -0.01015 |
| 48 | C3 | DXY | -0.00902 | -0.00304 | -0.00244 | -0.06955 | -0.00822 |
| 49 | C3 | DXZ | 0.00000  | 0.00000  | 0.00000  | 0.00000  | 0.00000  |
| 50 | C3 | DYZ | 0.00000  | 0.00000  | 0.00000  | 0.00000  | 0.00000  |
| 51 | C4 | S   | 0.00828  | -0.00474 | -0.00471 | 0.00804  | 0.00679  |
| 52 | C4 | S   | -0.17955 | 0.16306  | -0.24883 | -0.02840 | -0.14671 |
| 53 | C4 | PX  | -0.43119 | 0.00737  | -0.15378 | -0.37145 | -0.13771 |
| 54 | C4 | PY  | 0.15094  | -0.08479 | 0.08048  | 0.14315  | 0.19012  |
| 55 | C4 | PZ  | 0.00000  | 0.00000  | 0.00000  | 0.00000  | 0.00000  |
| 56 | C4 | S   | 1.62738  | -0.28058 | 1.76256  | 1.01312  | -0.71170 |
| 57 | C4 | PX  | 4.15538  | -0.08707 | 1.48868  | 4.94507  | 1.11645  |
| 58 | C4 | PY  | 0.06531  | -0.99243 | -0.76069 | -1.22448 | 0.39803  |
| 59 | C4 | PZ  | 0.00000  | 0.00000  | 0.00000  | 0.00000  | 0.00000  |
| 60 | C4 | DXX | 0.03552  | 0.08391  | -0.03413 | 0.02010  | -0.03066 |
| 61 | C4 | DYY | 0.01799  | -0.06916 | 0.04795  | 0.03397  | 0.00170  |
| 62 | C4 | DZZ | -0.04420 | -0.04393 | -0.00839 | -0.01827 | -0.00295 |
| 63 | C4 | DXY | -0.06181 | -0.04635 | -0.06761 | 0.00009  | -0.06036 |
| 64 | C4 | DXZ | 0.00000  | 0.00000  | 0.00000  | 0.00000  | 0.00000  |
| 65 | C4 | DYZ | 0.00000  | 0.00000  | 0.00000  | 0.00000  | 0.00000  |
| 66 | C5 | S   | -0.00170 | 0.00214  | -0.01077 | -0.03814 | -0.00689 |
| 67 | C5 | S   | 0.25751  | -0.19340 | -0.37421 | -0.62970 | -0.04697 |
| 68 | C5 | PX  | -0.06005 | -0.09713 | -0.17901 | 0.22268  | -0.11751 |
| 69 | C5 | PY  | -0.22758 | 0.04228  | 0.09477  | 0.03601  | -0.07210 |
| 70 | C5 | PZ  | 0.00000  | 0.00000  | 0.00000  | 0.00000  | 0.00000  |
| 71 | C5 | S   | 0.18830  | 0.48761  | 0.44628  | 4.74132  | 0.16194  |
| 72 | C5 | PX  | 2.16539  | -0.43037 | 0.90094  | 0.61882  | 1.81747  |
| 73 | C5 | PY  | 1.59804  | 0.18840  | 0.27157  | 1.54207  | 0.19289  |
| 74 | C5 | PZ  | 0.00000  | 0.00000  | 0.00000  | 0.00000  | 0.00000  |
| 75 | C5 | DXX | 0.10789  | -0.03357 | -0.05696 | -0.05394 | -0.00621 |
| 76 | C5 | DYY | -0.02922 | 0.02669  | -0.03635 | -0.00980 | -0.01157 |
| 77 | C5 | DZZ | -0.01558 | -0.03596 | 0.03237  | -0.00112 | 0.01858  |
| 78 | C5 | DXY | -0.03334 | 0.03949  | -0.00109 | 0.13816  | -0.03926 |
| 79 | C5 | DXZ | 0.00000  | 0.00000  | 0.00000  | 0.00000  | 0.00000  |

|     |    |     |          |          |          |          |          |
|-----|----|-----|----------|----------|----------|----------|----------|
| 80  | C5 | DYZ | 0.00000  | 0.00000  | 0.00000  | 0.00000  | 0.00000  |
| 81  | C6 | S   | -0.00035 | -0.02231 | 0.00423  | -0.00236 | 0.01779  |
| 82  | C6 | S   | 0.05511  | -0.19606 | -0.07892 | 0.00874  | 0.54520  |
| 83  | C6 | PX  | 0.05306  | 0.16798  | 0.06233  | -0.08332 | 0.11214  |
| 84  | C6 | PY  | -0.09501 | -0.46294 | 0.09580  | 0.14460  | 0.22395  |
| 85  | C6 | PZ  | 0.00000  | 0.00000  | 0.00000  | 0.00000  | 0.00000  |
| 86  | C6 | S   | -0.95290 | 0.15908  | -0.19989 | -0.89825 | -0.93891 |
| 87  | C6 | PX  | -2.08402 | -0.24963 | -1.84162 | 0.21772  | -0.56176 |
| 88  | C6 | PY  | 1.42065  | 2.20170  | 0.41451  | -1.03758 | 0.42661  |
| 89  | C6 | PZ  | 0.00000  | 0.00000  | 0.00000  | 0.00000  | 0.00000  |
| 90  | C6 | DXX | 0.01524  | 0.06493  | 0.00229  | -0.04735 | 0.06447  |
| 91  | C6 | DYY | -0.04205 | -0.13524 | -0.03636 | 0.03031  | 0.02718  |
| 92  | C6 | DZZ | 0.00517  | 0.00523  | 0.01387  | 0.01421  | -0.01735 |
| 93  | C6 | DXY | -0.05356 | -0.05620 | -0.03953 | -0.05661 | 0.00923  |
| 94  | C6 | DXZ | 0.00000  | 0.00000  | 0.00000  | 0.00000  | 0.00000  |
| 95  | C6 | DYZ | 0.00000  | 0.00000  | 0.00000  | 0.00000  | 0.00000  |
| 96  | C7 | S   | -0.00840 | -0.00034 | -0.01532 | 0.01666  | -0.00271 |
| 97  | C7 | S   | -0.54378 | 0.12312  | -0.05757 | 0.24504  | 0.16078  |
| 98  | C7 | PX  | 0.22628  | -0.09855 | 0.10957  | -0.06683 | -0.03049 |
| 99  | C7 | PY  | 0.03857  | 0.16623  | 0.16741  | 0.02780  | -0.15762 |
| 100 | C7 | PZ  | 0.00000  | 0.00000  | 0.00000  | 0.00000  | 0.00000  |
| 101 | C7 | S   | 0.73761  | 0.04372  | -0.93031 | -0.52063 | -0.24779 |
| 102 | C7 | PX  | 0.25722  | 0.41346  | 0.20207  | 1.19984  | -0.42775 |
| 103 | C7 | PY  | 0.82272  | -1.43309 | -0.94841 | 0.56331  | -1.70423 |
| 104 | C7 | PZ  | 0.00000  | 0.00000  | 0.00000  | 0.00000  | 0.00000  |
| 105 | C7 | DXX | -0.10499 | -0.00547 | -0.02805 | -0.03168 | 0.05217  |
| 106 | C7 | DYY | 0.02021  | 0.02112  | -0.02540 | 0.08943  | -0.00955 |
| 107 | C7 | DZZ | -0.00679 | -0.00613 | 0.02636  | -0.02722 | 0.00208  |
| 108 | C7 | DXY | -0.06936 | -0.00056 | 0.04233  | -0.00026 | 0.08102  |
| 109 | C7 | DXZ | 0.00000  | 0.00000  | 0.00000  | 0.00000  | 0.00000  |
| 110 | C7 | DYZ | 0.00000  | 0.00000  | 0.00000  | 0.00000  | 0.00000  |
| 111 | O1 | S   | 0.00936  | -0.01011 | 0.00257  | -0.00689 | 0.00796  |
| 112 | O1 | S   | -0.13271 | -0.14846 | 0.11623  | -0.09084 | -0.03382 |
| 113 | O1 | PX  | -0.01542 | -0.03818 | -0.03358 | -0.08543 | -0.20422 |
| 114 | O1 | PY  | 0.17242  | 0.28150  | -0.18753 | -0.14049 | 0.16030  |
| 115 | O1 | PZ  | 0.00000  | 0.00000  | 0.00000  | 0.00000  | 0.00000  |
| 116 | O1 | S   | -0.06742 | 0.46115  | -0.16238 | 0.56299  | -0.25144 |
| 117 | O1 | PX  | -0.28673 | -0.18563 | -0.02686 | -0.47662 | 0.23509  |
| 118 | O1 | PY  | 0.21259  | -0.86861 | 0.39587  | 0.26626  | -0.04301 |
| 119 | O1 | PZ  | 0.00000  | 0.00000  | 0.00000  | 0.00000  | 0.00000  |
| 120 | O1 | DXX | -0.00532 | -0.04312 | 0.00467  | 0.00704  | -0.06193 |
| 121 | O1 | DYY | -0.07358 | -0.05462 | 0.05149  | 0.01127  | 0.00927  |
| 122 | O1 | DZZ | -0.01254 | -0.01140 | 0.02639  | -0.09812 | 0.07172  |
| 123 | O1 | DXY | 0.02760  | 0.00124  | 0.03308  | -0.05112 | 0.02564  |
| 124 | O1 | DXZ | 0.00000  | 0.00000  | 0.00000  | 0.00000  | 0.00000  |
| 125 | O1 | DYZ | 0.00000  | 0.00000  | 0.00000  | 0.00000  | 0.00000  |
| 126 | H4 | S   | 0.24532  | -0.29586 | 0.03924  | -0.47545 | 0.32724  |
| 127 | H4 | S   | 0.07100  | -0.16563 | 0.19434  | -0.65234 | 0.43555  |
| 128 | H4 | PX  | -0.02593 | 0.00688  | 0.00500  | 0.00323  | 0.00089  |
| 129 | H4 | PY  | 0.00622  | -0.02287 | -0.00497 | 0.01825  | 0.03306  |
| 130 | H4 | PZ  | 0.00000  | 0.00000  | 0.00000  | 0.00000  | 0.00000  |
| 131 | N1 | S   | 0.00108  | 0.01638  | -0.00129 | -0.00857 | -0.01034 |
| 132 | N1 | S   | 0.13323  | -0.13317 | 0.12693  | -0.15497 | -0.22945 |
| 133 | N1 | PX  | 0.16654  | 0.19043  | 0.14532  | -0.19196 | -0.04724 |

|     |     |     |          |          |          |          |          |
|-----|-----|-----|----------|----------|----------|----------|----------|
| 134 | N1  | PY  | -0.05851 | -0.47065 | -0.19863 | -0.01248 | 0.06398  |
| 135 | N1  | PZ  | 0.00000  | 0.00000  | 0.00000  | 0.00000  | 0.00000  |
| 136 | N1  | S   | 0.66026  | -0.15586 | -0.03572 | 0.45536  | 0.09086  |
| 137 | N1  | PX  | -0.16932 | -1.13382 | 0.01918  | 0.54388  | -0.05230 |
| 138 | N1  | PY  | 0.36282  | 1.81563  | 0.12648  | -0.27014 | 0.65464  |
| 139 | N1  | PZ  | 0.00000  | 0.00000  | 0.00000  | 0.00000  | 0.00000  |
| 140 | N1  | DXX | 0.07098  | -0.06692 | 0.06500  | -0.01372 | -0.09706 |
| 141 | N1  | DYY | 0.03875  | 0.07078  | 0.02835  | -0.05620 | -0.04289 |
| 142 | N1  | DZZ | -0.02865 | -0.01287 | -0.01312 | 0.00056  | 0.00120  |
| 143 | N1  | DXY | 0.05557  | 0.02458  | -0.01846 | 0.00337  | 0.00416  |
| 144 | N1  | DXZ | 0.00000  | 0.00000  | 0.00000  | 0.00000  | 0.00000  |
| 145 | N1  | DYZ | 0.00000  | 0.00000  | 0.00000  | 0.00000  | 0.00000  |
| 146 | H6  | S   | -0.20019 | 0.22357  | 0.18740  | -0.05120 | -0.28056 |
| 147 | H6  | S   | -0.03485 | 0.12300  | 0.21197  | -0.20600 | -0.31056 |
| 148 | H6  | PX  | 0.01991  | 0.00059  | -0.00573 | -0.01344 | 0.00432  |
| 149 | H6  | PY  | 0.01688  | 0.00984  | 0.02623  | -0.02785 | 0.01954  |
| 150 | H6  | PZ  | 0.00000  | 0.00000  | 0.00000  | 0.00000  | 0.00000  |
| 151 | C8  | S   | -0.01295 | -0.00776 | 0.03698  | 0.00210  | 0.01444  |
| 152 | C8  | S   | -0.22683 | -0.19863 | 0.97491  | 0.08825  | 0.25837  |
| 153 | C8  | PX  | -0.00373 | 0.14467  | 0.18258  | -0.06063 | 0.27689  |
| 154 | C8  | PY  | 0.07710  | 0.04746  | -0.47018 | 0.06600  | -0.03778 |
| 155 | C8  | PZ  | 0.00000  | 0.00000  | 0.00000  | 0.00000  | 0.00000  |
| 156 | C8  | S   | 1.15944  | 1.06689  | -4.86905 | 0.30701  | -1.55296 |
| 157 | C8  | PX  | 0.60537  | -2.42147 | -0.60283 | 1.16673  | -2.57434 |
| 158 | C8  | PY  | 0.33020  | 0.96963  | 3.14729  | -0.44958 | -0.46389 |
| 159 | C8  | PZ  | 0.00000  | 0.00000  | 0.00000  | 0.00000  | 0.00000  |
| 160 | C8  | DXX | 0.00042  | 0.05795  | 0.10979  | -0.00720 | 0.00483  |
| 161 | C8  | DYY | -0.02017 | -0.01737 | -0.05661 | 0.03292  | 0.01504  |
| 162 | C8  | DZZ | 0.00422  | -0.01514 | 0.02788  | -0.01747 | 0.00093  |
| 163 | C8  | DXY | -0.06930 | -0.04073 | -0.00054 | 0.04317  | 0.02431  |
| 164 | C8  | DXZ | 0.00000  | 0.00000  | 0.00000  | 0.00000  | 0.00000  |
| 165 | C8  | DYZ | 0.00000  | 0.00000  | 0.00000  | 0.00000  | 0.00000  |
| 166 | H8  | S   | -0.10264 | -0.09844 | 0.04286  | -0.25029 | 0.12811  |
| 167 | H8  | S   | -0.13271 | -0.22347 | -0.00192 | -0.37853 | 0.14519  |
| 168 | H8  | PX  | -0.01951 | 0.00241  | -0.01309 | -0.01801 | 0.00531  |
| 169 | H8  | PY  | -0.02732 | -0.02821 | -0.00645 | -0.00310 | -0.01173 |
| 170 | H8  | PZ  | 0.00000  | 0.00000  | 0.00000  | 0.00000  | 0.00000  |
| 171 | C10 | S   | -0.00112 | -0.00484 | -0.03301 | 0.00252  | -0.00223 |
| 172 | C10 | S   | 0.22121  | 0.19612  | -1.07890 | -0.00060 | -0.18095 |
| 173 | C10 | PX  | -0.01205 | 0.10953  | 0.08257  | 0.05305  | -0.01913 |
| 174 | C10 | PY  | 0.06332  | 0.13894  | -0.17635 | -0.02165 | -0.02950 |
| 175 | C10 | PZ  | 0.00000  | 0.00000  | 0.00000  | 0.00000  | 0.00000  |
| 176 | C10 | S   | -0.54625 | 0.41071  | 5.52727  | -0.53744 | 0.79424  |
| 177 | C10 | PX  | -0.72910 | 0.20724  | -1.04782 | -0.47740 | 1.59106  |
| 178 | C10 | PY  | -0.23231 | 0.30781  | 2.01238  | -0.36103 | 0.53351  |
| 179 | C10 | PZ  | 0.00000  | 0.00000  | 0.00000  | 0.00000  | 0.00000  |
| 180 | C10 | DXX | 0.03701  | -0.02004 | -0.14916 | 0.03196  | -0.06231 |
| 181 | C10 | DYY | -0.04080 | 0.00116  | 0.06675  | -0.02337 | 0.06799  |
| 182 | C10 | DZZ | 0.02664  | 0.03501  | -0.02755 | -0.01638 | -0.02324 |
| 183 | C10 | DXY | -0.06463 | 0.02885  | -0.11032 | -0.03103 | 0.10139  |
| 184 | C10 | DXZ | 0.00000  | 0.00000  | 0.00000  | 0.00000  | 0.00000  |
| 185 | C10 | DYZ | 0.00000  | 0.00000  | 0.00000  | 0.00000  | 0.00000  |
| 186 | H16 | S   | 0.27649  | -0.02991 | 0.05870  | 0.07743  | -0.38380 |
| 187 | H16 | S   | 0.27556  | 0.07188  | -0.03491 | 0.13563  | -0.56041 |

|     |     |     |          |          |          |          |          |
|-----|-----|-----|----------|----------|----------|----------|----------|
| 188 | H16 | PX  | 0.00256  | -0.02207 | 0.01008  | -0.00446 | -0.00504 |
| 189 | H16 | PY  | -0.03580 | -0.01039 | -0.05071 | 0.00059  | 0.03778  |
| 190 | H16 | PZ  | 0.00000  | 0.00000  | 0.00000  | 0.00000  | 0.00000  |
| 191 | H18 | S   | -0.25564 | 0.03231  | -0.33475 | -0.06506 | 0.35519  |
| 192 | H18 | S   | -0.03152 | 0.13355  | -0.30006 | -0.19306 | 0.34519  |
| 193 | H18 | PX  | -0.00710 | -0.02096 | -0.01411 | -0.00383 | 0.00902  |
| 194 | H18 | PY  | 0.03849  | -0.00596 | -0.00588 | 0.00395  | -0.04558 |
| 195 | H18 | PZ  | 0.00000  | 0.00000  | 0.00000  | 0.00000  | 0.00000  |
| 196 | C9  | S   | 0.02871  | -0.03967 | -0.00292 | 0.00300  | -0.02296 |
| 197 | C9  | S   | 0.42319  | -0.52183 | -0.03550 | 0.18153  | -0.25532 |
| 198 | C9  | PX  | -0.07277 | 0.00895  | 0.02327  | -0.06194 | 0.04796  |
| 199 | C9  | PY  | 0.21236  | 0.15718  | -0.00358 | 0.15183  | 0.16303  |
| 200 | C9  | PZ  | 0.00000  | 0.00000  | 0.00000  | 0.00000  | 0.00000  |
| 201 | C9  | S   | -1.30888 | 1.56714  | -0.00297 | -0.54577 | 0.40380  |
| 202 | C9  | PX  | 0.24386  | -0.23462 | 0.10161  | 0.20459  | 0.07209  |
| 203 | C9  | PY  | -0.46923 | -0.23025 | -0.02020 | -0.35806 | -0.28556 |
| 204 | C9  | PZ  | 0.00000  | 0.00000  | 0.00000  | 0.00000  | 0.00000  |
| 205 | C9  | DXX | -0.00497 | -0.05236 | 0.02080  | -0.02768 | -0.04877 |
| 206 | C9  | DYY | 0.03582  | -0.03904 | -0.00053 | 0.04787  | -0.02202 |
| 207 | C9  | DZZ | 0.03291  | 0.01133  | -0.04497 | -0.02236 | -0.00267 |
| 208 | C9  | DXY | 0.05709  | 0.09287  | -0.06027 | -0.00158 | -0.00247 |
| 209 | C9  | DXZ | 0.00000  | 0.00000  | 0.00000  | 0.00000  | 0.00000  |
| 210 | C9  | DYZ | 0.00000  | 0.00000  | 0.00000  | 0.00000  | 0.00000  |
| 211 | H3  | S   | 0.06684  | -0.24692 | 0.01435  | -0.02269 | -0.07856 |
| 212 | H3  | S   | 0.58276  | -0.01640 | -0.03052 | 0.32685  | 0.14905  |
| 213 | H3  | PX  | 0.03864  | 0.06118  | -0.03495 | -0.00234 | 0.02210  |
| 214 | H3  | PY  | -0.02135 | -0.01105 | -0.00827 | -0.03345 | -0.01628 |
| 215 | H3  | PZ  | 0.00000  | 0.00000  | 0.00000  | 0.00000  | 0.00000  |
| 216 | H5  | S   | 0.01183  | -0.16666 | -0.03465 | -0.08042 | -0.13525 |
| 217 | H5  | S   | 0.19060  | -0.23123 | -0.00305 | 0.11290  | -0.07953 |
| 218 | H5  | PX  | -0.01352 | -0.02666 | 0.01724  | 0.00064  | -0.01634 |
| 219 | H5  | PY  | 0.00174  | 0.00539  | -0.01336 | -0.00733 | -0.01217 |
| 220 | H5  | PZ  | -0.01554 | -0.01834 | 0.01791  | 0.00143  | -0.00109 |
| 221 | H7  | S   | 0.01183  | -0.16666 | -0.03465 | -0.08042 | -0.13525 |
| 222 | H7  | S   | 0.19060  | -0.23123 | -0.00305 | 0.11290  | -0.07953 |
| 223 | H7  | PX  | -0.01352 | -0.02666 | 0.01724  | 0.00064  | -0.01634 |
| 224 | H7  | PY  | 0.00174  | 0.00539  | -0.01336 | -0.00733 | -0.01217 |
| 225 | H7  | PZ  | 0.01554  | 0.01834  | -0.01791 | -0.00143 | 0.00109  |

|              |          |          |          |          |          |
|--------------|----------|----------|----------|----------|----------|
| M0:          | 116      | 117      | 118      | 119      | 120      |
| Eigenvalues: | 1.47318  | 1.48252  | 1.51650  | 1.55009  | 1.58637  |
| (ev):        | 40.08715 | 40.34143 | 41.26607 | 42.18025 | 43.16741 |

|    |    |    |          |          |          |          |         |
|----|----|----|----------|----------|----------|----------|---------|
|    |    | A  | A        | A        | A        | A        |         |
| 1  | H1 | S  | 0.00000  | -0.08782 | -0.18463 | 0.00000  | 0.00000 |
| 2  | H1 | S  | 0.00000  | -0.14642 | -0.45293 | 0.00000  | 0.00000 |
| 3  | H1 | PX | 0.00000  | 0.01095  | -0.02810 | 0.00000  | 0.00000 |
| 4  | H1 | PY | 0.00000  | -0.00672 | -0.01599 | 0.00000  | 0.00000 |
| 5  | H1 | PZ | 0.01441  | 0.00000  | 0.00000  | -0.11751 | 0.08260 |
| 6  | C1 | S  | 0.00000  | -0.01273 | 0.00339  | 0.00000  | 0.00000 |
| 7  | C1 | S  | 0.00000  | 0.00838  | 0.05028  | 0.00000  | 0.00000 |
| 8  | C1 | PX | 0.00000  | -0.14005 | 0.00576  | 0.00000  | 0.00000 |
| 9  | C1 | PY | 0.00000  | 0.02018  | 0.16580  | 0.00000  | 0.00000 |
| 10 | C1 | PZ | -0.02292 | 0.00000  | 0.00000  | -0.08732 | 0.07378 |

|    |    |     |          |          |          |          |          |
|----|----|-----|----------|----------|----------|----------|----------|
| 11 | C1 | S   | 0.00000  | 0.89229  | -0.06489 | 0.00000  | 0.00000  |
| 12 | C1 | PX  | 0.00000  | 0.97679  | 1.03613  | 0.00000  | 0.00000  |
| 13 | C1 | PY  | 0.00000  | -2.31024 | -0.25144 | 0.00000  | 0.00000  |
| 14 | C1 | PZ  | 0.01278  | 0.00000  | 0.00000  | 0.06685  | -0.06528 |
| 15 | C1 | DXX | 0.00000  | -0.04013 | -0.00255 | 0.00000  | 0.00000  |
| 16 | C1 | DYY | 0.00000  | 0.01504  | 0.02318  | 0.00000  | 0.00000  |
| 17 | C1 | DZZ | 0.00000  | 0.02785  | -0.01948 | 0.00000  | 0.00000  |
| 18 | C1 | DXY | 0.00000  | -0.00663 | -0.03503 | 0.00000  | 0.00000  |
| 19 | C1 | DXZ | -0.04134 | 0.00000  | 0.00000  | -0.27508 | 0.15174  |
| 20 | C1 | DYZ | 0.29314  | 0.00000  | 0.00000  | -0.00356 | 0.19797  |
| 21 | C2 | S   | 0.00000  | 0.01542  | 0.01909  | 0.00000  | 0.00000  |
| 22 | C2 | S   | 0.00000  | 0.37280  | 0.28068  | 0.00000  | 0.00000  |
| 23 | C2 | PX  | 0.00000  | -0.02837 | 0.14259  | 0.00000  | 0.00000  |
| 24 | C2 | PY  | 0.00000  | -0.13622 | 0.04154  | 0.00000  | 0.00000  |
| 25 | C2 | PZ  | -0.01632 | 0.00000  | 0.00000  | -0.03230 | -0.06947 |
| 26 | C2 | S   | 0.00000  | -1.96039 | -0.82169 | 0.00000  | 0.00000  |
| 27 | C2 | PX  | 0.00000  | 0.51819  | -1.64223 | 0.00000  | 0.00000  |
| 28 | C2 | PY  | 0.00000  | 2.27039  | 0.68768  | 0.00000  | 0.00000  |
| 29 | C2 | PZ  | 0.02475  | 0.00000  | 0.00000  | -0.06969 | 0.01066  |
| 30 | C2 | DXX | 0.00000  | 0.11598  | -0.05272 | 0.00000  | 0.00000  |
| 31 | C2 | DYY | 0.00000  | -0.06735 | 0.06807  | 0.00000  | 0.00000  |
| 32 | C2 | DZZ | 0.00000  | 0.01648  | -0.01147 | 0.00000  | 0.00000  |
| 33 | C2 | DXY | 0.00000  | 0.05408  | 0.01380  | 0.00000  | 0.00000  |
| 34 | C2 | DXZ | -0.15032 | 0.00000  | 0.00000  | 0.16973  | 0.17053  |
| 35 | C2 | DYZ | 0.23215  | 0.00000  | 0.00000  | 0.08673  | 0.01933  |
| 36 | C3 | S   | 0.00000  | -0.02874 | 0.00934  | 0.00000  | 0.00000  |
| 37 | C3 | S   | 0.00000  | -0.26349 | 0.12225  | 0.00000  | 0.00000  |
| 38 | C3 | PX  | 0.00000  | 0.10225  | 0.12526  | 0.00000  | 0.00000  |
| 39 | C3 | PY  | 0.00000  | 0.26170  | 0.06411  | 0.00000  | 0.00000  |
| 40 | C3 | PZ  | -0.01522 | 0.00000  | 0.00000  | 0.03593  | -0.02248 |
| 41 | C3 | S   | 0.00000  | 0.06632  | -1.18154 | 0.00000  | 0.00000  |
| 42 | C3 | PX  | 0.00000  | -3.57130 | -1.05017 | 0.00000  | 0.00000  |
| 43 | C3 | PY  | 0.00000  | -1.98264 | 0.60807  | 0.00000  | 0.00000  |
| 44 | C3 | PZ  | -0.03168 | 0.00000  | 0.00000  | -0.05514 | -0.04242 |
| 45 | C3 | DXX | 0.00000  | -0.00570 | 0.01650  | 0.00000  | 0.00000  |
| 46 | C3 | DYY | 0.00000  | -0.08255 | -0.02201 | 0.00000  | 0.00000  |
| 47 | C3 | DZZ | 0.00000  | 0.06860  | -0.00750 | 0.00000  | 0.00000  |
| 48 | C3 | DXY | 0.00000  | 0.05538  | -0.02313 | 0.00000  | 0.00000  |
| 49 | C3 | DXZ | -0.17487 | 0.00000  | 0.00000  | -0.07999 | 0.05513  |
| 50 | C3 | DYZ | -0.28175 | 0.00000  | 0.00000  | 0.11874  | -0.18349 |
| 51 | C4 | S   | 0.00000  | 0.02017  | -0.00030 | 0.00000  | 0.00000  |
| 52 | C4 | S   | 0.00000  | 0.33722  | -0.14553 | 0.00000  | 0.00000  |
| 53 | C4 | PX  | 0.00000  | -0.26129 | 0.21157  | 0.00000  | 0.00000  |
| 54 | C4 | PY  | 0.00000  | -0.07400 | 0.05234  | 0.00000  | 0.00000  |
| 55 | C4 | PZ  | -0.04041 | 0.00000  | 0.00000  | 0.08178  | -0.03869 |
| 56 | C4 | S   | 0.00000  | -0.09336 | 0.67669  | 0.00000  | 0.00000  |
| 57 | C4 | PX  | 0.00000  | 2.38520  | -0.74554 | 0.00000  | 0.00000  |
| 58 | C4 | PY  | 0.00000  | 0.84262  | -0.77986 | 0.00000  | 0.00000  |
| 59 | C4 | PZ  | 0.06677  | 0.00000  | 0.00000  | -0.17715 | 0.04379  |
| 60 | C4 | DXX | 0.00000  | -0.01755 | -0.05110 | 0.00000  | 0.00000  |
| 61 | C4 | DYY | 0.00000  | 0.07168  | 0.01771  | 0.00000  | 0.00000  |
| 62 | C4 | DZZ | 0.00000  | 0.01036  | -0.00162 | 0.00000  | 0.00000  |
| 63 | C4 | DXY | 0.00000  | -0.03925 | -0.06524 | 0.00000  | 0.00000  |
| 64 | C4 | DXZ | 0.31383  | 0.00000  | 0.00000  | 0.14993  | 0.11573  |

|     |    |     |          |          |          |          |          |
|-----|----|-----|----------|----------|----------|----------|----------|
| 65  | C4 | DYZ | 0.00070  | 0.00000  | 0.00000  | -0.27489 | 0.15813  |
| 66  | C5 | S   | 0.00000  | -0.02844 | 0.00109  | 0.00000  | 0.00000  |
| 67  | C5 | S   | 0.00000  | -0.61476 | 0.07941  | 0.00000  | 0.00000  |
| 68  | C5 | PX  | 0.00000  | -0.08086 | -0.13578 | 0.00000  | 0.00000  |
| 69  | C5 | PY  | 0.00000  | 0.13967  | -0.22160 | 0.00000  | 0.00000  |
| 70  | C5 | PZ  | -0.02849 | 0.00000  | 0.00000  | -0.06514 | 0.02648  |
| 71  | C5 | S   | 0.00000  | 1.52300  | -0.87181 | 0.00000  | 0.00000  |
| 72  | C5 | PX  | 0.00000  | 1.39936  | 0.63067  | 0.00000  | 0.00000  |
| 73  | C5 | PY  | 0.00000  | 0.40757  | 0.54516  | 0.00000  | 0.00000  |
| 74  | C5 | PZ  | 0.01838  | 0.00000  | 0.00000  | 0.14723  | -0.02610 |
| 75  | C5 | DXX | 0.00000  | -0.02453 | -0.08162 | 0.00000  | 0.00000  |
| 76  | C5 | DYY | 0.00000  | -0.07437 | 0.04546  | 0.00000  | 0.00000  |
| 77  | C5 | DZZ | 0.00000  | 0.03758  | 0.00890  | 0.00000  | 0.00000  |
| 78  | C5 | DXY | 0.00000  | -0.00459 | -0.01108 | 0.00000  | 0.00000  |
| 79  | C5 | DXZ | -0.23893 | 0.00000  | 0.00000  | 0.01188  | -0.07217 |
| 80  | C5 | DYZ | -0.14357 | 0.00000  | 0.00000  | -0.16385 | -0.04011 |
| 81  | C6 | S   | 0.00000  | 0.00261  | -0.00881 | 0.00000  | 0.00000  |
| 82  | C6 | S   | 0.00000  | 0.01590  | -0.28440 | 0.00000  | 0.00000  |
| 83  | C6 | PX  | 0.00000  | 0.44602  | 0.07520  | 0.00000  | 0.00000  |
| 84  | C6 | PY  | 0.00000  | 0.07638  | -0.00344 | 0.00000  | 0.00000  |
| 85  | C6 | PZ  | -0.00017 | 0.00000  | 0.00000  | 0.01945  | -0.02190 |
| 86  | C6 | S   | 0.00000  | -0.83586 | 2.61537  | 0.00000  | 0.00000  |
| 87  | C6 | PX  | 0.00000  | -4.12073 | -1.14317 | 0.00000  | 0.00000  |
| 88  | C6 | PY  | 0.00000  | -1.31299 | -0.02725 | 0.00000  | 0.00000  |
| 89  | C6 | PZ  | -0.03445 | 0.00000  | 0.00000  | 0.00997  | 0.17687  |
| 90  | C6 | DXX | 0.00000  | -0.05847 | -0.01710 | 0.00000  | 0.00000  |
| 91  | C6 | DYY | 0.00000  | 0.06805  | 0.06494  | 0.00000  | 0.00000  |
| 92  | C6 | DZZ | 0.00000  | 0.00266  | -0.03797 | 0.00000  | 0.00000  |
| 93  | C6 | DXY | 0.00000  | -0.00211 | -0.00711 | 0.00000  | 0.00000  |
| 94  | C6 | DXZ | 0.31078  | 0.00000  | 0.00000  | -0.00408 | 0.01403  |
| 95  | C6 | DYZ | -0.10445 | 0.00000  | 0.00000  | 0.14200  | 0.17351  |
| 96  | C7 | S   | 0.00000  | -0.03367 | 0.00243  | 0.00000  | 0.00000  |
| 97  | C7 | S   | 0.00000  | -0.47307 | -0.02542 | 0.00000  | 0.00000  |
| 98  | C7 | PX  | 0.00000  | 0.02670  | 0.03286  | 0.00000  | 0.00000  |
| 99  | C7 | PY  | 0.00000  | -0.02595 | 0.15003  | 0.00000  | 0.00000  |
| 100 | C7 | PZ  | -0.08546 | 0.00000  | 0.00000  | 0.05583  | 0.00210  |
| 101 | C7 | S   | 0.00000  | 2.95027  | -0.16454 | 0.00000  | 0.00000  |
| 102 | C7 | PX  | 0.00000  | -1.97123 | -0.72901 | 0.00000  | 0.00000  |
| 103 | C7 | PY  | 0.00000  | 1.21623  | 1.31634  | 0.00000  | 0.00000  |
| 104 | C7 | PZ  | 0.12576  | 0.00000  | 0.00000  | 0.01426  | 0.02608  |
| 105 | C7 | DXX | 0.00000  | 0.02524  | 0.03164  | 0.00000  | 0.00000  |
| 106 | C7 | DYY | 0.00000  | -0.06441 | -0.03207 | 0.00000  | 0.00000  |
| 107 | C7 | DZZ | 0.00000  | 0.03761  | -0.00651 | 0.00000  | 0.00000  |
| 108 | C7 | DXY | 0.00000  | 0.03684  | -0.05798 | 0.00000  | 0.00000  |
| 109 | C7 | DXZ | -0.17653 | 0.00000  | 0.00000  | 0.20333  | 0.16607  |
| 110 | C7 | DYZ | 0.00947  | 0.00000  | 0.00000  | -0.00263 | 0.30802  |
| 111 | O1 | S   | 0.00000  | 0.00788  | 0.01135  | 0.00000  | 0.00000  |
| 112 | O1 | S   | 0.00000  | 0.08318  | 0.32579  | 0.00000  | 0.00000  |
| 113 | O1 | PX  | 0.00000  | -0.06796 | -0.32039 | 0.00000  | 0.00000  |
| 114 | O1 | PY  | 0.00000  | -0.11693 | -0.02427 | 0.00000  | 0.00000  |
| 115 | O1 | PZ  | 0.03363  | 0.00000  | 0.00000  | -0.00535 | -0.02675 |
| 116 | O1 | S   | 0.00000  | -0.39512 | -0.80203 | 0.00000  | 0.00000  |
| 117 | O1 | PX  | 0.00000  | 0.04954  | 0.54989  | 0.00000  | 0.00000  |
| 118 | O1 | PY  | 0.00000  | 0.52694  | -0.08493 | 0.00000  | 0.00000  |

|     |     |     |          |          |          |          |          |
|-----|-----|-----|----------|----------|----------|----------|----------|
| 119 | O1  | PZ  | -0.08111 | 0.00000  | 0.00000  | 0.03999  | 0.01845  |
| 120 | O1  | DXX | 0.00000  | 0.01944  | -0.05517 | 0.00000  | 0.00000  |
| 121 | O1  | DYY | 0.00000  | 0.03686  | 0.18331  | 0.00000  | 0.00000  |
| 122 | O1  | DZZ | 0.00000  | 0.01127  | 0.17000  | 0.00000  | 0.00000  |
| 123 | O1  | DXY | 0.00000  | 0.01406  | 0.09160  | 0.00000  | 0.00000  |
| 124 | O1  | DXZ | 0.09819  | 0.00000  | 0.00000  | 0.22434  | -0.06201 |
| 125 | O1  | DYZ | -0.01206 | 0.00000  | 0.00000  | 0.18480  | -0.11423 |
| 126 | H4  | S   | 0.00000  | -0.01906 | 0.01572  | 0.00000  | 0.00000  |
| 127 | H4  | S   | 0.00000  | 0.09988  | 0.14194  | 0.00000  | 0.00000  |
| 128 | H4  | PX  | 0.00000  | -0.00440 | 0.02638  | 0.00000  | 0.00000  |
| 129 | H4  | PY  | 0.00000  | -0.00847 | 0.04530  | 0.00000  | 0.00000  |
| 130 | H4  | PZ  | 0.02329  | 0.00000  | 0.00000  | -0.03184 | 0.01175  |
| 131 | N1  | S   | 0.00000  | 0.00499  | -0.00029 | 0.00000  | 0.00000  |
| 132 | N1  | S   | 0.00000  | -0.05220 | 0.19890  | 0.00000  | 0.00000  |
| 133 | N1  | PX  | 0.00000  | 0.15540  | -0.04241 | 0.00000  | 0.00000  |
| 134 | N1  | PY  | 0.00000  | 0.06462  | 0.18471  | 0.00000  | 0.00000  |
| 135 | N1  | PZ  | -0.08639 | 0.00000  | 0.00000  | 0.02514  | 0.11935  |
| 136 | N1  | S   | 0.00000  | 0.21684  | 0.09867  | 0.00000  | 0.00000  |
| 137 | N1  | PX  | 0.00000  | 1.07664  | 0.75849  | 0.00000  | 0.00000  |
| 138 | N1  | PY  | 0.00000  | -0.36650 | -1.34838 | 0.00000  | 0.00000  |
| 139 | N1  | PZ  | 0.10906  | 0.00000  | 0.00000  | 0.03950  | -0.21204 |
| 140 | N1  | DXX | 0.00000  | 0.01755  | 0.07674  | 0.00000  | 0.00000  |
| 141 | N1  | DYY | 0.00000  | -0.03361 | -0.00139 | 0.00000  | 0.00000  |
| 142 | N1  | DZZ | 0.00000  | -0.00920 | -0.00362 | 0.00000  | 0.00000  |
| 143 | N1  | DXY | 0.00000  | -0.03906 | 0.01802  | 0.00000  | 0.00000  |
| 144 | N1  | DXZ | 0.12709  | 0.00000  | 0.00000  | -0.04521 | 0.08837  |
| 145 | N1  | DYZ | 0.03649  | 0.00000  | 0.00000  | -0.10084 | -0.18932 |
| 146 | H6  | S   | 0.00000  | 0.44127  | -0.27131 | 0.00000  | 0.00000  |
| 147 | H6  | S   | 0.00000  | 0.64761  | -0.44334 | 0.00000  | 0.00000  |
| 148 | H6  | PX  | 0.00000  | -0.01031 | 0.00784  | 0.00000  | 0.00000  |
| 149 | H6  | PY  | 0.00000  | 0.01662  | 0.00692  | 0.00000  | 0.00000  |
| 150 | H6  | PZ  | 0.02663  | 0.00000  | 0.00000  | -0.09168 | -0.07751 |
| 151 | C8  | S   | 0.00000  | -0.00675 | -0.01918 | 0.00000  | 0.00000  |
| 152 | C8  | S   | 0.00000  | -0.25678 | -0.39393 | 0.00000  | 0.00000  |
| 153 | C8  | PX  | 0.00000  | -0.02738 | -0.28421 | 0.00000  | 0.00000  |
| 154 | C8  | PY  | 0.00000  | 0.49280  | -0.00613 | 0.00000  | 0.00000  |
| 155 | C8  | PZ  | 0.09840  | 0.00000  | 0.00000  | -0.02193 | -0.03054 |
| 156 | C8  | S   | 0.00000  | 1.66880  | 1.03196  | 0.00000  | 0.00000  |
| 157 | C8  | PX  | 0.00000  | 1.13347  | 2.67054  | 0.00000  | 0.00000  |
| 158 | C8  | PY  | 0.00000  | -5.16351 | -0.10548 | 0.00000  | 0.00000  |
| 159 | C8  | PZ  | -0.25281 | 0.00000  | 0.00000  | 0.00271  | 0.05986  |
| 160 | C8  | DXX | 0.00000  | 0.01707  | -0.07091 | 0.00000  | 0.00000  |
| 161 | C8  | DYY | 0.00000  | 0.00383  | 0.00527  | 0.00000  | 0.00000  |
| 162 | C8  | DZZ | 0.00000  | -0.02351 | 0.00752  | 0.00000  | 0.00000  |
| 163 | C8  | DXY | 0.00000  | -0.00380 | -0.01113 | 0.00000  | 0.00000  |
| 164 | C8  | DXZ | -0.05024 | 0.00000  | 0.00000  | -0.04037 | -0.30991 |
| 165 | C8  | DYZ | 0.17028  | 0.00000  | 0.00000  | -0.17197 | -0.29148 |
| 166 | H8  | S   | 0.00000  | 0.39283  | 0.27531  | 0.00000  | 0.00000  |
| 167 | H8  | S   | 0.00000  | 0.46221  | 0.29571  | 0.00000  | 0.00000  |
| 168 | H8  | PX  | 0.00000  | 0.04420  | 0.01949  | 0.00000  | 0.00000  |
| 169 | H8  | PY  | 0.00000  | 0.02648  | 0.00131  | 0.00000  | 0.00000  |
| 170 | H8  | PZ  | -0.05269 | 0.00000  | 0.00000  | 0.09510  | 0.06850  |
| 171 | C10 | S   | 0.00000  | 0.02675  | 0.00991  | 0.00000  | 0.00000  |
| 172 | C10 | S   | 0.00000  | 0.48292  | 0.22643  | 0.00000  | 0.00000  |



|     |     |     |          |          |          |          |          |
|-----|-----|-----|----------|----------|----------|----------|----------|
| 173 | C10 | PX  | 0.00000  | -0.10146 | -0.04485 | 0.00000  | 0.00000  |
| 174 | C10 | PY  | 0.00000  | -0.12374 | 0.01771  | 0.00000  | 0.00000  |
| 175 | C10 | PZ  | 0.03771  | 0.00000  | 0.00000  | -0.03569 | -0.07560 |
| 176 | C10 | S   | 0.00000  | -5.21792 | -1.18906 | 0.00000  | 0.00000  |
| 177 | C10 | PX  | 0.00000  | 1.00218  | -0.99507 | 0.00000  | 0.00000  |
| 178 | C10 | PY  | 0.00000  | -1.79957 | -0.68970 | 0.00000  | 0.00000  |
| 179 | C10 | PZ  | 0.08093  | 0.00000  | 0.00000  | 0.00039  | 0.02784  |
| 180 | C10 | DXX | 0.00000  | 0.11203  | 0.07041  | 0.00000  | 0.00000  |
| 181 | C10 | DYY | 0.00000  | -0.07848 | -0.04028 | 0.00000  | 0.00000  |
| 182 | C10 | DZZ | 0.00000  | 0.00462  | -0.00129 | 0.00000  | 0.00000  |
| 183 | C10 | DXY | 0.00000  | 0.09450  | -0.05431 | 0.00000  | 0.00000  |
| 184 | C10 | DXZ | 0.02290  | 0.00000  | 0.00000  | -0.06703 | -0.24496 |
| 185 | C10 | DYZ | -0.12798 | 0.00000  | 0.00000  | 0.10269  | 0.13597  |
| 186 | H16 | S   | 0.00000  | -0.02979 | 0.22555  | 0.00000  | 0.00000  |
| 187 | H16 | S   | 0.00000  | -0.09285 | 0.35553  | 0.00000  | 0.00000  |
| 188 | H16 | PX  | 0.00000  | 0.00215  | 0.01012  | 0.00000  | 0.00000  |
| 189 | H16 | PY  | 0.00000  | 0.03988  | -0.01138 | 0.00000  | 0.00000  |
| 190 | H16 | PZ  | 0.03855  | 0.00000  | 0.00000  | -0.04625 | -0.12173 |
| 191 | H18 | S   | 0.00000  | 0.16163  | -0.18783 | 0.00000  | 0.00000  |
| 192 | H18 | S   | 0.00000  | 0.32557  | -0.26038 | 0.00000  | 0.00000  |
| 193 | H18 | PX  | 0.00000  | 0.01469  | 0.00827  | 0.00000  | 0.00000  |
| 194 | H18 | PY  | 0.00000  | 0.03037  | 0.02777  | 0.00000  | 0.00000  |
| 195 | H18 | PZ  | 0.03894  | 0.00000  | 0.00000  | -0.01582 | 0.02604  |
| 196 | C9  | S   | 0.00000  | 0.01583  | -0.07446 | 0.00000  | 0.00000  |
| 197 | C9  | S   | 0.00000  | 0.15677  | -0.86602 | 0.00000  | 0.00000  |
| 198 | C9  | PX  | 0.00000  | -0.00084 | 0.14417  | 0.00000  | 0.00000  |
| 199 | C9  | PY  | 0.00000  | 0.02899  | 0.12143  | 0.00000  | 0.00000  |
| 200 | C9  | PZ  | -0.02747 | 0.00000  | 0.00000  | -0.09547 | 0.03879  |
| 201 | C9  | S   | 0.00000  | -0.65592 | 2.03324  | 0.00000  | 0.00000  |
| 202 | C9  | PX  | 0.00000  | 0.23361  | -0.10311 | 0.00000  | 0.00000  |
| 203 | C9  | PY  | 0.00000  | 0.02708  | -0.38281 | 0.00000  | 0.00000  |
| 204 | C9  | PZ  | 0.08071  | 0.00000  | 0.00000  | 0.07012  | -0.03646 |
| 205 | C9  | DXX | 0.00000  | -0.00470 | 0.04141  | 0.00000  | 0.00000  |
| 206 | C9  | DYY | 0.00000  | 0.01423  | -0.09504 | 0.00000  | 0.00000  |
| 207 | C9  | DZZ | 0.00000  | -0.00133 | -0.13518 | 0.00000  | 0.00000  |
| 208 | C9  | DXY | 0.00000  | -0.04078 | -0.16760 | 0.00000  | 0.00000  |
| 209 | C9  | DXZ | -0.01109 | 0.00000  | 0.00000  | -0.18024 | 0.08911  |
| 210 | C9  | DYZ | -0.08439 | 0.00000  | 0.00000  | -0.31562 | 0.11805  |
| 211 | H3  | S   | 0.00000  | 0.05394  | -0.17260 | 0.00000  | 0.00000  |
| 212 | H3  | S   | 0.00000  | 0.09573  | -0.15368 | 0.00000  | 0.00000  |
| 213 | H3  | PX  | 0.00000  | -0.01687 | -0.06643 | 0.00000  | 0.00000  |
| 214 | H3  | PY  | 0.00000  | -0.00688 | -0.02551 | 0.00000  | 0.00000  |
| 215 | H3  | PZ  | -0.03139 | 0.00000  | 0.00000  | -0.12400 | 0.04508  |
| 216 | H5  | S   | -0.03411 | 0.05138  | -0.31806 | -0.05220 | 0.01346  |
| 217 | H5  | S   | 0.10458  | 0.02931  | -0.25321 | 0.05400  | -0.00641 |
| 218 | H5  | PX  | 0.00671  | 0.00335  | 0.02968  | 0.04712  | -0.02090 |
| 219 | H5  | PY  | 0.02557  | -0.01017 | -0.04046 | 0.11720  | -0.04792 |
| 220 | H5  | PZ  | -0.00093 | 0.00308  | 0.05033  | 0.01370  | -0.00840 |
| 221 | H7  | S   | 0.03411  | 0.05138  | -0.31806 | 0.05220  | -0.01346 |
| 222 | H7  | S   | -0.10458 | 0.02931  | -0.25321 | -0.05400 | 0.00641  |
| 223 | H7  | PX  | -0.00671 | 0.00335  | 0.02968  | -0.04712 | 0.02090  |
| 224 | H7  | PY  | -0.02557 | -0.01017 | -0.04046 | -0.11720 | 0.04792  |
| 225 | H7  | PZ  | -0.00093 | -0.00308 | -0.05033 | 0.01370  | -0.00840 |

|              |          |          |          |          |          |
|--------------|----------|----------|----------|----------|----------|
| MO:          | 121      | 122      | 123      | 124      | 125      |
| Eigenvalues: | 1.59404  | 1.61346  | 1.61640  | 1.62192  | 1.65269  |
| (ev):        | 43.37592 | 43.90445 | 43.98446 | 44.13471 | 44.97201 |

|    |    | A   | A        | A        | A        | A        |          |
|----|----|-----|----------|----------|----------|----------|----------|
| 1  | H1 | S   | 0.09575  | 0.00000  | 0.00000  | 0.19006  | 0.00000  |
| 2  | H1 | S   | 0.37753  | 0.00000  | 0.00000  | 0.33977  | 0.00000  |
| 3  | H1 | PX  | 0.00275  | 0.00000  | 0.00000  | 0.00030  | 0.00000  |
| 4  | H1 | PY  | 0.01825  | 0.00000  | 0.00000  | 0.02519  | 0.00000  |
| 5  | H1 | PZ  | 0.00000  | 0.08068  | -0.03023 | 0.00000  | 0.05313  |
| 6  | C1 | S   | 0.00474  | 0.00000  | 0.00000  | -0.02553 | 0.00000  |
| 7  | C1 | S   | 0.07641  | 0.00000  | 0.00000  | -0.61363 | 0.00000  |
| 8  | C1 | PX  | -0.00689 | 0.00000  | 0.00000  | 0.13378  | 0.00000  |
| 9  | C1 | PY  | -0.15941 | 0.00000  | 0.00000  | 0.34206  | 0.00000  |
| 10 | C1 | PZ  | 0.00000  | 0.04663  | 0.00865  | 0.00000  | 0.04059  |
| 11 | C1 | S   | 0.81296  | 0.00000  | 0.00000  | 2.67700  | 0.00000  |
| 12 | C1 | PX  | -1.32952 | 0.00000  | 0.00000  | -2.02282 | 0.00000  |
| 13 | C1 | PY  | 1.06198  | 0.00000  | 0.00000  | 0.78028  | 0.00000  |
| 14 | C1 | PZ  | 0.00000  | 0.03317  | -0.14884 | 0.00000  | -0.02787 |
| 15 | C1 | DXX | 0.02690  | 0.00000  | 0.00000  | 0.00844  | 0.00000  |
| 16 | C1 | DYY | -0.02672 | 0.00000  | 0.00000  | -0.05480 | 0.00000  |
| 17 | C1 | DZZ | 0.02604  | 0.00000  | 0.00000  | 0.01063  | 0.00000  |
| 18 | C1 | DXY | 0.02899  | 0.00000  | 0.00000  | -0.02796 | 0.00000  |
| 19 | C1 | DXZ | 0.00000  | 0.12198  | -0.03284 | 0.00000  | 0.10268  |
| 20 | C1 | DYZ | 0.00000  | 0.11215  | 0.10835  | 0.00000  | 0.03693  |
| 21 | C2 | S   | -0.03994 | 0.00000  | 0.00000  | -0.01722 | 0.00000  |
| 22 | C2 | S   | -0.42550 | 0.00000  | 0.00000  | -0.24960 | 0.00000  |
| 23 | C2 | PX  | 0.11652  | 0.00000  | 0.00000  | 0.00965  | 0.00000  |
| 24 | C2 | PY  | -0.26918 | 0.00000  | 0.00000  | -0.08074 | 0.00000  |
| 25 | C2 | PZ  | 0.00000  | 0.00944  | 0.06114  | 0.00000  | -0.13061 |
| 26 | C2 | S   | 3.98461  | 0.00000  | 0.00000  | 1.62680  | 0.00000  |
| 27 | C2 | PX  | 0.88766  | 0.00000  | 0.00000  | 1.75042  | 0.00000  |
| 28 | C2 | PY  | -0.70818 | 0.00000  | 0.00000  | -0.33118 | 0.00000  |
| 29 | C2 | PZ  | 0.00000  | 0.01936  | -0.13113 | 0.00000  | 0.13479  |
| 30 | C2 | DXX | -0.07065 | 0.00000  | 0.00000  | 0.06191  | 0.00000  |
| 31 | C2 | DYY | 0.02613  | 0.00000  | 0.00000  | -0.07212 | 0.00000  |
| 32 | C2 | DZZ | 0.06334  | 0.00000  | 0.00000  | 0.01756  | 0.00000  |
| 33 | C2 | DXY | -0.05533 | 0.00000  | 0.00000  | -0.05481 | 0.00000  |
| 34 | C2 | DXZ | 0.00000  | 0.08080  | -0.12659 | 0.00000  | 0.31113  |
| 35 | C2 | DYZ | 0.00000  | -0.21229 | -0.07953 | 0.00000  | 0.29282  |
| 36 | C3 | S   | -0.02335 | 0.00000  | 0.00000  | 0.00334  | 0.00000  |
| 37 | C3 | S   | -0.66182 | 0.00000  | 0.00000  | -0.05597 | 0.00000  |
| 38 | C3 | PX  | -0.12925 | 0.00000  | 0.00000  | -0.20781 | 0.00000  |
| 39 | C3 | PY  | 0.14171  | 0.00000  | 0.00000  | -0.02446 | 0.00000  |
| 40 | C3 | PZ  | 0.00000  | 0.00621  | -0.07787 | 0.00000  | -0.00718 |
| 41 | C3 | S   | 1.77081  | 0.00000  | 0.00000  | -0.86062 | 0.00000  |
| 42 | C3 | PX  | 2.10930  | 0.00000  | 0.00000  | -0.16274 | 0.00000  |
| 43 | C3 | PY  | -0.80570 | 0.00000  | 0.00000  | 2.05898  | 0.00000  |
| 44 | C3 | PZ  | 0.00000  | -0.09981 | 0.21609  | 0.00000  | 0.05309  |
| 45 | C3 | DXX | -0.10731 | 0.00000  | 0.00000  | 0.02896  | 0.00000  |
| 46 | C3 | DYY | 0.00512  | 0.00000  | 0.00000  | -0.05203 | 0.00000  |
| 47 | C3 | DZZ | 0.03197  | 0.00000  | 0.00000  | -0.00274 | 0.00000  |
| 48 | C3 | DXY | -0.07846 | 0.00000  | 0.00000  | 0.00088  | 0.00000  |
| 49 | C3 | DXZ | 0.00000  | 0.19361  | 0.26701  | 0.00000  | 0.10823  |

|     |    |     |          |          |          |          |          |
|-----|----|-----|----------|----------|----------|----------|----------|
| 50  | C3 | DYZ | 0.00000  | -0.25568 | -0.14257 | 0.00000  | -0.11419 |
| 51  | C4 | S   | 0.00550  | 0.00000  | 0.00000  | 0.02325  | 0.00000  |
| 52  | C4 | S   | 0.10796  | 0.00000  | 0.00000  | 0.57120  | 0.00000  |
| 53  | C4 | PX  | -0.05979 | 0.00000  | 0.00000  | 0.17627  | 0.00000  |
| 54  | C4 | PY  | -0.16301 | 0.00000  | 0.00000  | 0.00920  | 0.00000  |
| 55  | C4 | PZ  | 0.00000  | 0.02397  | -0.04088 | 0.00000  | 0.02167  |
| 56  | C4 | S   | -0.74268 | 0.00000  | 0.00000  | -3.44493 | 0.00000  |
| 57  | C4 | PX  | -0.79513 | 0.00000  | 0.00000  | -2.11494 | 0.00000  |
| 58  | C4 | PY  | 1.59422  | 0.00000  | 0.00000  | 1.48722  | 0.00000  |
| 59  | C4 | PZ  | 0.00000  | -0.05492 | 0.15044  | 0.00000  | -0.08939 |
| 60  | C4 | DXX | -0.05759 | 0.00000  | 0.00000  | 0.02869  | 0.00000  |
| 61  | C4 | DYY | 0.06716  | 0.00000  | 0.00000  | -0.04689 | 0.00000  |
| 62  | C4 | DZZ | 0.03492  | 0.00000  | 0.00000  | 0.02972  | 0.00000  |
| 63  | C4 | DXY | 0.02864  | 0.00000  | 0.00000  | 0.04213  | 0.00000  |
| 64  | C4 | DXZ | 0.00000  | -0.18199 | 0.17558  | 0.00000  | -0.05776 |
| 65  | C4 | DYZ | 0.00000  | -0.19898 | 0.01242  | 0.00000  | -0.05699 |
| 66  | C5 | S   | 0.00593  | 0.00000  | 0.00000  | -0.00790 | 0.00000  |
| 67  | C5 | S   | 0.29171  | 0.00000  | 0.00000  | -0.27414 | 0.00000  |
| 68  | C5 | PX  | -0.02978 | 0.00000  | 0.00000  | 0.03791  | 0.00000  |
| 69  | C5 | PY  | -0.08931 | 0.00000  | 0.00000  | 0.23805  | 0.00000  |
| 70  | C5 | PZ  | 0.00000  | -0.02999 | 0.02586  | 0.00000  | -0.12164 |
| 71  | C5 | S   | -1.23552 | 0.00000  | 0.00000  | -0.26385 | 0.00000  |
| 72  | C5 | PX  | 0.14771  | 0.00000  | 0.00000  | -0.08808 | 0.00000  |
| 73  | C5 | PY  | 0.08422  | 0.00000  | 0.00000  | -1.53091 | 0.00000  |
| 74  | C5 | PZ  | 0.00000  | 0.07151  | 0.02509  | 0.00000  | 0.07037  |
| 75  | C5 | DXX | 0.01089  | 0.00000  | 0.00000  | 0.01515  | 0.00000  |
| 76  | C5 | DYY | -0.08443 | 0.00000  | 0.00000  | -0.02825 | 0.00000  |
| 77  | C5 | DZZ | 0.08840  | 0.00000  | 0.00000  | 0.01831  | 0.00000  |
| 78  | C5 | DXY | -0.03279 | 0.00000  | 0.00000  | -0.03576 | 0.00000  |
| 79  | C5 | DXZ | 0.00000  | 0.27326  | -0.17727 | 0.00000  | 0.20991  |
| 80  | C5 | DYZ | 0.00000  | 0.11413  | 0.10400  | 0.00000  | -0.42656 |
| 81  | C6 | S   | -0.02462 | 0.00000  | 0.00000  | 0.01870  | 0.00000  |
| 82  | C6 | S   | -0.01856 | 0.00000  | 0.00000  | 0.51618  | 0.00000  |
| 83  | C6 | PX  | -0.33853 | 0.00000  | 0.00000  | 0.01425  | 0.00000  |
| 84  | C6 | PY  | 0.05950  | 0.00000  | 0.00000  | 0.39563  | 0.00000  |
| 85  | C6 | PZ  | 0.00000  | 0.02933  | -0.06391 | 0.00000  | 0.04874  |
| 86  | C6 | S   | -1.50151 | 0.00000  | 0.00000  | -0.34211 | 0.00000  |
| 87  | C6 | PX  | 4.29752  | 0.00000  | 0.00000  | 0.69139  | 0.00000  |
| 88  | C6 | PY  | -0.52547 | 0.00000  | 0.00000  | -4.58544 | 0.00000  |
| 89  | C6 | PZ  | 0.00000  | -0.02343 | 0.10147  | 0.00000  | -0.19072 |
| 90  | C6 | DXX | -0.04510 | 0.00000  | 0.00000  | 0.05809  | 0.00000  |
| 91  | C6 | DYY | -0.13249 | 0.00000  | 0.00000  | 0.05911  | 0.00000  |
| 92  | C6 | DZZ | 0.12138  | 0.00000  | 0.00000  | -0.01036 | 0.00000  |
| 93  | C6 | DXY | -0.04779 | 0.00000  | 0.00000  | -0.00634 | 0.00000  |
| 94  | C6 | DXZ | 0.00000  | -0.12372 | -0.23039 | 0.00000  | -0.04035 |
| 95  | C6 | DYZ | 0.00000  | 0.00782  | -0.23515 | 0.00000  | -0.01556 |
| 96  | C7 | S   | 0.04294  | 0.00000  | 0.00000  | 0.01093  | 0.00000  |
| 97  | C7 | S   | 0.87913  | 0.00000  | 0.00000  | 0.15276  | 0.00000  |
| 98  | C7 | PX  | -0.30296 | 0.00000  | 0.00000  | -0.06227 | 0.00000  |
| 99  | C7 | PY  | 0.05853  | 0.00000  | 0.00000  | 0.18749  | 0.00000  |
| 100 | C7 | PZ  | 0.00000  | -0.12939 | -0.03763 | 0.00000  | -0.06717 |
| 101 | C7 | S   | -3.17298 | 0.00000  | 0.00000  | -0.36802 | 0.00000  |
| 102 | C7 | PX  | 1.66306  | 0.00000  | 0.00000  | -1.02146 | 0.00000  |
| 103 | C7 | PY  | -1.08869 | 0.00000  | 0.00000  | 1.49627  | 0.00000  |

|     |    |     |          |          |          |          |          |
|-----|----|-----|----------|----------|----------|----------|----------|
| 104 | C7 | PZ  | 0.00000  | 0.11411  | -0.10983 | 0.00000  | 0.03266  |
| 105 | C7 | DXX | 0.01359  | 0.00000  | 0.00000  | 0.08682  | 0.00000  |
| 106 | C7 | DYY | 0.07803  | 0.00000  | 0.00000  | -0.01212 | 0.00000  |
| 107 | C7 | DZZ | -0.02225 | 0.00000  | 0.00000  | -0.02495 | 0.00000  |
| 108 | C7 | DXY | 0.06458  | 0.00000  | 0.00000  | -0.03009 | 0.00000  |
| 109 | C7 | DXZ | 0.00000  | -0.23926 | -0.09780 | 0.00000  | -0.16006 |
| 110 | C7 | DYZ | 0.00000  | 0.21556  | 0.19637  | 0.00000  | 0.03836  |
| 111 | O1 | S   | 0.01245  | 0.00000  | 0.00000  | -0.00651 | 0.00000  |
| 112 | O1 | S   | 0.24692  | 0.00000  | 0.00000  | -0.32537 | 0.00000  |
| 113 | O1 | PX  | -0.15803 | 0.00000  | 0.00000  | 0.05196  | 0.00000  |
| 114 | O1 | PY  | -0.12095 | 0.00000  | 0.00000  | 0.22619  | 0.00000  |
| 115 | O1 | PZ  | 0.00000  | 0.08026  | 0.08117  | 0.00000  | -0.09152 |
| 116 | O1 | S   | -0.81533 | 0.00000  | 0.00000  | 0.40048  | 0.00000  |
| 117 | O1 | PX  | 0.65286  | 0.00000  | 0.00000  | 0.01762  | 0.00000  |
| 118 | O1 | PY  | 0.62486  | 0.00000  | 0.00000  | -0.49346 | 0.00000  |
| 119 | O1 | PZ  | 0.00000  | -0.09829 | -0.18473 | 0.00000  | 0.21018  |
| 120 | O1 | DXX | 0.00870  | 0.00000  | 0.00000  | -0.08860 | 0.00000  |
| 121 | O1 | DYY | 0.08699  | 0.00000  | 0.00000  | -0.12674 | 0.00000  |
| 122 | O1 | DZZ | 0.10222  | 0.00000  | 0.00000  | -0.01333 | 0.00000  |
| 123 | O1 | DXY | 0.04579  | 0.00000  | 0.00000  | -0.04422 | 0.00000  |
| 124 | O1 | DXZ | 0.00000  | 0.09742  | 0.11261  | 0.00000  | -0.11148 |
| 125 | O1 | DYZ | 0.00000  | 0.18084  | -0.02053 | 0.00000  | 0.04013  |
| 126 | H4 | S   | 0.09353  | 0.00000  | 0.00000  | 0.27617  | 0.00000  |
| 127 | H4 | S   | 0.24432  | 0.00000  | 0.00000  | 0.36697  | 0.00000  |
| 128 | H4 | PX  | 0.01284  | 0.00000  | 0.00000  | -0.01635 | 0.00000  |
| 129 | H4 | PY  | 0.02368  | 0.00000  | 0.00000  | -0.00541 | 0.00000  |
| 130 | H4 | PZ  | 0.00000  | -0.03392 | 0.10175  | 0.00000  | -0.21909 |
| 131 | N1 | S   | 0.01768  | 0.00000  | 0.00000  | -0.01095 | 0.00000  |
| 132 | N1 | S   | 0.22352  | 0.00000  | 0.00000  | -0.16738 | 0.00000  |
| 133 | N1 | PX  | 0.28947  | 0.00000  | 0.00000  | -0.05972 | 0.00000  |
| 134 | N1 | PY  | -0.30668 | 0.00000  | 0.00000  | -0.13101 | 0.00000  |
| 135 | N1 | PZ  | 0.00000  | 0.00957  | 0.01985  | 0.00000  | -0.03010 |
| 136 | N1 | S   | -0.72675 | 0.00000  | 0.00000  | -0.00524 | 0.00000  |
| 137 | N1 | PX  | -2.05956 | 0.00000  | 0.00000  | 1.10488  | 0.00000  |
| 138 | N1 | PY  | 1.97029  | 0.00000  | 0.00000  | -1.52354 | 0.00000  |
| 139 | N1 | PZ  | 0.00000  | -0.09672 | -0.09268 | 0.00000  | 0.15308  |
| 140 | N1 | DXX | 0.06950  | 0.00000  | 0.00000  | 0.03105  | 0.00000  |
| 141 | N1 | DYY | 0.04567  | 0.00000  | 0.00000  | -0.10394 | 0.00000  |
| 142 | N1 | DZZ | 0.01829  | 0.00000  | 0.00000  | -0.00233 | 0.00000  |
| 143 | N1 | DXY | -0.01297 | 0.00000  | 0.00000  | -0.02197 | 0.00000  |
| 144 | N1 | DXZ | 0.00000  | 0.13890  | -0.22683 | 0.00000  | -0.14300 |
| 145 | N1 | DYZ | 0.00000  | -0.03000 | 0.19902  | 0.00000  | 0.05750  |
| 146 | H6 | S   | -0.08203 | 0.00000  | 0.00000  | 0.22272  | 0.00000  |
| 147 | H6 | S   | -0.09791 | 0.00000  | 0.00000  | 0.41118  | 0.00000  |
| 148 | H6 | PX  | -0.01508 | 0.00000  | 0.00000  | -0.02603 | 0.00000  |
| 149 | H6 | PY  | 0.01849  | 0.00000  | 0.00000  | 0.00146  | 0.00000  |
| 150 | H6 | PZ  | 0.00000  | 0.00839  | 0.03933  | 0.00000  | -0.17751 |
| 151 | C8 | S   | -0.00598 | 0.00000  | 0.00000  | 0.00363  | 0.00000  |
| 152 | C8 | S   | -0.33847 | 0.00000  | 0.00000  | -0.10439 | 0.00000  |
| 153 | C8 | PX  | -0.14843 | 0.00000  | 0.00000  | -0.42052 | 0.00000  |
| 154 | C8 | PY  | 0.24590  | 0.00000  | 0.00000  | -0.12760 | 0.00000  |
| 155 | C8 | PZ  | 0.00000  | -0.00025 | 0.00206  | 0.00000  | 0.01487  |
| 156 | C8 | S   | 4.66409  | 0.00000  | 0.00000  | -0.46778 | 0.00000  |
| 157 | C8 | PX  | -0.48555 | 0.00000  | 0.00000  | 4.19037  | 0.00000  |

|     |     |     |          |          |          |          |          |
|-----|-----|-----|----------|----------|----------|----------|----------|
| 158 | C8  | PY  | -2.42023 | 0.00000  | 0.00000  | -0.61509 | 0.00000  |
| 159 | C8  | PZ  | 0.00000  | 0.05116  | 0.03948  | 0.00000  | -0.05813 |
| 160 | C8  | DXX | 0.13408  | 0.00000  | 0.00000  | -0.03253 | 0.00000  |
| 161 | C8  | DYY | 0.00970  | 0.00000  | 0.00000  | 0.00243  | 0.00000  |
| 162 | C8  | DZZ | -0.05847 | 0.00000  | 0.00000  | -0.00483 | 0.00000  |
| 163 | C8  | DXY | -0.00296 | 0.00000  | 0.00000  | 0.02288  | 0.00000  |
| 164 | C8  | DXZ | 0.00000  | -0.18830 | 0.21489  | 0.00000  | 0.17922  |
| 165 | C8  | DYZ | 0.00000  | 0.14818  | -0.24245 | 0.00000  | -0.00763 |
| 166 | H8  | S   | -0.05948 | 0.00000  | 0.00000  | 0.28969  | 0.00000  |
| 167 | H8  | S   | -0.37519 | 0.00000  | 0.00000  | 0.46272  | 0.00000  |
| 168 | H8  | PX  | 0.00688  | 0.00000  | 0.00000  | 0.03794  | 0.00000  |
| 169 | H8  | PY  | 0.00949  | 0.00000  | 0.00000  | 0.02801  | 0.00000  |
| 170 | H8  | PZ  | 0.00000  | -0.11371 | -0.09007 | 0.00000  | -0.08871 |
| 171 | C10 | S   | 0.02357  | 0.00000  | 0.00000  | 0.00379  | 0.00000  |
| 172 | C10 | S   | 0.20734  | 0.00000  | 0.00000  | -0.05387 | 0.00000  |
| 173 | C10 | PX  | 0.17708  | 0.00000  | 0.00000  | 0.04937  | 0.00000  |
| 174 | C10 | PY  | -0.16403 | 0.00000  | 0.00000  | -0.08448 | 0.00000  |
| 175 | C10 | PZ  | 0.00000  | 0.05374  | -0.12503 | 0.00000  | -0.01707 |
| 176 | C10 | S   | -3.47738 | 0.00000  | 0.00000  | -0.90100 | 0.00000  |
| 177 | C10 | PX  | -0.13079 | 0.00000  | 0.00000  | -2.01979 | 0.00000  |
| 178 | C10 | PY  | -1.27698 | 0.00000  | 0.00000  | -0.72432 | 0.00000  |
| 179 | C10 | PZ  | 0.00000  | -0.04213 | 0.08305  | 0.00000  | 0.02400  |
| 180 | C10 | DXX | 0.05661  | 0.00000  | 0.00000  | 0.06576  | 0.00000  |
| 181 | C10 | DYY | -0.10340 | 0.00000  | 0.00000  | -0.05031 | 0.00000  |
| 182 | C10 | DZZ | 0.02859  | 0.00000  | 0.00000  | -0.01399 | 0.00000  |
| 183 | C10 | DXY | 0.00768  | 0.00000  | 0.00000  | -0.11250 | 0.00000  |
| 184 | C10 | DXZ | 0.00000  | -0.05821 | 0.07444  | 0.00000  | 0.17803  |
| 185 | C10 | DYZ | 0.00000  | -0.16112 | 0.29843  | 0.00000  | 0.08638  |
| 186 | H16 | S   | 0.20316  | 0.00000  | 0.00000  | 0.35243  | 0.00000  |
| 187 | H16 | S   | 0.24297  | 0.00000  | 0.00000  | 0.66018  | 0.00000  |
| 188 | H16 | PX  | -0.03008 | 0.00000  | 0.00000  | 0.00646  | 0.00000  |
| 189 | H16 | PY  | -0.00974 | 0.00000  | 0.00000  | -0.02432 | 0.00000  |
| 190 | H16 | PZ  | 0.00000  | 0.00571  | -0.01791 | 0.00000  | 0.06747  |
| 191 | H18 | S   | 0.02753  | 0.00000  | 0.00000  | -0.36491 | 0.00000  |
| 192 | H18 | S   | -0.05436 | 0.00000  | 0.00000  | -0.61253 | 0.00000  |
| 193 | H18 | PX  | -0.02509 | 0.00000  | 0.00000  | -0.00506 | 0.00000  |
| 194 | H18 | PY  | 0.02110  | 0.00000  | 0.00000  | 0.03963  | 0.00000  |
| 195 | H18 | PZ  | 0.00000  | 0.06861  | -0.11634 | 0.00000  | -0.08782 |
| 196 | C9  | S   | 0.02099  | 0.00000  | 0.00000  | -0.01785 | 0.00000  |
| 197 | C9  | S   | 0.24938  | 0.00000  | 0.00000  | -0.19406 | 0.00000  |
| 198 | C9  | PX  | 0.07987  | 0.00000  | 0.00000  | -0.02146 | 0.00000  |
| 199 | C9  | PY  | -0.10217 | 0.00000  | 0.00000  | 0.10038  | 0.00000  |
| 200 | C9  | PZ  | 0.00000  | -0.07901 | -0.02089 | 0.00000  | 0.03135  |
| 201 | C9  | S   | -0.99438 | 0.00000  | 0.00000  | 0.50418  | 0.00000  |
| 202 | C9  | PX  | 0.15071  | 0.00000  | 0.00000  | -0.02249 | 0.00000  |
| 203 | C9  | PY  | 0.48180  | 0.00000  | 0.00000  | -0.37956 | 0.00000  |
| 204 | C9  | PZ  | 0.00000  | 0.15109  | 0.10365  | 0.00000  | -0.15807 |
| 205 | C9  | DXX | 0.03950  | 0.00000  | 0.00000  | -0.08100 | 0.00000  |
| 206 | C9  | DYY | -0.03588 | 0.00000  | 0.00000  | 0.00994  | 0.00000  |
| 207 | C9  | DZZ | 0.00458  | 0.00000  | 0.00000  | 0.05416  | 0.00000  |
| 208 | C9  | DXY | -0.12616 | 0.00000  | 0.00000  | 0.10487  | 0.00000  |
| 209 | C9  | DXZ | 0.00000  | -0.12700 | -0.04172 | 0.00000  | 0.04991  |
| 210 | C9  | DYZ | 0.00000  | -0.19626 | -0.09076 | 0.00000  | 0.10099  |
| 211 | H3  | S   | 0.07140  | 0.00000  | 0.00000  | -0.00130 | 0.00000  |

|     |    |    |          |          |          |          |          |
|-----|----|----|----------|----------|----------|----------|----------|
| 212 | H3 | S  | -0.11404 | 0.00000  | 0.00000  | 0.14681  | 0.00000  |
| 213 | H3 | PX | -0.06477 | 0.00000  | 0.00000  | 0.07705  | 0.00000  |
| 214 | H3 | PY | 0.00572  | 0.00000  | 0.00000  | 0.00484  | 0.00000  |
| 215 | H3 | PZ | 0.00000  | -0.07445 | -0.02772 | 0.00000  | 0.02531  |
| 216 | H5 | S  | 0.12546  | -0.04399 | 0.00366  | -0.08564 | -0.00742 |
| 217 | H5 | S  | 0.09300  | 0.10690  | 0.04996  | -0.08509 | -0.08160 |
| 218 | H5 | PX | 0.01502  | 0.03259  | 0.01346  | -0.03284 | -0.01971 |
| 219 | H5 | PY | -0.00360 | 0.07551  | 0.02630  | 0.00023  | -0.03387 |
| 220 | H5 | PZ | 0.01961  | 0.01051  | 0.00471  | -0.02299 | -0.00702 |
| 221 | H7 | S  | 0.12546  | 0.04399  | -0.00366 | -0.08564 | 0.00742  |
| 222 | H7 | S  | 0.09300  | -0.10690 | -0.04996 | -0.08509 | 0.08160  |
| 223 | H7 | PX | 0.01502  | -0.03259 | -0.01346 | -0.03284 | 0.01971  |
| 224 | H7 | PY | -0.00360 | -0.07551 | -0.02630 | 0.00023  | 0.03387  |
| 225 | H7 | PZ | -0.01961 | 0.01051  | 0.00471  | 0.02299  | -0.00702 |

|              |          |          |          |          |          |
|--------------|----------|----------|----------|----------|----------|
| MO:          | 126      | 127      | 128      | 129      | 130      |
| Eigenvalues: | 1.66549  | 1.68081  | 1.68528  | 1.70352  | 1.71993  |
| (ev):        | 45.32025 | 45.73720 | 45.85883 | 46.35520 | 46.80183 |

|    |    | A   | A        | A        | A        | A        |          |
|----|----|-----|----------|----------|----------|----------|----------|
| 1  | H1 | S   | 0.16851  | 0.00000  | 0.55819  | 0.00000  | 0.00000  |
| 2  | H1 | S   | 0.18463  | 0.00000  | 1.07200  | 0.00000  | 0.00000  |
| 3  | H1 | PX  | -0.01046 | 0.00000  | 0.02693  | 0.00000  | 0.00000  |
| 4  | H1 | PY  | 0.02803  | 0.00000  | 0.01841  | 0.00000  | 0.00000  |
| 5  | H1 | PZ  | 0.00000  | -0.03610 | 0.00000  | 0.04791  | -0.15354 |
| 6  | C1 | S   | 0.04540  | 0.00000  | -0.00356 | 0.00000  | 0.00000  |
| 7  | C1 | S   | 0.76507  | 0.00000  | -0.26109 | 0.00000  | 0.00000  |
| 8  | C1 | PX  | -0.05190 | 0.00000  | 0.18168  | 0.00000  | 0.00000  |
| 9  | C1 | PY  | -0.13805 | 0.00000  | -0.00799 | 0.00000  | 0.00000  |
| 10 | C1 | PZ  | 0.00000  | 0.01762  | 0.00000  | 0.00043  | -0.16004 |
| 11 | C1 | S   | -5.05081 | 0.00000  | -0.31330 | 0.00000  | 0.00000  |
| 12 | C1 | PX  | 0.41693  | 0.00000  | -2.97723 | 0.00000  | 0.00000  |
| 13 | C1 | PY  | 1.27707  | 0.00000  | 0.62287  | 0.00000  | 0.00000  |
| 14 | C1 | PZ  | 0.00000  | -0.15417 | 0.00000  | 0.04643  | 0.24269  |
| 15 | C1 | DXX | 0.05354  | 0.00000  | 0.09130  | 0.00000  | 0.00000  |
| 16 | C1 | DYY | 0.05468  | 0.00000  | -0.10491 | 0.00000  | 0.00000  |
| 17 | C1 | DZZ | -0.06250 | 0.00000  | 0.02380  | 0.00000  | 0.00000  |
| 18 | C1 | DXY | 0.07426  | 0.00000  | 0.04491  | 0.00000  | 0.00000  |
| 19 | C1 | DXZ | 0.00000  | 0.00019  | 0.00000  | -0.02568 | -0.36026 |
| 20 | C1 | DYZ | 0.00000  | 0.00305  | 0.00000  | 0.22613  | 0.06477  |
| 21 | C2 | S   | 0.02364  | 0.00000  | -0.01561 | 0.00000  | 0.00000  |
| 22 | C2 | S   | 0.48565  | 0.00000  | -0.43786 | 0.00000  | 0.00000  |
| 23 | C2 | PX  | 0.03204  | 0.00000  | -0.19584 | 0.00000  | 0.00000  |
| 24 | C2 | PY  | 0.15841  | 0.00000  | 0.05151  | 0.00000  | 0.00000  |
| 25 | C2 | PZ  | 0.00000  | -0.09710 | 0.00000  | 0.04184  | -0.03846 |
| 26 | C2 | S   | -2.29989 | 0.00000  | 1.56749  | 0.00000  | 0.00000  |
| 27 | C2 | PX  | -1.62578 | 0.00000  | 1.99916  | 0.00000  | 0.00000  |
| 28 | C2 | PY  | -0.66699 | 0.00000  | 1.16861  | 0.00000  | 0.00000  |
| 29 | C2 | PZ  | 0.00000  | 0.14598  | 0.00000  | 0.04918  | 0.00739  |
| 30 | C2 | DXX | -0.00907 | 0.00000  | -0.04783 | 0.00000  | 0.00000  |
| 31 | C2 | DYY | 0.01439  | 0.00000  | -0.01606 | 0.00000  | 0.00000  |
| 32 | C2 | DZZ | -0.02447 | 0.00000  | 0.04487  | 0.00000  | 0.00000  |
| 33 | C2 | DXY | 0.00505  | 0.00000  | 0.09884  | 0.00000  | 0.00000  |
| 34 | C2 | DXZ | 0.00000  | 0.31183  | 0.00000  | -0.05631 | 0.08238  |

|    |    |     |          |          |          |          |          |
|----|----|-----|----------|----------|----------|----------|----------|
| 35 | C2 | DYZ | 0.00000  | -0.12785 | 0.00000  | -0.17700 | -0.08315 |
| 36 | C3 | S   | -0.00610 | 0.00000  | 0.01911  | 0.00000  | 0.00000  |
| 37 | C3 | S   | -0.48581 | 0.00000  | 0.21190  | 0.00000  | 0.00000  |
| 38 | C3 | PX  | -0.44044 | 0.00000  | -0.45149 | 0.00000  | 0.00000  |
| 39 | C3 | PY  | 0.12484  | 0.00000  | -0.23514 | 0.00000  | 0.00000  |
| 40 | C3 | PZ  | 0.00000  | -0.02844 | 0.00000  | -0.04338 | 0.05506  |
| 41 | C3 | S   | 2.01149  | 0.00000  | -0.50347 | 0.00000  | 0.00000  |
| 42 | C3 | PX  | 4.31556  | 0.00000  | 3.72735  | 0.00000  | 0.00000  |
| 43 | C3 | PY  | 0.30181  | 0.00000  | 0.96192  | 0.00000  | 0.00000  |
| 44 | C3 | PZ  | 0.00000  | 0.19802  | 0.00000  | 0.11123  | -0.13586 |
| 45 | C3 | DXX | -0.01375 | 0.00000  | 0.09158  | 0.00000  | 0.00000  |
| 46 | C3 | DYY | 0.08572  | 0.00000  | -0.03850 | 0.00000  | 0.00000  |
| 47 | C3 | DZZ | -0.08712 | 0.00000  | -0.01424 | 0.00000  | 0.00000  |
| 48 | C3 | DXY | -0.01797 | 0.00000  | -0.01645 | 0.00000  | 0.00000  |
| 49 | C3 | DXZ | 0.00000  | 0.06161  | 0.00000  | -0.28310 | 0.12367  |
| 50 | C3 | DYZ | 0.00000  | 0.06696  | 0.00000  | -0.19199 | 0.02329  |
| 51 | C4 | S   | -0.04221 | 0.00000  | 0.00504  | 0.00000  | 0.00000  |
| 52 | C4 | S   | -0.84244 | 0.00000  | 0.01445  | 0.00000  | 0.00000  |
| 53 | C4 | PX  | -0.05393 | 0.00000  | -0.29679 | 0.00000  | 0.00000  |
| 54 | C4 | PY  | 0.33044  | 0.00000  | -0.08075 | 0.00000  | 0.00000  |
| 55 | C4 | PZ  | 0.00000  | -0.02370 | 0.00000  | -0.00872 | -0.01564 |
| 56 | C4 | S   | 2.18340  | 0.00000  | -0.74310 | 0.00000  | 0.00000  |
| 57 | C4 | PX  | 0.96231  | 0.00000  | 0.07850  | 0.00000  | 0.00000  |
| 58 | C4 | PY  | -2.67242 | 0.00000  | 0.99082  | 0.00000  | 0.00000  |
| 59 | C4 | PZ  | 0.00000  | 0.14134  | 0.00000  | -0.11106 | -0.21071 |
| 60 | C4 | DXX | -0.01010 | 0.00000  | -0.02502 | 0.00000  | 0.00000  |
| 61 | C4 | DYY | -0.07620 | 0.00000  | 0.03641  | 0.00000  | 0.00000  |
| 62 | C4 | DZZ | 0.00891  | 0.00000  | 0.01933  | 0.00000  | 0.00000  |
| 63 | C4 | DXY | -0.03385 | 0.00000  | 0.04246  | 0.00000  | 0.00000  |
| 64 | C4 | DXZ | 0.00000  | 0.23641  | 0.00000  | -0.05608 | 0.20100  |
| 65 | C4 | DYZ | 0.00000  | 0.23815  | 0.00000  | -0.18295 | -0.28085 |
| 66 | C5 | S   | -0.00044 | 0.00000  | 0.01362  | 0.00000  | 0.00000  |
| 67 | C5 | S   | -0.04449 | 0.00000  | 0.48267  | 0.00000  | 0.00000  |
| 68 | C5 | PX  | -0.04661 | 0.00000  | 0.21643  | 0.00000  | 0.00000  |
| 69 | C5 | PY  | 0.00841  | 0.00000  | -0.12449 | 0.00000  | 0.00000  |
| 70 | C5 | PZ  | 0.00000  | 0.06272  | 0.00000  | 0.05693  | 0.06988  |
| 71 | C5 | S   | 0.98274  | 0.00000  | -1.87787 | 0.00000  | 0.00000  |
| 72 | C5 | PX  | -0.09947 | 0.00000  | -1.32521 | 0.00000  | 0.00000  |
| 73 | C5 | PY  | -0.14455 | 0.00000  | 1.97502  | 0.00000  | 0.00000  |
| 74 | C5 | PZ  | 0.00000  | -0.07582 | 0.00000  | -0.03948 | -0.01080 |
| 75 | C5 | DXX | -0.03972 | 0.00000  | 0.00679  | 0.00000  | 0.00000  |
| 76 | C5 | DYY | 0.06818  | 0.00000  | -0.05002 | 0.00000  | 0.00000  |
| 77 | C5 | DZZ | -0.04106 | 0.00000  | 0.05021  | 0.00000  | 0.00000  |
| 78 | C5 | DXY | 0.02109  | 0.00000  | 0.05809  | 0.00000  | 0.00000  |
| 79 | C5 | DXZ | 0.00000  | -0.21220 | 0.00000  | 0.07592  | -0.13301 |
| 80 | C5 | DYZ | 0.00000  | 0.05872  | 0.00000  | 0.19930  | 0.00958  |
| 81 | C6 | S   | -0.03509 | 0.00000  | -0.00234 | 0.00000  | 0.00000  |
| 82 | C6 | S   | -0.55143 | 0.00000  | -0.02906 | 0.00000  | 0.00000  |
| 83 | C6 | PX  | 0.03515  | 0.00000  | 0.30693  | 0.00000  | 0.00000  |
| 84 | C6 | PY  | -0.03055 | 0.00000  | -0.19651 | 0.00000  | 0.00000  |
| 85 | C6 | PZ  | 0.00000  | 0.09108  | 0.00000  | 0.04003  | 0.00979  |
| 86 | C6 | S   | 4.30492  | 0.00000  | 2.09993  | 0.00000  | 0.00000  |
| 87 | C6 | PX  | 1.03298  | 0.00000  | 0.03805  | 0.00000  | 0.00000  |
| 88 | C6 | PY  | 1.92582  | 0.00000  | 0.59630  | 0.00000  | 0.00000  |

|     |    |     |          |          |          |          |          |
|-----|----|-----|----------|----------|----------|----------|----------|
| 89  | C6 | PZ  | 0.00000  | -0.27570 | 0.00000  | -0.19614 | 0.02813  |
| 90  | C6 | DXX | 0.01207  | 0.00000  | 0.02885  | 0.00000  | 0.00000  |
| 91  | C6 | DYY | 0.00973  | 0.00000  | -0.02396 | 0.00000  | 0.00000  |
| 92  | C6 | DZZ | -0.04125 | 0.00000  | 0.01520  | 0.00000  | 0.00000  |
| 93  | C6 | DXY | -0.00233 | 0.00000  | 0.08731  | 0.00000  | 0.00000  |
| 94  | C6 | DXZ | 0.00000  | -0.24472 | 0.00000  | 0.16066  | -0.21843 |
| 95  | C6 | DYZ | 0.00000  | 0.31873  | 0.00000  | 0.27281  | -0.01027 |
| 96  | C7 | S   | 0.03038  | 0.00000  | 0.00455  | 0.00000  | 0.00000  |
| 97  | C7 | S   | 0.31190  | 0.00000  | -0.11458 | 0.00000  | 0.00000  |
| 98  | C7 | PX  | 0.05111  | 0.00000  | 0.06413  | 0.00000  | 0.00000  |
| 99  | C7 | PY  | 0.05040  | 0.00000  | -0.03923 | 0.00000  | 0.00000  |
| 100 | C7 | PZ  | 0.00000  | -0.05267 | 0.00000  | -0.00388 | -0.04755 |
| 101 | C7 | S   | -3.33786 | 0.00000  | -1.63008 | 0.00000  | 0.00000  |
| 102 | C7 | PX  | -1.12820 | 0.00000  | -0.79721 | 0.00000  | 0.00000  |
| 103 | C7 | PY  | -1.41535 | 0.00000  | -0.98191 | 0.00000  | 0.00000  |
| 104 | C7 | PZ  | 0.00000  | -0.00968 | 0.00000  | 0.02749  | 0.05590  |
| 105 | C7 | DXX | 0.12773  | 0.00000  | 0.01494  | 0.00000  | 0.00000  |
| 106 | C7 | DYY | -0.06154 | 0.00000  | -0.04505 | 0.00000  | 0.00000  |
| 107 | C7 | DZZ | -0.05582 | 0.00000  | 0.02754  | 0.00000  | 0.00000  |
| 108 | C7 | DXY | 0.03187  | 0.00000  | -0.03045 | 0.00000  | 0.00000  |
| 109 | C7 | DXZ | 0.00000  | -0.16577 | 0.00000  | -0.02829 | -0.09718 |
| 110 | C7 | DYZ | 0.00000  | -0.07806 | 0.00000  | -0.03983 | 0.03474  |
| 111 | O1 | S   | -0.00445 | 0.00000  | 0.00508  | 0.00000  | 0.00000  |
| 112 | O1 | S   | -0.00541 | 0.00000  | 0.14400  | 0.00000  | 0.00000  |
| 113 | O1 | PX  | 0.27309  | 0.00000  | -0.20443 | 0.00000  | 0.00000  |
| 114 | O1 | PY  | -0.05340 | 0.00000  | -0.08577 | 0.00000  | 0.00000  |
| 115 | O1 | PZ  | 0.00000  | 0.03963  | 0.00000  | -0.04553 | -0.14717 |
| 116 | O1 | S   | 0.62886  | 0.00000  | -0.40346 | 0.00000  | 0.00000  |
| 117 | O1 | PX  | -0.91614 | 0.00000  | 0.58216  | 0.00000  | 0.00000  |
| 118 | O1 | PY  | -0.32952 | 0.00000  | 0.46321  | 0.00000  | 0.00000  |
| 119 | O1 | PZ  | 0.00000  | -0.20498 | 0.00000  | 0.21113  | 0.48525  |
| 120 | O1 | DXX | 0.14052  | 0.00000  | -0.01589 | 0.00000  | 0.00000  |
| 121 | O1 | DYY | -0.01799 | 0.00000  | 0.07859  | 0.00000  | 0.00000  |
| 122 | O1 | DZZ | -0.13660 | 0.00000  | 0.06038  | 0.00000  | 0.00000  |
| 123 | O1 | DXY | -0.08382 | 0.00000  | 0.02354  | 0.00000  | 0.00000  |
| 124 | O1 | DXZ | 0.00000  | 0.15044  | 0.00000  | -0.13134 | -0.24789 |
| 125 | O1 | DYZ | 0.00000  | -0.21699 | 0.00000  | 0.19028  | 0.23218  |
| 126 | H4 | S   | 0.01274  | 0.00000  | -0.40492 | 0.00000  | 0.00000  |
| 127 | H4 | S   | -0.10272 | 0.00000  | -0.68887 | 0.00000  | 0.00000  |
| 128 | H4 | PX  | -0.01679 | 0.00000  | 0.02244  | 0.00000  | 0.00000  |
| 129 | H4 | PY  | -0.02763 | 0.00000  | -0.00429 | 0.00000  | 0.00000  |
| 130 | H4 | PZ  | 0.00000  | 0.10626  | 0.00000  | 0.05104  | 0.07204  |
| 131 | N1 | S   | -0.00144 | 0.00000  | 0.01859  | 0.00000  | 0.00000  |
| 132 | N1 | S   | 0.24132  | 0.00000  | 0.24913  | 0.00000  | 0.00000  |
| 133 | N1 | PX  | 0.08803  | 0.00000  | 0.08288  | 0.00000  | 0.00000  |
| 134 | N1 | PY  | 0.09550  | 0.00000  | -0.01921 | 0.00000  | 0.00000  |
| 135 | N1 | PZ  | 0.00000  | 0.06906  | 0.00000  | 0.07580  | 0.00775  |
| 136 | N1 | S   | 0.26317  | 0.00000  | -1.22721 | 0.00000  | 0.00000  |
| 137 | N1 | PX  | -0.18513 | 0.00000  | -0.47734 | 0.00000  | 0.00000  |
| 138 | N1 | PY  | -0.10857 | 0.00000  | -0.37986 | 0.00000  | 0.00000  |
| 139 | N1 | PZ  | 0.00000  | 0.09586  | 0.00000  | 0.18203  | -0.08186 |
| 140 | N1 | DXX | 0.06157  | 0.00000  | 0.02550  | 0.00000  | 0.00000  |
| 141 | N1 | DYY | 0.02927  | 0.00000  | 0.05359  | 0.00000  | 0.00000  |
| 142 | N1 | DZZ | -0.01743 | 0.00000  | 0.03698  | 0.00000  | 0.00000  |



|     |     |     |          |          |          |          |          |
|-----|-----|-----|----------|----------|----------|----------|----------|
| 143 | N1  | DXY | -0.00381 | 0.00000  | 0.02339  | 0.00000  | 0.00000  |
| 144 | N1  | DXZ | 0.00000  | -0.07818 | 0.00000  | -0.13478 | 0.00765  |
| 145 | N1  | DYZ | 0.00000  | -0.18977 | 0.00000  | -0.23836 | 0.03466  |
| 146 | H6  | S   | -0.20573 | 0.00000  | 0.44840  | 0.00000  | 0.00000  |
| 147 | H6  | S   | -0.40230 | 0.00000  | 0.70990  | 0.00000  | 0.00000  |
| 148 | H6  | PX  | 0.01897  | 0.00000  | -0.02913 | 0.00000  | 0.00000  |
| 149 | H6  | PY  | 0.01211  | 0.00000  | -0.01835 | 0.00000  | 0.00000  |
| 150 | H6  | PZ  | 0.00000  | -0.12707 | 0.00000  | 0.08013  | -0.04197 |
| 151 | C8  | S   | -0.01494 | 0.00000  | -0.00553 | 0.00000  | 0.00000  |
| 152 | C8  | S   | -0.45188 | 0.00000  | -0.15027 | 0.00000  | 0.00000  |
| 153 | C8  | PX  | -0.20067 | 0.00000  | -0.07846 | 0.00000  | 0.00000  |
| 154 | C8  | PY  | 0.01900  | 0.00000  | -0.25835 | 0.00000  | 0.00000  |
| 155 | C8  | PZ  | 0.00000  | -0.01881 | 0.00000  | 0.00997  | -0.01181 |
| 156 | C8  | S   | 1.51665  | 0.00000  | -0.87062 | 0.00000  | 0.00000  |
| 157 | C8  | PX  | 0.88938  | 0.00000  | -0.63612 | 0.00000  | 0.00000  |
| 158 | C8  | PY  | -0.96385 | 0.00000  | 2.61431  | 0.00000  | 0.00000  |
| 159 | C8  | PZ  | 0.00000  | 0.06505  | 0.00000  | -0.15390 | 0.09643  |
| 160 | C8  | DXX | -0.01248 | 0.00000  | -0.06189 | 0.00000  | 0.00000  |
| 161 | C8  | DYY | 0.02131  | 0.00000  | -0.05819 | 0.00000  | 0.00000  |
| 162 | C8  | DZZ | -0.03501 | 0.00000  | 0.08308  | 0.00000  | 0.00000  |
| 163 | C8  | DXY | -0.01535 | 0.00000  | -0.03544 | 0.00000  | 0.00000  |
| 164 | C8  | DXZ | 0.00000  | 0.05771  | 0.00000  | 0.12164  | -0.04495 |
| 165 | C8  | DYZ | 0.00000  | 0.18734  | 0.00000  | -0.11047 | 0.10135  |
| 166 | H8  | S   | 0.53355  | 0.00000  | 0.33972  | 0.00000  | 0.00000  |
| 167 | H8  | S   | 0.65196  | 0.00000  | 0.37525  | 0.00000  | 0.00000  |
| 168 | H8  | PX  | 0.02354  | 0.00000  | 0.02375  | 0.00000  | 0.00000  |
| 169 | H8  | PY  | -0.03144 | 0.00000  | -0.03759 | 0.00000  | 0.00000  |
| 170 | H8  | PZ  | 0.00000  | -0.08865 | 0.00000  | -0.00180 | -0.05100 |
| 171 | C10 | S   | 0.01676  | 0.00000  | -0.00979 | 0.00000  | 0.00000  |
| 172 | C10 | S   | 0.21621  | 0.00000  | -0.03738 | 0.00000  | 0.00000  |
| 173 | C10 | PX  | 0.02475  | 0.00000  | -0.02328 | 0.00000  | 0.00000  |
| 174 | C10 | PY  | -0.01604 | 0.00000  | 0.13591  | 0.00000  | 0.00000  |
| 175 | C10 | PZ  | 0.00000  | 0.07767  | 0.00000  | -0.02960 | 0.03710  |
| 176 | C10 | S   | -1.71725 | 0.00000  | 2.25270  | 0.00000  | 0.00000  |
| 177 | C10 | PX  | -0.42307 | 0.00000  | -0.30762 | 0.00000  | 0.00000  |
| 178 | C10 | PY  | -0.90127 | 0.00000  | 0.86479  | 0.00000  | 0.00000  |
| 179 | C10 | PZ  | 0.00000  | -0.08985 | 0.00000  | 0.05705  | -0.05958 |
| 180 | C10 | DXX | 0.07442  | 0.00000  | -0.06617 | 0.00000  | 0.00000  |
| 181 | C10 | DYY | -0.03550 | 0.00000  | 0.03945  | 0.00000  | 0.00000  |
| 182 | C10 | DZZ | -0.02961 | 0.00000  | 0.04984  | 0.00000  | 0.00000  |
| 183 | C10 | DXY | -0.01385 | 0.00000  | -0.03195 | 0.00000  | 0.00000  |
| 184 | C10 | DXZ | 0.00000  | 0.19505  | 0.00000  | 0.31519  | -0.14786 |
| 185 | C10 | DYZ | 0.00000  | -0.14189 | 0.00000  | 0.17395  | -0.13298 |
| 186 | H16 | S   | 0.15817  | 0.00000  | 0.01187  | 0.00000  | 0.00000  |
| 187 | H16 | S   | 0.14199  | 0.00000  | 0.05032  | 0.00000  | 0.00000  |
| 188 | H16 | PX  | -0.00757 | 0.00000  | 0.00892  | 0.00000  | 0.00000  |
| 189 | H16 | PY  | -0.00474 | 0.00000  | -0.01647 | 0.00000  | 0.00000  |
| 190 | H16 | PZ  | 0.00000  | 0.11275  | 0.00000  | 0.13259  | -0.05821 |
| 191 | H18 | S   | -0.07303 | 0.00000  | -0.04594 | 0.00000  | 0.00000  |
| 192 | H18 | S   | -0.20072 | 0.00000  | -0.03155 | 0.00000  | 0.00000  |
| 193 | H18 | PX  | 0.00233  | 0.00000  | -0.00457 | 0.00000  | 0.00000  |
| 194 | H18 | PY  | 0.01726  | 0.00000  | -0.00798 | 0.00000  | 0.00000  |
| 195 | H18 | PZ  | 0.00000  | -0.02897 | 0.00000  | -0.18301 | 0.10433  |
| 196 | C9  | S   | 0.00735  | 0.00000  | 0.01506  | 0.00000  | 0.00000  |

|     |    |     |          |          |          |          |          |
|-----|----|-----|----------|----------|----------|----------|----------|
| 197 | C9 | S   | 0.11357  | 0.00000  | 0.17776  | 0.00000  | 0.00000  |
| 198 | C9 | PX  | -0.10007 | 0.00000  | 0.07919  | 0.00000  | 0.00000  |
| 199 | C9 | PY  | -0.07254 | 0.00000  | -0.03207 | 0.00000  | 0.00000  |
| 200 | C9 | PZ  | 0.00000  | -0.00636 | 0.00000  | 0.01313  | 0.07119  |
| 201 | C9 | S   | 0.37220  | 0.00000  | -0.86014 | 0.00000  | 0.00000  |
| 202 | C9 | PX  | -0.28168 | 0.00000  | 0.15951  | 0.00000  | 0.00000  |
| 203 | C9 | PY  | 0.00325  | 0.00000  | 0.34255  | 0.00000  | 0.00000  |
| 204 | C9 | PZ  | 0.00000  | 0.14747  | 0.00000  | -0.16843 | -0.44117 |
| 205 | C9 | DXX | -0.05233 | 0.00000  | 0.02921  | 0.00000  | 0.00000  |
| 206 | C9 | DYY | 0.07704  | 0.00000  | -0.03604 | 0.00000  | 0.00000  |
| 207 | C9 | DZZ | 0.03090  | 0.00000  | -0.00101 | 0.00000  | 0.00000  |
| 208 | C9 | DXY | 0.18389  | 0.00000  | -0.13171 | 0.00000  | 0.00000  |
| 209 | C9 | DXZ | 0.00000  | -0.01084 | 0.00000  | 0.03581  | 0.13988  |
| 210 | C9 | DYZ | 0.00000  | -0.08795 | 0.00000  | 0.11053  | 0.30611  |
| 211 | H3 | S   | -0.05175 | 0.00000  | 0.03998  | 0.00000  | 0.00000  |
| 212 | H3 | S   | -0.08665 | 0.00000  | -0.03495 | 0.00000  | 0.00000  |
| 213 | H3 | PX  | 0.06707  | 0.00000  | -0.06990 | 0.00000  | 0.00000  |
| 214 | H3 | PY  | 0.00859  | 0.00000  | -0.00491 | 0.00000  | 0.00000  |
| 215 | H3 | PZ  | 0.00000  | -0.01504 | 0.00000  | 0.02107  | 0.07685  |
| 216 | H5 | S   | 0.01148  | 0.03908  | 0.08372  | -0.04149 | -0.05000 |
| 217 | H5 | S   | 0.03361  | 0.05694  | 0.07838  | -0.06063 | -0.19823 |
| 218 | H5 | PX  | -0.02342 | 0.01977  | 0.01623  | -0.02939 | -0.07776 |
| 219 | H5 | PY  | 0.03149  | 0.01998  | -0.00234 | -0.03413 | -0.10237 |
| 220 | H5 | PZ  | -0.03630 | 0.00513  | 0.01969  | -0.00845 | -0.02332 |
| 221 | H7 | S   | 0.01148  | -0.03908 | 0.08372  | 0.04149  | 0.05000  |
| 222 | H7 | S   | 0.03361  | -0.05694 | 0.07838  | 0.06063  | 0.19823  |
| 223 | H7 | PX  | -0.02342 | -0.01977 | 0.01623  | 0.02939  | 0.07776  |
| 224 | H7 | PY  | 0.03149  | -0.01998 | -0.00234 | 0.03413  | 0.10237  |
| 225 | H7 | PZ  | 0.03630  | 0.00513  | -0.01969 | -0.00845 | -0.02332 |

|              |          |          |          |          |          |
|--------------|----------|----------|----------|----------|----------|
| MO:          | 131      | 132      | 133      | 134      | 135      |
| Eigenvalues: | 1.76128  | 1.77360  | 1.88956  | 1.93003  | 1.98351  |
| (ev):        | 47.92702 | 48.26220 | 51.41768 | 52.51890 | 53.97413 |

|    |    | A   | A        | A        | A        | A        |          |
|----|----|-----|----------|----------|----------|----------|----------|
| 1  | H1 | S   | 0.00000  | -0.22188 | -0.05629 | 0.13897  | -0.18629 |
| 2  | H1 | S   | 0.00000  | -0.04031 | -0.00271 | 0.35563  | -0.13177 |
| 3  | H1 | PX  | 0.00000  | -0.02408 | -0.00126 | 0.02052  | -0.02359 |
| 4  | H1 | PY  | 0.00000  | 0.05217  | -0.02240 | -0.07853 | -0.04362 |
| 5  | H1 | PZ  | -0.05805 | 0.00000  | 0.00000  | 0.00000  | 0.00000  |
| 6  | C1 | S   | 0.00000  | 0.03289  | -0.02192 | 0.01814  | 0.00359  |
| 7  | C1 | S   | 0.00000  | 0.53373  | -0.09084 | 0.17671  | 0.14808  |
| 8  | C1 | PX  | 0.00000  | -0.15607 | -0.02254 | 0.09716  | -0.00597 |
| 9  | C1 | PY  | 0.00000  | -0.01057 | -0.00245 | -0.13244 | -0.10437 |
| 10 | C1 | PZ  | -0.04569 | 0.00000  | 0.00000  | 0.00000  | 0.00000  |
| 11 | C1 | S   | 0.00000  | -3.64290 | 1.49353  | -2.64644 | -0.09275 |
| 12 | C1 | PX  | 0.00000  | 0.81929  | -0.64320 | 0.20772  | 0.36247  |
| 13 | C1 | PY  | 0.00000  | 2.76291  | 0.69742  | -0.94982 | 0.32023  |
| 14 | C1 | PZ  | 0.08445  | 0.00000  | 0.00000  | 0.00000  | 0.00000  |
| 15 | C1 | DXX | 0.00000  | 0.03574  | 0.04454  | 0.09123  | 0.07717  |
| 16 | C1 | DYY | 0.00000  | -0.00472 | -0.16847 | -0.08849 | -0.07915 |
| 17 | C1 | DZZ | 0.00000  | -0.03859 | 0.17266  | -0.02208 | 0.01672  |
| 18 | C1 | DXY | 0.00000  | -0.01500 | -0.06618 | -0.09555 | 0.01344  |
| 19 | C1 | DXZ | -0.08250 | 0.00000  | 0.00000  | 0.00000  | 0.00000  |

|    |    |     |          |          |          |          |          |
|----|----|-----|----------|----------|----------|----------|----------|
| 20 | C1 | DYZ | -0.08329 | 0.00000  | 0.00000  | 0.00000  | 0.00000  |
| 21 | C2 | S   | 0.00000  | 0.03044  | -0.00171 | 0.00368  | -0.00445 |
| 22 | C2 | S   | 0.00000  | 0.59337  | 0.22177  | 0.25140  | 0.00531  |
| 23 | C2 | PX  | 0.00000  | 0.18706  | 0.15622  | 0.12660  | 0.02977  |
| 24 | C2 | PY  | 0.00000  | -0.02230 | -0.11123 | -0.19916 | -0.01323 |
| 25 | C2 | PZ  | -0.00571 | 0.00000  | 0.00000  | 0.00000  | 0.00000  |
| 26 | C2 | S   | 0.00000  | -3.69143 | 0.43162  | -1.07691 | -0.01978 |
| 27 | C2 | PX  | 0.00000  | -2.45783 | -0.03245 | -0.65366 | -0.69030 |
| 28 | C2 | PY  | 0.00000  | -0.16981 | -0.04949 | -0.07354 | -1.32415 |
| 29 | C2 | PZ  | -0.05238 | 0.00000  | 0.00000  | 0.00000  | 0.00000  |
| 30 | C2 | DXX | 0.00000  | 0.00718  | -0.06570 | -0.01459 | -0.10720 |
| 31 | C2 | DYY | 0.00000  | 0.02409  | -0.02097 | -0.04606 | 0.00422  |
| 32 | C2 | DZZ | 0.00000  | -0.01996 | 0.11811  | 0.07602  | 0.13308  |
| 33 | C2 | DXY | 0.00000  | -0.03249 | 0.09497  | 0.11436  | 0.12304  |
| 34 | C2 | DXZ | -0.02798 | 0.00000  | 0.00000  | 0.00000  | 0.00000  |
| 35 | C2 | DYZ | 0.02779  | 0.00000  | 0.00000  | 0.00000  | 0.00000  |
| 36 | C3 | S   | 0.00000  | -0.01418 | 0.02639  | -0.00216 | 0.01425  |
| 37 | C3 | S   | 0.00000  | -0.50427 | 0.49625  | -0.22690 | 0.27599  |
| 38 | C3 | PX  | 0.00000  | 0.02003  | 0.06645  | 0.14335  | -0.08072 |
| 39 | C3 | PY  | 0.00000  | -0.58057 | 0.10281  | -0.13267 | 0.08518  |
| 40 | C3 | PZ  | 0.02715  | 0.00000  | 0.00000  | 0.00000  | 0.00000  |
| 41 | C3 | S   | 0.00000  | 2.28403  | -1.62373 | 0.40692  | -3.04955 |
| 42 | C3 | PX  | 0.00000  | -0.72130 | 1.02791  | -1.23867 | 0.81201  |
| 43 | C3 | PY  | 0.00000  | 6.02401  | 0.41785  | 1.33322  | 0.46253  |
| 44 | C3 | PZ  | -0.15073 | 0.00000  | 0.00000  | 0.00000  | 0.00000  |
| 45 | C3 | DXX | 0.00000  | 0.00365  | 0.17751  | 0.14714  | -0.04868 |
| 46 | C3 | DYY | 0.00000  | -0.01494 | -0.19919 | -0.16832 | -0.04062 |
| 47 | C3 | DZZ | 0.00000  | -0.03529 | 0.04374  | 0.02464  | 0.15126  |
| 48 | C3 | DXY | 0.00000  | -0.00401 | -0.12725 | -0.07468 | -0.08073 |
| 49 | C3 | DXZ | 0.19684  | 0.00000  | 0.00000  | 0.00000  | 0.00000  |
| 50 | C3 | DYZ | 0.08427  | 0.00000  | 0.00000  | 0.00000  | 0.00000  |
| 51 | C4 | S   | 0.00000  | 0.03347  | 0.00786  | -0.00321 | -0.00817 |
| 52 | C4 | S   | 0.00000  | 0.38116  | 0.28106  | -0.02786 | -0.02676 |
| 53 | C4 | PX  | 0.00000  | -0.02269 | 0.04175  | -0.20224 | -0.00371 |
| 54 | C4 | PY  | 0.00000  | -0.22077 | 0.19773  | -0.19734 | 0.05890  |
| 55 | C4 | PZ  | 0.00126  | 0.00000  | 0.00000  | 0.00000  | 0.00000  |
| 56 | C4 | S   | 0.00000  | -1.49259 | -0.96965 | 0.17156  | 1.06810  |
| 57 | C4 | PX  | 0.00000  | 0.18445  | -1.56105 | 3.11144  | -0.54722 |
| 58 | C4 | PY  | 0.00000  | 2.79761  | -0.03889 | 1.16493  | -0.28304 |
| 59 | C4 | PZ  | -0.02215 | 0.00000  | 0.00000  | 0.00000  | 0.00000  |
| 60 | C4 | DXX | 0.00000  | -0.02634 | -0.15691 | -0.01752 | -0.09637 |
| 61 | C4 | DYY | 0.00000  | 0.16439  | 0.03293  | -0.01933 | 0.08496  |
| 62 | C4 | DZZ | 0.00000  | -0.09312 | 0.15904  | 0.00397  | 0.04270  |
| 63 | C4 | DXY | 0.00000  | 0.04163  | -0.05707 | -0.18388 | -0.04817 |
| 64 | C4 | DXZ | 0.03880  | 0.00000  | 0.00000  | 0.00000  | 0.00000  |
| 65 | C4 | DYZ | -0.02599 | 0.00000  | 0.00000  | 0.00000  | 0.00000  |
| 66 | C5 | S   | 0.00000  | -0.03049 | 0.00090  | -0.02631 | 0.01226  |
| 67 | C5 | S   | 0.00000  | -0.69620 | 0.05520  | -0.19228 | 0.27626  |
| 68 | C5 | PX  | 0.00000  | -0.17775 | 0.02268  | 0.13806  | 0.03579  |
| 69 | C5 | PY  | 0.00000  | -0.00499 | 0.00569  | 0.20490  | -0.08760 |
| 70 | C5 | PZ  | 0.00422  | 0.00000  | 0.00000  | 0.00000  | 0.00000  |
| 71 | C5 | S   | 0.00000  | 3.41289  | -0.81334 | 2.84668  | -0.05980 |
| 72 | C5 | PX  | 0.00000  | 2.19485  | -0.22353 | 1.40949  | -0.86003 |

|     |    |     |          |          |          |          |          |
|-----|----|-----|----------|----------|----------|----------|----------|
| 73  | C5 | PY  | 0.00000  | -1.91610 | -0.34170 | -1.07785 | -0.03422 |
| 74  | C5 | PZ  | 0.00788  | 0.00000  | 0.00000  | 0.00000  | 0.00000  |
| 75  | C5 | DXX | 0.00000  | 0.01065  | -0.16352 | -0.10235 | -0.09808 |
| 76  | C5 | DYY | 0.00000  | -0.02365 | 0.02719  | 0.07880  | 0.07639  |
| 77  | C5 | DZZ | 0.00000  | -0.01875 | 0.15166  | 0.05899  | 0.02344  |
| 78  | C5 | DXY | 0.00000  | -0.04392 | -0.03626 | -0.03640 | -0.04442 |
| 79  | C5 | DXZ | -0.04947 | 0.00000  | 0.00000  | 0.00000  | 0.00000  |
| 80  | C5 | DYZ | -0.03016 | 0.00000  | 0.00000  | 0.00000  | 0.00000  |
| 81  | C6 | S   | 0.00000  | 0.00889  | -0.00637 | 0.01703  | -0.01113 |
| 82  | C6 | S   | 0.00000  | 0.13133  | -0.08129 | 0.37500  | 0.07503  |
| 83  | C6 | PX  | 0.00000  | 0.10668  | -0.13019 | -0.11564 | -0.15407 |
| 84  | C6 | PY  | 0.00000  | -0.13964 | 0.01416  | 0.06943  | -0.06381 |
| 85  | C6 | PZ  | -0.01395 | 0.00000  | 0.00000  | 0.00000  | 0.00000  |
| 86  | C6 | S   | 0.00000  | 2.55040  | 3.06611  | 0.06141  | -2.32265 |
| 87  | C6 | PX  | 0.00000  | -1.41900 | 1.59398  | -0.40578 | 1.87942  |
| 88  | C6 | PY  | 0.00000  | -0.43439 | -1.64632 | -1.48185 | 3.44351  |
| 89  | C6 | PZ  | 0.19711  | 0.00000  | 0.00000  | 0.00000  | 0.00000  |
| 90  | C6 | DXX | 0.00000  | 0.01789  | -0.08010 | -0.03907 | -0.11486 |
| 91  | C6 | DYY | 0.00000  | 0.07395  | 0.05107  | 0.06958  | -0.15587 |
| 92  | C6 | DZZ | 0.00000  | -0.05527 | 0.03367  | -0.01169 | 0.36897  |
| 93  | C6 | DXY | 0.00000  | 0.00543  | 0.21519  | 0.21334  | 0.03021  |
| 94  | C6 | DXZ | -0.02585 | 0.00000  | 0.00000  | 0.00000  | 0.00000  |
| 95  | C6 | DYZ | -0.12630 | 0.00000  | 0.00000  | 0.00000  | 0.00000  |
| 96  | C7 | S   | 0.00000  | -0.00183 | 0.00516  | 0.00753  | -0.01957 |
| 97  | C7 | S   | 0.00000  | -0.03278 | -0.00418 | -0.02518 | -0.42367 |
| 98  | C7 | PX  | 0.00000  | -0.02545 | -0.06062 | 0.00617  | 0.02888  |
| 99  | C7 | PY  | 0.00000  | 0.20734  | 0.00397  | 0.12948  | -0.13085 |
| 100 | C7 | PZ  | 0.06320  | 0.00000  | 0.00000  | 0.00000  | 0.00000  |
| 101 | C7 | S   | 0.00000  | 1.84004  | 0.12453  | 0.12734  | 2.29331  |
| 102 | C7 | PX  | 0.00000  | -1.00912 | 0.61204  | 0.20288  | -2.37140 |
| 103 | C7 | PY  | 0.00000  | 0.83387  | -0.57614 | 0.52383  | 0.47385  |
| 104 | C7 | PZ  | -0.09727 | 0.00000  | 0.00000  | 0.00000  | 0.00000  |
| 105 | C7 | DXX | 0.00000  | 0.00153  | -0.19977 | -0.12991 | -0.01452 |
| 106 | C7 | DYY | 0.00000  | 0.01722  | 0.12954  | 0.10064  | -0.07995 |
| 107 | C7 | DZZ | 0.00000  | -0.00930 | 0.04890  | 0.02801  | 0.17577  |
| 108 | C7 | DXY | 0.00000  | -0.08174 | 0.04831  | 0.01508  | -0.08384 |
| 109 | C7 | DXZ | 0.21815  | 0.00000  | 0.00000  | 0.00000  | 0.00000  |
| 110 | C7 | DYZ | 0.23940  | 0.00000  | 0.00000  | 0.00000  | 0.00000  |
| 111 | O1 | S   | 0.00000  | -0.00643 | -0.01387 | 0.05872  | 0.00388  |
| 112 | O1 | S   | 0.00000  | -0.07366 | -0.19921 | 0.63385  | 0.06668  |
| 113 | O1 | PX  | 0.00000  | -0.18809 | -0.05709 | 0.28583  | -0.00811 |
| 114 | O1 | PY  | 0.00000  | -0.19489 | -0.10585 | 0.12861  | -0.06196 |
| 115 | O1 | PZ  | -0.01401 | 0.00000  | 0.00000  | 0.00000  | 0.00000  |
| 116 | O1 | S   | 0.00000  | 0.01197  | 0.73270  | -2.50599 | -0.13326 |
| 117 | O1 | PX  | 0.00000  | 1.07112  | 0.46518  | -1.42096 | 0.14093  |
| 118 | O1 | PY  | 0.00000  | 1.29298  | 0.41311  | -0.39967 | 0.34937  |
| 119 | O1 | PZ  | 0.04381  | 0.00000  | 0.00000  | 0.00000  | 0.00000  |
| 120 | O1 | DXX | 0.00000  | -0.05212 | -0.11032 | 0.30815  | -0.00230 |
| 121 | O1 | DYY | 0.00000  | -0.01601 | -0.05131 | 0.19746  | 0.04480  |
| 122 | O1 | DZZ | 0.00000  | -0.03125 | 0.01898  | -0.00357 | -0.01032 |
| 123 | O1 | DXY | 0.00000  | -0.05866 | -0.12233 | 0.21600  | -0.03159 |
| 124 | O1 | DXZ | -0.01948 | 0.00000  | 0.00000  | 0.00000  | 0.00000  |
| 125 | O1 | DYZ | 0.01043  | 0.00000  | 0.00000  | 0.00000  | 0.00000  |
| 126 | H4 | S   | 0.00000  | 0.31521  | 0.08919  | 0.17391  | -0.14830 |

|     |     |     |          |          |          |          |          |
|-----|-----|-----|----------|----------|----------|----------|----------|
| 127 | H4  | S   | 0.00000  | 0.67989  | 0.09722  | 0.44026  | -0.18647 |
| 128 | H4  | PX  | 0.00000  | -0.01491 | 0.02615  | -0.01315 | 0.02725  |
| 129 | H4  | PY  | 0.00000  | 0.03838  | 0.02626  | -0.00318 | -0.00783 |
| 130 | H4  | PZ  | 0.00790  | 0.00000  | 0.00000  | 0.00000  | 0.00000  |
| 131 | N1  | S   | 0.00000  | 0.00334  | 0.08153  | 0.01435  | -0.08700 |
| 132 | N1  | S   | 0.00000  | -0.05745 | 1.01957  | 0.02745  | -1.29721 |
| 133 | N1  | PX  | 0.00000  | -0.14029 | 0.08259  | -0.01491 | 0.09267  |
| 134 | N1  | PY  | 0.00000  | 0.00435  | -0.01891 | -0.04172 | -0.06824 |
| 135 | N1  | PZ  | -0.09482 | 0.00000  | 0.00000  | 0.00000  | 0.00000  |
| 136 | N1  | S   | 0.00000  | -0.62349 | -5.42373 | -1.06153 | 7.19966  |
| 137 | N1  | PX  | 0.00000  | 0.74918  | -1.67930 | 0.10905  | 0.85801  |
| 138 | N1  | PY  | 0.00000  | -1.30852 | -0.78215 | -0.91176 | 1.81129  |
| 139 | N1  | PZ  | -0.13483 | 0.00000  | 0.00000  | 0.00000  | 0.00000  |
| 140 | N1  | DXX | 0.00000  | -0.07873 | 0.11246  | -0.12805 | -0.28168 |
| 141 | N1  | DYY | 0.00000  | 0.00570  | 0.19158  | 0.04244  | -0.28698 |
| 142 | N1  | DZZ | 0.00000  | 0.03865  | 0.04713  | 0.07627  | 0.22550  |
| 143 | N1  | DXY | 0.00000  | -0.00808 | -0.15139 | -0.18723 | 0.05185  |
| 144 | N1  | DXZ | 0.34769  | 0.00000  | 0.00000  | 0.00000  | 0.00000  |
| 145 | N1  | DYZ | 0.03428  | 0.00000  | 0.00000  | 0.00000  | 0.00000  |
| 146 | H6  | S   | 0.00000  | -0.21413 | -0.01203 | -0.09914 | -0.24106 |
| 147 | H6  | S   | 0.00000  | -0.57029 | -0.05666 | -0.10741 | -0.33979 |
| 148 | H6  | PX  | 0.00000  | 0.01490  | 0.01372  | 0.04012  | 0.04903  |
| 149 | H6  | PY  | 0.00000  | 0.01168  | -0.01983 | -0.05398 | -0.07644 |
| 150 | H6  | PZ  | -0.00256 | 0.00000  | 0.00000  | 0.00000  | 0.00000  |
| 151 | C8  | S   | 0.00000  | -0.00923 | 0.01302  | 0.00995  | 0.01921  |
| 152 | C8  | S   | 0.00000  | -0.04892 | 0.08659  | 0.07350  | 0.43761  |
| 153 | C8  | PX  | 0.00000  | -0.12627 | 0.01219  | -0.07883 | -0.10871 |
| 154 | C8  | PY  | 0.00000  | -0.20279 | -0.05250 | -0.14021 | 0.08020  |
| 155 | C8  | PZ  | -0.02715 | 0.00000  | 0.00000  | 0.00000  | 0.00000  |
| 156 | C8  | S   | 0.00000  | -1.86436 | 0.61847  | -0.98674 | -2.57796 |
| 157 | C8  | PX  | 0.00000  | 0.78446  | -2.30724 | 0.55344  | 1.62453  |
| 158 | C8  | PY  | 0.00000  | 3.13767  | 1.68899  | 2.09835  | -2.50495 |
| 159 | C8  | PZ  | 0.17372  | 0.00000  | 0.00000  | 0.00000  | 0.00000  |
| 160 | C8  | DXX | 0.00000  | -0.07652 | 0.13469  | 0.07620  | -0.10235 |
| 161 | C8  | DYY | 0.00000  | -0.04528 | -0.13814 | -0.12413 | -0.06844 |
| 162 | C8  | DZZ | 0.00000  | 0.07355  | 0.00035  | 0.01714  | 0.21241  |
| 163 | C8  | DXY | 0.00000  | 0.01891  | 0.03006  | 0.09160  | -0.02451 |
| 164 | C8  | DXZ | -0.30860 | 0.00000  | 0.00000  | 0.00000  | 0.00000  |
| 165 | C8  | DYZ | 0.03477  | 0.00000  | 0.00000  | 0.00000  | 0.00000  |
| 166 | H8  | S   | 0.00000  | 0.11888  | 0.04624  | 0.11878  | 0.31817  |
| 167 | H8  | S   | 0.00000  | 0.24079  | -0.33573 | -0.12629 | 0.67148  |
| 168 | H8  | PX  | 0.00000  | 0.01919  | 0.03037  | 0.03051  | 0.04189  |
| 169 | H8  | PY  | 0.00000  | -0.01629 | -0.00591 | 0.01143  | -0.05524 |
| 170 | H8  | PZ  | 0.09793  | 0.00000  | 0.00000  | 0.00000  | 0.00000  |
| 171 | C10 | S   | 0.00000  | -0.01546 | -0.00620 | -0.01234 | 0.00275  |
| 172 | C10 | S   | 0.00000  | 0.01979  | 0.05492  | 0.01938  | -0.10203 |
| 173 | C10 | PX  | 0.00000  | -0.05213 | -0.03393 | -0.03790 | 0.01581  |
| 174 | C10 | PY  | 0.00000  | 0.22061  | 0.14619  | 0.18794  | -0.06390 |
| 175 | C10 | PZ  | 0.02564  | 0.00000  | 0.00000  | 0.00000  | 0.00000  |
| 176 | C10 | S   | 0.00000  | 2.70893  | 1.36583  | 1.80492  | -1.17880 |
| 177 | C10 | PX  | 0.00000  | -0.77495 | 0.79893  | -0.53947 | -0.59157 |
| 178 | C10 | PY  | 0.00000  | 0.90481  | 0.67882  | 0.55267  | -0.42071 |
| 179 | C10 | PZ  | -0.06982 | 0.00000  | 0.00000  | 0.00000  | 0.00000  |
| 180 | C10 | DXX | 0.00000  | -0.03425 | -0.04796 | 0.00627  | -0.00411 |

|     |     |     |          |          |          |          |          |
|-----|-----|-----|----------|----------|----------|----------|----------|
| 181 | C10 | DYY | 0.00000  | 0.03119  | 0.00008  | -0.00618 | -0.03633 |
| 182 | C10 | DZZ | 0.00000  | 0.03742  | 0.08358  | 0.04972  | 0.09115  |
| 183 | C10 | DXY | 0.00000  | -0.05058 | 0.03391  | -0.01601 | -0.00587 |
| 184 | C10 | DXZ | 0.47851  | 0.00000  | 0.00000  | 0.00000  | 0.00000  |
| 185 | C10 | DYZ | 0.00589  | 0.00000  | 0.00000  | 0.00000  | 0.00000  |
| 186 | H16 | S   | 0.00000  | 0.01316  | -0.15200 | -0.00830 | 0.13135  |
| 187 | H16 | S   | 0.00000  | 0.19742  | -0.26120 | 0.14066  | 0.25365  |
| 188 | H16 | PX  | 0.00000  | 0.01569  | 0.00439  | 0.01889  | 0.02447  |
| 189 | H16 | PY  | 0.00000  | -0.01086 | 0.00431  | 0.01824  | 0.01577  |
| 190 | H16 | PZ  | 0.27469  | 0.00000  | 0.00000  | 0.00000  | 0.00000  |
| 191 | H18 | S   | 0.00000  | -0.12383 | 0.14620  | -0.10019 | -0.10901 |
| 192 | H18 | S   | 0.00000  | -0.17685 | 0.25908  | -0.14385 | -0.14189 |
| 193 | H18 | PX  | 0.00000  | -0.00230 | -0.02470 | -0.01459 | -0.00597 |
| 194 | H18 | PY  | 0.00000  | -0.00518 | 0.00065  | 0.00984  | 0.01488  |
| 195 | H18 | PZ  | -0.23021 | 0.00000  | 0.00000  | 0.00000  | 0.00000  |
| 196 | C9  | S   | 0.00000  | 0.07625  | -0.00830 | 0.00494  | -0.00081 |
| 197 | C9  | S   | 0.00000  | 0.87661  | -0.11980 | -0.04626 | -0.02934 |
| 198 | C9  | PX  | 0.00000  | 0.12214  | 0.04698  | -0.17689 | 0.01374  |
| 199 | C9  | PY  | 0.00000  | -0.15464 | 0.10156  | -0.10865 | 0.00838  |
| 200 | C9  | PZ  | 0.00890  | 0.00000  | 0.00000  | 0.00000  | 0.00000  |
| 201 | C9  | S   | 0.00000  | -3.17215 | -0.20040 | 1.34302  | -0.05517 |
| 202 | C9  | PX  | 0.00000  | 0.56601  | 0.36763  | -0.63082 | 0.13601  |
| 203 | C9  | PY  | 0.00000  | 1.10981  | -0.39377 | 0.27851  | -0.09599 |
| 204 | C9  | PZ  | -0.04374 | 0.00000  | 0.00000  | 0.00000  | 0.00000  |
| 205 | C9  | DXX | 0.00000  | -0.10657 | -0.30974 | 0.35305  | -0.12446 |
| 206 | C9  | DYY | 0.00000  | 0.03237  | 0.12065  | -0.05743 | 0.06220  |
| 207 | C9  | DZZ | 0.00000  | 0.13439  | 0.18067  | -0.24220 | 0.06449  |
| 208 | C9  | DXY | 0.00000  | -0.06075 | 0.15690  | -0.00508 | 0.07596  |
| 209 | C9  | DXZ | 0.01711  | 0.00000  | 0.00000  | 0.00000  | 0.00000  |
| 210 | C9  | DYZ | 0.03353  | 0.00000  | 0.00000  | 0.00000  | 0.00000  |
| 211 | H3  | S   | 0.00000  | 0.18945  | 0.05406  | -0.18872 | 0.01158  |
| 212 | H3  | S   | 0.00000  | -0.08306 | 0.24360  | -0.34527 | 0.05169  |
| 213 | H3  | PX  | 0.00000  | -0.01489 | 0.16396  | -0.07963 | 0.08242  |
| 214 | H3  | PY  | 0.00000  | 0.01917  | 0.00987  | -0.00484 | 0.00799  |
| 215 | H3  | PZ  | 0.01026  | 0.00000  | 0.00000  | 0.00000  | 0.00000  |
| 216 | H5  | S   | -0.00206 | 0.35679  | -0.04896 | 0.01931  | -0.00624 |
| 217 | H5  | S   | -0.02007 | 0.30600  | -0.08960 | -0.10861 | -0.04371 |
| 218 | H5  | PX  | -0.00839 | -0.03465 | -0.10387 | 0.08944  | -0.04895 |
| 219 | H5  | PY  | -0.01047 | 0.02545  | -0.03075 | 0.00183  | -0.01598 |
| 220 | H5  | PZ  | -0.00272 | -0.02144 | -0.05465 | 0.03906  | -0.02522 |
| 221 | H7  | S   | 0.00206  | 0.35679  | -0.04896 | 0.01931  | -0.00624 |
| 222 | H7  | S   | 0.02007  | 0.30600  | -0.08960 | -0.10861 | -0.04371 |
| 223 | H7  | PX  | 0.00839  | -0.03465 | -0.10387 | 0.08944  | -0.04895 |
| 224 | H7  | PY  | 0.01047  | 0.02545  | -0.03075 | 0.00183  | -0.01598 |
| 225 | H7  | PZ  | -0.00272 | 0.02144  | 0.05465  | -0.03906 | 0.02522  |

|              |          |          |          |          |          |
|--------------|----------|----------|----------|----------|----------|
| M0:          | 136      | 137      | 138      | 139      | 140      |
| Eigenvalues: | 2.03285  | 2.07072  | 2.10565  | 2.10726  | 2.12833  |
| (ev):        | 55.31678 | 56.34722 | 57.29768 | 57.34162 | 57.91471 |

|   |    |    |          |          |         |         |         |
|---|----|----|----------|----------|---------|---------|---------|
|   |    | A  | A        | A        | A       | A       |         |
| 1 | H1 | S  | -0.03448 | -0.00721 | 0.17825 | 0.00000 | 0.23073 |
| 2 | H1 | S  | 0.08424  | 0.38995  | 0.13455 | 0.00000 | 0.47675 |
| 3 | H1 | PX | 0.02129  | -0.01379 | 0.09304 | 0.00000 | 0.02346 |

|    |    |     |          |          |          |          |          |
|----|----|-----|----------|----------|----------|----------|----------|
| 4  | H1 | PY  | 0.01617  | 0.01124  | -0.07421 | 0.00000  | 0.03635  |
| 5  | H1 | PZ  | 0.00000  | 0.00000  | 0.00000  | -0.24925 | 0.00000  |
| 6  | C1 | S   | -0.01942 | -0.01913 | -0.01747 | 0.00000  | -0.01097 |
| 7  | C1 | S   | -0.24978 | -0.23415 | -0.04903 | 0.00000  | -0.51555 |
| 8  | C1 | PX  | -0.01437 | -0.02442 | -0.07614 | 0.00000  | 0.18270  |
| 9  | C1 | PY  | -0.04443 | 0.11912  | 0.08463  | 0.00000  | 0.13625  |
| 10 | C1 | PZ  | 0.00000  | 0.00000  | 0.00000  | 0.00206  | 0.00000  |
| 11 | C1 | S   | 0.56215  | 0.63208  | 2.12566  | 0.00000  | 0.89898  |
| 12 | C1 | PX  | -0.53362 | -1.32361 | -1.03065 | 0.00000  | -1.73184 |
| 13 | C1 | PY  | 0.55078  | 0.59393  | 0.10710  | 0.00000  | 0.15503  |
| 14 | C1 | PZ  | 0.00000  | 0.00000  | 0.00000  | 0.54326  | 0.00000  |
| 15 | C1 | DXX | 0.03150  | 0.05553  | -0.05695 | 0.00000  | 0.02851  |
| 16 | C1 | DYY | 0.09710  | 0.06638  | 0.00226  | 0.00000  | 0.09033  |
| 17 | C1 | DZZ | -0.09148 | -0.02696 | 0.05990  | 0.00000  | -0.18561 |
| 18 | C1 | DXY | -0.00610 | 0.17987  | -0.15152 | 0.00000  | -0.15165 |
| 19 | C1 | DXZ | 0.00000  | 0.00000  | 0.00000  | -0.31069 | 0.00000  |
| 20 | C1 | DYZ | 0.00000  | 0.00000  | 0.00000  | -0.42950 | 0.00000  |
| 21 | C2 | S   | -0.01365 | 0.01165  | -0.01535 | 0.00000  | 0.00634  |
| 22 | C2 | S   | 0.04959  | 0.50570  | -0.23220 | 0.00000  | 0.12467  |
| 23 | C2 | PX  | 0.07250  | 0.22370  | 0.02937  | 0.00000  | 0.06567  |
| 24 | C2 | PY  | -0.02608 | -0.00310 | -0.04059 | 0.00000  | -0.14202 |
| 25 | C2 | PZ  | 0.00000  | 0.00000  | 0.00000  | 0.01620  | 0.00000  |
| 26 | C2 | S   | 0.83916  | -0.77106 | 1.09378  | 0.00000  | -0.55301 |
| 27 | C2 | PX  | -0.55355 | -1.17286 | 0.75032  | 0.00000  | -0.49157 |
| 28 | C2 | PY  | -1.35388 | -1.69391 | -0.52256 | 0.00000  | -1.05235 |
| 29 | C2 | PZ  | 0.00000  | 0.00000  | 0.00000  | -0.13725 | 0.00000  |
| 30 | C2 | DXX | -0.06816 | 0.00318  | -0.07924 | 0.00000  | -0.21487 |
| 31 | C2 | DYY | 0.08812  | -0.08685 | 0.05457  | 0.00000  | 0.13514  |
| 32 | C2 | DZZ | -0.05563 | 0.10579  | 0.09327  | 0.00000  | 0.03228  |
| 33 | C2 | DXY | 0.06123  | -0.12544 | -0.16307 | 0.00000  | 0.00472  |
| 34 | C2 | DXZ | 0.00000  | 0.00000  | 0.00000  | -0.08891 | 0.00000  |
| 35 | C2 | DYZ | 0.00000  | 0.00000  | 0.00000  | 0.14446  | 0.00000  |
| 36 | C3 | S   | 0.03410  | 0.05226  | 0.01674  | 0.00000  | 0.03701  |
| 37 | C3 | S   | 0.20335  | 0.70247  | 0.24908  | 0.00000  | 0.23368  |
| 38 | C3 | PX  | 0.04510  | -0.23067 | 0.02949  | 0.00000  | 0.08096  |
| 39 | C3 | PY  | 0.09415  | -0.13942 | -0.09311 | 0.00000  | -0.14688 |
| 40 | C3 | PZ  | 0.00000  | 0.00000  | 0.00000  | -0.04023 | 0.00000  |
| 41 | C3 | S   | -4.34098 | -6.41876 | -1.98770 | 0.00000  | -5.23912 |
| 42 | C3 | PX  | 2.04117  | 2.62263  | 0.23932  | 0.00000  | 1.02869  |
| 43 | C3 | PY  | 0.95943  | 3.30769  | 0.52916  | 0.00000  | 3.33352  |
| 44 | C3 | PZ  | 0.00000  | 0.00000  | 0.00000  | -0.85225 | 0.00000  |
| 45 | C3 | DXX | 0.23600  | -0.06188 | 0.08297  | 0.00000  | 0.03713  |
| 46 | C3 | DYY | -0.03397 | -0.02975 | -0.09744 | 0.00000  | 0.05690  |
| 47 | C3 | DZZ | -0.26662 | -0.00725 | 0.04716  | 0.00000  | -0.18925 |
| 48 | C3 | DXY | 0.07952  | -0.18937 | 0.08991  | 0.00000  | 0.19302  |
| 49 | C3 | DXZ | 0.00000  | 0.00000  | 0.00000  | -0.01238 | 0.00000  |
| 50 | C3 | DYZ | 0.00000  | 0.00000  | 0.00000  | -0.04772 | 0.00000  |
| 51 | C4 | S   | 0.00392  | 0.01356  | 0.00386  | 0.00000  | 0.01169  |
| 52 | C4 | S   | -0.05992 | -0.03159 | -0.27160 | 0.00000  | 0.21100  |
| 53 | C4 | PX  | -0.13273 | 0.14943  | 0.20262  | 0.00000  | -0.05012 |
| 54 | C4 | PY  | 0.03681  | -0.00319 | 0.08662  | 0.00000  | -0.02290 |
| 55 | C4 | PZ  | 0.00000  | 0.00000  | 0.00000  | 0.00743  | 0.00000  |
| 56 | C4 | S   | -1.57040 | -2.57958 | 0.99230  | 0.00000  | -1.05173 |
| 57 | C4 | PX  | -0.10874 | -0.60283 | -2.27189 | 0.00000  | -0.18199 |

|     |    |     |          |          |          |          |          |
|-----|----|-----|----------|----------|----------|----------|----------|
| 58  | C4 | PY  | -0.98423 | 0.65645  | 2.07045  | 0.00000  | 2.62256  |
| 59  | C4 | PZ  | 0.00000  | 0.00000  | 0.00000  | -0.23692 | 0.00000  |
| 60  | C4 | DXX | 0.05621  | 0.08204  | 0.21792  | 0.00000  | 0.05418  |
| 61  | C4 | DYY | -0.00396 | -0.01121 | -0.01206 | 0.00000  | 0.04858  |
| 62  | C4 | DZZ | -0.09088 | -0.07921 | -0.25609 | 0.00000  | -0.17682 |
| 63  | C4 | DXY | 0.06085  | 0.25109  | 0.13333  | 0.00000  | -0.17212 |
| 64  | C4 | DXZ | 0.00000  | 0.00000  | 0.00000  | -0.22570 | 0.00000  |
| 65  | C4 | DYZ | 0.00000  | 0.00000  | 0.00000  | 0.04719  | 0.00000  |
| 66  | C5 | S   | -0.00346 | -0.01136 | 0.02266  | 0.00000  | -0.01030 |
| 67  | C5 | S   | -0.09338 | -0.33730 | 0.08408  | 0.00000  | -0.13239 |
| 68  | C5 | PX  | -0.02960 | -0.14071 | -0.13890 | 0.00000  | 0.09555  |
| 69  | C5 | PY  | -0.02784 | -0.01203 | -0.11831 | 0.00000  | 0.07490  |
| 70  | C5 | PZ  | 0.00000  | 0.00000  | 0.00000  | -0.03768 | 0.00000  |
| 71  | C5 | S   | 1.07778  | 2.35907  | -1.61752 | 0.00000  | 1.68230  |
| 72  | C5 | PX  | -0.31146 | 0.82408  | -0.61103 | 0.00000  | 0.33090  |
| 73  | C5 | PY  | 0.40231  | -1.33629 | -0.57910 | 0.00000  | -1.51124 |
| 74  | C5 | PZ  | 0.00000  | 0.00000  | 0.00000  | 0.04699  | 0.00000  |
| 75  | C5 | DXX | 0.02595  | 0.18740  | 0.26238  | 0.00000  | -0.10495 |
| 76  | C5 | DYY | 0.09224  | -0.12665 | -0.16645 | 0.00000  | 0.10356  |
| 77  | C5 | DZZ | -0.16361 | -0.02398 | -0.13518 | 0.00000  | -0.00695 |
| 78  | C5 | DXY | -0.00292 | -0.00927 | 0.15535  | 0.00000  | 0.11165  |
| 79  | C5 | DXZ | 0.00000  | 0.00000  | 0.00000  | -0.07117 | 0.00000  |
| 80  | C5 | DYZ | 0.00000  | 0.00000  | 0.00000  | 0.01026  | 0.00000  |
| 81  | C6 | S   | -0.01956 | -0.03695 | 0.01610  | 0.00000  | -0.02773 |
| 82  | C6 | S   | -0.46839 | -0.31063 | -0.07208 | 0.00000  | -0.41972 |
| 83  | C6 | PX  | -0.29634 | -0.01067 | -0.03963 | 0.00000  | -0.14666 |
| 84  | C6 | PY  | 0.02175  | 0.07796  | -0.08085 | 0.00000  | 0.05143  |
| 85  | C6 | PZ  | 0.00000  | 0.00000  | 0.00000  | 0.00468  | 0.00000  |
| 86  | C6 | S   | 0.74896  | 4.92261  | -0.85754 | 0.00000  | 2.94850  |
| 87  | C6 | PX  | 3.47371  | 3.80549  | 1.35323  | 0.00000  | 2.93571  |
| 88  | C6 | PY  | 1.81077  | -1.04675 | 0.15515  | 0.00000  | -0.61196 |
| 89  | C6 | PZ  | 0.00000  | 0.00000  | 0.00000  | 0.45460  | 0.00000  |
| 90  | C6 | DXX | 0.17530  | -0.16320 | 0.02764  | 0.00000  | 0.23644  |
| 91  | C6 | DYY | -0.10381 | 0.02439  | -0.09072 | 0.00000  | -0.13939 |
| 92  | C6 | DZZ | -0.08069 | 0.19921  | 0.04222  | 0.00000  | -0.01182 |
| 93  | C6 | DXY | 0.15134  | -0.01514 | 0.00561  | 0.00000  | 0.02107  |
| 94  | C6 | DXZ | 0.00000  | 0.00000  | 0.00000  | 0.23247  | 0.00000  |
| 95  | C6 | DYZ | 0.00000  | 0.00000  | 0.00000  | 0.10797  | 0.00000  |
| 96  | C7 | S   | -0.02561 | -0.03306 | -0.00325 | 0.00000  | -0.04075 |
| 97  | C7 | S   | -0.61724 | -0.46556 | -0.23577 | 0.00000  | -0.16601 |
| 98  | C7 | PX  | 0.17831  | -0.00891 | 0.03287  | 0.00000  | -0.15200 |
| 99  | C7 | PY  | 0.02746  | -0.11014 | 0.11935  | 0.00000  | -0.04144 |
| 100 | C7 | PZ  | 0.00000  | 0.00000  | 0.00000  | -0.02748 | 0.00000  |
| 101 | C7 | S   | 2.85837  | 5.31405  | 1.25287  | 0.00000  | 5.11123  |
| 102 | C7 | PX  | -2.63996 | -3.14134 | -0.59520 | 0.00000  | -2.57323 |
| 103 | C7 | PY  | -0.42153 | -0.34975 | -0.10347 | 0.00000  | 0.24508  |
| 104 | C7 | PZ  | 0.00000  | 0.00000  | 0.00000  | 0.59243  | 0.00000  |
| 105 | C7 | DXX | 0.02752  | -0.12835 | -0.05873 | 0.00000  | 0.13748  |
| 106 | C7 | DYY | 0.11769  | 0.01172  | 0.07021  | 0.00000  | -0.17717 |
| 107 | C7 | DZZ | -0.12555 | 0.16343  | 0.03745  | 0.00000  | 0.14348  |
| 108 | C7 | DXY | 0.13079  | -0.20453 | 0.16985  | 0.00000  | -0.14731 |
| 109 | C7 | DXZ | 0.00000  | 0.00000  | 0.00000  | -0.43207 | 0.00000  |
| 110 | C7 | DYZ | 0.00000  | 0.00000  | 0.00000  | 0.19020  | 0.00000  |
| 111 | O1 | S   | -0.05763 | -0.00178 | 0.04418  | 0.00000  | 0.03133  |



|     |    |     |          |          |          |          |          |
|-----|----|-----|----------|----------|----------|----------|----------|
| 112 | O1 | S   | -0.78193 | -0.17534 | 0.74869  | 0.00000  | 0.43789  |
| 113 | O1 | PX  | -0.09522 | 0.00449  | -0.14016 | 0.00000  | -0.01551 |
| 114 | O1 | PY  | 0.08103  | 0.23142  | -0.11974 | 0.00000  | -0.17182 |
| 115 | O1 | PZ  | 0.00000  | 0.00000  | 0.00000  | 0.00973  | 0.00000  |
| 116 | O1 | S   | 2.74907  | 0.29491  | -2.71966 | 0.00000  | -1.88109 |
| 117 | O1 | PX  | 0.49055  | -0.12603 | 0.54307  | 0.00000  | 0.11576  |
| 118 | O1 | PY  | -0.49113 | -0.74541 | 0.91635  | 0.00000  | 0.91641  |
| 119 | O1 | PZ  | 0.00000  | 0.00000  | 0.00000  | -0.00855 | 0.00000  |
| 120 | O1 | DXX | -0.32759 | 0.05998  | 0.39227  | 0.00000  | 0.10067  |
| 121 | O1 | DYY | -0.25084 | -0.06651 | 0.29019  | 0.00000  | 0.17800  |
| 122 | O1 | DZZ | 0.01768  | -0.06624 | -0.19134 | 0.00000  | -0.01601 |
| 123 | O1 | DXY | 0.02611  | -0.10222 | -0.23070 | 0.00000  | 0.13118  |
| 124 | O1 | DXZ | 0.00000  | 0.00000  | 0.00000  | -0.15048 | 0.00000  |
| 125 | O1 | DYZ | 0.00000  | 0.00000  | 0.00000  | -0.15309 | 0.00000  |
| 126 | H4 | S   | -0.25746 | 0.09322  | 0.18628  | 0.00000  | 0.22275  |
| 127 | H4 | S   | -0.25951 | 0.38222  | 0.06122  | 0.00000  | 0.26451  |
| 128 | H4 | PX  | 0.04730  | -0.07815 | -0.13265 | 0.00000  | -0.01627 |
| 129 | H4 | PY  | 0.00397  | -0.06226 | -0.05955 | 0.00000  | 0.06567  |
| 130 | H4 | PZ  | 0.00000  | 0.00000  | 0.00000  | 0.03748  | 0.00000  |
| 131 | N1 | S   | -0.03781 | 0.05386  | -0.01068 | 0.00000  | 0.01365  |
| 132 | N1 | S   | -0.49112 | 0.56409  | -0.10941 | 0.00000  | 0.13969  |
| 133 | N1 | PX  | 0.08456  | -0.01806 | 0.08891  | 0.00000  | -0.02956 |
| 134 | N1 | PY  | -0.01982 | -0.06892 | -0.00829 | 0.00000  | 0.02635  |
| 135 | N1 | PZ  | 0.00000  | 0.00000  | 0.00000  | 0.03211  | 0.00000  |
| 136 | N1 | S   | 2.71623  | -3.21965 | 0.64585  | 0.00000  | -0.96737 |
| 137 | N1 | PX  | -0.37964 | -1.21221 | -0.36573 | 0.00000  | -0.47553 |
| 138 | N1 | PY  | 1.26511  | 0.01602  | 0.47881  | 0.00000  | 0.31147  |
| 139 | N1 | PZ  | 0.00000  | 0.00000  | 0.00000  | -0.04398 | 0.00000  |
| 140 | N1 | DXX | -0.10198 | 0.12334  | -0.09700 | 0.00000  | 0.22217  |
| 141 | N1 | DYY | -0.06362 | 0.02542  | -0.01897 | 0.00000  | -0.09688 |
| 142 | N1 | DZZ | -0.01327 | 0.02734  | 0.10784  | 0.00000  | -0.07688 |
| 143 | N1 | DXY | -0.24342 | -0.02922 | -0.07525 | 0.00000  | -0.03767 |
| 144 | N1 | DXZ | 0.00000  | 0.00000  | 0.00000  | 0.09051  | 0.00000  |
| 145 | N1 | DYZ | 0.00000  | 0.00000  | 0.00000  | -0.20354 | 0.00000  |
| 146 | H6 | S   | -0.21959 | -0.16069 | 0.17855  | 0.00000  | 0.04915  |
| 147 | H6 | S   | -0.37741 | -0.50846 | 0.05504  | 0.00000  | -0.25545 |
| 148 | H6 | PX  | 0.02269  | 0.00485  | -0.07138 | 0.00000  | -0.02751 |
| 149 | H6 | PY  | -0.05362 | -0.02451 | -0.02898 | 0.00000  | -0.06372 |
| 150 | H6 | PZ  | 0.00000  | 0.00000  | 0.00000  | 0.00742  | 0.00000  |
| 151 | C8 | S   | 0.02196  | 0.02079  | 0.01376  | 0.00000  | 0.00844  |
| 152 | C8 | S   | 0.11055  | 0.59617  | 0.09381  | 0.00000  | 0.24401  |
| 153 | C8 | PX  | -0.03287 | 0.02380  | -0.05848 | 0.00000  | 0.07374  |
| 154 | C8 | PY  | -0.09972 | 0.21029  | -0.09768 | 0.00000  | 0.16669  |
| 155 | C8 | PZ  | 0.00000  | 0.00000  | 0.00000  | -0.01769 | 0.00000  |
| 156 | C8 | S   | -1.59171 | -1.40113 | -0.61659 | 0.00000  | -0.81212 |
| 157 | C8 | PX  | -0.34136 | -2.39707 | -0.27558 | 0.00000  | -1.20472 |
| 158 | C8 | PY  | -2.19811 | -2.75568 | -0.10204 | 0.00000  | -3.17120 |
| 159 | C8 | PZ  | 0.00000  | 0.00000  | 0.00000  | -0.39478 | 0.00000  |
| 160 | C8 | DXX | 0.24502  | 0.14046  | 0.07842  | 0.00000  | 0.04411  |
| 161 | C8 | DYY | -0.04858 | -0.18139 | -0.05080 | 0.00000  | -0.00696 |
| 162 | C8 | DZZ | -0.26958 | 0.08222  | -0.03080 | 0.00000  | -0.06965 |
| 163 | C8 | DXY | 0.10922  | -0.14347 | 0.18549  | 0.00000  | -0.34206 |
| 164 | C8 | DXZ | 0.00000  | 0.00000  | 0.00000  | -0.12092 | 0.00000  |
| 165 | C8 | DYZ | 0.00000  | 0.00000  | 0.00000  | -0.08632 | 0.00000  |

|     |     |     |          |          |          |          |          |
|-----|-----|-----|----------|----------|----------|----------|----------|
| 166 | H8  | S   | 0.27341  | 0.26092  | 0.07871  | 0.00000  | -0.03590 |
| 167 | H8  | S   | 0.72590  | 0.66012  | 0.07460  | 0.00000  | 0.60466  |
| 168 | H8  | PX  | 0.05971  | 0.04874  | 0.05117  | 0.00000  | 0.01455  |
| 169 | H8  | PY  | 0.05328  | -0.15815 | 0.13337  | 0.00000  | -0.04120 |
| 170 | H8  | PZ  | 0.00000  | 0.00000  | 0.00000  | -0.25810 | 0.00000  |
| 171 | C10 | S   | -0.00968 | 0.00742  | -0.00345 | 0.00000  | 0.00374  |
| 172 | C10 | S   | -0.09720 | 0.01645  | 0.00606  | 0.00000  | -0.11704 |
| 173 | C10 | PX  | 0.02566  | -0.06013 | 0.02663  | 0.00000  | -0.03224 |
| 174 | C10 | PY  | -0.04340 | -0.03203 | 0.05673  | 0.00000  | -0.20323 |
| 175 | C10 | PZ  | 0.00000  | 0.00000  | 0.00000  | -0.00895 | 0.00000  |
| 176 | C10 | S   | -0.82189 | -1.27583 | 0.18309  | 0.00000  | -1.75730 |
| 177 | C10 | PX  | 0.30374  | 1.49318  | 0.11266  | 0.00000  | 0.86807  |
| 178 | C10 | PY  | -0.42899 | -0.18857 | 0.02126  | 0.00000  | -0.44100 |
| 179 | C10 | PZ  | 0.00000  | 0.00000  | 0.00000  | 0.17644  | 0.00000  |
| 180 | C10 | DXX | 0.18124  | -0.02434 | 0.10830  | 0.00000  | -0.07608 |
| 181 | C10 | DYY | -0.03297 | -0.03282 | -0.08347 | 0.00000  | 0.10982  |
| 182 | C10 | DZZ | -0.16646 | 0.10168  | 0.00001  | 0.00000  | -0.08044 |
| 183 | C10 | DXY | 0.03032  | 0.15130  | -0.07213 | 0.00000  | 0.22473  |
| 184 | C10 | DXZ | 0.00000  | 0.00000  | 0.00000  | -0.05276 | 0.00000  |
| 185 | C10 | DYZ | 0.00000  | 0.00000  | 0.00000  | 0.21613  | 0.00000  |
| 186 | H16 | S   | -0.16312 | -0.11662 | -0.16277 | 0.00000  | 0.09435  |
| 187 | H16 | S   | -0.08668 | -0.46007 | 0.01547  | 0.00000  | -0.31654 |
| 188 | H16 | PX  | -0.02594 | 0.02848  | -0.03840 | 0.00000  | 0.05477  |
| 189 | H16 | PY  | 0.05332  | 0.01223  | 0.03832  | 0.00000  | -0.02553 |
| 190 | H16 | PZ  | 0.00000  | 0.00000  | 0.00000  | -0.05409 | 0.00000  |
| 191 | H18 | S   | -0.07205 | 0.14321  | 0.05328  | 0.00000  | -0.05727 |
| 192 | H18 | S   | 0.01140  | 0.47442  | -0.00808 | 0.00000  | 0.31061  |
| 193 | H18 | PX  | -0.02974 | -0.02161 | -0.06524 | 0.00000  | 0.07039  |
| 194 | H18 | PY  | 0.06063  | 0.05749  | 0.02486  | 0.00000  | 0.04550  |
| 195 | H18 | PZ  | 0.00000  | 0.00000  | 0.00000  | -0.07067 | 0.00000  |
| 196 | C9  | S   | 0.02235  | -0.00710 | -0.02380 | 0.00000  | 0.00776  |
| 197 | C9  | S   | 0.26556  | -0.01795 | -0.28826 | 0.00000  | 0.03869  |
| 198 | C9  | PX  | 0.08222  | -0.04296 | 0.04885  | 0.00000  | 0.03835  |
| 199 | C9  | PY  | 0.01108  | -0.00436 | 0.05331  | 0.00000  | -0.02238 |
| 200 | C9  | PZ  | 0.00000  | 0.00000  | 0.00000  | 0.00622  | 0.00000  |
| 201 | C9  | S   | -1.24455 | 0.32265  | 0.55968  | 0.00000  | -0.21714 |
| 202 | C9  | PX  | 0.22658  | -0.26653 | 0.03223  | 0.00000  | 0.13574  |
| 203 | C9  | PY  | 0.27810  | 0.14373  | -0.20047 | 0.00000  | -0.01304 |
| 204 | C9  | PZ  | 0.00000  | 0.00000  | 0.00000  | 0.12362  | 0.00000  |
| 205 | C9  | DXX | 0.02964  | 0.15804  | -0.13671 | 0.00000  | -0.05399 |
| 206 | C9  | DYY | -0.09019 | -0.06322 | 0.14065  | 0.00000  | 0.01224  |
| 207 | C9  | DZZ | 0.06480  | -0.09212 | -0.04586 | 0.00000  | 0.01953  |
| 208 | C9  | DXY | -0.13743 | -0.11995 | 0.04306  | 0.00000  | 0.13047  |
| 209 | C9  | DXZ | 0.00000  | 0.00000  | 0.00000  | 0.02521  | 0.00000  |
| 210 | C9  | DYZ | 0.00000  | 0.00000  | 0.00000  | -0.05684 | 0.00000  |
| 211 | H3  | S   | 0.13263  | -0.08223 | -0.13510 | 0.00000  | 0.08020  |
| 212 | H3  | S   | 0.06284  | -0.08895 | 0.03811  | 0.00000  | -0.01309 |
| 213 | H3  | PX  | -0.08092 | -0.15055 | 0.01286  | 0.00000  | 0.12924  |
| 214 | H3  | PY  | 0.01139  | -0.02649 | -0.04476 | 0.00000  | 0.03725  |
| 215 | H3  | PZ  | 0.00000  | 0.00000  | 0.00000  | 0.02424  | 0.00000  |
| 216 | H5  | S   | 0.08440  | 0.00085  | -0.03417 | 0.06195  | 0.02934  |
| 217 | H5  | S   | 0.17209  | 0.03433  | -0.13043 | 0.03865  | -0.05227 |
| 218 | H5  | PX  | 0.03023  | 0.07611  | -0.02956 | 0.07033  | -0.05022 |
| 219 | H5  | PY  | 0.03074  | 0.03617  | -0.01901 | 0.07033  | -0.01467 |

|     |    |    |          |          |          |          |          |
|-----|----|----|----------|----------|----------|----------|----------|
| 220 | H5 | PZ | 0.02305  | 0.03512  | -0.02572 | -0.00068 | -0.02844 |
| 221 | H7 | S  | 0.08440  | 0.00085  | -0.03417 | -0.06195 | 0.02934  |
| 222 | H7 | S  | 0.17209  | 0.03433  | -0.13043 | -0.03865 | -0.05227 |
| 223 | H7 | PX | 0.03023  | 0.07611  | -0.02956 | -0.07033 | -0.05022 |
| 224 | H7 | PY | 0.03074  | 0.03617  | -0.01901 | -0.07033 | -0.01467 |
| 225 | H7 | PZ | -0.02305 | -0.03512 | 0.02572  | -0.00068 | 0.02844  |

|              |          |          |          |          |          |
|--------------|----------|----------|----------|----------|----------|
| MO:          | 141      | 142      | 143      | 144      | 145      |
| Eigenvalues: | 2.16374  | 2.16713  | 2.17488  | 2.17972  | 2.21319  |
| (ev):        | 58.87839 | 58.97055 | 59.18163 | 59.31313 | 60.22393 |

|    |    |     | A        | A        | A        | A        | A        |
|----|----|-----|----------|----------|----------|----------|----------|
| 1  | H1 | S   | 0.17763  | 0.00000  | 0.22691  | -0.32980 | 0.00000  |
| 2  | H1 | S   | -0.51849 | 0.00000  | 0.29965  | -0.06370 | 0.00000  |
| 3  | H1 | PX  | 0.08963  | 0.00000  | 0.05662  | -0.03069 | 0.00000  |
| 4  | H1 | PY  | 0.01433  | 0.00000  | 0.00184  | -0.12010 | 0.00000  |
| 5  | H1 | PZ  | 0.00000  | -0.17654 | 0.00000  | 0.00000  | -0.07086 |
| 6  | C1 | S   | 0.01484  | 0.00000  | 0.00385  | -0.00212 | 0.00000  |
| 7  | C1 | S   | 0.21476  | 0.00000  | -0.26185 | 0.13677  | 0.00000  |
| 8  | C1 | PX  | -0.07084 | 0.00000  | 0.09117  | 0.04394  | 0.00000  |
| 9  | C1 | PY  | -0.14740 | 0.00000  | 0.03492  | -0.28627 | 0.00000  |
| 10 | C1 | PZ  | 0.00000  | 0.01409  | 0.00000  | 0.00000  | 0.02604  |
| 11 | C1 | S   | -1.00866 | 0.00000  | -1.32729 | -0.22142 | 0.00000  |
| 12 | C1 | PX  | 1.18872  | 0.00000  | -0.78791 | 0.56419  | 0.00000  |
| 13 | C1 | PY  | 0.12823  | 0.00000  | 0.32984  | 0.45213  | 0.00000  |
| 14 | C1 | PZ  | 0.00000  | 0.29955  | 0.00000  | 0.00000  | 0.09289  |
| 15 | C1 | DXX | -0.25805 | 0.00000  | -0.03253 | 0.22211  | 0.00000  |
| 16 | C1 | DYY | 0.16253  | 0.00000  | 0.07574  | -0.18841 | 0.00000  |
| 17 | C1 | DZZ | 0.14687  | 0.00000  | -0.01151 | -0.04794 | 0.00000  |
| 18 | C1 | DXY | -0.12071 | 0.00000  | -0.14835 | 0.01066  | 0.00000  |
| 19 | C1 | DXZ | 0.00000  | -0.33103 | 0.00000  | 0.00000  | -0.15910 |
| 20 | C1 | DYZ | 0.00000  | 0.20695  | 0.00000  | 0.00000  | 0.16736  |
| 21 | C2 | S   | 0.00370  | 0.00000  | 0.02714  | 0.00961  | 0.00000  |
| 22 | C2 | S   | 0.09322  | 0.00000  | 0.41730  | -0.10509 | 0.00000  |
| 23 | C2 | PX  | 0.10347  | 0.00000  | 0.10261  | -0.07807 | 0.00000  |
| 24 | C2 | PY  | -0.02725 | 0.00000  | -0.02777 | 0.04794  | 0.00000  |
| 25 | C2 | PZ  | 0.00000  | 0.04100  | 0.00000  | 0.00000  | -0.01664 |
| 26 | C2 | S   | 0.23103  | 0.00000  | -1.61310 | -0.84827 | 0.00000  |
| 27 | C2 | PX  | -0.06229 | 0.00000  | -1.79777 | 0.13401  | 0.00000  |
| 28 | C2 | PY  | 0.99189  | 0.00000  | -1.27371 | 0.19627  | 0.00000  |
| 29 | C2 | PZ  | 0.00000  | 0.15897  | 0.00000  | 0.00000  | -0.17268 |
| 30 | C2 | DXX | -0.19397 | 0.00000  | -0.00375 | -0.20007 | 0.00000  |
| 31 | C2 | DYY | 0.14294  | 0.00000  | -0.01651 | 0.19980  | 0.00000  |
| 32 | C2 | DZZ | 0.10767  | 0.00000  | -0.03507 | -0.00844 | 0.00000  |
| 33 | C2 | DXY | -0.01936 | 0.00000  | -0.09052 | -0.25694 | 0.00000  |
| 34 | C2 | DXZ | 0.00000  | 0.28900  | 0.00000  | 0.00000  | -0.15069 |
| 35 | C2 | DYZ | 0.00000  | -0.30696 | 0.00000  | 0.00000  | 0.02768  |
| 36 | C3 | S   | -0.00463 | 0.00000  | 0.03487  | -0.01246 | 0.00000  |
| 37 | C3 | S   | -0.44673 | 0.00000  | 0.71360  | -0.10667 | 0.00000  |
| 38 | C3 | PX  | 0.10126  | 0.00000  | -0.10456 | -0.03832 | 0.00000  |
| 39 | C3 | PY  | 0.08747  | 0.00000  | -0.32422 | 0.17174  | 0.00000  |
| 40 | C3 | PZ  | 0.00000  | 0.00993  | 0.00000  | 0.00000  | 0.00895  |
| 41 | C3 | S   | 3.79486  | 0.00000  | -5.27719 | 0.82740  | 0.00000  |
| 42 | C3 | PX  | -0.69916 | 0.00000  | 1.85011  | -0.59696 | 0.00000  |

|    |    |     |          |          |          |          |          |
|----|----|-----|----------|----------|----------|----------|----------|
| 43 | C3 | PY  | -2.16063 | 0.00000  | 3.59313  | -0.51620 | 0.00000  |
| 44 | C3 | PZ  | 0.00000  | 0.11195  | 0.00000  | 0.00000  | 0.04388  |
| 45 | C3 | DXX | 0.01136  | 0.00000  | -0.02602 | 0.22995  | 0.00000  |
| 46 | C3 | DYY | -0.02284 | 0.00000  | -0.01939 | -0.16297 | 0.00000  |
| 47 | C3 | DZZ | 0.07022  | 0.00000  | 0.06162  | -0.04916 | 0.00000  |
| 48 | C3 | DXY | 0.08066  | 0.00000  | 0.17239  | -0.25588 | 0.00000  |
| 49 | C3 | DXZ | 0.00000  | -0.28929 | 0.00000  | 0.00000  | 0.06338  |
| 50 | C3 | DYZ | 0.00000  | -0.13679 | 0.00000  | 0.00000  | -0.09794 |
| 51 | C4 | S   | 0.01042  | 0.00000  | 0.02244  | 0.00291  | 0.00000  |
| 52 | C4 | S   | -0.19777 | 0.00000  | 0.17250  | -0.04731 | 0.00000  |
| 53 | C4 | PX  | -0.00379 | 0.00000  | -0.13322 | 0.08780  | 0.00000  |
| 54 | C4 | PY  | 0.12520  | 0.00000  | 0.05093  | -0.00884 | 0.00000  |
| 55 | C4 | PZ  | 0.00000  | -0.10475 | 0.00000  | 0.00000  | -0.03043 |
| 56 | C4 | S   | -0.02677 | 0.00000  | -2.36528 | -0.04804 | 0.00000  |
| 57 | C4 | PX  | 0.28051  | 0.00000  | 1.49114  | 0.25397  | 0.00000  |
| 58 | C4 | PY  | -2.97318 | 0.00000  | 0.18486  | -0.33591 | 0.00000  |
| 59 | C4 | PZ  | 0.00000  | -0.54353 | 0.00000  | 0.00000  | -0.18606 |
| 60 | C4 | DXX | 0.26443  | 0.00000  | 0.02136  | -0.01744 | 0.00000  |
| 61 | C4 | DYY | -0.42375 | 0.00000  | -0.09287 | 0.02216  | 0.00000  |
| 62 | C4 | DZZ | 0.25839  | 0.00000  | 0.04449  | -0.01457 | 0.00000  |
| 63 | C4 | DXY | -0.03349 | 0.00000  | -0.15617 | -0.12697 | 0.00000  |
| 64 | C4 | DXZ | 0.00000  | 0.07951  | 0.00000  | 0.00000  | -0.07170 |
| 65 | C4 | DYZ | 0.00000  | 0.13231  | 0.00000  | 0.00000  | 0.01659  |
| 66 | C5 | S   | 0.01714  | 0.00000  | -0.02271 | -0.00426 | 0.00000  |
| 67 | C5 | S   | -0.13016 | 0.00000  | -0.27802 | -0.03478 | 0.00000  |
| 68 | C5 | PX  | -0.11943 | 0.00000  | 0.01866  | 0.14271  | 0.00000  |
| 69 | C5 | PY  | 0.03135  | 0.00000  | 0.00522  | 0.10864  | 0.00000  |
| 70 | C5 | PZ  | 0.00000  | 0.03086  | 0.00000  | 0.00000  | -0.00134 |
| 71 | C5 | S   | -1.02198 | 0.00000  | 3.49724  | 0.22159  | 0.00000  |
| 72 | C5 | PX  | 0.14250  | 0.00000  | 1.31114  | 0.07908  | 0.00000  |
| 73 | C5 | PY  | 1.07829  | 0.00000  | -0.90316 | -0.31857 | 0.00000  |
| 74 | C5 | PZ  | 0.00000  | 0.23641  | 0.00000  | 0.00000  | 0.14979  |
| 75 | C5 | DXX | -0.05968 | 0.00000  | -0.06693 | -0.06352 | 0.00000  |
| 76 | C5 | DYY | -0.04655 | 0.00000  | 0.04410  | -0.02657 | 0.00000  |
| 77 | C5 | DZZ | 0.11449  | 0.00000  | 0.12104  | 0.12685  | 0.00000  |
| 78 | C5 | DXY | 0.25713  | 0.00000  | 0.05784  | 0.25466  | 0.00000  |
| 79 | C5 | DXZ | 0.00000  | 0.41017  | 0.00000  | 0.00000  | 0.02564  |
| 80 | C5 | DYZ | 0.00000  | 0.11767  | 0.00000  | 0.00000  | -0.08237 |
| 81 | C6 | S   | 0.02447  | 0.00000  | -0.02474 | 0.00591  | 0.00000  |
| 82 | C6 | S   | 0.18714  | 0.00000  | -0.50177 | -0.22561 | 0.00000  |
| 83 | C6 | PX  | 0.04851  | 0.00000  | -0.10652 | 0.04783  | 0.00000  |
| 84 | C6 | PY  | -0.07072 | 0.00000  | 0.03800  | -0.10119 | 0.00000  |
| 85 | C6 | PZ  | 0.00000  | -0.09362 | 0.00000  | 0.00000  | 0.02908  |
| 86 | C6 | S   | -1.19706 | 0.00000  | 4.45622  | -0.65287 | 0.00000  |
| 87 | C6 | PX  | -1.61570 | 0.00000  | 2.66825  | -1.09255 | 0.00000  |
| 88 | C6 | PY  | 0.25322  | 0.00000  | 0.11165  | 0.52167  | 0.00000  |
| 89 | C6 | PZ  | 0.00000  | -0.40499 | 0.00000  | 0.00000  | 0.15008  |
| 90 | C6 | DXX | 0.06972  | 0.00000  | -0.09656 | 0.16566  | 0.00000  |
| 91 | C6 | DYY | -0.08363 | 0.00000  | -0.02176 | -0.07466 | 0.00000  |
| 92 | C6 | DZZ | 0.03430  | 0.00000  | 0.17476  | -0.11118 | 0.00000  |
| 93 | C6 | DXY | 0.14674  | 0.00000  | -0.15124 | -0.16340 | 0.00000  |
| 94 | C6 | DXZ | 0.00000  | 0.04169  | 0.00000  | 0.00000  | -0.10773 |
| 95 | C6 | DYZ | 0.00000  | -0.17887 | 0.00000  | 0.00000  | 0.04298  |
| 96 | C7 | S   | 0.02848  | 0.00000  | -0.02117 | -0.00915 | 0.00000  |

|     |    |     |          |          |          |          |          |
|-----|----|-----|----------|----------|----------|----------|----------|
| 97  | C7 | S   | 0.47412  | 0.00000  | -0.47359 | -0.15256 | 0.00000  |
| 98  | C7 | PX  | -0.11969 | 0.00000  | 0.04166  | -0.01231 | 0.00000  |
| 99  | C7 | PY  | -0.01109 | 0.00000  | 0.12634  | -0.20331 | 0.00000  |
| 100 | C7 | PZ  | 0.00000  | 0.01462  | 0.00000  | 0.00000  | -0.01663 |
| 101 | C7 | S   | -3.93981 | 0.00000  | 5.14135  | 0.51475  | 0.00000  |
| 102 | C7 | PX  | 2.23350  | 0.00000  | -3.02092 | -0.48979 | 0.00000  |
| 103 | C7 | PY  | 0.00720  | 0.00000  | -0.43066 | 0.30554  | 0.00000  |
| 104 | C7 | PZ  | 0.00000  | 0.01013  | 0.00000  | 0.00000  | -0.25570 |
| 105 | C7 | DXX | -0.06315 | 0.00000  | 0.14233  | -0.25933 | 0.00000  |
| 106 | C7 | DYY | -0.04217 | 0.00000  | -0.15894 | 0.26877  | 0.00000  |
| 107 | C7 | DZZ | 0.13452  | 0.00000  | 0.10701  | -0.00328 | 0.00000  |
| 108 | C7 | DXY | -0.00835 | 0.00000  | 0.14342  | 0.00149  | 0.00000  |
| 109 | C7 | DXZ | 0.00000  | -0.02430 | 0.00000  | 0.00000  | 0.21424  |
| 110 | C7 | DYZ | 0.00000  | -0.10053 | 0.00000  | 0.00000  | 0.18096  |
| 111 | O1 | S   | -0.05934 | 0.00000  | -0.01379 | -0.00725 | 0.00000  |
| 112 | O1 | S   | -0.52991 | 0.00000  | -0.26741 | -0.20666 | 0.00000  |
| 113 | O1 | PX  | 0.01077  | 0.00000  | 0.05576  | 0.05061  | 0.00000  |
| 114 | O1 | PY  | -0.11179 | 0.00000  | -0.03679 | 0.02060  | 0.00000  |
| 115 | O1 | PZ  | 0.00000  | -0.08389 | 0.00000  | 0.00000  | 0.09096  |
| 116 | O1 | S   | 2.70098  | 0.00000  | 0.86170  | 0.61075  | 0.00000  |
| 117 | O1 | PX  | -0.05230 | 0.00000  | -0.29551 | -0.14704 | 0.00000  |
| 118 | O1 | PY  | -0.83815 | 0.00000  | -0.25116 | -0.17709 | 0.00000  |
| 119 | O1 | PZ  | 0.00000  | 0.22127  | 0.00000  | 0.00000  | -0.16057 |
| 120 | O1 | DXX | -0.10089 | 0.00000  | -0.12177 | -0.07677 | 0.00000  |
| 121 | O1 | DYY | -0.33040 | 0.00000  | -0.12943 | -0.07470 | 0.00000  |
| 122 | O1 | DZZ | 0.11255  | 0.00000  | 0.10508  | 0.03579  | 0.00000  |
| 123 | O1 | DXY | -0.09137 | 0.00000  | 0.19415  | 0.08414  | 0.00000  |
| 124 | O1 | DXZ | 0.00000  | -0.00187 | 0.00000  | 0.00000  | -0.52813 |
| 125 | O1 | DYZ | 0.00000  | -0.36607 | 0.00000  | 0.00000  | -0.21113 |
| 126 | H4 | S   | 0.17321  | 0.00000  | 0.11985  | 0.29457  | 0.00000  |
| 127 | H4 | S   | -0.21268 | 0.00000  | 0.28493  | -0.00979 | 0.00000  |
| 128 | H4 | PX  | -0.07109 | 0.00000  | -0.02154 | -0.06172 | 0.00000  |
| 129 | H4 | PY  | 0.03957  | 0.00000  | 0.05855  | 0.09498  | 0.00000  |
| 130 | H4 | PZ  | 0.00000  | -0.10687 | 0.00000  | 0.00000  | -0.07675 |
| 131 | N1 | S   | -0.00349 | 0.00000  | 0.00888  | -0.00812 | 0.00000  |
| 132 | N1 | S   | -0.05711 | 0.00000  | 0.51193  | -0.21174 | 0.00000  |
| 133 | N1 | PX  | 0.03919  | 0.00000  | 0.23807  | -0.11218 | 0.00000  |
| 134 | N1 | PY  | 0.12407  | 0.00000  | -0.06707 | 0.04059  | 0.00000  |
| 135 | N1 | PZ  | 0.00000  | -0.11003 | 0.00000  | 0.00000  | 0.07413  |
| 136 | N1 | S   | 0.59194  | 0.00000  | -1.45956 | 0.99564  | 0.00000  |
| 137 | N1 | PX  | 0.32650  | 0.00000  | -0.78165 | 0.56799  | 0.00000  |
| 138 | N1 | PY  | -0.51741 | 0.00000  | 0.23623  | 0.23036  | 0.00000  |
| 139 | N1 | PZ  | 0.00000  | 0.28544  | 0.00000  | 0.00000  | -0.24860 |
| 140 | N1 | DXX | -0.09924 | 0.00000  | -0.00750 | 0.16556  | 0.00000  |
| 141 | N1 | DYY | -0.02999 | 0.00000  | 0.01792  | -0.10296 | 0.00000  |
| 142 | N1 | DZZ | 0.14484  | 0.00000  | 0.13842  | -0.05182 | 0.00000  |
| 143 | N1 | DXY | -0.11653 | 0.00000  | 0.14994  | 0.31141  | 0.00000  |
| 144 | N1 | DXZ | 0.00000  | 0.18983  | 0.00000  | 0.00000  | -0.28725 |
| 145 | N1 | DYZ | 0.00000  | 0.28185  | 0.00000  | 0.00000  | -0.05206 |
| 146 | H6 | S   | 0.18983  | 0.00000  | -0.22078 | 0.34358  | 0.00000  |
| 147 | H6 | S   | -0.00190 | 0.00000  | -0.61456 | 0.02509  | 0.00000  |
| 148 | H6 | PX  | -0.06259 | 0.00000  | 0.02284  | -0.12534 | 0.00000  |
| 149 | H6 | PY  | -0.06219 | 0.00000  | 0.01236  | 0.03426  | 0.00000  |
| 150 | H6 | PZ  | 0.00000  | -0.10628 | 0.00000  | 0.00000  | 0.10425  |

|     |     |     |          |          |          |          |          |
|-----|-----|-----|----------|----------|----------|----------|----------|
| 151 | C8  | S   | 0.00379  | 0.00000  | 0.02205  | -0.00043 | 0.00000  |
| 152 | C8  | S   | -0.04681 | 0.00000  | 0.36320  | -0.05460 | 0.00000  |
| 153 | C8  | PX  | -0.02965 | 0.00000  | -0.08546 | -0.01301 | 0.00000  |
| 154 | C8  | PY  | 0.01129  | 0.00000  | 0.16877  | -0.04643 | 0.00000  |
| 155 | C8  | PZ  | 0.00000  | -0.03450 | 0.00000  | 0.00000  | 0.06904  |
| 156 | C8  | S   | 0.77233  | 0.00000  | -1.36579 | -0.20244 | 0.00000  |
| 157 | C8  | PX  | 1.23507  | 0.00000  | -1.43423 | 0.08582  | 0.00000  |
| 158 | C8  | PY  | 1.81042  | 0.00000  | -2.73687 | -0.88397 | 0.00000  |
| 159 | C8  | PZ  | 0.00000  | -0.16952 | 0.00000  | 0.00000  | 0.43555  |
| 160 | C8  | DXX | -0.07491 | 0.00000  | -0.22323 | -0.00242 | 0.00000  |
| 161 | C8  | DYY | -0.11212 | 0.00000  | 0.12854  | 0.02936  | 0.00000  |
| 162 | C8  | DZZ | 0.23945  | 0.00000  | 0.11878  | -0.01715 | 0.00000  |
| 163 | C8  | DXY | -0.05580 | 0.00000  | 0.17703  | -0.00036 | 0.00000  |
| 164 | C8  | DXZ | 0.00000  | -0.02334 | 0.00000  | 0.00000  | 0.07708  |
| 165 | C8  | DYZ | 0.00000  | 0.01056  | 0.00000  | 0.00000  | -0.00379 |
| 166 | H8  | S   | -0.05865 | 0.00000  | 0.06336  | 0.30185  | 0.00000  |
| 167 | H8  | S   | -0.51416 | 0.00000  | 0.69522  | 0.03204  | 0.00000  |
| 168 | H8  | PX  | -0.00399 | 0.00000  | 0.00994  | 0.09913  | 0.00000  |
| 169 | H8  | PY  | -0.02126 | 0.00000  | 0.09958  | -0.08923 | 0.00000  |
| 170 | H8  | PZ  | 0.00000  | 0.02632  | 0.00000  | 0.00000  | 0.14593  |
| 171 | C10 | S   | 0.00897  | 0.00000  | 0.01024  | 0.00183  | 0.00000  |
| 172 | C10 | S   | 0.13512  | 0.00000  | -0.01885 | -0.05316 | 0.00000  |
| 173 | C10 | PX  | -0.02188 | 0.00000  | 0.03180  | 0.00887  | 0.00000  |
| 174 | C10 | PY  | 0.13202  | 0.00000  | -0.08934 | -0.08401 | 0.00000  |
| 175 | C10 | PZ  | 0.00000  | 0.00221  | 0.00000  | 0.00000  | -0.01138 |
| 176 | C10 | S   | 0.67635  | 0.00000  | -1.44600 | -0.57304 | 0.00000  |
| 177 | C10 | PX  | -0.93708 | 0.00000  | 1.24851  | 0.31112  | 0.00000  |
| 178 | C10 | PY  | 0.14443  | 0.00000  | -0.18040 | -0.12077 | 0.00000  |
| 179 | C10 | PZ  | 0.00000  | 0.10143  | 0.00000  | 0.00000  | -0.23894 |
| 180 | C10 | DXX | -0.15772 | 0.00000  | 0.00151  | 0.05696  | 0.00000  |
| 181 | C10 | DYY | 0.01829  | 0.00000  | -0.07928 | -0.04139 | 0.00000  |
| 182 | C10 | DZZ | 0.22137  | 0.00000  | 0.08431  | -0.02182 | 0.00000  |
| 183 | C10 | DXY | 0.05301  | 0.00000  | -0.26734 | -0.04772 | 0.00000  |
| 184 | C10 | DXZ | 0.00000  | -0.02138 | 0.00000  | 0.00000  | 0.06118  |
| 185 | C10 | DYZ | 0.00000  | 0.14884  | 0.00000  | 0.00000  | -0.31038 |
| 186 | H16 | S   | 0.30279  | 0.00000  | -0.29484 | -0.12333 | 0.00000  |
| 187 | H16 | S   | 0.24931  | 0.00000  | -0.28172 | -0.02941 | 0.00000  |
| 188 | H16 | PX  | 0.08459  | 0.00000  | -0.13786 | -0.02236 | 0.00000  |
| 189 | H16 | PY  | -0.00947 | 0.00000  | -0.09866 | 0.01717  | 0.00000  |
| 190 | H16 | PZ  | 0.00000  | -0.03630 | 0.00000  | 0.00000  | 0.09577  |
| 191 | H18 | S   | -0.11194 | 0.00000  | 0.47404  | 0.08268  | 0.00000  |
| 192 | H18 | S   | -0.23997 | 0.00000  | 0.27457  | 0.10213  | 0.00000  |
| 193 | H18 | PX  | 0.06139  | 0.00000  | -0.14559 | -0.02598 | 0.00000  |
| 194 | H18 | PY  | -0.05656 | 0.00000  | -0.02542 | 0.00880  | 0.00000  |
| 195 | H18 | PZ  | 0.00000  | -0.06147 | 0.00000  | 0.00000  | 0.12699  |
| 196 | C9  | S   | -0.00530 | 0.00000  | 0.01647  | 0.01416  | 0.00000  |
| 197 | C9  | S   | -0.02777 | 0.00000  | 0.13743  | 0.11371  | 0.00000  |
| 198 | C9  | PX  | 0.02996  | 0.00000  | 0.00936  | -0.01604 | 0.00000  |
| 199 | C9  | PY  | 0.06966  | 0.00000  | -0.00548 | -0.03595 | 0.00000  |
| 200 | C9  | PZ  | 0.00000  | -0.00001 | 0.00000  | 0.00000  | 0.03746  |
| 201 | C9  | S   | -0.06514 | 0.00000  | -0.33730 | -0.22133 | 0.00000  |
| 202 | C9  | PX  | -0.04888 | 0.00000  | -0.03045 | -0.02016 | 0.00000  |
| 203 | C9  | PY  | -0.11415 | 0.00000  | 0.11941  | 0.20463  | 0.00000  |
| 204 | C9  | PZ  | 0.00000  | 0.06083  | 0.00000  | 0.00000  | 0.29296  |

|     |    |     |          |          |          |          |          |
|-----|----|-----|----------|----------|----------|----------|----------|
| 205 | C9 | DXX | 0.00558  | 0.00000  | 0.09298  | 0.06281  | 0.00000  |
| 206 | C9 | DYY | -0.01701 | 0.00000  | -0.07786 | -0.03070 | 0.00000  |
| 207 | C9 | DZZ | 0.00920  | 0.00000  | -0.00279 | -0.00408 | 0.00000  |
| 208 | C9 | DXY | -0.10949 | 0.00000  | 0.02555  | 0.01527  | 0.00000  |
| 209 | C9 | DXZ | 0.00000  | 0.11252  | 0.00000  | 0.00000  | 0.09306  |
| 210 | C9 | DYZ | 0.00000  | -0.05278 | 0.00000  | 0.00000  | -0.20117 |
| 211 | H3 | S   | -0.01692 | 0.00000  | 0.08275  | 0.02397  | 0.00000  |
| 212 | H3 | S   | 0.10566  | 0.00000  | -0.03386 | -0.07637 | 0.00000  |
| 213 | H3 | PX  | -0.14990 | 0.00000  | 0.01713  | 0.01220  | 0.00000  |
| 214 | H3 | PY  | -0.04498 | 0.00000  | 0.03449  | 0.02302  | 0.00000  |
| 215 | H3 | PZ  | 0.00000  | -0.00093 | 0.00000  | 0.00000  | -0.02264 |
| 216 | H5 | S   | -0.03317 | 0.09517  | 0.04111  | 0.06799  | 0.20963  |
| 217 | H5 | S   | 0.09288  | -0.02413 | 0.05001  | 0.00466  | -0.00844 |
| 218 | H5 | PX  | 0.06999  | 0.03451  | 0.02447  | 0.01792  | 0.25349  |
| 219 | H5 | PY  | 0.01970  | 0.00748  | 0.00527  | 0.00755  | 0.16822  |
| 220 | H5 | PZ  | 0.02756  | -0.02004 | 0.00943  | 0.00873  | 0.01942  |
| 221 | H7 | S   | -0.03317 | -0.09517 | 0.04111  | 0.06799  | -0.20963 |
| 222 | H7 | S   | 0.09288  | 0.02413  | 0.05001  | 0.00466  | 0.00844  |
| 223 | H7 | PX  | 0.06999  | -0.03451 | 0.02447  | 0.01792  | -0.25349 |
| 224 | H7 | PY  | 0.01970  | -0.00748 | 0.00527  | 0.00755  | -0.16822 |
| 225 | H7 | PZ  | -0.02756 | -0.02004 | -0.00943 | -0.00873 | 0.01942  |

|              |          |          |          |          |          |
|--------------|----------|----------|----------|----------|----------|
| MO:          | 146      | 147      | 148      | 149      | 150      |
| Eigenvalues: | 2.22326  | 2.23489  | 2.28694  | 2.28708  | 2.29163  |
| (ev):        | 60.49797 | 60.81459 | 62.23095 | 62.23476 | 62.35851 |

|    |    |     | A        | A        | A        | A        | A        |
|----|----|-----|----------|----------|----------|----------|----------|
| 1  | H1 | S   | 0.00000  | -0.14262 | 0.05545  | 0.00000  | -0.32355 |
| 2  | H1 | S   | 0.00000  | 0.10920  | 0.02209  | 0.00000  | -0.15533 |
| 3  | H1 | PX  | 0.00000  | 0.00743  | 0.02900  | 0.00000  | -0.17584 |
| 4  | H1 | PY  | 0.00000  | -0.04910 | -0.08020 | 0.00000  | 0.10110  |
| 5  | H1 | PZ  | -0.10012 | 0.00000  | 0.00000  | -0.17317 | 0.00000  |
| 6  | C1 | S   | 0.00000  | -0.01564 | -0.01127 | 0.00000  | -0.00923 |
| 7  | C1 | S   | 0.00000  | 0.08324  | -0.11613 | 0.00000  | -0.17923 |
| 8  | C1 | PX  | 0.00000  | -0.07662 | 0.05182  | 0.00000  | 0.01184  |
| 9  | C1 | PY  | 0.00000  | -0.01172 | -0.09587 | 0.00000  | 0.12565  |
| 10 | C1 | PZ  | -0.04574 | 0.00000  | 0.00000  | 0.04721  | 0.00000  |
| 11 | C1 | S   | 0.00000  | 1.23753  | 0.09068  | 0.00000  | 0.62291  |
| 12 | C1 | PX  | 0.00000  | -0.32440 | -0.02964 | 0.00000  | 0.77007  |
| 13 | C1 | PY  | 0.00000  | 0.41149  | -0.73678 | 0.00000  | -1.12088 |
| 14 | C1 | PZ  | 0.37905  | 0.00000  | 0.00000  | 0.21300  | 0.00000  |
| 15 | C1 | DXX | 0.00000  | 0.11449  | 0.04976  | 0.00000  | 0.14000  |
| 16 | C1 | DYY | 0.00000  | -0.12222 | 0.04634  | 0.00000  | 0.08658  |
| 17 | C1 | DZZ | 0.00000  | 0.03181  | -0.11426 | 0.00000  | -0.29991 |
| 18 | C1 | DXY | 0.00000  | -0.01598 | -0.09458 | 0.00000  | 0.31565  |
| 19 | C1 | DXZ | -0.16008 | 0.00000  | 0.00000  | -0.12043 | 0.00000  |
| 20 | C1 | DYZ | -0.01069 | 0.00000  | 0.00000  | -0.17838 | 0.00000  |
| 21 | C2 | S   | 0.00000  | -0.01021 | -0.01557 | 0.00000  | 0.01791  |
| 22 | C2 | S   | 0.00000  | 0.02991  | -0.02704 | 0.00000  | 0.20309  |
| 23 | C2 | PX  | 0.00000  | 0.02400  | 0.05183  | 0.00000  | 0.05392  |
| 24 | C2 | PY  | 0.00000  | -0.04283 | 0.11349  | 0.00000  | 0.03087  |
| 25 | C2 | PZ  | -0.00270 | 0.00000  | 0.00000  | 0.05408  | 0.00000  |
| 26 | C2 | S   | 0.00000  | 0.02461  | 1.46213  | 0.00000  | -0.58117 |
| 27 | C2 | PX  | 0.00000  | 0.27605  | 0.54060  | 0.00000  | 0.19349  |

|    |    |     |          |          |          |          |          |
|----|----|-----|----------|----------|----------|----------|----------|
| 28 | C2 | PY  | 0.00000  | 0.13986  | -0.35456 | 0.00000  | 0.55505  |
| 29 | C2 | PZ  | -0.60043 | 0.00000  | 0.00000  | 0.30111  | 0.00000  |
| 30 | C2 | DXX | 0.00000  | -0.11521 | 0.18901  | 0.00000  | -0.32451 |
| 31 | C2 | DYY | 0.00000  | 0.11906  | -0.09810 | 0.00000  | 0.04077  |
| 32 | C2 | DZZ | 0.00000  | -0.03716 | -0.04459 | 0.00000  | 0.40468  |
| 33 | C2 | DXY | 0.00000  | 0.15704  | -0.22375 | 0.00000  | -0.06573 |
| 34 | C2 | DXZ | -0.37202 | 0.00000  | 0.00000  | 0.20171  | 0.00000  |
| 35 | C2 | DYZ | -0.09878 | 0.00000  | 0.00000  | 0.12251  | 0.00000  |
| 36 | C3 | S   | 0.00000  | -0.00385 | -0.00558 | 0.00000  | -0.00981 |
| 37 | C3 | S   | 0.00000  | 0.01130  | -0.10471 | 0.00000  | -0.30696 |
| 38 | C3 | PX  | 0.00000  | 0.10261  | -0.04779 | 0.00000  | 0.25933  |
| 39 | C3 | PY  | 0.00000  | 0.13823  | 0.17075  | 0.00000  | -0.02023 |
| 40 | C3 | PZ  | 0.02248  | 0.00000  | 0.00000  | -0.06661 | 0.00000  |
| 41 | C3 | S   | 0.00000  | -0.31730 | 0.69871  | 0.00000  | 0.63687  |
| 42 | C3 | PX  | 0.00000  | -0.22680 | -0.08602 | 0.00000  | -1.27629 |
| 43 | C3 | PY  | 0.00000  | -0.26922 | -1.68604 | 0.00000  | -1.26735 |
| 44 | C3 | PZ  | -0.38881 | 0.00000  | 0.00000  | -0.10073 | 0.00000  |
| 45 | C3 | DXX | 0.00000  | 0.18989  | 0.06226  | 0.00000  | -0.09192 |
| 46 | C3 | DYY | 0.00000  | -0.15143 | -0.08921 | 0.00000  | 0.20949  |
| 47 | C3 | DZZ | 0.00000  | -0.02753 | 0.02492  | 0.00000  | -0.16339 |
| 48 | C3 | DXY | 0.00000  | -0.00935 | 0.07548  | 0.00000  | -0.02873 |
| 49 | C3 | DXZ | 0.11844  | 0.00000  | 0.00000  | -0.04162 | 0.00000  |
| 50 | C3 | DYZ | 0.02549  | 0.00000  | 0.00000  | -0.24228 | 0.00000  |
| 51 | C4 | S   | 0.00000  | -0.01272 | -0.01064 | 0.00000  | -0.01157 |
| 52 | C4 | S   | 0.00000  | -0.14827 | -0.29194 | 0.00000  | -0.06457 |
| 53 | C4 | PX  | 0.00000  | -0.03507 | 0.03600  | 0.00000  | 0.15596  |
| 54 | C4 | PY  | 0.00000  | -0.02753 | 0.20076  | 0.00000  | -0.01163 |
| 55 | C4 | PZ  | -0.03058 | 0.00000  | 0.00000  | -0.01952 | 0.00000  |
| 56 | C4 | S   | 0.00000  | -0.30986 | 0.44543  | 0.00000  | 1.61324  |
| 57 | C4 | PX  | 0.00000  | -1.10601 | 1.07104  | 0.00000  | 0.01006  |
| 58 | C4 | PY  | 0.00000  | 0.55712  | -0.71487 | 0.00000  | -0.24502 |
| 59 | C4 | PZ  | -0.57581 | 0.00000  | 0.00000  | -0.04072 | 0.00000  |
| 60 | C4 | DXX | 0.00000  | -0.00175 | -0.02875 | 0.00000  | -0.11008 |
| 61 | C4 | DYY | 0.00000  | 0.16341  | 0.19599  | 0.00000  | 0.16438  |
| 62 | C4 | DZZ | 0.00000  | -0.20820 | -0.28547 | 0.00000  | 0.00202  |
| 63 | C4 | DXY | 0.00000  | 0.13209  | -0.00216 | 0.00000  | 0.09184  |
| 64 | C4 | DXZ | 0.19865  | 0.00000  | 0.00000  | -0.21192 | 0.00000  |
| 65 | C4 | DYZ | 0.05764  | 0.00000  | 0.00000  | 0.04857  | 0.00000  |
| 66 | C5 | S   | 0.00000  | -0.00483 | -0.01189 | 0.00000  | 0.02199  |
| 67 | C5 | S   | 0.00000  | -0.27282 | 0.01389  | 0.00000  | 0.31286  |
| 68 | C5 | PX  | 0.00000  | -0.06786 | 0.02057  | 0.00000  | 0.13724  |
| 69 | C5 | PY  | 0.00000  | 0.16745  | -0.08260 | 0.00000  | 0.00507  |
| 70 | C5 | PZ  | 0.01363  | 0.00000  | 0.00000  | -0.03900 | 0.00000  |
| 71 | C5 | S   | 0.00000  | -0.34653 | 0.38336  | 0.00000  | -1.13048 |
| 72 | C5 | PX  | 0.00000  | -0.14358 | 0.14150  | 0.00000  | -0.56951 |
| 73 | C5 | PY  | 0.00000  | -0.70230 | 1.05220  | 0.00000  | 0.29609  |
| 74 | C5 | PZ  | 0.61032  | 0.00000  | 0.00000  | -0.23353 | 0.00000  |
| 75 | C5 | DXX | 0.00000  | -0.01733 | 0.34243  | 0.00000  | -0.06001 |
| 76 | C5 | DYY | 0.00000  | 0.11661  | -0.16752 | 0.00000  | -0.12644 |
| 77 | C5 | DZZ | 0.00000  | -0.19297 | -0.15833 | 0.00000  | 0.21443  |
| 78 | C5 | DXY | 0.00000  | -0.09927 | -0.07877 | 0.00000  | 0.11292  |
| 79 | C5 | DXZ | 0.33381  | 0.00000  | 0.00000  | 0.01329  | 0.00000  |
| 80 | C5 | DYZ | -0.22428 | 0.00000  | 0.00000  | 0.25059  | 0.00000  |
| 81 | C6 | S   | 0.00000  | -0.00822 | 0.00963  | 0.00000  | 0.01492  |



|     |    |     |          |          |          |          |          |
|-----|----|-----|----------|----------|----------|----------|----------|
| 82  | C6 | S   | 0.00000  | -0.09486 | -0.06074 | 0.00000  | 0.18128  |
| 83  | C6 | PX  | 0.00000  | -0.14946 | 0.00417  | 0.00000  | 0.16987  |
| 84  | C6 | PY  | 0.00000  | 0.14807  | -0.02822 | 0.00000  | 0.09276  |
| 85  | C6 | PZ  | 0.03261  | 0.00000  | 0.00000  | -0.02195 | 0.00000  |
| 86  | C6 | S   | 0.00000  | 0.44052  | -0.86673 | 0.00000  | -1.31187 |
| 87  | C6 | PX  | 0.00000  | 0.29657  | 0.35912  | 0.00000  | -1.33146 |
| 88  | C6 | PY  | 0.00000  | -1.03465 | -0.59231 | 0.00000  | 0.59692  |
| 89  | C6 | PZ  | 0.55354  | 0.00000  | 0.00000  | -0.12485 | 0.00000  |
| 90  | C6 | DXX | 0.00000  | 0.13158  | -0.03655 | 0.00000  | 0.08737  |
| 91  | C6 | DYY | 0.00000  | -0.08033 | -0.01462 | 0.00000  | -0.16385 |
| 92  | C6 | DZZ | 0.00000  | -0.02727 | -0.05126 | 0.00000  | 0.07726  |
| 93  | C6 | DXY | 0.00000  | 0.13688  | -0.00497 | 0.00000  | 0.08181  |
| 94  | C6 | DXZ | -0.07557 | 0.00000  | 0.00000  | 0.30208  | 0.00000  |
| 95  | C6 | DYZ | 0.10995  | 0.00000  | 0.00000  | -0.02602 | 0.00000  |
| 96  | C7 | S   | 0.00000  | -0.00552 | 0.01671  | 0.00000  | -0.00647 |
| 97  | C7 | S   | 0.00000  | -0.00599 | 0.21415  | 0.00000  | -0.24068 |
| 98  | C7 | PX  | 0.00000  | -0.06307 | -0.07705 | 0.00000  | 0.19865  |
| 99  | C7 | PY  | 0.00000  | -0.13142 | 0.07705  | 0.00000  | 0.03032  |
| 100 | C7 | PZ  | -0.00198 | 0.00000  | 0.00000  | -0.03157 | 0.00000  |
| 101 | C7 | S   | 0.00000  | 0.67845  | -1.81043 | 0.00000  | -0.37445 |
| 102 | C7 | PX  | 0.00000  | -0.47447 | 1.01594  | 0.00000  | 0.24962  |
| 103 | C7 | PY  | 0.00000  | 0.20844  | -0.19031 | 0.00000  | 0.21167  |
| 104 | C7 | PZ  | 0.06569  | 0.00000  | 0.00000  | -0.18427 | 0.00000  |
| 105 | C7 | DXX | 0.00000  | 0.07335  | -0.10877 | 0.00000  | 0.15703  |
| 106 | C7 | DYY | 0.00000  | -0.00417 | 0.10476  | 0.00000  | -0.11339 |
| 107 | C7 | DZZ | 0.00000  | -0.03304 | 0.06131  | 0.00000  | -0.16364 |
| 108 | C7 | DXY | 0.00000  | 0.09858  | 0.04856  | 0.00000  | -0.02590 |
| 109 | C7 | DXZ | -0.01253 | 0.00000  | 0.00000  | 0.17405  | 0.00000  |
| 110 | C7 | DYZ | 0.13680  | 0.00000  | 0.00000  | 0.38342  | 0.00000  |
| 111 | O1 | S   | 0.00000  | -0.00087 | 0.00592  | 0.00000  | 0.01867  |
| 112 | O1 | S   | 0.00000  | -0.17456 | -0.16914 | 0.00000  | 0.16099  |
| 113 | O1 | PX  | 0.00000  | -0.07638 | -0.01933 | 0.00000  | 0.08736  |
| 114 | O1 | PY  | 0.00000  | 0.18982  | -0.00852 | 0.00000  | 0.08114  |
| 115 | O1 | PZ  | -0.14290 | 0.00000  | 0.00000  | -0.07038 | 0.00000  |
| 116 | O1 | S   | 0.00000  | 0.17012  | 0.36439  | 0.00000  | -0.70638 |
| 117 | O1 | PX  | 0.00000  | 0.34458  | -0.09333 | 0.00000  | -0.34453 |
| 118 | O1 | PY  | 0.00000  | -0.18218 | 0.15829  | 0.00000  | 0.00598  |
| 119 | O1 | PZ  | 0.35488  | 0.00000  | 0.00000  | 0.13747  | 0.00000  |
| 120 | O1 | DXX | 0.00000  | 0.08385  | -0.21205 | 0.00000  | -0.01294 |
| 121 | O1 | DYY | 0.00000  | 0.01881  | 0.02111  | 0.00000  | 0.04634  |
| 122 | O1 | DZZ | 0.00000  | -0.19774 | 0.09725  | 0.00000  | 0.05424  |
| 123 | O1 | DXY | 0.00000  | -0.20744 | 0.34796  | 0.00000  | 0.02648  |
| 124 | O1 | DXZ | 0.38158  | 0.00000  | 0.00000  | 0.26644  | 0.00000  |
| 125 | O1 | DYZ | -0.20639 | 0.00000  | 0.00000  | -0.01321 | 0.00000  |
| 126 | H4 | S   | 0.00000  | -0.04077 | -0.25563 | 0.00000  | 0.13418  |
| 127 | H4 | S   | 0.00000  | 0.21070  | -0.18691 | 0.00000  | -0.22905 |
| 128 | H4 | PX  | 0.00000  | 0.05707  | -0.05829 | 0.00000  | -0.06410 |
| 129 | H4 | PY  | 0.00000  | -0.03109 | -0.10870 | 0.00000  | 0.01214  |
| 130 | H4 | PZ  | -0.30750 | 0.00000  | 0.00000  | 0.17430  | 0.00000  |
| 131 | N1 | S   | 0.00000  | -0.00261 | 0.00184  | 0.00000  | -0.01192 |
| 132 | N1 | S   | 0.00000  | 0.11416  | -0.00346 | 0.00000  | 0.07831  |
| 133 | N1 | PX  | 0.00000  | 0.10745  | -0.01187 | 0.00000  | 0.16143  |
| 134 | N1 | PY  | 0.00000  | -0.00027 | 0.06176  | 0.00000  | 0.17205  |
| 135 | N1 | PZ  | 0.08147  | 0.00000  | 0.00000  | 0.04574  | 0.00000  |

|     |     |     |          |          |          |          |          |
|-----|-----|-----|----------|----------|----------|----------|----------|
| 136 | N1  | S   | 0.00000  | -0.19365 | 0.14197  | 0.00000  | 0.62420  |
| 137 | N1  | PX  | 0.00000  | 0.23397  | 0.07848  | 0.00000  | 0.06391  |
| 138 | N1  | PY  | 0.00000  | -0.22015 | -0.27617 | 0.00000  | -0.09102 |
| 139 | N1  | PZ  | -0.28508 | 0.00000  | 0.00000  | -0.09803 | 0.00000  |
| 140 | N1  | DXX | 0.00000  | 0.10466  | -0.12484 | 0.00000  | -0.13111 |
| 141 | N1  | DYY | 0.00000  | -0.02221 | 0.06576  | 0.00000  | 0.09370  |
| 142 | N1  | DZZ | 0.00000  | -0.01896 | 0.08005  | 0.00000  | 0.08051  |
| 143 | N1  | DXY | 0.00000  | 0.08447  | -0.14249 | 0.00000  | -0.24711 |
| 144 | N1  | DXZ | -0.16591 | 0.00000  | 0.00000  | -0.27708 | 0.00000  |
| 145 | N1  | DYZ | -0.22851 | 0.00000  | 0.00000  | 0.14154  | 0.00000  |
| 146 | H6  | S   | 0.00000  | 0.06676  | -0.05414 | 0.00000  | 0.37777  |
| 147 | H6  | S   | 0.00000  | 0.10865  | 0.05190  | 0.00000  | 0.04620  |
| 148 | H6  | PX  | 0.00000  | 0.02643  | -0.04708 | 0.00000  | -0.13825 |
| 149 | H6  | PY  | 0.00000  | -0.09897 | 0.10092  | 0.00000  | -0.03079 |
| 150 | H6  | PZ  | 0.31567  | 0.00000  | 0.00000  | -0.19892 | 0.00000  |
| 151 | C8  | S   | 0.00000  | 0.01236  | 0.02005  | 0.00000  | 0.00093  |
| 152 | C8  | S   | 0.00000  | -0.18351 | 0.05039  | 0.00000  | -0.04822 |
| 153 | C8  | PX  | 0.00000  | -0.09911 | -0.08694 | 0.00000  | 0.09224  |
| 154 | C8  | PY  | 0.00000  | 0.27013  | 0.09022  | 0.00000  | 0.04629  |
| 155 | C8  | PZ  | 0.03569  | 0.00000  | 0.00000  | 0.08933  | 0.00000  |
| 156 | C8  | S   | 0.00000  | -0.06457 | 0.20905  | 0.00000  | -0.04628 |
| 157 | C8  | PX  | 0.00000  | 0.58701  | 0.80044  | 0.00000  | 0.26896  |
| 158 | C8  | PY  | 0.00000  | -1.99822 | 0.02995  | 0.00000  | 0.58477  |
| 159 | C8  | PZ  | 0.13333  | 0.00000  | 0.00000  | 0.43544  | 0.00000  |
| 160 | C8  | DXX | 0.00000  | -0.26843 | 0.03895  | 0.00000  | -0.03501 |
| 161 | C8  | DYY | 0.00000  | 0.20651  | -0.13312 | 0.00000  | 0.01877  |
| 162 | C8  | DZZ | 0.00000  | -0.02009 | 0.15449  | 0.00000  | 0.00379  |
| 163 | C8  | DXY | 0.00000  | -0.10297 | 0.05700  | 0.00000  | 0.15612  |
| 164 | C8  | DXZ | -0.01594 | 0.00000  | 0.00000  | 0.18346  | 0.00000  |
| 165 | C8  | DYZ | -0.03582 | 0.00000  | 0.00000  | -0.03745 | 0.00000  |
| 166 | H8  | S   | 0.00000  | 0.01534  | 0.04206  | 0.00000  | -0.15275 |
| 167 | H8  | S   | 0.00000  | 0.12594  | -0.29576 | 0.00000  | 0.02778  |
| 168 | H8  | PX  | 0.00000  | 0.00516  | 0.03844  | 0.00000  | -0.10481 |
| 169 | H8  | PY  | 0.00000  | -0.00766 | -0.04340 | 0.00000  | -0.01071 |
| 170 | H8  | PZ  | -0.02374 | 0.00000  | 0.00000  | 0.15561  | 0.00000  |
| 171 | C10 | S   | 0.00000  | 0.00967  | 0.02038  | 0.00000  | 0.00144  |
| 172 | C10 | S   | 0.00000  | -0.04722 | 0.21398  | 0.00000  | 0.07172  |
| 173 | C10 | PX  | 0.00000  | 0.02769  | 0.02086  | 0.00000  | -0.03776 |
| 174 | C10 | PY  | 0.00000  | -0.14991 | 0.12029  | 0.00000  | 0.07034  |
| 175 | C10 | PZ  | -0.00790 | 0.00000  | 0.00000  | -0.02986 | 0.00000  |
| 176 | C10 | S   | 0.00000  | -1.57495 | -0.55195 | 0.00000  | 0.31208  |
| 177 | C10 | PX  | 0.00000  | 0.03730  | -0.61483 | 0.00000  | -0.00989 |
| 178 | C10 | PY  | 0.00000  | -0.00865 | -0.14183 | 0.00000  | 0.20492  |
| 179 | C10 | PZ  | -0.08641 | 0.00000  | 0.00000  | -0.26461 | 0.00000  |
| 180 | C10 | DXX | 0.00000  | -0.39387 | -0.25250 | 0.00000  | -0.04440 |
| 181 | C10 | DYY | 0.00000  | 0.24288  | 0.01467  | 0.00000  | -0.02289 |
| 182 | C10 | DZZ | 0.00000  | 0.16786  | 0.38877  | 0.00000  | 0.10693  |
| 183 | C10 | DXY | 0.00000  | -0.20136 | 0.05644  | 0.00000  | -0.14908 |
| 184 | C10 | DXZ | 0.01857  | 0.00000  | 0.00000  | 0.06973  | 0.00000  |
| 185 | C10 | DYZ | -0.12634 | 0.00000  | 0.00000  | -0.32850 | 0.00000  |
| 186 | H16 | S   | 0.00000  | 0.25310  | 0.35354  | 0.00000  | -0.02913 |
| 187 | H16 | S   | 0.00000  | 0.04068  | 0.19553  | 0.00000  | 0.01448  |
| 188 | H16 | PX  | 0.00000  | -0.01216 | 0.13923  | 0.00000  | -0.05190 |
| 189 | H16 | PY  | 0.00000  | -0.28081 | -0.01383 | 0.00000  | -0.09046 |

|     |     |     |          |          |          |          |          |
|-----|-----|-----|----------|----------|----------|----------|----------|
| 190 | H16 | PZ  | 0.04198  | 0.00000  | 0.00000  | 0.10888  | 0.00000  |
| 191 | H18 | S   | 0.00000  | 0.32680  | 0.02719  | 0.00000  | 0.15364  |
| 192 | H18 | S   | 0.00000  | 0.03711  | -0.17355 | 0.00000  | -0.01726 |
| 193 | H18 | PX  | 0.00000  | 0.06668  | 0.12033  | 0.00000  | -0.06208 |
| 194 | H18 | PY  | 0.00000  | -0.23026 | -0.18226 | 0.00000  | -0.05516 |
| 195 | H18 | PZ  | 0.05313  | 0.00000  | 0.00000  | 0.18007  | 0.00000  |
| 196 | C9  | S   | 0.00000  | 0.00322  | 0.00616  | 0.00000  | -0.01362 |
| 197 | C9  | S   | 0.00000  | 0.01309  | 0.02957  | 0.00000  | -0.04230 |
| 198 | C9  | PX  | 0.00000  | 0.01703  | 0.04176  | 0.00000  | -0.09452 |
| 199 | C9  | PY  | 0.00000  | 0.01301  | 0.01643  | 0.00000  | -0.03352 |
| 200 | C9  | PZ  | -0.03611 | 0.00000  | 0.00000  | -0.01701 | 0.00000  |
| 201 | C9  | S   | 0.00000  | -0.20096 | -0.19854 | 0.00000  | 0.53428  |
| 202 | C9  | PX  | 0.00000  | -0.00741 | 0.06689  | 0.00000  | -0.05241 |
| 203 | C9  | PY  | 0.00000  | 0.22057  | -0.22671 | 0.00000  | -0.26607 |
| 204 | C9  | PZ  | -0.12269 | 0.00000  | 0.00000  | -0.13082 | 0.00000  |
| 205 | C9  | DXX | 0.00000  | 0.01321  | 0.08145  | 0.00000  | 0.01664  |
| 206 | C9  | DYY | 0.00000  | 0.05813  | -0.18403 | 0.00000  | -0.08522 |
| 207 | C9  | DZZ | 0.00000  | -0.06211 | 0.10129  | 0.00000  | 0.05658  |
| 208 | C9  | DXY | 0.00000  | -0.07499 | 0.12355  | 0.00000  | 0.03186  |
| 209 | C9  | DXZ | 0.06043  | 0.00000  | 0.00000  | -0.05714 | 0.00000  |
| 210 | C9  | DYZ | 0.08081  | 0.00000  | 0.00000  | 0.09321  | 0.00000  |
| 211 | H3  | S   | 0.00000  | -0.08852 | 0.24417  | 0.00000  | 0.06265  |
| 212 | H3  | S   | 0.00000  | -0.02414 | 0.02218  | 0.00000  | 0.00261  |
| 213 | H3  | PX  | 0.00000  | -0.12255 | 0.20387  | 0.00000  | 0.04465  |
| 214 | H3  | PY  | 0.00000  | -0.04177 | 0.14033  | 0.00000  | 0.03897  |
| 215 | H3  | PZ  | 0.01672  | 0.00000  | 0.00000  | 0.08726  | 0.00000  |
| 216 | H5  | S   | -0.04518 | 0.07523  | -0.05001 | -0.10269 | -0.10195 |
| 217 | H5  | S   | -0.00978 | 0.00703  | 0.03150  | 0.02199  | -0.03996 |
| 218 | H5  | PX  | -0.15578 | 0.04413  | -0.05476 | -0.14918 | -0.03883 |
| 219 | H5  | PY  | -0.10848 | 0.04504  | -0.01555 | -0.02798 | 0.00730  |
| 220 | H5  | PZ  | -0.05101 | 0.00688  | -0.00682 | -0.03433 | 0.00314  |
| 221 | H7  | S   | 0.04518  | 0.07523  | -0.05001 | 0.10269  | -0.10195 |
| 222 | H7  | S   | 0.00978  | 0.00703  | 0.03150  | -0.02199 | -0.03996 |
| 223 | H7  | PX  | 0.15578  | 0.04413  | -0.05476 | 0.14918  | -0.03883 |
| 224 | H7  | PY  | 0.10848  | 0.04504  | -0.01555 | 0.02798  | 0.00730  |
| 225 | H7  | PZ  | -0.05101 | -0.00688 | 0.00682  | -0.03433 | -0.00314 |

|              |          |          |          |          |          |
|--------------|----------|----------|----------|----------|----------|
| MO:          | 151      | 152      | 153      | 154      | 155      |
| Eigenvalues: | 2.31790  | 2.32310  | 2.34457  | 2.34735  | 2.35830  |
| (ev):        | 63.07317 | 63.21490 | 63.79889 | 63.87459 | 64.17265 |

|    |    |    |          |         |          |          |          |
|----|----|----|----------|---------|----------|----------|----------|
|    |    |    | A        | A       | A        | A        | A        |
| 1  | H1 | S  | -0.10218 | 0.00000 | -0.04429 | 0.15793  | 0.00000  |
| 2  | H1 | S  | -0.05713 | 0.00000 | -0.05055 | 0.04742  | 0.00000  |
| 3  | H1 | PX | -0.03593 | 0.00000 | -0.02036 | 0.03362  | 0.00000  |
| 4  | H1 | PY | 0.00104  | 0.00000 | 0.00266  | -0.03762 | 0.00000  |
| 5  | H1 | PZ | 0.00000  | 0.01196 | 0.00000  | 0.00000  | 0.10022  |
| 6  | C1 | S  | -0.01126 | 0.00000 | 0.01630  | -0.00818 | 0.00000  |
| 7  | C1 | S  | -0.09348 | 0.00000 | 0.30023  | -0.14682 | 0.00000  |
| 8  | C1 | PX | 0.04051  | 0.00000 | -0.16126 | 0.00947  | 0.00000  |
| 9  | C1 | PY | -0.01030 | 0.00000 | 0.13040  | -0.00369 | 0.00000  |
| 10 | C1 | PZ | 0.00000  | 0.02198 | 0.00000  | 0.00000  | -0.00188 |
| 11 | C1 | S  | 1.06292  | 0.00000 | -2.09647 | 0.45790  | 0.00000  |
| 12 | C1 | PX | 0.14116  | 0.00000 | 0.68630  | -0.35288 | 0.00000  |

|    |    |     |          |          |          |          |          |
|----|----|-----|----------|----------|----------|----------|----------|
| 13 | C1 | PY  | -0.42762 | 0.00000  | 0.12908  | -0.86313 | 0.00000  |
| 14 | C1 | PZ  | 0.00000  | -0.09559 | 0.00000  | 0.00000  | -0.14130 |
| 15 | C1 | DXX | 0.00667  | 0.00000  | 0.13099  | -0.04157 | 0.00000  |
| 16 | C1 | DYY | 0.06462  | 0.00000  | -0.09748 | 0.09182  | 0.00000  |
| 17 | C1 | DZZ | -0.13955 | 0.00000  | 0.01468  | -0.05834 | 0.00000  |
| 18 | C1 | DXY | 0.08181  | 0.00000  | -0.08337 | -0.03060 | 0.00000  |
| 19 | C1 | DXZ | 0.00000  | 0.03043  | 0.00000  | 0.00000  | 0.05965  |
| 20 | C1 | DYZ | 0.00000  | 0.04740  | 0.00000  | 0.00000  | -0.04512 |
| 21 | C2 | S   | -0.02246 | 0.00000  | 0.01662  | -0.01739 | 0.00000  |
| 22 | C2 | S   | -0.38735 | 0.00000  | 0.27070  | -0.20345 | 0.00000  |
| 23 | C2 | PX  | -0.12490 | 0.00000  | 0.01627  | -0.03188 | 0.00000  |
| 24 | C2 | PY  | -0.08303 | 0.00000  | 0.16912  | -0.11372 | 0.00000  |
| 25 | C2 | PZ  | 0.00000  | -0.01003 | 0.00000  | 0.00000  | 0.01162  |
| 26 | C2 | S   | 1.07827  | 0.00000  | -1.22323 | 0.48053  | 0.00000  |
| 27 | C2 | PX  | 1.34448  | 0.00000  | -0.56250 | 0.29786  | 0.00000  |
| 28 | C2 | PY  | 1.15707  | 0.00000  | -0.62651 | -0.02070 | 0.00000  |
| 29 | C2 | PZ  | 0.00000  | -0.01861 | 0.00000  | 0.00000  | 0.06138  |
| 30 | C2 | DXX | -0.13714 | 0.00000  | -0.10269 | 0.10378  | 0.00000  |
| 31 | C2 | DYY | 0.25548  | 0.00000  | 0.05018  | 0.06160  | 0.00000  |
| 32 | C2 | DZZ | -0.19259 | 0.00000  | 0.08446  | -0.23037 | 0.00000  |
| 33 | C2 | DXY | 0.13216  | 0.00000  | -0.11690 | 0.00798  | 0.00000  |
| 34 | C2 | DXZ | 0.00000  | -0.01331 | 0.00000  | 0.00000  | 0.01922  |
| 35 | C2 | DYZ | 0.00000  | -0.02544 | 0.00000  | 0.00000  | 0.05879  |
| 36 | C3 | S   | -0.01042 | 0.00000  | 0.00985  | -0.00356 | 0.00000  |
| 37 | C3 | S   | -0.22571 | 0.00000  | 0.12268  | -0.13996 | 0.00000  |
| 38 | C3 | PX  | -0.01797 | 0.00000  | 0.14780  | -0.05489 | 0.00000  |
| 39 | C3 | PY  | 0.17636  | 0.00000  | -0.13586 | 0.08516  | 0.00000  |
| 40 | C3 | PZ  | 0.00000  | 0.00086  | 0.00000  | 0.00000  | -0.01781 |
| 41 | C3 | S   | 3.21289  | 0.00000  | 0.67411  | -1.36979 | 0.00000  |
| 42 | C3 | PX  | -0.65456 | 0.00000  | 0.23230  | -0.54183 | 0.00000  |
| 43 | C3 | PY  | -2.53555 | 0.00000  | 0.98940  | -0.03694 | 0.00000  |
| 44 | C3 | PZ  | 0.00000  | 0.09392  | 0.00000  | 0.00000  | 0.07759  |
| 45 | C3 | DXX | -0.16036 | 0.00000  | 0.05850  | 0.00835  | 0.00000  |
| 46 | C3 | DYY | 0.02649  | 0.00000  | -0.10878 | 0.04205  | 0.00000  |
| 47 | C3 | DZZ | 0.11817  | 0.00000  | 0.17438  | -0.15187 | 0.00000  |
| 48 | C3 | DXY | 0.07713  | 0.00000  | 0.22726  | -0.05501 | 0.00000  |
| 49 | C3 | DXZ | 0.00000  | -0.00296 | 0.00000  | 0.00000  | 0.06194  |
| 50 | C3 | DYZ | 0.00000  | 0.02331  | 0.00000  | 0.00000  | 0.04422  |
| 51 | C4 | S   | -0.02974 | 0.00000  | -0.00278 | 0.00500  | 0.00000  |
| 52 | C4 | S   | -0.22169 | 0.00000  | -0.21590 | 0.06718  | 0.00000  |
| 53 | C4 | PX  | 0.01206  | 0.00000  | -0.17415 | -0.06744 | 0.00000  |
| 54 | C4 | PY  | 0.02050  | 0.00000  | 0.03219  | -0.07813 | 0.00000  |
| 55 | C4 | PZ  | 0.00000  | 0.00388  | 0.00000  | 0.00000  | 0.03028  |
| 56 | C4 | S   | 1.07872  | 0.00000  | 0.45565  | -0.21355 | 0.00000  |
| 57 | C4 | PX  | -0.60658 | 0.00000  | 1.18946  | 1.15878  | 0.00000  |
| 58 | C4 | PY  | -0.54962 | 0.00000  | -0.18739 | 1.06320  | 0.00000  |
| 59 | C4 | PZ  | 0.00000  | 0.03984  | 0.00000  | 0.00000  | 0.05086  |
| 60 | C4 | DXX | 0.04904  | 0.00000  | -0.26377 | 0.04764  | 0.00000  |
| 61 | C4 | DYY | 0.17046  | 0.00000  | 0.22940  | -0.12615 | 0.00000  |
| 62 | C4 | DZZ | -0.25109 | 0.00000  | 0.01934  | 0.01751  | 0.00000  |
| 63 | C4 | DXY | 0.01077  | 0.00000  | 0.11859  | -0.01135 | 0.00000  |
| 64 | C4 | DXZ | 0.00000  | 0.03461  | 0.00000  | 0.00000  | -0.03599 |
| 65 | C4 | DYZ | 0.00000  | 0.03010  | 0.00000  | 0.00000  | -0.20498 |
| 66 | C5 | S   | -0.01252 | 0.00000  | -0.00377 | -0.01859 | 0.00000  |

|     |    |     |          |          |          |          |          |
|-----|----|-----|----------|----------|----------|----------|----------|
| 67  | C5 | S   | -0.26033 | 0.00000  | -0.07360 | -0.19217 | 0.00000  |
| 68  | C5 | PX  | -0.01211 | 0.00000  | 0.12450  | 0.03808  | 0.00000  |
| 69  | C5 | PY  | 0.23405  | 0.00000  | 0.09811  | 0.08683  | 0.00000  |
| 70  | C5 | PZ  | 0.00000  | 0.00854  | 0.00000  | 0.00000  | -0.03112 |
| 71  | C5 | S   | -1.58327 | 0.00000  | 1.52175  | 1.12825  | 0.00000  |
| 72  | C5 | PX  | -0.58638 | 0.00000  | 0.18979  | 0.53560  | 0.00000  |
| 73  | C5 | PY  | 0.04998  | 0.00000  | -0.36855 | -0.35242 | 0.00000  |
| 74  | C5 | PZ  | 0.00000  | 0.01903  | 0.00000  | 0.00000  | -0.07280 |
| 75  | C5 | DXX | -0.08394 | 0.00000  | 0.02371  | 0.06377  | 0.00000  |
| 76  | C5 | DYY | 0.28009  | 0.00000  | -0.05171 | 0.06139  | 0.00000  |
| 77  | C5 | DZZ | -0.36440 | 0.00000  | 0.07954  | -0.16078 | 0.00000  |
| 78  | C5 | DXY | -0.03784 | 0.00000  | -0.14043 | 0.06170  | 0.00000  |
| 79  | C5 | DXZ | 0.00000  | -0.00439 | 0.00000  | 0.00000  | -0.02507 |
| 80  | C5 | DYZ | 0.00000  | -0.03198 | 0.00000  | 0.00000  | 0.04386  |
| 81  | C6 | S   | 0.01376  | 0.00000  | 0.01108  | -0.01328 | 0.00000  |
| 82  | C6 | S   | 0.41536  | 0.00000  | -0.13070 | -0.07756 | 0.00000  |
| 83  | C6 | PX  | 0.05031  | 0.00000  | -0.05637 | -0.03339 | 0.00000  |
| 84  | C6 | PY  | 0.17692  | 0.00000  | -0.07515 | 0.02689  | 0.00000  |
| 85  | C6 | PZ  | 0.00000  | 0.00264  | 0.00000  | 0.00000  | 0.01269  |
| 86  | C6 | S   | -0.78433 | 0.00000  | 0.72518  | 0.10033  | 0.00000  |
| 87  | C6 | PX  | -1.39364 | 0.00000  | 0.28489  | 0.33720  | 0.00000  |
| 88  | C6 | PY  | -1.86918 | 0.00000  | 0.51621  | -1.00103 | 0.00000  |
| 89  | C6 | PZ  | 0.00000  | -0.03131 | 0.00000  | 0.00000  | -0.03428 |
| 90  | C6 | DXX | 0.10175  | 0.00000  | 0.17521  | -0.00282 | 0.00000  |
| 91  | C6 | DYY | -0.17204 | 0.00000  | -0.23954 | 0.12020  | 0.00000  |
| 92  | C6 | DZZ | 0.00051  | 0.00000  | 0.09373  | -0.16980 | 0.00000  |
| 93  | C6 | DXY | -0.03739 | 0.00000  | -0.07084 | 0.00894  | 0.00000  |
| 94  | C6 | DXZ | 0.00000  | -0.05410 | 0.00000  | 0.00000  | 0.05298  |
| 95  | C6 | DYZ | 0.00000  | -0.00372 | 0.00000  | 0.00000  | 0.00665  |
| 96  | C7 | S   | 0.03211  | 0.00000  | 0.01722  | -0.01054 | 0.00000  |
| 97  | C7 | S   | 0.58603  | 0.00000  | 0.35061  | -0.13599 | 0.00000  |
| 98  | C7 | PX  | -0.14056 | 0.00000  | -0.16288 | 0.02449  | 0.00000  |
| 99  | C7 | PY  | 0.07779  | 0.00000  | 0.14505  | -0.04390 | 0.00000  |
| 100 | C7 | PZ  | 0.00000  | 0.00449  | 0.00000  | 0.00000  | -0.00018 |
| 101 | C7 | S   | -3.84203 | 0.00000  | -0.47942 | 1.28469  | 0.00000  |
| 102 | C7 | PX  | 2.58942  | 0.00000  | 0.57121  | -0.73433 | 0.00000  |
| 103 | C7 | PY  | -0.23949 | 0.00000  | -0.65146 | 0.61989  | 0.00000  |
| 104 | C7 | PZ  | 0.00000  | -0.01658 | 0.00000  | 0.00000  | -0.02140 |
| 105 | C7 | DXX | -0.14162 | 0.00000  | 0.00572  | -0.06494 | 0.00000  |
| 106 | C7 | DYY | 0.00688  | 0.00000  | -0.15349 | 0.10456  | 0.00000  |
| 107 | C7 | DZZ | 0.11406  | 0.00000  | 0.23478  | -0.02854 | 0.00000  |
| 108 | C7 | DXY | -0.04677 | 0.00000  | 0.22207  | -0.16586 | 0.00000  |
| 109 | C7 | DXZ | 0.00000  | -0.00116 | 0.00000  | 0.00000  | 0.01274  |
| 110 | C7 | DYZ | 0.00000  | -0.05984 | 0.00000  | 0.00000  | -0.00684 |
| 111 | O1 | S   | -0.00280 | 0.00000  | -0.00275 | -0.01397 | 0.00000  |
| 112 | O1 | S   | -0.25887 | 0.00000  | 0.07557  | 0.61348  | 0.00000  |
| 113 | O1 | PX  | -0.11076 | 0.00000  | 0.31045  | 0.37728  | 0.00000  |
| 114 | O1 | PY  | 0.04654  | 0.00000  | 0.31528  | 0.03086  | 0.00000  |
| 115 | O1 | PZ  | 0.00000  | 0.00693  | 0.00000  | 0.00000  | 0.05642  |
| 116 | O1 | S   | 0.50485  | 0.00000  | -0.05018 | -1.11766 | 0.00000  |
| 117 | O1 | PX  | 0.23377  | 0.00000  | -0.64166 | -0.57186 | 0.00000  |
| 118 | O1 | PY  | -0.01879 | 0.00000  | -0.41989 | 0.18136  | 0.00000  |
| 119 | O1 | PZ  | 0.00000  | -0.02636 | 0.00000  | 0.00000  | -0.11273 |
| 120 | O1 | DXX | -0.02395 | 0.00000  | -0.09414 | -0.10911 | 0.00000  |

|     |     |     |          |          |          |          |          |
|-----|-----|-----|----------|----------|----------|----------|----------|
| 121 | O1  | DYY | -0.01851 | 0.00000  | 0.03699  | 0.14464  | 0.00000  |
| 122 | O1  | DZZ | -0.11244 | 0.00000  | 0.06020  | 0.15705  | 0.00000  |
| 123 | O1  | DXY | -0.01187 | 0.00000  | -0.06784 | 0.01876  | 0.00000  |
| 124 | O1  | DXZ | 0.00000  | -0.04139 | 0.00000  | 0.00000  | 0.06200  |
| 125 | O1  | DYZ | 0.00000  | 0.02594  | 0.00000  | 0.00000  | -0.03097 |
| 126 | H4  | S   | -0.10196 | 0.00000  | -0.08177 | 0.04808  | 0.00000  |
| 127 | H4  | S   | 0.01557  | 0.00000  | 0.06534  | 0.11186  | 0.00000  |
| 128 | H4  | PX  | 0.16823  | 0.00000  | 0.02467  | 0.04986  | 0.00000  |
| 129 | H4  | PY  | 0.05708  | 0.00000  | -0.02999 | 0.04640  | 0.00000  |
| 130 | H4  | PZ  | 0.00000  | -0.03128 | 0.00000  | 0.00000  | 0.10371  |
| 131 | N1  | S   | 0.02177  | 0.00000  | 0.00190  | 0.00132  | 0.00000  |
| 132 | N1  | S   | 0.57437  | 0.00000  | 0.31053  | -0.13652 | 0.00000  |
| 133 | N1  | PX  | 0.04172  | 0.00000  | 0.05169  | -0.04223 | 0.00000  |
| 134 | N1  | PY  | 0.23104  | 0.00000  | 0.13955  | -0.05326 | 0.00000  |
| 135 | N1  | PZ  | 0.00000  | -0.00840 | 0.00000  | 0.00000  | 0.00075  |
| 136 | N1  | S   | -2.38375 | 0.00000  | -0.58595 | 0.04343  | 0.00000  |
| 137 | N1  | PX  | -0.16259 | 0.00000  | -0.25211 | 0.25308  | 0.00000  |
| 138 | N1  | PY  | -1.14137 | 0.00000  | -0.06237 | -0.23542 | 0.00000  |
| 139 | N1  | PZ  | 0.00000  | 0.02270  | 0.00000  | 0.00000  | 0.01872  |
| 140 | N1  | DXX | 0.03242  | 0.00000  | 0.07568  | -0.03698 | 0.00000  |
| 141 | N1  | DYY | 0.02155  | 0.00000  | -0.05044 | 0.00425  | 0.00000  |
| 142 | N1  | DZZ | 0.07143  | 0.00000  | 0.07749  | -0.01058 | 0.00000  |
| 143 | N1  | DXY | 0.04264  | 0.00000  | 0.05747  | -0.01108 | 0.00000  |
| 144 | N1  | DXZ | 0.00000  | 0.02908  | 0.00000  | 0.00000  | 0.01375  |
| 145 | N1  | DYZ | 0.00000  | -0.00266 | 0.00000  | 0.00000  | -0.01187 |
| 146 | H6  | S   | 0.23511  | 0.00000  | 0.07771  | -0.07137 | 0.00000  |
| 147 | H6  | S   | 0.44772  | 0.00000  | -0.21672 | 0.11513  | 0.00000  |
| 148 | H6  | PX  | 0.03705  | 0.00000  | -0.07329 | 0.05674  | 0.00000  |
| 149 | H6  | PY  | -0.16931 | 0.00000  | 0.05666  | -0.06508 | 0.00000  |
| 150 | H6  | PZ  | 0.00000  | 0.02330  | 0.00000  | 0.00000  | -0.04036 |
| 151 | C8  | S   | 0.00749  | 0.00000  | 0.00287  | 0.01109  | 0.00000  |
| 152 | C8  | S   | 0.20854  | 0.00000  | -0.00947 | 0.19701  | 0.00000  |
| 153 | C8  | PX  | 0.07629  | 0.00000  | -0.01863 | 0.00852  | 0.00000  |
| 154 | C8  | PY  | -0.12343 | 0.00000  | -0.14076 | 0.12295  | 0.00000  |
| 155 | C8  | PZ  | 0.00000  | -0.00986 | 0.00000  | 0.00000  | -0.00103 |
| 156 | C8  | S   | 1.57230  | 0.00000  | 0.14324  | -0.34317 | 0.00000  |
| 157 | C8  | PX  | 0.29353  | 0.00000  | -0.40376 | 0.39495  | 0.00000  |
| 158 | C8  | PY  | 1.55837  | 0.00000  | 0.96670  | -1.49622 | 0.00000  |
| 159 | C8  | PZ  | 0.00000  | -0.03771 | 0.00000  | 0.00000  | -0.01102 |
| 160 | C8  | DXX | -0.00515 | 0.00000  | -0.13286 | 0.07324  | 0.00000  |
| 161 | C8  | DYY | -0.17474 | 0.00000  | 0.01752  | -0.07051 | 0.00000  |
| 162 | C8  | DZZ | 0.34784  | 0.00000  | 0.12141  | 0.04991  | 0.00000  |
| 163 | C8  | DXY | 0.08431  | 0.00000  | -0.02021 | 0.00094  | 0.00000  |
| 164 | C8  | DXZ | 0.00000  | -0.01874 | 0.00000  | 0.00000  | 0.03440  |
| 165 | C8  | DYZ | 0.00000  | 0.00865  | 0.00000  | 0.00000  | 0.00798  |
| 166 | H8  | S   | -0.07470 | 0.00000  | -0.02469 | 0.07404  | 0.00000  |
| 167 | H8  | S   | -0.71213 | 0.00000  | -0.22346 | 0.17377  | 0.00000  |
| 168 | H8  | PX  | -0.01515 | 0.00000  | 0.03116  | 0.01929  | 0.00000  |
| 169 | H8  | PY  | -0.05780 | 0.00000  | 0.13554  | -0.12114 | 0.00000  |
| 170 | H8  | PZ  | 0.00000  | -0.00509 | 0.00000  | 0.00000  | -0.00941 |
| 171 | C10 | S   | 0.01982  | 0.00000  | -0.00678 | 0.01684  | 0.00000  |
| 172 | C10 | S   | 0.19679  | 0.00000  | -0.04410 | 0.09109  | 0.00000  |
| 173 | C10 | PX  | -0.05462 | 0.00000  | 0.06253  | -0.06789 | 0.00000  |
| 174 | C10 | PY  | 0.11728  | 0.00000  | 0.03369  | -0.03206 | 0.00000  |

|     |     |     |          |          |          |          |          |
|-----|-----|-----|----------|----------|----------|----------|----------|
| 175 | C10 | PZ  | 0.00000  | 0.00361  | 0.00000  | 0.00000  | -0.00006 |
| 176 | C10 | S   | 0.29022  | 0.00000  | 0.81678  | -1.26180 | 0.00000  |
| 177 | C10 | PX  | 0.05485  | 0.00000  | -0.33654 | 0.47886  | 0.00000  |
| 178 | C10 | PY  | -0.30405 | 0.00000  | 0.00116  | -0.26769 | 0.00000  |
| 179 | C10 | PZ  | 0.00000  | 0.02729  | 0.00000  | 0.00000  | 0.00704  |
| 180 | C10 | DXX | 0.20362  | 0.00000  | 0.07762  | -0.04016 | 0.00000  |
| 181 | C10 | DYY | -0.31723 | 0.00000  | 0.01916  | -0.10843 | 0.00000  |
| 182 | C10 | DZZ | 0.17917  | 0.00000  | -0.16779 | 0.24602  | 0.00000  |
| 183 | C10 | DXY | -0.01297 | 0.00000  | 0.15023  | -0.11245 | 0.00000  |
| 184 | C10 | DXZ | 0.00000  | -0.00672 | 0.00000  | 0.00000  | 0.00075  |
| 185 | C10 | DYZ | 0.00000  | 0.03352  | 0.00000  | 0.00000  | 0.00695  |
| 186 | H16 | S   | -0.13365 | 0.00000  | 0.02344  | -0.03386 | 0.00000  |
| 187 | H16 | S   | -0.03408 | 0.00000  | 0.04732  | -0.09885 | 0.00000  |
| 188 | H16 | PX  | -0.05297 | 0.00000  | 0.07387  | -0.06578 | 0.00000  |
| 189 | H16 | PY  | 0.08918  | 0.00000  | 0.23994  | -0.19189 | 0.00000  |
| 190 | H16 | PZ  | 0.00000  | -0.01132 | 0.00000  | 0.00000  | -0.00967 |
| 191 | H18 | S   | 0.03789  | 0.00000  | -0.22880 | 0.24160  | 0.00000  |
| 192 | H18 | S   | -0.08537 | 0.00000  | -0.14806 | 0.14982  | 0.00000  |
| 193 | H18 | PX  | -0.17326 | 0.00000  | 0.12941  | -0.15888 | 0.00000  |
| 194 | H18 | PY  | 0.17039  | 0.00000  | 0.01860  | 0.03098  | 0.00000  |
| 195 | H18 | PZ  | 0.00000  | -0.02147 | 0.00000  | 0.00000  | 0.00436  |
| 196 | C9  | S   | -0.00134 | 0.00000  | 0.00848  | 0.00199  | 0.00000  |
| 197 | C9  | S   | -0.02778 | 0.00000  | 0.20376  | 0.15817  | 0.00000  |
| 198 | C9  | PX  | 0.05071  | 0.00000  | -0.18831 | -0.18337 | 0.00000  |
| 199 | C9  | PY  | 0.03998  | 0.00000  | -0.09415 | -0.09963 | 0.00000  |
| 200 | C9  | PZ  | 0.00000  | 0.01380  | 0.00000  | 0.00000  | -0.11625 |
| 201 | C9  | S   | -0.16944 | 0.00000  | 0.15926  | 0.20921  | 0.00000  |
| 202 | C9  | PX  | -0.01050 | 0.00000  | 0.12820  | 0.36969  | 0.00000  |
| 203 | C9  | PY  | -0.15471 | 0.00000  | 0.27924  | 0.17886  | 0.00000  |
| 204 | C9  | PZ  | 0.00000  | -0.04469 | 0.00000  | 0.00000  | 0.61065  |
| 205 | C9  | DXX | 0.06164  | 0.00000  | -0.12340 | -0.31077 | 0.00000  |
| 206 | C9  | DYY | -0.02682 | 0.00000  | -0.05852 | -0.02135 | 0.00000  |
| 207 | C9  | DZZ | -0.03265 | 0.00000  | 0.17717  | 0.28026  | 0.00000  |
| 208 | C9  | DXY | 0.09132  | 0.00000  | -0.28075 | -0.37895 | 0.00000  |
| 209 | C9  | DXZ | 0.00000  | -0.05582 | 0.00000  | 0.00000  | 0.51986  |
| 210 | C9  | DYZ | 0.00000  | 0.01657  | 0.00000  | 0.00000  | -0.29111 |
| 211 | H3  | S   | 0.08501  | 0.00000  | -0.07361 | -0.09880 | 0.00000  |
| 212 | H3  | S   | 0.07049  | 0.00000  | -0.11819 | -0.05713 | 0.00000  |
| 213 | H3  | PX  | 0.02271  | 0.00000  | -0.16083 | -0.05122 | 0.00000  |
| 214 | H3  | PY  | 0.03922  | 0.00000  | -0.03629 | -0.07011 | 0.00000  |
| 215 | H3  | PZ  | 0.00000  | 0.59478  | 0.00000  | 0.00000  | -0.22409 |
| 216 | H5  | S   | 0.03086  | -0.03442 | -0.11672 | -0.20813 | 0.46738  |
| 217 | H5  | S   | 0.01625  | -0.00744 | 0.02332  | 0.00008  | -0.02118 |
| 218 | H5  | PX  | 0.04155  | -0.21764 | -0.11720 | -0.22788 | -0.14042 |
| 219 | H5  | PY  | 0.04497  | 0.45744  | 0.01645  | -0.10570 | -0.06778 |
| 220 | H5  | PZ  | -0.00746 | -0.25048 | 0.02935  | 0.02715  | -0.39593 |
| 221 | H7  | S   | 0.03086  | 0.03442  | -0.11672 | -0.20813 | -0.46738 |
| 222 | H7  | S   | 0.01625  | 0.00744  | 0.02332  | 0.00008  | 0.02118  |
| 223 | H7  | PX  | 0.04155  | 0.21764  | -0.11720 | -0.22788 | 0.14042  |
| 224 | H7  | PY  | 0.04497  | -0.45744 | 0.01645  | -0.10570 | 0.06778  |
| 225 | H7  | PZ  | 0.00746  | -0.25048 | -0.02935 | -0.02715 | -0.39593 |

|              |         |         |         |         |         |
|--------------|---------|---------|---------|---------|---------|
| MO:          | 156     | 157     | 158     | 159     | 160     |
| Eigenvalues: | 2.38941 | 2.40058 | 2.43816 | 2.44064 | 2.45653 |

(ev): 65.01916 65.32302 66.34566 66.41335 66.84554

|    |    | A   | A        | A        | A        | A        |          |
|----|----|-----|----------|----------|----------|----------|----------|
| 1  | H1 | S   | 0.09481  | 0.00035  | 0.03272  | 0.00000  | -0.05830 |
| 2  | H1 | S   | -0.21783 | 0.21816  | 0.14406  | 0.00000  | 0.06162  |
| 3  | H1 | PX  | 0.03142  | -0.04213 | 0.02906  | 0.00000  | 0.01828  |
| 4  | H1 | PY  | 0.07018  | 0.17535  | 0.01756  | 0.00000  | -0.12263 |
| 5  | H1 | PZ  | 0.00000  | 0.00000  | 0.00000  | -0.12102 | 0.00000  |
| 6  | C1 | S   | 0.01703  | 0.00844  | -0.00909 | 0.00000  | 0.00637  |
| 7  | C1 | S   | 0.30134  | -0.04085 | -0.03642 | 0.00000  | 0.06574  |
| 8  | C1 | PX  | -0.12504 | -0.06456 | 0.00589  | 0.00000  | 0.03995  |
| 9  | C1 | PY  | 0.07102  | 0.24832  | -0.05105 | 0.00000  | -0.20223 |
| 10 | C1 | PZ  | 0.00000  | 0.00000  | 0.00000  | -0.01161 | 0.00000  |
| 11 | C1 | S   | -1.07822 | 0.18418  | 1.12917  | 0.00000  | -1.91109 |
| 12 | C1 | PX  | 0.78632  | -0.35856 | -0.52643 | 0.00000  | 0.42978  |
| 13 | C1 | PY  | -0.38170 | -0.04304 | 0.18597  | 0.00000  | 0.86380  |
| 14 | C1 | PZ  | 0.00000  | 0.00000  | 0.00000  | 0.02794  | 0.00000  |
| 15 | C1 | DXX | -0.12035 | -0.08534 | 0.01065  | 0.00000  | -0.00714 |
| 16 | C1 | DYY | 0.02037  | 0.03658  | -0.07054 | 0.00000  | 0.06577  |
| 17 | C1 | DZZ | 0.16973  | 0.09508  | 0.09385  | 0.00000  | -0.08838 |
| 18 | C1 | DXY | -0.05393 | 0.12860  | -0.06723 | 0.00000  | 0.05869  |
| 19 | C1 | DXZ | 0.00000  | 0.00000  | 0.00000  | 0.02139  | 0.00000  |
| 20 | C1 | DYZ | 0.00000  | 0.00000  | 0.00000  | 0.04625  | 0.00000  |
| 21 | C2 | S   | 0.01124  | -0.00003 | -0.01181 | 0.00000  | 0.00884  |
| 22 | C2 | S   | 0.25078  | -0.13698 | 0.07408  | 0.00000  | 0.18390  |
| 23 | C2 | PX  | 0.03707  | -0.11679 | 0.09122  | 0.00000  | 0.04939  |
| 24 | C2 | PY  | 0.26840  | 0.09188  | -0.00196 | 0.00000  | -0.04293 |
| 25 | C2 | PZ  | 0.00000  | 0.00000  | 0.00000  | 0.02795  | 0.00000  |
| 26 | C2 | S   | -0.51880 | -0.45052 | 0.92115  | 0.00000  | -0.63745 |
| 27 | C2 | PX  | -0.31468 | -0.09825 | 0.40083  | 0.00000  | -0.53552 |
| 28 | C2 | PY  | -0.20981 | -1.54381 | -0.14041 | 0.00000  | 0.78883  |
| 29 | C2 | PZ  | 0.00000  | 0.00000  | 0.00000  | -0.01259 | 0.00000  |
| 30 | C2 | DXX | 0.00972  | 0.04790  | 0.04982  | 0.00000  | -0.13510 |
| 31 | C2 | DYY | -0.04485 | 0.05928  | 0.00024  | 0.00000  | 0.06050  |
| 32 | C2 | DZZ | 0.13670  | -0.16247 | -0.01741 | 0.00000  | 0.09339  |
| 33 | C2 | DXY | -0.04392 | -0.13052 | -0.05580 | 0.00000  | 0.01988  |
| 34 | C2 | DXZ | 0.00000  | 0.00000  | 0.00000  | 0.04027  | 0.00000  |
| 35 | C2 | DYZ | 0.00000  | 0.00000  | 0.00000  | -0.00185 | 0.00000  |
| 36 | C3 | S   | 0.00469  | 0.01227  | -0.02384 | 0.00000  | 0.00589  |
| 37 | C3 | S   | -0.31355 | 0.06327  | -0.28354 | 0.00000  | 0.05112  |
| 38 | C3 | PX  | 0.15094  | -0.00962 | 0.15879  | 0.00000  | -0.09793 |
| 39 | C3 | PY  | 0.07245  | -0.06839 | 0.22257  | 0.00000  | -0.13512 |
| 40 | C3 | PZ  | 0.00000  | 0.00000  | 0.00000  | -0.00282 | 0.00000  |
| 41 | C3 | S   | 0.95837  | -2.99933 | -0.21182 | 0.00000  | 2.21198  |
| 42 | C3 | PX  | -0.94251 | 0.68442  | -0.60440 | 0.00000  | 0.66195  |
| 43 | C3 | PY  | -0.19998 | 1.84762  | -0.58018 | 0.00000  | 0.27333  |
| 44 | C3 | PZ  | 0.00000  | 0.00000  | 0.00000  | 0.01599  | 0.00000  |
| 45 | C3 | DXX | 0.08050  | -0.01149 | 0.30751  | 0.00000  | -0.16703 |
| 46 | C3 | DYY | -0.08331 | 0.11692  | -0.04917 | 0.00000  | -0.02044 |
| 47 | C3 | DZZ | 0.02568  | -0.17433 | -0.31782 | 0.00000  | 0.24972  |
| 48 | C3 | DXY | 0.12307  | 0.20306  | -0.02590 | 0.00000  | -0.08869 |
| 49 | C3 | DXZ | 0.00000  | 0.00000  | 0.00000  | 0.56676  | 0.00000  |
| 50 | C3 | DYZ | 0.00000  | 0.00000  | 0.00000  | -0.06921 | 0.00000  |
| 51 | C4 | S   | 0.01073  | 0.01651  | 0.00359  | 0.00000  | -0.00904 |



|     |    |     |          |          |          |          |          |
|-----|----|-----|----------|----------|----------|----------|----------|
| 52  | C4 | S   | 0.04282  | 0.38718  | 0.02154  | 0.00000  | -0.30255 |
| 53  | C4 | PX  | -0.03009 | -0.03557 | 0.02929  | 0.00000  | 0.06647  |
| 54  | C4 | PY  | 0.02638  | -0.19413 | -0.02905 | 0.00000  | 0.00897  |
| 55  | C4 | PZ  | 0.00000  | 0.00000  | 0.00000  | -0.01891 | 0.00000  |
| 56  | C4 | S   | 0.43702  | -0.48616 | -0.96809 | 0.00000  | -0.47297 |
| 57  | C4 | PX  | 0.73147  | -0.32308 | -0.25251 | 0.00000  | 1.05813  |
| 58  | C4 | PY  | -0.38874 | 1.31697  | 0.44540  | 0.00000  | -1.25858 |
| 59  | C4 | PZ  | 0.00000  | 0.00000  | 0.00000  | -0.04623 | 0.00000  |
| 60  | C4 | DXX | -0.15388 | -0.23940 | -0.05959 | 0.00000  | 0.10054  |
| 61  | C4 | DYY | 0.05285  | 0.02121  | 0.02958  | 0.00000  | -0.01132 |
| 62  | C4 | DZZ | 0.13869  | 0.27398  | -0.03968 | 0.00000  | -0.11344 |
| 63  | C4 | DXY | 0.11820  | 0.04142  | 0.04804  | 0.00000  | -0.00040 |
| 64  | C4 | DXZ | 0.00000  | 0.00000  | 0.00000  | 0.12491  | 0.00000  |
| 65  | C4 | DYZ | 0.00000  | 0.00000  | 0.00000  | -0.00526 | 0.00000  |
| 66  | C5 | S   | 0.00694  | -0.00139 | -0.00323 | 0.00000  | -0.01552 |
| 67  | C5 | S   | 0.03623  | 0.10513  | -0.03346 | 0.00000  | -0.26459 |
| 68  | C5 | PX  | 0.05433  | 0.15906  | 0.02858  | 0.00000  | -0.04707 |
| 69  | C5 | PY  | -0.02001 | 0.03416  | 0.02957  | 0.00000  | 0.05579  |
| 70  | C5 | PZ  | 0.00000  | 0.00000  | 0.00000  | 0.00971  | 0.00000  |
| 71  | C5 | S   | 0.51715  | 1.20447  | 0.02791  | 0.00000  | 0.63062  |
| 72  | C5 | PX  | 0.10495  | -0.51296 | 0.17583  | 0.00000  | 0.77376  |
| 73  | C5 | PY  | 0.54187  | -1.09203 | 0.05318  | 0.00000  | 0.52582  |
| 74  | C5 | PZ  | 0.00000  | 0.00000  | 0.00000  | 0.02322  | 0.00000  |
| 75  | C5 | DXX | 0.13572  | -0.13196 | 0.13649  | 0.00000  | 0.15350  |
| 76  | C5 | DYY | -0.20124 | 0.06554  | -0.12554 | 0.00000  | 0.01395  |
| 77  | C5 | DZZ | 0.09595  | 0.10259  | -0.00161 | 0.00000  | -0.19114 |
| 78  | C5 | DXY | -0.22809 | -0.10089 | -0.02768 | 0.00000  | 0.05689  |
| 79  | C5 | DXZ | 0.00000  | 0.00000  | 0.00000  | 0.11741  | 0.00000  |
| 80  | C5 | DYZ | 0.00000  | 0.00000  | 0.00000  | 0.08793  | 0.00000  |
| 81  | C6 | S   | 0.00840  | -0.00969 | -0.01959 | 0.00000  | 0.01848  |
| 82  | C6 | S   | 0.00439  | -0.44862 | -0.31780 | 0.00000  | 0.38608  |
| 83  | C6 | PX  | -0.05334 | -0.10559 | -0.16456 | 0.00000  | 0.18398  |
| 84  | C6 | PY  | -0.19628 | -0.05603 | 0.00448  | 0.00000  | 0.03894  |
| 85  | C6 | PZ  | 0.00000  | 0.00000  | 0.00000  | 0.04173  | 0.00000  |
| 86  | C6 | S   | -0.53147 | 0.66740  | 0.21243  | 0.00000  | 0.45605  |
| 87  | C6 | PX  | -0.71583 | 2.08146  | 0.70291  | 0.00000  | -1.13378 |
| 88  | C6 | PY  | 0.58411  | 0.82097  | -1.37951 | 0.00000  | 0.23708  |
| 89  | C6 | PZ  | 0.00000  | 0.00000  | 0.00000  | 0.05089  | 0.00000  |
| 90  | C6 | DXX | 0.24426  | 0.22016  | 0.05107  | 0.00000  | -0.11141 |
| 91  | C6 | DYY | -0.09473 | -0.15995 | 0.14784  | 0.00000  | -0.08733 |
| 92  | C6 | DZZ | -0.10972 | -0.05686 | -0.27577 | 0.00000  | 0.23852  |
| 93  | C6 | DXY | 0.11473  | -0.23159 | 0.21286  | 0.00000  | 0.02447  |
| 94  | C6 | DXZ | 0.00000  | 0.00000  | 0.00000  | 0.36576  | 0.00000  |
| 95  | C6 | DYZ | 0.00000  | 0.00000  | 0.00000  | 0.15473  | 0.00000  |
| 96  | C7 | S   | 0.00610  | -0.01717 | -0.00752 | 0.00000  | 0.01294  |
| 97  | C7 | S   | 0.41562  | -0.32048 | -0.02983 | 0.00000  | 0.15315  |
| 98  | C7 | PX  | -0.17164 | 0.02537  | -0.06510 | 0.00000  | 0.02703  |
| 99  | C7 | PY  | -0.04680 | 0.17244  | -0.18221 | 0.00000  | 0.01877  |
| 100 | C7 | PZ  | 0.00000  | 0.00000  | 0.00000  | -0.10895 | 0.00000  |
| 101 | C7 | S   | -0.79357 | 3.14890  | 0.26718  | 0.00000  | -1.70317 |
| 102 | C7 | PX  | 0.58509  | -1.86693 | -0.07945 | 0.00000  | 0.78899  |
| 103 | C7 | PY  | 0.44057  | -0.26775 | 0.86506  | 0.00000  | -0.53780 |
| 104 | C7 | PZ  | 0.00000  | 0.00000  | 0.00000  | -0.15760 | 0.00000  |
| 105 | C7 | DXX | -0.08828 | -0.07506 | 0.20864  | 0.00000  | -0.04379 |

|     |    |     |          |          |          |          |          |
|-----|----|-----|----------|----------|----------|----------|----------|
| 106 | C7 | DYY | 0.01291  | 0.15155  | -0.16805 | 0.00000  | -0.00171 |
| 107 | C7 | DZZ | 0.15141  | 0.04664  | -0.10574 | 0.00000  | 0.00087  |
| 108 | C7 | DXY | -0.06498 | 0.06728  | -0.14138 | 0.00000  | 0.06261  |
| 109 | C7 | DXZ | 0.00000  | 0.00000  | 0.00000  | 0.13396  | 0.00000  |
| 110 | C7 | DYZ | 0.00000  | 0.00000  | 0.00000  | -0.02608 | 0.00000  |
| 111 | O1 | S   | 0.01581  | 0.02044  | 0.00144  | 0.00000  | -0.02373 |
| 112 | O1 | S   | 0.00574  | 0.18244  | -0.05715 | 0.00000  | -0.23389 |
| 113 | O1 | PX  | -0.03249 | -0.02353 | -0.02228 | 0.00000  | 0.11374  |
| 114 | O1 | PY  | 0.02480  | 0.06506  | 0.06338  | 0.00000  | 0.06735  |
| 115 | O1 | PZ  | 0.00000  | 0.00000  | 0.00000  | 0.00051  | 0.00000  |
| 116 | O1 | S   | -0.20415 | -1.02254 | 0.05518  | 0.00000  | 1.27596  |
| 117 | O1 | PX  | -0.18928 | -0.10830 | 0.12079  | 0.00000  | -0.22246 |
| 118 | O1 | PY  | -0.09681 | -0.09129 | -0.15758 | 0.00000  | -0.56155 |
| 119 | O1 | PZ  | 0.00000  | 0.00000  | 0.00000  | 0.02209  | 0.00000  |
| 120 | O1 | DXX | -0.01223 | 0.05856  | -0.07727 | 0.00000  | -0.28883 |
| 121 | O1 | DYY | 0.00797  | 0.05614  | 0.04037  | 0.00000  | -0.04447 |
| 122 | O1 | DZZ | 0.05270  | -0.00226 | 0.02830  | 0.00000  | 0.20244  |
| 123 | O1 | DXY | 0.06629  | -0.09943 | 0.02935  | 0.00000  | 0.20730  |
| 124 | O1 | DXZ | 0.00000  | 0.00000  | 0.00000  | -0.04325 | 0.00000  |
| 125 | O1 | DYZ | 0.00000  | 0.00000  | 0.00000  | -0.02217 | 0.00000  |
| 126 | H4 | S   | -0.21082 | -0.03210 | -0.01475 | 0.00000  | -0.05076 |
| 127 | H4 | S   | -0.07995 | 0.07797  | 0.04902  | 0.00000  | 0.03320  |
| 128 | H4 | PX  | -0.02925 | 0.11790  | -0.04601 | 0.00000  | -0.00302 |
| 129 | H4 | PY  | -0.13310 | 0.10125  | -0.04838 | 0.00000  | -0.03049 |
| 130 | H4 | PZ  | 0.00000  | 0.00000  | 0.00000  | 0.00321  | 0.00000  |
| 131 | N1 | S   | -0.00232 | -0.00897 | -0.01581 | 0.00000  | 0.01611  |
| 132 | N1 | S   | -0.23318 | -0.12379 | 0.11485  | 0.00000  | 0.22752  |
| 133 | N1 | PX  | -0.13892 | -0.02734 | 0.26801  | 0.00000  | -0.05979 |
| 134 | N1 | PY  | 0.13043  | 0.14784  | -0.21365 | 0.00000  | 0.07461  |
| 135 | N1 | PZ  | 0.00000  | 0.00000  | 0.00000  | 0.01330  | 0.00000  |
| 136 | N1 | S   | 0.79491  | 1.03923  | 0.20705  | 0.00000  | -1.27918 |
| 137 | N1 | PX  | 0.55070  | -0.13288 | 0.20790  | 0.00000  | -0.28335 |
| 138 | N1 | PY  | -0.41101 | 0.55065  | -0.30540 | 0.00000  | -0.23582 |
| 139 | N1 | PZ  | 0.00000  | 0.00000  | 0.00000  | 0.17593  | 0.00000  |
| 140 | N1 | DXX | 0.10283  | 0.02177  | -0.12689 | 0.00000  | 0.03170  |
| 141 | N1 | DYY | -0.15531 | -0.02669 | 0.03618  | 0.00000  | 0.00752  |
| 142 | N1 | DZZ | 0.03192  | 0.05183  | 0.07001  | 0.00000  | -0.01532 |
| 143 | N1 | DXY | -0.02446 | -0.04618 | 0.05610  | 0.00000  | -0.02840 |
| 144 | N1 | DXZ | 0.00000  | 0.00000  | 0.00000  | 0.34232  | 0.00000  |
| 145 | N1 | DYZ | 0.00000  | 0.00000  | 0.00000  | -0.14855 | 0.00000  |
| 146 | H6 | S   | -0.01251 | -0.08009 | 0.00118  | 0.00000  | 0.08980  |
| 147 | H6 | S   | -0.08165 | -0.16292 | 0.06385  | 0.00000  | -0.09380 |
| 148 | H6 | PX  | -0.08275 | -0.00530 | -0.03979 | 0.00000  | -0.01544 |
| 149 | H6 | PY  | 0.13653  | 0.07387  | 0.05525  | 0.00000  | -0.12439 |
| 150 | H6 | PZ  | 0.00000  | 0.00000  | 0.00000  | 0.04384  | 0.00000  |
| 151 | C8 | S   | -0.00126 | 0.02281  | 0.01948  | 0.00000  | -0.02055 |
| 152 | C8 | S   | -0.09737 | 0.15477  | 0.43259  | 0.00000  | -0.28627 |
| 153 | C8 | PX  | 0.08071  | -0.01130 | -0.02367 | 0.00000  | -0.01833 |
| 154 | C8 | PY  | -0.03741 | 0.00402  | 0.03854  | 0.00000  | -0.00541 |
| 155 | C8 | PZ  | 0.00000  | 0.00000  | 0.00000  | -0.05773 | 0.00000  |
| 156 | C8 | S   | -0.06127 | -1.05960 | 0.37359  | 0.00000  | 0.22129  |
| 157 | C8 | PX  | 0.26035  | -0.53811 | 1.58983  | 0.00000  | -0.74809 |
| 158 | C8 | PY  | 0.65555  | -1.81187 | -2.19754 | 0.00000  | 2.36074  |
| 159 | C8 | PZ  | 0.00000  | 0.00000  | 0.00000  | -0.16848 | 0.00000  |

|     |     |     |          |          |          |          |          |
|-----|-----|-----|----------|----------|----------|----------|----------|
| 160 | C8  | DXX | 0.02110  | 0.17929  | -0.45050 | 0.00000  | 0.07653  |
| 161 | C8  | DYY | -0.08652 | -0.13563 | 0.20296  | 0.00000  | -0.02367 |
| 162 | C8  | DZZ | 0.05568  | 0.00483  | 0.36922  | 0.00000  | -0.15776 |
| 163 | C8  | DXY | -0.27009 | 0.11851  | 0.02839  | 0.00000  | -0.03837 |
| 164 | C8  | DXZ | 0.00000  | 0.00000  | 0.00000  | 0.51862  | 0.00000  |
| 165 | C8  | DYZ | 0.00000  | 0.00000  | 0.00000  | 0.32612  | 0.00000  |
| 166 | H8  | S   | 0.06562  | 0.16258  | -0.15635 | 0.00000  | 0.01796  |
| 167 | H8  | S   | -0.17200 | 0.36963  | 0.11113  | 0.00000  | -0.17993 |
| 168 | H8  | PX  | 0.05540  | 0.09461  | -0.12671 | 0.00000  | -0.00096 |
| 169 | H8  | PY  | 0.01905  | 0.00881  | -0.28404 | 0.00000  | 0.10418  |
| 170 | H8  | PZ  | 0.00000  | 0.00000  | 0.00000  | 0.25018  | 0.00000  |
| 171 | C10 | S   | -0.00483 | 0.02584  | 0.01184  | 0.00000  | -0.02460 |
| 172 | C10 | S   | -0.03402 | 0.20190  | -0.11931 | 0.00000  | -0.05710 |
| 173 | C10 | PX  | -0.16443 | 0.02134  | 0.06990  | 0.00000  | -0.02239 |
| 174 | C10 | PY  | -0.01160 | 0.04507  | -0.20682 | 0.00000  | 0.11929  |
| 175 | C10 | PZ  | 0.00000  | 0.00000  | 0.00000  | 0.06204  | 0.00000  |
| 176 | C10 | S   | 0.53622  | -1.37332 | -1.85123 | 0.00000  | 2.00166  |
| 177 | C10 | PX  | 0.59310  | 0.31222  | -0.34474 | 0.00000  | -0.10250 |
| 178 | C10 | PY  | 0.30379  | -0.35682 | -1.03828 | 0.00000  | 0.82085  |
| 179 | C10 | PZ  | 0.00000  | 0.00000  | 0.00000  | 0.17028  | 0.00000  |
| 180 | C10 | DXX | 0.06394  | -0.12778 | 0.16538  | 0.00000  | -0.03441 |
| 181 | C10 | DYY | -0.01754 | -0.10331 | -0.19816 | 0.00000  | 0.20142  |
| 182 | C10 | DZZ | -0.06429 | 0.39984  | -0.04878 | 0.00000  | -0.23548 |
| 183 | C10 | DXY | -0.13138 | 0.04575  | 0.02837  | 0.00000  | -0.02701 |
| 184 | C10 | DXZ | 0.00000  | 0.00000  | 0.00000  | 0.02513  | 0.00000  |
| 185 | C10 | DYZ | 0.00000  | 0.00000  | 0.00000  | 0.19542  | 0.00000  |
| 186 | H16 | S   | -0.19776 | 0.13421  | -0.00202 | 0.00000  | -0.05472 |
| 187 | H16 | S   | -0.26291 | -0.05349 | 0.19170  | 0.00000  | -0.03486 |
| 188 | H16 | PX  | -0.22292 | 0.11924  | 0.00011  | 0.00000  | -0.03497 |
| 189 | H16 | PY  | -0.39609 | 0.03015  | 0.27055  | 0.00000  | -0.07656 |
| 190 | H16 | PZ  | 0.00000  | 0.00000  | 0.00000  | -0.31455 | 0.00000  |
| 191 | H18 | S   | 0.13731  | 0.15252  | -0.07654 | 0.00000  | -0.07523 |
| 192 | H18 | S   | 0.25179  | 0.07221  | -0.24889 | 0.00000  | 0.03963  |
| 193 | H18 | PX  | -0.35134 | 0.06141  | 0.02510  | 0.00000  | 0.02869  |
| 194 | H18 | PY  | 0.30865  | -0.16142 | 0.06474  | 0.00000  | 0.00580  |
| 195 | H18 | PZ  | 0.00000  | 0.00000  | 0.00000  | -0.02630 | 0.00000  |
| 196 | C9  | S   | -0.00556 | -0.00686 | 0.00316  | 0.00000  | 0.01617  |
| 197 | C9  | S   | -0.03321 | 0.00423  | 0.05180  | 0.00000  | 0.27610  |
| 198 | C9  | PX  | -0.01877 | -0.04964 | 0.02198  | 0.00000  | 0.00677  |
| 199 | C9  | PY  | -0.01013 | -0.11695 | -0.09029 | 0.00000  | -0.23219 |
| 200 | C9  | PZ  | 0.00000  | 0.00000  | 0.00000  | 0.01334  | 0.00000  |
| 201 | C9  | S   | 0.24905  | 0.32951  | -0.11071 | 0.00000  | -0.38970 |
| 202 | C9  | PX  | -0.18020 | -0.32140 | -0.15099 | 0.00000  | -0.26864 |
| 203 | C9  | PY  | -0.07691 | 0.33238  | 0.39473  | 0.00000  | 0.91779  |
| 204 | C9  | PZ  | 0.00000  | 0.00000  | 0.00000  | -0.04535 | 0.00000  |
| 205 | C9  | DXX | 0.10333  | 0.02775  | -0.01844 | 0.00000  | -0.08176 |
| 206 | C9  | DYY | -0.00698 | 0.29677  | 0.20070  | 0.00000  | 0.31460  |
| 207 | C9  | DZZ | -0.08460 | -0.31725 | -0.18175 | 0.00000  | -0.25431 |
| 208 | C9  | DXY | 0.08435  | 0.03233  | -0.05016 | 0.00000  | -0.19068 |
| 209 | C9  | DXZ | 0.00000  | 0.00000  | 0.00000  | -0.00004 | 0.00000  |
| 210 | C9  | DYZ | 0.00000  | 0.00000  | 0.00000  | 0.01259  | 0.00000  |
| 211 | H3  | S   | -0.00202 | -0.30782 | -0.20525 | 0.00000  | -0.36237 |
| 212 | H3  | S   | -0.01799 | -0.07592 | -0.07585 | 0.00000  | -0.21861 |
| 213 | H3  | PX  | 0.08397  | 0.11738  | 0.16011  | 0.00000  | 0.36155  |

|     |    |    |          |          |          |          |          |
|-----|----|----|----------|----------|----------|----------|----------|
| 214 | H3 | PY | 0.01967  | -0.15475 | -0.10128 | 0.00000  | -0.18464 |
| 215 | H3 | PZ | 0.00000  | 0.00000  | 0.00000  | 0.02377  | 0.00000  |
| 216 | H5 | S  | 0.00834  | 0.17021  | 0.14048  | -0.00598 | 0.23379  |
| 217 | H5 | S  | 0.00232  | -0.05393 | 0.01218  | -0.02128 | 0.10750  |
| 218 | H5 | PX | 0.02971  | 0.09292  | 0.03829  | 0.03694  | 0.03172  |
| 219 | H5 | PY | -0.02290 | -0.10824 | -0.12001 | 0.02163  | -0.26928 |
| 220 | H5 | PZ | -0.00645 | -0.02264 | -0.01463 | 0.02715  | -0.01456 |
| 221 | H7 | S  | 0.00834  | 0.17021  | 0.14048  | 0.00598  | 0.23379  |
| 222 | H7 | S  | 0.00232  | -0.05393 | 0.01218  | 0.02128  | 0.10750  |
| 223 | H7 | PX | 0.02971  | 0.09292  | 0.03829  | -0.03694 | 0.03172  |
| 224 | H7 | PY | -0.02290 | -0.10824 | -0.12001 | -0.02163 | -0.26928 |
| 225 | H7 | PZ | 0.00645  | 0.02264  | 0.01463  | 0.02715  | 0.01456  |

|              |          |          |          |          |          |
|--------------|----------|----------|----------|----------|----------|
| MO:          | 161      | 162      | 163      | 164      | 165      |
| Eigenvalues: | 2.47655  | 2.52504  | 2.52866  | 2.55727  | 2.60320  |
| (ev):        | 67.39045 | 68.70988 | 68.80824 | 69.58695 | 70.83661 |

|    |    | A   | A        | A        | A        | A        |          |
|----|----|-----|----------|----------|----------|----------|----------|
| 1  | H1 | S   | -0.22887 | 0.00000  | -0.04773 | 0.00000  | 0.00000  |
| 2  | H1 | S   | 0.35499  | 0.00000  | -0.13486 | 0.00000  | 0.00000  |
| 3  | H1 | PX  | -0.04542 | 0.00000  | 0.06107  | 0.00000  | 0.00000  |
| 4  | H1 | PY  | -0.15085 | 0.00000  | -0.07586 | 0.00000  | 0.00000  |
| 5  | H1 | PZ  | 0.00000  | 0.20268  | 0.00000  | 0.08744  | 0.39747  |
| 6  | C1 | S   | -0.02280 | 0.00000  | -0.03047 | 0.00000  | 0.00000  |
| 7  | C1 | S   | -0.32963 | 0.00000  | -0.28429 | 0.00000  | 0.00000  |
| 8  | C1 | PX  | 0.16686  | 0.00000  | 0.11427  | 0.00000  | 0.00000  |
| 9  | C1 | PY  | -0.06254 | 0.00000  | -0.04012 | 0.00000  | 0.00000  |
| 10 | C1 | PZ  | 0.00000  | -0.10372 | 0.00000  | -0.01461 | -0.08272 |
| 11 | C1 | S   | 0.99711  | 0.00000  | 1.06038  | 0.00000  | 0.00000  |
| 12 | C1 | PX  | -1.08684 | 0.00000  | 0.17386  | 0.00000  | 0.00000  |
| 13 | C1 | PY  | 2.06581  | 0.00000  | -0.15947 | 0.00000  | 0.00000  |
| 14 | C1 | PZ  | 0.00000  | -0.11696 | 0.00000  | -0.05549 | -0.08933 |
| 15 | C1 | DXX | 0.33022  | 0.00000  | -0.06944 | 0.00000  | 0.00000  |
| 16 | C1 | DYY | -0.22764 | 0.00000  | 0.31237  | 0.00000  | 0.00000  |
| 17 | C1 | DZZ | -0.25733 | 0.00000  | -0.33667 | 0.00000  | 0.00000  |
| 18 | C1 | DXY | -0.18658 | 0.00000  | -0.08820 | 0.00000  | 0.00000  |
| 19 | C1 | DXZ | 0.00000  | 0.09135  | 0.00000  | 0.12032  | -0.17079 |
| 20 | C1 | DYZ | 0.00000  | -0.06880 | 0.00000  | -0.39383 | 0.17788  |
| 21 | C2 | S   | -0.00641 | 0.00000  | 0.03898  | 0.00000  | 0.00000  |
| 22 | C2 | S   | -0.21994 | 0.00000  | 0.22832  | 0.00000  | 0.00000  |
| 23 | C2 | PX  | -0.02158 | 0.00000  | -0.04471 | 0.00000  | 0.00000  |
| 24 | C2 | PY  | -0.07756 | 0.00000  | 0.20810  | 0.00000  | 0.00000  |
| 25 | C2 | PZ  | 0.00000  | 0.04920  | 0.00000  | -0.07694 | 0.02667  |
| 26 | C2 | S   | 0.96023  | 0.00000  | -0.62612 | 0.00000  | 0.00000  |
| 27 | C2 | PX  | 0.55078  | 0.00000  | -0.20068 | 0.00000  | 0.00000  |
| 28 | C2 | PY  | -0.74291 | 0.00000  | 0.98883  | 0.00000  | 0.00000  |
| 29 | C2 | PZ  | 0.00000  | 0.04217  | 0.00000  | -0.12235 | 0.08008  |
| 30 | C2 | DXX | 0.20630  | 0.00000  | -0.12578 | 0.00000  | 0.00000  |
| 31 | C2 | DYY | -0.21220 | 0.00000  | -0.25932 | 0.00000  | 0.00000  |
| 32 | C2 | DZZ | -0.04030 | 0.00000  | 0.46240  | 0.00000  | 0.00000  |
| 33 | C2 | DXY | -0.12501 | 0.00000  | 0.34527  | 0.00000  | 0.00000  |
| 34 | C2 | DXZ | 0.00000  | 0.12731  | 0.00000  | 0.11642  | -0.02792 |
| 35 | C2 | DYZ | 0.00000  | -0.18486 | 0.00000  | -0.42074 | 0.28290  |
| 36 | C3 | S   | -0.01287 | 0.00000  | -0.02466 | 0.00000  | 0.00000  |

|    |    |     |          |          |          |          |          |
|----|----|-----|----------|----------|----------|----------|----------|
| 37 | C3 | S   | 0.08110  | 0.00000  | -0.39194 | 0.00000  | 0.00000  |
| 38 | C3 | PX  | -0.06316 | 0.00000  | -0.03569 | 0.00000  | 0.00000  |
| 39 | C3 | PY  | 0.19895  | 0.00000  | -0.09690 | 0.00000  | 0.00000  |
| 40 | C3 | PZ  | 0.00000  | -0.04729 | 0.00000  | -0.10575 | -0.02621 |
| 41 | C3 | S   | 1.20097  | 0.00000  | 1.90953  | 0.00000  | 0.00000  |
| 42 | C3 | PX  | 1.54774  | 0.00000  | -1.68096 | 0.00000  | 0.00000  |
| 43 | C3 | PY  | 0.10095  | 0.00000  | -1.01049 | 0.00000  | 0.00000  |
| 44 | C3 | PZ  | 0.00000  | -0.13042 | 0.00000  | -0.02929 | -0.02509 |
| 45 | C3 | DXX | -0.05817 | 0.00000  | 0.04848  | 0.00000  | 0.00000  |
| 46 | C3 | DYY | 0.09784  | 0.00000  | 0.04994  | 0.00000  | 0.00000  |
| 47 | C3 | DZZ | 0.01505  | 0.00000  | -0.17585 | 0.00000  | 0.00000  |
| 48 | C3 | DXY | 0.13558  | 0.00000  | 0.02321  | 0.00000  | 0.00000  |
| 49 | C3 | DXZ | 0.00000  | 0.10660  | 0.00000  | -0.35610 | -0.06833 |
| 50 | C3 | DYZ | 0.00000  | 0.40444  | 0.00000  | -0.03035 | 0.39190  |
| 51 | C4 | S   | -0.02319 | 0.00000  | -0.02217 | 0.00000  | 0.00000  |
| 52 | C4 | S   | -0.29418 | 0.00000  | -0.04971 | 0.00000  | 0.00000  |
| 53 | C4 | PX  | -0.11435 | 0.00000  | -0.18047 | 0.00000  | 0.00000  |
| 54 | C4 | PY  | 0.09193  | 0.00000  | 0.04436  | 0.00000  | 0.00000  |
| 55 | C4 | PZ  | 0.00000  | 0.01628  | 0.00000  | 0.11641  | -0.11536 |
| 56 | C4 | S   | -0.86762 | 0.00000  | 0.37019  | 0.00000  | 0.00000  |
| 57 | C4 | PX  | -1.82595 | 0.00000  | -0.47532 | 0.00000  | 0.00000  |
| 58 | C4 | PY  | -0.44849 | 0.00000  | -0.52860 | 0.00000  | 0.00000  |
| 59 | C4 | PZ  | 0.00000  | 0.06574  | 0.00000  | 0.10584  | -0.05784 |
| 60 | C4 | DXX | -0.00620 | 0.00000  | 0.26047  | 0.00000  | 0.00000  |
| 61 | C4 | DYY | 0.13810  | 0.00000  | -0.09772 | 0.00000  | 0.00000  |
| 62 | C4 | DZZ | -0.22344 | 0.00000  | -0.17816 | 0.00000  | 0.00000  |
| 63 | C4 | DXY | -0.27319 | 0.00000  | -0.07456 | 0.00000  | 0.00000  |
| 64 | C4 | DXZ | 0.00000  | 0.41164  | 0.00000  | 0.19770  | -0.03632 |
| 65 | C4 | DYZ | 0.00000  | -0.02034 | 0.00000  | 0.05777  | -0.29592 |
| 66 | C5 | S   | 0.01022  | 0.00000  | 0.02716  | 0.00000  | 0.00000  |
| 67 | C5 | S   | 0.40102  | 0.00000  | 0.13521  | 0.00000  | 0.00000  |
| 68 | C5 | PX  | -0.01983 | 0.00000  | -0.13916 | 0.00000  | 0.00000  |
| 69 | C5 | PY  | -0.19532 | 0.00000  | -0.17951 | 0.00000  | 0.00000  |
| 70 | C5 | PZ  | 0.00000  | 0.06074  | 0.00000  | 0.08918  | -0.05872 |
| 71 | C5 | S   | -1.27394 | 0.00000  | -1.35455 | 0.00000  | 0.00000  |
| 72 | C5 | PX  | -0.94238 | 0.00000  | -0.15270 | 0.00000  | 0.00000  |
| 73 | C5 | PY  | -0.03241 | 0.00000  | 0.75812  | 0.00000  | 0.00000  |
| 74 | C5 | PZ  | 0.00000  | 0.03684  | 0.00000  | 0.13801  | -0.10935 |
| 75 | C5 | DXX | -0.14688 | 0.00000  | -0.19138 | 0.00000  | 0.00000  |
| 76 | C5 | DYY | 0.08047  | 0.00000  | -0.00632 | 0.00000  | 0.00000  |
| 77 | C5 | DZZ | 0.15108  | 0.00000  | 0.17889  | 0.00000  | 0.00000  |
| 78 | C5 | DXY | 0.12432  | 0.00000  | -0.28522 | 0.00000  | 0.00000  |
| 79 | C5 | DXZ | 0.00000  | 0.16251  | 0.00000  | -0.21251 | 0.18611  |
| 80 | C5 | DYZ | 0.00000  | 0.08886  | 0.00000  | -0.29550 | 0.15539  |
| 81 | C6 | S   | -0.00333 | 0.00000  | 0.00293  | 0.00000  | 0.00000  |
| 82 | C6 | S   | 0.02922  | 0.00000  | 0.20191  | 0.00000  | 0.00000  |
| 83 | C6 | PX  | 0.07060  | 0.00000  | -0.21441 | 0.00000  | 0.00000  |
| 84 | C6 | PY  | -0.07342 | 0.00000  | 0.29605  | 0.00000  | 0.00000  |
| 85 | C6 | PZ  | 0.00000  | -0.02927 | 0.00000  | -0.12667 | 0.01039  |
| 86 | C6 | S   | 0.08527  | 0.00000  | -1.00430 | 0.00000  | 0.00000  |
| 87 | C6 | PX  | 1.05718  | 0.00000  | -2.28000 | 0.00000  | 0.00000  |
| 88 | C6 | PY  | -0.21031 | 0.00000  | -0.23906 | 0.00000  | 0.00000  |
| 89 | C6 | PZ  | 0.00000  | -0.02914 | 0.00000  | -0.13601 | -0.00668 |
| 90 | C6 | DXX | -0.10854 | 0.00000  | 0.11096  | 0.00000  | 0.00000  |

|     |    |     |          |          |          |          |          |
|-----|----|-----|----------|----------|----------|----------|----------|
| 91  | C6 | DYY | 0.09815  | 0.00000  | -0.10595 | 0.00000  | 0.00000  |
| 92  | C6 | DZZ | -0.05656 | 0.00000  | 0.02571  | 0.00000  | 0.00000  |
| 93  | C6 | DXY | -0.06099 | 0.00000  | -0.10533 | 0.00000  | 0.00000  |
| 94  | C6 | DXZ | 0.00000  | 0.43547  | 0.00000  | 0.04373  | 0.03636  |
| 95  | C6 | DYZ | 0.00000  | 0.02910  | 0.00000  | 0.22791  | 0.13783  |
| 96  | C7 | S   | 0.00658  | 0.00000  | -0.00506 | 0.00000  | 0.00000  |
| 97  | C7 | S   | 0.20306  | 0.00000  | -0.03295 | 0.00000  | 0.00000  |
| 98  | C7 | PX  | -0.10863 | 0.00000  | 0.03251  | 0.00000  | 0.00000  |
| 99  | C7 | PY  | -0.01114 | 0.00000  | -0.02667 | 0.00000  | 0.00000  |
| 100 | C7 | PZ  | 0.00000  | 0.09233  | 0.00000  | -0.00566 | 0.05180  |
| 101 | C7 | S   | -1.32938 | 0.00000  | -0.28190 | 0.00000  | 0.00000  |
| 102 | C7 | PX  | 0.48940  | 0.00000  | 0.53680  | 0.00000  | 0.00000  |
| 103 | C7 | PY  | -0.56262 | 0.00000  | 0.48994  | 0.00000  | 0.00000  |
| 104 | C7 | PZ  | 0.00000  | 0.19321  | 0.00000  | -0.00315 | 0.07848  |
| 105 | C7 | DXX | 0.16516  | 0.00000  | -0.17988 | 0.00000  | 0.00000  |
| 106 | C7 | DYY | -0.13062 | 0.00000  | 0.20100  | 0.00000  | 0.00000  |
| 107 | C7 | DZZ | -0.04354 | 0.00000  | -0.02570 | 0.00000  | 0.00000  |
| 108 | C7 | DXY | 0.02151  | 0.00000  | -0.04346 | 0.00000  | 0.00000  |
| 109 | C7 | DXZ | 0.00000  | 0.04047  | 0.00000  | -0.03491 | 0.04313  |
| 110 | C7 | DYZ | 0.00000  | 0.18290  | 0.00000  | 0.45816  | 0.33908  |
| 111 | O1 | S   | -0.03313 | 0.00000  | -0.02528 | 0.00000  | 0.00000  |
| 112 | O1 | S   | -0.53600 | 0.00000  | -0.13079 | 0.00000  | 0.00000  |
| 113 | O1 | PX  | -0.02436 | 0.00000  | -0.01224 | 0.00000  | 0.00000  |
| 114 | O1 | PY  | 0.14068  | 0.00000  | -0.05959 | 0.00000  | 0.00000  |
| 115 | O1 | PZ  | 0.00000  | 0.02867  | 0.00000  | 0.04056  | -0.05212 |
| 116 | O1 | S   | 1.82151  | 0.00000  | 0.80921  | 0.00000  | 0.00000  |
| 117 | O1 | PX  | 0.76931  | 0.00000  | 0.49352  | 0.00000  | 0.00000  |
| 118 | O1 | PY  | -0.19577 | 0.00000  | 0.18051  | 0.00000  | 0.00000  |
| 119 | O1 | PZ  | 0.00000  | -0.04309 | 0.00000  | -0.14585 | 0.25349  |
| 120 | O1 | DXX | 0.00684  | 0.00000  | 0.05638  | 0.00000  | 0.00000  |
| 121 | O1 | DYY | -0.10844 | 0.00000  | -0.08542 | 0.00000  | 0.00000  |
| 122 | O1 | DZZ | -0.14361 | 0.00000  | -0.06108 | 0.00000  | 0.00000  |
| 123 | O1 | DXY | -0.15397 | 0.00000  | 0.02565  | 0.00000  | 0.00000  |
| 124 | O1 | DXZ | 0.00000  | -0.10827 | 0.00000  | -0.08706 | 0.11688  |
| 125 | O1 | DYZ | 0.00000  | 0.07793  | 0.00000  | 0.19753  | -0.33232 |
| 126 | H4 | S   | 0.08016  | 0.00000  | -0.13618 | 0.00000  | 0.00000  |
| 127 | H4 | S   | -0.16141 | 0.00000  | -0.06095 | 0.00000  | 0.00000  |
| 128 | H4 | PX  | -0.13418 | 0.00000  | -0.11102 | 0.00000  | 0.00000  |
| 129 | H4 | PY  | 0.01151  | 0.00000  | -0.26517 | 0.00000  | 0.00000  |
| 130 | H4 | PZ  | 0.00000  | -0.06770 | 0.00000  | -0.17834 | 0.21575  |
| 131 | N1 | S   | 0.00427  | 0.00000  | -0.01113 | 0.00000  | 0.00000  |
| 132 | N1 | S   | -0.04610 | 0.00000  | -0.08386 | 0.00000  | 0.00000  |
| 133 | N1 | PX  | -0.08174 | 0.00000  | -0.01939 | 0.00000  | 0.00000  |
| 134 | N1 | PY  | -0.00387 | 0.00000  | 0.13165  | 0.00000  | 0.00000  |
| 135 | N1 | PZ  | 0.00000  | -0.00254 | 0.00000  | 0.00770  | 0.01029  |
| 136 | N1 | S   | -0.19944 | 0.00000  | 0.50397  | 0.00000  | 0.00000  |
| 137 | N1 | PX  | -0.21413 | 0.00000  | 0.85290  | 0.00000  | 0.00000  |
| 138 | N1 | PY  | -0.07922 | 0.00000  | -0.29268 | 0.00000  | 0.00000  |
| 139 | N1 | PZ  | 0.00000  | 0.11460  | 0.00000  | 0.14221  | -0.02267 |
| 140 | N1 | DXX | -0.12618 | 0.00000  | 0.27637  | 0.00000  | 0.00000  |
| 141 | N1 | DYY | 0.03884  | 0.00000  | -0.00569 | 0.00000  | 0.00000  |
| 142 | N1 | DZZ | 0.02431  | 0.00000  | -0.21496 | 0.00000  | 0.00000  |
| 143 | N1 | DXY | -0.18239 | 0.00000  | 0.28071  | 0.00000  | 0.00000  |
| 144 | N1 | DXZ | 0.00000  | 0.11420  | 0.00000  | -0.04472 | -0.21065 |

|     |     |     |          |          |          |          |          |
|-----|-----|-----|----------|----------|----------|----------|----------|
| 145 | N1  | DYZ | 0.00000  | 0.09051  | 0.00000  | 0.37126  | 0.14771  |
| 146 | H6  | S   | -0.10261 | 0.00000  | 0.03911  | 0.00000  | 0.00000  |
| 147 | H6  | S   | 0.05667  | 0.00000  | 0.10814  | 0.00000  | 0.00000  |
| 148 | H6  | PX  | 0.01202  | 0.00000  | -0.02510 | 0.00000  | 0.00000  |
| 149 | H6  | PY  | 0.16976  | 0.00000  | 0.14562  | 0.00000  | 0.00000  |
| 150 | H6  | PZ  | 0.00000  | -0.01707 | 0.00000  | 0.22778  | -0.00391 |
| 151 | C8  | S   | 0.00588  | 0.00000  | -0.00009 | 0.00000  | 0.00000  |
| 152 | C8  | S   | 0.05876  | 0.00000  | -0.11477 | 0.00000  | 0.00000  |
| 153 | C8  | PX  | -0.03282 | 0.00000  | 0.15281  | 0.00000  | 0.00000  |
| 154 | C8  | PY  | -0.05345 | 0.00000  | -0.11493 | 0.00000  | 0.00000  |
| 155 | C8  | PZ  | 0.00000  | 0.02921  | 0.00000  | 0.03106  | 0.05251  |
| 156 | C8  | S   | 0.30157  | 0.00000  | 0.35812  | 0.00000  | 0.00000  |
| 157 | C8  | PX  | -0.08506 | 0.00000  | 0.59970  | 0.00000  | 0.00000  |
| 158 | C8  | PY  | 0.23865  | 0.00000  | -0.15360 | 0.00000  | 0.00000  |
| 159 | C8  | PZ  | 0.00000  | -0.00223 | 0.00000  | -0.01828 | -0.03460 |
| 160 | C8  | DXX | 0.12154  | 0.00000  | -0.04891 | 0.00000  | 0.00000  |
| 161 | C8  | DYY | -0.13134 | 0.00000  | 0.05296  | 0.00000  | 0.00000  |
| 162 | C8  | DZZ | 0.06544  | 0.00000  | 0.06281  | 0.00000  | 0.00000  |
| 163 | C8  | DXY | -0.11713 | 0.00000  | 0.08795  | 0.00000  | 0.00000  |
| 164 | C8  | DXZ | 0.00000  | 0.18143  | 0.00000  | 0.07784  | -0.10444 |
| 165 | C8  | DYZ | 0.00000  | -0.32286 | 0.00000  | 0.28137  | 0.30520  |
| 166 | H8  | S   | -0.12275 | 0.00000  | 0.04081  | 0.00000  | 0.00000  |
| 167 | H8  | S   | -0.01515 | 0.00000  | -0.23795 | 0.00000  | 0.00000  |
| 168 | H8  | PX  | -0.06466 | 0.00000  | 0.08123  | 0.00000  | 0.00000  |
| 169 | H8  | PY  | 0.05689  | 0.00000  | 0.00368  | 0.00000  | 0.00000  |
| 170 | H8  | PZ  | 0.00000  | -0.44615 | 0.00000  | 0.15159  | -0.17404 |
| 171 | C10 | S   | 0.01249  | 0.00000  | 0.01514  | 0.00000  | 0.00000  |
| 172 | C10 | S   | 0.12165  | 0.00000  | 0.07723  | 0.00000  | 0.00000  |
| 173 | C10 | PX  | -0.03926 | 0.00000  | -0.00499 | 0.00000  | 0.00000  |
| 174 | C10 | PY  | 0.05076  | 0.00000  | -0.05013 | 0.00000  | 0.00000  |
| 175 | C10 | PZ  | 0.00000  | -0.10159 | 0.00000  | 0.06440  | 0.10242  |
| 176 | C10 | S   | -0.12407 | 0.00000  | -0.55218 | 0.00000  | 0.00000  |
| 177 | C10 | PX  | 0.12518  | 0.00000  | -0.07906 | 0.00000  | 0.00000  |
| 178 | C10 | PY  | -0.13856 | 0.00000  | -0.28611 | 0.00000  | 0.00000  |
| 179 | C10 | PZ  | 0.00000  | -0.16313 | 0.00000  | 0.09814  | 0.14977  |
| 180 | C10 | DXX | -0.02820 | 0.00000  | 0.05733  | 0.00000  | 0.00000  |
| 181 | C10 | DYY | -0.07320 | 0.00000  | -0.17575 | 0.00000  | 0.00000  |
| 182 | C10 | DZZ | 0.15770  | 0.00000  | 0.15881  | 0.00000  | 0.00000  |
| 183 | C10 | DXY | 0.10034  | 0.00000  | -0.08802 | 0.00000  | 0.00000  |
| 184 | C10 | DXZ | 0.00000  | 0.03829  | 0.00000  | 0.02338  | 0.00453  |
| 185 | C10 | DYZ | 0.00000  | -0.10893 | 0.00000  | 0.05550  | -0.01943 |
| 186 | H16 | S   | 0.08362  | 0.00000  | -0.03273 | 0.00000  | 0.00000  |
| 187 | H16 | S   | -0.14356 | 0.00000  | 0.11290  | 0.00000  | 0.00000  |
| 188 | H16 | PX  | -0.02601 | 0.00000  | 0.03284  | 0.00000  | 0.00000  |
| 189 | H16 | PY  | -0.18871 | 0.00000  | 0.16849  | 0.00000  | 0.00000  |
| 190 | H16 | PZ  | 0.00000  | 0.24786  | 0.00000  | -0.22432 | -0.31538 |
| 191 | H18 | S   | -0.00697 | 0.00000  | 0.08941  | 0.00000  | 0.00000  |
| 192 | H18 | S   | 0.05973  | 0.00000  | -0.09598 | 0.00000  | 0.00000  |
| 193 | H18 | PX  | -0.14273 | 0.00000  | 0.02530  | 0.00000  | 0.00000  |
| 194 | H18 | PY  | 0.16272  | 0.00000  | -0.11685 | 0.00000  | 0.00000  |
| 195 | H18 | PZ  | 0.00000  | 0.31628  | 0.00000  | -0.13005 | -0.31650 |
| 196 | C9  | S   | 0.02489  | 0.00000  | 0.00610  | 0.00000  | 0.00000  |
| 197 | C9  | S   | 0.08755  | 0.00000  | -0.04681 | 0.00000  | 0.00000  |
| 198 | C9  | PX  | 0.17154  | 0.00000  | 0.15952  | 0.00000  | 0.00000  |

|     |    |     |          |          |          |          |          |
|-----|----|-----|----------|----------|----------|----------|----------|
| 199 | C9 | PY  | -0.01904 | 0.00000  | 0.04090  | 0.00000  | 0.00000  |
| 200 | C9 | PZ  | 0.00000  | 0.00972  | 0.00000  | -0.00857 | 0.01087  |
| 201 | C9 | S   | -0.93982 | 0.00000  | -0.46616 | 0.00000  | 0.00000  |
| 202 | C9 | PX  | 0.22460  | 0.00000  | 0.24329  | 0.00000  | 0.00000  |
| 203 | C9 | PY  | 0.57957  | 0.00000  | 0.08501  | 0.00000  | 0.00000  |
| 204 | C9 | PZ  | 0.00000  | -0.04116 | 0.00000  | 0.09678  | -0.23394 |
| 205 | C9 | DXX | -0.24458 | 0.00000  | -0.20052 | 0.00000  | 0.00000  |
| 206 | C9 | DYY | 0.29528  | 0.00000  | 0.11471  | 0.00000  | 0.00000  |
| 207 | C9 | DZZ | -0.04343 | 0.00000  | 0.04259  | 0.00000  | 0.00000  |
| 208 | C9 | DXY | -0.15204 | 0.00000  | -0.10600 | 0.00000  | 0.00000  |
| 209 | C9 | DXZ | 0.00000  | 0.03697  | 0.00000  | 0.00857  | 0.05574  |
| 210 | C9 | DYZ | 0.00000  | 0.01229  | 0.00000  | -0.02264 | 0.04609  |
| 211 | H3 | S   | -0.19344 | 0.00000  | -0.04263 | 0.00000  | 0.00000  |
| 212 | H3 | S   | 0.01556  | 0.00000  | 0.08985  | 0.00000  | 0.00000  |
| 213 | H3 | PX  | -0.19985 | 0.00000  | -0.07625 | 0.00000  | 0.00000  |
| 214 | H3 | PY  | -0.16480 | 0.00000  | -0.08351 | 0.00000  | 0.00000  |
| 215 | H3 | PZ  | 0.00000  | 0.03309  | 0.00000  | -0.05598 | 0.15545  |
| 216 | H5 | S   | 0.19872  | 0.00828  | 0.02556  | 0.03507  | -0.04690 |
| 217 | H5 | S   | 0.01156  | -0.03278 | 0.02097  | 0.01084  | -0.06438 |
| 218 | H5 | PX  | 0.05879  | 0.08230  | -0.01623 | 0.00290  | 0.07258  |
| 219 | H5 | PY  | 0.06176  | 0.04914  | -0.01132 | 0.01160  | 0.00930  |
| 220 | H5 | PZ  | -0.02333 | 0.02661  | -0.01770 | -0.03492 | 0.08202  |
| 221 | H7 | S   | 0.19872  | -0.00828 | 0.02556  | -0.03507 | 0.04690  |
| 222 | H7 | S   | 0.01156  | 0.03278  | 0.02097  | -0.01084 | 0.06438  |
| 223 | H7 | PX  | 0.05879  | -0.08230 | -0.01623 | -0.00290 | -0.07258 |
| 224 | H7 | PY  | 0.06176  | -0.04914 | -0.01132 | -0.01160 | -0.00930 |
| 225 | H7 | PZ  | 0.02333  | 0.02661  | 0.01770  | -0.03492 | 0.08202  |

|              |          |          |          |          |          |
|--------------|----------|----------|----------|----------|----------|
| MO:          | 166      | 167      | 168      | 169      | 170      |
| Eigenvalues: | 2.63875  | 2.64334  | 2.68250  | 2.68802  | 2.72102  |
| (ev):        | 71.80413 | 71.92893 | 72.99470 | 73.14466 | 74.04273 |

|    |    | A   | A        | A        | A        | A        |          |
|----|----|-----|----------|----------|----------|----------|----------|
| 1  | H1 | S   | -0.14924 | 0.00000  | 0.13262  | 0.00000  | 0.08486  |
| 2  | H1 | S   | 0.17018  | 0.00000  | -0.17897 | 0.00000  | -0.03949 |
| 3  | H1 | PX  | -0.22235 | 0.00000  | 0.07119  | 0.00000  | -0.05745 |
| 4  | H1 | PY  | 0.10714  | 0.00000  | 0.09716  | 0.00000  | 0.12680  |
| 5  | H1 | PZ  | 0.00000  | 0.30492  | 0.00000  | -0.20333 | 0.00000  |
| 6  | C1 | S   | -0.05104 | 0.00000  | 0.01956  | 0.00000  | 0.01887  |
| 7  | C1 | S   | -0.32063 | 0.00000  | -0.05381 | 0.00000  | 0.26443  |
| 8  | C1 | PX  | -0.07723 | 0.00000  | 0.20744  | 0.00000  | -0.03397 |
| 9  | C1 | PY  | -0.07012 | 0.00000  | -0.05720 | 0.00000  | -0.02389 |
| 10 | C1 | PZ  | 0.00000  | -0.02799 | 0.00000  | 0.06528  | 0.00000  |
| 11 | C1 | S   | 2.23251  | 0.00000  | -0.25222 | 0.00000  | -2.07409 |
| 12 | C1 | PX  | -0.41051 | 0.00000  | 0.21248  | 0.00000  | 0.32965  |
| 13 | C1 | PY  | -1.13182 | 0.00000  | -0.11854 | 0.00000  | 0.41615  |
| 14 | C1 | PZ  | 0.00000  | -0.07293 | 0.00000  | 0.09315  | 0.00000  |
| 15 | C1 | DXX | 0.11500  | 0.00000  | -0.18753 | 0.00000  | 0.03457  |
| 16 | C1 | DYY | 0.23038  | 0.00000  | -0.03232 | 0.00000  | -0.15114 |
| 17 | C1 | DZZ | -0.48682 | 0.00000  | 0.23781  | 0.00000  | 0.08642  |
| 18 | C1 | DXY | 0.19343  | 0.00000  | -0.04993 | 0.00000  | -0.16300 |
| 19 | C1 | DXZ | 0.00000  | -0.06832 | 0.00000  | -0.08473 | 0.00000  |
| 20 | C1 | DYZ | 0.00000  | -0.22905 | 0.00000  | 0.40437  | 0.00000  |
| 21 | C2 | S   | -0.02761 | 0.00000  | -0.00403 | 0.00000  | 0.01439  |



|    |    |     |          |          |          |          |          |
|----|----|-----|----------|----------|----------|----------|----------|
| 22 | C2 | S   | -0.47040 | 0.00000  | -0.04239 | 0.00000  | 0.20073  |
| 23 | C2 | PX  | -0.02065 | 0.00000  | -0.01392 | 0.00000  | -0.05085 |
| 24 | C2 | PY  | -0.12064 | 0.00000  | -0.04710 | 0.00000  | -0.00999 |
| 25 | C2 | PZ  | 0.00000  | -0.08702 | 0.00000  | -0.08332 | 0.00000  |
| 26 | C2 | S   | 2.87479  | 0.00000  | -0.18298 | 0.00000  | -0.28693 |
| 27 | C2 | PX  | 1.81558  | 0.00000  | 0.22120  | 0.00000  | -0.82916 |
| 28 | C2 | PY  | 0.09791  | 0.00000  | -1.06185 | 0.00000  | 0.20218  |
| 29 | C2 | PZ  | 0.00000  | -0.03660 | 0.00000  | -0.08153 | 0.00000  |
| 30 | C2 | DXX | 0.22666  | 0.00000  | 0.02224  | 0.00000  | -0.13828 |
| 31 | C2 | DYY | -0.12347 | 0.00000  | 0.02439  | 0.00000  | 0.05089  |
| 32 | C2 | DZZ | -0.06869 | 0.00000  | -0.05921 | 0.00000  | 0.16050  |
| 33 | C2 | DXY | -0.03014 | 0.00000  | -0.19854 | 0.00000  | -0.02590 |
| 34 | C2 | DXZ | 0.00000  | 0.11545  | 0.00000  | 0.11734  | 0.00000  |
| 35 | C2 | DYZ | 0.00000  | -0.16367 | 0.00000  | 0.25426  | 0.00000  |
| 36 | C3 | S   | 0.00604  | 0.00000  | 0.01822  | 0.00000  | 0.03949  |
| 37 | C3 | S   | -0.07608 | 0.00000  | -0.01198 | 0.00000  | 0.25846  |
| 38 | C3 | PX  | 0.15784  | 0.00000  | -0.06463 | 0.00000  | 0.03302  |
| 39 | C3 | PY  | -0.26264 | 0.00000  | 0.25896  | 0.00000  | 0.00405  |
| 40 | C3 | PZ  | 0.00000  | -0.01566 | 0.00000  | 0.04704  | 0.00000  |
| 41 | C3 | S   | 0.76007  | 0.00000  | -1.06009 | 0.00000  | -1.36385 |
| 42 | C3 | PX  | -0.40299 | 0.00000  | -0.95095 | 0.00000  | 0.63969  |
| 43 | C3 | PY  | -2.26361 | 0.00000  | 0.65178  | 0.00000  | 1.79494  |
| 44 | C3 | PZ  | 0.00000  | 0.11125  | 0.00000  | -0.04323 | 0.00000  |
| 45 | C3 | DXX | 0.10363  | 0.00000  | -0.17813 | 0.00000  | -0.17806 |
| 46 | C3 | DYY | -0.05430 | 0.00000  | -0.02132 | 0.00000  | -0.06800 |
| 47 | C3 | DZZ | -0.00619 | 0.00000  | 0.09975  | 0.00000  | 0.33377  |
| 48 | C3 | DXY | -0.04476 | 0.00000  | 0.08159  | 0.00000  | 0.06575  |
| 49 | C3 | DXZ | 0.00000  | -0.03936 | 0.00000  | -0.12205 | 0.00000  |
| 50 | C3 | DYZ | 0.00000  | -0.23928 | 0.00000  | 0.18733  | 0.00000  |
| 51 | C4 | S   | 0.00142  | 0.00000  | -0.01332 | 0.00000  | 0.02317  |
| 52 | C4 | S   | 0.03633  | 0.00000  | 0.12678  | 0.00000  | -0.04243 |
| 53 | C4 | PX  | 0.03573  | 0.00000  | 0.04412  | 0.00000  | 0.06990  |
| 54 | C4 | PY  | 0.18418  | 0.00000  | -0.11876 | 0.00000  | 0.17040  |
| 55 | C4 | PZ  | 0.00000  | -0.05000 | 0.00000  | -0.03134 | 0.00000  |
| 56 | C4 | S   | 0.64653  | 0.00000  | 0.42131  | 0.00000  | -0.47972 |
| 57 | C4 | PX  | -0.44929 | 0.00000  | 0.09368  | 0.00000  | 1.20172  |
| 58 | C4 | PY  | -0.02893 | 0.00000  | 0.28271  | 0.00000  | -0.23529 |
| 59 | C4 | PZ  | 0.00000  | -0.04868 | 0.00000  | -0.00704 | 0.00000  |
| 60 | C4 | DXX | 0.01234  | 0.00000  | 0.02515  | 0.00000  | -0.25754 |
| 61 | C4 | DYY | -0.08401 | 0.00000  | 0.10946  | 0.00000  | 0.11950  |
| 62 | C4 | DZZ | 0.11043  | 0.00000  | -0.16939 | 0.00000  | 0.14605  |
| 63 | C4 | DXY | -0.04195 | 0.00000  | -0.24880 | 0.00000  | -0.13697 |
| 64 | C4 | DXZ | 0.00000  | -0.12393 | 0.00000  | -0.35484 | 0.00000  |
| 65 | C4 | DYZ | 0.00000  | -0.53306 | 0.00000  | 0.24893  | 0.00000  |
| 66 | C5 | S   | -0.00460 | 0.00000  | -0.01163 | 0.00000  | -0.02598 |
| 67 | C5 | S   | 0.28918  | 0.00000  | -0.06498 | 0.00000  | -0.05358 |
| 68 | C5 | PX  | 0.04655  | 0.00000  | 0.03314  | 0.00000  | 0.15723  |
| 69 | C5 | PY  | -0.10567 | 0.00000  | -0.02859 | 0.00000  | -0.00918 |
| 70 | C5 | PZ  | 0.00000  | -0.01345 | 0.00000  | -0.08504 | 0.00000  |
| 71 | C5 | S   | -1.60770 | 0.00000  | 0.96497  | 0.00000  | 1.13819  |
| 72 | C5 | PX  | -0.82156 | 0.00000  | -0.25632 | 0.00000  | 0.88849  |
| 73 | C5 | PY  | 0.78574  | 0.00000  | -0.62294 | 0.00000  | 0.52199  |
| 74 | C5 | PZ  | 0.00000  | -0.03629 | 0.00000  | -0.02757 | 0.00000  |
| 75 | C5 | DXX | 0.05608  | 0.00000  | -0.06824 | 0.00000  | 0.28108  |

|     |    |     |          |          |          |          |          |
|-----|----|-----|----------|----------|----------|----------|----------|
| 76  | C5 | DYY | 0.00490  | 0.00000  | 0.16053  | 0.00000  | -0.09308 |
| 77  | C5 | DZZ | -0.14136 | 0.00000  | -0.06919 | 0.00000  | -0.21549 |
| 78  | C5 | DXY | 0.09306  | 0.00000  | -0.10830 | 0.00000  | 0.05134  |
| 79  | C5 | DXZ | 0.00000  | -0.12295 | 0.00000  | -0.00584 | 0.00000  |
| 80  | C5 | DYZ | 0.00000  | -0.33174 | 0.00000  | -0.08729 | 0.00000  |
| 81  | C6 | S   | -0.01313 | 0.00000  | 0.04470  | 0.00000  | -0.04961 |
| 82  | C6 | S   | 0.05998  | 0.00000  | 0.33639  | 0.00000  | -0.40267 |
| 83  | C6 | PX  | -0.11010 | 0.00000  | 0.14018  | 0.00000  | 0.02945  |
| 84  | C6 | PY  | -0.00566 | 0.00000  | -0.13534 | 0.00000  | 0.22317  |
| 85  | C6 | PZ  | 0.00000  | -0.02941 | 0.00000  | -0.07389 | 0.00000  |
| 86  | C6 | S   | -1.28132 | 0.00000  | -1.04821 | 0.00000  | 1.57637  |
| 87  | C6 | PX  | 0.76188  | 0.00000  | 0.27191  | 0.00000  | 0.69872  |
| 88  | C6 | PY  | -1.99094 | 0.00000  | -0.26928 | 0.00000  | 0.63275  |
| 89  | C6 | PZ  | 0.00000  | -0.08734 | 0.00000  | -0.07413 | 0.00000  |
| 90  | C6 | DXX | -0.02752 | 0.00000  | 0.10272  | 0.00000  | 0.05399  |
| 91  | C6 | DYY | 0.16585  | 0.00000  | -0.28534 | 0.00000  | 0.13785  |
| 92  | C6 | DZZ | -0.29431 | 0.00000  | 0.22338  | 0.00000  | -0.23484 |
| 93  | C6 | DXY | 0.12397  | 0.00000  | -0.02418 | 0.00000  | 0.07684  |
| 94  | C6 | DXZ | 0.00000  | -0.10512 | 0.00000  | -0.20947 | 0.00000  |
| 95  | C6 | DYZ | 0.00000  | 0.02227  | 0.00000  | 0.39000  | 0.00000  |
| 96  | C7 | S   | 0.07218  | 0.00000  | 0.00282  | 0.00000  | 0.04096  |
| 97  | C7 | S   | 0.57880  | 0.00000  | 0.05584  | 0.00000  | 0.17731  |
| 98  | C7 | PX  | 0.08099  | 0.00000  | 0.04343  | 0.00000  | -0.04673 |
| 99  | C7 | PY  | -0.08561 | 0.00000  | 0.23815  | 0.00000  | 0.27367  |
| 100 | C7 | PZ  | 0.00000  | -0.04156 | 0.00000  | 0.04052  | 0.00000  |
| 101 | C7 | S   | -3.42213 | 0.00000  | -0.40277 | 0.00000  | -0.15602 |
| 102 | C7 | PX  | 2.12006  | 0.00000  | 0.49660  | 0.00000  | -0.25673 |
| 103 | C7 | PY  | -0.06384 | 0.00000  | 1.67289  | 0.00000  | 0.76357  |
| 104 | C7 | PZ  | 0.00000  | -0.07668 | 0.00000  | 0.09778  | 0.00000  |
| 105 | C7 | DXX | -0.37362 | 0.00000  | -0.14035 | 0.00000  | 0.07530  |
| 106 | C7 | DYY | -0.13943 | 0.00000  | 0.16140  | 0.00000  | -0.32310 |
| 107 | C7 | DZZ | 0.63637  | 0.00000  | -0.03972 | 0.00000  | 0.33386  |
| 108 | C7 | DXY | 0.07297  | 0.00000  | -0.43325 | 0.00000  | -0.28744 |
| 109 | C7 | DXZ | 0.00000  | -0.04702 | 0.00000  | 0.11665  | 0.00000  |
| 110 | C7 | DYZ | 0.00000  | -0.10114 | 0.00000  | 0.18194  | 0.00000  |
| 111 | O1 | S   | 0.00396  | 0.00000  | -0.01348 | 0.00000  | 0.00579  |
| 112 | O1 | S   | 0.21801  | 0.00000  | -0.14725 | 0.00000  | 0.01844  |
| 113 | O1 | PX  | -0.05255 | 0.00000  | 0.01676  | 0.00000  | 0.00782  |
| 114 | O1 | PY  | -0.09748 | 0.00000  | 0.03256  | 0.00000  | 0.01979  |
| 115 | O1 | PZ  | 0.00000  | -0.06755 | 0.00000  | 0.01081  | 0.00000  |
| 116 | O1 | S   | -0.51523 | 0.00000  | 0.37501  | 0.00000  | 0.05813  |
| 117 | O1 | PX  | 0.12886  | 0.00000  | 0.25967  | 0.00000  | -0.11999 |
| 118 | O1 | PY  | 0.29666  | 0.00000  | 0.25591  | 0.00000  | 0.11032  |
| 119 | O1 | PZ  | 0.00000  | 0.34653  | 0.00000  | -0.13926 | 0.00000  |
| 120 | O1 | DXX | 0.05416  | 0.00000  | 0.04834  | 0.00000  | -0.09045 |
| 121 | O1 | DYY | -0.10359 | 0.00000  | -0.01593 | 0.00000  | -0.03865 |
| 122 | O1 | DZZ | 0.11162  | 0.00000  | -0.13310 | 0.00000  | 0.14483  |
| 123 | O1 | DXY | -0.06049 | 0.00000  | 0.09171  | 0.00000  | 0.06246  |
| 124 | O1 | DXZ | 0.00000  | 0.17925  | 0.00000  | -0.03752 | 0.00000  |
| 125 | O1 | DYZ | 0.00000  | -0.44969 | 0.00000  | 0.08086  | 0.00000  |
| 126 | H4 | S   | -0.06487 | 0.00000  | -0.09955 | 0.00000  | -0.06343 |
| 127 | H4 | S   | -0.29381 | 0.00000  | 0.11972  | 0.00000  | 0.01699  |
| 128 | H4 | PX  | 0.01704  | 0.00000  | 0.00199  | 0.00000  | -0.00181 |
| 129 | H4 | PY  | 0.01877  | 0.00000  | -0.04552 | 0.00000  | -0.07542 |

|     |     |     |          |          |          |          |          |
|-----|-----|-----|----------|----------|----------|----------|----------|
| 130 | H4  | PZ  | 0.00000  | 0.28218  | 0.00000  | 0.20202  | 0.00000  |
| 131 | N1  | S   | 0.00589  | 0.00000  | 0.01500  | 0.00000  | -0.03705 |
| 132 | N1  | S   | 0.13653  | 0.00000  | 0.42682  | 0.00000  | -0.73216 |
| 133 | N1  | PX  | 0.04752  | 0.00000  | 0.00079  | 0.00000  | -0.04921 |
| 134 | N1  | PY  | -0.19050 | 0.00000  | 0.19563  | 0.00000  | -0.10502 |
| 135 | N1  | PZ  | 0.00000  | -0.00703 | 0.00000  | 0.00311  | 0.00000  |
| 136 | N1  | S   | -1.05454 | 0.00000  | -0.86186 | 0.00000  | 2.10120  |
| 137 | N1  | PX  | -0.24644 | 0.00000  | -0.39964 | 0.00000  | 0.61177  |
| 138 | N1  | PY  | -0.41703 | 0.00000  | -0.55387 | 0.00000  | 0.31358  |
| 139 | N1  | PZ  | 0.00000  | 0.11633  | 0.00000  | 0.24790  | 0.00000  |
| 140 | N1  | DXX | -0.13591 | 0.00000  | -0.16483 | 0.00000  | 0.20405  |
| 141 | N1  | DYY | 0.01071  | 0.00000  | -0.04649 | 0.00000  | 0.18596  |
| 142 | N1  | DZZ | 0.07763  | 0.00000  | 0.28965  | 0.00000  | -0.47124 |
| 143 | N1  | DXY | -0.10138 | 0.00000  | -0.20238 | 0.00000  | -0.04406 |
| 144 | N1  | DXZ | 0.00000  | 0.25405  | 0.00000  | 0.32234  | 0.00000  |
| 145 | N1  | DYZ | 0.00000  | -0.00142 | 0.00000  | 0.31278  | 0.00000  |
| 146 | H6  | S   | -0.00405 | 0.00000  | 0.02674  | 0.00000  | -0.02424 |
| 147 | H6  | S   | 0.49142  | 0.00000  | -0.09020 | 0.00000  | -0.27315 |
| 148 | H6  | PX  | 0.04529  | 0.00000  | -0.11073 | 0.00000  | -0.09522 |
| 149 | H6  | PY  | 0.03635  | 0.00000  | 0.25240  | 0.00000  | -0.23252 |
| 150 | H6  | PZ  | 0.00000  | 0.23316  | 0.00000  | 0.42850  | 0.00000  |
| 151 | C8  | S   | 0.00858  | 0.00000  | -0.02703 | 0.00000  | -0.03281 |
| 152 | C8  | S   | 0.12079  | 0.00000  | -0.15774 | 0.00000  | -0.20266 |
| 153 | C8  | PX  | -0.04929 | 0.00000  | -0.01855 | 0.00000  | 0.33230  |
| 154 | C8  | PY  | 0.40261  | 0.00000  | 0.33305  | 0.00000  | -0.09032 |
| 155 | C8  | PZ  | 0.00000  | -0.05137 | 0.00000  | -0.02677 | 0.00000  |
| 156 | C8  | S   | 0.39122  | 0.00000  | 0.25739  | 0.00000  | 0.74548  |
| 157 | C8  | PX  | 0.81962  | 0.00000  | 0.56298  | 0.00000  | 1.30470  |
| 158 | C8  | PY  | 0.81077  | 0.00000  | 2.45866  | 0.00000  | -0.09003 |
| 159 | C8  | PZ  | 0.00000  | -0.00452 | 0.00000  | -0.09585 | 0.00000  |
| 160 | C8  | DXX | -0.12315 | 0.00000  | 0.12931  | 0.00000  | 0.13222  |
| 161 | C8  | DYY | -0.05151 | 0.00000  | -0.07099 | 0.00000  | 0.16934  |
| 162 | C8  | DZZ | 0.13088  | 0.00000  | -0.15431 | 0.00000  | -0.27216 |
| 163 | C8  | DXY | 0.07945  | 0.00000  | 0.19001  | 0.00000  | 0.17152  |
| 164 | C8  | DXZ | 0.00000  | 0.18136  | 0.00000  | 0.22077  | 0.00000  |
| 165 | C8  | DYZ | 0.00000  | -0.14356 | 0.00000  | -0.00165 | 0.00000  |
| 166 | H8  | S   | 0.14771  | 0.00000  | 0.03308  | 0.00000  | 0.03559  |
| 167 | H8  | S   | -0.71610 | 0.00000  | -0.14237 | 0.00000  | 0.15455  |
| 168 | H8  | PX  | 0.20623  | 0.00000  | -0.01919 | 0.00000  | -0.04950 |
| 169 | H8  | PY  | 0.03466  | 0.00000  | -0.37573 | 0.00000  | -0.12159 |
| 170 | H8  | PZ  | 0.00000  | 0.17238  | 0.00000  | -0.25378 | 0.00000  |
| 171 | C10 | S   | -0.02802 | 0.00000  | -0.04380 | 0.00000  | 0.01857  |
| 172 | C10 | S   | -0.11720 | 0.00000  | -0.15524 | 0.00000  | 0.05194  |
| 173 | C10 | PX  | -0.03146 | 0.00000  | -0.08944 | 0.00000  | -0.05822 |
| 174 | C10 | PY  | 0.11568  | 0.00000  | 0.16529  | 0.00000  | -0.15787 |
| 175 | C10 | PZ  | 0.00000  | -0.06960 | 0.00000  | -0.02820 | 0.00000  |
| 176 | C10 | S   | 0.80880  | 0.00000  | 2.20445  | 0.00000  | -0.75442 |
| 177 | C10 | PX  | -0.59340 | 0.00000  | -0.54738 | 0.00000  | -0.50763 |
| 178 | C10 | PY  | 0.39465  | 0.00000  | 1.12096  | 0.00000  | -0.39679 |
| 179 | C10 | PZ  | 0.00000  | -0.09301 | 0.00000  | -0.02490 | 0.00000  |
| 180 | C10 | DXX | 0.00529  | 0.00000  | 0.04142  | 0.00000  | 0.12211  |
| 181 | C10 | DYY | 0.27170  | 0.00000  | 0.29455  | 0.00000  | -0.25661 |
| 182 | C10 | DZZ | -0.34811 | 0.00000  | -0.40138 | 0.00000  | 0.21332  |
| 183 | C10 | DXY | -0.16105 | 0.00000  | -0.24052 | 0.00000  | -0.14825 |

|     |     |     |          |          |          |          |          |
|-----|-----|-----|----------|----------|----------|----------|----------|
| 184 | C10 | DXZ | 0.00000  | 0.02258  | 0.00000  | 0.07614  | 0.00000  |
| 185 | C10 | DYZ | 0.00000  | 0.09388  | 0.00000  | 0.12312  | 0.00000  |
| 186 | H16 | S   | -0.03304 | 0.00000  | -0.16636 | 0.00000  | 0.01308  |
| 187 | H16 | S   | 0.25606  | 0.00000  | 0.33085  | 0.00000  | 0.31130  |
| 188 | H16 | PX  | -0.09317 | 0.00000  | -0.08921 | 0.00000  | -0.00020 |
| 189 | H16 | PY  | -0.01373 | 0.00000  | 0.01663  | 0.00000  | 0.14474  |
| 190 | H16 | PZ  | 0.00000  | 0.19526  | 0.00000  | 0.02656  | 0.00000  |
| 191 | H18 | S   | -0.08098 | 0.00000  | -0.05353 | 0.00000  | 0.03902  |
| 192 | H18 | S   | -0.15393 | 0.00000  | -0.06006 | 0.00000  | -0.25063 |
| 193 | H18 | PX  | 0.10042  | 0.00000  | 0.13297  | 0.00000  | -0.04485 |
| 194 | H18 | PY  | -0.08774 | 0.00000  | -0.19724 | 0.00000  | -0.20917 |
| 195 | H18 | PZ  | 0.00000  | 0.29512  | 0.00000  | 0.25053  | 0.00000  |
| 196 | C9  | S   | -0.01290 | 0.00000  | 0.01252  | 0.00000  | 0.00826  |
| 197 | C9  | S   | -0.10022 | 0.00000  | -0.02069 | 0.00000  | 0.10009  |
| 198 | C9  | PX  | 0.00534  | 0.00000  | 0.13067  | 0.00000  | -0.00014 |
| 199 | C9  | PY  | -0.01116 | 0.00000  | 0.06253  | 0.00000  | -0.06443 |
| 200 | C9  | PZ  | 0.00000  | 0.01156  | 0.00000  | 0.00540  | 0.00000  |
| 201 | C9  | S   | 0.22477  | 0.00000  | -0.46360 | 0.00000  | -0.20327 |
| 202 | C9  | PX  | 0.02014  | 0.00000  | 0.32143  | 0.00000  | 0.06986  |
| 203 | C9  | PY  | -0.23749 | 0.00000  | -0.04788 | 0.00000  | 0.01571  |
| 204 | C9  | PZ  | 0.00000  | -0.31913 | 0.00000  | 0.20859  | 0.00000  |
| 205 | C9  | DXX | -0.06720 | 0.00000  | -0.16421 | 0.00000  | -0.07310 |
| 206 | C9  | DYY | 0.06906  | 0.00000  | 0.12307  | 0.00000  | 0.15025  |
| 207 | C9  | DZZ | -0.00813 | 0.00000  | 0.01978  | 0.00000  | -0.06202 |
| 208 | C9  | DXY | 0.07929  | 0.00000  | -0.03301 | 0.00000  | 0.06600  |
| 209 | C9  | DXZ | 0.00000  | 0.10823  | 0.00000  | -0.13639 | 0.00000  |
| 210 | C9  | DYZ | 0.00000  | 0.04881  | 0.00000  | -0.03752 | 0.00000  |
| 211 | H3  | S   | -0.01024 | 0.00000  | 0.00237  | 0.00000  | -0.03275 |
| 212 | H3  | S   | 0.10631  | 0.00000  | 0.15298  | 0.00000  | 0.07882  |
| 213 | H3  | PX  | -0.04606 | 0.00000  | -0.19498 | 0.00000  | -0.14386 |
| 214 | H3  | PY  | -0.05582 | 0.00000  | -0.06695 | 0.00000  | -0.07490 |
| 215 | H3  | PZ  | 0.00000  | 0.20456  | 0.00000  | -0.12716 | 0.00000  |
| 216 | H5  | S   | -0.01327 | -0.03353 | 0.00953  | -0.01144 | 0.04356  |
| 217 | H5  | S   | -0.06640 | -0.11710 | -0.01830 | 0.11902  | -0.03369 |
| 218 | H5  | PX  | 0.04654  | 0.09335  | -0.04326 | -0.12657 | 0.03215  |
| 219 | H5  | PY  | 0.01741  | -0.00093 | 0.07069  | -0.03100 | 0.12317  |
| 220 | H5  | PZ  | -0.00678 | 0.09797  | -0.04663 | -0.05415 | -0.05403 |
| 221 | H7  | S   | -0.01327 | 0.03353  | 0.00953  | 0.01144  | 0.04356  |
| 222 | H7  | S   | -0.06640 | 0.11710  | -0.01830 | -0.11902 | -0.03369 |
| 223 | H7  | PX  | 0.04654  | -0.09335 | -0.04326 | 0.12657  | 0.03215  |
| 224 | H7  | PY  | 0.01741  | 0.00093  | 0.07069  | 0.03100  | 0.12317  |
| 225 | H7  | PZ  | 0.00678  | 0.09797  | 0.04663  | -0.05415 | 0.05403  |

|              |          |          |          |          |          |
|--------------|----------|----------|----------|----------|----------|
| MO:          | 171      | 172      | 173      | 174      | 175      |
| Eigenvalues: | 2.72457  | 2.73628  | 2.76280  | 2.80715  | 2.83712  |
| (ev):        | 74.13948 | 74.45804 | 75.17970 | 76.38635 | 77.20205 |

|   |    |    |         |          |          |          |          |
|---|----|----|---------|----------|----------|----------|----------|
|   |    | A  | A       | A        | A        | A        |          |
| 1 | H1 | S  | 0.00000 | -0.03202 | 0.02954  | 0.00000  | -0.06280 |
| 2 | H1 | S  | 0.00000 | 0.00156  | -0.50945 | 0.00000  | 0.20956  |
| 3 | H1 | PX | 0.00000 | 0.04783  | 0.18170  | 0.00000  | 0.10954  |
| 4 | H1 | PY | 0.00000 | -0.15424 | 0.08144  | 0.00000  | -0.48909 |
| 5 | H1 | PZ | 0.24424 | 0.00000  | 0.00000  | -0.18170 | 0.00000  |
| 6 | C1 | S  | 0.00000 | -0.02350 | -0.00929 | 0.00000  | -0.01151 |

|    |    |     |          |          |          |          |          |
|----|----|-----|----------|----------|----------|----------|----------|
| 7  | C1 | S   | 0.00000  | 0.05420  | 0.18563  | 0.00000  | -0.00423 |
| 8  | C1 | PX  | 0.00000  | -0.14773 | -0.00240 | 0.00000  | -0.19002 |
| 9  | C1 | PY  | 0.00000  | 0.13470  | 0.08873  | 0.00000  | 0.30004  |
| 10 | C1 | PZ  | 0.00212  | 0.00000  | 0.00000  | 0.03895  | 0.00000  |
| 11 | C1 | S   | 0.00000  | 0.64513  | 0.55446  | 0.00000  | 0.85161  |
| 12 | C1 | PX  | 0.00000  | -0.34011 | 0.71822  | 0.00000  | -1.32114 |
| 13 | C1 | PY  | 0.00000  | 0.53171  | 0.28769  | 0.00000  | 2.79786  |
| 14 | C1 | PZ  | -0.02864 | 0.00000  | 0.00000  | 0.05610  | 0.00000  |
| 15 | C1 | DXX | 0.00000  | 0.10425  | -0.14461 | 0.00000  | 0.33545  |
| 16 | C1 | DYY | 0.00000  | 0.09540  | 0.25361  | 0.00000  | -0.15321 |
| 17 | C1 | DZZ | 0.00000  | -0.24859 | -0.05703 | 0.00000  | -0.16911 |
| 18 | C1 | DXY | 0.00000  | -0.25706 | -0.26850 | 0.00000  | -0.39002 |
| 19 | C1 | DXZ | -0.21870 | 0.00000  | 0.00000  | 0.10843  | 0.00000  |
| 20 | C1 | DYZ | 0.10417  | 0.00000  | 0.00000  | 0.00306  | 0.00000  |
| 21 | C2 | S   | 0.00000  | 0.02475  | 0.04131  | 0.00000  | -0.01124 |
| 22 | C2 | S   | 0.00000  | 0.10944  | 0.07456  | 0.00000  | -0.04604 |
| 23 | C2 | PX  | 0.00000  | -0.10023 | -0.07243 | 0.00000  | 0.07203  |
| 24 | C2 | PY  | 0.00000  | -0.17426 | -0.08908 | 0.00000  | 0.26546  |
| 25 | C2 | PZ  | 0.03235  | 0.00000  | 0.00000  | -0.03412 | 0.00000  |
| 26 | C2 | S   | 0.00000  | -1.20562 | -1.54977 | 0.00000  | 0.70880  |
| 27 | C2 | PX  | 0.00000  | 0.23264  | 0.34094  | 0.00000  | 0.14700  |
| 28 | C2 | PY  | 0.00000  | -0.91993 | -0.41933 | 0.00000  | 1.11788  |
| 29 | C2 | PZ  | 0.06577  | 0.00000  | 0.00000  | -0.04511 | 0.00000  |
| 30 | C2 | DXX | 0.00000  | -0.07528 | -0.03956 | 0.00000  | 0.07450  |
| 31 | C2 | DYY | 0.00000  | -0.05156 | -0.24349 | 0.00000  | 0.09753  |
| 32 | C2 | DZZ | 0.00000  | 0.25390  | 0.36729  | 0.00000  | -0.15119 |
| 33 | C2 | DXY | 0.00000  | -0.29742 | -0.11310 | 0.00000  | 0.13241  |
| 34 | C2 | DXZ | -0.33076 | 0.00000  | 0.00000  | 0.06561  | 0.00000  |
| 35 | C2 | DYZ | -0.07171 | 0.00000  | 0.00000  | -0.30907 | 0.00000  |
| 36 | C3 | S   | 0.00000  | -0.02727 | -0.01412 | 0.00000  | -0.02697 |
| 37 | C3 | S   | 0.00000  | -0.13934 | -0.11295 | 0.00000  | -0.21103 |
| 38 | C3 | PX  | 0.00000  | -0.04052 | -0.14851 | 0.00000  | -0.06715 |
| 39 | C3 | PY  | 0.00000  | -0.10936 | 0.05140  | 0.00000  | 0.16808  |
| 40 | C3 | PZ  | -0.01167 | 0.00000  | 0.00000  | 0.05351  | 0.00000  |
| 41 | C3 | S   | 0.00000  | -0.08358 | 1.90074  | 0.00000  | 1.85916  |
| 42 | C3 | PX  | 0.00000  | -0.74275 | -0.88551 | 0.00000  | 0.62386  |
| 43 | C3 | PY  | 0.00000  | 1.32344  | -1.38554 | 0.00000  | 1.75498  |
| 44 | C3 | PZ  | 0.05074  | 0.00000  | 0.00000  | -0.05292 | 0.00000  |
| 45 | C3 | DXX | 0.00000  | 0.15657  | 0.09400  | 0.00000  | -0.13141 |
| 46 | C3 | DYY | 0.00000  | 0.00171  | -0.04847 | 0.00000  | 0.23210  |
| 47 | C3 | DZZ | 0.00000  | -0.20623 | -0.03054 | 0.00000  | -0.14773 |
| 48 | C3 | DXY | 0.00000  | -0.11912 | 0.18635  | 0.00000  | 0.15537  |
| 49 | C3 | DXZ | -0.20842 | 0.00000  | 0.00000  | -0.05943 | 0.00000  |
| 50 | C3 | DYZ | 0.07498  | 0.00000  | 0.00000  | -0.13482 | 0.00000  |
| 51 | C4 | S   | 0.00000  | 0.03290  | -0.06013 | 0.00000  | 0.03631  |
| 52 | C4 | S   | 0.00000  | 0.33217  | -0.60384 | 0.00000  | 0.08527  |
| 53 | C4 | PX  | 0.00000  | -0.08737 | -0.22642 | 0.00000  | -0.21497 |
| 54 | C4 | PY  | 0.00000  | 0.38036  | -0.03241 | 0.00000  | 0.23324  |
| 55 | C4 | PZ  | -0.03100 | 0.00000  | 0.00000  | 0.01577  | 0.00000  |
| 56 | C4 | S   | 0.00000  | -0.65901 | 2.92770  | 0.00000  | -2.49233 |
| 57 | C4 | PX  | 0.00000  | -0.50097 | -2.04873 | 0.00000  | -2.09860 |
| 58 | C4 | PY  | 0.00000  | 1.45941  | -1.31032 | 0.00000  | 0.92642  |
| 59 | C4 | PZ  | -0.01860 | 0.00000  | 0.00000  | -0.01428 | 0.00000  |
| 60 | C4 | DXX | 0.00000  | -0.20028 | 0.02468  | 0.00000  | -0.19133 |

|     |    |     |          |          |          |          |          |
|-----|----|-----|----------|----------|----------|----------|----------|
| 61  | C4 | DYY | 0.00000  | -0.06990 | 0.21427  | 0.00000  | -0.12260 |
| 62  | C4 | DZZ | 0.00000  | 0.24094  | -0.31603 | 0.00000  | 0.24312  |
| 63  | C4 | DXY | 0.00000  | 0.03252  | 0.30431  | 0.00000  | 0.30642  |
| 64  | C4 | DXZ | -0.25491 | 0.00000  | 0.00000  | -0.11961 | 0.00000  |
| 65  | C4 | DYZ | -0.03726 | 0.00000  | 0.00000  | -0.07193 | 0.00000  |
| 66  | C5 | S   | 0.00000  | -0.04030 | 0.04521  | 0.00000  | 0.03638  |
| 67  | C5 | S   | 0.00000  | -0.21084 | 0.44754  | 0.00000  | 0.05789  |
| 68  | C5 | PX  | 0.00000  | 0.18071  | -0.12854 | 0.00000  | 0.01961  |
| 69  | C5 | PY  | 0.00000  | -0.17213 | -0.21789 | 0.00000  | 0.14492  |
| 70  | C5 | PZ  | 0.04837  | 0.00000  | 0.00000  | 0.01247  | 0.00000  |
| 71  | C5 | S   | 0.00000  | 1.66548  | -2.15379 | 0.00000  | -2.10645 |
| 72  | C5 | PX  | 0.00000  | -0.19692 | -2.37672 | 0.00000  | 0.03375  |
| 73  | C5 | PY  | 0.00000  | -1.35065 | -0.87733 | 0.00000  | 0.28860  |
| 74  | C5 | PZ  | 0.04675  | 0.00000  | 0.00000  | 0.01067  | 0.00000  |
| 75  | C5 | DXX | 0.00000  | 0.20904  | -0.33938 | 0.00000  | 0.12127  |
| 76  | C5 | DYY | 0.00000  | 0.10368  | 0.16261  | 0.00000  | -0.34335 |
| 77  | C5 | DZZ | 0.00000  | -0.39440 | 0.25975  | 0.00000  | 0.26792  |
| 78  | C5 | DXY | 0.00000  | -0.20324 | 0.01946  | 0.00000  | -0.08202 |
| 79  | C5 | DXZ | -0.34307 | 0.00000  | 0.00000  | -0.08070 | 0.00000  |
| 80  | C5 | DYZ | 0.12565  | 0.00000  | 0.00000  | -0.34428 | 0.00000  |
| 81  | C6 | S   | 0.00000  | 0.02008  | -0.00420 | 0.00000  | 0.00389  |
| 82  | C6 | S   | 0.00000  | 0.15749  | -0.07795 | 0.00000  | 0.20742  |
| 83  | C6 | PX  | 0.00000  | 0.01939  | -0.09810 | 0.00000  | 0.05354  |
| 84  | C6 | PY  | 0.00000  | 0.02363  | 0.05134  | 0.00000  | -0.16354 |
| 85  | C6 | PZ  | 0.03512  | 0.00000  | 0.00000  | 0.00964  | 0.00000  |
| 86  | C6 | S   | 0.00000  | -0.57155 | -1.58051 | 0.00000  | 1.21707  |
| 87  | C6 | PX  | 0.00000  | 0.05705  | -1.13788 | 0.00000  | -0.51592 |
| 88  | C6 | PY  | 0.00000  | -1.08016 | 0.55522  | 0.00000  | -0.58361 |
| 89  | C6 | PZ  | -0.07549 | 0.00000  | 0.00000  | 0.07183  | 0.00000  |
| 90  | C6 | DXX | 0.00000  | -0.18783 | -0.31250 | 0.00000  | 0.14708  |
| 91  | C6 | DYY | 0.00000  | -0.00439 | 0.25373  | 0.00000  | -0.06903 |
| 92  | C6 | DZZ | 0.00000  | 0.12517  | -0.07025 | 0.00000  | -0.04002 |
| 93  | C6 | DXY | 0.00000  | -0.07515 | -0.08929 | 0.00000  | -0.12556 |
| 94  | C6 | DXZ | -0.23129 | 0.00000  | 0.00000  | 0.01485  | 0.00000  |
| 95  | C6 | DYZ | -0.02476 | 0.00000  | 0.00000  | -0.33984 | 0.00000  |
| 96  | C7 | S   | 0.00000  | -0.03493 | 0.02605  | 0.00000  | -0.00262 |
| 97  | C7 | S   | 0.00000  | -0.32525 | 0.27435  | 0.00000  | 0.06847  |
| 98  | C7 | PX  | 0.00000  | 0.02287  | 0.02441  | 0.00000  | -0.04470 |
| 99  | C7 | PY  | 0.00000  | -0.10532 | 0.06999  | 0.00000  | 0.04618  |
| 100 | C7 | PZ  | 0.01379  | 0.00000  | 0.00000  | 0.03920  | 0.00000  |
| 101 | C7 | S   | 0.00000  | 2.42661  | -2.23153 | 0.00000  | -0.48934 |
| 102 | C7 | PX  | 0.00000  | -0.98616 | 1.40206  | 0.00000  | 0.13872  |
| 103 | C7 | PY  | 0.00000  | 0.12036  | 0.56375  | 0.00000  | 0.48171  |
| 104 | C7 | PZ  | 0.00697  | 0.00000  | 0.00000  | 0.08760  | 0.00000  |
| 105 | C7 | DXX | 0.00000  | 0.07689  | -0.11770 | 0.00000  | -0.00924 |
| 106 | C7 | DYY | 0.00000  | 0.06790  | 0.03921  | 0.00000  | 0.01752  |
| 107 | C7 | DZZ | 0.00000  | -0.21937 | 0.13702  | 0.00000  | -0.05130 |
| 108 | C7 | DXY | 0.00000  | 0.02817  | -0.14487 | 0.00000  | -0.24400 |
| 109 | C7 | DXZ | 0.05669  | 0.00000  | 0.00000  | 0.34468  | 0.00000  |
| 110 | C7 | DYZ | 0.24457  | 0.00000  | 0.00000  | -0.07137 | 0.00000  |
| 111 | O1 | S   | 0.00000  | 0.02194  | 0.01727  | 0.00000  | 0.02824  |
| 112 | O1 | S   | 0.00000  | 0.53565  | -0.17446 | 0.00000  | 0.30646  |
| 113 | O1 | PX  | 0.00000  | -0.00918 | 0.06776  | 0.00000  | -0.04668 |
| 114 | O1 | PY  | 0.00000  | -0.10849 | 0.20512  | 0.00000  | -0.02736 |

|     |    |     |          |          |          |          |          |
|-----|----|-----|----------|----------|----------|----------|----------|
| 115 | O1 | PZ  | -0.01000 | 0.00000  | 0.00000  | -0.00850 | 0.00000  |
| 116 | O1 | S   | 0.00000  | -1.64641 | 0.03466  | 0.00000  | -0.98345 |
| 117 | O1 | PX  | 0.00000  | -0.13464 | -0.31818 | 0.00000  | 0.00884  |
| 118 | O1 | PY  | 0.00000  | 0.65495  | -0.61625 | 0.00000  | -0.11573 |
| 119 | O1 | PZ  | 0.01555  | 0.00000  | 0.00000  | 0.03009  | 0.00000  |
| 120 | O1 | DXX | 0.00000  | 0.01535  | -0.08720 | 0.00000  | -0.09386 |
| 121 | O1 | DYY | 0.00000  | -0.17977 | 0.15051  | 0.00000  | 0.06142  |
| 122 | O1 | DZZ | 0.00000  | 0.29923  | -0.03710 | 0.00000  | 0.23449  |
| 123 | O1 | DXY | 0.00000  | -0.01022 | -0.20107 | 0.00000  | -0.23117 |
| 124 | O1 | DXZ | 0.03725  | 0.00000  | 0.00000  | 0.01318  | 0.00000  |
| 125 | O1 | DYZ | -0.09501 | 0.00000  | 0.00000  | -0.06104 | 0.00000  |
| 126 | H4 | S   | 0.00000  | -0.15612 | 0.07252  | 0.00000  | 0.12674  |
| 127 | H4 | S   | 0.00000  | 0.32338  | -0.30393 | 0.00000  | 0.01548  |
| 128 | H4 | PX  | 0.00000  | 0.43042  | 0.31976  | 0.00000  | -0.01369 |
| 129 | H4 | PY  | 0.00000  | 0.05129  | 0.39808  | 0.00000  | 0.00158  |
| 130 | H4 | PZ  | -0.50457 | 0.00000  | 0.00000  | 0.19821  | 0.00000  |
| 131 | N1 | S   | 0.00000  | 0.01698  | -0.00843 | 0.00000  | 0.00922  |
| 132 | N1 | S   | 0.00000  | 0.27490  | -0.31756 | 0.00000  | 0.22652  |
| 133 | N1 | PX  | 0.00000  | -0.01719 | -0.08036 | 0.00000  | -0.00578 |
| 134 | N1 | PY  | 0.00000  | -0.00268 | -0.10145 | 0.00000  | 0.05430  |
| 135 | N1 | PZ  | -0.00959 | 0.00000  | 0.00000  | -0.02926 | 0.00000  |
| 136 | N1 | S   | 0.00000  | -1.24880 | 1.03299  | 0.00000  | -1.09906 |
| 137 | N1 | PX  | 0.00000  | -0.27271 | 0.25991  | 0.00000  | -0.00936 |
| 138 | N1 | PY  | 0.00000  | -0.00376 | 0.27651  | 0.00000  | -0.78233 |
| 139 | N1 | PZ  | 0.09513  | 0.00000  | 0.00000  | -0.04251 | 0.00000  |
| 140 | N1 | DXX | 0.00000  | -0.18542 | -0.19045 | 0.00000  | 0.13931  |
| 141 | N1 | DYY | 0.00000  | 0.06451  | 0.19745  | 0.00000  | -0.22378 |
| 142 | N1 | DZZ | 0.00000  | 0.12701  | -0.07207 | 0.00000  | 0.07601  |
| 143 | N1 | DXY | 0.00000  | 0.10064  | 0.08085  | 0.00000  | -0.17101 |
| 144 | N1 | DXZ | 0.28997  | 0.00000  | 0.00000  | 0.09874  | 0.00000  |
| 145 | N1 | DYZ | -0.15797 | 0.00000  | 0.00000  | -0.30169 | 0.00000  |
| 146 | H6 | S   | 0.00000  | 0.21095  | 0.21626  | 0.00000  | -0.03527 |
| 147 | H6 | S   | 0.00000  | -0.07820 | 0.04532  | 0.00000  | 0.19728  |
| 148 | H6 | PX  | 0.00000  | -0.19877 | -0.02737 | 0.00000  | 0.20792  |
| 149 | H6 | PY  | 0.00000  | -0.01722 | -0.08329 | 0.00000  | -0.27043 |
| 150 | H6 | PZ  | -0.51345 | 0.00000  | 0.00000  | 0.01502  | 0.00000  |
| 151 | C8 | S   | 0.00000  | 0.00245  | -0.01772 | 0.00000  | 0.00119  |
| 152 | C8 | S   | 0.00000  | 0.19185  | -0.11092 | 0.00000  | -0.10254 |
| 153 | C8 | PX  | 0.00000  | -0.18030 | -0.02694 | 0.00000  | 0.09590  |
| 154 | C8 | PY  | 0.00000  | 0.02456  | 0.13345  | 0.00000  | 0.14770  |
| 155 | C8 | PZ  | -0.02905 | 0.00000  | 0.00000  | 0.10048  | 0.00000  |
| 156 | C8 | S   | 0.00000  | -0.46244 | 0.74863  | 0.00000  | -0.34664 |
| 157 | C8 | PX  | 0.00000  | -0.75020 | 0.73479  | 0.00000  | 0.24877  |
| 158 | C8 | PY  | 0.00000  | -0.81819 | 1.26521  | 0.00000  | 1.61516  |
| 159 | C8 | PZ  | -0.03917 | 0.00000  | 0.00000  | -0.06547 | 0.00000  |
| 160 | C8 | DXX | 0.00000  | 0.01337  | 0.12576  | 0.00000  | 0.07557  |
| 161 | C8 | DYY | 0.00000  | -0.01155 | -0.01824 | 0.00000  | -0.18858 |
| 162 | C8 | DZZ | 0.00000  | -0.01892 | -0.06384 | 0.00000  | 0.08841  |
| 163 | C8 | DXY | 0.00000  | -0.06900 | 0.06215  | 0.00000  | 0.04859  |
| 164 | C8 | DXZ | 0.30450  | 0.00000  | 0.00000  | 0.14943  | 0.00000  |
| 165 | C8 | DYZ | 0.04007  | 0.00000  | 0.00000  | -0.25336 | 0.00000  |
| 166 | H8 | S   | 0.00000  | -0.07509 | -0.01228 | 0.00000  | -0.01123 |
| 167 | H8 | S   | 0.00000  | 0.24994  | -0.37649 | 0.00000  | 0.03851  |
| 168 | H8 | PX  | 0.00000  | -0.04238 | 0.08156  | 0.00000  | -0.02931 |

|     |     |     |          |          |          |          |          |
|-----|-----|-----|----------|----------|----------|----------|----------|
| 169 | H8  | PY  | 0.00000  | 0.07120  | -0.12719 | 0.00000  | -0.02987 |
| 170 | H8  | PZ  | -0.06342 | 0.00000  | 0.00000  | -0.47328 | 0.00000  |
| 171 | C10 | S   | 0.00000  | 0.00036  | -0.01271 | 0.00000  | -0.01931 |
| 172 | C10 | S   | 0.00000  | -0.02156 | -0.03107 | 0.00000  | 0.00048  |
| 173 | C10 | PX  | 0.00000  | 0.05292  | -0.02012 | 0.00000  | -0.13213 |
| 174 | C10 | PY  | 0.00000  | -0.01909 | 0.04483  | 0.00000  | 0.18096  |
| 175 | C10 | PZ  | -0.01094 | 0.00000  | 0.00000  | 0.01985  | 0.00000  |
| 176 | C10 | S   | 0.00000  | -0.31807 | 0.73668  | 0.00000  | 1.42042  |
| 177 | C10 | PX  | 0.00000  | 0.48475  | -0.45814 | 0.00000  | -0.39820 |
| 178 | C10 | PY  | 0.00000  | -0.02156 | 0.35818  | 0.00000  | 0.61832  |
| 179 | C10 | PZ  | -0.01261 | 0.00000  | 0.00000  | 0.08908  | 0.00000  |
| 180 | C10 | DXX | 0.00000  | -0.05351 | 0.02764  | 0.00000  | 0.05042  |
| 181 | C10 | DYY | 0.00000  | 0.04764  | 0.07859  | 0.00000  | 0.10524  |
| 182 | C10 | DZZ | 0.00000  | 0.00040  | -0.11467 | 0.00000  | -0.16841 |
| 183 | C10 | DXY | 0.00000  | 0.13499  | -0.02990 | 0.00000  | -0.21872 |
| 184 | C10 | DXZ | 0.17443  | 0.00000  | 0.00000  | 0.26941  | 0.00000  |
| 185 | C10 | DYZ | 0.09094  | 0.00000  | 0.00000  | -0.45213 | 0.00000  |
| 186 | H16 | S   | 0.00000  | -0.00075 | -0.00281 | 0.00000  | -0.08574 |
| 187 | H16 | S   | 0.00000  | -0.22007 | 0.19860  | 0.00000  | 0.23790  |
| 188 | H16 | PX  | 0.00000  | 0.03880  | -0.03448 | 0.00000  | -0.09834 |
| 189 | H16 | PY  | 0.00000  | -0.09341 | -0.07611 | 0.00000  | 0.09259  |
| 190 | H16 | PZ  | -0.13607 | 0.00000  | 0.00000  | -0.52364 | 0.00000  |
| 191 | H18 | S   | 0.00000  | 0.00658  | -0.08708 | 0.00000  | -0.00261 |
| 192 | H18 | S   | 0.00000  | 0.21246  | -0.03441 | 0.00000  | -0.14344 |
| 193 | H18 | PX  | 0.00000  | -0.01621 | 0.01370  | 0.00000  | 0.09386  |
| 194 | H18 | PY  | 0.00000  | 0.12296  | -0.02730 | 0.00000  | -0.20708 |
| 195 | H18 | PZ  | 0.26500  | 0.00000  | 0.00000  | -0.20233 | 0.00000  |
| 196 | C9  | S   | 0.00000  | -0.00768 | -0.02227 | 0.00000  | -0.00958 |
| 197 | C9  | S   | 0.00000  | 0.01786  | -0.00116 | 0.00000  | 0.06611  |
| 198 | C9  | PX  | 0.00000  | -0.08499 | -0.17147 | 0.00000  | -0.18290 |
| 199 | C9  | PY  | 0.00000  | -0.08806 | -0.04673 | 0.00000  | -0.11051 |
| 200 | C9  | PZ  | -0.00073 | 0.00000  | 0.00000  | 0.00962  | 0.00000  |
| 201 | C9  | S   | 0.00000  | 0.26034  | 0.66881  | 0.00000  | 0.36019  |
| 202 | C9  | PX  | 0.00000  | 0.06704  | -0.36853 | 0.00000  | -0.38834 |
| 203 | C9  | PY  | 0.00000  | -0.23356 | -0.25567 | 0.00000  | 0.11448  |
| 204 | C9  | PZ  | 0.04538  | 0.00000  | 0.00000  | -0.00709 | 0.00000  |
| 205 | C9  | DXX | 0.00000  | -0.08850 | 0.09436  | 0.00000  | 0.09518  |
| 206 | C9  | DYY | 0.00000  | 0.14769  | -0.07600 | 0.00000  | -0.03265 |
| 207 | C9  | DZZ | 0.00000  | -0.04460 | -0.02221 | 0.00000  | 0.00915  |
| 208 | C9  | DXY | 0.00000  | 0.22744  | -0.03312 | 0.00000  | 0.08010  |
| 209 | C9  | DXZ | -0.04949 | 0.00000  | 0.00000  | -0.01121 | 0.00000  |
| 210 | C9  | DYZ | -0.02296 | 0.00000  | 0.00000  | -0.00181 | 0.00000  |
| 211 | H3  | S   | 0.00000  | -0.01827 | -0.01078 | 0.00000  | -0.03929 |
| 212 | H3  | S   | 0.00000  | 0.11701  | -0.00932 | 0.00000  | -0.15812 |
| 213 | H3  | PX  | 0.00000  | -0.22010 | 0.21450  | 0.00000  | 0.15526  |
| 214 | H3  | PY  | 0.00000  | -0.09291 | 0.06590  | 0.00000  | 0.06620  |
| 215 | H3  | PZ  | -0.00803 | 0.00000  | 0.00000  | -0.00125 | 0.00000  |
| 216 | H5  | S   | -0.01467 | 0.00961  | -0.05795 | -0.00200 | 0.03291  |
| 217 | H5  | S   | 0.04232  | -0.14947 | 0.04045  | 0.00283  | -0.00550 |
| 218 | H5  | PX  | -0.05009 | 0.06828  | 0.06834  | -0.01717 | 0.14691  |
| 219 | H5  | PY  | -0.02396 | 0.12915  | 0.01359  | -0.00771 | 0.06521  |
| 220 | H5  | PZ  | -0.00787 | -0.03281 | 0.04439  | 0.00440  | 0.07029  |
| 221 | H7  | S   | 0.01467  | 0.00961  | -0.05795 | 0.00200  | 0.03291  |
| 222 | H7  | S   | -0.04232 | -0.14947 | 0.04045  | -0.00283 | -0.00550 |



|     |    |    |          |         |          |         |          |
|-----|----|----|----------|---------|----------|---------|----------|
| 223 | H7 | PX | 0.05009  | 0.06828 | 0.06834  | 0.01717 | 0.14691  |
| 224 | H7 | PY | 0.02396  | 0.12915 | 0.01359  | 0.00771 | 0.06521  |
| 225 | H7 | PZ | -0.00787 | 0.03281 | -0.04439 | 0.00440 | -0.07029 |

|              |  |          |          |          |          |          |
|--------------|--|----------|----------|----------|----------|----------|
| MO:          |  | 176      | 177      | 178      | 179      | 180      |
| Eigenvalues: |  | 2.85185  | 2.85480  | 2.88036  | 2.90289  | 2.92225  |
| (ev):        |  | 77.60292 | 77.68298 | 78.37870 | 78.99170 | 79.51862 |

|    |    | A   | A        | A        | A        | A        |          |
|----|----|-----|----------|----------|----------|----------|----------|
| 1  | H1 | S   | 0.00000  | -0.02579 | 0.00000  | -0.05860 | 0.00125  |
| 2  | H1 | S   | 0.00000  | 0.20113  | 0.00000  | 0.06948  | -0.01798 |
| 3  | H1 | PX  | 0.00000  | -0.06758 | 0.00000  | 0.05083  | -0.15170 |
| 4  | H1 | PY  | 0.00000  | -0.12370 | 0.00000  | -0.24263 | 0.08485  |
| 5  | H1 | PZ  | -0.19835 | 0.00000  | -0.47410 | 0.00000  | 0.00000  |
| 6  | C1 | S   | 0.00000  | -0.00680 | 0.00000  | 0.01547  | -0.02752 |
| 7  | C1 | S   | 0.00000  | 0.01509  | 0.00000  | 0.10653  | -0.11683 |
| 8  | C1 | PX  | 0.00000  | -0.11314 | 0.00000  | -0.05382 | -0.10914 |
| 9  | C1 | PY  | 0.00000  | -0.06232 | 0.00000  | 0.08007  | -0.05751 |
| 10 | C1 | PZ  | 0.02689  | 0.00000  | 0.02666  | 0.00000  | 0.00000  |
| 11 | C1 | S   | 0.00000  | 0.12138  | 0.00000  | -1.19992 | 1.19608  |
| 12 | C1 | PX  | 0.00000  | -0.85678 | 0.00000  | -0.38895 | 0.19202  |
| 13 | C1 | PY  | 0.00000  | 1.74582  | 0.00000  | 2.55666  | -1.51334 |
| 14 | C1 | PZ  | 0.09791  | 0.00000  | 0.07670  | 0.00000  | 0.00000  |
| 15 | C1 | DXX | 0.00000  | 0.18366  | 0.00000  | 0.10111  | 0.04452  |
| 16 | C1 | DYY | 0.00000  | -0.12211 | 0.00000  | -0.17908 | 0.09590  |
| 17 | C1 | DZZ | 0.00000  | -0.07680 | 0.00000  | 0.05458  | -0.18541 |
| 18 | C1 | DXY | 0.00000  | -0.05263 | 0.00000  | -0.07906 | -0.02486 |
| 19 | C1 | DXZ | 0.07471  | 0.00000  | 0.42482  | 0.00000  | 0.00000  |
| 20 | C1 | DYZ | 0.14738  | 0.00000  | -0.02643 | 0.00000  | 0.00000  |
| 21 | C2 | S   | 0.00000  | -0.00472 | 0.00000  | 0.02982  | -0.00031 |
| 22 | C2 | S   | 0.00000  | -0.15250 | 0.00000  | 0.08110  | -0.08028 |
| 23 | C2 | PX  | 0.00000  | -0.03039 | 0.00000  | -0.24491 | 0.03306  |
| 24 | C2 | PY  | 0.00000  | -0.31259 | 0.00000  | 0.03415  | 0.17049  |
| 25 | C2 | PZ  | -0.01230 | 0.00000  | 0.01059  | 0.00000  | 0.00000  |
| 26 | C2 | S   | 0.00000  | -0.24168 | 0.00000  | -0.34662 | 0.69318  |
| 27 | C2 | PX  | 0.00000  | 0.76218  | 0.00000  | -0.95677 | 0.02939  |
| 28 | C2 | PY  | 0.00000  | -3.16160 | 0.00000  | 0.13005  | 1.71444  |
| 29 | C2 | PZ  | -0.05736 | 0.00000  | 0.01326  | 0.00000  | 0.00000  |
| 30 | C2 | DXX | 0.00000  | 0.08494  | 0.00000  | -0.25674 | -0.04756 |
| 31 | C2 | DYY | 0.00000  | -0.19275 | 0.00000  | 0.06477  | 0.10443  |
| 32 | C2 | DZZ | 0.00000  | 0.02553  | 0.00000  | 0.22614  | -0.02895 |
| 33 | C2 | DXY | 0.00000  | -0.18388 | 0.00000  | 0.06696  | 0.25564  |
| 34 | C2 | DXZ | -0.00886 | 0.00000  | -0.18071 | 0.00000  | 0.00000  |
| 35 | C2 | DYZ | -0.15624 | 0.00000  | 0.17096  | 0.00000  | 0.00000  |
| 36 | C3 | S   | 0.00000  | 0.03151  | 0.00000  | -0.00332 | 0.03834  |
| 37 | C3 | S   | 0.00000  | 0.16185  | 0.00000  | 0.10813  | 0.14918  |
| 38 | C3 | PX  | 0.00000  | 0.08206  | 0.00000  | 0.02564  | 0.01485  |
| 39 | C3 | PY  | 0.00000  | -0.06881 | 0.00000  | -0.06122 | -0.04287 |
| 40 | C3 | PZ  | 0.05072  | 0.00000  | 0.01453  | 0.00000  | 0.00000  |
| 41 | C3 | S   | 0.00000  | -1.81454 | 0.00000  | 0.26316  | -1.60599 |
| 42 | C3 | PX  | 0.00000  | 1.39810  | 0.00000  | 1.79603  | -2.49757 |
| 43 | C3 | PY  | 0.00000  | 2.50947  | 0.00000  | 2.54958  | -0.57723 |
| 44 | C3 | PZ  | -0.04661 | 0.00000  | -0.01754 | 0.00000  | 0.00000  |
| 45 | C3 | DXX | 0.00000  | -0.00636 | 0.00000  | -0.14836 | 0.08086  |

|    |    |     |          |          |          |          |          |
|----|----|-----|----------|----------|----------|----------|----------|
| 46 | C3 | DYY | 0.00000  | -0.10407 | 0.00000  | 0.24121  | -0.29761 |
| 47 | C3 | DZZ | 0.00000  | 0.17753  | 0.00000  | -0.04973 | 0.28449  |
| 48 | C3 | DXY | 0.00000  | -0.10077 | 0.00000  | 0.02757  | 0.29818  |
| 49 | C3 | DXZ | 0.28833  | 0.00000  | -0.20606 | 0.00000  | 0.00000  |
| 50 | C3 | DYZ | -0.09280 | 0.00000  | -0.00504 | 0.00000  | 0.00000  |
| 51 | C4 | S   | 0.00000  | 0.00774  | 0.00000  | 0.05329  | 0.00386  |
| 52 | C4 | S   | 0.00000  | 0.08323  | 0.00000  | -0.14079 | 0.25524  |
| 53 | C4 | PX  | 0.00000  | -0.12082 | 0.00000  | -0.08141 | -0.04034 |
| 54 | C4 | PY  | 0.00000  | 0.01951  | 0.00000  | -0.24859 | 0.21070  |
| 55 | C4 | PZ  | 0.00180  | 0.00000  | 0.08020  | 0.00000  | 0.00000  |
| 56 | C4 | S   | 0.00000  | -0.80589 | 0.00000  | -3.04476 | 0.19176  |
| 57 | C4 | PX  | 0.00000  | -1.58567 | 0.00000  | -0.63164 | 0.87690  |
| 58 | C4 | PY  | 0.00000  | 0.82713  | 0.00000  | -0.47023 | 0.66033  |
| 59 | C4 | PZ  | -0.12398 | 0.00000  | -0.10878 | 0.00000  | 0.00000  |
| 60 | C4 | DXX | 0.00000  | 0.22015  | 0.00000  | -0.02251 | -0.02138 |
| 61 | C4 | DYY | 0.00000  | -0.25727 | 0.00000  | -0.27077 | 0.01359  |
| 62 | C4 | DZZ | 0.00000  | 0.06337  | 0.00000  | 0.45339  | -0.04567 |
| 63 | C4 | DXY | 0.00000  | 0.08759  | 0.00000  | -0.11411 | 0.07607  |
| 64 | C4 | DXZ | -0.28439 | 0.00000  | 0.14881  | 0.00000  | 0.00000  |
| 65 | C4 | DYZ | -0.26463 | 0.00000  | -0.10240 | 0.00000  | 0.00000  |
| 66 | C5 | S   | 0.00000  | -0.02906 | 0.00000  | -0.02243 | 0.01889  |
| 67 | C5 | S   | 0.00000  | -0.14838 | 0.00000  | -0.08370 | -0.00208 |
| 68 | C5 | PX  | 0.00000  | -0.10594 | 0.00000  | 0.10687  | 0.00075  |
| 69 | C5 | PY  | 0.00000  | -0.24912 | 0.00000  | -0.07433 | 0.11854  |
| 70 | C5 | PZ  | 0.02823  | 0.00000  | -0.02361 | 0.00000  | 0.00000  |
| 71 | C5 | S   | 0.00000  | 2.09808  | 0.00000  | 0.54125  | -1.04411 |
| 72 | C5 | PX  | 0.00000  | -1.26176 | 0.00000  | 0.78153  | 0.77038  |
| 73 | C5 | PY  | 0.00000  | -2.09985 | 0.00000  | 0.09142  | 1.13619  |
| 74 | C5 | PZ  | 0.10768  | 0.00000  | 0.02439  | 0.00000  | 0.00000  |
| 75 | C5 | DXX | 0.00000  | -0.23223 | 0.00000  | -0.09613 | 0.05486  |
| 76 | C5 | DYY | 0.00000  | 0.44134  | 0.00000  | 0.13033  | -0.18988 |
| 77 | C5 | DZZ | 0.00000  | -0.25170 | 0.00000  | -0.15249 | 0.13105  |
| 78 | C5 | DXY | 0.00000  | 0.02540  | 0.00000  | -0.09769 | -0.00667 |
| 79 | C5 | DXZ | -0.42214 | 0.00000  | 0.13305  | 0.00000  | 0.00000  |
| 80 | C5 | DYZ | 0.02937  | 0.00000  | 0.09933  | 0.00000  | 0.00000  |
| 81 | C6 | S   | 0.00000  | 0.01189  | 0.00000  | -0.06770 | 0.00919  |
| 82 | C6 | S   | 0.00000  | 0.00791  | 0.00000  | -0.23606 | 0.12819  |
| 83 | C6 | PX  | 0.00000  | 0.02382  | 0.00000  | -0.05915 | -0.06712 |
| 84 | C6 | PY  | 0.00000  | 0.05413  | 0.00000  | 0.23845  | 0.10244  |
| 85 | C6 | PZ  | -0.09556 | 0.00000  | -0.01332 | 0.00000  | 0.00000  |
| 86 | C6 | S   | 0.00000  | -0.20785 | 0.00000  | 2.85803  | -0.59950 |
| 87 | C6 | PX  | 0.00000  | 3.20606  | 0.00000  | 1.22411  | -1.76411 |
| 88 | C6 | PY  | 0.00000  | -0.93276 | 0.00000  | 0.19443  | -0.30772 |
| 89 | C6 | PZ  | -0.03202 | 0.00000  | -0.02224 | 0.00000  | 0.00000  |
| 90 | C6 | DXX | 0.00000  | 0.12322  | 0.00000  | 0.07860  | 0.04800  |
| 91 | C6 | DYY | 0.00000  | -0.18870 | 0.00000  | 0.13715  | -0.13982 |
| 92 | C6 | DZZ | 0.00000  | 0.11491  | 0.00000  | -0.40052 | 0.01064  |
| 93 | C6 | DXY | 0.00000  | 0.15783  | 0.00000  | -0.31926 | -0.16323 |
| 94 | C6 | DXZ | 0.23132  | 0.00000  | -0.21717 | 0.00000  | 0.00000  |
| 95 | C6 | DYZ | 0.43108  | 0.00000  | 0.13161  | 0.00000  | 0.00000  |
| 96 | C7 | S   | 0.00000  | 0.01913  | 0.00000  | 0.02368  | 0.00038  |
| 97 | C7 | S   | 0.00000  | -0.00004 | 0.00000  | 0.01128  | -0.00585 |
| 98 | C7 | PX  | 0.00000  | -0.06660 | 0.00000  | 0.05158  | -0.00226 |
| 99 | C7 | PY  | 0.00000  | 0.06327  | 0.00000  | 0.03130  | 0.30030  |

|     |    |     |          |          |          |          |          |
|-----|----|-----|----------|----------|----------|----------|----------|
| 100 | C7 | PZ  | -0.00919 | 0.00000  | 0.02365  | 0.00000  | 0.00000  |
| 101 | C7 | S   | 0.00000  | 0.86443  | 0.00000  | 0.32220  | 0.45703  |
| 102 | C7 | PX  | 0.00000  | -0.80378 | 0.00000  | -0.42867 | 0.55457  |
| 103 | C7 | PY  | 0.00000  | 0.33971  | 0.00000  | -0.24302 | 1.77010  |
| 104 | C7 | PZ  | 0.03857  | 0.00000  | 0.01786  | 0.00000  | 0.00000  |
| 105 | C7 | DXX | 0.00000  | 0.12226  | 0.00000  | 0.01614  | 0.01442  |
| 106 | C7 | DYY | 0.00000  | -0.24694 | 0.00000  | -0.15747 | 0.11877  |
| 107 | C7 | DZZ | 0.00000  | 0.15212  | 0.00000  | 0.18602  | -0.04140 |
| 108 | C7 | DXY | 0.00000  | -0.09453 | 0.00000  | 0.01232  | 0.03234  |
| 109 | C7 | DXZ | 0.20226  | 0.00000  | 0.04633  | 0.00000  | 0.00000  |
| 110 | C7 | DYZ | -0.22922 | 0.00000  | 0.08859  | 0.00000  | 0.00000  |
| 111 | O1 | S   | 0.00000  | 0.01548  | 0.00000  | -0.04827 | 0.02877  |
| 112 | O1 | S   | 0.00000  | 0.26894  | 0.00000  | -0.71403 | 0.53133  |
| 113 | O1 | PX  | 0.00000  | 0.00860  | 0.00000  | -0.09597 | -0.00538 |
| 114 | O1 | PY  | 0.00000  | -0.06634 | 0.00000  | -0.05995 | -0.03172 |
| 115 | O1 | PZ  | -0.03179 | 0.00000  | -0.04117 | 0.00000  | 0.00000  |
| 116 | O1 | S   | 0.00000  | -0.86704 | 0.00000  | 2.63501  | -1.68810 |
| 117 | O1 | PX  | 0.00000  | -0.14093 | 0.00000  | 0.75024  | -0.27792 |
| 118 | O1 | PY  | 0.00000  | -0.22522 | 0.00000  | -0.64965 | 0.36923  |
| 119 | O1 | PZ  | 0.19369  | 0.00000  | 0.31405  | 0.00000  | 0.00000  |
| 120 | O1 | DXX | 0.00000  | 0.10080  | 0.00000  | 0.11190  | -0.03159 |
| 121 | O1 | DYY | 0.00000  | -0.01447 | 0.00000  | 0.13596  | -0.09270 |
| 122 | O1 | DZZ | 0.00000  | 0.09355  | 0.00000  | -0.43195 | 0.28637  |
| 123 | O1 | DXY | 0.00000  | -0.33207 | 0.00000  | -0.05288 | -0.10348 |
| 124 | O1 | DXZ | 0.14239  | 0.00000  | 0.33118  | 0.00000  | 0.00000  |
| 125 | O1 | DYZ | -0.17908 | 0.00000  | 0.19515  | 0.00000  | 0.00000  |
| 126 | H4 | S   | 0.00000  | -0.08765 | 0.00000  | -0.02581 | 0.04896  |
| 127 | H4 | S   | 0.00000  | 0.14752  | 0.00000  | 0.24942  | -0.09222 |
| 128 | H4 | PX  | 0.00000  | 0.10868  | 0.00000  | -0.07627 | -0.15890 |
| 129 | H4 | PY  | 0.00000  | -0.00322 | 0.00000  | -0.32601 | -0.11797 |
| 130 | H4 | PZ  | -0.41136 | 0.00000  | 0.01925  | 0.00000  | 0.00000  |
| 131 | N1 | S   | 0.00000  | -0.01167 | 0.00000  | 0.00255  | 0.02173  |
| 132 | N1 | S   | 0.00000  | -0.08332 | 0.00000  | 0.13816  | 0.28309  |
| 133 | N1 | PX  | 0.00000  | -0.03709 | 0.00000  | 0.00601  | -0.01347 |
| 134 | N1 | PY  | 0.00000  | 0.08219  | 0.00000  | -0.09597 | 0.12345  |
| 135 | N1 | PZ  | 0.03790  | 0.00000  | 0.00368  | 0.00000  | 0.00000  |
| 136 | N1 | S   | 0.00000  | 0.43242  | 0.00000  | -0.97303 | -1.10556 |
| 137 | N1 | PX  | 0.00000  | -0.00468 | 0.00000  | -0.73782 | -0.28494 |
| 138 | N1 | PY  | 0.00000  | -0.08063 | 0.00000  | 0.35219  | -0.09713 |
| 139 | N1 | PZ  | 0.13188  | 0.00000  | 0.03398  | 0.00000  | 0.00000  |
| 140 | N1 | DXX | 0.00000  | 0.09306  | 0.00000  | -0.31642 | -0.27747 |
| 141 | N1 | DYY | 0.00000  | 0.02000  | 0.00000  | 0.20984  | 0.15442  |
| 142 | N1 | DZZ | 0.00000  | -0.09881 | 0.00000  | 0.02560  | 0.19200  |
| 143 | N1 | DXY | 0.00000  | -0.11645 | 0.00000  | 0.04102  | 0.22865  |
| 144 | N1 | DXZ | -0.02947 | 0.00000  | 0.05004  | 0.00000  | 0.00000  |
| 145 | N1 | DYZ | 0.44553  | 0.00000  | 0.08683  | 0.00000  | 0.00000  |
| 146 | H6 | S   | 0.00000  | -0.03500 | 0.00000  | -0.01376 | 0.02275  |
| 147 | H6 | S   | 0.00000  | -0.06557 | 0.00000  | -0.42093 | 0.20389  |
| 148 | H6 | PX  | 0.00000  | -0.17666 | 0.00000  | -0.16988 | 0.12695  |
| 149 | H6 | PY  | 0.00000  | 0.54267  | 0.00000  | -0.12683 | -0.05779 |
| 150 | H6 | PZ  | -0.01816 | 0.00000  | -0.13574 | 0.00000  | 0.00000  |
| 151 | C8 | S   | 0.00000  | -0.01593 | 0.00000  | -0.00331 | -0.06101 |
| 152 | C8 | S   | 0.00000  | -0.02317 | 0.00000  | 0.16367  | -0.17235 |
| 153 | C8 | PX  | 0.00000  | 0.13841  | 0.00000  | -0.20059 | -0.23946 |

|     |     |     |          |          |          |          |          |
|-----|-----|-----|----------|----------|----------|----------|----------|
| 154 | C8  | PY  | 0.00000  | -0.11064 | 0.00000  | 0.22780  | -0.09399 |
| 155 | C8  | PZ  | 0.03273  | 0.00000  | -0.01532 | 0.00000  | 0.00000  |
| 156 | C8  | S   | 0.00000  | 0.34599  | 0.00000  | -0.22664 | 2.53045  |
| 157 | C8  | PX  | 0.00000  | 0.65437  | 0.00000  | -0.65600 | 0.40921  |
| 158 | C8  | PY  | 0.00000  | -0.84105 | 0.00000  | 0.55991  | 0.60363  |
| 159 | C8  | PZ  | -0.04393 | 0.00000  | 0.00015  | 0.00000  | 0.00000  |
| 160 | C8  | DXX | 0.00000  | 0.00726  | 0.00000  | 0.17188  | 0.12753  |
| 161 | C8  | DYY | 0.00000  | 0.15957  | 0.00000  | -0.15573 | 0.31115  |
| 162 | C8  | DZZ | 0.00000  | -0.18499 | 0.00000  | -0.01046 | -0.45550 |
| 163 | C8  | DXY | 0.00000  | -0.00021 | 0.00000  | 0.20108  | 0.13517  |
| 164 | C8  | DXZ | -0.05983 | 0.00000  | -0.01884 | 0.00000  | 0.00000  |
| 165 | C8  | DYZ | -0.06489 | 0.00000  | 0.07087  | 0.00000  | 0.00000  |
| 166 | H8  | S   | 0.00000  | 0.01615  | 0.00000  | 0.02424  | -0.08909 |
| 167 | H8  | S   | 0.00000  | 0.30616  | 0.00000  | 0.13578  | -0.20063 |
| 168 | H8  | PX  | 0.00000  | -0.09163 | 0.00000  | 0.01386  | -0.00566 |
| 169 | H8  | PY  | 0.00000  | -0.05040 | 0.00000  | -0.11165 | -0.60407 |
| 170 | H8  | PZ  | -0.24322 | 0.00000  | -0.06633 | 0.00000  | 0.00000  |
| 171 | C10 | S   | 0.00000  | 0.01719  | 0.00000  | -0.01296 | 0.00832  |
| 172 | C10 | S   | 0.00000  | 0.00250  | 0.00000  | -0.00825 | -0.07556 |
| 173 | C10 | PX  | 0.00000  | -0.02770 | 0.00000  | 0.06885  | 0.18009  |
| 174 | C10 | PY  | 0.00000  | -0.17444 | 0.00000  | 0.16980  | -0.23307 |
| 175 | C10 | PZ  | 0.00253  | 0.00000  | 0.00365  | 0.00000  | 0.00000  |
| 176 | C10 | S   | 0.00000  | -0.98273 | 0.00000  | 0.70710  | -0.40717 |
| 177 | C10 | PX  | 0.00000  | -0.14467 | 0.00000  | 0.08062  | 0.18263  |
| 178 | C10 | PY  | 0.00000  | -0.52170 | 0.00000  | 0.50451  | -0.08822 |
| 179 | C10 | PZ  | 0.02411  | 0.00000  | -0.01079 | 0.00000  | 0.00000  |
| 180 | C10 | DXX | 0.00000  | 0.05819  | 0.00000  | -0.00836 | -0.00548 |
| 181 | C10 | DYY | 0.00000  | -0.18231 | 0.00000  | 0.16861  | -0.04494 |
| 182 | C10 | DZZ | 0.00000  | 0.16546  | 0.00000  | -0.13394 | 0.07352  |
| 183 | C10 | DXY | 0.00000  | -0.05554 | 0.00000  | 0.11776  | 0.23428  |
| 184 | C10 | DXZ | -0.28846 | 0.00000  | 0.17649  | 0.00000  | 0.00000  |
| 185 | C10 | DYZ | -0.15242 | 0.00000  | 0.12978  | 0.00000  | 0.00000  |
| 186 | H16 | S   | 0.00000  | 0.03040  | 0.00000  | -0.01714 | -0.00880 |
| 187 | H16 | S   | 0.00000  | 0.10064  | 0.00000  | -0.04934 | -0.09540 |
| 188 | H16 | PX  | 0.00000  | 0.01553  | 0.00000  | -0.00038 | 0.16219  |
| 189 | H16 | PY  | 0.00000  | 0.12005  | 0.00000  | -0.22690 | -0.17551 |
| 190 | H16 | PZ  | 0.20861  | 0.00000  | -0.11466 | 0.00000  | 0.00000  |
| 191 | H18 | S   | 0.00000  | 0.03873  | 0.00000  | -0.06947 | -0.03686 |
| 192 | H18 | S   | 0.00000  | -0.17559 | 0.00000  | 0.21521  | 0.22852  |
| 193 | H18 | PX  | 0.00000  | -0.06679 | 0.00000  | 0.09349  | -0.09500 |
| 194 | H18 | PY  | 0.00000  | -0.08355 | 0.00000  | 0.05695  | 0.22646  |
| 195 | H18 | PZ  | -0.34460 | 0.00000  | 0.22244  | 0.00000  | 0.00000  |
| 196 | C9  | S   | 0.00000  | -0.00856 | 0.00000  | 0.03176  | -0.01661 |
| 197 | C9  | S   | 0.00000  | 0.10304  | 0.00000  | 0.00529  | 0.01416  |
| 198 | C9  | PX  | 0.00000  | -0.21416 | 0.00000  | 0.24970  | -0.18086 |
| 199 | C9  | PY  | 0.00000  | -0.05340 | 0.00000  | 0.15194  | -0.07672 |
| 200 | C9  | PZ  | -0.01763 | 0.00000  | -0.12769 | 0.00000  | 0.00000  |
| 201 | C9  | S   | 0.00000  | 0.31421  | 0.00000  | -0.99123 | 0.45246  |
| 202 | C9  | PX  | 0.00000  | -0.48354 | 0.00000  | 0.09080  | -0.18902 |
| 203 | C9  | PY  | 0.00000  | 0.33737  | 0.00000  | 0.80396  | -0.26390 |
| 204 | C9  | PZ  | -0.17863 | 0.00000  | -0.61639 | 0.00000  | 0.00000  |
| 205 | C9  | DXX | 0.00000  | 0.14559  | 0.00000  | 0.13381  | -0.02907 |
| 206 | C9  | DYY | 0.00000  | -0.25297 | 0.00000  | -0.14398 | -0.00911 |
| 207 | C9  | DZZ | 0.00000  | 0.10042  | 0.00000  | 0.05981  | 0.03014  |

|     |    |     |          |          |          |          |          |
|-----|----|-----|----------|----------|----------|----------|----------|
| 208 | C9 | DXY | 0.00000  | -0.08153 | 0.00000  | -0.23536 | 0.08737  |
| 209 | C9 | DXZ | 0.08762  | 0.00000  | 0.43439  | 0.00000  | 0.00000  |
| 210 | C9 | DYZ | -0.01716 | 0.00000  | 0.04108  | 0.00000  | 0.00000  |
| 211 | H3 | S   | 0.00000  | -0.01234 | 0.00000  | -0.00332 | 0.00218  |
| 212 | H3 | S   | 0.00000  | -0.32981 | 0.00000  | -0.30375 | 0.04931  |
| 213 | H3 | PX  | 0.00000  | 0.34019  | 0.00000  | 0.08002  | 0.07913  |
| 214 | H3 | PY  | 0.00000  | 0.13009  | 0.00000  | 0.11529  | -0.01017 |
| 215 | H3 | PZ  | 0.12983  | 0.00000  | 0.38622  | 0.00000  | 0.00000  |
| 216 | H5 | S   | 0.00108  | 0.01314  | 0.03572  | 0.09777  | -0.04116 |
| 217 | H5 | S   | -0.08791 | 0.11899  | -0.39100 | 0.19745  | -0.03571 |
| 218 | H5 | PX  | 0.04817  | 0.13321  | 0.34104  | -0.11942 | 0.13245  |
| 219 | H5 | PY  | -0.03449 | -0.10875 | -0.01789 | -0.18716 | 0.06037  |
| 220 | H5 | PZ  | 0.03520  | 0.18423  | 0.07121  | 0.01686  | 0.06999  |
| 221 | H7 | S   | -0.00108 | 0.01314  | -0.03572 | 0.09777  | -0.04116 |
| 222 | H7 | S   | 0.08791  | 0.11899  | 0.39100  | 0.19745  | -0.03571 |
| 223 | H7 | PX  | -0.04817 | 0.13321  | -0.34104 | -0.11942 | 0.13245  |
| 224 | H7 | PY  | 0.03449  | -0.10875 | 0.01789  | -0.18716 | 0.06037  |
| 225 | H7 | PZ  | 0.03520  | -0.18423 | 0.07121  | -0.01686 | -0.06999 |

|              |          |          |          |          |          |
|--------------|----------|----------|----------|----------|----------|
| MO:          | 181      | 182      | 183      | 184      | 185      |
| Eigenvalues: | 2.94553  | 2.94938  | 2.97878  | 3.01727  | 3.01793  |
| (ev):        | 80.15209 | 80.25685 | 81.05685 | 82.10424 | 82.12217 |

|    |    |     |          |          |          |          |          |
|----|----|-----|----------|----------|----------|----------|----------|
|    |    | A   | A        | A        | A        | A        |          |
| 1  | H1 | S   | 0.00000  | -0.10624 | 0.00000  | -0.09706 | 0.00000  |
| 2  | H1 | S   | 0.00000  | 0.05306  | 0.00000  | -0.16669 | 0.00000  |
| 3  | H1 | PX  | 0.00000  | -0.04889 | 0.00000  | -0.15534 | 0.00000  |
| 4  | H1 | PY  | 0.00000  | -0.14138 | 0.00000  | 0.37878  | 0.00000  |
| 5  | H1 | PZ  | -0.30449 | 0.00000  | -0.06437 | 0.00000  | 0.12034  |
| 6  | C1 | S   | 0.00000  | -0.02180 | 0.00000  | -0.04293 | 0.00000  |
| 7  | C1 | S   | 0.00000  | -0.06441 | 0.00000  | -0.01568 | 0.00000  |
| 8  | C1 | PX  | 0.00000  | -0.13272 | 0.00000  | -0.11929 | 0.00000  |
| 9  | C1 | PY  | 0.00000  | -0.07582 | 0.00000  | 0.15184  | 0.00000  |
| 10 | C1 | PZ  | 0.00010  | 0.00000  | -0.01609 | 0.00000  | 0.04020  |
| 11 | C1 | S   | 0.00000  | 1.09094  | 0.00000  | 0.97688  | 0.00000  |
| 12 | C1 | PX  | 0.00000  | -0.46340 | 0.00000  | 0.98631  | 0.00000  |
| 13 | C1 | PY  | 0.00000  | 1.49613  | 0.00000  | -1.88169 | 0.00000  |
| 14 | C1 | PZ  | 0.04819  | 0.00000  | 0.03091  | 0.00000  | 0.03282  |
| 15 | C1 | DXX | 0.00000  | 0.12368  | 0.00000  | 0.10072  | 0.00000  |
| 16 | C1 | DYY | 0.00000  | 0.03088  | 0.00000  | 0.07453  | 0.00000  |
| 17 | C1 | DZZ | 0.00000  | -0.17930 | 0.00000  | -0.32900 | 0.00000  |
| 18 | C1 | DXY | 0.00000  | -0.05096 | 0.00000  | -0.34579 | 0.00000  |
| 19 | C1 | DXZ | 0.25809  | 0.00000  | 0.06739  | 0.00000  | -0.27956 |
| 20 | C1 | DYZ | 0.19486  | 0.00000  | 0.02565  | 0.00000  | 0.24097  |
| 21 | C2 | S   | 0.00000  | 0.00451  | 0.00000  | -0.00986 | 0.00000  |
| 22 | C2 | S   | 0.00000  | 0.01171  | 0.00000  | -0.06691 | 0.00000  |
| 23 | C2 | PX  | 0.00000  | 0.05798  | 0.00000  | 0.13268  | 0.00000  |
| 24 | C2 | PY  | 0.00000  | 0.06098  | 0.00000  | -0.17526 | 0.00000  |
| 25 | C2 | PZ  | -0.02602 | 0.00000  | 0.00966  | 0.00000  | -0.00254 |
| 26 | C2 | S   | 0.00000  | -0.34159 | 0.00000  | 0.74961  | 0.00000  |
| 27 | C2 | PX  | 0.00000  | 0.37661  | 0.00000  | 0.43237  | 0.00000  |
| 28 | C2 | PY  | 0.00000  | -0.29825 | 0.00000  | 2.05918  | 0.00000  |
| 29 | C2 | PZ  | 0.04543  | 0.00000  | -0.01976 | 0.00000  | -0.08845 |
| 30 | C2 | DXX | 0.00000  | 0.13370  | 0.00000  | 0.13494  | 0.00000  |

|    |    |     |          |          |          |          |          |
|----|----|-----|----------|----------|----------|----------|----------|
| 31 | C2 | DYY | 0.00000  | -0.09548 | 0.00000  | -0.04420 | 0.00000  |
| 32 | C2 | DZZ | 0.00000  | 0.00634  | 0.00000  | -0.03559 | 0.00000  |
| 33 | C2 | DXY | 0.00000  | -0.11161 | 0.00000  | -0.06360 | 0.00000  |
| 34 | C2 | DXZ | -0.28885 | 0.00000  | 0.08565  | 0.00000  | 0.38337  |
| 35 | C2 | DYZ | -0.41836 | 0.00000  | -0.08317 | 0.00000  | -0.17567 |
| 36 | C3 | S   | 0.00000  | 0.01521  | 0.00000  | -0.05194 | 0.00000  |
| 37 | C3 | S   | 0.00000  | -0.01264 | 0.00000  | -0.38858 | 0.00000  |
| 38 | C3 | PX  | 0.00000  | -0.00982 | 0.00000  | -0.16624 | 0.00000  |
| 39 | C3 | PY  | 0.00000  | -0.02702 | 0.00000  | 0.14373  | 0.00000  |
| 40 | C3 | PZ  | 0.00744  | 0.00000  | 0.02435  | 0.00000  | 0.01254  |
| 41 | C3 | S   | 0.00000  | 0.20949  | 0.00000  | 3.16397  | 0.00000  |
| 42 | C3 | PX  | 0.00000  | -0.14282 | 0.00000  | -3.93545 | 0.00000  |
| 43 | C3 | PY  | 0.00000  | 0.87176  | 0.00000  | -2.62850 | 0.00000  |
| 44 | C3 | PZ  | -0.05597 | 0.00000  | -0.03368 | 0.00000  | -0.05289 |
| 45 | C3 | DXX | 0.00000  | 0.07350  | 0.00000  | 0.32230  | 0.00000  |
| 46 | C3 | DYY | 0.00000  | -0.15395 | 0.00000  | -0.14792 | 0.00000  |
| 47 | C3 | DZZ | 0.00000  | 0.14051  | 0.00000  | -0.21449 | 0.00000  |
| 48 | C3 | DXY | 0.00000  | 0.13006  | 0.00000  | 0.30821  | 0.00000  |
| 49 | C3 | DXZ | -0.03047 | 0.00000  | 0.21142  | 0.00000  | 0.06732  |
| 50 | C3 | DYZ | 0.23334  | 0.00000  | -0.02828 | 0.00000  | 0.15617  |
| 51 | C4 | S   | 0.00000  | -0.00546 | 0.00000  | 0.06604  | 0.00000  |
| 52 | C4 | S   | 0.00000  | 0.00829  | 0.00000  | -0.37607 | 0.00000  |
| 53 | C4 | PX  | 0.00000  | -0.07542 | 0.00000  | -0.09390 | 0.00000  |
| 54 | C4 | PY  | 0.00000  | 0.21648  | 0.00000  | -0.06018 | 0.00000  |
| 55 | C4 | PZ  | -0.01098 | 0.00000  | -0.01363 | 0.00000  | 0.01775  |
| 56 | C4 | S   | 0.00000  | 0.01155  | 0.00000  | -1.26053 | 0.00000  |
| 57 | C4 | PX  | 0.00000  | -1.91096 | 0.00000  | 1.92200  | 0.00000  |
| 58 | C4 | PY  | 0.00000  | 0.53877  | 0.00000  | -0.71607 | 0.00000  |
| 59 | C4 | PZ  | -0.00781 | 0.00000  | -0.03016 | 0.00000  | -0.04189 |
| 60 | C4 | DXX | 0.00000  | 0.06459  | 0.00000  | -0.34138 | 0.00000  |
| 61 | C4 | DYY | 0.00000  | 0.02657  | 0.00000  | -0.13310 | 0.00000  |
| 62 | C4 | DZZ | 0.00000  | -0.04280 | 0.00000  | 0.55948  | 0.00000  |
| 63 | C4 | DXY | 0.00000  | 0.17933  | 0.00000  | -0.22992 | 0.00000  |
| 64 | C4 | DXZ | -0.08518 | 0.00000  | -0.03129 | 0.00000  | -0.34299 |
| 65 | C4 | DYZ | -0.15302 | 0.00000  | -0.18367 | 0.00000  | 0.28841  |
| 66 | C5 | S   | 0.00000  | 0.02613  | 0.00000  | -0.04418 | 0.00000  |
| 67 | C5 | S   | 0.00000  | 0.14533  | 0.00000  | -0.01070 | 0.00000  |
| 68 | C5 | PX  | 0.00000  | -0.04711 | 0.00000  | 0.15678  | 0.00000  |
| 69 | C5 | PY  | 0.00000  | -0.05078 | 0.00000  | 0.09530  | 0.00000  |
| 70 | C5 | PZ  | 0.03885  | 0.00000  | 0.01496  | 0.00000  | -0.00745 |
| 71 | C5 | S   | 0.00000  | -1.19461 | 0.00000  | 0.09875  | 0.00000  |
| 72 | C5 | PX  | 0.00000  | -1.03628 | 0.00000  | 1.43417  | 0.00000  |
| 73 | C5 | PY  | 0.00000  | -0.66594 | 0.00000  | 1.46117  | 0.00000  |
| 74 | C5 | PZ  | -0.04287 | 0.00000  | 0.02749  | 0.00000  | 0.06639  |
| 75 | C5 | DXX | 0.00000  | 0.01063  | 0.00000  | 0.36470  | 0.00000  |
| 76 | C5 | DYY | 0.00000  | -0.11086 | 0.00000  | -0.09003 | 0.00000  |
| 77 | C5 | DZZ | 0.00000  | 0.15563  | 0.00000  | -0.30433 | 0.00000  |
| 78 | C5 | DXY | 0.00000  | -0.09357 | 0.00000  | 0.21223  | 0.00000  |
| 79 | C5 | DXZ | 0.05174  | 0.00000  | -0.13095 | 0.00000  | -0.26832 |
| 80 | C5 | DYZ | -0.47691 | 0.00000  | 0.03148  | 0.00000  | -0.06755 |
| 81 | C6 | S   | 0.00000  | 0.01507  | 0.00000  | 0.09406  | 0.00000  |
| 82 | C6 | S   | 0.00000  | 0.02100  | 0.00000  | 0.53378  | 0.00000  |
| 83 | C6 | PX  | 0.00000  | 0.03549  | 0.00000  | -0.04604 | 0.00000  |
| 84 | C6 | PY  | 0.00000  | -0.11026 | 0.00000  | -0.04343 | 0.00000  |

|     |    |     |          |          |          |          |          |
|-----|----|-----|----------|----------|----------|----------|----------|
| 85  | C6 | PZ  | 0.03510  | 0.00000  | -0.02517 | 0.00000  | 0.04503  |
| 86  | C6 | S   | 0.00000  | -0.07221 | 0.00000  | -3.87472 | 0.00000  |
| 87  | C6 | PX  | 0.00000  | -0.04491 | 0.00000  | -4.06144 | 0.00000  |
| 88  | C6 | PY  | 0.00000  | -0.27124 | 0.00000  | -1.30567 | 0.00000  |
| 89  | C6 | PZ  | 0.01778  | 0.00000  | 0.03615  | 0.00000  | 0.15046  |
| 90  | C6 | DXX | 0.00000  | 0.03998  | 0.00000  | -0.42004 | 0.00000  |
| 91  | C6 | DYY | 0.00000  | -0.08354 | 0.00000  | -0.08734 | 0.00000  |
| 92  | C6 | DZZ | 0.00000  | 0.07095  | 0.00000  | 0.50689  | 0.00000  |
| 93  | C6 | DXY | 0.00000  | 0.01459  | 0.00000  | 0.05397  | 0.00000  |
| 94  | C6 | DXZ | 0.14014  | 0.00000  | 0.22960  | 0.00000  | 0.19998  |
| 95  | C6 | DYZ | -0.09177 | 0.00000  | 0.07953  | 0.00000  | -0.48265 |
| 96  | C7 | S   | 0.00000  | 0.00770  | 0.00000  | -0.02306 | 0.00000  |
| 97  | C7 | S   | 0.00000  | 0.09074  | 0.00000  | 0.12381  | 0.00000  |
| 98  | C7 | PX  | 0.00000  | -0.07908 | 0.00000  | -0.02505 | 0.00000  |
| 99  | C7 | PY  | 0.00000  | 0.09637  | 0.00000  | 0.08347  | 0.00000  |
| 100 | C7 | PZ  | 0.01581  | 0.00000  | 0.00946  | 0.00000  | 0.00631  |
| 101 | C7 | S   | 0.00000  | -0.34322 | 0.00000  | -0.93374 | 0.00000  |
| 102 | C7 | PX  | 0.00000  | 0.15941  | 0.00000  | 1.47968  | 0.00000  |
| 103 | C7 | PY  | 0.00000  | 0.81974  | 0.00000  | 0.91055  | 0.00000  |
| 104 | C7 | PZ  | 0.00715  | 0.00000  | -0.00084 | 0.00000  | -0.00805 |
| 105 | C7 | DXX | 0.00000  | 0.06292  | 0.00000  | -0.07925 | 0.00000  |
| 106 | C7 | DYY | 0.00000  | -0.04187 | 0.00000  | 0.22083  | 0.00000  |
| 107 | C7 | DZZ | 0.00000  | 0.01274  | 0.00000  | -0.19546 | 0.00000  |
| 108 | C7 | DXY | 0.00000  | -0.03035 | 0.00000  | -0.20135 | 0.00000  |
| 109 | C7 | DXZ | 0.08545  | 0.00000  | 0.02060  | 0.00000  | 0.08527  |
| 110 | C7 | DYZ | 0.21302  | 0.00000  | -0.23470 | 0.00000  | 0.09122  |
| 111 | O1 | S   | 0.00000  | -0.01636 | 0.00000  | -0.01922 | 0.00000  |
| 112 | O1 | S   | 0.00000  | -0.26086 | 0.00000  | -0.47104 | 0.00000  |
| 113 | O1 | PX  | 0.00000  | -0.12488 | 0.00000  | -0.05475 | 0.00000  |
| 114 | O1 | PY  | 0.00000  | -0.05306 | 0.00000  | 0.03378  | 0.00000  |
| 115 | O1 | PZ  | -0.00183 | 0.00000  | 0.00443  | 0.00000  | -0.02918 |
| 116 | O1 | S   | 0.00000  | 0.77164  | 0.00000  | 1.49566  | 0.00000  |
| 117 | O1 | PX  | 0.00000  | 0.78434  | 0.00000  | 0.09720  | 0.00000  |
| 118 | O1 | PY  | 0.00000  | 0.44875  | 0.00000  | -0.76020 | 0.00000  |
| 119 | O1 | PZ  | -0.00286 | 0.00000  | -0.00590 | 0.00000  | 0.08473  |
| 120 | O1 | DXX | 0.00000  | 0.29414  | 0.00000  | -0.01142 | 0.00000  |
| 121 | O1 | DYY | 0.00000  | -0.37513 | 0.00000  | 0.24418  | 0.00000  |
| 122 | O1 | DZZ | 0.00000  | -0.10961 | 0.00000  | -0.27604 | 0.00000  |
| 123 | O1 | DXY | 0.00000  | 0.05906  | 0.00000  | -0.19973 | 0.00000  |
| 124 | O1 | DXZ | -0.08683 | 0.00000  | -0.08852 | 0.00000  | 0.23157  |
| 125 | O1 | DYZ | -0.18102 | 0.00000  | -0.19829 | 0.00000  | 0.29123  |
| 126 | H4 | S   | 0.00000  | 0.02681  | 0.00000  | -0.02515 | 0.00000  |
| 127 | H4 | S   | 0.00000  | -0.00689 | 0.00000  | -0.01673 | 0.00000  |
| 128 | H4 | PX  | 0.00000  | 0.23279  | 0.00000  | -0.11097 | 0.00000  |
| 129 | H4 | PY  | 0.00000  | 0.24320  | 0.00000  | -0.04395 | 0.00000  |
| 130 | H4 | PZ  | 0.35248  | 0.00000  | -0.12281 | 0.00000  | -0.14693 |
| 131 | N1 | S   | 0.00000  | -0.00133 | 0.00000  | 0.01148  | 0.00000  |
| 132 | N1 | S   | 0.00000  | -0.05055 | 0.00000  | 0.15339  | 0.00000  |
| 133 | N1 | PX  | 0.00000  | -0.02529 | 0.00000  | -0.07559 | 0.00000  |
| 134 | N1 | PY  | 0.00000  | 0.06200  | 0.00000  | 0.12618  | 0.00000  |
| 135 | N1 | PZ  | 0.00200  | 0.00000  | -0.00503 | 0.00000  | -0.03656 |
| 136 | N1 | S   | 0.00000  | 0.16185  | 0.00000  | -0.72554 | 0.00000  |
| 137 | N1 | PX  | 0.00000  | 0.25376  | 0.00000  | 0.55895  | 0.00000  |
| 138 | N1 | PY  | 0.00000  | -0.40143 | 0.00000  | -0.51888 | 0.00000  |

|     |     |     |          |          |          |          |          |
|-----|-----|-----|----------|----------|----------|----------|----------|
| 139 | N1  | PZ  | -0.08700 | 0.00000  | -0.10471 | 0.00000  | -0.21285 |
| 140 | N1  | DXX | 0.00000  | 0.10064  | 0.00000  | -0.03995 | 0.00000  |
| 141 | N1  | DYY | 0.00000  | -0.04845 | 0.00000  | 0.01406  | 0.00000  |
| 142 | N1  | DZZ | 0.00000  | -0.02268 | 0.00000  | 0.01759  | 0.00000  |
| 143 | N1  | DXY | 0.00000  | -0.10262 | 0.00000  | 0.19492  | 0.00000  |
| 144 | N1  | DXZ | -0.16035 | 0.00000  | -0.37171 | 0.00000  | -0.22486 |
| 145 | N1  | DYZ | -0.10318 | 0.00000  | 0.20450  | 0.00000  | -0.37625 |
| 146 | H6  | S   | 0.00000  | 0.04632  | 0.00000  | 0.08616  | 0.00000  |
| 147 | H6  | S   | 0.00000  | 0.14018  | 0.00000  | 0.35422  | 0.00000  |
| 148 | H6  | PX  | 0.00000  | 0.10782  | 0.00000  | 0.06740  | 0.00000  |
| 149 | H6  | PY  | 0.00000  | -0.12798 | 0.00000  | -0.07620 | 0.00000  |
| 150 | H6  | PZ  | -0.38872 | 0.00000  | 0.05253  | 0.00000  | 0.30712  |
| 151 | C8  | S   | 0.00000  | -0.02164 | 0.00000  | -0.02474 | 0.00000  |
| 152 | C8  | S   | 0.00000  | -0.21555 | 0.00000  | -0.11740 | 0.00000  |
| 153 | C8  | PX  | 0.00000  | 0.07314  | 0.00000  | 0.02169  | 0.00000  |
| 154 | C8  | PY  | 0.00000  | -0.12389 | 0.00000  | -0.01814 | 0.00000  |
| 155 | C8  | PZ  | -0.04610 | 0.00000  | -0.00050 | 0.00000  | -0.01931 |
| 156 | C8  | S   | 0.00000  | 0.90457  | 0.00000  | 1.09164  | 0.00000  |
| 157 | C8  | PX  | 0.00000  | 0.87397  | 0.00000  | 0.41679  | 0.00000  |
| 158 | C8  | PY  | 0.00000  | 0.45515  | 0.00000  | 0.92350  | 0.00000  |
| 159 | C8  | PZ  | 0.04816  | 0.00000  | 0.05782  | 0.00000  | 0.04928  |
| 160 | C8  | DXX | 0.00000  | -0.02914 | 0.00000  | 0.07594  | 0.00000  |
| 161 | C8  | DYY | 0.00000  | 0.15935  | 0.00000  | 0.04647  | 0.00000  |
| 162 | C8  | DZZ | 0.00000  | -0.14042 | 0.00000  | -0.11470 | 0.00000  |
| 163 | C8  | DXY | 0.00000  | -0.03134 | 0.00000  | -0.15164 | 0.00000  |
| 164 | C8  | DXZ | -0.02039 | 0.00000  | -0.51511 | 0.00000  | -0.07251 |
| 165 | C8  | DYZ | 0.41800  | 0.00000  | 0.11580  | 0.00000  | 0.31202  |
| 166 | H8  | S   | 0.00000  | -0.01623 | 0.00000  | -0.12815 | 0.00000  |
| 167 | H8  | S   | 0.00000  | 0.02811  | 0.00000  | -0.46917 | 0.00000  |
| 168 | H8  | PX  | 0.00000  | -0.04862 | 0.00000  | 0.04954  | 0.00000  |
| 169 | H8  | PY  | 0.00000  | -0.22640 | 0.00000  | 0.04697  | 0.00000  |
| 170 | H8  | PZ  | -0.07447 | 0.00000  | -0.04301 | 0.00000  | -0.06336 |
| 171 | C10 | S   | 0.00000  | 0.00519  | 0.00000  | -0.00074 | 0.00000  |
| 172 | C10 | S   | 0.00000  | -0.01553 | 0.00000  | 0.01076  | 0.00000  |
| 173 | C10 | PX  | 0.00000  | -0.02835 | 0.00000  | -0.07265 | 0.00000  |
| 174 | C10 | PY  | 0.00000  | -0.13020 | 0.00000  | -0.08254 | 0.00000  |
| 175 | C10 | PZ  | 0.03590  | 0.00000  | 0.01700  | 0.00000  | 0.03257  |
| 176 | C10 | S   | 0.00000  | -0.12554 | 0.00000  | 0.28854  | 0.00000  |
| 177 | C10 | PX  | 0.00000  | -0.28942 | 0.00000  | -0.11912 | 0.00000  |
| 178 | C10 | PY  | 0.00000  | -0.17827 | 0.00000  | 0.04894  | 0.00000  |
| 179 | C10 | PZ  | -0.02839 | 0.00000  | -0.02068 | 0.00000  | -0.01013 |
| 180 | C10 | DXX | 0.00000  | 0.02319  | 0.00000  | 0.01361  | 0.00000  |
| 181 | C10 | DYY | 0.00000  | -0.09123 | 0.00000  | -0.04103 | 0.00000  |
| 182 | C10 | DZZ | 0.00000  | 0.05988  | 0.00000  | 0.01021  | 0.00000  |
| 183 | C10 | DXY | 0.00000  | -0.04223 | 0.00000  | -0.07777 | 0.00000  |
| 184 | C10 | DXZ | -0.25251 | 0.00000  | 0.57136  | 0.00000  | -0.07934 |
| 185 | C10 | DYZ | 0.36318  | 0.00000  | 0.31106  | 0.00000  | 0.26569  |
| 186 | H16 | S   | 0.00000  | 0.01623  | 0.00000  | -0.02735 | 0.00000  |
| 187 | H16 | S   | 0.00000  | 0.12995  | 0.00000  | 0.08198  | 0.00000  |
| 188 | H16 | PX  | 0.00000  | 0.01338  | 0.00000  | 0.00248  | 0.00000  |
| 189 | H16 | PY  | 0.00000  | 0.08642  | 0.00000  | 0.10939  | 0.00000  |
| 190 | H16 | PZ  | 0.32310  | 0.00000  | -0.38499 | 0.00000  | 0.12365  |
| 191 | H18 | S   | 0.00000  | -0.00825 | 0.00000  | 0.00264  | 0.00000  |
| 192 | H18 | S   | 0.00000  | -0.15139 | 0.00000  | -0.07729 | 0.00000  |



|     |     |     |          |          |          |          |          |
|-----|-----|-----|----------|----------|----------|----------|----------|
| 193 | H18 | PX  | 0.00000  | -0.07553 | 0.00000  | -0.07565 | 0.00000  |
| 194 | H18 | PY  | 0.00000  | -0.02156 | 0.00000  | -0.05673 | 0.00000  |
| 195 | H18 | PZ  | 0.05405  | 0.00000  | 0.56250  | 0.00000  | 0.09414  |
| 196 | C9  | S   | 0.00000  | 0.00945  | 0.00000  | 0.01074  | 0.00000  |
| 197 | C9  | S   | 0.00000  | 0.01743  | 0.00000  | -0.02689 | 0.00000  |
| 198 | C9  | PX  | 0.00000  | 0.28896  | 0.00000  | 0.02222  | 0.00000  |
| 199 | C9  | PY  | 0.00000  | 0.06940  | 0.00000  | 0.10882  | 0.00000  |
| 200 | C9  | PZ  | 0.06743  | 0.00000  | 0.06276  | 0.00000  | -0.14409 |
| 201 | C9  | S   | 0.00000  | -0.64212 | 0.00000  | -0.23756 | 0.00000  |
| 202 | C9  | PX  | 0.00000  | 0.48525  | 0.00000  | -0.07699 | 0.00000  |
| 203 | C9  | PY  | 0.00000  | 0.75740  | 0.00000  | 0.25224  | 0.00000  |
| 204 | C9  | PZ  | 0.12664  | 0.00000  | 0.14650  | 0.00000  | -0.33854 |
| 205 | C9  | DXX | 0.00000  | 0.13297  | 0.00000  | 0.21363  | 0.00000  |
| 206 | C9  | DYY | 0.00000  | -0.17627 | 0.00000  | -0.07714 | 0.00000  |
| 207 | C9  | DZZ | 0.00000  | -0.02910 | 0.00000  | -0.06668 | 0.00000  |
| 208 | C9  | DXY | 0.00000  | 0.19488  | 0.00000  | -0.19524 | 0.00000  |
| 209 | C9  | DXZ | -0.10720 | 0.00000  | -0.10646 | 0.00000  | 0.17919  |
| 210 | C9  | DYZ | 0.00579  | 0.00000  | -0.00121 | 0.00000  | -0.09657 |
| 211 | H3  | S   | 0.00000  | 0.04195  | 0.00000  | -0.02805 | 0.00000  |
| 212 | H3  | S   | 0.00000  | -0.31088 | 0.00000  | -0.11035 | 0.00000  |
| 213 | H3  | PX  | 0.00000  | -0.37549 | 0.00000  | 0.11509  | 0.00000  |
| 214 | H3  | PY  | 0.00000  | -0.06509 | 0.00000  | 0.10662  | 0.00000  |
| 215 | H3  | PZ  | -0.10582 | 0.00000  | -0.10356 | 0.00000  | 0.30184  |
| 216 | H5  | S   | -0.00499 | 0.10071  | -0.00252 | 0.02830  | -0.00733 |
| 217 | H5  | S   | 0.09514  | -0.00706 | 0.10458  | 0.11632  | -0.22112 |
| 218 | H5  | PX  | -0.10242 | -0.27172 | -0.10129 | -0.07685 | 0.17630  |
| 219 | H5  | PY  | 0.01457  | -0.46724 | 0.01417  | -0.05640 | -0.10423 |
| 220 | H5  | PZ  | 0.00390  | -0.06996 | 0.00290  | -0.00132 | -0.00312 |
| 221 | H7  | S   | 0.00499  | 0.10071  | 0.00252  | 0.02830  | 0.00733  |
| 222 | H7  | S   | -0.09514 | -0.00706 | -0.10458 | 0.11632  | 0.22112  |
| 223 | H7  | PX  | 0.10242  | -0.27172 | 0.10129  | -0.07685 | -0.17630 |
| 224 | H7  | PY  | -0.01457 | -0.46724 | -0.01417 | -0.05640 | 0.10423  |
| 225 | H7  | PZ  | 0.00390  | 0.06996  | 0.00290  | 0.00132  | -0.00312 |

|              |          |          |          |          |          |
|--------------|----------|----------|----------|----------|----------|
| MO:          | 186      | 187      | 188      | 189      | 190      |
| Eigenvalues: | 3.04983  | 3.05511  | 3.06524  | 3.07307  | 3.11348  |
| (ev):        | 82.99007 | 83.13370 | 83.40947 | 83.62244 | 84.72227 |

|    |    |     |          |          |          |          |          |
|----|----|-----|----------|----------|----------|----------|----------|
|    |    | A   | A        | A        | A        | A        |          |
| 1  | H1 | S   | 0.02461  | -0.05763 | 0.02825  | 0.00000  | 0.00000  |
| 2  | H1 | S   | -0.06801 | -0.16967 | 0.04274  | 0.00000  | 0.00000  |
| 3  | H1 | PX  | -0.16996 | -0.04958 | -0.01648 | 0.00000  | 0.00000  |
| 4  | H1 | PY  | 0.37088  | -0.22089 | -0.00725 | 0.00000  | 0.00000  |
| 5  | H1 | PZ  | 0.00000  | 0.00000  | 0.00000  | 0.06853  | -0.37760 |
| 6  | C1 | S   | 0.02807  | 0.02481  | -0.02903 | 0.00000  | 0.00000  |
| 7  | C1 | S   | 0.01190  | 0.05975  | -0.15517 | 0.00000  | 0.00000  |
| 8  | C1 | PX  | 0.08451  | -0.00285 | 0.04147  | 0.00000  | 0.00000  |
| 9  | C1 | PY  | -0.11395 | -0.03502 | -0.12089 | 0.00000  | 0.00000  |
| 10 | C1 | PZ  | 0.00000  | 0.00000  | 0.00000  | -0.00103 | -0.06246 |
| 11 | C1 | S   | -1.66109 | -0.99646 | 1.37446  | 0.00000  | 0.00000  |
| 12 | C1 | PX  | 1.13983  | 0.67624  | -0.60776 | 0.00000  | 0.00000  |
| 13 | C1 | PY  | -1.64554 | 0.47776  | 0.25580  | 0.00000  | 0.00000  |
| 14 | C1 | PZ  | 0.00000  | 0.00000  | 0.00000  | 0.01674  | 0.09695  |
| 15 | C1 | DXX | 0.00777  | -0.05501 | -0.12569 | 0.00000  | 0.00000  |

|    |    |     |          |          |          |          |          |
|----|----|-----|----------|----------|----------|----------|----------|
| 16 | C1 | DYY | -0.24396 | -0.15170 | 0.19792  | 0.00000  | 0.00000  |
| 17 | C1 | DZZ | 0.19377  | 0.15923  | -0.15077 | 0.00000  | 0.00000  |
| 18 | C1 | DXY | 0.02343  | 0.21949  | 0.06493  | 0.00000  | 0.00000  |
| 19 | C1 | DXZ | 0.00000  | 0.00000  | 0.00000  | 0.02759  | 0.46115  |
| 20 | C1 | DYZ | 0.00000  | 0.00000  | 0.00000  | -0.37364 | 0.11814  |
| 21 | C2 | S   | 0.03214  | 0.04401  | -0.00581 | 0.00000  | 0.00000  |
| 22 | C2 | S   | 0.20701  | 0.10292  | 0.06712  | 0.00000  | 0.00000  |
| 23 | C2 | PX  | -0.05991 | 0.01529  | -0.03664 | 0.00000  | 0.00000  |
| 24 | C2 | PY  | 0.01354  | -0.16179 | 0.16649  | 0.00000  | 0.00000  |
| 25 | C2 | PZ  | 0.00000  | 0.00000  | 0.00000  | 0.02534  | 0.04513  |
| 26 | C2 | S   | -1.74125 | -1.98168 | 0.66335  | 0.00000  | 0.00000  |
| 27 | C2 | PX  | -1.39518 | -0.66688 | 0.16521  | 0.00000  | 0.00000  |
| 28 | C2 | PY  | 0.82608  | -0.52744 | 0.33885  | 0.00000  | 0.00000  |
| 29 | C2 | PZ  | 0.00000  | 0.00000  | 0.00000  | -0.02425 | -0.08025 |
| 30 | C2 | DXX | 0.02081  | 0.21234  | 0.06205  | 0.00000  | 0.00000  |
| 31 | C2 | DYY | -0.18808 | -0.50465 | 0.13564  | 0.00000  | 0.00000  |
| 32 | C2 | DZZ | 0.17191  | 0.28298  | -0.07834 | 0.00000  | 0.00000  |
| 33 | C2 | DXY | -0.01117 | -0.14704 | -0.18412 | 0.00000  | 0.00000  |
| 34 | C2 | DXZ | 0.00000  | 0.00000  | 0.00000  | 0.09946  | 0.35805  |
| 35 | C2 | DYZ | 0.00000  | 0.00000  | 0.00000  | 0.25939  | 0.16783  |
| 36 | C3 | S   | -0.00248 | -0.00351 | 0.03346  | 0.00000  | 0.00000  |
| 37 | C3 | S   | 0.04305  | 0.00525  | 0.07911  | 0.00000  | 0.00000  |
| 38 | C3 | PX  | -0.02884 | 0.07070  | 0.02066  | 0.00000  | 0.00000  |
| 39 | C3 | PY  | 0.14112  | -0.10573 | -0.04357 | 0.00000  | 0.00000  |
| 40 | C3 | PZ  | 0.00000  | 0.00000  | 0.00000  | 0.06528  | -0.00518 |
| 41 | C3 | S   | -1.15054 | -0.06232 | -1.13603 | 0.00000  | 0.00000  |
| 42 | C3 | PX  | -1.60069 | -1.22803 | 1.10340  | 0.00000  | 0.00000  |
| 43 | C3 | PY  | 0.28963  | 1.43577  | -0.30214 | 0.00000  | 0.00000  |
| 44 | C3 | PZ  | 0.00000  | 0.00000  | 0.00000  | -0.02165 | -0.10886 |
| 45 | C3 | DXX | 0.08556  | 0.05003  | -0.14114 | 0.00000  | 0.00000  |
| 46 | C3 | DYY | -0.08105 | 0.05493  | -0.06650 | 0.00000  | 0.00000  |
| 47 | C3 | DZZ | -0.01357 | -0.03626 | 0.19326  | 0.00000  | 0.00000  |
| 48 | C3 | DXY | 0.13323  | 0.15912  | -0.18308 | 0.00000  | 0.00000  |
| 49 | C3 | DXZ | 0.00000  | 0.00000  | 0.00000  | -0.08793 | -0.21080 |
| 50 | C3 | DYZ | 0.00000  | 0.00000  | 0.00000  | -0.48933 | 0.33871  |
| 51 | C4 | S   | -0.02370 | 0.03154  | 0.00012  | 0.00000  | 0.00000  |
| 52 | C4 | S   | 0.30033  | -0.03043 | -0.10749 | 0.00000  | 0.00000  |
| 53 | C4 | PX  | 0.09470  | 0.20865  | -0.00775 | 0.00000  | 0.00000  |
| 54 | C4 | PY  | 0.22918  | -0.31733 | -0.06606 | 0.00000  | 0.00000  |
| 55 | C4 | PZ  | 0.00000  | 0.00000  | 0.00000  | 0.01245  | 0.02027  |
| 56 | C4 | S   | 1.34063  | -0.43817 | -0.33023 | 0.00000  | 0.00000  |
| 57 | C4 | PX  | 2.47524  | -0.11155 | -1.15733 | 0.00000  | 0.00000  |
| 58 | C4 | PY  | 0.56022  | -0.25486 | -0.25557 | 0.00000  | 0.00000  |
| 59 | C4 | PZ  | 0.00000  | 0.00000  | 0.00000  | -0.00104 | -0.13115 |
| 60 | C4 | DXX | -0.00802 | 0.21527  | 0.07480  | 0.00000  | 0.00000  |
| 61 | C4 | DYY | 0.20927  | -0.33006 | -0.04783 | 0.00000  | 0.00000  |
| 62 | C4 | DZZ | -0.26419 | 0.23290  | 0.05161  | 0.00000  | 0.00000  |
| 63 | C4 | DXY | -0.32086 | -0.17033 | -0.17252 | 0.00000  | 0.00000  |
| 64 | C4 | DXZ | 0.00000  | 0.00000  | 0.00000  | 0.23896  | 0.06414  |
| 65 | C4 | DYZ | 0.00000  | 0.00000  | 0.00000  | -0.11369 | -0.47366 |
| 66 | C5 | S   | -0.01414 | -0.01792 | 0.02990  | 0.00000  | 0.00000  |
| 67 | C5 | S   | -0.14468 | 0.01344  | 0.14441  | 0.00000  | 0.00000  |
| 68 | C5 | PX  | 0.02340  | -0.09066 | 0.10475  | 0.00000  | 0.00000  |
| 69 | C5 | PY  | -0.13987 | -0.26888 | 0.01418  | 0.00000  | 0.00000  |

|     |    |     |          |          |          |          |          |
|-----|----|-----|----------|----------|----------|----------|----------|
| 70  | C5 | PZ  | 0.00000  | 0.00000  | 0.00000  | -0.01844 | -0.02997 |
| 71  | C5 | S   | 1.61399  | 1.28942  | -1.63740 | 0.00000  | 0.00000  |
| 72  | C5 | PX  | 1.47683  | 0.06075  | -0.41987 | 0.00000  | 0.00000  |
| 73  | C5 | PY  | 0.25788  | -0.92087 | 0.23124  | 0.00000  | 0.00000  |
| 74  | C5 | PZ  | 0.00000  | 0.00000  | 0.00000  | 0.01581  | 0.08693  |
| 75  | C5 | DXX | 0.16883  | 0.10172  | 0.04185  | 0.00000  | 0.00000  |
| 76  | C5 | DYY | -0.00445 | 0.18131  | -0.23411 | 0.00000  | 0.00000  |
| 77  | C5 | DZZ | -0.07381 | -0.16138 | 0.20290  | 0.00000  | 0.00000  |
| 78  | C5 | DXY | -0.01662 | 0.11678  | -0.26150 | 0.00000  | 0.00000  |
| 79  | C5 | DXZ | 0.00000  | 0.00000  | 0.00000  | 0.06570  | -0.19574 |
| 80  | C5 | DYZ | 0.00000  | 0.00000  | 0.00000  | 0.27606  | 0.33410  |
| 81  | C6 | S   | 0.00206  | 0.02740  | -0.03400 | 0.00000  | 0.00000  |
| 82  | C6 | S   | -0.21595 | -0.17599 | 0.09616  | 0.00000  | 0.00000  |
| 83  | C6 | PX  | -0.05536 | -0.02014 | 0.16063  | 0.00000  | 0.00000  |
| 84  | C6 | PY  | 0.05830  | 0.17198  | -0.35123 | 0.00000  | 0.00000  |
| 85  | C6 | PZ  | 0.00000  | 0.00000  | 0.00000  | 0.00722  | 0.01910  |
| 86  | C6 | S   | 0.23245  | -0.41966 | 2.24589  | 0.00000  | 0.00000  |
| 87  | C6 | PX  | -1.72500 | -0.77896 | 0.75456  | 0.00000  | 0.00000  |
| 88  | C6 | PY  | 1.09928  | 0.09430  | -0.39517 | 0.00000  | 0.00000  |
| 89  | C6 | PZ  | 0.00000  | 0.00000  | 0.00000  | 0.05113  | 0.12980  |
| 90  | C6 | DXX | 0.03295  | 0.15193  | 0.06915  | 0.00000  | 0.00000  |
| 91  | C6 | DYY | -0.00623 | -0.27397 | 0.18647  | 0.00000  | 0.00000  |
| 92  | C6 | DZZ | 0.05372  | 0.24359  | -0.29637 | 0.00000  | 0.00000  |
| 93  | C6 | DXY | -0.22948 | -0.20080 | 0.14168  | 0.00000  | 0.00000  |
| 94  | C6 | DXZ | 0.00000  | 0.00000  | 0.00000  | -0.20846 | -0.02731 |
| 95  | C6 | DYZ | 0.00000  | 0.00000  | 0.00000  | -0.10152 | -0.36184 |
| 96  | C7 | S   | -0.04790 | -0.00728 | 0.00321  | 0.00000  | 0.00000  |
| 97  | C7 | S   | -0.22038 | -0.04888 | 0.00320  | 0.00000  | 0.00000  |
| 98  | C7 | PX  | -0.13216 | 0.03676  | 0.04192  | 0.00000  | 0.00000  |
| 99  | C7 | PY  | 0.05248  | -0.02441 | -0.00730 | 0.00000  | 0.00000  |
| 100 | C7 | PZ  | 0.00000  | 0.00000  | 0.00000  | -0.04450 | 0.04515  |
| 101 | C7 | S   | 2.47411  | 1.21218  | -0.31117 | 0.00000  | 0.00000  |
| 102 | C7 | PX  | -1.09525 | -0.61773 | -0.03725 | 0.00000  | 0.00000  |
| 103 | C7 | PY  | 0.39425  | 1.17450  | -0.36658 | 0.00000  | 0.00000  |
| 104 | C7 | PZ  | 0.00000  | 0.00000  | 0.00000  | 0.01284  | 0.03302  |
| 105 | C7 | DXX | 0.02377  | 0.03127  | -0.01691 | 0.00000  | 0.00000  |
| 106 | C7 | DYY | 0.17668  | 0.10485  | 0.01641  | 0.00000  | 0.00000  |
| 107 | C7 | DZZ | -0.24629 | -0.02930 | -0.00290 | 0.00000  | 0.00000  |
| 108 | C7 | DXY | 0.02474  | 0.26707  | -0.04477 | 0.00000  | 0.00000  |
| 109 | C7 | DXZ | 0.00000  | 0.00000  | 0.00000  | 0.63885  | -0.24954 |
| 110 | C7 | DYZ | 0.00000  | 0.00000  | 0.00000  | -0.06660 | 0.25577  |
| 111 | O1 | S   | 0.01172  | -0.03303 | -0.03840 | 0.00000  | 0.00000  |
| 112 | O1 | S   | 0.33916  | -0.23000 | -0.43793 | 0.00000  | 0.00000  |
| 113 | O1 | PX  | 0.01398  | 0.04074  | -0.00709 | 0.00000  | 0.00000  |
| 114 | O1 | PY  | 0.02300  | -0.09240 | 0.01231  | 0.00000  | 0.00000  |
| 115 | O1 | PZ  | 0.00000  | 0.00000  | 0.00000  | 0.01683  | 0.00340  |
| 116 | O1 | S   | -1.08795 | 0.99106  | 1.48115  | 0.00000  | 0.00000  |
| 117 | O1 | PX  | 0.05752  | 0.04177  | 0.89276  | 0.00000  | 0.00000  |
| 118 | O1 | PY  | 0.72743  | -0.30972 | 0.07079  | 0.00000  | 0.00000  |
| 119 | O1 | PZ  | 0.00000  | 0.00000  | 0.00000  | -0.03607 | 0.09853  |
| 120 | O1 | DXX | 0.35148  | -0.06230 | 0.39229  | 0.00000  | 0.00000  |
| 121 | O1 | DYY | -0.40844 | 0.23941  | -0.04378 | 0.00000  | 0.00000  |
| 122 | O1 | DZZ | 0.09456  | -0.25540 | -0.44027 | 0.00000  | 0.00000  |
| 123 | O1 | DXY | -0.02159 | 0.14689  | 0.22658  | 0.00000  | 0.00000  |

|     |     |     |          |          |          |          |          |
|-----|-----|-----|----------|----------|----------|----------|----------|
| 124 | O1  | DXZ | 0.00000  | 0.00000  | 0.00000  | -0.07896 | -0.07438 |
| 125 | O1  | DYZ | 0.00000  | 0.00000  | 0.00000  | -0.09081 | -0.35774 |
| 126 | H4  | S   | 0.00217  | 0.01961  | -0.01157 | 0.00000  | 0.00000  |
| 127 | H4  | S   | 0.24148  | 0.17228  | 0.06761  | 0.00000  | 0.00000  |
| 128 | H4  | PX  | 0.05666  | 0.16967  | 0.18728  | 0.00000  | 0.00000  |
| 129 | H4  | PY  | -0.03329 | 0.17368  | 0.03567  | 0.00000  | 0.00000  |
| 130 | H4  | PZ  | 0.00000  | 0.00000  | 0.00000  | -0.12174 | -0.31742 |
| 131 | N1  | S   | -0.02287 | -0.04662 | 0.04143  | 0.00000  | 0.00000  |
| 132 | N1  | S   | -0.31827 | -0.33974 | 0.39955  | 0.00000  | 0.00000  |
| 133 | N1  | PX  | 0.03899  | 0.07379  | -0.00515 | 0.00000  | 0.00000  |
| 134 | N1  | PY  | 0.02596  | 0.17500  | -0.13874 | 0.00000  | 0.00000  |
| 135 | N1  | PZ  | 0.00000  | 0.00000  | 0.00000  | -0.01430 | -0.02621 |
| 136 | N1  | S   | 1.68648  | 2.23953  | -2.24460 | 0.00000  | 0.00000  |
| 137 | N1  | PX  | 0.82885  | 1.19929  | -0.74519 | 0.00000  | 0.00000  |
| 138 | N1  | PY  | 0.08233  | -0.38114 | -0.47734 | 0.00000  | 0.00000  |
| 139 | N1  | PZ  | 0.00000  | 0.00000  | 0.00000  | -0.06192 | -0.10480 |
| 140 | N1  | DXX | 0.23408  | 0.28413  | -0.06230 | 0.00000  | 0.00000  |
| 141 | N1  | DYY | 0.03386  | 0.17584  | -0.32902 | 0.00000  | 0.00000  |
| 142 | N1  | DZZ | -0.19472 | -0.37005 | 0.34430  | 0.00000  | 0.00000  |
| 143 | N1  | DXY | -0.08055 | -0.33816 | -0.07540 | 0.00000  | 0.00000  |
| 144 | N1  | DXZ | 0.00000  | 0.00000  | 0.00000  | -0.04851 | 0.03269  |
| 145 | N1  | DYZ | 0.00000  | 0.00000  | 0.00000  | -0.14489 | -0.29961 |
| 146 | H6  | S   | -0.05917 | -0.02137 | 0.01090  | 0.00000  | 0.00000  |
| 147 | H6  | S   | -0.25836 | -0.08523 | -0.02263 | 0.00000  | 0.00000  |
| 148 | H6  | PX  | 0.03664  | 0.13473  | -0.02563 | 0.00000  | 0.00000  |
| 149 | H6  | PY  | -0.25357 | -0.15982 | -0.29716 | 0.00000  | 0.00000  |
| 150 | H6  | PZ  | 0.00000  | 0.00000  | 0.00000  | 0.14144  | 0.31971  |
| 151 | C8  | S   | 0.06846  | 0.03396  | -0.05097 | 0.00000  | 0.00000  |
| 152 | C8  | S   | -0.05560 | -0.36532 | 0.09592  | 0.00000  | 0.00000  |
| 153 | C8  | PX  | 0.08569  | 0.14607  | -0.07326 | 0.00000  | 0.00000  |
| 154 | C8  | PY  | 0.00204  | -0.17143 | -0.00001 | 0.00000  | 0.00000  |
| 155 | C8  | PZ  | 0.00000  | 0.00000  | 0.00000  | -0.01565 | -0.00518 |
| 156 | C8  | S   | -2.91273 | -0.94441 | 1.98405  | 0.00000  | 0.00000  |
| 157 | C8  | PX  | -0.01211 | 1.62555  | -0.45817 | 0.00000  | 0.00000  |
| 158 | C8  | PY  | 0.11526  | -0.21848 | -0.81615 | 0.00000  | 0.00000  |
| 159 | C8  | PZ  | 0.00000  | 0.00000  | 0.00000  | -0.01442 | 0.01630  |
| 160 | C8  | DXX | -0.05445 | -0.40432 | -0.07811 | 0.00000  | 0.00000  |
| 161 | C8  | DYY | -0.29640 | 0.18325  | 0.24622  | 0.00000  | 0.00000  |
| 162 | C8  | DZZ | 0.48744  | 0.29165  | -0.37200 | 0.00000  | 0.00000  |
| 163 | C8  | DXY | 0.11011  | 0.04530  | -0.19987 | 0.00000  | 0.00000  |
| 164 | C8  | DXZ | 0.00000  | 0.00000  | 0.00000  | 0.03313  | 0.11228  |
| 165 | C8  | DYZ | 0.00000  | 0.00000  | 0.00000  | 0.45204  | -0.04023 |
| 166 | H8  | S   | 0.03727  | 0.02876  | 0.00501  | 0.00000  | 0.00000  |
| 167 | H8  | S   | 0.24040  | 0.11051  | 0.03140  | 0.00000  | 0.00000  |
| 168 | H8  | PX  | -0.10473 | 0.09970  | 0.03579  | 0.00000  | 0.00000  |
| 169 | H8  | PY  | -0.00670 | -0.37004 | 0.08641  | 0.00000  | 0.00000  |
| 170 | H8  | PZ  | 0.00000  | 0.00000  | 0.00000  | -0.50780 | 0.17888  |
| 171 | C10 | S   | -0.02080 | -0.01092 | 0.01616  | 0.00000  | 0.00000  |
| 172 | C10 | S   | -0.04683 | -0.01498 | 0.07040  | 0.00000  | 0.00000  |
| 173 | C10 | PX  | -0.06770 | -0.00780 | 0.03950  | 0.00000  | 0.00000  |
| 174 | C10 | PY  | 0.30477  | -0.02708 | -0.27800 | 0.00000  | 0.00000  |
| 175 | C10 | PZ  | 0.00000  | 0.00000  | 0.00000  | 0.05310  | -0.00780 |
| 176 | C10 | S   | 1.14471  | -0.03790 | -1.26441 | 0.00000  | 0.00000  |
| 177 | C10 | PX  | -0.01293 | -0.34999 | 0.36164  | 0.00000  | 0.00000  |

|     |     |     |          |          |          |          |          |
|-----|-----|-----|----------|----------|----------|----------|----------|
| 178 | C10 | PY  | 0.74790  | -0.12700 | -0.79892 | 0.00000  | 0.00000  |
| 179 | C10 | PZ  | 0.00000  | 0.00000  | 0.00000  | 0.01121  | -0.00570 |
| 180 | C10 | DXX | 0.00735  | -0.10477 | -0.08644 | 0.00000  | 0.00000  |
| 181 | C10 | DYY | 0.14041  | 0.05286  | -0.06911 | 0.00000  | 0.00000  |
| 182 | C10 | DZZ | -0.16306 | -0.06008 | 0.13172  | 0.00000  | 0.00000  |
| 183 | C10 | DXY | -0.00634 | -0.01294 | -0.04917 | 0.00000  | 0.00000  |
| 184 | C10 | DXZ | 0.00000  | 0.00000  | 0.00000  | -0.18740 | -0.06045 |
| 185 | C10 | DYZ | 0.00000  | 0.00000  | 0.00000  | 0.32647  | -0.06093 |
| 186 | H16 | S   | -0.04883 | 0.04509  | 0.01668  | 0.00000  | 0.00000  |
| 187 | H16 | S   | 0.03600  | 0.08121  | -0.18026 | 0.00000  | 0.00000  |
| 188 | H16 | PX  | -0.14986 | -0.00179 | 0.16521  | 0.00000  | 0.00000  |
| 189 | H16 | PY  | -0.16523 | 0.03198  | 0.25704  | 0.00000  | 0.00000  |
| 190 | H16 | PZ  | 0.00000  | 0.00000  | 0.00000  | 0.20033  | 0.03315  |
| 191 | H18 | S   | -0.02203 | -0.02373 | 0.09250  | 0.00000  | 0.00000  |
| 192 | H18 | S   | 0.17531  | -0.10743 | -0.13803 | 0.00000  | 0.00000  |
| 193 | H18 | PX  | 0.19158  | -0.07516 | -0.21730 | 0.00000  | 0.00000  |
| 194 | H18 | PY  | -0.03771 | 0.14229  | 0.06485  | 0.00000  | 0.00000  |
| 195 | H18 | PZ  | 0.00000  | 0.00000  | 0.00000  | 0.03943  | -0.06020 |
| 196 | C9  | S   | 0.01651  | 0.01599  | 0.03379  | 0.00000  | 0.00000  |
| 197 | C9  | S   | 0.01946  | -0.09438 | -0.36275 | 0.00000  | 0.00000  |
| 198 | C9  | PX  | -0.02835 | 0.08498  | 0.34259  | 0.00000  | 0.00000  |
| 199 | C9  | PY  | 0.03935  | 0.06692  | 0.21129  | 0.00000  | 0.00000  |
| 200 | C9  | PZ  | 0.00000  | 0.00000  | 0.00000  | 0.05065  | 0.10837  |
| 201 | C9  | S   | -0.44751 | -0.23999 | -0.87462 | 0.00000  | 0.00000  |
| 202 | C9  | PX  | -0.06127 | 0.06635  | 0.10983  | 0.00000  | 0.00000  |
| 203 | C9  | PY  | 0.44322  | -0.21460 | 0.05813  | 0.00000  | 0.00000  |
| 204 | C9  | PZ  | 0.00000  | 0.00000  | 0.00000  | 0.14492  | 0.13979  |
| 205 | C9  | DXX | -0.26155 | -0.01188 | -0.41210 | 0.00000  | 0.00000  |
| 206 | C9  | DYY | -0.16181 | 0.13726  | 0.07421  | 0.00000  | 0.00000  |
| 207 | C9  | DZZ | 0.33374  | -0.05633 | 0.37831  | 0.00000  | 0.00000  |
| 208 | C9  | DXY | 0.01530  | -0.26328 | -0.35548 | 0.00000  | 0.00000  |
| 209 | C9  | DXZ | 0.00000  | 0.00000  | 0.00000  | -0.04265 | -0.05065 |
| 210 | C9  | DYZ | 0.00000  | 0.00000  | 0.00000  | 0.08725  | 0.07175  |
| 211 | H3  | S   | 0.03040  | -0.01525 | 0.01902  | 0.00000  | 0.00000  |
| 212 | H3  | S   | -0.22456 | 0.18883  | 0.11626  | 0.00000  | 0.00000  |
| 213 | H3  | PX  | 0.04827  | 0.14965  | 0.19920  | 0.00000  | 0.00000  |
| 214 | H3  | PY  | -0.02709 | 0.04293  | -0.00967 | 0.00000  | 0.00000  |
| 215 | H3  | PZ  | 0.00000  | 0.00000  | 0.00000  | -0.15009 | -0.15462 |
| 216 | H5  | S   | 0.04124  | -0.01249 | 0.00129  | 0.00484  | 0.01741  |
| 217 | H5  | S   | 0.15965  | 0.00315  | 0.17074  | 0.09152  | 0.11078  |
| 218 | H5  | PX  | 0.20780  | -0.05310 | 0.16102  | -0.04907 | -0.10140 |
| 219 | H5  | PY  | -0.18707 | 0.23856  | 0.06481  | 0.06950  | 0.06901  |
| 220 | H5  | PZ  | 0.31495  | -0.08472 | 0.17628  | -0.00137 | 0.03463  |
| 221 | H7  | S   | 0.04124  | -0.01249 | 0.00129  | -0.00484 | -0.01741 |
| 222 | H7  | S   | 0.15965  | 0.00315  | 0.17074  | -0.09152 | -0.11078 |
| 223 | H7  | PX  | 0.20780  | -0.05310 | 0.16102  | 0.04907  | 0.10140  |
| 224 | H7  | PY  | -0.18707 | 0.23856  | 0.06481  | -0.06950 | -0.06901 |
| 225 | H7  | PZ  | -0.31495 | 0.08472  | -0.17628 | -0.00137 | 0.03463  |

|              |          |          |          |          |          |
|--------------|----------|----------|----------|----------|----------|
| MO:          | 191      | 192      | 193      | 194      | 195      |
| Eigenvalues: | 3.13185  | 3.15634  | 3.19293  | 3.20217  | 3.25015  |
| (ev):        | 85.22204 | 85.88837 | 86.88420 | 87.13548 | 88.44107 |

A

A

A

A

A

|    |    |     |          |          |          |          |          |
|----|----|-----|----------|----------|----------|----------|----------|
| 1  | H1 | S   | -0.00388 | 0.03913  | 0.04692  | 0.00000  | 0.03307  |
| 2  | H1 | S   | 0.00207  | 0.00954  | 0.25529  | 0.00000  | 0.06769  |
| 3  | H1 | PX  | -0.14110 | -0.18187 | -0.03400 | 0.00000  | 0.01418  |
| 4  | H1 | PY  | 0.15532  | 0.19337  | 0.17907  | 0.00000  | -0.34834 |
| 5  | H1 | PZ  | 0.00000  | 0.00000  | 0.00000  | -0.05135 | 0.00000  |
| 6  | C1 | S   | -0.03690 | 0.03761  | -0.08698 | 0.00000  | -0.00627 |
| 7  | C1 | S   | -0.03078 | 0.10998  | -0.34813 | 0.00000  | -0.13811 |
| 8  | C1 | PX  | -0.10937 | 0.01718  | -0.06223 | 0.00000  | -0.06394 |
| 9  | C1 | PY  | -0.15204 | -0.06112 | -0.01923 | 0.00000  | 0.06334  |
| 10 | C1 | PZ  | 0.00000  | 0.00000  | 0.00000  | -0.03358 | 0.00000  |
| 11 | C1 | S   | 1.51080  | -2.73604 | 3.31032  | 0.00000  | -0.00980 |
| 12 | C1 | PX  | -0.10765 | 1.01229  | -1.54630 | 0.00000  | -0.31360 |
| 13 | C1 | PY  | -0.75837 | -0.84329 | -0.58870 | 0.00000  | 0.54341  |
| 14 | C1 | PZ  | 0.00000  | 0.00000  | 0.00000  | 0.01530  | 0.00000  |
| 15 | C1 | DXX | 0.02943  | 0.05594  | -0.01489 | 0.00000  | -0.20744 |
| 16 | C1 | DYY | 0.11487  | -0.32986 | 0.44296  | 0.00000  | 0.23484  |
| 17 | C1 | DZZ | -0.19326 | 0.23169  | -0.47632 | 0.00000  | -0.04132 |
| 18 | C1 | DXY | -0.03671 | 0.03988  | -0.24940 | 0.00000  | 0.23042  |
| 19 | C1 | DXZ | 0.00000  | 0.00000  | 0.00000  | 0.10725  | 0.00000  |
| 20 | C1 | DYZ | 0.00000  | 0.00000  | 0.00000  | -0.08920 | 0.00000  |
| 21 | C2 | S   | 0.00039  | 0.09448  | -0.03057 | 0.00000  | 0.02582  |
| 22 | C2 | S   | -0.08404 | 0.22033  | -0.02988 | 0.00000  | 0.23508  |
| 23 | C2 | PX  | 0.05929  | -0.13713 | -0.10814 | 0.00000  | -0.01324 |
| 24 | C2 | PY  | 0.15395  | -0.09499 | 0.01294  | 0.00000  | -0.26541 |
| 25 | C2 | PZ  | 0.00000  | 0.00000  | 0.00000  | 0.00840  | 0.00000  |
| 26 | C2 | S   | 0.43055  | -3.39969 | 1.24342  | 0.00000  | -1.61824 |
| 27 | C2 | PX  | 0.76053  | -1.97480 | 0.18487  | 0.00000  | -0.77992 |
| 28 | C2 | PY  | 0.33434  | 0.49419  | -1.51763 | 0.00000  | -0.89103 |
| 29 | C2 | PZ  | 0.00000  | 0.00000  | 0.00000  | 0.01577  | 0.00000  |
| 30 | C2 | DXX | 0.05898  | 0.02255  | 0.03626  | 0.00000  | 0.08559  |
| 31 | C2 | DYY | 0.03955  | -0.55076 | 0.13760  | 0.00000  | -0.20730 |
| 32 | C2 | DZZ | -0.00915 | 0.55711  | -0.19932 | 0.00000  | 0.14242  |
| 33 | C2 | DXY | 0.00790  | 0.15546  | -0.15383 | 0.00000  | -0.02237 |
| 34 | C2 | DXZ | 0.00000  | 0.00000  | 0.00000  | -0.00083 | 0.00000  |
| 35 | C2 | DYZ | 0.00000  | 0.00000  | 0.00000  | 0.06571  | 0.00000  |
| 36 | C3 | S   | 0.02291  | 0.01438  | 0.13139  | 0.00000  | 0.05019  |
| 37 | C3 | S   | 0.04951  | 0.08924  | 0.57733  | 0.00000  | 0.13397  |
| 38 | C3 | PX  | 0.09938  | 0.00940  | -0.11402 | 0.00000  | -0.05314 |
| 39 | C3 | PY  | -0.08171 | 0.20705  | 0.05184  | 0.00000  | -0.11192 |
| 40 | C3 | PZ  | 0.00000  | 0.00000  | 0.00000  | 0.00640  | 0.00000  |
| 41 | C3 | S   | -0.11655 | -1.29324 | -8.82005 | 0.00000  | -3.21012 |
| 42 | C3 | PX  | -0.60884 | -0.07866 | 1.31677  | 0.00000  | 0.05385  |
| 43 | C3 | PY  | -1.37014 | 1.12372  | 1.68518  | 0.00000  | 2.57296  |
| 44 | C3 | PZ  | 0.00000  | 0.00000  | 0.00000  | -0.02917 | 0.00000  |
| 45 | C3 | DXX | 0.32958  | -0.09774 | -0.34130 | 0.00000  | -0.21488 |
| 46 | C3 | DYY | -0.33329 | 0.01131  | -0.35561 | 0.00000  | -0.05214 |
| 47 | C3 | DZZ | 0.11216  | 0.08977  | 0.67138  | 0.00000  | 0.26043  |
| 48 | C3 | DXY | -0.24497 | 0.13861  | -0.11819 | 0.00000  | 0.39007  |
| 49 | C3 | DXZ | 0.00000  | 0.00000  | 0.00000  | -0.04004 | 0.00000  |
| 50 | C3 | DYZ | 0.00000  | 0.00000  | 0.00000  | -0.03523 | 0.00000  |
| 51 | C4 | S   | -0.00432 | -0.01886 | 0.00668  | 0.00000  | 0.05101  |
| 52 | C4 | S   | -0.19448 | -0.06421 | 0.01032  | 0.00000  | 0.05557  |
| 53 | C4 | PX  | -0.05319 | 0.09037  | -0.27980 | 0.00000  | 0.14857  |
| 54 | C4 | PY  | -0.04126 | 0.01487  | 0.00573  | 0.00000  | -0.15596 |

|     |    |     |          |          |          |          |          |
|-----|----|-----|----------|----------|----------|----------|----------|
| 55  | C4 | PZ  | 0.00000  | 0.00000  | 0.00000  | -0.00523 | 0.00000  |
| 56  | C4 | S   | 0.61891  | 0.72569  | -1.42566 | 0.00000  | -1.83065 |
| 57  | C4 | PX  | -0.78105 | 2.18853  | -1.11977 | 0.00000  | 0.07674  |
| 58  | C4 | PY  | -0.45863 | -0.59287 | 0.85108  | 0.00000  | 0.64301  |
| 59  | C4 | PZ  | 0.00000  | 0.00000  | 0.00000  | 0.04221  | 0.00000  |
| 60  | C4 | DXX | 0.27679  | 0.20268  | -0.05528 | 0.00000  | -0.24118 |
| 61  | C4 | DYY | -0.31740 | -0.07163 | -0.15893 | 0.00000  | 0.16551  |
| 62  | C4 | DZZ | 0.04690  | -0.16499 | 0.08201  | 0.00000  | 0.27032  |
| 63  | C4 | DXY | 0.10265  | -0.13637 | 0.06686  | 0.00000  | -0.07143 |
| 64  | C4 | DXZ | 0.00000  | 0.00000  | 0.00000  | 0.15623  | 0.00000  |
| 65  | C4 | DYZ | 0.00000  | 0.00000  | 0.00000  | -0.08699 | 0.00000  |
| 66  | C5 | S   | 0.02907  | -0.03246 | 0.02410  | 0.00000  | -0.05224 |
| 67  | C5 | S   | 0.04984  | -0.17407 | 0.09967  | 0.00000  | -0.00223 |
| 68  | C5 | PX  | -0.03317 | -0.15093 | 0.10367  | 0.00000  | 0.00614  |
| 69  | C5 | PY  | 0.01704  | -0.36263 | -0.03067 | 0.00000  | -0.02788 |
| 70  | C5 | PZ  | 0.00000  | 0.00000  | 0.00000  | 0.01009  | 0.00000  |
| 71  | C5 | S   | -1.48760 | 2.51261  | 0.05863  | 0.00000  | 2.38702  |
| 72  | C5 | PX  | -0.77748 | 1.34061  | -0.63073 | 0.00000  | 0.49051  |
| 73  | C5 | PY  | 0.13589  | -0.36389 | -0.46177 | 0.00000  | -0.99937 |
| 74  | C5 | PZ  | 0.00000  | 0.00000  | 0.00000  | -0.03072 | 0.00000  |
| 75  | C5 | DXX | 0.01863  | -0.02972 | -0.17731 | 0.00000  | 0.07783  |
| 76  | C5 | DYY | -0.18583 | 0.31373  | 0.02350  | 0.00000  | 0.19577  |
| 77  | C5 | DZZ | 0.16150  | -0.21156 | 0.16846  | 0.00000  | -0.28651 |
| 78  | C5 | DXY | -0.12683 | 0.19478  | -0.12767 | 0.00000  | 0.20624  |
| 79  | C5 | DXZ | 0.00000  | 0.00000  | 0.00000  | 0.05420  | 0.00000  |
| 80  | C5 | DYZ | 0.00000  | 0.00000  | 0.00000  | 0.07234  | 0.00000  |
| 81  | C6 | S   | 0.01117  | -0.07728 | -0.04558 | 0.00000  | -0.02570 |
| 82  | C6 | S   | 0.23309  | 0.29062  | -0.43326 | 0.00000  | 0.12204  |
| 83  | C6 | PX  | -0.03910 | -0.11605 | 0.16041  | 0.00000  | -0.05751 |
| 84  | C6 | PY  | -0.18803 | -0.40532 | 0.01757  | 0.00000  | -0.27679 |
| 85  | C6 | PZ  | 0.00000  | 0.00000  | 0.00000  | 0.00040  | 0.00000  |
| 86  | C6 | S   | -0.42369 | 4.74689  | 2.08432  | 0.00000  | 2.48750  |
| 87  | C6 | PX  | -0.66173 | -1.02418 | 3.65630  | 0.00000  | 0.74553  |
| 88  | C6 | PY  | -0.73060 | -0.02007 | 0.17558  | 0.00000  | -0.68726 |
| 89  | C6 | PZ  | 0.00000  | 0.00000  | 0.00000  | 0.00378  | 0.00000  |
| 90  | C6 | DXX | 0.03247  | 0.10177  | 0.21641  | 0.00000  | -0.15013 |
| 91  | C6 | DYY | -0.00304 | 0.37714  | 0.11261  | 0.00000  | 0.39838  |
| 92  | C6 | DZZ | -0.04767 | -0.60063 | -0.19257 | 0.00000  | -0.21683 |
| 93  | C6 | DXY | 0.04089  | -0.27754 | 0.16924  | 0.00000  | 0.39661  |
| 94  | C6 | DXZ | 0.00000  | 0.00000  | 0.00000  | -0.03782 | 0.00000  |
| 95  | C6 | DYZ | 0.00000  | 0.00000  | 0.00000  | -0.00046 | 0.00000  |
| 96  | C7 | S   | 0.01344  | -0.03386 | -0.07912 | 0.00000  | -0.05479 |
| 97  | C7 | S   | -0.07392 | -0.09889 | -0.57189 | 0.00000  | -0.21680 |
| 98  | C7 | PX  | -0.21171 | -0.09583 | -0.17138 | 0.00000  | -0.10761 |
| 99  | C7 | PY  | -0.02236 | 0.13480  | 0.09364  | 0.00000  | 0.10887  |
| 100 | C7 | PZ  | 0.00000  | 0.00000  | 0.00000  | -0.00189 | 0.00000  |
| 101 | C7 | S   | -1.03979 | 2.12009  | 5.92529  | 0.00000  | 4.00236  |
| 102 | C7 | PX  | 0.66763  | -1.14026 | -3.37981 | 0.00000  | -1.97237 |
| 103 | C7 | PY  | 0.10793  | -0.24080 | 0.47090  | 0.00000  | 0.49776  |
| 104 | C7 | PZ  | 0.00000  | 0.00000  | 0.00000  | 0.01420  | 0.00000  |
| 105 | C7 | DXX | 0.06324  | 0.00636  | -0.00870 | 0.00000  | 0.07493  |
| 106 | C7 | DYY | -0.31107 | 0.15053  | 0.47244  | 0.00000  | 0.35446  |
| 107 | C7 | DZZ | 0.10165  | -0.17200 | -0.41696 | 0.00000  | -0.30193 |
| 108 | C7 | DXY | 0.04772  | -0.08302 | -0.02145 | 0.00000  | 0.19249  |

|     |    |     |          |          |          |          |          |
|-----|----|-----|----------|----------|----------|----------|----------|
| 109 | C7 | DXZ | 0.00000  | 0.00000  | 0.00000  | 0.02202  | 0.00000  |
| 110 | C7 | DYZ | 0.00000  | 0.00000  | 0.00000  | 0.01265  | 0.00000  |
| 111 | O1 | S   | -0.02014 | 0.02504  | 0.01349  | 0.00000  | -0.01607 |
| 112 | O1 | S   | -0.19444 | 0.20171  | 0.07105  | 0.00000  | -0.14971 |
| 113 | O1 | PX  | -0.00072 | 0.04992  | -0.03710 | 0.00000  | 0.02115  |
| 114 | O1 | PY  | -0.07576 | -0.02794 | -0.00015 | 0.00000  | 0.05375  |
| 115 | O1 | PZ  | 0.00000  | 0.00000  | 0.00000  | -0.01339 | 0.00000  |
| 116 | O1 | S   | 0.69308  | -0.59793 | -0.50529 | 0.00000  | 0.45838  |
| 117 | O1 | PX  | 0.22000  | -0.75861 | -0.10516 | 0.00000  | 0.02097  |
| 118 | O1 | PY  | -0.12767 | -0.21932 | -0.36132 | 0.00000  | -0.13902 |
| 119 | O1 | PZ  | 0.00000  | 0.00000  | 0.00000  | -0.08233 | 0.00000  |
| 120 | O1 | DXX | 0.07799  | -0.18502 | -0.16952 | 0.00000  | -0.05687 |
| 121 | O1 | DYY | 0.09928  | 0.03027  | 0.19700  | 0.00000  | 0.08571  |
| 122 | O1 | DZZ | -0.18761 | 0.29772  | 0.04886  | 0.00000  | -0.15509 |
| 123 | O1 | DXY | 0.15011  | -0.17585 | -0.31991 | 0.00000  | 0.09372  |
| 124 | O1 | DXZ | 0.00000  | 0.00000  | 0.00000  | -0.36682 | 0.00000  |
| 125 | O1 | DYZ | 0.00000  | 0.00000  | 0.00000  | -0.09993 | 0.00000  |
| 126 | H4 | S   | 0.00003  | 0.06310  | -0.00101 | 0.00000  | -0.01962 |
| 127 | H4 | S   | -0.08620 | 0.23816  | -0.01676 | 0.00000  | 0.12695  |
| 128 | H4 | PX  | 0.19380  | 0.04529  | -0.02061 | 0.00000  | -0.10347 |
| 129 | H4 | PY  | 0.10958  | -0.04540 | -0.13727 | 0.00000  | 0.10915  |
| 130 | H4 | PZ  | 0.00000  | 0.00000  | 0.00000  | -0.00075 | 0.00000  |
| 131 | N1 | S   | 0.02647  | 0.05978  | -0.02313 | 0.00000  | 0.02624  |
| 132 | N1 | S   | 0.21536  | 0.65613  | -0.35731 | 0.00000  | 0.12988  |
| 133 | N1 | PX  | -0.06485 | -0.08086 | 0.16027  | 0.00000  | -0.05073 |
| 134 | N1 | PY  | 0.01290  | -0.16659 | -0.19146 | 0.00000  | -0.24117 |
| 135 | N1 | PZ  | 0.00000  | 0.00000  | 0.00000  | -0.00038 | 0.00000  |
| 136 | N1 | S   | -1.21382 | -3.41394 | 1.61447  | 0.00000  | -1.46792 |
| 137 | N1 | PX  | -0.04434 | -0.47269 | 0.14307  | 0.00000  | 0.01162  |
| 138 | N1 | PY  | -0.51652 | -1.12161 | 0.38847  | 0.00000  | -0.60494 |
| 139 | N1 | PZ  | 0.00000  | 0.00000  | 0.00000  | 0.00095  | 0.00000  |
| 140 | N1 | DXX | 0.10840  | -0.00002 | 0.33792  | 0.00000  | 0.15432  |
| 141 | N1 | DYY | -0.28201 | -0.62860 | -0.09450 | 0.00000  | -0.47617 |
| 142 | N1 | DZZ | 0.18736  | 0.50604  | -0.15834 | 0.00000  | 0.19281  |
| 143 | N1 | DXY | 0.18928  | -0.01198 | -0.30195 | 0.00000  | 0.21248  |
| 144 | N1 | DXZ | 0.00000  | 0.00000  | 0.00000  | 0.01398  | 0.00000  |
| 145 | N1 | DYZ | 0.00000  | 0.00000  | 0.00000  | -0.00843 | 0.00000  |
| 146 | H6 | S   | 0.09882  | -0.02019 | -0.17662 | 0.00000  | -0.09417 |
| 147 | H6 | S   | 0.30894  | -0.36644 | -0.23144 | 0.00000  | -0.28122 |
| 148 | H6 | PX  | 0.10378  | 0.06821  | -0.17022 | 0.00000  | -0.16864 |
| 149 | H6 | PY  | -0.00769 | -0.13464 | -0.05876 | 0.00000  | 0.06477  |
| 150 | H6 | PZ  | 0.00000  | 0.00000  | 0.00000  | 0.00457  | 0.00000  |
| 151 | C8 | S   | 0.01112  | -0.02310 | 0.07735  | 0.00000  | 0.01954  |
| 152 | C8 | S   | 0.09353  | 0.19628  | 0.14078  | 0.00000  | 0.21059  |
| 153 | C8 | PX  | 0.00807  | -0.13640 | 0.04943  | 0.00000  | -0.10708 |
| 154 | C8 | PY  | -0.10461 | 0.11813  | 0.00398  | 0.00000  | -0.26582 |
| 155 | C8 | PZ  | 0.00000  | 0.00000  | 0.00000  | -0.00082 | 0.00000  |
| 156 | C8 | S   | -0.32107 | 0.28527  | -3.17514 | 0.00000  | -1.51075 |
| 157 | C8 | PX  | -0.04975 | -1.14106 | -0.20840 | 0.00000  | -0.64014 |
| 158 | C8 | PY  | 1.04011  | -0.63971 | -3.22424 | 0.00000  | -0.95155 |
| 159 | C8 | PZ  | 0.00000  | 0.00000  | 0.00000  | -0.00328 | 0.00000  |
| 160 | C8 | DXX | 0.34673  | 0.06214  | -0.37615 | 0.00000  | 0.03160  |
| 161 | C8 | DYY | -0.21324 | -0.09579 | -0.05376 | 0.00000  | -0.04831 |
| 162 | C8 | DZZ | -0.00232 | -0.15514 | 0.41551  | 0.00000  | 0.01611  |



|     |     |     |          |          |          |          |          |
|-----|-----|-----|----------|----------|----------|----------|----------|
| 163 | C8  | DXY | 0.14793  | -0.21015 | 0.09009  | 0.00000  | -0.31103 |
| 164 | C8  | DXZ | 0.00000  | 0.00000  | 0.00000  | 0.01337  | 0.00000  |
| 165 | C8  | DYZ | 0.00000  | 0.00000  | 0.00000  | 0.01166  | 0.00000  |
| 166 | H8  | S   | 0.02317  | 0.04480  | 0.12877  | 0.00000  | 0.01333  |
| 167 | H8  | S   | -0.00488 | 0.28066  | 0.80107  | 0.00000  | 0.40070  |
| 168 | H8  | PX  | -0.40454 | -0.03691 | -0.09520 | 0.00000  | 0.06158  |
| 169 | H8  | PY  | -0.03334 | 0.10753  | -0.03937 | 0.00000  | -0.23238 |
| 170 | H8  | PZ  | 0.00000  | 0.00000  | 0.00000  | -0.02035 | 0.00000  |
| 171 | C10 | S   | 0.01860  | 0.00537  | -0.01077 | 0.00000  | 0.02502  |
| 172 | C10 | S   | -0.15630 | 0.11758  | -0.07112 | 0.00000  | -0.27346 |
| 173 | C10 | PX  | -0.02506 | -0.05028 | 0.07016  | 0.00000  | -0.10632 |
| 174 | C10 | PY  | 0.15404  | -0.04757 | 0.08356  | 0.00000  | -0.03439 |
| 175 | C10 | PZ  | 0.00000  | 0.00000  | 0.00000  | 0.00174  | 0.00000  |
| 176 | C10 | S   | 0.72460  | -0.45702 | -1.17341 | 0.00000  | -0.33979 |
| 177 | C10 | PX  | -0.16899 | 0.65601  | 0.61569  | 0.00000  | 0.37600  |
| 178 | C10 | PY  | 0.60939  | -0.29012 | -0.23568 | 0.00000  | 0.24106  |
| 179 | C10 | PZ  | 0.00000  | 0.00000  | 0.00000  | 0.00000  | 0.00000  |
| 180 | C10 | DXX | 0.29446  | -0.08228 | -0.13380 | 0.00000  | 0.21412  |
| 181 | C10 | DYY | -0.20485 | 0.06348  | 0.15532  | 0.00000  | -0.29450 |
| 182 | C10 | DZZ | 0.10283  | 0.02909  | -0.08242 | 0.00000  | 0.17155  |
| 183 | C10 | DXY | 0.12593  | -0.09586 | -0.02024 | 0.00000  | 0.06424  |
| 184 | C10 | DXZ | 0.00000  | 0.00000  | 0.00000  | -0.01012 | 0.00000  |
| 185 | C10 | DYZ | 0.00000  | 0.00000  | 0.00000  | 0.00471  | 0.00000  |
| 186 | H16 | S   | -0.02791 | -0.06094 | -0.03952 | 0.00000  | -0.03339 |
| 187 | H16 | S   | 0.17602  | -0.26715 | -0.22025 | 0.00000  | 0.08126  |
| 188 | H16 | PX  | -0.20784 | 0.09827  | 0.01306  | 0.00000  | -0.28214 |
| 189 | H16 | PY  | -0.32952 | 0.19265  | -0.01276 | 0.00000  | -0.10340 |
| 190 | H16 | PZ  | 0.00000  | 0.00000  | 0.00000  | 0.00747  | 0.00000  |
| 191 | H18 | S   | -0.03835 | 0.12136  | 0.12650  | 0.00000  | 0.08769  |
| 192 | H18 | S   | 0.15722  | 0.00653  | 0.22834  | 0.00000  | 0.21988  |
| 193 | H18 | PX  | 0.33126  | -0.12211 | 0.07962  | 0.00000  | 0.28985  |
| 194 | H18 | PY  | -0.21829 | -0.01891 | 0.16399  | 0.00000  | -0.18881 |
| 195 | H18 | PZ  | 0.00000  | 0.00000  | 0.00000  | -0.00352 | 0.00000  |
| 196 | C9  | S   | 0.00367  | -0.01685 | -0.02792 | 0.00000  | 0.01080  |
| 197 | C9  | S   | -0.21206 | 0.25981  | 0.03818  | 0.00000  | -0.00810 |
| 198 | C9  | PX  | 0.15378  | -0.23977 | -0.14782 | 0.00000  | 0.02904  |
| 199 | C9  | PY  | 0.06568  | -0.10711 | -0.02266 | 0.00000  | 0.04226  |
| 200 | C9  | PZ  | 0.00000  | 0.00000  | 0.00000  | 0.03652  | 0.00000  |
| 201 | C9  | S   | -0.03907 | 0.51227  | 0.59341  | 0.00000  | -0.20527 |
| 202 | C9  | PX  | 0.12141  | -0.13933 | -0.12283 | 0.00000  | 0.00868  |
| 203 | C9  | PY  | -0.39551 | -0.03387 | -0.25037 | 0.00000  | 0.13856  |
| 204 | C9  | PZ  | 0.00000  | 0.00000  | 0.00000  | -0.10230 | 0.00000  |
| 205 | C9  | DXX | 0.04112  | 0.31198  | 0.27027  | 0.00000  | -0.17441 |
| 206 | C9  | DYY | 0.09637  | -0.07767 | -0.03450 | 0.00000  | 0.05604  |
| 207 | C9  | DZZ | -0.09674 | -0.27815 | -0.21334 | 0.00000  | 0.14414  |
| 208 | C9  | DXY | -0.29270 | 0.03157  | 0.01970  | 0.00000  | 0.10429  |
| 209 | C9  | DXZ | 0.00000  | 0.00000  | 0.00000  | -0.31192 | 0.00000  |
| 210 | C9  | DYZ | 0.00000  | 0.00000  | 0.00000  | -0.85972 | 0.00000  |
| 211 | H3  | S   | 0.00911  | -0.02821 | -0.03098 | 0.00000  | -0.00946 |
| 212 | H3  | S   | 0.26715  | -0.06933 | 0.03629  | 0.00000  | -0.05052 |
| 213 | H3  | PX  | 0.17211  | 0.02645  | 0.03489  | 0.00000  | -0.11202 |
| 214 | H3  | PY  | -0.01206 | 0.04859  | 0.06990  | 0.00000  | 0.01002  |
| 215 | H3  | PZ  | 0.00000  | 0.00000  | 0.00000  | 0.59188  | 0.00000  |
| 216 | H5  | S   | -0.04433 | -0.00687 | -0.03944 | 0.02484  | 0.01649  |

|     |    |    |          |          |          |          |          |
|-----|----|----|----------|----------|----------|----------|----------|
| 217 | H5 | S  | -0.04201 | -0.06439 | -0.08057 | -0.06015 | 0.04392  |
| 218 | H5 | PX | -0.10663 | -0.11940 | -0.07851 | -0.19444 | 0.08970  |
| 219 | H5 | PY | 0.18667  | 0.02605  | 0.01488  | -0.46070 | -0.04081 |
| 220 | H5 | PZ | -0.14138 | -0.11652 | -0.11325 | 0.05273  | 0.09787  |
| 221 | H7 | S  | -0.04433 | -0.00687 | -0.03944 | -0.02484 | 0.01649  |
| 222 | H7 | S  | -0.04201 | -0.06439 | -0.08057 | 0.06015  | 0.04392  |
| 223 | H7 | PX | -0.10663 | -0.11940 | -0.07851 | 0.19444  | 0.08970  |
| 224 | H7 | PY | 0.18667  | 0.02605  | 0.01488  | 0.46070  | -0.04081 |
| 225 | H7 | PZ | 0.14138  | 0.11652  | 0.11325  | 0.05273  | -0.09787 |

|              |          |          |          |          |          |
|--------------|----------|----------|----------|----------|----------|
| MO:          | 196      | 197      | 198      | 199      | 200      |
| Eigenvalues: | 3.30396  | 3.34005  | 3.35844  | 3.43095  | 3.45749  |
| (ev):        | 89.90539 | 90.88745 | 91.38780 | 93.36103 | 94.08322 |

|    |    |     | A        | A        | A        | A        | A        |
|----|----|-----|----------|----------|----------|----------|----------|
| 1  | H1 | S   | -0.14225 | 0.01944  | -0.01062 | -0.10608 | 0.18676  |
| 2  | H1 | S   | -0.50753 | 0.06258  | 0.03420  | -0.18966 | 0.31540  |
| 3  | H1 | PX  | 0.38430  | -0.11079 | -0.06560 | 0.13371  | -0.40927 |
| 4  | H1 | PY  | 0.07788  | -0.07082 | 0.11540  | 0.18505  | -0.06589 |
| 5  | H1 | PZ  | 0.00000  | 0.00000  | 0.00000  | 0.00000  | 0.00000  |
| 6  | C1 | S   | -0.02773 | -0.00881 | 0.02010  | -0.00407 | 0.02745  |
| 7  | C1 | S   | 0.20121  | -0.11992 | -0.05674 | 0.05459  | -0.37374 |
| 8  | C1 | PX  | 0.28877  | -0.14105 | 0.09197  | 0.10689  | -0.01752 |
| 9  | C1 | PY  | -0.10761 | -0.05109 | -0.02154 | 0.21541  | -0.19185 |
| 10 | C1 | PZ  | 0.00000  | 0.00000  | 0.00000  | 0.00000  | 0.00000  |
| 11 | C1 | S   | 0.12890  | 1.34093  | -0.28940 | 0.40862  | -0.34332 |
| 12 | C1 | PX  | 1.02338  | -0.00813 | 0.28880  | 0.27916  | -0.18930 |
| 13 | C1 | PY  | -0.90841 | -1.15185 | -0.49948 | -0.12334 | 0.00489  |
| 14 | C1 | PZ  | 0.00000  | 0.00000  | 0.00000  | 0.00000  | 0.00000  |
| 15 | C1 | DXX | -0.18470 | -0.04583 | 0.08182  | 0.18464  | -0.11945 |
| 16 | C1 | DYY | 0.29562  | 0.13361  | -0.22364 | -0.20375 | -0.15669 |
| 17 | C1 | DZZ | -0.17172 | -0.01385 | 0.13106  | -0.03684 | 0.22409  |
| 18 | C1 | DXY | 0.13677  | 0.13499  | -0.03839 | -0.27078 | 0.03780  |
| 19 | C1 | DXZ | 0.00000  | 0.00000  | 0.00000  | 0.00000  | 0.00000  |
| 20 | C1 | DYZ | 0.00000  | 0.00000  | 0.00000  | 0.00000  | 0.00000  |
| 21 | C2 | S   | 0.00170  | -0.03718 | -0.03117 | -0.02120 | -0.02427 |
| 22 | C2 | S   | -0.23685 | -0.05394 | 0.06836  | 0.15211  | 0.30111  |
| 23 | C2 | PX  | -0.04356 | -0.18634 | -0.10003 | -0.00618 | 0.02783  |
| 24 | C2 | PY  | -0.10570 | -0.05462 | 0.03790  | 0.04770  | 0.13781  |
| 25 | C2 | PZ  | 0.00000  | 0.00000  | 0.00000  | 0.00000  | 0.00000  |
| 26 | C2 | S   | 0.75069  | 1.07542  | 0.76943  | 0.18703  | 0.20713  |
| 27 | C2 | PX  | 0.37277  | 0.25950  | -0.03966 | 0.55460  | 0.08805  |
| 28 | C2 | PY  | 1.86914  | 0.72854  | 1.04182  | 0.07907  | -0.30036 |
| 29 | C2 | PZ  | 0.00000  | 0.00000  | 0.00000  | 0.00000  | 0.00000  |
| 30 | C2 | DXX | 0.10726  | -0.10728 | -0.01841 | -0.08759 | 0.03912  |
| 31 | C2 | DYY | -0.18845 | 0.21793  | 0.14567  | 0.20653  | 0.18447  |
| 32 | C2 | DZZ | 0.05041  | -0.21365 | -0.20098 | -0.13041 | -0.19307 |
| 33 | C2 | DXY | -0.19490 | -0.03231 | -0.12217 | 0.24147  | 0.02063  |
| 34 | C2 | DXZ | 0.00000  | 0.00000  | 0.00000  | 0.00000  | 0.00000  |
| 35 | C2 | DYZ | 0.00000  | 0.00000  | 0.00000  | 0.00000  | 0.00000  |
| 36 | C3 | S   | -0.03998 | -0.00779 | -0.03910 | -0.06488 | -0.01843 |
| 37 | C3 | S   | -0.18788 | 0.04899  | 0.04783  | 0.14006  | 0.08412  |
| 38 | C3 | PX  | 0.13665  | -0.08421 | 0.03495  | 0.17867  | 0.10363  |
| 39 | C3 | PY  | -0.34531 | -0.11065 | 0.00862  | -0.13058 | 0.00395  |

|    |    |     |          |          |          |          |          |
|----|----|-----|----------|----------|----------|----------|----------|
| 40 | C3 | PZ  | 0.00000  | 0.00000  | 0.00000  | 0.00000  | 0.00000  |
| 41 | C3 | S   | 3.84317  | -0.19678 | 2.17177  | 2.31791  | 0.75772  |
| 42 | C3 | PX  | -2.09938 | -1.56112 | -0.50079 | -1.40423 | 0.60200  |
| 43 | C3 | PY  | -2.37624 | -1.30951 | -1.48753 | -0.88078 | -0.76650 |
| 44 | C3 | PZ  | 0.00000  | 0.00000  | 0.00000  | 0.00000  | 0.00000  |
| 45 | C3 | DXX | 0.40259  | 0.39535  | -0.09072 | -0.23542 | -0.18650 |
| 46 | C3 | DYY | -0.07540 | -0.27453 | 0.23118  | 0.48306  | 0.24019  |
| 47 | C3 | DZZ | -0.19458 | -0.04863 | -0.17685 | -0.33436 | -0.12472 |
| 48 | C3 | DXY | -0.49737 | 0.24052  | -0.02058 | -0.17331 | 0.03000  |
| 49 | C3 | DXZ | 0.00000  | 0.00000  | 0.00000  | 0.00000  | 0.00000  |
| 50 | C3 | DYZ | 0.00000  | 0.00000  | 0.00000  | 0.00000  | 0.00000  |
| 51 | C4 | S   | 0.00076  | -0.01380 | -0.05249 | -0.01283 | -0.03765 |
| 52 | C4 | S   | -0.19111 | 0.35641  | 0.20510  | 0.09964  | -0.36328 |
| 53 | C4 | PX  | -0.00458 | -0.05070 | -0.05801 | -0.01243 | 0.05982  |
| 54 | C4 | PY  | -0.26900 | 0.08817  | 0.09456  | 0.30209  | -0.45878 |
| 55 | C4 | PZ  | 0.00000  | 0.00000  | 0.00000  | 0.00000  | 0.00000  |
| 56 | C4 | S   | 0.14686  | 0.32343  | 1.10964  | 0.58890  | 0.39663  |
| 57 | C4 | PX  | 1.07922  | 0.12446  | 0.35017  | -0.09675 | -0.20206 |
| 58 | C4 | PY  | -1.10239 | 0.47571  | -0.21797 | 0.33418  | -0.85339 |
| 59 | C4 | PZ  | 0.00000  | 0.00000  | 0.00000  | 0.00000  | 0.00000  |
| 60 | C4 | DXX | -0.08772 | 0.04977  | 0.14780  | -0.23092 | 0.44433  |
| 61 | C4 | DYY | 0.06112  | -0.01409 | -0.08835 | 0.17056  | -0.49713 |
| 62 | C4 | DZZ | 0.06992  | -0.11451 | -0.32104 | -0.09202 | -0.14197 |
| 63 | C4 | DXY | -0.22263 | 0.19950  | -0.12087 | 0.01268  | -0.40521 |
| 64 | C4 | DXZ | 0.00000  | 0.00000  | 0.00000  | 0.00000  | 0.00000  |
| 65 | C4 | DYZ | 0.00000  | 0.00000  | 0.00000  | 0.00000  | 0.00000  |
| 66 | C5 | S   | -0.01102 | 0.02132  | 0.04749  | -0.01827 | 0.06359  |
| 67 | C5 | S   | 0.09847  | -0.06215 | -0.11729 | -0.13099 | -0.26710 |
| 68 | C5 | PX  | 0.04204  | 0.05648  | 0.07656  | 0.06925  | 0.09649  |
| 69 | C5 | PY  | -0.12501 | 0.00035  | -0.09609 | 0.19325  | 0.01433  |
| 70 | C5 | PZ  | 0.00000  | 0.00000  | 0.00000  | 0.00000  | 0.00000  |
| 71 | C5 | S   | -1.05358 | -1.00513 | -1.51959 | 0.00323  | -0.75147 |
| 72 | C5 | PX  | 0.80413  | 0.23339  | 0.29055  | -0.10974 | -0.43686 |
| 73 | C5 | PY  | 1.17786  | 0.45802  | 0.69141  | -0.18168 | -0.15754 |
| 74 | C5 | PZ  | 0.00000  | 0.00000  | 0.00000  | 0.00000  | 0.00000  |
| 75 | C5 | DXX | -0.13818 | -0.30561 | -0.13026 | 0.20736  | 0.24954  |
| 76 | C5 | DYY | 0.22899  | 0.11599  | -0.03890 | -0.24648 | -0.35128 |
| 77 | C5 | DZZ | -0.09387 | 0.14395  | 0.28086  | -0.06575 | 0.37886  |
| 78 | C5 | DXY | 0.05375  | -0.08961 | -0.15754 | 0.01798  | -0.15030 |
| 79 | C5 | DXZ | 0.00000  | 0.00000  | 0.00000  | 0.00000  | 0.00000  |
| 80 | C5 | DYZ | 0.00000  | 0.00000  | 0.00000  | 0.00000  | 0.00000  |
| 81 | C6 | S   | 0.02665  | 0.02650  | 0.02485  | 0.01157  | 0.01666  |
| 82 | C6 | S   | 0.56473  | -0.00678 | 0.09544  | 0.65635  | -0.09658 |
| 83 | C6 | PX  | 0.04813  | -0.09744 | 0.15041  | -0.04508 | 0.01665  |
| 84 | C6 | PY  | -0.31262 | -0.03882 | -0.07241 | -0.37335 | 0.04125  |
| 85 | C6 | PZ  | 0.00000  | 0.00000  | 0.00000  | 0.00000  | 0.00000  |
| 86 | C6 | S   | -1.00395 | -1.67050 | -0.95616 | -0.81205 | -0.54640 |
| 87 | C6 | PX  | -3.02262 | -1.06017 | -1.26323 | -1.34403 | 0.24054  |
| 88 | C6 | PY  | -1.59435 | -0.23783 | 0.33223  | -1.67518 | 0.33891  |
| 89 | C6 | PZ  | 0.00000  | 0.00000  | 0.00000  | 0.00000  | 0.00000  |
| 90 | C6 | DXX | -0.18825 | -0.46403 | -0.15809 | -0.37133 | 0.00600  |
| 91 | C6 | DYY | 0.08908  | 0.30564  | 0.04678  | 0.51037  | 0.00619  |
| 92 | C6 | DZZ | -0.00456 | 0.12975  | 0.14065  | -0.09865 | 0.10945  |
| 93 | C6 | DXY | -0.26598 | -0.22087 | -0.08222 | 0.19708  | 0.35888  |

|     |    |     |          |          |          |          |          |
|-----|----|-----|----------|----------|----------|----------|----------|
| 94  | C6 | DXZ | 0.00000  | 0.00000  | 0.00000  | 0.00000  | 0.00000  |
| 95  | C6 | DYZ | 0.00000  | 0.00000  | 0.00000  | 0.00000  | 0.00000  |
| 96  | C7 | S   | 0.05182  | -0.01986 | 0.00281  | 0.02755  | 0.00994  |
| 97  | C7 | S   | 0.12463  | -0.00281 | 0.31039  | 0.08279  | 0.03832  |
| 98  | C7 | PX  | 0.04330  | -0.29204 | 0.35662  | 0.33553  | 0.05447  |
| 99  | C7 | PY  | -0.26300 | -0.07779 | -0.16427 | -0.19040 | -0.07745 |
| 100 | C7 | PZ  | 0.00000  | 0.00000  | 0.00000  | 0.00000  | 0.00000  |
| 101 | C7 | S   | -3.74140 | 0.22525  | -2.01191 | -1.81835 | -1.02117 |
| 102 | C7 | PX  | 2.16096  | 0.15012  | 1.47045  | 1.24057  | 0.42871  |
| 103 | C7 | PY  | 0.62249  | 0.45881  | -0.15446 | 0.76519  | -0.47846 |
| 104 | C7 | PZ  | 0.00000  | 0.00000  | 0.00000  | 0.00000  | 0.00000  |
| 105 | C7 | DXX | -0.00557 | 0.05286  | 0.10108  | 0.08966  | 0.02133  |
| 106 | C7 | DYY | -0.41204 | 0.04847  | -0.02134 | -0.24872 | -0.07117 |
| 107 | C7 | DZZ | 0.28602  | -0.09853 | -0.03721 | 0.13024  | 0.04906  |
| 108 | C7 | DXY | 0.36409  | 0.34899  | 0.16735  | 0.45275  | 0.23066  |
| 109 | C7 | DXZ | 0.00000  | 0.00000  | 0.00000  | 0.00000  | 0.00000  |
| 110 | C7 | DYZ | 0.00000  | 0.00000  | 0.00000  | 0.00000  | 0.00000  |
| 111 | O1 | S   | 0.00467  | -0.01136 | 0.02154  | 0.01988  | 0.01281  |
| 112 | O1 | S   | -0.06431 | 0.17978  | 0.22771  | 0.05013  | -0.09109 |
| 113 | O1 | PX  | 0.02891  | -0.03610 | -0.02140 | -0.03189 | 0.08591  |
| 114 | O1 | PY  | 0.06739  | -0.04745 | -0.03898 | 0.01618  | 0.00107  |
| 115 | O1 | PZ  | 0.00000  | 0.00000  | 0.00000  | 0.00000  | 0.00000  |
| 116 | O1 | S   | 0.33518  | -0.45389 | -0.74357 | -0.47011 | 0.26255  |
| 117 | O1 | PX  | -0.43854 | 0.15477  | -0.08514 | 0.21665  | -0.51868 |
| 118 | O1 | PY  | -0.65054 | 0.45029  | 0.16038  | 0.42949  | -1.02059 |
| 119 | O1 | PZ  | 0.00000  | 0.00000  | 0.00000  | 0.00000  | 0.00000  |
| 120 | O1 | DXX | -0.37439 | 0.09341  | 0.02369  | 0.29053  | -0.43735 |
| 121 | O1 | DYY | 0.36160  | -0.23211 | -0.11547 | -0.29832 | 0.71567  |
| 122 | O1 | DZZ | 0.04205  | -0.00299 | 0.21253  | 0.09377  | 0.00432  |
| 123 | O1 | DXY | -0.22500 | 0.12455  | -0.21309 | -0.03371 | -0.26249 |
| 124 | O1 | DXZ | 0.00000  | 0.00000  | 0.00000  | 0.00000  | 0.00000  |
| 125 | O1 | DYZ | 0.00000  | 0.00000  | 0.00000  | 0.00000  | 0.00000  |
| 126 | H4 | S   | 0.03829  | 0.08122  | 0.11529  | -0.00592 | 0.09736  |
| 127 | H4 | S   | 0.02520  | 0.08082  | 0.14739  | 0.02129  | 0.14045  |
| 128 | H4 | PX  | -0.15363 | -0.06094 | 0.10583  | 0.09296  | 0.36068  |
| 129 | H4 | PY  | -0.23953 | -0.28938 | -0.27538 | 0.10281  | -0.00029 |
| 130 | H4 | PZ  | 0.00000  | 0.00000  | 0.00000  | 0.00000  | 0.00000  |
| 131 | N1 | S   | 0.01412  | 0.01067  | -0.00343 | 0.00386  | 0.00579  |
| 132 | N1 | S   | 0.21860  | -0.27698 | 0.09305  | -0.06108 | -0.09196 |
| 133 | N1 | PX  | -0.06909 | -0.14820 | -0.01722 | -0.02370 | -0.01201 |
| 134 | N1 | PY  | 0.02361  | -0.05620 | 0.00796  | -0.19440 | 0.01243  |
| 135 | N1 | PZ  | 0.00000  | 0.00000  | 0.00000  | 0.00000  | 0.00000  |
| 136 | N1 | S   | -1.23713 | 0.49140  | -0.10836 | -0.43587 | 0.23862  |
| 137 | N1 | PX  | 0.63897  | 0.16554  | -0.16017 | 0.96664  | -0.07708 |
| 138 | N1 | PY  | -1.53342 | 0.13652  | -0.04786 | -1.53177 | 0.32685  |
| 139 | N1 | PZ  | 0.00000  | 0.00000  | 0.00000  | 0.00000  | 0.00000  |
| 140 | N1 | DXX | 0.23447  | -0.11770 | -0.22724 | 0.58220  | 0.00065  |
| 141 | N1 | DYY | -0.38450 | 0.09802  | 0.10468  | -0.75496 | 0.02637  |
| 142 | N1 | DZZ | 0.09331  | 0.00673  | 0.02549  | 0.06188  | 0.00781  |
| 143 | N1 | DXY | -0.28568 | -0.03255 | -0.23615 | -0.10810 | 0.31465  |
| 144 | N1 | DXZ | 0.00000  | 0.00000  | 0.00000  | 0.00000  | 0.00000  |
| 145 | N1 | DYZ | 0.00000  | 0.00000  | 0.00000  | 0.00000  | 0.00000  |
| 146 | H6 | S   | 0.09856  | -0.03690 | -0.03229 | -0.02236 | -0.08378 |
| 147 | H6 | S   | 0.29640  | -0.05682 | -0.07999 | 0.14768  | -0.10163 |

|     |     |     |          |          |          |          |          |
|-----|-----|-----|----------|----------|----------|----------|----------|
| 148 | H6  | PX  | 0.14122  | -0.21527 | -0.11777 | -0.22407 | -0.19369 |
| 149 | H6  | PY  | -0.22825 | -0.06671 | -0.20585 | 0.20690  | -0.01339 |
| 150 | H6  | PZ  | 0.00000  | 0.00000  | 0.00000  | 0.00000  | 0.00000  |
| 151 | C8  | S   | -0.01405 | 0.03382  | -0.03601 | 0.03132  | 0.01564  |
| 152 | C8  | S   | -0.32214 | -0.28164 | 0.15152  | -0.46027 | -0.13565 |
| 153 | C8  | PX  | 0.09876  | -0.15801 | 0.05044  | 0.10698  | -0.09819 |
| 154 | C8  | PY  | -0.14035 | 0.15572  | -0.39700 | -0.03459 | 0.08911  |
| 155 | C8  | PZ  | 0.00000  | 0.00000  | 0.00000  | 0.00000  | 0.00000  |
| 156 | C8  | S   | 1.71287  | -0.13974 | 1.30611  | 0.35530  | 0.00696  |
| 157 | C8  | PX  | 1.66252  | 0.31957  | 0.17777  | 1.71494  | -0.24931 |
| 158 | C8  | PY  | 1.47201  | -0.21700 | 1.04683  | 0.57322  | 0.19427  |
| 159 | C8  | PZ  | 0.00000  | 0.00000  | 0.00000  | 0.00000  | 0.00000  |
| 160 | C8  | DXX | -0.03972 | 0.34668  | -0.27227 | -0.00067 | 0.27022  |
| 161 | C8  | DYY | 0.14215  | -0.46003 | 0.49473  | -0.04611 | -0.26923 |
| 162 | C8  | DZZ | -0.05071 | 0.23190  | -0.25018 | 0.22160  | 0.09791  |
| 163 | C8  | DXY | 0.04430  | -0.38832 | -0.42191 | 0.31492  | 0.02732  |
| 164 | C8  | DXZ | 0.00000  | 0.00000  | 0.00000  | 0.00000  | 0.00000  |
| 165 | C8  | DYZ | 0.00000  | 0.00000  | 0.00000  | 0.00000  | 0.00000  |
| 166 | H8  | S   | -0.00496 | 0.03702  | -0.24166 | -0.14641 | -0.00489 |
| 167 | H8  | S   | -0.40924 | 0.02926  | -0.62598 | -0.38421 | -0.11544 |
| 168 | H8  | PX  | -0.20407 | -0.24100 | 0.51682  | 0.21453  | 0.01470  |
| 169 | H8  | PY  | -0.20877 | -0.21891 | -0.08099 | -0.37454 | -0.09836 |
| 170 | H8  | PZ  | 0.00000  | 0.00000  | 0.00000  | 0.00000  | 0.00000  |
| 171 | C10 | S   | 0.01320  | -0.02624 | 0.04174  | -0.00580 | -0.01662 |
| 172 | C10 | S   | 0.01090  | 0.19869  | -0.39494 | 0.17076  | 0.17558  |
| 173 | C10 | PX  | -0.03756 | -0.41575 | -0.11225 | 0.12495  | -0.04118 |
| 174 | C10 | PY  | -0.06801 | 0.04571  | -0.24172 | 0.07250  | 0.06869  |
| 175 | C10 | PZ  | 0.00000  | 0.00000  | 0.00000  | 0.00000  | 0.00000  |
| 176 | C10 | S   | 0.17891  | 0.11352  | -0.08847 | 0.10802  | 0.33219  |
| 177 | C10 | PX  | -0.64817 | -0.34974 | -0.36179 | -0.40534 | -0.04308 |
| 178 | C10 | PY  | -0.18907 | -0.12738 | 0.11358  | -0.20966 | 0.03565  |
| 179 | C10 | PZ  | 0.00000  | 0.00000  | 0.00000  | 0.00000  | 0.00000  |
| 180 | C10 | DXX | 0.04980  | -0.15264 | 0.19982  | 0.00035  | -0.01112 |
| 181 | C10 | DYY | -0.09340 | 0.33590  | -0.58190 | 0.13538  | 0.18362  |
| 182 | C10 | DZZ | 0.08443  | -0.20954 | 0.34097  | -0.07820 | -0.14181 |
| 183 | C10 | DXY | 0.02330  | -0.13884 | 0.19604  | -0.09258 | -0.04132 |
| 184 | C10 | DXZ | 0.00000  | 0.00000  | 0.00000  | 0.00000  | 0.00000  |
| 185 | C10 | DYZ | 0.00000  | 0.00000  | 0.00000  | 0.00000  | 0.00000  |
| 186 | H16 | S   | 0.08350  | 0.10957  | 0.16308  | -0.06085 | -0.03735 |
| 187 | H16 | S   | 0.19825  | 0.19488  | 0.37533  | 0.00103  | -0.05032 |
| 188 | H16 | PX  | -0.02666 | -0.12658 | -0.45191 | 0.24326  | 0.11521  |
| 189 | H16 | PY  | -0.00481 | 0.33087  | -0.05649 | -0.05803 | 0.02789  |
| 190 | H16 | PZ  | 0.00000  | 0.00000  | 0.00000  | 0.00000  | 0.00000  |
| 191 | H18 | S   | -0.06296 | -0.17090 | 0.00395  | -0.00774 | -0.08627 |
| 192 | H18 | S   | -0.28037 | -0.35519 | 0.00809  | -0.20626 | -0.08941 |
| 193 | H18 | PX  | -0.04828 | -0.36107 | 0.28043  | -0.06969 | -0.14749 |
| 194 | H18 | PY  | -0.03474 | -0.26136 | -0.13139 | 0.08430  | -0.07711 |
| 195 | H18 | PZ  | 0.00000  | 0.00000  | 0.00000  | 0.00000  | 0.00000  |
| 196 | C9  | S   | -0.02681 | 0.00281  | -0.01217 | 0.01844  | -0.04368 |
| 197 | C9  | S   | 0.22951  | -0.16023 | 0.06812  | -0.16036 | 0.37647  |
| 198 | C9  | PX  | -0.18115 | 0.06271  | -0.10934 | 0.01594  | -0.17839 |
| 199 | C9  | PY  | -0.00685 | 0.01309  | -0.03163 | 0.00467  | 0.03265  |
| 200 | C9  | PZ  | 0.00000  | 0.00000  | 0.00000  | 0.00000  | 0.00000  |
| 201 | C9  | S   | 0.50918  | -0.07527 | 0.23325  | -0.29584 | 0.92058  |

|     |    |     |          |          |          |          |          |
|-----|----|-----|----------|----------|----------|----------|----------|
| 202 | C9 | PX  | -0.21703 | 0.14154  | -0.04753 | 0.07719  | -0.30348 |
| 203 | C9 | PY  | -0.00386 | -0.29267 | -0.05751 | -0.00126 | 0.13734  |
| 204 | C9 | PZ  | 0.00000  | 0.00000  | 0.00000  | 0.00000  | 0.00000  |
| 205 | C9 | DXX | -0.05128 | 0.01938  | 0.21356  | 0.14736  | -0.09106 |
| 206 | C9 | DYY | 0.00531  | 0.01308  | -0.06867 | -0.06072 | 0.11426  |
| 207 | C9 | DZZ | 0.04471  | -0.01819 | -0.16402 | -0.08021 | -0.02192 |
| 208 | C9 | DXY | 0.27644  | -0.09911 | -0.07007 | -0.14351 | 0.19287  |
| 209 | C9 | DXZ | 0.00000  | 0.00000  | 0.00000  | 0.00000  | 0.00000  |
| 210 | C9 | DYZ | 0.00000  | 0.00000  | 0.00000  | 0.00000  | 0.00000  |
| 211 | H3 | S   | -0.06556 | 0.05540  | -0.01385 | 0.05993  | -0.22580 |
| 212 | H3 | S   | -0.13643 | 0.19656  | -0.01174 | 0.07286  | -0.29099 |
| 213 | H3 | PX  | -0.19091 | 0.08719  | 0.09661  | 0.13654  | -0.20600 |
| 214 | H3 | PY  | 0.13289  | -0.06882 | 0.03588  | -0.09709 | 0.32954  |
| 215 | H3 | PZ  | 0.00000  | 0.00000  | 0.00000  | 0.00000  | 0.00000  |
| 216 | H5 | S   | -0.05527 | -0.02720 | -0.00106 | 0.05259  | -0.06167 |
| 217 | H5 | S   | 0.02908  | -0.04699 | -0.04288 | 0.03421  | -0.08369 |
| 218 | H5 | PX  | 0.13535  | -0.04767 | -0.07912 | -0.11949 | 0.15549  |
| 219 | H5 | PY  | -0.13516 | 0.09337  | 0.03126  | 0.05955  | -0.12571 |
| 220 | H5 | PZ  | 0.04483  | -0.04346 | -0.06851 | 0.02485  | -0.05603 |
| 221 | H7 | S   | -0.05527 | -0.02720 | -0.00106 | 0.05259  | -0.06167 |
| 222 | H7 | S   | 0.02908  | -0.04699 | -0.04288 | 0.03421  | -0.08369 |
| 223 | H7 | PX  | 0.13535  | -0.04767 | -0.07912 | -0.11949 | 0.15549  |
| 224 | H7 | PY  | -0.13516 | 0.09337  | 0.03126  | 0.05955  | -0.12571 |
| 225 | H7 | PZ  | -0.04483 | 0.04346  | 0.06851  | -0.02485 | 0.05603  |

|              |          |          |          |          |           |
|--------------|----------|----------|----------|----------|-----------|
| M0:          | 201      | 202      | 203      | 204      | 205       |
| Eigenvalues: | 3.52337  | 3.56160  | 3.57691  | 3.66981  | 3.72630   |
| (ev):        | 95.87591 | 96.91612 | 97.33263 | 99.86077 | 101.39790 |

|    |    |     |          |          |          |          |          |
|----|----|-----|----------|----------|----------|----------|----------|
|    |    | A   | A        | A        | A        | A        |          |
| 1  | H1 | S   | -0.04330 | 0.22972  | -0.12081 | 0.07766  | 0.01208  |
| 2  | H1 | S   | -0.04892 | 0.17382  | 0.06527  | 0.04686  | -0.02133 |
| 3  | H1 | PX  | 0.03345  | -0.48068 | 0.17057  | -0.11620 | 0.02010  |
| 4  | H1 | PY  | 0.28089  | -0.03319 | 0.05683  | -0.01976 | -0.18129 |
| 5  | H1 | PZ  | 0.00000  | 0.00000  | 0.00000  | 0.00000  | 0.00000  |
| 6  | C1 | S   | -0.02783 | 0.01993  | -0.00250 | -0.00094 | 0.00516  |
| 7  | C1 | S   | 0.12237  | -0.01099 | 0.07455  | -0.02621 | -0.10345 |
| 8  | C1 | PX  | -0.06844 | -0.43907 | 0.08044  | -0.04071 | 0.10548  |
| 9  | C1 | PY  | 0.10772  | -0.02461 | 0.07589  | -0.06373 | -0.12162 |
| 10 | C1 | PZ  | 0.00000  | 0.00000  | 0.00000  | 0.00000  | 0.00000  |
| 11 | C1 | S   | 0.21798  | -0.28041 | -0.00538 | -0.05516 | 0.18004  |
| 12 | C1 | PX  | -0.19315 | 0.34797  | -0.12836 | -0.00760 | -0.03680 |
| 13 | C1 | PY  | 0.10923  | -0.64942 | 0.07576  | -0.01609 | 0.34903  |
| 14 | C1 | PZ  | 0.00000  | 0.00000  | 0.00000  | 0.00000  | 0.00000  |
| 15 | C1 | DXX | 0.21334  | -0.01351 | 0.12247  | -0.07204 | -0.20603 |
| 16 | C1 | DYY | -0.09252 | -0.01939 | -0.04721 | 0.00402  | 0.12190  |
| 17 | C1 | DZZ | -0.16691 | 0.11194  | -0.04326 | 0.01162  | 0.05378  |
| 18 | C1 | DXY | -0.34679 | -0.25386 | 0.01800  | -0.05104 | 0.24815  |
| 19 | C1 | DXZ | 0.00000  | 0.00000  | 0.00000  | 0.00000  | 0.00000  |
| 20 | C1 | DYZ | 0.00000  | 0.00000  | 0.00000  | 0.00000  | 0.00000  |
| 21 | C2 | S   | 0.03757  | -0.01840 | 0.00687  | -0.02469 | -0.00260 |
| 22 | C2 | S   | 0.00708  | 0.05198  | -0.02142 | 0.31002  | 0.02111  |
| 23 | C2 | PX  | 0.09138  | -0.19026 | -0.00157 | -0.53312 | 0.02921  |
| 24 | C2 | PY  | 0.31312  | -0.05451 | 0.00696  | -0.02880 | 0.18859  |

|    |    |     |          |          |          |          |          |
|----|----|-----|----------|----------|----------|----------|----------|
| 25 | C2 | PZ  | 0.00000  | 0.00000  | 0.00000  | 0.00000  | 0.00000  |
| 26 | C2 | S   | -0.82855 | 0.00948  | -0.29814 | 0.46780  | 0.19785  |
| 27 | C2 | PX  | -0.22269 | 0.09300  | -0.05542 | -0.18562 | 0.32766  |
| 28 | C2 | PY  | -1.33167 | 0.55636  | -0.26845 | 0.12978  | -0.05588 |
| 29 | C2 | PZ  | 0.00000  | 0.00000  | 0.00000  | 0.00000  | 0.00000  |
| 30 | C2 | DXX | -0.37435 | -0.09137 | -0.02114 | 0.48035  | -0.17527 |
| 31 | C2 | DYY | 0.22956  | 0.04339  | 0.02069  | -0.18586 | 0.24494  |
| 32 | C2 | DZZ | 0.18962  | -0.11140 | 0.03559  | -0.19847 | -0.02977 |
| 33 | C2 | DXY | 0.46416  | 0.14964  | 0.06521  | 0.36348  | 0.24760  |
| 34 | C2 | DXZ | 0.00000  | 0.00000  | 0.00000  | 0.00000  | 0.00000  |
| 35 | C2 | DYZ | 0.00000  | 0.00000  | 0.00000  | 0.00000  | 0.00000  |
| 36 | C3 | S   | 0.04138  | -0.03755 | 0.00318  | -0.02117 | -0.02119 |
| 37 | C3 | S   | 0.49682  | -0.17578 | 0.04073  | -0.03274 | -0.15879 |
| 38 | C3 | PX  | 0.07199  | -0.21220 | 0.01623  | 0.01842  | -0.13103 |
| 39 | C3 | PY  | -0.05722 | 0.14774  | -0.02031 | -0.03902 | -0.04589 |
| 40 | C3 | PZ  | 0.00000  | 0.00000  | 0.00000  | 0.00000  | 0.00000  |
| 41 | C3 | S   | -3.93029 | 2.12391  | -0.78744 | 0.93063  | 1.15737  |
| 42 | C3 | PX  | 1.01872  | -1.71149 | -0.06786 | -0.17098 | -0.22691 |
| 43 | C3 | PY  | 1.60404  | -1.24683 | 0.80794  | -0.35110 | -0.24459 |
| 44 | C3 | PZ  | 0.00000  | 0.00000  | 0.00000  | 0.00000  | 0.00000  |
| 45 | C3 | DXX | -0.18164 | 0.34661  | -0.03317 | 0.06061  | 0.15575  |
| 46 | C3 | DYY | 0.07402  | -0.25248 | 0.01874  | -0.02194 | -0.10610 |
| 47 | C3 | DZZ | 0.14634  | -0.12148 | 0.00992  | -0.10152 | -0.08814 |
| 48 | C3 | DXY | -0.31001 | 0.29485  | 0.00411  | -0.12906 | 0.17675  |
| 49 | C3 | DXZ | 0.00000  | 0.00000  | 0.00000  | 0.00000  | 0.00000  |
| 50 | C3 | DYZ | 0.00000  | 0.00000  | 0.00000  | 0.00000  | 0.00000  |
| 51 | C4 | S   | 0.04210  | 0.02001  | 0.00824  | -0.01580 | -0.02340 |
| 52 | C4 | S   | -0.47560 | -0.39648 | 0.21990  | 0.06096  | 0.21246  |
| 53 | C4 | PX  | -0.08959 | -0.15226 | 0.01045  | -0.05688 | 0.19821  |
| 54 | C4 | PY  | -0.10540 | -0.16898 | 0.23514  | -0.02474 | 0.01191  |
| 55 | C4 | PZ  | 0.00000  | 0.00000  | 0.00000  | 0.00000  | 0.00000  |
| 56 | C4 | S   | -0.76218 | 0.07911  | 0.12966  | 0.29282  | 0.35252  |
| 57 | C4 | PX  | -0.05911 | 0.55566  | 0.10248  | -0.08438 | -0.53524 |
| 58 | C4 | PY  | 0.00715  | -0.56913 | 1.02540  | -0.13796 | 0.15796  |
| 59 | C4 | PZ  | 0.00000  | 0.00000  | 0.00000  | 0.00000  | 0.00000  |
| 60 | C4 | DXX | 0.08397  | 0.27424  | -0.17810 | 0.07595  | -0.15672 |
| 61 | C4 | DYY | -0.22739 | -0.26249 | 0.24361  | -0.11232 | 0.13295  |
| 62 | C4 | DZZ | 0.30375  | 0.16929  | -0.01684 | -0.05713 | -0.15891 |
| 63 | C4 | DXY | 0.22416  | 0.46639  | 0.02809  | -0.05668 | -0.36013 |
| 64 | C4 | DXZ | 0.00000  | 0.00000  | 0.00000  | 0.00000  | 0.00000  |
| 65 | C4 | DYZ | 0.00000  | 0.00000  | 0.00000  | 0.00000  | 0.00000  |
| 66 | C5 | S   | -0.02493 | 0.00871  | -0.02843 | -0.02934 | 0.00694  |
| 67 | C5 | S   | -0.12959 | -0.17323 | 0.07780  | 0.38183  | -0.09475 |
| 68 | C5 | PX  | -0.00287 | -0.06244 | -0.00917 | -0.46541 | 0.16997  |
| 69 | C5 | PY  | 0.23847  | 0.00958  | 0.09251  | 0.42146  | 0.12011  |
| 70 | C5 | PZ  | 0.00000  | 0.00000  | 0.00000  | 0.00000  | 0.00000  |
| 71 | C5 | S   | 1.64690  | -0.11980 | 0.71506  | -0.01255 | -0.52998 |
| 72 | C5 | PX  | -0.36408 | 0.19356  | 0.11338  | -0.34813 | -0.27857 |
| 73 | C5 | PY  | -0.74542 | 0.16376  | -0.34142 | 0.44268  | -0.13798 |
| 74 | C5 | PZ  | 0.00000  | 0.00000  | 0.00000  | 0.00000  | 0.00000  |
| 75 | C5 | DXX | 0.22826  | -0.25146 | 0.05380  | 0.19384  | 0.26588  |
| 76 | C5 | DYY | -0.32672 | 0.15302  | -0.03769 | 0.08071  | -0.35964 |
| 77 | C5 | DZZ | -0.08849 | 0.07307  | -0.14448 | -0.23430 | 0.06613  |
| 78 | C5 | DXY | 0.05602  | 0.04203  | -0.02114 | -0.63341 | 0.06324  |

|     |    |     |          |          |          |          |          |
|-----|----|-----|----------|----------|----------|----------|----------|
| 79  | C5 | DXZ | 0.00000  | 0.00000  | 0.00000  | 0.00000  | 0.00000  |
| 80  | C5 | DYZ | 0.00000  | 0.00000  | 0.00000  | 0.00000  | 0.00000  |
| 81  | C6 | S   | -0.06717 | 0.03664  | -0.00936 | 0.00213  | 0.00724  |
| 82  | C6 | S   | -0.06331 | 0.45840  | -0.01763 | 0.10348  | 0.11921  |
| 83  | C6 | PX  | -0.04213 | -0.13794 | -0.01701 | -0.04036 | -0.12819 |
| 84  | C6 | PY  | 0.28394  | -0.34399 | 0.03413  | 0.07136  | -0.03186 |
| 85  | C6 | PZ  | 0.00000  | 0.00000  | 0.00000  | 0.00000  | 0.00000  |
| 86  | C6 | S   | 1.67318  | -1.16995 | 0.25425  | -0.26772 | -0.61482 |
| 87  | C6 | PX  | 2.32562  | -1.99389 | 0.35934  | -0.33953 | -0.20961 |
| 88  | C6 | PY  | 0.36907  | -0.93803 | -0.04974 | -0.02825 | -0.32726 |
| 89  | C6 | PZ  | 0.00000  | 0.00000  | 0.00000  | 0.00000  | 0.00000  |
| 90  | C6 | DXX | 0.18889  | -0.49842 | 0.02654  | 0.08225  | -0.21428 |
| 91  | C6 | DYY | -0.09350 | 0.48283  | -0.01191 | -0.14066 | 0.18624  |
| 92  | C6 | DZZ | -0.25724 | 0.06403  | -0.03760 | 0.02771  | 0.00424  |
| 93  | C6 | DXY | -0.46909 | -0.33222 | -0.04701 | -0.18543 | -0.17918 |
| 94  | C6 | DXZ | 0.00000  | 0.00000  | 0.00000  | 0.00000  | 0.00000  |
| 95  | C6 | DYZ | 0.00000  | 0.00000  | 0.00000  | 0.00000  | 0.00000  |
| 96  | C7 | S   | -0.03317 | 0.01105  | -0.01032 | 0.01652  | 0.05935  |
| 97  | C7 | S   | -0.26032 | 0.23308  | -0.07486 | 0.01827  | -0.12055 |
| 98  | C7 | PX  | 0.02184  | 0.06698  | -0.00593 | -0.03744 | -0.25661 |
| 99  | C7 | PY  | -0.17920 | 0.17567  | 0.00385  | -0.04819 | 0.11060  |
| 100 | C7 | PZ  | 0.00000  | 0.00000  | 0.00000  | 0.00000  | 0.00000  |
| 101 | C7 | S   | 2.99782  | -1.54857 | 1.09591  | -0.92887 | -1.42964 |
| 102 | C7 | PX  | -1.68849 | 1.11861  | -0.53213 | 0.48753  | 0.35177  |
| 103 | C7 | PY  | -0.05911 | 0.69608  | 0.13648  | -0.00696 | 0.33282  |
| 104 | C7 | PZ  | 0.00000  | 0.00000  | 0.00000  | 0.00000  | 0.00000  |
| 105 | C7 | DXX | 0.09461  | 0.02385  | 0.01901  | -0.06640 | -0.21728 |
| 106 | C7 | DYY | 0.06197  | -0.00965 | 0.03464  | -0.04205 | 0.17075  |
| 107 | C7 | DZZ | -0.10835 | -0.00472 | -0.03611 | 0.09314  | 0.29821  |
| 108 | C7 | DXY | 0.35948  | -0.40767 | 0.03382  | 0.03402  | -0.10839 |
| 109 | C7 | DXZ | 0.00000  | 0.00000  | 0.00000  | 0.00000  | 0.00000  |
| 110 | C7 | DYZ | 0.00000  | 0.00000  | 0.00000  | 0.00000  | 0.00000  |
| 111 | O1 | S   | -0.02087 | -0.03397 | -0.00930 | 0.01001  | 0.03029  |
| 112 | O1 | S   | -0.22877 | -0.18839 | 0.25334  | 0.06897  | 0.05540  |
| 113 | O1 | PX  | 0.03799  | 0.05226  | 0.09661  | -0.00299 | -0.00773 |
| 114 | O1 | PY  | 0.01042  | -0.00155 | 0.03900  | -0.03608 | 0.01767  |
| 115 | O1 | PZ  | 0.00000  | 0.00000  | 0.00000  | 0.00000  | 0.00000  |
| 116 | O1 | S   | 0.75921  | 0.91385  | -0.65507 | -0.22716 | -0.50142 |
| 117 | O1 | PX  | -0.15213 | -0.20550 | 0.32177  | -0.05606 | 0.12727  |
| 118 | O1 | PY  | -0.45387 | -0.37647 | 0.74708  | -0.02298 | 0.12663  |
| 119 | O1 | PZ  | 0.00000  | 0.00000  | 0.00000  | 0.00000  | 0.00000  |
| 120 | O1 | DXX | -0.16382 | -0.18159 | 0.38862  | -0.04282 | 0.11972  |
| 121 | O1 | DYY | 0.34434  | 0.29402  | -0.40886 | 0.05924  | -0.06391 |
| 122 | O1 | DZZ | -0.22499 | -0.23688 | -0.03124 | 0.06777  | 0.15228  |
| 123 | O1 | DXY | 0.23075  | 0.40851  | 0.11948  | -0.10724 | -0.22264 |
| 124 | O1 | DXZ | 0.00000  | 0.00000  | 0.00000  | 0.00000  | 0.00000  |
| 125 | O1 | DYZ | 0.00000  | 0.00000  | 0.00000  | 0.00000  | 0.00000  |
| 126 | H4 | S   | -0.05327 | 0.07282  | -0.06516 | -0.66170 | 0.09229  |
| 127 | H4 | S   | -0.10378 | 0.04702  | 0.00659  | -0.52909 | 0.05767  |
| 128 | H4 | PX  | 0.12152  | 0.00427  | -0.07847 | -0.67502 | 0.21443  |
| 129 | H4 | PY  | 0.22825  | -0.13826 | 0.11849  | 0.77471  | 0.00415  |
| 130 | H4 | PZ  | 0.00000  | 0.00000  | 0.00000  | 0.00000  | 0.00000  |
| 131 | N1 | S   | -0.00554 | -0.01430 | -0.00009 | -0.00733 | 0.01633  |
| 132 | N1 | S   | 0.05886  | -0.02327 | -0.01197 | 0.15799  | -0.13916 |



|     |     |     |          |          |          |          |          |
|-----|-----|-----|----------|----------|----------|----------|----------|
| 133 | N1  | PX  | -0.04687 | -0.00887 | -0.00354 | -0.01653 | -0.04352 |
| 134 | N1  | PY  | 0.03635  | -0.16052 | -0.00094 | 0.09070  | -0.04052 |
| 135 | N1  | PZ  | 0.00000  | 0.00000  | 0.00000  | 0.00000  | 0.00000  |
| 136 | N1  | S   | 0.20124  | -0.01286 | 0.03132  | -0.20249 | 0.00393  |
| 137 | N1  | PX  | -0.52594 | 0.80459  | -0.02538 | -0.08928 | 0.13212  |
| 138 | N1  | PY  | 0.48560  | -1.15778 | 0.06273  | -0.07989 | -0.15471 |
| 139 | N1  | PZ  | 0.00000  | 0.00000  | 0.00000  | 0.00000  | 0.00000  |
| 140 | N1  | DXX | -0.29822 | 0.35953  | -0.01556 | -0.12279 | 0.12554  |
| 141 | N1  | DYY | 0.22896  | -0.49884 | 0.02583  | 0.04630  | -0.02287 |
| 142 | N1  | DZZ | 0.01283  | -0.02196 | -0.00099 | -0.01281 | 0.05035  |
| 143 | N1  | DXY | -0.26914 | -0.42790 | -0.01697 | -0.04627 | -0.11714 |
| 144 | N1  | DXZ | 0.00000  | 0.00000  | 0.00000  | 0.00000  | 0.00000  |
| 145 | N1  | DYZ | 0.00000  | 0.00000  | 0.00000  | 0.00000  | 0.00000  |
| 146 | H6  | S   | 0.09616  | -0.05448 | -0.00051 | -0.54816 | 0.04483  |
| 147 | H6  | S   | -0.05241 | -0.02089 | -0.00256 | -0.36532 | 0.09953  |
| 148 | H6  | PX  | 0.15231  | -0.22623 | 0.00157  | -0.83240 | -0.02283 |
| 149 | H6  | PY  | 0.40813  | 0.04393  | 0.05207  | -0.30872 | 0.17700  |
| 150 | H6  | PZ  | 0.00000  | 0.00000  | 0.00000  | 0.00000  | 0.00000  |
| 151 | C8  | S   | 0.01591  | -0.00818 | 0.00426  | -0.01745 | -0.05743 |
| 152 | C8  | S   | 0.18458  | -0.11796 | 0.02822  | 0.00926  | -0.13032 |
| 153 | C8  | PX  | -0.17195 | 0.29686  | -0.02368 | -0.02587 | 0.02702  |
| 154 | C8  | PY  | -0.01400 | -0.05992 | 0.00031  | -0.00079 | 0.16730  |
| 155 | C8  | PZ  | 0.00000  | 0.00000  | 0.00000  | 0.00000  | 0.00000  |
| 156 | C8  | S   | -0.71764 | 0.43475  | -0.32034 | 0.60693  | 1.61330  |
| 157 | C8  | PX  | -0.50617 | 1.31217  | -0.10968 | 0.12368  | 0.69720  |
| 158 | C8  | PY  | -1.73495 | 0.76284  | -0.35358 | 0.40581  | -0.21013 |
| 159 | C8  | PZ  | 0.00000  | 0.00000  | 0.00000  | 0.00000  | 0.00000  |
| 160 | C8  | DXX | -0.06496 | -0.30181 | -0.00941 | -0.01876 | -0.07688 |
| 161 | C8  | DYY | -0.05225 | 0.31352  | -0.01803 | 0.03678  | -0.03658 |
| 162 | C8  | DZZ | 0.04092  | 0.00037  | 0.01458  | -0.08174 | -0.25933 |
| 163 | C8  | DXY | -0.40112 | 0.27148  | -0.04179 | -0.03044 | 0.11192  |
| 164 | C8  | DXZ | 0.00000  | 0.00000  | 0.00000  | 0.00000  | 0.00000  |
| 165 | C8  | DYZ | 0.00000  | 0.00000  | 0.00000  | 0.00000  | 0.00000  |
| 166 | H8  | S   | 0.01393  | -0.11391 | 0.00234  | 0.05100  | 0.28861  |
| 167 | H8  | S   | 0.35156  | -0.33190 | 0.11356  | -0.08210 | 0.12656  |
| 168 | H8  | PX  | 0.06404  | 0.15573  | 0.01094  | -0.10225 | -0.40664 |
| 169 | H8  | PY  | -0.13781 | 0.10698  | -0.02612 | 0.00982  | 0.05165  |
| 170 | H8  | PZ  | 0.00000  | 0.00000  | 0.00000  | 0.00000  | 0.00000  |
| 171 | C10 | S   | 0.01404  | 0.01150  | 0.00117  | 0.00795  | 0.09051  |
| 172 | C10 | S   | -0.13216 | -0.05780 | -0.02370 | -0.04316 | -0.50768 |
| 173 | C10 | PX  | -0.32827 | 0.25320  | -0.03935 | -0.05511 | 0.02391  |
| 174 | C10 | PY  | -0.06217 | 0.02034  | 0.00092  | -0.00381 | 0.43752  |
| 175 | C10 | PZ  | 0.00000  | 0.00000  | 0.00000  | 0.00000  | 0.00000  |
| 176 | C10 | S   | -1.08140 | 0.09360  | -0.15098 | 0.01850  | -1.52800 |
| 177 | C10 | PX  | 0.15496  | -0.21926 | 0.07397  | -0.12325 | -0.09125 |
| 178 | C10 | PY  | -0.30492 | -0.03788 | -0.01248 | -0.01434 | -0.28136 |
| 179 | C10 | PZ  | 0.00000  | 0.00000  | 0.00000  | 0.00000  | 0.00000  |
| 180 | C10 | DXX | -0.15078 | 0.03255  | -0.02480 | -0.04691 | -0.58250 |
| 181 | C10 | DYY | 0.02528  | -0.15359 | 0.01632  | -0.00159 | 0.27791  |
| 182 | C10 | DZZ | 0.09754  | 0.09839  | 0.00853  | 0.05495  | 0.55602  |
| 183 | C10 | DXY | 0.11620  | -0.11116 | 0.01072  | 0.04084  | -0.31767 |
| 184 | C10 | DXZ | 0.00000  | 0.00000  | 0.00000  | 0.00000  | 0.00000  |
| 185 | C10 | DYZ | 0.00000  | 0.00000  | 0.00000  | 0.00000  | 0.00000  |
| 186 | H16 | S   | 0.22888  | -0.07290 | 0.01925  | 0.07883  | 0.41186  |

|     |     |     |          |          |          |          |          |
|-----|-----|-----|----------|----------|----------|----------|----------|
| 187 | H16 | S   | 0.14295  | 0.00278  | 0.00464  | 0.07424  | 0.30491  |
| 188 | H16 | PX  | -0.39604 | 0.14283  | -0.04816 | -0.09689 | -0.49024 |
| 189 | H16 | PY  | 0.20695  | -0.10658 | 0.02377  | 0.03975  | 0.35215  |
| 190 | H16 | PZ  | 0.00000  | 0.00000  | 0.00000  | 0.00000  | 0.00000  |
| 191 | H18 | S   | -0.03187 | 0.15554  | 0.00569  | -0.01224 | 0.50952  |
| 192 | H18 | S   | -0.02822 | 0.00979  | 0.02620  | -0.03704 | 0.27717  |
| 193 | H18 | PX  | -0.07806 | 0.19885  | -0.00318 | -0.00928 | 0.45334  |
| 194 | H18 | PY  | -0.12108 | 0.22346  | -0.00765 | 0.00743  | 0.66980  |
| 195 | H18 | PZ  | 0.00000  | 0.00000  | 0.00000  | 0.00000  | 0.00000  |
| 196 | C9  | S   | 0.01042  | -0.00752 | -0.09889 | -0.00163 | -0.00135 |
| 197 | C9  | S   | -0.02925 | 0.06745  | 0.76442  | -0.00249 | 0.00138  |
| 198 | C9  | PX  | 0.03747  | 0.18516  | 0.55603  | -0.09595 | -0.13456 |
| 199 | C9  | PY  | -0.02325 | -0.03751 | 0.16306  | 0.00664  | 0.16491  |
| 200 | C9  | PZ  | 0.00000  | 0.00000  | 0.00000  | 0.00000  | 0.00000  |
| 201 | C9  | S   | -0.05268 | 0.14581  | 0.55897  | 0.10142  | 0.03702  |
| 202 | C9  | PX  | -0.04814 | 0.04195  | 0.40811  | -0.06858 | -0.07105 |
| 203 | C9  | PY  | 0.07221  | -0.02163 | 0.21225  | -0.01767 | 0.11522  |
| 204 | C9  | PZ  | 0.00000  | 0.00000  | 0.00000  | 0.00000  | 0.00000  |
| 205 | C9  | DXX | -0.19540 | -0.31544 | -0.42529 | 0.05183  | 0.06903  |
| 206 | C9  | DYY | 0.07056  | 0.05824  | -0.12481 | 0.03014  | 0.16963  |
| 207 | C9  | DZZ | 0.12344  | 0.24658  | 0.33190  | -0.08737 | -0.21190 |
| 208 | C9  | DXY | 0.15352  | 0.08758  | -0.58926 | 0.04786  | -0.06405 |
| 209 | C9  | DXZ | 0.00000  | 0.00000  | 0.00000  | 0.00000  | 0.00000  |
| 210 | C9  | DYZ | 0.00000  | 0.00000  | 0.00000  | 0.00000  | 0.00000  |
| 211 | H3  | S   | 0.01256  | -0.00159 | -0.26969 | -0.02369 | -0.16659 |
| 212 | H3  | S   | -0.01871 | -0.00113 | -0.30931 | -0.01801 | -0.11839 |
| 213 | H3  | PX  | -0.12717 | -0.14497 | 0.01125  | 0.00095  | 0.01594  |
| 214 | H3  | PY  | -0.06379 | -0.01722 | 0.57637  | 0.02743  | 0.23671  |
| 215 | H3  | PZ  | 0.00000  | 0.00000  | 0.00000  | 0.00000  | 0.00000  |
| 216 | H5  | S   | 0.01601  | -0.08832 | -0.37629 | 0.03258  | 0.08354  |
| 217 | H5  | S   | 0.04728  | -0.06395 | -0.37822 | 0.01138  | 0.04182  |
| 218 | H5  | PX  | 0.07257  | 0.17062  | 0.38718  | -0.03792 | -0.09289 |
| 219 | H5  | PY  | -0.04884 | -0.06392 | -0.16235 | 0.01463  | 0.03369  |
| 220 | H5  | PZ  | 0.09180  | -0.06026 | -0.64438 | 0.04193  | 0.06972  |
| 221 | H7  | S   | 0.01601  | -0.08832 | -0.37629 | 0.03258  | 0.08354  |
| 222 | H7  | S   | 0.04728  | -0.06395 | -0.37822 | 0.01138  | 0.04182  |
| 223 | H7  | PX  | 0.07257  | 0.17062  | 0.38718  | -0.03792 | -0.09289 |
| 224 | H7  | PY  | -0.04884 | -0.06392 | -0.16235 | 0.01463  | 0.03369  |
| 225 | H7  | PZ  | -0.09180 | 0.06026  | 0.64438  | -0.04193 | -0.06972 |

|              |           |           |           |           |           |
|--------------|-----------|-----------|-----------|-----------|-----------|
| MO:          | 206       | 207       | 208       | 209       | 210       |
| Eigenvalues: | 3.78192   | 3.79244   | 3.84127   | 3.87761   | 3.98970   |
| (ev):        | 102.91138 | 103.19748 | 104.52633 | 105.51517 | 108.56519 |

|   |    |    |          |          |          |          |          |
|---|----|----|----------|----------|----------|----------|----------|
|   |    | A  | A        | A        | A        | A        |          |
| 1 | H1 | S  | 0.04729  | 0.00000  | -0.02568 | 0.75223  | 0.03842  |
| 2 | H1 | S  | -0.04375 | 0.00000  | -0.09396 | 0.56436  | -0.07560 |
| 3 | H1 | PX | -0.11510 | 0.00000  | 0.09291  | -0.93001 | -0.09735 |
| 4 | H1 | PY | 0.17433  | 0.00000  | -0.12664 | -0.36155 | 0.09844  |
| 5 | H1 | PZ | 0.00000  | -0.02276 | 0.00000  | 0.00000  | 0.00000  |
| 6 | C1 | S  | 0.01696  | 0.00000  | 0.00546  | 0.07856  | 0.03767  |
| 7 | C1 | S  | 0.02584  | 0.00000  | -0.11078 | -0.43974 | -0.06232 |
| 8 | C1 | PX | -0.13033 | 0.00000  | 0.16523  | -0.52787 | -0.08681 |
| 9 | C1 | PY | 0.17030  | 0.00000  | -0.10709 | -0.18431 | 0.19475  |

|    |    |     |          |          |          |          |          |
|----|----|-----|----------|----------|----------|----------|----------|
| 10 | C1 | PZ  | 0.00000  | 0.00379  | 0.00000  | 0.00000  | 0.00000  |
| 11 | C1 | S   | -0.33049 | 0.00000  | 0.02727  | -1.12745 | -0.84565 |
| 12 | C1 | PX  | 0.36053  | 0.00000  | 0.05360  | -0.40697 | 0.45924  |
| 13 | C1 | PY  | -0.66705 | 0.00000  | -0.09691 | 0.09465  | -0.01387 |
| 14 | C1 | PZ  | 0.00000  | -0.04473 | 0.00000  | 0.00000  | 0.00000  |
| 15 | C1 | DXX | 0.20063  | 0.00000  | -0.13141 | -0.69217 | 0.16165  |
| 16 | C1 | DYY | -0.16759 | 0.00000  | 0.10680  | 0.54936  | -0.11371 |
| 17 | C1 | DZZ | 0.06140  | 0.00000  | 0.04931  | 0.46015  | 0.14254  |
| 18 | C1 | DXY | -0.34421 | 0.00000  | 0.27869  | -0.48140 | -0.29480 |
| 19 | C1 | DXZ | 0.00000  | 0.04292  | 0.00000  | 0.00000  | 0.00000  |
| 20 | C1 | DYZ | 0.00000  | -0.01082 | 0.00000  | 0.00000  | 0.00000  |
| 21 | C2 | S   | -0.00684 | 0.00000  | -0.00633 | 0.05563  | -0.02176 |
| 22 | C2 | S   | -0.04420 | 0.00000  | 0.12274  | -0.28990 | 0.07525  |
| 23 | C2 | PX  | 0.03191  | 0.00000  | -0.07862 | 0.32636  | -0.06188 |
| 24 | C2 | PY  | -0.26505 | 0.00000  | 0.13592  | 0.14317  | -0.10915 |
| 25 | C2 | PZ  | 0.00000  | 0.00026  | 0.00000  | 0.00000  | 0.00000  |
| 26 | C2 | S   | 0.14879  | 0.00000  | -0.00216 | -0.56304 | 0.20857  |
| 27 | C2 | PX  | -0.00750 | 0.00000  | -0.05279 | 0.10474  | -0.04568 |
| 28 | C2 | PY  | 0.61787  | 0.00000  | -0.24098 | 0.09170  | 0.39210  |
| 29 | C2 | PZ  | 0.00000  | 0.01353  | 0.00000  | 0.00000  | 0.00000  |
| 30 | C2 | DXX | 0.23746  | 0.00000  | -0.03464 | -0.36873 | 0.09393  |
| 31 | C2 | DYY | -0.27822 | 0.00000  | 0.09376  | 0.33859  | -0.15664 |
| 32 | C2 | DZZ | -0.00211 | 0.00000  | -0.06809 | 0.32257  | -0.09577 |
| 33 | C2 | DXY | -0.37756 | 0.00000  | 0.30035  | -0.31467 | 0.02762  |
| 34 | C2 | DXZ | 0.00000  | 0.00306  | 0.00000  | 0.00000  | 0.00000  |
| 35 | C2 | DYZ | 0.00000  | 0.00694  | 0.00000  | 0.00000  | 0.00000  |
| 36 | C3 | S   | -0.03406 | 0.00000  | 0.00829  | -0.03121 | -0.08786 |
| 37 | C3 | S   | 0.09045  | 0.00000  | -0.05516 | 0.03048  | 0.17810  |
| 38 | C3 | PX  | 0.21555  | 0.00000  | -0.10083 | -0.00635 | 0.02063  |
| 39 | C3 | PY  | 0.04336  | 0.00000  | -0.03453 | -0.18246 | -0.00068 |
| 40 | C3 | PZ  | 0.00000  | -0.00444 | 0.00000  | 0.00000  | 0.00000  |
| 41 | C3 | S   | 1.16356  | 0.00000  | -0.37156 | 0.64553  | 2.49330  |
| 42 | C3 | PX  | -0.63667 | 0.00000  | 0.01213  | 0.24956  | -0.29754 |
| 43 | C3 | PY  | -1.04549 | 0.00000  | 0.16556  | 0.27177  | -0.71765 |
| 44 | C3 | PZ  | 0.00000  | 0.03084  | 0.00000  | 0.00000  | 0.00000  |
| 45 | C3 | DXX | -0.31491 | 0.00000  | 0.13479  | -0.09564 | -0.51703 |
| 46 | C3 | DYY | 0.32801  | 0.00000  | -0.14464 | 0.04557  | 0.37045  |
| 47 | C3 | DZZ | -0.16996 | 0.00000  | 0.03772  | -0.16649 | -0.39417 |
| 48 | C3 | DXY | -0.16663 | 0.00000  | 0.10350  | -0.28506 | 0.02189  |
| 49 | C3 | DXZ | 0.00000  | -0.00544 | 0.00000  | 0.00000  | 0.00000  |
| 50 | C3 | DYZ | 0.00000  | 0.00605  | 0.00000  | 0.00000  | 0.00000  |
| 51 | C4 | S   | 0.01782  | 0.00000  | 0.01042  | -0.03835 | -0.00276 |
| 52 | C4 | S   | -0.29156 | 0.00000  | -0.06824 | 0.25686  | -0.13951 |
| 53 | C4 | PX  | -0.22311 | 0.00000  | 0.16722  | -0.11911 | -0.08903 |
| 54 | C4 | PY  | -0.01447 | 0.00000  | -0.15586 | 0.08441  | 0.09410  |
| 55 | C4 | PZ  | 0.00000  | -0.02358 | 0.00000  | 0.00000  | 0.00000  |
| 56 | C4 | S   | 0.13151  | 0.00000  | 0.09312  | 0.23315  | 0.56294  |
| 57 | C4 | PX  | 0.78630  | 0.00000  | -0.11947 | 0.23658  | 0.38576  |
| 58 | C4 | PY  | -0.47668 | 0.00000  | 0.01132  | 0.34802  | -0.34398 |
| 59 | C4 | PZ  | 0.00000  | 0.01585  | 0.00000  | 0.00000  | 0.00000  |
| 60 | C4 | DXX | 0.16049  | 0.00000  | 0.00462  | -0.38714 | -0.05322 |
| 61 | C4 | DYY | -0.10402 | 0.00000  | 0.08647  | 0.21303  | 0.04442  |
| 62 | C4 | DZZ | 0.13309  | 0.00000  | 0.02062  | -0.21133 | 0.00865  |
| 63 | C4 | DXY | 0.33953  | 0.00000  | -0.42773 | -0.11679 | 0.20640  |

|     |    |     |          |          |          |          |          |
|-----|----|-----|----------|----------|----------|----------|----------|
| 64  | C4 | DXZ | 0.00000  | 0.03387  | 0.00000  | 0.00000  | 0.00000  |
| 65  | C4 | DYZ | 0.00000  | -0.09218 | 0.00000  | 0.00000  | 0.00000  |
| 66  | C5 | S   | 0.00353  | 0.00000  | 0.01350  | -0.05711 | 0.01481  |
| 67  | C5 | S   | 0.06969  | 0.00000  | -0.13683 | 0.26443  | -0.05527 |
| 68  | C5 | PX  | -0.14079 | 0.00000  | 0.13612  | -0.05548 | 0.02111  |
| 69  | C5 | PY  | -0.18424 | 0.00000  | 0.07632  | 0.21217  | -0.12053 |
| 70  | C5 | PZ  | 0.00000  | 0.00408  | 0.00000  | 0.00000  | 0.00000  |
| 71  | C5 | S   | -0.08536 | 0.00000  | -0.00694 | 0.57427  | -0.38136 |
| 72  | C5 | PX  | 0.36684  | 0.00000  | -0.06941 | 0.04931  | 0.16441  |
| 73  | C5 | PY  | 0.47101  | 0.00000  | -0.21495 | 0.09315  | 0.28421  |
| 74  | C5 | PZ  | 0.00000  | -0.01602 | 0.00000  | 0.00000  | 0.00000  |
| 75  | C5 | DXX | -0.29463 | 0.00000  | 0.29226  | -0.03921 | -0.08136 |
| 76  | C5 | DYY | 0.40371  | 0.00000  | -0.29712 | 0.00568  | 0.08390  |
| 77  | C5 | DZZ | -0.02178 | 0.00000  | 0.09410  | -0.30115 | 0.07367  |
| 78  | C5 | DXY | -0.01983 | 0.00000  | 0.08344  | -0.31659 | 0.19302  |
| 79  | C5 | DXZ | 0.00000  | 0.00036  | 0.00000  | 0.00000  | 0.00000  |
| 80  | C5 | DYZ | 0.00000  | 0.01242  | 0.00000  | 0.00000  | 0.00000  |
| 81  | C6 | S   | 0.01174  | 0.00000  | 0.00114  | -0.01667 | 0.00679  |
| 82  | C6 | S   | -0.03211 | 0.00000  | 0.03766  | 0.06404  | 0.11738  |
| 83  | C6 | PX  | 0.14618  | 0.00000  | -0.09801 | 0.08441  | 0.07618  |
| 84  | C6 | PY  | 0.03218  | 0.00000  | 0.00842  | -0.04223 | 0.07304  |
| 85  | C6 | PZ  | 0.00000  | 0.00129  | 0.00000  | 0.00000  | 0.00000  |
| 86  | C6 | S   | -0.57866 | 0.00000  | -0.03019 | 0.37994  | -0.90544 |
| 87  | C6 | PX  | -0.95566 | 0.00000  | 0.22587  | -0.04892 | -0.83661 |
| 88  | C6 | PY  | -0.13015 | 0.00000  | 0.02429  | -0.09758 | 0.15435  |
| 89  | C6 | PZ  | 0.00000  | -0.01617 | 0.00000  | 0.00000  | 0.00000  |
| 90  | C6 | DXX | 0.16254  | 0.00000  | -0.06380 | -0.08622 | 0.01576  |
| 91  | C6 | DYY | -0.20778 | 0.00000  | 0.08405  | 0.04323  | -0.09684 |
| 92  | C6 | DZZ | 0.05468  | 0.00000  | 0.00455  | -0.08785 | 0.03439  |
| 93  | C6 | DXY | 0.42157  | 0.00000  | -0.21106 | -0.02602 | 0.06040  |
| 94  | C6 | DXZ | 0.00000  | -0.00416 | 0.00000  | 0.00000  | 0.00000  |
| 95  | C6 | DYZ | 0.00000  | -0.00143 | 0.00000  | 0.00000  | 0.00000  |
| 96  | C7 | S   | 0.01627  | 0.00000  | 0.01213  | 0.01764  | 0.12393  |
| 97  | C7 | S   | -0.05967 | 0.00000  | -0.05777 | -0.18601 | -0.52593 |
| 98  | C7 | PX  | 0.10101  | 0.00000  | -0.14480 | 0.04996  | -0.50752 |
| 99  | C7 | PY  | -0.09597 | 0.00000  | 0.05669  | -0.12849 | -0.09881 |
| 100 | C7 | PZ  | 0.00000  | 0.00098  | 0.00000  | 0.00000  | 0.00000  |
| 101 | C7 | S   | -1.01012 | 0.00000  | 0.10279  | -0.23357 | -2.54037 |
| 102 | C7 | PX  | 0.64453  | 0.00000  | -0.19334 | -0.01940 | 0.65015  |
| 103 | C7 | PY  | 0.08204  | 0.00000  | 0.03575  | -0.09894 | -0.08237 |
| 104 | C7 | PZ  | 0.00000  | -0.00900 | 0.00000  | 0.00000  | 0.00000  |
| 105 | C7 | DXX | -0.00673 | 0.00000  | -0.11605 | -0.00446 | -0.73029 |
| 106 | C7 | DYY | -0.08285 | 0.00000  | 0.14599  | 0.00188  | 0.76712  |
| 107 | C7 | DZZ | 0.08711  | 0.00000  | 0.06831  | 0.10202  | 0.65335  |
| 108 | C7 | DXY | 0.24648  | 0.00000  | -0.08236 | 0.14791  | 0.40053  |
| 109 | C7 | DXZ | 0.00000  | -0.00042 | 0.00000  | 0.00000  | 0.00000  |
| 110 | C7 | DYZ | 0.00000  | 0.00065  | 0.00000  | 0.00000  | 0.00000  |
| 111 | O1 | S   | -0.02174 | 0.00000  | 0.03003  | 0.05677  | -0.00424 |
| 112 | O1 | S   | -0.06448 | 0.00000  | 0.01854  | 0.04798  | -0.03224 |
| 113 | O1 | PX  | 0.00361  | 0.00000  | -0.00308 | -0.00381 | 0.00440  |
| 114 | O1 | PY  | -0.00608 | 0.00000  | 0.02153  | 0.05499  | 0.01552  |
| 115 | O1 | PZ  | 0.00000  | -0.01481 | 0.00000  | 0.00000  | 0.00000  |
| 116 | O1 | S   | 0.46037  | 0.00000  | -0.41479 | -0.81581 | 0.16300  |
| 117 | O1 | PX  | -0.19866 | 0.00000  | -0.15781 | 0.06650  | -0.01149 |

|     |     |     |          |          |          |          |          |
|-----|-----|-----|----------|----------|----------|----------|----------|
| 118 | O1  | PY  | -0.17270 | 0.00000  | -0.18847 | 0.23186  | 0.06597  |
| 119 | O1  | PZ  | 0.00000  | 0.06877  | 0.00000  | 0.00000  | 0.00000  |
| 120 | O1  | DXX | -0.11208 | 0.00000  | -0.01397 | 0.25300  | 0.03996  |
| 121 | O1  | DYY | 0.09899  | 0.00000  | 0.18524  | -0.03604 | -0.05822 |
| 122 | O1  | DZZ | -0.13145 | 0.00000  | 0.05067  | 0.21649  | -0.01375 |
| 123 | O1  | DXY | 0.17386  | 0.00000  | -0.32174 | -0.17195 | 0.13234  |
| 124 | O1  | DXZ | 0.00000  | -0.05729 | 0.00000  | 0.00000  | 0.00000  |
| 125 | O1  | DYZ | 0.00000  | -0.14977 | 0.00000  | 0.00000  | 0.00000  |
| 126 | H4  | S   | -0.03565 | 0.00000  | 0.09228  | -0.28875 | 0.13253  |
| 127 | H4  | S   | -0.02751 | 0.00000  | 0.08881  | -0.17269 | 0.04526  |
| 128 | H4  | PX  | -0.17361 | 0.00000  | 0.20173  | -0.31169 | 0.08410  |
| 129 | H4  | PY  | -0.09448 | 0.00000  | 0.01729  | 0.21885  | -0.15207 |
| 130 | H4  | PZ  | 0.00000  | -0.00199 | 0.00000  | 0.00000  | 0.00000  |
| 131 | N1  | S   | 0.03613  | 0.00000  | -0.01552 | 0.00697  | 0.00294  |
| 132 | N1  | S   | -0.02891 | 0.00000  | 0.02441  | -0.06368 | 0.00404  |
| 133 | N1  | PX  | -0.00442 | 0.00000  | -0.00504 | 0.00495  | -0.02371 |
| 134 | N1  | PY  | 0.09936  | 0.00000  | -0.02682 | -0.04401 | 0.05013  |
| 135 | N1  | PZ  | 0.00000  | -0.00040 | 0.00000  | 0.00000  | 0.00000  |
| 136 | N1  | S   | -0.45477 | 0.00000  | 0.21232  | -0.03638 | 0.06202  |
| 137 | N1  | PX  | 0.06841  | 0.00000  | -0.00279 | 0.07758  | 0.00096  |
| 138 | N1  | PY  | 0.05631  | 0.00000  | -0.04246 | -0.12230 | -0.05502 |
| 139 | N1  | PZ  | 0.00000  | 0.00420  | 0.00000  | 0.00000  | 0.00000  |
| 140 | N1  | DXX | 0.07134  | 0.00000  | -0.04745 | 0.08152  | -0.16173 |
| 141 | N1  | DYY | 0.11243  | 0.00000  | -0.03556 | -0.01497 | 0.18733  |
| 142 | N1  | DZZ | 0.11176  | 0.00000  | -0.04451 | 0.01490  | 0.01002  |
| 143 | N1  | DXY | 0.38257  | 0.00000  | -0.16928 | -0.09427 | -0.08285 |
| 144 | N1  | DXZ | 0.00000  | 0.00090  | 0.00000  | 0.00000  | 0.00000  |
| 145 | N1  | DYZ | 0.00000  | 0.00052  | 0.00000  | 0.00000  | 0.00000  |
| 146 | H6  | S   | 0.00939  | 0.00000  | -0.10995 | 0.43963  | -0.08729 |
| 147 | H6  | S   | 0.05698  | 0.00000  | -0.08930 | 0.27649  | -0.04669 |
| 148 | H6  | PX  | 0.06245  | 0.00000  | -0.17682 | 0.57221  | -0.11630 |
| 149 | H6  | PY  | -0.21893 | 0.00000  | 0.08216  | 0.15956  | -0.06658 |
| 150 | H6  | PZ  | 0.00000  | -0.00093 | 0.00000  | 0.00000  | 0.00000  |
| 151 | C8  | S   | -0.02899 | 0.00000  | 0.00185  | 0.00975  | -0.02446 |
| 152 | C8  | S   | -0.20518 | 0.00000  | 0.08719  | -0.03861 | 0.05164  |
| 153 | C8  | PX  | -0.12877 | 0.00000  | 0.04285  | 0.00961  | -0.03294 |
| 154 | C8  | PY  | 0.17401  | 0.00000  | -0.06634 | -0.06549 | -0.21778 |
| 155 | C8  | PZ  | 0.00000  | 0.00006  | 0.00000  | 0.00000  | 0.00000  |
| 156 | C8  | S   | 1.26456  | 0.00000  | -0.25488 | -0.13479 | 0.81944  |
| 157 | C8  | PX  | 0.11475  | 0.00000  | 0.05854  | 0.15057  | 0.22129  |
| 158 | C8  | PY  | -0.04178 | 0.00000  | -0.01010 | 0.02830  | 0.80860  |
| 159 | C8  | PZ  | 0.00000  | 0.00053  | 0.00000  | 0.00000  | 0.00000  |
| 160 | C8  | DXX | 0.24312  | 0.00000  | -0.13852 | -0.07676 | -0.27063 |
| 161 | C8  | DYY | -0.28171 | 0.00000  | 0.13652  | 0.09150  | 0.28297  |
| 162 | C8  | DZZ | -0.12210 | 0.00000  | 0.00125  | 0.03945  | -0.13307 |
| 163 | C8  | DXY | 0.08833  | 0.00000  | -0.05437 | 0.00635  | -0.42037 |
| 164 | C8  | DXZ | 0.00000  | 0.00168  | 0.00000  | 0.00000  | 0.00000  |
| 165 | C8  | DYZ | 0.00000  | -0.00035 | 0.00000  | 0.00000  | 0.00000  |
| 166 | H8  | S   | 0.00072  | 0.00000  | 0.12414  | 0.05181  | 0.73192  |
| 167 | H8  | S   | -0.17716 | 0.00000  | 0.12712  | 0.02112  | 0.24212  |
| 168 | H8  | PX  | -0.02342 | 0.00000  | -0.16475 | -0.05007 | -0.95600 |
| 169 | H8  | PY  | -0.13100 | 0.00000  | 0.06528  | -0.03212 | -0.00717 |
| 170 | H8  | PZ  | 0.00000  | 0.00216  | 0.00000  | 0.00000  | 0.00000  |
| 171 | C10 | S   | 0.06815  | 0.00000  | -0.01885 | -0.00686 | -0.02857 |

|     |     |     |          |          |          |          |          |
|-----|-----|-----|----------|----------|----------|----------|----------|
| 172 | C10 | S   | -0.31628 | 0.00000  | 0.06674  | 0.02482  | 0.02399  |
| 173 | C10 | PX  | -0.08883 | 0.00000  | 0.03634  | -0.08219 | 0.32525  |
| 174 | C10 | PY  | 0.40527  | 0.00000  | -0.14451 | -0.08390 | -0.25392 |
| 175 | C10 | PZ  | 0.00000  | -0.00032 | 0.00000  | 0.00000  | 0.00000  |
| 176 | C10 | S   | -1.00652 | 0.00000  | 0.22597  | 0.09216  | 0.56594  |
| 177 | C10 | PX  | -0.02733 | 0.00000  | 0.00653  | -0.12838 | 0.02184  |
| 178 | C10 | PY  | -0.12520 | 0.00000  | 0.00518  | -0.03403 | 0.08364  |
| 179 | C10 | PZ  | 0.00000  | 0.00037  | 0.00000  | 0.00000  | 0.00000  |
| 180 | C10 | DXX | -0.47623 | 0.00000  | 0.14443  | 0.01262  | 0.38577  |
| 181 | C10 | DYY | 0.38702  | 0.00000  | -0.15028 | -0.01738 | -0.47863 |
| 182 | C10 | DZZ | 0.37661  | 0.00000  | -0.09496 | -0.03491 | -0.12158 |
| 183 | C10 | DXY | -0.20115 | 0.00000  | 0.06051  | 0.15413  | -0.27076 |
| 184 | C10 | DXZ | 0.00000  | 0.00018  | 0.00000  | 0.00000  | 0.00000  |
| 185 | C10 | DYZ | 0.00000  | -0.00032 | 0.00000  | 0.00000  | 0.00000  |
| 186 | H16 | S   | 0.34076  | 0.00000  | -0.09643 | 0.05304  | -0.34964 |
| 187 | H16 | S   | 0.24068  | 0.00000  | -0.07155 | 0.03543  | -0.17729 |
| 188 | H16 | PX  | -0.40442 | 0.00000  | 0.11145  | -0.05872 | 0.41377  |
| 189 | H16 | PY  | 0.30485  | 0.00000  | -0.09193 | -0.01547 | -0.18972 |
| 190 | H16 | PZ  | 0.00000  | -0.00013 | 0.00000  | 0.00000  | 0.00000  |
| 191 | H18 | S   | 0.31086  | 0.00000  | -0.07886 | -0.12254 | 0.09833  |
| 192 | H18 | S   | 0.20822  | 0.00000  | -0.05820 | -0.09852 | 0.00097  |
| 193 | H18 | PX  | 0.23677  | 0.00000  | -0.05342 | -0.10821 | 0.18093  |
| 194 | H18 | PY  | 0.42954  | 0.00000  | -0.11291 | -0.10738 | -0.00558 |
| 195 | H18 | PZ  | 0.00000  | -0.00020 | 0.00000  | 0.00000  | 0.00000  |
| 196 | C9  | S   | 0.00446  | 0.00000  | 0.00489  | 0.00023  | 0.00156  |
| 197 | C9  | S   | -0.05035 | 0.00000  | -0.11121 | 0.01756  | 0.02525  |
| 198 | C9  | PX  | 0.22494  | 0.00000  | 0.22789  | 0.02425  | 0.02421  |
| 199 | C9  | PY  | -0.39396 | 0.00000  | -0.72340 | -0.05344 | 0.06142  |
| 200 | C9  | PZ  | 0.00000  | -0.93616 | 0.00000  | 0.00000  | 0.00000  |
| 201 | C9  | S   | 0.01718  | 0.00000  | 0.20625  | 0.05685  | -0.07997 |
| 202 | C9  | PX  | 0.11032  | 0.00000  | 0.09555  | -0.01239 | 0.01638  |
| 203 | C9  | PY  | -0.32189 | 0.00000  | -0.62238 | 0.07837  | 0.10418  |
| 204 | C9  | PZ  | 0.00000  | -0.55713 | 0.00000  | 0.00000  | 0.00000  |
| 205 | C9  | DXX | 0.06524  | 0.00000  | 0.46152  | 0.10463  | -0.09004 |
| 206 | C9  | DYY | -0.48476 | 0.00000  | -1.01742 | -0.11797 | 0.09306  |
| 207 | C9  | DZZ | 0.42974  | 0.00000  | 0.65516  | 0.02691  | -0.03130 |
| 208 | C9  | DXY | 0.08953  | 0.00000  | 0.10217  | -0.07092 | -0.02453 |
| 209 | C9  | DXZ | 0.00000  | -1.10350 | 0.00000  | 0.00000  | 0.00000  |
| 210 | C9  | DYZ | 0.00000  | 0.49943  | 0.00000  | 0.00000  | 0.00000  |
| 211 | H3  | S   | 0.40557  | 0.00000  | 0.74563  | 0.02812  | -0.06534 |
| 212 | H3  | S   | 0.29232  | 0.00000  | 0.52271  | -0.03563 | -0.06350 |
| 213 | H3  | PX  | 0.04819  | 0.00000  | 0.19897  | 0.05916  | -0.02394 |
| 214 | H3  | PY  | -0.56000 | 0.00000  | -1.00211 | -0.04927 | 0.08310  |
| 215 | H3  | PZ  | 0.00000  | -0.00307 | 0.00000  | 0.00000  | 0.00000  |
| 216 | H5  | S   | -0.19784 | -0.71098 | -0.35269 | -0.01789 | 0.03059  |
| 217 | H5  | S   | -0.10270 | -0.44057 | -0.19370 | -0.05420 | 0.02038  |
| 218 | H5  | PX  | 0.15861  | 0.50274  | 0.20699  | 0.00201  | -0.00728 |
| 219 | H5  | PY  | -0.05918 | -0.25740 | -0.08314 | -0.00525 | 0.00027  |
| 220 | H5  | PZ  | -0.18438 | -0.81389 | -0.35222 | -0.06184 | 0.02568  |
| 221 | H7  | S   | -0.19784 | 0.71098  | -0.35269 | -0.01789 | 0.03059  |
| 222 | H7  | S   | -0.10270 | 0.44057  | -0.19370 | -0.05420 | 0.02038  |
| 223 | H7  | PX  | 0.15861  | -0.50274 | 0.20699  | 0.00201  | -0.00728 |
| 224 | H7  | PY  | -0.05918 | 0.25740  | -0.08314 | -0.00525 | 0.00027  |
| 225 | H7  | PZ  | 0.18438  | -0.81389 | 0.35222  | 0.06184  | -0.02568 |

|              |           |           |           |           |           |
|--------------|-----------|-----------|-----------|-----------|-----------|
| MO:          | 211       | 212       | 213       | 214       | 215       |
| Eigenvalues: | 4.01961   | 4.19924   | 4.46531   | 4.49945   | 4.55630   |
| (ev):        | 109.37924 | 114.26708 | 121.50731 | 122.43635 | 123.98333 |

|    |    | A   | A        | A        | A        | A        |          |
|----|----|-----|----------|----------|----------|----------|----------|
| 1  | H1 | S   | 0.05238  | 0.42060  | -0.06761 | -0.09032 | -0.03515 |
| 2  | H1 | S   | 0.01356  | 0.32660  | -0.14795 | 0.02661  | -0.03198 |
| 3  | H1 | PX  | -0.06556 | -0.43544 | 0.01258  | 0.02020  | 0.00685  |
| 4  | H1 | PY  | -0.01971 | -0.19557 | 0.05414  | -0.01975 | -0.01138 |
| 5  | H1 | PZ  | 0.00000  | 0.00000  | 0.00000  | 0.00000  | 0.00000  |
| 6  | C1 | S   | 0.01999  | 0.04512  | 0.06293  | 0.16187  | 0.03114  |
| 7  | C1 | S   | -0.04619 | -0.27769 | -0.29317 | -1.19692 | -0.17674 |
| 8  | C1 | PX  | -0.05582 | -0.30012 | -0.00676 | 0.11692  | -0.00723 |
| 9  | C1 | PY  | 0.06887  | -0.08434 | 0.10595  | -0.10577 | -0.06703 |
| 10 | C1 | PZ  | 0.00000  | 0.00000  | 0.00000  | 0.00000  | 0.00000  |
| 11 | C1 | S   | -0.37984 | -0.05877 | -0.51838 | 0.08766  | 0.06404  |
| 12 | C1 | PX  | 0.08708  | -0.50947 | 0.61954  | -0.06755 | -0.00018 |
| 13 | C1 | PY  | 0.18770  | 0.13066  | -0.38015 | 0.65409  | 0.33653  |
| 14 | C1 | PZ  | 0.00000  | 0.00000  | 0.00000  | 0.00000  | 0.00000  |
| 15 | C1 | DXX | 0.01559  | -0.40195 | 0.26057  | 0.52667  | 0.07609  |
| 16 | C1 | DYY | 0.02539  | 0.60482  | 0.08740  | 0.72219  | 0.14779  |
| 17 | C1 | DZZ | 0.07429  | 0.21936  | 0.22961  | 0.65584  | 0.13701  |
| 18 | C1 | DXY | -0.10868 | -0.36305 | -0.07794 | 0.04189  | 0.05479  |
| 19 | C1 | DXZ | 0.00000  | 0.00000  | 0.00000  | 0.00000  | 0.00000  |
| 20 | C1 | DYZ | 0.00000  | 0.00000  | 0.00000  | 0.00000  | 0.00000  |
| 21 | C2 | S   | -0.03254 | -0.07363 | 0.11051  | 0.07582  | -0.22201 |
| 22 | C2 | S   | 0.13303  | 0.35253  | -0.74492 | -0.52691 | 1.41148  |
| 23 | C2 | PX  | -0.11047 | -0.32000 | -0.05947 | -0.03800 | 0.10979  |
| 24 | C2 | PY  | -0.12884 | -0.19698 | 0.05785  | -0.06610 | -0.00394 |
| 25 | C2 | PZ  | 0.00000  | 0.00000  | 0.00000  | 0.00000  | 0.00000  |
| 26 | C2 | S   | 0.31091  | 0.57541  | -0.17422 | -0.02858 | 0.81783  |
| 27 | C2 | PX  | 0.05714  | -0.25511 | -0.05617 | 0.07850  | 0.07984  |
| 28 | C2 | PY  | 0.13701  | -0.19040 | 0.05197  | 0.01583  | -0.17378 |
| 29 | C2 | PZ  | 0.00000  | 0.00000  | 0.00000  | 0.00000  | 0.00000  |
| 30 | C2 | DXX | 0.18451  | 0.40217  | 0.41835  | 0.28124  | -0.92516 |
| 31 | C2 | DYY | -0.25284 | -0.70467 | 0.47280  | 0.24147  | -0.83209 |
| 32 | C2 | DZZ | -0.15799 | -0.34741 | 0.43214  | 0.30145  | -0.83647 |
| 33 | C2 | DXY | 0.11911  | 0.49278  | 0.07797  | -0.02098 | -0.13922 |
| 34 | C2 | DXZ | 0.00000  | 0.00000  | 0.00000  | 0.00000  | 0.00000  |
| 35 | C2 | DYZ | 0.00000  | 0.00000  | 0.00000  | 0.00000  | 0.00000  |
| 36 | C3 | S   | -0.03354 | 0.03721  | 0.22553  | 0.01669  | -0.00069 |
| 37 | C3 | S   | -0.09321 | -0.12448 | -1.52284 | -0.16268 | 0.02789  |
| 38 | C3 | PX  | -0.05431 | 0.08836  | 0.03605  | -0.00775 | -0.15385 |
| 39 | C3 | PY  | 0.06655  | -0.16434 | 0.05906  | -0.07350 | 0.10518  |
| 40 | C3 | PZ  | 0.00000  | 0.00000  | 0.00000  | 0.00000  | 0.00000  |
| 41 | C3 | S   | 1.65074  | -0.59460 | -0.22710 | 0.71858  | -0.07820 |
| 42 | C3 | PX  | -0.11892 | 0.47811  | -0.62781 | 0.35906  | 0.86752  |
| 43 | C3 | PY  | -0.33187 | 0.24652  | -0.30534 | -0.29222 | -0.28731 |
| 44 | C3 | PZ  | 0.00000  | 0.00000  | 0.00000  | 0.00000  | 0.00000  |
| 45 | C3 | DXX | -0.16359 | 0.16446  | 0.80085  | 0.09009  | 0.04776  |
| 46 | C3 | DYY | 0.08562  | -0.02752 | 0.93418  | 0.02692  | -0.16576 |
| 47 | C3 | DZZ | -0.12379 | 0.13589  | 0.89966  | 0.06567  | 0.02166  |
| 48 | C3 | DXY | 0.06089  | -0.48724 | -0.02334 | -0.08949 | 0.09120  |

|     |    |     |          |          |          |          |          |
|-----|----|-----|----------|----------|----------|----------|----------|
| 49  | C3 | DXZ | 0.00000  | 0.00000  | 0.00000  | 0.00000  | 0.00000  |
| 50  | C3 | DYZ | 0.00000  | 0.00000  | 0.00000  | 0.00000  | 0.00000  |
| 51  | C4 | S   | 0.00436  | -0.00375 | -0.02745 | 0.24471  | 0.02087  |
| 52  | C4 | S   | -0.10246 | 0.03484  | 0.03021  | -1.68713 | -0.18352 |
| 53  | C4 | PX  | 0.00466  | 0.01836  | -0.04067 | 0.03539  | -0.02618 |
| 54  | C4 | PY  | 0.06286  | 0.15536  | 0.03116  | 0.19308  | 0.00069  |
| 55  | C4 | PZ  | 0.00000  | 0.00000  | 0.00000  | 0.00000  | 0.00000  |
| 56  | C4 | S   | 0.21485  | -0.01328 | 0.91840  | -1.25031 | -0.38393 |
| 57  | C4 | PX  | -0.01885 | -0.20606 | 0.37129  | -0.82026 | -0.41615 |
| 58  | C4 | PY  | -0.09793 | 0.53027  | -0.36590 | -0.91350 | -0.58718 |
| 59  | C4 | PZ  | 0.00000  | 0.00000  | 0.00000  | 0.00000  | 0.00000  |
| 60  | C4 | DXX | -0.09138 | -0.56634 | -0.07325 | 0.83555  | 0.14058  |
| 61  | C4 | DYY | 0.12945  | 0.42866  | -0.08616 | 1.25198  | 0.13297  |
| 62  | C4 | DZZ | 0.01646  | -0.04352 | -0.09662 | 0.97941  | 0.10906  |
| 63  | C4 | DXY | 0.09569  | 0.09651  | 0.05211  | -0.12535 | -0.04021 |
| 64  | C4 | DXZ | 0.00000  | 0.00000  | 0.00000  | 0.00000  | 0.00000  |
| 65  | C4 | DYZ | 0.00000  | 0.00000  | 0.00000  | 0.00000  | 0.00000  |
| 66  | C5 | S   | 0.02315  | 0.03976  | -0.00807 | 0.22534  | -0.06199 |
| 67  | C5 | S   | -0.12148 | -0.17299 | 0.05796  | -1.38566 | 0.61563  |
| 68  | C5 | PX  | 0.07803  | 0.21768  | 0.01758  | -0.08912 | -0.01496 |
| 69  | C5 | PY  | -0.15886 | -0.30873 | 0.05657  | 0.03795  | -0.13449 |
| 70  | C5 | PZ  | 0.00000  | 0.00000  | 0.00000  | 0.00000  | 0.00000  |
| 71  | C5 | S   | -0.41042 | -0.37465 | -0.05383 | -0.99791 | -0.34589 |
| 72  | C5 | PX  | 0.07477  | 0.20863  | -0.05074 | -0.40540 | -0.34855 |
| 73  | C5 | PY  | -0.00342 | -0.26822 | 0.23193  | 0.17674  | 0.23719  |
| 74  | C5 | PZ  | 0.00000  | 0.00000  | 0.00000  | 0.00000  | 0.00000  |
| 75  | C5 | DXX | -0.00571 | 0.11468  | -0.05639 | 0.84479  | -0.32066 |
| 76  | C5 | DYY | 0.05003  | 0.00874  | -0.11059 | 0.90651  | -0.24310 |
| 77  | C5 | DZZ | 0.11939  | 0.20612  | -0.02683 | 0.86193  | -0.24736 |
| 78  | C5 | DXY | 0.32048  | 0.83126  | -0.00444 | -0.12804 | 0.00947  |
| 79  | C5 | DXZ | 0.00000  | 0.00000  | 0.00000  | 0.00000  | 0.00000  |
| 80  | C5 | DYZ | 0.00000  | 0.00000  | 0.00000  | 0.00000  | 0.00000  |
| 81  | C6 | S   | 0.01696  | -0.00645 | 0.18480  | -0.00099 | -0.23363 |
| 82  | C6 | S   | 0.12234  | -0.05298 | -1.09991 | -0.05776 | 1.31616  |
| 83  | C6 | PX  | -0.03291 | -0.03362 | -0.05681 | 0.01765  | -0.05894 |
| 84  | C6 | PY  | -0.09705 | 0.19202  | -0.23172 | -0.03329 | 0.07959  |
| 85  | C6 | PZ  | 0.00000  | 0.00000  | 0.00000  | 0.00000  | 0.00000  |
| 86  | C6 | S   | -0.39371 | 0.13958  | -2.24508 | 0.21419  | 0.28892  |
| 87  | C6 | PX  | -0.49657 | 0.56608  | -0.43436 | 0.04325  | 0.78034  |
| 88  | C6 | PY  | -0.31092 | 0.25014  | 0.97916  | 0.15625  | 0.75503  |
| 89  | C6 | PZ  | 0.00000  | 0.00000  | 0.00000  | 0.00000  | 0.00000  |
| 90  | C6 | DXX | 0.04410  | 0.43170  | 0.58175  | -0.02206 | -0.79131 |
| 91  | C6 | DYY | 0.03900  | -0.39870 | 0.91161  | 0.02741  | -0.96278 |
| 92  | C6 | DZZ | 0.02936  | 0.01322  | 0.72441  | -0.01041 | -0.86131 |
| 93  | C6 | DXY | 0.10864  | -0.20361 | 0.03490  | 0.00351  | -0.05320 |
| 94  | C6 | DXZ | 0.00000  | 0.00000  | 0.00000  | 0.00000  | 0.00000  |
| 95  | C6 | DYZ | 0.00000  | 0.00000  | 0.00000  | 0.00000  | 0.00000  |
| 96  | C7 | S   | 0.07185  | -0.05628 | 0.16091  | -0.00690 | 0.16726  |
| 97  | C7 | S   | -0.29192 | 0.22557  | -1.12748 | 0.14890  | -1.03616 |
| 98  | C7 | PX  | -0.06768 | 0.17838  | 0.09264  | 0.01377  | 0.05661  |
| 99  | C7 | PY  | 0.15070  | -0.19337 | -0.11562 | -0.04993 | 0.08142  |
| 100 | C7 | PZ  | 0.00000  | 0.00000  | 0.00000  | 0.00000  | 0.00000  |
| 101 | C7 | S   | -1.61883 | 0.57561  | -0.22347 | -0.83128 | -0.49679 |
| 102 | C7 | PX  | 0.65247  | -0.08131 | -0.11361 | 0.43866  | 0.04054  |



|     |    |     |          |          |          |          |          |
|-----|----|-----|----------|----------|----------|----------|----------|
| 103 | C7 | PY  | 0.01226  | -0.16872 | 0.39227  | -0.10957 | -0.57377 |
| 104 | C7 | PZ  | 0.00000  | 0.00000  | 0.00000  | 0.00000  | 0.00000  |
| 105 | C7 | DXX | -0.24434 | 0.17728  | 0.67985  | -0.06044 | 0.76859  |
| 106 | C7 | DYY | 0.30826  | -0.44821 | 0.56582  | -0.11399 | 0.61964  |
| 107 | C7 | DZZ | 0.32297  | -0.23907 | 0.64082  | -0.03516 | 0.61664  |
| 108 | C7 | DXY | -0.19324 | 0.11906  | 0.07442  | 0.01787  | -0.15719 |
| 109 | C7 | DXZ | 0.00000  | 0.00000  | 0.00000  | 0.00000  | 0.00000  |
| 110 | C7 | DYZ | 0.00000  | 0.00000  | 0.00000  | 0.00000  | 0.00000  |
| 111 | O1 | S   | 0.00788  | 0.04304  | 0.02189  | -0.30999 | -0.14067 |
| 112 | O1 | S   | -0.03432 | -0.02952 | 0.01443  | -0.29474 | -0.14924 |
| 113 | O1 | PX  | 0.00129  | -0.01209 | 0.01159  | -0.10694 | -0.04640 |
| 114 | O1 | PY  | 0.02632  | 0.09279  | -0.00872 | 0.16350  | 0.04107  |
| 115 | O1 | PZ  | 0.00000  | 0.00000  | 0.00000  | 0.00000  | 0.00000  |
| 116 | O1 | S   | 0.00284  | -0.56689 | -0.21340 | 3.76790  | 1.80192  |
| 117 | O1 | PX  | 0.03887  | 0.18628  | -0.08698 | 0.53648  | 0.22410  |
| 118 | O1 | PY  | 0.07617  | 0.33040  | 0.02472  | -0.23892 | -0.23820 |
| 119 | O1 | PZ  | 0.00000  | 0.00000  | 0.00000  | 0.00000  | 0.00000  |
| 120 | O1 | DXX | 0.08159  | 0.29480  | 0.07141  | -0.94077 | -0.45566 |
| 121 | O1 | DYY | -0.04544 | -0.11730 | 0.07566  | -1.21863 | -0.44666 |
| 122 | O1 | DZZ | 0.02575  | 0.12811  | 0.07856  | -1.04829 | -0.48461 |
| 123 | O1 | DXY | 0.06685  | 0.02756  | 0.02196  | -0.06374 | -0.03226 |
| 124 | O1 | DXZ | 0.00000  | 0.00000  | 0.00000  | 0.00000  | 0.00000  |
| 125 | O1 | DYZ | 0.00000  | 0.00000  | 0.00000  | 0.00000  | 0.00000  |
| 126 | H4 | S   | 0.22385  | 0.50903  | 0.00094  | -0.20086 | 0.02974  |
| 127 | H4 | S   | 0.13849  | 0.29796  | -0.07197 | -0.03274 | -0.18423 |
| 128 | H4 | PX  | 0.18874  | 0.41591  | 0.00861  | -0.10504 | 0.03014  |
| 129 | H4 | PY  | -0.19603 | -0.37822 | -0.02558 | 0.13864  | -0.00134 |
| 130 | H4 | PZ  | 0.00000  | 0.00000  | 0.00000  | 0.00000  | 0.00000  |
| 131 | N1 | S   | -0.01223 | 0.00140  | -0.34702 | 0.02680  | -0.06725 |
| 132 | N1 | S   | 0.10594  | 0.13094  | 0.28687  | -0.04322 | 0.09092  |
| 133 | N1 | PX  | 0.11167  | -0.02741 | -0.15981 | 0.01099  | -0.06525 |
| 134 | N1 | PY  | -0.03901 | 0.18457  | -0.20052 | -0.00132 | 0.12438  |
| 135 | N1 | PZ  | 0.00000  | 0.00000  | 0.00000  | 0.00000  | 0.00000  |
| 136 | N1 | S   | -0.05925 | -0.04821 | 4.42827  | -0.25263 | 1.06290  |
| 137 | N1 | PX  | 0.26939  | -0.29924 | 0.86802  | -0.10374 | -0.14208 |
| 138 | N1 | PY  | -0.36115 | 0.31523  | 0.54607  | -0.04736 | 0.60450  |
| 139 | N1 | PZ  | 0.00000  | 0.00000  | 0.00000  | 0.00000  | 0.00000  |
| 140 | N1 | DXX | 0.23748  | -0.20333 | -1.04354 | 0.08676  | -0.36600 |
| 141 | N1 | DYY | -0.24407 | 0.22959  | -1.16156 | 0.07326  | -0.01533 |
| 142 | N1 | DZZ | -0.02881 | 0.00515  | -1.10089 | 0.09095  | -0.21733 |
| 143 | N1 | DXY | 0.00259  | 0.06411  | 0.02702  | -0.02515 | 0.07938  |
| 144 | N1 | DXZ | 0.00000  | 0.00000  | 0.00000  | 0.00000  | 0.00000  |
| 145 | N1 | DYZ | 0.00000  | 0.00000  | 0.00000  | 0.00000  | 0.00000  |
| 146 | H6 | S   | -0.18256 | -0.50238 | -0.08590 | -0.02774 | 0.18270  |
| 147 | H6 | S   | -0.05331 | -0.30603 | 0.03516  | 0.05986  | -0.14565 |
| 148 | H6 | PX  | -0.22448 | -0.53618 | -0.05925 | -0.01748 | 0.15721  |
| 149 | H6 | PY  | -0.06795 | -0.14587 | -0.02667 | 0.01034  | 0.03025  |
| 150 | H6 | PZ  | 0.00000  | 0.00000  | 0.00000  | 0.00000  | 0.00000  |
| 151 | C8 | S   | -0.02125 | 0.00373  | 0.05600  | -0.01328 | 0.22719  |
| 152 | C8 | S   | 0.00917  | 0.00839  | -0.47320 | 0.03205  | -1.40937 |
| 153 | C8 | PX  | 0.02347  | -0.05968 | -0.12728 | 0.01893  | -0.05201 |
| 154 | C8 | PY  | -0.06597 | 0.05703  | 0.01759  | -0.00490 | 0.05432  |
| 155 | C8 | PZ  | 0.00000  | 0.00000  | 0.00000  | 0.00000  | 0.00000  |
| 156 | C8 | S   | 0.46260  | -0.03588 | -0.80560 | 0.42349  | -0.77918 |

|     |     |     |          |          |          |          |          |
|-----|-----|-----|----------|----------|----------|----------|----------|
| 157 | C8  | PX  | 0.59320  | -0.38131 | 1.01949  | 0.04977  | -0.39607 |
| 158 | C8  | PY  | 0.63985  | -0.05400 | -0.40167 | 0.32567  | -0.31359 |
| 159 | C8  | PZ  | 0.00000  | 0.00000  | 0.00000  | 0.00000  | 0.00000  |
| 160 | C8  | DXX | -0.34037 | 0.20348  | 0.36855  | -0.04595 | 0.93621  |
| 161 | C8  | DYY | 0.31135  | -0.17232 | 0.14782  | -0.01243 | 0.81223  |
| 162 | C8  | DZZ | -0.08884 | 0.01366  | 0.26245  | -0.04932 | 0.87388  |
| 163 | C8  | DXY | 0.54789  | -0.12296 | -0.11313 | 0.01978  | -0.07895 |
| 164 | C8  | DXZ | 0.00000  | 0.00000  | 0.00000  | 0.00000  | 0.00000  |
| 165 | C8  | DYZ | 0.00000  | 0.00000  | 0.00000  | 0.00000  | 0.00000  |
| 166 | H8  | S   | 0.21110  | -0.21033 | -0.10048 | -0.00764 | -0.17952 |
| 167 | H8  | S   | -0.04600 | -0.11455 | 0.13187  | -0.11605 | 0.04454  |
| 168 | H8  | PX  | -0.27900 | 0.24804  | 0.08306  | -0.00346 | 0.16293  |
| 169 | H8  | PY  | 0.11133  | -0.05603 | -0.03499 | -0.00304 | 0.06147  |
| 170 | H8  | PZ  | 0.00000  | 0.00000  | 0.00000  | 0.00000  | 0.00000  |
| 171 | C10 | S   | 0.00273  | 0.00251  | 0.06266  | -0.00949 | 0.14411  |
| 172 | C10 | S   | -0.02826 | 0.01936  | -0.37344 | 0.07356  | -1.03245 |
| 173 | C10 | PX  | -0.66643 | 0.09712  | 0.00442  | 0.00573  | 0.03998  |
| 174 | C10 | PY  | -0.20270 | 0.09686  | 0.00485  | 0.00441  | -0.13293 |
| 175 | C10 | PZ  | 0.00000  | 0.00000  | 0.00000  | 0.00000  | 0.00000  |
| 176 | C10 | S   | 0.22659  | -0.00831 | -0.41056 | 0.11917  | -0.32244 |
| 177 | C10 | PX  | -0.63937 | 0.12325  | -0.21821 | -0.08952 | 0.11720  |
| 178 | C10 | PY  | -0.08717 | 0.05896  | -0.15835 | 0.00267  | 0.07726  |
| 179 | C10 | PZ  | 0.00000  | 0.00000  | 0.00000  | 0.00000  | 0.00000  |
| 180 | C10 | DXX | -0.35242 | 0.03256  | 0.23775  | -0.04356 | 0.66984  |
| 181 | C10 | DYY | 0.35324  | -0.01470 | 0.22984  | -0.04810 | 0.55412  |
| 182 | C10 | DZZ | 0.02019  | 0.00544  | 0.25101  | -0.03585 | 0.54174  |
| 183 | C10 | DXY | 1.13664  | -0.24974 | -0.08317 | 0.00231  | 0.00663  |
| 184 | C10 | DXZ | 0.00000  | 0.00000  | 0.00000  | 0.00000  | 0.00000  |
| 185 | C10 | DYZ | 0.00000  | 0.00000  | 0.00000  | 0.00000  | 0.00000  |
| 186 | H16 | S   | 0.64166  | -0.10022 | -0.02476 | 0.01855  | -0.12642 |
| 187 | H16 | S   | 0.33609  | -0.03704 | 0.10428  | 0.02219  | 0.04429  |
| 188 | H16 | PX  | -0.74491 | 0.11376  | 0.04591  | -0.00619 | 0.09459  |
| 189 | H16 | PY  | 0.08201  | 0.01810  | 0.00859  | 0.00260  | -0.01655 |
| 190 | H16 | PZ  | 0.00000  | 0.00000  | 0.00000  | 0.00000  | 0.00000  |
| 191 | H18 | S   | -0.68099 | 0.13862  | 0.00024  | -0.00378 | -0.09496 |
| 192 | H18 | S   | -0.37589 | 0.08352  | -0.04942 | -0.03903 | 0.15639  |
| 193 | H18 | PX  | -0.67291 | 0.13016  | -0.00405 | 0.00329  | -0.05655 |
| 194 | H18 | PY  | -0.42637 | 0.08859  | 0.02605  | 0.00426  | -0.04170 |
| 195 | H18 | PZ  | 0.00000  | 0.00000  | 0.00000  | 0.00000  | 0.00000  |
| 196 | C9  | S   | 0.00292  | 0.01130  | 0.00487  | -0.07958 | -0.02992 |
| 197 | C9  | S   | -0.00740 | -0.08705 | -0.03635 | 0.45887  | 0.17939  |
| 198 | C9  | PX  | 0.02418  | 0.06893  | 0.00023  | -0.03155 | -0.01291 |
| 199 | C9  | PY  | 0.04680  | 0.07240  | 0.00125  | 0.05252  | 0.00922  |
| 200 | C9  | PZ  | 0.00000  | 0.00000  | 0.00000  | 0.00000  | 0.00000  |
| 201 | C9  | S   | -0.05380 | -0.10988 | 0.06452  | -0.56474 | -0.24850 |
| 202 | C9  | PX  | 0.00913  | 0.04618  | -0.01730 | 0.26417  | 0.09877  |
| 203 | C9  | PY  | 0.07192  | 0.09396  | -0.03955 | 0.06331  | 0.04008  |
| 204 | C9  | PZ  | 0.00000  | 0.00000  | 0.00000  | 0.00000  | 0.00000  |
| 205 | C9  | DXX | -0.04568 | -0.00834 | 0.00288  | -0.16729 | -0.05081 |
| 206 | C9  | DYY | 0.06795  | 0.09321  | 0.02603  | -0.31244 | -0.13468 |
| 207 | C9  | DZZ | -0.01609 | 0.02582  | 0.02905  | -0.43285 | -0.15698 |
| 208 | C9  | DXY | -0.03038 | -0.09392 | -0.00212 | 0.04006  | 0.02405  |
| 209 | C9  | DXZ | 0.00000  | 0.00000  | 0.00000  | 0.00000  | 0.00000  |
| 210 | C9  | DYZ | 0.00000  | 0.00000  | 0.00000  | 0.00000  | 0.00000  |

|     |    |    |          |          |          |          |          |
|-----|----|----|----------|----------|----------|----------|----------|
| 211 | H3 | S  | -0.04774 | -0.06284 | -0.00650 | 0.10588  | 0.05090  |
| 212 | H3 | S  | -0.04305 | -0.04268 | 0.00993  | 0.03247  | 0.01716  |
| 213 | H3 | PX | -0.00914 | 0.01227  | -0.00402 | 0.04407  | 0.01424  |
| 214 | H3 | PY | 0.05857  | 0.07393  | 0.00370  | -0.02470 | -0.02433 |
| 215 | H3 | PZ | 0.00000  | 0.00000  | 0.00000  | 0.00000  | 0.00000  |
| 216 | H5 | S  | 0.02019  | 0.01318  | -0.01453 | 0.12670  | 0.04988  |
| 217 | H5 | S  | 0.01100  | -0.00880 | 0.00125  | 0.03032  | 0.01902  |
| 218 | H5 | PX | -0.00938 | -0.01180 | 0.00432  | -0.07579 | -0.02415 |
| 219 | H5 | PY | 0.00234  | 0.00417  | -0.00085 | 0.02840  | 0.00543  |
| 220 | H5 | PZ | 0.01291  | -0.01067 | -0.00189 | 0.05548  | 0.02051  |
| 221 | H7 | S  | 0.02019  | 0.01318  | -0.01453 | 0.12670  | 0.04988  |
| 222 | H7 | S  | 0.01100  | -0.00880 | 0.00125  | 0.03032  | 0.01902  |
| 223 | H7 | PX | -0.00938 | -0.01180 | 0.00432  | -0.07579 | -0.02415 |
| 224 | H7 | PY | 0.00234  | 0.00417  | -0.00085 | 0.02840  | 0.00543  |
| 225 | H7 | PZ | -0.01291 | 0.01067  | 0.00189  | -0.05548 | -0.02051 |

|              |           |           |           |           |           |
|--------------|-----------|-----------|-----------|-----------|-----------|
| MO:          | 216       | 217       | 218       | 219       | 220       |
| Eigenvalues: | 4.59956   | 4.67304   | 4.70236   | 4.83284   | 4.88374   |
| (ev):        | 125.16054 | 127.15986 | 127.95773 | 131.50831 | 132.89343 |

|    |    | A   | A        | A        | A        | A        |          |
|----|----|-----|----------|----------|----------|----------|----------|
| 1  | H1 | S   | -0.23702 | -0.16601 | -0.10093 | 0.07080  | -0.21583 |
| 2  | H1 | S   | -0.00931 | 0.29199  | 0.00026  | 0.05627  | -0.00724 |
| 3  | H1 | PX  | 0.17444  | 0.20987  | 0.07876  | -0.04839 | 0.20319  |
| 4  | H1 | PY  | 0.09700  | 0.09270  | 0.02133  | -0.05525 | 0.06766  |
| 5  | H1 | PZ  | 0.00000  | 0.00000  | 0.00000  | 0.00000  | 0.00000  |
| 6  | C1 | S   | 0.22343  | 0.16795  | 0.12073  | -0.05839 | 0.22856  |
| 7  | C1 | S   | -1.42321 | -1.13744 | -0.70925 | 0.25662  | -1.27556 |
| 8  | C1 | PX  | 0.04287  | 0.08541  | 0.02106  | 0.02478  | -0.00735 |
| 9  | C1 | PY  | 0.11549  | 0.13744  | -0.00654 | -0.03635 | -0.07733 |
| 10 | C1 | PZ  | 0.00000  | 0.00000  | 0.00000  | 0.00000  | 0.00000  |
| 11 | C1 | S   | -0.31807 | -0.43618 | -0.53642 | 0.57502  | -1.72029 |
| 12 | C1 | PX  | 0.28932  | -0.39508 | 0.16287  | -0.37658 | 0.51530  |
| 13 | C1 | PY  | -0.22476 | -0.59465 | 0.25951  | 0.22574  | 0.17688  |
| 14 | C1 | PZ  | 0.00000  | 0.00000  | 0.00000  | 0.00000  | 0.00000  |
| 15 | C1 | DXX | 1.08640  | 0.95993  | 0.52779  | -0.29664 | 1.05935  |
| 16 | C1 | DYY | 0.76041  | 0.58369  | 0.46883  | -0.14959 | 1.03708  |
| 17 | C1 | DZZ | 0.84655  | 0.59650  | 0.46004  | -0.20455 | 0.82433  |
| 18 | C1 | DXY | -0.02205 | 0.06129  | -0.00314 | 0.03661  | 0.08725  |
| 19 | C1 | DXZ | 0.00000  | 0.00000  | 0.00000  | 0.00000  | 0.00000  |
| 20 | C1 | DYZ | 0.00000  | 0.00000  | 0.00000  | 0.00000  | 0.00000  |
| 21 | C2 | S   | -0.18761 | 0.07713  | -0.01431 | 0.05594  | 0.20479  |
| 22 | C2 | S   | 1.22312  | -0.52336 | 0.19327  | -0.31505 | -1.15705 |
| 23 | C2 | PX  | 0.03966  | -0.06708 | -0.01033 | -0.06408 | 0.02110  |
| 24 | C2 | PY  | 0.09869  | -0.08269 | 0.15160  | 0.13203  | 0.07154  |
| 25 | C2 | PZ  | 0.00000  | 0.00000  | 0.00000  | 0.00000  | 0.00000  |
| 26 | C2 | S   | 0.32372  | -0.48718 | -0.35597 | 0.27026  | -1.45564 |
| 27 | C2 | PX  | 0.16691  | -0.07137 | -0.13398 | 0.25138  | -0.55155 |
| 28 | C2 | PY  | 0.25386  | 0.30870  | -0.02369 | 0.30788  | -0.44133 |
| 29 | C2 | PZ  | 0.00000  | 0.00000  | 0.00000  | 0.00000  | 0.00000  |
| 30 | C2 | DXX | -0.84693 | 0.35837  | -0.12992 | 0.28969  | 0.99797  |
| 31 | C2 | DYY | -0.67837 | 0.27481  | 0.00005  | 0.26367  | 0.96904  |
| 32 | C2 | DZZ | -0.72659 | 0.27167  | -0.07066 | 0.18168  | 0.72728  |
| 33 | C2 | DXY | -0.03247 | 0.03215  | 0.08250  | 0.19464  | 0.05129  |

|    |    |     |          |          |          |          |          |
|----|----|-----|----------|----------|----------|----------|----------|
| 34 | C2 | DXZ | 0.00000  | 0.00000  | 0.00000  | 0.00000  | 0.00000  |
| 35 | C2 | DYZ | 0.00000  | 0.00000  | 0.00000  | 0.00000  | 0.00000  |
| 36 | C3 | S   | 0.20885  | 0.10994  | -0.05899 | -0.07183 | -0.19306 |
| 37 | C3 | S   | -1.33722 | -0.70541 | 0.38799  | 0.39964  | 1.21808  |
| 38 | C3 | PX  | 0.00214  | 0.00140  | 0.08414  | 0.01702  | -0.05621 |
| 39 | C3 | PY  | -0.07103 | -0.09750 | -0.14352 | 0.07309  | -0.02630 |
| 40 | C3 | PZ  | 0.00000  | 0.00000  | 0.00000  | 0.00000  | 0.00000  |
| 41 | C3 | S   | 0.03445  | -0.68501 | 0.83563  | 1.09511  | 0.45288  |
| 42 | C3 | PX  | -0.43950 | -0.04198 | -0.12515 | 0.12894  | 0.02863  |
| 43 | C3 | PY  | -0.57256 | 0.50408  | -0.07284 | -0.03955 | 0.48535  |
| 44 | C3 | PZ  | 0.00000  | 0.00000  | 0.00000  | 0.00000  | 0.00000  |
| 45 | C3 | DXX | 0.86781  | 0.45049  | -0.27904 | -0.34939 | -0.74893 |
| 46 | C3 | DYY | 0.83977  | 0.37835  | -0.13241 | -0.36148 | -1.06712 |
| 47 | C3 | DZZ | 0.80893  | 0.40979  | -0.23002 | -0.26199 | -0.70670 |
| 48 | C3 | DXY | -0.03639 | 0.00383  | -0.09388 | -0.04419 | 0.05390  |
| 49 | C3 | DXZ | 0.00000  | 0.00000  | 0.00000  | 0.00000  | 0.00000  |
| 50 | C3 | DYZ | 0.00000  | 0.00000  | 0.00000  | 0.00000  | 0.00000  |
| 51 | C4 | S   | 0.00572  | 0.04456  | 0.02070  | 0.06792  | -0.02227 |
| 52 | C4 | S   | -0.14780 | -0.13260 | -0.20119 | -0.34050 | 0.03381  |
| 53 | C4 | PX  | -0.15404 | -0.04261 | -0.09216 | 0.03161  | -0.13913 |
| 54 | C4 | PY  | 0.05650  | 0.05701  | 0.02844  | -0.01560 | 0.03527  |
| 55 | C4 | PZ  | 0.00000  | 0.00000  | 0.00000  | 0.00000  | 0.00000  |
| 56 | C4 | S   | 0.03088  | 0.59373  | -0.37235 | -1.08016 | 0.45110  |
| 57 | C4 | PX  | 0.12397  | 0.66453  | -0.06212 | -0.43289 | 0.39796  |
| 58 | C4 | PY  | -0.25562 | 1.65213  | -0.34641 | -0.00526 | -0.21974 |
| 59 | C4 | PZ  | 0.00000  | 0.00000  | 0.00000  | 0.00000  | 0.00000  |
| 60 | C4 | DXX | 0.11257  | 0.08827  | 0.16020  | 0.33976  | -0.05545 |
| 61 | C4 | DYY | -0.07709 | 0.00284  | 0.05980  | 0.28043  | -0.15458 |
| 62 | C4 | DZZ | 0.04840  | 0.11247  | 0.09640  | 0.24084  | -0.05926 |
| 63 | C4 | DXY | 0.10032  | 0.11719  | 0.04748  | -0.02110 | 0.10537  |
| 64 | C4 | DXZ | 0.00000  | 0.00000  | 0.00000  | 0.00000  | 0.00000  |
| 65 | C4 | DYZ | 0.00000  | 0.00000  | 0.00000  | 0.00000  | 0.00000  |
| 66 | C5 | S   | -0.19065 | 0.05662  | -0.17808 | -0.16842 | -0.14296 |
| 67 | C5 | S   | 1.17305  | -0.64774 | 1.09261  | 0.95383  | 0.85926  |
| 68 | C5 | PX  | -0.03799 | -0.06620 | 0.01437  | 0.01512  | 0.08417  |
| 69 | C5 | PY  | -0.06423 | 0.07587  | -0.00255 | 0.04020  | 0.08751  |
| 70 | C5 | PZ  | 0.00000  | 0.00000  | 0.00000  | 0.00000  | 0.00000  |
| 71 | C5 | S   | 0.37235  | 0.53776  | 0.66316  | 0.26837  | 1.27344  |
| 72 | C5 | PX  | 0.15225  | 0.71391  | 0.08389  | 0.26824  | 0.07745  |
| 73 | C5 | PY  | 0.01208  | -0.49611 | -0.08170 | -0.03103 | -0.30875 |
| 74 | C5 | PZ  | 0.00000  | 0.00000  | 0.00000  | 0.00000  | 0.00000  |
| 75 | C5 | DXX | -0.76796 | 0.32649  | -0.75137 | -0.71027 | -0.63589 |
| 76 | C5 | DYY | -0.72151 | 0.36161  | -0.81222 | -0.81735 | -0.82197 |
| 77 | C5 | DZZ | -0.73849 | 0.20112  | -0.65903 | -0.61452 | -0.48817 |
| 78 | C5 | DXY | -0.01368 | -0.08543 | 0.02731  | 0.05786  | 0.05804  |
| 79 | C5 | DXZ | 0.00000  | 0.00000  | 0.00000  | 0.00000  | 0.00000  |
| 80 | C5 | DYZ | 0.00000  | 0.00000  | 0.00000  | 0.00000  | 0.00000  |
| 81 | C6 | S   | 0.00981  | 0.00425  | 0.13073  | 0.17498  | -0.11369 |
| 82 | C6 | S   | 0.07306  | -0.10131 | -0.71158 | -1.01782 | 0.59394  |
| 83 | C6 | PX  | -0.09500 | 0.01025  | 0.01927  | 0.04688  | 0.07034  |
| 84 | C6 | PY  | 0.02477  | 0.04576  | -0.04893 | 0.00192  | -0.02914 |
| 85 | C6 | PZ  | 0.00000  | 0.00000  | 0.00000  | 0.00000  | 0.00000  |
| 86 | C6 | S   | 0.00910  | 2.45219  | -0.78808 | 0.92326  | -0.28447 |
| 87 | C6 | PX  | -0.60903 | 0.07322  | -0.47914 | -0.05260 | 0.21694  |

|     |    |     |          |          |          |          |          |
|-----|----|-----|----------|----------|----------|----------|----------|
| 88  | C6 | PY  | -0.44221 | -1.42148 | 0.20905  | -1.71882 | 1.01258  |
| 89  | C6 | PZ  | 0.00000  | 0.00000  | 0.00000  | 0.00000  | 0.00000  |
| 90  | C6 | DXX | -0.10104 | -0.02436 | 0.50674  | 0.76345  | -0.36687 |
| 91  | C6 | DYY | 0.05670  | -0.04021 | 0.60112  | 0.74290  | -0.55509 |
| 92  | C6 | DZZ | 0.01018  | -0.00805 | 0.48072  | 0.61777  | -0.38834 |
| 93  | C6 | DXY | -0.09288 | -0.07837 | 0.00757  | -0.02720 | 0.13663  |
| 94  | C6 | DXZ | 0.00000  | 0.00000  | 0.00000  | 0.00000  | 0.00000  |
| 95  | C6 | DYZ | 0.00000  | 0.00000  | 0.00000  | 0.00000  | 0.00000  |
| 96  | C7 | S   | 0.00870  | 0.03577  | -0.25576 | 0.10037  | -0.01818 |
| 97  | C7 | S   | -0.00776 | -0.26321 | 1.63117  | -0.46407 | 0.09228  |
| 98  | C7 | PX  | 0.03972  | 0.04914  | -0.07919 | 0.03125  | -0.04857 |
| 99  | C7 | PY  | -0.15294 | 0.05404  | -0.00790 | 0.09633  | 0.14459  |
| 100 | C7 | PZ  | 0.00000  | 0.00000  | 0.00000  | 0.00000  | 0.00000  |
| 101 | C7 | S   | -0.77910 | 0.51992  | 0.40229  | -0.88280 | 0.78622  |
| 102 | C7 | PX  | 0.54319  | 0.40822  | 0.00630  | 0.73908  | -0.63494 |
| 103 | C7 | PY  | 0.33380  | -0.28523 | -0.00463 | -0.35477 | -0.00600 |
| 104 | C7 | PZ  | 0.00000  | 0.00000  | 0.00000  | 0.00000  | 0.00000  |
| 105 | C7 | DXX | -0.02747 | 0.11113  | -1.27872 | 0.43726  | 0.04081  |
| 106 | C7 | DYY | -0.03741 | 0.12216  | -0.99848 | 0.31940  | -0.02053 |
| 107 | C7 | DZZ | 0.03235  | 0.12498  | -0.95394 | 0.35207  | -0.08335 |
| 108 | C7 | DXY | 0.13214  | -0.07160 | 0.06478  | -0.14025 | -0.17312 |
| 109 | C7 | DXZ | 0.00000  | 0.00000  | 0.00000  | 0.00000  | 0.00000  |
| 110 | C7 | DYZ | 0.00000  | 0.00000  | 0.00000  | 0.00000  | 0.00000  |
| 111 | O1 | S   | -0.02841 | 0.30629  | -0.06192 | -0.00959 | -0.00992 |
| 112 | O1 | S   | -0.03270 | 0.42378  | -0.08973 | -0.08976 | 0.01571  |
| 113 | O1 | PX  | -0.00639 | 0.08651  | -0.01317 | 0.01191  | -0.00203 |
| 114 | O1 | PY  | 0.00046  | -0.09221 | 0.02333  | 0.04070  | -0.01514 |
| 115 | O1 | PZ  | 0.00000  | 0.00000  | 0.00000  | 0.00000  | 0.00000  |
| 116 | O1 | S   | 0.38070  | -4.23414 | 0.86931  | 0.22036  | 0.14587  |
| 117 | O1 | PX  | -0.02031 | -0.44584 | 0.07920  | 0.24429  | -0.15917 |
| 118 | O1 | PY  | -0.13779 | 0.66237  | -0.16846 | -0.01482 | -0.09894 |
| 119 | O1 | PZ  | 0.00000  | 0.00000  | 0.00000  | 0.00000  | 0.00000  |
| 120 | O1 | DXX | -0.12156 | 0.96785  | -0.19648 | 0.13243  | -0.12787 |
| 121 | O1 | DYY | -0.03260 | 0.91864  | -0.17521 | -0.04367 | 0.00664  |
| 122 | O1 | DZZ | -0.10487 | 1.06392  | -0.21504 | -0.06098 | -0.02019 |
| 123 | O1 | DXY | -0.00791 | 0.02024  | -0.00147 | 0.07985  | -0.03983 |
| 124 | O1 | DXZ | 0.00000  | 0.00000  | 0.00000  | 0.00000  | 0.00000  |
| 125 | O1 | DYZ | 0.00000  | 0.00000  | 0.00000  | 0.00000  | 0.00000  |
| 126 | H4 | S   | 0.11225  | -0.05519 | 0.14563  | 0.17913  | 0.16749  |
| 127 | H4 | S   | -0.05679 | 0.35752  | -0.07228 | 0.04499  | -0.04546 |
| 128 | H4 | PX  | 0.06183  | -0.07908 | 0.10623  | 0.12439  | 0.13782  |
| 129 | H4 | PY  | -0.04155 | 0.03928  | -0.08104 | -0.12226 | -0.11381 |
| 130 | H4 | PZ  | 0.00000  | 0.00000  | 0.00000  | 0.00000  | 0.00000  |
| 131 | N1 | S   | 0.08354  | 0.32783  | -0.05731 | 0.19385  | -0.14160 |
| 132 | N1 | S   | -0.09199 | -0.05407 | 0.01567  | 0.16417  | 0.03845  |
| 133 | N1 | PX  | 0.05388  | 0.05722  | -0.02078 | -0.01759 | -0.05427 |
| 134 | N1 | PY  | 0.00816  | 0.09429  | -0.08550 | -0.03305 | 0.04110  |
| 135 | N1 | PZ  | 0.00000  | 0.00000  | 0.00000  | 0.00000  | 0.00000  |
| 136 | N1 | S   | -1.11517 | -5.37241 | 0.85244  | -4.06551 | 2.54112  |
| 137 | N1 | PX  | 0.02295  | -1.18051 | 0.27510  | -0.89350 | 0.40758  |
| 138 | N1 | PY  | -0.39299 | -0.81665 | -0.08781 | -0.82270 | 0.63645  |
| 139 | N1 | PZ  | 0.00000  | 0.00000  | 0.00000  | 0.00000  | 0.00000  |
| 140 | N1 | DXX | 0.36194  | 0.77167  | -0.13777 | 0.32614  | -0.46444 |
| 141 | N1 | DYY | 0.20741  | 0.91617  | -0.25795 | 0.34350  | -0.30390 |

|     |     |     |          |          |          |          |          |
|-----|-----|-----|----------|----------|----------|----------|----------|
| 142 | N1  | DZZ | 0.26257  | 1.05857  | -0.16806 | 0.66209  | -0.44761 |
| 143 | N1  | DXY | -0.03213 | 0.00383  | -0.05729 | 0.02178  | 0.08504  |
| 144 | N1  | DXZ | 0.00000  | 0.00000  | 0.00000  | 0.00000  | 0.00000  |
| 145 | N1  | DYZ | 0.00000  | 0.00000  | 0.00000  | 0.00000  | 0.00000  |
| 146 | H6  | S   | 0.19035  | -0.05189 | 0.01301  | -0.08547 | -0.23025 |
| 147 | H6  | S   | 0.00514  | 0.09539  | -0.03824 | 0.10716  | -0.08060 |
| 148 | H6  | PX  | 0.13605  | -0.06020 | 0.00213  | -0.11403 | -0.20134 |
| 149 | H6  | PY  | 0.03208  | -0.02882 | 0.00424  | -0.04167 | -0.06211 |
| 150 | H6  | PZ  | 0.00000  | 0.00000  | 0.00000  | 0.00000  | 0.00000  |
| 151 | C8  | S   | -0.15084 | 0.16390  | -0.02370 | 0.15775  | 0.11415  |
| 152 | C8  | S   | 0.91522  | -1.03423 | -0.00453 | -0.96729 | -0.62044 |
| 153 | C8  | PX  | 0.04814  | 0.02600  | 0.01005  | -0.01009 | 0.00131  |
| 154 | C8  | PY  | -0.10497 | 0.02947  | 0.21523  | -0.09822 | -0.08522 |
| 155 | C8  | PZ  | 0.00000  | 0.00000  | 0.00000  | 0.00000  | 0.00000  |
| 156 | C8  | S   | 0.93127  | 0.64352  | 0.06198  | 0.43864  | -1.37084 |
| 157 | C8  | PX  | 0.25139  | -1.56695 | 0.33203  | -0.98218 | 0.30543  |
| 158 | C8  | PY  | 0.54209  | 0.86153  | 0.03900  | 0.89092  | -0.73896 |
| 159 | C8  | PZ  | 0.00000  | 0.00000  | 0.00000  | 0.00000  | 0.00000  |
| 160 | C8  | DXX | -0.63862 | 0.57649  | -0.07013 | 0.67931  | 0.53040  |
| 161 | C8  | DYY | -0.51877 | 0.72134  | -0.10275 | 0.79495  | 0.55356  |
| 162 | C8  | DZZ | -0.58103 | 0.59326  | -0.05543 | 0.55504  | 0.40936  |
| 163 | C8  | DXY | 0.02656  | -0.03422 | 0.12713  | -0.08655 | -0.02481 |
| 164 | C8  | DXZ | 0.00000  | 0.00000  | 0.00000  | 0.00000  | 0.00000  |
| 165 | C8  | DYZ | 0.00000  | 0.00000  | 0.00000  | 0.00000  | 0.00000  |
| 166 | H8  | S   | -0.00180 | -0.12087 | 0.27993  | -0.16621 | 0.00298  |
| 167 | H8  | S   | -0.13230 | -0.23539 | -0.11884 | -0.20858 | 0.17791  |
| 168 | H8  | PX  | -0.02840 | 0.03460  | -0.26200 | 0.10948  | 0.04597  |
| 169 | H8  | PY  | -0.04558 | 0.03204  | 0.01786  | 0.02466  | 0.02014  |
| 170 | H8  | PZ  | 0.00000  | 0.00000  | 0.00000  | 0.00000  | 0.00000  |
| 171 | C10 | S   | -0.17145 | 0.11681  | 0.28615  | -0.10806 | -0.14820 |
| 172 | C10 | S   | 1.15690  | -0.88498 | -1.78566 | 0.61256  | 0.90562  |
| 173 | C10 | PX  | -0.02157 | 0.02057  | 0.00238  | 0.01321  | 0.01245  |
| 174 | C10 | PY  | 0.09383  | -0.16419 | -0.02108 | -0.11004 | -0.04015 |
| 175 | C10 | PZ  | 0.00000  | 0.00000  | 0.00000  | 0.00000  | 0.00000  |
| 176 | C10 | S   | 0.56679  | 0.36499  | -0.92199 | 0.98859  | 0.26158  |
| 177 | C10 | PX  | -0.12299 | 0.50031  | -0.14692 | 0.30103  | -0.08463 |
| 178 | C10 | PY  | 0.01449  | 0.38533  | -0.14687 | 0.30326  | -0.03250 |
| 179 | C10 | PZ  | 0.00000  | 0.00000  | 0.00000  | 0.00000  | 0.00000  |
| 180 | C10 | DXX | -0.78854 | 0.62460  | 1.32665  | -0.49590 | -0.76275 |
| 181 | C10 | DYY | -0.70612 | 0.44062  | 1.28688  | -0.61176 | -0.74012 |
| 182 | C10 | DZZ | -0.64096 | 0.42342  | 1.04785  | -0.37656 | -0.50747 |
| 183 | C10 | DXY | -0.01251 | 0.08550  | 0.04390  | 0.03826  | -0.00523 |
| 184 | C10 | DXZ | 0.00000  | 0.00000  | 0.00000  | 0.00000  | 0.00000  |
| 185 | C10 | DYZ | 0.00000  | 0.00000  | 0.00000  | 0.00000  | 0.00000  |
| 186 | H16 | S   | 0.14073  | -0.18207 | -0.19152 | 0.04038  | 0.15849  |
| 187 | H16 | S   | -0.05472 | -0.09818 | 0.20777  | -0.18720 | -0.04903 |
| 188 | H16 | PX  | -0.11586 | 0.08662  | 0.20409  | -0.09337 | -0.14652 |
| 189 | H16 | PY  | 0.02565  | -0.03635 | -0.06475 | 0.03210  | 0.05307  |
| 190 | H16 | PZ  | 0.00000  | 0.00000  | 0.00000  | 0.00000  | 0.00000  |
| 191 | H18 | S   | 0.11504  | -0.08872 | -0.25285 | 0.11579  | 0.13525  |
| 192 | H18 | S   | -0.14119 | 0.27903  | 0.08047  | 0.04618  | -0.10210 |
| 193 | H18 | PX  | 0.08603  | -0.06932 | -0.19088 | 0.07837  | 0.11056  |
| 194 | H18 | PY  | 0.06744  | -0.08711 | -0.14997 | 0.05747  | 0.10958  |
| 195 | H18 | PZ  | 0.00000  | 0.00000  | 0.00000  | 0.00000  | 0.00000  |

|     |    |     |          |          |          |          |          |
|-----|----|-----|----------|----------|----------|----------|----------|
| 196 | C9 | S   | -0.00942 | 0.07415  | -0.05039 | -0.31279 | 0.13478  |
| 197 | C9 | S   | 0.02628  | -0.47960 | 0.30243  | 1.79162  | -0.75850 |
| 198 | C9 | PX  | -0.01958 | 0.00203  | -0.01503 | -0.00527 | -0.01631 |
| 199 | C9 | PY  | 0.00294  | -0.01282 | 0.00145  | 0.00964  | -0.00665 |
| 200 | C9 | PZ  | 0.00000  | 0.00000  | 0.00000  | 0.00000  | 0.00000  |
| 201 | C9 | S   | 0.03700  | 0.51542  | 0.04841  | 1.19174  | -0.53494 |
| 202 | C9 | PX  | -0.01943 | -0.22675 | 0.01835  | 0.05833  | -0.06863 |
| 203 | C9 | PY  | -0.05574 | -0.14440 | 0.02342  | -0.10667 | 0.06237  |
| 204 | C9 | PZ  | 0.00000  | 0.00000  | 0.00000  | 0.00000  | 0.00000  |
| 205 | C9 | DXX | -0.01334 | 0.17870  | -0.17734 | -1.28943 | 0.56455  |
| 206 | C9 | DYY | -0.02663 | 0.36710  | -0.21508 | -1.33828 | 0.58301  |
| 207 | C9 | DZZ | -0.04728 | 0.36473  | -0.24007 | -1.36087 | 0.56716  |
| 208 | C9 | DXY | 0.02284  | -0.03469 | 0.02382  | 0.04139  | -0.00065 |
| 209 | C9 | DXZ | 0.00000  | 0.00000  | 0.00000  | 0.00000  | 0.00000  |
| 210 | C9 | DYZ | 0.00000  | 0.00000  | 0.00000  | 0.00000  | 0.00000  |
| 211 | H3 | S   | 0.01234  | -0.12238 | 0.04237  | 0.20883  | -0.09203 |
| 212 | H3 | S   | 0.02296  | -0.01248 | -0.02796 | -0.16867 | 0.06123  |
| 213 | H3 | PX  | 0.00101  | -0.02439 | 0.00955  | 0.04760  | -0.02109 |
| 214 | H3 | PY  | -0.00907 | 0.07541  | -0.03427 | -0.21223 | 0.09395  |
| 215 | H3 | PZ  | 0.00000  | 0.00000  | 0.00000  | 0.00000  | 0.00000  |
| 216 | H5 | S   | 0.00165  | -0.11447 | 0.04554  | 0.17447  | -0.07017 |
| 217 | H5 | S   | 0.00925  | -0.03190 | -0.00912 | -0.24676 | 0.13651  |
| 218 | H5 | PX  | -0.00526 | 0.04561  | -0.02418 | -0.11078 | 0.04381  |
| 219 | H5 | PY  | 0.00700  | -0.00144 | 0.01160  | 0.07179  | -0.02718 |
| 220 | H5 | PZ  | 0.01224  | -0.04430 | 0.03577  | 0.16701  | -0.05924 |
| 221 | H7 | S   | 0.00165  | -0.11447 | 0.04554  | 0.17447  | -0.07017 |
| 222 | H7 | S   | 0.00925  | -0.03190 | -0.00912 | -0.24676 | 0.13651  |
| 223 | H7 | PX  | -0.00526 | 0.04561  | -0.02418 | -0.11078 | 0.04381  |
| 224 | H7 | PY  | 0.00700  | -0.00144 | 0.01160  | 0.07179  | -0.02718 |
| 225 | H7 | PZ  | -0.01224 | 0.04430  | -0.03577 | -0.16701 | 0.05924  |

|              |           |           |           |           |         |
|--------------|-----------|-----------|-----------|-----------|---------|
| MO:          | 221       | 222       | 223       | 224       | 225     |
| Eigenvalues: | 4.89251   | 4.92769   | 5.06080   | 5.28515   | 0.00000 |
| (ev):        | 133.13204 | 134.08936 | 137.71148 | 143.81642 | 0.00000 |

|    |    |     |          |          |          |          |         |
|----|----|-----|----------|----------|----------|----------|---------|
|    |    | A   | A        | A        | A        | A        |         |
| 1  | H1 | S   | 0.09346  | -0.06041 | 0.06639  | -0.21002 | 0.00000 |
| 2  | H1 | S   | 0.04702  | -0.10299 | -0.11770 | 0.05064  | 0.00000 |
| 3  | H1 | PX  | -0.10617 | 0.01232  | -0.07722 | 0.21722  | 0.00000 |
| 4  | H1 | PY  | -0.06427 | 0.00144  | -0.03359 | 0.06089  | 0.00000 |
| 5  | H1 | PZ  | 0.00000  | 0.00000  | 0.00000  | 0.00000  | 0.00000 |
| 6  | C1 | S   | -0.08281 | 0.03569  | -0.04754 | 0.17578  | 0.00000 |
| 7  | C1 | S   | 0.47862  | -0.12461 | 0.36196  | -1.08680 | 0.00000 |
| 8  | C1 | PX  | -0.00939 | -0.15496 | 0.06027  | -0.08382 | 0.00000 |
| 9  | C1 | PY  | -0.04214 | 0.15465  | -0.12731 | -0.03084 | 0.00000 |
| 10 | C1 | PZ  | 0.00000  | 0.00000  | 0.00000  | 0.00000  | 0.00000 |
| 11 | C1 | S   | -0.33368 | -0.88738 | -0.35963 | -0.77295 | 0.00000 |
| 12 | C1 | PX  | -0.18921 | 0.38004  | 0.32227  | 0.26037  | 0.00000 |
| 13 | C1 | PY  | 1.04042  | 0.80883  | 0.02492  | -0.11260 | 0.00000 |
| 14 | C1 | PZ  | 0.00000  | 0.00000  | 0.00000  | 0.00000  | 0.00000 |
| 15 | C1 | DXX | -0.42772 | 0.25985  | -0.39589 | 1.00996  | 0.00000 |
| 16 | C1 | DYY | -0.32503 | 0.17235  | -0.23743 | 1.06417  | 0.00000 |
| 17 | C1 | DZZ | -0.30377 | 0.11503  | -0.16049 | 0.57514  | 0.00000 |
| 18 | C1 | DXY | -0.07650 | -0.20896 | 0.09998  | 0.02774  | 0.00000 |

|    |    |     |          |          |          |          |         |
|----|----|-----|----------|----------|----------|----------|---------|
| 19 | C1 | DXZ | 0.00000  | 0.00000  | 0.00000  | 0.00000  | 0.00000 |
| 20 | C1 | DYZ | 0.00000  | 0.00000  | 0.00000  | 0.00000  | 0.00000 |
| 21 | C2 | S   | -0.02437 | 0.19802  | 0.12539  | -0.12073 | 0.00000 |
| 22 | C2 | S   | 0.42765  | -0.96543 | -0.80088 | 0.78448  | 0.00000 |
| 23 | C2 | PX  | -0.04067 | 0.02161  | -0.01137 | -0.04662 | 0.00000 |
| 24 | C2 | PY  | 0.09087  | 0.00956  | 0.09658  | -0.04038 | 0.00000 |
| 25 | C2 | PZ  | 0.00000  | 0.00000  | 0.00000  | 0.00000  | 0.00000 |
| 26 | C2 | S   | -0.23847 | -1.25845 | -0.49613 | 0.54674  | 0.00000 |
| 27 | C2 | PX  | -0.20649 | -0.59415 | 0.10130  | 0.13753  | 0.00000 |
| 28 | C2 | PY  | 0.11268  | 0.00428  | 0.11199  | 0.49312  | 0.00000 |
| 29 | C2 | PZ  | 0.00000  | 0.00000  | 0.00000  | 0.00000  | 0.00000 |
| 30 | C2 | DXX | -0.26847 | 0.91708  | 0.72894  | -0.70034 | 0.00000 |
| 31 | C2 | DYY | -0.28255 | 0.73894  | 0.68465  | -0.75367 | 0.00000 |
| 32 | C2 | DZZ | -0.09857 | 0.71030  | 0.41462  | -0.39118 | 0.00000 |
| 33 | C2 | DXY | 0.15299  | 0.07508  | 0.08880  | 0.02072  | 0.00000 |
| 34 | C2 | DXZ | 0.00000  | 0.00000  | 0.00000  | 0.00000  | 0.00000 |
| 35 | C2 | DYZ | 0.00000  | 0.00000  | 0.00000  | 0.00000  | 0.00000 |
| 36 | C3 | S   | -0.00106 | 0.11886  | -0.05102 | -0.23896 | 0.00000 |
| 37 | C3 | S   | -0.06705 | -0.68532 | 0.14849  | 1.31333  | 0.00000 |
| 38 | C3 | PX  | 0.02836  | -0.06362 | -0.05113 | -0.04128 | 0.00000 |
| 39 | C3 | PY  | 0.05840  | 0.03274  | 0.10010  | 0.11990  | 0.00000 |
| 40 | C3 | PZ  | 0.00000  | 0.00000  | 0.00000  | 0.00000  | 0.00000 |
| 41 | C3 | S   | 1.92839  | 0.77741  | 0.98672  | 3.54694  | 0.00000 |
| 42 | C3 | PX  | 0.92653  | 1.15505  | -0.61171 | -0.45155 | 0.00000 |
| 43 | C3 | PY  | 0.01278  | -0.58529 | 0.44803  | -1.49973 | 0.00000 |
| 44 | C3 | PZ  | 0.00000  | 0.00000  | 0.00000  | 0.00000  | 0.00000 |
| 45 | C3 | DXX | -0.11252 | 0.49300  | -0.11666 | -0.99628 | 0.00000 |
| 46 | C3 | DYY | 0.11879  | 0.54992  | -0.32746 | -1.42173 | 0.00000 |
| 47 | C3 | DZZ | 0.00964  | 0.45045  | -0.16608 | -0.80478 | 0.00000 |
| 48 | C3 | DXY | -0.09812 | -0.02578 | 0.06662  | 0.00518  | 0.00000 |
| 49 | C3 | DXZ | 0.00000  | 0.00000  | 0.00000  | 0.00000  | 0.00000 |
| 50 | C3 | DYZ | 0.00000  | 0.00000  | 0.00000  | 0.00000  | 0.00000 |
| 51 | C4 | S   | -0.05296 | -0.33158 | 0.15541  | -0.16242 | 0.00000 |
| 52 | C4 | S   | 0.08884  | 1.70011  | -0.98668 | 0.96792  | 0.00000 |
| 53 | C4 | PX  | -0.00730 | -0.07317 | 0.02185  | -0.07101 | 0.00000 |
| 54 | C4 | PY  | -0.01102 | -0.03980 | -0.00560 | 0.03009  | 0.00000 |
| 55 | C4 | PZ  | 0.00000  | 0.00000  | 0.00000  | 0.00000  | 0.00000 |
| 56 | C4 | S   | -1.70585 | -0.41176 | -0.24861 | 0.79490  | 0.00000 |
| 57 | C4 | PX  | -0.03679 | -0.35053 | 0.32155  | 0.01884  | 0.00000 |
| 58 | C4 | PY  | -1.32242 | -2.80458 | 0.27834  | -0.64663 | 0.00000 |
| 59 | C4 | PZ  | 0.00000  | 0.00000  | 0.00000  | 0.00000  | 0.00000 |
| 60 | C4 | DXX | -0.14618 | -1.39938 | 0.82027  | -0.89523 | 0.00000 |
| 61 | C4 | DYY | -0.07287 | -1.52755 | 0.85078  | -0.92386 | 0.00000 |
| 62 | C4 | DZZ | -0.14875 | -1.09457 | 0.52801  | -0.51989 | 0.00000 |
| 63 | C4 | DXY | -0.09316 | 0.05196  | -0.05459 | 0.08533  | 0.00000 |
| 64 | C4 | DXZ | 0.00000  | 0.00000  | 0.00000  | 0.00000  | 0.00000 |
| 65 | C4 | DYZ | 0.00000  | 0.00000  | 0.00000  | 0.00000  | 0.00000 |
| 66 | C5 | S   | -0.07279 | -0.00762 | -0.16721 | 0.11891  | 0.00000 |
| 67 | C5 | S   | 0.24223  | -0.04684 | 1.00836  | -0.76651 | 0.00000 |
| 68 | C5 | PX  | -0.00013 | 0.12863  | 0.02194  | -0.01775 | 0.00000 |
| 69 | C5 | PY  | 0.02754  | 0.11305  | 0.06007  | -0.05061 | 0.00000 |
| 70 | C5 | PZ  | 0.00000  | 0.00000  | 0.00000  | 0.00000  | 0.00000 |
| 71 | C5 | S   | 0.64915  | -0.08422 | 0.89446  | -1.09936 | 0.00000 |
| 72 | C5 | PX  | 0.31477  | -0.20223 | 0.23080  | -0.03810 | 0.00000 |



|     |    |     |          |          |          |          |         |
|-----|----|-----|----------|----------|----------|----------|---------|
| 73  | C5 | PY  | -0.13743 | 0.21329  | -0.08945 | 0.27026  | 0.00000 |
| 74  | C5 | PZ  | 0.00000  | 0.00000  | 0.00000  | 0.00000  | 0.00000 |
| 75  | C5 | DXX | -0.18161 | 0.12279  | -0.83276 | 0.68019  | 0.00000 |
| 76  | C5 | DYY | -0.22224 | -0.13890 | -0.91561 | 0.72201  | 0.00000 |
| 77  | C5 | DZZ | -0.25735 | 0.00963  | -0.57765 | 0.38957  | 0.00000 |
| 78  | C5 | DXY | 0.07328  | 0.19239  | 0.00689  | 0.03912  | 0.00000 |
| 79  | C5 | DXZ | 0.00000  | 0.00000  | 0.00000  | 0.00000  | 0.00000 |
| 80  | C5 | DYZ | 0.00000  | 0.00000  | 0.00000  | 0.00000  | 0.00000 |
| 81  | C6 | S   | 0.21712  | -0.10956 | -0.02869 | 0.17258  | 0.00000 |
| 82  | C6 | S   | -1.30622 | 0.67355  | 0.33600  | -0.94616 | 0.00000 |
| 83  | C6 | PX  | 0.01006  | 0.02866  | 0.05497  | 0.03664  | 0.00000 |
| 84  | C6 | PY  | -0.00620 | 0.05163  | 0.05234  | -0.03197 | 0.00000 |
| 85  | C6 | PZ  | 0.00000  | 0.00000  | 0.00000  | 0.00000  | 0.00000 |
| 86  | C6 | S   | 1.61407  | 2.29136  | 0.20874  | -1.58260 | 0.00000 |
| 87  | C6 | PX  | -0.12085 | -0.00564 | -0.44926 | -1.27490 | 0.00000 |
| 88  | C6 | PY  | -1.38513 | -0.04505 | -0.87342 | -0.11920 | 0.00000 |
| 89  | C6 | PZ  | 0.00000  | 0.00000  | 0.00000  | 0.00000  | 0.00000 |
| 90  | C6 | DXX | 0.94364  | -0.54792 | -0.19026 | 0.85472  | 0.00000 |
| 91  | C6 | DYY | 1.03417  | -0.58832 | -0.33861 | 0.85364  | 0.00000 |
| 92  | C6 | DZZ | 0.76754  | -0.38966 | -0.10778 | 0.58259  | 0.00000 |
| 93  | C6 | DXY | -0.09342 | 0.03984  | 0.02196  | -0.07114 | 0.00000 |
| 94  | C6 | DXZ | 0.00000  | 0.00000  | 0.00000  | 0.00000  | 0.00000 |
| 95  | C6 | DYZ | 0.00000  | 0.00000  | 0.00000  | 0.00000  | 0.00000 |
| 96  | C7 | S   | 0.04941  | 0.03224  | 0.22165  | 0.19696  | 0.00000 |
| 97  | C7 | S   | -0.01281 | 0.00915  | -1.37657 | -0.88369 | 0.00000 |
| 98  | C7 | PX  | 0.04173  | 0.03952  | -0.00831 | -0.06528 | 0.00000 |
| 99  | C7 | PY  | 0.02768  | -0.08473 | -0.00666 | 0.11046  | 0.00000 |
| 100 | C7 | PZ  | 0.00000  | 0.00000  | 0.00000  | 0.00000  | 0.00000 |
| 101 | C7 | S   | -1.74996 | -1.71308 | -0.94904 | -3.34480 | 0.00000 |
| 102 | C7 | PX  | 1.04456  | 0.78614  | 0.34438  | 1.50370  | 0.00000 |
| 103 | C7 | PY  | -0.67554 | -0.57788 | 0.26874  | -0.07256 | 0.00000 |
| 104 | C7 | PZ  | 0.00000  | 0.00000  | 0.00000  | 0.00000  | 0.00000 |
| 105 | C7 | DXX | 0.05693  | 0.01688  | 1.31150  | 1.13803  | 0.00000 |
| 106 | C7 | DYY | 0.02234  | -0.00773 | 0.97939  | 0.80039  | 0.00000 |
| 107 | C7 | DZZ | 0.16890  | 0.10434  | 0.77049  | 0.62722  | 0.00000 |
| 108 | C7 | DXY | -0.06143 | 0.05737  | 0.03050  | -0.14478 | 0.00000 |
| 109 | C7 | DXZ | 0.00000  | 0.00000  | 0.00000  | 0.00000  | 0.00000 |
| 110 | C7 | DYZ | 0.00000  | 0.00000  | 0.00000  | 0.00000  | 0.00000 |
| 111 | O1 | S   | -0.29479 | -0.31360 | 0.00288  | -0.00679 | 0.00000 |
| 112 | O1 | S   | -0.40830 | -0.72873 | 0.12183  | -0.13395 | 0.00000 |
| 113 | O1 | PX  | -0.09187 | -0.05487 | -0.00493 | 0.00594  | 0.00000 |
| 114 | O1 | PY  | 0.07987  | 0.03579  | 0.03988  | -0.04355 | 0.00000 |
| 115 | O1 | PZ  | 0.00000  | 0.00000  | 0.00000  | 0.00000  | 0.00000 |
| 116 | O1 | S   | 4.30221  | 5.26465  | -0.30448 | 0.43167  | 0.00000 |
| 117 | O1 | PX  | 0.10611  | 0.26452  | -0.05632 | -0.02207 | 0.00000 |
| 118 | O1 | PY  | -0.86678 | -1.44792 | 0.27550  | -0.35403 | 0.00000 |
| 119 | O1 | PZ  | 0.00000  | 0.00000  | 0.00000  | 0.00000  | 0.00000 |
| 120 | O1 | DXX | -1.16238 | -0.99111 | -0.05036 | 0.00698  | 0.00000 |
| 121 | O1 | DYY | -0.86669 | -0.50778 | -0.21346 | 0.22990  | 0.00000 |
| 122 | O1 | DZZ | -0.96421 | -1.17050 | 0.07947  | -0.09158 | 0.00000 |
| 123 | O1 | DXY | -0.12945 | 0.08457  | -0.06473 | 0.04718  | 0.00000 |
| 124 | O1 | DXZ | 0.00000  | 0.00000  | 0.00000  | 0.00000  | 0.00000 |
| 125 | O1 | DYZ | 0.00000  | 0.00000  | 0.00000  | 0.00000  | 0.00000 |
| 126 | H4 | S   | 0.08071  | 0.07338  | 0.18114  | -0.12123 | 0.00000 |

|     |     |     |          |          |          |          |         |
|-----|-----|-----|----------|----------|----------|----------|---------|
| 127 | H4  | S   | 0.02883  | -0.11161 | -0.02750 | 0.05060  | 0.00000 |
| 128 | H4  | PX  | 0.04064  | 0.07618  | 0.13890  | -0.10360 | 0.00000 |
| 129 | H4  | PY  | -0.00147 | -0.03597 | -0.13509 | 0.10492  | 0.00000 |
| 130 | H4  | PZ  | 0.00000  | 0.00000  | 0.00000  | 0.00000  | 0.00000 |
| 131 | N1  | S   | 0.21093  | 0.14726  | 0.09760  | -0.00031 | 0.00000 |
| 132 | N1  | S   | 0.17583  | -0.02917 | -0.13189 | -0.00016 | 0.00000 |
| 133 | N1  | PX  | -0.02006 | 0.07564  | 0.10082  | -0.01716 | 0.00000 |
| 134 | N1  | PY  | -0.06514 | 0.11983  | 0.08081  | -0.08267 | 0.00000 |
| 135 | N1  | PZ  | 0.00000  | 0.00000  | 0.00000  | 0.00000  | 0.00000 |
| 136 | N1  | S   | -4.42498 | -2.30867 | -1.49012 | -0.11350 | 0.00000 |
| 137 | N1  | PX  | -0.94960 | -0.44646 | 0.03209  | 0.16656  | 0.00000 |
| 138 | N1  | PY  | -1.01870 | -0.39475 | -0.41104 | -0.35322 | 0.00000 |
| 139 | N1  | PZ  | 0.00000  | 0.00000  | 0.00000  | 0.00000  | 0.00000 |
| 140 | N1  | DXX | 0.39911  | 0.46477  | 0.50419  | 0.04735  | 0.00000 |
| 141 | N1  | DYY | 0.32443  | 0.50624  | 0.38808  | -0.16000 | 0.00000 |
| 142 | N1  | DZZ | 0.72498  | 0.42907  | 0.23110  | 0.02707  | 0.00000 |
| 143 | N1  | DXY | -0.02206 | -0.00108 | -0.03864 | -0.04840 | 0.00000 |
| 144 | N1  | DXZ | 0.00000  | 0.00000  | 0.00000  | 0.00000  | 0.00000 |
| 145 | N1  | DYZ | 0.00000  | 0.00000  | 0.00000  | 0.00000  | 0.00000 |
| 146 | H6  | S   | 0.03335  | -0.20908 | -0.15992 | 0.16014  | 0.00000 |
| 147 | H6  | S   | -0.08007 | -0.09102 | 0.13545  | 0.00762  | 0.00000 |
| 148 | H6  | PX  | 0.01559  | -0.19285 | -0.17869 | 0.14517  | 0.00000 |
| 149 | H6  | PY  | 0.02045  | -0.05205 | -0.05673 | 0.04058  | 0.00000 |
| 150 | H6  | PZ  | 0.00000  | 0.00000  | 0.00000  | 0.00000  | 0.00000 |
| 151 | C8  | S   | 0.11536  | -0.03803 | -0.22898 | -0.12074 | 0.00000 |
| 152 | C8  | S   | -0.80719 | 0.18561  | 1.43806  | 0.61520  | 0.00000 |
| 153 | C8  | PX  | 0.00518  | 0.03596  | -0.02563 | -0.02623 | 0.00000 |
| 154 | C8  | PY  | -0.05986 | 0.02921  | 0.07084  | 0.01051  | 0.00000 |
| 155 | C8  | PZ  | 0.00000  | 0.00000  | 0.00000  | 0.00000  | 0.00000 |
| 156 | C8  | S   | 0.84140  | 1.04860  | 1.47076  | 1.45934  | 0.00000 |
| 157 | C8  | PX  | -1.02884 | -0.44385 | 0.16645  | 0.53095  | 0.00000 |
| 158 | C8  | PY  | 1.49287  | 0.72345  | 0.32873  | 1.14297  | 0.00000 |
| 159 | C8  | PZ  | 0.00000  | 0.00000  | 0.00000  | 0.00000  | 0.00000 |
| 160 | C8  | DXX | 0.51150  | -0.22073 | -1.07312 | -0.45797 | 0.00000 |
| 161 | C8  | DYY | 0.66431  | -0.16036 | -1.34656 | -0.69701 | 0.00000 |
| 162 | C8  | DZZ | 0.40703  | -0.13816 | -0.80498 | -0.39763 | 0.00000 |
| 163 | C8  | DXY | -0.04165 | 0.04173  | -0.00788 | -0.02217 | 0.00000 |
| 164 | C8  | DXZ | 0.00000  | 0.00000  | 0.00000  | 0.00000  | 0.00000 |
| 165 | C8  | DYZ | 0.00000  | 0.00000  | 0.00000  | 0.00000  | 0.00000 |
| 166 | H8  | S   | -0.05397 | -0.00950 | -0.30967 | -0.30024 | 0.00000 |
| 167 | H8  | S   | -0.27934 | -0.18689 | 0.02933  | -0.25497 | 0.00000 |
| 168 | H8  | PX  | 0.00846  | -0.00669 | 0.29606  | 0.28165  | 0.00000 |
| 169 | H8  | PY  | 0.04348  | 0.02889  | -0.04631 | -0.01240 | 0.00000 |
| 170 | H8  | PZ  | 0.00000  | 0.00000  | 0.00000  | 0.00000  | 0.00000 |
| 171 | C10 | S   | -0.02941 | 0.06726  | 0.14305  | 0.05454  | 0.00000 |
| 172 | C10 | S   | 0.13818  | -0.40920 | -0.82223 | -0.26165 | 0.00000 |
| 173 | C10 | PX  | 0.01247  | 0.00586  | -0.03342 | -0.01735 | 0.00000 |
| 174 | C10 | PY  | -0.09568 | 0.00428  | 0.17395  | 0.12645  | 0.00000 |
| 175 | C10 | PZ  | 0.00000  | 0.00000  | 0.00000  | 0.00000  | 0.00000 |
| 176 | C10 | S   | 1.05459  | 0.06772  | -0.61864 | 0.14606  | 0.00000 |
| 177 | C10 | PX  | 0.21109  | 0.02124  | -0.00649 | -0.27023 | 0.00000 |
| 178 | C10 | PY  | 0.33826  | 0.05003  | -0.07421 | 0.01936  | 0.00000 |
| 179 | C10 | PZ  | 0.00000  | 0.00000  | 0.00000  | 0.00000  | 0.00000 |
| 180 | C10 | DXX | -0.11395 | 0.35014  | 0.76414  | 0.29009  | 0.00000 |

|     |     |     |          |          |          |          |         |
|-----|-----|-----|----------|----------|----------|----------|---------|
| 181 | C10 | DYY | -0.25076 | 0.32313  | 0.86239  | 0.34212  | 0.00000 |
| 182 | C10 | DZZ | -0.09171 | 0.22821  | 0.45047  | 0.16389  | 0.00000 |
| 183 | C10 | DXY | 0.06360  | 0.03468  | -0.09010 | -0.08222 | 0.00000 |
| 184 | C10 | DXZ | 0.00000  | 0.00000  | 0.00000  | 0.00000  | 0.00000 |
| 185 | C10 | DYZ | 0.00000  | 0.00000  | 0.00000  | 0.00000  | 0.00000 |
| 186 | H16 | S   | -0.01345 | -0.05988 | -0.17128 | -0.05348 | 0.00000 |
| 187 | H16 | S   | -0.13817 | 0.00955  | 0.09842  | 0.10513  | 0.00000 |
| 188 | H16 | PX  | -0.02980 | 0.06282  | 0.17986  | 0.08230  | 0.00000 |
| 189 | H16 | PY  | 0.00684  | -0.02542 | -0.05895 | -0.02022 | 0.00000 |
| 190 | H16 | PZ  | 0.00000  | 0.00000  | 0.00000  | 0.00000  | 0.00000 |
| 191 | H18 | S   | 0.02688  | -0.08358 | -0.12739 | -0.05548 | 0.00000 |
| 192 | H18 | S   | 0.03786  | 0.03155  | 0.08875  | -0.06606 | 0.00000 |
| 193 | H18 | PX  | 0.01532  | -0.05952 | -0.10154 | -0.03501 | 0.00000 |
| 194 | H18 | PY  | 0.00276  | -0.05858 | -0.10774 | -0.02983 | 0.00000 |
| 195 | H18 | PZ  | 0.00000  | 0.00000  | 0.00000  | 0.00000  | 0.00000 |
| 196 | C9  | S   | 0.29822  | -0.10087 | 0.07642  | -0.03611 | 0.00000 |
| 197 | C9  | S   | -1.62497 | 0.65390  | -0.42883 | 0.19492  | 0.00000 |
| 198 | C9  | PX  | -0.00664 | 0.03848  | -0.03491 | 0.02533  | 0.00000 |
| 199 | C9  | PY  | -0.00924 | 0.00335  | -0.00482 | 0.00743  | 0.00000 |
| 200 | C9  | PZ  | 0.00000  | 0.00000  | 0.00000  | 0.00000  | 0.00000 |
| 201 | C9  | S   | -1.91832 | -0.24309 | -0.35666 | 0.20795  | 0.00000 |
| 202 | C9  | PX  | 0.07457  | 0.09937  | 0.00461  | -0.04599 | 0.00000 |
| 203 | C9  | PY  | 0.39597  | 0.22999  | 0.01075  | -0.01508 | 0.00000 |
| 204 | C9  | PZ  | 0.00000  | 0.00000  | 0.00000  | 0.00000  | 0.00000 |
| 205 | C9  | DXX | 1.36754  | -0.34854 | 0.35046  | -0.17750 | 0.00000 |
| 206 | C9  | DYY | 1.22742  | -0.52374 | 0.34758  | -0.17139 | 0.00000 |
| 207 | C9  | DZZ | 1.22523  | -0.45998 | 0.30688  | -0.14085 | 0.00000 |
| 208 | C9  | DXY | -0.00551 | 0.02695  | 0.00728  | -0.00537 | 0.00000 |
| 209 | C9  | DXZ | 0.00000  | 0.00000  | 0.00000  | 0.00000  | 0.00000 |
| 210 | C9  | DYZ | 0.00000  | 0.00000  | 0.00000  | 0.00000  | 0.00000 |
| 211 | H3  | S   | -0.14699 | 0.13096  | -0.05146 | 0.02488  | 0.00000 |
| 212 | H3  | S   | 0.13980  | -0.05010 | 0.03971  | -0.01266 | 0.00000 |
| 213 | H3  | PX  | -0.03433 | 0.00266  | -0.00059 | -0.00429 | 0.00000 |
| 214 | H3  | PY  | 0.18446  | -0.12806 | 0.07016  | -0.04185 | 0.00000 |
| 215 | H3  | PZ  | 0.00000  | 0.00000  | 0.00000  | 0.00000  | 0.00000 |
| 216 | H5  | S   | -0.06975 | 0.12650  | -0.03607 | 0.01048  | 0.00000 |
| 217 | H5  | S   | 0.34042  | 0.02561  | 0.07178  | -0.01627 | 0.00000 |
| 218 | H5  | PX  | 0.08325  | -0.03232 | 0.01390  | -0.00241 | 0.00000 |
| 219 | H5  | PY  | -0.08522 | -0.00953 | -0.00871 | 0.00298  | 0.00000 |
| 220 | H5  | PZ  | -0.14281 | 0.06738  | -0.03657 | 0.02290  | 0.00000 |
| 221 | H7  | S   | -0.06975 | 0.12650  | -0.03607 | 0.01048  | 0.00000 |
| 222 | H7  | S   | 0.34042  | 0.02561  | 0.07178  | -0.01627 | 0.00000 |
| 223 | H7  | PX  | 0.08325  | -0.03232 | 0.01390  | -0.00241 | 0.00000 |
| 224 | H7  | PY  | -0.08522 | -0.00953 | -0.00871 | 0.00298  | 0.00000 |
| 225 | H7  | PZ  | 0.14281  | -0.06738 | 0.03657  | -0.02290 | 0.00000 |

### Mulliken Population Analysis

| AO | atom type | Occupancy |
|----|-----------|-----------|
| -- | ----      | -----     |
| 1  | H1 S      | 0.532517  |
| 2  | H1 S      | 0.298367  |
| 3  | H1 PX     | 0.009181  |

|    |    |     |           |
|----|----|-----|-----------|
| 4  | H1 | PY  | 0.002289  |
| 5  | H1 | PZ  | 0.003103  |
| 6  | C1 | S   | 1.996405  |
| 7  | C1 | S   | 0.655863  |
| 8  | C1 | PX  | 0.726659  |
| 9  | C1 | PY  | 0.716440  |
| 10 | C1 | PZ  | 0.597250  |
| 11 | C1 | S   | 0.437520  |
| 12 | C1 | PX  | 0.278377  |
| 13 | C1 | PY  | 0.218376  |
| 14 | C1 | PZ  | 0.530178  |
| 15 | C1 | DXX | 0.018328  |
| 16 | C1 | DYY | 0.019897  |
| 17 | C1 | DZZ | -0.017491 |
| 18 | C1 | DXY | 0.014336  |
| 19 | C1 | DXZ | 0.005073  |
| 20 | C1 | DYZ | 0.005884  |
| 21 | C2 | S   | 1.996577  |
| 22 | C2 | S   | 0.674998  |
| 23 | C2 | PX  | 0.724961  |
| 24 | C2 | PY  | 0.759276  |
| 25 | C2 | PZ  | 0.518959  |
| 26 | C2 | S   | 0.465593  |
| 27 | C2 | PX  | 0.301499  |
| 28 | C2 | PY  | 0.165506  |
| 29 | C2 | PZ  | 0.450104  |
| 30 | C2 | DXX | 0.017019  |
| 31 | C2 | DYY | 0.020276  |
| 32 | C2 | DZZ | -0.018189 |
| 33 | C2 | DXY | 0.016380  |
| 34 | C2 | DXZ | 0.002249  |
| 35 | C2 | DYZ | 0.008470  |
| 36 | C3 | S   | 1.996663  |
| 37 | C3 | S   | 0.673620  |
| 38 | C3 | PX  | 0.721380  |
| 39 | C3 | PY  | 0.755201  |
| 40 | C3 | PZ  | 0.534254  |
| 41 | C3 | S   | 0.433570  |
| 42 | C3 | PX  | 0.211720  |
| 43 | C3 | PY  | 0.230966  |
| 44 | C3 | PZ  | 0.451643  |
| 45 | C3 | DXX | 0.017682  |
| 46 | C3 | DYY | 0.031068  |
| 47 | C3 | DZZ | -0.017546 |
| 48 | C3 | DXY | 0.014666  |
| 49 | C3 | DXZ | 0.004221  |
| 50 | C3 | DYZ | 0.011640  |
| 51 | C4 | S   | 1.996668  |
| 52 | C4 | S   | 0.679027  |
| 53 | C4 | PX  | 0.774123  |
| 54 | C4 | PY  | 0.627839  |
| 55 | C4 | PZ  | 0.520384  |
| 56 | C4 | S   | 0.341095  |
| 57 | C4 | PX  | 0.142984  |

|     |    |     |           |
|-----|----|-----|-----------|
| 58  | C4 | PY  | 0.030891  |
| 59  | C4 | PZ  | 0.386812  |
| 60  | C4 | DXX | 0.024767  |
| 61  | C4 | DYY | 0.031904  |
| 62  | C4 | DZZ | -0.020395 |
| 63  | C4 | DXY | 0.022756  |
| 64  | C4 | DXZ | 0.008435  |
| 65  | C4 | DYZ | 0.019842  |
| 66  | C5 | S   | 1.996586  |
| 67  | C5 | S   | 0.674449  |
| 68  | C5 | PX  | 0.703647  |
| 69  | C5 | PY  | 0.772905  |
| 70  | C5 | PZ  | 0.515694  |
| 71  | C5 | S   | 0.505642  |
| 72  | C5 | PX  | 0.252806  |
| 73  | C5 | PY  | 0.246684  |
| 74  | C5 | PZ  | 0.461436  |
| 75  | C5 | DXX | 0.016760  |
| 76  | C5 | DYY | 0.021398  |
| 77  | C5 | DZZ | -0.018695 |
| 78  | C5 | DXY | 0.015684  |
| 79  | C5 | DXZ | 0.003175  |
| 80  | C5 | DYZ | 0.007607  |
| 81  | C6 | S   | 1.996714  |
| 82  | C6 | S   | 0.692307  |
| 83  | C6 | PX  | 0.727693  |
| 84  | C6 | PY  | 0.750531  |
| 85  | C6 | PZ  | 0.487710  |
| 86  | C6 | S   | 0.343431  |
| 87  | C6 | PX  | 0.190641  |
| 88  | C6 | PY  | 0.130764  |
| 89  | C6 | PZ  | 0.371023  |
| 90  | C6 | DXX | 0.020123  |
| 91  | C6 | DYY | 0.030987  |
| 92  | C6 | DZZ | -0.019967 |
| 93  | C6 | DXY | 0.030036  |
| 94  | C6 | DXZ | 0.005444  |
| 95  | C6 | DYZ | 0.016082  |
| 96  | C7 | S   | 1.996657  |
| 97  | C7 | S   | 0.670549  |
| 98  | C7 | PX  | 0.728845  |
| 99  | C7 | PY  | 0.733341  |
| 100 | C7 | PZ  | 0.536088  |
| 101 | C7 | S   | 0.448949  |
| 102 | C7 | PX  | 0.320615  |
| 103 | C7 | PY  | 0.186017  |
| 104 | C7 | PZ  | 0.480038  |
| 105 | C7 | DXX | 0.022761  |
| 106 | C7 | DYY | 0.014997  |
| 107 | C7 | DZZ | -0.017778 |
| 108 | C7 | DXY | 0.016465  |
| 109 | C7 | DXZ | 0.003892  |
| 110 | C7 | DYZ | 0.007348  |
| 111 | O1 | S   | 1.995297  |

|     |    |     |           |
|-----|----|-----|-----------|
| 112 | 01 | S   | 0.885512  |
| 113 | 01 | PX  | 0.942983  |
| 114 | 01 | PY  | 0.859023  |
| 115 | 01 | PZ  | 1.115339  |
| 116 | 01 | S   | 0.948862  |
| 117 | 01 | PX  | 0.597882  |
| 118 | 01 | PY  | 0.511108  |
| 119 | 01 | PZ  | 0.738701  |
| 120 | 01 | DXX | 0.016537  |
| 121 | 01 | DYY | 0.025687  |
| 122 | 01 | DZZ | -0.000113 |
| 123 | 01 | DXY | 0.006043  |
| 124 | 01 | DXZ | 0.002863  |
| 125 | 01 | DYZ | 0.004840  |
| 126 | H4 | S   | 0.531560  |
| 127 | H4 | S   | 0.276527  |
| 128 | H4 | PX  | 0.005579  |
| 129 | H4 | PY  | 0.006053  |
| 130 | H4 | PZ  | 0.002260  |
| 131 | N1 | S   | 1.996242  |
| 132 | N1 | S   | 0.787125  |
| 133 | N1 | PX  | 0.865540  |
| 134 | N1 | PY  | 0.833170  |
| 135 | N1 | PZ  | 0.661960  |
| 136 | N1 | S   | 0.962512  |
| 137 | N1 | PX  | 0.516183  |
| 138 | N1 | PY  | 0.371284  |
| 139 | N1 | PZ  | 0.545098  |
| 140 | N1 | DXX | 0.008194  |
| 141 | N1 | DYY | 0.014474  |
| 142 | N1 | DZZ | -0.011320 |
| 143 | N1 | DXY | 0.008872  |
| 144 | N1 | DXZ | 0.004584  |
| 145 | N1 | DYZ | 0.011447  |
| 146 | H6 | S   | 0.530699  |
| 147 | H6 | S   | 0.276199  |
| 148 | H6 | PX  | 0.009342  |
| 149 | H6 | PY  | 0.002422  |
| 150 | H6 | PZ  | 0.002302  |
| 151 | C8 | S   | 1.996661  |
| 152 | C8 | S   | 0.680929  |
| 153 | C8 | PX  | 0.660898  |
| 154 | C8 | PY  | 0.774976  |
| 155 | C8 | PZ  | 0.535776  |
| 156 | C8 | S   | 0.377242  |
| 157 | C8 | PX  | 0.097228  |
| 158 | C8 | PY  | 0.120073  |
| 159 | C8 | PZ  | 0.427158  |
| 160 | C8 | DXX | 0.020848  |
| 161 | C8 | DYY | 0.029138  |
| 162 | C8 | DZZ | -0.019142 |
| 163 | C8 | DXY | 0.025485  |
| 164 | C8 | DXZ | 0.010042  |
| 165 | C8 | DYZ | 0.010054  |

|     |     |     |           |
|-----|-----|-----|-----------|
| 166 | H8  | S   | 0.531217  |
| 167 | H8  | S   | 0.294522  |
| 168 | H8  | PX  | 0.010160  |
| 169 | H8  | PY  | 0.001670  |
| 170 | H8  | PZ  | 0.002661  |
| 171 | C10 | S   | 1.996636  |
| 172 | C10 | S   | 0.678138  |
| 173 | C10 | PX  | 0.725035  |
| 174 | C10 | PY  | 0.768638  |
| 175 | C10 | PZ  | 0.470293  |
| 176 | C10 | S   | 0.565066  |
| 177 | C10 | PX  | 0.360903  |
| 178 | C10 | PY  | 0.244104  |
| 179 | C10 | PZ  | 0.451542  |
| 180 | C10 | DXX | 0.012351  |
| 181 | C10 | DYY | 0.018690  |
| 182 | C10 | DZZ | -0.020290 |
| 183 | C10 | DXY | 0.013151  |
| 184 | C10 | DXZ | 0.000362  |
| 185 | C10 | DYZ | 0.007672  |
| 186 | H16 | S   | 0.533306  |
| 187 | H16 | S   | 0.308514  |
| 188 | H16 | PX  | 0.009115  |
| 189 | H16 | PY  | 0.002490  |
| 190 | H16 | PZ  | 0.002273  |
| 191 | H18 | S   | 0.529207  |
| 192 | H18 | S   | 0.291436  |
| 193 | H18 | PX  | 0.006576  |
| 194 | H18 | PY  | 0.005231  |
| 195 | H18 | PZ  | 0.002164  |
| 196 | C9  | S   | 1.996709  |
| 197 | C9  | S   | 0.648252  |
| 198 | C9  | PX  | 0.572181  |
| 199 | C9  | PY  | 0.686169  |
| 200 | C9  | PZ  | 0.722477  |
| 201 | C9  | S   | 0.547280  |
| 202 | C9  | PX  | 0.151609  |
| 203 | C9  | PY  | 0.318498  |
| 204 | C9  | PZ  | 0.322838  |
| 205 | C9  | DXX | 0.012056  |
| 206 | C9  | DYY | 0.010736  |
| 207 | C9  | DZZ | 0.004387  |
| 208 | C9  | DXY | 0.014913  |
| 209 | C9  | DXZ | 0.020755  |
| 210 | C9  | DYZ | 0.003392  |
| 211 | H3  | S   | 0.540886  |
| 212 | H3  | S   | 0.304305  |
| 213 | H3  | PX  | 0.001138  |
| 214 | H3  | PY  | 0.009288  |
| 215 | H3  | PZ  | 0.002049  |
| 216 | H5  | S   | 0.540933  |
| 217 | H5  | S   | 0.327826  |
| 218 | H5  | PX  | 0.003466  |
| 219 | H5  | PY  | 0.002066  |

|     |    |    |          |
|-----|----|----|----------|
| 220 | H5 | PZ | 0.007116 |
| 221 | H7 | S  | 0.540933 |
| 222 | H7 | S  | 0.327826 |
| 223 | H7 | PX | 0.003466 |
| 224 | H7 | PY | 0.002066 |
| 225 | H7 | PZ | 0.007116 |

| Atom  | Occupancy | Charge    |
|-------|-----------|-----------|
| ----- | -----     | -----     |
| H1    | 0.845457  | 0.154543  |
| C1    | 6.203094  | -0.203094 |
| C2    | 6.103680  | -0.103680 |
| C3    | 6.070746  | -0.070746 |
| C4    | 5.587132  | 0.412868  |
| C5    | 6.175780  | -0.175780 |
| C6    | 5.773520  | 0.226480  |
| C7    | 6.148785  | -0.148785 |
| O1    | 8.650564  | -0.650564 |
| H4    | 0.821980  | 0.178020  |
| N1    | 7.575365  | -0.575365 |
| H6    | 0.820965  | 0.179035  |
| C8    | 5.747366  | 0.252634  |
| H8    | 0.840231  | 0.159769  |
| C10   | 6.292292  | -0.292292 |
| H16   | 0.855698  | 0.144302  |
| H18   | 0.834613  | 0.165387  |
| C9    | 6.032253  | -0.032253 |
| H3    | 0.857666  | 0.142334  |
| H5    | 0.881406  | 0.118594  |
| H7    | 0.881406  | 0.118594  |

Total Charge = 0.000000

#### Natural Atomic Orbital Populations

| Nao | Atom | Type | Basis | Occupancy |
|-----|------|------|-------|-----------|
| --- | ---  | ---  | ---   | -----     |
| 1   | H1   | S    | MIN   | 0.760102  |
| 2   | H1   | S    | RYD   | 0.000860  |
| 3   | H1   | PX   | RYD   | 0.000507  |
| 4   | H1   | PY   | RYD   | 0.000070  |
| 5   | H1   | PZ   | RYD   | 0.000117  |
| 6   | C1   | S    | MIN   | 1.998920  |
| 7   | C1   | S    | MIN   | 0.938227  |
| 8   | C1   | S    | RYD   | 0.000856  |
| 9   | C1   | S    | RYD   | 0.000027  |
| 10  | C1   | PX   | MIN   | 1.201661  |
| 11  | C1   | PX   | RYD   | 0.004427  |
| 12  | C1   | PY   | MIN   | 1.065741  |
| 13  | C1   | PY   | RYD   | 0.005363  |
| 14  | C1   | PZ   | MIN   | 1.134184  |



|    |    |         |     |          |
|----|----|---------|-----|----------|
| 15 | C1 | PZ      | RVD | 0.002329 |
| 16 | C1 | DXY     | RVD | 0.001729 |
| 17 | C1 | DXZ     | RVD | 0.001214 |
| 18 | C1 | DYZ     | RVD | 0.000560 |
| 19 | C1 | DXX-YY  | RVD | 0.001401 |
| 20 | C1 | D3ZZ-RR | RVD | 0.001197 |
| 21 | C2 | S       | MIN | 1.998987 |
| 22 | C2 | S       | MIN | 0.959355 |
| 23 | C2 | S       | RVD | 0.001088 |
| 24 | C2 | S       | RVD | 0.000036 |
| 25 | C2 | PX      | MIN | 1.186574 |
| 26 | C2 | PX      | RVD | 0.005910 |
| 27 | C2 | PY      | MIN | 1.075491 |
| 28 | C2 | PY      | RVD | 0.006953 |
| 29 | C2 | PZ      | MIN | 0.976752 |
| 30 | C2 | PZ      | RVD | 0.001688 |
| 31 | C2 | DXY     | RVD | 0.001824 |
| 32 | C2 | DXZ     | RVD | 0.000417 |
| 33 | C2 | DYZ     | RVD | 0.001288 |
| 34 | C2 | DXX-YY  | RVD | 0.001505 |
| 35 | C2 | D3ZZ-RR | RVD | 0.001225 |
| 36 | C3 | S       | MIN | 1.998989 |
| 37 | C3 | S       | MIN | 0.878637 |
| 38 | C3 | S       | RVD | 0.001423 |
| 39 | C3 | S       | RVD | 0.000050 |
| 40 | C3 | PX      | MIN | 1.075588 |
| 41 | C3 | PX      | RVD | 0.008844 |
| 42 | C3 | PY      | MIN | 1.106043 |
| 43 | C3 | PY      | RVD | 0.004179 |
| 44 | C3 | PZ      | MIN | 1.013808 |
| 45 | C3 | PZ      | RVD | 0.001066 |
| 46 | C3 | DXY     | RVD | 0.001368 |
| 47 | C3 | DXZ     | RVD | 0.000397 |
| 48 | C3 | DYZ     | RVD | 0.001620 |
| 49 | C3 | DXX-YY  | RVD | 0.001625 |
| 50 | C3 | D3ZZ-RR | RVD | 0.001064 |
| 51 | C4 | S       | MIN | 1.998783 |
| 52 | C4 | S       | MIN | 0.822480 |
| 53 | C4 | S       | RVD | 0.001487 |
| 54 | C4 | S       | RVD | 0.000114 |
| 55 | C4 | PX      | MIN | 1.071846 |
| 56 | C4 | PX      | RVD | 0.005692 |
| 57 | C4 | PY      | MIN | 0.753903 |
| 58 | C4 | PY      | RVD | 0.009798 |
| 59 | C4 | PZ      | MIN | 0.926714 |
| 60 | C4 | PZ      | RVD | 0.001710 |
| 61 | C4 | DXY     | RVD | 0.002106 |
| 62 | C4 | DXZ     | RVD | 0.001076 |
| 63 | C4 | DYZ     | RVD | 0.002641 |
| 64 | C4 | DXX-YY  | RVD | 0.002773 |
| 65 | C4 | D3ZZ-RR | RVD | 0.001038 |
| 66 | C5 | S       | MIN | 1.999024 |
| 67 | C5 | S       | MIN | 0.966354 |
| 68 | C5 | S       | RVD | 0.000852 |

|     |    |         |     |          |
|-----|----|---------|-----|----------|
| 69  | C5 | S       | RYD | 0.000031 |
| 70  | C5 | PX      | MIN | 1.102095 |
| 71  | C5 | PX      | RYD | 0.005945 |
| 72  | C5 | PY      | MIN | 1.154844 |
| 73  | C5 | PY      | RYD | 0.006763 |
| 74  | C5 | PZ      | MIN | 0.983121 |
| 75  | C5 | PZ      | RYD | 0.001731 |
| 76  | C5 | DXY     | RYD | 0.001684 |
| 77  | C5 | DXZ     | RYD | 0.000281 |
| 78  | C5 | DYZ     | RYD | 0.001397 |
| 79  | C5 | DXX-YY  | RYD | 0.001711 |
| 80  | C5 | D3ZZ-RR | RYD | 0.001302 |
| 81  | C6 | S       | MIN | 1.999151 |
| 82  | C6 | S       | MIN | 0.837925 |
| 83  | C6 | S       | RYD | 0.003711 |
| 84  | C6 | S       | RYD | 0.000112 |
| 85  | C6 | PX      | MIN | 1.033983 |
| 86  | C6 | PX      | RYD | 0.008355 |
| 87  | C6 | PY      | MIN | 0.948168 |
| 88  | C6 | PY      | RYD | 0.009704 |
| 89  | C6 | PZ      | MIN | 0.875846 |
| 90  | C6 | PZ      | RYD | 0.001174 |
| 91  | C6 | DXY     | RYD | 0.002901 |
| 92  | C6 | DXZ     | RYD | 0.000530 |
| 93  | C6 | DYZ     | RYD | 0.002381 |
| 94  | C6 | DXX-YY  | RYD | 0.001822 |
| 95  | C6 | D3ZZ-RR | RYD | 0.001023 |
| 96  | C7 | S       | MIN | 1.998873 |
| 97  | C7 | S       | MIN | 0.953736 |
| 98  | C7 | S       | RYD | 0.000711 |
| 99  | C7 | S       | RYD | 0.000041 |
| 100 | C7 | PX      | MIN | 1.200778 |
| 101 | C7 | PX      | RYD | 0.004175 |
| 102 | C7 | PY      | MIN | 1.040786 |
| 103 | C7 | PY      | RYD | 0.005468 |
| 104 | C7 | PZ      | MIN | 1.008539 |
| 105 | C7 | PZ      | RYD | 0.001671 |
| 106 | C7 | DXY     | RYD | 0.001779 |
| 107 | C7 | DXZ     | RYD | 0.000860 |
| 108 | C7 | DYZ     | RYD | 0.000911 |
| 109 | C7 | DXX-YY  | RYD | 0.001433 |
| 110 | C7 | D3ZZ-RR | RYD | 0.001216 |
| 111 | O1 | S       | MIN | 1.999715 |
| 112 | O1 | S       | MIN | 1.570738 |
| 113 | O1 | S       | RYD | 0.000895 |
| 114 | O1 | S       | RYD | 0.000026 |
| 115 | O1 | PX      | MIN | 1.642862 |
| 116 | O1 | PX      | RYD | 0.002596 |
| 117 | O1 | PY      | MIN | 1.499321 |
| 118 | O1 | PY      | RYD | 0.001512 |
| 119 | O1 | PZ      | MIN | 1.874311 |
| 120 | O1 | PZ      | RYD | 0.003659 |
| 121 | O1 | DXY     | RYD | 0.001613 |
| 122 | O1 | DXZ     | RYD | 0.001127 |

|     |     |         |     |          |
|-----|-----|---------|-----|----------|
| 123 | O1  | DYZ     | RVD | 0.001173 |
| 124 | O1  | DXX-YY  | RVD | 0.003951 |
| 125 | O1  | D3ZZ-RR | RVD | 0.002029 |
| 126 | H4  | S       | MIN | 0.749192 |
| 127 | H4  | S       | RVD | 0.000751 |
| 128 | H4  | PX      | RVD | 0.000309 |
| 129 | H4  | PY      | RVD | 0.000321 |
| 130 | H4  | PZ      | RVD | 0.000066 |
| 131 | N1  | S       | MIN | 1.999380 |
| 132 | N1  | S       | MIN | 1.379731 |
| 133 | N1  | S       | RVD | 0.000496 |
| 134 | N1  | S       | RVD | 0.000017 |
| 135 | N1  | PX      | MIN | 1.511466 |
| 136 | N1  | PX      | RVD | 0.004266 |
| 137 | N1  | PY      | MIN | 1.371089 |
| 138 | N1  | PY      | RVD | 0.003967 |
| 139 | N1  | PZ      | MIN | 1.227123 |
| 140 | N1  | PZ      | RVD | 0.001209 |
| 141 | N1  | DXY     | RVD | 0.002218 |
| 142 | N1  | DXZ     | RVD | 0.001760 |
| 143 | N1  | DYZ     | RVD | 0.002970 |
| 144 | N1  | DXX-YY  | RVD | 0.004686 |
| 145 | N1  | D3ZZ-RR | RVD | 0.002870 |
| 146 | H6  | S       | MIN | 0.748692 |
| 147 | H6  | S       | RVD | 0.000747 |
| 148 | H6  | PX      | RVD | 0.000524 |
| 149 | H6  | PY      | RVD | 0.000079 |
| 150 | H6  | PZ      | RVD | 0.000072 |
| 151 | C8  | S       | MIN | 1.999037 |
| 152 | C8  | S       | MIN | 0.866006 |
| 153 | C8  | S       | RVD | 0.002899 |
| 154 | C8  | S       | RVD | 0.000106 |
| 155 | C8  | PX      | MIN | 0.907783 |
| 156 | C8  | PX      | RVD | 0.009129 |
| 157 | C8  | PY      | MIN | 1.089210 |
| 158 | C8  | PY      | RVD | 0.008116 |
| 159 | C8  | PZ      | MIN | 1.005298 |
| 160 | C8  | PZ      | RVD | 0.001574 |
| 161 | C8  | DXY     | RVD | 0.002297 |
| 162 | C8  | DXZ     | RVD | 0.001228 |
| 163 | C8  | DYZ     | RVD | 0.001517 |
| 164 | C8  | DXX-YY  | RVD | 0.002114 |
| 165 | C8  | D3ZZ-RR | RVD | 0.001111 |
| 166 | H8  | S       | MIN | 0.762543 |
| 167 | H8  | S       | RVD | 0.000423 |
| 168 | H8  | PX      | RVD | 0.000592 |
| 169 | H8  | PY      | RVD | 0.000018 |
| 170 | H8  | PZ      | RVD | 0.000096 |
| 171 | C10 | S       | MIN | 1.998991 |
| 172 | C10 | S       | MIN | 1.045350 |
| 173 | C10 | S       | RVD | 0.001147 |
| 174 | C10 | S       | RVD | 0.000015 |
| 175 | C10 | PX      | MIN | 1.213224 |
| 176 | C10 | PX      | RVD | 0.004486 |

|     |     |         |     |          |
|-----|-----|---------|-----|----------|
| 177 | C10 | PY      | MIN | 1.134888 |
| 178 | C10 | PY      | RYD | 0.003455 |
| 179 | C10 | PZ      | MIN | 0.904125 |
| 180 | C10 | PZ      | RYD | 0.002294 |
| 181 | C10 | DXY     | RYD | 0.001829 |
| 182 | C10 | DXZ     | RYD | 0.000071 |
| 183 | C10 | DYZ     | RYD | 0.001483 |
| 184 | C10 | DXX-YY  | RYD | 0.002032 |
| 185 | C10 | D3ZZ-RR | RYD | 0.001512 |
| 186 | H16 | S       | MIN | 0.782926 |
| 187 | H16 | S       | RYD | 0.000407 |
| 188 | H16 | PX      | RYD | 0.000547 |
| 189 | H16 | PY      | RYD | 0.000073 |
| 190 | H16 | PZ      | RYD | 0.000088 |
| 191 | H18 | S       | MIN | 0.766048 |
| 192 | H18 | S       | RYD | 0.000814 |
| 193 | H18 | PX      | RYD | 0.000383 |
| 194 | H18 | PY      | RYD | 0.000240 |
| 195 | H18 | PZ      | RYD | 0.000075 |
| 196 | C9  | S       | MIN | 1.999446 |
| 197 | C9  | S       | MIN | 1.081286 |
| 198 | C9  | S       | RYD | 0.001539 |
| 199 | C9  | S       | RYD | 0.000031 |
| 200 | C9  | PX      | MIN | 0.814459 |
| 201 | C9  | PX      | RYD | 0.003582 |
| 202 | C9  | PY      | MIN | 1.119362 |
| 203 | C9  | PY      | RYD | 0.003414 |
| 204 | C9  | PZ      | MIN | 1.206820 |
| 205 | C9  | PZ      | RYD | 0.000454 |
| 206 | C9  | DXY     | RYD | 0.002107 |
| 207 | C9  | DXZ     | RYD | 0.002936 |
| 208 | C9  | DYZ     | RYD | 0.000667 |
| 209 | C9  | DXX-YY  | RYD | 0.002293 |
| 210 | C9  | D3ZZ-RR | RYD | 0.002076 |
| 211 | H3  | S       | MIN | 0.783083 |
| 212 | H3  | S       | RYD | 0.000419 |
| 213 | H3  | PX      | RYD | 0.000025 |
| 214 | H3  | PY      | RYD | 0.000607 |
| 215 | H3  | PZ      | RYD | 0.000030 |
| 216 | H5  | S       | MIN | 0.806803 |
| 217 | H5  | S       | RYD | 0.001421 |
| 218 | H5  | PX      | RYD | 0.000176 |
| 219 | H5  | PY      | RYD | 0.000059 |
| 220 | H5  | PZ      | RYD | 0.000484 |
| 221 | H7  | S       | MIN | 0.806803 |
| 222 | H7  | S       | RYD | 0.001421 |
| 223 | H7  | PX      | RYD | 0.000176 |
| 224 | H7  | PY      | RYD | 0.000059 |
| 225 | H7  | PZ      | RYD | 0.000484 |

Total MIN occupancy: 83.713120

Total RYD occupancy: 0.286880

Total occupancy: 84.000000

Natural Atomic Populations and Charges

| Atom  | Occupancy | Charge    |
|-------|-----------|-----------|
| ----- | -----     | -----     |
| H1    | 0.761656  | 0.238344  |
| C1    | 6.357838  | -0.357838 |
| C2    | 6.219092  | -0.219092 |
| C3    | 6.094699  | -0.094699 |
| C4    | 5.602160  | 0.397840  |
| C5    | 6.227136  | -0.227136 |
| C6    | 5.726786  | 0.273214  |
| C7    | 6.220977  | -0.220977 |
| O1    | 8.605530  | -0.605530 |
| H4    | 0.750640  | 0.249360  |
| N1    | 7.513248  | -0.513248 |
| H6    | 0.750114  | 0.249886  |
| C8    | 5.897425  | 0.102575  |
| H8    | 0.763672  | 0.236328  |
| C10   | 6.314904  | -0.314904 |
| H16   | 0.784041  | 0.215959  |
| H18   | 0.767560  | 0.232440  |
| C9    | 6.240471  | -0.240471 |
| H3    | 0.784165  | 0.215835  |
| H5    | 0.808943  | 0.191057  |
| H7    | 0.808943  | 0.191057  |

Total Charge = 0.000000

Q-minus(NAO) = -0.6055

Q-plus(NAO) = 0.2499

Reason for exit: Normal completion

Wall Time: 000:00:00

CPU Time: 000:00:00

TITAN Properties Program: (PC/x86)

Release 6.0.2

Closed-Shell Molecular Orbital Coefficients

| MO:          |    | 1          | 2          | 3          | 4          | 5          |
|--------------|----|------------|------------|------------|------------|------------|
| Eigenvalues: |    | -20.60019  | -15.54147  | -11.31105  | -11.28860  | -11.27098  |
| (ev):        |    | -560.55981 | -422.90511 | -307.78945 | -307.17847 | -306.69918 |
|              |    | A          | A          | A          | A          | A          |
| 1 H1         | S  | -0.00001   | -0.00005   | 0.00007    | 0.00003    | -0.00006   |
| 2 H1         | S  | -0.00020   | -0.00039   | -0.00029   | 0.00013    | -0.00068   |
| 3 H1         | PX | 0.00001    | 0.00000    | -0.00013   | -0.00001   | 0.00000    |
| 4 H1         | PY | 0.00002    | 0.00001    | 0.00003    | 0.00002    | 0.00004    |
| 5 H1         | PZ | 0.00000    | 0.00000    | 0.00000    | 0.00000    | 0.00000    |

|    |    |     |          |          |          |          |          |
|----|----|-----|----------|----------|----------|----------|----------|
| 6  | C1 | S   | 0.00002  | 0.00003  | 0.00919  | 0.00000  | 0.00007  |
| 7  | C1 | S   | 0.00013  | 0.00012  | 0.00016  | 0.00016  | 0.00031  |
| 8  | C1 | PX  | 0.00001  | -0.00003 | 0.00008  | 0.00000  | -0.00008 |
| 9  | C1 | PY  | -0.00003 | -0.00001 | 0.00005  | -0.00012 | -0.00006 |
| 10 | C1 | PZ  | 0.00000  | 0.00000  | 0.00000  | 0.00000  | 0.00000  |
| 11 | C1 | S   | -0.00169 | -0.00136 | 0.00161  | -0.00311 | -0.00240 |
| 12 | C1 | PX  | 0.00083  | 0.00120  | -0.00013 | 0.00049  | 0.00174  |
| 13 | C1 | PY  | -0.00028 | 0.00004  | 0.00003  | 0.00039  | 0.00018  |
| 14 | C1 | PZ  | 0.00000  | 0.00000  | 0.00000  | 0.00000  | 0.00000  |
| 15 | C1 | DXX | 0.00002  | 0.00000  | -0.00037 | 0.00004  | -0.00005 |
| 16 | C1 | DYY | -0.00010 | 0.00002  | -0.00038 | -0.00013 | -0.00006 |
| 17 | C1 | DZZ | 0.00002  | 0.00006  | -0.00002 | 0.00001  | 0.00014  |
| 18 | C1 | DXY | 0.00005  | 0.00000  | -0.00004 | 0.00002  | 0.00002  |
| 19 | C1 | DXZ | 0.00000  | 0.00000  | 0.00000  | 0.00000  | 0.00000  |
| 20 | C1 | DYZ | 0.00000  | 0.00000  | 0.00000  | 0.00000  | 0.00000  |
| 21 | C2 | S   | 0.00001  | -0.00002 | -0.00026 | 0.00004  | -0.01405 |
| 22 | C2 | S   | 0.00003  | -0.00005 | -0.00052 | 0.00016  | -0.00066 |
| 23 | C2 | PX  | 0.00001  | -0.00001 | -0.00007 | 0.00001  | 0.00014  |
| 24 | C2 | PY  | 0.00000  | 0.00004  | -0.00004 | -0.00006 | -0.00001 |
| 25 | C2 | PZ  | 0.00000  | 0.00000  | 0.00000  | 0.00000  | 0.00000  |
| 26 | C2 | S   | -0.00023 | 0.00058  | 0.00426  | -0.00241 | -0.00107 |
| 27 | C2 | PX  | 0.00007  | 0.00032  | 0.00295  | -0.00124 | -0.00053 |
| 28 | C2 | PY  | -0.00030 | -0.00064 | 0.00034  | -0.00086 | -0.00083 |
| 29 | C2 | PZ  | 0.00000  | 0.00000  | 0.00000  | 0.00000  | 0.00000  |
| 30 | C2 | DXX | 0.00000  | -0.00013 | 0.00005  | 0.00000  | 0.00055  |
| 31 | C2 | DYY | 0.00001  | 0.00003  | 0.00018  | -0.00003 | 0.00055  |
| 32 | C2 | DZZ | 0.00001  | -0.00002 | -0.00021 | 0.00005  | 0.00010  |
| 33 | C2 | DXY | -0.00001 | -0.00002 | 0.00001  | -0.00002 | -0.00027 |
| 34 | C2 | DXZ | 0.00000  | 0.00000  | 0.00000  | 0.00000  | 0.00000  |
| 35 | C2 | DYZ | 0.00000  | 0.00000  | 0.00000  | 0.00000  | 0.00000  |
| 36 | C3 | S   | 0.00000  | -0.00001 | -0.00040 | -0.00002 | -0.01165 |
| 37 | C3 | S   | 0.00000  | 0.00002  | -0.00014 | -0.00006 | -0.00028 |
| 38 | C3 | PX  | 0.00002  | -0.00003 | 0.00012  | 0.00001  | -0.00004 |
| 39 | C3 | PY  | 0.00000  | -0.00003 | -0.00019 | -0.00007 | -0.00002 |
| 40 | C3 | PZ  | 0.00000  | 0.00000  | 0.00000  | 0.00000  | 0.00000  |
| 41 | C3 | S   | -0.00012 | 0.00005  | -0.00315 | -0.00002 | -0.00731 |
| 42 | C3 | PX  | -0.00034 | -0.00120 | -0.00315 | 0.00013  | 0.00169  |
| 43 | C3 | PY  | 0.00070  | 0.00083  | 0.00468  | 0.00225  | 0.00292  |
| 44 | C3 | PZ  | 0.00000  | 0.00000  | 0.00000  | 0.00000  | 0.00000  |
| 45 | C3 | DXX | 0.00000  | -0.00002 | 0.00005  | -0.00005 | 0.00047  |
| 46 | C3 | DYY | 0.00001  | -0.00006 | 0.00009  | 0.00005  | 0.00036  |
| 47 | C3 | DZZ | 0.00000  | 0.00001  | -0.00004 | -0.00003 | 0.00018  |
| 48 | C3 | DXY | 0.00002  | 0.00005  | 0.00000  | 0.00003  | 0.00020  |
| 49 | C3 | DXZ | 0.00000  | 0.00000  | 0.00000  | 0.00000  | 0.00000  |
| 50 | C3 | DYZ | 0.00000  | 0.00000  | 0.00000  | 0.00000  | 0.00000  |
| 51 | C4 | S   | -0.00001 | -0.00001 | 0.99568  | 0.00071  | -0.00010 |
| 52 | C4 | S   | 0.00031  | -0.00007 | 0.02680  | -0.00021 | -0.00015 |
| 53 | C4 | PX  | 0.00000  | 0.00000  | -0.00004 | -0.00014 | -0.00002 |
| 54 | C4 | PY  | 0.00033  | -0.00001 | 0.00124  | -0.00006 | -0.00004 |
| 55 | C4 | PZ  | 0.00000  | 0.00000  | 0.00000  | 0.00000  | 0.00000  |
| 56 | C4 | S   | 0.00105  | 0.00170  | -0.00590 | 0.00034  | 0.00314  |
| 57 | C4 | PX  | 0.00094  | 0.00008  | 0.00006  | 0.00309  | 0.00002  |
| 58 | C4 | PY  | -0.00073 | -0.00055 | 0.00413  | 0.00151  | -0.00112 |
| 59 | C4 | PZ  | 0.00000  | 0.00000  | 0.00000  | 0.00000  | 0.00000  |

|     |    |     |          |          |          |          |          |
|-----|----|-----|----------|----------|----------|----------|----------|
| 60  | C4 | DXX | 0.00001  | 0.00001  | -0.00131 | 0.00006  | 0.00006  |
| 61  | C4 | DYY | -0.00011 | 0.00002  | -0.00063 | 0.00024  | 0.00008  |
| 62  | C4 | DZZ | -0.00009 | -0.00002 | -0.00235 | -0.00006 | -0.00002 |
| 63  | C4 | DXY | -0.00002 | 0.00000  | -0.00018 | 0.00003  | 0.00001  |
| 64  | C4 | DXZ | 0.00000  | 0.00000  | 0.00000  | 0.00000  | 0.00000  |
| 65  | C4 | DYZ | 0.00000  | 0.00000  | 0.00000  | 0.00000  | 0.00000  |
| 66  | C5 | S   | -0.00001 | 0.00002  | 0.00599  | 0.00001  | 0.00044  |
| 67  | C5 | S   | 0.00003  | 0.00007  | 0.00048  | -0.00021 | 0.00044  |
| 68  | C5 | PX  | 0.00000  | 0.00003  | -0.00002 | 0.00004  | 0.00009  |
| 69  | C5 | PY  | 0.00002  | -0.00003 | -0.00003 | 0.00009  | -0.00011 |
| 70  | C5 | PZ  | 0.00000  | 0.00000  | 0.00000  | 0.00000  | 0.00000  |
| 71  | C5 | S   | 0.00061  | -0.00036 | 0.00017  | 0.00393  | -0.00080 |
| 72  | C5 | PX  | -0.00022 | -0.00077 | 0.00025  | 0.00137  | -0.00177 |
| 73  | C5 | PY  | -0.00018 | 0.00028  | 0.00074  | -0.00141 | 0.00094  |
| 74  | C5 | PZ  | 0.00000  | 0.00000  | 0.00000  | 0.00000  | 0.00000  |
| 75  | C5 | DXX | -0.00005 | 0.00001  | -0.00051 | -0.00001 | -0.00005 |
| 76  | C5 | DYY | -0.00003 | 0.00002  | -0.00044 | 0.00004  | -0.00013 |
| 77  | C5 | DZZ | -0.00002 | 0.00005  | -0.00008 | -0.00007 | 0.00016  |
| 78  | C5 | DXY | -0.00005 | -0.00002 | -0.00028 | 0.00002  | 0.00000  |
| 79  | C5 | DXZ | 0.00000  | 0.00000  | 0.00000  | 0.00000  | 0.00000  |
| 80  | C5 | DYZ | 0.00000  | 0.00000  | 0.00000  | 0.00000  | 0.00000  |
| 81  | C6 | S   | 0.00000  | -0.00005 | -0.00005 | -0.00003 | -0.99550 |
| 82  | C6 | S   | 0.00002  | -0.00028 | 0.00015  | -0.00005 | -0.02755 |
| 83  | C6 | PX  | -0.00001 | -0.00002 | -0.00003 | -0.00002 | -0.00007 |
| 84  | C6 | PY  | 0.00001  | -0.00011 | 0.00004  | -0.00001 | 0.00016  |
| 85  | C6 | PZ  | 0.00000  | 0.00000  | 0.00000  | 0.00000  | 0.00000  |
| 86  | C6 | S   | -0.00016 | -0.00438 | -0.00240 | 0.00110  | 0.00835  |
| 87  | C6 | PX  | 0.00011  | -0.00032 | 0.00124  | 0.00018  | 0.00333  |
| 88  | C6 | PY  | -0.00030 | 0.00147  | -0.00380 | 0.00049  | 0.00370  |
| 89  | C6 | PZ  | 0.00000  | 0.00000  | 0.00000  | 0.00000  | 0.00000  |
| 90  | C6 | DXX | 0.00000  | 0.00003  | 0.00000  | 0.00003  | 0.00176  |
| 91  | C6 | DYY | 0.00000  | 0.00065  | -0.00007 | -0.00002 | 0.00099  |
| 92  | C6 | DZZ | 0.00001  | 0.00003  | 0.00001  | -0.00001 | 0.00243  |
| 93  | C6 | DXY | 0.00000  | 0.00001  | 0.00001  | -0.00004 | 0.00018  |
| 94  | C6 | DXZ | 0.00000  | 0.00000  | 0.00000  | 0.00000  | 0.00000  |
| 95  | C6 | DYZ | 0.00000  | 0.00000  | 0.00000  | 0.00000  | 0.00000  |
| 96  | C7 | S   | 0.00000  | -0.00002 | -0.00009 | -0.00001 | 0.00121  |
| 97  | C7 | S   | -0.00003 | -0.00006 | -0.00035 | -0.00006 | -0.00028 |
| 98  | C7 | PX  | 0.00000  | -0.00004 | -0.00003 | 0.00000  | 0.00006  |
| 99  | C7 | PY  | 0.00002  | -0.00004 | 0.00006  | 0.00005  | -0.00002 |
| 100 | C7 | PZ  | 0.00000  | 0.00000  | 0.00000  | 0.00000  | 0.00000  |
| 101 | C7 | S   | 0.00078  | 0.00171  | 0.00671  | 0.00146  | 0.00615  |
| 102 | C7 | PX  | -0.00038 | -0.00124 | -0.00256 | -0.00093 | -0.00422 |
| 103 | C7 | PY  | 0.00008  | 0.00079  | 0.00184  | 0.00008  | 0.00002  |
| 104 | C7 | PZ  | 0.00000  | 0.00000  | 0.00000  | 0.00000  | 0.00000  |
| 105 | C7 | DXX | 0.00000  | -0.00001 | -0.00001 | 0.00002  | -0.00010 |
| 106 | C7 | DYY | 0.00001  | 0.00000  | 0.00007  | 0.00000  | -0.00004 |
| 107 | C7 | DZZ | -0.00001 | -0.00001 | -0.00012 | -0.00001 | -0.00016 |
| 108 | C7 | DXY | 0.00000  | 0.00002  | 0.00001  | -0.00001 | 0.00008  |
| 109 | C7 | DXZ | 0.00000  | 0.00000  | 0.00000  | 0.00000  | 0.00000  |
| 110 | C7 | DYZ | 0.00000  | 0.00000  | 0.00000  | 0.00000  | 0.00000  |
| 111 | O1 | S   | 0.99462  | 0.00000  | 0.00000  | -0.00011 | 0.00001  |
| 112 | O1 | S   | 0.02130  | 0.00002  | 0.00116  | 0.00043  | 0.00006  |
| 113 | O1 | PX  | 0.00106  | 0.00001  | 0.00000  | 0.00027  | 0.00001  |

|     |    |     |          |          |          |          |          |
|-----|----|-----|----------|----------|----------|----------|----------|
| 114 | O1 | PY  | -0.00076 | -0.00001 | -0.00026 | 0.00004  | -0.00002 |
| 115 | O1 | PZ  | 0.00000  | 0.00000  | 0.00000  | 0.00000  | 0.00000  |
| 116 | O1 | S   | 0.00409  | -0.00009 | -0.00476 | -0.00013 | -0.00018 |
| 117 | O1 | PX  | -0.00088 | -0.00003 | 0.00023  | -0.00118 | -0.00003 |
| 118 | O1 | PY  | 0.00026  | 0.00009  | 0.00320  | 0.00029  | 0.00022  |
| 119 | O1 | PZ  | 0.00000  | 0.00000  | 0.00000  | 0.00000  | 0.00000  |
| 120 | O1 | DXX | -0.00419 | 0.00002  | 0.00051  | -0.00058 | 0.00005  |
| 121 | O1 | DYY | -0.00417 | -0.00001 | -0.00067 | -0.00018 | -0.00002 |
| 122 | O1 | DZZ | -0.00394 | 0.00002  | 0.00080  | 0.00025  | 0.00005  |
| 123 | O1 | DXY | -0.00007 | 0.00000  | -0.00015 | -0.00032 | 0.00000  |
| 124 | O1 | DXZ | 0.00000  | 0.00000  | 0.00000  | 0.00000  | 0.00000  |
| 125 | O1 | DYZ | 0.00000  | 0.00000  | 0.00000  | 0.00000  | 0.00000  |
| 126 | H4 | S   | 0.00002  | -0.00006 | -0.00007 | 0.00008  | -0.00012 |
| 127 | H4 | S   | -0.00019 | -0.00028 | -0.00006 | 0.00042  | -0.00085 |
| 128 | H4 | PX  | -0.00001 | 0.00000  | 0.00006  | 0.00001  | 0.00003  |
| 129 | H4 | PY  | 0.00003  | 0.00002  | -0.00005 | 0.00002  | 0.00002  |
| 130 | H4 | PZ  | 0.00000  | 0.00000  | 0.00000  | 0.00000  | 0.00000  |
| 131 | N1 | S   | 0.00000  | -0.99524 | 0.00001  | -0.00001 | 0.00032  |
| 132 | N1 | S   | 0.00000  | -0.02514 | 0.00002  | -0.00002 | -0.00071 |
| 133 | N1 | PX  | 0.00000  | -0.00166 | 0.00001  | -0.00002 | 0.00008  |
| 134 | N1 | PY  | 0.00000  | -0.00131 | -0.00003 | 0.00001  | -0.00007 |
| 135 | N1 | PZ  | 0.00000  | 0.00000  | 0.00000  | 0.00000  | 0.00000  |
| 136 | N1 | S   | -0.00010 | 0.00724  | -0.00108 | 0.00018  | 0.00525  |
| 137 | N1 | PX  | 0.00005  | 0.00263  | 0.00009  | 0.00010  | 0.00106  |
| 138 | N1 | PY  | -0.00005 | 0.00147  | -0.00026 | 0.00001  | 0.00232  |
| 139 | N1 | PZ  | 0.00000  | 0.00000  | 0.00000  | 0.00000  | 0.00000  |
| 140 | N1 | DXX | 0.00001  | 0.00291  | 0.00005  | 0.00000  | 0.00014  |
| 141 | N1 | DYY | 0.00000  | 0.00252  | 0.00003  | 0.00000  | 0.00013  |
| 142 | N1 | DZZ | 0.00000  | 0.00308  | -0.00001 | -0.00002 | -0.00047 |
| 143 | N1 | DXY | 0.00000  | -0.00012 | -0.00001 | 0.00000  | 0.00004  |
| 144 | N1 | DXZ | 0.00000  | 0.00000  | 0.00000  | 0.00000  | 0.00000  |
| 145 | N1 | DYZ | 0.00000  | 0.00000  | 0.00000  | 0.00000  | 0.00000  |
| 146 | H6 | S   | 0.00001  | -0.00001 | 0.00008  | -0.00003 | -0.00007 |
| 147 | H6 | S   | 0.00001  | 0.00002  | 0.00096  | -0.00035 | -0.00021 |
| 148 | H6 | PX  | 0.00000  | 0.00002  | -0.00001 | 0.00000  | -0.00010 |
| 149 | H6 | PY  | 0.00001  | 0.00005  | 0.00002  | 0.00002  | 0.00000  |
| 150 | H6 | PZ  | 0.00000  | 0.00000  | 0.00000  | 0.00000  | 0.00000  |
| 151 | C8 | S   | 0.00000  | -0.00001 | 0.00004  | 0.00000  | -0.00040 |
| 152 | C8 | S   | 0.00002  | -0.00038 | 0.00013  | 0.00000  | 0.00030  |
| 153 | C8 | PX  | 0.00000  | 0.00016  | -0.00006 | 0.00000  | 0.00010  |
| 154 | C8 | PY  | 0.00000  | -0.00008 | 0.00005  | -0.00003 | 0.00005  |
| 155 | C8 | PZ  | 0.00000  | 0.00000  | 0.00000  | 0.00000  | 0.00000  |
| 156 | C8 | S   | -0.00029 | -0.00284 | -0.00122 | -0.00071 | -0.00342 |
| 157 | C8 | PX  | -0.00006 | 0.00211  | 0.00006  | -0.00023 | 0.00031  |
| 158 | C8 | PY  | -0.00023 | -0.00161 | -0.00227 | 0.00013  | -0.00500 |
| 159 | C8 | PZ  | 0.00000  | 0.00000  | 0.00000  | 0.00000  | 0.00000  |
| 160 | C8 | DXX | -0.00001 | 0.00030  | -0.00001 | -0.00001 | -0.00018 |
| 161 | C8 | DYY | 0.00000  | 0.00009  | -0.00001 | 0.00000  | -0.00009 |
| 162 | C8 | DZZ | 0.00001  | 0.00009  | 0.00004  | 0.00000  | 0.00005  |
| 163 | C8 | DXY | -0.00001 | -0.00014 | -0.00003 | -0.00001 | 0.00009  |
| 164 | C8 | DXZ | 0.00000  | 0.00000  | 0.00000  | 0.00000  | 0.00000  |
| 165 | C8 | DYZ | 0.00000  | 0.00000  | 0.00000  | 0.00000  | 0.00000  |
| 166 | H8 | S   | 0.00001  | 0.00007  | -0.00003 | 0.00003  | 0.00016  |
| 167 | H8 | S   | 0.00009  | 0.00039  | 0.00053  | 0.00027  | 0.00119  |



|     |     |     |          |          |          |          |          |
|-----|-----|-----|----------|----------|----------|----------|----------|
| 168 | H8  | PX  | 0.00000  | -0.00001 | 0.00000  | 0.00000  | -0.00002 |
| 169 | H8  | PY  | 0.00000  | -0.00002 | -0.00006 | 0.00000  | 0.00001  |
| 170 | H8  | PZ  | 0.00000  | 0.00000  | 0.00000  | 0.00000  | 0.00000  |
| 171 | C10 | S   | 0.00000  | -0.00001 | -0.00001 | 0.00000  | 0.00000  |
| 172 | C10 | S   | 0.00000  | 0.00000  | 0.00000  | -0.00002 | -0.00003 |
| 173 | C10 | PX  | 0.00000  | 0.00000  | -0.00003 | -0.00001 | 0.00006  |
| 174 | C10 | PY  | 0.00000  | 0.00000  | -0.00006 | 0.00001  | -0.00008 |
| 175 | C10 | PZ  | 0.00000  | 0.00000  | 0.00000  | 0.00000  | 0.00000  |
| 176 | C10 | S   | -0.00007 | -0.00063 | -0.00124 | 0.00036  | -0.00255 |
| 177 | C10 | PX  | 0.00007  | -0.00071 | 0.00049  | 0.00006  | 0.00015  |
| 178 | C10 | PY  | -0.00001 | -0.00027 | -0.00027 | 0.00019  | -0.00075 |
| 179 | C10 | PZ  | 0.00000  | 0.00000  | 0.00000  | 0.00000  | 0.00000  |
| 180 | C10 | DXX | 0.00000  | -0.00002 | -0.00003 | 0.00000  | -0.00007 |
| 181 | C10 | DYY | 0.00000  | -0.00005 | -0.00001 | 0.00001  | 0.00002  |
| 182 | C10 | DZZ | 0.00000  | 0.00001  | -0.00002 | 0.00000  | -0.00003 |
| 183 | C10 | DXY | 0.00000  | -0.00011 | 0.00000  | 0.00000  | 0.00002  |
| 184 | C10 | DXZ | 0.00000  | 0.00000  | 0.00000  | 0.00000  | 0.00000  |
| 185 | C10 | DYZ | 0.00000  | 0.00000  | 0.00000  | 0.00000  | 0.00000  |
| 186 | H16 | S   | -0.00001 | 0.00005  | -0.00004 | -0.00002 | 0.00006  |
| 187 | H16 | S   | -0.00003 | 0.00029  | -0.00008 | -0.00003 | 0.00008  |
| 188 | H16 | PX  | 0.00000  | 0.00001  | -0.00001 | 0.00000  | -0.00003 |
| 189 | H16 | PY  | 0.00000  | 0.00000  | 0.00000  | 0.00000  | 0.00001  |
| 190 | H16 | PZ  | 0.00000  | 0.00000  | 0.00000  | 0.00000  | 0.00000  |
| 191 | H18 | S   | 0.00001  | -0.00003 | 0.00006  | 0.00000  | -0.00001 |
| 192 | H18 | S   | 0.00002  | -0.00020 | 0.00020  | 0.00004  | 0.00009  |
| 193 | H18 | PX  | 0.00000  | 0.00003  | 0.00001  | 0.00000  | 0.00002  |
| 194 | H18 | PY  | 0.00000  | 0.00002  | 0.00001  | 0.00000  | 0.00000  |
| 195 | H18 | PZ  | 0.00000  | 0.00000  | 0.00000  | 0.00000  | 0.00000  |
| 196 | C9  | S   | 0.00000  | 0.00000  | -0.00071 | 0.99583  | -0.00002 |
| 197 | C9  | S   | 0.00025  | 0.00001  | -0.00018 | 0.02763  | 0.00000  |
| 198 | C9  | PX  | -0.00038 | -0.00001 | -0.00004 | -0.00097 | -0.00001 |
| 199 | C9  | PY  | -0.00017 | 0.00000  | -0.00001 | -0.00069 | 0.00000  |
| 200 | C9  | PZ  | 0.00000  | 0.00000  | 0.00000  | 0.00000  | 0.00000  |
| 201 | C9  | S   | 0.00016  | -0.00002 | -0.00022 | -0.01224 | -0.00003 |
| 202 | C9  | PX  | 0.00021  | 0.00001  | 0.00029  | -0.00044 | 0.00004  |
| 203 | C9  | PY  | -0.00015 | -0.00001 | -0.00074 | 0.00088  | -0.00009 |
| 204 | C9  | PZ  | 0.00000  | 0.00000  | 0.00000  | 0.00000  | 0.00000  |
| 205 | C9  | DXX | 0.00008  | 0.00000  | 0.00002  | -0.00138 | -0.00001 |
| 206 | C9  | DYY | 0.00004  | 0.00001  | 0.00020  | -0.00148 | 0.00001  |
| 207 | C9  | DZZ | 0.00003  | 0.00001  | 0.00005  | -0.00156 | 0.00001  |
| 208 | C9  | DXY | 0.00005  | 0.00000  | 0.00015  | 0.00006  | 0.00001  |
| 209 | C9  | DXZ | 0.00000  | 0.00000  | 0.00000  | 0.00000  | 0.00000  |
| 210 | C9  | DYZ | 0.00000  | 0.00000  | 0.00000  | 0.00000  | 0.00000  |
| 211 | H3  | S   | -0.00001 | 0.00000  | 0.00009  | -0.00007 | 0.00001  |
| 212 | H3  | S   | -0.00004 | 0.00000  | 0.00025  | 0.00182  | 0.00005  |
| 213 | H3  | PX  | 0.00003  | 0.00000  | 0.00004  | -0.00001 | 0.00000  |
| 214 | H3  | PY  | 0.00007  | 0.00000  | 0.00006  | 0.00014  | 0.00000  |
| 215 | H3  | PZ  | 0.00000  | 0.00000  | 0.00000  | 0.00000  | 0.00000  |
| 216 | H5  | S   | -0.00007 | 0.00000  | -0.00009 | 0.00013  | -0.00001 |
| 217 | H5  | S   | -0.00013 | 0.00001  | -0.00001 | 0.00251  | 0.00002  |
| 218 | H5  | PX  | 0.00004  | 0.00000  | -0.00003 | 0.00007  | 0.00000  |
| 219 | H5  | PY  | 0.00002  | 0.00000  | 0.00005  | -0.00007 | 0.00000  |
| 220 | H5  | PZ  | -0.00004 | 0.00000  | -0.00001 | -0.00006 | 0.00000  |
| 221 | H7  | S   | -0.00007 | 0.00000  | -0.00009 | 0.00013  | -0.00001 |

|     |    |    |          |         |          |          |         |
|-----|----|----|----------|---------|----------|----------|---------|
| 222 | H7 | S  | -0.00013 | 0.00001 | -0.00001 | 0.00251  | 0.00002 |
| 223 | H7 | PX | 0.00004  | 0.00000 | -0.00003 | 0.00007  | 0.00000 |
| 224 | H7 | PY | 0.00002  | 0.00000 | 0.00005  | -0.00007 | 0.00000 |
| 225 | H7 | PZ | 0.00004  | 0.00000 | 0.00001  | 0.00006  | 0.00000 |

|              |  |            |            |            |            |            |
|--------------|--|------------|------------|------------|------------|------------|
| MO:          |  | 6          | 7          | 8          | 9          | 10         |
| Eigenvalues: |  | -11.25727  | -11.24891  | -11.24274  | -11.24199  | -11.23919  |
| (ev):        |  | -306.32603 | -306.09843 | -305.93066 | -305.91030 | -305.83416 |

|    |    |     |          |          |          |          |          |
|----|----|-----|----------|----------|----------|----------|----------|
|    |    | A   | A        | A        | A        | A        |          |
| 1  | H1 | S   | 0.00007  | -0.00007 | 0.00000  | -0.00004 | -0.00004 |
| 2  | H1 | S   | 0.00072  | -0.00076 | 0.00002  | -0.00079 | -0.00029 |
| 3  | H1 | PX  | 0.00000  | -0.00001 | 0.00000  | -0.00003 | -0.00010 |
| 4  | H1 | PY  | -0.00003 | -0.00002 | 0.00001  | -0.00001 | 0.00000  |
| 5  | H1 | PZ  | 0.00000  | 0.00000  | 0.00000  | 0.00000  | 0.00000  |
| 6  | C1 | S   | -0.00006 | 0.00151  | 0.00001  | -0.00018 | 0.03839  |
| 7  | C1 | S   | -0.00015 | 0.00042  | -0.00005 | 0.00039  | 0.00120  |
| 8  | C1 | PX  | 0.00004  | -0.00004 | 0.00000  | 0.00000  | 0.00005  |
| 9  | C1 | PY  | 0.00004  | -0.00004 | 0.00000  | 0.00004  | 0.00022  |
| 10 | C1 | PZ  | 0.00000  | 0.00000  | 0.00000  | 0.00000  | 0.00000  |
| 11 | C1 | S   | 0.00158  | -0.00395 | 0.00045  | -0.00657 | 0.00164  |
| 12 | C1 | PX  | -0.00210 | 0.00227  | -0.00015 | 0.00303  | 0.00048  |
| 13 | C1 | PY  | 0.00055  | 0.00105  | -0.00017 | 0.00130  | -0.00106 |
| 14 | C1 | PZ  | 0.00000  | 0.00000  | 0.00000  | 0.00000  | 0.00000  |
| 15 | C1 | DXX | 0.00000  | -0.00013 | -0.00001 | -0.00008 | -0.00045 |
| 16 | C1 | DYY | -0.00006 | -0.00012 | 0.00002  | -0.00008 | -0.00082 |
| 17 | C1 | DZZ | -0.00007 | 0.00014  | -0.00002 | 0.00012  | -0.00022 |
| 18 | C1 | DXY | -0.00001 | 0.00004  | 0.00000  | -0.00002 | -0.00017 |
| 19 | C1 | DXZ | 0.00000  | 0.00000  | 0.00000  | 0.00000  | 0.00000  |
| 20 | C1 | DYZ | 0.00000  | 0.00000  | 0.00000  | 0.00000  | 0.00000  |
| 21 | C2 | S   | 0.00024  | -0.11731 | 0.00107  | 0.98857  | 0.00315  |
| 22 | C2 | S   | 0.00012  | -0.00312 | 0.00003  | 0.02750  | -0.00008 |
| 23 | C2 | PX  | 0.00003  | 0.00003  | 0.00001  | 0.00033  | -0.00004 |
| 24 | C2 | PY  | -0.00007 | 0.00016  | -0.00001 | 0.00003  | 0.00000  |
| 25 | C2 | PZ  | 0.00000  | 0.00000  | 0.00000  | 0.00000  | 0.00000  |
| 26 | C2 | S   | -0.00051 | -0.00008 | 0.00000  | -0.01013 | 0.00102  |
| 27 | C2 | PX  | -0.00074 | 0.00054  | -0.00001 | -0.00046 | 0.00065  |
| 28 | C2 | PY  | -0.00083 | -0.00066 | -0.00026 | -0.00021 | 0.00034  |
| 29 | C2 | PZ  | 0.00000  | 0.00000  | 0.00000  | 0.00000  | 0.00000  |
| 30 | C2 | DXX | -0.00001 | 0.00064  | 0.00000  | -0.00155 | 0.00008  |
| 31 | C2 | DYY | 0.00004  | 0.00054  | 0.00001  | -0.00141 | 0.00006  |
| 32 | C2 | DZZ | 0.00006  | 0.00032  | 0.00000  | -0.00246 | -0.00006 |
| 33 | C2 | DXY | 0.00003  | 0.00000  | -0.00001 | 0.00013  | -0.00002 |
| 34 | C2 | DXZ | 0.00000  | 0.00000  | 0.00000  | 0.00000  | 0.00000  |
| 35 | C2 | DYZ | 0.00000  | 0.00000  | 0.00000  | 0.00000  | 0.00000  |
| 36 | C3 | S   | -0.00036 | 0.00037  | 0.00043  | -0.00331 | 0.98854  |
| 37 | C3 | S   | 0.00009  | -0.00006 | 0.00007  | -0.00020 | 0.02762  |
| 38 | C3 | PX  | -0.00005 | -0.00001 | 0.00001  | 0.00007  | -0.00019 |
| 39 | C3 | PY  | -0.00006 | -0.00003 | 0.00004  | -0.00013 | 0.00005  |
| 40 | C3 | PZ  | 0.00000  | 0.00000  | 0.00000  | 0.00000  | 0.00000  |
| 41 | C3 | S   | -0.00293 | 0.00105  | -0.00167 | -0.00070 | -0.01350 |
| 42 | C3 | PX  | 0.00324  | -0.00119 | -0.00021 | -0.00124 | 0.00071  |
| 43 | C3 | PY  | 0.00072  | 0.00328  | 0.00050  | 0.00582  | 0.00114  |

|    |    |     |          |          |          |          |          |
|----|----|-----|----------|----------|----------|----------|----------|
| 44 | C3 | PZ  | 0.00000  | 0.00000  | 0.00000  | 0.00000  | 0.00000  |
| 45 | C3 | DXX | -0.00003 | 0.00001  | 0.00001  | 0.00007  | -0.00182 |
| 46 | C3 | DYY | 0.00020  | 0.00006  | -0.00004 | 0.00007  | -0.00118 |
| 47 | C3 | DZZ | 0.00009  | 0.00001  | 0.00001  | -0.00001 | -0.00234 |
| 48 | C3 | DXY | -0.00007 | 0.00001  | 0.00000  | 0.00004  | -0.00015 |
| 49 | C3 | DXZ | 0.00000  | 0.00000  | 0.00000  | 0.00000  | 0.00000  |
| 50 | C3 | DYZ | 0.00000  | 0.00000  | 0.00000  | 0.00000  | 0.00000  |
| 51 | C4 | S   | 0.00000  | 0.00622  | 0.00001  | 0.00089  | -0.00001 |
| 52 | C4 | S   | 0.00012  | -0.00010 | 0.00004  | -0.00028 | -0.00027 |
| 53 | C4 | PX  | 0.00000  | -0.00008 | 0.00000  | 0.00001  | 0.00002  |
| 54 | C4 | PY  | 0.00000  | -0.00004 | 0.00000  | 0.00000  | 0.00003  |
| 55 | C4 | PZ  | 0.00000  | 0.00000  | 0.00000  | 0.00000  | 0.00000  |
| 56 | C4 | S   | -0.00268 | -0.00152 | -0.00021 | 0.00195  | 0.00081  |
| 57 | C4 | PX  | -0.00053 | 0.00173  | -0.00004 | 0.00153  | 0.00006  |
| 58 | C4 | PY  | 0.00130  | -0.00142 | 0.00038  | -0.00268 | -0.00131 |
| 59 | C4 | PZ  | 0.00000  | 0.00000  | 0.00000  | 0.00000  | 0.00000  |
| 60 | C4 | DXX | 0.00000  | 0.00067  | 0.00001  | 0.00012  | 0.00006  |
| 61 | C4 | DYY | -0.00001 | 0.00025  | 0.00001  | 0.00003  | 0.00008  |
| 62 | C4 | DZZ | 0.00004  | 0.00006  | 0.00001  | -0.00007 | -0.00007 |
| 63 | C4 | DXY | 0.00000  | 0.00002  | 0.00000  | 0.00003  | -0.00005 |
| 64 | C4 | DXZ | 0.00000  | 0.00000  | 0.00000  | 0.00000  | 0.00000  |
| 65 | C4 | DYZ | 0.00000  | 0.00000  | 0.00000  | 0.00000  | 0.00000  |
| 66 | C5 | S   | -0.00014 | -0.98859 | -0.00008 | -0.11796 | 0.00004  |
| 67 | C5 | S   | -0.00014 | -0.02735 | -0.00001 | -0.00346 | 0.00003  |
| 68 | C5 | PX  | -0.00002 | -0.00029 | 0.00001  | 0.00004  | -0.00004 |
| 69 | C5 | PY  | 0.00005  | 0.00001  | 0.00001  | 0.00018  | 0.00003  |
| 70 | C5 | PZ  | 0.00000  | 0.00000  | 0.00000  | 0.00000  | 0.00000  |
| 71 | C5 | S   | 0.00160  | 0.01017  | 0.00029  | 0.00455  | -0.00095 |
| 72 | C5 | PX  | 0.00073  | 0.00075  | 0.00002  | -0.00013 | -0.00026 |
| 73 | C5 | PY  | -0.00113 | 0.00058  | -0.00020 | -0.00038 | 0.00058  |
| 74 | C5 | PZ  | 0.00000  | 0.00000  | 0.00000  | 0.00000  | 0.00000  |
| 75 | C5 | DXX | 0.00000  | 0.00177  | 0.00000  | -0.00019 | -0.00005 |
| 76 | C5 | DYY | -0.00002 | 0.00140  | 0.00000  | -0.00025 | -0.00004 |
| 77 | C5 | DZZ | -0.00006 | 0.00246  | 0.00000  | 0.00025  | -0.00002 |
| 78 | C5 | DXY | -0.00001 | -0.00007 | 0.00000  | 0.00005  | 0.00001  |
| 79 | C5 | DXZ | 0.00000  | 0.00000  | 0.00000  | 0.00000  | 0.00000  |
| 80 | C5 | DYZ | 0.00000  | 0.00000  | 0.00000  | 0.00000  | 0.00000  |
| 81 | C6 | S   | -0.00046 | 0.00136  | -0.00006 | -0.01430 | -0.01185 |
| 82 | C6 | S   | -0.00039 | 0.00028  | -0.00006 | -0.00024 | -0.00022 |
| 83 | C6 | PX  | -0.00005 | -0.00001 | -0.00004 | 0.00008  | -0.00007 |
| 84 | C6 | PY  | -0.00008 | 0.00009  | 0.00004  | 0.00003  | 0.00002  |
| 85 | C6 | PZ  | 0.00000  | 0.00000  | 0.00000  | 0.00000  | 0.00000  |
| 86 | C6 | S   | 0.00492  | -0.00025 | -0.00007 | 0.00468  | 0.00478  |
| 87 | C6 | PX  | 0.00336  | 0.00005  | 0.00043  | 0.00014  | 0.00194  |
| 88 | C6 | PY  | -0.00061 | -0.00310 | -0.00001 | -0.00259 | -0.00091 |
| 89 | C6 | PZ  | 0.00000  | 0.00000  | 0.00000  | 0.00000  | 0.00000  |
| 90 | C6 | DXX | 0.00008  | 0.00005  | -0.00001 | -0.00041 | -0.00057 |
| 91 | C6 | DYY | 0.00015  | -0.00004 | -0.00001 | -0.00039 | -0.00024 |
| 92 | C6 | DZZ | -0.00010 | 0.00007  | -0.00003 | -0.00006 | -0.00010 |
| 93 | C6 | DXY | -0.00004 | 0.00004  | 0.00003  | 0.00020  | -0.00004 |
| 94 | C6 | DXZ | 0.00000  | 0.00000  | 0.00000  | 0.00000  | 0.00000  |
| 95 | C6 | DYZ | 0.00000  | 0.00000  | 0.00000  | 0.00000  | 0.00000  |
| 96 | C7 | S   | 0.01480  | -0.00004 | 0.00235  | -0.00009 | 0.11103  |
| 97 | C7 | S   | 0.00054  | -0.00009 | 0.00008  | -0.00020 | 0.00281  |

|     |    |     |          |          |          |          |          |
|-----|----|-----|----------|----------|----------|----------|----------|
| 98  | C7 | PX  | 0.00005  | 0.00000  | 0.00004  | -0.00004 | 0.00015  |
| 99  | C7 | PY  | 0.00007  | 0.00003  | -0.00005 | 0.00009  | -0.00016 |
| 100 | C7 | PZ  | 0.00000  | 0.00000  | 0.00000  | 0.00000  | 0.00000  |
| 101 | C7 | S   | 0.00392  | 0.00270  | 0.00149  | 0.00542  | 0.00391  |
| 102 | C7 | PX  | -0.00076 | -0.00124 | -0.00096 | -0.00256 | -0.00115 |
| 103 | C7 | PY  | -0.00278 | 0.00045  | 0.00045  | 0.00076  | 0.00108  |
| 104 | C7 | PZ  | 0.00000  | 0.00000  | 0.00000  | 0.00000  | 0.00000  |
| 105 | C7 | DXX | -0.00062 | 0.00001  | -0.00005 | 0.00005  | -0.00074 |
| 106 | C7 | DYY | -0.00041 | 0.00001  | -0.00009 | 0.00002  | -0.00049 |
| 107 | C7 | DZZ | -0.00014 | -0.00003 | -0.00002 | -0.00005 | -0.00037 |
| 108 | C7 | DXY | -0.00023 | 0.00001  | -0.00007 | -0.00001 | 0.00008  |
| 109 | C7 | DXZ | 0.00000  | 0.00000  | 0.00000  | 0.00000  | 0.00000  |
| 110 | C7 | DYZ | 0.00000  | 0.00000  | 0.00000  | 0.00000  | 0.00000  |
| 111 | O1 | S   | 0.00000  | -0.00005 | 0.00001  | -0.00005 | -0.00003 |
| 112 | O1 | S   | 0.00000  | -0.00010 | 0.00003  | -0.00021 | -0.00013 |
| 113 | O1 | PX  | -0.00001 | -0.00001 | 0.00000  | 0.00003  | 0.00000  |
| 114 | O1 | PY  | 0.00001  | 0.00001  | 0.00000  | 0.00001  | 0.00002  |
| 115 | O1 | PZ  | 0.00000  | 0.00000  | 0.00000  | 0.00000  | 0.00000  |
| 116 | O1 | S   | -0.00015 | 0.00130  | -0.00025 | 0.00160  | 0.00086  |
| 117 | O1 | PX  | 0.00009  | -0.00005 | 0.00001  | -0.00033 | -0.00004 |
| 118 | O1 | PY  | -0.00003 | -0.00029 | 0.00007  | -0.00043 | -0.00027 |
| 119 | O1 | PZ  | 0.00000  | 0.00000  | 0.00000  | 0.00000  | 0.00000  |
| 120 | O1 | DXX | 0.00000  | -0.00020 | 0.00002  | -0.00015 | -0.00010 |
| 121 | O1 | DYY | 0.00002  | -0.00018 | 0.00002  | -0.00013 | -0.00008 |
| 122 | O1 | DZZ | -0.00001 | -0.00006 | 0.00002  | -0.00010 | -0.00008 |
| 123 | O1 | DXY | -0.00001 | -0.00007 | 0.00000  | 0.00004  | -0.00001 |
| 124 | O1 | DXZ | 0.00000  | 0.00000  | 0.00000  | 0.00000  | 0.00000  |
| 125 | O1 | DYZ | 0.00000  | 0.00000  | 0.00000  | 0.00000  | 0.00000  |
| 126 | H4 | S   | 0.00006  | 0.00021  | 0.00000  | 0.00002  | -0.00001 |
| 127 | H4 | S   | 0.00042  | -0.00187 | 0.00004  | -0.00042 | -0.00012 |
| 128 | H4 | PX  | 0.00000  | 0.00017  | 0.00000  | 0.00010  | 0.00001  |
| 129 | H4 | PY  | 0.00000  | -0.00014 | 0.00000  | -0.00016 | -0.00002 |
| 130 | H4 | PZ  | 0.00000  | 0.00000  | 0.00000  | 0.00000  | 0.00000  |
| 131 | N1 | S   | -0.00011 | 0.00004  | -0.00004 | 0.00007  | 0.00009  |
| 132 | N1 | S   | 0.00073  | 0.00017  | 0.00001  | 0.00016  | 0.00025  |
| 133 | N1 | PX  | 0.00005  | -0.00001 | -0.00001 | 0.00005  | 0.00006  |
| 134 | N1 | PY  | -0.00010 | 0.00000  | -0.00004 | -0.00001 | 0.00002  |
| 135 | N1 | PZ  | 0.00000  | 0.00000  | 0.00000  | 0.00000  | 0.00000  |
| 136 | N1 | S   | -0.00348 | -0.00217 | 0.00092  | -0.00301 | -0.00300 |
| 137 | N1 | PX  | -0.00214 | 0.00016  | 0.00018  | -0.00010 | -0.00081 |
| 138 | N1 | PY  | -0.00012 | -0.00084 | 0.00014  | -0.00087 | -0.00048 |
| 139 | N1 | PZ  | 0.00000  | 0.00000  | 0.00000  | 0.00000  | 0.00000  |
| 140 | N1 | DXX | -0.00050 | 0.00011  | -0.00014 | 0.00019  | 0.00020  |
| 141 | N1 | DYY | -0.00003 | 0.00003  | -0.00012 | 0.00017  | 0.00021  |
| 142 | N1 | DZZ | 0.00041  | 0.00008  | -0.00002 | 0.00007  | 0.00018  |
| 143 | N1 | DXY | 0.00011  | 0.00003  | 0.00009  | 0.00001  | 0.00003  |
| 144 | N1 | DXZ | 0.00000  | 0.00000  | 0.00000  | 0.00000  | 0.00000  |
| 145 | N1 | DYZ | 0.00000  | 0.00000  | 0.00000  | 0.00000  | 0.00000  |
| 146 | H6 | S   | -0.00004 | 0.00001  | -0.00001 | -0.00030 | 0.00002  |
| 147 | H6 | S   | -0.00034 | 0.00004  | -0.00003 | 0.00177  | 0.00031  |
| 148 | H6 | PX  | 0.00000  | -0.00010 | 0.00000  | -0.00026 | 0.00000  |
| 149 | H6 | PY  | -0.00001 | -0.00008 | 0.00001  | -0.00007 | -0.00002 |
| 150 | H6 | PZ  | 0.00000  | 0.00000  | 0.00000  | 0.00000  | 0.00000  |
| 151 | C8 | S   | 0.99379  | -0.00007 | 0.05930  | -0.00027 | -0.00132 |

|     |     |     |          |          |          |          |          |
|-----|-----|-----|----------|----------|----------|----------|----------|
| 152 | C8  | S   | 0.02729  | 0.00007  | 0.00197  | 0.00013  | -0.00008 |
| 153 | C8  | PX  | -0.00029 | -0.00003 | 0.00000  | -0.00007 | -0.00002 |
| 154 | C8  | PY  | 0.00028  | 0.00001  | -0.00020 | 0.00005  | 0.00006  |
| 155 | C8  | PZ  | 0.00000  | 0.00000  | 0.00000  | 0.00000  | 0.00000  |
| 156 | C8  | S   | -0.01057 | -0.00080 | -0.00566 | -0.00118 | 0.00029  |
| 157 | C8  | PX  | -0.00396 | -0.00008 | -0.00014 | -0.00048 | -0.00103 |
| 158 | C8  | PY  | -0.00032 | -0.00072 | 0.00107  | -0.00160 | -0.00039 |
| 159 | C8  | PZ  | 0.00000  | 0.00000  | 0.00000  | 0.00000  | 0.00000  |
| 160 | C8  | DXX | -0.00159 | 0.00000  | 0.00027  | -0.00001 | 0.00002  |
| 161 | C8  | DYY | -0.00110 | 0.00001  | 0.00023  | 0.00004  | 0.00014  |
| 162 | C8  | DZZ | -0.00236 | 0.00003  | -0.00003 | 0.00006  | 0.00003  |
| 163 | C8  | DXY | -0.00028 | -0.00001 | 0.00000  | -0.00004 | 0.00000  |
| 164 | C8  | DXZ | 0.00000  | 0.00000  | 0.00000  | 0.00000  | 0.00000  |
| 165 | C8  | DYZ | 0.00000  | 0.00000  | 0.00000  | 0.00000  | 0.00000  |
| 166 | H8  | S   | -0.00007 | 0.00001  | 0.00004  | 0.00002  | -0.00003 |
| 167 | H8  | S   | -0.00030 | 0.00031  | 0.00033  | 0.00060  | 0.00017  |
| 168 | H8  | PX  | -0.00009 | 0.00000  | -0.00001 | 0.00002  | -0.00011 |
| 169 | H8  | PY  | 0.00011  | 0.00000  | -0.00003 | -0.00001 | 0.00001  |
| 170 | H8  | PZ  | 0.00000  | 0.00000  | 0.00000  | 0.00000  | 0.00000  |
| 171 | C10 | S   | 0.05863  | -0.00006 | -0.99390 | 0.00105  | 0.00061  |
| 172 | C10 | S   | 0.00135  | 0.00000  | -0.02744 | 0.00004  | 0.00001  |
| 173 | C10 | PX  | 0.00004  | -0.00002 | -0.00010 | -0.00002 | -0.00002 |
| 174 | C10 | PY  | -0.00025 | -0.00001 | -0.00004 | -0.00004 | -0.00005 |
| 175 | C10 | PZ  | 0.00000  | 0.00000  | 0.00000  | 0.00000  | 0.00000  |
| 176 | C10 | S   | 0.00315  | -0.00028 | 0.01163  | -0.00076 | -0.00023 |
| 177 | C10 | PX  | 0.00125  | 0.00025  | -0.00017 | 0.00053  | 0.00066  |
| 178 | C10 | PY  | 0.00174  | -0.00008 | 0.00101  | -0.00018 | 0.00009  |
| 179 | C10 | PZ  | 0.00000  | 0.00000  | 0.00000  | 0.00000  | 0.00000  |
| 180 | C10 | DXX | -0.00058 | -0.00001 | 0.00167  | -0.00002 | -0.00001 |
| 181 | C10 | DYY | -0.00050 | 0.00000  | 0.00145  | -0.00002 | -0.00002 |
| 182 | C10 | DZZ | -0.00023 | 0.00000  | 0.00256  | 0.00000  | -0.00001 |
| 183 | C10 | DXY | 0.00008  | 0.00001  | 0.00008  | 0.00002  | 0.00005  |
| 184 | C10 | DXZ | 0.00000  | 0.00000  | 0.00000  | 0.00000  | 0.00000  |
| 185 | C10 | DYZ | 0.00000  | 0.00000  | 0.00000  | 0.00000  | 0.00000  |
| 186 | H16 | S   | -0.00010 | -0.00002 | 0.00027  | -0.00004 | -0.00006 |
| 187 | H16 | S   | -0.00052 | -0.00010 | -0.00197 | -0.00017 | -0.00019 |
| 188 | H16 | PX  | -0.00012 | 0.00000  | -0.00028 | 0.00000  | -0.00001 |
| 189 | H16 | PY  | 0.00009  | 0.00000  | 0.00003  | 0.00000  | 0.00000  |
| 190 | H16 | PZ  | 0.00000  | 0.00000  | 0.00000  | 0.00000  | 0.00000  |
| 191 | H18 | S   | 0.00012  | 0.00003  | 0.00022  | 0.00006  | 0.00006  |
| 192 | H18 | S   | 0.00066  | 0.00006  | -0.00194 | 0.00016  | 0.00027  |
| 193 | H18 | PX  | 0.00006  | 0.00000  | 0.00020  | 0.00000  | -0.00001 |
| 194 | H18 | PY  | 0.00013  | 0.00000  | 0.00011  | 0.00000  | 0.00000  |
| 195 | H18 | PZ  | 0.00000  | 0.00000  | 0.00000  | 0.00000  | 0.00000  |
| 196 | C9  | S   | 0.00000  | 0.00005  | 0.00000  | 0.00001  | 0.00000  |
| 197 | C9  | S   | 0.00000  | 0.00002  | 0.00000  | 0.00005  | -0.00004 |
| 198 | C9  | PX  | 0.00001  | -0.00001 | 0.00000  | -0.00001 | 0.00000  |
| 199 | C9  | PY  | -0.00001 | -0.00001 | 0.00000  | -0.00003 | 0.00002  |
| 200 | C9  | PZ  | 0.00000  | 0.00000  | 0.00000  | 0.00000  | 0.00000  |
| 201 | C9  | S   | -0.00001 | -0.00025 | 0.00001  | -0.00014 | 0.00014  |
| 202 | C9  | PX  | -0.00001 | -0.00009 | 0.00002  | -0.00010 | -0.00002 |
| 203 | C9  | PY  | 0.00011  | 0.00020  | -0.00003 | 0.00021  | -0.00017 |
| 204 | C9  | PZ  | 0.00000  | 0.00000  | 0.00000  | 0.00000  | 0.00000  |
| 205 | C9  | DXX | 0.00000  | 0.00006  | 0.00000  | 0.00004  | 0.00000  |

|     |    |     |          |          |          |          |          |
|-----|----|-----|----------|----------|----------|----------|----------|
| 206 | C9 | DYY | 0.00000  | 0.00001  | 0.00000  | 0.00002  | -0.00001 |
| 207 | C9 | DZZ | 0.00000  | 0.00000  | 0.00000  | 0.00002  | -0.00002 |
| 208 | C9 | DXY | -0.00001 | 0.00002  | 0.00000  | 0.00001  | 0.00001  |
| 209 | C9 | DXZ | 0.00000  | 0.00000  | 0.00000  | 0.00000  | 0.00000  |
| 210 | C9 | DYZ | 0.00000  | 0.00000  | 0.00000  | 0.00000  | 0.00000  |
| 211 | H3 | S   | -0.00001 | 0.00000  | 0.00000  | -0.00001 | 0.00001  |
| 212 | H3 | S   | -0.00006 | -0.00009 | 0.00002  | -0.00011 | 0.00007  |
| 213 | H3 | PX  | 0.00000  | 0.00000  | 0.00000  | 0.00000  | 0.00000  |
| 214 | H3 | PY  | 0.00000  | 0.00000  | 0.00000  | 0.00001  | 0.00000  |
| 215 | H3 | PZ  | 0.00000  | 0.00000  | 0.00000  | 0.00000  | 0.00000  |
| 216 | H5 | S   | 0.00002  | 0.00002  | 0.00000  | 0.00002  | -0.00001 |
| 217 | H5 | S   | -0.00003 | 0.00011  | -0.00001 | 0.00010  | 0.00000  |
| 218 | H5 | PX  | 0.00000  | 0.00000  | 0.00000  | 0.00000  | 0.00000  |
| 219 | H5 | PY  | 0.00000  | 0.00000  | 0.00000  | -0.00001 | 0.00000  |
| 220 | H5 | PZ  | 0.00000  | 0.00001  | 0.00000  | 0.00001  | 0.00000  |
| 221 | H7 | S   | 0.00002  | 0.00002  | 0.00000  | 0.00002  | -0.00001 |
| 222 | H7 | S   | -0.00003 | 0.00011  | -0.00001 | 0.00010  | 0.00000  |
| 223 | H7 | PX  | 0.00000  | 0.00000  | 0.00000  | 0.00000  | 0.00000  |
| 224 | H7 | PY  | 0.00000  | 0.00000  | 0.00000  | -0.00001 | 0.00000  |
| 225 | H7 | PZ  | 0.00000  | -0.00001 | 0.00000  | -0.00001 | 0.00000  |

|              |            |            |           |           |           |
|--------------|------------|------------|-----------|-----------|-----------|
| MO:          | 11         | 12         | 13        | 14        | 15        |
| Eigenvalues: | -11.23182  | -11.22847  | -1.43013  | -1.27321  | -1.13071  |
| (ev):        | -305.63346 | -305.54247 | -38.91592 | -34.64594 | -30.76832 |

|    |    |     |          |          |          |          |          |
|----|----|-----|----------|----------|----------|----------|----------|
|    |    | A   | A        | A        | A        | A        |          |
| 1  | H1 | S   | 0.00004  | 0.00025  | -0.00620 | 0.00452  | 0.03571  |
| 2  | H1 | S   | 0.00044  | -0.00209 | 0.00026  | -0.00754 | 0.00369  |
| 3  | H1 | PX  | 0.00000  | -0.00024 | 0.00118  | -0.00045 | -0.00376 |
| 4  | H1 | PY  | -0.00001 | -0.00011 | 0.00036  | -0.00001 | -0.00122 |
| 5  | H1 | PZ  | 0.00000  | 0.00000  | 0.00000  | 0.00000  | 0.00000  |
| 6  | C1 | S   | 0.01493  | -0.99466 | 0.01629  | -0.01587 | -0.09051 |
| 7  | C1 | S   | 0.00030  | -0.02771 | -0.02953 | 0.03274  | 0.17011  |
| 8  | C1 | PX  | 0.00004  | 0.00027  | 0.01457  | -0.00998 | -0.06321 |
| 9  | C1 | PY  | 0.00002  | 0.00013  | -0.01860 | -0.01397 | -0.00228 |
| 10 | C1 | PZ  | 0.00000  | 0.00000  | 0.00000  | 0.00000  | 0.00000  |
| 11 | C1 | S   | 0.00308  | 0.00839  | -0.02690 | -0.00274 | 0.09795  |
| 12 | C1 | PX  | -0.00160 | 0.00032  | 0.00492  | 0.01936  | -0.00169 |
| 13 | C1 | PY  | -0.00057 | 0.00105  | -0.01783 | -0.00115 | 0.00566  |
| 14 | C1 | PZ  | 0.00000  | 0.00000  | 0.00000  | 0.00000  | 0.00000  |
| 15 | C1 | DXX | -0.00007 | 0.00150  | 0.00002  | 0.00012  | 0.00462  |
| 16 | C1 | DYY | -0.00021 | 0.00163  | -0.00312 | 0.00256  | 0.00524  |
| 17 | C1 | DZZ | -0.00010 | 0.00249  | 0.00146  | -0.00087 | -0.00738 |
| 18 | C1 | DXY | -0.00004 | 0.00009  | 0.00393  | 0.00058  | -0.00291 |
| 19 | C1 | DXZ | 0.00000  | 0.00000  | 0.00000  | 0.00000  | 0.00000  |
| 20 | C1 | DYZ | 0.00000  | 0.00000  | 0.00000  | 0.00000  | 0.00000  |
| 21 | C2 | S   | 0.00031  | -0.00033 | 0.00256  | -0.02948 | -0.08909 |
| 22 | C2 | S   | 0.00012  | -0.00029 | -0.00706 | 0.05458  | 0.17204  |
| 23 | C2 | PX  | -0.00001 | 0.00005  | -0.00277 | 0.02450  | 0.04652  |
| 24 | C2 | PY  | 0.00003  | -0.00002 | -0.00338 | -0.01624 | 0.05474  |
| 25 | C2 | PZ  | 0.00000  | 0.00000  | 0.00000  | 0.00000  | 0.00000  |
| 26 | C2 | S   | -0.00244 | 0.00483  | 0.00008  | 0.03863  | 0.08974  |
| 27 | C2 | PX  | -0.00140 | 0.00247  | 0.01110  | 0.00772  | -0.01030 |
| 28 | C2 | PY  | -0.00106 | -0.00004 | -0.00488 | -0.01343 | -0.00243 |

|    |    |     |          |          |          |          |          |
|----|----|-----|----------|----------|----------|----------|----------|
| 29 | C2 | PZ  | 0.00000  | 0.00000  | 0.00000  | 0.00000  | 0.00000  |
| 30 | C2 | DXX | -0.00004 | 0.00008  | -0.00007 | 0.00156  | 0.00155  |
| 31 | C2 | DYY | 0.00003  | 0.00005  | -0.00005 | 0.00376  | 0.00721  |
| 32 | C2 | DZZ | 0.00003  | -0.00007 | -0.00031 | -0.00322 | -0.00693 |
| 33 | C2 | DXY | -0.00003 | 0.00000  | -0.00047 | -0.00380 | 0.00224  |
| 34 | C2 | DXZ | 0.00000  | 0.00000  | 0.00000  | 0.00000  | 0.00000  |
| 35 | C2 | DYZ | 0.00000  | 0.00000  | 0.00000  | 0.00000  | 0.00000  |
| 36 | C3 | S   | 0.11120  | 0.04025  | 0.00262  | -0.06081 | -0.06079 |
| 37 | C3 | S   | 0.00351  | 0.00113  | -0.00583 | 0.11327  | 0.11797  |
| 38 | C3 | PX  | 0.00001  | 0.00004  | 0.00150  | -0.02790 | -0.01432 |
| 39 | C3 | PY  | -0.00020 | 0.00001  | -0.00420 | -0.04467 | 0.05041  |
| 40 | C3 | PZ  | 0.00000  | 0.00000  | 0.00000  | 0.00000  | 0.00000  |
| 41 | C3 | S   | -0.00954 | -0.00620 | -0.01975 | 0.05279  | 0.06226  |
| 42 | C3 | PX  | 0.00027  | -0.00058 | -0.01921 | -0.01945 | 0.00744  |
| 43 | C3 | PY  | 0.00106  | 0.00426  | 0.01976  | 0.00554  | 0.01982  |
| 44 | C3 | PZ  | 0.00000  | 0.00000  | 0.00000  | 0.00000  | 0.00000  |
| 45 | C3 | DXX | 0.00009  | 0.00021  | 0.00003  | 0.00621  | 0.00201  |
| 46 | C3 | DYY | 0.00034  | 0.00062  | -0.00099 | 0.00544  | 0.00821  |
| 47 | C3 | DZZ | -0.00013 | 0.00005  | 0.00004  | -0.00594 | -0.00520 |
| 48 | C3 | DXY | 0.00003  | 0.00010  | 0.00034  | 0.00283  | 0.00006  |
| 49 | C3 | DXZ | 0.00000  | 0.00000  | 0.00000  | 0.00000  | 0.00000  |
| 50 | C3 | DYZ | 0.00000  | 0.00000  | 0.00000  | 0.00000  | 0.00000  |
| 51 | C4 | S   | -0.00010 | 0.00979  | 0.07671  | -0.00875 | -0.09414 |
| 52 | C4 | S   | 0.00013  | 0.00030  | -0.14337 | 0.01608  | 0.18693  |
| 53 | C4 | PX  | -0.00002 | 0.00016  | -0.01128 | -0.00036 | -0.01194 |
| 54 | C4 | PY  | 0.00001  | -0.00012 | -0.10579 | -0.01437 | -0.08564 |
| 55 | C4 | PZ  | 0.00000  | 0.00000  | 0.00000  | 0.00000  | 0.00000  |
| 56 | C4 | S   | -0.00204 | -0.00203 | -0.00534 | 0.03740  | 0.10198  |
| 57 | C4 | PX  | -0.00040 | -0.00140 | 0.01211  | 0.00012  | 0.00151  |
| 58 | C4 | PY  | 0.00162  | -0.00055 | 0.03856  | -0.01100 | -0.03074 |
| 59 | C4 | PZ  | 0.00000  | 0.00000  | 0.00000  | 0.00000  | 0.00000  |
| 60 | C4 | DXX | 0.00003  | 0.00039  | 0.00849  | 0.00163  | 0.01181  |
| 61 | C4 | DYY | 0.00000  | 0.00039  | -0.02244 | 0.00001  | -0.00152 |
| 62 | C4 | DZZ | 0.00004  | 0.00000  | 0.01138  | -0.00082 | -0.00812 |
| 63 | C4 | DXY | 0.00002  | -0.00005 | -0.00331 | -0.00037 | -0.00328 |
| 64 | C4 | DXZ | 0.00000  | 0.00000  | 0.00000  | 0.00000  | 0.00000  |
| 65 | C4 | DYZ | 0.00000  | 0.00000  | 0.00000  | 0.00000  | 0.00000  |
| 66 | C5 | S   | 0.00004  | -0.00133 | 0.01436  | -0.01301 | -0.10698 |
| 67 | C5 | S   | -0.00005 | 0.00027  | -0.02680 | 0.02757  | 0.20249  |
| 68 | C5 | PX  | 0.00000  | 0.00008  | -0.01793 | 0.00457  | 0.03794  |
| 69 | C5 | PY  | -0.00001 | 0.00000  | -0.01060 | -0.01386 | -0.05080 |
| 70 | C5 | PZ  | 0.00000  | 0.00000  | 0.00000  | 0.00000  | 0.00000  |
| 71 | C5 | S   | 0.00202  | -0.00240 | -0.00784 | 0.00593  | 0.15158  |
| 72 | C5 | PX  | 0.00032  | -0.00137 | -0.00575 | -0.01547 | 0.01217  |
| 73 | C5 | PY  | -0.00118 | 0.00156  | -0.01311 | 0.00578  | -0.01329 |
| 74 | C5 | PZ  | 0.00000  | 0.00000  | 0.00000  | 0.00000  | 0.00000  |
| 75 | C5 | DXX | -0.00001 | -0.00012 | -0.00409 | -0.00003 | 0.00572  |
| 76 | C5 | DYY | 0.00000  | -0.00004 | -0.00071 | 0.00136  | 0.00726  |
| 77 | C5 | DZZ | -0.00001 | 0.00009  | 0.00146  | -0.00051 | -0.00943 |
| 78 | C5 | DXY | -0.00001 | 0.00001  | -0.00365 | 0.00022  | 0.00413  |
| 79 | C5 | DXZ | 0.00000  | 0.00000  | 0.00000  | 0.00000  | 0.00000  |
| 80 | C5 | DYZ | 0.00000  | 0.00000  | 0.00000  | 0.00000  | 0.00000  |
| 81 | C6 | S   | -0.00267 | -0.00050 | 0.00171  | -0.11298 | -0.02907 |
| 82 | C6 | S   | -0.00013 | 0.00015  | -0.00276 | 0.21798  | 0.05602  |

|     |    |     |          |          |          |          |          |
|-----|----|-----|----------|----------|----------|----------|----------|
| 83  | C6 | PX  | -0.00004 | -0.00001 | -0.00060 | 0.02423  | -0.00469 |
| 84  | C6 | PY  | 0.00001  | 0.00014  | -0.00137 | -0.10599 | 0.10320  |
| 85  | C6 | PZ  | 0.00000  | 0.00000  | 0.00000  | 0.00000  | 0.00000  |
| 86  | C6 | S   | 0.00150  | 0.00047  | -0.01626 | 0.04154  | 0.05675  |
| 87  | C6 | PX  | 0.00097  | 0.00268  | 0.00330  | 0.00929  | 0.00983  |
| 88  | C6 | PY  | 0.00274  | -0.00412 | -0.00979 | 0.02919  | 0.03149  |
| 89  | C6 | PZ  | 0.00000  | 0.00000  | 0.00000  | 0.00000  | 0.00000  |
| 90  | C6 | DXX | -0.00024 | -0.00004 | -0.00030 | -0.00093 | 0.00938  |
| 91  | C6 | DYY | -0.00012 | -0.00003 | -0.00066 | 0.01852  | -0.00252 |
| 92  | C6 | DZZ | -0.00007 | 0.00004  | 0.00020  | -0.01225 | -0.00267 |
| 93  | C6 | DXY | 0.00001  | 0.00000  | -0.00006 | -0.00149 | -0.00214 |
| 94  | C6 | DXZ | 0.00000  | 0.00000  | 0.00000  | 0.00000  | 0.00000  |
| 95  | C6 | DYZ | 0.00000  | 0.00000  | 0.00000  | 0.00000  | 0.00000  |
| 96  | C7 | S   | -0.98929 | -0.01065 | 0.00025  | -0.05284 | -0.00585 |
| 97  | C7 | S   | -0.02771 | -0.00053 | -0.00260 | 0.09704  | 0.00965  |
| 98  | C7 | PX  | 0.00026  | 0.00004  | 0.00025  | -0.05402 | 0.00238  |
| 99  | C7 | PY  | -0.00001 | 0.00008  | 0.00009  | 0.00090  | 0.03699  |
| 100 | C7 | PZ  | 0.00000  | 0.00000  | 0.00000  | 0.00000  | 0.00000  |
| 101 | C7 | S   | 0.01463  | 0.00635  | 0.03172  | 0.06360  | 0.02502  |
| 102 | C7 | PX  | -0.00326 | -0.00311 | -0.01214 | -0.01692 | -0.01040 |
| 103 | C7 | PY  | 0.00031  | 0.00055  | 0.00919  | 0.01369  | -0.00322 |
| 104 | C7 | PZ  | 0.00000  | 0.00000  | 0.00000  | 0.00000  | 0.00000  |
| 105 | C7 | DXX | 0.00121  | -0.00007 | 0.00014  | 0.00522  | -0.00156 |
| 106 | C7 | DYY | 0.00169  | -0.00002 | 0.00045  | 0.00391  | 0.00025  |
| 107 | C7 | DZZ | 0.00232  | -0.00004 | -0.00033 | -0.00547 | -0.00026 |
| 108 | C7 | DXY | 0.00024  | 0.00007  | -0.00012 | 0.00088  | -0.00416 |
| 109 | C7 | DXZ | 0.00000  | 0.00000  | 0.00000  | 0.00000  | 0.00000  |
| 110 | C7 | DYZ | 0.00000  | 0.00000  | 0.00000  | 0.00000  | 0.00000  |
| 111 | O1 | S   | 0.00001  | -0.00005 | 0.19869  | 0.00610  | 0.03367  |
| 112 | O1 | S   | 0.00007  | -0.00013 | -0.43672 | -0.01326 | -0.07932 |
| 113 | O1 | PX  | -0.00001 | -0.00001 | -0.05646 | -0.00299 | -0.04093 |
| 114 | O1 | PY  | -0.00001 | 0.00001  | 0.05701  | -0.00238 | -0.06206 |
| 115 | O1 | PZ  | 0.00000  | 0.00000  | 0.00000  | 0.00000  | 0.00000  |
| 116 | O1 | S   | -0.00060 | 0.00126  | -0.45294 | -0.01548 | -0.07702 |
| 117 | O1 | PX  | 0.00007  | 0.00023  | -0.03808 | -0.00205 | -0.02420 |
| 118 | O1 | PY  | 0.00012  | -0.00008 | 0.04337  | 0.00032  | -0.03702 |
| 119 | O1 | PZ  | 0.00000  | 0.00000  | 0.00000  | 0.00000  | 0.00000  |
| 120 | O1 | DXX | 0.00004  | -0.00012 | -0.00896 | -0.00038 | -0.00789 |
| 121 | O1 | DYY | 0.00005  | -0.00026 | -0.01538 | -0.00006 | 0.00450  |
| 122 | O1 | DZZ | 0.00003  | -0.00007 | 0.00485  | 0.00019  | -0.00161 |
| 123 | O1 | DXY | -0.00001 | 0.00005  | -0.00400 | -0.00025 | -0.00312 |
| 124 | O1 | DXZ | 0.00000  | 0.00000  | 0.00000  | 0.00000  | 0.00000  |
| 125 | O1 | DYZ | 0.00000  | 0.00000  | 0.00000  | 0.00000  | 0.00000  |
| 126 | H4 | S   | 0.00002  | -0.00009 | -0.00615 | 0.00287  | 0.04607  |
| 127 | H4 | S   | 0.00020  | -0.00069 | -0.00063 | -0.00699 | 0.00907  |
| 128 | H4 | PX  | 0.00000  | -0.00001 | -0.00097 | 0.00033  | 0.00345  |
| 129 | H4 | PY  | 0.00002  | -0.00003 | 0.00046  | -0.00018 | -0.00369 |
| 130 | H4 | PZ  | 0.00000  | 0.00000  | 0.00000  | 0.00000  | 0.00000  |
| 131 | N1 | S   | -0.00008 | 0.00006  | 0.00049  | -0.14549 | 0.05153  |
| 132 | N1 | S   | -0.00023 | 0.00021  | -0.00168 | 0.28830  | -0.10701 |
| 133 | N1 | PX  | 0.00001  | 0.00002  | -0.00032 | 0.08535  | -0.04046 |
| 134 | N1 | PY  | -0.00003 | -0.00006 | -0.00059 | 0.08472  | 0.00234  |
| 135 | N1 | PZ  | 0.00000  | 0.00000  | 0.00000  | 0.00000  | 0.00000  |
| 136 | N1 | S   | 0.00327  | -0.00292 | 0.00139  | 0.33063  | -0.10288 |



|     |     |     |          |          |          |          |          |
|-----|-----|-----|----------|----------|----------|----------|----------|
| 137 | N1  | PX  | 0.00044  | -0.00049 | 0.00147  | 0.05264  | -0.02143 |
| 138 | N1  | PY  | 0.00095  | -0.00055 | 0.00072  | 0.03942  | 0.00698  |
| 139 | N1  | PZ  | 0.00000  | 0.00000  | 0.00000  | 0.00000  | 0.00000  |
| 140 | N1  | DXX | -0.00022 | 0.00013  | -0.00005 | 0.00447  | -0.00525 |
| 141 | N1  | DYY | -0.00011 | 0.00008  | -0.00005 | 0.00748  | -0.00007 |
| 142 | N1  | DZZ | -0.00015 | 0.00010  | -0.00022 | -0.01361 | 0.00365  |
| 143 | N1  | DXY | -0.00001 | -0.00002 | -0.00001 | 0.00218  | 0.00139  |
| 144 | N1  | DXZ | 0.00000  | 0.00000  | 0.00000  | 0.00000  | 0.00000  |
| 145 | N1  | DYZ | 0.00000  | 0.00000  | 0.00000  | 0.00000  | 0.00000  |
| 146 | H6  | S   | -0.00005 | 0.00000  | -0.00002 | 0.01078  | 0.03504  |
| 147 | H6  | S   | -0.00043 | 0.00055  | 0.00450  | 0.00123  | -0.00140 |
| 148 | H6  | PX  | 0.00001  | -0.00003 | 0.00003  | 0.00127  | 0.00362  |
| 149 | H6  | PY  | 0.00002  | 0.00001  | 0.00018  | 0.00060  | 0.00163  |
| 150 | H6  | PZ  | 0.00000  | 0.00000  | 0.00000  | 0.00000  | 0.00000  |
| 151 | C8  | S   | 0.01523  | 0.00019  | 0.00037  | -0.08657 | 0.04650  |
| 152 | C8  | S   | 0.00033  | 0.00018  | -0.00010 | 0.16516  | -0.09069 |
| 153 | C8  | PX  | 0.00006  | -0.00007 | 0.00006  | -0.06111 | 0.03221  |
| 154 | C8  | PY  | 0.00006  | 0.00003  | -0.00020 | 0.05161  | 0.00531  |
| 155 | C8  | PZ  | 0.00000  | 0.00000  | 0.00000  | 0.00000  | 0.00000  |
| 156 | C8  | S   | -0.00503 | -0.00176 | -0.00653 | 0.04241  | -0.05469 |
| 157 | C8  | PX  | -0.00077 | -0.00095 | 0.00048  | 0.02983  | -0.01517 |
| 158 | C8  | PY  | -0.00239 | -0.00232 | -0.00929 | 0.00402  | -0.00435 |
| 159 | C8  | PZ  | 0.00000  | 0.00000  | 0.00000  | 0.00000  | 0.00000  |
| 160 | C8  | DXX | 0.00033  | 0.00003  | -0.00015 | 0.01251  | -0.00509 |
| 161 | C8  | DYY | 0.00057  | 0.00002  | -0.00020 | 0.00756  | -0.00204 |
| 162 | C8  | DZZ | 0.00011  | 0.00006  | 0.00013  | -0.00981 | 0.00444  |
| 163 | C8  | DXY | 0.00018  | -0.00004 | -0.00006 | -0.00913 | 0.00457  |
| 164 | C8  | DXZ | 0.00000  | 0.00000  | 0.00000  | 0.00000  | 0.00000  |
| 165 | C8  | DYZ | 0.00000  | 0.00000  | 0.00000  | 0.00000  | 0.00000  |
| 166 | H8  | S   | 0.00049  | 0.00007  | -0.00026 | 0.01424  | 0.00347  |
| 167 | H8  | S   | -0.00110 | 0.00077  | 0.00245  | 0.00462  | 0.00370  |
| 168 | H8  | PX  | -0.00036 | -0.00003 | 0.00009  | -0.00138 | -0.00046 |
| 169 | H8  | PY  | 0.00000  | 0.00001  | -0.00017 | -0.00018 | 0.00056  |
| 170 | H8  | PZ  | 0.00000  | 0.00000  | 0.00000  | 0.00000  | 0.00000  |
| 171 | C10 | S   | -0.00143 | -0.00002 | 0.00003  | -0.02468 | 0.02710  |
| 172 | C10 | S   | 0.00003  | 0.00000  | -0.00018 | 0.04663  | -0.05226 |
| 173 | C10 | PX  | 0.00006  | -0.00003 | -0.00009 | -0.01004 | 0.00901  |
| 174 | C10 | PY  | -0.00002 | -0.00004 | -0.00026 | 0.02935  | -0.02506 |
| 175 | C10 | PZ  | 0.00000  | 0.00000  | 0.00000  | 0.00000  | 0.00000  |
| 176 | C10 | S   | -0.00028 | -0.00098 | -0.00477 | 0.03307  | -0.03464 |
| 177 | C10 | PX  | -0.00002 | 0.00079  | 0.00194  | -0.01486 | 0.00625  |
| 178 | C10 | PY  | -0.00018 | -0.00022 | -0.00076 | 0.00286  | 0.00008  |
| 179 | C10 | PZ  | 0.00000  | 0.00000  | 0.00000  | 0.00000  | 0.00000  |
| 180 | C10 | DXX | -0.00006 | -0.00002 | -0.00007 | -0.00126 | 0.00081  |
| 181 | C10 | DYY | -0.00013 | -0.00001 | 0.00001  | 0.00197  | -0.00249 |
| 182 | C10 | DZZ | 0.00005  | -0.00001 | -0.00005 | -0.00183 | 0.00207  |
| 183 | C10 | DXY | 0.00006  | 0.00003  | -0.00001 | -0.00274 | 0.00181  |
| 184 | C10 | DXZ | 0.00000  | 0.00000  | 0.00000  | 0.00000  | 0.00000  |
| 185 | C10 | DYZ | 0.00000  | 0.00000  | 0.00000  | 0.00000  | 0.00000  |
| 186 | H16 | S   | 0.00006  | -0.00005 | -0.00016 | 0.00850  | -0.01175 |
| 187 | H16 | S   | 0.00001  | -0.00027 | -0.00027 | 0.00476  | -0.00310 |
| 188 | H16 | PX  | -0.00002 | 0.00000  | -0.00003 | -0.00078 | 0.00114  |
| 189 | H16 | PY  | 0.00002  | 0.00000  | -0.00002 | 0.00028  | -0.00063 |
| 190 | H16 | PZ  | 0.00000  | 0.00000  | 0.00000  | 0.00000  | 0.00000  |

|     |     |     |          |          |          |          |          |
|-----|-----|-----|----------|----------|----------|----------|----------|
| 191 | H18 | S   | -0.00002 | 0.00008  | 0.00017  | 0.00916  | -0.01342 |
| 192 | H18 | S   | -0.00014 | 0.00023  | 0.00102  | -0.00391 | 0.00033  |
| 193 | H18 | PX  | 0.00001  | 0.00000  | 0.00003  | 0.00107  | -0.00102 |
| 194 | H18 | PY  | -0.00001 | 0.00000  | 0.00003  | 0.00109  | -0.00138 |
| 195 | H18 | PZ  | 0.00000  | 0.00000  | 0.00000  | 0.00000  | 0.00000  |
| 196 | C9  | S   | 0.00000  | -0.00003 | 0.06057  | 0.00287  | 0.03593  |
| 197 | C9  | S   | -0.00001 | 0.00002  | -0.11069 | -0.00537 | -0.06957 |
| 198 | C9  | PX  | 0.00000  | 0.00003  | 0.07509  | 0.00328  | 0.03080  |
| 199 | C9  | PY  | 0.00001  | -0.00001 | 0.04254  | 0.00138  | 0.00749  |
| 200 | C9  | PZ  | 0.00000  | 0.00000  | 0.00000  | 0.00000  | 0.00000  |
| 201 | C9  | S   | 0.00004  | -0.00022 | -0.02784 | -0.00226 | -0.03599 |
| 202 | C9  | PX  | 0.00004  | 0.00017  | -0.00235 | 0.00007  | -0.00330 |
| 203 | C9  | PY  | -0.00004 | 0.00017  | -0.00033 | -0.00076 | 0.00027  |
| 204 | C9  | PZ  | 0.00000  | 0.00000  | 0.00000  | 0.00000  | 0.00000  |
| 205 | C9  | DXX | -0.00001 | -0.00001 | -0.01393 | -0.00062 | -0.00515 |
| 206 | C9  | DYY | 0.00000  | 0.00001  | 0.00142  | 0.00009  | 0.00097  |
| 207 | C9  | DZZ | 0.00000  | 0.00002  | 0.00915  | 0.00038  | 0.00296  |
| 208 | C9  | DXY | 0.00000  | -0.00002 | -0.01446 | -0.00049 | -0.00386 |
| 209 | C9  | DXZ | 0.00000  | 0.00000  | 0.00000  | 0.00000  | 0.00000  |
| 210 | C9  | DYZ | 0.00000  | 0.00000  | 0.00000  | 0.00000  | 0.00000  |
| 211 | H3  | S   | 0.00000  | 0.00000  | -0.02125 | -0.00125 | -0.02164 |
| 212 | H3  | S   | 0.00002  | -0.00005 | -0.00603 | 0.00011  | -0.00638 |
| 213 | H3  | PX  | 0.00000  | -0.00001 | 0.00019  | -0.00001 | -0.00031 |
| 214 | H3  | PY  | 0.00000  | 0.00000  | 0.00400  | 0.00017  | 0.00229  |
| 215 | H3  | PZ  | 0.00000  | 0.00000  | 0.00000  | 0.00000  | 0.00000  |
| 216 | H5  | S   | 0.00000  | 0.00004  | -0.02188 | -0.00118 | -0.01661 |
| 217 | H5  | S   | -0.00004 | -0.00001 | -0.00422 | 0.00004  | -0.00287 |
| 218 | H5  | PX  | 0.00000  | 0.00000  | 0.00241  | 0.00011  | 0.00152  |
| 219 | H5  | PY  | 0.00000  | -0.00002 | -0.00055 | -0.00003 | -0.00060 |
| 220 | H5  | PZ  | 0.00000  | 0.00000  | -0.00304 | -0.00013 | -0.00166 |
| 221 | H7  | S   | 0.00000  | 0.00004  | -0.02188 | -0.00118 | -0.01661 |
| 222 | H7  | S   | -0.00004 | -0.00001 | -0.00422 | 0.00004  | -0.00287 |
| 223 | H7  | PX  | 0.00000  | 0.00000  | 0.00241  | 0.00011  | 0.00152  |
| 224 | H7  | PY  | 0.00000  | -0.00002 | -0.00055 | -0.00003 | -0.00060 |
| 225 | H7  | PZ  | 0.00000  | 0.00000  | 0.00304  | 0.00013  | 0.00166  |

|              |           |           |           |           |           |
|--------------|-----------|-----------|-----------|-----------|-----------|
| MO:          | 16        | 17        | 18        | 19        | 20        |
| Eigenvalues: | -1.06874  | -1.03349  | -1.00471  | -0.96765  | -0.89142  |
| (ev):        | -29.08200 | -28.12281 | -27.33952 | -26.33104 | -24.25674 |

|    |    |    |          |          |          |          |          |
|----|----|----|----------|----------|----------|----------|----------|
|    |    | A  | A        | A        | A        | A        |          |
| 1  | H1 | S  | -0.04210 | 0.01786  | -0.04039 | -0.06499 | -0.00852 |
| 2  | H1 | S  | -0.01383 | 0.00887  | -0.00197 | -0.01493 | -0.00424 |
| 3  | H1 | PX | 0.00398  | -0.00135 | 0.00444  | 0.00585  | 0.00065  |
| 4  | H1 | PY | 0.00158  | -0.00071 | 0.00072  | 0.00116  | 0.00080  |
| 5  | H1 | PZ | 0.00000  | 0.00000  | 0.00000  | 0.00000  | 0.00000  |
| 6  | C1 | S  | 0.07406  | -0.02515 | 0.07305  | 0.09554  | 0.01529  |
| 7  | C1 | S  | -0.13894 | 0.04709  | -0.14070 | -0.18394 | -0.03015 |
| 8  | C1 | PX | 0.01375  | 0.01260  | 0.04749  | 0.03366  | -0.01256 |
| 9  | C1 | PY | 0.03033  | -0.04594 | -0.06411 | -0.03314 | 0.05262  |
| 10 | C1 | PZ | 0.00000  | 0.00000  | 0.00000  | 0.00000  | 0.00000  |
| 11 | C1 | S  | -0.10548 | 0.04857  | -0.07061 | -0.11440 | -0.02504 |
| 12 | C1 | PX | 0.00868  | -0.00658 | -0.01914 | -0.01788 | 0.00119  |
| 13 | C1 | PY | 0.00295  | -0.00908 | -0.01871 | -0.02534 | 0.01669  |

|    |    |     |          |          |          |          |          |
|----|----|-----|----------|----------|----------|----------|----------|
| 14 | C1 | PZ  | 0.00000  | 0.00000  | 0.00000  | 0.00000  | 0.00000  |
| 15 | C1 | DXX | -0.00087 | -0.00111 | -0.00387 | -0.00633 | 0.00248  |
| 16 | C1 | DYY | -0.00823 | 0.00563  | -0.00039 | -0.00062 | -0.00588 |
| 17 | C1 | DZZ | 0.00647  | -0.00258 | 0.00474  | 0.00678  | 0.00153  |
| 18 | C1 | DXY | 0.00069  | 0.00336  | 0.00638  | 0.00214  | -0.00466 |
| 19 | C1 | DXZ | 0.00000  | 0.00000  | 0.00000  | 0.00000  | 0.00000  |
| 20 | C1 | DYZ | 0.00000  | 0.00000  | 0.00000  | 0.00000  | 0.00000  |
| 21 | C2 | S   | -0.08246 | 0.02774  | -0.09790 | 0.00232  | 0.04365  |
| 22 | C2 | S   | 0.15676  | -0.05306 | 0.18836  | -0.00284 | -0.08880 |
| 23 | C2 | PX  | 0.02391  | 0.00966  | 0.02017  | -0.00768 | -0.04680 |
| 24 | C2 | PY  | 0.00839  | -0.06620 | 0.04172  | 0.01446  | 0.14008  |
| 25 | C2 | PZ  | 0.00000  | 0.00000  | 0.00000  | 0.00000  | 0.00000  |
| 26 | C2 | S   | 0.12242  | -0.03097 | 0.13035  | -0.02274 | -0.06017 |
| 27 | C2 | PX  | 0.00801  | 0.00359  | -0.00838 | -0.01270 | 0.00605  |
| 28 | C2 | PY  | 0.00275  | -0.01357 | 0.00664  | -0.00316 | 0.02929  |
| 29 | C2 | PZ  | 0.00000  | 0.00000  | 0.00000  | 0.00000  | 0.00000  |
| 30 | C2 | DXX | 0.00128  | 0.00307  | 0.00186  | -0.00083 | -0.00993 |
| 31 | C2 | DYY | 0.00842  | -0.00340 | 0.00601  | -0.00019 | 0.00270  |
| 32 | C2 | DZZ | -0.00691 | 0.00165  | -0.00767 | 0.00079  | 0.00380  |
| 33 | C2 | DXY | -0.00190 | -0.00558 | 0.00075  | 0.00087  | 0.01084  |
| 34 | C2 | DXZ | 0.00000  | 0.00000  | 0.00000  | 0.00000  | 0.00000  |
| 35 | C2 | DYZ | 0.00000  | 0.00000  | 0.00000  | 0.00000  | 0.00000  |
| 36 | C3 | S   | 0.10009  | -0.07534 | -0.03584 | -0.02340 | 0.03607  |
| 37 | C3 | S   | -0.19116 | 0.14579  | 0.06960  | 0.04539  | -0.07381 |
| 38 | C3 | PX  | -0.06446 | -0.01048 | 0.00687  | 0.02385  | 0.07246  |
| 39 | C3 | PY  | 0.02480  | -0.01744 | -0.08078 | -0.13091 | -0.05911 |
| 40 | C3 | PZ  | 0.00000  | 0.00000  | 0.00000  | 0.00000  | 0.00000  |
| 41 | C3 | S   | -0.13955 | 0.08624  | 0.04585  | 0.03588  | -0.04157 |
| 42 | C3 | PX  | -0.00474 | -0.00050 | 0.01066  | 0.01765  | 0.01209  |
| 43 | C3 | PY  | -0.00201 | 0.00225  | -0.03767 | -0.07364 | -0.01970 |
| 44 | C3 | PZ  | 0.00000  | 0.00000  | 0.00000  | 0.00000  | 0.00000  |
| 45 | C3 | DXX | 0.00319  | 0.00490  | 0.00389  | 0.00233  | -0.00786 |
| 46 | C3 | DYY | -0.01407 | 0.00479  | -0.00257 | -0.00365 | 0.00230  |
| 47 | C3 | DZZ | 0.00777  | -0.00603 | -0.00234 | -0.00109 | 0.00267  |
| 48 | C3 | DXY | 0.00606  | 0.00143  | -0.00489 | -0.00611 | -0.00516 |
| 49 | C3 | DXZ | 0.00000  | 0.00000  | 0.00000  | 0.00000  | 0.00000  |
| 50 | C3 | DYZ | 0.00000  | 0.00000  | 0.00000  | 0.00000  | 0.00000  |
| 51 | C4 | S   | 0.01915  | 0.04241  | 0.09287  | 0.01058  | -0.04032 |
| 52 | C4 | S   | -0.03924 | -0.08424 | -0.18426 | -0.02082 | 0.08445  |
| 53 | C4 | PX  | -0.06425 | 0.05901  | -0.06431 | -0.11439 | -0.08331 |
| 54 | C4 | PY  | 0.02846  | -0.01373 | -0.00175 | 0.14497  | -0.05958 |
| 55 | C4 | PZ  | 0.00000  | 0.00000  | 0.00000  | 0.00000  | 0.00000  |
| 56 | C4 | S   | -0.01231 | -0.05705 | -0.14550 | -0.04625 | 0.07676  |
| 57 | C4 | PX  | -0.00858 | 0.00443  | -0.01657 | -0.00839 | -0.02950 |
| 58 | C4 | PY  | -0.00505 | 0.02019  | 0.03417  | 0.02762  | -0.02442 |
| 59 | C4 | PZ  | 0.00000  | 0.00000  | 0.00000  | 0.00000  | 0.00000  |
| 60 | C4 | DXX | 0.00149  | -0.00505 | -0.00060 | -0.00740 | 0.01418  |
| 61 | C4 | DYY | -0.00035 | -0.00171 | -0.00758 | 0.01285  | -0.01064 |
| 62 | C4 | DZZ | 0.00092  | 0.00469  | 0.00873  | -0.00205 | -0.00220 |
| 63 | C4 | DXY | 0.00628  | -0.00210 | 0.00988  | 0.00503  | 0.00403  |
| 64 | C4 | DXZ | 0.00000  | 0.00000  | 0.00000  | 0.00000  | 0.00000  |
| 65 | C4 | DYZ | 0.00000  | 0.00000  | 0.00000  | 0.00000  | 0.00000  |
| 66 | C5 | S   | -0.05449 | 0.07105  | -0.04742 | -0.02129 | -0.09399 |
| 67 | C5 | S   | 0.10618  | -0.13717 | 0.08843  | 0.04100  | 0.18596  |

|     |    |     |          |          |          |          |          |
|-----|----|-----|----------|----------|----------|----------|----------|
| 68  | C5 | PX  | -0.02075 | -0.01317 | -0.07005 | -0.00444 | 0.01754  |
| 69  | C5 | PY  | -0.04882 | 0.00589  | -0.09736 | 0.02996  | 0.05515  |
| 70  | C5 | PZ  | 0.00000  | 0.00000  | 0.00000  | 0.00000  | 0.00000  |
| 71  | C5 | S   | 0.06178  | -0.10294 | 0.07806  | 0.06084  | 0.14998  |
| 72  | C5 | PX  | -0.00868 | -0.00217 | -0.00144 | 0.00623  | -0.01152 |
| 73  | C5 | PY  | 0.00568  | -0.00409 | -0.01902 | -0.00023 | 0.02319  |
| 74  | C5 | PZ  | 0.00000  | 0.00000  | 0.00000  | 0.00000  | 0.00000  |
| 75  | C5 | DXX | -0.00295 | -0.00383 | -0.00947 | 0.00045  | 0.00858  |
| 76  | C5 | DYY | 0.00677  | -0.00387 | 0.01009  | 0.00201  | -0.00020 |
| 77  | C5 | DZZ | -0.00374 | 0.00580  | -0.00339 | -0.00188 | -0.00720 |
| 78  | C5 | DXY | 0.00138  | -0.00328 | -0.00065 | 0.00205  | 0.00149  |
| 79  | C5 | DXZ | 0.00000  | 0.00000  | 0.00000  | 0.00000  | 0.00000  |
| 80  | C5 | DYZ | 0.00000  | 0.00000  | 0.00000  | 0.00000  | 0.00000  |
| 81  | C6 | S   | -0.05846 | -0.05665 | -0.01611 | 0.00017  | 0.08238  |
| 82  | C6 | S   | 0.11672  | 0.11208  | 0.03037  | -0.00213 | -0.16801 |
| 83  | C6 | PX  | -0.10105 | 0.04247  | -0.00888 | 0.03609  | 0.04351  |
| 84  | C6 | PY  | -0.05468 | -0.02278 | 0.12031  | 0.00382  | -0.10466 |
| 85  | C6 | PZ  | 0.00000  | 0.00000  | 0.00000  | 0.00000  | 0.00000  |
| 86  | C6 | S   | 0.05427  | 0.07607  | 0.04038  | 0.00952  | -0.15586 |
| 87  | C6 | PX  | -0.00989 | 0.02773  | -0.00307 | 0.00614  | 0.00376  |
| 88  | C6 | PY  | 0.01425  | 0.00081  | 0.03840  | 0.01213  | -0.04409 |
| 89  | C6 | PZ  | 0.00000  | 0.00000  | 0.00000  | 0.00000  | 0.00000  |
| 90  | C6 | DXX | -0.00950 | 0.00538  | 0.01190  | 0.00519  | -0.00949 |
| 91  | C6 | DYY | 0.01352  | 0.00131  | -0.00637 | -0.00347 | 0.00187  |
| 92  | C6 | DZZ | -0.00549 | -0.00541 | -0.00112 | -0.00019 | 0.00574  |
| 93  | C6 | DXY | -0.00533 | 0.00539  | -0.00673 | -0.00106 | -0.00014 |
| 94  | C6 | DXZ | 0.00000  | 0.00000  | 0.00000  | 0.00000  | 0.00000  |
| 95  | C6 | DYZ | 0.00000  | 0.00000  | 0.00000  | 0.00000  | 0.00000  |
| 96  | C7 | S   | 0.10899  | -0.01574 | -0.06771 | -0.07718 | -0.04742 |
| 97  | C7 | S   | -0.20858 | 0.02800  | 0.12946  | 0.15018  | 0.09490  |
| 98  | C7 | PX  | 0.04975  | -0.01677 | -0.02469 | -0.03633 | -0.01753 |
| 99  | C7 | PY  | -0.03090 | 0.08636  | 0.01157  | 0.02668  | -0.02715 |
| 100 | C7 | PZ  | 0.00000  | 0.00000  | 0.00000  | 0.00000  | 0.00000  |
| 101 | C7 | S   | -0.14186 | 0.04091  | 0.07915  | 0.07371  | 0.06056  |
| 102 | C7 | PX  | -0.00078 | -0.00750 | 0.00987  | 0.02125  | 0.00901  |
| 103 | C7 | PY  | -0.00169 | 0.01019  | -0.00508 | -0.00640 | -0.00450 |
| 104 | C7 | PZ  | 0.00000  | 0.00000  | 0.00000  | 0.00000  | 0.00000  |
| 105 | C7 | DXX | -0.00351 | 0.00044  | 0.00293  | 0.00501  | 0.00471  |
| 106 | C7 | DYY | -0.00810 | -0.00168 | 0.00368  | 0.00166  | 0.00027  |
| 107 | C7 | DZZ | 0.00854  | -0.00113 | -0.00535 | -0.00583 | -0.00360 |
| 108 | C7 | DXY | 0.00232  | -0.00946 | -0.00242 | -0.00366 | 0.00391  |
| 109 | C7 | DXZ | 0.00000  | 0.00000  | 0.00000  | 0.00000  | 0.00000  |
| 110 | C7 | DYZ | 0.00000  | 0.00000  | 0.00000  | 0.00000  | 0.00000  |
| 111 | O1 | S   | -0.00797 | -0.00234 | -0.00686 | -0.04673 | 0.04112  |
| 112 | O1 | S   | 0.01796  | 0.00772  | 0.01881  | 0.10638  | -0.09460 |
| 113 | O1 | PX  | -0.00868 | 0.05693  | 0.07601  | -0.13342 | 0.02023  |
| 114 | O1 | PY  | 0.01052  | 0.06591  | 0.14423  | -0.09973 | 0.00248  |
| 115 | O1 | PZ  | 0.00000  | 0.00000  | 0.00000  | 0.00000  | 0.00000  |
| 116 | O1 | S   | 0.02469  | -0.00402 | 0.00769  | 0.14318  | -0.13116 |
| 117 | O1 | PX  | -0.00243 | 0.03086  | 0.04507  | -0.07107 | 0.01175  |
| 118 | O1 | PY  | 0.00579  | 0.03772  | 0.07919  | -0.05112 | -0.00212 |
| 119 | O1 | PZ  | 0.00000  | 0.00000  | 0.00000  | 0.00000  | 0.00000  |
| 120 | O1 | DXX | 0.00035  | 0.00729  | 0.01271  | -0.01248 | 0.00306  |
| 121 | O1 | DYY | -0.00086 | -0.00486 | -0.01019 | 0.00779  | 0.00021  |

|     |     |     |          |          |          |          |          |
|-----|-----|-----|----------|----------|----------|----------|----------|
| 122 | O1  | DZZ | 0.00042  | 0.00066  | 0.00150  | 0.00184  | -0.00141 |
| 123 | O1  | DXY | 0.00173  | 0.00153  | 0.00728  | -0.00076 | 0.00214  |
| 124 | O1  | DXZ | 0.00000  | 0.00000  | 0.00000  | 0.00000  | 0.00000  |
| 125 | O1  | DYZ | 0.00000  | 0.00000  | 0.00000  | 0.00000  | 0.00000  |
| 126 | H4  | S   | 0.02906  | -0.04457 | 0.02521  | 0.02729  | 0.08672  |
| 127 | H4  | S   | 0.00241  | -0.00994 | 0.01067  | 0.01194  | 0.02585  |
| 128 | H4  | PX  | 0.00183  | -0.00322 | 0.00083  | 0.00224  | 0.00532  |
| 129 | H4  | PY  | -0.00252 | 0.00303  | -0.00309 | -0.00097 | -0.00524 |
| 130 | H4  | PZ  | 0.00000  | 0.00000  | 0.00000  | 0.00000  | 0.00000  |
| 131 | N1  | S   | -0.06702 | -0.00328 | 0.06555  | 0.02414  | -0.03575 |
| 132 | N1  | S   | 0.13832  | 0.00596  | -0.13818 | -0.05106 | 0.07607  |
| 133 | N1  | PX  | -0.02349 | -0.03238 | -0.01885 | 0.00495  | 0.07469  |
| 134 | N1  | PY  | 0.07420  | 0.08935  | -0.02218 | 0.01545  | -0.05274 |
| 135 | N1  | PZ  | 0.00000  | 0.00000  | 0.00000  | 0.00000  | 0.00000  |
| 136 | N1  | S   | 0.16746  | 0.00156  | -0.14612 | -0.06134 | 0.08604  |
| 137 | N1  | PX  | 0.00039  | -0.01893 | -0.01302 | -0.00285 | 0.03419  |
| 138 | N1  | PY  | 0.03087  | 0.03535  | -0.00426 | 0.00495  | -0.02637 |
| 139 | N1  | PZ  | 0.00000  | 0.00000  | 0.00000  | 0.00000  | 0.00000  |
| 140 | N1  | DXX | -0.00761 | -0.00893 | -0.00016 | 0.00055  | 0.01050  |
| 141 | N1  | DYY | 0.00750  | 0.00658  | -0.00235 | -0.00059 | -0.00728 |
| 142 | N1  | DZZ | -0.00315 | -0.00020 | 0.00329  | 0.00064  | -0.00290 |
| 143 | N1  | DXY | 0.00098  | 0.00835  | -0.00050 | 0.00364  | -0.00058 |
| 144 | N1  | DXZ | 0.00000  | 0.00000  | 0.00000  | 0.00000  | 0.00000  |
| 145 | N1  | DYZ | 0.00000  | 0.00000  | 0.00000  | 0.00000  | 0.00000  |
| 146 | H6  | S   | 0.04633  | -0.01489 | 0.05690  | -0.00062 | -0.03520 |
| 147 | H6  | S   | 0.01240  | -0.00417 | 0.01188  | -0.00387 | -0.00777 |
| 148 | H6  | PX  | 0.00469  | -0.00134 | 0.00534  | -0.00021 | -0.00326 |
| 149 | H6  | PY  | 0.00139  | -0.00115 | 0.00226  | 0.00024  | 0.00074  |
| 150 | H6  | PZ  | 0.00000  | 0.00000  | 0.00000  | 0.00000  | 0.00000  |
| 151 | C8  | S   | 0.05973  | 0.10478  | -0.01926 | 0.01109  | -0.02550 |
| 152 | C8  | S   | -0.11672 | -0.20539 | 0.03641  | -0.02222 | 0.05363  |
| 153 | C8  | PX  | -0.07948 | -0.01887 | 0.08573  | 0.04075  | -0.04871 |
| 154 | C8  | PY  | 0.00525  | 0.12952  | -0.01034 | 0.09575  | 0.13389  |
| 155 | C8  | PZ  | 0.00000  | 0.00000  | 0.00000  | 0.00000  | 0.00000  |
| 156 | C8  | S   | -0.08468 | -0.13950 | 0.03957  | -0.00105 | 0.03907  |
| 157 | C8  | PX  | -0.00881 | -0.01790 | 0.00793  | 0.00678  | 0.00446  |
| 158 | C8  | PY  | -0.01597 | 0.00308  | 0.01253  | 0.03017  | 0.03801  |
| 159 | C8  | PZ  | 0.00000  | 0.00000  | 0.00000  | 0.00000  | 0.00000  |
| 160 | C8  | DXX | 0.00492  | 0.00294  | -0.00696 | 0.00099  | 0.01245  |
| 161 | C8  | DYY | -0.01086 | -0.00793 | 0.00722  | 0.00223  | -0.00402 |
| 162 | C8  | DZZ | 0.00463  | 0.00764  | -0.00094 | 0.00035  | -0.00341 |
| 163 | C8  | DXY | -0.00916 | 0.00292  | 0.00844  | 0.00765  | 0.00234  |
| 164 | C8  | DXZ | 0.00000  | 0.00000  | 0.00000  | 0.00000  | 0.00000  |
| 165 | C8  | DYZ | 0.00000  | 0.00000  | 0.00000  | 0.00000  | 0.00000  |
| 166 | H8  | S   | -0.05559 | 0.00114  | 0.03915  | 0.04244  | 0.03237  |
| 167 | H8  | S   | -0.01066 | -0.00105 | 0.00736  | 0.00452  | 0.00864  |
| 168 | H8  | PX  | 0.00555  | -0.00013 | -0.00361 | -0.00376 | -0.00267 |
| 169 | H8  | PY  | -0.00071 | 0.00103  | 0.00042  | 0.00073  | -0.00004 |
| 170 | H8  | PZ  | 0.00000  | 0.00000  | 0.00000  | 0.00000  | 0.00000  |
| 171 | C10 | S   | 0.04977  | 0.13180  | -0.02938 | 0.05405  | 0.08586  |
| 172 | C10 | S   | -0.09534 | -0.25340 | 0.05621  | -0.10445 | -0.16694 |
| 173 | C10 | PX  | -0.00260 | 0.01903  | 0.01004  | 0.01497  | -0.00764 |
| 174 | C10 | PY  | -0.04046 | -0.08618 | 0.01815  | -0.01754 | 0.01281  |
| 175 | C10 | PZ  | 0.00000  | 0.00000  | 0.00000  | 0.00000  | 0.00000  |

|     |     |     |          |          |          |          |          |
|-----|-----|-----|----------|----------|----------|----------|----------|
| 176 | C10 | S   | -0.07753 | -0.19722 | 0.05074  | -0.07824 | -0.14095 |
| 177 | C10 | PX  | 0.00018  | 0.00367  | 0.00118  | -0.00318 | -0.01098 |
| 178 | C10 | PY  | -0.00530 | -0.00781 | 0.00394  | 0.00082  | 0.00971  |
| 179 | C10 | PZ  | 0.00000  | 0.00000  | 0.00000  | 0.00000  | 0.00000  |
| 180 | C10 | DXX | 0.00191  | 0.00226  | -0.00078 | -0.00046 | -0.00317 |
| 181 | C10 | DYY | -0.00490 | -0.01141 | 0.00261  | -0.00354 | -0.00292 |
| 182 | C10 | DZZ | 0.00404  | 0.01095  | -0.00248 | 0.00465  | 0.00737  |
| 183 | C10 | DXY | -0.00035 | 0.00357  | 0.00105  | 0.00202  | -0.00036 |
| 184 | C10 | DXZ | 0.00000  | 0.00000  | 0.00000  | 0.00000  | 0.00000  |
| 185 | C10 | DYZ | 0.00000  | 0.00000  | 0.00000  | 0.00000  | 0.00000  |
| 186 | H16 | S   | -0.02971 | -0.07442 | 0.02251  | -0.03185 | -0.07407 |
| 187 | H16 | S   | -0.00679 | -0.01773 | 0.00739  | -0.00737 | -0.02687 |
| 188 | H16 | PX  | 0.00307  | 0.00723  | -0.00218 | 0.00296  | 0.00624  |
| 189 | H16 | PY  | -0.00157 | -0.00354 | 0.00108  | -0.00121 | -0.00228 |
| 190 | H16 | PZ  | 0.00000  | 0.00000  | 0.00000  | 0.00000  | 0.00000  |
| 191 | H18 | S   | -0.02219 | -0.07399 | 0.01282  | -0.03976 | -0.06985 |
| 192 | H18 | S   | -0.00166 | -0.01477 | 0.00181  | -0.01426 | -0.02854 |
| 193 | H18 | PX  | -0.00159 | -0.00532 | 0.00099  | -0.00275 | -0.00488 |
| 194 | H18 | PY  | -0.00165 | -0.00608 | 0.00077  | -0.00303 | -0.00409 |
| 195 | H18 | PZ  | 0.00000  | 0.00000  | 0.00000  | 0.00000  | 0.00000  |
| 196 | C9  | S   | -0.00118 | -0.04517 | -0.08845 | 0.12012  | -0.06968 |
| 197 | C9  | S   | 0.00234  | 0.08810  | 0.17312  | -0.23432 | 0.13590  |
| 198 | C9  | PX  | -0.00501 | -0.01422 | -0.02448 | -0.02404 | 0.06104  |
| 199 | C9  | PY  | 0.00266  | -0.00259 | 0.01003  | -0.00903 | 0.02942  |
| 200 | C9  | PZ  | 0.00000  | 0.00000  | 0.00000  | 0.00000  | 0.00000  |
| 201 | C9  | S   | -0.00068 | 0.06283  | 0.12898  | -0.20316 | 0.14302  |
| 202 | C9  | PX  | -0.00068 | 0.00555  | 0.00903  | -0.02062 | 0.01919  |
| 203 | C9  | PY  | 0.00106  | -0.00085 | 0.00358  | 0.00222  | 0.00355  |
| 204 | C9  | PZ  | 0.00000  | 0.00000  | 0.00000  | 0.00000  | 0.00000  |
| 205 | C9  | DXX | 0.00058  | 0.00285  | 0.00472  | 0.00109  | -0.00698 |
| 206 | C9  | DYY | -0.00023 | -0.00083 | -0.00202 | 0.00059  | 0.00053  |
| 207 | C9  | DZZ | -0.00043 | -0.00170 | -0.00309 | 0.00005  | 0.00316  |
| 208 | C9  | DXY | 0.00027  | 0.00162  | 0.00153  | 0.00197  | -0.00610 |
| 209 | C9  | DXZ | 0.00000  | 0.00000  | 0.00000  | 0.00000  | 0.00000  |
| 210 | C9  | DYZ | 0.00000  | 0.00000  | 0.00000  | 0.00000  | 0.00000  |
| 211 | H3  | S   | 0.00205  | 0.03072  | 0.06738  | -0.08951 | 0.06349  |
| 212 | H3  | S   | 0.00067  | 0.00995  | 0.02200  | -0.03100 | 0.02471  |
| 213 | H3  | PX  | 0.00000  | 0.00060  | 0.00130  | -0.00211 | 0.00171  |
| 214 | H3  | PY  | -0.00015 | -0.00297 | -0.00616 | 0.00806  | -0.00511 |
| 215 | H3  | PZ  | 0.00000  | 0.00000  | 0.00000  | 0.00000  | 0.00000  |
| 216 | H5  | S   | -0.00108 | 0.02810  | 0.05452  | -0.09218 | 0.06522  |
| 217 | H5  | S   | 0.00009  | 0.00627  | 0.01354  | -0.02619 | 0.02274  |
| 218 | H5  | PX  | -0.00012 | -0.00171 | -0.00338 | 0.00418  | -0.00220 |
| 219 | H5  | PY  | 0.00009  | 0.00076  | 0.00173  | -0.00222 | 0.00178  |
| 220 | H5  | PZ  | 0.00004  | 0.00228  | 0.00454  | -0.00688 | 0.00460  |
| 221 | H7  | S   | -0.00108 | 0.02810  | 0.05452  | -0.09218 | 0.06522  |
| 222 | H7  | S   | 0.00009  | 0.00627  | 0.01354  | -0.02619 | 0.02274  |
| 223 | H7  | PX  | -0.00012 | -0.00171 | -0.00338 | 0.00418  | -0.00220 |
| 224 | H7  | PY  | 0.00009  | 0.00076  | 0.00173  | -0.00222 | 0.00178  |
| 225 | H7  | PZ  | -0.00004 | -0.00228 | -0.00454 | 0.00688  | -0.00460 |

|              |           |           |           |           |           |
|--------------|-----------|-----------|-----------|-----------|-----------|
| MO:          | 21        | 22        | 23        | 24        | 25        |
| Eigenvalues: | -0.80914  | -0.78893  | -0.75398  | -0.71283  | -0.69053  |
| (ev):        | -22.01776 | -21.46801 | -20.51684 | -19.39700 | -18.79033 |

|    |    | A   | A        | A        | A        | A        |          |
|----|----|-----|----------|----------|----------|----------|----------|
| 1  | H1 | S   | 0.08957  | -0.05558 | 0.07055  | -0.04284 | -0.00203 |
| 2  | H1 | S   | 0.04411  | -0.02156 | 0.04148  | -0.02747 | -0.00689 |
| 3  | H1 | PX  | -0.00692 | 0.00301  | -0.00388 | 0.00241  | -0.00103 |
| 4  | H1 | PY  | -0.00120 | 0.00339  | -0.00259 | 0.00033  | 0.00274  |
| 5  | H1 | PZ  | 0.00000  | 0.00000  | 0.00000  | 0.00000  | 0.00000  |
| 6  | C1 | S   | -0.05475 | 0.04801  | -0.01669 | -0.01564 | -0.00206 |
| 7  | C1 | S   | 0.10543  | -0.09677 | 0.03415  | 0.02966  | 0.00110  |
| 8  | C1 | PX  | 0.05386  | -0.07982 | 0.11873  | -0.09988 | -0.06175 |
| 9  | C1 | PY  | 0.10514  | 0.15356  | -0.04132 | -0.01112 | 0.17702  |
| 10 | C1 | PZ  | 0.00000  | 0.00000  | 0.00000  | 0.00000  | 0.00000  |
| 11 | C1 | S   | 0.11926  | -0.06094 | 0.03315  | 0.03347  | 0.01070  |
| 12 | C1 | PX  | 0.01633  | -0.04176 | 0.04066  | -0.03564 | -0.01654 |
| 13 | C1 | PY  | 0.03258  | 0.03364  | -0.00567 | -0.01127 | 0.06613  |
| 14 | C1 | PZ  | 0.00000  | 0.00000  | 0.00000  | 0.00000  | 0.00000  |
| 15 | C1 | DXX | 0.00437  | 0.00142  | -0.00080 | 0.00462  | 0.00494  |
| 16 | C1 | DYY | -0.00178 | -0.00825 | 0.00314  | -0.00438 | -0.00786 |
| 17 | C1 | DZZ | -0.00363 | 0.00350  | -0.00093 | -0.00080 | -0.00035 |
| 18 | C1 | DXY | -0.00543 | -0.01001 | 0.00294  | -0.00336 | -0.00905 |
| 19 | C1 | DXZ | 0.00000  | 0.00000  | 0.00000  | 0.00000  | 0.00000  |
| 20 | C1 | DYZ | 0.00000  | 0.00000  | 0.00000  | 0.00000  | 0.00000  |
| 21 | C2 | S   | -0.08677 | 0.00552  | 0.01176  | 0.03219  | 0.01285  |
| 22 | C2 | S   | 0.17335  | -0.00641 | -0.02397 | -0.06559 | -0.02867 |
| 23 | C2 | PX  | -0.08573 | 0.06374  | -0.08517 | 0.10132  | -0.03896 |
| 24 | C2 | PY  | -0.02692 | -0.14145 | -0.00890 | -0.02329 | 0.15879  |
| 25 | C2 | PZ  | 0.00000  | 0.00000  | 0.00000  | 0.00000  | 0.00000  |
| 26 | C2 | S   | 0.14700  | -0.03489 | 0.00329  | -0.06238 | -0.01868 |
| 27 | C2 | PX  | -0.04706 | 0.00282  | -0.01539 | 0.05109  | -0.00232 |
| 28 | C2 | PY  | -0.00619 | -0.03559 | 0.00434  | 0.00754  | 0.04006  |
| 29 | C2 | PZ  | 0.00000  | 0.00000  | 0.00000  | 0.00000  | 0.00000  |
| 30 | C2 | DXX | 0.00310  | 0.00641  | -0.00306 | -0.00264 | -0.00819 |
| 31 | C2 | DYY | 0.00183  | -0.00347 | 0.00365  | 0.00262  | 0.00465  |
| 32 | C2 | DZZ | -0.00583 | 0.00041  | 0.00104  | 0.00152  | 0.00086  |
| 33 | C2 | DXY | 0.00195  | -0.00792 | 0.00017  | -0.00297 | 0.00615  |
| 34 | C2 | DXZ | 0.00000  | 0.00000  | 0.00000  | 0.00000  | 0.00000  |
| 35 | C2 | DYZ | 0.00000  | 0.00000  | 0.00000  | 0.00000  | 0.00000  |
| 36 | C3 | S   | 0.06495  | 0.05277  | -0.00785 | 0.04330  | 0.01990  |
| 37 | C3 | S   | -0.13054 | -0.10537 | 0.01616  | -0.08859 | -0.04169 |
| 38 | C3 | PX  | 0.11679  | -0.06392 | 0.17277  | 0.01088  | -0.06959 |
| 39 | C3 | PY  | 0.01272  | -0.12025 | -0.00358 | 0.09313  | -0.14481 |
| 40 | C3 | PZ  | 0.00000  | 0.00000  | 0.00000  | 0.00000  | 0.00000  |
| 41 | C3 | S   | -0.10078 | -0.09288 | 0.03403  | -0.07563 | -0.05787 |
| 42 | C3 | PX  | 0.03608  | -0.00105 | 0.06218  | -0.00631 | -0.02028 |
| 43 | C3 | PY  | -0.01317 | -0.07611 | -0.00745 | 0.02362  | -0.03704 |
| 44 | C3 | PZ  | 0.00000  | 0.00000  | 0.00000  | 0.00000  | 0.00000  |
| 45 | C3 | DXX | -0.00900 | 0.00559  | -0.00449 | -0.00187 | 0.00071  |
| 46 | C3 | DYY | 0.00316  | -0.00850 | 0.00196  | 0.00138  | -0.00022 |
| 47 | C3 | DZZ | 0.00481  | 0.00352  | 0.00067  | 0.00243  | 0.00047  |
| 48 | C3 | DXY | -0.00529 | -0.00419 | -0.00412 | -0.00196 | 0.00095  |
| 49 | C3 | DXZ | 0.00000  | 0.00000  | 0.00000  | 0.00000  | 0.00000  |
| 50 | C3 | DYZ | 0.00000  | 0.00000  | 0.00000  | 0.00000  | 0.00000  |
| 51 | C4 | S   | 0.00925  | -0.08006 | 0.01292  | -0.00553 | -0.00382 |
| 52 | C4 | S   | -0.01960 | 0.17103  | -0.02669 | 0.01005  | 0.00766  |

|     |    |     |          |          |          |          |          |
|-----|----|-----|----------|----------|----------|----------|----------|
| 53  | C4 | PX  | 0.18642  | 0.01816  | -0.05263 | -0.06064 | 0.16597  |
| 54  | C4 | PY  | 0.01598  | 0.03798  | 0.07079  | -0.22342 | -0.09874 |
| 55  | C4 | PZ  | 0.00000  | 0.00000  | 0.00000  | 0.00000  | 0.00000  |
| 56  | C4 | S   | -0.03915 | 0.10340  | -0.01725 | 0.04564  | 0.00743  |
| 57  | C4 | PX  | 0.04726  | 0.00254  | -0.01340 | -0.02839 | 0.03589  |
| 58  | C4 | PY  | 0.01664  | 0.00290  | 0.00728  | -0.03596 | -0.01443 |
| 59  | C4 | PZ  | 0.00000  | 0.00000  | 0.00000  | 0.00000  | 0.00000  |
| 60  | C4 | DXX | -0.00605 | 0.00042  | 0.00217  | 0.01233  | 0.00604  |
| 61  | C4 | DYY | 0.00315  | 0.00401  | 0.00046  | -0.01830 | -0.00934 |
| 62  | C4 | DZZ | 0.00088  | -0.00653 | 0.00032  | 0.00326  | 0.00138  |
| 63  | C4 | DXY | -0.00418 | 0.00082  | -0.00031 | -0.00251 | 0.00290  |
| 64  | C4 | DXZ | 0.00000  | 0.00000  | 0.00000  | 0.00000  | 0.00000  |
| 65  | C4 | DYZ | 0.00000  | 0.00000  | 0.00000  | 0.00000  | 0.00000  |
| 66  | C5 | S   | 0.04337  | 0.04204  | -0.02829 | -0.01478 | -0.03001 |
| 67  | C5 | S   | -0.08825 | -0.08315 | 0.05896  | 0.03039  | 0.05897  |
| 68  | C5 | PX  | -0.09147 | 0.11815  | -0.06156 | 0.11508  | -0.10411 |
| 69  | C5 | PY  | -0.12087 | 0.04637  | 0.09576  | 0.02166  | -0.07418 |
| 70  | C5 | PZ  | 0.00000  | 0.00000  | 0.00000  | 0.00000  | 0.00000  |
| 71  | C5 | S   | -0.07723 | -0.06213 | 0.04892  | 0.00785  | 0.05566  |
| 72  | C5 | PX  | -0.00871 | 0.04251  | -0.03190 | 0.03758  | -0.04391 |
| 73  | C5 | PY  | -0.04097 | -0.00713 | 0.04805  | 0.00764  | -0.02159 |
| 74  | C5 | PZ  | 0.00000  | 0.00000  | 0.00000  | 0.00000  | 0.00000  |
| 75  | C5 | DXX | -0.00975 | 0.00682  | 0.00182  | 0.00702  | -0.00351 |
| 76  | C5 | DYY | 0.00429  | -0.00572 | -0.00016 | -0.00497 | 0.00247  |
| 77  | C5 | DZZ | 0.00379  | 0.00251  | -0.00160 | -0.00120 | -0.00152 |
| 78  | C5 | DXY | 0.00204  | 0.00282  | -0.00153 | -0.00259 | -0.00301 |
| 79  | C5 | DXZ | 0.00000  | 0.00000  | 0.00000  | 0.00000  | 0.00000  |
| 80  | C5 | DYZ | 0.00000  | 0.00000  | 0.00000  | 0.00000  | 0.00000  |
| 81  | C6 | S   | 0.04005  | -0.06350 | 0.00675  | -0.01563 | -0.00295 |
| 82  | C6 | S   | -0.08214 | 0.13213  | -0.01212 | 0.03434  | 0.00679  |
| 83  | C6 | PX  | -0.15669 | -0.06580 | -0.09797 | -0.09750 | 0.12714  |
| 84  | C6 | PY  | -0.01206 | 0.01108  | -0.18498 | -0.05396 | -0.11850 |
| 85  | C6 | PZ  | 0.00000  | 0.00000  | 0.00000  | 0.00000  | 0.00000  |
| 86  | C6 | S   | -0.06085 | 0.13298  | -0.01740 | 0.01348  | -0.01426 |
| 87  | C6 | PX  | -0.05989 | -0.02020 | -0.02049 | -0.03847 | 0.06205  |
| 88  | C6 | PY  | -0.00008 | 0.02213  | -0.06419 | -0.01505 | -0.03838 |
| 89  | C6 | PZ  | 0.00000  | 0.00000  | 0.00000  | 0.00000  | 0.00000  |
| 90  | C6 | DXX | -0.00534 | 0.00236  | -0.01119 | -0.01153 | -0.00134 |
| 91  | C6 | DYY | 0.00252  | -0.00004 | 0.00633  | 0.00733  | 0.00217  |
| 92  | C6 | DZZ | 0.00294  | -0.00448 | -0.00040 | -0.00145 | -0.00154 |
| 93  | C6 | DXY | -0.01156 | -0.00323 | 0.00766  | 0.00336  | 0.00276  |
| 94  | C6 | DXZ | 0.00000  | 0.00000  | 0.00000  | 0.00000  | 0.00000  |
| 95  | C6 | DYZ | 0.00000  | 0.00000  | 0.00000  | 0.00000  | 0.00000  |
| 96  | C7 | S   | -0.05975 | -0.04770 | -0.04055 | -0.03791 | -0.00135 |
| 97  | C7 | S   | 0.12092  | 0.09513  | 0.08175  | 0.07494  | 0.00146  |
| 98  | C7 | PX  | 0.05970  | 0.01987  | 0.11954  | 0.14927  | -0.10850 |
| 99  | C7 | PY  | -0.07849 | -0.08329 | 0.12687  | -0.10779 | -0.01879 |
| 100 | C7 | PZ  | 0.00000  | 0.00000  | 0.00000  | 0.00000  | 0.00000  |
| 101 | C7 | S   | 0.08796  | 0.05525  | 0.06831  | 0.09473  | 0.00882  |
| 102 | C7 | PX  | 0.03556  | 0.03066  | 0.05591  | 0.06012  | -0.04932 |
| 103 | C7 | PY  | -0.02341 | -0.03746 | 0.02237  | -0.03399 | -0.00892 |
| 104 | C7 | PZ  | 0.00000  | 0.00000  | 0.00000  | 0.00000  | 0.00000  |
| 105 | C7 | DXX | 0.00371  | 0.00590  | -0.00092 | 0.00503  | 0.00258  |
| 106 | C7 | DYY | 0.00121  | -0.00202 | -0.00065 | -0.00228 | -0.00197 |



|     |    |     |          |          |          |          |          |
|-----|----|-----|----------|----------|----------|----------|----------|
| 107 | C7 | DZZ | -0.00401 | -0.00340 | -0.00176 | -0.00261 | -0.00069 |
| 108 | C7 | DXY | 0.00813  | 0.00333  | -0.01065 | 0.00645  | -0.00009 |
| 109 | C7 | DXZ | 0.00000  | 0.00000  | 0.00000  | 0.00000  | 0.00000  |
| 110 | C7 | DYZ | 0.00000  | 0.00000  | 0.00000  | 0.00000  | 0.00000  |
| 111 | O1 | S   | -0.00541 | 0.04426  | 0.00584  | -0.02226 | 0.00513  |
| 112 | O1 | S   | 0.01188  | -0.10397 | -0.01222 | 0.05353  | -0.01420 |
| 113 | O1 | PX  | 0.06890  | 0.00467  | -0.05016 | -0.00042 | 0.21744  |
| 114 | O1 | PY  | -0.02850 | -0.19951 | -0.04677 | 0.29547  | 0.08164  |
| 115 | O1 | PZ  | 0.00000  | 0.00000  | 0.00000  | 0.00000  | 0.00000  |
| 116 | O1 | S   | 0.01818  | -0.15403 | -0.02418 | 0.07983  | -0.01290 |
| 117 | O1 | PX  | 0.04114  | 0.00203  | -0.03197 | 0.00150  | 0.14548  |
| 118 | O1 | PY  | -0.01433 | -0.12203 | -0.02600 | 0.18172  | 0.05038  |
| 119 | O1 | PZ  | 0.00000  | 0.00000  | 0.00000  | 0.00000  | 0.00000  |
| 120 | O1 | DXX | 0.00119  | -0.00452 | -0.00221 | 0.00575  | 0.01171  |
| 121 | O1 | DYY | -0.00049 | 0.01087  | 0.00249  | -0.00987 | -0.00837 |
| 122 | O1 | DZZ | -0.00132 | -0.00399 | 0.00071  | 0.00385  | -0.00357 |
| 123 | O1 | DXY | -0.00756 | -0.00832 | 0.00058  | 0.01379  | -0.00643 |
| 124 | O1 | DXZ | 0.00000  | 0.00000  | 0.00000  | 0.00000  | 0.00000  |
| 125 | O1 | DYZ | 0.00000  | 0.00000  | 0.00000  | 0.00000  | 0.00000  |
| 126 | H4 | S   | -0.04954 | -0.06252 | 0.08480  | -0.01972 | 0.03901  |
| 127 | H4 | S   | -0.01702 | -0.02932 | 0.03826  | -0.00679 | 0.01855  |
| 128 | H4 | PX  | -0.00394 | -0.00252 | 0.00412  | -0.00007 | 0.00027  |
| 129 | H4 | PY  | 0.00118  | 0.00464  | -0.00375 | 0.00160  | -0.00414 |
| 130 | H4 | PZ  | 0.00000  | 0.00000  | 0.00000  | 0.00000  | 0.00000  |
| 131 | N1 | S   | -0.01439 | 0.03597  | -0.04039 | -0.01554 | 0.01599  |
| 132 | N1 | S   | 0.03282  | -0.07719 | 0.09163  | 0.03367  | -0.03699 |
| 133 | N1 | PX  | -0.00625 | -0.06884 | -0.13401 | -0.08359 | 0.03669  |
| 134 | N1 | PY  | -0.03887 | 0.12500  | 0.13249  | 0.08354  | 0.12583  |
| 135 | N1 | PZ  | 0.00000  | 0.00000  | 0.00000  | 0.00000  | 0.00000  |
| 136 | N1 | S   | 0.03989  | -0.11124 | 0.08277  | 0.04434  | -0.06203 |
| 137 | N1 | PX  | 0.00397  | -0.03214 | -0.06974 | -0.03831 | 0.01673  |
| 138 | N1 | PY  | -0.02651 | 0.04992  | 0.04588  | 0.03391  | 0.06315  |
| 139 | N1 | PZ  | 0.00000  | 0.00000  | 0.00000  | 0.00000  | 0.00000  |
| 140 | N1 | DXX | 0.00390  | -0.00955 | -0.01764 | -0.00992 | -0.00170 |
| 141 | N1 | DYY | -0.00366 | 0.00924  | 0.01311  | 0.00686  | 0.00398  |
| 142 | N1 | DZZ | 0.00036  | 0.00153  | 0.00161  | 0.00069  | -0.00252 |
| 143 | N1 | DXY | -0.00649 | 0.00592  | 0.00319  | 0.00066  | 0.01396  |
| 144 | N1 | DXZ | 0.00000  | 0.00000  | 0.00000  | 0.00000  | 0.00000  |
| 145 | N1 | DYZ | 0.00000  | 0.00000  | 0.00000  | 0.00000  | 0.00000  |
| 146 | H6 | S   | 0.11992  | -0.01204 | 0.03260  | -0.07956 | -0.02152 |
| 147 | H6 | S   | 0.04952  | -0.01087 | 0.02257  | -0.03823 | -0.01236 |
| 148 | H6 | PX  | 0.00886  | -0.00057 | 0.00194  | -0.00454 | -0.00174 |
| 149 | H6 | PY  | 0.00299  | -0.00244 | 0.00028  | -0.00291 | 0.00202  |
| 150 | H6 | PZ  | 0.00000  | 0.00000  | 0.00000  | 0.00000  | 0.00000  |
| 151 | C8 | S   | -0.03640 | 0.00944  | 0.08766  | 0.00605  | 0.03379  |
| 152 | C8 | S   | 0.07441  | -0.02089 | -0.18051 | -0.01317 | -0.06862 |
| 153 | C8 | PX  | 0.03213  | 0.14963  | 0.01922  | 0.10082  | 0.04747  |
| 154 | C8 | PY  | 0.06173  | 0.02944  | -0.03744 | -0.00111 | 0.12865  |
| 155 | C8 | PZ  | 0.00000  | 0.00000  | 0.00000  | 0.00000  | 0.00000  |
| 156 | C8 | S   | 0.06839  | -0.00284 | -0.15129 | -0.00691 | -0.07104 |
| 157 | C8 | PX  | 0.01900  | 0.03259  | -0.00919 | 0.02725  | 0.00967  |
| 158 | C8 | PY  | 0.03559  | 0.02045  | -0.01817 | 0.00076  | 0.02575  |
| 159 | C8 | PZ  | 0.00000  | 0.00000  | 0.00000  | 0.00000  | 0.00000  |
| 160 | C8 | DXX | 0.00683  | -0.00707 | -0.00244 | 0.00107  | -0.00193 |

|     |     |     |          |          |          |          |          |
|-----|-----|-----|----------|----------|----------|----------|----------|
| 161 | C8  | DYY | -0.00332 | 0.00628  | -0.00082 | -0.00283 | 0.00626  |
| 162 | C8  | DZZ | -0.00266 | 0.00170  | 0.00665  | 0.00127  | 0.00174  |
| 163 | C8  | DXY | 0.00667  | 0.00750  | -0.00135 | 0.00350  | -0.00082 |
| 164 | C8  | DXZ | 0.00000  | 0.00000  | 0.00000  | 0.00000  | 0.00000  |
| 165 | C8  | DYZ | 0.00000  | 0.00000  | 0.00000  | 0.00000  | 0.00000  |
| 166 | H8  | S   | 0.08653  | 0.05824  | 0.09587  | 0.12486  | -0.05693 |
| 167 | H8  | S   | 0.03852  | 0.02286  | 0.04879  | 0.07261  | -0.03202 |
| 168 | H8  | PX  | -0.00667 | -0.00413 | -0.00695 | -0.00819 | 0.00382  |
| 169 | H8  | PY  | -0.00018 | -0.00067 | 0.00255  | -0.00091 | -0.00080 |
| 170 | H8  | PZ  | 0.00000  | 0.00000  | 0.00000  | 0.00000  | 0.00000  |
| 171 | C10 | S   | 0.05192  | -0.01064 | -0.05708 | 0.00604  | -0.02713 |
| 172 | C10 | S   | -0.10200 | 0.01987  | 0.11249  | -0.01285 | 0.05210  |
| 173 | C10 | PX  | 0.00208  | 0.06116  | 0.04399  | 0.06295  | 0.09375  |
| 174 | C10 | PY  | 0.06241  | -0.00790 | -0.15352 | 0.02728  | -0.16326 |
| 175 | C10 | PZ  | 0.00000  | 0.00000  | 0.00000  | 0.00000  | 0.00000  |
| 176 | C10 | S   | -0.08971 | 0.02822  | 0.11725  | -0.01580 | 0.06940  |
| 177 | C10 | PX  | -0.00741 | 0.01659  | 0.01818  | 0.02292  | 0.03725  |
| 178 | C10 | PY  | 0.02447  | 0.00099  | -0.05084 | 0.01391  | -0.05476 |
| 179 | C10 | PZ  | 0.00000  | 0.00000  | 0.00000  | 0.00000  | 0.00000  |
| 180 | C10 | DXX | -0.00513 | 0.00128  | 0.01152  | -0.00048 | 0.01134  |
| 181 | C10 | DYY | 0.00164  | -0.00044 | -0.00572 | 0.00058  | -0.00806 |
| 182 | C10 | DZZ | 0.00447  | -0.00095 | -0.00508 | 0.00033  | -0.00275 |
| 183 | C10 | DXY | -0.00110 | 0.00189  | 0.00366  | -0.00100 | 0.00361  |
| 184 | C10 | DXZ | 0.00000  | 0.00000  | 0.00000  | 0.00000  | 0.00000  |
| 185 | C10 | DYZ | 0.00000  | 0.00000  | 0.00000  | 0.00000  | 0.00000  |
| 186 | H16 | S   | -0.05446 | 0.03989  | 0.10396  | 0.02270  | 0.10798  |
| 187 | H16 | S   | -0.02343 | 0.02356  | 0.05900  | 0.01768  | 0.06922  |
| 188 | H16 | PX  | 0.00428  | -0.00247 | -0.00687 | -0.00088 | -0.00630 |
| 189 | H16 | PY  | -0.00069 | 0.00122  | 0.00105  | 0.00126  | 0.00027  |
| 190 | H16 | PZ  | 0.00000  | 0.00000  | 0.00000  | 0.00000  | 0.00000  |
| 191 | H18 | S   | -0.06636 | -0.01030 | 0.09104  | -0.04051 | 0.05047  |
| 192 | H18 | S   | -0.03287 | -0.00614 | 0.05154  | -0.02072 | 0.03195  |
| 193 | H18 | PX  | -0.00431 | 0.00011  | 0.00595  | -0.00160 | 0.00414  |
| 194 | H18 | PY  | -0.00296 | -0.00113 | 0.00284  | -0.00178 | -0.00030 |
| 195 | H18 | PZ  | 0.00000  | 0.00000  | 0.00000  | 0.00000  | 0.00000  |
| 196 | C9  | S   | 0.02926  | -0.03874 | -0.00927 | 0.01533  | 0.01918  |
| 197 | C9  | S   | -0.05871 | 0.07420  | 0.01713  | -0.02633 | -0.03735 |
| 198 | C9  | PX  | -0.03235 | 0.13325  | 0.05313  | -0.17538 | -0.12929 |
| 199 | C9  | PY  | -0.05540 | 0.00220  | 0.01202  | 0.07437  | -0.11180 |
| 200 | C9  | PZ  | 0.00000  | 0.00000  | 0.00000  | 0.00000  | 0.00000  |
| 201 | C9  | S   | -0.06870 | 0.10817  | 0.03389  | -0.06400 | -0.08003 |
| 202 | C9  | PX  | -0.00637 | 0.03780  | 0.01404  | -0.05771 | -0.03032 |
| 203 | C9  | PY  | -0.02072 | -0.00694 | -0.00011 | 0.04212  | -0.04303 |
| 204 | C9  | PZ  | 0.00000  | 0.00000  | 0.00000  | 0.00000  | 0.00000  |
| 205 | C9  | DXX | 0.00438  | -0.01421 | -0.00535 | 0.01404  | 0.01436  |
| 206 | C9  | DYY | -0.00043 | 0.00262  | 0.00042  | 0.00007  | -0.00332 |
| 207 | C9  | DZZ | -0.00169 | 0.00838  | 0.00336  | -0.01199 | -0.00728 |
| 208 | C9  | DXY | 0.00595  | -0.00714 | -0.00433 | 0.00437  | 0.01453  |
| 209 | C9  | DXZ | 0.00000  | 0.00000  | 0.00000  | 0.00000  | 0.00000  |
| 210 | C9  | DYZ | 0.00000  | 0.00000  | 0.00000  | 0.00000  | 0.00000  |
| 211 | H3  | S   | -0.04945 | 0.02519  | 0.01046  | 0.04028  | -0.07055 |
| 212 | H3  | S   | -0.02146 | 0.00978  | 0.00501  | 0.02649  | -0.03946 |
| 213 | H3  | PX  | -0.00103 | 0.00167  | 0.00066  | -0.00138 | -0.00209 |
| 214 | H3  | PY  | 0.00317  | -0.00211 | -0.00063 | -0.00172 | 0.00346  |

|     |    |    |          |          |          |          |          |
|-----|----|----|----------|----------|----------|----------|----------|
| 215 | H3 | PZ | 0.00000  | 0.00000  | 0.00000  | 0.00000  | 0.00000  |
| 216 | H5 | S  | -0.02453 | 0.06819  | 0.02233  | -0.07585 | -0.04082 |
| 217 | H5 | S  | -0.01074 | 0.03130  | 0.01166  | -0.04388 | -0.02506 |
| 218 | H5 | PX | 0.00085  | -0.00085 | -0.00008 | 0.00020  | -0.00021 |
| 219 | H5 | PY | -0.00131 | 0.00132  | 0.00045  | -0.00031 | -0.00208 |
| 220 | H5 | PZ | -0.00183 | 0.00428  | 0.00130  | -0.00447 | -0.00243 |
| 221 | H7 | S  | -0.02453 | 0.06819  | 0.02233  | -0.07585 | -0.04082 |
| 222 | H7 | S  | -0.01074 | 0.03130  | 0.01166  | -0.04388 | -0.02506 |
| 223 | H7 | PX | 0.00085  | -0.00085 | -0.00008 | 0.00020  | -0.00021 |
| 224 | H7 | PY | -0.00131 | 0.00132  | 0.00045  | -0.00031 | -0.00208 |
| 225 | H7 | PZ | 0.00183  | -0.00428 | -0.00130 | 0.00447  | 0.00243  |

|              |           |           |           |           |           |
|--------------|-----------|-----------|-----------|-----------|-----------|
| MO:          | 26        | 27        | 28        | 29        | 30        |
| Eigenvalues: | -0.66680  | -0.66574  | -0.63677  | -0.61061  | -0.59333  |
| (ev):        | -18.14466 | -18.11570 | -17.32740 | -16.61563 | -16.14528 |

|    |    |     |          |          |          |          |          |
|----|----|-----|----------|----------|----------|----------|----------|
|    |    | A   | A        | A        | A        | A        |          |
| 1  | H1 | S   | 0.00000  | 0.13519  | 0.06131  | 0.16822  | 0.09789  |
| 2  | H1 | S   | 0.00000  | 0.08301  | 0.04297  | 0.12321  | 0.07031  |
| 3  | H1 | PX  | 0.00000  | -0.00715 | -0.00233 | -0.00856 | -0.00547 |
| 4  | H1 | PY  | 0.00000  | -0.00302 | -0.00140 | -0.00269 | 0.00038  |
| 5  | H1 | PZ  | -0.00145 | 0.00000  | 0.00000  | 0.00000  | 0.00000  |
| 6  | C1 | S   | 0.00000  | -0.04170 | 0.01101  | -0.02142 | -0.00632 |
| 7  | C1 | S   | 0.00000  | 0.08374  | -0.02000 | 0.03999  | 0.00888  |
| 8  | C1 | PX  | 0.00000  | 0.16674  | 0.12658  | 0.21386  | 0.08818  |
| 9  | C1 | PY  | 0.00000  | -0.01534 | -0.04094 | 0.08491  | 0.19323  |
| 10 | C1 | PZ  | -0.05881 | 0.00000  | 0.00000  | 0.00000  | 0.00000  |
| 11 | C1 | S   | 0.00000  | 0.07304  | -0.04885 | 0.06053  | 0.02433  |
| 12 | C1 | PX  | 0.00000  | 0.08496  | 0.06698  | 0.09687  | 0.04890  |
| 13 | C1 | PY  | 0.00000  | 0.01004  | 0.00426  | 0.03108  | 0.08471  |
| 14 | C1 | PZ  | -0.03466 | 0.00000  | 0.00000  | 0.00000  | 0.00000  |
| 15 | C1 | DXX | 0.00000  | 0.00447  | 0.00025  | 0.01035  | 0.01028  |
| 16 | C1 | DYY | 0.00000  | -0.00242 | 0.00115  | -0.00872 | -0.01192 |
| 17 | C1 | DZZ | 0.00000  | -0.00242 | 0.00024  | -0.00153 | -0.00056 |
| 18 | C1 | DXY | 0.00000  | 0.01134  | 0.00836  | 0.00611  | -0.00346 |
| 19 | C1 | DXZ | 0.00515  | 0.00000  | 0.00000  | 0.00000  | 0.00000  |
| 20 | C1 | DYZ | -0.00387 | 0.00000  | 0.00000  | 0.00000  | 0.00000  |
| 21 | C2 | S   | 0.00000  | 0.02483  | 0.02784  | -0.01871 | 0.01434  |
| 22 | C2 | S   | 0.00000  | -0.05255 | -0.05625 | 0.03853  | -0.02919 |
| 23 | C2 | PX  | 0.00000  | -0.02340 | 0.24902  | 0.17614  | 0.04900  |
| 24 | C2 | PY  | 0.00000  | -0.04401 | 0.11732  | 0.10838  | -0.15818 |
| 25 | C2 | PZ  | -0.01899 | 0.00000  | 0.00000  | 0.00000  | 0.00000  |
| 26 | C2 | S   | 0.00000  | -0.00956 | -0.06198 | 0.04061  | -0.01048 |
| 27 | C2 | PX  | 0.00000  | 0.01845  | 0.13053  | 0.07601  | 0.03636  |
| 28 | C2 | PY  | 0.00000  | -0.00076 | 0.05073  | 0.03111  | -0.04679 |
| 29 | C2 | PZ  | -0.00761 | 0.00000  | 0.00000  | 0.00000  | 0.00000  |
| 30 | C2 | DXX | 0.00000  | -0.00025 | -0.01116 | -0.00614 | 0.00445  |
| 31 | C2 | DYY | 0.00000  | 0.00125  | 0.00887  | 0.00495  | -0.00162 |
| 32 | C2 | DZZ | 0.00000  | 0.00107  | 0.00205  | -0.00051 | 0.00058  |
| 33 | C2 | DXY | 0.00000  | -0.00676 | -0.00735 | 0.00157  | -0.01135 |
| 34 | C2 | DXZ | -0.00106 | 0.00000  | 0.00000  | 0.00000  | 0.00000  |
| 35 | C2 | DYZ | -0.00157 | 0.00000  | 0.00000  | 0.00000  | 0.00000  |
| 36 | C3 | S   | 0.00000  | 0.01524  | 0.00693  | 0.03949  | 0.02437  |
| 37 | C3 | S   | 0.00000  | -0.03105 | -0.01414 | -0.08142 | -0.05195 |

|    |    |     |          |          |          |          |          |
|----|----|-----|----------|----------|----------|----------|----------|
| 38 | C3 | PX  | 0.00000  | -0.09255 | -0.02838 | 0.01088  | -0.01001 |
| 39 | C3 | PY  | 0.00000  | 0.06981  | 0.04774  | -0.06355 | -0.18005 |
| 40 | C3 | PZ  | -0.02055 | 0.00000  | 0.00000  | 0.00000  | 0.00000  |
| 41 | C3 | S   | 0.00000  | -0.02589 | 0.02313  | -0.10820 | -0.04050 |
| 42 | C3 | PX  | 0.00000  | -0.03488 | -0.01707 | -0.00244 | -0.01752 |
| 43 | C3 | PY  | 0.00000  | 0.04573  | 0.02619  | -0.02309 | -0.06511 |
| 44 | C3 | PZ  | -0.00619 | 0.00000  | 0.00000  | 0.00000  | 0.00000  |
| 45 | C3 | DXX | 0.00000  | 0.00076  | 0.00832  | 0.00053  | 0.00632  |
| 46 | C3 | DYY | 0.00000  | 0.00206  | -0.00783 | -0.00275 | -0.00741 |
| 47 | C3 | DZZ | 0.00000  | 0.00017  | 0.00047  | 0.00136  | 0.00103  |
| 48 | C3 | DXY | 0.00000  | 0.01448  | 0.00358  | 0.00296  | -0.00337 |
| 49 | C3 | DXZ | 0.00014  | 0.00000  | 0.00000  | 0.00000  | 0.00000  |
| 50 | C3 | DYZ | -0.00123 | 0.00000  | 0.00000  | 0.00000  | 0.00000  |
| 51 | C4 | S   | 0.00000  | 0.03909  | 0.03787  | 0.01496  | -0.00783 |
| 52 | C4 | S   | 0.00000  | -0.08616 | -0.08146 | -0.03314 | 0.01776  |
| 53 | C4 | PX  | 0.00000  | -0.02548 | -0.02913 | -0.05564 | 0.01922  |
| 54 | C4 | PY  | 0.00000  | 0.06051  | 0.08757  | 0.04116  | -0.06621 |
| 55 | C4 | PZ  | -0.14054 | 0.00000  | 0.00000  | 0.00000  | 0.00000  |
| 56 | C4 | S   | 0.00000  | -0.04797 | -0.06978 | -0.01869 | 0.03370  |
| 57 | C4 | PX  | 0.00000  | -0.00960 | -0.00873 | -0.01469 | -0.00347 |
| 58 | C4 | PY  | 0.00000  | -0.00222 | -0.00947 | 0.01352  | -0.01020 |
| 59 | C4 | PZ  | -0.06533 | 0.00000  | 0.00000  | 0.00000  | 0.00000  |
| 60 | C4 | DXX | 0.00000  | 0.00372  | -0.00016 | 0.00074  | 0.01488  |
| 61 | C4 | DYY | 0.00000  | -0.00266 | 0.00532  | -0.00010 | -0.01804 |
| 62 | C4 | DZZ | 0.00000  | 0.00193  | 0.00033  | 0.00060  | 0.00163  |
| 63 | C4 | DXY | 0.00000  | -0.00566 | 0.01529  | -0.00019 | -0.00279 |
| 64 | C4 | DXZ | -0.00273 | 0.00000  | 0.00000  | 0.00000  | 0.00000  |
| 65 | C4 | DYZ | -0.01386 | 0.00000  | 0.00000  | 0.00000  | 0.00000  |
| 66 | C5 | S   | 0.00000  | -0.02036 | -0.03819 | 0.00153  | -0.00927 |
| 67 | C5 | S   | 0.00000  | 0.04320  | 0.07866  | -0.00158 | 0.01766  |
| 68 | C5 | PX  | 0.00000  | -0.11545 | -0.02276 | 0.09343  | -0.01734 |
| 69 | C5 | PY  | 0.00000  | 0.14895  | -0.07374 | -0.19609 | 0.18518  |
| 70 | C5 | PZ  | -0.03835 | 0.00000  | 0.00000  | 0.00000  | 0.00000  |
| 71 | C5 | S   | 0.00000  | 0.02123  | 0.05903  | -0.02064 | 0.02221  |
| 72 | C5 | PX  | 0.00000  | -0.06628 | -0.03035 | 0.04806  | -0.02201 |
| 73 | C5 | PY  | 0.00000  | 0.08495  | 0.00055  | -0.07576 | 0.07919  |
| 74 | C5 | PZ  | -0.02128 | 0.00000  | 0.00000  | 0.00000  | 0.00000  |
| 75 | C5 | DXX | 0.00000  | -0.00057 | -0.00840 | -0.00898 | 0.00592  |
| 76 | C5 | DYY | 0.00000  | 0.00112  | 0.00762  | 0.00522  | -0.00255 |
| 77 | C5 | DZZ | 0.00000  | -0.00130 | -0.00183 | 0.00062  | -0.00105 |
| 78 | C5 | DXY | 0.00000  | -0.00884 | -0.00556 | 0.00726  | -0.01062 |
| 79 | C5 | DXZ | -0.00358 | 0.00000  | 0.00000  | 0.00000  | 0.00000  |
| 80 | C5 | DYZ | -0.00042 | 0.00000  | 0.00000  | 0.00000  | 0.00000  |
| 81 | C6 | S   | 0.00000  | -0.04351 | -0.02974 | 0.00329  | -0.04001 |
| 82 | C6 | S   | 0.00000  | 0.09570  | 0.06321  | -0.00804 | 0.08713  |
| 83 | C6 | PX  | 0.00000  | 0.02407  | -0.00947 | -0.01638 | -0.04887 |
| 84 | C6 | PY  | 0.00000  | -0.05608 | 0.05784  | 0.05462  | 0.06813  |
| 85 | C6 | PZ  | -0.01278 | 0.00000  | 0.00000  | 0.00000  | 0.00000  |
| 86 | C6 | S   | 0.00000  | 0.07597  | 0.04900  | -0.02451 | 0.08668  |
| 87 | C6 | PX  | 0.00000  | 0.01651  | -0.00829 | 0.00400  | -0.02435 |
| 88 | C6 | PY  | 0.00000  | -0.02847 | 0.01162  | 0.01299  | 0.00720  |
| 89 | C6 | PZ  | -0.00787 | 0.00000  | 0.00000  | 0.00000  | 0.00000  |
| 90 | C6 | DXX | 0.00000  | -0.00066 | -0.00685 | -0.00291 | 0.00750  |
| 91 | C6 | DYY | 0.00000  | -0.00011 | 0.00641  | 0.00556  | -0.00803 |

|     |    |     |          |          |          |          |          |
|-----|----|-----|----------|----------|----------|----------|----------|
| 92  | C6 | DZZ | 0.00000  | -0.00285 | -0.00098 | 0.00001  | -0.00113 |
| 93  | C6 | DXY | 0.00000  | 0.00447  | 0.00206  | -0.01299 | -0.00685 |
| 94  | C6 | DXZ | -0.00030 | 0.00000  | 0.00000  | 0.00000  | 0.00000  |
| 95  | C6 | DYZ | -0.00030 | 0.00000  | 0.00000  | 0.00000  | 0.00000  |
| 96  | C7 | S   | 0.00000  | 0.03415  | -0.00399 | -0.00791 | -0.01884 |
| 97  | C7 | S   | 0.00000  | -0.06875 | 0.00725  | 0.01652  | 0.03988  |
| 98  | C7 | PX  | 0.00000  | -0.08398 | 0.14560  | -0.05993 | -0.03999 |
| 99  | C7 | PY  | 0.00000  | -0.16399 | -0.00943 | -0.04447 | 0.05441  |
| 100 | C7 | PZ  | -0.00764 | 0.00000  | 0.00000  | 0.00000  | 0.00000  |
| 101 | C7 | S   | 0.00000  | -0.05357 | 0.01357  | 0.02305  | 0.01352  |
| 102 | C7 | PX  | 0.00000  | -0.05195 | 0.06623  | -0.03156 | 0.00282  |
| 103 | C7 | PY  | 0.00000  | -0.05271 | -0.00241 | -0.00941 | 0.03247  |
| 104 | C7 | PZ  | -0.00432 | 0.00000  | 0.00000  | 0.00000  | 0.00000  |
| 105 | C7 | DXX | 0.00000  | -0.00300 | 0.00386  | 0.00310  | 0.00132  |
| 106 | C7 | DYY | 0.00000  | 0.00550  | -0.00339 | -0.00155 | -0.00185 |
| 107 | C7 | DZZ | 0.00000  | 0.00133  | -0.00025 | -0.00094 | -0.00070 |
| 108 | C7 | DXY | 0.00000  | 0.01187  | -0.00176 | 0.00432  | -0.00506 |
| 109 | C7 | DXZ | 0.00074  | 0.00000  | 0.00000  | 0.00000  | 0.00000  |
| 110 | C7 | DYZ | -0.00074 | 0.00000  | 0.00000  | 0.00000  | 0.00000  |
| 111 | O1 | S   | 0.00000  | -0.00756 | 0.00643  | -0.01749 | 0.00779  |
| 112 | O1 | S   | 0.00000  | 0.01892  | -0.01958 | 0.04467  | -0.01633 |
| 113 | O1 | PX  | 0.00000  | -0.09240 | 0.18061  | -0.21438 | 0.03483  |
| 114 | O1 | PY  | 0.00000  | 0.02412  | -0.08231 | 0.02150  | 0.10904  |
| 115 | O1 | PZ  | -0.40066 | 0.00000  | 0.00000  | 0.00000  | 0.00000  |
| 116 | O1 | S   | 0.00000  | 0.02772  | -0.00779 | 0.05747  | -0.03823 |
| 117 | O1 | PX  | 0.00000  | -0.06477 | 0.12437  | -0.15219 | 0.02360  |
| 118 | O1 | PY  | 0.00000  | 0.01820  | -0.05386 | 0.01879  | 0.07307  |
| 119 | O1 | PZ  | -0.26458 | 0.00000  | 0.00000  | 0.00000  | 0.00000  |
| 120 | O1 | DXX | 0.00000  | -0.00295 | 0.00939  | -0.01144 | 0.00424  |
| 121 | O1 | DYY | 0.00000  | -0.00030 | -0.00746 | 0.00604  | -0.00188 |
| 122 | O1 | DZZ | 0.00000  | 0.00250  | -0.00474 | 0.00546  | 0.00043  |
| 123 | O1 | DXY | 0.00000  | 0.00365  | -0.00887 | 0.00698  | 0.00362  |
| 124 | O1 | DXZ | -0.01809 | 0.00000  | 0.00000  | 0.00000  | 0.00000  |
| 125 | O1 | DYZ | 0.01235  | 0.00000  | 0.00000  | 0.00000  | 0.00000  |
| 126 | H4 | S   | 0.00000  | 0.13156  | 0.01793  | -0.12666 | 0.10417  |
| 127 | H4 | S   | 0.00000  | 0.07609  | -0.00697 | -0.08246 | 0.07454  |
| 128 | H4 | PX  | 0.00000  | 0.00569  | 0.00006  | -0.00436 | 0.00437  |
| 129 | H4 | PY  | 0.00000  | -0.00489 | -0.00219 | 0.00466  | -0.00239 |
| 130 | H4 | PZ  | -0.00090 | 0.00000  | 0.00000  | 0.00000  | 0.00000  |
| 131 | N1 | S   | 0.00000  | 0.03760  | -0.01122 | 0.00350  | 0.03446  |
| 132 | N1 | S   | 0.00000  | -0.08240 | 0.02469  | -0.00945 | -0.07499 |
| 133 | N1 | PX  | 0.00000  | -0.01417 | -0.03453 | 0.08633  | -0.01322 |
| 134 | N1 | PY  | 0.00000  | 0.16044  | -0.01297 | -0.03641 | 0.01407  |
| 135 | N1 | PZ  | -0.00802 | 0.00000  | 0.00000  | 0.00000  | 0.00000  |
| 136 | N1 | S   | 0.00000  | -0.13827 | 0.03907  | -0.00074 | -0.12222 |
| 137 | N1 | PX  | 0.00000  | -0.00337 | -0.01888 | 0.05132  | -0.00277 |
| 138 | N1 | PY  | 0.00000  | 0.07456  | -0.00609 | -0.01214 | 0.00163  |
| 139 | N1 | PZ  | -0.00394 | 0.00000  | 0.00000  | 0.00000  | 0.00000  |
| 140 | N1 | DXX | 0.00000  | -0.00493 | -0.00449 | 0.00887  | -0.00089 |
| 141 | N1 | DYY | 0.00000  | 0.00909  | 0.00187  | -0.00752 | 0.00504  |
| 142 | N1 | DZZ | 0.00000  | -0.00071 | 0.00119  | -0.00186 | 0.00055  |
| 143 | N1 | DXY | 0.00000  | 0.00939  | -0.00324 | 0.00145  | -0.00174 |
| 144 | N1 | DXZ | -0.00051 | 0.00000  | 0.00000  | 0.00000  | 0.00000  |
| 145 | N1 | DYZ | -0.00072 | 0.00000  | 0.00000  | 0.00000  | 0.00000  |

|     |     |     |          |          |          |          |          |
|-----|-----|-----|----------|----------|----------|----------|----------|
| 146 | H6  | S   | 0.00000  | -0.00642 | -0.19416 | -0.10381 | -0.01513 |
| 147 | H6  | S   | 0.00000  | 0.00360  | -0.11850 | -0.07692 | -0.00542 |
| 148 | H6  | PX  | 0.00000  | -0.00060 | -0.01016 | -0.00520 | -0.00053 |
| 149 | H6  | PY  | 0.00000  | -0.00072 | -0.00314 | -0.00073 | -0.00263 |
| 150 | H6  | PZ  | -0.00042 | 0.00000  | 0.00000  | 0.00000  | 0.00000  |
| 151 | C8  | S   | 0.00000  | -0.04177 | 0.00160  | 0.00538  | -0.00529 |
| 152 | C8  | S   | 0.00000  | 0.08657  | -0.00444 | -0.00936 | 0.00937  |
| 153 | C8  | PX  | 0.00000  | 0.18515  | -0.00806 | -0.04445 | -0.00859 |
| 154 | C8  | PY  | 0.00000  | -0.00779 | -0.09522 | 0.17134  | -0.06158 |
| 155 | C8  | PZ  | -0.00458 | 0.00000  | 0.00000  | 0.00000  | 0.00000  |
| 156 | C8  | S   | 0.00000  | 0.07050  | -0.00373 | -0.00003 | 0.02351  |
| 157 | C8  | PX  | 0.00000  | 0.05415  | -0.00534 | -0.00432 | 0.02303  |
| 158 | C8  | PY  | 0.00000  | 0.00093  | -0.02199 | 0.03904  | 0.00259  |
| 159 | C8  | PZ  | -0.00212 | 0.00000  | 0.00000  | 0.00000  | 0.00000  |
| 160 | C8  | DXX | 0.00000  | -0.00946 | 0.00021  | 0.00821  | -0.01125 |
| 161 | C8  | DYY | 0.00000  | 0.00784  | -0.00346 | -0.00259 | 0.00995  |
| 162 | C8  | DZZ | 0.00000  | -0.00113 | 0.00037  | -0.00075 | 0.00012  |
| 163 | C8  | DXY | 0.00000  | -0.00136 | -0.00119 | 0.00239  | 0.01080  |
| 164 | C8  | DXZ | 0.00018  | 0.00000  | 0.00000  | 0.00000  | 0.00000  |
| 165 | C8  | DYZ | -0.00028 | 0.00000  | 0.00000  | 0.00000  | 0.00000  |
| 166 | H8  | S   | 0.00000  | -0.07637 | 0.09307  | -0.02312 | -0.00696 |
| 167 | H8  | S   | 0.00000  | -0.04162 | 0.06353  | -0.01120 | -0.01302 |
| 168 | H8  | PX  | 0.00000  | 0.00483  | -0.00519 | 0.00155  | 0.00020  |
| 169 | H8  | PY  | 0.00000  | -0.00262 | 0.00054  | -0.00061 | 0.00109  |
| 170 | H8  | PZ  | -0.00012 | 0.00000  | 0.00000  | 0.00000  | 0.00000  |
| 171 | C10 | S   | 0.00000  | 0.01053  | 0.00420  | 0.00059  | -0.00487 |
| 172 | C10 | S   | 0.00000  | -0.02199 | -0.00787 | -0.00230 | 0.01124  |
| 173 | C10 | PX  | 0.00000  | 0.13466  | -0.03838 | 0.03337  | -0.30449 |
| 174 | C10 | PY  | 0.00000  | 0.16030  | 0.07629  | -0.17309 | -0.00037 |
| 175 | C10 | PZ  | -0.00175 | 0.00000  | 0.00000  | 0.00000  | 0.00000  |
| 176 | C10 | S   | 0.00000  | -0.02631 | -0.01314 | 0.00075  | 0.01931  |
| 177 | C10 | PX  | 0.00000  | 0.05809  | -0.01576 | 0.01162  | -0.15249 |
| 178 | C10 | PY  | 0.00000  | 0.06366  | 0.03014  | -0.07018 | -0.01334 |
| 179 | C10 | PZ  | -0.00081 | 0.00000  | 0.00000  | 0.00000  | 0.00000  |
| 180 | C10 | DXX | 0.00000  | -0.00640 | -0.00471 | 0.00959  | -0.00932 |
| 181 | C10 | DYY | 0.00000  | 0.00344  | 0.00374  | -0.00698 | 0.00777  |
| 182 | C10 | DZZ | 0.00000  | 0.00122  | 0.00052  | -0.00066 | 0.00024  |
| 183 | C10 | DXY | 0.00000  | -0.00628 | -0.00158 | 0.00394  | 0.01363  |
| 184 | C10 | DXZ | 0.00005  | 0.00000  | 0.00000  | 0.00000  | 0.00000  |
| 185 | C10 | DYZ | -0.00022 | 0.00000  | 0.00000  | 0.00000  | 0.00000  |
| 186 | H16 | S   | 0.00000  | 0.02940  | -0.04099 | 0.05634  | -0.18132 |
| 187 | H16 | S   | 0.00000  | 0.01771  | -0.02779 | 0.04442  | -0.13822 |
| 188 | H16 | PX  | 0.00000  | -0.00087 | 0.00227  | -0.00294 | 0.00770  |
| 189 | H16 | PY  | 0.00000  | 0.00295  | 0.00034  | -0.00139 | -0.00388 |
| 190 | H16 | PZ  | -0.00004 | 0.00000  | 0.00000  | 0.00000  | 0.00000  |
| 191 | H18 | S   | 0.00000  | -0.13134 | -0.01873 | 0.05740  | 0.14597  |
| 192 | H18 | S   | 0.00000  | -0.08414 | -0.01246 | 0.04162  | 0.09397  |
| 193 | H18 | PX  | 0.00000  | -0.00548 | -0.00145 | 0.00339  | 0.00413  |
| 194 | H18 | PY  | 0.00000  | -0.00465 | 0.00046  | -0.00008 | 0.00646  |
| 195 | H18 | PZ  | -0.00004 | 0.00000  | 0.00000  | 0.00000  | 0.00000  |
| 196 | C9  | S   | 0.00000  | 0.00245  | 0.00335  | 0.00561  | 0.00515  |
| 197 | C9  | S   | 0.00000  | -0.00663 | -0.00854 | -0.01329 | -0.00970 |
| 198 | C9  | PX  | 0.00000  | 0.03067  | 0.02408  | 0.04930  | -0.08657 |
| 199 | C9  | PY  | 0.00000  | 0.02472  | -0.23187 | 0.14276  | 0.03471  |

|     |    |     |          |          |          |          |          |
|-----|----|-----|----------|----------|----------|----------|----------|
| 200 | C9 | PZ  | -0.31445 | 0.00000  | 0.00000  | 0.00000  | 0.00000  |
| 201 | C9 | S   | 0.00000  | 0.00704  | -0.02188 | 0.01224  | -0.02238 |
| 202 | C9 | PX  | 0.00000  | 0.00553  | 0.02415  | 0.00381  | -0.03306 |
| 203 | C9 | PY  | 0.00000  | 0.00290  | -0.10782 | 0.05543  | 0.01463  |
| 204 | C9 | PZ  | -0.12903 | 0.00000  | 0.00000  | 0.00000  | 0.00000  |
| 205 | C9 | DXX | 0.00000  | -0.00249 | 0.00726  | -0.00848 | 0.00461  |
| 206 | C9 | DYY | 0.00000  | -0.00038 | -0.01059 | 0.00530  | 0.00232  |
| 207 | C9 | DZZ | 0.00000  | 0.00170  | 0.00480  | 0.00096  | -0.00614 |
| 208 | C9 | DXY | 0.00000  | -0.00466 | 0.01104  | -0.01184 | 0.00200  |
| 209 | C9 | DXZ | -0.00428 | 0.00000  | 0.00000  | 0.00000  | 0.00000  |
| 210 | C9 | DYZ | 0.01540  | 0.00000  | 0.00000  | 0.00000  | 0.00000  |
| 211 | H3 | S   | 0.00000  | 0.00879  | -0.14637 | 0.07842  | 0.02524  |
| 212 | H3 | S   | 0.00000  | 0.00782  | -0.10136 | 0.06080  | 0.02305  |
| 213 | H3 | PX  | 0.00000  | 0.00039  | -0.00122 | 0.00119  | -0.00077 |
| 214 | H3 | PY  | 0.00000  | -0.00024 | 0.00652  | -0.00314 | -0.00106 |
| 215 | H3 | PZ  | -0.00480 | 0.00000  | 0.00000  | 0.00000  | 0.00000  |
| 216 | H5 | S   | 0.14889  | 0.00619  | 0.03925  | -0.00724 | -0.03672 |
| 217 | H5 | S   | 0.11158  | 0.00611  | 0.02785  | -0.00212 | -0.02704 |
| 218 | H5 | PX  | -0.00577 | 0.00040  | -0.00090 | 0.00125  | 0.00019  |
| 219 | H5 | PY  | 0.00255  | 0.00017  | -0.00244 | 0.00138  | -0.00041 |
| 220 | H5 | PZ  | 0.00469  | 0.00020  | 0.00240  | -0.00075 | -0.00227 |
| 221 | H7 | S   | -0.14889 | 0.00619  | 0.03925  | -0.00724 | -0.03672 |
| 222 | H7 | S   | -0.11158 | 0.00611  | 0.02785  | -0.00212 | -0.02704 |
| 223 | H7 | PX  | 0.00577  | 0.00040  | -0.00090 | 0.00125  | 0.00019  |
| 224 | H7 | PY  | -0.00255 | 0.00017  | -0.00244 | 0.00138  | -0.00041 |
| 225 | H7 | PZ  | 0.00469  | -0.00020 | -0.00240 | 0.00075  | 0.00227  |

|              |  |           |           |           |           |           |
|--------------|--|-----------|-----------|-----------|-----------|-----------|
| MO:          |  | 31        | 32        | 33        | 34        | 35        |
| Eigenvalues: |  | -0.57233  | -0.56064  | -0.55923  | -0.53266  | -0.51654  |
| (ev):        |  | -15.57390 | -15.25578 | -15.21754 | -14.49451 | -14.05566 |

|    |    |     |          |          |          |          |          |
|----|----|-----|----------|----------|----------|----------|----------|
|    |    | A   | A        | A        | A        | A        |          |
| 1  | H1 | S   | 0.04066  | 0.02166  | 0.00000  | 0.01612  | 0.00000  |
| 2  | H1 | S   | 0.03337  | 0.02542  | 0.00000  | 0.00751  | 0.00000  |
| 3  | H1 | PX  | -0.00136 | 0.00013  | 0.00000  | -0.00138 | 0.00000  |
| 4  | H1 | PY  | -0.00070 | -0.00078 | 0.00000  | 0.00018  | 0.00000  |
| 5  | H1 | PZ  | 0.00000  | 0.00000  | 0.00224  | 0.00000  | 0.00123  |
| 6  | C1 | S   | 0.01459  | -0.00550 | 0.00000  | 0.00864  | 0.00000  |
| 7  | C1 | S   | -0.03071 | 0.00835  | 0.00000  | -0.01836 | 0.00000  |
| 8  | C1 | PX  | 0.08661  | 0.03933  | 0.00000  | 0.02380  | 0.00000  |
| 9  | C1 | PY  | 0.00860  | -0.09128 | 0.00000  | 0.08984  | 0.00000  |
| 10 | C1 | PZ  | 0.00000  | 0.00000  | 0.11241  | 0.00000  | 0.08591  |
| 11 | C1 | S   | -0.03155 | 0.04429  | 0.00000  | -0.04476 | 0.00000  |
| 12 | C1 | PX  | 0.03014  | 0.00546  | 0.00000  | 0.01952  | 0.00000  |
| 13 | C1 | PY  | 0.01873  | -0.04365 | 0.00000  | 0.06011  | 0.00000  |
| 14 | C1 | PZ  | 0.00000  | 0.00000  | 0.06295  | 0.00000  | 0.05449  |
| 15 | C1 | DXX | 0.00449  | 0.00273  | 0.00000  | 0.00046  | 0.00000  |
| 16 | C1 | DYY | -0.00431 | -0.00134 | 0.00000  | -0.00149 | 0.00000  |
| 17 | C1 | DZZ | 0.00050  | -0.00068 | 0.00000  | -0.00010 | 0.00000  |
| 18 | C1 | DXY | -0.00297 | 0.00811  | 0.00000  | -0.00398 | 0.00000  |
| 19 | C1 | DXZ | 0.00000  | 0.00000  | -0.00728 | 0.00000  | -0.00831 |
| 20 | C1 | DYZ | 0.00000  | 0.00000  | -0.00255 | 0.00000  | 0.00653  |
| 21 | C2 | S   | -0.00651 | -0.00326 | 0.00000  | 0.00112  | 0.00000  |
| 22 | C2 | S   | 0.01665  | 0.00398  | 0.00000  | 0.00149  | 0.00000  |

|    |    |     |          |          |          |          |          |
|----|----|-----|----------|----------|----------|----------|----------|
| 23 | C2 | PX  | 0.03659  | -0.03078 | 0.00000  | 0.12026  | 0.00000  |
| 24 | C2 | PY  | -0.05283 | -0.22527 | 0.00000  | -0.13517 | 0.00000  |
| 25 | C2 | PZ  | 0.00000  | 0.00000  | 0.12140  | 0.00000  | 0.01884  |
| 26 | C2 | S   | -0.00409 | 0.03703  | 0.00000  | -0.01399 | 0.00000  |
| 27 | C2 | PX  | -0.00288 | -0.00748 | 0.00000  | 0.05935  | 0.00000  |
| 28 | C2 | PY  | -0.02948 | -0.08480 | 0.00000  | -0.05696 | 0.00000  |
| 29 | C2 | PZ  | 0.00000  | 0.00000  | 0.06650  | 0.00000  | 0.01421  |
| 30 | C2 | DXX | 0.00008  | 0.01252  | 0.00000  | 0.00307  | 0.00000  |
| 31 | C2 | DYY | 0.00075  | -0.00921 | 0.00000  | -0.00209 | 0.00000  |
| 32 | C2 | DZZ | 0.00033  | -0.00112 | 0.00000  | 0.00061  | 0.00000  |
| 33 | C2 | DXY | 0.00396  | -0.00428 | 0.00000  | -0.01425 | 0.00000  |
| 34 | C2 | DXZ | 0.00000  | 0.00000  | 0.00814  | 0.00000  | -0.00036 |
| 35 | C2 | DYZ | 0.00000  | 0.00000  | 0.00129  | 0.00000  | 0.00595  |
| 36 | C3 | S   | -0.01603 | 0.01705  | 0.00000  | -0.00527 | 0.00000  |
| 37 | C3 | S   | 0.03403  | -0.03629 | 0.00000  | 0.01069  | 0.00000  |
| 38 | C3 | PX  | 0.23169  | -0.02858 | 0.00000  | 0.01230  | 0.00000  |
| 39 | C3 | PY  | -0.14982 | 0.11103  | 0.00000  | -0.09141 | 0.00000  |
| 40 | C3 | PZ  | 0.00000  | 0.00000  | 0.18426  | 0.00000  | -0.03999 |
| 41 | C3 | S   | 0.00533  | -0.06184 | 0.00000  | 0.02838  | 0.00000  |
| 42 | C3 | PX  | 0.10726  | -0.02247 | 0.00000  | 0.01124  | 0.00000  |
| 43 | C3 | PY  | -0.02204 | 0.03115  | 0.00000  | -0.00909 | 0.00000  |
| 44 | C3 | PZ  | 0.00000  | 0.00000  | 0.10895  | 0.00000  | -0.02610 |
| 45 | C3 | DXX | -0.01131 | -0.00328 | 0.00000  | 0.00651  | 0.00000  |
| 46 | C3 | DYY | 0.00578  | 0.00404  | 0.00000  | -0.00749 | 0.00000  |
| 47 | C3 | DZZ | 0.00005  | 0.00009  | 0.00000  | 0.00011  | 0.00000  |
| 48 | C3 | DXY | -0.01069 | 0.00320  | 0.00000  | -0.00722 | 0.00000  |
| 49 | C3 | DXZ | 0.00000  | 0.00000  | -0.00302 | 0.00000  | 0.00117  |
| 50 | C3 | DYZ | 0.00000  | 0.00000  | -0.00712 | 0.00000  | 0.00822  |
| 51 | C4 | S   | -0.01829 | 0.01035  | 0.00000  | -0.00822 | 0.00000  |
| 52 | C4 | S   | 0.04460  | -0.02068 | 0.00000  | 0.01936  | 0.00000  |
| 53 | C4 | PX  | -0.16130 | -0.16175 | 0.00000  | 0.08116  | 0.00000  |
| 54 | C4 | PY  | -0.07228 | -0.06828 | 0.00000  | 0.06201  | 0.00000  |
| 55 | C4 | PZ  | 0.00000  | 0.00000  | 0.10870  | 0.00000  | 0.19874  |
| 56 | C4 | S   | 0.04197  | -0.00872 | 0.00000  | -0.00379 | 0.00000  |
| 57 | C4 | PX  | -0.06314 | -0.07348 | 0.00000  | 0.04058  | 0.00000  |
| 58 | C4 | PY  | -0.00641 | -0.01219 | 0.00000  | 0.00964  | 0.00000  |
| 59 | C4 | PZ  | 0.00000  | 0.00000  | 0.06189  | 0.00000  | 0.11993  |
| 60 | C4 | DXX | 0.01233  | 0.01055  | 0.00000  | 0.00137  | 0.00000  |
| 61 | C4 | DYY | -0.01171 | -0.00995 | 0.00000  | -0.00253 | 0.00000  |
| 62 | C4 | DZZ | 0.00098  | 0.00187  | 0.00000  | -0.00103 | 0.00000  |
| 63 | C4 | DXY | 0.01355  | 0.00369  | 0.00000  | 0.00137  | 0.00000  |
| 64 | C4 | DXZ | 0.00000  | 0.00000  | 0.00135  | 0.00000  | 0.00154  |
| 65 | C4 | DYZ | 0.00000  | 0.00000  | -0.00484 | 0.00000  | 0.00936  |
| 66 | C5 | S   | -0.01223 | 0.00577  | 0.00000  | -0.00035 | 0.00000  |
| 67 | C5 | S   | 0.02552  | -0.01204 | 0.00000  | -0.00481 | 0.00000  |
| 68 | C5 | PX  | 0.21234  | 0.11376  | 0.00000  | -0.08685 | 0.00000  |
| 69 | C5 | PY  | -0.01547 | 0.19828  | 0.00000  | 0.14101  | 0.00000  |
| 70 | C5 | PZ  | 0.00000  | 0.00000  | 0.10056  | 0.00000  | 0.07776  |
| 71 | C5 | S   | 0.05167  | -0.00920 | 0.00000  | 0.03710  | 0.00000  |
| 72 | C5 | PX  | 0.09896  | 0.03868  | 0.00000  | -0.04960 | 0.00000  |
| 73 | C5 | PY  | -0.03274 | 0.07049  | 0.00000  | 0.06010  | 0.00000  |
| 74 | C5 | PZ  | 0.00000  | 0.00000  | 0.06193  | 0.00000  | 0.05099  |
| 75 | C5 | DXX | 0.00747  | 0.01091  | 0.00000  | -0.00008 | 0.00000  |
| 76 | C5 | DYY | -0.00532 | -0.00714 | 0.00000  | 0.00365  | 0.00000  |



|     |    |     |          |          |          |          |          |
|-----|----|-----|----------|----------|----------|----------|----------|
| 77  | C5 | DZZ | -0.00037 | -0.00035 | 0.00000  | -0.00110 | 0.00000  |
| 78  | C5 | DXY | 0.00873  | -0.00294 | 0.00000  | -0.01280 | 0.00000  |
| 79  | C5 | DXZ | 0.00000  | 0.00000  | 0.00304  | 0.00000  | 0.00591  |
| 80  | C5 | DYZ | 0.00000  | 0.00000  | -0.00664 | 0.00000  | 0.00071  |
| 81  | C6 | S   | 0.02335  | 0.01064  | 0.00000  | -0.00294 | 0.00000  |
| 82  | C6 | S   | -0.05049 | -0.02494 | 0.00000  | 0.00055  | 0.00000  |
| 83  | C6 | PX  | -0.15797 | -0.06450 | 0.00000  | -0.06108 | 0.00000  |
| 84  | C6 | PY  | -0.06518 | 0.14022  | 0.00000  | 0.23011  | 0.00000  |
| 85  | C6 | PZ  | 0.00000  | 0.00000  | 0.23109  | 0.00000  | -0.09462 |
| 86  | C6 | S   | -0.02883 | -0.03142 | 0.00000  | 0.04742  | 0.00000  |
| 87  | C6 | PX  | -0.05509 | -0.02183 | 0.00000  | -0.02895 | 0.00000  |
| 88  | C6 | PY  | -0.03155 | 0.04223  | 0.00000  | 0.06963  | 0.00000  |
| 89  | C6 | PZ  | 0.00000  | 0.00000  | 0.13526  | 0.00000  | -0.05806 |
| 90  | C6 | DXX | -0.00140 | 0.00664  | 0.00000  | 0.01048  | 0.00000  |
| 91  | C6 | DYY | 0.00035  | -0.00543 | 0.00000  | -0.00745 | 0.00000  |
| 92  | C6 | DZZ | 0.00062  | 0.00102  | 0.00000  | 0.00183  | 0.00000  |
| 93  | C6 | DXY | -0.00547 | -0.01106 | 0.00000  | -0.00980 | 0.00000  |
| 94  | C6 | DXZ | 0.00000  | 0.00000  | 0.00405  | 0.00000  | -0.00217 |
| 95  | C6 | DYZ | 0.00000  | 0.00000  | -0.01115 | 0.00000  | 0.01007  |
| 96  | C7 | S   | 0.00216  | -0.00513 | 0.00000  | -0.00188 | 0.00000  |
| 97  | C7 | S   | -0.00176 | 0.01073  | 0.00000  | 0.00321  | 0.00000  |
| 98  | C7 | PX  | -0.23428 | -0.02754 | 0.00000  | 0.01257  | 0.00000  |
| 99  | C7 | PY  | 0.18743  | -0.14480 | 0.00000  | 0.10914  | 0.00000  |
| 100 | C7 | PZ  | 0.00000  | 0.00000  | 0.14676  | 0.00000  | -0.06559 |
| 101 | C7 | S   | -0.00762 | 0.03647  | 0.00000  | 0.02433  | 0.00000  |
| 102 | C7 | PX  | -0.11571 | -0.02435 | 0.00000  | 0.00151  | 0.00000  |
| 103 | C7 | PY  | 0.06761  | -0.04735 | 0.00000  | 0.03407  | 0.00000  |
| 104 | C7 | PZ  | 0.00000  | 0.00000  | 0.08504  | 0.00000  | -0.04196 |
| 105 | C7 | DXX | -0.01737 | 0.00436  | 0.00000  | 0.00107  | 0.00000  |
| 106 | C7 | DYY | 0.01502  | -0.00241 | 0.00000  | -0.00167 | 0.00000  |
| 107 | C7 | DZZ | 0.00103  | -0.00072 | 0.00000  | 0.00022  | 0.00000  |
| 108 | C7 | DXY | -0.00694 | 0.01202  | 0.00000  | -0.00697 | 0.00000  |
| 109 | C7 | DXZ | 0.00000  | 0.00000  | -0.01161 | 0.00000  | 0.00517  |
| 110 | C7 | DYZ | 0.00000  | 0.00000  | 0.00410  | 0.00000  | 0.00074  |
| 111 | O1 | S   | 0.00879  | -0.00154 | 0.00000  | 0.02192  | 0.00000  |
| 112 | O1 | S   | -0.01860 | 0.00361  | 0.00000  | -0.05224 | 0.00000  |
| 113 | O1 | PX  | 0.11260  | 0.04803  | 0.00000  | 0.14085  | 0.00000  |
| 114 | O1 | PY  | 0.07338  | 0.11186  | 0.00000  | -0.08666 | 0.00000  |
| 115 | O1 | PZ  | 0.00000  | 0.00000  | 0.03953  | 0.00000  | 0.32398  |
| 116 | O1 | S   | -0.04372 | 0.00352  | 0.00000  | -0.08718 | 0.00000  |
| 117 | O1 | PX  | 0.08256  | 0.03338  | 0.00000  | 0.10492  | 0.00000  |
| 118 | O1 | PY  | 0.05250  | 0.08318  | 0.00000  | -0.07372 | 0.00000  |
| 119 | O1 | PZ  | 0.00000  | 0.00000  | 0.02839  | 0.00000  | 0.25348  |
| 120 | O1 | DXX | 0.00974  | 0.00977  | 0.00000  | 0.00235  | 0.00000  |
| 121 | O1 | DYY | -0.00551 | -0.01150 | 0.00000  | 0.00695  | 0.00000  |
| 122 | O1 | DZZ | -0.00060 | 0.00071  | 0.00000  | -0.00493 | 0.00000  |
| 123 | O1 | DXY | 0.00348  | 0.00489  | 0.00000  | -0.00518 | 0.00000  |
| 124 | O1 | DXZ | 0.00000  | 0.00000  | -0.00157 | 0.00000  | 0.00353  |
| 125 | O1 | DYZ | 0.00000  | 0.00000  | -0.00479 | 0.00000  | -0.01659 |
| 126 | H4 | S   | -0.09283 | 0.03431  | 0.00000  | 0.11186  | 0.00000  |
| 127 | H4 | S   | -0.07059 | 0.02911  | 0.00000  | 0.08315  | 0.00000  |
| 128 | H4 | PX  | -0.00219 | 0.00292  | 0.00000  | 0.00326  | 0.00000  |
| 129 | H4 | PY  | 0.00433  | 0.00138  | 0.00000  | -0.00314 | 0.00000  |
| 130 | H4 | PZ  | 0.00000  | 0.00000  | 0.00189  | 0.00000  | 0.00180  |

|     |     |     |          |          |          |          |          |
|-----|-----|-----|----------|----------|----------|----------|----------|
| 131 | N1  | S   | -0.00766 | 0.00315  | 0.00000  | -0.02493 | 0.00000  |
| 132 | N1  | S   | 0.01924  | -0.00879 | 0.00000  | 0.05666  | 0.00000  |
| 133 | N1  | PX  | -0.10779 | 0.10458  | 0.00000  | 0.01363  | 0.00000  |
| 134 | N1  | PY  | 0.03147  | -0.13595 | 0.00000  | -0.25312 | 0.00000  |
| 135 | N1  | PZ  | 0.00000  | 0.00000  | 0.23856  | 0.00000  | -0.13762 |
| 136 | N1  | S   | 0.00387  | 0.01388  | 0.00000  | 0.09168  | 0.00000  |
| 137 | N1  | PX  | -0.06260 | 0.06300  | 0.00000  | -0.00413 | 0.00000  |
| 138 | N1  | PY  | 0.00436  | -0.06446 | 0.00000  | -0.13757 | 0.00000  |
| 139 | N1  | PZ  | 0.00000  | 0.00000  | 0.15075  | 0.00000  | -0.09338 |
| 140 | N1  | DXX | -0.00706 | 0.01522  | 0.00000  | 0.00864  | 0.00000  |
| 141 | N1  | DYY | 0.00540  | -0.01426 | 0.00000  | -0.01423 | 0.00000  |
| 142 | N1  | DZZ | 0.00191  | -0.00132 | 0.00000  | 0.00283  | 0.00000  |
| 143 | N1  | DXY | -0.00547 | -0.00407 | 0.00000  | -0.01431 | 0.00000  |
| 144 | N1  | DXZ | 0.00000  | 0.00000  | 0.01594  | 0.00000  | -0.00966 |
| 145 | N1  | DYZ | 0.00000  | 0.00000  | 0.01698  | 0.00000  | -0.00806 |
| 146 | H6  | S   | -0.00209 | 0.07041  | 0.00000  | -0.05128 | 0.00000  |
| 147 | H6  | S   | -0.00742 | 0.05763  | 0.00000  | -0.03642 | 0.00000  |
| 148 | H6  | PX  | 0.00007  | 0.00358  | 0.00000  | -0.00164 | 0.00000  |
| 149 | H6  | PY  | -0.00154 | -0.00158 | 0.00000  | -0.00276 | 0.00000  |
| 150 | H6  | PZ  | 0.00000  | 0.00000  | 0.00253  | 0.00000  | 0.00031  |
| 151 | C8  | S   | -0.00921 | -0.01004 | 0.00000  | 0.00733  | 0.00000  |
| 152 | C8  | S   | 0.01765  | 0.02352  | 0.00000  | -0.01555 | 0.00000  |
| 153 | C8  | PX  | 0.06034  | -0.06236 | 0.00000  | -0.13646 | 0.00000  |
| 154 | C8  | PY  | -0.08868 | 0.25146  | 0.00000  | 0.01034  | 0.00000  |
| 155 | C8  | PZ  | 0.00000  | 0.00000  | 0.17383  | 0.00000  | -0.11704 |
| 156 | C8  | S   | 0.00400  | 0.05138  | 0.00000  | -0.01885 | 0.00000  |
| 157 | C8  | PX  | 0.00683  | -0.00820 | 0.00000  | -0.08929 | 0.00000  |
| 158 | C8  | PY  | -0.02742 | 0.05587  | 0.00000  | -0.00779 | 0.00000  |
| 159 | C8  | PZ  | 0.00000  | 0.00000  | 0.10041  | 0.00000  | -0.07198 |
| 160 | C8  | DXX | -0.01127 | 0.01652  | 0.00000  | 0.01423  | 0.00000  |
| 161 | C8  | DYY | 0.00879  | -0.01064 | 0.00000  | -0.01385 | 0.00000  |
| 162 | C8  | DZZ | 0.00057  | -0.00183 | 0.00000  | -0.00099 | 0.00000  |
| 163 | C8  | DXY | -0.00184 | 0.00677  | 0.00000  | -0.00689 | 0.00000  |
| 164 | C8  | DXZ | 0.00000  | 0.00000  | -0.00511 | 0.00000  | 0.00305  |
| 165 | C8  | DYZ | 0.00000  | 0.00000  | 0.00415  | 0.00000  | -0.00065 |
| 166 | H8  | S   | -0.16984 | -0.00207 | 0.00000  | 0.00787  | 0.00000  |
| 167 | H8  | S   | -0.13204 | 0.00377  | 0.00000  | 0.01032  | 0.00000  |
| 168 | H8  | PX  | 0.00800  | 0.00038  | 0.00000  | -0.00005 | 0.00000  |
| 169 | H8  | PY  | 0.00219  | -0.00235 | 0.00000  | 0.00156  | 0.00000  |
| 170 | H8  | PZ  | 0.00000  | 0.00000  | 0.00307  | 0.00000  | -0.00135 |
| 171 | C10 | S   | -0.00731 | 0.01534  | 0.00000  | 0.00810  | 0.00000  |
| 172 | C10 | S   | 0.01532  | -0.03248 | 0.00000  | -0.01709 | 0.00000  |
| 173 | C10 | PX  | 0.07475  | 0.05110  | 0.00000  | 0.21538  | 0.00000  |
| 174 | C10 | PY  | 0.13040  | -0.22192 | 0.00000  | -0.00968 | 0.00000  |
| 175 | C10 | PZ  | 0.00000  | 0.00000  | 0.08709  | 0.00000  | -0.06724 |
| 176 | C10 | S   | 0.01645  | -0.04722 | 0.00000  | -0.02362 | 0.00000  |
| 177 | C10 | PX  | 0.03884  | 0.02205  | 0.00000  | 0.12001  | 0.00000  |
| 178 | C10 | PY  | 0.05516  | -0.09712 | 0.00000  | 0.01015  | 0.00000  |
| 179 | C10 | PZ  | 0.00000  | 0.00000  | 0.05071  | 0.00000  | -0.04299 |
| 180 | C10 | DXX | -0.00442 | 0.01177  | 0.00000  | 0.00880  | 0.00000  |
| 181 | C10 | DYY | 0.00208  | -0.00808 | 0.00000  | -0.00712 | 0.00000  |
| 182 | C10 | DZZ | 0.00006  | -0.00001 | 0.00000  | -0.00014 | 0.00000  |
| 183 | C10 | DXY | -0.00684 | 0.00441  | 0.00000  | -0.01439 | 0.00000  |
| 184 | C10 | DXZ | 0.00000  | 0.00000  | -0.00196 | 0.00000  | 0.00143  |

|     |     |     |          |          |          |          |          |
|-----|-----|-----|----------|----------|----------|----------|----------|
| 185 | C10 | DYZ | 0.00000  | 0.00000  | 0.00938  | 0.00000  | -0.00665 |
| 186 | H16 | S   | 0.02297  | 0.06613  | 0.00000  | 0.13848  | 0.00000  |
| 187 | H16 | S   | 0.01098  | 0.05923  | 0.00000  | 0.11797  | 0.00000  |
| 188 | H16 | PX  | -0.00113 | -0.00304 | 0.00000  | -0.00550 | 0.00000  |
| 189 | H16 | PY  | 0.00216  | -0.00201 | 0.00000  | 0.00232  | 0.00000  |
| 190 | H16 | PZ  | 0.00000  | 0.00000  | 0.00185  | 0.00000  | -0.00143 |
| 191 | H18 | S   | -0.08520 | 0.05870  | 0.00000  | -0.11287 | 0.00000  |
| 192 | H18 | S   | -0.06447 | 0.05088  | 0.00000  | -0.07810 | 0.00000  |
| 193 | H18 | PX  | -0.00358 | 0.00333  | 0.00000  | -0.00349 | 0.00000  |
| 194 | H18 | PY  | -0.00177 | -0.00084 | 0.00000  | -0.00420 | 0.00000  |
| 195 | H18 | PZ  | 0.00000  | 0.00000  | 0.00190  | 0.00000  | -0.00146 |
| 196 | C9  | S   | -0.00163 | -0.00289 | 0.00000  | -0.00125 | 0.00000  |
| 197 | C9  | S   | 0.00514  | 0.00473  | 0.00000  | 0.00553  | 0.00000  |
| 198 | C9  | PX  | -0.05583 | 0.02765  | 0.00000  | -0.12200 | 0.00000  |
| 199 | C9  | PY  | -0.10152 | -0.21429 | 0.00000  | 0.13169  | 0.00000  |
| 200 | C9  | PZ  | 0.00000  | 0.00000  | -0.12387 | 0.00000  | -0.28302 |
| 201 | C9  | S   | -0.01335 | -0.00125 | 0.00000  | -0.00775 | 0.00000  |
| 202 | C9  | PX  | -0.01244 | 0.02102  | 0.00000  | -0.04919 | 0.00000  |
| 203 | C9  | PY  | -0.04501 | -0.10844 | 0.00000  | 0.07342  | 0.00000  |
| 204 | C9  | PZ  | 0.00000  | 0.00000  | -0.05825 | 0.00000  | -0.13154 |
| 205 | C9  | DXX | 0.00860  | 0.01085  | 0.00000  | -0.00302 | 0.00000  |
| 206 | C9  | DYY | -0.00613 | -0.01752 | 0.00000  | 0.01614  | 0.00000  |
| 207 | C9  | DZZ | -0.00138 | 0.00623  | 0.00000  | -0.01088 | 0.00000  |
| 208 | C9  | DXY | 0.00673  | 0.00480  | 0.00000  | 0.00516  | 0.00000  |
| 209 | C9  | DXZ | 0.00000  | 0.00000  | -0.00906 | 0.00000  | -0.03027 |
| 210 | C9  | DYZ | 0.00000  | 0.00000  | 0.00305  | 0.00000  | 0.00408  |
| 211 | H3  | S   | -0.05990 | -0.14589 | 0.00000  | 0.10972  | 0.00000  |
| 212 | H3  | S   | -0.04805 | -0.11726 | 0.00000  | 0.09249  | 0.00000  |
| 213 | H3  | PX  | -0.00132 | -0.00122 | 0.00000  | -0.00016 | 0.00000  |
| 214 | H3  | PY  | 0.00236  | 0.00591  | 0.00000  | -0.00457 | 0.00000  |
| 215 | H3  | PZ  | 0.00000  | 0.00000  | -0.00206 | 0.00000  | -0.00492 |
| 216 | H5  | S   | -0.00023 | 0.04886  | 0.06856  | -0.06616 | 0.17248  |
| 217 | H5  | S   | -0.00051 | 0.04198  | 0.05712  | -0.06193 | 0.16182  |
| 218 | H5  | PX  | -0.00075 | -0.00106 | -0.00214 | 0.00016  | -0.00480 |
| 219 | H5  | PY  | -0.00149 | -0.00217 | 0.00136  | 0.00078  | 0.00324  |
| 220 | H5  | PZ  | 0.00005  | 0.00290  | 0.00190  | -0.00375 | 0.00457  |
| 221 | H7  | S   | -0.00023 | 0.04886  | -0.06856 | -0.06616 | -0.17248 |
| 222 | H7  | S   | -0.00051 | 0.04198  | -0.05712 | -0.06193 | -0.16182 |
| 223 | H7  | PX  | -0.00075 | -0.00106 | 0.00214  | 0.00016  | 0.00480  |
| 224 | H7  | PY  | -0.00149 | -0.00217 | -0.00136 | 0.00078  | -0.00324 |
| 225 | H7  | PZ  | -0.00005 | -0.00290 | 0.00190  | 0.00375  | 0.00457  |

|              |           |           |           |           |           |
|--------------|-----------|-----------|-----------|-----------|-----------|
| MO:          | 36        | 37        | 38        | 39        | 40        |
| Eigenvalues: | -0.50639  | -0.49379  | -0.42839  | -0.41333  | -0.39930  |
| (ev):        | -13.77952 | -13.43683 | -11.65714 | -11.24742 | -10.86560 |

|   |    |    |          |          |          |          |          |
|---|----|----|----------|----------|----------|----------|----------|
|   |    | A  | A        | A        | A        | A        |          |
| 1 | H1 | S  | -0.02589 | -0.11153 | 0.00000  | 0.06460  | 0.00000  |
| 2 | H1 | S  | -0.03694 | -0.09881 | 0.00000  | 0.06995  | 0.00000  |
| 3 | H1 | PX | 0.00198  | 0.00337  | 0.00000  | -0.00208 | 0.00000  |
| 4 | H1 | PY | -0.00312 | 0.00209  | 0.00000  | -0.00037 | 0.00000  |
| 5 | H1 | PZ | 0.00000  | 0.00000  | -0.00331 | 0.00000  | -0.00580 |
| 6 | C1 | S  | -0.00310 | -0.01853 | 0.00000  | 0.00878  | 0.00000  |
| 7 | C1 | S  | 0.00972  | 0.03815  | 0.00000  | -0.01944 | 0.00000  |

|    |    |     |          |          |          |          |          |
|----|----|-----|----------|----------|----------|----------|----------|
| 8  | C1 | PX  | 0.04148  | -0.18460 | 0.00000  | 0.07912  | 0.00000  |
| 9  | C1 | PY  | -0.21580 | -0.01188 | 0.00000  | 0.04487  | 0.00000  |
| 10 | C1 | PZ  | 0.00000  | 0.00000  | -0.13795 | 0.00000  | -0.23812 |
| 11 | C1 | S   | -0.01783 | 0.06703  | 0.00000  | -0.05137 | 0.00000  |
| 12 | C1 | PX  | 0.02876  | -0.11732 | 0.00000  | 0.04597  | 0.00000  |
| 13 | C1 | PY  | -0.06753 | -0.02635 | 0.00000  | 0.05947  | 0.00000  |
| 14 | C1 | PZ  | 0.00000  | 0.00000  | -0.10950 | 0.00000  | -0.18530 |
| 15 | C1 | DXX | -0.00763 | -0.01040 | 0.00000  | 0.00658  | 0.00000  |
| 16 | C1 | DYY | 0.00996  | 0.00798  | 0.00000  | -0.00712 | 0.00000  |
| 17 | C1 | DZZ | -0.00059 | -0.00034 | 0.00000  | -0.00024 | 0.00000  |
| 18 | C1 | DXY | 0.00549  | -0.01021 | 0.00000  | 0.00841  | 0.00000  |
| 19 | C1 | DXZ | 0.00000  | 0.00000  | 0.00830  | 0.00000  | 0.00889  |
| 20 | C1 | DYZ | 0.00000  | 0.00000  | -0.00166 | 0.00000  | 0.00446  |
| 21 | C2 | S   | -0.00056 | -0.00202 | 0.00000  | 0.01898  | 0.00000  |
| 22 | C2 | S   | 0.00414  | 0.00590  | 0.00000  | -0.03822 | 0.00000  |
| 23 | C2 | PX  | 0.04536  | 0.18199  | 0.00000  | -0.11150 | 0.00000  |
| 24 | C2 | PY  | 0.00123  | 0.00542  | 0.00000  | 0.07809  | 0.00000  |
| 25 | C2 | PZ  | 0.00000  | 0.00000  | -0.22060 | 0.00000  | 0.19298  |
| 26 | C2 | S   | -0.00963 | 0.01018  | 0.00000  | -0.10901 | 0.00000  |
| 27 | C2 | PX  | 0.01685  | 0.12395  | 0.00000  | -0.06783 | 0.00000  |
| 28 | C2 | PY  | -0.00483 | 0.00585  | 0.00000  | 0.02450  | 0.00000  |
| 29 | C2 | PZ  | 0.00000  | 0.00000  | -0.16704 | 0.00000  | 0.14320  |
| 30 | C2 | DXX | -0.00368 | -0.01093 | 0.00000  | 0.00546  | 0.00000  |
| 31 | C2 | DYY | 0.00289  | 0.01039  | 0.00000  | -0.00616 | 0.00000  |
| 32 | C2 | DZZ | 0.00058  | 0.00001  | 0.00000  | 0.00068  | 0.00000  |
| 33 | C2 | DXY | -0.00124 | -0.01475 | 0.00000  | 0.00892  | 0.00000  |
| 34 | C2 | DXZ | 0.00000  | 0.00000  | -0.00846 | 0.00000  | 0.00697  |
| 35 | C2 | DYZ | 0.00000  | 0.00000  | -0.01369 | 0.00000  | 0.00447  |
| 36 | C3 | S   | -0.00120 | -0.00233 | 0.00000  | -0.02013 | 0.00000  |
| 37 | C3 | S   | 0.00119  | 0.00448  | 0.00000  | 0.04055  | 0.00000  |
| 38 | C3 | PX  | 0.07399  | 0.14134  | 0.00000  | -0.21264 | 0.00000  |
| 39 | C3 | PY  | 0.19322  | 0.03215  | 0.00000  | -0.05395 | 0.00000  |
| 40 | C3 | PZ  | 0.00000  | 0.00000  | -0.05267 | 0.00000  | -0.24781 |
| 41 | C3 | S   | 0.01587  | -0.03082 | 0.00000  | 0.11885  | 0.00000  |
| 42 | C3 | PX  | 0.05592  | 0.06233  | 0.00000  | -0.11493 | 0.00000  |
| 43 | C3 | PY  | 0.08986  | 0.02228  | 0.00000  | 0.02323  | 0.00000  |
| 44 | C3 | PZ  | 0.00000  | 0.00000  | -0.04530 | 0.00000  | -0.18030 |
| 45 | C3 | DXX | -0.01285 | -0.01426 | 0.00000  | 0.00758  | 0.00000  |
| 46 | C3 | DYY | 0.01406  | 0.01336  | 0.00000  | -0.00457 | 0.00000  |
| 47 | C3 | DZZ | -0.00018 | 0.00046  | 0.00000  | -0.00023 | 0.00000  |
| 48 | C3 | DXY | 0.00571  | -0.01227 | 0.00000  | 0.00546  | 0.00000  |
| 49 | C3 | DXZ | 0.00000  | 0.00000  | 0.00284  | 0.00000  | -0.01220 |
| 50 | C3 | DYZ | 0.00000  | 0.00000  | -0.00780 | 0.00000  | 0.00127  |
| 51 | C4 | S   | -0.00087 | 0.01738  | 0.00000  | 0.00147  | 0.00000  |
| 52 | C4 | S   | 0.00270  | -0.03919 | 0.00000  | -0.00227 | 0.00000  |
| 53 | C4 | PX  | -0.07401 | 0.20849  | 0.00000  | -0.06244 | 0.00000  |
| 54 | C4 | PY  | 0.15577  | -0.03219 | 0.00000  | 0.01568  | 0.00000  |
| 55 | C4 | PZ  | 0.00000  | 0.00000  | -0.10133 | 0.00000  | -0.09542 |
| 56 | C4 | S   | -0.02465 | -0.05831 | 0.00000  | -0.02101 | 0.00000  |
| 57 | C4 | PX  | -0.00572 | 0.07100  | 0.00000  | -0.03715 | 0.00000  |
| 58 | C4 | PY  | 0.00113  | 0.02807  | 0.00000  | -0.00014 | 0.00000  |
| 59 | C4 | PZ  | 0.00000  | 0.00000  | -0.06501 | 0.00000  | -0.06861 |
| 60 | C4 | DXX | -0.00849 | -0.01052 | 0.00000  | 0.00309  | 0.00000  |
| 61 | C4 | DYY | 0.01304  | 0.00871  | 0.00000  | -0.00317 | 0.00000  |

|     |    |     |          |          |          |          |          |
|-----|----|-----|----------|----------|----------|----------|----------|
| 62  | C4 | DZZ | -0.00307 | 0.00099  | 0.00000  | -0.00002 | 0.00000  |
| 63  | C4 | DXY | 0.01691  | -0.01861 | 0.00000  | 0.00470  | 0.00000  |
| 64  | C4 | DXZ | 0.00000  | 0.00000  | 0.00196  | 0.00000  | -0.01495 |
| 65  | C4 | DYZ | 0.00000  | 0.00000  | 0.02356  | 0.00000  | 0.01326  |
| 66  | C5 | S   | -0.01104 | 0.00529  | 0.00000  | -0.00507 | 0.00000  |
| 67  | C5 | S   | 0.02223  | -0.01290 | 0.00000  | 0.00676  | 0.00000  |
| 68  | C5 | PX  | 0.02062  | -0.20312 | 0.00000  | 0.04669  | 0.00000  |
| 69  | C5 | PY  | -0.00461 | -0.02000 | 0.00000  | -0.02053 | 0.00000  |
| 70  | C5 | PZ  | 0.00000  | 0.00000  | -0.23534 | 0.00000  | 0.13043  |
| 71  | C5 | S   | 0.05499  | -0.03530 | 0.00000  | 0.04164  | 0.00000  |
| 72  | C5 | PX  | -0.00060 | -0.10627 | 0.00000  | 0.03840  | 0.00000  |
| 73  | C5 | PY  | 0.00380  | 0.00580  | 0.00000  | -0.04131 | 0.00000  |
| 74  | C5 | PZ  | 0.00000  | 0.00000  | -0.17241 | 0.00000  | 0.10373  |
| 75  | C5 | DXX | -0.00091 | -0.00966 | 0.00000  | 0.00221  | 0.00000  |
| 76  | C5 | DYY | 0.00210  | 0.00857  | 0.00000  | -0.00226 | 0.00000  |
| 77  | C5 | DZZ | -0.00043 | -0.00012 | 0.00000  | -0.00109 | 0.00000  |
| 78  | C5 | DXY | 0.00308  | -0.01677 | 0.00000  | 0.00776  | 0.00000  |
| 79  | C5 | DXZ | 0.00000  | 0.00000  | -0.00291 | 0.00000  | -0.00509 |
| 80  | C5 | DYZ | 0.00000  | 0.00000  | 0.01519  | 0.00000  | -0.01151 |
| 81  | C6 | S   | 0.00920  | 0.01605  | 0.00000  | 0.01984  | 0.00000  |
| 82  | C6 | S   | -0.01972 | -0.03737 | 0.00000  | -0.05634 | 0.00000  |
| 83  | C6 | PX  | -0.11097 | -0.21494 | 0.00000  | 0.16778  | 0.00000  |
| 84  | C6 | PY  | -0.05438 | 0.05338  | 0.00000  | 0.09514  | 0.00000  |
| 85  | C6 | PZ  | 0.00000  | 0.00000  | -0.04713 | 0.00000  | 0.15686  |
| 86  | C6 | S   | -0.02215 | -0.03596 | 0.00000  | 0.03956  | 0.00000  |
| 87  | C6 | PX  | -0.04009 | -0.09489 | 0.00000  | 0.06261  | 0.00000  |
| 88  | C6 | PY  | -0.01190 | -0.01770 | 0.00000  | -0.02026 | 0.00000  |
| 89  | C6 | PZ  | 0.00000  | 0.00000  | -0.02859 | 0.00000  | 0.11016  |
| 90  | C6 | DXX | -0.00768 | -0.00440 | 0.00000  | 0.01137  | 0.00000  |
| 91  | C6 | DYY | 0.00690  | 0.00360  | 0.00000  | -0.01043 | 0.00000  |
| 92  | C6 | DZZ | -0.00065 | 0.00084  | 0.00000  | 0.00181  | 0.00000  |
| 93  | C6 | DXY | -0.00172 | -0.00280 | 0.00000  | 0.03310  | 0.00000  |
| 94  | C6 | DXZ | 0.00000  | 0.00000  | 0.00412  | 0.00000  | -0.01541 |
| 95  | C6 | DYZ | 0.00000  | 0.00000  | -0.01423 | 0.00000  | -0.01149 |
| 96  | C7 | S   | -0.00043 | -0.02306 | 0.00000  | -0.01279 | 0.00000  |
| 97  | C7 | S   | 0.00540  | 0.05016  | 0.00000  | 0.02577  | 0.00000  |
| 98  | C7 | PX  | -0.09658 | -0.18438 | 0.00000  | -0.06143 | 0.00000  |
| 99  | C7 | PY  | -0.15961 | -0.02947 | 0.00000  | -0.14457 | 0.00000  |
| 100 | C7 | PZ  | 0.00000  | 0.00000  | 0.04953  | 0.00000  | -0.21888 |
| 101 | C7 | S   | -0.00514 | 0.09121  | 0.00000  | 0.09684  | 0.00000  |
| 102 | C7 | PX  | -0.05858 | -0.10228 | 0.00000  | -0.03381 | 0.00000  |
| 103 | C7 | PY  | -0.06707 | -0.01611 | 0.00000  | -0.09782 | 0.00000  |
| 104 | C7 | PZ  | 0.00000  | 0.00000  | 0.03997  | 0.00000  | -0.17271 |
| 105 | C7 | DXX | -0.00628 | -0.01194 | 0.00000  | 0.00280  | 0.00000  |
| 106 | C7 | DYY | 0.00655  | 0.01070  | 0.00000  | 0.00053  | 0.00000  |
| 107 | C7 | DZZ | 0.00038  | -0.00009 | 0.00000  | 0.00025  | 0.00000  |
| 108 | C7 | DXY | 0.01496  | 0.00761  | 0.00000  | 0.00143  | 0.00000  |
| 109 | C7 | DXZ | 0.00000  | 0.00000  | -0.00362 | 0.00000  | 0.01005  |
| 110 | C7 | DYZ | 0.00000  | 0.00000  | -0.00734 | 0.00000  | -0.01124 |
| 111 | O1 | S   | 0.02868  | -0.02215 | 0.00000  | 0.00250  | 0.00000  |
| 112 | O1 | S   | -0.07026 | 0.05219  | 0.00000  | -0.00685 | 0.00000  |
| 113 | O1 | PX  | 0.27489  | -0.18061 | 0.00000  | 0.01936  | 0.00000  |
| 114 | O1 | PY  | -0.22849 | 0.03889  | 0.00000  | -0.00249 | 0.00000  |
| 115 | O1 | PZ  | 0.00000  | 0.00000  | 0.29100  | 0.00000  | 0.11367  |

|     |    |     |          |          |          |          |          |
|-----|----|-----|----------|----------|----------|----------|----------|
| 116 | O1 | S   | -0.10269 | 0.08847  | 0.00000  | -0.00686 | 0.00000  |
| 117 | O1 | PX  | 0.21289  | -0.13929 | 0.00000  | 0.01551  | 0.00000  |
| 118 | O1 | PY  | -0.18687 | 0.04229  | 0.00000  | -0.00741 | 0.00000  |
| 119 | O1 | PZ  | 0.00000  | 0.00000  | 0.24980  | 0.00000  | 0.10141  |
| 120 | O1 | DXX | 0.00581  | -0.00785 | 0.00000  | 0.00042  | 0.00000  |
| 121 | O1 | DYY | 0.00904  | -0.00239 | 0.00000  | 0.00057  | 0.00000  |
| 122 | O1 | DZZ | -0.00909 | 0.00448  | 0.00000  | -0.00092 | 0.00000  |
| 123 | O1 | DXY | -0.00832 | -0.00194 | 0.00000  | 0.00128  | 0.00000  |
| 124 | O1 | DXZ | 0.00000  | 0.00000  | 0.00746  | 0.00000  | 0.00246  |
| 125 | O1 | DYZ | 0.00000  | 0.00000  | -0.00584 | 0.00000  | -0.00052 |
| 126 | H4 | S   | -0.00602 | 0.09612  | 0.00000  | -0.03681 | 0.00000  |
| 127 | H4 | S   | -0.03225 | 0.09644  | 0.00000  | -0.03133 | 0.00000  |
| 128 | H4 | PX  | -0.00083 | 0.00188  | 0.00000  | -0.00052 | 0.00000  |
| 129 | H4 | PY  | -0.00069 | -0.00343 | 0.00000  | 0.00073  | 0.00000  |
| 130 | H4 | PZ  | 0.00000  | 0.00000  | -0.00467 | 0.00000  | 0.00299  |
| 131 | N1 | S   | 0.00764  | -0.02227 | 0.00000  | -0.06294 | 0.00000  |
| 132 | N1 | S   | -0.01804 | 0.04936  | 0.00000  | 0.13584  | 0.00000  |
| 133 | N1 | PX  | -0.01908 | -0.16375 | 0.00000  | -0.40913 | 0.00000  |
| 134 | N1 | PY  | 0.08491  | -0.05837 | 0.00000  | -0.22161 | 0.00000  |
| 135 | N1 | PZ  | 0.00000  | 0.00000  | 0.09663  | 0.00000  | 0.21210  |
| 136 | N1 | S   | -0.01938 | 0.07957  | 0.00000  | 0.24386  | 0.00000  |
| 137 | N1 | PX  | -0.00211 | -0.10387 | 0.00000  | -0.32214 | 0.00000  |
| 138 | N1 | PY  | 0.04379  | -0.05054 | 0.00000  | -0.18013 | 0.00000  |
| 139 | N1 | PZ  | 0.00000  | 0.00000  | 0.07260  | 0.00000  | 0.17022  |
| 140 | N1 | DXX | -0.00060 | -0.00620 | 0.00000  | -0.02185 | 0.00000  |
| 141 | N1 | DYY | 0.00160  | -0.00242 | 0.00000  | -0.00646 | 0.00000  |
| 142 | N1 | DZZ | -0.00089 | 0.00379  | 0.00000  | 0.01056  | 0.00000  |
| 143 | N1 | DXY | 0.00234  | -0.01035 | 0.00000  | -0.00989 | 0.00000  |
| 144 | N1 | DXZ | 0.00000  | 0.00000  | 0.01029  | 0.00000  | 0.00820  |
| 145 | N1 | DYZ | 0.00000  | 0.00000  | -0.00135 | 0.00000  | 0.01531  |
| 146 | H6 | S   | -0.03105 | -0.12763 | 0.00000  | 0.04963  | 0.00000  |
| 147 | H6 | S   | -0.02997 | -0.09725 | 0.00000  | 0.07588  | 0.00000  |
| 148 | H6 | PX  | -0.00118 | -0.00428 | 0.00000  | 0.00145  | 0.00000  |
| 149 | H6 | PY  | -0.00073 | -0.00252 | 0.00000  | 0.00113  | 0.00000  |
| 150 | H6 | PZ  | 0.00000  | 0.00000  | -0.00447 | 0.00000  | 0.00441  |
| 151 | C8 | S   | -0.02017 | -0.00814 | 0.00000  | 0.02728  | 0.00000  |
| 152 | C8 | S   | 0.04202  | 0.01508  | 0.00000  | -0.06687 | 0.00000  |
| 153 | C8 | PX  | 0.10740  | 0.10309  | 0.00000  | 0.18952  | 0.00000  |
| 154 | C8 | PY  | 0.14664  | 0.09950  | 0.00000  | 0.00175  | 0.00000  |
| 155 | C8 | PZ  | 0.00000  | 0.00000  | 0.20478  | 0.00000  | -0.01817 |
| 156 | C8 | S   | 0.06965  | 0.04263  | 0.00000  | -0.05179 | 0.00000  |
| 157 | C8 | PX  | 0.07069  | 0.04120  | 0.00000  | 0.02986  | 0.00000  |
| 158 | C8 | PY  | 0.05245  | 0.00741  | 0.00000  | -0.02319 | 0.00000  |
| 159 | C8 | PZ  | 0.00000  | 0.00000  | 0.14212  | 0.00000  | -0.00699 |
| 160 | C8 | DXX | -0.00133 | -0.00062 | 0.00000  | 0.00252  | 0.00000  |
| 161 | C8 | DYY | 0.00291  | -0.00013 | 0.00000  | -0.00712 | 0.00000  |
| 162 | C8 | DZZ | -0.00032 | 0.00060  | 0.00000  | 0.00183  | 0.00000  |
| 163 | C8 | DXY | 0.01244  | 0.01602  | 0.00000  | 0.02389  | 0.00000  |
| 164 | C8 | DXZ | 0.00000  | 0.00000  | -0.00024 | 0.00000  | -0.01443 |
| 165 | C8 | DYZ | 0.00000  | 0.00000  | -0.00719 | 0.00000  | -0.00194 |
| 166 | H8 | S   | -0.06280 | -0.10831 | 0.00000  | -0.01887 | 0.00000  |
| 167 | H8 | S   | -0.05322 | -0.10528 | 0.00000  | -0.02476 | 0.00000  |
| 168 | H8 | PX  | 0.00231  | 0.00400  | 0.00000  | 0.00144  | 0.00000  |
| 169 | H8 | PY  | -0.00238 | -0.00103 | 0.00000  | -0.00251 | 0.00000  |

|     |     |     |          |          |          |          |          |
|-----|-----|-----|----------|----------|----------|----------|----------|
| 170 | H8  | PZ  | 0.00000  | 0.00000  | 0.00101  | 0.00000  | -0.00511 |
| 171 | C10 | S   | 0.00692  | 0.00711  | 0.00000  | 0.00836  | 0.00000  |
| 172 | C10 | S   | -0.01491 | -0.01490 | 0.00000  | -0.01930 | 0.00000  |
| 173 | C10 | PX  | -0.09582 | -0.02588 | 0.00000  | -0.01723 | 0.00000  |
| 174 | C10 | PY  | -0.10031 | -0.06729 | 0.00000  | -0.02924 | 0.00000  |
| 175 | C10 | PZ  | 0.00000  | 0.00000  | 0.16060  | 0.00000  | -0.01725 |
| 176 | C10 | S   | -0.01748 | -0.04217 | 0.00000  | -0.05445 | 0.00000  |
| 177 | C10 | PX  | -0.06122 | -0.01516 | 0.00000  | -0.00022 | 0.00000  |
| 178 | C10 | PY  | -0.05487 | -0.03967 | 0.00000  | -0.00078 | 0.00000  |
| 179 | C10 | PZ  | 0.00000  | 0.00000  | 0.12153  | 0.00000  | -0.01554 |
| 180 | C10 | DXX | -0.00052 | 0.00028  | 0.00000  | -0.00165 | 0.00000  |
| 181 | C10 | DYY | 0.00151  | 0.00059  | 0.00000  | 0.00329  | 0.00000  |
| 182 | C10 | DZZ | 0.00030  | 0.00018  | 0.00000  | -0.00045 | 0.00000  |
| 183 | C10 | DXY | 0.01215  | 0.00705  | 0.00000  | 0.00837  | 0.00000  |
| 184 | C10 | DXZ | 0.00000  | 0.00000  | -0.00259 | 0.00000  | -0.00119 |
| 185 | C10 | DYZ | 0.00000  | 0.00000  | 0.01315  | 0.00000  | -0.00168 |
| 186 | H16 | S   | -0.05338 | -0.01414 | 0.00000  | -0.02113 | 0.00000  |
| 187 | H16 | S   | -0.04549 | -0.01374 | 0.00000  | -0.01911 | 0.00000  |
| 188 | H16 | PX  | 0.00184  | 0.00001  | 0.00000  | -0.00002 | 0.00000  |
| 189 | H16 | PY  | -0.00241 | -0.00121 | 0.00000  | -0.00032 | 0.00000  |
| 190 | H16 | PZ  | 0.00000  | 0.00000  | 0.00354  | 0.00000  | -0.00059 |
| 191 | H18 | S   | 0.09160  | 0.04198  | 0.00000  | 0.02638  | 0.00000  |
| 192 | H18 | S   | 0.07419  | 0.04471  | 0.00000  | 0.06381  | 0.00000  |
| 193 | H18 | PX  | 0.00330  | 0.00121  | 0.00000  | -0.00015 | 0.00000  |
| 194 | H18 | PY  | 0.00162  | 0.00068  | 0.00000  | 0.00120  | 0.00000  |
| 195 | H18 | PZ  | 0.00000  | 0.00000  | 0.00347  | 0.00000  | -0.00008 |
| 196 | C9  | S   | -0.00985 | 0.00514  | 0.00000  | 0.00052  | 0.00000  |
| 197 | C9  | S   | 0.02521  | -0.01368 | 0.00000  | -0.00037 | 0.00000  |
| 198 | C9  | PX  | -0.15200 | 0.12712  | 0.00000  | -0.02082 | 0.00000  |
| 199 | C9  | PY  | 0.11852  | -0.02805 | 0.00000  | 0.00633  | 0.00000  |
| 200 | C9  | PZ  | 0.00000  | 0.00000  | -0.08512 | 0.00000  | -0.01142 |
| 201 | C9  | S   | 0.00800  | 0.00112  | 0.00000  | -0.00306 | 0.00000  |
| 202 | C9  | PX  | -0.05535 | 0.04860  | 0.00000  | -0.01054 | 0.00000  |
| 203 | C9  | PY  | 0.07529  | -0.01766 | 0.00000  | 0.00356  | 0.00000  |
| 204 | C9  | PZ  | 0.00000  | 0.00000  | -0.02852 | 0.00000  | 0.00720  |
| 205 | C9  | DXX | -0.00461 | -0.00236 | 0.00000  | 0.00036  | 0.00000  |
| 206 | C9  | DYY | 0.02049  | -0.00804 | 0.00000  | 0.00164  | 0.00000  |
| 207 | C9  | DZZ | -0.01288 | 0.00876  | 0.00000  | -0.00145 | 0.00000  |
| 208 | C9  | DXY | 0.01160  | -0.00791 | 0.00000  | 0.00062  | 0.00000  |
| 209 | C9  | DXZ | 0.00000  | 0.00000  | -0.01782 | 0.00000  | -0.00573 |
| 210 | C9  | DYZ | 0.00000  | 0.00000  | -0.00080 | 0.00000  | -0.00043 |
| 211 | H3  | S   | 0.11986  | -0.04371 | 0.00000  | 0.00787  | 0.00000  |
| 212 | H3  | S   | 0.10113  | -0.03898 | 0.00000  | 0.00798  | 0.00000  |
| 213 | H3  | PX  | -0.00020 | 0.00103  | 0.00000  | -0.00024 | 0.00000  |
| 214 | H3  | PY  | -0.00519 | 0.00206  | 0.00000  | -0.00025 | 0.00000  |
| 215 | H3  | PZ  | 0.00000  | 0.00000  | -0.00170 | 0.00000  | -0.00032 |
| 216 | H5  | S   | -0.07307 | 0.04665  | 0.06815  | -0.00830 | 0.01620  |
| 217 | H5  | S   | -0.07698 | 0.04645  | 0.08774  | -0.00746 | 0.03569  |
| 218 | H5  | PX  | -0.00059 | 0.00051  | -0.00141 | 0.00004  | -0.00044 |
| 219 | H5  | PY  | 0.00095  | 0.00052  | 0.00096  | -0.00035 | -0.00020 |
| 220 | H5  | PZ  | -0.00381 | 0.00252  | 0.00165  | -0.00046 | 0.00044  |
| 221 | H7  | S   | -0.07307 | 0.04665  | -0.06815 | -0.00830 | -0.01620 |
| 222 | H7  | S   | -0.07698 | 0.04645  | -0.08774 | -0.00746 | -0.03569 |
| 223 | H7  | PX  | -0.00059 | 0.00051  | 0.00141  | 0.00004  | 0.00044  |

|     |    |    |         |          |          |          |         |
|-----|----|----|---------|----------|----------|----------|---------|
| 224 | H7 | PY | 0.00095 | 0.00052  | -0.00096 | -0.00035 | 0.00020 |
| 225 | H7 | PZ | 0.00381 | -0.00252 | 0.00165  | 0.00046  | 0.00044 |

|              |  |          |          |         |         |         |
|--------------|--|----------|----------|---------|---------|---------|
| MO:          |  | 41       | 42       | 43      | 44      | 45      |
| Eigenvalues: |  | -0.32668 | -0.28259 | 0.04162 | 0.17416 | 0.20872 |
| (ev):        |  | -8.88935 | -7.68968 | 1.13250 | 4.73911 | 5.67969 |

|    |    | A   | A        | A        | A        | A        |
|----|----|-----|----------|----------|----------|----------|
| 1  | H1 | S   | 0.00000  | 0.00000  | 0.00000  | 0.00000  |
| 2  | H1 | S   | 0.00000  | 0.00000  | 0.00000  | 0.00000  |
| 3  | H1 | PX  | 0.00000  | 0.00000  | 0.00000  | 0.00000  |
| 4  | H1 | PY  | 0.00000  | 0.00000  | 0.00000  | 0.00000  |
| 5  | H1 | PZ  | 0.00027  | -0.00692 | 0.00366  | 0.01010  |
| 6  | C1 | S   | 0.00000  | 0.00000  | 0.00000  | 0.00000  |
| 7  | C1 | S   | 0.00000  | 0.00000  | 0.00000  | 0.00000  |
| 8  | C1 | PX  | 0.00000  | 0.00000  | 0.00000  | 0.00000  |
| 9  | C1 | PY  | 0.00000  | 0.00000  | 0.00000  | 0.00000  |
| 10 | C1 | PZ  | 0.00513  | -0.26612 | 0.11129  | 0.21402  |
| 11 | C1 | S   | 0.00000  | 0.00000  | 0.00000  | 0.00000  |
| 12 | C1 | PX  | 0.00000  | 0.00000  | 0.00000  | 0.00000  |
| 13 | C1 | PY  | 0.00000  | 0.00000  | 0.00000  | 0.00000  |
| 14 | C1 | PZ  | -0.00684 | -0.25860 | 0.15890  | 0.42522  |
| 15 | C1 | DXX | 0.00000  | 0.00000  | 0.00000  | 0.00000  |
| 16 | C1 | DYY | 0.00000  | 0.00000  | 0.00000  | 0.00000  |
| 17 | C1 | DZZ | 0.00000  | 0.00000  | 0.00000  | 0.00000  |
| 18 | C1 | DXY | 0.00000  | 0.00000  | 0.00000  | 0.00000  |
| 19 | C1 | DXZ | 0.00263  | 0.01395  | 0.00334  | 0.00782  |
| 20 | C1 | DYZ | -0.00741 | -0.01552 | -0.01204 | 0.01153  |
| 21 | C2 | S   | 0.00000  | 0.00000  | 0.00000  | 0.00000  |
| 22 | C2 | S   | 0.00000  | 0.00000  | 0.00000  | 0.00000  |
| 23 | C2 | PX  | 0.00000  | 0.00000  | 0.00000  | 0.00000  |
| 24 | C2 | PY  | 0.00000  | 0.00000  | 0.00000  | 0.00000  |
| 25 | C2 | PZ  | -0.11942 | 0.17099  | 0.14818  | 0.29353  |
| 26 | C2 | S   | 0.00000  | 0.00000  | 0.00000  | 0.00000  |
| 27 | C2 | PX  | 0.00000  | 0.00000  | 0.00000  | 0.00000  |
| 28 | C2 | PY  | 0.00000  | 0.00000  | 0.00000  | 0.00000  |
| 29 | C2 | PZ  | -0.10910 | 0.14903  | 0.22670  | 0.54919  |
| 30 | C2 | DXX | 0.00000  | 0.00000  | 0.00000  | 0.00000  |
| 31 | C2 | DYY | 0.00000  | 0.00000  | 0.00000  | 0.00000  |
| 32 | C2 | DZZ | 0.00000  | 0.00000  | 0.00000  | 0.00000  |
| 33 | C2 | DXY | 0.00000  | 0.00000  | 0.00000  | 0.00000  |
| 34 | C2 | DXZ | 0.00070  | 0.00344  | 0.00713  | -0.00840 |
| 35 | C2 | DYZ | -0.01817 | 0.00847  | -0.01507 | -0.00783 |
| 36 | C3 | S   | 0.00000  | 0.00000  | 0.00000  | 0.00000  |
| 37 | C3 | S   | 0.00000  | 0.00000  | 0.00000  | 0.00000  |
| 38 | C3 | PX  | 0.00000  | 0.00000  | 0.00000  | 0.00000  |
| 39 | C3 | PY  | 0.00000  | 0.00000  | 0.00000  | 0.00000  |
| 40 | C3 | PZ  | 0.13961  | 0.16922  | 0.12553  | -0.21038 |
| 41 | C3 | S   | 0.00000  | 0.00000  | 0.00000  | 0.00000  |
| 42 | C3 | PX  | 0.00000  | 0.00000  | 0.00000  | 0.00000  |
| 43 | C3 | PY  | 0.00000  | 0.00000  | 0.00000  | 0.00000  |
| 44 | C3 | PZ  | 0.11812  | 0.16547  | 0.15524  | -0.38075 |
| 45 | C3 | DXX | 0.00000  | 0.00000  | 0.00000  | 0.00000  |
| 46 | C3 | DYY | 0.00000  | 0.00000  | 0.00000  | 0.00000  |



|     |    |     |          |          |          |          |          |
|-----|----|-----|----------|----------|----------|----------|----------|
| 47  | C3 | DZZ | 0.00000  | 0.00000  | 0.00000  | 0.00000  | 0.00000  |
| 48  | C3 | DXY | 0.00000  | 0.00000  | 0.00000  | 0.00000  | 0.00000  |
| 49  | C3 | DXZ | -0.00581 | 0.00727  | -0.01383 | 0.01423  | -0.01313 |
| 50  | C3 | DYZ | -0.00461 | -0.02533 | 0.01634  | 0.00929  | -0.02113 |
| 51  | C4 | S   | 0.00000  | 0.00000  | 0.00000  | 0.00000  | 0.00000  |
| 52  | C4 | S   | 0.00000  | 0.00000  | 0.00000  | 0.00000  | 0.00000  |
| 53  | C4 | PX  | 0.00000  | 0.00000  | 0.00000  | 0.00000  | 0.00000  |
| 54  | C4 | PY  | 0.00000  | 0.00000  | 0.00000  | 0.00000  | 0.00000  |
| 55  | C4 | PZ  | -0.08024 | -0.22400 | -0.16130 | -0.08844 | 0.34258  |
| 56  | C4 | S   | 0.00000  | 0.00000  | 0.00000  | 0.00000  | 0.00000  |
| 57  | C4 | PX  | 0.00000  | 0.00000  | 0.00000  | 0.00000  | 0.00000  |
| 58  | C4 | PY  | 0.00000  | 0.00000  | 0.00000  | 0.00000  | 0.00000  |
| 59  | C4 | PZ  | -0.05219 | -0.19200 | -0.17043 | -0.16732 | 0.58402  |
| 60  | C4 | DXX | 0.00000  | 0.00000  | 0.00000  | 0.00000  | 0.00000  |
| 61  | C4 | DYY | 0.00000  | 0.00000  | 0.00000  | 0.00000  | 0.00000  |
| 62  | C4 | DZZ | 0.00000  | 0.00000  | 0.00000  | 0.00000  | 0.00000  |
| 63  | C4 | DXY | 0.00000  | 0.00000  | 0.00000  | 0.00000  | 0.00000  |
| 64  | C4 | DXZ | 0.00756  | -0.01753 | 0.01479  | 0.02904  | 0.00401  |
| 65  | C4 | DYZ | 0.00778  | 0.01829  | 0.00149  | -0.00121 | 0.00332  |
| 66  | C5 | S   | 0.00000  | 0.00000  | 0.00000  | 0.00000  | 0.00000  |
| 67  | C5 | S   | 0.00000  | 0.00000  | 0.00000  | 0.00000  | 0.00000  |
| 68  | C5 | PX  | 0.00000  | 0.00000  | 0.00000  | 0.00000  | 0.00000  |
| 69  | C5 | PY  | 0.00000  | 0.00000  | 0.00000  | 0.00000  | 0.00000  |
| 70  | C5 | PZ  | -0.20954 | 0.09769  | -0.18409 | -0.19910 | -0.20184 |
| 71  | C5 | S   | 0.00000  | 0.00000  | 0.00000  | 0.00000  | 0.00000  |
| 72  | C5 | PX  | 0.00000  | 0.00000  | 0.00000  | 0.00000  | 0.00000  |
| 73  | C5 | PY  | 0.00000  | 0.00000  | 0.00000  | 0.00000  | 0.00000  |
| 74  | C5 | PZ  | -0.17959 | 0.10648  | -0.25284 | -0.41246 | -0.40746 |
| 75  | C5 | DXX | 0.00000  | 0.00000  | 0.00000  | 0.00000  | 0.00000  |
| 76  | C5 | DYY | 0.00000  | 0.00000  | 0.00000  | 0.00000  | 0.00000  |
| 77  | C5 | DZZ | 0.00000  | 0.00000  | 0.00000  | 0.00000  | 0.00000  |
| 78  | C5 | DXY | 0.00000  | 0.00000  | 0.00000  | 0.00000  | 0.00000  |
| 79  | C5 | DXZ | -0.00191 | -0.01026 | -0.00887 | -0.01403 | 0.02083  |
| 80  | C5 | DYZ | 0.00848  | -0.01222 | -0.01149 | -0.02125 | 0.00585  |
| 81  | C6 | S   | 0.00000  | 0.00000  | 0.00000  | 0.00000  | 0.00000  |
| 82  | C6 | S   | 0.00000  | 0.00000  | 0.00000  | 0.00000  | 0.00000  |
| 83  | C6 | PX  | 0.00000  | 0.00000  | 0.00000  | 0.00000  | 0.00000  |
| 84  | C6 | PY  | 0.00000  | 0.00000  | 0.00000  | 0.00000  | 0.00000  |
| 85  | C6 | PZ  | 0.21093  | -0.01530 | 0.17335  | -0.12048 | 0.25817  |
| 86  | C6 | S   | 0.00000  | 0.00000  | 0.00000  | 0.00000  | 0.00000  |
| 87  | C6 | PX  | 0.00000  | 0.00000  | 0.00000  | 0.00000  | 0.00000  |
| 88  | C6 | PY  | 0.00000  | 0.00000  | 0.00000  | 0.00000  | 0.00000  |
| 89  | C6 | PZ  | 0.17581  | -0.02564 | 0.17898  | -0.18729 | 0.46859  |
| 90  | C6 | DXX | 0.00000  | 0.00000  | 0.00000  | 0.00000  | 0.00000  |
| 91  | C6 | DYY | 0.00000  | 0.00000  | 0.00000  | 0.00000  | 0.00000  |
| 92  | C6 | DZZ | 0.00000  | 0.00000  | 0.00000  | 0.00000  | 0.00000  |
| 93  | C6 | DXY | 0.00000  | 0.00000  | 0.00000  | 0.00000  | 0.00000  |
| 94  | C6 | DXZ | 0.00706  | 0.00432  | -0.00204 | -0.02435 | -0.00940 |
| 95  | C6 | DYZ | -0.01503 | 0.02087  | 0.02387  | 0.00433  | 0.00987  |
| 96  | C7 | S   | 0.00000  | 0.00000  | 0.00000  | 0.00000  | 0.00000  |
| 97  | C7 | S   | 0.00000  | 0.00000  | 0.00000  | 0.00000  | 0.00000  |
| 98  | C7 | PX  | 0.00000  | 0.00000  | 0.00000  | 0.00000  | 0.00000  |
| 99  | C7 | PY  | 0.00000  | 0.00000  | 0.00000  | 0.00000  | 0.00000  |
| 100 | C7 | PZ  | -0.00309 | 0.27311  | -0.21089 | 0.09618  | 0.15049  |

|     |    |     |          |          |          |          |          |
|-----|----|-----|----------|----------|----------|----------|----------|
| 101 | C7 | S   | 0.00000  | 0.00000  | 0.00000  | 0.00000  | 0.00000  |
| 102 | C7 | PX  | 0.00000  | 0.00000  | 0.00000  | 0.00000  | 0.00000  |
| 103 | C7 | PY  | 0.00000  | 0.00000  | 0.00000  | 0.00000  | 0.00000  |
| 104 | C7 | PZ  | -0.00479 | 0.25381  | -0.26918 | 0.21400  | 0.31348  |
| 105 | C7 | DXX | 0.00000  | 0.00000  | 0.00000  | 0.00000  | 0.00000  |
| 106 | C7 | DYY | 0.00000  | 0.00000  | 0.00000  | 0.00000  | 0.00000  |
| 107 | C7 | DZZ | 0.00000  | 0.00000  | 0.00000  | 0.00000  | 0.00000  |
| 108 | C7 | DXY | 0.00000  | 0.00000  | 0.00000  | 0.00000  | 0.00000  |
| 109 | C7 | DXZ | -0.00125 | -0.00977 | 0.00279  | 0.00355  | 0.00334  |
| 110 | C7 | DYZ | 0.01474  | 0.01023  | 0.00682  | -0.01767 | -0.01250 |
| 111 | O1 | S   | 0.00000  | 0.00000  | 0.00000  | 0.00000  | 0.00000  |
| 112 | O1 | S   | 0.00000  | 0.00000  | 0.00000  | 0.00000  | 0.00000  |
| 113 | O1 | PX  | 0.00000  | 0.00000  | 0.00000  | 0.00000  | 0.00000  |
| 114 | O1 | PY  | 0.00000  | 0.00000  | 0.00000  | 0.00000  | 0.00000  |
| 115 | O1 | PZ  | 0.09876  | 0.16033  | 0.08997  | 0.06019  | -0.11936 |
| 116 | O1 | S   | 0.00000  | 0.00000  | 0.00000  | 0.00000  | 0.00000  |
| 117 | O1 | PX  | 0.00000  | 0.00000  | 0.00000  | 0.00000  | 0.00000  |
| 118 | O1 | PY  | 0.00000  | 0.00000  | 0.00000  | 0.00000  | 0.00000  |
| 119 | O1 | PZ  | 0.08931  | 0.15819  | 0.09326  | 0.08020  | -0.16892 |
| 120 | O1 | DXX | 0.00000  | 0.00000  | 0.00000  | 0.00000  | 0.00000  |
| 121 | O1 | DYY | 0.00000  | 0.00000  | 0.00000  | 0.00000  | 0.00000  |
| 122 | O1 | DZZ | 0.00000  | 0.00000  | 0.00000  | 0.00000  | 0.00000  |
| 123 | O1 | DXY | 0.00000  | 0.00000  | 0.00000  | 0.00000  | 0.00000  |
| 124 | O1 | DXZ | 0.00345  | 0.00396  | 0.00526  | 0.00748  | -0.00390 |
| 125 | O1 | DYZ | -0.00001 | 0.00293  | 0.00572  | 0.00300  | -0.01615 |
| 126 | H4 | S   | 0.00000  | 0.00000  | 0.00000  | 0.00000  | 0.00000  |
| 127 | H4 | S   | 0.00000  | 0.00000  | 0.00000  | 0.00000  | 0.00000  |
| 128 | H4 | PX  | 0.00000  | 0.00000  | 0.00000  | 0.00000  | 0.00000  |
| 129 | H4 | PY  | 0.00000  | 0.00000  | 0.00000  | 0.00000  | 0.00000  |
| 130 | H4 | PZ  | -0.00478 | 0.00240  | -0.00617 | -0.00811 | -0.00938 |
| 131 | N1 | S   | 0.00000  | 0.00000  | 0.00000  | 0.00000  | 0.00000  |
| 132 | N1 | S   | 0.00000  | 0.00000  | 0.00000  | 0.00000  | 0.00000  |
| 133 | N1 | PX  | 0.00000  | 0.00000  | 0.00000  | 0.00000  | 0.00000  |
| 134 | N1 | PY  | 0.00000  | 0.00000  | 0.00000  | 0.00000  | 0.00000  |
| 135 | N1 | PZ  | 0.16889  | -0.22253 | -0.19390 | 0.00111  | -0.18178 |
| 136 | N1 | S   | 0.00000  | 0.00000  | 0.00000  | 0.00000  | 0.00000  |
| 137 | N1 | PX  | 0.00000  | 0.00000  | 0.00000  | 0.00000  | 0.00000  |
| 138 | N1 | PY  | 0.00000  | 0.00000  | 0.00000  | 0.00000  | 0.00000  |
| 139 | N1 | PZ  | 0.15004  | -0.20173 | -0.21764 | 0.01862  | -0.30439 |
| 140 | N1 | DXX | 0.00000  | 0.00000  | 0.00000  | 0.00000  | 0.00000  |
| 141 | N1 | DYY | 0.00000  | 0.00000  | 0.00000  | 0.00000  | 0.00000  |
| 142 | N1 | DZZ | 0.00000  | 0.00000  | 0.00000  | 0.00000  | 0.00000  |
| 143 | N1 | DXY | 0.00000  | 0.00000  | 0.00000  | 0.00000  | 0.00000  |
| 144 | N1 | DXZ | 0.00175  | -0.01066 | -0.01315 | 0.00351  | -0.01200 |
| 145 | N1 | DYZ | 0.02184  | -0.00769 | 0.00163  | -0.00817 | 0.01206  |
| 146 | H6 | S   | 0.00000  | 0.00000  | 0.00000  | 0.00000  | 0.00000  |
| 147 | H6 | S   | 0.00000  | 0.00000  | 0.00000  | 0.00000  | 0.00000  |
| 148 | H6 | PX  | 0.00000  | 0.00000  | 0.00000  | 0.00000  | 0.00000  |
| 149 | H6 | PY  | 0.00000  | 0.00000  | 0.00000  | 0.00000  | 0.00000  |
| 150 | H6 | PZ  | -0.00259 | 0.00424  | 0.00436  | 0.01246  | 0.00053  |
| 151 | C8 | S   | 0.00000  | 0.00000  | 0.00000  | 0.00000  | 0.00000  |
| 152 | C8 | S   | 0.00000  | 0.00000  | 0.00000  | 0.00000  | 0.00000  |
| 153 | C8 | PX  | 0.00000  | 0.00000  | 0.00000  | 0.00000  | 0.00000  |
| 154 | C8 | PY  | 0.00000  | 0.00000  | 0.00000  | 0.00000  | 0.00000  |

|     |     |     |          |          |          |          |          |
|-----|-----|-----|----------|----------|----------|----------|----------|
| 155 | C8  | PZ  | -0.24885 | -0.03916 | -0.08851 | 0.17224  | -0.04798 |
| 156 | C8  | S   | 0.00000  | 0.00000  | 0.00000  | 0.00000  | 0.00000  |
| 157 | C8  | PX  | 0.00000  | 0.00000  | 0.00000  | 0.00000  | 0.00000  |
| 158 | C8  | PY  | 0.00000  | 0.00000  | 0.00000  | 0.00000  | 0.00000  |
| 159 | C8  | PZ  | -0.19579 | -0.04032 | -0.13599 | 0.23399  | -0.07956 |
| 160 | C8  | DXX | 0.00000  | 0.00000  | 0.00000  | 0.00000  | 0.00000  |
| 161 | C8  | DYY | 0.00000  | 0.00000  | 0.00000  | 0.00000  | 0.00000  |
| 162 | C8  | DZZ | 0.00000  | 0.00000  | 0.00000  | 0.00000  | 0.00000  |
| 163 | C8  | DXY | 0.00000  | 0.00000  | 0.00000  | 0.00000  | 0.00000  |
| 164 | C8  | DXZ | -0.01301 | 0.01692  | 0.00655  | 0.00418  | 0.02098  |
| 165 | C8  | DYZ | 0.02377  | 0.00932  | -0.02649 | 0.01025  | 0.00357  |
| 166 | H8  | S   | 0.00000  | 0.00000  | 0.00000  | 0.00000  | 0.00000  |
| 167 | H8  | S   | 0.00000  | 0.00000  | 0.00000  | 0.00000  | 0.00000  |
| 168 | H8  | PX  | 0.00000  | 0.00000  | 0.00000  | 0.00000  | 0.00000  |
| 169 | H8  | PY  | 0.00000  | 0.00000  | 0.00000  | 0.00000  | 0.00000  |
| 170 | H8  | PZ  | -0.00036 | 0.00699  | -0.00733 | 0.00449  | 0.00718  |
| 171 | C10 | S   | 0.00000  | 0.00000  | 0.00000  | 0.00000  | 0.00000  |
| 172 | C10 | S   | 0.00000  | 0.00000  | 0.00000  | 0.00000  | 0.00000  |
| 173 | C10 | PX  | 0.00000  | 0.00000  | 0.00000  | 0.00000  | 0.00000  |
| 174 | C10 | PY  | 0.00000  | 0.00000  | 0.00000  | 0.00000  | 0.00000  |
| 175 | C10 | PZ  | -0.29828 | -0.05634 | 0.26317  | -0.16804 | 0.03159  |
| 176 | C10 | S   | 0.00000  | 0.00000  | 0.00000  | 0.00000  | 0.00000  |
| 177 | C10 | PX  | 0.00000  | 0.00000  | 0.00000  | 0.00000  | 0.00000  |
| 178 | C10 | PY  | 0.00000  | 0.00000  | 0.00000  | 0.00000  | 0.00000  |
| 179 | C10 | PZ  | -0.26390 | -0.05066 | 0.37306  | -0.30374 | 0.07443  |
| 180 | C10 | DXX | 0.00000  | 0.00000  | 0.00000  | 0.00000  | 0.00000  |
| 181 | C10 | DYY | 0.00000  | 0.00000  | 0.00000  | 0.00000  | 0.00000  |
| 182 | C10 | DZZ | 0.00000  | 0.00000  | 0.00000  | 0.00000  | 0.00000  |
| 183 | C10 | DXY | 0.00000  | 0.00000  | 0.00000  | 0.00000  | 0.00000  |
| 184 | C10 | DXZ | 0.00259  | 0.00281  | 0.00098  | -0.00145 | 0.00575  |
| 185 | C10 | DYZ | -0.01893 | -0.00256 | -0.00244 | 0.01199  | -0.00231 |
| 186 | H16 | S   | 0.00000  | 0.00000  | 0.00000  | 0.00000  | 0.00000  |
| 187 | H16 | S   | 0.00000  | 0.00000  | 0.00000  | 0.00000  | 0.00000  |
| 188 | H16 | PX  | 0.00000  | 0.00000  | 0.00000  | 0.00000  | 0.00000  |
| 189 | H16 | PY  | 0.00000  | 0.00000  | 0.00000  | 0.00000  | 0.00000  |
| 190 | H16 | PZ  | -0.00710 | -0.00102 | 0.00867  | -0.00722 | 0.00243  |
| 191 | H18 | S   | 0.00000  | 0.00000  | 0.00000  | 0.00000  | 0.00000  |
| 192 | H18 | S   | 0.00000  | 0.00000  | 0.00000  | 0.00000  | 0.00000  |
| 193 | H18 | PX  | 0.00000  | 0.00000  | 0.00000  | 0.00000  | 0.00000  |
| 194 | H18 | PY  | 0.00000  | 0.00000  | 0.00000  | 0.00000  | 0.00000  |
| 195 | H18 | PZ  | -0.00657 | -0.00174 | 0.00831  | -0.00738 | 0.00055  |
| 196 | C9  | S   | 0.00000  | 0.00000  | 0.00000  | 0.00000  | 0.00000  |
| 197 | C9  | S   | 0.00000  | 0.00000  | 0.00000  | 0.00000  | 0.00000  |
| 198 | C9  | PX  | 0.00000  | 0.00000  | 0.00000  | 0.00000  | 0.00000  |
| 199 | C9  | PY  | 0.00000  | 0.00000  | 0.00000  | 0.00000  | 0.00000  |
| 200 | C9  | PZ  | -0.01648 | 0.00190  | -0.00200 | -0.02571 | -0.04464 |
| 201 | C9  | S   | 0.00000  | 0.00000  | 0.00000  | 0.00000  | 0.00000  |
| 202 | C9  | PX  | 0.00000  | 0.00000  | 0.00000  | 0.00000  | 0.00000  |
| 203 | C9  | PY  | 0.00000  | 0.00000  | 0.00000  | 0.00000  | 0.00000  |
| 204 | C9  | PZ  | -0.00055 | 0.03193  | 0.02738  | -0.04912 | -0.17572 |
| 205 | C9  | DXX | 0.00000  | 0.00000  | 0.00000  | 0.00000  | 0.00000  |
| 206 | C9  | DYY | 0.00000  | 0.00000  | 0.00000  | 0.00000  | 0.00000  |
| 207 | C9  | DZZ | 0.00000  | 0.00000  | 0.00000  | 0.00000  | 0.00000  |
| 208 | C9  | DXY | 0.00000  | 0.00000  | 0.00000  | 0.00000  | 0.00000  |

|     |    |     |          |          |          |          |          |
|-----|----|-----|----------|----------|----------|----------|----------|
| 209 | C9 | DXZ | -0.00576 | -0.00774 | -0.00645 | -0.00633 | 0.00945  |
| 210 | C9 | DYZ | -0.00071 | -0.00067 | -0.00116 | -0.00186 | -0.00122 |
| 211 | H3 | S   | 0.00000  | 0.00000  | 0.00000  | 0.00000  | 0.00000  |
| 212 | H3 | S   | 0.00000  | 0.00000  | 0.00000  | 0.00000  | 0.00000  |
| 213 | H3 | PX  | 0.00000  | 0.00000  | 0.00000  | 0.00000  | 0.00000  |
| 214 | H3 | PY  | 0.00000  | 0.00000  | 0.00000  | 0.00000  | 0.00000  |
| 215 | H3 | PZ  | -0.00042 | -0.00017 | -0.00028 | -0.00055 | -0.00123 |
| 216 | H5 | S   | 0.01770  | 0.01653  | 0.01498  | 0.01802  | -0.02033 |
| 217 | H5 | S   | 0.02831  | 0.06204  | 0.04534  | -0.04716 | -0.21259 |
| 218 | H5 | PX  | -0.00021 | -0.00045 | 0.00015  | 0.00114  | -0.00006 |
| 219 | H5 | PY  | 0.00030  | -0.00061 | 0.00063  | 0.00191  | 0.00027  |
| 220 | H5 | PZ  | 0.00037  | 0.00051  | 0.00015  | -0.00062 | -0.00042 |
| 221 | H7 | S   | -0.01770 | -0.01653 | -0.01498 | -0.01802 | 0.02033  |
| 222 | H7 | S   | -0.02831 | -0.06204 | -0.04534 | 0.04716  | 0.21259  |
| 223 | H7 | PX  | 0.00021  | 0.00045  | -0.00015 | -0.00114 | 0.00006  |
| 224 | H7 | PY  | -0.00030 | 0.00061  | -0.00063 | -0.00191 | -0.00027 |
| 225 | H7 | PZ  | 0.00037  | 0.00051  | 0.00015  | -0.00062 | -0.00042 |

|              |         |         |         |         |         |
|--------------|---------|---------|---------|---------|---------|
| MO:          | 46      | 47      | 48      | 49      | 50      |
| Eigenvalues: | 0.24034 | 0.26187 | 0.27027 | 0.28712 | 0.28819 |
| (ev):        | 6.53990 | 7.12597 | 7.35443 | 7.81290 | 7.84201 |

|    |    |     |          |          |          |         |          |
|----|----|-----|----------|----------|----------|---------|----------|
|    |    | A   | A        | A        | A        | A       |          |
| 1  | H1 | S   | -0.00619 | 0.03893  | 0.02832  | 0.00000 | -0.03004 |
| 2  | H1 | S   | 1.08684  | 0.20809  | 0.66057  | 0.00000 | -0.85845 |
| 3  | H1 | PX  | -0.00260 | 0.00192  | -0.00132 | 0.00000 | 0.00245  |
| 4  | H1 | PY  | 0.00254  | -0.00148 | -0.00673 | 0.00000 | 0.00480  |
| 5  | H1 | PZ  | 0.00000  | 0.00000  | 0.00000  | 0.00401 | 0.00000  |
| 6  | C1 | S   | 0.05094  | 0.01548  | 0.01412  | 0.00000 | -0.01494 |
| 7  | C1 | S   | -0.09647 | -0.02132 | 0.01187  | 0.00000 | -0.01147 |
| 8  | C1 | PX  | -0.11575 | -0.00380 | -0.06031 | 0.00000 | 0.09776  |
| 9  | C1 | PY  | -0.05439 | 0.00687  | -0.03961 | 0.00000 | 0.03417  |
| 10 | C1 | PZ  | 0.00000  | 0.00000  | 0.00000  | 0.03752 | 0.00000  |
| 11 | C1 | S   | -0.57641 | -0.10038 | -0.51255 | 0.00000 | 0.59910  |
| 12 | C1 | PX  | -0.68766 | 0.03191  | -0.27120 | 0.00000 | 0.29158  |
| 13 | C1 | PY  | -0.20704 | -0.17457 | -0.28345 | 0.00000 | 0.50676  |
| 14 | C1 | PZ  | 0.00000  | 0.00000  | 0.00000  | 0.20662 | 0.00000  |
| 15 | C1 | DXX | -0.00170 | 0.01614  | 0.01332  | 0.00000 | -0.01069 |
| 16 | C1 | DYY | -0.00101 | -0.00600 | -0.01096 | 0.00000 | 0.00874  |
| 17 | C1 | DZZ | 0.00082  | -0.00324 | 0.00234  | 0.00000 | -0.00267 |
| 18 | C1 | DXY | 0.00190  | 0.00092  | -0.00032 | 0.00000 | -0.00140 |
| 19 | C1 | DXZ | 0.00000  | 0.00000  | 0.00000  | 0.00830 | 0.00000  |
| 20 | C1 | DYZ | 0.00000  | 0.00000  | 0.00000  | 0.00573 | 0.00000  |
| 21 | C2 | S   | 0.01054  | 0.04900  | 0.01417  | 0.00000 | 0.01593  |
| 22 | C2 | S   | -0.02742 | -0.06174 | -0.01166 | 0.00000 | -0.01555 |
| 23 | C2 | PX  | 0.01756  | 0.13624  | 0.04484  | 0.00000 | 0.09234  |
| 24 | C2 | PY  | -0.00273 | 0.03270  | -0.00946 | 0.00000 | 0.03848  |
| 25 | C2 | PZ  | 0.00000  | 0.00000  | 0.00000  | 0.04340 | 0.00000  |
| 26 | C2 | S   | -0.19832 | -0.90900 | -0.36237 | 0.00000 | -0.32974 |
| 27 | C2 | PX  | 0.12896  | 0.53309  | 0.05994  | 0.00000 | 0.40415  |
| 28 | C2 | PY  | -0.01499 | 0.41024  | -0.06562 | 0.00000 | 0.29295  |
| 29 | C2 | PZ  | 0.00000  | 0.00000  | 0.00000  | 0.14642 | 0.00000  |
| 30 | C2 | DXX | 0.00150  | 0.01467  | -0.00216 | 0.00000 | 0.00623  |
| 31 | C2 | DYY | -0.00118 | -0.01093 | 0.00084  | 0.00000 | -0.00457 |

|    |    |     |          |          |          |          |          |
|----|----|-----|----------|----------|----------|----------|----------|
| 32 | C2 | DZZ | -0.00258 | -0.00003 | 0.00021  | 0.00000  | 0.00090  |
| 33 | C2 | DXY | 0.00127  | 0.01071  | 0.00380  | 0.00000  | 0.00547  |
| 34 | C2 | DXZ | 0.00000  | 0.00000  | 0.00000  | -0.00932 | 0.00000  |
| 35 | C2 | DYZ | 0.00000  | 0.00000  | 0.00000  | 0.00260  | 0.00000  |
| 36 | C3 | S   | -0.00308 | 0.02750  | 0.00517  | 0.00000  | -0.01280 |
| 37 | C3 | S   | 0.01417  | -0.06468 | 0.00531  | 0.00000  | -0.00644 |
| 38 | C3 | PX  | -0.00424 | 0.02618  | -0.01320 | 0.00000  | 0.09111  |
| 39 | C3 | PY  | 0.03231  | 0.00581  | -0.07439 | 0.00000  | 0.02315  |
| 40 | C3 | PZ  | 0.00000  | 0.00000  | 0.00000  | -0.08611 | 0.00000  |
| 41 | C3 | S   | -0.28257 | -0.11029 | -0.55799 | 0.00000  | 0.79586  |
| 42 | C3 | PX  | 0.05252  | -0.28012 | 0.17599  | 0.00000  | 0.21015  |
| 43 | C3 | PY  | 0.10233  | -0.10052 | 0.14321  | 0.00000  | -0.02272 |
| 44 | C3 | PZ  | 0.00000  | 0.00000  | 0.00000  | -0.30890 | 0.00000  |
| 45 | C3 | DXX | -0.00139 | 0.01128  | -0.01130 | 0.00000  | 0.00919  |
| 46 | C3 | DYY | -0.00402 | -0.00749 | 0.00683  | 0.00000  | -0.00404 |
| 47 | C3 | DZZ | 0.00119  | -0.00352 | -0.00166 | 0.00000  | -0.00170 |
| 48 | C3 | DXY | -0.00875 | -0.00978 | -0.00137 | 0.00000  | -0.00064 |
| 49 | C3 | DXZ | 0.00000  | 0.00000  | 0.00000  | 0.02664  | 0.00000  |
| 50 | C3 | DYZ | 0.00000  | 0.00000  | 0.00000  | -0.00417 | 0.00000  |
| 51 | C4 | S   | -0.00321 | 0.01247  | 0.00197  | 0.00000  | 0.00625  |
| 52 | C4 | S   | -0.02486 | -0.01750 | 0.00909  | 0.00000  | -0.03073 |
| 53 | C4 | PX  | -0.00618 | 0.01113  | -0.00306 | 0.00000  | 0.02019  |
| 54 | C4 | PY  | -0.03216 | -0.08070 | -0.09100 | 0.00000  | 0.06727  |
| 55 | C4 | PZ  | 0.00000  | 0.00000  | 0.00000  | -0.01878 | 0.00000  |
| 56 | C4 | S   | 0.01515  | 0.06311  | 0.04453  | 0.00000  | -0.11309 |
| 57 | C4 | PX  | -0.02026 | -0.04517 | 0.07317  | 0.00000  | -0.28361 |
| 58 | C4 | PY  | 0.30425  | -0.08013 | -0.10468 | 0.00000  | 0.19724  |
| 59 | C4 | PZ  | 0.00000  | 0.00000  | 0.00000  | -0.11812 | 0.00000  |
| 60 | C4 | DXX | -0.01474 | -0.00938 | -0.01108 | 0.00000  | 0.00934  |
| 61 | C4 | DYY | 0.01511  | 0.02505  | 0.02022  | 0.00000  | -0.00988 |
| 62 | C4 | DZZ | -0.00253 | -0.00586 | -0.00427 | 0.00000  | 0.00139  |
| 63 | C4 | DXY | 0.00924  | 0.01180  | 0.00252  | 0.00000  | 0.00850  |
| 64 | C4 | DXZ | 0.00000  | 0.00000  | 0.00000  | 0.00409  | 0.00000  |
| 65 | C4 | DYZ | 0.00000  | 0.00000  | 0.00000  | 0.00287  | 0.00000  |
| 66 | C5 | S   | 0.01515  | 0.04388  | 0.01875  | 0.00000  | 0.01638  |
| 67 | C5 | S   | -0.02142 | -0.04567 | -0.02363 | 0.00000  | 0.00073  |
| 68 | C5 | PX  | 0.00917  | 0.11400  | 0.02734  | 0.00000  | 0.09577  |
| 69 | C5 | PY  | -0.02867 | -0.09987 | -0.06392 | 0.00000  | -0.04198 |
| 70 | C5 | PZ  | 0.00000  | 0.00000  | 0.00000  | 0.01654  | 0.00000  |
| 71 | C5 | S   | -0.17293 | -1.00320 | -0.20067 | 0.00000  | -0.69296 |
| 72 | C5 | PX  | 0.04067  | 0.30822  | 0.09382  | 0.00000  | 0.20899  |
| 73 | C5 | PY  | -0.24188 | -0.44948 | -0.29734 | 0.00000  | -0.20524 |
| 74 | C5 | PZ  | 0.00000  | 0.00000  | 0.00000  | -0.02684 | 0.00000  |
| 75 | C5 | DXX | 0.00621  | 0.00432  | 0.00769  | 0.00000  | -0.01111 |
| 76 | C5 | DYY | -0.00471 | -0.00177 | -0.00140 | 0.00000  | 0.00290  |
| 77 | C5 | DZZ | 0.00111  | 0.00031  | -0.00084 | 0.00000  | 0.00392  |
| 78 | C5 | DXY | -0.00911 | -0.01916 | -0.00988 | 0.00000  | -0.00115 |
| 79 | C5 | DXZ | 0.00000  | 0.00000  | 0.00000  | -0.00585 | 0.00000  |
| 80 | C5 | DYZ | 0.00000  | 0.00000  | 0.00000  | -0.00170 | 0.00000  |
| 81 | C6 | S   | 0.00971  | 0.00361  | 0.00870  | 0.00000  | -0.00991 |
| 82 | C6 | S   | -0.02500 | -0.00510 | -0.03215 | 0.00000  | 0.03227  |
| 83 | C6 | PX  | -0.03025 | 0.03576  | -0.03611 | 0.00000  | 0.03921  |
| 84 | C6 | PY  | -0.00328 | 0.03687  | -0.03602 | 0.00000  | -0.00720 |
| 85 | C6 | PZ  | 0.00000  | 0.00000  | 0.00000  | -0.09263 | 0.00000  |

|     |    |     |          |          |          |          |          |
|-----|----|-----|----------|----------|----------|----------|----------|
| 86  | C6 | S   | 0.02000  | -0.03886 | 0.15318  | 0.00000  | 0.10525  |
| 87  | C6 | PX  | 0.04187  | -0.25476 | 0.03621  | 0.00000  | -0.03187 |
| 88  | C6 | PY  | -0.09139 | -0.11285 | -0.00845 | 0.00000  | -0.14376 |
| 89  | C6 | PZ  | 0.00000  | 0.00000  | 0.00000  | -0.26219 | 0.00000  |
| 90  | C6 | DXX | -0.00279 | -0.01897 | 0.00864  | 0.00000  | -0.01259 |
| 91  | C6 | DYY | 0.00744  | 0.02347  | -0.00077 | 0.00000  | 0.01290  |
| 92  | C6 | DZZ | -0.00213 | -0.00172 | -0.00414 | 0.00000  | 0.00200  |
| 93  | C6 | DXY | 0.00555  | -0.00015 | -0.00057 | 0.00000  | -0.00521 |
| 94  | C6 | DXZ | 0.00000  | 0.00000  | 0.00000  | -0.01943 | 0.00000  |
| 95  | C6 | DYZ | 0.00000  | 0.00000  | 0.00000  | -0.02113 | 0.00000  |
| 96  | C7 | S   | -0.00025 | -0.02390 | 0.04688  | 0.00000  | -0.00671 |
| 97  | C7 | S   | -0.00581 | 0.04419  | -0.06732 | 0.00000  | 0.00865  |
| 98  | C7 | PX  | -0.01761 | 0.05800  | -0.18041 | 0.00000  | 0.07349  |
| 99  | C7 | PY  | 0.01734  | 0.02943  | 0.02840  | 0.00000  | 0.01052  |
| 100 | C7 | PZ  | 0.00000  | 0.00000  | 0.00000  | 0.21306  | 0.00000  |
| 101 | C7 | S   | 0.05476  | 0.26039  | -0.70134 | 0.00000  | 0.07176  |
| 102 | C7 | PX  | -0.15135 | 0.49960  | -1.07502 | 0.00000  | 0.42282  |
| 103 | C7 | PY  | 0.15457  | 0.31217  | 0.12646  | 0.00000  | -0.43524 |
| 104 | C7 | PZ  | 0.00000  | 0.00000  | 0.00000  | 0.62851  | 0.00000  |
| 105 | C7 | DXX | -0.00207 | -0.00375 | 0.00321  | 0.00000  | -0.01455 |
| 106 | C7 | DYY | 0.00087  | 0.00053  | -0.00004 | 0.00000  | 0.00978  |
| 107 | C7 | DZZ | -0.00044 | 0.00051  | -0.00032 | 0.00000  | 0.00062  |
| 108 | C7 | DXY | 0.00186  | 0.00469  | -0.00258 | 0.00000  | -0.00187 |
| 109 | C7 | DXZ | 0.00000  | 0.00000  | 0.00000  | 0.02366  | 0.00000  |
| 110 | C7 | DYZ | 0.00000  | 0.00000  | 0.00000  | 0.01682  | 0.00000  |
| 111 | O1 | S   | -0.00429 | -0.02637 | -0.03259 | 0.00000  | 0.03394  |
| 112 | O1 | S   | 0.00399  | 0.04905  | 0.05186  | 0.00000  | -0.04810 |
| 113 | O1 | PX  | 0.04676  | 0.03350  | 0.05065  | 0.00000  | -0.06171 |
| 114 | O1 | PY  | -0.02972 | -0.06217 | -0.04713 | 0.00000  | 0.01427  |
| 115 | O1 | PZ  | 0.00000  | 0.00000  | 0.00000  | 0.01926  | 0.00000  |
| 116 | O1 | S   | -0.00273 | 0.27781  | 0.39420  | 0.00000  | -0.47112 |
| 117 | O1 | PX  | 0.15852  | 0.07491  | 0.12333  | 0.00000  | -0.15826 |
| 118 | O1 | PY  | 0.09908  | -0.03163 | -0.03626 | 0.00000  | 0.04233  |
| 119 | O1 | PZ  | 0.00000  | 0.00000  | 0.00000  | 0.06273  | 0.00000  |
| 120 | O1 | DXX | -0.00217 | 0.00333  | -0.00079 | 0.00000  | 0.00550  |
| 121 | O1 | DYY | -0.01146 | -0.01183 | -0.01108 | 0.00000  | 0.00523  |
| 122 | O1 | DZZ | 0.00134  | -0.00646 | -0.00975 | 0.00000  | 0.01049  |
| 123 | O1 | DXY | -0.00596 | -0.00477 | 0.00132  | 0.00000  | -0.01016 |
| 124 | O1 | DXZ | 0.00000  | 0.00000  | 0.00000  | 0.00178  | 0.00000  |
| 125 | O1 | DYZ | 0.00000  | 0.00000  | 0.00000  | -0.00172 | 0.00000  |
| 126 | H4 | S   | 0.02096  | 0.04489  | 0.02851  | 0.00000  | -0.00783 |
| 127 | H4 | S   | 0.33185  | 1.18998  | 0.52532  | 0.00000  | 0.60583  |
| 128 | H4 | PX  | -0.00087 | 0.00049  | -0.00219 | 0.00000  | 0.00585  |
| 129 | H4 | PY  | -0.00111 | -0.00283 | -0.00144 | 0.00000  | 0.00047  |
| 130 | H4 | PZ  | 0.00000  | 0.00000  | 0.00000  | 0.00116  | 0.00000  |
| 131 | N1 | S   | -0.00046 | -0.01114 | 0.01356  | 0.00000  | -0.00210 |
| 132 | N1 | S   | 0.01018  | 0.04777  | -0.05357 | 0.00000  | 0.02579  |
| 133 | N1 | PX  | -0.00043 | 0.01307  | -0.03989 | 0.00000  | 0.07087  |
| 134 | N1 | PY  | 0.02334  | 0.02993  | 0.03395  | 0.00000  | 0.02181  |
| 135 | N1 | PZ  | 0.00000  | 0.00000  | 0.00000  | 0.24798  | 0.00000  |
| 136 | N1 | S   | -0.04520 | -0.10487 | 0.08509  | 0.00000  | -0.17155 |
| 137 | N1 | PX  | -0.00809 | 0.00664  | 0.01086  | 0.00000  | 0.04287  |
| 138 | N1 | PY  | 0.00191  | -0.04749 | -0.01644 | 0.00000  | -0.05721 |
| 139 | N1 | PZ  | 0.00000  | 0.00000  | 0.00000  | 0.50593  | 0.00000  |

|     |     |     |          |          |          |          |          |
|-----|-----|-----|----------|----------|----------|----------|----------|
| 140 | N1  | DXX | 0.00441  | 0.00517  | 0.00071  | 0.00000  | -0.00356 |
| 141 | N1  | DYY | -0.00218 | -0.00750 | -0.00241 | 0.00000  | 0.00386  |
| 142 | N1  | DZZ | 0.00215  | 0.00661  | -0.00728 | 0.00000  | 0.00439  |
| 143 | N1  | DXY | -0.00225 | 0.00508  | -0.00421 | 0.00000  | 0.00798  |
| 144 | N1  | DXZ | 0.00000  | 0.00000  | 0.00000  | -0.01260 | 0.00000  |
| 145 | N1  | DYZ | 0.00000  | 0.00000  | 0.00000  | 0.01121  | 0.00000  |
| 146 | H6  | S   | 0.00610  | 0.04324  | -0.00559 | 0.00000  | 0.02550  |
| 147 | H6  | S   | 0.22392  | 1.22351  | 0.24505  | 0.00000  | 0.74365  |
| 148 | H6  | PX  | 0.00081  | 0.00260  | 0.00089  | 0.00000  | 0.00162  |
| 149 | H6  | PY  | 0.00096  | 0.00003  | -0.00013 | 0.00000  | 0.00066  |
| 150 | H6  | PZ  | 0.00000  | 0.00000  | 0.00000  | 0.00306  | 0.00000  |
| 151 | C8  | S   | -0.00745 | -0.00367 | -0.01191 | 0.00000  | 0.01143  |
| 152 | C8  | S   | 0.01386  | -0.01272 | 0.03365  | 0.00000  | -0.01122 |
| 153 | C8  | PX  | -0.00159 | 0.02899  | -0.02810 | 0.00000  | 0.03565  |
| 154 | C8  | PY  | 0.01770  | 0.01968  | 0.00538  | 0.00000  | -0.05602 |
| 155 | C8  | PZ  | 0.00000  | 0.00000  | 0.00000  | -0.39579 | 0.00000  |
| 156 | C8  | S   | 0.13811  | 0.39890  | -0.28415 | 0.00000  | -0.34031 |
| 157 | C8  | PX  | 0.06333  | 0.08820  | 0.21986  | 0.00000  | -0.17930 |
| 158 | C8  | PY  | -0.08972 | 0.24413  | -0.21555 | 0.00000  | 0.07315  |
| 159 | C8  | PZ  | 0.00000  | 0.00000  | 0.00000  | -0.87698 | 0.00000  |
| 160 | C8  | DXX | -0.00168 | 0.00249  | -0.01443 | 0.00000  | 0.01473  |
| 161 | C8  | DYY | 0.00157  | 0.00330  | 0.00655  | 0.00000  | -0.01119 |
| 162 | C8  | DZZ | 0.00061  | -0.00142 | 0.00087  | 0.00000  | -0.00134 |
| 163 | C8  | DXY | -0.00082 | -0.00445 | 0.00515  | 0.00000  | -0.00779 |
| 164 | C8  | DXZ | 0.00000  | 0.00000  | 0.00000  | -0.00292 | 0.00000  |
| 165 | C8  | DYZ | 0.00000  | 0.00000  | 0.00000  | -0.00217 | 0.00000  |
| 166 | H8  | S   | -0.00913 | -0.00938 | -0.00870 | 0.00000  | -0.03141 |
| 167 | H8  | S   | 0.13767  | -0.63734 | 1.55074  | 0.00000  | -0.59359 |
| 168 | H8  | PX  | -0.00115 | 0.00224  | -0.00654 | 0.00000  | -0.00023 |
| 169 | H8  | PY  | 0.00156  | 0.00261  | -0.00141 | 0.00000  | -0.00311 |
| 170 | H8  | PZ  | 0.00000  | 0.00000  | 0.00000  | 0.01426  | 0.00000  |
| 171 | C10 | S   | -0.00350 | -0.04121 | 0.05811  | 0.00000  | 0.07719  |
| 172 | C10 | S   | 0.00971  | 0.04891  | -0.05729 | 0.00000  | -0.09223 |
| 173 | C10 | PX  | 0.00321  | 0.06129  | -0.10503 | 0.00000  | 0.00463  |
| 174 | C10 | PY  | -0.00804 | -0.05219 | 0.09314  | 0.00000  | 0.12911  |
| 175 | C10 | PZ  | 0.00000  | 0.00000  | 0.00000  | 0.15426  | 0.00000  |
| 176 | C10 | S   | -0.04562 | 0.74536  | -1.14521 | 0.00000  | -1.11468 |
| 177 | C10 | PX  | 0.01985  | 0.20569  | -0.47057 | 0.00000  | 0.14040  |
| 178 | C10 | PY  | -0.09823 | -0.25327 | 0.33936  | 0.00000  | 0.63849  |
| 179 | C10 | PZ  | 0.00000  | 0.00000  | 0.00000  | 0.60369  | 0.00000  |
| 180 | C10 | DXX | -0.00082 | -0.00229 | 0.00197  | 0.00000  | 0.00447  |
| 181 | C10 | DYY | -0.00113 | -0.00063 | -0.00107 | 0.00000  | 0.00536  |
| 182 | C10 | DZZ | 0.00077  | -0.00217 | 0.00519  | 0.00000  | 0.00297  |
| 183 | C10 | DXY | -0.00045 | 0.00030  | -0.00226 | 0.00000  | 0.00714  |
| 184 | C10 | DXZ | 0.00000  | 0.00000  | 0.00000  | 0.00697  | 0.00000  |
| 185 | C10 | DYZ | 0.00000  | 0.00000  | 0.00000  | -0.02995 | 0.00000  |
| 186 | H16 | S   | -0.00050 | -0.00733 | 0.00825  | 0.00000  | 0.00102  |
| 187 | H16 | S   | -0.06089 | -0.71531 | 1.19181  | 0.00000  | 0.69927  |
| 188 | H16 | PX  | -0.00011 | 0.00091  | -0.00209 | 0.00000  | 0.00197  |
| 189 | H16 | PY  | -0.00020 | -0.00296 | 0.00482  | 0.00000  | 0.00340  |
| 190 | H16 | PZ  | 0.00000  | 0.00000  | 0.00000  | 0.01044  | 0.00000  |
| 191 | H18 | S   | -0.00066 | -0.01014 | 0.01453  | 0.00000  | 0.03636  |
| 192 | H18 | S   | -0.05236 | -0.31846 | 0.38882  | 0.00000  | 1.20170  |
| 193 | H18 | PX  | 0.00021  | 0.00054  | -0.00034 | 0.00000  | -0.00039 |

|     |     |     |          |          |          |          |          |
|-----|-----|-----|----------|----------|----------|----------|----------|
| 194 | H18 | PY  | 0.00017  | -0.00159 | 0.00213  | 0.00000  | 0.00234  |
| 195 | H18 | PZ  | 0.00000  | 0.00000  | 0.00000  | 0.00941  | 0.00000  |
| 196 | C9  | S   | 0.12324  | -0.02388 | -0.01554 | 0.00000  | 0.00859  |
| 197 | C9  | S   | -0.08691 | 0.01342  | 0.01833  | 0.00000  | -0.01893 |
| 198 | C9  | PX  | -0.11757 | 0.08721  | 0.07042  | 0.00000  | -0.03007 |
| 199 | C9  | PY  | -0.03064 | 0.01990  | 0.05310  | 0.00000  | -0.11934 |
| 200 | C9  | PZ  | 0.00000  | 0.00000  | 0.00000  | -0.04506 | 0.00000  |
| 201 | C9  | S   | -2.21528 | 0.50303  | 0.37139  | 0.00000  | -0.25642 |
| 202 | C9  | PX  | -0.36198 | 0.39307  | 0.38058  | 0.00000  | -0.28991 |
| 203 | C9  | PY  | -0.06116 | 0.00045  | 0.22787  | 0.00000  | -0.51874 |
| 204 | C9  | PZ  | 0.00000  | 0.00000  | 0.00000  | -0.18214 | 0.00000  |
| 205 | C9  | DXX | 0.00477  | -0.00394 | -0.00013 | 0.00000  | -0.00374 |
| 206 | C9  | DYY | 0.01537  | 0.00003  | -0.00028 | 0.00000  | 0.00391  |
| 207 | C9  | DZZ | 0.00676  | -0.00654 | -0.00563 | 0.00000  | 0.00495  |
| 208 | C9  | DXY | -0.00217 | 0.00457  | 0.00352  | 0.00000  | -0.00256 |
| 209 | C9  | DXZ | 0.00000  | 0.00000  | 0.00000  | -0.00129 | 0.00000  |
| 210 | C9  | DYZ | 0.00000  | 0.00000  | 0.00000  | -0.00103 | 0.00000  |
| 211 | H3  | S   | 0.01559  | 0.01435  | 0.00409  | 0.00000  | 0.00932  |
| 212 | H3  | S   | 0.89048  | -0.08429 | -0.30514 | 0.00000  | 0.67073  |
| 213 | H3  | PX  | -0.00236 | 0.00264  | 0.00213  | 0.00000  | -0.00169 |
| 214 | H3  | PY  | -0.00060 | -0.00059 | 0.00112  | 0.00000  | -0.00195 |
| 215 | H3  | PZ  | 0.00000  | 0.00000  | 0.00000  | -0.00083 | 0.00000  |
| 216 | H5  | S   | -0.00331 | -0.01623 | -0.01326 | 0.00154  | 0.01194  |
| 217 | H5  | S   | 1.05077  | -0.42321 | -0.29044 | -0.19845 | 0.06697  |
| 218 | H5  | PX  | -0.00182 | 0.00260  | 0.00292  | 0.00081  | -0.00272 |
| 219 | H5  | PY  | -0.00368 | 0.00107  | 0.00039  | 0.00103  | -0.00101 |
| 220 | H5  | PZ  | 0.00269  | -0.00005 | 0.00072  | -0.00102 | -0.00105 |
| 221 | H7  | S   | -0.00331 | -0.01623 | -0.01326 | -0.00154 | 0.01194  |
| 222 | H7  | S   | 1.05077  | -0.42321 | -0.29044 | 0.19845  | 0.06697  |
| 223 | H7  | PX  | -0.00182 | 0.00260  | 0.00292  | -0.00081 | -0.00272 |
| 224 | H7  | PY  | -0.00368 | 0.00107  | 0.00039  | -0.00103 | -0.00101 |
| 225 | H7  | PZ  | -0.00269 | 0.00005  | -0.00072 | -0.00102 | 0.00105  |

|              |         |         |         |         |         |
|--------------|---------|---------|---------|---------|---------|
| MO:          | 51      | 52      | 53      | 54      | 55      |
| Eigenvalues: | 0.30343 | 0.31075 | 0.31495 | 0.32001 | 0.32750 |
| (ev):        | 8.25679 | 8.45594 | 8.57019 | 8.70780 | 8.91174 |

|    |    |     |          |          |          |          |          |
|----|----|-----|----------|----------|----------|----------|----------|
|    |    | A   | A        | A        | A        | A        |          |
| 1  | H1 | S   | -0.00467 | -0.02783 | -0.03848 | 0.00000  | -0.04848 |
| 2  | H1 | S   | 0.26537  | -0.75614 | 0.07471  | 0.00000  | -0.88657 |
| 3  | H1 | PX  | -0.00169 | 0.00070  | -0.00318 | 0.00000  | -0.00135 |
| 4  | H1 | PY  | -0.00693 | -0.00008 | 0.00147  | 0.00000  | -0.00127 |
| 5  | H1 | PZ  | 0.00000  | 0.00000  | 0.00000  | -0.00586 | 0.00000  |
| 6  | C1 | S   | 0.00934  | -0.02912 | 0.01226  | 0.00000  | -0.03780 |
| 7  | C1 | S   | -0.02252 | 0.01516  | -0.02113 | 0.00000  | 0.03436  |
| 8  | C1 | PX  | 0.00409  | 0.08723  | -0.00936 | 0.00000  | 0.08843  |
| 9  | C1 | PY  | 0.00966  | -0.01104 | -0.00592 | 0.00000  | 0.04089  |
| 10 | C1 | PZ  | 0.00000  | 0.00000  | 0.00000  | 0.07258  | 0.00000  |
| 11 | C1 | S   | -0.23505 | 0.59110  | -0.22465 | 0.00000  | 0.48640  |
| 12 | C1 | PX  | -0.03381 | 0.40995  | -0.04719 | 0.00000  | 0.45332  |
| 13 | C1 | PY  | -0.32498 | 0.15931  | -0.13183 | 0.00000  | 0.16536  |
| 14 | C1 | PZ  | 0.00000  | 0.00000  | 0.00000  | -0.05990 | 0.00000  |
| 15 | C1 | DXX | 0.00057  | -0.00918 | -0.01193 | 0.00000  | -0.01437 |
| 16 | C1 | DYY | -0.00766 | -0.00295 | 0.00292  | 0.00000  | 0.00662  |



|    |    |     |          |          |          |          |          |
|----|----|-----|----------|----------|----------|----------|----------|
| 17 | C1 | DZZ | 0.00062  | 0.00178  | 0.00326  | 0.00000  | -0.00262 |
| 18 | C1 | DXY | -0.01070 | -0.00156 | -0.00209 | 0.00000  | -0.00717 |
| 19 | C1 | DXZ | 0.00000  | 0.00000  | 0.00000  | -0.01150 | 0.00000  |
| 20 | C1 | DYZ | 0.00000  | 0.00000  | 0.00000  | 0.00257  | 0.00000  |
| 21 | C2 | S   | -0.00026 | 0.02448  | -0.03172 | 0.00000  | 0.04951  |
| 22 | C2 | S   | 0.00736  | -0.02237 | 0.06933  | 0.00000  | -0.06261 |
| 23 | C2 | PX  | -0.00153 | 0.08678  | 0.01159  | 0.00000  | 0.13473  |
| 24 | C2 | PY  | -0.00393 | 0.05952  | 0.01382  | 0.00000  | 0.00780  |
| 25 | C2 | PZ  | 0.00000  | 0.00000  | 0.00000  | 0.01158  | 0.00000  |
| 26 | C2 | S   | -0.05539 | -0.53634 | 0.32967  | 0.00000  | -0.71272 |
| 27 | C2 | PX  | -0.09959 | 0.46174  | -0.36177 | 0.00000  | 0.98315  |
| 28 | C2 | PY  | 0.08800  | 0.24381  | 0.01640  | 0.00000  | -0.05734 |
| 29 | C2 | PZ  | 0.00000  | 0.00000  | 0.00000  | 0.06748  | 0.00000  |
| 30 | C2 | DXX | 0.00340  | -0.00090 | 0.00220  | 0.00000  | -0.00244 |
| 31 | C2 | DYY | -0.00464 | 0.00163  | -0.00515 | 0.00000  | 0.00528  |
| 32 | C2 | DZZ | 0.00116  | 0.00095  | 0.00270  | 0.00000  | 0.00253  |
| 33 | C2 | DXY | -0.00362 | -0.00032 | 0.00236  | 0.00000  | 0.00130  |
| 34 | C2 | DXZ | 0.00000  | 0.00000  | 0.00000  | 0.00015  | 0.00000  |
| 35 | C2 | DYZ | 0.00000  | 0.00000  | 0.00000  | -0.00388 | 0.00000  |
| 36 | C3 | S   | 0.01435  | -0.00064 | -0.00750 | 0.00000  | -0.00037 |
| 37 | C3 | S   | -0.01617 | -0.02716 | 0.05087  | 0.00000  | 0.00202  |
| 38 | C3 | PX  | 0.04178  | -0.00554 | 0.01624  | 0.00000  | 0.04334  |
| 39 | C3 | PY  | -0.01582 | 0.00047  | -0.00541 | 0.00000  | -0.02191 |
| 40 | C3 | PZ  | 0.00000  | 0.00000  | 0.00000  | -0.05935 | 0.00000  |
| 41 | C3 | S   | -0.30941 | 0.34857  | -0.67024 | 0.00000  | -0.02177 |
| 42 | C3 | PX  | 0.18064  | -0.30051 | 0.14735  | 0.00000  | 0.08548  |
| 43 | C3 | PY  | -0.17161 | -0.01655 | 0.38559  | 0.00000  | 0.08671  |
| 44 | C3 | PZ  | 0.00000  | 0.00000  | 0.00000  | -0.06076 | 0.00000  |
| 45 | C3 | DXX | 0.00901  | -0.00131 | -0.00413 | 0.00000  | 0.00297  |
| 46 | C3 | DYY | -0.01219 | 0.00758  | -0.00455 | 0.00000  | -0.00208 |
| 47 | C3 | DZZ | 0.00061  | -0.00256 | 0.00288  | 0.00000  | -0.00122 |
| 48 | C3 | DXY | 0.00112  | 0.00646  | 0.00936  | 0.00000  | 0.00985  |
| 49 | C3 | DXZ | 0.00000  | 0.00000  | 0.00000  | 0.00318  | 0.00000  |
| 50 | C3 | DYZ | 0.00000  | 0.00000  | 0.00000  | 0.00303  | 0.00000  |
| 51 | C4 | S   | -0.03384 | -0.01300 | -0.02054 | 0.00000  | 0.02250  |
| 52 | C4 | S   | 0.03910  | -0.02604 | 0.02652  | 0.00000  | -0.05333 |
| 53 | C4 | PX  | 0.00642  | -0.00674 | -0.00297 | 0.00000  | 0.08417  |
| 54 | C4 | PY  | 0.00218  | 0.09694  | 0.06546  | 0.00000  | 0.02855  |
| 55 | C4 | PZ  | 0.00000  | 0.00000  | 0.00000  | 0.10029  | 0.00000  |
| 56 | C4 | S   | 0.43241  | 0.32887  | 0.12399  | 0.00000  | 0.07629  |
| 57 | C4 | PX  | 0.22837  | -0.13579 | 0.21081  | 0.00000  | 0.04347  |
| 58 | C4 | PY  | 0.01798  | 0.20112  | 0.37996  | 0.00000  | -0.12481 |
| 59 | C4 | PZ  | 0.00000  | 0.00000  | 0.00000  | 0.15399  | 0.00000  |
| 60 | C4 | DXX | -0.00989 | -0.00237 | -0.00138 | 0.00000  | 0.01684  |
| 61 | C4 | DYY | -0.00533 | -0.01013 | -0.00452 | 0.00000  | -0.01172 |
| 62 | C4 | DZZ | 0.00110  | 0.00153  | 0.00513  | 0.00000  | -0.00217 |
| 63 | C4 | DXY | -0.00582 | -0.00147 | -0.00844 | 0.00000  | 0.00681  |
| 64 | C4 | DXZ | 0.00000  | 0.00000  | 0.00000  | 0.00505  | 0.00000  |
| 65 | C4 | DYZ | 0.00000  | 0.00000  | 0.00000  | -0.01407 | 0.00000  |
| 66 | C5 | S   | 0.01232  | 0.01145  | 0.04184  | 0.00000  | -0.06736 |
| 67 | C5 | S   | -0.03371 | -0.00149 | -0.06707 | 0.00000  | 0.09619  |
| 68 | C5 | PX  | -0.03056 | 0.02801  | 0.03270  | 0.00000  | -0.00781 |
| 69 | C5 | PY  | 0.01192  | -0.05532 | -0.06175 | 0.00000  | 0.07594  |
| 70 | C5 | PZ  | 0.00000  | 0.00000  | 0.00000  | -0.03169 | 0.00000  |

|     |    |     |          |          |          |          |          |
|-----|----|-----|----------|----------|----------|----------|----------|
| 71  | C5 | S   | -0.03587 | -0.45718 | -0.42662 | 0.00000  | 0.88318  |
| 72  | C5 | PX  | -0.00667 | -0.01465 | 0.52124  | 0.00000  | -0.58837 |
| 73  | C5 | PY  | 0.00485  | -0.19843 | -0.25667 | 0.00000  | 0.41663  |
| 74  | C5 | PZ  | 0.00000  | 0.00000  | 0.00000  | -0.10713 | 0.00000  |
| 75  | C5 | DXX | 0.00533  | -0.00771 | -0.00614 | 0.00000  | -0.00815 |
| 76  | C5 | DYY | -0.00258 | 0.00277  | 0.00767  | 0.00000  | 0.00146  |
| 77  | C5 | DZZ | -0.00193 | 0.00227  | 0.00029  | 0.00000  | 0.00060  |
| 78  | C5 | DXY | 0.00180  | 0.00445  | 0.00963  | 0.00000  | -0.01144 |
| 79  | C5 | DXZ | 0.00000  | 0.00000  | 0.00000  | 0.00580  | 0.00000  |
| 80  | C5 | DYZ | 0.00000  | 0.00000  | 0.00000  | -0.00133 | 0.00000  |
| 81  | C6 | S   | -0.01848 | -0.00044 | 0.01543  | 0.00000  | -0.00319 |
| 82  | C6 | S   | 0.02313  | 0.01973  | -0.04779 | 0.00000  | 0.00813  |
| 83  | C6 | PX  | 0.04501  | -0.01932 | 0.02959  | 0.00000  | 0.02071  |
| 84  | C6 | PY  | 0.03354  | 0.00360  | 0.01761  | 0.00000  | 0.05130  |
| 85  | C6 | PZ  | 0.00000  | 0.00000  | 0.00000  | 0.00305  | 0.00000  |
| 86  | C6 | S   | 0.38781  | -0.19904 | 0.24991  | 0.00000  | -0.23927 |
| 87  | C6 | PX  | 0.12346  | -0.33843 | 0.17007  | 0.00000  | 0.10678  |
| 88  | C6 | PY  | 0.14168  | -0.26389 | 0.08529  | 0.00000  | -0.17563 |
| 89  | C6 | PZ  | 0.00000  | 0.00000  | 0.00000  | -0.01107 | 0.00000  |
| 90  | C6 | DXX | -0.00408 | -0.00355 | 0.00759  | 0.00000  | -0.00101 |
| 91  | C6 | DYY | 0.00699  | 0.00122  | 0.00640  | 0.00000  | -0.00325 |
| 92  | C6 | DZZ | 0.00086  | 0.00197  | -0.00363 | 0.00000  | 0.00083  |
| 93  | C6 | DXY | -0.00596 | 0.00307  | -0.00793 | 0.00000  | -0.00394 |
| 94  | C6 | DXZ | 0.00000  | 0.00000  | 0.00000  | -0.00661 | 0.00000  |
| 95  | C6 | DYZ | 0.00000  | 0.00000  | 0.00000  | -0.00243 | 0.00000  |
| 96  | C7 | S   | 0.00235  | -0.00525 | 0.06047  | 0.00000  | 0.05456  |
| 97  | C7 | S   | -0.02271 | 0.03303  | -0.11854 | 0.00000  | -0.07202 |
| 98  | C7 | PX  | 0.06397  | -0.05109 | -0.10726 | 0.00000  | -0.08038 |
| 99  | C7 | PY  | 0.02991  | -0.05293 | 0.03927  | 0.00000  | 0.03554  |
| 100 | C7 | PZ  | 0.00000  | 0.00000  | 0.00000  | 0.05195  | 0.00000  |
| 101 | C7 | S   | 0.08644  | -0.18843 | -0.48964 | 0.00000  | -0.75765 |
| 102 | C7 | PX  | 0.30663  | -0.09239 | -0.99134 | 0.00000  | -0.50232 |
| 103 | C7 | PY  | -0.00570 | 0.02841  | 0.30980  | 0.00000  | 0.09398  |
| 104 | C7 | PZ  | 0.00000  | 0.00000  | 0.00000  | 0.10915  | 0.00000  |
| 105 | C7 | DXX | -0.01107 | 0.00750  | 0.00345  | 0.00000  | 0.00290  |
| 106 | C7 | DYY | 0.01232  | -0.01089 | 0.01158  | 0.00000  | 0.00665  |
| 107 | C7 | DZZ | -0.00315 | 0.00386  | -0.00745 | 0.00000  | -0.00216 |
| 108 | C7 | DXY | 0.00211  | -0.00134 | 0.00264  | 0.00000  | 0.00365  |
| 109 | C7 | DXZ | 0.00000  | 0.00000  | 0.00000  | 0.00513  | 0.00000  |
| 110 | C7 | DYZ | 0.00000  | 0.00000  | 0.00000  | -0.00230 | 0.00000  |
| 111 | O1 | S   | -0.00086 | 0.04323  | 0.07180  | 0.00000  | -0.03196 |
| 112 | O1 | S   | 0.00775  | -0.03756 | -0.06026 | 0.00000  | 0.02165  |
| 113 | O1 | PX  | 0.05660  | -0.04120 | -0.11936 | 0.00000  | 0.05243  |
| 114 | O1 | PY  | 0.01156  | -0.00684 | -0.01998 | 0.00000  | 0.06383  |
| 115 | O1 | PZ  | 0.00000  | 0.00000  | 0.00000  | -0.11176 | 0.00000  |
| 116 | O1 | S   | 0.00016  | -0.67365 | -1.13329 | 0.00000  | 0.51144  |
| 117 | O1 | PX  | 0.13016  | -0.14289 | -0.43076 | 0.00000  | 0.21801  |
| 118 | O1 | PY  | -0.03764 | -0.06522 | -0.02882 | 0.00000  | 0.10914  |
| 119 | O1 | PZ  | 0.00000  | 0.00000  | 0.00000  | -0.29008 | 0.00000  |
| 120 | O1 | DXX | -0.00375 | 0.00701  | 0.02176  | 0.00000  | -0.01341 |
| 121 | O1 | DYY | 0.00915  | 0.02135  | 0.02772  | 0.00000  | -0.01441 |
| 122 | O1 | DZZ | 0.00600  | 0.02537  | 0.03568  | 0.00000  | -0.01585 |
| 123 | O1 | DXY | 0.00877  | -0.00069 | -0.00028 | 0.00000  | -0.00535 |
| 124 | O1 | DXZ | 0.00000  | 0.00000  | 0.00000  | 0.00169  | 0.00000  |

|     |     |     |          |          |          |          |          |
|-----|-----|-----|----------|----------|----------|----------|----------|
| 125 | O1  | DYZ | 0.00000  | 0.00000  | 0.00000  | 0.01031  | 0.00000  |
| 126 | H4  | S   | 0.00808  | -0.01497 | -0.01429 | 0.00000  | 0.00047  |
| 127 | H4  | S   | 0.01583  | 0.33830  | 0.79367  | 0.00000  | -1.12102 |
| 128 | H4  | PX  | -0.00275 | 0.00349  | 0.00436  | 0.00000  | -0.00059 |
| 129 | H4  | PY  | -0.00229 | -0.00017 | 0.00017  | 0.00000  | 0.00449  |
| 130 | H4  | PZ  | 0.00000  | 0.00000  | 0.00000  | -0.00253 | 0.00000  |
| 131 | N1  | S   | -0.00973 | 0.01555  | -0.01570 | 0.00000  | 0.00294  |
| 132 | N1  | S   | 0.03566  | -0.04092 | 0.02702  | 0.00000  | -0.01034 |
| 133 | N1  | PX  | 0.05896  | -0.06785 | -0.01109 | 0.00000  | 0.00871  |
| 134 | N1  | PY  | -0.02658 | 0.03072  | -0.02390 | 0.00000  | -0.02068 |
| 135 | N1  | PZ  | 0.00000  | 0.00000  | 0.00000  | 0.01752  | 0.00000  |
| 136 | N1  | S   | -0.01286 | -0.12631 | 0.19796  | 0.00000  | -0.10162 |
| 137 | N1  | PX  | 0.00915  | 0.01884  | 0.01370  | 0.00000  | -0.09563 |
| 138 | N1  | PY  | -0.05007 | -0.06565 | -0.02393 | 0.00000  | -0.01046 |
| 139 | N1  | PZ  | 0.00000  | 0.00000  | 0.00000  | 0.04109  | 0.00000  |
| 140 | N1  | DXX | -0.00286 | 0.00406  | 0.00561  | 0.00000  | 0.00276  |
| 141 | N1  | DYY | -0.00239 | 0.00007  | -0.01382 | 0.00000  | -0.01037 |
| 142 | N1  | DZZ | 0.00557  | -0.00271 | 0.00028  | 0.00000  | -0.00055 |
| 143 | N1  | DXY | 0.00880  | -0.00788 | 0.00708  | 0.00000  | 0.00425  |
| 144 | N1  | DXZ | 0.00000  | 0.00000  | 0.00000  | -0.00284 | 0.00000  |
| 145 | N1  | DYZ | 0.00000  | 0.00000  | 0.00000  | 0.00254  | 0.00000  |
| 146 | H6  | S   | 0.00340  | -0.00459 | -0.00915 | 0.00000  | 0.01186  |
| 147 | H6  | S   | -0.03265 | 0.79117  | -0.43356 | 0.00000  | 1.36405  |
| 148 | H6  | PX  | -0.00064 | 0.00277  | -0.00202 | 0.00000  | 0.00460  |
| 149 | H6  | PY  | 0.00165  | 0.00091  | -0.00055 | 0.00000  | 0.00001  |
| 150 | H6  | PZ  | 0.00000  | 0.00000  | 0.00000  | 0.00067  | 0.00000  |
| 151 | C8  | S   | 0.00182  | -0.00246 | -0.00834 | 0.00000  | -0.01252 |
| 152 | C8  | S   | -0.01423 | 0.01081  | 0.01809  | 0.00000  | 0.02019  |
| 153 | C8  | PX  | 0.08544  | -0.08901 | 0.08547  | 0.00000  | 0.03502  |
| 154 | C8  | PY  | -0.00543 | -0.00168 | 0.07590  | 0.00000  | 0.06448  |
| 155 | C8  | PZ  | 0.00000  | 0.00000  | 0.00000  | -0.04664 | 0.00000  |
| 156 | C8  | S   | 0.07929  | -0.03710 | -0.04664 | 0.00000  | 0.10893  |
| 157 | C8  | PX  | -0.10378 | 0.23776  | 0.09784  | 0.00000  | -0.04646 |
| 158 | C8  | PY  | 0.01019  | 0.12725  | -0.22820 | 0.00000  | 0.02148  |
| 159 | C8  | PZ  | 0.00000  | 0.00000  | 0.00000  | -0.10522 | 0.00000  |
| 160 | C8  | DXX | 0.01542  | -0.01720 | -0.00304 | 0.00000  | -0.00032 |
| 161 | C8  | DYY | -0.01049 | 0.01164  | -0.00110 | 0.00000  | -0.00004 |
| 162 | C8  | DZZ | -0.00277 | 0.00280  | 0.00085  | 0.00000  | 0.00091  |
| 163 | C8  | DXY | -0.01520 | 0.02117  | -0.01865 | 0.00000  | -0.01425 |
| 164 | C8  | DXZ | 0.00000  | 0.00000  | 0.00000  | 0.00245  | 0.00000  |
| 165 | C8  | DYZ | 0.00000  | 0.00000  | 0.00000  | 0.00115  | 0.00000  |
| 166 | H8  | S   | -0.03123 | 0.02199  | 0.01337  | 0.00000  | 0.02118  |
| 167 | H8  | S   | -0.41093 | 0.22138  | 1.41897  | 0.00000  | 1.01991  |
| 168 | H8  | PX  | 0.00016  | -0.00039 | -0.00199 | 0.00000  | -0.00045 |
| 169 | H8  | PY  | 0.00249  | -0.00429 | 0.00359  | 0.00000  | 0.00224  |
| 170 | H8  | PZ  | 0.00000  | 0.00000  | 0.00000  | 0.00371  | 0.00000  |
| 171 | C10 | S   | 0.03012  | -0.02285 | -0.03237 | 0.00000  | -0.02018 |
| 172 | C10 | S   | -0.03611 | 0.02612  | 0.03770  | 0.00000  | 0.01914  |
| 173 | C10 | PX  | 0.13513  | -0.18803 | 0.13826  | 0.00000  | 0.09905  |
| 174 | C10 | PY  | 0.07012  | -0.07205 | -0.02233 | 0.00000  | -0.01424 |
| 175 | C10 | PZ  | 0.00000  | 0.00000  | 0.00000  | 0.01260  | 0.00000  |
| 176 | C10 | S   | -0.47744 | 0.43288  | 0.34659  | 0.00000  | 0.31635  |
| 177 | C10 | PX  | 0.69617  | -1.00561 | 0.69341  | 0.00000  | 0.50356  |
| 178 | C10 | PY  | 0.31519  | -0.30749 | -0.08371 | 0.00000  | 0.01305  |

|     |     |     |          |          |          |          |          |
|-----|-----|-----|----------|----------|----------|----------|----------|
| 179 | C10 | PZ  | 0.00000  | 0.00000  | 0.00000  | 0.06870  | 0.00000  |
| 180 | C10 | DXX | -0.00074 | 0.00219  | -0.00757 | 0.00000  | -0.00538 |
| 181 | C10 | DYY | 0.00344  | -0.00337 | 0.00022  | 0.00000  | -0.00017 |
| 182 | C10 | DZZ | 0.00084  | -0.00066 | -0.00067 | 0.00000  | -0.00011 |
| 183 | C10 | DXY | 0.00920  | -0.01107 | 0.00919  | 0.00000  | 0.00604  |
| 184 | C10 | DXZ | 0.00000  | 0.00000  | 0.00000  | 0.00146  | 0.00000  |
| 185 | C10 | DYZ | 0.00000  | 0.00000  | 0.00000  | -0.00368 | 0.00000  |
| 186 | H16 | S   | -0.01216 | 0.01750  | -0.03625 | 0.00000  | -0.02501 |
| 187 | H16 | S   | -0.44276 | 0.81765  | -1.08089 | 0.00000  | -0.74860 |
| 188 | H16 | PX  | 0.00277  | -0.00346 | 0.00088  | 0.00000  | 0.00063  |
| 189 | H16 | PY  | 0.00122  | -0.00128 | 0.00142  | 0.00000  | 0.00125  |
| 190 | H16 | PZ  | 0.00000  | 0.00000  | 0.00000  | 0.00119  | 0.00000  |
| 191 | H18 | S   | 0.02726  | -0.02938 | 0.01932  | 0.00000  | 0.01237  |
| 192 | H18 | S   | 1.14026  | -1.35200 | 0.36500  | 0.00000  | 0.30606  |
| 193 | H18 | PX  | 0.00183  | -0.00289 | 0.00387  | 0.00000  | 0.00293  |
| 194 | H18 | PY  | 0.00172  | -0.00196 | 0.00012  | 0.00000  | -0.00029 |
| 195 | H18 | PZ  | 0.00000  | 0.00000  | 0.00000  | 0.00088  | 0.00000  |
| 196 | C9  | S   | -0.00252 | -0.01053 | -0.04933 | 0.00000  | 0.05010  |
| 197 | C9  | S   | 0.01139  | 0.00573  | 0.04870  | 0.00000  | -0.05856 |
| 198 | C9  | PX  | -0.09592 | -0.13991 | -0.10398 | 0.00000  | 0.07226  |
| 199 | C9  | PY  | 0.25929  | 0.10619  | -0.08105 | 0.00000  | 0.00093  |
| 200 | C9  | PZ  | 0.00000  | 0.00000  | 0.00000  | 0.35397  | 0.00000  |
| 201 | C9  | S   | 0.10505  | 0.11501  | 0.78685  | 0.00000  | -0.85523 |
| 202 | C9  | PX  | -0.37029 | -0.81416 | -0.69389 | 0.00000  | 0.30449  |
| 203 | C9  | PY  | 1.17120  | 0.49082  | -0.34613 | 0.00000  | 0.11343  |
| 204 | C9  | PZ  | 0.00000  | 0.00000  | 0.00000  | 1.49800  | 0.00000  |
| 205 | C9  | DXX | 0.00455  | -0.00129 | -0.00372 | 0.00000  | 0.00368  |
| 206 | C9  | DYY | -0.00809 | -0.00284 | 0.00802  | 0.00000  | -0.00863 |
| 207 | C9  | DZZ | 0.00441  | 0.01198  | 0.00994  | 0.00000  | -0.00130 |
| 208 | C9  | DXY | 0.00431  | 0.00034  | -0.00859 | 0.00000  | 0.00699  |
| 209 | C9  | DXZ | 0.00000  | 0.00000  | 0.00000  | -0.00090 | 0.00000  |
| 210 | C9  | DYZ | 0.00000  | 0.00000  | 0.00000  | 0.00821  | 0.00000  |
| 211 | H3  | S   | -0.04890 | -0.03196 | 0.02027  | 0.00000  | -0.03633 |
| 212 | H3  | S   | -1.65992 | -0.93690 | -0.09336 | 0.00000  | 0.33069  |
| 213 | H3  | PX  | 0.00073  | -0.00173 | -0.00502 | 0.00000  | 0.00323  |
| 214 | H3  | PY  | 0.00587  | 0.00390  | 0.00150  | 0.00000  | -0.00055 |
| 215 | H3  | PZ  | 0.00000  | 0.00000  | 0.00000  | 0.00886  | 0.00000  |
| 216 | H5  | S   | 0.01780  | 0.03698  | 0.02573  | 0.03442  | 0.00253  |
| 217 | H5  | S   | 0.64376  | 0.62127  | -0.11680 | 1.65672  | 0.25596  |
| 218 | H5  | PX  | -0.00230 | -0.00594 | -0.00329 | -0.00149 | 0.00025  |
| 219 | H5  | PY  | 0.00471  | 0.00310  | -0.00433 | -0.00294 | 0.00463  |
| 220 | H5  | PZ  | -0.00005 | -0.00189 | -0.00183 | 0.00625  | 0.00028  |
| 221 | H7  | S   | 0.01780  | 0.03698  | 0.02573  | -0.03442 | 0.00253  |
| 222 | H7  | S   | 0.64376  | 0.62127  | -0.11680 | -1.65672 | 0.25596  |
| 223 | H7  | PX  | -0.00230 | -0.00594 | -0.00329 | 0.00149  | 0.00025  |
| 224 | H7  | PY  | 0.00471  | 0.00310  | -0.00433 | 0.00294  | 0.00463  |
| 225 | H7  | PZ  | 0.00005  | 0.00189  | 0.00183  | 0.00625  | -0.00028 |

|              |         |          |          |          |          |
|--------------|---------|----------|----------|----------|----------|
| MO:          | 56      | 57       | 58       | 59       | 60       |
| Eigenvalues: | 0.34257 | 0.38340  | 0.40188  | 0.43117  | 0.43713  |
| (ev):        | 9.32173 | 10.43278 | 10.93575 | 11.73272 | 11.89486 |

|      |   |         |         |          |         |         |
|------|---|---------|---------|----------|---------|---------|
|      | A | A       | A       | A        | A       |         |
| 1 H1 | S | 0.00671 | 0.00000 | -0.06753 | 0.05645 | 0.05346 |

|    |    |     |          |          |          |          |          |
|----|----|-----|----------|----------|----------|----------|----------|
| 2  | H1 | S   | -1.28388 | 0.00000  | -0.55255 | -0.27599 | -0.72249 |
| 3  | H1 | PX  | 0.00563  | 0.00000  | -0.00152 | 0.00879  | 0.00623  |
| 4  | H1 | PY  | -0.00244 | 0.00000  | -0.00544 | -0.00791 | 0.00193  |
| 5  | H1 | PZ  | 0.00000  | -0.01587 | 0.00000  | 0.00000  | 0.00000  |
| 6  | C1 | S   | -0.04912 | 0.00000  | 0.01491  | -0.02798 | -0.04996 |
| 7  | C1 | S   | 0.07957  | 0.00000  | -0.05400 | 0.06888  | 0.01839  |
| 8  | C1 | PX  | 0.14604  | 0.00000  | 0.08031  | 0.00672  | 0.03089  |
| 9  | C1 | PY  | -0.01368 | 0.00000  | 0.02674  | -0.12945 | -0.03671 |
| 10 | C1 | PZ  | 0.00000  | -0.20358 | 0.00000  | 0.00000  | 0.00000  |
| 11 | C1 | S   | 0.76353  | 0.00000  | -0.23067 | 0.46137  | 1.22731  |
| 12 | C1 | PX  | 0.73712  | 0.00000  | 0.96305  | 0.22601  | 0.39842  |
| 13 | C1 | PY  | 0.29545  | 0.00000  | -1.15381 | 0.14930  | -0.05196 |
| 14 | C1 | PZ  | 0.00000  | -0.66158 | 0.00000  | 0.00000  | 0.00000  |
| 15 | C1 | DXX | 0.01065  | 0.00000  | -0.01233 | 0.02607  | 0.02156  |
| 16 | C1 | DYY | -0.01190 | 0.00000  | 0.00200  | -0.02922 | -0.02132 |
| 17 | C1 | DZZ | 0.00329  | 0.00000  | -0.00113 | 0.00767  | -0.00294 |
| 18 | C1 | DXY | -0.00061 | 0.00000  | -0.02379 | 0.00366  | 0.01742  |
| 19 | C1 | DXZ | 0.00000  | -0.02089 | 0.00000  | 0.00000  | 0.00000  |
| 20 | C1 | DYZ | 0.00000  | -0.00947 | 0.00000  | 0.00000  | 0.00000  |
| 21 | C2 | S   | -0.05195 | 0.00000  | 0.01755  | 0.03906  | 0.03134  |
| 22 | C2 | S   | 0.08340  | 0.00000  | -0.01232 | -0.00821 | -0.04726 |
| 23 | C2 | PX  | -0.06179 | 0.00000  | -0.08988 | -0.00287 | -0.06792 |
| 24 | C2 | PY  | -0.07166 | 0.00000  | 0.05338  | -0.00449 | 0.01292  |
| 25 | C2 | PZ  | 0.00000  | 0.19839  | 0.00000  | 0.00000  | 0.00000  |
| 26 | C2 | S   | 0.62107  | 0.00000  | -0.40399 | -1.28135 | -0.72267 |
| 27 | C2 | PX  | -0.84029 | 0.00000  | -0.68359 | -0.11847 | -0.07342 |
| 28 | C2 | PY  | -0.28830 | 0.00000  | 0.78303  | 0.88753  | -0.77940 |
| 29 | C2 | PZ  | 0.00000  | 0.63790  | 0.00000  | 0.00000  | 0.00000  |
| 30 | C2 | DXX | 0.00294  | 0.00000  | 0.01108  | -0.01007 | -0.01895 |
| 31 | C2 | DYY | -0.00813 | 0.00000  | -0.01263 | 0.00541  | 0.01622  |
| 32 | C2 | DZZ | 0.00207  | 0.00000  | 0.00065  | 0.00197  | -0.00161 |
| 33 | C2 | DXY | 0.01297  | 0.00000  | -0.01994 | -0.02940 | -0.00841 |
| 34 | C2 | DXZ | 0.00000  | -0.02006 | 0.00000  | 0.00000  | 0.00000  |
| 35 | C2 | DYZ | 0.00000  | -0.00041 | 0.00000  | 0.00000  | 0.00000  |
| 36 | C3 | S   | 0.00106  | 0.00000  | 0.05599  | 0.02933  | 0.03172  |
| 37 | C3 | S   | 0.00188  | 0.00000  | -0.07774 | -0.06614 | -0.04750 |
| 38 | C3 | PX  | -0.00519 | 0.00000  | 0.08758  | 0.04579  | -0.18314 |
| 39 | C3 | PY  | -0.09408 | 0.00000  | 0.03897  | -0.13845 | -0.04047 |
| 40 | C3 | PZ  | 0.00000  | 0.30802  | 0.00000  | 0.00000  | 0.00000  |
| 41 | C3 | S   | 0.11315  | 0.00000  | -1.67746 | 0.77700  | -0.95378 |
| 42 | C3 | PX  | -0.01997 | 0.00000  | -0.29406 | 0.39121  | -1.12370 |
| 43 | C3 | PY  | 0.11382  | 0.00000  | -0.25585 | -0.62175 | 0.12388  |
| 44 | C3 | PZ  | 0.00000  | 0.74766  | 0.00000  | 0.00000  | 0.00000  |
| 45 | C3 | DXX | -0.00882 | 0.00000  | 0.02978  | -0.01015 | -0.01460 |
| 46 | C3 | DYY | 0.01422  | 0.00000  | -0.04311 | 0.03257  | 0.00523  |
| 47 | C3 | DZZ | -0.00154 | 0.00000  | -0.00125 | -0.00718 | 0.00127  |
| 48 | C3 | DXY | 0.01567  | 0.00000  | 0.02250  | -0.00607 | -0.00376 |
| 49 | C3 | DXZ | 0.00000  | 0.01119  | 0.00000  | 0.00000  | 0.00000  |
| 50 | C3 | DYZ | 0.00000  | -0.00559 | 0.00000  | 0.00000  | 0.00000  |
| 51 | C4 | S   | 0.00914  | 0.00000  | -0.07733 | -0.04883 | 0.01756  |
| 52 | C4 | S   | -0.01604 | 0.00000  | 0.08618  | 0.05212  | -0.02875 |
| 53 | C4 | PX  | -0.03951 | 0.00000  | -0.02449 | -0.22215 | -0.13135 |
| 54 | C4 | PY  | -0.05360 | 0.00000  | -0.04395 | -0.09802 | -0.06614 |
| 55 | C4 | PZ  | 0.00000  | 0.26738  | 0.00000  | 0.00000  | 0.00000  |

|     |    |     |          |          |          |          |          |
|-----|----|-----|----------|----------|----------|----------|----------|
| 56  | C4 | S   | -0.16725 | 0.00000  | 1.99205  | 1.21439  | 0.07907  |
| 57  | C4 | PX  | -0.06087 | 0.00000  | 0.53103  | -1.27733 | -0.62829 |
| 58  | C4 | PY  | -0.02999 | 0.00000  | -0.25431 | -0.91970 | -0.11918 |
| 59  | C4 | PZ  | 0.00000  | 0.59937  | 0.00000  | 0.00000  | 0.00000  |
| 60  | C4 | DXX | -0.00461 | 0.00000  | 0.00746  | -0.01099 | -0.01549 |
| 61  | C4 | DYY | 0.00267  | 0.00000  | -0.00877 | 0.01029  | 0.02216  |
| 62  | C4 | DZZ | -0.00172 | 0.00000  | 0.00727  | 0.00077  | -0.00181 |
| 63  | C4 | DXY | 0.00688  | 0.00000  | -0.00746 | -0.01086 | -0.00262 |
| 64  | C4 | DXZ | 0.00000  | -0.00226 | 0.00000  | 0.00000  | 0.00000  |
| 65  | C4 | DYZ | 0.00000  | 0.00637  | 0.00000  | 0.00000  | 0.00000  |
| 66  | C5 | S   | 0.03401  | 0.00000  | 0.03687  | 0.04961  | -0.00701 |
| 67  | C5 | S   | -0.03326 | 0.00000  | -0.05860 | -0.01115 | 0.00367  |
| 68  | C5 | PX  | 0.14521  | 0.00000  | -0.04954 | -0.14403 | -0.05725 |
| 69  | C5 | PY  | -0.06413 | 0.00000  | 0.03626  | 0.01079  | -0.09407 |
| 70  | C5 | PZ  | 0.00000  | -0.19154 | 0.00000  | 0.00000  | 0.00000  |
| 71  | C5 | S   | -0.57219 | 0.00000  | -0.67258 | -1.64646 | 0.35518  |
| 72  | C5 | PX  | 0.80142  | 0.00000  | -0.07837 | -1.34242 | -0.47419 |
| 73  | C5 | PY  | -0.62623 | 0.00000  | 0.09741  | -0.17276 | -0.93968 |
| 74  | C5 | PZ  | 0.00000  | -0.58587 | 0.00000  | 0.00000  | 0.00000  |
| 75  | C5 | DXX | 0.00190  | 0.00000  | 0.01269  | 0.02130  | 0.01170  |
| 76  | C5 | DYY | 0.00148  | 0.00000  | -0.01571 | -0.02055 | -0.00644 |
| 77  | C5 | DZZ | 0.00295  | 0.00000  | -0.00182 | -0.00112 | -0.00431 |
| 78  | C5 | DXY | 0.00142  | 0.00000  | 0.01732  | 0.01103  | 0.00505  |
| 79  | C5 | DXZ | 0.00000  | 0.01055  | 0.00000  | 0.00000  | 0.00000  |
| 80  | C5 | DYZ | 0.00000  | -0.01070 | 0.00000  | 0.00000  | 0.00000  |
| 81  | C6 | S   | 0.01809  | 0.00000  | -0.08186 | -0.05079 | 0.00542  |
| 82  | C6 | S   | -0.02540 | 0.00000  | 0.10008  | 0.09287  | -0.05341 |
| 83  | C6 | PX  | 0.06516  | 0.00000  | 0.08743  | -0.13896 | -0.10589 |
| 84  | C6 | PY  | -0.06050 | 0.00000  | 0.15878  | 0.03885  | -0.02965 |
| 85  | C6 | PZ  | 0.00000  | -0.32688 | 0.00000  | 0.00000  | 0.00000  |
| 86  | C6 | S   | -0.04536 | 0.00000  | 1.45262  | 1.08715  | -0.34145 |
| 87  | C6 | PX  | 0.11487  | 0.00000  | -0.28276 | -0.93680 | -0.07443 |
| 88  | C6 | PY  | 0.11467  | 0.00000  | 0.53157  | 0.52225  | -0.60720 |
| 89  | C6 | PZ  | 0.00000  | -0.72723 | 0.00000  | 0.00000  | 0.00000  |
| 90  | C6 | DXX | 0.01329  | 0.00000  | -0.01263 | 0.00711  | 0.01046  |
| 91  | C6 | DYY | -0.00565 | 0.00000  | 0.00477  | -0.00516 | -0.02271 |
| 92  | C6 | DZZ | -0.00104 | 0.00000  | 0.00863  | 0.00780  | -0.00148 |
| 93  | C6 | DXY | -0.01567 | 0.00000  | -0.00110 | -0.01700 | 0.01425  |
| 94  | C6 | DXZ | 0.00000  | 0.00384  | 0.00000  | 0.00000  | 0.00000  |
| 95  | C6 | DYZ | 0.00000  | 0.00379  | 0.00000  | 0.00000  | 0.00000  |
| 96  | C7 | S   | 0.00326  | 0.00000  | 0.02851  | -0.02471 | -0.01947 |
| 97  | C7 | S   | -0.02107 | 0.00000  | -0.06004 | 0.06616  | 0.00674  |
| 98  | C7 | PX  | -0.02851 | 0.00000  | 0.03834  | -0.09123 | 0.02876  |
| 99  | C7 | PY  | -0.02239 | 0.00000  | -0.02232 | -0.00335 | 0.06833  |
| 100 | C7 | PZ  | 0.00000  | -0.05969 | 0.00000  | 0.00000  | 0.00000  |
| 101 | C7 | S   | 0.18263  | 0.00000  | -0.52008 | -0.28196 | 1.10671  |
| 102 | C7 | PX  | -0.31697 | 0.00000  | 0.18825  | 0.02676  | 0.03522  |
| 103 | C7 | PY  | -0.34842 | 0.00000  | 1.32622  | -1.09910 | 0.87839  |
| 104 | C7 | PZ  | 0.00000  | -0.40822 | 0.00000  | 0.00000  | 0.00000  |
| 105 | C7 | DXX | 0.01254  | 0.00000  | -0.01767 | 0.00133  | 0.03343  |
| 106 | C7 | DYY | -0.00138 | 0.00000  | 0.01871  | -0.00615 | -0.02646 |
| 107 | C7 | DZZ | -0.00486 | 0.00000  | -0.00448 | 0.00257  | 0.00123  |
| 108 | C7 | DXY | -0.00920 | 0.00000  | 0.01925  | -0.01009 | 0.00369  |
| 109 | C7 | DXZ | 0.00000  | -0.01291 | 0.00000  | 0.00000  | 0.00000  |

|     |    |     |          |          |          |          |          |
|-----|----|-----|----------|----------|----------|----------|----------|
| 110 | C7 | DYZ | 0.00000  | 0.02592  | 0.00000  | 0.00000  | 0.00000  |
| 111 | O1 | S   | -0.04524 | 0.00000  | 0.01174  | -0.00555 | -0.00582 |
| 112 | O1 | S   | 0.01644  | 0.00000  | -0.01792 | 0.00597  | 0.05016  |
| 113 | O1 | PX  | 0.14406  | 0.00000  | 0.02813  | -0.04134 | -0.03071 |
| 114 | O1 | PY  | 0.01949  | 0.00000  | 0.09940  | -0.06224 | -0.10969 |
| 115 | O1 | PZ  | 0.00000  | -0.07103 | 0.00000  | 0.00000  | 0.00000  |
| 116 | O1 | S   | 0.77098  | 0.00000  | -0.16646 | 0.17573  | -0.09420 |
| 117 | O1 | PX  | 0.38082  | 0.00000  | 0.03091  | 0.01353  | -0.07577 |
| 118 | O1 | PY  | 0.10125  | 0.00000  | 0.27858  | -0.24517 | -0.23644 |
| 119 | O1 | PZ  | 0.00000  | -0.15183 | 0.00000  | 0.00000  | 0.00000  |
| 120 | O1 | DXX | -0.01385 | 0.00000  | 0.00102  | -0.00569 | 0.00629  |
| 121 | O1 | DYY | -0.03491 | 0.00000  | -0.00283 | 0.00887  | 0.00612  |
| 122 | O1 | DZZ | -0.02873 | 0.00000  | 0.00621  | 0.00006  | 0.01445  |
| 123 | O1 | DXY | -0.00291 | 0.00000  | 0.00560  | 0.00849  | -0.00068 |
| 124 | O1 | DXZ | 0.00000  | -0.00313 | 0.00000  | 0.00000  | 0.00000  |
| 125 | O1 | DYZ | 0.00000  | -0.01517 | 0.00000  | 0.00000  | 0.00000  |
| 126 | H4 | S   | 0.01979  | 0.00000  | -0.03718 | -0.02317 | -0.00355 |
| 127 | H4 | S   | 1.38695  | 0.00000  | 0.04545  | -0.38728 | 0.23054  |
| 128 | H4 | PX  | 0.00284  | 0.00000  | -0.00564 | -0.00977 | -0.00094 |
| 129 | H4 | PY  | -0.00326 | 0.00000  | -0.01005 | -0.01152 | -0.00251 |
| 130 | H4 | PZ  | 0.00000  | -0.01287 | 0.00000  | 0.00000  | 0.00000  |
| 131 | N1 | S   | -0.01102 | 0.00000  | -0.00166 | 0.00739  | 0.07571  |
| 132 | N1 | S   | 0.01059  | 0.00000  | -0.03733 | -0.00941 | -0.09495 |
| 133 | N1 | PX  | -0.00351 | 0.00000  | -0.09141 | 0.05364  | -0.10242 |
| 134 | N1 | PY  | -0.03362 | 0.00000  | -0.04220 | -0.06118 | 0.03703  |
| 135 | N1 | PZ  | 0.00000  | 0.13848  | 0.00000  | 0.00000  | 0.00000  |
| 136 | N1 | S   | 0.20157  | 0.00000  | 0.40943  | -0.17547 | -1.53284 |
| 137 | N1 | PX  | 0.06822  | 0.00000  | 0.14894  | 0.23102  | -0.67484 |
| 138 | N1 | PY  | -0.00410 | 0.00000  | -0.22641 | -0.26196 | 0.17441  |
| 139 | N1 | PZ  | 0.00000  | 0.36123  | 0.00000  | 0.00000  | 0.00000  |
| 140 | N1 | DXX | -0.00223 | 0.00000  | -0.00489 | -0.00549 | 0.00849  |
| 141 | N1 | DYY | 0.00183  | 0.00000  | -0.01437 | 0.00949  | 0.00282  |
| 142 | N1 | DZZ | -0.00404 | 0.00000  | 0.00037  | 0.00068  | 0.01678  |
| 143 | N1 | DXY | 0.00696  | 0.00000  | 0.00240  | -0.00174 | -0.01156 |
| 144 | N1 | DXZ | 0.00000  | 0.00559  | 0.00000  | 0.00000  | 0.00000  |
| 145 | N1 | DYZ | 0.00000  | -0.02108 | 0.00000  | 0.00000  | 0.00000  |
| 146 | H6 | S   | 0.00555  | 0.00000  | -0.00226 | -0.06253 | -0.06302 |
| 147 | H6 | S   | -1.20794 | 0.00000  | -0.30437 | 0.39887  | -0.18278 |
| 148 | H6 | PX  | -0.00395 | 0.00000  | -0.00339 | 0.00267  | 0.00425  |
| 149 | H6 | PY  | -0.00411 | 0.00000  | 0.00925  | 0.01221  | -0.00095 |
| 150 | H6 | PZ  | 0.00000  | 0.01433  | 0.00000  | 0.00000  | 0.00000  |
| 151 | C8 | S   | 0.03307  | 0.00000  | -0.06385 | 0.07109  | -0.08020 |
| 152 | C8 | S   | -0.03017 | 0.00000  | 0.03498  | -0.07064 | 0.05562  |
| 153 | C8 | PX  | 0.00612  | 0.00000  | 0.14223  | -0.07633 | -0.14756 |
| 154 | C8 | PY  | -0.02278 | 0.00000  | 0.04779  | -0.00746 | -0.01862 |
| 155 | C8 | PZ  | 0.00000  | 0.00183  | 0.00000  | 0.00000  | 0.00000  |
| 156 | C8 | S   | -0.84729 | 0.00000  | 1.80359  | -2.42556 | 2.50362  |
| 157 | C8 | PX  | -0.19895 | 0.00000  | 1.24924  | -0.74681 | -0.82917 |
| 158 | C8 | PY  | -0.04479 | 0.00000  | -0.09370 | 0.93923  | -0.56754 |
| 159 | C8 | PZ  | 0.00000  | 0.01225  | 0.00000  | 0.00000  | 0.00000  |
| 160 | C8 | DXX | -0.00121 | 0.00000  | -0.01094 | 0.00486  | -0.01782 |
| 161 | C8 | DYY | -0.00040 | 0.00000  | 0.00450  | -0.01902 | 0.02921  |
| 162 | C8 | DZZ | 0.00022  | 0.00000  | -0.00150 | -0.00109 | 0.00438  |
| 163 | C8 | DXY | -0.00413 | 0.00000  | 0.01397  | 0.00771  | -0.00370 |

|     |     |     |          |          |          |          |          |
|-----|-----|-----|----------|----------|----------|----------|----------|
| 164 | C8  | DXZ | 0.00000  | -0.02041 | 0.00000  | 0.00000  | 0.00000  |
| 165 | C8  | DYZ | 0.00000  | -0.00471 | 0.00000  | 0.00000  | 0.00000  |
| 166 | H8  | S   | 0.03269  | 0.00000  | -0.05806 | -0.00471 | 0.10550  |
| 167 | H8  | S   | 0.27638  | 0.00000  | 0.05962  | 0.03589  | -0.22852 |
| 168 | H8  | PX  | 0.00256  | 0.00000  | -0.00382 | -0.00022 | 0.00897  |
| 169 | H8  | PY  | -0.00361 | 0.00000  | 0.00536  | -0.00411 | 0.00659  |
| 170 | H8  | PZ  | 0.00000  | -0.00744 | 0.00000  | 0.00000  | 0.00000  |
| 171 | C10 | S   | -0.02545 | 0.00000  | 0.02968  | -0.04443 | 0.04449  |
| 172 | C10 | S   | 0.01653  | 0.00000  | -0.00211 | -0.03220 | 0.01769  |
| 173 | C10 | PX  | 0.00878  | 0.00000  | -0.05248 | 0.04258  | 0.11738  |
| 174 | C10 | PY  | -0.01191 | 0.00000  | -0.02170 | -0.02955 | 0.09225  |
| 175 | C10 | PZ  | 0.00000  | 0.00777  | 0.00000  | 0.00000  | 0.00000  |
| 176 | C10 | S   | 0.54677  | 0.00000  | -0.98231 | 1.87753  | -1.46032 |
| 177 | C10 | PX  | 0.10742  | 0.00000  | -0.65684 | 0.14316  | 0.97466  |
| 178 | C10 | PY  | 0.17769  | 0.00000  | -0.82302 | 1.30135  | -0.75803 |
| 179 | C10 | PZ  | 0.00000  | -0.00267 | 0.00000  | 0.00000  | 0.00000  |
| 180 | C10 | DXX | 0.00100  | 0.00000  | -0.00952 | 0.01535  | -0.00282 |
| 181 | C10 | DYY | 0.00031  | 0.00000  | 0.00398  | -0.00082 | -0.01286 |
| 182 | C10 | DZZ | -0.00364 | 0.00000  | 0.00568  | -0.01297 | 0.01453  |
| 183 | C10 | DXY | 0.00267  | 0.00000  | 0.00060  | -0.00209 | -0.03097 |
| 184 | C10 | DXZ | 0.00000  | -0.00718 | 0.00000  | 0.00000  | 0.00000  |
| 185 | C10 | DYZ | 0.00000  | -0.00160 | 0.00000  | 0.00000  | 0.00000  |
| 186 | H16 | S   | -0.00833 | 0.00000  | -0.01359 | 0.03327  | 0.05547  |
| 187 | H16 | S   | -0.28533 | 0.00000  | 0.64343  | -0.39870 | -0.50793 |
| 188 | H16 | PX  | 0.00057  | 0.00000  | -0.00465 | 0.00363  | 0.00170  |
| 189 | H16 | PY  | 0.00085  | 0.00000  | -0.00196 | 0.00381  | -0.01337 |
| 190 | H16 | PZ  | 0.00000  | -0.00100 | 0.00000  | 0.00000  | 0.00000  |
| 191 | H18 | S   | 0.00538  | 0.00000  | -0.01133 | 0.02033  | -0.10435 |
| 192 | H18 | S   | -0.07874 | 0.00000  | -0.54740 | 0.25181  | 0.81432  |
| 193 | H18 | PX  | 0.00009  | 0.00000  | 0.00015  | -0.00189 | 0.00088  |
| 194 | H18 | PY  | 0.00071  | 0.00000  | -0.00484 | 0.00476  | 0.00495  |
| 195 | H18 | PZ  | 0.00000  | 0.00177  | 0.00000  | 0.00000  | 0.00000  |
| 196 | C9  | S   | 0.06629  | 0.00000  | 0.01687  | -0.01121 | -0.00426 |
| 197 | C9  | S   | -0.04674 | 0.00000  | -0.00452 | 0.02809  | 0.00447  |
| 198 | C9  | PX  | 0.06224  | 0.00000  | 0.05777  | -0.02749 | -0.01684 |
| 199 | C9  | PY  | 0.00726  | 0.00000  | -0.11001 | -0.09268 | -0.05151 |
| 200 | C9  | PZ  | 0.00000  | -0.00915 | 0.00000  | 0.00000  | 0.00000  |
| 201 | C9  | S   | -1.23005 | 0.00000  | -0.41039 | -0.02981 | -0.01542 |
| 202 | C9  | PX  | 0.43694  | 0.00000  | 0.17282  | -0.24373 | -0.34350 |
| 203 | C9  | PY  | 0.33875  | 0.00000  | -0.16857 | -0.31072 | -0.13551 |
| 204 | C9  | PZ  | 0.00000  | -0.03840 | 0.00000  | 0.00000  | 0.00000  |
| 205 | C9  | DXX | 0.00452  | 0.00000  | 0.00826  | -0.00103 | -0.00335 |
| 206 | C9  | DYY | -0.00827 | 0.00000  | -0.01684 | -0.01076 | -0.00509 |
| 207 | C9  | DZZ | 0.00036  | 0.00000  | 0.00607  | 0.00946  | 0.01096  |
| 208 | C9  | DXY | 0.01557  | 0.00000  | 0.00384  | -0.00547 | 0.00396  |
| 209 | C9  | DXZ | 0.00000  | 0.00978  | 0.00000  | 0.00000  | 0.00000  |
| 210 | C9  | DYZ | 0.00000  | -0.00135 | 0.00000  | 0.00000  | 0.00000  |
| 211 | H3  | S   | -0.05470 | 0.00000  | -0.05837 | -0.01757 | -0.01443 |
| 212 | H3  | S   | 0.26943  | 0.00000  | 0.49475  | 0.33937  | 0.12080  |
| 213 | H3  | PX  | 0.00488  | 0.00000  | -0.00053 | -0.00232 | 0.00082  |
| 214 | H3  | PY  | 0.00038  | 0.00000  | -0.00109 | -0.00185 | 0.00060  |
| 215 | H3  | PZ  | 0.00000  | -0.00128 | 0.00000  | 0.00000  | 0.00000  |
| 216 | H5  | S   | -0.00018 | -0.02425 | 0.02426  | 0.03103  | 0.03121  |
| 217 | H5  | S   | 0.42355  | -0.04936 | -0.00432 | 0.04669  | 0.15230  |



|     |    |    |          |          |          |          |          |
|-----|----|----|----------|----------|----------|----------|----------|
| 218 | H5 | PX | -0.00119 | -0.00174 | 0.00017  | -0.00175 | -0.00341 |
| 219 | H5 | PY | 0.00677  | -0.00140 | 0.00451  | 0.00206  | 0.00376  |
| 220 | H5 | PZ | 0.00032  | 0.00117  | 0.00030  | -0.00016 | -0.00210 |
| 221 | H7 | S  | -0.00018 | 0.02425  | 0.02426  | 0.03103  | 0.03121  |
| 222 | H7 | S  | 0.42355  | 0.04936  | -0.00432 | 0.04669  | 0.15230  |
| 223 | H7 | PX | -0.00119 | 0.00174  | 0.00017  | -0.00175 | -0.00341 |
| 224 | H7 | PY | 0.00677  | 0.00140  | 0.00451  | 0.00206  | 0.00376  |
| 225 | H7 | PZ | -0.00032 | 0.00117  | -0.00030 | 0.00016  | 0.00210  |

|              |          |          |          |          |          |
|--------------|----------|----------|----------|----------|----------|
| M0:          | 61       | 62       | 63       | 64       | 65       |
| Eigenvalues: | 0.47510  | 0.48296  | 0.52777  | 0.54410  | 0.58615  |
| (ev):        | 12.92810 | 13.14198 | 14.36134 | 14.80580 | 15.94991 |

|    |    |     |          |          |          |          |          |
|----|----|-----|----------|----------|----------|----------|----------|
|    |    |     | A        | A        | A        | A        | A        |
| 1  | H1 | S   | -0.01773 | 0.08117  | -0.00474 | 0.04481  | 0.03253  |
| 2  | H1 | S   | -0.07907 | -0.68322 | 0.24568  | -0.87928 | -0.16288 |
| 3  | H1 | PX  | 0.00150  | 0.00787  | 0.00168  | 0.00657  | 0.00202  |
| 4  | H1 | PY  | -0.00904 | 0.00954  | -0.00871 | 0.00529  | 0.00188  |
| 5  | H1 | PZ  | 0.00000  | 0.00000  | 0.00000  | 0.00000  | 0.00000  |
| 6  | C1 | S   | -0.05204 | -0.03251 | 0.01795  | 0.07163  | 0.01020  |
| 7  | C1 | S   | 0.10016  | 0.06327  | -0.02989 | -0.07724 | -0.10584 |
| 8  | C1 | PX  | -0.07915 | -0.01594 | 0.03310  | 0.11134  | 0.10067  |
| 9  | C1 | PY  | -0.07970 | 0.06482  | -0.07929 | 0.14171  | -0.12170 |
| 10 | C1 | PZ  | 0.00000  | 0.00000  | 0.00000  | 0.00000  | 0.00000  |
| 11 | C1 | S   | 0.22583  | 0.48532  | -0.09553 | -1.94114 | 0.58689  |
| 12 | C1 | PX  | 0.48549  | 0.42346  | 0.19227  | 1.38850  | 0.55527  |
| 13 | C1 | PY  | -1.79880 | 0.61493  | -1.10533 | 1.07466  | -1.36977 |
| 14 | C1 | PZ  | 0.00000  | 0.00000  | 0.00000  | 0.00000  | 0.00000  |
| 15 | C1 | DXX | 0.01855  | 0.02825  | 0.00166  | 0.00854  | -0.00577 |
| 16 | C1 | DYY | -0.02328 | -0.01246 | -0.00047 | 0.00096  | -0.01453 |
| 17 | C1 | DZZ | 0.00364  | -0.00204 | 0.00031  | -0.01194 | 0.00437  |
| 18 | C1 | DXY | -0.01003 | 0.03256  | -0.02318 | 0.01222  | 0.01576  |
| 19 | C1 | DXZ | 0.00000  | 0.00000  | 0.00000  | 0.00000  | 0.00000  |
| 20 | C1 | DYZ | 0.00000  | 0.00000  | 0.00000  | 0.00000  | 0.00000  |
| 21 | C2 | S   | -0.03934 | -0.00378 | 0.00249  | 0.05760  | -0.02396 |
| 22 | C2 | S   | 0.02976  | 0.03759  | -0.00712 | -0.06923 | 0.11587  |
| 23 | C2 | PX  | 0.06595  | 0.00599  | 0.06534  | -0.11388 | 0.13754  |
| 24 | C2 | PY  | -0.06045 | -0.03453 | -0.10230 | -0.15126 | -0.07928 |
| 25 | C2 | PZ  | 0.00000  | 0.00000  | 0.00000  | 0.00000  | 0.00000  |
| 26 | C2 | S   | 1.40739  | 0.09357  | -0.34674 | -2.02289 | -0.66521 |
| 27 | C2 | PX  | 0.56950  | -0.45794 | 0.72472  | -0.85806 | 0.41589  |
| 28 | C2 | PY  | -0.34751 | 0.62066  | -1.49704 | -1.62005 | -1.03943 |
| 29 | C2 | PZ  | 0.00000  | 0.00000  | 0.00000  | 0.00000  | 0.00000  |
| 30 | C2 | DXX | 0.01296  | 0.03857  | -0.02451 | 0.00299  | 0.00291  |
| 31 | C2 | DYY | -0.01229 | -0.01333 | 0.02460  | -0.00642 | 0.01105  |
| 32 | C2 | DZZ | 0.00210  | -0.00445 | -0.00088 | -0.00659 | 0.00232  |
| 33 | C2 | DXY | 0.02635  | 0.00236  | 0.00021  | 0.01397  | -0.00255 |
| 34 | C2 | DXZ | 0.00000  | 0.00000  | 0.00000  | 0.00000  | 0.00000  |
| 35 | C2 | DYZ | 0.00000  | 0.00000  | 0.00000  | 0.00000  | 0.00000  |
| 36 | C3 | S   | 0.09614  | 0.00694  | -0.04060 | -0.05095 | 0.00223  |
| 37 | C3 | S   | -0.11078 | 0.02914  | 0.06789  | 0.03005  | 0.11898  |
| 38 | C3 | PX  | -0.01848 | -0.00388 | 0.03603  | -0.00903 | -0.26456 |
| 39 | C3 | PY  | -0.13630 | -0.04907 | -0.17090 | 0.08226  | -0.03397 |
| 40 | C3 | PZ  | 0.00000  | 0.00000  | 0.00000  | 0.00000  | 0.00000  |

|    |    |     |          |          |          |          |          |
|----|----|-----|----------|----------|----------|----------|----------|
| 41 | C3 | S   | -2.02561 | -0.35604 | 0.48163  | 1.59967  | -0.96161 |
| 42 | C3 | PX  | -0.52808 | -0.32397 | 0.26707  | 0.09379  | -1.65224 |
| 43 | C3 | PY  | -0.94777 | 0.10141  | -1.37569 | 1.06263  | -0.79829 |
| 44 | C3 | PZ  | 0.00000  | 0.00000  | 0.00000  | 0.00000  | 0.00000  |
| 45 | C3 | DXX | 0.00649  | 0.00591  | 0.00326  | 0.02069  | 0.00917  |
| 46 | C3 | DYY | 0.00721  | 0.02196  | -0.00411 | -0.01899 | 0.02476  |
| 47 | C3 | DZZ | -0.01290 | -0.00845 | 0.00264  | 0.00443  | -0.00265 |
| 48 | C3 | DXY | 0.01516  | -0.02840 | 0.02581  | -0.01510 | 0.00023  |
| 49 | C3 | DXZ | 0.00000  | 0.00000  | 0.00000  | 0.00000  | 0.00000  |
| 50 | C3 | DYZ | 0.00000  | 0.00000  | 0.00000  | 0.00000  | 0.00000  |
| 51 | C4 | S   | 0.04553  | 0.05688  | -0.04880 | -0.00162 | -0.09495 |
| 52 | C4 | S   | -0.04705 | -0.05954 | 0.05256  | -0.00283 | -0.10834 |
| 53 | C4 | PX  | 0.09696  | -0.10546 | 0.05535  | 0.02322  | -0.03016 |
| 54 | C4 | PY  | -0.14437 | -0.06721 | -0.08143 | -0.09447 | 0.20541  |
| 55 | C4 | PZ  | 0.00000  | 0.00000  | 0.00000  | 0.00000  | 0.00000  |
| 56 | C4 | S   | -0.24763 | -0.96676 | 1.56054  | 0.80795  | 3.08555  |
| 57 | C4 | PX  | 1.37729  | -0.40272 | 0.16708  | -0.02434 | -0.01136 |
| 58 | C4 | PY  | -0.91973 | -1.10263 | -0.26926 | -1.45530 | 0.83883  |
| 59 | C4 | PZ  | 0.00000  | 0.00000  | 0.00000  | 0.00000  | 0.00000  |
| 60 | C4 | DXX | -0.02005 | 0.00059  | -0.01027 | 0.01216  | -0.03458 |
| 61 | C4 | DYY | 0.02712  | 0.01235  | 0.00698  | -0.00129 | -0.00986 |
| 62 | C4 | DZZ | -0.01104 | -0.01578 | 0.00626  | -0.01108 | 0.02124  |
| 63 | C4 | DXY | -0.02201 | -0.01073 | 0.01206  | 0.03468  | -0.00029 |
| 64 | C4 | DXZ | 0.00000  | 0.00000  | 0.00000  | 0.00000  | 0.00000  |
| 65 | C4 | DYZ | 0.00000  | 0.00000  | 0.00000  | 0.00000  | 0.00000  |
| 66 | C5 | S   | -0.01911 | 0.01967  | -0.01635 | -0.04706 | 0.02919  |
| 67 | C5 | S   | -0.01412 | 0.00173  | 0.04316  | 0.05981  | -0.11302 |
| 68 | C5 | PX  | -0.03766 | 0.01068  | -0.06133 | 0.04961  | -0.17684 |
| 69 | C5 | PY  | 0.02570  | 0.11736  | -0.12399 | -0.05096 | -0.04245 |
| 70 | C5 | PZ  | 0.00000  | 0.00000  | 0.00000  | 0.00000  | 0.00000  |
| 71 | C5 | S   | 0.89835  | -0.62503 | 0.89532  | 1.68451  | 0.31788  |
| 72 | C5 | PX  | 0.38251  | -0.17501 | -0.87524 | -0.75173 | -0.98379 |
| 73 | C5 | PY  | 1.02999  | 0.75608  | -0.82989 | -1.52085 | -0.78148 |
| 74 | C5 | PZ  | 0.00000  | 0.00000  | 0.00000  | 0.00000  | 0.00000  |
| 75 | C5 | DXX | -0.00080 | 0.00878  | 0.01060  | 0.02569  | -0.01536 |
| 76 | C5 | DYY | 0.01995  | 0.01108  | -0.00681 | -0.00993 | -0.00546 |
| 77 | C5 | DZZ | -0.00813 | -0.00533 | 0.00454  | 0.00163  | -0.00107 |
| 78 | C5 | DXY | -0.02686 | -0.01916 | -0.01165 | -0.02682 | -0.00404 |
| 79 | C5 | DXZ | 0.00000  | 0.00000  | 0.00000  | 0.00000  | 0.00000  |
| 80 | C5 | DYZ | 0.00000  | 0.00000  | 0.00000  | 0.00000  | 0.00000  |
| 81 | C6 | S   | 0.02002  | 0.02239  | 0.00467  | 0.02341  | 0.10547  |
| 82 | C6 | S   | 0.01502  | 0.04382  | 0.02275  | -0.02782 | 0.09962  |
| 83 | C6 | PX  | 0.25979  | -0.07575 | 0.07362  | -0.00992 | -0.01172 |
| 84 | C6 | PY  | -0.05808 | 0.08923  | -0.07377 | 0.04598  | 0.04203  |
| 85 | C6 | PZ  | 0.00000  | 0.00000  | 0.00000  | 0.00000  | 0.00000  |
| 86 | C6 | S   | -0.81762 | -1.23951 | -1.19529 | -0.65108 | -3.76111 |
| 87 | C6 | PX  | 0.63036  | -0.31984 | 0.65913  | -0.04450 | -0.35397 |
| 88 | C6 | PY  | -0.32187 | 1.78064  | -0.49941 | 0.91225  | 1.02233  |
| 89 | C6 | PZ  | 0.00000  | 0.00000  | 0.00000  | 0.00000  | 0.00000  |
| 90 | C6 | DXX | -0.00683 | -0.00154 | 0.02346  | 0.00612  | 0.04088  |
| 91 | C6 | DYY | 0.01192  | 0.01326  | -0.03976 | -0.00892 | 0.01920  |
| 92 | C6 | DZZ | -0.00054 | -0.01071 | 0.00126  | -0.00414 | -0.02311 |
| 93 | C6 | DXY | -0.02335 | 0.00082  | -0.01049 | 0.02067  | 0.00076  |
| 94 | C6 | DXZ | 0.00000  | 0.00000  | 0.00000  | 0.00000  | 0.00000  |

|     |    |     |          |          |          |          |          |
|-----|----|-----|----------|----------|----------|----------|----------|
| 95  | C6 | DYZ | 0.00000  | 0.00000  | 0.00000  | 0.00000  | 0.00000  |
| 96  | C7 | S   | -0.01125 | -0.02178 | 0.02257  | 0.03784  | -0.03270 |
| 97  | C7 | S   | 0.04720  | 0.09531  | -0.03054 | -0.08724 | 0.10138  |
| 98  | C7 | PX  | -0.01806 | -0.06477 | 0.02921  | 0.07127  | -0.05166 |
| 99  | C7 | PY  | -0.00005 | 0.12170  | -0.15330 | 0.08486  | 0.00081  |
| 100 | C7 | PZ  | 0.00000  | 0.00000  | 0.00000  | 0.00000  | 0.00000  |
| 101 | C7 | S   | -0.26216 | 0.45077  | -0.54215 | -0.60806 | 0.57534  |
| 102 | C7 | PX  | 0.83536  | -1.09257 | 0.03986  | 0.41070  | 0.17598  |
| 103 | C7 | PY  | 0.75655  | 0.39575  | -1.01105 | 0.20403  | 0.91674  |
| 104 | C7 | PZ  | 0.00000  | 0.00000  | 0.00000  | 0.00000  | 0.00000  |
| 105 | C7 | DXX | 0.01185  | 0.00980  | -0.00647 | -0.02618 | 0.04544  |
| 106 | C7 | DYY | -0.00423 | 0.01103  | 0.00940  | 0.01661  | -0.01266 |
| 107 | C7 | DZZ | -0.00197 | -0.00047 | -0.00363 | -0.00591 | -0.00580 |
| 108 | C7 | DXY | 0.00330  | 0.00132  | -0.03163 | 0.01658  | -0.00189 |
| 109 | C7 | DXZ | 0.00000  | 0.00000  | 0.00000  | 0.00000  | 0.00000  |
| 110 | C7 | DYZ | 0.00000  | 0.00000  | 0.00000  | 0.00000  | 0.00000  |
| 111 | O1 | S   | -0.01467 | -0.03332 | 0.00637  | -0.03129 | 0.04862  |
| 112 | O1 | S   | 0.04246  | 0.01967  | 0.03830  | 0.07527  | -0.03978 |
| 113 | O1 | PX  | -0.04343 | -0.02748 | -0.04231 | -0.10796 | 0.05831  |
| 114 | O1 | PY  | -0.18720 | -0.13956 | -0.01204 | -0.05225 | 0.17749  |
| 115 | O1 | PZ  | 0.00000  | 0.00000  | 0.00000  | 0.00000  | 0.00000  |
| 116 | O1 | S   | 0.18677  | 0.73843  | -0.33207 | 0.42023  | -1.02738 |
| 117 | O1 | PX  | -0.39897 | -0.08056 | -0.15564 | -0.31107 | 0.15489  |
| 118 | O1 | PY  | -0.57329 | -0.59439 | 0.00022  | -0.49095 | 0.79043  |
| 119 | O1 | PZ  | 0.00000  | 0.00000  | 0.00000  | 0.00000  | 0.00000  |
| 120 | O1 | DXX | -0.00265 | -0.01222 | -0.00441 | -0.03151 | 0.00161  |
| 121 | O1 | DYY | -0.00409 | -0.00424 | 0.01465  | 0.02509  | 0.01014  |
| 122 | O1 | DZZ | 0.00663  | -0.02027 | 0.02368  | 0.00830  | 0.03507  |
| 123 | O1 | DXY | 0.00061  | 0.00552  | -0.01023 | -0.02932 | 0.00352  |
| 124 | O1 | DXZ | 0.00000  | 0.00000  | 0.00000  | 0.00000  | 0.00000  |
| 125 | O1 | DYZ | 0.00000  | 0.00000  | 0.00000  | 0.00000  | 0.00000  |
| 126 | H4 | S   | 0.09377  | 0.04560  | 0.04104  | 0.06678  | 0.01637  |
| 127 | H4 | S   | -0.53728 | -0.49752 | -0.06686 | 0.10485  | -0.17318 |
| 128 | H4 | PX  | -0.00185 | -0.00518 | -0.00606 | -0.01290 | -0.00155 |
| 129 | H4 | PY  | 0.00988  | 0.00366  | 0.00120  | -0.00484 | 0.00031  |
| 130 | H4 | PZ  | 0.00000  | 0.00000  | 0.00000  | 0.00000  | 0.00000  |
| 131 | N1 | S   | -0.01475 | -0.10286 | -0.01821 | -0.02094 | -0.07347 |
| 132 | N1 | S   | 0.00189  | 0.07644  | -0.00343 | -0.02184 | 0.06399  |
| 133 | N1 | PX  | 0.00418  | -0.01055 | 0.12268  | 0.04550  | 0.00111  |
| 134 | N1 | PY  | -0.01105 | 0.04241  | -0.15597 | 0.02021  | 0.09403  |
| 135 | N1 | PZ  | 0.00000  | 0.00000  | 0.00000  | 0.00000  | 0.00000  |
| 136 | N1 | S   | 0.24538  | 2.95948  | 0.68862  | 0.95415  | 2.32000  |
| 137 | N1 | PX  | -0.08617 | 0.79739  | 0.35084  | 0.09185  | 0.37483  |
| 138 | N1 | PY  | -0.26076 | 0.91515  | 0.12906  | 0.26577  | 0.88851  |
| 139 | N1 | PZ  | 0.00000  | 0.00000  | 0.00000  | 0.00000  | 0.00000  |
| 140 | N1 | DXX | -0.01252 | -0.00417 | -0.00193 | 0.00617  | 0.02221  |
| 141 | N1 | DYY | -0.00919 | 0.00705  | 0.01144  | -0.00851 | 0.00382  |
| 142 | N1 | DZZ | -0.00746 | -0.04170 | -0.01442 | -0.01968 | -0.04726 |
| 143 | N1 | DXY | 0.02107  | 0.00383  | 0.00127  | -0.01608 | -0.00300 |
| 144 | N1 | DXZ | 0.00000  | 0.00000  | 0.00000  | 0.00000  | 0.00000  |
| 145 | N1 | DYZ | 0.00000  | 0.00000  | 0.00000  | 0.00000  | 0.00000  |
| 146 | H6 | S   | 0.06036  | 0.08245  | -0.05009 | 0.02392  | -0.03419 |
| 147 | H6 | S   | 0.04501  | -0.20473 | 0.28476  | -0.72222 | 0.18775  |
| 148 | H6 | PX  | -0.00109 | -0.01195 | 0.00665  | -0.00109 | 0.00096  |

|     |     |     |          |          |          |          |          |
|-----|-----|-----|----------|----------|----------|----------|----------|
| 149 | H6  | PY  | -0.01214 | 0.00675  | -0.00553 | -0.00438 | -0.00004 |
| 150 | H6  | PZ  | 0.00000  | 0.00000  | 0.00000  | 0.00000  | 0.00000  |
| 151 | C8  | S   | 0.04062  | -0.01025 | 0.01150  | -0.01740 | 0.03269  |
| 152 | C8  | S   | -0.07440 | 0.09966  | -0.01382 | 0.06253  | 0.14759  |
| 153 | C8  | PX  | 0.10261  | 0.09616  | 0.00415  | 0.02044  | -0.05769 |
| 154 | C8  | PY  | 0.04595  | -0.11718 | -0.23509 | 0.18176  | 0.05187  |
| 155 | C8  | PZ  | 0.00000  | 0.00000  | 0.00000  | 0.00000  | 0.00000  |
| 156 | C8  | S   | -0.64914 | 0.61965  | 1.33618  | -0.94051 | -0.97053 |
| 157 | C8  | PX  | 0.51967  | 1.16203  | 0.62629  | 0.34893  | 0.59215  |
| 158 | C8  | PY  | 1.17588  | -1.90945 | -2.55456 | 1.59541  | 0.38489  |
| 159 | C8  | PZ  | 0.00000  | 0.00000  | 0.00000  | 0.00000  | 0.00000  |
| 160 | C8  | DXX | -0.00230 | -0.00226 | 0.02834  | 0.00967  | 0.00479  |
| 161 | C8  | DYY | 0.01651  | 0.02475  | 0.01049  | -0.03782 | 0.05032  |
| 162 | C8  | DZZ | -0.00821 | -0.00618 | -0.01401 | 0.01060  | -0.00741 |
| 163 | C8  | DXY | 0.00268  | -0.00694 | -0.00906 | -0.00510 | -0.00108 |
| 164 | C8  | DXZ | 0.00000  | 0.00000  | 0.00000  | 0.00000  | 0.00000  |
| 165 | C8  | DYZ | 0.00000  | 0.00000  | 0.00000  | 0.00000  | 0.00000  |
| 166 | H8  | S   | -0.01358 | -0.00025 | -0.02129 | -0.06346 | 0.05972  |
| 167 | H8  | S   | -0.60637 | 0.76086  | -0.00929 | -0.12312 | -0.28567 |
| 168 | H8  | PX  | 0.00437  | -0.00308 | -0.00263 | -0.00330 | 0.00844  |
| 169 | H8  | PY  | 0.00316  | -0.00161 | -0.01983 | 0.00634  | -0.00122 |
| 170 | H8  | PZ  | 0.00000  | 0.00000  | 0.00000  | 0.00000  | 0.00000  |
| 171 | C10 | S   | -0.02620 | 0.03057  | 0.03852  | -0.02054 | -0.01809 |
| 172 | C10 | S   | 0.01744  | 0.08944  | 0.05217  | -0.08434 | 0.12118  |
| 173 | C10 | PX  | -0.01972 | -0.04576 | -0.05031 | -0.04050 | -0.00908 |
| 174 | C10 | PY  | 0.05236  | 0.07755  | -0.00535 | -0.10739 | 0.14191  |
| 175 | C10 | PZ  | 0.00000  | 0.00000  | 0.00000  | 0.00000  | 0.00000  |
| 176 | C10 | S   | 0.97343  | -2.03963 | -2.37983 | 1.53269  | 0.21178  |
| 177 | C10 | PX  | -0.68963 | -0.06424 | 0.43201  | -0.63449 | -0.39663 |
| 178 | C10 | PY  | 0.85568  | -1.46746 | -2.13990 | 1.22162  | 0.59968  |
| 179 | C10 | PZ  | 0.00000  | 0.00000  | 0.00000  | 0.00000  | 0.00000  |
| 180 | C10 | DXX | 0.00850  | -0.01320 | -0.02036 | -0.00076 | 0.02065  |
| 181 | C10 | DYY | -0.00542 | 0.01529  | 0.00874  | 0.00988  | -0.00186 |
| 182 | C10 | DZZ | -0.00343 | 0.00837  | 0.00586  | -0.01084 | 0.00182  |
| 183 | C10 | DXY | 0.00687  | 0.01541  | 0.01151  | 0.02494  | 0.00813  |
| 184 | C10 | DXZ | 0.00000  | 0.00000  | 0.00000  | 0.00000  | 0.00000  |
| 185 | C10 | DYZ | 0.00000  | 0.00000  | 0.00000  | 0.00000  | 0.00000  |
| 186 | H16 | S   | 0.03144  | -0.08488 | -0.12873 | -0.01860 | 0.04020  |
| 187 | H16 | S   | 0.53310  | 0.18387  | -0.32839 | 0.44565  | 0.39406  |
| 188 | H16 | PX  | -0.00147 | -0.00235 | -0.00207 | -0.00051 | 0.00330  |
| 189 | H16 | PY  | 0.00446  | 0.00299  | 0.00065  | 0.00958  | 0.00705  |
| 190 | H16 | PZ  | 0.00000  | 0.00000  | 0.00000  | 0.00000  | 0.00000  |
| 191 | H18 | S   | 0.01991  | 0.01856  | -0.01808 | 0.11727  | 0.05559  |
| 192 | H18 | S   | -0.13416 | -0.26931 | -0.42409 | -0.14583 | 0.18722  |
| 193 | H18 | PX  | -0.00425 | 0.00396  | 0.00718  | 0.00109  | -0.00356 |
| 194 | H18 | PY  | 0.00150  | -0.01252 | -0.00840 | -0.00553 | -0.00586 |
| 195 | H18 | PZ  | 0.00000  | 0.00000  | 0.00000  | 0.00000  | 0.00000  |
| 196 | C9  | S   | -0.00668 | -0.00359 | -0.00696 | 0.00029  | 0.00156  |
| 197 | C9  | S   | 0.03558  | 0.00617  | -0.01155 | -0.10849 | -0.01571 |
| 198 | C9  | PX  | -0.01194 | -0.06174 | 0.07507  | 0.10599  | 0.09745  |
| 199 | C9  | PY  | -0.12711 | -0.00245 | -0.04630 | 0.08182  | -0.04781 |
| 200 | C9  | PZ  | 0.00000  | 0.00000  | 0.00000  | 0.00000  | 0.00000  |
| 201 | C9  | S   | 0.09365  | 0.01643  | 0.17949  | 0.43624  | -0.13494 |
| 202 | C9  | PX  | -0.67083 | -0.33838 | -0.26582 | -0.55480 | 0.30369  |

|     |    |     |          |          |          |          |          |
|-----|----|-----|----------|----------|----------|----------|----------|
| 203 | C9 | PY  | -0.12770 | -0.04943 | -0.16055 | -0.12606 | -0.02117 |
| 204 | C9 | PZ  | 0.00000  | 0.00000  | 0.00000  | 0.00000  | 0.00000  |
| 205 | C9 | DXX | 0.00239  | -0.00590 | 0.00514  | -0.00255 | 0.01364  |
| 206 | C9 | DYY | -0.00294 | 0.00018  | -0.01107 | 0.00291  | -0.02674 |
| 207 | C9 | DZZ | 0.02363  | 0.00705  | 0.00870  | -0.00051 | -0.00168 |
| 208 | C9 | DXY | 0.00886  | 0.00231  | 0.00023  | 0.00065  | 0.00373  |
| 209 | C9 | DXZ | 0.00000  | 0.00000  | 0.00000  | 0.00000  | 0.00000  |
| 210 | C9 | DYZ | 0.00000  | 0.00000  | 0.00000  | 0.00000  | 0.00000  |
| 211 | H3 | S   | -0.02758 | 0.01061  | -0.02617 | 0.02779  | -0.08731 |
| 212 | H3 | S   | 0.13379  | -0.02145 | 0.12081  | -0.14805 | 0.19663  |
| 213 | H3 | PX  | 0.00096  | 0.00193  | -0.00071 | 0.00486  | -0.00263 |
| 214 | H3 | PY  | 0.00539  | 0.00021  | 0.00073  | 0.00278  | -0.00388 |
| 215 | H3 | PZ  | 0.00000  | 0.00000  | 0.00000  | 0.00000  | 0.00000  |
| 216 | H5 | S   | 0.06696  | 0.01545  | 0.04034  | 0.03421  | 0.00744  |
| 217 | H5 | S   | 0.20436  | 0.20742  | -0.03824 | 0.09237  | -0.15246 |
| 218 | H5 | PX  | -0.00484 | -0.00305 | 0.00003  | -0.00025 | 0.00175  |
| 219 | H5 | PY  | 0.00481  | 0.00251  | 0.00344  | 0.00142  | 0.00596  |
| 220 | H5 | PZ  | -0.00295 | -0.00352 | 0.00100  | -0.00204 | 0.00450  |
| 221 | H7 | S   | 0.06696  | 0.01545  | 0.04034  | 0.03421  | 0.00744  |
| 222 | H7 | S   | 0.20436  | 0.20742  | -0.03824 | 0.09237  | -0.15246 |
| 223 | H7 | PX  | -0.00484 | -0.00305 | 0.00003  | -0.00025 | 0.00175  |
| 224 | H7 | PY  | 0.00481  | 0.00251  | 0.00344  | 0.00142  | 0.00596  |
| 225 | H7 | PZ  | 0.00295  | 0.00352  | -0.00100 | 0.00204  | -0.00450 |

|              |          |          |          |          |          |
|--------------|----------|----------|----------|----------|----------|
| M0:          | 66       | 67       | 68       | 69       | 70       |
| Eigenvalues: | 0.62933  | 0.66412  | 0.69372  | 0.70634  | 0.72492  |
| (ev):        | 17.12506 | 18.07154 | 18.87710 | 19.22061 | 19.72606 |

|    |    |     |          |          |          |          |          |
|----|----|-----|----------|----------|----------|----------|----------|
|    |    | A   | A        | A        | A        | A        |          |
| 1  | H1 | S   | -0.02214 | -0.07197 | 0.03058  | 0.02816  | 0.00000  |
| 2  | H1 | S   | 0.05250  | -0.00408 | 0.23581  | -0.00180 | 0.00000  |
| 3  | H1 | PX  | -0.00445 | -0.00779 | -0.00221 | -0.01168 | 0.00000  |
| 4  | H1 | PY  | -0.00326 | 0.01164  | -0.00888 | -0.00437 | 0.00000  |
| 5  | H1 | PZ  | 0.00000  | 0.00000  | 0.00000  | 0.00000  | -0.00499 |
| 6  | C1 | S   | 0.03655  | -0.03055 | 0.00658  | -0.02875 | 0.00000  |
| 7  | C1 | S   | -0.08000 | -0.10018 | -0.15554 | -0.35936 | 0.00000  |
| 8  | C1 | PX  | 0.09606  | 0.03557  | 0.17119  | 0.09098  | 0.00000  |
| 9  | C1 | PY  | -0.04194 | -0.24639 | -0.19094 | 0.14172  | 0.00000  |
| 10 | C1 | PZ  | 0.00000  | 0.00000  | 0.00000  | 0.00000  | -0.39285 |
| 11 | C1 | S   | -1.57939 | 0.97626  | 0.16734  | 0.99055  | 0.00000  |
| 12 | C1 | PX  | 0.79963  | -0.82898 | -0.83062 | -0.13301 | 0.00000  |
| 13 | C1 | PY  | -1.52800 | 1.48799  | 0.87577  | -1.11391 | 0.00000  |
| 14 | C1 | PZ  | 0.00000  | 0.00000  | 0.00000  | 0.00000  | 0.22592  |
| 15 | C1 | DXX | -0.01367 | -0.02354 | 0.00257  | -0.02060 | 0.00000  |
| 16 | C1 | DYY | 0.00703  | -0.01193 | -0.02371 | -0.08736 | 0.00000  |
| 17 | C1 | DZZ | -0.00730 | 0.00724  | -0.00246 | 0.01033  | 0.00000  |
| 18 | C1 | DXY | -0.00222 | 0.00382  | -0.01766 | 0.01736  | 0.00000  |
| 19 | C1 | DXZ | 0.00000  | 0.00000  | 0.00000  | 0.00000  | 0.02037  |
| 20 | C1 | DYZ | 0.00000  | 0.00000  | 0.00000  | 0.00000  | -0.00087 |
| 21 | C2 | S   | 0.05155  | 0.00570  | -0.04356 | 0.00031  | 0.00000  |
| 22 | C2 | S   | -0.05986 | -0.13560 | -0.07273 | -0.39537 | 0.00000  |
| 23 | C2 | PX  | -0.09690 | -0.00643 | 0.02584  | -0.22485 | 0.00000  |
| 24 | C2 | PY  | -0.06147 | -0.23413 | -0.09724 | 0.06433  | 0.00000  |
| 25 | C2 | PZ  | 0.00000  | 0.00000  | 0.00000  | 0.00000  | -0.27615 |

|    |    |     |          |          |          |          |          |
|----|----|-----|----------|----------|----------|----------|----------|
| 26 | C2 | S   | -1.09914 | -0.77693 | 0.78526  | 0.68042  | 0.00000  |
| 27 | C2 | PX  | -1.42402 | 0.35524  | 0.44102  | 0.33207  | 0.00000  |
| 28 | C2 | PY  | 0.49070  | -1.24798 | -1.11538 | 0.94469  | 0.00000  |
| 29 | C2 | PZ  | 0.00000  | 0.00000  | 0.00000  | 0.00000  | 0.22033  |
| 30 | C2 | DXX | 0.03067  | -0.02730 | 0.03461  | -0.05723 | 0.00000  |
| 31 | C2 | DYY | -0.00775 | -0.03370 | -0.06489 | -0.02206 | 0.00000  |
| 32 | C2 | DZZ | -0.01130 | 0.01242  | 0.00784  | -0.00320 | 0.00000  |
| 33 | C2 | DXY | 0.02065  | 0.00031  | 0.01001  | -0.00264 | 0.00000  |
| 34 | C2 | DXZ | 0.00000  | 0.00000  | 0.00000  | 0.00000  | -0.01075 |
| 35 | C2 | DYZ | 0.00000  | 0.00000  | 0.00000  | 0.00000  | -0.01175 |
| 36 | C3 | S   | 0.02226  | 0.06136  | 0.03554  | -0.01333 | 0.00000  |
| 37 | C3 | S   | -0.00940 | -0.08697 | -0.11687 | -0.39652 | 0.00000  |
| 38 | C3 | PX  | -0.02852 | 0.13058  | 0.29684  | -0.04529 | 0.00000  |
| 39 | C3 | PY  | 0.06318  | 0.07251  | -0.05399 | -0.18580 | 0.00000  |
| 40 | C3 | PZ  | 0.00000  | 0.00000  | 0.00000  | 0.00000  | -0.22618 |
| 41 | C3 | S   | -1.97308 | -1.76512 | -0.04394 | 0.34096  | 0.00000  |
| 42 | C3 | PX  | -0.21480 | 0.09130  | 2.22315  | -1.34958 | 0.00000  |
| 43 | C3 | PY  | 0.26489  | 1.89734  | 0.14592  | -0.48129 | 0.00000  |
| 44 | C3 | PZ  | 0.00000  | 0.00000  | 0.00000  | 0.00000  | 0.11839  |
| 45 | C3 | DXX | -0.02034 | -0.02330 | 0.00175  | -0.04372 | 0.00000  |
| 46 | C3 | DYY | -0.01716 | 0.02846  | 0.01091  | -0.07882 | 0.00000  |
| 47 | C3 | DZZ | 0.00792  | -0.01495 | -0.01773 | 0.00983  | 0.00000  |
| 48 | C3 | DXY | 0.00339  | 0.02002  | -0.01651 | -0.05335 | 0.00000  |
| 49 | C3 | DXZ | 0.00000  | 0.00000  | 0.00000  | 0.00000  | -0.00616 |
| 50 | C3 | DYZ | 0.00000  | 0.00000  | 0.00000  | 0.00000  | 0.00257  |
| 51 | C4 | S   | 0.01064  | 0.01230  | -0.04342 | 0.01066  | 0.00000  |
| 52 | C4 | S   | -0.13799 | -0.26770 | -0.13339 | -0.57257 | 0.00000  |
| 53 | C4 | PX  | 0.25538  | -0.13119 | -0.02023 | 0.04503  | 0.00000  |
| 54 | C4 | PY  | 0.00477  | 0.06809  | 0.06079  | 0.00210  | 0.00000  |
| 55 | C4 | PZ  | 0.00000  | 0.00000  | 0.00000  | 0.00000  | -0.41199 |
| 56 | C4 | S   | 0.52568  | -0.03650 | 0.47506  | 0.62108  | 0.00000  |
| 57 | C4 | PX  | 2.41324  | -1.52799 | -1.07419 | 0.62250  | 0.00000  |
| 58 | C4 | PY  | -0.15601 | 1.15105  | -0.06069 | 0.88991  | 0.00000  |
| 59 | C4 | PZ  | 0.00000  | 0.00000  | 0.00000  | 0.00000  | 0.43417  |
| 60 | C4 | DXX | -0.00784 | -0.03772 | -0.05903 | -0.10070 | 0.00000  |
| 61 | C4 | DYY | -0.00096 | 0.00369  | -0.01822 | 0.01006  | 0.00000  |
| 62 | C4 | DZZ | -0.00708 | 0.00115  | 0.02011  | -0.00551 | 0.00000  |
| 63 | C4 | DXY | 0.03845  | 0.03989  | 0.02946  | -0.00950 | 0.00000  |
| 64 | C4 | DXZ | 0.00000  | 0.00000  | 0.00000  | 0.00000  | -0.00242 |
| 65 | C4 | DYZ | 0.00000  | 0.00000  | 0.00000  | 0.00000  | 0.00718  |
| 66 | C5 | S   | -0.05598 | -0.02694 | 0.03542  | -0.01582 | 0.00000  |
| 67 | C5 | S   | -0.00002 | -0.11995 | -0.26084 | -0.35636 | 0.00000  |
| 68 | C5 | PX  | 0.13229  | 0.00892  | -0.12102 | -0.17820 | 0.00000  |
| 69 | C5 | PY  | 0.05106  | 0.06618  | 0.18002  | 0.00906  | 0.00000  |
| 70 | C5 | PZ  | 0.00000  | 0.00000  | 0.00000  | 0.00000  | -0.30558 |
| 71 | C5 | S   | 1.81306  | 0.70773  | -0.01676 | 0.09647  | 0.00000  |
| 72 | C5 | PX  | 1.40973  | -0.95829 | -1.02646 | 0.79472  | 0.00000  |
| 73 | C5 | PY  | 0.21460  | -1.88406 | -0.58568 | 0.47903  | 0.00000  |
| 74 | C5 | PZ  | 0.00000  | 0.00000  | 0.00000  | 0.00000  | 0.14726  |
| 75 | C5 | DXX | -0.00087 | -0.01195 | -0.01327 | -0.05744 | 0.00000  |
| 76 | C5 | DYY | -0.01680 | -0.04494 | -0.00834 | -0.06544 | 0.00000  |
| 77 | C5 | DZZ | 0.01168  | 0.01265  | -0.01610 | 0.01240  | 0.00000  |
| 78 | C5 | DXY | -0.03489 | -0.01494 | -0.04329 | -0.00335 | 0.00000  |
| 79 | C5 | DXZ | 0.00000  | 0.00000  | 0.00000  | 0.00000  | -0.00456 |

|     |    |     |          |          |          |          |          |
|-----|----|-----|----------|----------|----------|----------|----------|
| 80  | C5 | DYZ | 0.00000  | 0.00000  | 0.00000  | 0.00000  | 0.01064  |
| 81  | C6 | S   | -0.03653 | -0.03283 | 0.01811  | -0.00832 | 0.00000  |
| 82  | C6 | S   | 0.10496  | -0.08631 | -0.16880 | -0.38049 | 0.00000  |
| 83  | C6 | PX  | -0.13689 | 0.12932  | 0.23478  | -0.16669 | 0.00000  |
| 84  | C6 | PY  | -0.07563 | -0.11427 | 0.05924  | -0.08941 | 0.00000  |
| 85  | C6 | PZ  | 0.00000  | 0.00000  | 0.00000  | 0.00000  | -0.29158 |
| 86  | C6 | S   | 0.92531  | 1.54867  | -0.28528 | 0.50854  | 0.00000  |
| 87  | C6 | PX  | -0.38031 | 1.08897  | 2.47459  | -1.23598 | 0.00000  |
| 88  | C6 | PY  | 1.50929  | -1.45598 | 1.01888  | -1.08391 | 0.00000  |
| 89  | C6 | PZ  | 0.00000  | 0.00000  | 0.00000  | 0.00000  | 0.19210  |
| 90  | C6 | DXX | 0.00660  | -0.02098 | -0.05345 | -0.07946 | 0.00000  |
| 91  | C6 | DYY | 0.00880  | 0.00861  | 0.03081  | -0.03861 | 0.00000  |
| 92  | C6 | DZZ | 0.00285  | 0.00973  | -0.01247 | 0.00887  | 0.00000  |
| 93  | C6 | DXY | 0.01770  | -0.04577 | -0.01593 | 0.03688  | 0.00000  |
| 94  | C6 | DXZ | 0.00000  | 0.00000  | 0.00000  | 0.00000  | 0.00318  |
| 95  | C6 | DYZ | 0.00000  | 0.00000  | 0.00000  | 0.00000  | 0.00259  |
| 96  | C7 | S   | -0.08098 | -0.02843 | 0.01688  | -0.00638 | 0.00000  |
| 97  | C7 | S   | 0.03392  | 0.18669  | -0.07987 | -0.18399 | 0.00000  |
| 98  | C7 | PX  | -0.17825 | -0.04943 | 0.06137  | -0.03114 | 0.00000  |
| 99  | C7 | PY  | -0.28287 | -0.01273 | 0.22012  | 0.12138  | 0.00000  |
| 100 | C7 | PZ  | 0.00000  | 0.00000  | 0.00000  | 0.00000  | -0.17807 |
| 101 | C7 | S   | 2.42396  | 1.07181  | -0.15627 | 0.19260  | 0.00000  |
| 102 | C7 | PX  | -1.65369 | -1.17378 | 0.00619  | 0.39456  | 0.00000  |
| 103 | C7 | PY  | -0.18954 | 1.16211  | -2.02885 | 0.53314  | 0.00000  |
| 104 | C7 | PZ  | 0.00000  | 0.00000  | 0.00000  | 0.00000  | 0.14268  |
| 105 | C7 | DXX | -0.00594 | 0.03333  | -0.00720 | -0.06447 | 0.00000  |
| 106 | C7 | DYY | 0.00557  | 0.01380  | -0.01127 | -0.00654 | 0.00000  |
| 107 | C7 | DZZ | 0.01011  | 0.00703  | -0.00043 | 0.01090  | 0.00000  |
| 108 | C7 | DXY | -0.00809 | 0.00469  | 0.00240  | -0.01603 | 0.00000  |
| 109 | C7 | DXZ | 0.00000  | 0.00000  | 0.00000  | 0.00000  | 0.01387  |
| 110 | C7 | DYZ | 0.00000  | 0.00000  | 0.00000  | 0.00000  | -0.00847 |
| 111 | O1 | S   | 0.00035  | 0.00743  | 0.00282  | 0.01571  | 0.00000  |
| 112 | O1 | S   | 0.05550  | 0.09873  | 0.01678  | 0.01763  | 0.00000  |
| 113 | O1 | PX  | 0.01815  | -0.03638 | -0.02659 | 0.09615  | 0.00000  |
| 114 | O1 | PY  | 0.01303  | 0.01645  | 0.04922  | -0.07680 | 0.00000  |
| 115 | O1 | PZ  | 0.00000  | 0.00000  | 0.00000  | 0.00000  | -0.13988 |
| 116 | O1 | S   | -0.36978 | -0.67935 | -0.12198 | -0.64793 | 0.00000  |
| 117 | O1 | PX  | -0.36442 | 0.17322  | 0.09971  | 0.04986  | 0.00000  |
| 118 | O1 | PY  | 0.01300  | 0.35598  | 0.10212  | 0.31482  | 0.00000  |
| 119 | O1 | PZ  | 0.00000  | 0.00000  | 0.00000  | 0.00000  | -0.19079 |
| 120 | O1 | DXX | -0.02116 | 0.01907  | -0.01436 | 0.02425  | 0.00000  |
| 121 | O1 | DYY | 0.00209  | 0.01886  | 0.02380  | -0.05204 | 0.00000  |
| 122 | O1 | DZZ | 0.03612  | 0.05265  | 0.01877  | 0.04502  | 0.00000  |
| 123 | O1 | DXY | -0.04706 | -0.02459 | -0.01460 | -0.01036 | 0.00000  |
| 124 | O1 | DXZ | 0.00000  | 0.00000  | 0.00000  | 0.00000  | -0.00899 |
| 125 | O1 | DYZ | 0.00000  | 0.00000  | 0.00000  | 0.00000  | 0.02841  |
| 126 | H4 | S   | 0.02488  | -0.01376 | 0.15678  | -0.08690 | 0.00000  |
| 127 | H4 | S   | 0.13576  | 0.20434  | -0.39925 | 0.01694  | 0.00000  |
| 128 | H4 | PX  | -0.00151 | 0.00100  | -0.00317 | 0.01977  | 0.00000  |
| 129 | H4 | PY  | -0.00169 | -0.01227 | 0.00336  | -0.00776 | 0.00000  |
| 130 | H4 | PZ  | 0.00000  | 0.00000  | 0.00000  | 0.00000  | -0.00546 |
| 131 | N1 | S   | 0.00037  | -0.00751 | 0.01717  | 0.00856  | 0.00000  |
| 132 | N1 | S   | -0.01053 | 0.02781  | -0.01378 | 0.03161  | 0.00000  |
| 133 | N1 | PX  | -0.07537 | 0.15298  | -0.16694 | 0.11491  | 0.00000  |

|     |     |     |          |          |          |          |          |
|-----|-----|-----|----------|----------|----------|----------|----------|
| 134 | N1  | PY  | 0.07414  | -0.13387 | 0.22944  | -0.06660 | 0.00000  |
| 135 | N1  | PZ  | 0.00000  | 0.00000  | 0.00000  | 0.00000  | -0.03543 |
| 136 | N1  | S   | 0.65280  | -0.39675 | -0.67569 | -0.53338 | 0.00000  |
| 137 | N1  | PX  | 0.22740  | 0.41545  | -1.46898 | 0.48381  | 0.00000  |
| 138 | N1  | PY  | 0.41532  | -1.13591 | 1.23094  | -0.69583 | 0.00000  |
| 139 | N1  | PZ  | 0.00000  | 0.00000  | 0.00000  | 0.00000  | 0.00351  |
| 140 | N1  | DXX | -0.01076 | -0.01901 | -0.02025 | 0.01571  | 0.00000  |
| 141 | N1  | DYY | 0.04433  | -0.01309 | -0.01710 | -0.00450 | 0.00000  |
| 142 | N1  | DZZ | -0.01398 | 0.01130  | 0.02366  | 0.03036  | 0.00000  |
| 143 | N1  | DXY | -0.01530 | 0.03447  | 0.03130  | -0.02522 | 0.00000  |
| 144 | N1  | DXZ | 0.00000  | 0.00000  | 0.00000  | 0.00000  | -0.00634 |
| 145 | N1  | DYZ | 0.00000  | 0.00000  | 0.00000  | 0.00000  | -0.02011 |
| 146 | H6  | S   | 0.15257  | -0.03793 | 0.08113  | -0.04443 | 0.00000  |
| 147 | H6  | S   | -0.60046 | 0.02456  | -0.23432 | 0.20497  | 0.00000  |
| 148 | H6  | PX  | -0.01503 | 0.00972  | -0.00346 | 0.01852  | 0.00000  |
| 149 | H6  | PY  | 0.00050  | 0.00359  | 0.00859  | 0.00093  | 0.00000  |
| 150 | H6  | PZ  | 0.00000  | 0.00000  | 0.00000  | 0.00000  | -0.00289 |
| 151 | C8  | S   | 0.04083  | 0.05874  | -0.04585 | 0.00097  | 0.00000  |
| 152 | C8  | S   | 0.00181  | 0.00842  | -0.21833 | -0.10959 | 0.00000  |
| 153 | C8  | PX  | -0.16341 | 0.31643  | -0.11036 | -0.05228 | 0.00000  |
| 154 | C8  | PY  | -0.11161 | -0.09029 | 0.00942  | -0.03201 | 0.00000  |
| 155 | C8  | PZ  | 0.00000  | 0.00000  | 0.00000  | 0.00000  | -0.10566 |
| 156 | C8  | S   | -1.10207 | -0.69664 | 1.26873  | 0.17717  | 0.00000  |
| 157 | C8  | PX  | -0.98769 | 1.12815  | -2.50200 | 1.01674  | 0.00000  |
| 158 | C8  | PY  | -1.50762 | -0.48600 | -0.26252 | -0.14141 | 0.00000  |
| 159 | C8  | PZ  | 0.00000  | 0.00000  | 0.00000  | 0.00000  | 0.03593  |
| 160 | C8  | DXX | -0.00384 | 0.01772  | -0.05363 | 0.00350  | 0.00000  |
| 161 | C8  | DYY | 0.01558  | 0.04752  | -0.02548 | -0.04971 | 0.00000  |
| 162 | C8  | DZZ | -0.01133 | -0.02715 | 0.02500  | 0.00347  | 0.00000  |
| 163 | C8  | DXY | 0.05242  | -0.01123 | -0.03516 | -0.00576 | 0.00000  |
| 164 | C8  | DXZ | 0.00000  | 0.00000  | 0.00000  | 0.00000  | -0.00635 |
| 165 | C8  | DYZ | 0.00000  | 0.00000  | 0.00000  | 0.00000  | 0.00346  |
| 166 | H8  | S   | -0.07205 | 0.06647  | 0.03516  | -0.15878 | 0.00000  |
| 167 | H8  | S   | 0.69414  | 0.60993  | -0.08608 | -0.14436 | 0.00000  |
| 168 | H8  | PX  | -0.00559 | 0.00214  | 0.00129  | -0.00885 | 0.00000  |
| 169 | H8  | PY  | -0.00811 | 0.01047  | -0.00283 | -0.00413 | 0.00000  |
| 170 | H8  | PZ  | 0.00000  | 0.00000  | 0.00000  | 0.00000  | -0.00181 |
| 171 | C10 | S   | -0.00273 | -0.00509 | 0.00237  | 0.00374  | 0.00000  |
| 172 | C10 | S   | 0.04547  | 0.17485  | -0.17768 | -0.07142 | 0.00000  |
| 173 | C10 | PX  | 0.10144  | 0.04493  | -0.09694 | -0.05289 | 0.00000  |
| 174 | C10 | PY  | 0.03960  | 0.18831  | -0.07058 | -0.10797 | 0.00000  |
| 175 | C10 | PZ  | 0.00000  | 0.00000  | 0.00000  | 0.00000  | -0.11684 |
| 176 | C10 | S   | -0.65557 | -0.53620 | 0.14951  | -0.17203 | 0.00000  |
| 177 | C10 | PX  | 0.68870  | -0.59696 | 1.17864  | -0.14487 | 0.00000  |
| 178 | C10 | PY  | -0.17063 | -0.53273 | -0.13276 | -0.11814 | 0.00000  |
| 179 | C10 | PZ  | 0.00000  | 0.00000  | 0.00000  | 0.00000  | 0.11198  |
| 180 | C10 | DXX | 0.02773  | 0.01325  | -0.04470 | -0.01408 | 0.00000  |
| 181 | C10 | DYY | -0.02183 | 0.01269  | -0.02594 | 0.00920  | 0.00000  |
| 182 | C10 | DZZ | -0.00170 | 0.00363  | 0.01386  | -0.00427 | 0.00000  |
| 183 | C10 | DXY | -0.05939 | 0.01035  | -0.01548 | 0.02653  | 0.00000  |
| 184 | C10 | DXZ | 0.00000  | 0.00000  | 0.00000  | 0.00000  | 0.00302  |
| 185 | C10 | DYZ | 0.00000  | 0.00000  | 0.00000  | 0.00000  | -0.00918 |
| 186 | H16 | S   | 0.15829  | 0.01980  | -0.08961 | -0.10939 | 0.00000  |
| 187 | H16 | S   | -0.59553 | 0.38825  | -0.67956 | 0.11663  | 0.00000  |



|     |     |     |          |          |          |          |          |
|-----|-----|-----|----------|----------|----------|----------|----------|
| 188 | H16 | PX  | 0.00278  | -0.00496 | 0.00202  | -0.00126 | 0.00000  |
| 189 | H16 | PY  | -0.01224 | -0.00336 | -0.00985 | 0.01239  | 0.00000  |
| 190 | H16 | PZ  | 0.00000  | 0.00000  | 0.00000  | 0.00000  | -0.00109 |
| 191 | H18 | S   | -0.15292 | -0.03680 | -0.09506 | 0.10254  | 0.00000  |
| 192 | H18 | S   | 0.53293  | -0.39746 | 0.38803  | -0.21731 | 0.00000  |
| 193 | H18 | PX  | -0.00288 | -0.01181 | 0.01311  | 0.00578  | 0.00000  |
| 194 | H18 | PY  | 0.01580  | -0.00276 | 0.01319  | -0.00409 | 0.00000  |
| 195 | H18 | PZ  | 0.00000  | 0.00000  | 0.00000  | 0.00000  | -0.00191 |
| 196 | C9  | S   | 0.01261  | 0.00283  | -0.00050 | 0.00303  | 0.00000  |
| 197 | C9  | S   | -0.13042 | -0.08604 | -0.04005 | 0.01314  | 0.00000  |
| 198 | C9  | PX  | 0.25695  | 0.05664  | 0.06748  | 0.09728  | 0.00000  |
| 199 | C9  | PY  | 0.04496  | 0.21855  | 0.09266  | -0.08915 | 0.00000  |
| 200 | C9  | PZ  | 0.00000  | 0.00000  | 0.00000  | 0.00000  | -0.38886 |
| 201 | C9  | S   | 0.32476  | 0.14383  | 0.07442  | -0.10641 | 0.00000  |
| 202 | C9  | PX  | -0.44834 | 0.18276  | 0.00504  | -0.01005 | 0.00000  |
| 203 | C9  | PY  | 0.08864  | -0.28389 | -0.20948 | 0.28886  | 0.00000  |
| 204 | C9  | PZ  | 0.00000  | 0.00000  | 0.00000  | 0.00000  | 1.03858  |
| 205 | C9  | DXX | 0.00789  | -0.01342 | 0.00167  | -0.00501 | 0.00000  |
| 206 | C9  | DYY | 0.00117  | 0.03289  | 0.00637  | 0.00875  | 0.00000  |
| 207 | C9  | DZZ | -0.00274 | -0.03287 | -0.01374 | 0.00322  | 0.00000  |
| 208 | C9  | DXY | 0.02187  | -0.00638 | -0.00907 | 0.03039  | 0.00000  |
| 209 | C9  | DXZ | 0.00000  | 0.00000  | 0.00000  | 0.00000  | -0.03675 |
| 210 | C9  | DYZ | 0.00000  | 0.00000  | 0.00000  | 0.00000  | 0.03229  |
| 211 | H3  | S   | -0.01668 | 0.14942  | 0.05198  | -0.04958 | 0.00000  |
| 212 | H3  | S   | -0.18083 | -0.07693 | 0.04829  | -0.11050 | 0.00000  |
| 213 | H3  | PX  | 0.00844  | 0.00414  | -0.00012 | 0.00635  | 0.00000  |
| 214 | H3  | PY  | 0.00756  | -0.00473 | -0.00342 | 0.00914  | 0.00000  |
| 215 | H3  | PZ  | 0.00000  | 0.00000  | 0.00000  | 0.00000  | 0.01690  |
| 216 | H5  | S   | 0.04061  | -0.07852 | -0.01623 | -0.00513 | 0.26634  |
| 217 | H5  | S   | 0.01372  | -0.11491 | -0.06462 | 0.03506  | 0.28097  |
| 218 | H5  | PX  | -0.00073 | 0.00428  | 0.00346  | -0.00686 | -0.00126 |
| 219 | H5  | PY  | 0.00601  | -0.01022 | -0.00381 | 0.00692  | 0.00358  |
| 220 | H5  | PZ  | 0.00290  | 0.00534  | 0.00467  | 0.00492  | 0.01944  |
| 221 | H7  | S   | 0.04061  | -0.07852 | -0.01623 | -0.00513 | -0.26634 |
| 222 | H7  | S   | 0.01372  | -0.11491 | -0.06462 | 0.03506  | -0.28097 |
| 223 | H7  | PX  | -0.00073 | 0.00428  | 0.00346  | -0.00686 | 0.00126  |
| 224 | H7  | PY  | 0.00601  | -0.01022 | -0.00381 | 0.00692  | -0.00358 |
| 225 | H7  | PZ  | -0.00290 | -0.00534 | -0.00467 | -0.00492 | 0.01944  |

|              |          |          |          |          |          |
|--------------|----------|----------|----------|----------|----------|
| M0:          | 71       | 72       | 73       | 74       | 75       |
| Eigenvalues: | 0.74659  | 0.74936  | 0.75623  | 0.77139  | 0.78976  |
| (ev):        | 20.31564 | 20.39120 | 20.57810 | 20.99055 | 21.49039 |

|    |    |    |          |          |          |          |          |
|----|----|----|----------|----------|----------|----------|----------|
|    |    | A  | A        | A        | A        | A        |          |
| 1  | H1 | S  | 0.00000  | 0.01786  | 0.04667  | 0.00000  | -0.33877 |
| 2  | H1 | S  | 0.00000  | 0.25864  | 0.15780  | 0.00000  | -0.38812 |
| 3  | H1 | PX | 0.00000  | 0.01043  | 0.00589  | 0.00000  | -0.01791 |
| 4  | H1 | PY | 0.00000  | 0.00294  | 0.00165  | 0.00000  | 0.00102  |
| 5  | H1 | PZ | -0.00619 | 0.00000  | 0.00000  | -0.00128 | 0.00000  |
| 6  | C1 | S  | 0.00000  | 0.00295  | -0.00666 | 0.00000  | -0.04424 |
| 7  | C1 | S  | 0.00000  | 0.18971  | 0.22697  | 0.00000  | -0.21474 |
| 8  | C1 | PX | 0.00000  | -0.08825 | 0.01120  | 0.00000  | -0.08771 |
| 9  | C1 | PY | 0.00000  | -0.14588 | -0.34666 | 0.00000  | -0.13472 |
| 10 | C1 | PZ | -0.13790 | 0.00000  | 0.00000  | -0.02067 | 0.00000  |

|    |    |     |          |          |          |          |          |
|----|----|-----|----------|----------|----------|----------|----------|
| 11 | C1 | S   | 0.00000  | -0.18013 | -0.66310 | 0.00000  | 0.58356  |
| 12 | C1 | PX  | 0.00000  | 0.25814  | -0.01426 | 0.00000  | 0.53620  |
| 13 | C1 | PY  | 0.00000  | -0.97803 | -0.16037 | 0.00000  | -0.33202 |
| 14 | C1 | PZ  | 0.15321  | 0.00000  | 0.00000  | -0.00236 | 0.00000  |
| 15 | C1 | DXX | 0.00000  | 0.01825  | 0.04551  | 0.00000  | -0.07313 |
| 16 | C1 | DYY | 0.00000  | 0.03195  | -0.00609 | 0.00000  | -0.07239 |
| 17 | C1 | DZZ | 0.00000  | 0.00304  | 0.01334  | 0.00000  | 0.03701  |
| 18 | C1 | DXY | 0.00000  | 0.00163  | -0.01295 | 0.00000  | -0.02663 |
| 19 | C1 | DXZ | -0.00189 | 0.00000  | 0.00000  | 0.00180  | 0.00000  |
| 20 | C1 | DYZ | -0.00764 | 0.00000  | 0.00000  | -0.00743 | 0.00000  |
| 21 | C2 | S   | 0.00000  | -0.03906 | 0.06265  | 0.00000  | 0.00416  |
| 22 | C2 | S   | 0.00000  | -0.13306 | 0.00410  | 0.00000  | 0.14159  |
| 23 | C2 | PX  | 0.00000  | 0.10459  | -0.25475 | 0.00000  | 0.11007  |
| 24 | C2 | PY  | 0.00000  | -0.23276 | 0.30301  | 0.00000  | -0.14977 |
| 25 | C2 | PZ  | -0.26567 | 0.00000  | 0.00000  | -0.36375 | 0.00000  |
| 26 | C2 | S   | 0.00000  | 1.01820  | -0.42117 | 0.00000  | -0.10384 |
| 27 | C2 | PX  | 0.00000  | 0.06812  | -0.25035 | 0.00000  | -0.08450 |
| 28 | C2 | PY  | 0.00000  | 2.22504  | -0.70717 | 0.00000  | 0.29131  |
| 29 | C2 | PZ  | 0.18913  | 0.00000  | 0.00000  | 0.33126  | 0.00000  |
| 30 | C2 | DXX | 0.00000  | -0.05115 | 0.05102  | 0.00000  | 0.01539  |
| 31 | C2 | DYY | 0.00000  | -0.03044 | 0.05394  | 0.00000  | 0.05213  |
| 32 | C2 | DZZ | 0.00000  | 0.02321  | -0.05306 | 0.00000  | -0.01351 |
| 33 | C2 | DXY | 0.00000  | -0.01454 | -0.01605 | 0.00000  | -0.00792 |
| 34 | C2 | DXZ | -0.01662 | 0.00000  | 0.00000  | -0.01358 | 0.00000  |
| 35 | C2 | DYZ | -0.01218 | 0.00000  | 0.00000  | -0.02867 | 0.00000  |
| 36 | C3 | S   | 0.00000  | -0.01941 | 0.07731  | 0.00000  | 0.00138  |
| 37 | C3 | S   | 0.00000  | 0.17429  | 0.22161  | 0.00000  | -0.15355 |
| 38 | C3 | PX  | 0.00000  | -0.03611 | 0.17400  | 0.00000  | -0.26829 |
| 39 | C3 | PY  | 0.00000  | -0.06865 | -0.12336 | 0.00000  | -0.23862 |
| 40 | C3 | PZ  | -0.26519 | 0.00000  | 0.00000  | -0.02789 | 0.00000  |
| 41 | C3 | S   | 0.00000  | 1.50361  | -1.29506 | 0.00000  | 0.25350  |
| 42 | C3 | PX  | 0.00000  | -0.97332 | -0.15550 | 0.00000  | -0.03327 |
| 43 | C3 | PY  | 0.00000  | -1.65632 | 0.65957  | 0.00000  | -0.42889 |
| 44 | C3 | PZ  | 0.14269  | 0.00000  | 0.00000  | 0.06319  | 0.00000  |
| 45 | C3 | DXX | 0.00000  | 0.00466  | 0.08622  | 0.00000  | -0.02192 |
| 46 | C3 | DYY | 0.00000  | 0.06131  | 0.07520  | 0.00000  | 0.00199  |
| 47 | C3 | DZZ | 0.00000  | -0.00113 | -0.05252 | 0.00000  | -0.00482 |
| 48 | C3 | DXY | 0.00000  | 0.01593  | 0.00006  | 0.00000  | 0.05169  |
| 49 | C3 | DXZ | -0.00580 | 0.00000  | 0.00000  | 0.01678  | 0.00000  |
| 50 | C3 | DYZ | 0.02275  | 0.00000  | 0.00000  | -0.01582 | 0.00000  |
| 51 | C4 | S   | 0.00000  | 0.03318  | -0.00644 | 0.00000  | 0.02109  |
| 52 | C4 | S   | 0.00000  | -0.11281 | -0.16887 | 0.00000  | -0.45775 |
| 53 | C4 | PX  | 0.00000  | 0.16508  | 0.00585  | 0.00000  | -0.16318 |
| 54 | C4 | PY  | 0.00000  | -0.08252 | -0.12508 | 0.00000  | -0.28989 |
| 55 | C4 | PZ  | -0.00708 | 0.00000  | 0.00000  | -0.21618 | 0.00000  |
| 56 | C4 | S   | 0.00000  | 0.33029  | 0.27333  | 0.00000  | 0.98382  |
| 57 | C4 | PX  | 0.00000  | 0.80911  | 0.61746  | 0.00000  | 0.40337  |
| 58 | C4 | PY  | 0.00000  | -0.19591 | 0.52436  | 0.00000  | 0.08768  |
| 59 | C4 | PZ  | -0.11190 | 0.00000  | 0.00000  | 0.15656  | 0.00000  |
| 60 | C4 | DXX | 0.00000  | 0.04429  | -0.06945 | 0.00000  | -0.02809 |
| 61 | C4 | DYY | 0.00000  | 0.00771  | 0.01824  | 0.00000  | 0.01041  |
| 62 | C4 | DZZ | 0.00000  | -0.02975 | 0.00185  | 0.00000  | -0.02739 |
| 63 | C4 | DXY | 0.00000  | 0.04418  | 0.02322  | 0.00000  | 0.00091  |
| 64 | C4 | DXZ | -0.01448 | 0.00000  | 0.00000  | 0.00587  | 0.00000  |

|     |    |     |          |          |          |          |          |
|-----|----|-----|----------|----------|----------|----------|----------|
| 65  | C4 | DYZ | 0.00626  | 0.00000  | 0.00000  | -0.00011 | 0.00000  |
| 66  | C5 | S   | 0.00000  | -0.02105 | -0.01475 | 0.00000  | -0.00715 |
| 67  | C5 | S   | 0.00000  | -0.00781 | 0.20775  | 0.00000  | 0.07749  |
| 68  | C5 | PX  | 0.00000  | 0.35951  | -0.15337 | 0.00000  | 0.08008  |
| 69  | C5 | PY  | 0.00000  | 0.25831  | -0.22839 | 0.00000  | -0.07583 |
| 70  | C5 | PZ  | -0.27032 | 0.00000  | 0.00000  | -0.39111 | 0.00000  |
| 71  | C5 | S   | 0.00000  | -1.24815 | 0.70698  | 0.00000  | -0.12047 |
| 72  | C5 | PX  | 0.00000  | 0.38958  | 0.63800  | 0.00000  | -0.18167 |
| 73  | C5 | PY  | 0.00000  | 1.00719  | -0.09551 | 0.00000  | 0.27317  |
| 74  | C5 | PZ  | 0.25202  | 0.00000  | 0.00000  | 0.32177  | 0.00000  |
| 75  | C5 | DXX | 0.00000  | -0.04017 | 0.03173  | 0.00000  | 0.01751  |
| 76  | C5 | DYY | 0.00000  | -0.04493 | 0.01267  | 0.00000  | -0.02845 |
| 77  | C5 | DZZ | 0.00000  | 0.03737  | 0.00331  | 0.00000  | 0.01220  |
| 78  | C5 | DXY | 0.00000  | 0.00702  | 0.01479  | 0.00000  | -0.00973 |
| 79  | C5 | DXZ | 0.00728  | 0.00000  | 0.00000  | -0.00680 | 0.00000  |
| 80  | C5 | DYZ | 0.01995  | 0.00000  | 0.00000  | 0.02882  | 0.00000  |
| 81  | C6 | S   | 0.00000  | 0.02909  | -0.07405 | 0.00000  | 0.02788  |
| 82  | C6 | S   | 0.00000  | -0.11572 | 0.37076  | 0.00000  | 0.29849  |
| 83  | C6 | PX  | 0.00000  | -0.06517 | 0.04683  | 0.00000  | -0.03619 |
| 84  | C6 | PY  | 0.00000  | 0.03806  | 0.30733  | 0.00000  | 0.09183  |
| 85  | C6 | PZ  | -0.28922 | 0.00000  | 0.00000  | -0.04337 | 0.00000  |
| 86  | C6 | S   | 0.00000  | -0.03697 | -0.07768 | 0.00000  | -1.23083 |
| 87  | C6 | PX  | 0.00000  | -1.69422 | 0.31665  | 0.00000  | -0.22166 |
| 88  | C6 | PY  | 0.00000  | -0.63205 | 0.10215  | 0.00000  | 0.55391  |
| 89  | C6 | PZ  | 0.21552  | 0.00000  | 0.00000  | -0.03109 | 0.00000  |
| 90  | C6 | DXX | 0.00000  | 0.02883  | 0.00062  | 0.00000  | 0.09978  |
| 91  | C6 | DYY | 0.00000  | -0.01194 | -0.01906 | 0.00000  | -0.00828 |
| 92  | C6 | DZZ | 0.00000  | -0.01264 | 0.04237  | 0.00000  | -0.01246 |
| 93  | C6 | DXY | 0.00000  | -0.03877 | 0.03541  | 0.00000  | -0.00772 |
| 94  | C6 | DXZ | 0.00153  | 0.00000  | 0.00000  | -0.00610 | 0.00000  |
| 95  | C6 | DYZ | 0.00090  | 0.00000  | 0.00000  | -0.01170 | 0.00000  |
| 96  | C7 | S   | 0.00000  | 0.05252  | -0.00042 | 0.00000  | -0.00480 |
| 97  | C7 | S   | 0.00000  | 0.03147  | 0.25086  | 0.00000  | -0.27617 |
| 98  | C7 | PX  | 0.00000  | 0.10139  | -0.03520 | 0.00000  | 0.01647  |
| 99  | C7 | PY  | 0.00000  | 0.15158  | 0.36029  | 0.00000  | -0.12944 |
| 100 | C7 | PZ  | -0.31421 | 0.00000  | 0.00000  | 0.46153  | 0.00000  |
| 101 | C7 | S   | 0.00000  | -1.89340 | 0.57830  | 0.00000  | 0.23888  |
| 102 | C7 | PX  | 0.00000  | 1.61096  | -0.39612 | 0.00000  | 0.30806  |
| 103 | C7 | PY  | 0.00000  | -0.05182 | -0.08851 | 0.00000  | 0.03717  |
| 104 | C7 | PZ  | 0.26234  | 0.00000  | 0.00000  | -0.38629 | 0.00000  |
| 105 | C7 | DXX | 0.00000  | 0.06418  | 0.04741  | 0.00000  | -0.01315 |
| 106 | C7 | DYY | 0.00000  | -0.02643 | 0.04027  | 0.00000  | -0.04424 |
| 107 | C7 | DZZ | 0.00000  | -0.02317 | -0.01778 | 0.00000  | -0.00934 |
| 108 | C7 | DXY | 0.00000  | -0.01101 | 0.01148  | 0.00000  | -0.01733 |
| 109 | C7 | DXZ | 0.02040  | 0.00000  | 0.00000  | -0.01090 | 0.00000  |
| 110 | C7 | DYZ | -0.01302 | 0.00000  | 0.00000  | 0.00037  | 0.00000  |
| 111 | O1 | S   | 0.00000  | -0.01422 | 0.00294  | 0.00000  | -0.01105 |
| 112 | O1 | S   | 0.00000  | 0.11774  | 0.00883  | 0.00000  | 0.07925  |
| 113 | O1 | PX  | 0.00000  | 0.15663  | 0.11156  | 0.00000  | -0.08539 |
| 114 | O1 | PY  | 0.00000  | -0.02240 | -0.01012 | 0.00000  | -0.08217 |
| 115 | O1 | PZ  | 0.10989  | 0.00000  | 0.00000  | 0.01526  | 0.00000  |
| 116 | O1 | S   | 0.00000  | -0.38667 | -0.41096 | 0.00000  | -0.12953 |
| 117 | O1 | PX  | 0.00000  | -0.17666 | -0.08784 | 0.00000  | -0.03609 |
| 118 | O1 | PY  | 0.00000  | -0.09418 | 0.19575  | 0.00000  | 0.09936  |

|     |     |     |          |          |          |          |          |
|-----|-----|-----|----------|----------|----------|----------|----------|
| 119 | O1  | PZ  | 0.17474  | 0.00000  | 0.00000  | 0.03723  | 0.00000  |
| 120 | O1  | DXX | 0.00000  | -0.03103 | -0.01722 | 0.00000  | 0.06269  |
| 121 | O1  | DYY | 0.00000  | -0.00555 | -0.04652 | 0.00000  | -0.05735 |
| 122 | O1  | DZZ | 0.00000  | 0.05339  | 0.02973  | 0.00000  | 0.03499  |
| 123 | O1  | DXY | 0.00000  | -0.07272 | -0.03263 | 0.00000  | 0.00006  |
| 124 | O1  | DXZ | 0.01078  | 0.00000  | 0.00000  | -0.00032 | 0.00000  |
| 125 | O1  | DYZ | -0.01093 | 0.00000  | 0.00000  | 0.00823  | 0.00000  |
| 126 | H4  | S   | 0.00000  | -0.17371 | 0.01827  | 0.00000  | -0.07669 |
| 127 | H4  | S   | 0.00000  | -0.04965 | 0.29580  | 0.00000  | -0.15551 |
| 128 | H4  | PX  | 0.00000  | 0.01262  | 0.01047  | 0.00000  | -0.00451 |
| 129 | H4  | PY  | 0.00000  | -0.01004 | 0.00841  | 0.00000  | -0.00030 |
| 130 | H4  | PZ  | -0.00373 | 0.00000  | 0.00000  | -0.00125 | 0.00000  |
| 131 | N1  | S   | 0.00000  | 0.00707  | -0.00164 | 0.00000  | -0.00874 |
| 132 | N1  | S   | 0.00000  | 0.01531  | -0.09166 | 0.00000  | 0.02701  |
| 133 | N1  | PX  | 0.00000  | -0.10136 | -0.01403 | 0.00000  | -0.15133 |
| 134 | N1  | PY  | 0.00000  | -0.04224 | -0.13857 | 0.00000  | -0.01193 |
| 135 | N1  | PZ  | -0.08089 | 0.00000  | 0.00000  | 0.08546  | 0.00000  |
| 136 | N1  | S   | 0.00000  | -0.76198 | 0.52654  | 0.00000  | 0.57432  |
| 137 | N1  | PX  | 0.00000  | 0.06385  | 0.12382  | 0.00000  | -0.01809 |
| 138 | N1  | PY  | 0.00000  | -0.31884 | 0.30071  | 0.00000  | 0.57721  |
| 139 | N1  | PZ  | 0.00180  | 0.00000  | 0.00000  | 0.02094  | 0.00000  |
| 140 | N1  | DXX | 0.00000  | 0.02142  | 0.00522  | 0.00000  | 0.03358  |
| 141 | N1  | DYY | 0.00000  | -0.02578 | -0.00933 | 0.00000  | 0.02857  |
| 142 | N1  | DZZ | 0.00000  | 0.01694  | -0.02578 | 0.00000  | -0.01779 |
| 143 | N1  | DXY | 0.00000  | 0.01225  | -0.02550 | 0.00000  | -0.01648 |
| 144 | N1  | DXZ | -0.00808 | 0.00000  | 0.00000  | -0.00045 | 0.00000  |
| 145 | N1  | DYZ | -0.01897 | 0.00000  | 0.00000  | 0.00181  | 0.00000  |
| 146 | H6  | S   | 0.00000  | -0.17789 | 0.17405  | 0.00000  | -0.01821 |
| 147 | H6  | S   | 0.00000  | 0.31468  | -0.27155 | 0.00000  | 0.08003  |
| 148 | H6  | PX  | 0.00000  | 0.01253  | -0.01309 | 0.00000  | -0.00636 |
| 149 | H6  | PY  | 0.00000  | 0.01767  | -0.00534 | 0.00000  | 0.00360  |
| 150 | H6  | PZ  | -0.00108 | 0.00000  | 0.00000  | -0.00212 | 0.00000  |
| 151 | C8  | S   | 0.00000  | -0.02783 | -0.01809 | 0.00000  | -0.01677 |
| 152 | C8  | S   | 0.00000  | 0.04108  | 0.18952  | 0.00000  | -0.04256 |
| 153 | C8  | PX  | 0.00000  | 0.02424  | -0.05352 | 0.00000  | -0.21254 |
| 154 | C8  | PY  | 0.00000  | 0.02849  | 0.10280  | 0.00000  | -0.01250 |
| 155 | C8  | PZ  | -0.20251 | 0.00000  | 0.00000  | 0.32522  | 0.00000  |
| 156 | C8  | S   | 0.00000  | 0.68604  | -0.50138 | 0.00000  | 0.23690  |
| 157 | C8  | PX  | 0.00000  | 0.30456  | 0.12555  | 0.00000  | -0.09083 |
| 158 | C8  | PY  | 0.00000  | 1.41085  | -0.36785 | 0.00000  | 0.09925  |
| 159 | C8  | PZ  | 0.10206  | 0.00000  | 0.00000  | -0.22853 | 0.00000  |
| 160 | C8  | DXX | 0.00000  | -0.02451 | 0.00652  | 0.00000  | -0.01733 |
| 161 | C8  | DYY | 0.00000  | 0.01935  | -0.01194 | 0.00000  | -0.00877 |
| 162 | C8  | DZZ | 0.00000  | 0.01163  | 0.01788  | 0.00000  | 0.00752  |
| 163 | C8  | DXY | 0.00000  | -0.03008 | -0.00836 | 0.00000  | 0.01759  |
| 164 | C8  | DXZ | -0.00820 | 0.00000  | 0.00000  | 0.01648  | 0.00000  |
| 165 | C8  | DYZ | 0.01074  | 0.00000  | 0.00000  | -0.02827 | 0.00000  |
| 166 | H8  | S   | 0.00000  | 0.22018  | 0.05915  | 0.00000  | -0.08471 |
| 167 | H8  | S   | 0.00000  | -0.88019 | 0.11050  | 0.00000  | -0.30648 |
| 168 | H8  | PX  | 0.00000  | 0.01775  | 0.00969  | 0.00000  | -0.00155 |
| 169 | H8  | PY  | 0.00000  | -0.00400 | 0.00009  | 0.00000  | -0.00174 |
| 170 | H8  | PZ  | -0.00336 | 0.00000  | 0.00000  | 0.00920  | 0.00000  |
| 171 | C10 | S   | 0.00000  | 0.00318  | 0.00366  | 0.00000  | 0.00044  |
| 172 | C10 | S   | 0.00000  | 0.01084  | -0.02804 | 0.00000  | -0.06510 |

|     |     |     |          |          |          |          |          |
|-----|-----|-----|----------|----------|----------|----------|----------|
| 173 | C10 | PX  | 0.00000  | -0.06136 | -0.04517 | 0.00000  | -0.04914 |
| 174 | C10 | PY  | 0.00000  | 0.06382  | -0.09214 | 0.00000  | -0.05434 |
| 175 | C10 | PZ  | -0.28450 | 0.00000  | 0.00000  | 0.64844  | 0.00000  |
| 176 | C10 | S   | 0.00000  | 0.69607  | -0.13941 | 0.00000  | 0.08103  |
| 177 | C10 | PX  | 0.00000  | -0.20092 | 0.10698  | 0.00000  | 0.22343  |
| 178 | C10 | PY  | 0.00000  | 0.21825  | 0.13750  | 0.00000  | 0.20121  |
| 179 | C10 | PZ  | 0.26010  | 0.00000  | 0.00000  | -0.58269 | 0.00000  |
| 180 | C10 | DXX | 0.00000  | -0.00751 | -0.00641 | 0.00000  | -0.00382 |
| 181 | C10 | DYY | 0.00000  | 0.01633  | 0.00914  | 0.00000  | -0.00854 |
| 182 | C10 | DZZ | 0.00000  | 0.00244  | -0.00517 | 0.00000  | -0.00061 |
| 183 | C10 | DXY | 0.00000  | 0.02767  | 0.02619  | 0.00000  | -0.00579 |
| 184 | C10 | DXZ | 0.00630  | 0.00000  | 0.00000  | -0.01044 | 0.00000  |
| 185 | C10 | DYZ | -0.01699 | 0.00000  | 0.00000  | 0.02751  | 0.00000  |
| 186 | H16 | S   | 0.00000  | -0.07778 | -0.05736 | 0.00000  | -0.01368 |
| 187 | H16 | S   | 0.00000  | 0.19577  | 0.03101  | 0.00000  | -0.11026 |
| 188 | H16 | PX  | 0.00000  | 0.00461  | 0.00108  | 0.00000  | 0.00528  |
| 189 | H16 | PY  | 0.00000  | 0.00410  | 0.00813  | 0.00000  | 0.00409  |
| 190 | H16 | PZ  | -0.00341 | 0.00000  | 0.00000  | 0.00925  | 0.00000  |
| 191 | H18 | S   | 0.00000  | 0.08509  | 0.11536  | 0.00000  | 0.03244  |
| 192 | H18 | S   | 0.00000  | -0.12631 | 0.02167  | 0.00000  | 0.20076  |
| 193 | H18 | PX  | 0.00000  | -0.00009 | 0.00518  | 0.00000  | 0.00710  |
| 194 | H18 | PY  | 0.00000  | -0.01243 | -0.00665 | 0.00000  | -0.00141 |
| 195 | H18 | PZ  | -0.00512 | 0.00000  | 0.00000  | 0.01215  | 0.00000  |
| 196 | C9  | S   | 0.00000  | 0.01713  | 0.01140  | 0.00000  | 0.00643  |
| 197 | C9  | S   | 0.00000  | -0.21008 | -0.09373 | 0.00000  | 0.04466  |
| 198 | C9  | PX  | 0.00000  | 0.44790  | 0.16778  | 0.00000  | -0.19420 |
| 199 | C9  | PY  | 0.00000  | 0.13925  | 0.09299  | 0.00000  | 0.18039  |
| 200 | C9  | PZ  | 0.51230  | 0.00000  | 0.00000  | 0.16317  | 0.00000  |
| 201 | C9  | S   | 0.00000  | 0.35114  | 0.11523  | 0.00000  | -0.13970 |
| 202 | C9  | PX  | 0.00000  | -0.69038 | -0.09987 | 0.00000  | 0.41417  |
| 203 | C9  | PY  | 0.00000  | -0.07685 | -0.00533 | 0.00000  | -0.39658 |
| 204 | C9  | PZ  | -1.21351 | 0.00000  | 0.00000  | -0.38146 | 0.00000  |
| 205 | C9  | DXX | 0.00000  | 0.02163  | 0.00539  | 0.00000  | -0.03861 |
| 206 | C9  | DYY | 0.00000  | -0.01038 | 0.02469  | 0.00000  | 0.10200  |
| 207 | C9  | DZZ | 0.00000  | -0.01177 | -0.02300 | 0.00000  | -0.04292 |
| 208 | C9  | DXY | 0.00000  | 0.04128  | 0.02606  | 0.00000  | -0.00153 |
| 209 | C9  | DXZ | 0.03546  | 0.00000  | 0.00000  | 0.01087  | 0.00000  |
| 210 | C9  | DYZ | -0.04599 | 0.00000  | 0.00000  | -0.01677 | 0.00000  |
| 211 | H3  | S   | 0.00000  | -0.01034 | 0.06264  | 0.00000  | 0.33631  |
| 212 | H3  | S   | 0.00000  | -0.10329 | -0.13773 | 0.00000  | -0.07031 |
| 213 | H3  | PX  | 0.00000  | 0.01506  | 0.00940  | 0.00000  | 0.00911  |
| 214 | H3  | PY  | 0.00000  | 0.00465  | 0.00455  | 0.00000  | 0.00486  |
| 215 | H3  | PZ  | -0.02192 | 0.00000  | 0.00000  | -0.00833 | 0.00000  |
| 216 | H5  | S   | -0.29670 | 0.05861  | -0.03654 | -0.09153 | -0.16146 |
| 217 | H5  | S   | -0.25033 | 0.04521  | -0.00697 | -0.06997 | 0.02982  |
| 218 | H5  | PX  | 0.00946  | 0.00260  | 0.00059  | 0.00418  | -0.00024 |
| 219 | H5  | PY  | 0.00277  | 0.01319  | -0.00128 | 0.00239  | -0.02371 |
| 220 | H5  | PZ  | -0.02735 | 0.00731  | 0.00747  | -0.00903 | 0.00242  |
| 221 | H7  | S   | 0.29670  | 0.05861  | -0.03654 | 0.09153  | -0.16146 |
| 222 | H7  | S   | 0.25033  | 0.04521  | -0.00697 | 0.06997  | 0.02982  |
| 223 | H7  | PX  | -0.00946 | 0.00260  | 0.00059  | -0.00418 | -0.00024 |
| 224 | H7  | PY  | -0.00277 | 0.01319  | -0.00128 | -0.00239 | -0.02371 |
| 225 | H7  | PZ  | -0.02735 | -0.00731 | -0.00747 | -0.00903 | -0.00242 |

|              |          |          |          |          |          |
|--------------|----------|----------|----------|----------|----------|
| MO:          | 76       | 77       | 78       | 79       | 80       |
| Eigenvalues: | 0.79398  | 0.81386  | 0.81512  | 0.81972  | 0.84843  |
| (ev):        | 21.60542 | 22.14624 | 22.18057 | 22.30575 | 23.08688 |

|    |    | A   | A        | A        | A        | A        |          |
|----|----|-----|----------|----------|----------|----------|----------|
| 1  | H1 | S   | 0.02840  | 0.00000  | -0.02220 | 0.13827  | 0.00000  |
| 2  | H1 | S   | 0.03542  | 0.00000  | -0.08125 | -0.11507 | 0.00000  |
| 3  | H1 | PX  | 0.00215  | 0.00000  | -0.00685 | 0.00359  | 0.00000  |
| 4  | H1 | PY  | 0.00859  | 0.00000  | 0.01078  | 0.00794  | 0.00000  |
| 5  | H1 | PZ  | 0.00000  | -0.00455 | 0.00000  | 0.00000  | -0.00116 |
| 6  | C1 | S   | -0.02650 | 0.00000  | 0.00384  | 0.03057  | 0.00000  |
| 7  | C1 | S   | 0.00182  | 0.00000  | -0.34518 | -0.17788 | 0.00000  |
| 8  | C1 | PX  | -0.08284 | 0.00000  | 0.05447  | 0.12238  | 0.00000  |
| 9  | C1 | PY  | 0.00609  | 0.00000  | 0.11568  | 0.11422  | 0.00000  |
| 10 | C1 | PZ  | 0.00000  | -0.59400 | 0.00000  | 0.00000  | -0.30439 |
| 11 | C1 | S   | 0.71472  | 0.00000  | 0.62580  | 0.25262  | 0.00000  |
| 12 | C1 | PX  | -0.39540 | 0.00000  | -0.21370 | -0.08153 | 0.00000  |
| 13 | C1 | PY  | 0.31985  | 0.00000  | 0.20750  | -0.10674 | 0.00000  |
| 14 | C1 | PZ  | 0.00000  | 0.60741  | 0.00000  | 0.00000  | 0.29751  |
| 15 | C1 | DXX | -0.00109 | 0.00000  | -0.02891 | 0.03974  | 0.00000  |
| 16 | C1 | DYY | -0.01808 | 0.00000  | -0.03533 | -0.01918 | 0.00000  |
| 17 | C1 | DZZ | 0.00980  | 0.00000  | -0.01037 | -0.02617 | 0.00000  |
| 18 | C1 | DXY | 0.04578  | 0.00000  | 0.00179  | -0.00900 | 0.00000  |
| 19 | C1 | DXZ | 0.00000  | 0.02903  | 0.00000  | 0.00000  | 0.02749  |
| 20 | C1 | DYZ | 0.00000  | 0.00749  | 0.00000  | 0.00000  | -0.01865 |
| 21 | C2 | S   | 0.00246  | 0.00000  | -0.02105 | -0.01981 | 0.00000  |
| 22 | C2 | S   | 0.42459  | 0.00000  | 0.29734  | 0.06648  | 0.00000  |
| 23 | C2 | PX  | 0.13939  | 0.00000  | -0.03542 | 0.03984  | 0.00000  |
| 24 | C2 | PY  | -0.05631 | 0.00000  | 0.30941  | -0.10373 | 0.00000  |
| 25 | C2 | PZ  | 0.00000  | 0.39949  | 0.00000  | 0.00000  | 0.34998  |
| 26 | C2 | S   | -0.73535 | 0.00000  | 0.55690  | 0.35392  | 0.00000  |
| 27 | C2 | PX  | 0.13231  | 0.00000  | 0.51129  | 0.51342  | 0.00000  |
| 28 | C2 | PY  | -0.38125 | 0.00000  | 0.53304  | 0.32520  | 0.00000  |
| 29 | C2 | PZ  | 0.00000  | -0.36451 | 0.00000  | 0.00000  | -0.34422 |
| 30 | C2 | DXX | 0.04130  | 0.00000  | 0.04651  | -0.02133 | 0.00000  |
| 31 | C2 | DYY | 0.05534  | 0.00000  | 0.00926  | 0.03181  | 0.00000  |
| 32 | C2 | DZZ | 0.00293  | 0.00000  | 0.00456  | 0.00804  | 0.00000  |
| 33 | C2 | DXY | -0.00193 | 0.00000  | -0.02521 | 0.00105  | 0.00000  |
| 34 | C2 | DXZ | 0.00000  | 0.02436  | 0.00000  | 0.00000  | 0.02197  |
| 35 | C2 | DYZ | 0.00000  | 0.02176  | 0.00000  | 0.00000  | -0.02819 |
| 36 | C3 | S   | 0.01658  | 0.00000  | -0.05583 | -0.06316 | 0.00000  |
| 37 | C3 | S   | 0.02811  | 0.00000  | -0.30291 | 0.37524  | 0.00000  |
| 38 | C3 | PX  | -0.27998 | 0.00000  | 0.13563  | 0.09471  | 0.00000  |
| 39 | C3 | PY  | 0.06304  | 0.00000  | 0.04101  | -0.16229 | 0.00000  |
| 40 | C3 | PZ  | 0.00000  | -0.28737 | 0.00000  | 0.00000  | 0.21913  |
| 41 | C3 | S   | -1.35894 | 0.00000  | 1.60593  | 0.69218  | 0.00000  |
| 42 | C3 | PX  | -0.19306 | 0.00000  | 0.11486  | -0.13526 | 0.00000  |
| 43 | C3 | PY  | 0.68377  | 0.00000  | -0.66720 | -0.32876 | 0.00000  |
| 44 | C3 | PZ  | 0.00000  | 0.15150  | 0.00000  | 0.00000  | -0.18422 |
| 45 | C3 | DXX | -0.02329 | 0.00000  | -0.06502 | 0.03381  | 0.00000  |
| 46 | C3 | DYY | 0.00913  | 0.00000  | -0.07191 | -0.01933 | 0.00000  |
| 47 | C3 | DZZ | 0.01050  | 0.00000  | 0.03372  | 0.02682  | 0.00000  |
| 48 | C3 | DXY | -0.03146 | 0.00000  | 0.01258  | 0.02477  | 0.00000  |
| 49 | C3 | DXZ | 0.00000  | -0.00260 | 0.00000  | 0.00000  | -0.00812 |

|     |    |     |          |          |          |          |          |
|-----|----|-----|----------|----------|----------|----------|----------|
| 50  | C3 | DYZ | 0.00000  | -0.00154 | 0.00000  | 0.00000  | -0.01821 |
| 51  | C4 | S   | 0.00632  | 0.00000  | -0.01025 | -0.01935 | 0.00000  |
| 52  | C4 | S   | 0.03072  | 0.00000  | 0.12745  | -0.30071 | 0.00000  |
| 53  | C4 | PX  | -0.23354 | 0.00000  | -0.35787 | -0.00115 | 0.00000  |
| 54  | C4 | PY  | 0.05978  | 0.00000  | -0.24421 | -0.37485 | 0.00000  |
| 55  | C4 | PZ  | 0.00000  | -0.02103 | 0.00000  | 0.00000  | -0.42796 |
| 56  | C4 | S   | -0.16443 | 0.00000  | -0.52527 | 0.66870  | 0.00000  |
| 57  | C4 | PX  | -0.56683 | 0.00000  | 0.00133  | -0.22838 | 0.00000  |
| 58  | C4 | PY  | 0.56211  | 0.00000  | -0.19709 | 0.40413  | 0.00000  |
| 59  | C4 | PZ  | 0.00000  | 0.00723  | 0.00000  | 0.00000  | 0.44037  |
| 60  | C4 | DXX | 0.01552  | 0.00000  | -0.01237 | -0.09334 | 0.00000  |
| 61  | C4 | DYY | 0.01088  | 0.00000  | 0.01284  | 0.02129  | 0.00000  |
| 62  | C4 | DZZ | 0.00014  | 0.00000  | 0.01580  | 0.00653  | 0.00000  |
| 63  | C4 | DXY | -0.00045 | 0.00000  | 0.01163  | 0.01076  | 0.00000  |
| 64  | C4 | DXZ | 0.00000  | -0.03801 | 0.00000  | 0.00000  | -0.00303 |
| 65  | C4 | DYZ | 0.00000  | 0.02438  | 0.00000  | 0.00000  | 0.02415  |
| 66  | C5 | S   | 0.02072  | 0.00000  | 0.08017  | 0.01417  | 0.00000  |
| 67  | C5 | S   | 0.27094  | 0.00000  | 0.23584  | -0.22059 | 0.00000  |
| 68  | C5 | PX  | -0.03198 | 0.00000  | -0.17934 | -0.21673 | 0.00000  |
| 69  | C5 | PY  | -0.02721 | 0.00000  | 0.05375  | -0.06915 | 0.00000  |
| 70  | C5 | PZ  | 0.00000  | 0.26688  | 0.00000  | 0.00000  | -0.33736 |
| 71  | C5 | S   | -0.36082 | 0.00000  | -1.49611 | -0.31082 | 0.00000  |
| 72  | C5 | PX  | -0.32577 | 0.00000  | 0.13141  | -0.07889 | 0.00000  |
| 73  | C5 | PY  | -0.52719 | 0.00000  | 0.73648  | 0.34140  | 0.00000  |
| 74  | C5 | PZ  | 0.00000  | -0.27442 | 0.00000  | 0.00000  | 0.32998  |
| 75  | C5 | DXX | 0.04238  | 0.00000  | 0.09981  | -0.01100 | 0.00000  |
| 76  | C5 | DYY | 0.04448  | 0.00000  | 0.08961  | -0.04735 | 0.00000  |
| 77  | C5 | DZZ | -0.01265 | 0.00000  | -0.06081 | -0.00580 | 0.00000  |
| 78  | C5 | DXY | 0.00318  | 0.00000  | 0.00220  | -0.02829 | 0.00000  |
| 79  | C5 | DXZ | 0.00000  | 0.01324  | 0.00000  | 0.00000  | -0.02112 |
| 80  | C5 | DYZ | 0.00000  | -0.03595 | 0.00000  | 0.00000  | -0.01259 |
| 81  | C6 | S   | 0.02314  | 0.00000  | -0.00331 | 0.02492  | 0.00000  |
| 82  | C6 | S   | 0.24805  | 0.00000  | -0.27694 | 0.23650  | 0.00000  |
| 83  | C6 | PX  | -0.13659 | 0.00000  | -0.14130 | -0.05060 | 0.00000  |
| 84  | C6 | PY  | -0.17443 | 0.00000  | 0.06973  | -0.27843 | 0.00000  |
| 85  | C6 | PZ  | 0.00000  | 0.07776  | 0.00000  | 0.00000  | 0.48543  |
| 86  | C6 | S   | -0.09771 | 0.00000  | 0.18065  | -0.68935 | 0.00000  |
| 87  | C6 | PX  | 0.41986  | 0.00000  | -0.19137 | -0.16602 | 0.00000  |
| 88  | C6 | PY  | -0.21704 | 0.00000  | -0.36112 | -0.13320 | 0.00000  |
| 89  | C6 | PZ  | 0.00000  | -0.07347 | 0.00000  | 0.00000  | -0.47453 |
| 90  | C6 | DXX | 0.05608  | 0.00000  | -0.06802 | 0.05182  | 0.00000  |
| 91  | C6 | DYY | 0.03906  | 0.00000  | -0.02251 | 0.01894  | 0.00000  |
| 92  | C6 | DZZ | -0.01501 | 0.00000  | 0.00820  | -0.01274 | 0.00000  |
| 93  | C6 | DXY | -0.00642 | 0.00000  | -0.00707 | 0.00341  | 0.00000  |
| 94  | C6 | DXZ | 0.00000  | -0.01643 | 0.00000  | 0.00000  | -0.00734 |
| 95  | C6 | DYZ | 0.00000  | -0.00284 | 0.00000  | 0.00000  | 0.01865  |
| 96  | C7 | S   | -0.03668 | 0.00000  | 0.02300  | 0.08130  | 0.00000  |
| 97  | C7 | S   | -0.29411 | 0.00000  | -0.05353 | 0.19937  | 0.00000  |
| 98  | C7 | PX  | 0.04490  | 0.00000  | 0.02113  | 0.10928  | 0.00000  |
| 99  | C7 | PY  | 0.21340  | 0.00000  | -0.27114 | -0.10568 | 0.00000  |
| 100 | C7 | PZ  | 0.00000  | -0.40536 | 0.00000  | 0.00000  | 0.21539  |
| 101 | C7 | S   | 1.40513  | 0.00000  | -1.10053 | -1.31108 | 0.00000  |
| 102 | C7 | PX  | -0.69500 | 0.00000  | 0.64875  | 0.46094  | 0.00000  |
| 103 | C7 | PY  | 0.71217  | 0.00000  | -0.23841 | 0.00825  | 0.00000  |

|     |    |     |          |          |          |          |          |
|-----|----|-----|----------|----------|----------|----------|----------|
| 104 | C7 | PZ  | 0.00000  | 0.48071  | 0.00000  | 0.00000  | -0.14824 |
| 105 | C7 | DXX | -0.08594 | 0.00000  | 0.00757  | 0.07973  | 0.00000  |
| 106 | C7 | DYY | -0.03001 | 0.00000  | -0.01342 | 0.10492  | 0.00000  |
| 107 | C7 | DZZ | 0.01954  | 0.00000  | 0.00338  | -0.05519 | 0.00000  |
| 108 | C7 | DXY | 0.01884  | 0.00000  | -0.01828 | 0.00312  | 0.00000  |
| 109 | C7 | DXZ | 0.00000  | 0.02906  | 0.00000  | 0.00000  | -0.00720 |
| 110 | C7 | DYZ | 0.00000  | -0.00059 | 0.00000  | 0.00000  | 0.00013  |
| 111 | O1 | S   | 0.00032  | 0.00000  | -0.02172 | -0.00459 | 0.00000  |
| 112 | O1 | S   | 0.08432  | 0.00000  | 0.13436  | 0.02993  | 0.00000  |
| 113 | O1 | PX  | 0.16872  | 0.00000  | 0.18121  | 0.04093  | 0.00000  |
| 114 | O1 | PY  | 0.04880  | 0.00000  | 0.02651  | -0.11391 | 0.00000  |
| 115 | O1 | PZ  | 0.00000  | -0.01266 | 0.00000  | 0.00000  | -0.08163 |
| 116 | O1 | S   | -0.53726 | 0.00000  | -0.14228 | -0.27372 | 0.00000  |
| 117 | O1 | PX  | 0.02396  | 0.00000  | -0.10484 | 0.06555  | 0.00000  |
| 118 | O1 | PY  | 0.08550  | 0.00000  | -0.22172 | 0.05775  | 0.00000  |
| 119 | O1 | PZ  | 0.00000  | 0.03108  | 0.00000  | 0.00000  | 0.03991  |
| 120 | O1 | DXX | -0.03552 | 0.00000  | -0.02867 | 0.02386  | 0.00000  |
| 121 | O1 | DYY | 0.01809  | 0.00000  | 0.00275  | -0.08048 | 0.00000  |
| 122 | O1 | DZZ | 0.04770  | 0.00000  | 0.05414  | 0.04070  | 0.00000  |
| 123 | O1 | DXY | -0.03289 | 0.00000  | -0.03882 | -0.00906 | 0.00000  |
| 124 | O1 | DXZ | 0.00000  | 0.01784  | 0.00000  | 0.00000  | 0.00520  |
| 125 | O1 | DYZ | 0.00000  | -0.00539 | 0.00000  | 0.00000  | 0.01154  |
| 126 | H4 | S   | 0.08880  | 0.00000  | 0.28539  | 0.01787  | 0.00000  |
| 127 | H4 | S   | 0.12619  | 0.00000  | -0.15453 | -0.28611 | 0.00000  |
| 128 | H4 | PX  | -0.00310 | 0.00000  | -0.00473 | 0.00609  | 0.00000  |
| 129 | H4 | PY  | 0.00465  | 0.00000  | 0.01932  | 0.00220  | 0.00000  |
| 130 | H4 | PZ  | 0.00000  | -0.00595 | 0.00000  | 0.00000  | -0.00393 |
| 131 | N1 | S   | 0.00403  | 0.00000  | -0.00089 | 0.01267  | 0.00000  |
| 132 | N1 | S   | 0.00089  | 0.00000  | 0.03261  | -0.04696 | 0.00000  |
| 133 | N1 | PX  | 0.04230  | 0.00000  | 0.02997  | -0.04100 | 0.00000  |
| 134 | N1 | PY  | 0.06357  | 0.00000  | -0.03564 | 0.12805  | 0.00000  |
| 135 | N1 | PZ  | 0.00000  | 0.13439  | 0.00000  | 0.00000  | 0.13369  |
| 136 | N1 | S   | -0.04827 | 0.00000  | -0.42442 | 0.05288  | 0.00000  |
| 137 | N1 | PX  | 0.08685  | 0.00000  | -0.11865 | 0.13840  | 0.00000  |
| 138 | N1 | PY  | -0.29893 | 0.00000  | -0.12868 | -0.30033 | 0.00000  |
| 139 | N1 | PZ  | 0.00000  | -0.05387 | 0.00000  | 0.00000  | 0.00262  |
| 140 | N1 | DXX | -0.04190 | 0.00000  | 0.00918  | -0.03036 | 0.00000  |
| 141 | N1 | DYY | 0.02296  | 0.00000  | -0.02264 | 0.03528  | 0.00000  |
| 142 | N1 | DZZ | 0.00879  | 0.00000  | 0.01982  | -0.03166 | 0.00000  |
| 143 | N1 | DXY | 0.01165  | 0.00000  | 0.00641  | 0.00030  | 0.00000  |
| 144 | N1 | DXZ | 0.00000  | 0.01634  | 0.00000  | 0.00000  | 0.01984  |
| 145 | N1 | DYZ | 0.00000  | 0.01159  | 0.00000  | 0.00000  | 0.01629  |
| 146 | H6 | S   | 0.06823  | 0.00000  | 0.05642  | -0.00999 | 0.00000  |
| 147 | H6 | S   | 0.21149  | 0.00000  | 0.35246  | 0.39355  | 0.00000  |
| 148 | H6 | PX  | -0.00771 | 0.00000  | -0.00156 | 0.00657  | 0.00000  |
| 149 | H6 | PY  | -0.00392 | 0.00000  | 0.00327  | 0.00160  | 0.00000  |
| 150 | H6 | PZ  | 0.00000  | 0.00017  | 0.00000  | 0.00000  | 0.00312  |
| 151 | C8 | S   | -0.02972 | 0.00000  | 0.03303  | -0.04821 | 0.00000  |
| 152 | C8 | S   | -0.53701 | 0.00000  | 0.17198  | 0.26498  | 0.00000  |
| 153 | C8 | PX  | 0.16477  | 0.00000  | -0.02077 | 0.32616  | 0.00000  |
| 154 | C8 | PY  | 0.00445  | 0.00000  | -0.06717 | 0.17482  | 0.00000  |
| 155 | C8 | PZ  | 0.00000  | 0.16225  | 0.00000  | 0.00000  | 0.19660  |
| 156 | C8 | S   | 0.94269  | 0.00000  | -0.25310 | 0.15199  | 0.00000  |
| 157 | C8 | PX  | 0.34532  | 0.00000  | -0.08399 | 0.17230  | 0.00000  |



|     |     |     |          |          |          |          |          |
|-----|-----|-----|----------|----------|----------|----------|----------|
| 158 | C8  | PY  | -0.74691 | 0.00000  | 0.69385  | 0.04875  | 0.00000  |
| 159 | C8  | PZ  | 0.00000  | -0.22681 | 0.00000  | 0.00000  | -0.24304 |
| 160 | C8  | DXX | -0.04784 | 0.00000  | 0.02403  | 0.03091  | 0.00000  |
| 161 | C8  | DYY | -0.10876 | 0.00000  | 0.06038  | -0.02279 | 0.00000  |
| 162 | C8  | DZZ | 0.01333  | 0.00000  | -0.01894 | 0.02440  | 0.00000  |
| 163 | C8  | DXY | -0.00756 | 0.00000  | -0.00644 | 0.02540  | 0.00000  |
| 164 | C8  | DXZ | 0.00000  | -0.01152 | 0.00000  | 0.00000  | -0.00740 |
| 165 | C8  | DYZ | 0.00000  | -0.04423 | 0.00000  | 0.00000  | 0.03261  |
| 166 | H8  | S   | -0.21038 | 0.00000  | 0.09179  | 0.26167  | 0.00000  |
| 167 | H8  | S   | 0.33755  | 0.00000  | -0.26704 | -0.14738 | 0.00000  |
| 168 | H8  | PX  | -0.01975 | 0.00000  | 0.00440  | 0.02166  | 0.00000  |
| 169 | H8  | PY  | 0.02075  | 0.00000  | -0.00997 | -0.00232 | 0.00000  |
| 170 | H8  | PZ  | 0.00000  | 0.00015  | 0.00000  | 0.00000  | 0.00374  |
| 171 | C10 | S   | -0.00619 | 0.00000  | 0.00100  | 0.02000  | 0.00000  |
| 172 | C10 | S   | -0.42047 | 0.00000  | 0.31220  | -0.09482 | 0.00000  |
| 173 | C10 | PX  | 0.07998  | 0.00000  | -0.04695 | 0.24388  | 0.00000  |
| 174 | C10 | PY  | -0.22428 | 0.00000  | 0.20974  | -0.21459 | 0.00000  |
| 175 | C10 | PZ  | 0.00000  | 0.47762  | 0.00000  | 0.00000  | -0.48884 |
| 176 | C10 | S   | -0.07050 | 0.00000  | 0.05089  | -0.04912 | 0.00000  |
| 177 | C10 | PX  | -0.16073 | 0.00000  | -0.02351 | -0.75725 | 0.00000  |
| 178 | C10 | PY  | -0.33241 | 0.00000  | 0.09056  | 0.10536  | 0.00000  |
| 179 | C10 | PZ  | 0.00000  | -0.44474 | 0.00000  | 0.00000  | 0.55813  |
| 180 | C10 | DXX | -0.08093 | 0.00000  | 0.05101  | 0.01308  | 0.00000  |
| 181 | C10 | DYY | -0.03804 | 0.00000  | 0.02949  | 0.00741  | 0.00000  |
| 182 | C10 | DZZ | 0.00863  | 0.00000  | -0.00089 | -0.02073 | 0.00000  |
| 183 | C10 | DXY | 0.00554  | 0.00000  | 0.00192  | -0.02203 | 0.00000  |
| 184 | C10 | DXZ | 0.00000  | 0.00189  | 0.00000  | 0.00000  | -0.00215 |
| 185 | C10 | DYZ | 0.00000  | 0.02291  | 0.00000  | 0.00000  | 0.00048  |
| 186 | H16 | S   | -0.14138 | 0.00000  | 0.07748  | 0.21110  | 0.00000  |
| 187 | H16 | S   | 0.04524  | 0.00000  | 0.05448  | 0.30130  | 0.00000  |
| 188 | H16 | PX  | -0.02136 | 0.00000  | 0.01201  | -0.01609 | 0.00000  |
| 189 | H16 | PY  | 0.00307  | 0.00000  | -0.00183 | -0.01452 | 0.00000  |
| 190 | H16 | PZ  | 0.00000  | 0.00802  | 0.00000  | 0.00000  | -0.00808 |
| 191 | H18 | S   | -0.13001 | 0.00000  | 0.06995  | -0.07815 | 0.00000  |
| 192 | H18 | S   | -0.29837 | 0.00000  | 0.07772  | -0.27716 | 0.00000  |
| 193 | H18 | PX  | 0.00794  | 0.00000  | -0.00868 | -0.01278 | 0.00000  |
| 194 | H18 | PY  | 0.01142  | 0.00000  | -0.00638 | 0.00370  | 0.00000  |
| 195 | H18 | PZ  | 0.00000  | 0.00459  | 0.00000  | 0.00000  | -0.00745 |
| 196 | C9  | S   | 0.01318  | 0.00000  | 0.02188  | -0.00078 | 0.00000  |
| 197 | C9  | S   | -0.16643 | 0.00000  | -0.17775 | 0.00659  | 0.00000  |
| 198 | C9  | PX  | 0.37650  | 0.00000  | 0.37873  | 0.02036  | 0.00000  |
| 199 | C9  | PY  | 0.08221  | 0.00000  | 0.18471  | -0.03736 | 0.00000  |
| 200 | C9  | PZ  | 0.00000  | 0.16172  | 0.00000  | 0.00000  | 0.19759  |
| 201 | C9  | S   | 0.20466  | 0.00000  | 0.21412  | -0.04040 | 0.00000  |
| 202 | C9  | PX  | -0.44843 | 0.00000  | -0.53530 | -0.00958 | 0.00000  |
| 203 | C9  | PY  | 0.02303  | 0.00000  | -0.18449 | 0.13576  | 0.00000  |
| 204 | C9  | PZ  | 0.00000  | -0.23287 | 0.00000  | 0.00000  | -0.35931 |
| 205 | C9  | DXX | 0.03182  | 0.00000  | 0.03011  | -0.01955 | 0.00000  |
| 206 | C9  | DYY | -0.02583 | 0.00000  | 0.00970  | 0.02208  | 0.00000  |
| 207 | C9  | DZZ | -0.01142 | 0.00000  | -0.02658 | -0.00268 | 0.00000  |
| 208 | C9  | DXY | 0.03203  | 0.00000  | 0.04092  | 0.02738  | 0.00000  |
| 209 | C9  | DXZ | 0.00000  | -0.00913 | 0.00000  | 0.00000  | 0.00036  |
| 210 | C9  | DYZ | 0.00000  | -0.01194 | 0.00000  | 0.00000  | -0.02089 |
| 211 | H3  | S   | -0.07516 | 0.00000  | 0.06196  | 0.03393  | 0.00000  |

|     |    |    |          |          |          |          |          |
|-----|----|----|----------|----------|----------|----------|----------|
| 212 | H3 | S  | -0.03451 | 0.00000  | -0.05247 | -0.12164 | 0.00000  |
| 213 | H3 | PX | 0.01072  | 0.00000  | 0.01877  | 0.00924  | 0.00000  |
| 214 | H3 | PY | 0.00188  | 0.00000  | 0.00526  | 0.00823  | 0.00000  |
| 215 | H3 | PZ | 0.00000  | -0.00242 | 0.00000  | 0.00000  | -0.00863 |
| 216 | H5 | S  | 0.04797  | -0.01364 | 0.01401  | -0.03885 | -0.04682 |
| 217 | H5 | S  | 0.00210  | -0.01284 | 0.07023  | 0.06829  | -0.03726 |
| 218 | H5 | PX | 0.00286  | 0.01153  | 0.00400  | -0.00730 | 0.01377  |
| 219 | H5 | PY | 0.01145  | 0.00574  | 0.00542  | 0.00322  | 0.00876  |
| 220 | H5 | PZ | 0.00877  | -0.01142 | 0.00855  | 0.00201  | -0.01339 |
| 221 | H7 | S  | 0.04797  | 0.01364  | 0.01401  | -0.03885 | 0.04682  |
| 222 | H7 | S  | 0.00210  | 0.01284  | 0.07023  | 0.06829  | 0.03726  |
| 223 | H7 | PX | 0.00286  | -0.01153 | 0.00400  | -0.00730 | -0.01377 |
| 224 | H7 | PY | 0.01145  | -0.00574 | 0.00542  | 0.00322  | -0.00876 |
| 225 | H7 | PZ | -0.00877 | -0.01142 | -0.00855 | -0.00201 | -0.01339 |

|              |          |          |          |          |          |
|--------------|----------|----------|----------|----------|----------|
| MO:          | 81       | 82       | 83       | 84       | 85       |
| Eigenvalues: | 0.85238  | 0.87614  | 0.87640  | 0.89436  | 0.91131  |
| (ev):        | 23.19457 | 23.84103 | 23.84796 | 24.33683 | 24.79810 |

|    |    | A   | A        | A        | A        | A        |          |
|----|----|-----|----------|----------|----------|----------|----------|
| 1  | H1 | S   | 0.09784  | 0.00000  | -0.23481 | 0.00000  | 0.18368  |
| 2  | H1 | S   | 0.08025  | 0.00000  | 0.11908  | 0.00000  | 0.10641  |
| 3  | H1 | PX  | 0.00870  | 0.00000  | -0.01304 | 0.00000  | 0.00979  |
| 4  | H1 | PY  | 0.01464  | 0.00000  | -0.00181 | 0.00000  | 0.00124  |
| 5  | H1 | PZ  | 0.00000  | 0.00007  | 0.00000  | -0.00276 | 0.00000  |
| 6  | C1 | S   | 0.01561  | 0.00000  | -0.06156 | 0.00000  | 0.02476  |
| 7  | C1 | S   | 0.22409  | 0.00000  | -0.06639 | 0.00000  | 0.16070  |
| 8  | C1 | PX  | -0.13001 | 0.00000  | -0.14963 | 0.00000  | 0.07363  |
| 9  | C1 | PY  | 0.23045  | 0.00000  | -0.00669 | 0.00000  | -0.09446 |
| 10 | C1 | PZ  | 0.00000  | -0.10311 | 0.00000  | 0.47764  | 0.00000  |
| 11 | C1 | S   | 0.43231  | 0.00000  | 0.66852  | 0.00000  | -0.21869 |
| 12 | C1 | PX  | -0.61504 | 0.00000  | -0.16032 | 0.00000  | -0.40983 |
| 13 | C1 | PY  | 0.98470  | 0.00000  | 0.12024  | 0.00000  | 0.51449  |
| 14 | C1 | PZ  | 0.00000  | -0.02551 | 0.00000  | -0.69219 | 0.00000  |
| 15 | C1 | DXX | 0.06674  | 0.00000  | -0.08132 | 0.00000  | 0.06294  |
| 16 | C1 | DYY | 0.03590  | 0.00000  | -0.05118 | 0.00000  | 0.03670  |
| 17 | C1 | DZZ | -0.02139 | 0.00000  | 0.04968  | 0.00000  | -0.01946 |
| 18 | C1 | DXY | 0.00259  | 0.00000  | 0.01293  | 0.00000  | -0.00017 |
| 19 | C1 | DXZ | 0.00000  | 0.01191  | 0.00000  | -0.01370 | 0.00000  |
| 20 | C1 | DYZ | 0.00000  | 0.00720  | 0.00000  | -0.00937 | 0.00000  |
| 21 | C2 | S   | -0.03424 | 0.00000  | -0.04866 | 0.00000  | 0.02237  |
| 22 | C2 | S   | -0.11525 | 0.00000  | -0.18517 | 0.00000  | 0.21413  |
| 23 | C2 | PX  | 0.06323  | 0.00000  | 0.01389  | 0.00000  | 0.08727  |
| 24 | C2 | PY  | 0.05394  | 0.00000  | 0.20276  | 0.00000  | -0.25221 |
| 25 | C2 | PZ  | 0.00000  | 0.23750  | 0.00000  | 0.60821  | 0.00000  |
| 26 | C2 | S   | -0.36495 | 0.00000  | 0.74084  | 0.00000  | -0.88094 |
| 27 | C2 | PX  | 0.10714  | 0.00000  | 0.30583  | 0.00000  | -0.17778 |
| 28 | C2 | PY  | -1.74042 | 0.00000  | -0.25637 | 0.00000  | 0.03092  |
| 29 | C2 | PZ  | 0.00000  | -0.33700 | 0.00000  | -0.89955 | 0.00000  |
| 30 | C2 | DXX | -0.06255 | 0.00000  | -0.05028 | 0.00000  | 0.03773  |
| 31 | C2 | DYY | -0.04614 | 0.00000  | -0.08882 | 0.00000  | 0.05088  |
| 32 | C2 | DZZ | 0.02972  | 0.00000  | 0.03540  | 0.00000  | -0.00785 |
| 33 | C2 | DXY | -0.02834 | 0.00000  | 0.01260  | 0.00000  | 0.01848  |
| 34 | C2 | DXZ | 0.00000  | 0.03018  | 0.00000  | 0.00901  | 0.00000  |

|    |    |     |          |          |          |          |          |
|----|----|-----|----------|----------|----------|----------|----------|
| 35 | C2 | DYZ | 0.00000  | 0.03606  | 0.00000  | -0.01199 | 0.00000  |
| 36 | C3 | S   | 0.01964  | 0.00000  | 0.03054  | 0.00000  | 0.00526  |
| 37 | C3 | S   | 0.10749  | 0.00000  | 0.00850  | 0.00000  | -0.13551 |
| 38 | C3 | PX  | 0.05601  | 0.00000  | -0.05994 | 0.00000  | 0.00775  |
| 39 | C3 | PY  | 0.24774  | 0.00000  | -0.27177 | 0.00000  | 0.20699  |
| 40 | C3 | PZ  | 0.00000  | -0.10660 | 0.00000  | -0.11645 | 0.00000  |
| 41 | C3 | S   | -1.34345 | 0.00000  | -0.09195 | 0.00000  | -0.41714 |
| 42 | C3 | PX  | 0.80748  | 0.00000  | 0.31858  | 0.00000  | 0.26676  |
| 43 | C3 | PY  | 1.42970  | 0.00000  | -0.11758 | 0.00000  | 0.55602  |
| 44 | C3 | PZ  | 0.00000  | 0.09814  | 0.00000  | 0.21658  | 0.00000  |
| 45 | C3 | DXX | 0.07716  | 0.00000  | 0.03420  | 0.00000  | -0.03557 |
| 46 | C3 | DYY | -0.02359 | 0.00000  | 0.01215  | 0.00000  | -0.01130 |
| 47 | C3 | DZZ | -0.01561 | 0.00000  | -0.02342 | 0.00000  | 0.01180  |
| 48 | C3 | DXY | 0.00103  | 0.00000  | 0.00237  | 0.00000  | 0.00498  |
| 49 | C3 | DXZ | 0.00000  | 0.01682  | 0.00000  | -0.01210 | 0.00000  |
| 50 | C3 | DYZ | 0.00000  | -0.04407 | 0.00000  | 0.02090  | 0.00000  |
| 51 | C4 | S   | 0.02413  | 0.00000  | 0.02051  | 0.00000  | -0.01158 |
| 52 | C4 | S   | -0.15859 | 0.00000  | 0.07739  | 0.00000  | -0.01085 |
| 53 | C4 | PX  | -0.05495 | 0.00000  | -0.20238 | 0.00000  | 0.12753  |
| 54 | C4 | PY  | -0.44171 | 0.00000  | 0.36953  | 0.00000  | -0.09656 |
| 55 | C4 | PZ  | 0.00000  | -0.39994 | 0.00000  | -0.26554 | 0.00000  |
| 56 | C4 | S   | 0.01235  | 0.00000  | -0.34414 | 0.00000  | -0.08849 |
| 57 | C4 | PX  | -1.69996 | 0.00000  | -0.25646 | 0.00000  | -0.55625 |
| 58 | C4 | PY  | 1.57922  | 0.00000  | -0.55078 | 0.00000  | 0.57315  |
| 59 | C4 | PZ  | 0.00000  | 0.67617  | 0.00000  | 0.34279  | 0.00000  |
| 60 | C4 | DXX | -0.00865 | 0.00000  | 0.06538  | 0.00000  | -0.04269 |
| 61 | C4 | DYY | 0.04377  | 0.00000  | -0.02465 | 0.00000  | 0.02143  |
| 62 | C4 | DZZ | -0.02732 | 0.00000  | -0.00763 | 0.00000  | 0.01071  |
| 63 | C4 | DXY | -0.01661 | 0.00000  | -0.03058 | 0.00000  | 0.02222  |
| 64 | C4 | DXZ | 0.00000  | -0.01784 | 0.00000  | 0.03734  | 0.00000  |
| 65 | C4 | DYZ | 0.00000  | -0.01236 | 0.00000  | -0.01208 | 0.00000  |
| 66 | C5 | S   | 0.00043  | 0.00000  | 0.03335  | 0.00000  | -0.01857 |
| 67 | C5 | S   | -0.22116 | 0.00000  | -0.00719 | 0.00000  | 0.01489  |
| 68 | C5 | PX  | -0.03823 | 0.00000  | 0.17434  | 0.00000  | -0.09375 |
| 69 | C5 | PY  | 0.07424  | 0.00000  | 0.18762  | 0.00000  | -0.11255 |
| 70 | C5 | PZ  | 0.00000  | 0.46553  | 0.00000  | -0.50393 | 0.00000  |
| 71 | C5 | S   | 0.80954  | 0.00000  | -0.50311 | 0.00000  | 0.17208  |
| 72 | C5 | PX  | -0.95662 | 0.00000  | -0.52267 | 0.00000  | -0.01635 |
| 73 | C5 | PY  | -1.53713 | 0.00000  | 0.10884  | 0.00000  | -0.42465 |
| 74 | C5 | PZ  | 0.00000  | -0.65053 | 0.00000  | 0.70076  | 0.00000  |
| 75 | C5 | DXX | -0.03980 | 0.00000  | -0.01059 | 0.00000  | -0.00305 |
| 76 | C5 | DYY | -0.01855 | 0.00000  | 0.06933  | 0.00000  | -0.03776 |
| 77 | C5 | DZZ | 0.00464  | 0.00000  | -0.01489 | 0.00000  | 0.01454  |
| 78 | C5 | DXY | 0.05185  | 0.00000  | 0.02387  | 0.00000  | -0.03634 |
| 79 | C5 | DXZ | 0.00000  | 0.01951  | 0.00000  | -0.02823 | 0.00000  |
| 80 | C5 | DYZ | 0.00000  | -0.04022 | 0.00000  | -0.02646 | 0.00000  |
| 81 | C6 | S   | 0.01053  | 0.00000  | -0.00790 | 0.00000  | -0.00063 |
| 82 | C6 | S   | 0.13540  | 0.00000  | 0.06339  | 0.00000  | -0.00196 |
| 83 | C6 | PX  | 0.43682  | 0.00000  | 0.30853  | 0.00000  | -0.05325 |
| 84 | C6 | PY  | 0.15271  | 0.00000  | -0.20912 | 0.00000  | -0.04044 |
| 85 | C6 | PZ  | 0.00000  | -0.48219 | 0.00000  | -0.09535 | 0.00000  |
| 86 | C6 | S   | -0.70020 | 0.00000  | -0.25069 | 0.00000  | 0.56499  |
| 87 | C6 | PX  | 1.23486  | 0.00000  | -0.09528 | 0.00000  | 0.25634  |
| 88 | C6 | PY  | 0.34160  | 0.00000  | 0.16275  | 0.00000  | 0.07300  |

|     |    |     |          |          |          |          |          |
|-----|----|-----|----------|----------|----------|----------|----------|
| 89  | C6 | PZ  | 0.00000  | 0.71731  | 0.00000  | 0.25094  | 0.00000  |
| 90  | C6 | DXX | -0.00502 | 0.00000  | 0.00448  | 0.00000  | 0.00576  |
| 91  | C6 | DYY | 0.03737  | 0.00000  | -0.01294 | 0.00000  | -0.01980 |
| 92  | C6 | DZZ | -0.00286 | 0.00000  | 0.00556  | 0.00000  | 0.00661  |
| 93  | C6 | DXY | 0.00041  | 0.00000  | 0.03309  | 0.00000  | -0.02660 |
| 94  | C6 | DXZ | 0.00000  | -0.01070 | 0.00000  | -0.00117 | 0.00000  |
| 95  | C6 | DYZ | 0.00000  | 0.02370  | 0.00000  | 0.00975  | 0.00000  |
| 96  | C7 | S   | -0.06178 | 0.00000  | 0.00764  | 0.00000  | -0.03640 |
| 97  | C7 | S   | -0.02343 | 0.00000  | 0.18641  | 0.00000  | -0.36076 |
| 98  | C7 | PX  | -0.04706 | 0.00000  | -0.04896 | 0.00000  | 0.19145  |
| 99  | C7 | PY  | -0.13242 | 0.00000  | 0.02304  | 0.00000  | 0.13235  |
| 100 | C7 | PZ  | 0.00000  | 0.60355  | 0.00000  | -0.15546 | 0.00000  |
| 101 | C7 | S   | 1.82572  | 0.00000  | -0.48436 | 0.00000  | 1.04408  |
| 102 | C7 | PX  | -1.49090 | 0.00000  | 0.08057  | 0.00000  | -0.95128 |
| 103 | C7 | PY  | -0.03240 | 0.00000  | -0.08161 | 0.00000  | -0.04938 |
| 104 | C7 | PZ  | 0.00000  | -0.85059 | 0.00000  | -0.00833 | 0.00000  |
| 105 | C7 | DXX | -0.08790 | 0.00000  | -0.00842 | 0.00000  | -0.09595 |
| 106 | C7 | DYY | 0.01833  | 0.00000  | 0.05876  | 0.00000  | -0.05765 |
| 107 | C7 | DZZ | 0.03232  | 0.00000  | -0.00773 | 0.00000  | 0.03787  |
| 108 | C7 | DXY | 0.01353  | 0.00000  | 0.00184  | 0.00000  | 0.00132  |
| 109 | C7 | DXZ | 0.00000  | -0.03506 | 0.00000  | 0.00570  | 0.00000  |
| 110 | C7 | DYZ | 0.00000  | -0.00181 | 0.00000  | -0.00027 | 0.00000  |
| 111 | O1 | S   | -0.00717 | 0.00000  | -0.00169 | 0.00000  | 0.00676  |
| 112 | O1 | S   | 0.09103  | 0.00000  | 0.08217  | 0.00000  | -0.05542 |
| 113 | O1 | PX  | 0.16988  | 0.00000  | 0.06838  | 0.00000  | -0.02046 |
| 114 | O1 | PY  | -0.12904 | 0.00000  | 0.10628  | 0.00000  | -0.04851 |
| 115 | O1 | PZ  | 0.00000  | 0.01604  | 0.00000  | -0.05199 | 0.00000  |
| 116 | O1 | S   | -0.78626 | 0.00000  | 0.05441  | 0.00000  | -0.14466 |
| 117 | O1 | PX  | 0.15651  | 0.00000  | -0.04200 | 0.00000  | 0.11565  |
| 118 | O1 | PY  | 0.11852  | 0.00000  | -0.09659 | 0.00000  | 0.14831  |
| 119 | O1 | PZ  | 0.00000  | -0.06869 | 0.00000  | -0.00518 | 0.00000  |
| 120 | O1 | DXX | 0.01259  | 0.00000  | -0.01748 | 0.00000  | -0.00636 |
| 121 | O1 | DYY | -0.09578 | 0.00000  | 0.10010  | 0.00000  | -0.04003 |
| 122 | O1 | DZZ | 0.06589  | 0.00000  | 0.00535  | 0.00000  | -0.00060 |
| 123 | O1 | DXY | -0.02507 | 0.00000  | 0.00564  | 0.00000  | -0.00553 |
| 124 | O1 | DXZ | 0.00000  | 0.01944  | 0.00000  | -0.03078 | 0.00000  |
| 125 | O1 | DYZ | 0.00000  | 0.02337  | 0.00000  | 0.00992  | 0.00000  |
| 126 | H4 | S   | -0.21659 | 0.00000  | 0.07321  | 0.00000  | -0.00380 |
| 127 | H4 | S   | 0.17630  | 0.00000  | -0.13389 | 0.00000  | 0.04255  |
| 128 | H4 | PX  | 0.02334  | 0.00000  | -0.00536 | 0.00000  | -0.00168 |
| 129 | H4 | PY  | -0.00680 | 0.00000  | 0.00999  | 0.00000  | -0.00630 |
| 130 | H4 | PZ  | 0.00000  | -0.00780 | 0.00000  | -0.00252 | 0.00000  |
| 131 | N1 | S   | -0.01260 | 0.00000  | 0.01581  | 0.00000  | 0.00699  |
| 132 | N1 | S   | 0.02038  | 0.00000  | -0.06815 | 0.00000  | 0.00989  |
| 133 | N1 | PX  | 0.11042  | 0.00000  | -0.05303 | 0.00000  | -0.17831 |
| 134 | N1 | PY  | 0.10199  | 0.00000  | 0.04603  | 0.00000  | -0.06151 |
| 135 | N1 | PZ  | 0.00000  | -0.15115 | 0.00000  | 0.06565  | 0.00000  |
| 136 | N1 | S   | 0.55006  | 0.00000  | 0.40273  | 0.00000  | -0.32647 |
| 137 | N1 | PX  | -0.37202 | 0.00000  | 0.18751  | 0.00000  | -0.04333 |
| 138 | N1 | PY  | 0.58911  | 0.00000  | -0.04819 | 0.00000  | -0.01638 |
| 139 | N1 | PZ  | 0.00000  | -0.06299 | 0.00000  | -0.22620 | 0.00000  |
| 140 | N1 | DXX | 0.02146  | 0.00000  | 0.00995  | 0.00000  | -0.01106 |
| 141 | N1 | DYY | -0.02181 | 0.00000  | 0.03966  | 0.00000  | 0.01327  |
| 142 | N1 | DZZ | -0.01889 | 0.00000  | -0.04135 | 0.00000  | 0.02923  |

|     |     |     |          |          |          |          |          |
|-----|-----|-----|----------|----------|----------|----------|----------|
| 143 | N1  | DXY | 0.00811  | 0.00000  | -0.04159 | 0.00000  | 0.00867  |
| 144 | N1  | DXZ | 0.00000  | -0.02133 | 0.00000  | -0.00054 | 0.00000  |
| 145 | N1  | DYZ | 0.00000  | -0.03640 | 0.00000  | 0.00054  | 0.00000  |
| 146 | H6  | S   | -0.24512 | 0.00000  | -0.16397 | 0.00000  | 0.14713  |
| 147 | H6  | S   | -0.11608 | 0.00000  | 0.02561  | 0.00000  | 0.01340  |
| 148 | H6  | PX  | 0.01858  | 0.00000  | 0.00783  | 0.00000  | -0.00672 |
| 149 | H6  | PY  | 0.00091  | 0.00000  | 0.00411  | 0.00000  | -0.00853 |
| 150 | H6  | PZ  | 0.00000  | -0.00967 | 0.00000  | 0.00170  | 0.00000  |
| 151 | C8  | S   | 0.02882  | 0.00000  | -0.04853 | 0.00000  | -0.04591 |
| 152 | C8  | S   | 0.00749  | 0.00000  | 0.43293  | 0.00000  | 0.09510  |
| 153 | C8  | PX  | -0.20835 | 0.00000  | -0.08793 | 0.00000  | 0.02292  |
| 154 | C8  | PY  | -0.03254 | 0.00000  | -0.11832 | 0.00000  | -0.46663 |
| 155 | C8  | PZ  | 0.00000  | -0.27001 | 0.00000  | -0.44768 | 0.00000  |
| 156 | C8  | S   | -0.55725 | 0.00000  | -0.20012 | 0.00000  | -0.06071 |
| 157 | C8  | PX  | -0.54332 | 0.00000  | 0.39702  | 0.00000  | -0.34087 |
| 158 | C8  | PY  | -1.02123 | 0.00000  | -0.33149 | 0.00000  | 0.05370  |
| 159 | C8  | PZ  | 0.00000  | 0.48300  | 0.00000  | 0.66663  | 0.00000  |
| 160 | C8  | DXX | 0.02431  | 0.00000  | 0.05669  | 0.00000  | -0.01864 |
| 161 | C8  | DYY | 0.01403  | 0.00000  | -0.04488 | 0.00000  | -0.09506 |
| 162 | C8  | DZZ | -0.01649 | 0.00000  | 0.02926  | 0.00000  | 0.04281  |
| 163 | C8  | DXY | 0.00963  | 0.00000  | 0.06314  | 0.00000  | 0.01108  |
| 164 | C8  | DXZ | 0.00000  | 0.01257  | 0.00000  | -0.00449 | 0.00000  |
| 165 | C8  | DYZ | 0.00000  | 0.03293  | 0.00000  | -0.01304 | 0.00000  |
| 166 | H8  | S   | -0.29557 | 0.00000  | -0.10073 | 0.00000  | -0.11294 |
| 167 | H8  | S   | 0.85416  | 0.00000  | 0.12151  | 0.00000  | 0.48349  |
| 168 | H8  | PX  | -0.02851 | 0.00000  | -0.00394 | 0.00000  | -0.02843 |
| 169 | H8  | PY  | -0.00299 | 0.00000  | 0.00201  | 0.00000  | 0.01026  |
| 170 | H8  | PZ  | 0.00000  | -0.00648 | 0.00000  | -0.00451 | 0.00000  |
| 171 | C10 | S   | -0.00860 | 0.00000  | 0.05513  | 0.00000  | 0.07885  |
| 172 | C10 | S   | 0.07080  | 0.00000  | 0.11322  | 0.00000  | 0.45964  |
| 173 | C10 | PX  | -0.07025 | 0.00000  | 0.11399  | 0.00000  | -0.02502 |
| 174 | C10 | PY  | 0.01753  | 0.00000  | -0.39407 | 0.00000  | -0.29143 |
| 175 | C10 | PZ  | 0.00000  | -0.01667 | 0.00000  | 0.33851  | 0.00000  |
| 176 | C10 | S   | -0.53161 | 0.00000  | -0.92507 | 0.00000  | -1.40023 |
| 177 | C10 | PX  | 0.52250  | 0.00000  | -0.20005 | 0.00000  | 0.31852  |
| 178 | C10 | PY  | -0.09412 | 0.00000  | 0.25380  | 0.00000  | 0.33500  |
| 179 | C10 | PZ  | 0.00000  | -0.06091 | 0.00000  | -0.51099 | 0.00000  |
| 180 | C10 | DXX | 0.01349  | 0.00000  | 0.07318  | 0.00000  | 0.11999  |
| 181 | C10 | DYY | -0.02294 | 0.00000  | 0.07700  | 0.00000  | 0.16867  |
| 182 | C10 | DZZ | 0.00682  | 0.00000  | -0.05733 | 0.00000  | -0.07052 |
| 183 | C10 | DXY | -0.03341 | 0.00000  | -0.03045 | 0.00000  | -0.00694 |
| 184 | C10 | DXZ | 0.00000  | -0.00664 | 0.00000  | 0.00720  | 0.00000  |
| 185 | C10 | DYZ | 0.00000  | -0.02679 | 0.00000  | -0.01586 | 0.00000  |
| 186 | H16 | S   | 0.03736  | 0.00000  | 0.29469  | 0.00000  | 0.36124  |
| 187 | H16 | S   | -0.31175 | 0.00000  | 0.05732  | 0.00000  | -0.01681 |
| 188 | H16 | PX  | 0.00651  | 0.00000  | 0.00361  | 0.00000  | 0.02126  |
| 189 | H16 | PY  | -0.00413 | 0.00000  | -0.00812 | 0.00000  | -0.01239 |
| 190 | H16 | PZ  | 0.00000  | -0.00059 | 0.00000  | 0.00549  | 0.00000  |
| 191 | H18 | S   | -0.06046 | 0.00000  | 0.19439  | 0.00000  | 0.43865  |
| 192 | H18 | S   | 0.33605  | 0.00000  | 0.09860  | 0.00000  | 0.31388  |
| 193 | H18 | PX  | 0.00753  | 0.00000  | 0.00132  | 0.00000  | -0.00204 |
| 194 | H18 | PY  | 0.01369  | 0.00000  | -0.00916 | 0.00000  | -0.01708 |
| 195 | H18 | PZ  | 0.00000  | 0.00601  | 0.00000  | 0.00421  | 0.00000  |
| 196 | C9  | S   | 0.00492  | 0.00000  | 0.01228  | 0.00000  | -0.00963 |

|     |    |     |          |          |          |          |          |
|-----|----|-----|----------|----------|----------|----------|----------|
| 197 | C9 | S   | -0.09949 | 0.00000  | -0.02118 | 0.00000  | -0.01051 |
| 198 | C9 | PX  | 0.22409  | 0.00000  | 0.15919  | 0.00000  | -0.03529 |
| 199 | C9 | PY  | -0.01130 | 0.00000  | 0.13336  | 0.00000  | -0.06838 |
| 200 | C9 | PZ  | 0.00000  | 0.14791  | 0.00000  | -0.08375 | 0.00000  |
| 201 | C9 | S   | 0.10245  | 0.00000  | -0.03912 | 0.00000  | 0.05151  |
| 202 | C9 | PX  | -0.27470 | 0.00000  | -0.22414 | 0.00000  | 0.09281  |
| 203 | C9 | PY  | 0.21273  | 0.00000  | -0.30930 | 0.00000  | 0.18107  |
| 204 | C9 | PZ  | 0.00000  | -0.29104 | 0.00000  | 0.05261  | 0.00000  |
| 205 | C9 | DXX | -0.00263 | 0.00000  | 0.04381  | 0.00000  | -0.01621 |
| 206 | C9 | DYY | 0.00222  | 0.00000  | -0.01622 | 0.00000  | -0.01238 |
| 207 | C9 | DZZ | -0.00663 | 0.00000  | -0.00647 | 0.00000  | 0.00646  |
| 208 | C9 | DXY | 0.05010  | 0.00000  | -0.00966 | 0.00000  | 0.00022  |
| 209 | C9 | DXZ | 0.00000  | -0.00775 | 0.00000  | 0.02976  | 0.00000  |
| 210 | C9 | DYZ | 0.00000  | -0.02486 | 0.00000  | -0.00303 | 0.00000  |
| 211 | H3 | S   | -0.02165 | 0.00000  | 0.00156  | 0.00000  | -0.06189 |
| 212 | H3 | S   | -0.17468 | 0.00000  | 0.20443  | 0.00000  | -0.07219 |
| 213 | H3 | PX  | 0.01547  | 0.00000  | -0.00217 | 0.00000  | -0.00244 |
| 214 | H3 | PY  | 0.01011  | 0.00000  | -0.00809 | 0.00000  | -0.00044 |
| 215 | H3 | PZ  | 0.00000  | -0.01020 | 0.00000  | -0.00603 | 0.00000  |
| 216 | H5 | S   | -0.01015 | -0.03438 | 0.05344  | -0.06594 | -0.01105 |
| 217 | H5 | S   | 0.06683  | -0.05369 | -0.02044 | 0.04675  | -0.02836 |
| 218 | H5 | PX  | -0.00534 | 0.01039  | 0.01084  | -0.01001 | -0.00413 |
| 219 | H5 | PY  | 0.00989  | 0.00781  | -0.00110 | -0.00142 | 0.00333  |
| 220 | H5 | PZ  | 0.00605  | -0.01059 | 0.00420  | 0.00844  | -0.00014 |
| 221 | H7 | S   | -0.01015 | 0.03438  | 0.05344  | 0.06594  | -0.01105 |
| 222 | H7 | S   | 0.06683  | 0.05369  | -0.02044 | -0.04675 | -0.02836 |
| 223 | H7 | PX  | -0.00534 | -0.01039 | 0.01084  | 0.01001  | -0.00413 |
| 224 | H7 | PY  | 0.00989  | -0.00781 | -0.00110 | 0.00142  | 0.00333  |
| 225 | H7 | PZ  | -0.00605 | -0.01059 | -0.00420 | 0.00844  | 0.00014  |

|              |          |          |          |          |          |
|--------------|----------|----------|----------|----------|----------|
| MO:          | 86       | 87       | 88       | 89       | 90       |
| Eigenvalues: | 0.92840  | 0.96524  | 0.97925  | 0.98288  | 0.99443  |
| (ev):        | 25.26314 | 26.26542 | 26.64664 | 26.74547 | 27.05974 |

|    |    | A   | A        | A        | A        | A        |          |
|----|----|-----|----------|----------|----------|----------|----------|
| 1  | H1 | S   | -0.22739 | 0.00000  | -0.08795 | 0.00000  | 0.01319  |
| 2  | H1 | S   | 0.66028  | 0.00000  | 0.28861  | 0.00000  | 0.27057  |
| 3  | H1 | PX  | -0.01928 | 0.00000  | 0.00135  | 0.00000  | 0.00319  |
| 4  | H1 | PY  | 0.00009  | 0.00000  | -0.01430 | 0.00000  | 0.01922  |
| 5  | H1 | PZ  | 0.00000  | -0.00060 | 0.00000  | -0.02139 | 0.00000  |
| 6  | C1 | S   | -0.06019 | 0.00000  | -0.00180 | 0.00000  | -0.00057 |
| 7  | C1 | S   | -0.07939 | 0.00000  | -0.10237 | 0.00000  | -0.05336 |
| 8  | C1 | PX  | -0.25856 | 0.00000  | 0.00946  | 0.00000  | -0.05233 |
| 9  | C1 | PY  | 0.32233  | 0.00000  | -0.11620 | 0.00000  | -0.01527 |
| 10 | C1 | PZ  | 0.00000  | -0.15672 | 0.00000  | 0.46187  | 0.00000  |
| 11 | C1 | S   | 0.70415  | 0.00000  | -1.10229 | 0.00000  | 0.14230  |
| 12 | C1 | PX  | -0.84845 | 0.00000  | 0.33114  | 0.00000  | -0.33809 |
| 13 | C1 | PY  | 0.86298  | 0.00000  | -0.65986 | 0.00000  | 0.27074  |
| 14 | C1 | PZ  | 0.00000  | 0.22774  | 0.00000  | -0.95542 | 0.00000  |
| 15 | C1 | DXX | -0.12183 | 0.00000  | -0.03698 | 0.00000  | -0.02373 |
| 16 | C1 | DYY | -0.05436 | 0.00000  | -0.03478 | 0.00000  | 0.01358  |
| 17 | C1 | DZZ | 0.08502  | 0.00000  | 0.00783  | 0.00000  | 0.00287  |
| 18 | C1 | DXY | 0.00584  | 0.00000  | 0.01709  | 0.00000  | 0.03253  |
| 19 | C1 | DXZ | 0.00000  | -0.01644 | 0.00000  | -0.02301 | 0.00000  |

|    |    |     |          |          |          |          |          |
|----|----|-----|----------|----------|----------|----------|----------|
| 20 | C1 | DYZ | 0.00000  | 0.02710  | 0.00000  | -0.02791 | 0.00000  |
| 21 | C2 | S   | 0.05445  | 0.00000  | -0.01156 | 0.00000  | -0.02222 |
| 22 | C2 | S   | 0.08319  | 0.00000  | 0.07179  | 0.00000  | -0.12196 |
| 23 | C2 | PX  | -0.03129 | 0.00000  | 0.06610  | 0.00000  | 0.03511  |
| 24 | C2 | PY  | -0.23285 | 0.00000  | 0.08509  | 0.00000  | -0.02970 |
| 25 | C2 | PZ  | 0.00000  | 0.29503  | 0.00000  | 0.06911  | 0.00000  |
| 26 | C2 | S   | -0.58379 | 0.00000  | -0.33960 | 0.00000  | 0.18629  |
| 27 | C2 | PX  | 0.34225  | 0.00000  | -0.68502 | 0.00000  | 0.29006  |
| 28 | C2 | PY  | -1.50115 | 0.00000  | 0.46260  | 0.00000  | -0.12505 |
| 29 | C2 | PZ  | 0.00000  | -0.59174 | 0.00000  | -0.05907 | 0.00000  |
| 30 | C2 | DXX | 0.09618  | 0.00000  | 0.01214  | 0.00000  | -0.05094 |
| 31 | C2 | DYY | 0.06226  | 0.00000  | -0.05582 | 0.00000  | -0.01831 |
| 32 | C2 | DZZ | -0.06793 | 0.00000  | 0.01615  | 0.00000  | 0.02551  |
| 33 | C2 | DXY | 0.00868  | 0.00000  | -0.01874 | 0.00000  | 0.02665  |
| 34 | C2 | DXZ | 0.00000  | 0.01525  | 0.00000  | 0.02282  | 0.00000  |
| 35 | C2 | DYZ | 0.00000  | -0.00253 | 0.00000  | 0.00610  | 0.00000  |
| 36 | C3 | S   | -0.01582 | 0.00000  | 0.00863  | 0.00000  | 0.00126  |
| 37 | C3 | S   | -0.19146 | 0.00000  | 0.17739  | 0.00000  | -0.10964 |
| 38 | C3 | PX  | 0.24530  | 0.00000  | -0.04789 | 0.00000  | 0.15762  |
| 39 | C3 | PY  | -0.22289 | 0.00000  | -0.05450 | 0.00000  | 0.21939  |
| 40 | C3 | PZ  | 0.00000  | -0.65606 | 0.00000  | -0.32864 | 0.00000  |
| 41 | C3 | S   | 0.09985  | 0.00000  | -0.33674 | 0.00000  | -0.25453 |
| 42 | C3 | PX  | 0.99313  | 0.00000  | -0.52446 | 0.00000  | 0.08703  |
| 43 | C3 | PY  | 1.03287  | 0.00000  | 0.32220  | 0.00000  | -0.20462 |
| 44 | C3 | PZ  | 0.00000  | 0.98464  | 0.00000  | 0.55541  | 0.00000  |
| 45 | C3 | DXX | -0.03010 | 0.00000  | 0.01574  | 0.00000  | -0.01374 |
| 46 | C3 | DYY | -0.06806 | 0.00000  | 0.02953  | 0.00000  | 0.00150  |
| 47 | C3 | DZZ | 0.01526  | 0.00000  | -0.00399 | 0.00000  | -0.00064 |
| 48 | C3 | DXY | 0.00308  | 0.00000  | -0.02449 | 0.00000  | 0.04554  |
| 49 | C3 | DXZ | 0.00000  | 0.02360  | 0.00000  | 0.00930  | 0.00000  |
| 50 | C3 | DYZ | 0.00000  | -0.02928 | 0.00000  | 0.06100  | 0.00000  |
| 51 | C4 | S   | 0.03968  | 0.00000  | -0.00085 | 0.00000  | -0.00046 |
| 52 | C4 | S   | -0.42280 | 0.00000  | -0.10270 | 0.00000  | -0.12075 |
| 53 | C4 | PX  | -0.09967 | 0.00000  | -0.24993 | 0.00000  | -0.22286 |
| 54 | C4 | PY  | 0.30436  | 0.00000  | -0.18184 | 0.00000  | -0.02685 |
| 55 | C4 | PZ  | 0.00000  | 0.57123  | 0.00000  | -0.35352 | 0.00000  |
| 56 | C4 | S   | 0.24497  | 0.00000  | 0.16905  | 0.00000  | 0.04372  |
| 57 | C4 | PX  | -1.61764 | 0.00000  | 2.18827  | 0.00000  | 0.17054  |
| 58 | C4 | PY  | 0.66486  | 0.00000  | 0.40570  | 0.00000  | 0.25751  |
| 59 | C4 | PZ  | 0.00000  | -1.05073 | 0.00000  | 0.83654  | 0.00000  |
| 60 | C4 | DXX | 0.02670  | 0.00000  | 0.02731  | 0.00000  | -0.00776 |
| 61 | C4 | DYY | -0.00806 | 0.00000  | -0.01026 | 0.00000  | 0.01808  |
| 62 | C4 | DZZ | -0.04244 | 0.00000  | -0.01901 | 0.00000  | -0.00926 |
| 63 | C4 | DXY | -0.05513 | 0.00000  | -0.00604 | 0.00000  | -0.00057 |
| 64 | C4 | DXZ | 0.00000  | -0.00308 | 0.00000  | -0.00181 | 0.00000  |
| 65 | C4 | DYZ | 0.00000  | 0.00274  | 0.00000  | -0.03244 | 0.00000  |
| 66 | C5 | S   | -0.04468 | 0.00000  | 0.00929  | 0.00000  | 0.02025  |
| 67 | C5 | S   | 0.20510  | 0.00000  | 0.22005  | 0.00000  | 0.01768  |
| 68 | C5 | PX  | 0.09496  | 0.00000  | 0.13582  | 0.00000  | 0.07697  |
| 69 | C5 | PY  | -0.18193 | 0.00000  | 0.28917  | 0.00000  | -0.03707 |
| 70 | C5 | PZ  | 0.00000  | -0.34308 | 0.00000  | 0.18726  | 0.00000  |
| 71 | C5 | S   | 0.30636  | 0.00000  | 0.63749  | 0.00000  | -0.00097 |
| 72 | C5 | PX  | -1.20725 | 0.00000  | 1.06499  | 0.00000  | -0.33890 |
| 73 | C5 | PY  | -1.33336 | 0.00000  | -0.23281 | 0.00000  | 0.08220  |

|     |    |     |          |          |          |          |          |
|-----|----|-----|----------|----------|----------|----------|----------|
| 74  | C5 | PZ  | 0.00000  | 0.80194  | 0.00000  | -0.42748 | 0.00000  |
| 75  | C5 | DXX | -0.02576 | 0.00000  | 0.08261  | 0.00000  | 0.03927  |
| 76  | C5 | DYY | -0.03889 | 0.00000  | 0.05840  | 0.00000  | 0.01858  |
| 77  | C5 | DZZ | 0.05420  | 0.00000  | -0.03352 | 0.00000  | -0.01455 |
| 78  | C5 | DXY | 0.01276  | 0.00000  | 0.01603  | 0.00000  | -0.03728 |
| 79  | C5 | DXZ | 0.00000  | 0.00210  | 0.00000  | 0.01801  | 0.00000  |
| 80  | C5 | DYZ | 0.00000  | -0.01292 | 0.00000  | -0.01392 | 0.00000  |
| 81  | C6 | S   | 0.00153  | 0.00000  | 0.02067  | 0.00000  | -0.05143 |
| 82  | C6 | S   | 0.25154  | 0.00000  | -0.18898 | 0.00000  | 0.08236  |
| 83  | C6 | PX  | -0.09277 | 0.00000  | 0.02622  | 0.00000  | 0.13379  |
| 84  | C6 | PY  | 0.29305  | 0.00000  | 0.15482  | 0.00000  | -0.39844 |
| 85  | C6 | PZ  | 0.00000  | -0.05743 | 0.00000  | -0.24174 | 0.00000  |
| 86  | C6 | S   | -0.49502 | 0.00000  | 0.74267  | 0.00000  | -0.17584 |
| 87  | C6 | PX  | 1.81713  | 0.00000  | -0.61606 | 0.00000  | 0.03615  |
| 88  | C6 | PY  | -0.46637 | 0.00000  | -0.20521 | 0.00000  | 0.44290  |
| 89  | C6 | PZ  | 0.00000  | 0.03948  | 0.00000  | 0.25618  | 0.00000  |
| 90  | C6 | DXX | 0.01698  | 0.00000  | -0.03489 | 0.00000  | 0.02796  |
| 91  | C6 | DYY | 0.05590  | 0.00000  | 0.06795  | 0.00000  | -0.14939 |
| 92  | C6 | DZZ | 0.00450  | 0.00000  | -0.02703 | 0.00000  | 0.05653  |
| 93  | C6 | DXY | -0.01589 | 0.00000  | -0.00790 | 0.00000  | -0.00547 |
| 94  | C6 | DXZ | 0.00000  | -0.02291 | 0.00000  | -0.02952 | 0.00000  |
| 95  | C6 | DYZ | 0.00000  | 0.01448  | 0.00000  | -0.00149 | 0.00000  |
| 96  | C7 | S   | 0.03062  | 0.00000  | -0.00724 | 0.00000  | -0.00276 |
| 97  | C7 | S   | -0.02730 | 0.00000  | 0.13868  | 0.00000  | -0.03185 |
| 98  | C7 | PX  | 0.11182  | 0.00000  | -0.05371 | 0.00000  | 0.16538  |
| 99  | C7 | PY  | -0.07571 | 0.00000  | 0.11411  | 0.00000  | -0.00520 |
| 100 | C7 | PZ  | 0.00000  | 0.45724  | 0.00000  | -0.17679 | 0.00000  |
| 101 | C7 | S   | 0.48636  | 0.00000  | 0.23891  | 0.00000  | 0.14995  |
| 102 | C7 | PX  | -0.49509 | 0.00000  | 0.06416  | 0.00000  | -0.79854 |
| 103 | C7 | PY  | -0.81085 | 0.00000  | 0.02140  | 0.00000  | 0.25584  |
| 104 | C7 | PZ  | 0.00000  | -0.78415 | 0.00000  | 0.38328  | 0.00000  |
| 105 | C7 | DXX | 0.03612  | 0.00000  | -0.00905 | 0.00000  | 0.03184  |
| 106 | C7 | DYY | 0.04948  | 0.00000  | 0.02094  | 0.00000  | -0.01289 |
| 107 | C7 | DZZ | -0.03690 | 0.00000  | 0.00678  | 0.00000  | -0.00672 |
| 108 | C7 | DXY | -0.01621 | 0.00000  | -0.01986 | 0.00000  | 0.03674  |
| 109 | C7 | DXZ | 0.00000  | -0.00995 | 0.00000  | 0.01139  | 0.00000  |
| 110 | C7 | DYZ | 0.00000  | -0.01842 | 0.00000  | -0.02856 | 0.00000  |
| 111 | O1 | S   | 0.00894  | 0.00000  | 0.00058  | 0.00000  | 0.00404  |
| 112 | O1 | S   | 0.01789  | 0.00000  | -0.17890 | 0.00000  | -0.09474 |
| 113 | O1 | PX  | 0.06824  | 0.00000  | -0.27921 | 0.00000  | -0.08834 |
| 114 | O1 | PY  | -0.08245 | 0.00000  | -0.02057 | 0.00000  | -0.04542 |
| 115 | O1 | PZ  | 0.00000  | 0.08761  | 0.00000  | 0.01137  | 0.00000  |
| 116 | O1 | S   | -0.36982 | 0.00000  | 0.21415  | 0.00000  | 0.03654  |
| 117 | O1 | PX  | 0.22220  | 0.00000  | -0.08799 | 0.00000  | 0.06574  |
| 118 | O1 | PY  | 0.15115  | 0.00000  | -0.15725 | 0.00000  | -0.02579 |
| 119 | O1 | PZ  | 0.00000  | 0.03685  | 0.00000  | -0.13447 | 0.00000  |
| 120 | O1 | DXX | 0.00140  | 0.00000  | 0.01741  | 0.00000  | -0.00606 |
| 121 | O1 | DYY | 0.00212  | 0.00000  | -0.11471 | 0.00000  | -0.05759 |
| 122 | O1 | DZZ | 0.01727  | 0.00000  | -0.04325 | 0.00000  | -0.01168 |
| 123 | O1 | DXY | 0.01307  | 0.00000  | -0.02009 | 0.00000  | 0.00139  |
| 124 | O1 | DXZ | 0.00000  | -0.02201 | 0.00000  | -0.02728 | 0.00000  |
| 125 | O1 | DYZ | 0.00000  | -0.02331 | 0.00000  | 0.01362  | 0.00000  |
| 126 | H4 | S   | -0.22350 | 0.00000  | 0.13963  | 0.00000  | 0.17361  |
| 127 | H4 | S   | 0.23587  | 0.00000  | 0.41663  | 0.00000  | -0.31007 |



|     |     |     |          |          |          |          |          |
|-----|-----|-----|----------|----------|----------|----------|----------|
| 128 | H4  | PX  | -0.00223 | 0.00000  | -0.00424 | 0.00000  | -0.02445 |
| 129 | H4  | PY  | -0.01488 | 0.00000  | -0.00969 | 0.00000  | 0.01085  |
| 130 | H4  | PZ  | 0.00000  | 0.00416  | 0.00000  | -0.01005 | 0.00000  |
| 131 | N1  | S   | -0.00401 | 0.00000  | -0.01076 | 0.00000  | 0.02509  |
| 132 | N1  | S   | 0.04179  | 0.00000  | -0.00154 | 0.00000  | -0.04174 |
| 133 | N1  | PX  | 0.00605  | 0.00000  | 0.23705  | 0.00000  | -0.52713 |
| 134 | N1  | PY  | 0.07243  | 0.00000  | 0.16293  | 0.00000  | -0.35099 |
| 135 | N1  | PZ  | 0.00000  | 0.03789  | 0.00000  | 0.14075  | 0.00000  |
| 136 | N1  | S   | -0.37754 | 0.00000  | -0.53573 | 0.00000  | 0.91469  |
| 137 | N1  | PX  | -0.56519 | 0.00000  | -0.21224 | 0.00000  | 0.82705  |
| 138 | N1  | PY  | 0.35273  | 0.00000  | -0.20536 | 0.00000  | 0.11667  |
| 139 | N1  | PZ  | 0.00000  | -0.03380 | 0.00000  | 0.03233  | 0.00000  |
| 140 | N1  | DXX | 0.00986  | 0.00000  | -0.04723 | 0.00000  | 0.08964  |
| 141 | N1  | DYY | -0.03924 | 0.00000  | -0.08362 | 0.00000  | 0.15134  |
| 142 | N1  | DZZ | 0.01075  | 0.00000  | 0.03039  | 0.00000  | -0.04902 |
| 143 | N1  | DXY | 0.02064  | 0.00000  | 0.01038  | 0.00000  | -0.02072 |
| 144 | N1  | DXZ | 0.00000  | 0.02497  | 0.00000  | 0.03435  | 0.00000  |
| 145 | N1  | DYZ | 0.00000  | -0.01414 | 0.00000  | -0.01616 | 0.00000  |
| 146 | H6  | S   | 0.24167  | 0.00000  | -0.07412 | 0.00000  | -0.02869 |
| 147 | H6  | S   | -0.22961 | 0.00000  | -0.22849 | 0.00000  | 0.19131  |
| 148 | H6  | PX  | -0.01792 | 0.00000  | -0.00119 | 0.00000  | 0.00098  |
| 149 | H6  | PY  | -0.00930 | 0.00000  | 0.00590  | 0.00000  | -0.00339 |
| 150 | H6  | PZ  | 0.00000  | -0.00855 | 0.00000  | -0.00622 | 0.00000  |
| 151 | C8  | S   | 0.01030  | 0.00000  | -0.00277 | 0.00000  | -0.00701 |
| 152 | C8  | S   | 0.16149  | 0.00000  | -0.13576 | 0.00000  | 0.24649  |
| 153 | C8  | PX  | 0.08873  | 0.00000  | 0.14909  | 0.00000  | -0.31373 |
| 154 | C8  | PY  | 0.10064  | 0.00000  | -0.16715 | 0.00000  | 0.27296  |
| 155 | C8  | PZ  | 0.00000  | 0.12806  | 0.00000  | 0.72622  | 0.00000  |
| 156 | C8  | S   | -0.35120 | 0.00000  | 0.37545  | 0.00000  | -1.07949 |
| 157 | C8  | PX  | -1.02773 | 0.00000  | -0.33543 | 0.00000  | 0.90358  |
| 158 | C8  | PY  | -0.55340 | 0.00000  | 0.42030  | 0.00000  | -0.89606 |
| 159 | C8  | PZ  | 0.00000  | -0.09818 | 0.00000  | -1.27280 | 0.00000  |
| 160 | C8  | DXX | 0.01000  | 0.00000  | 0.02415  | 0.00000  | -0.06812 |
| 161 | C8  | DYY | 0.03283  | 0.00000  | -0.03588 | 0.00000  | 0.04277  |
| 162 | C8  | DZZ | 0.00230  | 0.00000  | -0.00695 | 0.00000  | 0.02738  |
| 163 | C8  | DXY | -0.03100 | 0.00000  | -0.02628 | 0.00000  | 0.05697  |
| 164 | C8  | DXZ | 0.00000  | -0.01367 | 0.00000  | -0.01873 | 0.00000  |
| 165 | C8  | DYZ | 0.00000  | 0.04628  | 0.00000  | 0.03309  | 0.00000  |
| 166 | H8  | S   | 0.13098  | 0.00000  | -0.00663 | 0.00000  | 0.03386  |
| 167 | H8  | S   | 0.06326  | 0.00000  | -0.02369 | 0.00000  | 0.36900  |
| 168 | H8  | PX  | 0.00491  | 0.00000  | -0.00011 | 0.00000  | -0.01372 |
| 169 | H8  | PY  | -0.01404 | 0.00000  | -0.00314 | 0.00000  | 0.00639  |
| 170 | H8  | PZ  | 0.00000  | -0.00923 | 0.00000  | 0.01094  | 0.00000  |
| 171 | C10 | S   | -0.00015 | 0.00000  | 0.01482  | 0.00000  | -0.02336 |
| 172 | C10 | S   | 0.15640  | 0.00000  | 0.03953  | 0.00000  | -0.15118 |
| 173 | C10 | PX  | -0.08370 | 0.00000  | 0.00808  | 0.00000  | -0.04121 |
| 174 | C10 | PY  | 0.05822  | 0.00000  | -0.08002 | 0.00000  | 0.09289  |
| 175 | C10 | PZ  | 0.00000  | -0.18885 | 0.00000  | -0.26368 | 0.00000  |
| 176 | C10 | S   | -0.38094 | 0.00000  | 0.02799  | 0.00000  | 0.00759  |
| 177 | C10 | PX  | 0.47880  | 0.00000  | 0.03097  | 0.00000  | 0.02850  |
| 178 | C10 | PY  | -0.05516 | 0.00000  | 0.09845  | 0.00000  | -0.11322 |
| 179 | C10 | PZ  | 0.00000  | 0.27487  | 0.00000  | 0.64716  | 0.00000  |
| 180 | C10 | DXX | 0.02142  | 0.00000  | 0.00682  | 0.00000  | -0.01809 |
| 181 | C10 | DYY | -0.00313 | 0.00000  | 0.03757  | 0.00000  | -0.06296 |

|     |     |     |          |          |          |          |          |
|-----|-----|-----|----------|----------|----------|----------|----------|
| 182 | C10 | DZZ | 0.00489  | 0.00000  | -0.01541 | 0.00000  | 0.02370  |
| 183 | C10 | DXY | -0.00588 | 0.00000  | -0.00204 | 0.00000  | 0.00431  |
| 184 | C10 | DXZ | 0.00000  | -0.01134 | 0.00000  | 0.00449  | 0.00000  |
| 185 | C10 | DYZ | 0.00000  | -0.01745 | 0.00000  | 0.00594  | 0.00000  |
| 186 | H16 | S   | 0.06160  | 0.00000  | 0.04543  | 0.00000  | -0.11075 |
| 187 | H16 | S   | -0.21335 | 0.00000  | 0.01788  | 0.00000  | -0.07932 |
| 188 | H16 | PX  | 0.00837  | 0.00000  | -0.00060 | 0.00000  | 0.00480  |
| 189 | H16 | PY  | -0.01045 | 0.00000  | -0.01035 | 0.00000  | 0.02196  |
| 190 | H16 | PZ  | 0.00000  | -0.00077 | 0.00000  | 0.00816  | 0.00000  |
| 191 | H18 | S   | -0.01020 | 0.00000  | 0.04418  | 0.00000  | -0.03795 |
| 192 | H18 | S   | 0.22168  | 0.00000  | -0.00319 | 0.00000  | 0.03310  |
| 193 | H18 | PX  | -0.00048 | 0.00000  | 0.00039  | 0.00000  | 0.00272  |
| 194 | H18 | PY  | 0.01279  | 0.00000  | 0.00140  | 0.00000  | -0.00552 |
| 195 | H18 | PZ  | 0.00000  | 0.00649  | 0.00000  | 0.00355  | 0.00000  |
| 196 | C9  | S   | -0.01667 | 0.00000  | -0.04403 | 0.00000  | -0.03362 |
| 197 | C9  | S   | 0.07124  | 0.00000  | -0.11890 | 0.00000  | -0.07189 |
| 198 | C9  | PX  | 0.18050  | 0.00000  | -0.02766 | 0.00000  | 0.07048  |
| 199 | C9  | PY  | -0.20128 | 0.00000  | -0.60655 | 0.00000  | -0.30858 |
| 200 | C9  | PZ  | 0.00000  | -0.14874 | 0.00000  | -0.17265 | 0.00000  |
| 201 | C9  | S   | 0.01042  | 0.00000  | 0.85278  | 0.00000  | 0.51585  |
| 202 | C9  | PX  | -0.23178 | 0.00000  | -0.03914 | 0.00000  | -0.10921 |
| 203 | C9  | PY  | 0.58116  | 0.00000  | 1.66054  | 0.00000  | 0.91428  |
| 204 | C9  | PZ  | 0.00000  | 0.32304  | 0.00000  | 0.19766  | 0.00000  |
| 205 | C9  | DXX | 0.01338  | 0.00000  | -0.11671 | 0.00000  | -0.04676 |
| 206 | C9  | DYY | -0.04070 | 0.00000  | 0.07667  | 0.00000  | -0.00633 |
| 207 | C9  | DZZ | 0.01510  | 0.00000  | -0.04431 | 0.00000  | -0.01481 |
| 208 | C9  | DXY | 0.01926  | 0.00000  | 0.03792  | 0.00000  | 0.03050  |
| 209 | C9  | DXZ | 0.00000  | 0.00711  | 0.00000  | 0.05762  | 0.00000  |
| 210 | C9  | DYZ | 0.00000  | 0.03534  | 0.00000  | -0.02829 | 0.00000  |
| 211 | H3  | S   | -0.25672 | 0.00000  | -0.10202 | 0.00000  | -0.21540 |
| 212 | H3  | S   | -0.15471 | 0.00000  | -1.27083 | 0.00000  | -0.57564 |
| 213 | H3  | PX  | -0.00150 | 0.00000  | 0.02033  | 0.00000  | 0.00999  |
| 214 | H3  | PY  | 0.00351  | 0.00000  | 0.06183  | 0.00000  | 0.01947  |
| 215 | H3  | PZ  | 0.00000  | 0.01590  | 0.00000  | -0.01793 | 0.00000  |
| 216 | H5  | S   | 0.00874  | 0.02411  | -0.26379 | -0.15642 | -0.13565 |
| 217 | H5  | S   | 0.02044  | 0.07300  | 0.17017  | 0.22212  | 0.05723  |
| 218 | H5  | PX  | -0.00858 | -0.01544 | -0.04466 | -0.02015 | -0.02384 |
| 219 | H5  | PY  | 0.01640  | -0.01355 | 0.00540  | 0.00499  | 0.01525  |
| 220 | H5  | PZ  | 0.01613  | 0.01128  | 0.02346  | 0.01714  | 0.01656  |
| 221 | H7  | S   | 0.00874  | -0.02411 | -0.26379 | 0.15642  | -0.13565 |
| 222 | H7  | S   | 0.02044  | -0.07300 | 0.17017  | -0.22212 | 0.05723  |
| 223 | H7  | PX  | -0.00858 | 0.01544  | -0.04466 | 0.02015  | -0.02384 |
| 224 | H7  | PY  | 0.01640  | 0.01355  | 0.00540  | -0.00499 | 0.01525  |
| 225 | H7  | PZ  | -0.01613 | 0.01128  | -0.02346 | 0.01714  | -0.01656 |

|              |          |          |          |          |          |
|--------------|----------|----------|----------|----------|----------|
| MO:          | 91       | 92       | 93       | 94       | 95       |
| Eigenvalues: | 1.03696  | 1.05039  | 1.05945  | 1.08470  | 1.09571  |
| (ev):        | 28.21712 | 28.58250 | 28.82904 | 29.51622 | 29.81568 |

|   |    |    |         |          |          |          |          |
|---|----|----|---------|----------|----------|----------|----------|
|   |    | A  | A       | A        | A        | A        |          |
| 1 | H1 | S  | 0.00000 | -0.03631 | -0.15787 | -0.24662 | 0.05396  |
| 2 | H1 | S  | 0.00000 | -0.18511 | 0.99060  | 1.69870  | -0.46265 |
| 3 | H1 | PX | 0.00000 | 0.00583  | -0.05003 | -0.09496 | 0.02362  |
| 4 | H1 | PY | 0.00000 | 0.00476  | -0.03914 | -0.04044 | -0.00215 |

|    |    |     |          |          |          |          |          |
|----|----|-----|----------|----------|----------|----------|----------|
| 5  | H1 | PZ  | -0.02666 | 0.00000  | 0.00000  | 0.00000  | 0.00000  |
| 6  | C1 | S   | 0.00000  | -0.00128 | -0.02001 | -0.02458 | 0.01016  |
| 7  | C1 | S   | 0.00000  | 0.12555  | 0.20064  | 0.28612  | -0.04367 |
| 8  | C1 | PX  | 0.00000  | -0.12678 | 0.31169  | 0.55259  | -0.14050 |
| 9  | C1 | PY  | 0.00000  | 0.01865  | 0.04827  | 0.28326  | -0.05161 |
| 10 | C1 | PZ  | 0.12260  | 0.00000  | 0.00000  | 0.00000  | 0.00000  |
| 11 | C1 | S   | 0.00000  | -0.13628 | -0.37854 | -0.24934 | -0.95596 |
| 12 | C1 | PX  | 0.00000  | 0.36586  | -1.12336 | -2.05295 | 0.87377  |
| 13 | C1 | PY  | 0.00000  | 0.08707  | -0.29613 | -1.01430 | 0.48399  |
| 14 | C1 | PZ  | -0.70709 | 0.00000  | 0.00000  | 0.00000  | 0.00000  |
| 15 | C1 | DXX | 0.00000  | 0.01169  | -0.04465 | -0.08361 | 0.00533  |
| 16 | C1 | DYY | 0.00000  | -0.00295 | 0.01047  | 0.06174  | -0.00869 |
| 17 | C1 | DZZ | 0.00000  | 0.00592  | 0.05267  | 0.04646  | -0.00736 |
| 18 | C1 | DXY | 0.00000  | -0.00881 | -0.06935 | -0.04084 | 0.01642  |
| 19 | C1 | DXZ | -0.01467 | 0.00000  | 0.00000  | 0.00000  | 0.00000  |
| 20 | C1 | DYZ | -0.01162 | 0.00000  | 0.00000  | 0.00000  | 0.00000  |
| 21 | C2 | S   | 0.00000  | 0.00532  | 0.00078  | -0.01145 | 0.02793  |
| 22 | C2 | S   | 0.00000  | -0.25025 | -0.10659 | 0.14916  | -0.41492 |
| 23 | C2 | PX  | 0.00000  | 0.10230  | 0.05869  | -0.26949 | 0.57143  |
| 24 | C2 | PY  | 0.00000  | 0.05687  | 0.11160  | -0.12437 | 0.19551  |
| 25 | C2 | PZ  | -0.34990 | 0.00000  | 0.00000  | 0.00000  | 0.00000  |
| 26 | C2 | S   | 0.00000  | -0.35057 | 0.04718  | 0.32318  | 0.91828  |
| 27 | C2 | PX  | 0.00000  | -0.55561 | -0.28901 | 1.28879  | -2.08669 |
| 28 | C2 | PY  | 0.00000  | -0.42664 | -0.23626 | 0.58434  | -0.54618 |
| 29 | C2 | PZ  | 1.03970  | 0.00000  | 0.00000  | 0.00000  | 0.00000  |
| 30 | C2 | DXX | 0.00000  | -0.01552 | 0.01682  | -0.04066 | 0.07138  |
| 31 | C2 | DYY | 0.00000  | -0.02843 | -0.02017 | 0.05691  | -0.04275 |
| 32 | C2 | DZZ | 0.00000  | 0.00337  | -0.01192 | 0.01716  | -0.05721 |
| 33 | C2 | DXY | 0.00000  | 0.01592  | 0.00812  | 0.00467  | 0.07006  |
| 34 | C2 | DXZ | -0.01632 | 0.00000  | 0.00000  | 0.00000  | 0.00000  |
| 35 | C2 | DYZ | 0.02082  | 0.00000  | 0.00000  | 0.00000  | 0.00000  |
| 36 | C3 | S   | 0.00000  | 0.00077  | -0.01559 | 0.00988  | -0.00206 |
| 37 | C3 | S   | 0.00000  | 0.06431  | -0.19429 | 0.21427  | 0.09247  |
| 38 | C3 | PX  | 0.00000  | 0.06778  | -0.03138 | -0.21534 | 0.00341  |
| 39 | C3 | PY  | 0.00000  | -0.13295 | -0.09612 | 0.12525  | 0.07870  |
| 40 | C3 | PZ  | -0.55244 | 0.00000  | 0.00000  | 0.00000  | 0.00000  |
| 41 | C3 | S   | 0.00000  | -0.23682 | -1.02897 | -1.11290 | -0.09854 |
| 42 | C3 | PX  | 0.00000  | -0.45898 | 0.44022  | 1.04085  | 0.35349  |
| 43 | C3 | PY  | 0.00000  | 0.59842  | 0.56292  | -0.68465 | 0.33064  |
| 44 | C3 | PZ  | 1.42463  | 0.00000  | 0.00000  | 0.00000  | 0.00000  |
| 45 | C3 | DXX | 0.00000  | -0.00435 | -0.00628 | 0.04126  | -0.01991 |
| 46 | C3 | DYY | 0.00000  | 0.00039  | -0.10795 | -0.03508 | 0.03570  |
| 47 | C3 | DZZ | 0.00000  | 0.01075  | 0.03117  | 0.00802  | 0.00634  |
| 48 | C3 | DXY | 0.00000  | 0.03313  | 0.03595  | -0.02265 | 0.00239  |
| 49 | C3 | DXZ | -0.01113 | 0.00000  | 0.00000  | 0.00000  | 0.00000  |
| 50 | C3 | DYZ | -0.00228 | 0.00000  | 0.00000  | 0.00000  | 0.00000  |
| 51 | C4 | S   | 0.00000  | 0.00982  | 0.00137  | -0.00570 | -0.03230 |
| 52 | C4 | S   | 0.00000  | 0.14070  | 0.05695  | -0.04576 | -0.00212 |
| 53 | C4 | PX  | 0.00000  | -0.06726 | 0.08550  | -0.06239 | -0.03773 |
| 54 | C4 | PY  | 0.00000  | -0.03284 | -0.03421 | -0.01374 | 0.09524  |
| 55 | C4 | PZ  | -0.24153 | 0.00000  | 0.00000  | 0.00000  | 0.00000  |
| 56 | C4 | S   | 0.00000  | -0.10206 | -0.22687 | -0.10039 | -0.55333 |
| 57 | C4 | PX  | 0.00000  | -0.02167 | -0.17409 | 0.19109  | 0.66243  |
| 58 | C4 | PY  | 0.00000  | 0.41599  | 0.46689  | 0.34399  | -1.50605 |

|     |    |     |          |          |          |          |          |
|-----|----|-----|----------|----------|----------|----------|----------|
| 59  | C4 | PZ  | 0.75603  | 0.00000  | 0.00000  | 0.00000  | 0.00000  |
| 60  | C4 | DXX | 0.00000  | 0.01456  | 0.01540  | 0.02035  | -0.03016 |
| 61  | C4 | DYY | 0.00000  | 0.03085  | -0.01206 | -0.04563 | -0.11498 |
| 62  | C4 | DZZ | 0.00000  | -0.00533 | 0.00606  | 0.00856  | 0.03968  |
| 63  | C4 | DXY | 0.00000  | -0.02447 | 0.02419  | 0.04012  | -0.06221 |
| 64  | C4 | DXZ | -0.00939 | 0.00000  | 0.00000  | 0.00000  | 0.00000  |
| 65  | C4 | DYZ | -0.02157 | 0.00000  | 0.00000  | 0.00000  | 0.00000  |
| 66  | C5 | S   | 0.00000  | -0.00395 | 0.01022  | 0.01747  | -0.00484 |
| 67  | C5 | S   | 0.00000  | 0.08271  | 0.03889  | -0.09143 | -0.60564 |
| 68  | C5 | PX  | 0.00000  | -0.11692 | 0.15902  | 0.24441  | 0.03173  |
| 69  | C5 | PY  | 0.00000  | -0.00030 | -0.02739 | -0.24496 | -0.34615 |
| 70  | C5 | PZ  | 0.28413  | 0.00000  | 0.00000  | 0.00000  | 0.00000  |
| 71  | C5 | S   | 0.00000  | 0.33898  | 0.13620  | -0.21827 | 1.91362  |
| 72  | C5 | PX  | 0.00000  | 0.25490  | -0.32178 | -0.83575 | 0.31499  |
| 73  | C5 | PY  | 0.00000  | -0.53402 | 0.01922  | 1.05320  | 1.09794  |
| 74  | C5 | PZ  | -0.82824 | 0.00000  | 0.00000  | 0.00000  | 0.00000  |
| 75  | C5 | DXX | 0.00000  | 0.00910  | 0.01528  | 0.04339  | -0.06258 |
| 76  | C5 | DYY | 0.00000  | 0.01089  | 0.02702  | -0.02812 | 0.01455  |
| 77  | C5 | DZZ | 0.00000  | 0.00798  | -0.01086 | -0.02255 | -0.03272 |
| 78  | C5 | DXY | 0.00000  | 0.02302  | -0.02535 | -0.05637 | -0.03494 |
| 79  | C5 | DXZ | 0.00850  | 0.00000  | 0.00000  | 0.00000  | 0.00000  |
| 80  | C5 | DYZ | -0.00531 | 0.00000  | 0.00000  | 0.00000  | 0.00000  |
| 81  | C6 | S   | 0.00000  | -0.00145 | 0.00849  | -0.00332 | -0.01131 |
| 82  | C6 | S   | 0.00000  | -0.51445 | -0.12791 | -0.13738 | 0.01389  |
| 83  | C6 | PX  | 0.00000  | 0.12802  | 0.03015  | -0.01099 | -0.06690 |
| 84  | C6 | PY  | 0.00000  | 0.32950  | 0.18391  | -0.00062 | -0.07714 |
| 85  | C6 | PZ  | 0.61103  | 0.00000  | 0.00000  | 0.00000  | 0.00000  |
| 86  | C6 | S   | 0.00000  | -0.40963 | 0.03941  | 0.66179  | 0.52865  |
| 87  | C6 | PX  | 0.00000  | -0.49228 | -0.03284 | 0.29020  | 0.40371  |
| 88  | C6 | PY  | 0.00000  | 0.47921  | 0.34456  | -0.33203 | 1.19635  |
| 89  | C6 | PZ  | -1.45643 | 0.00000  | 0.00000  | 0.00000  | 0.00000  |
| 90  | C6 | DXX | 0.00000  | -0.07163 | -0.00733 | 0.01753  | 0.00777  |
| 91  | C6 | DYY | 0.00000  | -0.08556 | -0.00911 | -0.02179 | 0.00964  |
| 92  | C6 | DZZ | 0.00000  | 0.01326  | -0.00382 | -0.00748 | -0.00035 |
| 93  | C6 | DXY | 0.00000  | 0.04219  | 0.02026  | 0.04583  | -0.03169 |
| 94  | C6 | DXZ | 0.02212  | 0.00000  | 0.00000  | 0.00000  | 0.00000  |
| 95  | C6 | DYZ | -0.03439 | 0.00000  | 0.00000  | 0.00000  | 0.00000  |
| 96  | C7 | S   | 0.00000  | 0.01274  | -0.03250 | -0.00345 | -0.00045 |
| 97  | C7 | S   | 0.00000  | -0.01508 | 0.17870  | 0.26854  | -0.06528 |
| 98  | C7 | PX  | 0.00000  | -0.08260 | 0.73399  | 0.04456  | 0.00203  |
| 99  | C7 | PY  | 0.00000  | -0.18322 | 0.02451  | 0.11007  | 0.01669  |
| 100 | C7 | PZ  | 0.16376  | 0.00000  | 0.00000  | 0.00000  | 0.00000  |
| 101 | C7 | S   | 0.00000  | 1.10378  | 0.11877  | -0.16220 | 0.24397  |
| 102 | C7 | PX  | 0.00000  | -0.30898 | -3.10671 | -0.34940 | -0.07334 |
| 103 | C7 | PY  | 0.00000  | 0.31428  | 0.06300  | -0.63836 | -0.18943 |
| 104 | C7 | PZ  | -0.71505 | 0.00000  | 0.00000  | 0.00000  | 0.00000  |
| 105 | C7 | DXX | 0.00000  | 0.03544  | -0.06211 | 0.00245  | -0.00053 |
| 106 | C7 | DYY | 0.00000  | 0.03177  | 0.04087  | 0.04434  | -0.00892 |
| 107 | C7 | DZZ | 0.00000  | -0.01744 | 0.05805  | 0.00770  | -0.00380 |
| 108 | C7 | DXY | 0.00000  | -0.02436 | -0.01239 | 0.04876  | 0.00348  |
| 109 | C7 | DXZ | 0.01713  | 0.00000  | 0.00000  | 0.00000  | 0.00000  |
| 110 | C7 | DYZ | -0.00476 | 0.00000  | 0.00000  | 0.00000  | 0.00000  |
| 111 | O1 | S   | 0.00000  | 0.00353  | 0.00103  | 0.00106  | -0.01010 |
| 112 | O1 | S   | 0.00000  | -0.00739 | 0.03450  | 0.09153  | 0.14602  |

|     |    |     |          |          |          |          |          |
|-----|----|-----|----------|----------|----------|----------|----------|
| 113 | O1 | PX  | 0.00000  | 0.05402  | 0.00064  | -0.00665 | 0.02284  |
| 114 | O1 | PY  | 0.00000  | -0.00856 | -0.00443 | 0.02611  | 0.33820  |
| 115 | O1 | PZ  | 0.05845  | 0.00000  | 0.00000  | 0.00000  | 0.00000  |
| 116 | O1 | S   | 0.00000  | -0.17232 | -0.18604 | -0.25715 | 0.45353  |
| 117 | O1 | PX  | 0.00000  | -0.02427 | 0.05826  | 0.07036  | -0.05283 |
| 118 | O1 | PY  | 0.00000  | 0.12283  | 0.08360  | 0.01320  | -0.79896 |
| 119 | O1 | PZ  | -0.18666 | 0.00000  | 0.00000  | 0.00000  | 0.00000  |
| 120 | O1 | DXX | 0.00000  | -0.00775 | 0.01303  | 0.03607  | 0.06983  |
| 121 | O1 | DYY | 0.00000  | -0.01199 | 0.00309  | 0.01809  | 0.08832  |
| 122 | O1 | DZZ | 0.00000  | 0.00131  | 0.01074  | 0.03348  | 0.02293  |
| 123 | O1 | DXY | 0.00000  | 0.00550  | -0.00517 | 0.01055  | 0.00777  |
| 124 | O1 | DXZ | -0.01964 | 0.00000  | 0.00000  | 0.00000  | 0.00000  |
| 125 | O1 | DYZ | 0.00163  | 0.00000  | 0.00000  | 0.00000  | 0.00000  |
| 126 | H4 | S   | 0.00000  | -0.06353 | 0.05412  | 0.18933  | 0.01884  |
| 127 | H4 | S   | 0.00000  | 0.33268  | -0.25393 | -0.94894 | -0.76371 |
| 128 | H4 | PX  | 0.00000  | 0.00485  | -0.01243 | -0.04372 | -0.04017 |
| 129 | H4 | PY  | 0.00000  | -0.01919 | 0.01665  | 0.04080  | 0.03091  |
| 130 | H4 | PZ  | -0.01797 | 0.00000  | 0.00000  | 0.00000  | 0.00000  |
| 131 | N1 | S   | 0.00000  | -0.06139 | -0.01427 | -0.00338 | 0.00197  |
| 132 | N1 | S   | 0.00000  | 0.20014  | 0.00156  | 0.06143  | -0.07354 |
| 133 | N1 | PX  | 0.00000  | -0.31201 | -0.01927 | 0.03029  | 0.09529  |
| 134 | N1 | PY  | 0.00000  | -0.17821 | 0.02157  | -0.04711 | -0.08478 |
| 135 | N1 | PZ  | 0.15801  | 0.00000  | 0.00000  | 0.00000  | 0.00000  |
| 136 | N1 | S   | 0.00000  | 0.26729  | 1.13423  | -0.84569 | 0.37370  |
| 137 | N1 | PX  | 0.00000  | 0.89785  | 0.38862  | -0.14733 | -0.32382 |
| 138 | N1 | PY  | 0.00000  | 1.23290  | 0.31677  | 0.08477  | 0.33164  |
| 139 | N1 | PZ  | -0.05732 | 0.00000  | 0.00000  | 0.00000  | 0.00000  |
| 140 | N1 | DXX | 0.00000  | -0.05617 | 0.03979  | -0.02669 | -0.02835 |
| 141 | N1 | DYY | 0.00000  | 0.01344  | -0.02460 | -0.01630 | 0.00675  |
| 142 | N1 | DZZ | 0.00000  | 0.14508  | 0.00343  | 0.04399  | -0.01890 |
| 143 | N1 | DXY | 0.00000  | -0.01980 | -0.01701 | 0.02206  | 0.00533  |
| 144 | N1 | DXZ | 0.01472  | 0.00000  | 0.00000  | 0.00000  | 0.00000  |
| 145 | N1 | DYZ | 0.03651  | 0.00000  | 0.00000  | 0.00000  | 0.00000  |
| 146 | H6 | S   | 0.00000  | 0.00307  | -0.01421 | -0.11910 | 0.25773  |
| 147 | H6 | S   | 0.00000  | -0.36641 | -0.27609 | 0.94293  | -1.74895 |
| 148 | H6 | PX  | 0.00000  | -0.01099 | -0.01355 | 0.04506  | -0.10102 |
| 149 | H6 | PY  | 0.00000  | -0.03275 | -0.00063 | 0.01719  | -0.02803 |
| 150 | H6 | PZ  | 0.02315  | 0.00000  | 0.00000  | 0.00000  | 0.00000  |
| 151 | C8 | S   | 0.00000  | -0.01741 | -0.00655 | 0.00975  | 0.00239  |
| 152 | C8 | S   | 0.00000  | -0.61982 | -0.05829 | 0.01649  | -0.04311 |
| 153 | C8 | PX  | 0.00000  | 0.41679  | -0.06480 | 0.22705  | 0.07429  |
| 154 | C8 | PY  | 0.00000  | -0.08129 | 0.09239  | 0.10183  | -0.04054 |
| 155 | C8 | PZ  | -0.39775 | 0.00000  | 0.00000  | 0.00000  | 0.00000  |
| 156 | C8 | S   | 0.00000  | 0.82808  | -0.89763 | -0.02811 | 0.04669  |
| 157 | C8 | PX  | 0.00000  | -0.82734 | 1.00103  | -1.31261 | -0.58011 |
| 158 | C8 | PY  | 0.00000  | -0.93337 | -1.52459 | -0.78680 | 0.33858  |
| 159 | C8 | PZ  | 0.84236  | 0.00000  | 0.00000  | 0.00000  | 0.00000  |
| 160 | C8 | DXX | 0.00000  | -0.05058 | -0.01243 | 0.00327  | 0.01097  |
| 161 | C8 | DYY | 0.00000  | -0.11508 | -0.07989 | 0.01489  | 0.00053  |
| 162 | C8 | DZZ | 0.00000  | 0.01426  | 0.03002  | -0.00670 | -0.00780 |
| 163 | C8 | DXY | 0.00000  | 0.06506  | -0.07396 | 0.02839  | -0.01177 |
| 164 | C8 | DXZ | -0.01327 | 0.00000  | 0.00000  | 0.00000  | 0.00000  |
| 165 | C8 | DYZ | -0.00430 | 0.00000  | 0.00000  | 0.00000  | 0.00000  |
| 166 | H8 | S   | 0.00000  | 0.14150  | -0.11305 | -0.07125 | 0.02550  |

|     |     |     |          |          |          |          |          |
|-----|-----|-----|----------|----------|----------|----------|----------|
| 167 | H8  | S   | 0.00000  | -0.03840 | 2.01648  | 0.28866  | -0.03398 |
| 168 | H8  | PX  | 0.00000  | 0.02297  | -0.10216 | -0.01605 | 0.00340  |
| 169 | H8  | PY  | 0.00000  | 0.00128  | -0.00089 | 0.02127  | 0.00316  |
| 170 | H8  | PZ  | -0.01513 | 0.00000  | 0.00000  | 0.00000  | 0.00000  |
| 171 | C10 | S   | 0.00000  | 0.01214  | -0.00780 | 0.00094  | -0.00108 |
| 172 | C10 | S   | 0.00000  | -0.31063 | 0.06965  | 0.07535  | 0.02058  |
| 173 | C10 | PX  | 0.00000  | -0.03724 | 0.57430  | -0.58020 | -0.09354 |
| 174 | C10 | PY  | 0.00000  | -0.08205 | 0.07567  | -0.08537 | 0.00643  |
| 175 | C10 | PZ  | 0.04703  | 0.00000  | 0.00000  | 0.00000  | 0.00000  |
| 176 | C10 | S   | 0.00000  | -0.41712 | -1.11317 | -0.45587 | 0.27666  |
| 177 | C10 | PX  | 0.00000  | 0.40253  | -1.63362 | 1.94013  | 0.33411  |
| 178 | C10 | PY  | 0.00000  | 0.02398  | -0.56424 | 0.16725  | 0.17763  |
| 179 | C10 | PZ  | -0.27803 | 0.00000  | 0.00000  | 0.00000  | 0.00000  |
| 180 | C10 | DXX | 0.00000  | 0.01870  | -0.03795 | 0.03882  | -0.00232 |
| 181 | C10 | DYY | 0.00000  | -0.03435 | 0.01310  | -0.03512 | 0.00807  |
| 182 | C10 | DZZ | 0.00000  | -0.00664 | 0.03087  | 0.00388  | -0.00128 |
| 183 | C10 | DXY | 0.00000  | -0.01927 | 0.07426  | -0.06973 | -0.00275 |
| 184 | C10 | DXZ | -0.01220 | 0.00000  | 0.00000  | 0.00000  | 0.00000  |
| 185 | C10 | DYZ | -0.00561 | 0.00000  | 0.00000  | 0.00000  | 0.00000  |
| 186 | H16 | S   | 0.00000  | 0.25316  | -0.13287 | 0.15370  | 0.00266  |
| 187 | H16 | S   | 0.00000  | -0.32481 | 1.12618  | -1.15014 | -0.16444 |
| 188 | H16 | PX  | 0.00000  | 0.02252  | -0.06796 | 0.06196  | 0.00869  |
| 189 | H16 | PY  | 0.00000  | -0.01067 | 0.03120  | -0.02695 | -0.00740 |
| 190 | H16 | PZ  | -0.00925 | 0.00000  | 0.00000  | 0.00000  | 0.00000  |
| 191 | H18 | S   | 0.00000  | 0.01201  | 0.07663  | -0.12122 | -0.00549 |
| 192 | H18 | S   | 0.00000  | 0.25150  | -0.89571 | 1.09647  | 0.17847  |
| 193 | H18 | PX  | 0.00000  | -0.02242 | -0.04171 | 0.04027  | 0.00722  |
| 194 | H18 | PY  | 0.00000  | 0.02029  | -0.03224 | 0.05666  | 0.00444  |
| 195 | H18 | PZ  | -0.00128 | 0.00000  | 0.00000  | 0.00000  | 0.00000  |
| 196 | C9  | S   | 0.00000  | 0.00333  | 0.00963  | 0.01478  | 0.03405  |
| 197 | C9  | S   | 0.00000  | -0.02887 | 0.14752  | 0.27062  | 0.14285  |
| 198 | C9  | PX  | 0.00000  | 0.00873  | 0.05535  | 0.11913  | 0.28249  |
| 199 | C9  | PY  | 0.00000  | 0.04174  | -0.03653 | -0.07906 | -0.30126 |
| 200 | C9  | PZ  | -0.21984 | 0.00000  | 0.00000  | 0.00000  | 0.00000  |
| 201 | C9  | S   | 0.00000  | 0.00383  | -0.41942 | -0.71182 | -0.40406 |
| 202 | C9  | PX  | 0.00000  | 0.04803  | -0.07737 | -0.21799 | -0.75477 |
| 203 | C9  | PY  | 0.00000  | -0.08407 | -0.00970 | 0.05053  | 0.62353  |
| 204 | C9  | PZ  | 0.34077  | 0.00000  | 0.00000  | 0.00000  | 0.00000  |
| 205 | C9  | DXX | 0.00000  | 0.00842  | 0.00900  | 0.01505  | 0.00726  |
| 206 | C9  | DYY | 0.00000  | 0.00102  | 0.03709  | 0.05100  | 0.13463  |
| 207 | C9  | DZZ | 0.00000  | -0.00880 | -0.01012 | -0.01185 | -0.05328 |
| 208 | C9  | DXY | 0.00000  | 0.00105  | -0.01823 | -0.01545 | 0.02061  |
| 209 | C9  | DXZ | 0.07300  | 0.00000  | 0.00000  | 0.00000  | 0.00000  |
| 210 | C9  | DYZ | -0.03997 | 0.00000  | 0.00000  | 0.00000  | 0.00000  |
| 211 | H3  | S   | 0.00000  | 0.01570  | 0.14102  | 0.19946  | 0.40569  |
| 212 | H3  | S   | 0.00000  | 0.03447  | -0.02227 | -0.04524 | -0.71288 |
| 213 | H3  | PX  | 0.00000  | -0.00060 | -0.00655 | -0.00402 | 0.02257  |
| 214 | H3  | PY  | 0.00000  | -0.00291 | 0.01040  | 0.01852  | 0.08000  |
| 215 | H3  | PZ  | -0.02139 | 0.00000  | 0.00000  | 0.00000  | 0.00000  |
| 216 | H5  | S   | -0.19797 | -0.00566 | 0.00141  | -0.00477 | -0.03266 |
| 217 | H5  | S   | 0.36973  | -0.02492 | 0.11218  | 0.23761  | 0.56014  |
| 218 | H5  | PX  | -0.02508 | 0.00381  | 0.00374  | 0.00196  | -0.01597 |
| 219 | H5  | PY  | 0.00906  | -0.00353 | -0.01003 | -0.00827 | -0.00741 |
| 220 | H5  | PZ  | 0.02066  | 0.00100  | 0.01157  | 0.01812  | 0.01825  |

|     |    |    |          |          |          |          |          |
|-----|----|----|----------|----------|----------|----------|----------|
| 221 | H7 | S  | 0.19797  | -0.00566 | 0.00141  | -0.00477 | -0.03266 |
| 222 | H7 | S  | -0.36973 | -0.02492 | 0.11218  | 0.23761  | 0.56014  |
| 223 | H7 | PX | 0.02508  | 0.00381  | 0.00374  | 0.00196  | -0.01597 |
| 224 | H7 | PY | -0.00906 | -0.00353 | -0.01003 | -0.00827 | -0.00741 |
| 225 | H7 | PZ | 0.02066  | -0.00100 | -0.01157 | -0.01812 | -0.01825 |

|              |  |          |          |          |          |          |
|--------------|--|----------|----------|----------|----------|----------|
| MO:          |  | 96       | 97       | 98       | 99       | 100      |
| Eigenvalues: |  | 1.10661  | 1.10759  | 1.11104  | 1.12374  | 1.12979  |
| (ev):        |  | 30.11254 | 30.13895 | 30.23296 | 30.57848 | 30.74320 |

|    |    | A   | A        | A        | A        | A        |          |
|----|----|-----|----------|----------|----------|----------|----------|
| 1  | H1 | S   | 0.00000  | -0.12310 | 0.02617  | -0.08109 | 0.00000  |
| 2  | H1 | S   | 0.00000  | 0.48044  | -0.04944 | 1.10620  | 0.00000  |
| 3  | H1 | PX  | 0.00000  | -0.03682 | -0.00091 | -0.06812 | 0.00000  |
| 4  | H1 | PY  | 0.00000  | 0.01376  | 0.01604  | -0.02380 | 0.00000  |
| 5  | H1 | PZ  | -0.00294 | 0.00000  | 0.00000  | 0.00000  | 0.00691  |
| 6  | C1 | S   | 0.00000  | -0.00688 | -0.00136 | 0.00052  | 0.00000  |
| 7  | C1 | S   | 0.00000  | 0.18057  | -0.08169 | 0.83559  | 0.00000  |
| 8  | C1 | PX  | 0.00000  | 0.11062  | 0.01919  | 0.24713  | 0.00000  |
| 9  | C1 | PY  | 0.00000  | 0.09633  | -0.10158 | 0.32793  | 0.00000  |
| 10 | C1 | PZ  | 0.26121  | 0.00000  | 0.00000  | 0.00000  | -0.16921 |
| 11 | C1 | S   | 0.00000  | 0.14131  | -0.03635 | -0.76144 | 0.00000  |
| 12 | C1 | PX  | 0.00000  | -0.39458 | -0.04108 | -1.15092 | 0.00000  |
| 13 | C1 | PY  | 0.00000  | -0.36692 | 0.07331  | -0.88008 | 0.00000  |
| 14 | C1 | PZ  | -0.60198 | 0.00000  | 0.00000  | 0.00000  | 0.50524  |
| 15 | C1 | DXX | 0.00000  | -0.05470 | -0.00448 | 0.01079  | 0.00000  |
| 16 | C1 | DYY | 0.00000  | 0.07652  | -0.00759 | 0.07349  | 0.00000  |
| 17 | C1 | DZZ | 0.00000  | 0.00829  | 0.00496  | 0.04204  | 0.00000  |
| 18 | C1 | DXY | 0.00000  | -0.00110 | -0.00019 | -0.02287 | 0.00000  |
| 19 | C1 | DXZ | -0.02607 | 0.00000  | 0.00000  | 0.00000  | -0.00789 |
| 20 | C1 | DYZ | 0.01079  | 0.00000  | 0.00000  | 0.00000  | 0.00745  |
| 21 | C2 | S   | 0.00000  | -0.00367 | 0.00936  | -0.00087 | 0.00000  |
| 22 | C2 | S   | 0.00000  | 0.00427  | -0.23269 | -0.37780 | 0.00000  |
| 23 | C2 | PX  | 0.00000  | -0.23634 | 0.43430  | 0.27037  | 0.00000  |
| 24 | C2 | PY  | 0.00000  | 0.03148  | 0.22316  | 0.19806  | 0.00000  |
| 25 | C2 | PZ  | -0.08248 | 0.00000  | 0.00000  | 0.00000  | -0.03746 |
| 26 | C2 | S   | 0.00000  | 0.42342  | 0.21412  | 0.10231  | 0.00000  |
| 27 | C2 | PX  | 0.00000  | 1.45364  | -1.57363 | -0.41177 | 0.00000  |
| 28 | C2 | PY  | 0.00000  | -0.20443 | -0.31815 | -2.15579 | 0.00000  |
| 29 | C2 | PZ  | 0.19596  | 0.00000  | 0.00000  | 0.00000  | -0.23564 |
| 30 | C2 | DXX | 0.00000  | 0.03515  | 0.07615  | 0.07596  | 0.00000  |
| 31 | C2 | DYY | 0.00000  | 0.00039  | -0.05886 | -0.10486 | 0.00000  |
| 32 | C2 | DZZ | 0.00000  | -0.00907 | -0.04459 | -0.03773 | 0.00000  |
| 33 | C2 | DXY | 0.00000  | 0.01954  | 0.05636  | 0.01331  | 0.00000  |
| 34 | C2 | DXZ | -0.00378 | 0.00000  | 0.00000  | 0.00000  | 0.01890  |
| 35 | C2 | DYZ | 0.01694  | 0.00000  | 0.00000  | 0.00000  | 0.02131  |
| 36 | C3 | S   | 0.00000  | 0.01331  | -0.00525 | -0.00724 | 0.00000  |
| 37 | C3 | S   | 0.00000  | 0.26712  | 0.09902  | 0.01158  | 0.00000  |
| 38 | C3 | PX  | 0.00000  | 0.12081  | -0.04166 | 0.08093  | 0.00000  |
| 39 | C3 | PY  | 0.00000  | 0.14603  | -0.13078 | -0.07326 | 0.00000  |
| 40 | C3 | PZ  | -0.22691 | 0.00000  | 0.00000  | 0.00000  | 0.28134  |
| 41 | C3 | S   | 0.00000  | 0.20817  | -1.13588 | -1.73929 | 0.00000  |
| 42 | C3 | PX  | 0.00000  | -0.45432 | 0.09280  | -0.05805 | 0.00000  |
| 43 | C3 | PY  | 0.00000  | -1.10329 | 0.65167  | 0.54324  | 0.00000  |

|    |    |     |          |          |          |          |          |
|----|----|-----|----------|----------|----------|----------|----------|
| 44 | C3 | PZ  | 0.55827  | 0.00000  | 0.00000  | 0.00000  | -0.77311 |
| 45 | C3 | DXX | 0.00000  | 0.01882  | -0.02461 | -0.06886 | 0.00000  |
| 46 | C3 | DYY | 0.00000  | 0.05903  | -0.01857 | -0.01261 | 0.00000  |
| 47 | C3 | DZZ | 0.00000  | -0.00896 | 0.01873  | 0.02304  | 0.00000  |
| 48 | C3 | DXY | 0.00000  | 0.00980  | 0.03922  | 0.00555  | 0.00000  |
| 49 | C3 | DXZ | -0.01640 | 0.00000  | 0.00000  | 0.00000  | -0.02958 |
| 50 | C3 | DYZ | 0.00395  | 0.00000  | 0.00000  | 0.00000  | 0.00369  |
| 51 | C4 | S   | 0.00000  | -0.00434 | 0.00518  | 0.00888  | 0.00000  |
| 52 | C4 | S   | 0.00000  | -0.28591 | -0.26529 | -0.13134 | 0.00000  |
| 53 | C4 | PX  | 0.00000  | -0.09314 | 0.05617  | -0.02509 | 0.00000  |
| 54 | C4 | PY  | 0.00000  | -0.03449 | -0.13379 | -0.06985 | 0.00000  |
| 55 | C4 | PZ  | -0.03548 | 0.00000  | 0.00000  | 0.00000  | 0.09916  |
| 56 | C4 | S   | 0.00000  | 1.20742  | 0.77795  | 1.62247  | 0.00000  |
| 57 | C4 | PX  | 0.00000  | -0.33350 | -0.25338 | -0.87793 | 0.00000  |
| 58 | C4 | PY  | 0.00000  | -0.23271 | 0.19370  | 1.93784  | 0.00000  |
| 59 | C4 | PZ  | 0.24800  | 0.00000  | 0.00000  | 0.00000  | -0.29024 |
| 60 | C4 | DXX | 0.00000  | -0.00468 | -0.03120 | 0.05925  | 0.00000  |
| 61 | C4 | DYY | 0.00000  | -0.01145 | 0.06622  | 0.04234  | 0.00000  |
| 62 | C4 | DZZ | 0.00000  | -0.01424 | -0.01968 | -0.05136 | 0.00000  |
| 63 | C4 | DXY | 0.00000  | 0.02392  | 0.04915  | -0.02492 | 0.00000  |
| 64 | C4 | DXZ | 0.01505  | 0.00000  | 0.00000  | 0.00000  | 0.00082  |
| 65 | C4 | DYZ | -0.04071 | 0.00000  | 0.00000  | 0.00000  | 0.00493  |
| 66 | C5 | S   | 0.00000  | 0.01821  | 0.02677  | 0.01295  | 0.00000  |
| 67 | C5 | S   | 0.00000  | -0.44611 | -0.09187 | 0.36228  | 0.00000  |
| 68 | C5 | PX  | 0.00000  | 0.41630  | 0.30704  | -0.03581 | 0.00000  |
| 69 | C5 | PY  | 0.00000  | -0.33856 | -0.09491 | 0.35723  | 0.00000  |
| 70 | C5 | PZ  | 0.05867  | 0.00000  | 0.00000  | 0.00000  | 0.01515  |
| 71 | C5 | S   | 0.00000  | 0.41183  | 0.33283  | 0.06862  | 0.00000  |
| 72 | C5 | PX  | 0.00000  | -1.85431 | -0.51560 | -0.61322 | 0.00000  |
| 73 | C5 | PY  | 0.00000  | 0.94078  | 0.12176  | -2.55360 | 0.00000  |
| 74 | C5 | PZ  | -0.20466 | 0.00000  | 0.00000  | 0.00000  | 0.09982  |
| 75 | C5 | DXX | 0.00000  | 0.01083  | 0.01935  | 0.01205  | 0.00000  |
| 76 | C5 | DYY | 0.00000  | -0.01670 | 0.07655  | 0.06477  | 0.00000  |
| 77 | C5 | DZZ | 0.00000  | -0.04878 | -0.06202 | 0.00834  | 0.00000  |
| 78 | C5 | DXY | 0.00000  | -0.09138 | -0.12005 | 0.01054  | 0.00000  |
| 79 | C5 | DXZ | 0.01055  | 0.00000  | 0.00000  | 0.00000  | 0.01517  |
| 80 | C5 | DYZ | -0.00657 | 0.00000  | 0.00000  | 0.00000  | -0.01928 |
| 81 | C6 | S   | 0.00000  | -0.00580 | -0.00824 | -0.00384 | 0.00000  |
| 82 | C6 | S   | 0.00000  | 0.06274  | -0.07998 | -0.03556 | 0.00000  |
| 83 | C6 | PX  | 0.00000  | 0.01521  | -0.02924 | -0.26281 | 0.00000  |
| 84 | C6 | PY  | 0.00000  | 0.13068  | -0.05521 | -0.19904 | 0.00000  |
| 85 | C6 | PZ  | 0.00165  | 0.00000  | 0.00000  | 0.00000  | -0.34314 |
| 86 | C6 | S   | 0.00000  | -1.33537 | 0.62073  | 0.02159  | 0.00000  |
| 87 | C6 | PX  | 0.00000  | 0.08634  | 0.10393  | 1.92689  | 0.00000  |
| 88 | C6 | PY  | 0.00000  | -0.28912 | 1.05211  | -0.30993 | 0.00000  |
| 89 | C6 | PZ  | -0.05813 | 0.00000  | 0.00000  | 0.00000  | 1.08485  |
| 90 | C6 | DXX | 0.00000  | -0.03009 | 0.01508  | -0.04735 | 0.00000  |
| 91 | C6 | DYY | 0.00000  | -0.00611 | -0.01441 | 0.02500  | 0.00000  |
| 92 | C6 | DZZ | 0.00000  | 0.01325  | -0.00704 | 0.00962  | 0.00000  |
| 93 | C6 | DXY | 0.00000  | 0.02705  | -0.03213 | 0.00798  | 0.00000  |
| 94 | C6 | DXZ | 0.02269  | 0.00000  | 0.00000  | 0.00000  | 0.02420  |
| 95 | C6 | DYZ | -0.03587 | 0.00000  | 0.00000  | 0.00000  | -0.06000 |
| 96 | C7 | S   | 0.00000  | 0.00596  | -0.00362 | 0.01124  | 0.00000  |
| 97 | C7 | S   | 0.00000  | -0.17344 | 0.07891  | -0.29183 | 0.00000  |



|     |    |     |          |          |          |          |          |
|-----|----|-----|----------|----------|----------|----------|----------|
| 98  | C7 | PX  | 0.00000  | -0.50565 | 0.20985  | -0.23492 | 0.00000  |
| 99  | C7 | PY  | 0.00000  | -0.11700 | -0.08792 | -0.00217 | 0.00000  |
| 100 | C7 | PZ  | 0.02435  | 0.00000  | 0.00000  | 0.00000  | 0.04102  |
| 101 | C7 | S   | 0.00000  | -1.00091 | 0.62783  | 1.19777  | 0.00000  |
| 102 | C7 | PX  | 0.00000  | 2.39636  | -1.03053 | 0.48004  | 0.00000  |
| 103 | C7 | PY  | 0.00000  | 0.48318  | 0.34285  | 0.44170  | 0.00000  |
| 104 | C7 | PZ  | -0.23068 | 0.00000  | 0.00000  | 0.00000  | -0.02069 |
| 105 | C7 | DXX | 0.00000  | 0.02130  | -0.01657 | 0.05903  | 0.00000  |
| 106 | C7 | DYY | 0.00000  | -0.08268 | 0.05736  | -0.03969 | 0.00000  |
| 107 | C7 | DZZ | 0.00000  | -0.00001 | -0.00380 | -0.03997 | 0.00000  |
| 108 | C7 | DXY | 0.00000  | -0.04523 | -0.01474 | -0.03086 | 0.00000  |
| 109 | C7 | DXZ | -0.00879 | 0.00000  | 0.00000  | 0.00000  | -0.01799 |
| 110 | C7 | DYZ | -0.01491 | 0.00000  | 0.00000  | 0.00000  | -0.04032 |
| 111 | O1 | S   | 0.00000  | 0.00064  | 0.00010  | 0.01148  | 0.00000  |
| 112 | O1 | S   | 0.00000  | 0.02287  | -0.15680 | -0.05236 | 0.00000  |
| 113 | O1 | PX  | 0.00000  | -0.03241 | 0.00498  | 0.02490  | 0.00000  |
| 114 | O1 | PY  | 0.00000  | -0.03556 | -0.24423 | -0.12963 | 0.00000  |
| 115 | O1 | PZ  | -0.09121 | 0.00000  | 0.00000  | 0.00000  | 0.13667  |
| 116 | O1 | S   | 0.00000  | -0.10509 | 0.06502  | -0.91737 | 0.00000  |
| 117 | O1 | PX  | 0.00000  | 0.10794  | -0.02441 | 0.14578  | 0.00000  |
| 118 | O1 | PY  | 0.00000  | 0.03113  | 0.38263  | 0.73669  | 0.00000  |
| 119 | O1 | PZ  | 0.13415  | 0.00000  | 0.00000  | 0.00000  | -0.14026 |
| 120 | O1 | DXX | 0.00000  | 0.00473  | -0.07386 | -0.03915 | 0.00000  |
| 121 | O1 | DYY | 0.00000  | -0.01534 | -0.08508 | -0.08923 | 0.00000  |
| 122 | O1 | DZZ | 0.00000  | 0.03261  | -0.01705 | 0.03496  | 0.00000  |
| 123 | O1 | DXY | 0.00000  | 0.02911  | 0.01296  | 0.00575  | 0.00000  |
| 124 | O1 | DXZ | 0.08596  | 0.00000  | 0.00000  | 0.00000  | -0.02087 |
| 125 | O1 | DYZ | 0.04799  | 0.00000  | 0.00000  | 0.00000  | -0.01454 |
| 126 | H4 | S   | 0.00000  | 0.29226  | 0.31306  | -0.01356 | 0.00000  |
| 127 | H4 | S   | 0.00000  | -1.56954 | -0.79139 | 0.88323  | 0.00000  |
| 128 | H4 | PX  | 0.00000  | -0.07144 | -0.03879 | 0.01422  | 0.00000  |
| 129 | H4 | PY  | 0.00000  | 0.06728  | 0.04574  | -0.04316 | 0.00000  |
| 130 | H4 | PZ  | -0.00797 | 0.00000  | 0.00000  | 0.00000  | -0.00452 |
| 131 | N1 | S   | 0.00000  | -0.00885 | -0.00187 | 0.01754  | 0.00000  |
| 132 | N1 | S   | 0.00000  | -0.04551 | -0.06977 | 0.05095  | 0.00000  |
| 133 | N1 | PX  | 0.00000  | 0.00077  | 0.20621  | -0.01683 | 0.00000  |
| 134 | N1 | PY  | 0.00000  | 0.03069  | -0.08081 | 0.04653  | 0.00000  |
| 135 | N1 | PZ  | 0.39910  | 0.00000  | 0.00000  | 0.00000  | 0.85409  |
| 136 | N1 | S   | 0.00000  | 0.22344  | 0.32528  | -0.06610 | 0.00000  |
| 137 | N1 | PX  | 0.00000  | -0.05061 | -0.37009 | -0.20380 | 0.00000  |
| 138 | N1 | PY  | 0.00000  | 0.09484  | 0.39755  | -0.37490 | 0.00000  |
| 139 | N1 | PZ  | -0.53171 | 0.00000  | 0.00000  | 0.00000  | -1.41006 |
| 140 | N1 | DXX | 0.00000  | -0.03827 | -0.03035 | 0.03460  | 0.00000  |
| 141 | N1 | DYY | 0.00000  | -0.00471 | -0.01251 | 0.05812  | 0.00000  |
| 142 | N1 | DZZ | 0.00000  | 0.00841  | -0.01260 | -0.02607 | 0.00000  |
| 143 | N1 | DXY | 0.00000  | -0.03253 | 0.00618  | -0.03514 | 0.00000  |
| 144 | N1 | DXZ | 0.03315  | 0.00000  | 0.00000  | 0.00000  | 0.03053  |
| 145 | N1 | DYZ | 0.01458  | 0.00000  | 0.00000  | 0.00000  | 0.02780  |
| 146 | H6 | S   | 0.00000  | 0.04588  | 0.17155  | 0.29442  | 0.00000  |
| 147 | H6 | S   | 0.00000  | 0.59361  | -1.31207 | -1.01172 | 0.00000  |
| 148 | H6 | PX  | 0.00000  | 0.01904  | -0.07703 | -0.06533 | 0.00000  |
| 149 | H6 | PY  | 0.00000  | 0.01743  | 0.00001  | -0.02046 | 0.00000  |
| 150 | H6 | PZ  | 0.00492  | 0.00000  | 0.00000  | 0.00000  | -0.01641 |
| 151 | C8 | S   | 0.00000  | -0.00703 | 0.00239  | 0.00318  | 0.00000  |

|     |     |     |          |          |          |          |          |
|-----|-----|-----|----------|----------|----------|----------|----------|
| 152 | C8  | S   | 0.00000  | -0.31267 | -0.06004 | 0.17059  | 0.00000  |
| 153 | C8  | PX  | 0.00000  | -0.14901 | 0.10459  | -0.12418 | 0.00000  |
| 154 | C8  | PY  | 0.00000  | -0.23060 | 0.01525  | 0.02715  | 0.00000  |
| 155 | C8  | PZ  | -0.04838 | 0.00000  | 0.00000  | 0.00000  | -0.16153 |
| 156 | C8  | S   | 0.00000  | 1.43045  | 0.05383  | -0.08289 | 0.00000  |
| 157 | C8  | PX  | 0.00000  | 0.91244  | -0.65861 | 0.46430  | 0.00000  |
| 158 | C8  | PY  | 0.00000  | 1.40360  | -0.17447 | -0.24691 | 0.00000  |
| 159 | C8  | PZ  | 0.23707  | 0.00000  | 0.00000  | 0.00000  | 0.59227  |
| 160 | C8  | DXX | 0.00000  | -0.00516 | 0.04171  | 0.00441  | 0.00000  |
| 161 | C8  | DYY | 0.00000  | -0.02207 | -0.02293 | 0.02499  | 0.00000  |
| 162 | C8  | DZZ | 0.00000  | -0.01093 | -0.01018 | 0.00246  | 0.00000  |
| 163 | C8  | DXY | 0.00000  | 0.00975  | -0.00426 | 0.00654  | 0.00000  |
| 164 | C8  | DXZ | -0.01329 | 0.00000  | 0.00000  | 0.00000  | 0.01639  |
| 165 | C8  | DYZ | 0.02923  | 0.00000  | 0.00000  | 0.00000  | 0.04491  |
| 166 | H8  | S   | 0.00000  | 0.09932  | -0.05044 | 0.17192  | 0.00000  |
| 167 | H8  | S   | 0.00000  | -1.41085 | 0.61681  | -0.75540 | 0.00000  |
| 168 | H8  | PX  | 0.00000  | 0.06508  | -0.02869 | 0.04991  | 0.00000  |
| 169 | H8  | PY  | 0.00000  | -0.01281 | 0.01306  | 0.00240  | 0.00000  |
| 170 | H8  | PZ  | -0.01101 | 0.00000  | 0.00000  | 0.00000  | -0.00538 |
| 171 | C10 | S   | 0.00000  | 0.01145  | -0.00736 | 0.00385  | 0.00000  |
| 172 | C10 | S   | 0.00000  | -0.16354 | 0.00065  | -0.06058 | 0.00000  |
| 173 | C10 | PX  | 0.00000  | 0.49806  | -0.30519 | -0.00499 | 0.00000  |
| 174 | C10 | PY  | 0.00000  | 0.10267  | -0.10071 | -0.04762 | 0.00000  |
| 175 | C10 | PZ  | -0.04429 | 0.00000  | 0.00000  | 0.00000  | -0.04432 |
| 176 | C10 | S   | 0.00000  | 0.67639  | -0.05208 | -0.11576 | 0.00000  |
| 177 | C10 | PX  | 0.00000  | -1.61045 | 0.96337  | -0.03210 | 0.00000  |
| 178 | C10 | PY  | 0.00000  | -0.16464 | 0.33807  | -0.08762 | 0.00000  |
| 179 | C10 | PZ  | 0.00923  | 0.00000  | 0.00000  | 0.00000  | -0.08386 |
| 180 | C10 | DXX | 0.00000  | -0.01163 | -0.00840 | -0.00096 | 0.00000  |
| 181 | C10 | DYY | 0.00000  | 0.03615  | -0.01842 | 0.00186  | 0.00000  |
| 182 | C10 | DZZ | 0.00000  | -0.02662 | 0.01607  | -0.01443 | 0.00000  |
| 183 | C10 | DXY | 0.00000  | 0.07423  | -0.03469 | 0.01821  | 0.00000  |
| 184 | C10 | DXZ | 0.01172  | 0.00000  | 0.00000  | 0.00000  | 0.04713  |
| 185 | C10 | DYZ | -0.00757 | 0.00000  | 0.00000  | 0.00000  | 0.00100  |
| 186 | H16 | S   | 0.00000  | -0.05860 | 0.02185  | -0.04270 | 0.00000  |
| 187 | H16 | S   | 0.00000  | 0.86784  | -0.46282 | 0.03970  | 0.00000  |
| 188 | H16 | PX  | 0.00000  | -0.04096 | 0.02717  | 0.00137  | 0.00000  |
| 189 | H16 | PY  | 0.00000  | 0.02645  | -0.01580 | 0.00538  | 0.00000  |
| 190 | H16 | PZ  | 0.00337  | 0.00000  | 0.00000  | 0.00000  | 0.00890  |
| 191 | H18 | S   | 0.00000  | 0.22636  | -0.08757 | 0.06514  | 0.00000  |
| 192 | H18 | S   | 0.00000  | -1.05406 | 0.65494  | -0.11473 | 0.00000  |
| 193 | H18 | PX  | 0.00000  | -0.04747 | 0.02954  | 0.00289  | 0.00000  |
| 194 | H18 | PY  | 0.00000  | -0.05997 | 0.03145  | -0.00793 | 0.00000  |
| 195 | H18 | PZ  | -0.00145 | 0.00000  | 0.00000  | 0.00000  | -0.01404 |
| 196 | C9  | S   | 0.00000  | -0.01379 | -0.03222 | 0.00169  | 0.00000  |
| 197 | C9  | S   | 0.00000  | 0.14500  | -0.11783 | 0.00645  | 0.00000  |
| 198 | C9  | PX  | 0.00000  | 0.03967  | -0.24027 | -0.01292 | 0.00000  |
| 199 | C9  | PY  | 0.00000  | 0.07162  | 0.36112  | 0.01730  | 0.00000  |
| 200 | C9  | PZ  | 0.65349  | 0.00000  | 0.00000  | 0.00000  | -0.23725 |
| 201 | C9  | S   | 0.00000  | -0.25677 | 0.41047  | -0.25680 | 0.00000  |
| 202 | C9  | PX  | 0.00000  | -0.03070 | 0.57413  | 0.30956  | 0.00000  |
| 203 | C9  | PY  | 0.00000  | -0.08792 | -0.60743 | -0.29425 | 0.00000  |
| 204 | C9  | PZ  | -1.24135 | 0.00000  | 0.00000  | 0.00000  | 0.51949  |
| 205 | C9  | DXX | 0.00000  | 0.00856  | 0.00673  | -0.00343 | 0.00000  |

|     |    |     |          |          |          |          |          |
|-----|----|-----|----------|----------|----------|----------|----------|
| 206 | C9 | DYY | 0.00000  | -0.05052 | -0.16258 | 0.03810  | 0.00000  |
| 207 | C9 | DZZ | 0.00000  | 0.02434  | 0.07880  | -0.04540 | 0.00000  |
| 208 | C9 | DXY | 0.00000  | 0.01610  | 0.01285  | -0.03949 | 0.00000  |
| 209 | C9 | DXZ | -0.22602 | 0.00000  | 0.00000  | 0.00000  | 0.07476  |
| 210 | C9 | DYZ | 0.08996  | 0.00000  | 0.00000  | 0.00000  | -0.02756 |
| 211 | H3 | S   | 0.00000  | -0.19684 | -0.54593 | 0.24388  | 0.00000  |
| 212 | H3 | S   | 0.00000  | 0.29124  | 0.83694  | 0.02800  | 0.00000  |
| 213 | H3 | PX  | 0.00000  | 0.00589  | -0.00605 | -0.01923 | 0.00000  |
| 214 | H3 | PY  | 0.00000  | -0.02620 | -0.08865 | 0.00281  | 0.00000  |
| 215 | H3 | PZ  | 0.04292  | 0.00000  | 0.00000  | 0.00000  | -0.01032 |
| 216 | H5 | S   | 0.56050  | -0.02906 | 0.05695  | -0.06884 | -0.18971 |
| 217 | H5 | S   | -1.31884 | 0.01506  | -0.53167 | -0.02543 | 0.50794  |
| 218 | H5 | PX  | 0.07106  | -0.00516 | 0.00812  | 0.01675  | -0.02734 |
| 219 | H5 | PY  | -0.03182 | 0.01417  | 0.01972  | -0.02320 | 0.00940  |
| 220 | H5 | PZ  | -0.05455 | 0.00487  | -0.02594 | 0.01866  | 0.01875  |
| 221 | H7 | S   | -0.56050 | -0.02906 | 0.05695  | -0.06884 | 0.18971  |
| 222 | H7 | S   | 1.31884  | 0.01506  | -0.53167 | -0.02543 | -0.50794 |
| 223 | H7 | PX  | -0.07106 | -0.00516 | 0.00812  | 0.01675  | 0.02734  |
| 224 | H7 | PY  | 0.03182  | 0.01417  | 0.01972  | -0.02320 | -0.00940 |
| 225 | H7 | PZ  | -0.05455 | -0.00487 | 0.02594  | -0.01866 | 0.01875  |

|              |          |          |          |          |          |
|--------------|----------|----------|----------|----------|----------|
| MO:          | 101      | 102      | 103      | 104      | 105      |
| Eigenvalues: | 1.14664  | 1.16819  | 1.17462  | 1.17763  | 1.18515  |
| (ev):        | 31.20181 | 31.78807 | 31.96313 | 32.04497 | 32.24946 |

|    |    |     |          |          |          |          |          |
|----|----|-----|----------|----------|----------|----------|----------|
|    |    | A   | A        | A        | A        | A        |          |
| 1  | H1 | S   | -0.20003 | -0.10678 | -0.07597 | -0.03766 | 0.20388  |
| 2  | H1 | S   | 0.71477  | 0.08673  | -0.04791 | -0.20105 | -0.76487 |
| 3  | H1 | PX  | -0.06381 | -0.00576 | -0.01092 | 0.00718  | 0.03012  |
| 4  | H1 | PY  | 0.00834  | -0.01348 | -0.00066 | -0.00058 | 0.01067  |
| 5  | H1 | PZ  | 0.00000  | 0.00000  | 0.00000  | 0.00000  | 0.00000  |
| 6  | C1 | S   | -0.00517 | -0.00421 | 0.00882  | 0.00360  | 0.00527  |
| 7  | C1 | S   | 0.23802  | -0.16266 | -0.11574 | -0.02955 | 0.17839  |
| 8  | C1 | PX  | 0.31079  | 0.13350  | 0.09571  | -0.09085 | -0.10577 |
| 9  | C1 | PY  | -0.02818 | -0.13247 | 0.06422  | 0.09048  | -0.26580 |
| 10 | C1 | PZ  | 0.00000  | 0.00000  | 0.00000  | 0.00000  | 0.00000  |
| 11 | C1 | S   | -1.97572 | 0.36233  | 0.24354  | 0.23597  | 0.66077  |
| 12 | C1 | PX  | -0.50863 | -0.40600 | 0.15311  | 0.38846  | 0.13263  |
| 13 | C1 | PY  | -0.07102 | 0.49643  | -0.17097 | -0.42434 | 1.72866  |
| 14 | C1 | PZ  | 0.00000  | 0.00000  | 0.00000  | 0.00000  | 0.00000  |
| 15 | C1 | DXX | -0.03522 | -0.00371 | -0.04389 | -0.01244 | 0.10264  |
| 16 | C1 | DYY | 0.02461  | -0.03018 | 0.02760  | 0.01572  | -0.01403 |
| 17 | C1 | DZZ | 0.02002  | -0.00103 | 0.00462  | -0.00710 | -0.03640 |
| 18 | C1 | DXY | -0.00780 | -0.05125 | -0.00122 | 0.01815  | -0.03325 |
| 19 | C1 | DXZ | 0.00000  | 0.00000  | 0.00000  | 0.00000  | 0.00000  |
| 20 | C1 | DYZ | 0.00000  | 0.00000  | 0.00000  | 0.00000  | 0.00000  |
| 21 | C2 | S   | 0.01003  | -0.01340 | -0.00048 | 0.00017  | 0.00660  |
| 22 | C2 | S   | -0.40351 | -0.43948 | 0.13696  | -0.03262 | 0.24628  |
| 23 | C2 | PX  | 0.24318  | 0.06706  | 0.13840  | 0.05281  | -0.25618 |
| 24 | C2 | PY  | -0.41579 | 0.10610  | 0.05520  | -0.04797 | 0.05644  |
| 25 | C2 | PZ  | 0.00000  | 0.00000  | 0.00000  | 0.00000  | 0.00000  |
| 26 | C2 | S   | 2.13108  | 1.41619  | -0.26466 | -0.03010 | -1.12690 |
| 27 | C2 | PX  | -1.17262 | -0.32245 | -0.53244 | 0.07503  | 0.77765  |
| 28 | C2 | PY  | 2.69939  | -0.38033 | 0.43029  | 0.11130  | -0.72908 |

|    |    |     |          |          |          |          |          |
|----|----|-----|----------|----------|----------|----------|----------|
| 29 | C2 | PZ  | 0.00000  | 0.00000  | 0.00000  | 0.00000  | 0.00000  |
| 30 | C2 | DXX | -0.04808 | -0.05834 | 0.02595  | 0.00361  | 0.02626  |
| 31 | C2 | DYY | 0.04337  | -0.00939 | -0.01056 | -0.00443 | -0.00198 |
| 32 | C2 | DZZ | -0.03181 | -0.00858 | 0.00633  | 0.00256  | 0.00992  |
| 33 | C2 | DXY | 0.03384  | -0.01454 | -0.00637 | 0.02619  | -0.02312 |
| 34 | C2 | DXZ | 0.00000  | 0.00000  | 0.00000  | 0.00000  | 0.00000  |
| 35 | C2 | DYZ | 0.00000  | 0.00000  | 0.00000  | 0.00000  | 0.00000  |
| 36 | C3 | S   | 0.00746  | -0.00663 | 0.00896  | 0.00932  | -0.01646 |
| 37 | C3 | S   | 0.33260  | -0.49182 | 0.38194  | 0.11574  | -0.14504 |
| 38 | C3 | PX  | -0.05598 | -0.23292 | 0.00089  | -0.07874 | 0.14432  |
| 39 | C3 | PY  | -0.11090 | 0.09772  | 0.12692  | 0.14647  | -0.30911 |
| 40 | C3 | PZ  | 0.00000  | 0.00000  | 0.00000  | 0.00000  | 0.00000  |
| 41 | C3 | S   | -0.00417 | 1.91913  | -0.95726 | -0.16243 | 0.37743  |
| 42 | C3 | PX  | 0.08389  | 1.22261  | -0.37803 | 0.00190  | -0.42078 |
| 43 | C3 | PY  | 0.38254  | -0.72858 | 0.05381  | -0.44663 | 1.15124  |
| 44 | C3 | PZ  | 0.00000  | 0.00000  | 0.00000  | 0.00000  | 0.00000  |
| 45 | C3 | DXX | 0.03359  | 0.00696  | 0.04153  | 0.00810  | -0.06133 |
| 46 | C3 | DYY | 0.03777  | -0.01560 | 0.02091  | 0.02493  | -0.00837 |
| 47 | C3 | DZZ | -0.01213 | -0.02157 | 0.00487  | -0.00730 | 0.01960  |
| 48 | C3 | DXY | 0.04566  | -0.03620 | 0.00872  | -0.03989 | 0.08011  |
| 49 | C3 | DXZ | 0.00000  | 0.00000  | 0.00000  | 0.00000  | 0.00000  |
| 50 | C3 | DYZ | 0.00000  | 0.00000  | 0.00000  | 0.00000  | 0.00000  |
| 51 | C4 | S   | 0.01340  | 0.00639  | -0.02221 | -0.00987 | 0.01364  |
| 52 | C4 | S   | 0.55998  | 0.43003  | -0.37387 | -0.16071 | 0.33612  |
| 53 | C4 | PX  | -0.36640 | 0.06716  | 0.08937  | -0.04315 | 0.28486  |
| 54 | C4 | PY  | 0.10435  | -0.08804 | -0.04799 | -0.08676 | 0.13624  |
| 55 | C4 | PZ  | 0.00000  | 0.00000  | 0.00000  | 0.00000  | 0.00000  |
| 56 | C4 | S   | -3.31086 | -1.67128 | 0.63601  | 0.85785  | -0.60503 |
| 57 | C4 | PX  | 2.86900  | 0.06246  | -0.27039 | -0.02735 | -2.05858 |
| 58 | C4 | PY  | -0.99787 | -0.39285 | -0.03118 | 0.09385  | 0.11786  |
| 59 | C4 | PZ  | 0.00000  | 0.00000  | 0.00000  | 0.00000  | 0.00000  |
| 60 | C4 | DXX | -0.03837 | 0.00701  | -0.03389 | 0.00735  | -0.00176 |
| 61 | C4 | DYY | 0.04362  | 0.03497  | -0.10707 | -0.03353 | 0.07447  |
| 62 | C4 | DZZ | 0.02924  | 0.00960  | 0.03048  | -0.00013 | -0.01699 |
| 63 | C4 | DXY | 0.01620  | 0.04213  | -0.05009 | -0.03124 | 0.02666  |
| 64 | C4 | DXZ | 0.00000  | 0.00000  | 0.00000  | 0.00000  | 0.00000  |
| 65 | C4 | DYZ | 0.00000  | 0.00000  | 0.00000  | 0.00000  | 0.00000  |
| 66 | C5 | S   | -0.02245 | -0.00303 | 0.00132  | 0.00040  | 0.00022  |
| 67 | C5 | S   | -0.08779 | -0.01442 | 0.26844  | 0.12159  | -0.16350 |
| 68 | C5 | PX  | -0.53361 | -0.00820 | -0.24957 | -0.04508 | 0.16941  |
| 69 | C5 | PY  | -0.25572 | -0.09504 | 0.31706  | -0.01248 | 0.04165  |
| 70 | C5 | PZ  | 0.00000  | 0.00000  | 0.00000  | 0.00000  | 0.00000  |
| 71 | C5 | S   | 0.12638  | 0.34511  | -1.28885 | -0.47871 | 0.03664  |
| 72 | C5 | PX  | 3.12324  | 0.24173  | 0.87239  | -0.04849 | -1.29526 |
| 73 | C5 | PY  | 2.38858  | 0.63313  | -0.74333 | -0.17157 | -0.72941 |
| 74 | C5 | PZ  | 0.00000  | 0.00000  | 0.00000  | 0.00000  | 0.00000  |
| 75 | C5 | DXX | 0.07795  | 0.02342  | -0.04619 | -0.00166 | -0.02823 |
| 76 | C5 | DYY | -0.11619 | -0.01614 | 0.01927  | -0.00204 | 0.01967  |
| 77 | C5 | DZZ | 0.01540  | 0.00121  | 0.04160  | 0.01353  | -0.01723 |
| 78 | C5 | DXY | 0.00191  | 0.01464  | 0.03390  | -0.00040 | -0.01996 |
| 79 | C5 | DXZ | 0.00000  | 0.00000  | 0.00000  | 0.00000  | 0.00000  |
| 80 | C5 | DYZ | 0.00000  | 0.00000  | 0.00000  | 0.00000  | 0.00000  |
| 81 | C6 | S   | 0.01434  | 0.00688  | 0.00259  | -0.00850 | 0.00502  |
| 82 | C6 | S   | -0.19986 | 0.18584  | 0.03687  | -0.37448 | 0.13800  |

|     |    |     |          |          |          |          |          |
|-----|----|-----|----------|----------|----------|----------|----------|
| 83  | C6 | PX  | 0.13007  | -0.00079 | 0.02739  | -0.00194 | -0.09570 |
| 84  | C6 | PY  | 0.05052  | 0.04822  | -0.02766 | 0.07218  | -0.03917 |
| 85  | C6 | PZ  | 0.00000  | 0.00000  | 0.00000  | 0.00000  | 0.00000  |
| 86  | C6 | S   | 2.44592  | -0.83770 | 0.79772  | 0.75735  | -1.19029 |
| 87  | C6 | PX  | -1.16233 | 0.39477  | -0.46039 | -0.04088 | 0.32666  |
| 88  | C6 | PY  | -0.76368 | 0.65884  | -0.56410 | -0.29969 | 0.26450  |
| 89  | C6 | PZ  | 0.00000  | 0.00000  | 0.00000  | 0.00000  | 0.00000  |
| 90  | C6 | DXX | 0.04021  | 0.01217  | 0.01778  | -0.04381 | 0.00422  |
| 91  | C6 | DYY | 0.04488  | 0.02006  | 0.02550  | -0.01239 | -0.04127 |
| 92  | C6 | DZZ | -0.04330 | -0.00252 | -0.00851 | 0.00041  | 0.01380  |
| 93  | C6 | DXY | -0.01902 | 0.03373  | -0.00708 | 0.03095  | -0.02493 |
| 94  | C6 | DXZ | 0.00000  | 0.00000  | 0.00000  | 0.00000  | 0.00000  |
| 95  | C6 | DYZ | 0.00000  | 0.00000  | 0.00000  | 0.00000  | 0.00000  |
| 96  | C7 | S   | 0.00940  | -0.01745 | -0.00404 | 0.00425  | 0.01578  |
| 97  | C7 | S   | 0.22431  | -0.62707 | 0.20511  | 0.20731  | -0.03401 |
| 98  | C7 | PX  | -0.04728 | -0.15428 | 0.05009  | -0.12853 | 0.09941  |
| 99  | C7 | PY  | -0.22602 | 0.44943  | -0.07338 | 0.08027  | -0.44542 |
| 100 | C7 | PZ  | 0.00000  | 0.00000  | 0.00000  | 0.00000  | 0.00000  |
| 101 | C7 | S   | -1.21570 | 1.28348  | -0.28850 | -0.45449 | -0.13912 |
| 102 | C7 | PX  | 0.63799  | 0.22417  | -0.26508 | 0.59969  | -0.14113 |
| 103 | C7 | PY  | 0.87035  | -2.26304 | 0.65825  | -0.13855 | 1.46064  |
| 104 | C7 | PZ  | 0.00000  | 0.00000  | 0.00000  | 0.00000  | 0.00000  |
| 105 | C7 | DXX | 0.00498  | -0.00213 | -0.00180 | 0.03879  | -0.01930 |
| 106 | C7 | DYY | 0.01714  | -0.09689 | 0.01458  | -0.00935 | 0.03687  |
| 107 | C7 | DZZ | 0.00124  | -0.00603 | 0.00961  | -0.00068 | -0.00515 |
| 108 | C7 | DXY | -0.04715 | 0.09715  | -0.01574 | 0.02069  | -0.06391 |
| 109 | C7 | DXZ | 0.00000  | 0.00000  | 0.00000  | 0.00000  | 0.00000  |
| 110 | C7 | DYZ | 0.00000  | 0.00000  | 0.00000  | 0.00000  | 0.00000  |
| 111 | O1 | S   | -0.00805 | -0.01061 | -0.00213 | 0.00012  | 0.00301  |
| 112 | O1 | S   | -0.16892 | -0.17014 | 0.27850  | 0.08461  | -0.19641 |
| 113 | O1 | PX  | 0.20919  | 0.04696  | -0.22833 | -0.07138 | 0.02161  |
| 114 | O1 | PY  | -0.11630 | -0.11409 | 0.11984  | 0.05714  | -0.04909 |
| 115 | O1 | PZ  | 0.00000  | 0.00000  | 0.00000  | 0.00000  | 0.00000  |
| 116 | O1 | S   | 0.98819  | 0.80080  | -0.25642 | -0.20035 | 0.41087  |
| 117 | O1 | PX  | -0.58907 | -0.10741 | 0.39592  | 0.14497  | 0.20031  |
| 118 | O1 | PY  | -0.24601 | -0.09421 | -0.20476 | -0.01953 | 0.18589  |
| 119 | O1 | PZ  | 0.00000  | 0.00000  | 0.00000  | 0.00000  | 0.00000  |
| 120 | O1 | DXX | -0.05067 | -0.04089 | 0.10763  | 0.03338  | -0.06025 |
| 121 | O1 | DYY | 0.00201  | -0.03771 | 0.08308  | 0.00317  | -0.02923 |
| 122 | O1 | DZZ | -0.12072 | -0.10013 | 0.08868  | 0.04461  | -0.08757 |
| 123 | O1 | DXY | 0.00029  | -0.01674 | 0.04787  | 0.02606  | -0.02959 |
| 124 | O1 | DXZ | 0.00000  | 0.00000  | 0.00000  | 0.00000  | 0.00000  |
| 125 | O1 | DYZ | 0.00000  | 0.00000  | 0.00000  | 0.00000  | 0.00000  |
| 126 | H4 | S   | -0.08356 | -0.06733 | -0.09411 | 0.00378  | 0.03941  |
| 127 | H4 | S   | 0.28429  | -0.17680 | 1.09115  | 0.16408  | -0.36203 |
| 128 | H4 | PX  | 0.00739  | 0.00269  | 0.04635  | -0.00265 | -0.00521 |
| 129 | H4 | PY  | -0.03811 | 0.00439  | -0.03816 | -0.01229 | 0.02089  |
| 130 | H4 | PZ  | 0.00000  | 0.00000  | 0.00000  | 0.00000  | 0.00000  |
| 131 | N1 | S   | 0.00694  | -0.00940 | 0.01110  | -0.00949 | -0.00052 |
| 132 | N1 | S   | -0.06107 | 0.10825  | -0.07349 | -0.00858 | 0.08266  |
| 133 | N1 | PX  | -0.00161 | -0.01208 | -0.00775 | -0.18097 | 0.15605  |
| 134 | N1 | PY  | 0.13209  | 0.03397  | -0.04997 | 0.03489  | -0.05709 |
| 135 | N1 | PZ  | 0.00000  | 0.00000  | 0.00000  | 0.00000  | 0.00000  |
| 136 | N1 | S   | -0.77712 | 0.29957  | -0.38373 | -0.12056 | 0.15982  |

|     |     |     |          |          |          |          |          |
|-----|-----|-----|----------|----------|----------|----------|----------|
| 137 | N1  | PX  | 0.09621  | 0.02421  | 0.10865  | 0.42586  | -0.42377 |
| 138 | N1  | PY  | -0.88707 | 0.49606  | -0.42717 | -0.13631 | 0.34839  |
| 139 | N1  | PZ  | 0.00000  | 0.00000  | 0.00000  | 0.00000  | 0.00000  |
| 140 | N1  | DXX | 0.00403  | 0.02726  | -0.00965 | -0.01500 | 0.00250  |
| 141 | N1  | DYY | -0.07636 | 0.03173  | -0.02322 | -0.02890 | 0.05091  |
| 142 | N1  | DZZ | 0.00528  | -0.01196 | 0.00131  | 0.04060  | -0.00545 |
| 143 | N1  | DXY | -0.01663 | 0.03105  | -0.00978 | -0.01820 | -0.01485 |
| 144 | N1  | DXZ | 0.00000  | 0.00000  | 0.00000  | 0.00000  | 0.00000  |
| 145 | N1  | DYZ | 0.00000  | 0.00000  | 0.00000  | 0.00000  | 0.00000  |
| 146 | H6  | S   | 0.05383  | -0.13782 | 0.07007  | 0.09683  | -0.02689 |
| 147 | H6  | S   | -0.45080 | -0.39645 | -0.22824 | -0.00484 | 0.49298  |
| 148 | H6  | PX  | -0.03034 | -0.01162 | -0.01878 | -0.00721 | 0.03164  |
| 149 | H6  | PY  | -0.02271 | -0.01437 | 0.00146  | -0.01346 | 0.02268  |
| 150 | H6  | PZ  | 0.00000  | 0.00000  | 0.00000  | 0.00000  | 0.00000  |
| 151 | C8  | S   | -0.00600 | 0.01925  | -0.00445 | 0.00047  | -0.00974 |
| 152 | C8  | S   | -0.04913 | 0.36273  | -0.19416 | 0.18178  | -0.16815 |
| 153 | C8  | PX  | -0.26067 | 0.34130  | -0.13295 | 0.01867  | -0.05912 |
| 154 | C8  | PY  | -0.12096 | 0.23742  | -0.03568 | -0.11802 | -0.13126 |
| 155 | C8  | PZ  | 0.00000  | 0.00000  | 0.00000  | 0.00000  | 0.00000  |
| 156 | C8  | S   | 0.40313  | -1.38695 | 0.49358  | -0.46983 | 0.87188  |
| 157 | C8  | PX  | 1.02411  | -1.46553 | 0.55939  | 0.17345  | 0.27864  |
| 158 | C8  | PY  | 1.37325  | -1.15792 | 0.11697  | 0.15788  | 0.84439  |
| 159 | C8  | PZ  | 0.00000  | 0.00000  | 0.00000  | 0.00000  | 0.00000  |
| 160 | C8  | DXX | 0.00762  | -0.02302 | -0.01013 | -0.02792 | 0.06430  |
| 161 | C8  | DYY | 0.00616  | 0.06587  | -0.01005 | -0.00308 | -0.05683 |
| 162 | C8  | DZZ | -0.01090 | 0.00481  | -0.00527 | 0.01636  | -0.00512 |
| 163 | C8  | DXY | 0.02515  | -0.06768 | 0.01432  | 0.02978  | 0.03386  |
| 164 | C8  | DXZ | 0.00000  | 0.00000  | 0.00000  | 0.00000  | 0.00000  |
| 165 | C8  | DYZ | 0.00000  | 0.00000  | 0.00000  | 0.00000  | 0.00000  |
| 166 | H8  | S   | -0.09255 | 0.03154  | -0.02469 | 0.01918  | 0.03142  |
| 167 | H8  | S   | -0.09934 | -0.59593 | 0.31407  | -0.39009 | 0.20660  |
| 168 | H8  | PX  | -0.00910 | 0.04253  | -0.01394 | 0.00620  | -0.00813 |
| 169 | H8  | PY  | 0.00406  | -0.00823 | 0.00511  | -0.00798 | 0.02037  |
| 170 | H8  | PZ  | 0.00000  | 0.00000  | 0.00000  | 0.00000  | 0.00000  |
| 171 | C10 | S   | -0.00556 | 0.00740  | 0.00715  | -0.01893 | -0.01301 |
| 172 | C10 | S   | -0.05148 | 0.19632  | -0.33812 | 0.99306  | -0.03232 |
| 173 | C10 | PX  | 0.04867  | 0.07408  | -0.05942 | 0.16977  | -0.11219 |
| 174 | C10 | PY  | -0.00343 | 0.18581  | 0.14558  | -0.50497 | -0.25379 |
| 175 | C10 | PZ  | 0.00000  | 0.00000  | 0.00000  | 0.00000  | 0.00000  |
| 176 | C10 | S   | 0.80049  | -0.42904 | 0.60750  | -2.06809 | 0.18155  |
| 177 | C10 | PX  | -0.42862 | 0.01508  | 0.11369  | -0.31916 | 0.14401  |
| 178 | C10 | PY  | 0.27929  | -0.54960 | -0.27087 | 0.87379  | 0.74511  |
| 179 | C10 | PZ  | 0.00000  | 0.00000  | 0.00000  | 0.00000  | 0.00000  |
| 180 | C10 | DXX | -0.02112 | 0.05039  | 0.04248  | -0.14717 | -0.06652 |
| 181 | C10 | DYY | 0.00741  | 0.00742  | -0.03067 | 0.10789  | -0.00411 |
| 182 | C10 | DZZ | 0.00526  | -0.02615 | -0.03945 | 0.12961  | 0.04740  |
| 183 | C10 | DXY | -0.00121 | 0.00623  | 0.03136  | -0.05484 | -0.03679 |
| 184 | C10 | DXZ | 0.00000  | 0.00000  | 0.00000  | 0.00000  | 0.00000  |
| 185 | C10 | DYZ | 0.00000  | 0.00000  | 0.00000  | 0.00000  | 0.00000  |
| 186 | H16 | S   | -0.12297 | 0.16498  | 0.09960  | -0.54482 | -0.10191 |
| 187 | H16 | S   | 0.25178  | -0.17985 | -0.37392 | 1.31945  | 0.19548  |
| 188 | H16 | PX  | -0.00667 | -0.00559 | 0.03711  | -0.11270 | -0.00428 |
| 189 | H16 | PY  | 0.01229  | -0.02209 | 0.01251  | 0.00644  | -0.00422 |
| 190 | H16 | PZ  | 0.00000  | 0.00000  | 0.00000  | 0.00000  | 0.00000  |

|     |     |     |          |          |          |          |          |
|-----|-----|-----|----------|----------|----------|----------|----------|
| 191 | H18 | S   | 0.02860  | -0.08736 | 0.24363  | -0.47483 | -0.14578 |
| 192 | H18 | S   | -0.15377 | -0.21689 | -0.39165 | 1.15214  | 0.57292  |
| 193 | H18 | PX  | 0.00672  | -0.02756 | -0.02522 | 0.09174  | 0.03810  |
| 194 | H18 | PY  | -0.01658 | 0.01203  | -0.02070 | 0.03124  | 0.01759  |
| 195 | H18 | PZ  | 0.00000  | 0.00000  | 0.00000  | 0.00000  | 0.00000  |
| 196 | C9  | S   | -0.01236 | -0.02849 | 0.00799  | 0.00547  | -0.03432 |
| 197 | C9  | S   | -0.06911 | 0.57228  | 1.25476  | 0.40205  | 0.51909  |
| 198 | C9  | PX  | 0.07609  | 0.16679  | 0.17055  | 0.03054  | 0.29920  |
| 199 | C9  | PY  | -0.02740 | 0.10872  | 0.23477  | 0.13860  | -0.05993 |
| 200 | C9  | PZ  | 0.00000  | 0.00000  | 0.00000  | 0.00000  | 0.00000  |
| 201 | C9  | S   | 0.47601  | -1.17172 | -3.04260 | -1.04100 | -1.25220 |
| 202 | C9  | PX  | -0.21715 | -0.24607 | -0.36210 | -0.03775 | -0.32452 |
| 203 | C9  | PY  | 0.24417  | -0.17398 | -0.32523 | -0.24162 | -0.06693 |
| 204 | C9  | PZ  | 0.00000  | 0.00000  | 0.00000  | 0.00000  | 0.00000  |
| 205 | C9  | DXX | 0.03379  | 0.04808  | 0.05331  | 0.01569  | 0.04232  |
| 206 | C9  | DYY | -0.00624 | 0.00176  | -0.02027 | -0.01486 | 0.07522  |
| 207 | C9  | DZZ | -0.04445 | -0.04389 | 0.08540  | 0.03831  | -0.14096 |
| 208 | C9  | DXY | 0.02616  | 0.03219  | 0.05260  | 0.02504  | -0.00925 |
| 209 | C9  | DXZ | 0.00000  | 0.00000  | 0.00000  | 0.00000  | 0.00000  |
| 210 | C9  | DYZ | 0.00000  | 0.00000  | 0.00000  | 0.00000  | 0.00000  |
| 211 | H3  | S   | -0.18089 | -0.27685 | -0.30122 | -0.10247 | 0.01494  |
| 212 | H3  | S   | -0.20351 | 0.47793  | 1.15773  | 0.49988  | 0.08984  |
| 213 | H3  | PX  | -0.00377 | 0.00831  | 0.04010  | 0.01852  | -0.00587 |
| 214 | H3  | PY  | -0.01167 | -0.05317 | -0.06557 | -0.02706 | -0.01898 |
| 215 | H3  | PZ  | 0.00000  | 0.00000  | 0.00000  | 0.00000  | 0.00000  |
| 216 | H5  | S   | -0.11222 | -0.27764 | -0.07562 | -0.00761 | -0.43512 |
| 217 | H5  | S   | 0.02722  | 0.48511  | 0.75554  | 0.20346  | 0.76038  |
| 218 | H5  | PX  | 0.00496  | -0.00882 | -0.03493 | -0.01149 | -0.00289 |
| 219 | H5  | PY  | 0.00447  | 0.01474  | 0.03049  | 0.01029  | -0.00099 |
| 220 | H5  | PZ  | 0.01744  | 0.04893  | 0.02318  | 0.00138  | 0.08127  |
| 221 | H7  | S   | -0.11222 | -0.27764 | -0.07562 | -0.00761 | -0.43512 |
| 222 | H7  | S   | 0.02722  | 0.48511  | 0.75554  | 0.20346  | 0.76038  |
| 223 | H7  | PX  | 0.00496  | -0.00882 | -0.03493 | -0.01149 | -0.00289 |
| 224 | H7  | PY  | 0.00447  | 0.01474  | 0.03049  | 0.01029  | -0.00099 |
| 225 | H7  | PZ  | -0.01744 | -0.04893 | -0.02318 | -0.00138 | -0.08127 |

|              |          |          |          |          |          |
|--------------|----------|----------|----------|----------|----------|
| MO:          | 106      | 107      | 108      | 109      | 110      |
| Eigenvalues: | 1.21214  | 1.24414  | 1.26238  | 1.28992  | 1.31200  |
| (ev):        | 32.98403 | 33.85491 | 34.35121 | 35.10064 | 35.70137 |

|    |    |    |          |          |          |          |          |
|----|----|----|----------|----------|----------|----------|----------|
|    |    |    | A        | A        | A        | A        | A        |
| 1  | H1 | S  | -0.21684 | 0.10511  | 0.14845  | -0.02904 | 0.00000  |
| 2  | H1 | S  | 0.92582  | 0.69236  | 0.51114  | 0.70170  | 0.00000  |
| 3  | H1 | PX | -0.04564 | -0.03309 | -0.00218 | -0.01319 | 0.00000  |
| 4  | H1 | PY | 0.00637  | 0.00951  | 0.02277  | -0.01011 | 0.00000  |
| 5  | H1 | PZ | 0.00000  | 0.00000  | 0.00000  | 0.00000  | -0.03548 |
| 6  | C1 | S  | 0.00014  | -0.00323 | -0.00353 | -0.00175 | 0.00000  |
| 7  | C1 | S  | 0.14693  | -0.13303 | 0.57927  | 0.17415  | 0.00000  |
| 8  | C1 | PX | 0.24925  | 0.37690  | -0.01844 | 0.21698  | 0.00000  |
| 9  | C1 | PY | -0.07951 | -0.06265 | -0.33775 | -0.30189 | 0.00000  |
| 10 | C1 | PZ | 0.00000  | 0.00000  | 0.00000  | 0.00000  | -0.01390 |
| 11 | C1 | S  | -0.87398 | 0.36068  | -0.44056 | -0.30671 | 0.00000  |
| 12 | C1 | PX | -0.77387 | -1.07033 | -1.28753 | -0.71555 | 0.00000  |
| 13 | C1 | PY | -0.03738 | 0.29432  | 1.66558  | 0.20174  | 0.00000  |

|    |    |     |          |          |          |          |          |
|----|----|-----|----------|----------|----------|----------|----------|
| 14 | C1 | PZ  | 0.00000  | 0.00000  | 0.00000  | 0.00000  | -0.21785 |
| 15 | C1 | DXX | -0.05619 | -0.04457 | 0.07925  | -0.00427 | 0.00000  |
| 16 | C1 | DYY | 0.05271  | -0.01272 | 0.01317  | 0.02305  | 0.00000  |
| 17 | C1 | DZZ | 0.02848  | 0.03999  | 0.01289  | 0.02255  | 0.00000  |
| 18 | C1 | DXY | -0.02345 | -0.02680 | 0.01112  | -0.06611 | 0.00000  |
| 19 | C1 | DXZ | 0.00000  | 0.00000  | 0.00000  | 0.00000  | -0.08396 |
| 20 | C1 | DYZ | 0.00000  | 0.00000  | 0.00000  | 0.00000  | 0.00360  |
| 21 | C2 | S   | -0.02085 | 0.00693  | 0.00160  | 0.01114  | 0.00000  |
| 22 | C2 | S   | -0.35139 | 0.31731  | 0.05248  | 0.02432  | 0.00000  |
| 23 | C2 | PX  | -0.15789 | 0.26498  | -0.10126 | 0.02719  | 0.00000  |
| 24 | C2 | PY  | 0.35363  | -0.06370 | 0.06379  | -0.12691 | 0.00000  |
| 25 | C2 | PZ  | 0.00000  | 0.00000  | 0.00000  | 0.00000  | 0.04122  |
| 26 | C2 | S   | 1.55560  | -0.52828 | -0.36334 | 0.09000  | 0.00000  |
| 27 | C2 | PX  | 0.35162  | -1.36803 | 0.82629  | -0.06519 | 0.00000  |
| 28 | C2 | PY  | -1.81122 | 2.08660  | -0.25918 | 0.45881  | 0.00000  |
| 29 | C2 | PZ  | 0.00000  | 0.00000  | 0.00000  | 0.00000  | -0.01100 |
| 30 | C2 | DXX | -0.03936 | 0.03295  | 0.04439  | 0.00069  | 0.00000  |
| 31 | C2 | DYY | -0.03216 | 0.04995  | -0.05189 | 0.02117  | 0.00000  |
| 32 | C2 | DZZ | 0.02102  | -0.03604 | 0.02401  | -0.01806 | 0.00000  |
| 33 | C2 | DXY | -0.13341 | 0.03193  | -0.00570 | 0.02561  | 0.00000  |
| 34 | C2 | DXZ | 0.00000  | 0.00000  | 0.00000  | 0.00000  | 0.03471  |
| 35 | C2 | DYZ | 0.00000  | 0.00000  | 0.00000  | 0.00000  | 0.00073  |
| 36 | C3 | S   | -0.00013 | -0.00937 | -0.01052 | -0.02177 | 0.00000  |
| 37 | C3 | S   | 0.15695  | -0.16640 | 0.22837  | -0.67691 | 0.00000  |
| 38 | C3 | PX  | 0.07443  | 0.23517  | -0.28117 | 0.22769  | 0.00000  |
| 39 | C3 | PY  | 0.01834  | -0.01184 | -0.32622 | -0.09252 | 0.00000  |
| 40 | C3 | PZ  | 0.00000  | 0.00000  | 0.00000  | 0.00000  | 0.06487  |
| 41 | C3 | S   | -1.14572 | 2.07966  | 0.68063  | 1.10364  | 0.00000  |
| 42 | C3 | PX  | 0.34925  | -1.28077 | 1.57095  | -1.37294 | 0.00000  |
| 43 | C3 | PY  | 0.07034  | -0.84208 | 0.54933  | 0.00485  | 0.00000  |
| 44 | C3 | PZ  | 0.00000  | 0.00000  | 0.00000  | 0.00000  | -0.04037 |
| 45 | C3 | DXX | -0.00420 | 0.04583  | -0.00273 | -0.10594 | 0.00000  |
| 46 | C3 | DYY | 0.00950  | -0.02016 | 0.05300  | -0.06192 | 0.00000  |
| 47 | C3 | DZZ | 0.01496  | -0.00625 | 0.00203  | 0.03893  | 0.00000  |
| 48 | C3 | DXY | 0.06571  | 0.08598  | 0.03538  | 0.04433  | 0.00000  |
| 49 | C3 | DXZ | 0.00000  | 0.00000  | 0.00000  | 0.00000  | -0.02804 |
| 50 | C3 | DYZ | 0.00000  | 0.00000  | 0.00000  | 0.00000  | 0.00753  |
| 51 | C4 | S   | 0.00976  | -0.01933 | -0.00720 | -0.00344 | 0.00000  |
| 52 | C4 | S   | 0.12006  | -0.44846 | -0.18026 | 0.29140  | 0.00000  |
| 53 | C4 | PX  | -0.19026 | 0.27922  | -0.00718 | -0.01154 | 0.00000  |
| 54 | C4 | PY  | -0.02341 | 0.19748  | 0.06910  | -0.24838 | 0.00000  |
| 55 | C4 | PZ  | 0.00000  | 0.00000  | 0.00000  | 0.00000  | -0.16381 |
| 56 | C4 | S   | -1.57462 | 0.23481  | -0.74958 | -1.50099 | 0.00000  |
| 57 | C4 | PX  | 1.35779  | -0.83939 | -1.27590 | 0.43759  | 0.00000  |
| 58 | C4 | PY  | -0.10404 | -0.41852 | 0.58809  | 0.32299  | 0.00000  |
| 59 | C4 | PZ  | 0.00000  | 0.00000  | 0.00000  | 0.00000  | 0.69294  |
| 60 | C4 | DXX | -0.01790 | -0.06747 | -0.07124 | 0.03832  | 0.00000  |
| 61 | C4 | DYY | -0.03703 | -0.04126 | -0.03021 | -0.09389 | 0.00000  |
| 62 | C4 | DZZ | 0.02894  | 0.02705  | 0.03266  | 0.02599  | 0.00000  |
| 63 | C4 | DXY | -0.00380 | 0.05902  | -0.02974 | 0.03162  | 0.00000  |
| 64 | C4 | DXZ | 0.00000  | 0.00000  | 0.00000  | 0.00000  | 0.00700  |
| 65 | C4 | DYZ | 0.00000  | 0.00000  | 0.00000  | 0.00000  | -0.06147 |
| 66 | C5 | S   | -0.01406 | 0.02573  | -0.01000 | -0.00792 | 0.00000  |
| 67 | C5 | S   | -0.53880 | 0.62714  | -0.30958 | 0.18540  | 0.00000  |



|     |    |     |          |          |          |          |          |
|-----|----|-----|----------|----------|----------|----------|----------|
| 68  | C5 | PX  | -0.15006 | -0.00840 | -0.06003 | 0.08041  | 0.00000  |
| 69  | C5 | PY  | 0.22151  | 0.11783  | 0.15149  | -0.23924 | 0.00000  |
| 70  | C5 | PZ  | 0.00000  | 0.00000  | 0.00000  | 0.00000  | -0.06600 |
| 71  | C5 | S   | 2.54324  | -3.06001 | 0.05453  | 0.22546  | 0.00000  |
| 72  | C5 | PX  | 0.80489  | 0.56768  | -0.09964 | 0.03376  | 0.00000  |
| 73  | C5 | PY  | -0.18922 | 0.50219  | -1.04922 | 0.87647  | 0.00000  |
| 74  | C5 | PZ  | 0.00000  | 0.00000  | 0.00000  | 0.00000  | -0.07711 |
| 75  | C5 | DXX | -0.03524 | 0.00330  | -0.06985 | 0.05628  | 0.00000  |
| 76  | C5 | DYY | -0.04361 | 0.07013  | -0.01293 | -0.01525 | 0.00000  |
| 77  | C5 | DZZ | 0.01826  | -0.00066 | 0.02794  | -0.00231 | 0.00000  |
| 78  | C5 | DXY | 0.10458  | -0.06102 | -0.01080 | 0.03842  | 0.00000  |
| 79  | C5 | DXZ | 0.00000  | 0.00000  | 0.00000  | 0.00000  | 0.05756  |
| 80  | C5 | DYZ | 0.00000  | 0.00000  | 0.00000  | 0.00000  | -0.05389 |
| 81  | C6 | S   | 0.02446  | 0.00443  | -0.00344 | 0.00929  | 0.00000  |
| 82  | C6 | S   | 0.87775  | 0.27574  | -0.39825 | -0.24555 | 0.00000  |
| 83  | C6 | PX  | -0.31966 | 0.49141  | -0.17371 | 0.10802  | 0.00000  |
| 84  | C6 | PY  | 0.06245  | 0.07181  | 0.24238  | 0.08697  | 0.00000  |
| 85  | C6 | PZ  | 0.00000  | 0.00000  | 0.00000  | 0.00000  | 0.06706  |
| 86  | C6 | S   | -3.18225 | -0.44922 | 1.99264  | 0.27736  | 0.00000  |
| 87  | C6 | PX  | 1.91084  | -3.11440 | 0.79990  | -1.00934 | 0.00000  |
| 88  | C6 | PY  | 0.24671  | 0.28706  | -1.69868 | -0.57133 | 0.00000  |
| 89  | C6 | PZ  | 0.00000  | 0.00000  | 0.00000  | 0.00000  | -0.16109 |
| 90  | C6 | DXX | 0.06563  | 0.06516  | 0.01234  | -0.10385 | 0.00000  |
| 91  | C6 | DYY | 0.00035  | -0.00958 | 0.01212  | 0.06077  | 0.00000  |
| 92  | C6 | DZZ | 0.02516  | -0.01305 | -0.01937 | 0.00219  | 0.00000  |
| 93  | C6 | DXY | 0.00626  | -0.07061 | 0.05334  | -0.02431 | 0.00000  |
| 94  | C6 | DXZ | 0.00000  | 0.00000  | 0.00000  | 0.00000  | 0.00344  |
| 95  | C6 | DYZ | 0.00000  | 0.00000  | 0.00000  | 0.00000  | 0.02578  |
| 96  | C7 | S   | -0.00066 | -0.01154 | 0.01902  | -0.00120 | 0.00000  |
| 97  | C7 | S   | -0.35655 | -0.59170 | -0.42509 | -0.15167 | 0.00000  |
| 98  | C7 | PX  | 0.11873  | -0.23889 | 0.11479  | -0.06216 | 0.00000  |
| 99  | C7 | PY  | -0.15885 | -0.13028 | -0.15763 | -0.10909 | 0.00000  |
| 100 | C7 | PZ  | 0.00000  | 0.00000  | 0.00000  | 0.00000  | -0.05110 |
| 101 | C7 | S   | 0.66998  | 0.80359  | 0.20595  | 0.29866  | 0.00000  |
| 102 | C7 | PX  | -0.40449 | 1.17914  | 0.50624  | -0.04455 | 0.00000  |
| 103 | C7 | PY  | 0.27831  | 0.34328  | -0.29365 | 1.08222  | 0.00000  |
| 104 | C7 | PZ  | 0.00000  | 0.00000  | 0.00000  | 0.00000  | 0.12496  |
| 105 | C7 | DXX | 0.00041  | -0.04629 | -0.06840 | 0.01228  | 0.00000  |
| 106 | C7 | DYY | -0.05436 | -0.01509 | 0.02018  | -0.00258 | 0.00000  |
| 107 | C7 | DZZ | 0.00264  | -0.01394 | -0.02453 | -0.00177 | 0.00000  |
| 108 | C7 | DXY | -0.03772 | 0.00323  | 0.01843  | -0.01125 | 0.00000  |
| 109 | C7 | DXZ | 0.00000  | 0.00000  | 0.00000  | 0.00000  | 0.01754  |
| 110 | C7 | DYZ | 0.00000  | 0.00000  | 0.00000  | 0.00000  | 0.00090  |
| 111 | O1 | S   | -0.00272 | -0.00063 | 0.00932  | -0.00154 | 0.00000  |
| 112 | O1 | S   | 0.18752  | 0.06420  | 0.17595  | 0.07162  | 0.00000  |
| 113 | O1 | PX  | -0.08752 | 0.02307  | -0.17924 | -0.11557 | 0.00000  |
| 114 | O1 | PY  | 0.02853  | -0.06486 | 0.09293  | 0.32979  | 0.00000  |
| 115 | O1 | PZ  | 0.00000  | 0.00000  | 0.00000  | 0.00000  | 0.89368  |
| 116 | O1 | S   | -0.10384 | 0.03755  | -0.55689 | -0.06412 | 0.00000  |
| 117 | O1 | PX  | -0.13813 | 0.08208  | 0.38265  | 0.04772  | 0.00000  |
| 118 | O1 | PY  | -0.34777 | 0.03851  | -0.09649 | -0.71209 | 0.00000  |
| 119 | O1 | PZ  | 0.00000  | 0.00000  | 0.00000  | 0.00000  | -1.30584 |
| 120 | O1 | DXX | 0.05940  | 0.01518  | 0.02244  | 0.06313  | 0.00000  |
| 121 | O1 | DYY | 0.08882  | 0.03872  | 0.07831  | 0.00208  | 0.00000  |

|     |     |     |          |          |          |          |          |
|-----|-----|-----|----------|----------|----------|----------|----------|
| 122 | O1  | DZZ | 0.03487  | 0.00626  | 0.10047  | 0.04051  | 0.00000  |
| 123 | O1  | DXY | 0.01417  | -0.02438 | 0.02176  | -0.00398 | 0.00000  |
| 124 | O1  | DXZ | 0.00000  | 0.00000  | 0.00000  | 0.00000  | 0.02743  |
| 125 | O1  | DYZ | 0.00000  | 0.00000  | 0.00000  | 0.00000  | 0.01129  |
| 126 | H4  | S   | -0.20388 | 0.08075  | 0.12908  | -0.21431 | 0.00000  |
| 127 | H4  | S   | 0.37254  | 0.36507  | 0.31973  | -0.23741 | 0.00000  |
| 128 | H4  | PX  | 0.02849  | 0.03560  | 0.00194  | -0.00954 | 0.00000  |
| 129 | H4  | PY  | -0.00097 | -0.00161 | 0.00118  | 0.00052  | 0.00000  |
| 130 | H4  | PZ  | 0.00000  | 0.00000  | 0.00000  | 0.00000  | -0.03337 |
| 131 | N1  | S   | 0.00462  | 0.00087  | -0.00902 | -0.00385 | 0.00000  |
| 132 | N1  | S   | 0.18821  | -0.01975 | -0.05145 | 0.27352  | 0.00000  |
| 133 | N1  | PX  | 0.10133  | 0.05949  | -0.13284 | 0.02056  | 0.00000  |
| 134 | N1  | PY  | -0.20812 | -0.22705 | 0.14274  | 0.28361  | 0.00000  |
| 135 | N1  | PZ  | 0.00000  | 0.00000  | 0.00000  | 0.00000  | -0.08362 |
| 136 | N1  | S   | 0.03652  | -0.09087 | -0.39746 | 0.01071  | 0.00000  |
| 137 | N1  | PX  | -0.79117 | 0.28853  | 0.60960  | 0.50981  | 0.00000  |
| 138 | N1  | PY  | 0.95984  | 0.43751  | -0.78939 | -0.94533 | 0.00000  |
| 139 | N1  | PZ  | 0.00000  | 0.00000  | 0.00000  | 0.00000  | 0.18710  |
| 140 | N1  | DXX | 0.01205  | 0.01095  | 0.02856  | 0.10460  | 0.00000  |
| 141 | N1  | DYY | 0.11397  | 0.00096  | -0.10642 | 0.02044  | 0.00000  |
| 142 | N1  | DZZ | -0.00600 | -0.00726 | 0.02334  | -0.00252 | 0.00000  |
| 143 | N1  | DXY | 0.01198  | 0.02598  | -0.05041 | -0.02137 | 0.00000  |
| 144 | N1  | DXZ | 0.00000  | 0.00000  | 0.00000  | 0.00000  | -0.00884 |
| 145 | N1  | DYZ | 0.00000  | 0.00000  | 0.00000  | 0.00000  | -0.01394 |
| 146 | H6  | S   | -0.22127 | -0.13569 | 0.23004  | -0.04675 | 0.00000  |
| 147 | H6  | S   | -0.10305 | -0.36045 | 0.35207  | 0.02711  | 0.00000  |
| 148 | H6  | PX  | 0.00374  | -0.01370 | -0.00852 | 0.01046  | 0.00000  |
| 149 | H6  | PY  | 0.01106  | 0.01448  | 0.01363  | -0.02725 | 0.00000  |
| 150 | H6  | PZ  | 0.00000  | 0.00000  | 0.00000  | 0.00000  | -0.01043 |
| 151 | C8  | S   | -0.00876 | 0.00163  | 0.01724  | 0.00824  | 0.00000  |
| 152 | C8  | S   | -0.39288 | 0.03776  | 0.37415  | 0.52273  | 0.00000  |
| 153 | C8  | PX  | 0.11474  | 0.09484  | 0.00837  | -0.08659 | 0.00000  |
| 154 | C8  | PY  | -0.10454 | 0.01533  | 0.34543  | -0.09524 | 0.00000  |
| 155 | C8  | PZ  | 0.00000  | 0.00000  | 0.00000  | 0.00000  | 0.02018  |
| 156 | C8  | S   | 1.31443  | 0.05389  | -0.77535 | -1.73110 | 0.00000  |
| 157 | C8  | PX  | -0.78614 | -0.24986 | 0.90102  | 1.32473  | 0.00000  |
| 158 | C8  | PY  | -0.11046 | 0.74193  | -1.01047 | 0.27627  | 0.00000  |
| 159 | C8  | PZ  | 0.00000  | 0.00000  | 0.00000  | 0.00000  | -0.10435 |
| 160 | C8  | DXX | -0.00308 | 0.04237  | 0.00866  | 0.05745  | 0.00000  |
| 161 | C8  | DYY | -0.04885 | 0.00022  | 0.06034  | -0.00940 | 0.00000  |
| 162 | C8  | DZZ | 0.00690  | -0.01054 | -0.02498 | 0.01696  | 0.00000  |
| 163 | C8  | DXY | -0.02782 | 0.00635  | -0.00176 | 0.04306  | 0.00000  |
| 164 | C8  | DXZ | 0.00000  | 0.00000  | 0.00000  | 0.00000  | -0.00463 |
| 165 | C8  | DYZ | 0.00000  | 0.00000  | 0.00000  | 0.00000  | -0.01434 |
| 166 | H8  | S   | 0.16773  | -0.02269 | -0.43883 | 0.18006  | 0.00000  |
| 167 | H8  | S   | -0.04077 | -0.85450 | -0.18300 | -0.11173 | 0.00000  |
| 168 | H8  | PX  | 0.00572  | 0.04548  | -0.02534 | 0.02336  | 0.00000  |
| 169 | H8  | PY  | 0.00538  | 0.00500  | 0.00723  | 0.03225  | 0.00000  |
| 170 | H8  | PZ  | 0.00000  | 0.00000  | 0.00000  | 0.00000  | 0.01428  |
| 171 | C10 | S   | -0.00069 | -0.01109 | -0.00352 | -0.00650 | 0.00000  |
| 172 | C10 | S   | 0.34930  | 0.13360  | 0.21959  | -0.60561 | 0.00000  |
| 173 | C10 | PX  | -0.06801 | 0.09289  | 0.00996  | -0.05760 | 0.00000  |
| 174 | C10 | PY  | -0.17295 | -0.05461 | 0.19299  | -0.24572 | 0.00000  |
| 175 | C10 | PZ  | 0.00000  | 0.00000  | 0.00000  | 0.00000  | 0.01152  |

|     |     |     |          |          |          |          |          |
|-----|-----|-----|----------|----------|----------|----------|----------|
| 176 | C10 | S   | -1.19547 | 0.22603  | -0.75172 | 1.48110  | 0.00000  |
| 177 | C10 | PX  | 0.36691  | -0.42311 | -0.52336 | -0.35827 | 0.00000  |
| 178 | C10 | PY  | 0.29228  | 0.42100  | -0.73235 | 0.52709  | 0.00000  |
| 179 | C10 | PZ  | 0.00000  | 0.00000  | 0.00000  | 0.00000  | 0.00637  |
| 180 | C10 | DXX | -0.04040 | -0.03413 | 0.08028  | -0.04491 | 0.00000  |
| 181 | C10 | DYY | 0.02166  | 0.00058  | -0.04783 | -0.00945 | 0.00000  |
| 182 | C10 | DZZ | 0.05376  | 0.03714  | -0.01048 | -0.02583 | 0.00000  |
| 183 | C10 | DXY | -0.00660 | -0.02546 | -0.03952 | -0.05106 | 0.00000  |
| 184 | C10 | DXZ | 0.00000  | 0.00000  | 0.00000  | 0.00000  | -0.00562 |
| 185 | C10 | DYZ | 0.00000  | 0.00000  | 0.00000  | 0.00000  | 0.00161  |
| 186 | H16 | S   | -0.04818 | -0.04376 | 0.18791  | 0.02707  | 0.00000  |
| 187 | H16 | S   | 0.25763  | 0.41301  | 0.00957  | -0.08654 | 0.00000  |
| 188 | H16 | PX  | -0.01735 | -0.02579 | 0.00351  | 0.01965  | 0.00000  |
| 189 | H16 | PY  | -0.00792 | -0.01187 | -0.01270 | -0.01068 | 0.00000  |
| 190 | H16 | PZ  | 0.00000  | 0.00000  | 0.00000  | 0.00000  | -0.00139 |
| 191 | H18 | S   | -0.09729 | -0.19962 | -0.19232 | -0.13063 | 0.00000  |
| 192 | H18 | S   | 0.63962  | 0.18212  | -0.28093 | -0.10504 | 0.00000  |
| 193 | H18 | PX  | 0.03015  | 0.00378  | -0.01844 | 0.01172  | 0.00000  |
| 194 | H18 | PY  | 0.02232  | 0.01301  | 0.02793  | 0.00491  | 0.00000  |
| 195 | H18 | PZ  | 0.00000  | 0.00000  | 0.00000  | 0.00000  | 0.00115  |
| 196 | C9  | S   | -0.00030 | 0.01094  | -0.01323 | 0.00810  | 0.00000  |
| 197 | C9  | S   | -0.25940 | -0.00676 | -0.24006 | -0.00135 | 0.00000  |
| 198 | C9  | PX  | -0.06453 | -0.01280 | 0.05003  | -0.03826 | 0.00000  |
| 199 | C9  | PY  | -0.04055 | -0.20053 | -0.04761 | 0.07557  | 0.00000  |
| 200 | C9  | PZ  | 0.00000  | 0.00000  | 0.00000  | 0.00000  | 0.03576  |
| 201 | C9  | S   | 0.88392  | 0.07191  | 0.59488  | 0.15526  | 0.00000  |
| 202 | C9  | PX  | -0.09423 | -0.06363 | -0.08421 | -0.19331 | 0.00000  |
| 203 | C9  | PY  | 0.39010  | 0.29738  | 0.30830  | 0.21125  | 0.00000  |
| 204 | C9  | PZ  | 0.00000  | 0.00000  | 0.00000  | 0.00000  | 0.47754  |
| 205 | C9  | DXX | -0.03115 | 0.00638  | -0.03902 | -0.05157 | 0.00000  |
| 206 | C9  | DYY | -0.05500 | 0.01864  | -0.04208 | -0.04265 | 0.00000  |
| 207 | C9  | DZZ | 0.06973  | 0.00588  | 0.02837  | 0.12195  | 0.00000  |
| 208 | C9  | DXY | 0.01495  | -0.03736 | -0.01191 | 0.09204  | 0.00000  |
| 209 | C9  | DXZ | 0.00000  | 0.00000  | 0.00000  | 0.00000  | -0.01271 |
| 210 | C9  | DYZ | 0.00000  | 0.00000  | 0.00000  | 0.00000  | 0.13669  |
| 211 | H3  | S   | -0.18435 | 0.16437  | -0.10238 | -0.19870 | 0.00000  |
| 212 | H3  | S   | -0.23111 | -0.32332 | -0.22466 | 0.09266  | 0.00000  |
| 213 | H3  | PX  | 0.00897  | -0.02624 | 0.00597  | 0.06077  | 0.00000  |
| 214 | H3  | PY  | 0.00694  | 0.03091  | 0.00976  | 0.00224  | 0.00000  |
| 215 | H3  | PZ  | 0.00000  | 0.00000  | 0.00000  | 0.00000  | 0.07959  |
| 216 | H5  | S   | 0.14212  | 0.11151  | 0.01905  | 0.13284  | 0.12674  |
| 217 | H5  | S   | -0.31950 | -0.02019 | -0.15374 | -0.13259 | 0.08823  |
| 218 | H5  | PX  | -0.01206 | 0.00982  | -0.01450 | -0.03980 | -0.02936 |
| 219 | H5  | PY  | 0.00926  | -0.00147 | 0.00250  | 0.02351  | -0.06824 |
| 220 | H5  | PZ  | -0.03157 | 0.00016  | -0.00870 | -0.04583 | 0.00031  |
| 221 | H7  | S   | 0.14212  | 0.11151  | 0.01905  | 0.13284  | -0.12674 |
| 222 | H7  | S   | -0.31950 | -0.02019 | -0.15374 | -0.13259 | -0.08823 |
| 223 | H7  | PX  | -0.01206 | 0.00982  | -0.01450 | -0.03980 | 0.02936  |
| 224 | H7  | PY  | 0.00926  | -0.00147 | 0.00250  | 0.02351  | 0.06824  |
| 225 | H7  | PZ  | 0.03157  | -0.00016 | 0.00870  | 0.04583  | 0.00031  |

|              |          |          |          |          |          |
|--------------|----------|----------|----------|----------|----------|
| MO:          | 111      | 112      | 113      | 114      | 115      |
| Eigenvalues: | 1.32518  | 1.38955  | 1.40283  | 1.43085  | 1.44189  |
| (ev):        | 36.05988 | 37.81152 | 38.17308 | 38.93552 | 39.23593 |

|    |    | A   | A        | A        | A        | A        |          |
|----|----|-----|----------|----------|----------|----------|----------|
| 1  | H1 | S   | 0.24323  | -0.18973 | -0.15681 | 0.39863  | 0.41746  |
| 2  | H1 | S   | -0.31426 | 0.20582  | -0.30281 | 0.28971  | 0.52346  |
| 3  | H1 | PX  | 0.03043  | -0.02886 | -0.00866 | -0.00712 | 0.00789  |
| 4  | H1 | PY  | 0.00012  | -0.02112 | -0.00137 | -0.02258 | 0.00920  |
| 5  | H1 | PZ  | 0.00000  | 0.00000  | 0.00000  | 0.00000  | 0.00000  |
| 6  | C1 | S   | -0.00226 | 0.02531  | 0.01688  | 0.01250  | 0.01621  |
| 7  | C1 | S   | 0.37608  | 0.45633  | 0.30298  | 0.01441  | 0.49269  |
| 8  | C1 | PX  | -0.31523 | 0.10331  | -0.16626 | 0.22062  | -0.08212 |
| 9  | C1 | PY  | 0.20206  | 0.09509  | 0.13929  | 0.19378  | 0.25830  |
| 10 | C1 | PZ  | 0.00000  | 0.00000  | 0.00000  | 0.00000  | 0.00000  |
| 11 | C1 | S   | -0.97764 | -2.56479 | -1.60913 | -2.67605 | -1.76407 |
| 12 | C1 | PX  | 1.51170  | 0.44336  | 1.50669  | 0.44054  | -0.88679 |
| 13 | C1 | PY  | -3.94887 | 0.73740  | -0.99287 | -3.47423 | -0.64809 |
| 14 | C1 | PZ  | 0.00000  | 0.00000  | 0.00000  | 0.00000  | 0.00000  |
| 15 | C1 | DXX | 0.04321  | 0.03832  | -0.03234 | 0.05481  | 0.10750  |
| 16 | C1 | DYY | 0.03874  | 0.01596  | 0.03994  | -0.05737 | -0.03212 |
| 17 | C1 | DZZ | -0.01780 | -0.02297 | 0.01094  | -0.00787 | -0.01061 |
| 18 | C1 | DXY | 0.11616  | -0.03919 | 0.04169  | 0.12768  | 0.05879  |
| 19 | C1 | DXZ | 0.00000  | 0.00000  | 0.00000  | 0.00000  | 0.00000  |
| 20 | C1 | DYZ | 0.00000  | 0.00000  | 0.00000  | 0.00000  | 0.00000  |
| 21 | C2 | S   | 0.00416  | 0.02343  | 0.01165  | 0.00787  | -0.01066 |
| 22 | C2 | S   | -0.38503 | 0.59148  | 0.21648  | 0.63036  | -0.28439 |
| 23 | C2 | PX  | -0.15856 | 0.04926  | -0.06282 | 0.29974  | 0.02257  |
| 24 | C2 | PY  | -0.25834 | -0.12448 | 0.02914  | 0.21034  | -0.10859 |
| 25 | C2 | PZ  | 0.00000  | 0.00000  | 0.00000  | 0.00000  | 0.00000  |
| 26 | C2 | S   | 0.64566  | -2.24522 | -1.23886 | -0.16494 | 0.89136  |
| 27 | C2 | PX  | -0.89269 | -0.34595 | -0.14029 | -0.41590 | -0.96315 |
| 28 | C2 | PY  | 2.09254  | 0.37308  | 1.12802  | -0.90981 | 0.72873  |
| 29 | C2 | PZ  | 0.00000  | 0.00000  | 0.00000  | 0.00000  | 0.00000  |
| 30 | C2 | DXX | -0.09734 | 0.06048  | 0.04620  | 0.05965  | -0.06467 |
| 31 | C2 | DYY | 0.03500  | 0.04792  | -0.02036 | 0.02190  | 0.02150  |
| 32 | C2 | DZZ | -0.00864 | -0.03573 | 0.00570  | 0.00317  | 0.01106  |
| 33 | C2 | DXY | 0.01216  | 0.05762  | -0.00293 | -0.06686 | -0.03878 |
| 34 | C2 | DXZ | 0.00000  | 0.00000  | 0.00000  | 0.00000  | 0.00000  |
| 35 | C2 | DYZ | 0.00000  | 0.00000  | 0.00000  | 0.00000  | 0.00000  |
| 36 | C3 | S   | 0.00843  | 0.00276  | -0.00511 | -0.00622 | -0.02441 |
| 37 | C3 | S   | 0.34117  | -0.25382 | -0.08341 | -0.10878 | -0.73411 |
| 38 | C3 | PX  | 0.39302  | -0.09602 | -0.11995 | 0.29704  | -0.18955 |
| 39 | C3 | PY  | -0.05948 | -0.25964 | 0.32786  | 0.02348  | -0.03781 |
| 40 | C3 | PZ  | 0.00000  | 0.00000  | 0.00000  | 0.00000  | 0.00000  |
| 41 | C3 | S   | -2.11717 | 1.91337  | 1.69674  | -0.86518 | 2.60288  |
| 42 | C3 | PX  | -2.69227 | 1.11612  | -0.28756 | -1.78607 | 1.39338  |
| 43 | C3 | PY  | -2.19785 | 1.23906  | -1.29306 | -1.21229 | -0.51876 |
| 44 | C3 | PZ  | 0.00000  | 0.00000  | 0.00000  | 0.00000  | 0.00000  |
| 45 | C3 | DXX | 0.02060  | 0.00579  | 0.00047  | -0.02281 | 0.00166  |
| 46 | C3 | DYY | -0.01637 | 0.03353  | 0.03122  | -0.03278 | -0.05025 |
| 47 | C3 | DZZ | 0.01668  | -0.05734 | -0.00703 | 0.01494  | -0.01015 |
| 48 | C3 | DXY | -0.00902 | -0.00304 | -0.00244 | -0.06955 | -0.00822 |
| 49 | C3 | DXZ | 0.00000  | 0.00000  | 0.00000  | 0.00000  | 0.00000  |
| 50 | C3 | DYZ | 0.00000  | 0.00000  | 0.00000  | 0.00000  | 0.00000  |
| 51 | C4 | S   | 0.00828  | -0.00474 | -0.00471 | 0.00804  | 0.00679  |
| 52 | C4 | S   | -0.17955 | 0.16306  | -0.24883 | -0.02840 | -0.14671 |

|     |    |     |          |          |          |          |          |
|-----|----|-----|----------|----------|----------|----------|----------|
| 53  | C4 | PX  | -0.43119 | 0.00737  | -0.15378 | -0.37145 | -0.13771 |
| 54  | C4 | PY  | 0.15094  | -0.08479 | 0.08048  | 0.14315  | 0.19012  |
| 55  | C4 | PZ  | 0.00000  | 0.00000  | 0.00000  | 0.00000  | 0.00000  |
| 56  | C4 | S   | 1.62738  | -0.28058 | 1.76256  | 1.01312  | -0.71170 |
| 57  | C4 | PX  | 4.15538  | -0.08707 | 1.48868  | 4.94507  | 1.11645  |
| 58  | C4 | PY  | 0.06531  | -0.99243 | -0.76069 | -1.22448 | 0.39803  |
| 59  | C4 | PZ  | 0.00000  | 0.00000  | 0.00000  | 0.00000  | 0.00000  |
| 60  | C4 | DXX | 0.03552  | 0.08391  | -0.03413 | 0.02010  | -0.03066 |
| 61  | C4 | DYY | 0.01799  | -0.06916 | 0.04795  | 0.03397  | 0.00170  |
| 62  | C4 | DZZ | -0.04420 | -0.04393 | -0.00839 | -0.01827 | -0.00295 |
| 63  | C4 | DXY | -0.06181 | -0.04635 | -0.06761 | 0.00009  | -0.06036 |
| 64  | C4 | DXZ | 0.00000  | 0.00000  | 0.00000  | 0.00000  | 0.00000  |
| 65  | C4 | DYZ | 0.00000  | 0.00000  | 0.00000  | 0.00000  | 0.00000  |
| 66  | C5 | S   | -0.00170 | 0.00214  | -0.01077 | -0.03814 | -0.00689 |
| 67  | C5 | S   | 0.25751  | -0.19340 | -0.37421 | -0.62970 | -0.04697 |
| 68  | C5 | PX  | -0.06005 | -0.09713 | -0.17901 | 0.22268  | -0.11751 |
| 69  | C5 | PY  | -0.22758 | 0.04228  | 0.09477  | 0.03601  | -0.07210 |
| 70  | C5 | PZ  | 0.00000  | 0.00000  | 0.00000  | 0.00000  | 0.00000  |
| 71  | C5 | S   | 0.18830  | 0.48761  | 0.44628  | 4.74132  | 0.16194  |
| 72  | C5 | PX  | 2.16539  | -0.43037 | 0.90094  | 0.61882  | 1.81747  |
| 73  | C5 | PY  | 1.59804  | 0.18840  | 0.27157  | 1.54207  | 0.19289  |
| 74  | C5 | PZ  | 0.00000  | 0.00000  | 0.00000  | 0.00000  | 0.00000  |
| 75  | C5 | DXX | 0.10789  | -0.03357 | -0.05696 | -0.05394 | -0.00621 |
| 76  | C5 | DYY | -0.02922 | 0.02669  | -0.03635 | -0.00980 | -0.01157 |
| 77  | C5 | DZZ | -0.01558 | -0.03596 | 0.03237  | -0.00112 | 0.01858  |
| 78  | C5 | DXY | -0.03334 | 0.03949  | -0.00109 | 0.13816  | -0.03926 |
| 79  | C5 | DXZ | 0.00000  | 0.00000  | 0.00000  | 0.00000  | 0.00000  |
| 80  | C5 | DYZ | 0.00000  | 0.00000  | 0.00000  | 0.00000  | 0.00000  |
| 81  | C6 | S   | -0.00035 | -0.02231 | 0.00423  | -0.00236 | 0.01779  |
| 82  | C6 | S   | 0.05511  | -0.19606 | -0.07892 | 0.00874  | 0.54520  |
| 83  | C6 | PX  | 0.05306  | 0.16798  | 0.06233  | -0.08332 | 0.11214  |
| 84  | C6 | PY  | -0.09501 | -0.46294 | 0.09580  | 0.14460  | 0.22395  |
| 85  | C6 | PZ  | 0.00000  | 0.00000  | 0.00000  | 0.00000  | 0.00000  |
| 86  | C6 | S   | -0.95290 | 0.15908  | -0.19989 | -0.89825 | -0.93891 |
| 87  | C6 | PX  | -2.08402 | -0.24963 | -1.84162 | 0.21772  | -0.56176 |
| 88  | C6 | PY  | 1.42065  | 2.20170  | 0.41451  | -1.03758 | 0.42661  |
| 89  | C6 | PZ  | 0.00000  | 0.00000  | 0.00000  | 0.00000  | 0.00000  |
| 90  | C6 | DXX | 0.01524  | 0.06493  | 0.00229  | -0.04735 | 0.06447  |
| 91  | C6 | DYY | -0.04205 | -0.13524 | -0.03636 | 0.03031  | 0.02718  |
| 92  | C6 | DZZ | 0.00517  | 0.00523  | 0.01387  | 0.01421  | -0.01735 |
| 93  | C6 | DXY | -0.05356 | -0.05620 | -0.03953 | -0.05661 | 0.00923  |
| 94  | C6 | DXZ | 0.00000  | 0.00000  | 0.00000  | 0.00000  | 0.00000  |
| 95  | C6 | DYZ | 0.00000  | 0.00000  | 0.00000  | 0.00000  | 0.00000  |
| 96  | C7 | S   | -0.00840 | -0.00034 | -0.01532 | 0.01666  | -0.00271 |
| 97  | C7 | S   | -0.54378 | 0.12312  | -0.05757 | 0.24504  | 0.16078  |
| 98  | C7 | PX  | 0.22628  | -0.09855 | 0.10957  | -0.06683 | -0.03049 |
| 99  | C7 | PY  | 0.03857  | 0.16623  | 0.16741  | 0.02780  | -0.15762 |
| 100 | C7 | PZ  | 0.00000  | 0.00000  | 0.00000  | 0.00000  | 0.00000  |
| 101 | C7 | S   | 0.73761  | 0.04372  | -0.93031 | -0.52063 | -0.24779 |
| 102 | C7 | PX  | 0.25722  | 0.41346  | 0.20207  | 1.19984  | -0.42775 |
| 103 | C7 | PY  | 0.82272  | -1.43309 | -0.94841 | 0.56331  | -1.70423 |
| 104 | C7 | PZ  | 0.00000  | 0.00000  | 0.00000  | 0.00000  | 0.00000  |
| 105 | C7 | DXX | -0.10499 | -0.00547 | -0.02805 | -0.03168 | 0.05217  |
| 106 | C7 | DYY | 0.02021  | 0.02112  | -0.02540 | 0.08943  | -0.00955 |

|     |    |     |          |          |          |          |          |
|-----|----|-----|----------|----------|----------|----------|----------|
| 107 | C7 | DZZ | -0.00679 | -0.00613 | 0.02636  | -0.02722 | 0.00208  |
| 108 | C7 | DXY | -0.06936 | -0.00056 | 0.04233  | -0.00026 | 0.08102  |
| 109 | C7 | DXZ | 0.00000  | 0.00000  | 0.00000  | 0.00000  | 0.00000  |
| 110 | C7 | DYZ | 0.00000  | 0.00000  | 0.00000  | 0.00000  | 0.00000  |
| 111 | O1 | S   | 0.00936  | -0.01011 | 0.00257  | -0.00689 | 0.00796  |
| 112 | O1 | S   | -0.13271 | -0.14846 | 0.11623  | -0.09084 | -0.03382 |
| 113 | O1 | PX  | -0.01542 | -0.03818 | -0.03358 | -0.08543 | -0.20422 |
| 114 | O1 | PY  | 0.17242  | 0.28150  | -0.18753 | -0.14049 | 0.16030  |
| 115 | O1 | PZ  | 0.00000  | 0.00000  | 0.00000  | 0.00000  | 0.00000  |
| 116 | O1 | S   | -0.06742 | 0.46115  | -0.16238 | 0.56299  | -0.25144 |
| 117 | O1 | PX  | -0.28673 | -0.18563 | -0.02686 | -0.47662 | 0.23509  |
| 118 | O1 | PY  | 0.21259  | -0.86861 | 0.39587  | 0.26626  | -0.04301 |
| 119 | O1 | PZ  | 0.00000  | 0.00000  | 0.00000  | 0.00000  | 0.00000  |
| 120 | O1 | DXX | -0.00532 | -0.04312 | 0.00467  | 0.00704  | -0.06193 |
| 121 | O1 | DYY | -0.07358 | -0.05462 | 0.05149  | 0.01127  | 0.00927  |
| 122 | O1 | DZZ | -0.01254 | -0.01140 | 0.02639  | -0.09812 | 0.07172  |
| 123 | O1 | DXY | 0.02760  | 0.00124  | 0.03308  | -0.05112 | 0.02564  |
| 124 | O1 | DXZ | 0.00000  | 0.00000  | 0.00000  | 0.00000  | 0.00000  |
| 125 | O1 | DYZ | 0.00000  | 0.00000  | 0.00000  | 0.00000  | 0.00000  |
| 126 | H4 | S   | 0.24532  | -0.29586 | 0.03924  | -0.47545 | 0.32724  |
| 127 | H4 | S   | 0.07100  | -0.16563 | 0.19434  | -0.65234 | 0.43555  |
| 128 | H4 | PX  | -0.02593 | 0.00688  | 0.00500  | 0.00323  | 0.00089  |
| 129 | H4 | PY  | 0.00622  | -0.02287 | -0.00497 | 0.01825  | 0.03306  |
| 130 | H4 | PZ  | 0.00000  | 0.00000  | 0.00000  | 0.00000  | 0.00000  |
| 131 | N1 | S   | 0.00108  | 0.01638  | -0.00129 | -0.00857 | -0.01034 |
| 132 | N1 | S   | 0.13323  | -0.13317 | 0.12693  | -0.15497 | -0.22945 |
| 133 | N1 | PX  | 0.16654  | 0.19043  | 0.14532  | -0.19196 | -0.04724 |
| 134 | N1 | PY  | -0.05851 | -0.47065 | -0.19863 | -0.01248 | 0.06398  |
| 135 | N1 | PZ  | 0.00000  | 0.00000  | 0.00000  | 0.00000  | 0.00000  |
| 136 | N1 | S   | 0.66026  | -0.15586 | -0.03572 | 0.45536  | 0.09086  |
| 137 | N1 | PX  | -0.16932 | -1.13382 | 0.01918  | 0.54388  | -0.05230 |
| 138 | N1 | PY  | 0.36282  | 1.81563  | 0.12648  | -0.27014 | 0.65464  |
| 139 | N1 | PZ  | 0.00000  | 0.00000  | 0.00000  | 0.00000  | 0.00000  |
| 140 | N1 | DXX | 0.07098  | -0.06692 | 0.06500  | -0.01372 | -0.09706 |
| 141 | N1 | DYY | 0.03875  | 0.07078  | 0.02835  | -0.05620 | -0.04289 |
| 142 | N1 | DZZ | -0.02865 | -0.01287 | -0.01312 | 0.00056  | 0.00120  |
| 143 | N1 | DXY | 0.05557  | 0.02458  | -0.01846 | 0.00337  | 0.00416  |
| 144 | N1 | DXZ | 0.00000  | 0.00000  | 0.00000  | 0.00000  | 0.00000  |
| 145 | N1 | DYZ | 0.00000  | 0.00000  | 0.00000  | 0.00000  | 0.00000  |
| 146 | H6 | S   | -0.20019 | 0.22357  | 0.18740  | -0.05120 | -0.28056 |
| 147 | H6 | S   | -0.03485 | 0.12300  | 0.21197  | -0.20600 | -0.31056 |
| 148 | H6 | PX  | 0.01991  | 0.00059  | -0.00573 | -0.01344 | 0.00432  |
| 149 | H6 | PY  | 0.01688  | 0.00984  | 0.02623  | -0.02785 | 0.01954  |
| 150 | H6 | PZ  | 0.00000  | 0.00000  | 0.00000  | 0.00000  | 0.00000  |
| 151 | C8 | S   | -0.01295 | -0.00776 | 0.03698  | 0.00210  | 0.01444  |
| 152 | C8 | S   | -0.22683 | -0.19863 | 0.97491  | 0.08825  | 0.25837  |
| 153 | C8 | PX  | -0.00373 | 0.14467  | 0.18258  | -0.06063 | 0.27689  |
| 154 | C8 | PY  | 0.07710  | 0.04746  | -0.47018 | 0.06600  | -0.03778 |
| 155 | C8 | PZ  | 0.00000  | 0.00000  | 0.00000  | 0.00000  | 0.00000  |
| 156 | C8 | S   | 1.15944  | 1.06689  | -4.86905 | 0.30701  | -1.55296 |
| 157 | C8 | PX  | 0.60537  | -2.42147 | -0.60283 | 1.16673  | -2.57434 |
| 158 | C8 | PY  | 0.33020  | 0.96963  | 3.14729  | -0.44958 | -0.46389 |
| 159 | C8 | PZ  | 0.00000  | 0.00000  | 0.00000  | 0.00000  | 0.00000  |
| 160 | C8 | DXX | 0.00042  | 0.05795  | 0.10979  | -0.00720 | 0.00483  |

|     |     |     |          |          |          |          |          |
|-----|-----|-----|----------|----------|----------|----------|----------|
| 161 | C8  | DYY | -0.02017 | -0.01737 | -0.05661 | 0.03292  | 0.01504  |
| 162 | C8  | DZZ | 0.00422  | -0.01514 | 0.02788  | -0.01747 | 0.00093  |
| 163 | C8  | DXY | -0.06930 | -0.04073 | -0.00054 | 0.04317  | 0.02431  |
| 164 | C8  | DXZ | 0.00000  | 0.00000  | 0.00000  | 0.00000  | 0.00000  |
| 165 | C8  | DYZ | 0.00000  | 0.00000  | 0.00000  | 0.00000  | 0.00000  |
| 166 | H8  | S   | -0.10264 | -0.09844 | 0.04286  | -0.25029 | 0.12811  |
| 167 | H8  | S   | -0.13271 | -0.22347 | -0.00192 | -0.37853 | 0.14519  |
| 168 | H8  | PX  | -0.01951 | 0.00241  | -0.01309 | -0.01801 | 0.00531  |
| 169 | H8  | PY  | -0.02732 | -0.02821 | -0.00645 | -0.00310 | -0.01173 |
| 170 | H8  | PZ  | 0.00000  | 0.00000  | 0.00000  | 0.00000  | 0.00000  |
| 171 | C10 | S   | -0.00112 | -0.00484 | -0.03301 | 0.00252  | -0.00223 |
| 172 | C10 | S   | 0.22121  | 0.19612  | -1.07890 | -0.00060 | -0.18095 |
| 173 | C10 | PX  | -0.01205 | 0.10953  | 0.08257  | 0.05305  | -0.01913 |
| 174 | C10 | PY  | 0.06332  | 0.13894  | -0.17635 | -0.02165 | -0.02950 |
| 175 | C10 | PZ  | 0.00000  | 0.00000  | 0.00000  | 0.00000  | 0.00000  |
| 176 | C10 | S   | -0.54625 | 0.41071  | 5.52727  | -0.53744 | 0.79424  |
| 177 | C10 | PX  | -0.72910 | 0.20724  | -1.04782 | -0.47740 | 1.59106  |
| 178 | C10 | PY  | -0.23231 | 0.30781  | 2.01238  | -0.36103 | 0.53351  |
| 179 | C10 | PZ  | 0.00000  | 0.00000  | 0.00000  | 0.00000  | 0.00000  |
| 180 | C10 | DXX | 0.03701  | -0.02004 | -0.14916 | 0.03196  | -0.06231 |
| 181 | C10 | DYY | -0.04080 | 0.00116  | 0.06675  | -0.02337 | 0.06799  |
| 182 | C10 | DZZ | 0.02664  | 0.03501  | -0.02755 | -0.01638 | -0.02324 |
| 183 | C10 | DXY | -0.06463 | 0.02885  | -0.11032 | -0.03103 | 0.10139  |
| 184 | C10 | DXZ | 0.00000  | 0.00000  | 0.00000  | 0.00000  | 0.00000  |
| 185 | C10 | DYZ | 0.00000  | 0.00000  | 0.00000  | 0.00000  | 0.00000  |
| 186 | H16 | S   | 0.27649  | -0.02991 | 0.05870  | 0.07743  | -0.38380 |
| 187 | H16 | S   | 0.27556  | 0.07188  | -0.03491 | 0.13563  | -0.56041 |
| 188 | H16 | PX  | 0.00256  | -0.02207 | 0.01008  | -0.00446 | -0.00504 |
| 189 | H16 | PY  | -0.03580 | -0.01039 | -0.05071 | 0.00059  | 0.03778  |
| 190 | H16 | PZ  | 0.00000  | 0.00000  | 0.00000  | 0.00000  | 0.00000  |
| 191 | H18 | S   | -0.25564 | 0.03231  | -0.33475 | -0.06506 | 0.35519  |
| 192 | H18 | S   | -0.03152 | 0.13355  | -0.30006 | -0.19306 | 0.34519  |
| 193 | H18 | PX  | -0.00710 | -0.02096 | -0.01411 | -0.00383 | 0.00902  |
| 194 | H18 | PY  | 0.03849  | -0.00596 | -0.00588 | 0.00395  | -0.04558 |
| 195 | H18 | PZ  | 0.00000  | 0.00000  | 0.00000  | 0.00000  | 0.00000  |
| 196 | C9  | S   | 0.02871  | -0.03967 | -0.00292 | 0.00300  | -0.02296 |
| 197 | C9  | S   | 0.42319  | -0.52183 | -0.03550 | 0.18153  | -0.25532 |
| 198 | C9  | PX  | -0.07277 | 0.00895  | 0.02327  | -0.06194 | 0.04796  |
| 199 | C9  | PY  | 0.21236  | 0.15718  | -0.00358 | 0.15183  | 0.16303  |
| 200 | C9  | PZ  | 0.00000  | 0.00000  | 0.00000  | 0.00000  | 0.00000  |
| 201 | C9  | S   | -1.30888 | 1.56714  | -0.00297 | -0.54577 | 0.40380  |
| 202 | C9  | PX  | 0.24386  | -0.23462 | 0.10161  | 0.20459  | 0.07209  |
| 203 | C9  | PY  | -0.46923 | -0.23025 | -0.02020 | -0.35806 | -0.28556 |
| 204 | C9  | PZ  | 0.00000  | 0.00000  | 0.00000  | 0.00000  | 0.00000  |
| 205 | C9  | DXX | -0.00497 | -0.05236 | 0.02080  | -0.02768 | -0.04877 |
| 206 | C9  | DYY | 0.03582  | -0.03904 | -0.00053 | 0.04787  | -0.02202 |
| 207 | C9  | DZZ | 0.03291  | 0.01133  | -0.04497 | -0.02236 | -0.00267 |
| 208 | C9  | DXY | 0.05709  | 0.09287  | -0.06027 | -0.00158 | -0.00247 |
| 209 | C9  | DXZ | 0.00000  | 0.00000  | 0.00000  | 0.00000  | 0.00000  |
| 210 | C9  | DYZ | 0.00000  | 0.00000  | 0.00000  | 0.00000  | 0.00000  |
| 211 | H3  | S   | 0.06684  | -0.24692 | 0.01435  | -0.02269 | -0.07856 |
| 212 | H3  | S   | 0.58276  | -0.01640 | -0.03052 | 0.32685  | 0.14905  |
| 213 | H3  | PX  | 0.03864  | 0.06118  | -0.03495 | -0.00234 | 0.02210  |
| 214 | H3  | PY  | -0.02135 | -0.01105 | -0.00827 | -0.03345 | -0.01628 |

|     |    |    |          |          |          |          |          |
|-----|----|----|----------|----------|----------|----------|----------|
| 215 | H3 | PZ | 0.00000  | 0.00000  | 0.00000  | 0.00000  | 0.00000  |
| 216 | H5 | S  | 0.01183  | -0.16666 | -0.03465 | -0.08042 | -0.13525 |
| 217 | H5 | S  | 0.19060  | -0.23123 | -0.00305 | 0.11290  | -0.07953 |
| 218 | H5 | PX | -0.01352 | -0.02666 | 0.01724  | 0.00064  | -0.01634 |
| 219 | H5 | PY | 0.00174  | 0.00539  | -0.01336 | -0.00733 | -0.01217 |
| 220 | H5 | PZ | -0.01554 | -0.01834 | 0.01791  | 0.00143  | -0.00109 |
| 221 | H7 | S  | 0.01183  | -0.16666 | -0.03465 | -0.08042 | -0.13525 |
| 222 | H7 | S  | 0.19060  | -0.23123 | -0.00305 | 0.11290  | -0.07953 |
| 223 | H7 | PX | -0.01352 | -0.02666 | 0.01724  | 0.00064  | -0.01634 |
| 224 | H7 | PY | 0.00174  | 0.00539  | -0.01336 | -0.00733 | -0.01217 |
| 225 | H7 | PZ | 0.01554  | 0.01834  | -0.01791 | -0.00143 | 0.00109  |

|              |  |          |          |          |          |          |
|--------------|--|----------|----------|----------|----------|----------|
| MO:          |  | 116      | 117      | 118      | 119      | 120      |
| Eigenvalues: |  | 1.47318  | 1.48252  | 1.51650  | 1.55009  | 1.58637  |
| (ev):        |  | 40.08715 | 40.34143 | 41.26607 | 42.18025 | 43.16741 |

|    |    |     |          |          |          |          |          |
|----|----|-----|----------|----------|----------|----------|----------|
|    |    | A   | A        | A        | A        | A        |          |
| 1  | H1 | S   | 0.00000  | -0.08782 | -0.18463 | 0.00000  | 0.00000  |
| 2  | H1 | S   | 0.00000  | -0.14642 | -0.45293 | 0.00000  | 0.00000  |
| 3  | H1 | PX  | 0.00000  | 0.01095  | -0.02810 | 0.00000  | 0.00000  |
| 4  | H1 | PY  | 0.00000  | -0.00672 | -0.01599 | 0.00000  | 0.00000  |
| 5  | H1 | PZ  | 0.01441  | 0.00000  | 0.00000  | -0.11751 | 0.08260  |
| 6  | C1 | S   | 0.00000  | -0.01273 | 0.00339  | 0.00000  | 0.00000  |
| 7  | C1 | S   | 0.00000  | 0.00838  | 0.05028  | 0.00000  | 0.00000  |
| 8  | C1 | PX  | 0.00000  | -0.14005 | 0.00576  | 0.00000  | 0.00000  |
| 9  | C1 | PY  | 0.00000  | 0.02018  | 0.16580  | 0.00000  | 0.00000  |
| 10 | C1 | PZ  | -0.02292 | 0.00000  | 0.00000  | -0.08732 | 0.07378  |
| 11 | C1 | S   | 0.00000  | 0.89229  | -0.06489 | 0.00000  | 0.00000  |
| 12 | C1 | PX  | 0.00000  | 0.97679  | 1.03613  | 0.00000  | 0.00000  |
| 13 | C1 | PY  | 0.00000  | -2.31024 | -0.25144 | 0.00000  | 0.00000  |
| 14 | C1 | PZ  | 0.01278  | 0.00000  | 0.00000  | 0.06685  | -0.06528 |
| 15 | C1 | DXX | 0.00000  | -0.04013 | -0.00255 | 0.00000  | 0.00000  |
| 16 | C1 | DYY | 0.00000  | 0.01504  | 0.02318  | 0.00000  | 0.00000  |
| 17 | C1 | DZZ | 0.00000  | 0.02785  | -0.01948 | 0.00000  | 0.00000  |
| 18 | C1 | DXY | 0.00000  | -0.00663 | -0.03503 | 0.00000  | 0.00000  |
| 19 | C1 | DXZ | -0.04134 | 0.00000  | 0.00000  | -0.27508 | 0.15174  |
| 20 | C1 | DYZ | 0.29314  | 0.00000  | 0.00000  | -0.00356 | 0.19797  |
| 21 | C2 | S   | 0.00000  | 0.01542  | 0.01909  | 0.00000  | 0.00000  |
| 22 | C2 | S   | 0.00000  | 0.37280  | 0.28068  | 0.00000  | 0.00000  |
| 23 | C2 | PX  | 0.00000  | -0.02837 | 0.14259  | 0.00000  | 0.00000  |
| 24 | C2 | PY  | 0.00000  | -0.13622 | 0.04154  | 0.00000  | 0.00000  |
| 25 | C2 | PZ  | -0.01632 | 0.00000  | 0.00000  | -0.03230 | -0.06947 |
| 26 | C2 | S   | 0.00000  | -1.96039 | -0.82169 | 0.00000  | 0.00000  |
| 27 | C2 | PX  | 0.00000  | 0.51819  | -1.64223 | 0.00000  | 0.00000  |
| 28 | C2 | PY  | 0.00000  | 2.27039  | 0.68768  | 0.00000  | 0.00000  |
| 29 | C2 | PZ  | 0.02475  | 0.00000  | 0.00000  | -0.06969 | 0.01066  |
| 30 | C2 | DXX | 0.00000  | 0.11598  | -0.05272 | 0.00000  | 0.00000  |
| 31 | C2 | DYY | 0.00000  | -0.06735 | 0.06807  | 0.00000  | 0.00000  |
| 32 | C2 | DZZ | 0.00000  | 0.01648  | -0.01147 | 0.00000  | 0.00000  |
| 33 | C2 | DXY | 0.00000  | 0.05408  | 0.01380  | 0.00000  | 0.00000  |
| 34 | C2 | DXZ | -0.15032 | 0.00000  | 0.00000  | 0.16973  | 0.17053  |
| 35 | C2 | DYZ | 0.23215  | 0.00000  | 0.00000  | 0.08673  | 0.01933  |
| 36 | C3 | S   | 0.00000  | -0.02874 | 0.00934  | 0.00000  | 0.00000  |
| 37 | C3 | S   | 0.00000  | -0.26349 | 0.12225  | 0.00000  | 0.00000  |



|    |    |     |          |          |          |          |          |
|----|----|-----|----------|----------|----------|----------|----------|
| 38 | C3 | PX  | 0.00000  | 0.10225  | 0.12526  | 0.00000  | 0.00000  |
| 39 | C3 | PY  | 0.00000  | 0.26170  | 0.06411  | 0.00000  | 0.00000  |
| 40 | C3 | PZ  | -0.01522 | 0.00000  | 0.00000  | 0.03593  | -0.02248 |
| 41 | C3 | S   | 0.00000  | 0.06632  | -1.18154 | 0.00000  | 0.00000  |
| 42 | C3 | PX  | 0.00000  | -3.57130 | -1.05017 | 0.00000  | 0.00000  |
| 43 | C3 | PY  | 0.00000  | -1.98264 | 0.60807  | 0.00000  | 0.00000  |
| 44 | C3 | PZ  | -0.03168 | 0.00000  | 0.00000  | -0.05514 | -0.04242 |
| 45 | C3 | DXX | 0.00000  | -0.00570 | 0.01650  | 0.00000  | 0.00000  |
| 46 | C3 | DYY | 0.00000  | -0.08255 | -0.02201 | 0.00000  | 0.00000  |
| 47 | C3 | DZZ | 0.00000  | 0.06860  | -0.00750 | 0.00000  | 0.00000  |
| 48 | C3 | DXY | 0.00000  | 0.05538  | -0.02313 | 0.00000  | 0.00000  |
| 49 | C3 | DXZ | -0.17487 | 0.00000  | 0.00000  | -0.07999 | 0.05513  |
| 50 | C3 | DYZ | -0.28175 | 0.00000  | 0.00000  | 0.11874  | -0.18349 |
| 51 | C4 | S   | 0.00000  | 0.02017  | -0.00030 | 0.00000  | 0.00000  |
| 52 | C4 | S   | 0.00000  | 0.33722  | -0.14553 | 0.00000  | 0.00000  |
| 53 | C4 | PX  | 0.00000  | -0.26129 | 0.21157  | 0.00000  | 0.00000  |
| 54 | C4 | PY  | 0.00000  | -0.07400 | 0.05234  | 0.00000  | 0.00000  |
| 55 | C4 | PZ  | -0.04041 | 0.00000  | 0.00000  | 0.08178  | -0.03869 |
| 56 | C4 | S   | 0.00000  | -0.09336 | 0.67669  | 0.00000  | 0.00000  |
| 57 | C4 | PX  | 0.00000  | 2.38520  | -0.74554 | 0.00000  | 0.00000  |
| 58 | C4 | PY  | 0.00000  | 0.84262  | -0.77986 | 0.00000  | 0.00000  |
| 59 | C4 | PZ  | 0.06677  | 0.00000  | 0.00000  | -0.17715 | 0.04379  |
| 60 | C4 | DXX | 0.00000  | -0.01755 | -0.05110 | 0.00000  | 0.00000  |
| 61 | C4 | DYY | 0.00000  | 0.07168  | 0.01771  | 0.00000  | 0.00000  |
| 62 | C4 | DZZ | 0.00000  | 0.01036  | -0.00162 | 0.00000  | 0.00000  |
| 63 | C4 | DXY | 0.00000  | -0.03925 | -0.06524 | 0.00000  | 0.00000  |
| 64 | C4 | DXZ | 0.31383  | 0.00000  | 0.00000  | 0.14993  | 0.11573  |
| 65 | C4 | DYZ | 0.00070  | 0.00000  | 0.00000  | -0.27489 | 0.15813  |
| 66 | C5 | S   | 0.00000  | -0.02844 | 0.00109  | 0.00000  | 0.00000  |
| 67 | C5 | S   | 0.00000  | -0.61476 | 0.07941  | 0.00000  | 0.00000  |
| 68 | C5 | PX  | 0.00000  | -0.08086 | -0.13578 | 0.00000  | 0.00000  |
| 69 | C5 | PY  | 0.00000  | 0.13967  | -0.22160 | 0.00000  | 0.00000  |
| 70 | C5 | PZ  | -0.02849 | 0.00000  | 0.00000  | -0.06514 | 0.02648  |
| 71 | C5 | S   | 0.00000  | 1.52300  | -0.87181 | 0.00000  | 0.00000  |
| 72 | C5 | PX  | 0.00000  | 1.39936  | 0.63067  | 0.00000  | 0.00000  |
| 73 | C5 | PY  | 0.00000  | 0.40757  | 0.54516  | 0.00000  | 0.00000  |
| 74 | C5 | PZ  | 0.01838  | 0.00000  | 0.00000  | 0.14723  | -0.02610 |
| 75 | C5 | DXX | 0.00000  | -0.02453 | -0.08162 | 0.00000  | 0.00000  |
| 76 | C5 | DYY | 0.00000  | -0.07437 | 0.04546  | 0.00000  | 0.00000  |
| 77 | C5 | DZZ | 0.00000  | 0.03758  | 0.00890  | 0.00000  | 0.00000  |
| 78 | C5 | DXY | 0.00000  | -0.00459 | -0.01108 | 0.00000  | 0.00000  |
| 79 | C5 | DXZ | -0.23893 | 0.00000  | 0.00000  | 0.01188  | -0.07217 |
| 80 | C5 | DYZ | -0.14357 | 0.00000  | 0.00000  | -0.16385 | -0.04011 |
| 81 | C6 | S   | 0.00000  | 0.00261  | -0.00881 | 0.00000  | 0.00000  |
| 82 | C6 | S   | 0.00000  | 0.01590  | -0.28440 | 0.00000  | 0.00000  |
| 83 | C6 | PX  | 0.00000  | 0.44602  | 0.07520  | 0.00000  | 0.00000  |
| 84 | C6 | PY  | 0.00000  | 0.07638  | -0.00344 | 0.00000  | 0.00000  |
| 85 | C6 | PZ  | -0.00017 | 0.00000  | 0.00000  | 0.01945  | -0.02190 |
| 86 | C6 | S   | 0.00000  | -0.83586 | 2.61537  | 0.00000  | 0.00000  |
| 87 | C6 | PX  | 0.00000  | -4.12073 | -1.14317 | 0.00000  | 0.00000  |
| 88 | C6 | PY  | 0.00000  | -1.31299 | -0.02725 | 0.00000  | 0.00000  |
| 89 | C6 | PZ  | -0.03445 | 0.00000  | 0.00000  | 0.00997  | 0.17687  |
| 90 | C6 | DXX | 0.00000  | -0.05847 | -0.01710 | 0.00000  | 0.00000  |
| 91 | C6 | DYY | 0.00000  | 0.06805  | 0.06494  | 0.00000  | 0.00000  |

|     |    |     |          |          |          |          |          |
|-----|----|-----|----------|----------|----------|----------|----------|
| 92  | C6 | DZZ | 0.00000  | 0.00266  | -0.03797 | 0.00000  | 0.00000  |
| 93  | C6 | DXY | 0.00000  | -0.00211 | -0.00711 | 0.00000  | 0.00000  |
| 94  | C6 | DXZ | 0.31078  | 0.00000  | 0.00000  | -0.00408 | 0.01403  |
| 95  | C6 | DYZ | -0.10445 | 0.00000  | 0.00000  | 0.14200  | 0.17351  |
| 96  | C7 | S   | 0.00000  | -0.03367 | 0.00243  | 0.00000  | 0.00000  |
| 97  | C7 | S   | 0.00000  | -0.47307 | -0.02542 | 0.00000  | 0.00000  |
| 98  | C7 | PX  | 0.00000  | 0.02670  | 0.03286  | 0.00000  | 0.00000  |
| 99  | C7 | PY  | 0.00000  | -0.02595 | 0.15003  | 0.00000  | 0.00000  |
| 100 | C7 | PZ  | -0.08546 | 0.00000  | 0.00000  | 0.05583  | 0.00210  |
| 101 | C7 | S   | 0.00000  | 2.95027  | -0.16454 | 0.00000  | 0.00000  |
| 102 | C7 | PX  | 0.00000  | -1.97123 | -0.72901 | 0.00000  | 0.00000  |
| 103 | C7 | PY  | 0.00000  | 1.21623  | 1.31634  | 0.00000  | 0.00000  |
| 104 | C7 | PZ  | 0.12576  | 0.00000  | 0.00000  | 0.01426  | 0.02608  |
| 105 | C7 | DXX | 0.00000  | 0.02524  | 0.03164  | 0.00000  | 0.00000  |
| 106 | C7 | DYY | 0.00000  | -0.06441 | -0.03207 | 0.00000  | 0.00000  |
| 107 | C7 | DZZ | 0.00000  | 0.03761  | -0.00651 | 0.00000  | 0.00000  |
| 108 | C7 | DXY | 0.00000  | 0.03684  | -0.05798 | 0.00000  | 0.00000  |
| 109 | C7 | DXZ | -0.17653 | 0.00000  | 0.00000  | 0.20333  | 0.16607  |
| 110 | C7 | DYZ | 0.00947  | 0.00000  | 0.00000  | -0.00263 | 0.30802  |
| 111 | O1 | S   | 0.00000  | 0.00788  | 0.01135  | 0.00000  | 0.00000  |
| 112 | O1 | S   | 0.00000  | 0.08318  | 0.32579  | 0.00000  | 0.00000  |
| 113 | O1 | PX  | 0.00000  | -0.06796 | -0.32039 | 0.00000  | 0.00000  |
| 114 | O1 | PY  | 0.00000  | -0.11693 | -0.02427 | 0.00000  | 0.00000  |
| 115 | O1 | PZ  | 0.03363  | 0.00000  | 0.00000  | -0.00535 | -0.02675 |
| 116 | O1 | S   | 0.00000  | -0.39512 | -0.80203 | 0.00000  | 0.00000  |
| 117 | O1 | PX  | 0.00000  | 0.04954  | 0.54989  | 0.00000  | 0.00000  |
| 118 | O1 | PY  | 0.00000  | 0.52694  | -0.08493 | 0.00000  | 0.00000  |
| 119 | O1 | PZ  | -0.08111 | 0.00000  | 0.00000  | 0.03999  | 0.01845  |
| 120 | O1 | DXX | 0.00000  | 0.01944  | -0.05517 | 0.00000  | 0.00000  |
| 121 | O1 | DYY | 0.00000  | 0.03686  | 0.18331  | 0.00000  | 0.00000  |
| 122 | O1 | DZZ | 0.00000  | 0.01127  | 0.17000  | 0.00000  | 0.00000  |
| 123 | O1 | DXY | 0.00000  | 0.01406  | 0.09160  | 0.00000  | 0.00000  |
| 124 | O1 | DXZ | 0.09819  | 0.00000  | 0.00000  | 0.22434  | -0.06201 |
| 125 | O1 | DYZ | -0.01206 | 0.00000  | 0.00000  | 0.18480  | -0.11423 |
| 126 | H4 | S   | 0.00000  | -0.01906 | 0.01572  | 0.00000  | 0.00000  |
| 127 | H4 | S   | 0.00000  | 0.09988  | 0.14194  | 0.00000  | 0.00000  |
| 128 | H4 | PX  | 0.00000  | -0.00440 | 0.02638  | 0.00000  | 0.00000  |
| 129 | H4 | PY  | 0.00000  | -0.00847 | 0.04530  | 0.00000  | 0.00000  |
| 130 | H4 | PZ  | 0.02329  | 0.00000  | 0.00000  | -0.03184 | 0.01175  |
| 131 | N1 | S   | 0.00000  | 0.00499  | -0.00029 | 0.00000  | 0.00000  |
| 132 | N1 | S   | 0.00000  | -0.05220 | 0.19890  | 0.00000  | 0.00000  |
| 133 | N1 | PX  | 0.00000  | 0.15540  | -0.04241 | 0.00000  | 0.00000  |
| 134 | N1 | PY  | 0.00000  | 0.06462  | 0.18471  | 0.00000  | 0.00000  |
| 135 | N1 | PZ  | -0.08639 | 0.00000  | 0.00000  | 0.02514  | 0.11935  |
| 136 | N1 | S   | 0.00000  | 0.21684  | 0.09867  | 0.00000  | 0.00000  |
| 137 | N1 | PX  | 0.00000  | 1.07664  | 0.75849  | 0.00000  | 0.00000  |
| 138 | N1 | PY  | 0.00000  | -0.36650 | -1.34838 | 0.00000  | 0.00000  |
| 139 | N1 | PZ  | 0.10906  | 0.00000  | 0.00000  | 0.03950  | -0.21204 |
| 140 | N1 | DXX | 0.00000  | 0.01755  | 0.07674  | 0.00000  | 0.00000  |
| 141 | N1 | DYY | 0.00000  | -0.03361 | -0.00139 | 0.00000  | 0.00000  |
| 142 | N1 | DZZ | 0.00000  | -0.00920 | -0.00362 | 0.00000  | 0.00000  |
| 143 | N1 | DXY | 0.00000  | -0.03906 | 0.01802  | 0.00000  | 0.00000  |
| 144 | N1 | DXZ | 0.12709  | 0.00000  | 0.00000  | -0.04521 | 0.08837  |
| 145 | N1 | DYZ | 0.03649  | 0.00000  | 0.00000  | -0.10084 | -0.18932 |

|     |     |     |          |          |          |          |          |
|-----|-----|-----|----------|----------|----------|----------|----------|
| 146 | H6  | S   | 0.00000  | 0.44127  | -0.27131 | 0.00000  | 0.00000  |
| 147 | H6  | S   | 0.00000  | 0.64761  | -0.44334 | 0.00000  | 0.00000  |
| 148 | H6  | PX  | 0.00000  | -0.01031 | 0.00784  | 0.00000  | 0.00000  |
| 149 | H6  | PY  | 0.00000  | 0.01662  | 0.00692  | 0.00000  | 0.00000  |
| 150 | H6  | PZ  | 0.02663  | 0.00000  | 0.00000  | -0.09168 | -0.07751 |
| 151 | C8  | S   | 0.00000  | -0.00675 | -0.01918 | 0.00000  | 0.00000  |
| 152 | C8  | S   | 0.00000  | -0.25678 | -0.39393 | 0.00000  | 0.00000  |
| 153 | C8  | PX  | 0.00000  | -0.02738 | -0.28421 | 0.00000  | 0.00000  |
| 154 | C8  | PY  | 0.00000  | 0.49280  | -0.00613 | 0.00000  | 0.00000  |
| 155 | C8  | PZ  | 0.09840  | 0.00000  | 0.00000  | -0.02193 | -0.03054 |
| 156 | C8  | S   | 0.00000  | 1.66880  | 1.03196  | 0.00000  | 0.00000  |
| 157 | C8  | PX  | 0.00000  | 1.13347  | 2.67054  | 0.00000  | 0.00000  |
| 158 | C8  | PY  | 0.00000  | -5.16351 | -0.10548 | 0.00000  | 0.00000  |
| 159 | C8  | PZ  | -0.25281 | 0.00000  | 0.00000  | 0.00271  | 0.05986  |
| 160 | C8  | DXX | 0.00000  | 0.01707  | -0.07091 | 0.00000  | 0.00000  |
| 161 | C8  | DYY | 0.00000  | 0.00383  | 0.00527  | 0.00000  | 0.00000  |
| 162 | C8  | DZZ | 0.00000  | -0.02351 | 0.00752  | 0.00000  | 0.00000  |
| 163 | C8  | DXY | 0.00000  | -0.00380 | -0.01113 | 0.00000  | 0.00000  |
| 164 | C8  | DXZ | -0.05024 | 0.00000  | 0.00000  | -0.04037 | -0.30991 |
| 165 | C8  | DYZ | 0.17028  | 0.00000  | 0.00000  | -0.17197 | -0.29148 |
| 166 | H8  | S   | 0.00000  | 0.39283  | 0.27531  | 0.00000  | 0.00000  |
| 167 | H8  | S   | 0.00000  | 0.46221  | 0.29571  | 0.00000  | 0.00000  |
| 168 | H8  | PX  | 0.00000  | 0.04420  | 0.01949  | 0.00000  | 0.00000  |
| 169 | H8  | PY  | 0.00000  | 0.02648  | 0.00131  | 0.00000  | 0.00000  |
| 170 | H8  | PZ  | -0.05269 | 0.00000  | 0.00000  | 0.09510  | 0.06850  |
| 171 | C10 | S   | 0.00000  | 0.02675  | 0.00991  | 0.00000  | 0.00000  |
| 172 | C10 | S   | 0.00000  | 0.48292  | 0.22643  | 0.00000  | 0.00000  |
| 173 | C10 | PX  | 0.00000  | -0.10146 | -0.04485 | 0.00000  | 0.00000  |
| 174 | C10 | PY  | 0.00000  | -0.12374 | 0.01771  | 0.00000  | 0.00000  |
| 175 | C10 | PZ  | 0.03771  | 0.00000  | 0.00000  | -0.03569 | -0.07560 |
| 176 | C10 | S   | 0.00000  | -5.21792 | -1.18906 | 0.00000  | 0.00000  |
| 177 | C10 | PX  | 0.00000  | 1.00218  | -0.99507 | 0.00000  | 0.00000  |
| 178 | C10 | PY  | 0.00000  | -1.79957 | -0.68970 | 0.00000  | 0.00000  |
| 179 | C10 | PZ  | 0.08093  | 0.00000  | 0.00000  | 0.00039  | 0.02784  |
| 180 | C10 | DXX | 0.00000  | 0.11203  | 0.07041  | 0.00000  | 0.00000  |
| 181 | C10 | DYY | 0.00000  | -0.07848 | -0.04028 | 0.00000  | 0.00000  |
| 182 | C10 | DZZ | 0.00000  | 0.00462  | -0.00129 | 0.00000  | 0.00000  |
| 183 | C10 | DXY | 0.00000  | 0.09450  | -0.05431 | 0.00000  | 0.00000  |
| 184 | C10 | DXZ | 0.02290  | 0.00000  | 0.00000  | -0.06703 | -0.24496 |
| 185 | C10 | DYZ | -0.12798 | 0.00000  | 0.00000  | 0.10269  | 0.13597  |
| 186 | H16 | S   | 0.00000  | -0.02979 | 0.22555  | 0.00000  | 0.00000  |
| 187 | H16 | S   | 0.00000  | -0.09285 | 0.35553  | 0.00000  | 0.00000  |
| 188 | H16 | PX  | 0.00000  | 0.00215  | 0.01012  | 0.00000  | 0.00000  |
| 189 | H16 | PY  | 0.00000  | 0.03988  | -0.01138 | 0.00000  | 0.00000  |
| 190 | H16 | PZ  | 0.03855  | 0.00000  | 0.00000  | -0.04625 | -0.12173 |
| 191 | H18 | S   | 0.00000  | 0.16163  | -0.18783 | 0.00000  | 0.00000  |
| 192 | H18 | S   | 0.00000  | 0.32557  | -0.26038 | 0.00000  | 0.00000  |
| 193 | H18 | PX  | 0.00000  | 0.01469  | 0.00827  | 0.00000  | 0.00000  |
| 194 | H18 | PY  | 0.00000  | 0.03037  | 0.02777  | 0.00000  | 0.00000  |
| 195 | H18 | PZ  | 0.03894  | 0.00000  | 0.00000  | -0.01582 | 0.02604  |
| 196 | C9  | S   | 0.00000  | 0.01583  | -0.07446 | 0.00000  | 0.00000  |
| 197 | C9  | S   | 0.00000  | 0.15677  | -0.86602 | 0.00000  | 0.00000  |
| 198 | C9  | PX  | 0.00000  | -0.00084 | 0.14417  | 0.00000  | 0.00000  |
| 199 | C9  | PY  | 0.00000  | 0.02899  | 0.12143  | 0.00000  | 0.00000  |

|     |    |     |          |          |          |          |          |
|-----|----|-----|----------|----------|----------|----------|----------|
| 200 | C9 | PZ  | -0.02747 | 0.00000  | 0.00000  | -0.09547 | 0.03879  |
| 201 | C9 | S   | 0.00000  | -0.65592 | 2.03324  | 0.00000  | 0.00000  |
| 202 | C9 | PX  | 0.00000  | 0.23361  | -0.10311 | 0.00000  | 0.00000  |
| 203 | C9 | PY  | 0.00000  | 0.02708  | -0.38281 | 0.00000  | 0.00000  |
| 204 | C9 | PZ  | 0.08071  | 0.00000  | 0.00000  | 0.07012  | -0.03646 |
| 205 | C9 | DXX | 0.00000  | -0.00470 | 0.04141  | 0.00000  | 0.00000  |
| 206 | C9 | DYY | 0.00000  | 0.01423  | -0.09504 | 0.00000  | 0.00000  |
| 207 | C9 | DZZ | 0.00000  | -0.00133 | -0.13518 | 0.00000  | 0.00000  |
| 208 | C9 | DXY | 0.00000  | -0.04078 | -0.16760 | 0.00000  | 0.00000  |
| 209 | C9 | DXZ | -0.01109 | 0.00000  | 0.00000  | -0.18024 | 0.08911  |
| 210 | C9 | DYZ | -0.08439 | 0.00000  | 0.00000  | -0.31562 | 0.11805  |
| 211 | H3 | S   | 0.00000  | 0.05394  | -0.17260 | 0.00000  | 0.00000  |
| 212 | H3 | S   | 0.00000  | 0.09573  | -0.15368 | 0.00000  | 0.00000  |
| 213 | H3 | PX  | 0.00000  | -0.01687 | -0.06643 | 0.00000  | 0.00000  |
| 214 | H3 | PY  | 0.00000  | -0.00688 | -0.02551 | 0.00000  | 0.00000  |
| 215 | H3 | PZ  | -0.03139 | 0.00000  | 0.00000  | -0.12400 | 0.04508  |
| 216 | H5 | S   | -0.03411 | 0.05138  | -0.31806 | -0.05220 | 0.01346  |
| 217 | H5 | S   | 0.10458  | 0.02931  | -0.25321 | 0.05400  | -0.00641 |
| 218 | H5 | PX  | 0.00671  | 0.00335  | 0.02968  | 0.04712  | -0.02090 |
| 219 | H5 | PY  | 0.02557  | -0.01017 | -0.04046 | 0.11720  | -0.04792 |
| 220 | H5 | PZ  | -0.00093 | 0.00308  | 0.05033  | 0.01370  | -0.00840 |
| 221 | H7 | S   | 0.03411  | 0.05138  | -0.31806 | 0.05220  | -0.01346 |
| 222 | H7 | S   | -0.10458 | 0.02931  | -0.25321 | -0.05400 | 0.00641  |
| 223 | H7 | PX  | -0.00671 | 0.00335  | 0.02968  | -0.04712 | 0.02090  |
| 224 | H7 | PY  | -0.02557 | -0.01017 | -0.04046 | -0.11720 | 0.04792  |
| 225 | H7 | PZ  | -0.00093 | -0.00308 | -0.05033 | 0.01370  | -0.00840 |

|              |  |          |          |          |          |          |
|--------------|--|----------|----------|----------|----------|----------|
| MO:          |  | 121      | 122      | 123      | 124      | 125      |
| Eigenvalues: |  | 1.59404  | 1.61346  | 1.61640  | 1.62192  | 1.65269  |
| (ev):        |  | 43.37592 | 43.90445 | 43.98446 | 44.13471 | 44.97201 |

|    |    |     |          |         |          |          |          |
|----|----|-----|----------|---------|----------|----------|----------|
|    |    | A   | A        | A       | A        | A        |          |
| 1  | H1 | S   | 0.09575  | 0.00000 | 0.00000  | 0.19006  | 0.00000  |
| 2  | H1 | S   | 0.37753  | 0.00000 | 0.00000  | 0.33977  | 0.00000  |
| 3  | H1 | PX  | 0.00275  | 0.00000 | 0.00000  | 0.00030  | 0.00000  |
| 4  | H1 | PY  | 0.01825  | 0.00000 | 0.00000  | 0.02519  | 0.00000  |
| 5  | H1 | PZ  | 0.00000  | 0.08068 | -0.03023 | 0.00000  | 0.05313  |
| 6  | C1 | S   | 0.00474  | 0.00000 | 0.00000  | -0.02553 | 0.00000  |
| 7  | C1 | S   | 0.07641  | 0.00000 | 0.00000  | -0.61363 | 0.00000  |
| 8  | C1 | PX  | -0.00689 | 0.00000 | 0.00000  | 0.13378  | 0.00000  |
| 9  | C1 | PY  | -0.15941 | 0.00000 | 0.00000  | 0.34206  | 0.00000  |
| 10 | C1 | PZ  | 0.00000  | 0.04663 | 0.00865  | 0.00000  | 0.04059  |
| 11 | C1 | S   | 0.81296  | 0.00000 | 0.00000  | 2.67700  | 0.00000  |
| 12 | C1 | PX  | -1.32952 | 0.00000 | 0.00000  | -2.02282 | 0.00000  |
| 13 | C1 | PY  | 1.06198  | 0.00000 | 0.00000  | 0.78028  | 0.00000  |
| 14 | C1 | PZ  | 0.00000  | 0.03317 | -0.14884 | 0.00000  | -0.02787 |
| 15 | C1 | DXX | 0.02690  | 0.00000 | 0.00000  | 0.00844  | 0.00000  |
| 16 | C1 | DYY | -0.02672 | 0.00000 | 0.00000  | -0.05480 | 0.00000  |
| 17 | C1 | DZZ | 0.02604  | 0.00000 | 0.00000  | 0.01063  | 0.00000  |
| 18 | C1 | DXY | 0.02899  | 0.00000 | 0.00000  | -0.02796 | 0.00000  |
| 19 | C1 | DXZ | 0.00000  | 0.12198 | -0.03284 | 0.00000  | 0.10268  |
| 20 | C1 | DYZ | 0.00000  | 0.11215 | 0.10835  | 0.00000  | 0.03693  |
| 21 | C2 | S   | -0.03994 | 0.00000 | 0.00000  | -0.01722 | 0.00000  |
| 22 | C2 | S   | -0.42550 | 0.00000 | 0.00000  | -0.24960 | 0.00000  |

|    |    |     |          |          |          |          |          |
|----|----|-----|----------|----------|----------|----------|----------|
| 23 | C2 | PX  | 0.11652  | 0.00000  | 0.00000  | 0.00965  | 0.00000  |
| 24 | C2 | PY  | -0.26918 | 0.00000  | 0.00000  | -0.08074 | 0.00000  |
| 25 | C2 | PZ  | 0.00000  | 0.00944  | 0.06114  | 0.00000  | -0.13061 |
| 26 | C2 | S   | 3.98461  | 0.00000  | 0.00000  | 1.62680  | 0.00000  |
| 27 | C2 | PX  | 0.88766  | 0.00000  | 0.00000  | 1.75042  | 0.00000  |
| 28 | C2 | PY  | -0.70818 | 0.00000  | 0.00000  | -0.33118 | 0.00000  |
| 29 | C2 | PZ  | 0.00000  | 0.01936  | -0.13113 | 0.00000  | 0.13479  |
| 30 | C2 | DXX | -0.07065 | 0.00000  | 0.00000  | 0.06191  | 0.00000  |
| 31 | C2 | DYY | 0.02613  | 0.00000  | 0.00000  | -0.07212 | 0.00000  |
| 32 | C2 | DZZ | 0.06334  | 0.00000  | 0.00000  | 0.01756  | 0.00000  |
| 33 | C2 | DXY | -0.05533 | 0.00000  | 0.00000  | -0.05481 | 0.00000  |
| 34 | C2 | DXZ | 0.00000  | 0.08080  | -0.12659 | 0.00000  | 0.31113  |
| 35 | C2 | DYZ | 0.00000  | -0.21229 | -0.07953 | 0.00000  | 0.29282  |
| 36 | C3 | S   | -0.02335 | 0.00000  | 0.00000  | 0.00334  | 0.00000  |
| 37 | C3 | S   | -0.66182 | 0.00000  | 0.00000  | -0.05597 | 0.00000  |
| 38 | C3 | PX  | -0.12925 | 0.00000  | 0.00000  | -0.20781 | 0.00000  |
| 39 | C3 | PY  | 0.14171  | 0.00000  | 0.00000  | -0.02446 | 0.00000  |
| 40 | C3 | PZ  | 0.00000  | 0.00621  | -0.07787 | 0.00000  | -0.00718 |
| 41 | C3 | S   | 1.77081  | 0.00000  | 0.00000  | -0.86062 | 0.00000  |
| 42 | C3 | PX  | 2.10930  | 0.00000  | 0.00000  | -0.16274 | 0.00000  |
| 43 | C3 | PY  | -0.80570 | 0.00000  | 0.00000  | 2.05898  | 0.00000  |
| 44 | C3 | PZ  | 0.00000  | -0.09981 | 0.21609  | 0.00000  | 0.05309  |
| 45 | C3 | DXX | -0.10731 | 0.00000  | 0.00000  | 0.02896  | 0.00000  |
| 46 | C3 | DYY | 0.00512  | 0.00000  | 0.00000  | -0.05203 | 0.00000  |
| 47 | C3 | DZZ | 0.03197  | 0.00000  | 0.00000  | -0.00274 | 0.00000  |
| 48 | C3 | DXY | -0.07846 | 0.00000  | 0.00000  | 0.00088  | 0.00000  |
| 49 | C3 | DXZ | 0.00000  | 0.19361  | 0.26701  | 0.00000  | 0.10823  |
| 50 | C3 | DYZ | 0.00000  | -0.25568 | -0.14257 | 0.00000  | -0.11419 |
| 51 | C4 | S   | 0.00550  | 0.00000  | 0.00000  | 0.02325  | 0.00000  |
| 52 | C4 | S   | 0.10796  | 0.00000  | 0.00000  | 0.57120  | 0.00000  |
| 53 | C4 | PX  | -0.05979 | 0.00000  | 0.00000  | 0.17627  | 0.00000  |
| 54 | C4 | PY  | -0.16301 | 0.00000  | 0.00000  | 0.00920  | 0.00000  |
| 55 | C4 | PZ  | 0.00000  | 0.02397  | -0.04088 | 0.00000  | 0.02167  |
| 56 | C4 | S   | -0.74268 | 0.00000  | 0.00000  | -3.44493 | 0.00000  |
| 57 | C4 | PX  | -0.79513 | 0.00000  | 0.00000  | -2.11494 | 0.00000  |
| 58 | C4 | PY  | 1.59422  | 0.00000  | 0.00000  | 1.48722  | 0.00000  |
| 59 | C4 | PZ  | 0.00000  | -0.05492 | 0.15044  | 0.00000  | -0.08939 |
| 60 | C4 | DXX | -0.05759 | 0.00000  | 0.00000  | 0.02869  | 0.00000  |
| 61 | C4 | DYY | 0.06716  | 0.00000  | 0.00000  | -0.04689 | 0.00000  |
| 62 | C4 | DZZ | 0.03492  | 0.00000  | 0.00000  | 0.02972  | 0.00000  |
| 63 | C4 | DXY | 0.02864  | 0.00000  | 0.00000  | 0.04213  | 0.00000  |
| 64 | C4 | DXZ | 0.00000  | -0.18199 | 0.17558  | 0.00000  | -0.05776 |
| 65 | C4 | DYZ | 0.00000  | -0.19898 | 0.01242  | 0.00000  | -0.05699 |
| 66 | C5 | S   | 0.00593  | 0.00000  | 0.00000  | -0.00790 | 0.00000  |
| 67 | C5 | S   | 0.29171  | 0.00000  | 0.00000  | -0.27414 | 0.00000  |
| 68 | C5 | PX  | -0.02978 | 0.00000  | 0.00000  | 0.03791  | 0.00000  |
| 69 | C5 | PY  | -0.08931 | 0.00000  | 0.00000  | 0.23805  | 0.00000  |
| 70 | C5 | PZ  | 0.00000  | -0.02999 | 0.02586  | 0.00000  | -0.12164 |
| 71 | C5 | S   | -1.23552 | 0.00000  | 0.00000  | -0.26385 | 0.00000  |
| 72 | C5 | PX  | 0.14771  | 0.00000  | 0.00000  | -0.08808 | 0.00000  |
| 73 | C5 | PY  | 0.08422  | 0.00000  | 0.00000  | -1.53091 | 0.00000  |
| 74 | C5 | PZ  | 0.00000  | 0.07151  | 0.02509  | 0.00000  | 0.07037  |
| 75 | C5 | DXX | 0.01089  | 0.00000  | 0.00000  | 0.01515  | 0.00000  |
| 76 | C5 | DYY | -0.08443 | 0.00000  | 0.00000  | -0.02825 | 0.00000  |

|     |    |     |          |          |          |          |          |
|-----|----|-----|----------|----------|----------|----------|----------|
| 77  | C5 | DZZ | 0.08840  | 0.00000  | 0.00000  | 0.01831  | 0.00000  |
| 78  | C5 | DXY | -0.03279 | 0.00000  | 0.00000  | -0.03576 | 0.00000  |
| 79  | C5 | DXZ | 0.00000  | 0.27326  | -0.17727 | 0.00000  | 0.20991  |
| 80  | C5 | DYZ | 0.00000  | 0.11413  | 0.10400  | 0.00000  | -0.42656 |
| 81  | C6 | S   | -0.02462 | 0.00000  | 0.00000  | 0.01870  | 0.00000  |
| 82  | C6 | S   | -0.01856 | 0.00000  | 0.00000  | 0.51618  | 0.00000  |
| 83  | C6 | PX  | -0.33853 | 0.00000  | 0.00000  | 0.01425  | 0.00000  |
| 84  | C6 | PY  | 0.05950  | 0.00000  | 0.00000  | 0.39563  | 0.00000  |
| 85  | C6 | PZ  | 0.00000  | 0.02933  | -0.06391 | 0.00000  | 0.04874  |
| 86  | C6 | S   | -1.50151 | 0.00000  | 0.00000  | -0.34211 | 0.00000  |
| 87  | C6 | PX  | 4.29752  | 0.00000  | 0.00000  | 0.69139  | 0.00000  |
| 88  | C6 | PY  | -0.52547 | 0.00000  | 0.00000  | -4.58544 | 0.00000  |
| 89  | C6 | PZ  | 0.00000  | -0.02343 | 0.10147  | 0.00000  | -0.19072 |
| 90  | C6 | DXX | -0.04510 | 0.00000  | 0.00000  | 0.05809  | 0.00000  |
| 91  | C6 | DYY | -0.13249 | 0.00000  | 0.00000  | 0.05911  | 0.00000  |
| 92  | C6 | DZZ | 0.12138  | 0.00000  | 0.00000  | -0.01036 | 0.00000  |
| 93  | C6 | DXY | -0.04779 | 0.00000  | 0.00000  | -0.00634 | 0.00000  |
| 94  | C6 | DXZ | 0.00000  | -0.12372 | -0.23039 | 0.00000  | -0.04035 |
| 95  | C6 | DYZ | 0.00000  | 0.00782  | -0.23515 | 0.00000  | -0.01556 |
| 96  | C7 | S   | 0.04294  | 0.00000  | 0.00000  | 0.01093  | 0.00000  |
| 97  | C7 | S   | 0.87913  | 0.00000  | 0.00000  | 0.15276  | 0.00000  |
| 98  | C7 | PX  | -0.30296 | 0.00000  | 0.00000  | -0.06227 | 0.00000  |
| 99  | C7 | PY  | 0.05853  | 0.00000  | 0.00000  | 0.18749  | 0.00000  |
| 100 | C7 | PZ  | 0.00000  | -0.12939 | -0.03763 | 0.00000  | -0.06717 |
| 101 | C7 | S   | -3.17298 | 0.00000  | 0.00000  | -0.36802 | 0.00000  |
| 102 | C7 | PX  | 1.66306  | 0.00000  | 0.00000  | -1.02146 | 0.00000  |
| 103 | C7 | PY  | -1.08869 | 0.00000  | 0.00000  | 1.49627  | 0.00000  |
| 104 | C7 | PZ  | 0.00000  | 0.11411  | -0.10983 | 0.00000  | 0.03266  |
| 105 | C7 | DXX | 0.01359  | 0.00000  | 0.00000  | 0.08682  | 0.00000  |
| 106 | C7 | DYY | 0.07803  | 0.00000  | 0.00000  | -0.01212 | 0.00000  |
| 107 | C7 | DZZ | -0.02225 | 0.00000  | 0.00000  | -0.02495 | 0.00000  |
| 108 | C7 | DXY | 0.06458  | 0.00000  | 0.00000  | -0.03009 | 0.00000  |
| 109 | C7 | DXZ | 0.00000  | -0.23926 | -0.09780 | 0.00000  | -0.16006 |
| 110 | C7 | DYZ | 0.00000  | 0.21556  | 0.19637  | 0.00000  | 0.03836  |
| 111 | O1 | S   | 0.01245  | 0.00000  | 0.00000  | -0.00651 | 0.00000  |
| 112 | O1 | S   | 0.24692  | 0.00000  | 0.00000  | -0.32537 | 0.00000  |
| 113 | O1 | PX  | -0.15803 | 0.00000  | 0.00000  | 0.05196  | 0.00000  |
| 114 | O1 | PY  | -0.12095 | 0.00000  | 0.00000  | 0.22619  | 0.00000  |
| 115 | O1 | PZ  | 0.00000  | 0.08026  | 0.08117  | 0.00000  | -0.09152 |
| 116 | O1 | S   | -0.81533 | 0.00000  | 0.00000  | 0.40048  | 0.00000  |
| 117 | O1 | PX  | 0.65286  | 0.00000  | 0.00000  | 0.01762  | 0.00000  |
| 118 | O1 | PY  | 0.62486  | 0.00000  | 0.00000  | -0.49346 | 0.00000  |
| 119 | O1 | PZ  | 0.00000  | -0.09829 | -0.18473 | 0.00000  | 0.21018  |
| 120 | O1 | DXX | 0.00870  | 0.00000  | 0.00000  | -0.08860 | 0.00000  |
| 121 | O1 | DYY | 0.08699  | 0.00000  | 0.00000  | -0.12674 | 0.00000  |
| 122 | O1 | DZZ | 0.10222  | 0.00000  | 0.00000  | -0.01333 | 0.00000  |
| 123 | O1 | DXY | 0.04579  | 0.00000  | 0.00000  | -0.04422 | 0.00000  |
| 124 | O1 | DXZ | 0.00000  | 0.09742  | 0.11261  | 0.00000  | -0.11148 |
| 125 | O1 | DYZ | 0.00000  | 0.18084  | -0.02053 | 0.00000  | 0.04013  |
| 126 | H4 | S   | 0.09353  | 0.00000  | 0.00000  | 0.27617  | 0.00000  |
| 127 | H4 | S   | 0.24432  | 0.00000  | 0.00000  | 0.36697  | 0.00000  |
| 128 | H4 | PX  | 0.01284  | 0.00000  | 0.00000  | -0.01635 | 0.00000  |
| 129 | H4 | PY  | 0.02368  | 0.00000  | 0.00000  | -0.00541 | 0.00000  |
| 130 | H4 | PZ  | 0.00000  | -0.03392 | 0.10175  | 0.00000  | -0.21909 |

|     |     |     |          |          |          |          |          |
|-----|-----|-----|----------|----------|----------|----------|----------|
| 131 | N1  | S   | 0.01768  | 0.00000  | 0.00000  | -0.01095 | 0.00000  |
| 132 | N1  | S   | 0.22352  | 0.00000  | 0.00000  | -0.16738 | 0.00000  |
| 133 | N1  | PX  | 0.28947  | 0.00000  | 0.00000  | -0.05972 | 0.00000  |
| 134 | N1  | PY  | -0.30668 | 0.00000  | 0.00000  | -0.13101 | 0.00000  |
| 135 | N1  | PZ  | 0.00000  | 0.00957  | 0.01985  | 0.00000  | -0.03010 |
| 136 | N1  | S   | -0.72675 | 0.00000  | 0.00000  | -0.00524 | 0.00000  |
| 137 | N1  | PX  | -2.05956 | 0.00000  | 0.00000  | 1.10488  | 0.00000  |
| 138 | N1  | PY  | 1.97029  | 0.00000  | 0.00000  | -1.52354 | 0.00000  |
| 139 | N1  | PZ  | 0.00000  | -0.09672 | -0.09268 | 0.00000  | 0.15308  |
| 140 | N1  | DXX | 0.06950  | 0.00000  | 0.00000  | 0.03105  | 0.00000  |
| 141 | N1  | DYY | 0.04567  | 0.00000  | 0.00000  | -0.10394 | 0.00000  |
| 142 | N1  | DZZ | 0.01829  | 0.00000  | 0.00000  | -0.00233 | 0.00000  |
| 143 | N1  | DXY | -0.01297 | 0.00000  | 0.00000  | -0.02197 | 0.00000  |
| 144 | N1  | DXZ | 0.00000  | 0.13890  | -0.22683 | 0.00000  | -0.14300 |
| 145 | N1  | DYZ | 0.00000  | -0.03000 | 0.19902  | 0.00000  | 0.05750  |
| 146 | H6  | S   | -0.08203 | 0.00000  | 0.00000  | 0.22272  | 0.00000  |
| 147 | H6  | S   | -0.09791 | 0.00000  | 0.00000  | 0.41118  | 0.00000  |
| 148 | H6  | PX  | -0.01508 | 0.00000  | 0.00000  | -0.02603 | 0.00000  |
| 149 | H6  | PY  | 0.01849  | 0.00000  | 0.00000  | 0.00146  | 0.00000  |
| 150 | H6  | PZ  | 0.00000  | 0.00839  | 0.03933  | 0.00000  | -0.17751 |
| 151 | C8  | S   | -0.00598 | 0.00000  | 0.00000  | 0.00363  | 0.00000  |
| 152 | C8  | S   | -0.33847 | 0.00000  | 0.00000  | -0.10439 | 0.00000  |
| 153 | C8  | PX  | -0.14843 | 0.00000  | 0.00000  | -0.42052 | 0.00000  |
| 154 | C8  | PY  | 0.24590  | 0.00000  | 0.00000  | -0.12760 | 0.00000  |
| 155 | C8  | PZ  | 0.00000  | -0.00025 | 0.00206  | 0.00000  | 0.01487  |
| 156 | C8  | S   | 4.66409  | 0.00000  | 0.00000  | -0.46778 | 0.00000  |
| 157 | C8  | PX  | -0.48555 | 0.00000  | 0.00000  | 4.19037  | 0.00000  |
| 158 | C8  | PY  | -2.42023 | 0.00000  | 0.00000  | -0.61509 | 0.00000  |
| 159 | C8  | PZ  | 0.00000  | 0.05116  | 0.03948  | 0.00000  | -0.05813 |
| 160 | C8  | DXX | 0.13408  | 0.00000  | 0.00000  | -0.03253 | 0.00000  |
| 161 | C8  | DYY | 0.00970  | 0.00000  | 0.00000  | 0.00243  | 0.00000  |
| 162 | C8  | DZZ | -0.05847 | 0.00000  | 0.00000  | -0.00483 | 0.00000  |
| 163 | C8  | DXY | -0.00296 | 0.00000  | 0.00000  | 0.02288  | 0.00000  |
| 164 | C8  | DXZ | 0.00000  | -0.18830 | 0.21489  | 0.00000  | 0.17922  |
| 165 | C8  | DYZ | 0.00000  | 0.14818  | -0.24245 | 0.00000  | -0.00763 |
| 166 | H8  | S   | -0.05948 | 0.00000  | 0.00000  | 0.28969  | 0.00000  |
| 167 | H8  | S   | -0.37519 | 0.00000  | 0.00000  | 0.46272  | 0.00000  |
| 168 | H8  | PX  | 0.00688  | 0.00000  | 0.00000  | 0.03794  | 0.00000  |
| 169 | H8  | PY  | 0.00949  | 0.00000  | 0.00000  | 0.02801  | 0.00000  |
| 170 | H8  | PZ  | 0.00000  | -0.11371 | -0.09007 | 0.00000  | -0.08871 |
| 171 | C10 | S   | 0.02357  | 0.00000  | 0.00000  | 0.00379  | 0.00000  |
| 172 | C10 | S   | 0.20734  | 0.00000  | 0.00000  | -0.05387 | 0.00000  |
| 173 | C10 | PX  | 0.17708  | 0.00000  | 0.00000  | 0.04937  | 0.00000  |
| 174 | C10 | PY  | -0.16403 | 0.00000  | 0.00000  | -0.08448 | 0.00000  |
| 175 | C10 | PZ  | 0.00000  | 0.05374  | -0.12503 | 0.00000  | -0.01707 |
| 176 | C10 | S   | -3.47738 | 0.00000  | 0.00000  | -0.90100 | 0.00000  |
| 177 | C10 | PX  | -0.13079 | 0.00000  | 0.00000  | -2.01979 | 0.00000  |
| 178 | C10 | PY  | -1.27698 | 0.00000  | 0.00000  | -0.72432 | 0.00000  |
| 179 | C10 | PZ  | 0.00000  | -0.04213 | 0.08305  | 0.00000  | 0.02400  |
| 180 | C10 | DXX | 0.05661  | 0.00000  | 0.00000  | 0.06576  | 0.00000  |
| 181 | C10 | DYY | -0.10340 | 0.00000  | 0.00000  | -0.05031 | 0.00000  |
| 182 | C10 | DZZ | 0.02859  | 0.00000  | 0.00000  | -0.01399 | 0.00000  |
| 183 | C10 | DXY | 0.00768  | 0.00000  | 0.00000  | -0.11250 | 0.00000  |
| 184 | C10 | DXZ | 0.00000  | -0.05821 | 0.07444  | 0.00000  | 0.17803  |

|     |     |     |          |          |          |          |          |
|-----|-----|-----|----------|----------|----------|----------|----------|
| 185 | C10 | DYZ | 0.00000  | -0.16112 | 0.29843  | 0.00000  | 0.08638  |
| 186 | H16 | S   | 0.20316  | 0.00000  | 0.00000  | 0.35243  | 0.00000  |
| 187 | H16 | S   | 0.24297  | 0.00000  | 0.00000  | 0.66018  | 0.00000  |
| 188 | H16 | PX  | -0.03008 | 0.00000  | 0.00000  | 0.00646  | 0.00000  |
| 189 | H16 | PY  | -0.00974 | 0.00000  | 0.00000  | -0.02432 | 0.00000  |
| 190 | H16 | PZ  | 0.00000  | 0.00571  | -0.01791 | 0.00000  | 0.06747  |
| 191 | H18 | S   | 0.02753  | 0.00000  | 0.00000  | -0.36491 | 0.00000  |
| 192 | H18 | S   | -0.05436 | 0.00000  | 0.00000  | -0.61253 | 0.00000  |
| 193 | H18 | PX  | -0.02509 | 0.00000  | 0.00000  | -0.00506 | 0.00000  |
| 194 | H18 | PY  | 0.02110  | 0.00000  | 0.00000  | 0.03963  | 0.00000  |
| 195 | H18 | PZ  | 0.00000  | 0.06861  | -0.11634 | 0.00000  | -0.08782 |
| 196 | C9  | S   | 0.02099  | 0.00000  | 0.00000  | -0.01785 | 0.00000  |
| 197 | C9  | S   | 0.24938  | 0.00000  | 0.00000  | -0.19406 | 0.00000  |
| 198 | C9  | PX  | 0.07987  | 0.00000  | 0.00000  | -0.02146 | 0.00000  |
| 199 | C9  | PY  | -0.10217 | 0.00000  | 0.00000  | 0.10038  | 0.00000  |
| 200 | C9  | PZ  | 0.00000  | -0.07901 | -0.02089 | 0.00000  | 0.03135  |
| 201 | C9  | S   | -0.99438 | 0.00000  | 0.00000  | 0.50418  | 0.00000  |
| 202 | C9  | PX  | 0.15071  | 0.00000  | 0.00000  | -0.02249 | 0.00000  |
| 203 | C9  | PY  | 0.48180  | 0.00000  | 0.00000  | -0.37956 | 0.00000  |
| 204 | C9  | PZ  | 0.00000  | 0.15109  | 0.10365  | 0.00000  | -0.15807 |
| 205 | C9  | DXX | 0.03950  | 0.00000  | 0.00000  | -0.08100 | 0.00000  |
| 206 | C9  | DYY | -0.03588 | 0.00000  | 0.00000  | 0.00994  | 0.00000  |
| 207 | C9  | DZZ | 0.00458  | 0.00000  | 0.00000  | 0.05416  | 0.00000  |
| 208 | C9  | DXY | -0.12616 | 0.00000  | 0.00000  | 0.10487  | 0.00000  |
| 209 | C9  | DXZ | 0.00000  | -0.12700 | -0.04172 | 0.00000  | 0.04991  |
| 210 | C9  | DYZ | 0.00000  | -0.19626 | -0.09076 | 0.00000  | 0.10099  |
| 211 | H3  | S   | 0.07140  | 0.00000  | 0.00000  | -0.00130 | 0.00000  |
| 212 | H3  | S   | -0.11404 | 0.00000  | 0.00000  | 0.14681  | 0.00000  |
| 213 | H3  | PX  | -0.06477 | 0.00000  | 0.00000  | 0.07705  | 0.00000  |
| 214 | H3  | PY  | 0.00572  | 0.00000  | 0.00000  | 0.00484  | 0.00000  |
| 215 | H3  | PZ  | 0.00000  | -0.07445 | -0.02772 | 0.00000  | 0.02531  |
| 216 | H5  | S   | 0.12546  | -0.04399 | 0.00366  | -0.08564 | -0.00742 |
| 217 | H5  | S   | 0.09300  | 0.10690  | 0.04996  | -0.08509 | -0.08160 |
| 218 | H5  | PX  | 0.01502  | 0.03259  | 0.01346  | -0.03284 | -0.01971 |
| 219 | H5  | PY  | -0.00360 | 0.07551  | 0.02630  | 0.00023  | -0.03387 |
| 220 | H5  | PZ  | 0.01961  | 0.01051  | 0.00471  | -0.02299 | -0.00702 |
| 221 | H7  | S   | 0.12546  | 0.04399  | -0.00366 | -0.08564 | 0.00742  |
| 222 | H7  | S   | 0.09300  | -0.10690 | -0.04996 | -0.08509 | 0.08160  |
| 223 | H7  | PX  | 0.01502  | -0.03259 | -0.01346 | -0.03284 | 0.01971  |
| 224 | H7  | PY  | -0.00360 | -0.07551 | -0.02630 | 0.00023  | 0.03387  |
| 225 | H7  | PZ  | -0.01961 | 0.01051  | 0.00471  | 0.02299  | -0.00702 |

|              |          |          |          |          |          |
|--------------|----------|----------|----------|----------|----------|
| MO:          | 126      | 127      | 128      | 129      | 130      |
| Eigenvalues: | 1.66549  | 1.68081  | 1.68528  | 1.70352  | 1.71993  |
| (ev):        | 45.32025 | 45.73720 | 45.85883 | 46.35520 | 46.80183 |

|   |    |    |          |          |          |         |          |
|---|----|----|----------|----------|----------|---------|----------|
|   |    | A  | A        | A        | A        | A       |          |
| 1 | H1 | S  | 0.16851  | 0.00000  | 0.55819  | 0.00000 | 0.00000  |
| 2 | H1 | S  | 0.18463  | 0.00000  | 1.07200  | 0.00000 | 0.00000  |
| 3 | H1 | PX | -0.01046 | 0.00000  | 0.02693  | 0.00000 | 0.00000  |
| 4 | H1 | PY | 0.02803  | 0.00000  | 0.01841  | 0.00000 | 0.00000  |
| 5 | H1 | PZ | 0.00000  | -0.03610 | 0.00000  | 0.04791 | -0.15354 |
| 6 | C1 | S  | 0.04540  | 0.00000  | -0.00356 | 0.00000 | 0.00000  |
| 7 | C1 | S  | 0.76507  | 0.00000  | -0.26109 | 0.00000 | 0.00000  |



|    |    |     |          |          |          |          |          |
|----|----|-----|----------|----------|----------|----------|----------|
| 8  | C1 | PX  | -0.05190 | 0.00000  | 0.18168  | 0.00000  | 0.00000  |
| 9  | C1 | PY  | -0.13805 | 0.00000  | -0.00799 | 0.00000  | 0.00000  |
| 10 | C1 | PZ  | 0.00000  | 0.01762  | 0.00000  | 0.00043  | -0.16004 |
| 11 | C1 | S   | -5.05081 | 0.00000  | -0.31330 | 0.00000  | 0.00000  |
| 12 | C1 | PX  | 0.41693  | 0.00000  | -2.97723 | 0.00000  | 0.00000  |
| 13 | C1 | PY  | 1.27707  | 0.00000  | 0.62287  | 0.00000  | 0.00000  |
| 14 | C1 | PZ  | 0.00000  | -0.15417 | 0.00000  | 0.04643  | 0.24269  |
| 15 | C1 | DXX | 0.05354  | 0.00000  | 0.09130  | 0.00000  | 0.00000  |
| 16 | C1 | DYY | 0.05468  | 0.00000  | -0.10491 | 0.00000  | 0.00000  |
| 17 | C1 | DZZ | -0.06250 | 0.00000  | 0.02380  | 0.00000  | 0.00000  |
| 18 | C1 | DXY | 0.07426  | 0.00000  | 0.04491  | 0.00000  | 0.00000  |
| 19 | C1 | DXZ | 0.00000  | 0.00019  | 0.00000  | -0.02568 | -0.36026 |
| 20 | C1 | DYZ | 0.00000  | 0.00305  | 0.00000  | 0.22613  | 0.06477  |
| 21 | C2 | S   | 0.02364  | 0.00000  | -0.01561 | 0.00000  | 0.00000  |
| 22 | C2 | S   | 0.48565  | 0.00000  | -0.43786 | 0.00000  | 0.00000  |
| 23 | C2 | PX  | 0.03204  | 0.00000  | -0.19584 | 0.00000  | 0.00000  |
| 24 | C2 | PY  | 0.15841  | 0.00000  | 0.05151  | 0.00000  | 0.00000  |
| 25 | C2 | PZ  | 0.00000  | -0.09710 | 0.00000  | 0.04184  | -0.03846 |
| 26 | C2 | S   | -2.29989 | 0.00000  | 1.56749  | 0.00000  | 0.00000  |
| 27 | C2 | PX  | -1.62578 | 0.00000  | 1.99916  | 0.00000  | 0.00000  |
| 28 | C2 | PY  | -0.66699 | 0.00000  | 1.16861  | 0.00000  | 0.00000  |
| 29 | C2 | PZ  | 0.00000  | 0.14598  | 0.00000  | 0.04918  | 0.00739  |
| 30 | C2 | DXX | -0.00907 | 0.00000  | -0.04783 | 0.00000  | 0.00000  |
| 31 | C2 | DYY | 0.01439  | 0.00000  | -0.01606 | 0.00000  | 0.00000  |
| 32 | C2 | DZZ | -0.02447 | 0.00000  | 0.04487  | 0.00000  | 0.00000  |
| 33 | C2 | DXY | 0.00505  | 0.00000  | 0.09884  | 0.00000  | 0.00000  |
| 34 | C2 | DXZ | 0.00000  | 0.31183  | 0.00000  | -0.05631 | 0.08238  |
| 35 | C2 | DYZ | 0.00000  | -0.12785 | 0.00000  | -0.17700 | -0.08315 |
| 36 | C3 | S   | -0.00610 | 0.00000  | 0.01911  | 0.00000  | 0.00000  |
| 37 | C3 | S   | -0.48581 | 0.00000  | 0.21190  | 0.00000  | 0.00000  |
| 38 | C3 | PX  | -0.44044 | 0.00000  | -0.45149 | 0.00000  | 0.00000  |
| 39 | C3 | PY  | 0.12484  | 0.00000  | -0.23514 | 0.00000  | 0.00000  |
| 40 | C3 | PZ  | 0.00000  | -0.02844 | 0.00000  | -0.04338 | 0.05506  |
| 41 | C3 | S   | 2.01149  | 0.00000  | -0.50347 | 0.00000  | 0.00000  |
| 42 | C3 | PX  | 4.31556  | 0.00000  | 3.72735  | 0.00000  | 0.00000  |
| 43 | C3 | PY  | 0.30181  | 0.00000  | 0.96192  | 0.00000  | 0.00000  |
| 44 | C3 | PZ  | 0.00000  | 0.19802  | 0.00000  | 0.11123  | -0.13586 |
| 45 | C3 | DXX | -0.01375 | 0.00000  | 0.09158  | 0.00000  | 0.00000  |
| 46 | C3 | DYY | 0.08572  | 0.00000  | -0.03850 | 0.00000  | 0.00000  |
| 47 | C3 | DZZ | -0.08712 | 0.00000  | -0.01424 | 0.00000  | 0.00000  |
| 48 | C3 | DXY | -0.01797 | 0.00000  | -0.01645 | 0.00000  | 0.00000  |
| 49 | C3 | DXZ | 0.00000  | 0.06161  | 0.00000  | -0.28310 | 0.12367  |
| 50 | C3 | DYZ | 0.00000  | 0.06696  | 0.00000  | -0.19199 | 0.02329  |
| 51 | C4 | S   | -0.04221 | 0.00000  | 0.00504  | 0.00000  | 0.00000  |
| 52 | C4 | S   | -0.84244 | 0.00000  | 0.01445  | 0.00000  | 0.00000  |
| 53 | C4 | PX  | -0.05393 | 0.00000  | -0.29679 | 0.00000  | 0.00000  |
| 54 | C4 | PY  | 0.33044  | 0.00000  | -0.08075 | 0.00000  | 0.00000  |
| 55 | C4 | PZ  | 0.00000  | -0.02370 | 0.00000  | -0.00872 | -0.01564 |
| 56 | C4 | S   | 2.18340  | 0.00000  | -0.74310 | 0.00000  | 0.00000  |
| 57 | C4 | PX  | 0.96231  | 0.00000  | 0.07850  | 0.00000  | 0.00000  |
| 58 | C4 | PY  | -2.67242 | 0.00000  | 0.99082  | 0.00000  | 0.00000  |
| 59 | C4 | PZ  | 0.00000  | 0.14134  | 0.00000  | -0.11106 | -0.21071 |
| 60 | C4 | DXX | -0.01010 | 0.00000  | -0.02502 | 0.00000  | 0.00000  |
| 61 | C4 | DYY | -0.07620 | 0.00000  | 0.03641  | 0.00000  | 0.00000  |

|     |    |     |          |          |          |          |          |
|-----|----|-----|----------|----------|----------|----------|----------|
| 62  | C4 | DZZ | 0.00891  | 0.00000  | 0.01933  | 0.00000  | 0.00000  |
| 63  | C4 | DXY | -0.03385 | 0.00000  | 0.04246  | 0.00000  | 0.00000  |
| 64  | C4 | DXZ | 0.00000  | 0.23641  | 0.00000  | -0.05608 | 0.20100  |
| 65  | C4 | DYZ | 0.00000  | 0.23815  | 0.00000  | -0.18295 | -0.28085 |
| 66  | C5 | S   | -0.00044 | 0.00000  | 0.01362  | 0.00000  | 0.00000  |
| 67  | C5 | S   | -0.04449 | 0.00000  | 0.48267  | 0.00000  | 0.00000  |
| 68  | C5 | PX  | -0.04661 | 0.00000  | 0.21643  | 0.00000  | 0.00000  |
| 69  | C5 | PY  | 0.00841  | 0.00000  | -0.12449 | 0.00000  | 0.00000  |
| 70  | C5 | PZ  | 0.00000  | 0.06272  | 0.00000  | 0.05693  | 0.06988  |
| 71  | C5 | S   | 0.98274  | 0.00000  | -1.87787 | 0.00000  | 0.00000  |
| 72  | C5 | PX  | -0.09947 | 0.00000  | -1.32521 | 0.00000  | 0.00000  |
| 73  | C5 | PY  | -0.14455 | 0.00000  | 1.97502  | 0.00000  | 0.00000  |
| 74  | C5 | PZ  | 0.00000  | -0.07582 | 0.00000  | -0.03948 | -0.01080 |
| 75  | C5 | DXX | -0.03972 | 0.00000  | 0.00679  | 0.00000  | 0.00000  |
| 76  | C5 | DYY | 0.06818  | 0.00000  | -0.05002 | 0.00000  | 0.00000  |
| 77  | C5 | DZZ | -0.04106 | 0.00000  | 0.05021  | 0.00000  | 0.00000  |
| 78  | C5 | DXY | 0.02109  | 0.00000  | 0.05809  | 0.00000  | 0.00000  |
| 79  | C5 | DXZ | 0.00000  | -0.21220 | 0.00000  | 0.07592  | -0.13301 |
| 80  | C5 | DYZ | 0.00000  | 0.05872  | 0.00000  | 0.19930  | 0.00958  |
| 81  | C6 | S   | -0.03509 | 0.00000  | -0.00234 | 0.00000  | 0.00000  |
| 82  | C6 | S   | -0.55143 | 0.00000  | -0.02906 | 0.00000  | 0.00000  |
| 83  | C6 | PX  | 0.03515  | 0.00000  | 0.30693  | 0.00000  | 0.00000  |
| 84  | C6 | PY  | -0.03055 | 0.00000  | -0.19651 | 0.00000  | 0.00000  |
| 85  | C6 | PZ  | 0.00000  | 0.09108  | 0.00000  | 0.04003  | 0.00979  |
| 86  | C6 | S   | 4.30492  | 0.00000  | 2.09993  | 0.00000  | 0.00000  |
| 87  | C6 | PX  | 1.03298  | 0.00000  | 0.03805  | 0.00000  | 0.00000  |
| 88  | C6 | PY  | 1.92582  | 0.00000  | 0.59630  | 0.00000  | 0.00000  |
| 89  | C6 | PZ  | 0.00000  | -0.27570 | 0.00000  | -0.19614 | 0.02813  |
| 90  | C6 | DXX | 0.01207  | 0.00000  | 0.02885  | 0.00000  | 0.00000  |
| 91  | C6 | DYY | 0.00973  | 0.00000  | -0.02396 | 0.00000  | 0.00000  |
| 92  | C6 | DZZ | -0.04125 | 0.00000  | 0.01520  | 0.00000  | 0.00000  |
| 93  | C6 | DXY | -0.00233 | 0.00000  | 0.08731  | 0.00000  | 0.00000  |
| 94  | C6 | DXZ | 0.00000  | -0.24472 | 0.00000  | 0.16066  | -0.21843 |
| 95  | C6 | DYZ | 0.00000  | 0.31873  | 0.00000  | 0.27281  | -0.01027 |
| 96  | C7 | S   | 0.03038  | 0.00000  | 0.00455  | 0.00000  | 0.00000  |
| 97  | C7 | S   | 0.31190  | 0.00000  | -0.11458 | 0.00000  | 0.00000  |
| 98  | C7 | PX  | 0.05111  | 0.00000  | 0.06413  | 0.00000  | 0.00000  |
| 99  | C7 | PY  | 0.05040  | 0.00000  | -0.03923 | 0.00000  | 0.00000  |
| 100 | C7 | PZ  | 0.00000  | -0.05267 | 0.00000  | -0.00388 | -0.04755 |
| 101 | C7 | S   | -3.33786 | 0.00000  | -1.63008 | 0.00000  | 0.00000  |
| 102 | C7 | PX  | -1.12820 | 0.00000  | -0.79721 | 0.00000  | 0.00000  |
| 103 | C7 | PY  | -1.41535 | 0.00000  | -0.98191 | 0.00000  | 0.00000  |
| 104 | C7 | PZ  | 0.00000  | -0.00968 | 0.00000  | 0.02749  | 0.05590  |
| 105 | C7 | DXX | 0.12773  | 0.00000  | 0.01494  | 0.00000  | 0.00000  |
| 106 | C7 | DYY | -0.06154 | 0.00000  | -0.04505 | 0.00000  | 0.00000  |
| 107 | C7 | DZZ | -0.05582 | 0.00000  | 0.02754  | 0.00000  | 0.00000  |
| 108 | C7 | DXY | 0.03187  | 0.00000  | -0.03045 | 0.00000  | 0.00000  |
| 109 | C7 | DXZ | 0.00000  | -0.16577 | 0.00000  | -0.02829 | -0.09718 |
| 110 | C7 | DYZ | 0.00000  | -0.07806 | 0.00000  | -0.03983 | 0.03474  |
| 111 | O1 | S   | -0.00445 | 0.00000  | 0.00508  | 0.00000  | 0.00000  |
| 112 | O1 | S   | -0.00541 | 0.00000  | 0.14400  | 0.00000  | 0.00000  |
| 113 | O1 | PX  | 0.27309  | 0.00000  | -0.20443 | 0.00000  | 0.00000  |
| 114 | O1 | PY  | -0.05340 | 0.00000  | -0.08577 | 0.00000  | 0.00000  |
| 115 | O1 | PZ  | 0.00000  | 0.03963  | 0.00000  | -0.04553 | -0.14717 |

|     |    |     |          |          |          |          |          |
|-----|----|-----|----------|----------|----------|----------|----------|
| 116 | O1 | S   | 0.62886  | 0.00000  | -0.40346 | 0.00000  | 0.00000  |
| 117 | O1 | PX  | -0.91614 | 0.00000  | 0.58216  | 0.00000  | 0.00000  |
| 118 | O1 | PY  | -0.32952 | 0.00000  | 0.46321  | 0.00000  | 0.00000  |
| 119 | O1 | PZ  | 0.00000  | -0.20498 | 0.00000  | 0.21113  | 0.48525  |
| 120 | O1 | DXX | 0.14052  | 0.00000  | -0.01589 | 0.00000  | 0.00000  |
| 121 | O1 | DYY | -0.01799 | 0.00000  | 0.07859  | 0.00000  | 0.00000  |
| 122 | O1 | DZZ | -0.13660 | 0.00000  | 0.06038  | 0.00000  | 0.00000  |
| 123 | O1 | DXY | -0.08382 | 0.00000  | 0.02354  | 0.00000  | 0.00000  |
| 124 | O1 | DXZ | 0.00000  | 0.15044  | 0.00000  | -0.13134 | -0.24789 |
| 125 | O1 | DYZ | 0.00000  | -0.21699 | 0.00000  | 0.19028  | 0.23218  |
| 126 | H4 | S   | 0.01274  | 0.00000  | -0.40492 | 0.00000  | 0.00000  |
| 127 | H4 | S   | -0.10272 | 0.00000  | -0.68887 | 0.00000  | 0.00000  |
| 128 | H4 | PX  | -0.01679 | 0.00000  | 0.02244  | 0.00000  | 0.00000  |
| 129 | H4 | PY  | -0.02763 | 0.00000  | -0.00429 | 0.00000  | 0.00000  |
| 130 | H4 | PZ  | 0.00000  | 0.10626  | 0.00000  | 0.05104  | 0.07204  |
| 131 | N1 | S   | -0.00144 | 0.00000  | 0.01859  | 0.00000  | 0.00000  |
| 132 | N1 | S   | 0.24132  | 0.00000  | 0.24913  | 0.00000  | 0.00000  |
| 133 | N1 | PX  | 0.08803  | 0.00000  | 0.08288  | 0.00000  | 0.00000  |
| 134 | N1 | PY  | 0.09550  | 0.00000  | -0.01921 | 0.00000  | 0.00000  |
| 135 | N1 | PZ  | 0.00000  | 0.06906  | 0.00000  | 0.07580  | 0.00775  |
| 136 | N1 | S   | 0.26317  | 0.00000  | -1.22721 | 0.00000  | 0.00000  |
| 137 | N1 | PX  | -0.18513 | 0.00000  | -0.47734 | 0.00000  | 0.00000  |
| 138 | N1 | PY  | -0.10857 | 0.00000  | -0.37986 | 0.00000  | 0.00000  |
| 139 | N1 | PZ  | 0.00000  | 0.09586  | 0.00000  | 0.18203  | -0.08186 |
| 140 | N1 | DXX | 0.06157  | 0.00000  | 0.02550  | 0.00000  | 0.00000  |
| 141 | N1 | DYY | 0.02927  | 0.00000  | 0.05359  | 0.00000  | 0.00000  |
| 142 | N1 | DZZ | -0.01743 | 0.00000  | 0.03698  | 0.00000  | 0.00000  |
| 143 | N1 | DXY | -0.00381 | 0.00000  | 0.02339  | 0.00000  | 0.00000  |
| 144 | N1 | DXZ | 0.00000  | -0.07818 | 0.00000  | -0.13478 | 0.00765  |
| 145 | N1 | DYZ | 0.00000  | -0.18977 | 0.00000  | -0.23836 | 0.03466  |
| 146 | H6 | S   | -0.20573 | 0.00000  | 0.44840  | 0.00000  | 0.00000  |
| 147 | H6 | S   | -0.40230 | 0.00000  | 0.70990  | 0.00000  | 0.00000  |
| 148 | H6 | PX  | 0.01897  | 0.00000  | -0.02913 | 0.00000  | 0.00000  |
| 149 | H6 | PY  | 0.01211  | 0.00000  | -0.01835 | 0.00000  | 0.00000  |
| 150 | H6 | PZ  | 0.00000  | -0.12707 | 0.00000  | 0.08013  | -0.04197 |
| 151 | C8 | S   | -0.01494 | 0.00000  | -0.00553 | 0.00000  | 0.00000  |
| 152 | C8 | S   | -0.45188 | 0.00000  | -0.15027 | 0.00000  | 0.00000  |
| 153 | C8 | PX  | -0.20067 | 0.00000  | -0.07846 | 0.00000  | 0.00000  |
| 154 | C8 | PY  | 0.01900  | 0.00000  | -0.25835 | 0.00000  | 0.00000  |
| 155 | C8 | PZ  | 0.00000  | -0.01881 | 0.00000  | 0.00997  | -0.01181 |
| 156 | C8 | S   | 1.51665  | 0.00000  | -0.87062 | 0.00000  | 0.00000  |
| 157 | C8 | PX  | 0.88938  | 0.00000  | -0.63612 | 0.00000  | 0.00000  |
| 158 | C8 | PY  | -0.96385 | 0.00000  | 2.61431  | 0.00000  | 0.00000  |
| 159 | C8 | PZ  | 0.00000  | 0.06505  | 0.00000  | -0.15390 | 0.09643  |
| 160 | C8 | DXX | -0.01248 | 0.00000  | -0.06189 | 0.00000  | 0.00000  |
| 161 | C8 | DYY | 0.02131  | 0.00000  | -0.05819 | 0.00000  | 0.00000  |
| 162 | C8 | DZZ | -0.03501 | 0.00000  | 0.08308  | 0.00000  | 0.00000  |
| 163 | C8 | DXY | -0.01535 | 0.00000  | -0.03544 | 0.00000  | 0.00000  |
| 164 | C8 | DXZ | 0.00000  | 0.05771  | 0.00000  | 0.12164  | -0.04495 |
| 165 | C8 | DYZ | 0.00000  | 0.18734  | 0.00000  | -0.11047 | 0.10135  |
| 166 | H8 | S   | 0.53355  | 0.00000  | 0.33972  | 0.00000  | 0.00000  |
| 167 | H8 | S   | 0.65196  | 0.00000  | 0.37525  | 0.00000  | 0.00000  |
| 168 | H8 | PX  | 0.02354  | 0.00000  | 0.02375  | 0.00000  | 0.00000  |
| 169 | H8 | PY  | -0.03144 | 0.00000  | -0.03759 | 0.00000  | 0.00000  |

|     |     |     |          |          |          |          |          |
|-----|-----|-----|----------|----------|----------|----------|----------|
| 170 | H8  | PZ  | 0.00000  | -0.08865 | 0.00000  | -0.00180 | -0.05100 |
| 171 | C10 | S   | 0.01676  | 0.00000  | -0.00979 | 0.00000  | 0.00000  |
| 172 | C10 | S   | 0.21621  | 0.00000  | -0.03738 | 0.00000  | 0.00000  |
| 173 | C10 | PX  | 0.02475  | 0.00000  | -0.02328 | 0.00000  | 0.00000  |
| 174 | C10 | PY  | -0.01604 | 0.00000  | 0.13591  | 0.00000  | 0.00000  |
| 175 | C10 | PZ  | 0.00000  | 0.07767  | 0.00000  | -0.02960 | 0.03710  |
| 176 | C10 | S   | -1.71725 | 0.00000  | 2.25270  | 0.00000  | 0.00000  |
| 177 | C10 | PX  | -0.42307 | 0.00000  | -0.30762 | 0.00000  | 0.00000  |
| 178 | C10 | PY  | -0.90127 | 0.00000  | 0.86479  | 0.00000  | 0.00000  |
| 179 | C10 | PZ  | 0.00000  | -0.08985 | 0.00000  | 0.05705  | -0.05958 |
| 180 | C10 | DXX | 0.07442  | 0.00000  | -0.06617 | 0.00000  | 0.00000  |
| 181 | C10 | DYY | -0.03550 | 0.00000  | 0.03945  | 0.00000  | 0.00000  |
| 182 | C10 | DZZ | -0.02961 | 0.00000  | 0.04984  | 0.00000  | 0.00000  |
| 183 | C10 | DXY | -0.01385 | 0.00000  | -0.03195 | 0.00000  | 0.00000  |
| 184 | C10 | DXZ | 0.00000  | 0.19505  | 0.00000  | 0.31519  | -0.14786 |
| 185 | C10 | DYZ | 0.00000  | -0.14189 | 0.00000  | 0.17395  | -0.13298 |
| 186 | H16 | S   | 0.15817  | 0.00000  | 0.01187  | 0.00000  | 0.00000  |
| 187 | H16 | S   | 0.14199  | 0.00000  | 0.05032  | 0.00000  | 0.00000  |
| 188 | H16 | PX  | -0.00757 | 0.00000  | 0.00892  | 0.00000  | 0.00000  |
| 189 | H16 | PY  | -0.00474 | 0.00000  | -0.01647 | 0.00000  | 0.00000  |
| 190 | H16 | PZ  | 0.00000  | 0.11275  | 0.00000  | 0.13259  | -0.05821 |
| 191 | H18 | S   | -0.07303 | 0.00000  | -0.04594 | 0.00000  | 0.00000  |
| 192 | H18 | S   | -0.20072 | 0.00000  | -0.03155 | 0.00000  | 0.00000  |
| 193 | H18 | PX  | 0.00233  | 0.00000  | -0.00457 | 0.00000  | 0.00000  |
| 194 | H18 | PY  | 0.01726  | 0.00000  | -0.00798 | 0.00000  | 0.00000  |
| 195 | H18 | PZ  | 0.00000  | -0.02897 | 0.00000  | -0.18301 | 0.10433  |
| 196 | C9  | S   | 0.00735  | 0.00000  | 0.01506  | 0.00000  | 0.00000  |
| 197 | C9  | S   | 0.11357  | 0.00000  | 0.17776  | 0.00000  | 0.00000  |
| 198 | C9  | PX  | -0.10007 | 0.00000  | 0.07919  | 0.00000  | 0.00000  |
| 199 | C9  | PY  | -0.07254 | 0.00000  | -0.03207 | 0.00000  | 0.00000  |
| 200 | C9  | PZ  | 0.00000  | -0.00636 | 0.00000  | 0.01313  | 0.07119  |
| 201 | C9  | S   | 0.37220  | 0.00000  | -0.86014 | 0.00000  | 0.00000  |
| 202 | C9  | PX  | -0.28168 | 0.00000  | 0.15951  | 0.00000  | 0.00000  |
| 203 | C9  | PY  | 0.00325  | 0.00000  | 0.34255  | 0.00000  | 0.00000  |
| 204 | C9  | PZ  | 0.00000  | 0.14747  | 0.00000  | -0.16843 | -0.44117 |
| 205 | C9  | DXX | -0.05233 | 0.00000  | 0.02921  | 0.00000  | 0.00000  |
| 206 | C9  | DYY | 0.07704  | 0.00000  | -0.03604 | 0.00000  | 0.00000  |
| 207 | C9  | DZZ | 0.03090  | 0.00000  | -0.00101 | 0.00000  | 0.00000  |
| 208 | C9  | DXY | 0.18389  | 0.00000  | -0.13171 | 0.00000  | 0.00000  |
| 209 | C9  | DXZ | 0.00000  | -0.01084 | 0.00000  | 0.03581  | 0.13988  |
| 210 | C9  | DYZ | 0.00000  | -0.08795 | 0.00000  | 0.11053  | 0.30611  |
| 211 | H3  | S   | -0.05175 | 0.00000  | 0.03998  | 0.00000  | 0.00000  |
| 212 | H3  | S   | -0.08665 | 0.00000  | -0.03495 | 0.00000  | 0.00000  |
| 213 | H3  | PX  | 0.06707  | 0.00000  | -0.06990 | 0.00000  | 0.00000  |
| 214 | H3  | PY  | 0.00859  | 0.00000  | -0.00491 | 0.00000  | 0.00000  |
| 215 | H3  | PZ  | 0.00000  | -0.01504 | 0.00000  | 0.02107  | 0.07685  |
| 216 | H5  | S   | 0.01148  | 0.03908  | 0.08372  | -0.04149 | -0.05000 |
| 217 | H5  | S   | 0.03361  | 0.05694  | 0.07838  | -0.06063 | -0.19823 |
| 218 | H5  | PX  | -0.02342 | 0.01977  | 0.01623  | -0.02939 | -0.07776 |
| 219 | H5  | PY  | 0.03149  | 0.01998  | -0.00234 | -0.03413 | -0.10237 |
| 220 | H5  | PZ  | -0.03630 | 0.00513  | 0.01969  | -0.00845 | -0.02332 |
| 221 | H7  | S   | 0.01148  | -0.03908 | 0.08372  | 0.04149  | 0.05000  |
| 222 | H7  | S   | 0.03361  | -0.05694 | 0.07838  | 0.06063  | 0.19823  |
| 223 | H7  | PX  | -0.02342 | -0.01977 | 0.01623  | 0.02939  | 0.07776  |

|     |    |    |         |          |          |          |          |
|-----|----|----|---------|----------|----------|----------|----------|
| 224 | H7 | PY | 0.03149 | -0.01998 | -0.00234 | 0.03413  | 0.10237  |
| 225 | H7 | PZ | 0.03630 | 0.00513  | -0.01969 | -0.00845 | -0.02332 |

|              |  |          |          |          |          |          |
|--------------|--|----------|----------|----------|----------|----------|
| MO:          |  | 131      | 132      | 133      | 134      | 135      |
| Eigenvalues: |  | 1.76128  | 1.77360  | 1.88956  | 1.93003  | 1.98351  |
| (ev):        |  | 47.92702 | 48.26220 | 51.41768 | 52.51890 | 53.97413 |

|    |    | A   | A        | A        | A        | A        |          |
|----|----|-----|----------|----------|----------|----------|----------|
| 1  | H1 | S   | 0.00000  | -0.22188 | -0.05629 | 0.13897  | -0.18629 |
| 2  | H1 | S   | 0.00000  | -0.04031 | -0.00271 | 0.35563  | -0.13177 |
| 3  | H1 | PX  | 0.00000  | -0.02408 | -0.00126 | 0.02052  | -0.02359 |
| 4  | H1 | PY  | 0.00000  | 0.05217  | -0.02240 | -0.07853 | -0.04362 |
| 5  | H1 | PZ  | -0.05805 | 0.00000  | 0.00000  | 0.00000  | 0.00000  |
| 6  | C1 | S   | 0.00000  | 0.03289  | -0.02192 | 0.01814  | 0.00359  |
| 7  | C1 | S   | 0.00000  | 0.53373  | -0.09084 | 0.17671  | 0.14808  |
| 8  | C1 | PX  | 0.00000  | -0.15607 | -0.02254 | 0.09716  | -0.00597 |
| 9  | C1 | PY  | 0.00000  | -0.01057 | -0.00245 | -0.13244 | -0.10437 |
| 10 | C1 | PZ  | -0.04569 | 0.00000  | 0.00000  | 0.00000  | 0.00000  |
| 11 | C1 | S   | 0.00000  | -3.64290 | 1.49353  | -2.64644 | -0.09275 |
| 12 | C1 | PX  | 0.00000  | 0.81929  | -0.64320 | 0.20772  | 0.36247  |
| 13 | C1 | PY  | 0.00000  | 2.76291  | 0.69742  | -0.94982 | 0.32023  |
| 14 | C1 | PZ  | 0.08445  | 0.00000  | 0.00000  | 0.00000  | 0.00000  |
| 15 | C1 | DXX | 0.00000  | 0.03574  | 0.04454  | 0.09123  | 0.07717  |
| 16 | C1 | DYY | 0.00000  | -0.00472 | -0.16847 | -0.08849 | -0.07915 |
| 17 | C1 | DZZ | 0.00000  | -0.03859 | 0.17266  | -0.02208 | 0.01672  |
| 18 | C1 | DXY | 0.00000  | -0.01500 | -0.06618 | -0.09555 | 0.01344  |
| 19 | C1 | DXZ | -0.08250 | 0.00000  | 0.00000  | 0.00000  | 0.00000  |
| 20 | C1 | DYZ | -0.08329 | 0.00000  | 0.00000  | 0.00000  | 0.00000  |
| 21 | C2 | S   | 0.00000  | 0.03044  | -0.00171 | 0.00368  | -0.00445 |
| 22 | C2 | S   | 0.00000  | 0.59337  | 0.22177  | 0.25140  | 0.00531  |
| 23 | C2 | PX  | 0.00000  | 0.18706  | 0.15622  | 0.12660  | 0.02977  |
| 24 | C2 | PY  | 0.00000  | -0.02230 | -0.11123 | -0.19916 | -0.01323 |
| 25 | C2 | PZ  | -0.00571 | 0.00000  | 0.00000  | 0.00000  | 0.00000  |
| 26 | C2 | S   | 0.00000  | -3.69143 | 0.43162  | -1.07691 | -0.01978 |
| 27 | C2 | PX  | 0.00000  | -2.45783 | -0.03245 | -0.65366 | -0.69030 |
| 28 | C2 | PY  | 0.00000  | -0.16981 | -0.04949 | -0.07354 | -1.32415 |
| 29 | C2 | PZ  | -0.05238 | 0.00000  | 0.00000  | 0.00000  | 0.00000  |
| 30 | C2 | DXX | 0.00000  | 0.00718  | -0.06570 | -0.01459 | -0.10720 |
| 31 | C2 | DYY | 0.00000  | 0.02409  | -0.02097 | -0.04606 | 0.00422  |
| 32 | C2 | DZZ | 0.00000  | -0.01996 | 0.11811  | 0.07602  | 0.13308  |
| 33 | C2 | DXY | 0.00000  | -0.03249 | 0.09497  | 0.11436  | 0.12304  |
| 34 | C2 | DXZ | -0.02798 | 0.00000  | 0.00000  | 0.00000  | 0.00000  |
| 35 | C2 | DYZ | 0.02779  | 0.00000  | 0.00000  | 0.00000  | 0.00000  |
| 36 | C3 | S   | 0.00000  | -0.01418 | 0.02639  | -0.00216 | 0.01425  |
| 37 | C3 | S   | 0.00000  | -0.50427 | 0.49625  | -0.22690 | 0.27599  |
| 38 | C3 | PX  | 0.00000  | 0.02003  | 0.06645  | 0.14335  | -0.08072 |
| 39 | C3 | PY  | 0.00000  | -0.58057 | 0.10281  | -0.13267 | 0.08518  |
| 40 | C3 | PZ  | 0.02715  | 0.00000  | 0.00000  | 0.00000  | 0.00000  |
| 41 | C3 | S   | 0.00000  | 2.28403  | -1.62373 | 0.40692  | -3.04955 |
| 42 | C3 | PX  | 0.00000  | -0.72130 | 1.02791  | -1.23867 | 0.81201  |
| 43 | C3 | PY  | 0.00000  | 6.02401  | 0.41785  | 1.33322  | 0.46253  |
| 44 | C3 | PZ  | -0.15073 | 0.00000  | 0.00000  | 0.00000  | 0.00000  |
| 45 | C3 | DXX | 0.00000  | 0.00365  | 0.17751  | 0.14714  | -0.04868 |
| 46 | C3 | DYY | 0.00000  | -0.01494 | -0.19919 | -0.16832 | -0.04062 |

|     |    |     |          |          |          |          |          |
|-----|----|-----|----------|----------|----------|----------|----------|
| 47  | C3 | DZZ | 0.00000  | -0.03529 | 0.04374  | 0.02464  | 0.15126  |
| 48  | C3 | DXY | 0.00000  | -0.00401 | -0.12725 | -0.07468 | -0.08073 |
| 49  | C3 | DXZ | 0.19684  | 0.00000  | 0.00000  | 0.00000  | 0.00000  |
| 50  | C3 | DYZ | 0.08427  | 0.00000  | 0.00000  | 0.00000  | 0.00000  |
| 51  | C4 | S   | 0.00000  | 0.03347  | 0.00786  | -0.00321 | -0.00817 |
| 52  | C4 | S   | 0.00000  | 0.38116  | 0.28106  | -0.02786 | -0.02676 |
| 53  | C4 | PX  | 0.00000  | -0.02269 | 0.04175  | -0.20224 | -0.00371 |
| 54  | C4 | PY  | 0.00000  | -0.22077 | 0.19773  | -0.19734 | 0.05890  |
| 55  | C4 | PZ  | 0.00126  | 0.00000  | 0.00000  | 0.00000  | 0.00000  |
| 56  | C4 | S   | 0.00000  | -1.49259 | -0.96965 | 0.17156  | 1.06810  |
| 57  | C4 | PX  | 0.00000  | 0.18445  | -1.56105 | 3.11144  | -0.54722 |
| 58  | C4 | PY  | 0.00000  | 2.79761  | -0.03889 | 1.16493  | -0.28304 |
| 59  | C4 | PZ  | -0.02215 | 0.00000  | 0.00000  | 0.00000  | 0.00000  |
| 60  | C4 | DXX | 0.00000  | -0.02634 | -0.15691 | -0.01752 | -0.09637 |
| 61  | C4 | DYY | 0.00000  | 0.16439  | 0.03293  | -0.01933 | 0.08496  |
| 62  | C4 | DZZ | 0.00000  | -0.09312 | 0.15904  | 0.00397  | 0.04270  |
| 63  | C4 | DXY | 0.00000  | 0.04163  | -0.05707 | -0.18388 | -0.04817 |
| 64  | C4 | DXZ | 0.03880  | 0.00000  | 0.00000  | 0.00000  | 0.00000  |
| 65  | C4 | DYZ | -0.02599 | 0.00000  | 0.00000  | 0.00000  | 0.00000  |
| 66  | C5 | S   | 0.00000  | -0.03049 | 0.00090  | -0.02631 | 0.01226  |
| 67  | C5 | S   | 0.00000  | -0.69620 | 0.05520  | -0.19228 | 0.27626  |
| 68  | C5 | PX  | 0.00000  | -0.17775 | 0.02268  | 0.13806  | 0.03579  |
| 69  | C5 | PY  | 0.00000  | -0.00499 | 0.00569  | 0.20490  | -0.08760 |
| 70  | C5 | PZ  | 0.00422  | 0.00000  | 0.00000  | 0.00000  | 0.00000  |
| 71  | C5 | S   | 0.00000  | 3.41289  | -0.81334 | 2.84668  | -0.05980 |
| 72  | C5 | PX  | 0.00000  | 2.19485  | -0.22353 | 1.40949  | -0.86003 |
| 73  | C5 | PY  | 0.00000  | -1.91610 | -0.34170 | -1.07785 | -0.03422 |
| 74  | C5 | PZ  | 0.00788  | 0.00000  | 0.00000  | 0.00000  | 0.00000  |
| 75  | C5 | DXX | 0.00000  | 0.01065  | -0.16352 | -0.10235 | -0.09808 |
| 76  | C5 | DYY | 0.00000  | -0.02365 | 0.02719  | 0.07880  | 0.07639  |
| 77  | C5 | DZZ | 0.00000  | -0.01875 | 0.15166  | 0.05899  | 0.02344  |
| 78  | C5 | DXY | 0.00000  | -0.04392 | -0.03626 | -0.03640 | -0.04442 |
| 79  | C5 | DXZ | -0.04947 | 0.00000  | 0.00000  | 0.00000  | 0.00000  |
| 80  | C5 | DYZ | -0.03016 | 0.00000  | 0.00000  | 0.00000  | 0.00000  |
| 81  | C6 | S   | 0.00000  | 0.00889  | -0.00637 | 0.01703  | -0.01113 |
| 82  | C6 | S   | 0.00000  | 0.13133  | -0.08129 | 0.37500  | 0.07503  |
| 83  | C6 | PX  | 0.00000  | 0.10668  | -0.13019 | -0.11564 | -0.15407 |
| 84  | C6 | PY  | 0.00000  | -0.13964 | 0.01416  | 0.06943  | -0.06381 |
| 85  | C6 | PZ  | -0.01395 | 0.00000  | 0.00000  | 0.00000  | 0.00000  |
| 86  | C6 | S   | 0.00000  | 2.55040  | 3.06611  | 0.06141  | -2.32265 |
| 87  | C6 | PX  | 0.00000  | -1.41900 | 1.59398  | -0.40578 | 1.87942  |
| 88  | C6 | PY  | 0.00000  | -0.43439 | -1.64632 | -1.48185 | 3.44351  |
| 89  | C6 | PZ  | 0.19711  | 0.00000  | 0.00000  | 0.00000  | 0.00000  |
| 90  | C6 | DXX | 0.00000  | 0.01789  | -0.08010 | -0.03907 | -0.11486 |
| 91  | C6 | DYY | 0.00000  | 0.07395  | 0.05107  | 0.06958  | -0.15587 |
| 92  | C6 | DZZ | 0.00000  | -0.05527 | 0.03367  | -0.01169 | 0.36897  |
| 93  | C6 | DXY | 0.00000  | 0.00543  | 0.21519  | 0.21334  | 0.03021  |
| 94  | C6 | DXZ | -0.02585 | 0.00000  | 0.00000  | 0.00000  | 0.00000  |
| 95  | C6 | DYZ | -0.12630 | 0.00000  | 0.00000  | 0.00000  | 0.00000  |
| 96  | C7 | S   | 0.00000  | -0.00183 | 0.00516  | 0.00753  | -0.01957 |
| 97  | C7 | S   | 0.00000  | -0.03278 | -0.00418 | -0.02518 | -0.42367 |
| 98  | C7 | PX  | 0.00000  | -0.02545 | -0.06062 | 0.00617  | 0.02888  |
| 99  | C7 | PY  | 0.00000  | 0.20734  | 0.00397  | 0.12948  | -0.13085 |
| 100 | C7 | PZ  | 0.06320  | 0.00000  | 0.00000  | 0.00000  | 0.00000  |

|     |    |     |          |          |          |          |          |
|-----|----|-----|----------|----------|----------|----------|----------|
| 101 | C7 | S   | 0.00000  | 1.84004  | 0.12453  | 0.12734  | 2.29331  |
| 102 | C7 | PX  | 0.00000  | -1.00912 | 0.61204  | 0.20288  | -2.37140 |
| 103 | C7 | PY  | 0.00000  | 0.83387  | -0.57614 | 0.52383  | 0.47385  |
| 104 | C7 | PZ  | -0.09727 | 0.00000  | 0.00000  | 0.00000  | 0.00000  |
| 105 | C7 | DXX | 0.00000  | 0.00153  | -0.19977 | -0.12991 | -0.01452 |
| 106 | C7 | DYY | 0.00000  | 0.01722  | 0.12954  | 0.10064  | -0.07995 |
| 107 | C7 | DZZ | 0.00000  | -0.00930 | 0.04890  | 0.02801  | 0.17577  |
| 108 | C7 | DXY | 0.00000  | -0.08174 | 0.04831  | 0.01508  | -0.08384 |
| 109 | C7 | DXZ | 0.21815  | 0.00000  | 0.00000  | 0.00000  | 0.00000  |
| 110 | C7 | DYZ | 0.23940  | 0.00000  | 0.00000  | 0.00000  | 0.00000  |
| 111 | O1 | S   | 0.00000  | -0.00643 | -0.01387 | 0.05872  | 0.00388  |
| 112 | O1 | S   | 0.00000  | -0.07366 | -0.19921 | 0.63385  | 0.06668  |
| 113 | O1 | PX  | 0.00000  | -0.18809 | -0.05709 | 0.28583  | -0.00811 |
| 114 | O1 | PY  | 0.00000  | -0.19489 | -0.10585 | 0.12861  | -0.06196 |
| 115 | O1 | PZ  | -0.01401 | 0.00000  | 0.00000  | 0.00000  | 0.00000  |
| 116 | O1 | S   | 0.00000  | 0.01197  | 0.73270  | -2.50599 | -0.13326 |
| 117 | O1 | PX  | 0.00000  | 1.07112  | 0.46518  | -1.42096 | 0.14093  |
| 118 | O1 | PY  | 0.00000  | 1.29298  | 0.41311  | -0.39967 | 0.34937  |
| 119 | O1 | PZ  | 0.04381  | 0.00000  | 0.00000  | 0.00000  | 0.00000  |
| 120 | O1 | DXX | 0.00000  | -0.05212 | -0.11032 | 0.30815  | -0.00230 |
| 121 | O1 | DYY | 0.00000  | -0.01601 | -0.05131 | 0.19746  | 0.04480  |
| 122 | O1 | DZZ | 0.00000  | -0.03125 | 0.01898  | -0.00357 | -0.01032 |
| 123 | O1 | DXY | 0.00000  | -0.05866 | -0.12233 | 0.21600  | -0.03159 |
| 124 | O1 | DXZ | -0.01948 | 0.00000  | 0.00000  | 0.00000  | 0.00000  |
| 125 | O1 | DYZ | 0.01043  | 0.00000  | 0.00000  | 0.00000  | 0.00000  |
| 126 | H4 | S   | 0.00000  | 0.31521  | 0.08919  | 0.17391  | -0.14830 |
| 127 | H4 | S   | 0.00000  | 0.67989  | 0.09722  | 0.44026  | -0.18647 |
| 128 | H4 | PX  | 0.00000  | -0.01491 | 0.02615  | -0.01315 | 0.02725  |
| 129 | H4 | PY  | 0.00000  | 0.03838  | 0.02626  | -0.00318 | -0.00783 |
| 130 | H4 | PZ  | 0.00790  | 0.00000  | 0.00000  | 0.00000  | 0.00000  |
| 131 | N1 | S   | 0.00000  | 0.00334  | 0.08153  | 0.01435  | -0.08700 |
| 132 | N1 | S   | 0.00000  | -0.05745 | 1.01957  | 0.02745  | -1.29721 |
| 133 | N1 | PX  | 0.00000  | -0.14029 | 0.08259  | -0.01491 | 0.09267  |
| 134 | N1 | PY  | 0.00000  | 0.00435  | -0.01891 | -0.04172 | -0.06824 |
| 135 | N1 | PZ  | -0.09482 | 0.00000  | 0.00000  | 0.00000  | 0.00000  |
| 136 | N1 | S   | 0.00000  | -0.62349 | -5.42373 | -1.06153 | 7.19966  |
| 137 | N1 | PX  | 0.00000  | 0.74918  | -1.67930 | 0.10905  | 0.85801  |
| 138 | N1 | PY  | 0.00000  | -1.30852 | -0.78215 | -0.91176 | 1.81129  |
| 139 | N1 | PZ  | -0.13483 | 0.00000  | 0.00000  | 0.00000  | 0.00000  |
| 140 | N1 | DXX | 0.00000  | -0.07873 | 0.11246  | -0.12805 | -0.28168 |
| 141 | N1 | DYY | 0.00000  | 0.00570  | 0.19158  | 0.04244  | -0.28698 |
| 142 | N1 | DZZ | 0.00000  | 0.03865  | 0.04713  | 0.07627  | 0.22550  |
| 143 | N1 | DXY | 0.00000  | -0.00808 | -0.15139 | -0.18723 | 0.05185  |
| 144 | N1 | DXZ | 0.34769  | 0.00000  | 0.00000  | 0.00000  | 0.00000  |
| 145 | N1 | DYZ | 0.03428  | 0.00000  | 0.00000  | 0.00000  | 0.00000  |
| 146 | H6 | S   | 0.00000  | -0.21413 | -0.01203 | -0.09914 | -0.24106 |
| 147 | H6 | S   | 0.00000  | -0.57029 | -0.05666 | -0.10741 | -0.33979 |
| 148 | H6 | PX  | 0.00000  | 0.01490  | 0.01372  | 0.04012  | 0.04903  |
| 149 | H6 | PY  | 0.00000  | 0.01168  | -0.01983 | -0.05398 | -0.07644 |
| 150 | H6 | PZ  | -0.00256 | 0.00000  | 0.00000  | 0.00000  | 0.00000  |
| 151 | C8 | S   | 0.00000  | -0.00923 | 0.01302  | 0.00995  | 0.01921  |
| 152 | C8 | S   | 0.00000  | -0.04892 | 0.08659  | 0.07350  | 0.43761  |
| 153 | C8 | PX  | 0.00000  | -0.12627 | 0.01219  | -0.07883 | -0.10871 |
| 154 | C8 | PY  | 0.00000  | -0.20279 | -0.05250 | -0.14021 | 0.08020  |

|     |     |     |          |          |          |          |          |
|-----|-----|-----|----------|----------|----------|----------|----------|
| 155 | C8  | PZ  | -0.02715 | 0.00000  | 0.00000  | 0.00000  | 0.00000  |
| 156 | C8  | S   | 0.00000  | -1.86436 | 0.61847  | -0.98674 | -2.57796 |
| 157 | C8  | PX  | 0.00000  | 0.78446  | -2.30724 | 0.55344  | 1.62453  |
| 158 | C8  | PY  | 0.00000  | 3.13767  | 1.68899  | 2.09835  | -2.50495 |
| 159 | C8  | PZ  | 0.17372  | 0.00000  | 0.00000  | 0.00000  | 0.00000  |
| 160 | C8  | DXX | 0.00000  | -0.07652 | 0.13469  | 0.07620  | -0.10235 |
| 161 | C8  | DYY | 0.00000  | -0.04528 | -0.13814 | -0.12413 | -0.06844 |
| 162 | C8  | DZZ | 0.00000  | 0.07355  | 0.00035  | 0.01714  | 0.21241  |
| 163 | C8  | DXY | 0.00000  | 0.01891  | 0.03006  | 0.09160  | -0.02451 |
| 164 | C8  | DXZ | -0.30860 | 0.00000  | 0.00000  | 0.00000  | 0.00000  |
| 165 | C8  | DYZ | 0.03477  | 0.00000  | 0.00000  | 0.00000  | 0.00000  |
| 166 | H8  | S   | 0.00000  | 0.11888  | 0.04624  | 0.11878  | 0.31817  |
| 167 | H8  | S   | 0.00000  | 0.24079  | -0.33573 | -0.12629 | 0.67148  |
| 168 | H8  | PX  | 0.00000  | 0.01919  | 0.03037  | 0.03051  | 0.04189  |
| 169 | H8  | PY  | 0.00000  | -0.01629 | -0.00591 | 0.01143  | -0.05524 |
| 170 | H8  | PZ  | 0.09793  | 0.00000  | 0.00000  | 0.00000  | 0.00000  |
| 171 | C10 | S   | 0.00000  | -0.01546 | -0.00620 | -0.01234 | 0.00275  |
| 172 | C10 | S   | 0.00000  | 0.01979  | 0.05492  | 0.01938  | -0.10203 |
| 173 | C10 | PX  | 0.00000  | -0.05213 | -0.03393 | -0.03790 | 0.01581  |
| 174 | C10 | PY  | 0.00000  | 0.22061  | 0.14619  | 0.18794  | -0.06390 |
| 175 | C10 | PZ  | 0.02564  | 0.00000  | 0.00000  | 0.00000  | 0.00000  |
| 176 | C10 | S   | 0.00000  | 2.70893  | 1.36583  | 1.80492  | -1.17880 |
| 177 | C10 | PX  | 0.00000  | -0.77495 | 0.79893  | -0.53947 | -0.59157 |
| 178 | C10 | PY  | 0.00000  | 0.90481  | 0.67882  | 0.55267  | -0.42071 |
| 179 | C10 | PZ  | -0.06982 | 0.00000  | 0.00000  | 0.00000  | 0.00000  |
| 180 | C10 | DXX | 0.00000  | -0.03425 | -0.04796 | 0.00627  | -0.00411 |
| 181 | C10 | DYY | 0.00000  | 0.03119  | 0.00008  | -0.00618 | -0.03633 |
| 182 | C10 | DZZ | 0.00000  | 0.03742  | 0.08358  | 0.04972  | 0.09115  |
| 183 | C10 | DXY | 0.00000  | -0.05058 | 0.03391  | -0.01601 | -0.00587 |
| 184 | C10 | DXZ | 0.47851  | 0.00000  | 0.00000  | 0.00000  | 0.00000  |
| 185 | C10 | DYZ | 0.00589  | 0.00000  | 0.00000  | 0.00000  | 0.00000  |
| 186 | H16 | S   | 0.00000  | 0.01316  | -0.15200 | -0.00830 | 0.13135  |
| 187 | H16 | S   | 0.00000  | 0.19742  | -0.26120 | 0.14066  | 0.25365  |
| 188 | H16 | PX  | 0.00000  | 0.01569  | 0.00439  | 0.01889  | 0.02447  |
| 189 | H16 | PY  | 0.00000  | -0.01086 | 0.00431  | 0.01824  | 0.01577  |
| 190 | H16 | PZ  | 0.27469  | 0.00000  | 0.00000  | 0.00000  | 0.00000  |
| 191 | H18 | S   | 0.00000  | -0.12383 | 0.14620  | -0.10019 | -0.10901 |
| 192 | H18 | S   | 0.00000  | -0.17685 | 0.25908  | -0.14385 | -0.14189 |
| 193 | H18 | PX  | 0.00000  | -0.00230 | -0.02470 | -0.01459 | -0.00597 |
| 194 | H18 | PY  | 0.00000  | -0.00518 | 0.00065  | 0.00984  | 0.01488  |
| 195 | H18 | PZ  | -0.23021 | 0.00000  | 0.00000  | 0.00000  | 0.00000  |
| 196 | C9  | S   | 0.00000  | 0.07625  | -0.00830 | 0.00494  | -0.00081 |
| 197 | C9  | S   | 0.00000  | 0.87661  | -0.11980 | -0.04626 | -0.02934 |
| 198 | C9  | PX  | 0.00000  | 0.12214  | 0.04698  | -0.17689 | 0.01374  |
| 199 | C9  | PY  | 0.00000  | -0.15464 | 0.10156  | -0.10865 | 0.00838  |
| 200 | C9  | PZ  | 0.00890  | 0.00000  | 0.00000  | 0.00000  | 0.00000  |
| 201 | C9  | S   | 0.00000  | -3.17215 | -0.20040 | 1.34302  | -0.05517 |
| 202 | C9  | PX  | 0.00000  | 0.56601  | 0.36763  | -0.63082 | 0.13601  |
| 203 | C9  | PY  | 0.00000  | 1.10981  | -0.39377 | 0.27851  | -0.09599 |
| 204 | C9  | PZ  | -0.04374 | 0.00000  | 0.00000  | 0.00000  | 0.00000  |
| 205 | C9  | DXX | 0.00000  | -0.10657 | -0.30974 | 0.35305  | -0.12446 |
| 206 | C9  | DYY | 0.00000  | 0.03237  | 0.12065  | -0.05743 | 0.06220  |
| 207 | C9  | DZZ | 0.00000  | 0.13439  | 0.18067  | -0.24220 | 0.06449  |
| 208 | C9  | DXY | 0.00000  | -0.06075 | 0.15690  | -0.00508 | 0.07596  |



|     |    |     |          |          |          |          |          |
|-----|----|-----|----------|----------|----------|----------|----------|
| 209 | C9 | DXZ | 0.01711  | 0.00000  | 0.00000  | 0.00000  | 0.00000  |
| 210 | C9 | DYZ | 0.03353  | 0.00000  | 0.00000  | 0.00000  | 0.00000  |
| 211 | H3 | S   | 0.00000  | 0.18945  | 0.05406  | -0.18872 | 0.01158  |
| 212 | H3 | S   | 0.00000  | -0.08306 | 0.24360  | -0.34527 | 0.05169  |
| 213 | H3 | PX  | 0.00000  | -0.01489 | 0.16396  | -0.07963 | 0.08242  |
| 214 | H3 | PY  | 0.00000  | 0.01917  | 0.00987  | -0.00484 | 0.00799  |
| 215 | H3 | PZ  | 0.01026  | 0.00000  | 0.00000  | 0.00000  | 0.00000  |
| 216 | H5 | S   | -0.00206 | 0.35679  | -0.04896 | 0.01931  | -0.00624 |
| 217 | H5 | S   | -0.02007 | 0.30600  | -0.08960 | -0.10861 | -0.04371 |
| 218 | H5 | PX  | -0.00839 | -0.03465 | -0.10387 | 0.08944  | -0.04895 |
| 219 | H5 | PY  | -0.01047 | 0.02545  | -0.03075 | 0.00183  | -0.01598 |
| 220 | H5 | PZ  | -0.00272 | -0.02144 | -0.05465 | 0.03906  | -0.02522 |
| 221 | H7 | S   | 0.00206  | 0.35679  | -0.04896 | 0.01931  | -0.00624 |
| 222 | H7 | S   | 0.02007  | 0.30600  | -0.08960 | -0.10861 | -0.04371 |
| 223 | H7 | PX  | 0.00839  | -0.03465 | -0.10387 | 0.08944  | -0.04895 |
| 224 | H7 | PY  | 0.01047  | 0.02545  | -0.03075 | 0.00183  | -0.01598 |
| 225 | H7 | PZ  | -0.00272 | 0.02144  | 0.05465  | -0.03906 | 0.02522  |

|              |          |          |          |          |          |
|--------------|----------|----------|----------|----------|----------|
| MO:          | 136      | 137      | 138      | 139      | 140      |
| Eigenvalues: | 2.03285  | 2.07072  | 2.10565  | 2.10726  | 2.12833  |
| (ev):        | 55.31678 | 56.34722 | 57.29768 | 57.34162 | 57.91471 |

|    |    |     |          |          |          |          |          |
|----|----|-----|----------|----------|----------|----------|----------|
|    |    | A   | A        | A        | A        | A        |          |
| 1  | H1 | S   | -0.03448 | -0.00721 | 0.17825  | 0.00000  | 0.23073  |
| 2  | H1 | S   | 0.08424  | 0.38995  | 0.13455  | 0.00000  | 0.47675  |
| 3  | H1 | PX  | 0.02129  | -0.01379 | 0.09304  | 0.00000  | 0.02346  |
| 4  | H1 | PY  | 0.01617  | 0.01124  | -0.07421 | 0.00000  | 0.03635  |
| 5  | H1 | PZ  | 0.00000  | 0.00000  | 0.00000  | -0.24925 | 0.00000  |
| 6  | C1 | S   | -0.01942 | -0.01913 | -0.01747 | 0.00000  | -0.01097 |
| 7  | C1 | S   | -0.24978 | -0.23415 | -0.04903 | 0.00000  | -0.51555 |
| 8  | C1 | PX  | -0.01437 | -0.02442 | -0.07614 | 0.00000  | 0.18270  |
| 9  | C1 | PY  | -0.04443 | 0.11912  | 0.08463  | 0.00000  | 0.13625  |
| 10 | C1 | PZ  | 0.00000  | 0.00000  | 0.00000  | 0.00206  | 0.00000  |
| 11 | C1 | S   | 0.56215  | 0.63208  | 2.12566  | 0.00000  | 0.89898  |
| 12 | C1 | PX  | -0.53362 | -1.32361 | -1.03065 | 0.00000  | -1.73184 |
| 13 | C1 | PY  | 0.55078  | 0.59393  | 0.10710  | 0.00000  | 0.15503  |
| 14 | C1 | PZ  | 0.00000  | 0.00000  | 0.00000  | 0.54326  | 0.00000  |
| 15 | C1 | DXX | 0.03150  | 0.05553  | -0.05695 | 0.00000  | 0.02851  |
| 16 | C1 | DYY | 0.09710  | 0.06638  | 0.00226  | 0.00000  | 0.09033  |
| 17 | C1 | DZZ | -0.09148 | -0.02696 | 0.05990  | 0.00000  | -0.18561 |
| 18 | C1 | DXY | -0.00610 | 0.17987  | -0.15152 | 0.00000  | -0.15165 |
| 19 | C1 | DXZ | 0.00000  | 0.00000  | 0.00000  | -0.31069 | 0.00000  |
| 20 | C1 | DYZ | 0.00000  | 0.00000  | 0.00000  | -0.42950 | 0.00000  |
| 21 | C2 | S   | -0.01365 | 0.01165  | -0.01535 | 0.00000  | 0.00634  |
| 22 | C2 | S   | 0.04959  | 0.50570  | -0.23220 | 0.00000  | 0.12467  |
| 23 | C2 | PX  | 0.07250  | 0.22370  | 0.02937  | 0.00000  | 0.06567  |
| 24 | C2 | PY  | -0.02608 | -0.00310 | -0.04059 | 0.00000  | -0.14202 |
| 25 | C2 | PZ  | 0.00000  | 0.00000  | 0.00000  | 0.01620  | 0.00000  |
| 26 | C2 | S   | 0.83916  | -0.77106 | 1.09378  | 0.00000  | -0.55301 |
| 27 | C2 | PX  | -0.55355 | -1.17286 | 0.75032  | 0.00000  | -0.49157 |
| 28 | C2 | PY  | -1.35388 | -1.69391 | -0.52256 | 0.00000  | -1.05235 |
| 29 | C2 | PZ  | 0.00000  | 0.00000  | 0.00000  | -0.13725 | 0.00000  |
| 30 | C2 | DXX | -0.06816 | 0.00318  | -0.07924 | 0.00000  | -0.21487 |
| 31 | C2 | DYY | 0.08812  | -0.08685 | 0.05457  | 0.00000  | 0.13514  |

|    |    |     |          |          |          |          |          |
|----|----|-----|----------|----------|----------|----------|----------|
| 32 | C2 | DZZ | -0.05563 | 0.10579  | 0.09327  | 0.00000  | 0.03228  |
| 33 | C2 | DXY | 0.06123  | -0.12544 | -0.16307 | 0.00000  | 0.00472  |
| 34 | C2 | DXZ | 0.00000  | 0.00000  | 0.00000  | -0.08891 | 0.00000  |
| 35 | C2 | DYZ | 0.00000  | 0.00000  | 0.00000  | 0.14446  | 0.00000  |
| 36 | C3 | S   | 0.03410  | 0.05226  | 0.01674  | 0.00000  | 0.03701  |
| 37 | C3 | S   | 0.20335  | 0.70247  | 0.24908  | 0.00000  | 0.23368  |
| 38 | C3 | PX  | 0.04510  | -0.23067 | 0.02949  | 0.00000  | 0.08096  |
| 39 | C3 | PY  | 0.09415  | -0.13942 | -0.09311 | 0.00000  | -0.14688 |
| 40 | C3 | PZ  | 0.00000  | 0.00000  | 0.00000  | -0.04023 | 0.00000  |
| 41 | C3 | S   | -4.34098 | -6.41876 | -1.98770 | 0.00000  | -5.23912 |
| 42 | C3 | PX  | 2.04117  | 2.62263  | 0.23932  | 0.00000  | 1.02869  |
| 43 | C3 | PY  | 0.95943  | 3.30769  | 0.52916  | 0.00000  | 3.33352  |
| 44 | C3 | PZ  | 0.00000  | 0.00000  | 0.00000  | -0.85225 | 0.00000  |
| 45 | C3 | DXX | 0.23600  | -0.06188 | 0.08297  | 0.00000  | 0.03713  |
| 46 | C3 | DYY | -0.03397 | -0.02975 | -0.09744 | 0.00000  | 0.05690  |
| 47 | C3 | DZZ | -0.26662 | -0.00725 | 0.04716  | 0.00000  | -0.18925 |
| 48 | C3 | DXY | 0.07952  | -0.18937 | 0.08991  | 0.00000  | 0.19302  |
| 49 | C3 | DXZ | 0.00000  | 0.00000  | 0.00000  | -0.01238 | 0.00000  |
| 50 | C3 | DYZ | 0.00000  | 0.00000  | 0.00000  | -0.04772 | 0.00000  |
| 51 | C4 | S   | 0.00392  | 0.01356  | 0.00386  | 0.00000  | 0.01169  |
| 52 | C4 | S   | -0.05992 | -0.03159 | -0.27160 | 0.00000  | 0.21100  |
| 53 | C4 | PX  | -0.13273 | 0.14943  | 0.20262  | 0.00000  | -0.05012 |
| 54 | C4 | PY  | 0.03681  | -0.00319 | 0.08662  | 0.00000  | -0.02290 |
| 55 | C4 | PZ  | 0.00000  | 0.00000  | 0.00000  | 0.00743  | 0.00000  |
| 56 | C4 | S   | -1.57040 | -2.57958 | 0.99230  | 0.00000  | -1.05173 |
| 57 | C4 | PX  | -0.10874 | -0.60283 | -2.27189 | 0.00000  | -0.18199 |
| 58 | C4 | PY  | -0.98423 | 0.65645  | 2.07045  | 0.00000  | 2.62256  |
| 59 | C4 | PZ  | 0.00000  | 0.00000  | 0.00000  | -0.23692 | 0.00000  |
| 60 | C4 | DXX | 0.05621  | 0.08204  | 0.21792  | 0.00000  | 0.05418  |
| 61 | C4 | DYY | -0.00396 | -0.01121 | -0.01206 | 0.00000  | 0.04858  |
| 62 | C4 | DZZ | -0.09088 | -0.07921 | -0.25609 | 0.00000  | -0.17682 |
| 63 | C4 | DXY | 0.06085  | 0.25109  | 0.13333  | 0.00000  | -0.17212 |
| 64 | C4 | DXZ | 0.00000  | 0.00000  | 0.00000  | -0.22570 | 0.00000  |
| 65 | C4 | DYZ | 0.00000  | 0.00000  | 0.00000  | 0.04719  | 0.00000  |
| 66 | C5 | S   | -0.00346 | -0.01136 | 0.02266  | 0.00000  | -0.01030 |
| 67 | C5 | S   | -0.09338 | -0.33730 | 0.08408  | 0.00000  | -0.13239 |
| 68 | C5 | PX  | -0.02960 | -0.14071 | -0.13890 | 0.00000  | 0.09555  |
| 69 | C5 | PY  | -0.02784 | -0.01203 | -0.11831 | 0.00000  | 0.07490  |
| 70 | C5 | PZ  | 0.00000  | 0.00000  | 0.00000  | -0.03768 | 0.00000  |
| 71 | C5 | S   | 1.07778  | 2.35907  | -1.61752 | 0.00000  | 1.68230  |
| 72 | C5 | PX  | -0.31146 | 0.82408  | -0.61103 | 0.00000  | 0.33090  |
| 73 | C5 | PY  | 0.40231  | -1.33629 | -0.57910 | 0.00000  | -1.51124 |
| 74 | C5 | PZ  | 0.00000  | 0.00000  | 0.00000  | 0.04699  | 0.00000  |
| 75 | C5 | DXX | 0.02595  | 0.18740  | 0.26238  | 0.00000  | -0.10495 |
| 76 | C5 | DYY | 0.09224  | -0.12665 | -0.16645 | 0.00000  | 0.10356  |
| 77 | C5 | DZZ | -0.16361 | -0.02398 | -0.13518 | 0.00000  | -0.00695 |
| 78 | C5 | DXY | -0.00292 | -0.00927 | 0.15535  | 0.00000  | 0.11165  |
| 79 | C5 | DXZ | 0.00000  | 0.00000  | 0.00000  | -0.07117 | 0.00000  |
| 80 | C5 | DYZ | 0.00000  | 0.00000  | 0.00000  | 0.01026  | 0.00000  |
| 81 | C6 | S   | -0.01956 | -0.03695 | 0.01610  | 0.00000  | -0.02773 |
| 82 | C6 | S   | -0.46839 | -0.31063 | -0.07208 | 0.00000  | -0.41972 |
| 83 | C6 | PX  | -0.29634 | -0.01067 | -0.03963 | 0.00000  | -0.14666 |
| 84 | C6 | PY  | 0.02175  | 0.07796  | -0.08085 | 0.00000  | 0.05143  |
| 85 | C6 | PZ  | 0.00000  | 0.00000  | 0.00000  | 0.00468  | 0.00000  |

|     |    |     |          |          |          |          |          |
|-----|----|-----|----------|----------|----------|----------|----------|
| 86  | C6 | S   | 0.74896  | 4.92261  | -0.85754 | 0.00000  | 2.94850  |
| 87  | C6 | PX  | 3.47371  | 3.80549  | 1.35323  | 0.00000  | 2.93571  |
| 88  | C6 | PY  | 1.81077  | -1.04675 | 0.15515  | 0.00000  | -0.61196 |
| 89  | C6 | PZ  | 0.00000  | 0.00000  | 0.00000  | 0.45460  | 0.00000  |
| 90  | C6 | DXX | 0.17530  | -0.16320 | 0.02764  | 0.00000  | 0.23644  |
| 91  | C6 | DYY | -0.10381 | 0.02439  | -0.09072 | 0.00000  | -0.13939 |
| 92  | C6 | DZZ | -0.08069 | 0.19921  | 0.04222  | 0.00000  | -0.01182 |
| 93  | C6 | DXY | 0.15134  | -0.01514 | 0.00561  | 0.00000  | 0.02107  |
| 94  | C6 | DXZ | 0.00000  | 0.00000  | 0.00000  | 0.23247  | 0.00000  |
| 95  | C6 | DYZ | 0.00000  | 0.00000  | 0.00000  | 0.10797  | 0.00000  |
| 96  | C7 | S   | -0.02561 | -0.03306 | -0.00325 | 0.00000  | -0.04075 |
| 97  | C7 | S   | -0.61724 | -0.46556 | -0.23577 | 0.00000  | -0.16601 |
| 98  | C7 | PX  | 0.17831  | -0.00891 | 0.03287  | 0.00000  | -0.15200 |
| 99  | C7 | PY  | 0.02746  | -0.11014 | 0.11935  | 0.00000  | -0.04144 |
| 100 | C7 | PZ  | 0.00000  | 0.00000  | 0.00000  | -0.02748 | 0.00000  |
| 101 | C7 | S   | 2.85837  | 5.31405  | 1.25287  | 0.00000  | 5.11123  |
| 102 | C7 | PX  | -2.63996 | -3.14134 | -0.59520 | 0.00000  | -2.57323 |
| 103 | C7 | PY  | -0.42153 | -0.34975 | -0.10347 | 0.00000  | 0.24508  |
| 104 | C7 | PZ  | 0.00000  | 0.00000  | 0.00000  | 0.59243  | 0.00000  |
| 105 | C7 | DXX | 0.02752  | -0.12835 | -0.05873 | 0.00000  | 0.13748  |
| 106 | C7 | DYY | 0.11769  | 0.01172  | 0.07021  | 0.00000  | -0.17717 |
| 107 | C7 | DZZ | -0.12555 | 0.16343  | 0.03745  | 0.00000  | 0.14348  |
| 108 | C7 | DXY | 0.13079  | -0.20453 | 0.16985  | 0.00000  | -0.14731 |
| 109 | C7 | DXZ | 0.00000  | 0.00000  | 0.00000  | -0.43207 | 0.00000  |
| 110 | C7 | DYZ | 0.00000  | 0.00000  | 0.00000  | 0.19020  | 0.00000  |
| 111 | O1 | S   | -0.05763 | -0.00178 | 0.04418  | 0.00000  | 0.03133  |
| 112 | O1 | S   | -0.78193 | -0.17534 | 0.74869  | 0.00000  | 0.43789  |
| 113 | O1 | PX  | -0.09522 | 0.00449  | -0.14016 | 0.00000  | -0.01551 |
| 114 | O1 | PY  | 0.08103  | 0.23142  | -0.11974 | 0.00000  | -0.17182 |
| 115 | O1 | PZ  | 0.00000  | 0.00000  | 0.00000  | 0.00973  | 0.00000  |
| 116 | O1 | S   | 2.74907  | 0.29491  | -2.71966 | 0.00000  | -1.88109 |
| 117 | O1 | PX  | 0.49055  | -0.12603 | 0.54307  | 0.00000  | 0.11576  |
| 118 | O1 | PY  | -0.49113 | -0.74541 | 0.91635  | 0.00000  | 0.91641  |
| 119 | O1 | PZ  | 0.00000  | 0.00000  | 0.00000  | -0.00855 | 0.00000  |
| 120 | O1 | DXX | -0.32759 | 0.05998  | 0.39227  | 0.00000  | 0.10067  |
| 121 | O1 | DYY | -0.25084 | -0.06651 | 0.29019  | 0.00000  | 0.17800  |
| 122 | O1 | DZZ | 0.01768  | -0.06624 | -0.19134 | 0.00000  | -0.01601 |
| 123 | O1 | DXY | 0.02611  | -0.10222 | -0.23070 | 0.00000  | 0.13118  |
| 124 | O1 | DXZ | 0.00000  | 0.00000  | 0.00000  | -0.15048 | 0.00000  |
| 125 | O1 | DYZ | 0.00000  | 0.00000  | 0.00000  | -0.15309 | 0.00000  |
| 126 | H4 | S   | -0.25746 | 0.09322  | 0.18628  | 0.00000  | 0.22275  |
| 127 | H4 | S   | -0.25951 | 0.38222  | 0.06122  | 0.00000  | 0.26451  |
| 128 | H4 | PX  | 0.04730  | -0.07815 | -0.13265 | 0.00000  | -0.01627 |
| 129 | H4 | PY  | 0.00397  | -0.06226 | -0.05955 | 0.00000  | 0.06567  |
| 130 | H4 | PZ  | 0.00000  | 0.00000  | 0.00000  | 0.03748  | 0.00000  |
| 131 | N1 | S   | -0.03781 | 0.05386  | -0.01068 | 0.00000  | 0.01365  |
| 132 | N1 | S   | -0.49112 | 0.56409  | -0.10941 | 0.00000  | 0.13969  |
| 133 | N1 | PX  | 0.08456  | -0.01806 | 0.08891  | 0.00000  | -0.02956 |
| 134 | N1 | PY  | -0.01982 | -0.06892 | -0.00829 | 0.00000  | 0.02635  |
| 135 | N1 | PZ  | 0.00000  | 0.00000  | 0.00000  | 0.03211  | 0.00000  |
| 136 | N1 | S   | 2.71623  | -3.21965 | 0.64585  | 0.00000  | -0.96737 |
| 137 | N1 | PX  | -0.37964 | -1.21221 | -0.36573 | 0.00000  | -0.47553 |
| 138 | N1 | PY  | 1.26511  | 0.01602  | 0.47881  | 0.00000  | 0.31147  |
| 139 | N1 | PZ  | 0.00000  | 0.00000  | 0.00000  | -0.04398 | 0.00000  |

|     |     |     |          |          |          |          |          |
|-----|-----|-----|----------|----------|----------|----------|----------|
| 140 | N1  | DXX | -0.10198 | 0.12334  | -0.09700 | 0.00000  | 0.22217  |
| 141 | N1  | DYY | -0.06362 | 0.02542  | -0.01897 | 0.00000  | -0.09688 |
| 142 | N1  | DZZ | -0.01327 | 0.02734  | 0.10784  | 0.00000  | -0.07688 |
| 143 | N1  | DXY | -0.24342 | -0.02922 | -0.07525 | 0.00000  | -0.03767 |
| 144 | N1  | DXZ | 0.00000  | 0.00000  | 0.00000  | 0.09051  | 0.00000  |
| 145 | N1  | DYZ | 0.00000  | 0.00000  | 0.00000  | -0.20354 | 0.00000  |
| 146 | H6  | S   | -0.21959 | -0.16069 | 0.17855  | 0.00000  | 0.04915  |
| 147 | H6  | S   | -0.37741 | -0.50846 | 0.05504  | 0.00000  | -0.25545 |
| 148 | H6  | PX  | 0.02269  | 0.00485  | -0.07138 | 0.00000  | -0.02751 |
| 149 | H6  | PY  | -0.05362 | -0.02451 | -0.02898 | 0.00000  | -0.06372 |
| 150 | H6  | PZ  | 0.00000  | 0.00000  | 0.00000  | 0.00742  | 0.00000  |
| 151 | C8  | S   | 0.02196  | 0.02079  | 0.01376  | 0.00000  | 0.00844  |
| 152 | C8  | S   | 0.11055  | 0.59617  | 0.09381  | 0.00000  | 0.24401  |
| 153 | C8  | PX  | -0.03287 | 0.02380  | -0.05848 | 0.00000  | 0.07374  |
| 154 | C8  | PY  | -0.09972 | 0.21029  | -0.09768 | 0.00000  | 0.16669  |
| 155 | C8  | PZ  | 0.00000  | 0.00000  | 0.00000  | -0.01769 | 0.00000  |
| 156 | C8  | S   | -1.59171 | -1.40113 | -0.61659 | 0.00000  | -0.81212 |
| 157 | C8  | PX  | -0.34136 | -2.39707 | -0.27558 | 0.00000  | -1.20472 |
| 158 | C8  | PY  | -2.19811 | -2.75568 | -0.10204 | 0.00000  | -3.17120 |
| 159 | C8  | PZ  | 0.00000  | 0.00000  | 0.00000  | -0.39478 | 0.00000  |
| 160 | C8  | DXX | 0.24502  | 0.14046  | 0.07842  | 0.00000  | 0.04411  |
| 161 | C8  | DYY | -0.04858 | -0.18139 | -0.05080 | 0.00000  | -0.00696 |
| 162 | C8  | DZZ | -0.26958 | 0.08222  | -0.03080 | 0.00000  | -0.06965 |
| 163 | C8  | DXY | 0.10922  | -0.14347 | 0.18549  | 0.00000  | -0.34206 |
| 164 | C8  | DXZ | 0.00000  | 0.00000  | 0.00000  | -0.12092 | 0.00000  |
| 165 | C8  | DYZ | 0.00000  | 0.00000  | 0.00000  | -0.08632 | 0.00000  |
| 166 | H8  | S   | 0.27341  | 0.26092  | 0.07871  | 0.00000  | -0.03590 |
| 167 | H8  | S   | 0.72590  | 0.66012  | 0.07460  | 0.00000  | 0.60466  |
| 168 | H8  | PX  | 0.05971  | 0.04874  | 0.05117  | 0.00000  | 0.01455  |
| 169 | H8  | PY  | 0.05328  | -0.15815 | 0.13337  | 0.00000  | -0.04120 |
| 170 | H8  | PZ  | 0.00000  | 0.00000  | 0.00000  | -0.25810 | 0.00000  |
| 171 | C10 | S   | -0.00968 | 0.00742  | -0.00345 | 0.00000  | 0.00374  |
| 172 | C10 | S   | -0.09720 | 0.01645  | 0.00606  | 0.00000  | -0.11704 |
| 173 | C10 | PX  | 0.02566  | -0.06013 | 0.02663  | 0.00000  | -0.03224 |
| 174 | C10 | PY  | -0.04340 | -0.03203 | 0.05673  | 0.00000  | -0.20323 |
| 175 | C10 | PZ  | 0.00000  | 0.00000  | 0.00000  | -0.00895 | 0.00000  |
| 176 | C10 | S   | -0.82189 | -1.27583 | 0.18309  | 0.00000  | -1.75730 |
| 177 | C10 | PX  | 0.30374  | 1.49318  | 0.11266  | 0.00000  | 0.86807  |
| 178 | C10 | PY  | -0.42899 | -0.18857 | 0.02126  | 0.00000  | -0.44100 |
| 179 | C10 | PZ  | 0.00000  | 0.00000  | 0.00000  | 0.17644  | 0.00000  |
| 180 | C10 | DXX | 0.18124  | -0.02434 | 0.10830  | 0.00000  | -0.07608 |
| 181 | C10 | DYY | -0.03297 | -0.03282 | -0.08347 | 0.00000  | 0.10982  |
| 182 | C10 | DZZ | -0.16646 | 0.10168  | 0.00001  | 0.00000  | -0.08044 |
| 183 | C10 | DXY | 0.03032  | 0.15130  | -0.07213 | 0.00000  | 0.22473  |
| 184 | C10 | DXZ | 0.00000  | 0.00000  | 0.00000  | -0.05276 | 0.00000  |
| 185 | C10 | DYZ | 0.00000  | 0.00000  | 0.00000  | 0.21613  | 0.00000  |
| 186 | H16 | S   | -0.16312 | -0.11662 | -0.16277 | 0.00000  | 0.09435  |
| 187 | H16 | S   | -0.08668 | -0.46007 | 0.01547  | 0.00000  | -0.31654 |
| 188 | H16 | PX  | -0.02594 | 0.02848  | -0.03840 | 0.00000  | 0.05477  |
| 189 | H16 | PY  | 0.05332  | 0.01223  | 0.03832  | 0.00000  | -0.02553 |
| 190 | H16 | PZ  | 0.00000  | 0.00000  | 0.00000  | -0.05409 | 0.00000  |
| 191 | H18 | S   | -0.07205 | 0.14321  | 0.05328  | 0.00000  | -0.05727 |
| 192 | H18 | S   | 0.01140  | 0.47442  | -0.00808 | 0.00000  | 0.31061  |

|     |     |     |          |          |          |          |          |
|-----|-----|-----|----------|----------|----------|----------|----------|
| 193 | H18 | PX  | -0.02974 | -0.02161 | -0.06524 | 0.00000  | 0.07039  |
| 194 | H18 | PY  | 0.06063  | 0.05749  | 0.02486  | 0.00000  | 0.04550  |
| 195 | H18 | PZ  | 0.00000  | 0.00000  | 0.00000  | -0.07067 | 0.00000  |
| 196 | C9  | S   | 0.02235  | -0.00710 | -0.02380 | 0.00000  | 0.00776  |
| 197 | C9  | S   | 0.26556  | -0.01795 | -0.28826 | 0.00000  | 0.03869  |
| 198 | C9  | PX  | 0.08222  | -0.04296 | 0.04885  | 0.00000  | 0.03835  |
| 199 | C9  | PY  | 0.01108  | -0.00436 | 0.05331  | 0.00000  | -0.02238 |
| 200 | C9  | PZ  | 0.00000  | 0.00000  | 0.00000  | 0.00622  | 0.00000  |
| 201 | C9  | S   | -1.24455 | 0.32265  | 0.55968  | 0.00000  | -0.21714 |
| 202 | C9  | PX  | 0.22658  | -0.26653 | 0.03223  | 0.00000  | 0.13574  |
| 203 | C9  | PY  | 0.27810  | 0.14373  | -0.20047 | 0.00000  | -0.01304 |
| 204 | C9  | PZ  | 0.00000  | 0.00000  | 0.00000  | 0.12362  | 0.00000  |
| 205 | C9  | DXX | 0.02964  | 0.15804  | -0.13671 | 0.00000  | -0.05399 |
| 206 | C9  | DYY | -0.09019 | -0.06322 | 0.14065  | 0.00000  | 0.01224  |
| 207 | C9  | DZZ | 0.06480  | -0.09212 | -0.04586 | 0.00000  | 0.01953  |
| 208 | C9  | DXY | -0.13743 | -0.11995 | 0.04306  | 0.00000  | 0.13047  |
| 209 | C9  | DXZ | 0.00000  | 0.00000  | 0.00000  | 0.02521  | 0.00000  |
| 210 | C9  | DYZ | 0.00000  | 0.00000  | 0.00000  | -0.05684 | 0.00000  |
| 211 | H3  | S   | 0.13263  | -0.08223 | -0.13510 | 0.00000  | 0.08020  |
| 212 | H3  | S   | 0.06284  | -0.08895 | 0.03811  | 0.00000  | -0.01309 |
| 213 | H3  | PX  | -0.08092 | -0.15055 | 0.01286  | 0.00000  | 0.12924  |
| 214 | H3  | PY  | 0.01139  | -0.02649 | -0.04476 | 0.00000  | 0.03725  |
| 215 | H3  | PZ  | 0.00000  | 0.00000  | 0.00000  | 0.02424  | 0.00000  |
| 216 | H5  | S   | 0.08440  | 0.00085  | -0.03417 | 0.06195  | 0.02934  |
| 217 | H5  | S   | 0.17209  | 0.03433  | -0.13043 | 0.03865  | -0.05227 |
| 218 | H5  | PX  | 0.03023  | 0.07611  | -0.02956 | 0.07033  | -0.05022 |
| 219 | H5  | PY  | 0.03074  | 0.03617  | -0.01901 | 0.07033  | -0.01467 |
| 220 | H5  | PZ  | 0.02305  | 0.03512  | -0.02572 | -0.00068 | -0.02844 |
| 221 | H7  | S   | 0.08440  | 0.00085  | -0.03417 | -0.06195 | 0.02934  |
| 222 | H7  | S   | 0.17209  | 0.03433  | -0.13043 | -0.03865 | -0.05227 |
| 223 | H7  | PX  | 0.03023  | 0.07611  | -0.02956 | -0.07033 | -0.05022 |
| 224 | H7  | PY  | 0.03074  | 0.03617  | -0.01901 | -0.07033 | -0.01467 |
| 225 | H7  | PZ  | -0.02305 | -0.03512 | 0.02572  | -0.00068 | 0.02844  |

|              |          |          |          |          |          |
|--------------|----------|----------|----------|----------|----------|
| MO:          | 141      | 142      | 143      | 144      | 145      |
| Eigenvalues: | 2.16374  | 2.16713  | 2.17488  | 2.17972  | 2.21319  |
| (ev):        | 58.87839 | 58.97055 | 59.18163 | 59.31313 | 60.22393 |

|    |    |     |          |          |          |          |          |
|----|----|-----|----------|----------|----------|----------|----------|
|    |    | A   | A        | A        | A        | A        |          |
| 1  | H1 | S   | 0.17763  | 0.00000  | 0.22691  | -0.32980 | 0.00000  |
| 2  | H1 | S   | -0.51849 | 0.00000  | 0.29965  | -0.06370 | 0.00000  |
| 3  | H1 | PX  | 0.08963  | 0.00000  | 0.05662  | -0.03069 | 0.00000  |
| 4  | H1 | PY  | 0.01433  | 0.00000  | 0.00184  | -0.12010 | 0.00000  |
| 5  | H1 | PZ  | 0.00000  | -0.17654 | 0.00000  | 0.00000  | -0.07086 |
| 6  | C1 | S   | 0.01484  | 0.00000  | 0.00385  | -0.00212 | 0.00000  |
| 7  | C1 | S   | 0.21476  | 0.00000  | -0.26185 | 0.13677  | 0.00000  |
| 8  | C1 | PX  | -0.07084 | 0.00000  | 0.09117  | 0.04394  | 0.00000  |
| 9  | C1 | PY  | -0.14740 | 0.00000  | 0.03492  | -0.28627 | 0.00000  |
| 10 | C1 | PZ  | 0.00000  | 0.01409  | 0.00000  | 0.00000  | 0.02604  |
| 11 | C1 | S   | -1.00866 | 0.00000  | -1.32729 | -0.22142 | 0.00000  |
| 12 | C1 | PX  | 1.18872  | 0.00000  | -0.78791 | 0.56419  | 0.00000  |
| 13 | C1 | PY  | 0.12823  | 0.00000  | 0.32984  | 0.45213  | 0.00000  |
| 14 | C1 | PZ  | 0.00000  | 0.29955  | 0.00000  | 0.00000  | 0.09289  |
| 15 | C1 | DXX | -0.25805 | 0.00000  | -0.03253 | 0.22211  | 0.00000  |

|    |    |     |          |          |          |          |          |
|----|----|-----|----------|----------|----------|----------|----------|
| 16 | C1 | DYY | 0.16253  | 0.00000  | 0.07574  | -0.18841 | 0.00000  |
| 17 | C1 | DZZ | 0.14687  | 0.00000  | -0.01151 | -0.04794 | 0.00000  |
| 18 | C1 | DXY | -0.12071 | 0.00000  | -0.14835 | 0.01066  | 0.00000  |
| 19 | C1 | DXZ | 0.00000  | -0.33103 | 0.00000  | 0.00000  | -0.15910 |
| 20 | C1 | DYZ | 0.00000  | 0.20695  | 0.00000  | 0.00000  | 0.16736  |
| 21 | C2 | S   | 0.00370  | 0.00000  | 0.02714  | 0.00961  | 0.00000  |
| 22 | C2 | S   | 0.09322  | 0.00000  | 0.41730  | -0.10509 | 0.00000  |
| 23 | C2 | PX  | 0.10347  | 0.00000  | 0.10261  | -0.07807 | 0.00000  |
| 24 | C2 | PY  | -0.02725 | 0.00000  | -0.02777 | 0.04794  | 0.00000  |
| 25 | C2 | PZ  | 0.00000  | 0.04100  | 0.00000  | 0.00000  | -0.01664 |
| 26 | C2 | S   | 0.23103  | 0.00000  | -1.61310 | -0.84827 | 0.00000  |
| 27 | C2 | PX  | -0.06229 | 0.00000  | -1.79777 | 0.13401  | 0.00000  |
| 28 | C2 | PY  | 0.99189  | 0.00000  | -1.27371 | 0.19627  | 0.00000  |
| 29 | C2 | PZ  | 0.00000  | 0.15897  | 0.00000  | 0.00000  | -0.17268 |
| 30 | C2 | DXX | -0.19397 | 0.00000  | -0.00375 | -0.20007 | 0.00000  |
| 31 | C2 | DYY | 0.14294  | 0.00000  | -0.01651 | 0.19980  | 0.00000  |
| 32 | C2 | DZZ | 0.10767  | 0.00000  | -0.03507 | -0.00844 | 0.00000  |
| 33 | C2 | DXY | -0.01936 | 0.00000  | -0.09052 | -0.25694 | 0.00000  |
| 34 | C2 | DXZ | 0.00000  | 0.28900  | 0.00000  | 0.00000  | -0.15069 |
| 35 | C2 | DYZ | 0.00000  | -0.30696 | 0.00000  | 0.00000  | 0.02768  |
| 36 | C3 | S   | -0.00463 | 0.00000  | 0.03487  | -0.01246 | 0.00000  |
| 37 | C3 | S   | -0.44673 | 0.00000  | 0.71360  | -0.10667 | 0.00000  |
| 38 | C3 | PX  | 0.10126  | 0.00000  | -0.10456 | -0.03832 | 0.00000  |
| 39 | C3 | PY  | 0.08747  | 0.00000  | -0.32422 | 0.17174  | 0.00000  |
| 40 | C3 | PZ  | 0.00000  | 0.00993  | 0.00000  | 0.00000  | 0.00895  |
| 41 | C3 | S   | 3.79486  | 0.00000  | -5.27719 | 0.82740  | 0.00000  |
| 42 | C3 | PX  | -0.69916 | 0.00000  | 1.85011  | -0.59696 | 0.00000  |
| 43 | C3 | PY  | -2.16063 | 0.00000  | 3.59313  | -0.51620 | 0.00000  |
| 44 | C3 | PZ  | 0.00000  | 0.11195  | 0.00000  | 0.00000  | 0.04388  |
| 45 | C3 | DXX | 0.01136  | 0.00000  | -0.02602 | 0.22995  | 0.00000  |
| 46 | C3 | DYY | -0.02284 | 0.00000  | -0.01939 | -0.16297 | 0.00000  |
| 47 | C3 | DZZ | 0.07022  | 0.00000  | 0.06162  | -0.04916 | 0.00000  |
| 48 | C3 | DXY | 0.08066  | 0.00000  | 0.17239  | -0.25588 | 0.00000  |
| 49 | C3 | DXZ | 0.00000  | -0.28929 | 0.00000  | 0.00000  | 0.06338  |
| 50 | C3 | DYZ | 0.00000  | -0.13679 | 0.00000  | 0.00000  | -0.09794 |
| 51 | C4 | S   | 0.01042  | 0.00000  | 0.02244  | 0.00291  | 0.00000  |
| 52 | C4 | S   | -0.19777 | 0.00000  | 0.17250  | -0.04731 | 0.00000  |
| 53 | C4 | PX  | -0.00379 | 0.00000  | -0.13322 | 0.08780  | 0.00000  |
| 54 | C4 | PY  | 0.12520  | 0.00000  | 0.05093  | -0.00884 | 0.00000  |
| 55 | C4 | PZ  | 0.00000  | -0.10475 | 0.00000  | 0.00000  | -0.03043 |
| 56 | C4 | S   | -0.02677 | 0.00000  | -2.36528 | -0.04804 | 0.00000  |
| 57 | C4 | PX  | 0.28051  | 0.00000  | 1.49114  | 0.25397  | 0.00000  |
| 58 | C4 | PY  | -2.97318 | 0.00000  | 0.18486  | -0.33591 | 0.00000  |
| 59 | C4 | PZ  | 0.00000  | -0.54353 | 0.00000  | 0.00000  | -0.18606 |
| 60 | C4 | DXX | 0.26443  | 0.00000  | 0.02136  | -0.01744 | 0.00000  |
| 61 | C4 | DYY | -0.42375 | 0.00000  | -0.09287 | 0.02216  | 0.00000  |
| 62 | C4 | DZZ | 0.25839  | 0.00000  | 0.04449  | -0.01457 | 0.00000  |
| 63 | C4 | DXY | -0.03349 | 0.00000  | -0.15617 | -0.12697 | 0.00000  |
| 64 | C4 | DXZ | 0.00000  | 0.07951  | 0.00000  | 0.00000  | -0.07170 |
| 65 | C4 | DYZ | 0.00000  | 0.13231  | 0.00000  | 0.00000  | 0.01659  |
| 66 | C5 | S   | 0.01714  | 0.00000  | -0.02271 | -0.00426 | 0.00000  |
| 67 | C5 | S   | -0.13016 | 0.00000  | -0.27802 | -0.03478 | 0.00000  |
| 68 | C5 | PX  | -0.11943 | 0.00000  | 0.01866  | 0.14271  | 0.00000  |
| 69 | C5 | PY  | 0.03135  | 0.00000  | 0.00522  | 0.10864  | 0.00000  |

|     |    |     |          |          |          |          |          |
|-----|----|-----|----------|----------|----------|----------|----------|
| 70  | C5 | PZ  | 0.00000  | 0.03086  | 0.00000  | 0.00000  | -0.00134 |
| 71  | C5 | S   | -1.02198 | 0.00000  | 3.49724  | 0.22159  | 0.00000  |
| 72  | C5 | PX  | 0.14250  | 0.00000  | 1.31114  | 0.07908  | 0.00000  |
| 73  | C5 | PY  | 1.07829  | 0.00000  | -0.90316 | -0.31857 | 0.00000  |
| 74  | C5 | PZ  | 0.00000  | 0.23641  | 0.00000  | 0.00000  | 0.14979  |
| 75  | C5 | DXX | -0.05968 | 0.00000  | -0.06693 | -0.06352 | 0.00000  |
| 76  | C5 | DYY | -0.04655 | 0.00000  | 0.04410  | -0.02657 | 0.00000  |
| 77  | C5 | DZZ | 0.11449  | 0.00000  | 0.12104  | 0.12685  | 0.00000  |
| 78  | C5 | DXY | 0.25713  | 0.00000  | 0.05784  | 0.25466  | 0.00000  |
| 79  | C5 | DXZ | 0.00000  | 0.41017  | 0.00000  | 0.00000  | 0.02564  |
| 80  | C5 | DYZ | 0.00000  | 0.11767  | 0.00000  | 0.00000  | -0.08237 |
| 81  | C6 | S   | 0.02447  | 0.00000  | -0.02474 | 0.00591  | 0.00000  |
| 82  | C6 | S   | 0.18714  | 0.00000  | -0.50177 | -0.22561 | 0.00000  |
| 83  | C6 | PX  | 0.04851  | 0.00000  | -0.10652 | 0.04783  | 0.00000  |
| 84  | C6 | PY  | -0.07072 | 0.00000  | 0.03800  | -0.10119 | 0.00000  |
| 85  | C6 | PZ  | 0.00000  | -0.09362 | 0.00000  | 0.00000  | 0.02908  |
| 86  | C6 | S   | -1.19706 | 0.00000  | 4.45622  | -0.65287 | 0.00000  |
| 87  | C6 | PX  | -1.61570 | 0.00000  | 2.66825  | -1.09255 | 0.00000  |
| 88  | C6 | PY  | 0.25322  | 0.00000  | 0.11165  | 0.52167  | 0.00000  |
| 89  | C6 | PZ  | 0.00000  | -0.40499 | 0.00000  | 0.00000  | 0.15008  |
| 90  | C6 | DXX | 0.06972  | 0.00000  | -0.09656 | 0.16566  | 0.00000  |
| 91  | C6 | DYY | -0.08363 | 0.00000  | -0.02176 | -0.07466 | 0.00000  |
| 92  | C6 | DZZ | 0.03430  | 0.00000  | 0.17476  | -0.11118 | 0.00000  |
| 93  | C6 | DXY | 0.14674  | 0.00000  | -0.15124 | -0.16340 | 0.00000  |
| 94  | C6 | DXZ | 0.00000  | 0.04169  | 0.00000  | 0.00000  | -0.10773 |
| 95  | C6 | DYZ | 0.00000  | -0.17887 | 0.00000  | 0.00000  | 0.04298  |
| 96  | C7 | S   | 0.02848  | 0.00000  | -0.02117 | -0.00915 | 0.00000  |
| 97  | C7 | S   | 0.47412  | 0.00000  | -0.47359 | -0.15256 | 0.00000  |
| 98  | C7 | PX  | -0.11969 | 0.00000  | 0.04166  | -0.01231 | 0.00000  |
| 99  | C7 | PY  | -0.01109 | 0.00000  | 0.12634  | -0.20331 | 0.00000  |
| 100 | C7 | PZ  | 0.00000  | 0.01462  | 0.00000  | 0.00000  | -0.01663 |
| 101 | C7 | S   | -3.93981 | 0.00000  | 5.14135  | 0.51475  | 0.00000  |
| 102 | C7 | PX  | 2.23350  | 0.00000  | -3.02092 | -0.48979 | 0.00000  |
| 103 | C7 | PY  | 0.00720  | 0.00000  | -0.43066 | 0.30554  | 0.00000  |
| 104 | C7 | PZ  | 0.00000  | 0.01013  | 0.00000  | 0.00000  | -0.25570 |
| 105 | C7 | DXX | -0.06315 | 0.00000  | 0.14233  | -0.25933 | 0.00000  |
| 106 | C7 | DYY | -0.04217 | 0.00000  | -0.15894 | 0.26877  | 0.00000  |
| 107 | C7 | DZZ | 0.13452  | 0.00000  | 0.10701  | -0.00328 | 0.00000  |
| 108 | C7 | DXY | -0.00835 | 0.00000  | 0.14342  | 0.00149  | 0.00000  |
| 109 | C7 | DXZ | 0.00000  | -0.02430 | 0.00000  | 0.00000  | 0.21424  |
| 110 | C7 | DYZ | 0.00000  | -0.10053 | 0.00000  | 0.00000  | 0.18096  |
| 111 | O1 | S   | -0.05934 | 0.00000  | -0.01379 | -0.00725 | 0.00000  |
| 112 | O1 | S   | -0.52991 | 0.00000  | -0.26741 | -0.20666 | 0.00000  |
| 113 | O1 | PX  | 0.01077  | 0.00000  | 0.05576  | 0.05061  | 0.00000  |
| 114 | O1 | PY  | -0.11179 | 0.00000  | -0.03679 | 0.02060  | 0.00000  |
| 115 | O1 | PZ  | 0.00000  | -0.08389 | 0.00000  | 0.00000  | 0.09096  |
| 116 | O1 | S   | 2.70098  | 0.00000  | 0.86170  | 0.61075  | 0.00000  |
| 117 | O1 | PX  | -0.05230 | 0.00000  | -0.29551 | -0.14704 | 0.00000  |
| 118 | O1 | PY  | -0.83815 | 0.00000  | -0.25116 | -0.17709 | 0.00000  |
| 119 | O1 | PZ  | 0.00000  | 0.22127  | 0.00000  | 0.00000  | -0.16057 |
| 120 | O1 | DXX | -0.10089 | 0.00000  | -0.12177 | -0.07677 | 0.00000  |
| 121 | O1 | DYY | -0.33040 | 0.00000  | -0.12943 | -0.07470 | 0.00000  |
| 122 | O1 | DZZ | 0.11255  | 0.00000  | 0.10508  | 0.03579  | 0.00000  |
| 123 | O1 | DXY | -0.09137 | 0.00000  | 0.19415  | 0.08414  | 0.00000  |

|     |     |     |          |          |          |          |          |
|-----|-----|-----|----------|----------|----------|----------|----------|
| 124 | O1  | DXZ | 0.00000  | -0.00187 | 0.00000  | 0.00000  | -0.52813 |
| 125 | O1  | DYZ | 0.00000  | -0.36607 | 0.00000  | 0.00000  | -0.21113 |
| 126 | H4  | S   | 0.17321  | 0.00000  | 0.11985  | 0.29457  | 0.00000  |
| 127 | H4  | S   | -0.21268 | 0.00000  | 0.28493  | -0.00979 | 0.00000  |
| 128 | H4  | PX  | -0.07109 | 0.00000  | -0.02154 | -0.06172 | 0.00000  |
| 129 | H4  | PY  | 0.03957  | 0.00000  | 0.05855  | 0.09498  | 0.00000  |
| 130 | H4  | PZ  | 0.00000  | -0.10687 | 0.00000  | 0.00000  | -0.07675 |
| 131 | N1  | S   | -0.00349 | 0.00000  | 0.00888  | -0.00812 | 0.00000  |
| 132 | N1  | S   | -0.05711 | 0.00000  | 0.51193  | -0.21174 | 0.00000  |
| 133 | N1  | PX  | 0.03919  | 0.00000  | 0.23807  | -0.11218 | 0.00000  |
| 134 | N1  | PY  | 0.12407  | 0.00000  | -0.06707 | 0.04059  | 0.00000  |
| 135 | N1  | PZ  | 0.00000  | -0.11003 | 0.00000  | 0.00000  | 0.07413  |
| 136 | N1  | S   | 0.59194  | 0.00000  | -1.45956 | 0.99564  | 0.00000  |
| 137 | N1  | PX  | 0.32650  | 0.00000  | -0.78165 | 0.56799  | 0.00000  |
| 138 | N1  | PY  | -0.51741 | 0.00000  | 0.23623  | 0.23036  | 0.00000  |
| 139 | N1  | PZ  | 0.00000  | 0.28544  | 0.00000  | 0.00000  | -0.24860 |
| 140 | N1  | DXX | -0.09924 | 0.00000  | -0.00750 | 0.16556  | 0.00000  |
| 141 | N1  | DYY | -0.02999 | 0.00000  | 0.01792  | -0.10296 | 0.00000  |
| 142 | N1  | DZZ | 0.14484  | 0.00000  | 0.13842  | -0.05182 | 0.00000  |
| 143 | N1  | DXY | -0.11653 | 0.00000  | 0.14994  | 0.31141  | 0.00000  |
| 144 | N1  | DXZ | 0.00000  | 0.18983  | 0.00000  | 0.00000  | -0.28725 |
| 145 | N1  | DYZ | 0.00000  | 0.28185  | 0.00000  | 0.00000  | -0.05206 |
| 146 | H6  | S   | 0.18983  | 0.00000  | -0.22078 | 0.34358  | 0.00000  |
| 147 | H6  | S   | -0.00190 | 0.00000  | -0.61456 | 0.02509  | 0.00000  |
| 148 | H6  | PX  | -0.06259 | 0.00000  | 0.02284  | -0.12534 | 0.00000  |
| 149 | H6  | PY  | -0.06219 | 0.00000  | 0.01236  | 0.03426  | 0.00000  |
| 150 | H6  | PZ  | 0.00000  | -0.10628 | 0.00000  | 0.00000  | 0.10425  |
| 151 | C8  | S   | 0.00379  | 0.00000  | 0.02205  | -0.00043 | 0.00000  |
| 152 | C8  | S   | -0.04681 | 0.00000  | 0.36320  | -0.05460 | 0.00000  |
| 153 | C8  | PX  | -0.02965 | 0.00000  | -0.08546 | -0.01301 | 0.00000  |
| 154 | C8  | PY  | 0.01129  | 0.00000  | 0.16877  | -0.04643 | 0.00000  |
| 155 | C8  | PZ  | 0.00000  | -0.03450 | 0.00000  | 0.00000  | 0.06904  |
| 156 | C8  | S   | 0.77233  | 0.00000  | -1.36579 | -0.20244 | 0.00000  |
| 157 | C8  | PX  | 1.23507  | 0.00000  | -1.43423 | 0.08582  | 0.00000  |
| 158 | C8  | PY  | 1.81042  | 0.00000  | -2.73687 | -0.88397 | 0.00000  |
| 159 | C8  | PZ  | 0.00000  | -0.16952 | 0.00000  | 0.00000  | 0.43555  |
| 160 | C8  | DXX | -0.07491 | 0.00000  | -0.22323 | -0.00242 | 0.00000  |
| 161 | C8  | DYY | -0.11212 | 0.00000  | 0.12854  | 0.02936  | 0.00000  |
| 162 | C8  | DZZ | 0.23945  | 0.00000  | 0.11878  | -0.01715 | 0.00000  |
| 163 | C8  | DXY | -0.05580 | 0.00000  | 0.17703  | -0.00036 | 0.00000  |
| 164 | C8  | DXZ | 0.00000  | -0.02334 | 0.00000  | 0.00000  | 0.07708  |
| 165 | C8  | DYZ | 0.00000  | 0.01056  | 0.00000  | 0.00000  | -0.00379 |
| 166 | H8  | S   | -0.05865 | 0.00000  | 0.06336  | 0.30185  | 0.00000  |
| 167 | H8  | S   | -0.51416 | 0.00000  | 0.69522  | 0.03204  | 0.00000  |
| 168 | H8  | PX  | -0.00399 | 0.00000  | 0.00994  | 0.09913  | 0.00000  |
| 169 | H8  | PY  | -0.02126 | 0.00000  | 0.09958  | -0.08923 | 0.00000  |
| 170 | H8  | PZ  | 0.00000  | 0.02632  | 0.00000  | 0.00000  | 0.14593  |
| 171 | C10 | S   | 0.00897  | 0.00000  | 0.01024  | 0.00183  | 0.00000  |
| 172 | C10 | S   | 0.13512  | 0.00000  | -0.01885 | -0.05316 | 0.00000  |
| 173 | C10 | PX  | -0.02188 | 0.00000  | 0.03180  | 0.00887  | 0.00000  |
| 174 | C10 | PY  | 0.13202  | 0.00000  | -0.08934 | -0.08401 | 0.00000  |
| 175 | C10 | PZ  | 0.00000  | 0.00221  | 0.00000  | 0.00000  | -0.01138 |
| 176 | C10 | S   | 0.67635  | 0.00000  | -1.44600 | -0.57304 | 0.00000  |
| 177 | C10 | PX  | -0.93708 | 0.00000  | 1.24851  | 0.31112  | 0.00000  |



|     |     |     |          |          |          |          |          |
|-----|-----|-----|----------|----------|----------|----------|----------|
| 178 | C10 | PY  | 0.14443  | 0.00000  | -0.18040 | -0.12077 | 0.00000  |
| 179 | C10 | PZ  | 0.00000  | 0.10143  | 0.00000  | 0.00000  | -0.23894 |
| 180 | C10 | DXX | -0.15772 | 0.00000  | 0.00151  | 0.05696  | 0.00000  |
| 181 | C10 | DYY | 0.01829  | 0.00000  | -0.07928 | -0.04139 | 0.00000  |
| 182 | C10 | DZZ | 0.22137  | 0.00000  | 0.08431  | -0.02182 | 0.00000  |
| 183 | C10 | DXY | 0.05301  | 0.00000  | -0.26734 | -0.04772 | 0.00000  |
| 184 | C10 | DXZ | 0.00000  | -0.02138 | 0.00000  | 0.00000  | 0.06118  |
| 185 | C10 | DYZ | 0.00000  | 0.14884  | 0.00000  | 0.00000  | -0.31038 |
| 186 | H16 | S   | 0.30279  | 0.00000  | -0.29484 | -0.12333 | 0.00000  |
| 187 | H16 | S   | 0.24931  | 0.00000  | -0.28172 | -0.02941 | 0.00000  |
| 188 | H16 | PX  | 0.08459  | 0.00000  | -0.13786 | -0.02236 | 0.00000  |
| 189 | H16 | PY  | -0.00947 | 0.00000  | -0.09866 | 0.01717  | 0.00000  |
| 190 | H16 | PZ  | 0.00000  | -0.03630 | 0.00000  | 0.00000  | 0.09577  |
| 191 | H18 | S   | -0.11194 | 0.00000  | 0.47404  | 0.08268  | 0.00000  |
| 192 | H18 | S   | -0.23997 | 0.00000  | 0.27457  | 0.10213  | 0.00000  |
| 193 | H18 | PX  | 0.06139  | 0.00000  | -0.14559 | -0.02598 | 0.00000  |
| 194 | H18 | PY  | -0.05656 | 0.00000  | -0.02542 | 0.00880  | 0.00000  |
| 195 | H18 | PZ  | 0.00000  | -0.06147 | 0.00000  | 0.00000  | 0.12699  |
| 196 | C9  | S   | -0.00530 | 0.00000  | 0.01647  | 0.01416  | 0.00000  |
| 197 | C9  | S   | -0.02777 | 0.00000  | 0.13743  | 0.11371  | 0.00000  |
| 198 | C9  | PX  | 0.02996  | 0.00000  | 0.00936  | -0.01604 | 0.00000  |
| 199 | C9  | PY  | 0.06966  | 0.00000  | -0.00548 | -0.03595 | 0.00000  |
| 200 | C9  | PZ  | 0.00000  | -0.00001 | 0.00000  | 0.00000  | 0.03746  |
| 201 | C9  | S   | -0.06514 | 0.00000  | -0.33730 | -0.22133 | 0.00000  |
| 202 | C9  | PX  | -0.04888 | 0.00000  | -0.03045 | -0.02016 | 0.00000  |
| 203 | C9  | PY  | -0.11415 | 0.00000  | 0.11941  | 0.20463  | 0.00000  |
| 204 | C9  | PZ  | 0.00000  | 0.06083  | 0.00000  | 0.00000  | 0.29296  |
| 205 | C9  | DXX | 0.00558  | 0.00000  | 0.09298  | 0.06281  | 0.00000  |
| 206 | C9  | DYY | -0.01701 | 0.00000  | -0.07786 | -0.03070 | 0.00000  |
| 207 | C9  | DZZ | 0.00920  | 0.00000  | -0.00279 | -0.00408 | 0.00000  |
| 208 | C9  | DXY | -0.10949 | 0.00000  | 0.02555  | 0.01527  | 0.00000  |
| 209 | C9  | DXZ | 0.00000  | 0.11252  | 0.00000  | 0.00000  | 0.09306  |
| 210 | C9  | DYZ | 0.00000  | -0.05278 | 0.00000  | 0.00000  | -0.20117 |
| 211 | H3  | S   | -0.01692 | 0.00000  | 0.08275  | 0.02397  | 0.00000  |
| 212 | H3  | S   | 0.10566  | 0.00000  | -0.03386 | -0.07637 | 0.00000  |
| 213 | H3  | PX  | -0.14990 | 0.00000  | 0.01713  | 0.01220  | 0.00000  |
| 214 | H3  | PY  | -0.04498 | 0.00000  | 0.03449  | 0.02302  | 0.00000  |
| 215 | H3  | PZ  | 0.00000  | -0.00093 | 0.00000  | 0.00000  | -0.02264 |
| 216 | H5  | S   | -0.03317 | 0.09517  | 0.04111  | 0.06799  | 0.20963  |
| 217 | H5  | S   | 0.09288  | -0.02413 | 0.05001  | 0.00466  | -0.00844 |
| 218 | H5  | PX  | 0.06999  | 0.03451  | 0.02447  | 0.01792  | 0.25349  |
| 219 | H5  | PY  | 0.01970  | 0.00748  | 0.00527  | 0.00755  | 0.16822  |
| 220 | H5  | PZ  | 0.02756  | -0.02004 | 0.00943  | 0.00873  | 0.01942  |
| 221 | H7  | S   | -0.03317 | -0.09517 | 0.04111  | 0.06799  | -0.20963 |
| 222 | H7  | S   | 0.09288  | 0.02413  | 0.05001  | 0.00466  | 0.00844  |
| 223 | H7  | PX  | 0.06999  | -0.03451 | 0.02447  | 0.01792  | -0.25349 |
| 224 | H7  | PY  | 0.01970  | -0.00748 | 0.00527  | 0.00755  | -0.16822 |
| 225 | H7  | PZ  | -0.02756 | -0.02004 | -0.00943 | -0.00873 | 0.01942  |

|              |          |          |          |          |          |
|--------------|----------|----------|----------|----------|----------|
| MO:          | 146      | 147      | 148      | 149      | 150      |
| Eigenvalues: | 2.22326  | 2.23489  | 2.28694  | 2.28708  | 2.29163  |
| (ev):        | 60.49797 | 60.81459 | 62.23095 | 62.23476 | 62.35851 |

A

A

A

A

A

|    |    |     |          |          |          |          |          |
|----|----|-----|----------|----------|----------|----------|----------|
| 1  | H1 | S   | 0.00000  | -0.14262 | 0.05545  | 0.00000  | -0.32355 |
| 2  | H1 | S   | 0.00000  | 0.10920  | 0.02209  | 0.00000  | -0.15533 |
| 3  | H1 | PX  | 0.00000  | 0.00743  | 0.02900  | 0.00000  | -0.17584 |
| 4  | H1 | PY  | 0.00000  | -0.04910 | -0.08020 | 0.00000  | 0.10110  |
| 5  | H1 | PZ  | -0.10012 | 0.00000  | 0.00000  | -0.17317 | 0.00000  |
| 6  | C1 | S   | 0.00000  | -0.01564 | -0.01127 | 0.00000  | -0.00923 |
| 7  | C1 | S   | 0.00000  | 0.08324  | -0.11613 | 0.00000  | -0.17923 |
| 8  | C1 | PX  | 0.00000  | -0.07662 | 0.05182  | 0.00000  | 0.01184  |
| 9  | C1 | PY  | 0.00000  | -0.01172 | -0.09587 | 0.00000  | 0.12565  |
| 10 | C1 | PZ  | -0.04574 | 0.00000  | 0.00000  | 0.04721  | 0.00000  |
| 11 | C1 | S   | 0.00000  | 1.23753  | 0.09068  | 0.00000  | 0.62291  |
| 12 | C1 | PX  | 0.00000  | -0.32440 | -0.02964 | 0.00000  | 0.77007  |
| 13 | C1 | PY  | 0.00000  | 0.41149  | -0.73678 | 0.00000  | -1.12088 |
| 14 | C1 | PZ  | 0.37905  | 0.00000  | 0.00000  | 0.21300  | 0.00000  |
| 15 | C1 | DXX | 0.00000  | 0.11449  | 0.04976  | 0.00000  | 0.14000  |
| 16 | C1 | DYY | 0.00000  | -0.12222 | 0.04634  | 0.00000  | 0.08658  |
| 17 | C1 | DZZ | 0.00000  | 0.03181  | -0.11426 | 0.00000  | -0.29991 |
| 18 | C1 | DXY | 0.00000  | -0.01598 | -0.09458 | 0.00000  | 0.31565  |
| 19 | C1 | DXZ | -0.16008 | 0.00000  | 0.00000  | -0.12043 | 0.00000  |
| 20 | C1 | DYZ | -0.01069 | 0.00000  | 0.00000  | -0.17838 | 0.00000  |
| 21 | C2 | S   | 0.00000  | -0.01021 | -0.01557 | 0.00000  | 0.01791  |
| 22 | C2 | S   | 0.00000  | 0.02991  | -0.02704 | 0.00000  | 0.20309  |
| 23 | C2 | PX  | 0.00000  | 0.02400  | 0.05183  | 0.00000  | 0.05392  |
| 24 | C2 | PY  | 0.00000  | -0.04283 | 0.11349  | 0.00000  | 0.03087  |
| 25 | C2 | PZ  | -0.00270 | 0.00000  | 0.00000  | 0.05408  | 0.00000  |
| 26 | C2 | S   | 0.00000  | 0.02461  | 1.46213  | 0.00000  | -0.58117 |
| 27 | C2 | PX  | 0.00000  | 0.27605  | 0.54060  | 0.00000  | 0.19349  |
| 28 | C2 | PY  | 0.00000  | 0.13986  | -0.35456 | 0.00000  | 0.55505  |
| 29 | C2 | PZ  | -0.60043 | 0.00000  | 0.00000  | 0.30111  | 0.00000  |
| 30 | C2 | DXX | 0.00000  | -0.11521 | 0.18901  | 0.00000  | -0.32451 |
| 31 | C2 | DYY | 0.00000  | 0.11906  | -0.09810 | 0.00000  | 0.04077  |
| 32 | C2 | DZZ | 0.00000  | -0.03716 | -0.04459 | 0.00000  | 0.40468  |
| 33 | C2 | DXY | 0.00000  | 0.15704  | -0.22375 | 0.00000  | -0.06573 |
| 34 | C2 | DXZ | -0.37202 | 0.00000  | 0.00000  | 0.20171  | 0.00000  |
| 35 | C2 | DYZ | -0.09878 | 0.00000  | 0.00000  | 0.12251  | 0.00000  |
| 36 | C3 | S   | 0.00000  | -0.00385 | -0.00558 | 0.00000  | -0.00981 |
| 37 | C3 | S   | 0.00000  | 0.01130  | -0.10471 | 0.00000  | -0.30696 |
| 38 | C3 | PX  | 0.00000  | 0.10261  | -0.04779 | 0.00000  | 0.25933  |
| 39 | C3 | PY  | 0.00000  | 0.13823  | 0.17075  | 0.00000  | -0.02023 |
| 40 | C3 | PZ  | 0.02248  | 0.00000  | 0.00000  | -0.06661 | 0.00000  |
| 41 | C3 | S   | 0.00000  | -0.31730 | 0.69871  | 0.00000  | 0.63687  |
| 42 | C3 | PX  | 0.00000  | -0.22680 | -0.08602 | 0.00000  | -1.27629 |
| 43 | C3 | PY  | 0.00000  | -0.26922 | -1.68604 | 0.00000  | -1.26735 |
| 44 | C3 | PZ  | -0.38881 | 0.00000  | 0.00000  | -0.10073 | 0.00000  |
| 45 | C3 | DXX | 0.00000  | 0.18989  | 0.06226  | 0.00000  | -0.09192 |
| 46 | C3 | DYY | 0.00000  | -0.15143 | -0.08921 | 0.00000  | 0.20949  |
| 47 | C3 | DZZ | 0.00000  | -0.02753 | 0.02492  | 0.00000  | -0.16339 |
| 48 | C3 | DXY | 0.00000  | -0.00935 | 0.07548  | 0.00000  | -0.02873 |
| 49 | C3 | DXZ | 0.11844  | 0.00000  | 0.00000  | -0.04162 | 0.00000  |
| 50 | C3 | DYZ | 0.02549  | 0.00000  | 0.00000  | -0.24228 | 0.00000  |
| 51 | C4 | S   | 0.00000  | -0.01272 | -0.01064 | 0.00000  | -0.01157 |
| 52 | C4 | S   | 0.00000  | -0.14827 | -0.29194 | 0.00000  | -0.06457 |
| 53 | C4 | PX  | 0.00000  | -0.03507 | 0.03600  | 0.00000  | 0.15596  |
| 54 | C4 | PY  | 0.00000  | -0.02753 | 0.20076  | 0.00000  | -0.01163 |

|     |    |     |          |          |          |          |          |
|-----|----|-----|----------|----------|----------|----------|----------|
| 55  | C4 | PZ  | -0.03058 | 0.00000  | 0.00000  | -0.01952 | 0.00000  |
| 56  | C4 | S   | 0.00000  | -0.30986 | 0.44543  | 0.00000  | 1.61324  |
| 57  | C4 | PX  | 0.00000  | -1.10601 | 1.07104  | 0.00000  | 0.01006  |
| 58  | C4 | PY  | 0.00000  | 0.55712  | -0.71487 | 0.00000  | -0.24502 |
| 59  | C4 | PZ  | -0.57581 | 0.00000  | 0.00000  | -0.04072 | 0.00000  |
| 60  | C4 | DXX | 0.00000  | -0.00175 | -0.02875 | 0.00000  | -0.11008 |
| 61  | C4 | DYY | 0.00000  | 0.16341  | 0.19599  | 0.00000  | 0.16438  |
| 62  | C4 | DZZ | 0.00000  | -0.20820 | -0.28547 | 0.00000  | 0.00202  |
| 63  | C4 | DXY | 0.00000  | 0.13209  | -0.00216 | 0.00000  | 0.09184  |
| 64  | C4 | DXZ | 0.19865  | 0.00000  | 0.00000  | -0.21192 | 0.00000  |
| 65  | C4 | DYZ | 0.05764  | 0.00000  | 0.00000  | 0.04857  | 0.00000  |
| 66  | C5 | S   | 0.00000  | -0.00483 | -0.01189 | 0.00000  | 0.02199  |
| 67  | C5 | S   | 0.00000  | -0.27282 | 0.01389  | 0.00000  | 0.31286  |
| 68  | C5 | PX  | 0.00000  | -0.06786 | 0.02057  | 0.00000  | 0.13724  |
| 69  | C5 | PY  | 0.00000  | 0.16745  | -0.08260 | 0.00000  | 0.00507  |
| 70  | C5 | PZ  | 0.01363  | 0.00000  | 0.00000  | -0.03900 | 0.00000  |
| 71  | C5 | S   | 0.00000  | -0.34653 | 0.38336  | 0.00000  | -1.13048 |
| 72  | C5 | PX  | 0.00000  | -0.14358 | 0.14150  | 0.00000  | -0.56951 |
| 73  | C5 | PY  | 0.00000  | -0.70230 | 1.05220  | 0.00000  | 0.29609  |
| 74  | C5 | PZ  | 0.61032  | 0.00000  | 0.00000  | -0.23353 | 0.00000  |
| 75  | C5 | DXX | 0.00000  | -0.01733 | 0.34243  | 0.00000  | -0.06001 |
| 76  | C5 | DYY | 0.00000  | 0.11661  | -0.16752 | 0.00000  | -0.12644 |
| 77  | C5 | DZZ | 0.00000  | -0.19297 | -0.15833 | 0.00000  | 0.21443  |
| 78  | C5 | DXY | 0.00000  | -0.09927 | -0.07877 | 0.00000  | 0.11292  |
| 79  | C5 | DXZ | 0.33381  | 0.00000  | 0.00000  | 0.01329  | 0.00000  |
| 80  | C5 | DYZ | -0.22428 | 0.00000  | 0.00000  | 0.25059  | 0.00000  |
| 81  | C6 | S   | 0.00000  | -0.00822 | 0.00963  | 0.00000  | 0.01492  |
| 82  | C6 | S   | 0.00000  | -0.09486 | -0.06074 | 0.00000  | 0.18128  |
| 83  | C6 | PX  | 0.00000  | -0.14946 | 0.00417  | 0.00000  | 0.16987  |
| 84  | C6 | PY  | 0.00000  | 0.14807  | -0.02822 | 0.00000  | 0.09276  |
| 85  | C6 | PZ  | 0.03261  | 0.00000  | 0.00000  | -0.02195 | 0.00000  |
| 86  | C6 | S   | 0.00000  | 0.44052  | -0.86673 | 0.00000  | -1.31187 |
| 87  | C6 | PX  | 0.00000  | 0.29657  | 0.35912  | 0.00000  | -1.33146 |
| 88  | C6 | PY  | 0.00000  | -1.03465 | -0.59231 | 0.00000  | 0.59692  |
| 89  | C6 | PZ  | 0.55354  | 0.00000  | 0.00000  | -0.12485 | 0.00000  |
| 90  | C6 | DXX | 0.00000  | 0.13158  | -0.03655 | 0.00000  | 0.08737  |
| 91  | C6 | DYY | 0.00000  | -0.08033 | -0.01462 | 0.00000  | -0.16385 |
| 92  | C6 | DZZ | 0.00000  | -0.02727 | -0.05126 | 0.00000  | 0.07726  |
| 93  | C6 | DXY | 0.00000  | 0.13688  | -0.00497 | 0.00000  | 0.08181  |
| 94  | C6 | DXZ | -0.07557 | 0.00000  | 0.00000  | 0.30208  | 0.00000  |
| 95  | C6 | DYZ | 0.10995  | 0.00000  | 0.00000  | -0.02602 | 0.00000  |
| 96  | C7 | S   | 0.00000  | -0.00552 | 0.01671  | 0.00000  | -0.00647 |
| 97  | C7 | S   | 0.00000  | -0.00599 | 0.21415  | 0.00000  | -0.24068 |
| 98  | C7 | PX  | 0.00000  | -0.06307 | -0.07705 | 0.00000  | 0.19865  |
| 99  | C7 | PY  | 0.00000  | -0.13142 | 0.07705  | 0.00000  | 0.03032  |
| 100 | C7 | PZ  | -0.00198 | 0.00000  | 0.00000  | -0.03157 | 0.00000  |
| 101 | C7 | S   | 0.00000  | 0.67845  | -1.81043 | 0.00000  | -0.37445 |
| 102 | C7 | PX  | 0.00000  | -0.47447 | 1.01594  | 0.00000  | 0.24962  |
| 103 | C7 | PY  | 0.00000  | 0.20844  | -0.19031 | 0.00000  | 0.21167  |
| 104 | C7 | PZ  | 0.06569  | 0.00000  | 0.00000  | -0.18427 | 0.00000  |
| 105 | C7 | DXX | 0.00000  | 0.07335  | -0.10877 | 0.00000  | 0.15703  |
| 106 | C7 | DYY | 0.00000  | -0.00417 | 0.10476  | 0.00000  | -0.11339 |
| 107 | C7 | DZZ | 0.00000  | -0.03304 | 0.06131  | 0.00000  | -0.16364 |
| 108 | C7 | DXY | 0.00000  | 0.09858  | 0.04856  | 0.00000  | -0.02590 |

|     |    |     |          |          |          |          |          |
|-----|----|-----|----------|----------|----------|----------|----------|
| 109 | C7 | DXZ | -0.01253 | 0.00000  | 0.00000  | 0.17405  | 0.00000  |
| 110 | C7 | DYZ | 0.13680  | 0.00000  | 0.00000  | 0.38342  | 0.00000  |
| 111 | O1 | S   | 0.00000  | -0.00087 | 0.00592  | 0.00000  | 0.01867  |
| 112 | O1 | S   | 0.00000  | -0.17456 | -0.16914 | 0.00000  | 0.16099  |
| 113 | O1 | PX  | 0.00000  | -0.07638 | -0.01933 | 0.00000  | 0.08736  |
| 114 | O1 | PY  | 0.00000  | 0.18982  | -0.00852 | 0.00000  | 0.08114  |
| 115 | O1 | PZ  | -0.14290 | 0.00000  | 0.00000  | -0.07038 | 0.00000  |
| 116 | O1 | S   | 0.00000  | 0.17012  | 0.36439  | 0.00000  | -0.70638 |
| 117 | O1 | PX  | 0.00000  | 0.34458  | -0.09333 | 0.00000  | -0.34453 |
| 118 | O1 | PY  | 0.00000  | -0.18218 | 0.15829  | 0.00000  | 0.00598  |
| 119 | O1 | PZ  | 0.35488  | 0.00000  | 0.00000  | 0.13747  | 0.00000  |
| 120 | O1 | DXX | 0.00000  | 0.08385  | -0.21205 | 0.00000  | -0.01294 |
| 121 | O1 | DYY | 0.00000  | 0.01881  | 0.02111  | 0.00000  | 0.04634  |
| 122 | O1 | DZZ | 0.00000  | -0.19774 | 0.09725  | 0.00000  | 0.05424  |
| 123 | O1 | DXY | 0.00000  | -0.20744 | 0.34796  | 0.00000  | 0.02648  |
| 124 | O1 | DXZ | 0.38158  | 0.00000  | 0.00000  | 0.26644  | 0.00000  |
| 125 | O1 | DYZ | -0.20639 | 0.00000  | 0.00000  | -0.01321 | 0.00000  |
| 126 | H4 | S   | 0.00000  | -0.04077 | -0.25563 | 0.00000  | 0.13418  |
| 127 | H4 | S   | 0.00000  | 0.21070  | -0.18691 | 0.00000  | -0.22905 |
| 128 | H4 | PX  | 0.00000  | 0.05707  | -0.05829 | 0.00000  | -0.06410 |
| 129 | H4 | PY  | 0.00000  | -0.03109 | -0.10870 | 0.00000  | 0.01214  |
| 130 | H4 | PZ  | -0.30750 | 0.00000  | 0.00000  | 0.17430  | 0.00000  |
| 131 | N1 | S   | 0.00000  | -0.00261 | 0.00184  | 0.00000  | -0.01192 |
| 132 | N1 | S   | 0.00000  | 0.11416  | -0.00346 | 0.00000  | 0.07831  |
| 133 | N1 | PX  | 0.00000  | 0.10745  | -0.01187 | 0.00000  | 0.16143  |
| 134 | N1 | PY  | 0.00000  | -0.00027 | 0.06176  | 0.00000  | 0.17205  |
| 135 | N1 | PZ  | 0.08147  | 0.00000  | 0.00000  | 0.04574  | 0.00000  |
| 136 | N1 | S   | 0.00000  | -0.19365 | 0.14197  | 0.00000  | 0.62420  |
| 137 | N1 | PX  | 0.00000  | 0.23397  | 0.07848  | 0.00000  | 0.06391  |
| 138 | N1 | PY  | 0.00000  | -0.22015 | -0.27617 | 0.00000  | -0.09102 |
| 139 | N1 | PZ  | -0.28508 | 0.00000  | 0.00000  | -0.09803 | 0.00000  |
| 140 | N1 | DXX | 0.00000  | 0.10466  | -0.12484 | 0.00000  | -0.13111 |
| 141 | N1 | DYY | 0.00000  | -0.02221 | 0.06576  | 0.00000  | 0.09370  |
| 142 | N1 | DZZ | 0.00000  | -0.01896 | 0.08005  | 0.00000  | 0.08051  |
| 143 | N1 | DXY | 0.00000  | 0.08447  | -0.14249 | 0.00000  | -0.24711 |
| 144 | N1 | DXZ | -0.16591 | 0.00000  | 0.00000  | -0.27708 | 0.00000  |
| 145 | N1 | DYZ | -0.22851 | 0.00000  | 0.00000  | 0.14154  | 0.00000  |
| 146 | H6 | S   | 0.00000  | 0.06676  | -0.05414 | 0.00000  | 0.37777  |
| 147 | H6 | S   | 0.00000  | 0.10865  | 0.05190  | 0.00000  | 0.04620  |
| 148 | H6 | PX  | 0.00000  | 0.02643  | -0.04708 | 0.00000  | -0.13825 |
| 149 | H6 | PY  | 0.00000  | -0.09897 | 0.10092  | 0.00000  | -0.03079 |
| 150 | H6 | PZ  | 0.31567  | 0.00000  | 0.00000  | -0.19892 | 0.00000  |
| 151 | C8 | S   | 0.00000  | 0.01236  | 0.02005  | 0.00000  | 0.00093  |
| 152 | C8 | S   | 0.00000  | -0.18351 | 0.05039  | 0.00000  | -0.04822 |
| 153 | C8 | PX  | 0.00000  | -0.09911 | -0.08694 | 0.00000  | 0.09224  |
| 154 | C8 | PY  | 0.00000  | 0.27013  | 0.09022  | 0.00000  | 0.04629  |
| 155 | C8 | PZ  | 0.03569  | 0.00000  | 0.00000  | 0.08933  | 0.00000  |
| 156 | C8 | S   | 0.00000  | -0.06457 | 0.20905  | 0.00000  | -0.04628 |
| 157 | C8 | PX  | 0.00000  | 0.58701  | 0.80044  | 0.00000  | 0.26896  |
| 158 | C8 | PY  | 0.00000  | -1.99822 | 0.02995  | 0.00000  | 0.58477  |
| 159 | C8 | PZ  | 0.13333  | 0.00000  | 0.00000  | 0.43544  | 0.00000  |
| 160 | C8 | DXX | 0.00000  | -0.26843 | 0.03895  | 0.00000  | -0.03501 |
| 161 | C8 | DYY | 0.00000  | 0.20651  | -0.13312 | 0.00000  | 0.01877  |
| 162 | C8 | DZZ | 0.00000  | -0.02009 | 0.15449  | 0.00000  | 0.00379  |

|     |     |     |          |          |          |          |          |
|-----|-----|-----|----------|----------|----------|----------|----------|
| 163 | C8  | DXY | 0.00000  | -0.10297 | 0.05700  | 0.00000  | 0.15612  |
| 164 | C8  | DXZ | -0.01594 | 0.00000  | 0.00000  | 0.18346  | 0.00000  |
| 165 | C8  | DYZ | -0.03582 | 0.00000  | 0.00000  | -0.03745 | 0.00000  |
| 166 | H8  | S   | 0.00000  | 0.01534  | 0.04206  | 0.00000  | -0.15275 |
| 167 | H8  | S   | 0.00000  | 0.12594  | -0.29576 | 0.00000  | 0.02778  |
| 168 | H8  | PX  | 0.00000  | 0.00516  | 0.03844  | 0.00000  | -0.10481 |
| 169 | H8  | PY  | 0.00000  | -0.00766 | -0.04340 | 0.00000  | -0.01071 |
| 170 | H8  | PZ  | -0.02374 | 0.00000  | 0.00000  | 0.15561  | 0.00000  |
| 171 | C10 | S   | 0.00000  | 0.00967  | 0.02038  | 0.00000  | 0.00144  |
| 172 | C10 | S   | 0.00000  | -0.04722 | 0.21398  | 0.00000  | 0.07172  |
| 173 | C10 | PX  | 0.00000  | 0.02769  | 0.02086  | 0.00000  | -0.03776 |
| 174 | C10 | PY  | 0.00000  | -0.14991 | 0.12029  | 0.00000  | 0.07034  |
| 175 | C10 | PZ  | -0.00790 | 0.00000  | 0.00000  | -0.02986 | 0.00000  |
| 176 | C10 | S   | 0.00000  | -1.57495 | -0.55195 | 0.00000  | 0.31208  |
| 177 | C10 | PX  | 0.00000  | 0.03730  | -0.61483 | 0.00000  | -0.00989 |
| 178 | C10 | PY  | 0.00000  | -0.00865 | -0.14183 | 0.00000  | 0.20492  |
| 179 | C10 | PZ  | -0.08641 | 0.00000  | 0.00000  | -0.26461 | 0.00000  |
| 180 | C10 | DXX | 0.00000  | -0.39387 | -0.25250 | 0.00000  | -0.04440 |
| 181 | C10 | DYY | 0.00000  | 0.24288  | 0.01467  | 0.00000  | -0.02289 |
| 182 | C10 | DZZ | 0.00000  | 0.16786  | 0.38877  | 0.00000  | 0.10693  |
| 183 | C10 | DXY | 0.00000  | -0.20136 | 0.05644  | 0.00000  | -0.14908 |
| 184 | C10 | DXZ | 0.01857  | 0.00000  | 0.00000  | 0.06973  | 0.00000  |
| 185 | C10 | DYZ | -0.12634 | 0.00000  | 0.00000  | -0.32850 | 0.00000  |
| 186 | H16 | S   | 0.00000  | 0.25310  | 0.35354  | 0.00000  | -0.02913 |
| 187 | H16 | S   | 0.00000  | 0.04068  | 0.19553  | 0.00000  | 0.01448  |
| 188 | H16 | PX  | 0.00000  | -0.01216 | 0.13923  | 0.00000  | -0.05190 |
| 189 | H16 | PY  | 0.00000  | -0.28081 | -0.01383 | 0.00000  | -0.09046 |
| 190 | H16 | PZ  | 0.04198  | 0.00000  | 0.00000  | 0.10888  | 0.00000  |
| 191 | H18 | S   | 0.00000  | 0.32680  | 0.02719  | 0.00000  | 0.15364  |
| 192 | H18 | S   | 0.00000  | 0.03711  | -0.17355 | 0.00000  | -0.01726 |
| 193 | H18 | PX  | 0.00000  | 0.06668  | 0.12033  | 0.00000  | -0.06208 |
| 194 | H18 | PY  | 0.00000  | -0.23026 | -0.18226 | 0.00000  | -0.05516 |
| 195 | H18 | PZ  | 0.05313  | 0.00000  | 0.00000  | 0.18007  | 0.00000  |
| 196 | C9  | S   | 0.00000  | 0.00322  | 0.00616  | 0.00000  | -0.01362 |
| 197 | C9  | S   | 0.00000  | 0.01309  | 0.02957  | 0.00000  | -0.04230 |
| 198 | C9  | PX  | 0.00000  | 0.01703  | 0.04176  | 0.00000  | -0.09452 |
| 199 | C9  | PY  | 0.00000  | 0.01301  | 0.01643  | 0.00000  | -0.03352 |
| 200 | C9  | PZ  | -0.03611 | 0.00000  | 0.00000  | -0.01701 | 0.00000  |
| 201 | C9  | S   | 0.00000  | -0.20096 | -0.19854 | 0.00000  | 0.53428  |
| 202 | C9  | PX  | 0.00000  | -0.00741 | 0.06689  | 0.00000  | -0.05241 |
| 203 | C9  | PY  | 0.00000  | 0.22057  | -0.22671 | 0.00000  | -0.26607 |
| 204 | C9  | PZ  | -0.12269 | 0.00000  | 0.00000  | -0.13082 | 0.00000  |
| 205 | C9  | DXX | 0.00000  | 0.01321  | 0.08145  | 0.00000  | 0.01664  |
| 206 | C9  | DYY | 0.00000  | 0.05813  | -0.18403 | 0.00000  | -0.08522 |
| 207 | C9  | DZZ | 0.00000  | -0.06211 | 0.10129  | 0.00000  | 0.05658  |
| 208 | C9  | DXY | 0.00000  | -0.07499 | 0.12355  | 0.00000  | 0.03186  |
| 209 | C9  | DXZ | 0.06043  | 0.00000  | 0.00000  | -0.05714 | 0.00000  |
| 210 | C9  | DYZ | 0.08081  | 0.00000  | 0.00000  | 0.09321  | 0.00000  |
| 211 | H3  | S   | 0.00000  | -0.08852 | 0.24417  | 0.00000  | 0.06265  |
| 212 | H3  | S   | 0.00000  | -0.02414 | 0.02218  | 0.00000  | 0.00261  |
| 213 | H3  | PX  | 0.00000  | -0.12255 | 0.20387  | 0.00000  | 0.04465  |
| 214 | H3  | PY  | 0.00000  | -0.04177 | 0.14033  | 0.00000  | 0.03897  |
| 215 | H3  | PZ  | 0.01672  | 0.00000  | 0.00000  | 0.08726  | 0.00000  |
| 216 | H5  | S   | -0.04518 | 0.07523  | -0.05001 | -0.10269 | -0.10195 |

|     |    |    |          |          |          |          |          |
|-----|----|----|----------|----------|----------|----------|----------|
| 217 | H5 | S  | -0.00978 | 0.00703  | 0.03150  | 0.02199  | -0.03996 |
| 218 | H5 | PX | -0.15578 | 0.04413  | -0.05476 | -0.14918 | -0.03883 |
| 219 | H5 | PY | -0.10848 | 0.04504  | -0.01555 | -0.02798 | 0.00730  |
| 220 | H5 | PZ | -0.05101 | 0.00688  | -0.00682 | -0.03433 | 0.00314  |
| 221 | H7 | S  | 0.04518  | 0.07523  | -0.05001 | 0.10269  | -0.10195 |
| 222 | H7 | S  | 0.00978  | 0.00703  | 0.03150  | -0.02199 | -0.03996 |
| 223 | H7 | PX | 0.15578  | 0.04413  | -0.05476 | 0.14918  | -0.03883 |
| 224 | H7 | PY | 0.10848  | 0.04504  | -0.01555 | 0.02798  | 0.00730  |
| 225 | H7 | PZ | -0.05101 | -0.00688 | 0.00682  | -0.03433 | -0.00314 |

|              |          |          |          |          |          |
|--------------|----------|----------|----------|----------|----------|
| M0:          | 151      | 152      | 153      | 154      | 155      |
| Eigenvalues: | 2.31790  | 2.32310  | 2.34457  | 2.34735  | 2.35830  |
| (ev):        | 63.07317 | 63.21490 | 63.79889 | 63.87459 | 64.17265 |

|    |    |     | A        | A        | A        | A        | A        |
|----|----|-----|----------|----------|----------|----------|----------|
| 1  | H1 | S   | -0.10218 | 0.00000  | -0.04429 | 0.15793  | 0.00000  |
| 2  | H1 | S   | -0.05713 | 0.00000  | -0.05055 | 0.04742  | 0.00000  |
| 3  | H1 | PX  | -0.03593 | 0.00000  | -0.02036 | 0.03362  | 0.00000  |
| 4  | H1 | PY  | 0.00104  | 0.00000  | 0.00266  | -0.03762 | 0.00000  |
| 5  | H1 | PZ  | 0.00000  | 0.01196  | 0.00000  | 0.00000  | 0.10022  |
| 6  | C1 | S   | -0.01126 | 0.00000  | 0.01630  | -0.00818 | 0.00000  |
| 7  | C1 | S   | -0.09348 | 0.00000  | 0.30023  | -0.14682 | 0.00000  |
| 8  | C1 | PX  | 0.04051  | 0.00000  | -0.16126 | 0.00947  | 0.00000  |
| 9  | C1 | PY  | -0.01030 | 0.00000  | 0.13040  | -0.00369 | 0.00000  |
| 10 | C1 | PZ  | 0.00000  | 0.02198  | 0.00000  | 0.00000  | -0.00188 |
| 11 | C1 | S   | 1.06292  | 0.00000  | -2.09647 | 0.45790  | 0.00000  |
| 12 | C1 | PX  | 0.14116  | 0.00000  | 0.68630  | -0.35288 | 0.00000  |
| 13 | C1 | PY  | -0.42762 | 0.00000  | 0.12908  | -0.86313 | 0.00000  |
| 14 | C1 | PZ  | 0.00000  | -0.09559 | 0.00000  | 0.00000  | -0.14130 |
| 15 | C1 | DXX | 0.00667  | 0.00000  | 0.13099  | -0.04157 | 0.00000  |
| 16 | C1 | DYY | 0.06462  | 0.00000  | -0.09748 | 0.09182  | 0.00000  |
| 17 | C1 | DZZ | -0.13955 | 0.00000  | 0.01468  | -0.05834 | 0.00000  |
| 18 | C1 | DXY | 0.08181  | 0.00000  | -0.08337 | -0.03060 | 0.00000  |
| 19 | C1 | DXZ | 0.00000  | 0.03043  | 0.00000  | 0.00000  | 0.05965  |
| 20 | C1 | DYZ | 0.00000  | 0.04740  | 0.00000  | 0.00000  | -0.04512 |
| 21 | C2 | S   | -0.02246 | 0.00000  | 0.01662  | -0.01739 | 0.00000  |
| 22 | C2 | S   | -0.38735 | 0.00000  | 0.27070  | -0.20345 | 0.00000  |
| 23 | C2 | PX  | -0.12490 | 0.00000  | 0.01627  | -0.03188 | 0.00000  |
| 24 | C2 | PY  | -0.08303 | 0.00000  | 0.16912  | -0.11372 | 0.00000  |
| 25 | C2 | PZ  | 0.00000  | -0.01003 | 0.00000  | 0.00000  | 0.01162  |
| 26 | C2 | S   | 1.07827  | 0.00000  | -1.22323 | 0.48053  | 0.00000  |
| 27 | C2 | PX  | 1.34448  | 0.00000  | -0.56250 | 0.29786  | 0.00000  |
| 28 | C2 | PY  | 1.15707  | 0.00000  | -0.62651 | -0.02070 | 0.00000  |
| 29 | C2 | PZ  | 0.00000  | -0.01861 | 0.00000  | 0.00000  | 0.06138  |
| 30 | C2 | DXX | -0.13714 | 0.00000  | -0.10269 | 0.10378  | 0.00000  |
| 31 | C2 | DYY | 0.25548  | 0.00000  | 0.05018  | 0.06160  | 0.00000  |
| 32 | C2 | DZZ | -0.19259 | 0.00000  | 0.08446  | -0.23037 | 0.00000  |
| 33 | C2 | DXY | 0.13216  | 0.00000  | -0.11690 | 0.00798  | 0.00000  |
| 34 | C2 | DXZ | 0.00000  | -0.01331 | 0.00000  | 0.00000  | 0.01922  |
| 35 | C2 | DYZ | 0.00000  | -0.02544 | 0.00000  | 0.00000  | 0.05879  |
| 36 | C3 | S   | -0.01042 | 0.00000  | 0.00985  | -0.00356 | 0.00000  |
| 37 | C3 | S   | -0.22571 | 0.00000  | 0.12268  | -0.13996 | 0.00000  |
| 38 | C3 | PX  | -0.01797 | 0.00000  | 0.14780  | -0.05489 | 0.00000  |
| 39 | C3 | PY  | 0.17636  | 0.00000  | -0.13586 | 0.08516  | 0.00000  |

|    |    |     |          |          |          |          |          |
|----|----|-----|----------|----------|----------|----------|----------|
| 40 | C3 | PZ  | 0.00000  | 0.00086  | 0.00000  | 0.00000  | -0.01781 |
| 41 | C3 | S   | 3.21289  | 0.00000  | 0.67411  | -1.36979 | 0.00000  |
| 42 | C3 | PX  | -0.65456 | 0.00000  | 0.23230  | -0.54183 | 0.00000  |
| 43 | C3 | PY  | -2.53555 | 0.00000  | 0.98940  | -0.03694 | 0.00000  |
| 44 | C3 | PZ  | 0.00000  | 0.09392  | 0.00000  | 0.00000  | 0.07759  |
| 45 | C3 | DXX | -0.16036 | 0.00000  | 0.05850  | 0.00835  | 0.00000  |
| 46 | C3 | DYY | 0.02649  | 0.00000  | -0.10878 | 0.04205  | 0.00000  |
| 47 | C3 | DZZ | 0.11817  | 0.00000  | 0.17438  | -0.15187 | 0.00000  |
| 48 | C3 | DXY | 0.07713  | 0.00000  | 0.22726  | -0.05501 | 0.00000  |
| 49 | C3 | DXZ | 0.00000  | -0.00296 | 0.00000  | 0.00000  | 0.06194  |
| 50 | C3 | DYZ | 0.00000  | 0.02331  | 0.00000  | 0.00000  | 0.04422  |
| 51 | C4 | S   | -0.02974 | 0.00000  | -0.00278 | 0.00500  | 0.00000  |
| 52 | C4 | S   | -0.22169 | 0.00000  | -0.21590 | 0.06718  | 0.00000  |
| 53 | C4 | PX  | 0.01206  | 0.00000  | -0.17415 | -0.06744 | 0.00000  |
| 54 | C4 | PY  | 0.02050  | 0.00000  | 0.03219  | -0.07813 | 0.00000  |
| 55 | C4 | PZ  | 0.00000  | 0.00388  | 0.00000  | 0.00000  | 0.03028  |
| 56 | C4 | S   | 1.07872  | 0.00000  | 0.45565  | -0.21355 | 0.00000  |
| 57 | C4 | PX  | -0.60658 | 0.00000  | 1.18946  | 1.15878  | 0.00000  |
| 58 | C4 | PY  | -0.54962 | 0.00000  | -0.18739 | 1.06320  | 0.00000  |
| 59 | C4 | PZ  | 0.00000  | 0.03984  | 0.00000  | 0.00000  | 0.05086  |
| 60 | C4 | DXX | 0.04904  | 0.00000  | -0.26377 | 0.04764  | 0.00000  |
| 61 | C4 | DYY | 0.17046  | 0.00000  | 0.22940  | -0.12615 | 0.00000  |
| 62 | C4 | DZZ | -0.25109 | 0.00000  | 0.01934  | 0.01751  | 0.00000  |
| 63 | C4 | DXY | 0.01077  | 0.00000  | 0.11859  | -0.01135 | 0.00000  |
| 64 | C4 | DXZ | 0.00000  | 0.03461  | 0.00000  | 0.00000  | -0.03599 |
| 65 | C4 | DYZ | 0.00000  | 0.03010  | 0.00000  | 0.00000  | -0.20498 |
| 66 | C5 | S   | -0.01252 | 0.00000  | -0.00377 | -0.01859 | 0.00000  |
| 67 | C5 | S   | -0.26033 | 0.00000  | -0.07360 | -0.19217 | 0.00000  |
| 68 | C5 | PX  | -0.01211 | 0.00000  | 0.12450  | 0.03808  | 0.00000  |
| 69 | C5 | PY  | 0.23405  | 0.00000  | 0.09811  | 0.08683  | 0.00000  |
| 70 | C5 | PZ  | 0.00000  | 0.00854  | 0.00000  | 0.00000  | -0.03112 |
| 71 | C5 | S   | -1.58327 | 0.00000  | 1.52175  | 1.12825  | 0.00000  |
| 72 | C5 | PX  | -0.58638 | 0.00000  | 0.18979  | 0.53560  | 0.00000  |
| 73 | C5 | PY  | 0.04998  | 0.00000  | -0.36855 | -0.35242 | 0.00000  |
| 74 | C5 | PZ  | 0.00000  | 0.01903  | 0.00000  | 0.00000  | -0.07280 |
| 75 | C5 | DXX | -0.08394 | 0.00000  | 0.02371  | 0.06377  | 0.00000  |
| 76 | C5 | DYY | 0.28009  | 0.00000  | -0.05171 | 0.06139  | 0.00000  |
| 77 | C5 | DZZ | -0.36440 | 0.00000  | 0.07954  | -0.16078 | 0.00000  |
| 78 | C5 | DXY | -0.03784 | 0.00000  | -0.14043 | 0.06170  | 0.00000  |
| 79 | C5 | DXZ | 0.00000  | -0.00439 | 0.00000  | 0.00000  | -0.02507 |
| 80 | C5 | DYZ | 0.00000  | -0.03198 | 0.00000  | 0.00000  | 0.04386  |
| 81 | C6 | S   | 0.01376  | 0.00000  | 0.01108  | -0.01328 | 0.00000  |
| 82 | C6 | S   | 0.41536  | 0.00000  | -0.13070 | -0.07756 | 0.00000  |
| 83 | C6 | PX  | 0.05031  | 0.00000  | -0.05637 | -0.03339 | 0.00000  |
| 84 | C6 | PY  | 0.17692  | 0.00000  | -0.07515 | 0.02689  | 0.00000  |
| 85 | C6 | PZ  | 0.00000  | 0.00264  | 0.00000  | 0.00000  | 0.01269  |
| 86 | C6 | S   | -0.78433 | 0.00000  | 0.72518  | 0.10033  | 0.00000  |
| 87 | C6 | PX  | -1.39364 | 0.00000  | 0.28489  | 0.33720  | 0.00000  |
| 88 | C6 | PY  | -1.86918 | 0.00000  | 0.51621  | -1.00103 | 0.00000  |
| 89 | C6 | PZ  | 0.00000  | -0.03131 | 0.00000  | 0.00000  | -0.03428 |
| 90 | C6 | DXX | 0.10175  | 0.00000  | 0.17521  | -0.00282 | 0.00000  |
| 91 | C6 | DYY | -0.17204 | 0.00000  | -0.23954 | 0.12020  | 0.00000  |
| 92 | C6 | DZZ | 0.00051  | 0.00000  | 0.09373  | -0.16980 | 0.00000  |
| 93 | C6 | DXY | -0.03739 | 0.00000  | -0.07084 | 0.00894  | 0.00000  |

|     |    |     |          |          |          |          |          |
|-----|----|-----|----------|----------|----------|----------|----------|
| 94  | C6 | DXZ | 0.00000  | -0.05410 | 0.00000  | 0.00000  | 0.05298  |
| 95  | C6 | DYZ | 0.00000  | -0.00372 | 0.00000  | 0.00000  | 0.00665  |
| 96  | C7 | S   | 0.03211  | 0.00000  | 0.01722  | -0.01054 | 0.00000  |
| 97  | C7 | S   | 0.58603  | 0.00000  | 0.35061  | -0.13599 | 0.00000  |
| 98  | C7 | PX  | -0.14056 | 0.00000  | -0.16288 | 0.02449  | 0.00000  |
| 99  | C7 | PY  | 0.07779  | 0.00000  | 0.14505  | -0.04390 | 0.00000  |
| 100 | C7 | PZ  | 0.00000  | 0.00449  | 0.00000  | 0.00000  | -0.00018 |
| 101 | C7 | S   | -3.84203 | 0.00000  | -0.47942 | 1.28469  | 0.00000  |
| 102 | C7 | PX  | 2.58942  | 0.00000  | 0.57121  | -0.73433 | 0.00000  |
| 103 | C7 | PY  | -0.23949 | 0.00000  | -0.65146 | 0.61989  | 0.00000  |
| 104 | C7 | PZ  | 0.00000  | -0.01658 | 0.00000  | 0.00000  | -0.02140 |
| 105 | C7 | DXX | -0.14162 | 0.00000  | 0.00572  | -0.06494 | 0.00000  |
| 106 | C7 | DYY | 0.00688  | 0.00000  | -0.15349 | 0.10456  | 0.00000  |
| 107 | C7 | DZZ | 0.11406  | 0.00000  | 0.23478  | -0.02854 | 0.00000  |
| 108 | C7 | DXY | -0.04677 | 0.00000  | 0.22207  | -0.16586 | 0.00000  |
| 109 | C7 | DXZ | 0.00000  | -0.00116 | 0.00000  | 0.00000  | 0.01274  |
| 110 | C7 | DYZ | 0.00000  | -0.05984 | 0.00000  | 0.00000  | -0.00684 |
| 111 | O1 | S   | -0.00280 | 0.00000  | -0.00275 | -0.01397 | 0.00000  |
| 112 | O1 | S   | -0.25887 | 0.00000  | 0.07557  | 0.61348  | 0.00000  |
| 113 | O1 | PX  | -0.11076 | 0.00000  | 0.31045  | 0.37728  | 0.00000  |
| 114 | O1 | PY  | 0.04654  | 0.00000  | 0.31528  | 0.03086  | 0.00000  |
| 115 | O1 | PZ  | 0.00000  | 0.00693  | 0.00000  | 0.00000  | 0.05642  |
| 116 | O1 | S   | 0.50485  | 0.00000  | -0.05018 | -1.11766 | 0.00000  |
| 117 | O1 | PX  | 0.23377  | 0.00000  | -0.64166 | -0.57186 | 0.00000  |
| 118 | O1 | PY  | -0.01879 | 0.00000  | -0.41989 | 0.18136  | 0.00000  |
| 119 | O1 | PZ  | 0.00000  | -0.02636 | 0.00000  | 0.00000  | -0.11273 |
| 120 | O1 | DXX | -0.02395 | 0.00000  | -0.09414 | -0.10911 | 0.00000  |
| 121 | O1 | DYY | -0.01851 | 0.00000  | 0.03699  | 0.14464  | 0.00000  |
| 122 | O1 | DZZ | -0.11244 | 0.00000  | 0.06020  | 0.15705  | 0.00000  |
| 123 | O1 | DXY | -0.01187 | 0.00000  | -0.06784 | 0.01876  | 0.00000  |
| 124 | O1 | DXZ | 0.00000  | -0.04139 | 0.00000  | 0.00000  | 0.06200  |
| 125 | O1 | DYZ | 0.00000  | 0.02594  | 0.00000  | 0.00000  | -0.03097 |
| 126 | H4 | S   | -0.10196 | 0.00000  | -0.08177 | 0.04808  | 0.00000  |
| 127 | H4 | S   | 0.01557  | 0.00000  | 0.06534  | 0.11186  | 0.00000  |
| 128 | H4 | PX  | 0.16823  | 0.00000  | 0.02467  | 0.04986  | 0.00000  |
| 129 | H4 | PY  | 0.05708  | 0.00000  | -0.02999 | 0.04640  | 0.00000  |
| 130 | H4 | PZ  | 0.00000  | -0.03128 | 0.00000  | 0.00000  | 0.10371  |
| 131 | N1 | S   | 0.02177  | 0.00000  | 0.00190  | 0.00132  | 0.00000  |
| 132 | N1 | S   | 0.57437  | 0.00000  | 0.31053  | -0.13652 | 0.00000  |
| 133 | N1 | PX  | 0.04172  | 0.00000  | 0.05169  | -0.04223 | 0.00000  |
| 134 | N1 | PY  | 0.23104  | 0.00000  | 0.13955  | -0.05326 | 0.00000  |
| 135 | N1 | PZ  | 0.00000  | -0.00840 | 0.00000  | 0.00000  | 0.00075  |
| 136 | N1 | S   | -2.38375 | 0.00000  | -0.58595 | 0.04343  | 0.00000  |
| 137 | N1 | PX  | -0.16259 | 0.00000  | -0.25211 | 0.25308  | 0.00000  |
| 138 | N1 | PY  | -1.14137 | 0.00000  | -0.06237 | -0.23542 | 0.00000  |
| 139 | N1 | PZ  | 0.00000  | 0.02270  | 0.00000  | 0.00000  | 0.01872  |
| 140 | N1 | DXX | 0.03242  | 0.00000  | 0.07568  | -0.03698 | 0.00000  |
| 141 | N1 | DYY | 0.02155  | 0.00000  | -0.05044 | 0.00425  | 0.00000  |
| 142 | N1 | DZZ | 0.07143  | 0.00000  | 0.07749  | -0.01058 | 0.00000  |
| 143 | N1 | DXY | 0.04264  | 0.00000  | 0.05747  | -0.01108 | 0.00000  |
| 144 | N1 | DXZ | 0.00000  | 0.02908  | 0.00000  | 0.00000  | 0.01375  |
| 145 | N1 | DYZ | 0.00000  | -0.00266 | 0.00000  | 0.00000  | -0.01187 |
| 146 | H6 | S   | 0.23511  | 0.00000  | 0.07771  | -0.07137 | 0.00000  |
| 147 | H6 | S   | 0.44772  | 0.00000  | -0.21672 | 0.11513  | 0.00000  |



|     |     |     |          |          |          |          |          |
|-----|-----|-----|----------|----------|----------|----------|----------|
| 148 | H6  | PX  | 0.03705  | 0.00000  | -0.07329 | 0.05674  | 0.00000  |
| 149 | H6  | PY  | -0.16931 | 0.00000  | 0.05666  | -0.06508 | 0.00000  |
| 150 | H6  | PZ  | 0.00000  | 0.02330  | 0.00000  | 0.00000  | -0.04036 |
| 151 | C8  | S   | 0.00749  | 0.00000  | 0.00287  | 0.01109  | 0.00000  |
| 152 | C8  | S   | 0.20854  | 0.00000  | -0.00947 | 0.19701  | 0.00000  |
| 153 | C8  | PX  | 0.07629  | 0.00000  | -0.01863 | 0.00852  | 0.00000  |
| 154 | C8  | PY  | -0.12343 | 0.00000  | -0.14076 | 0.12295  | 0.00000  |
| 155 | C8  | PZ  | 0.00000  | -0.00986 | 0.00000  | 0.00000  | -0.00103 |
| 156 | C8  | S   | 1.57230  | 0.00000  | 0.14324  | -0.34317 | 0.00000  |
| 157 | C8  | PX  | 0.29353  | 0.00000  | -0.40376 | 0.39495  | 0.00000  |
| 158 | C8  | PY  | 1.55837  | 0.00000  | 0.96670  | -1.49622 | 0.00000  |
| 159 | C8  | PZ  | 0.00000  | -0.03771 | 0.00000  | 0.00000  | -0.01102 |
| 160 | C8  | DXX | -0.00515 | 0.00000  | -0.13286 | 0.07324  | 0.00000  |
| 161 | C8  | DYY | -0.17474 | 0.00000  | 0.01752  | -0.07051 | 0.00000  |
| 162 | C8  | DZZ | 0.34784  | 0.00000  | 0.12141  | 0.04991  | 0.00000  |
| 163 | C8  | DXY | 0.08431  | 0.00000  | -0.02021 | 0.00094  | 0.00000  |
| 164 | C8  | DXZ | 0.00000  | -0.01874 | 0.00000  | 0.00000  | 0.03440  |
| 165 | C8  | DYZ | 0.00000  | 0.00865  | 0.00000  | 0.00000  | 0.00798  |
| 166 | H8  | S   | -0.07470 | 0.00000  | -0.02469 | 0.07404  | 0.00000  |
| 167 | H8  | S   | -0.71213 | 0.00000  | -0.22346 | 0.17377  | 0.00000  |
| 168 | H8  | PX  | -0.01515 | 0.00000  | 0.03116  | 0.01929  | 0.00000  |
| 169 | H8  | PY  | -0.05780 | 0.00000  | 0.13554  | -0.12114 | 0.00000  |
| 170 | H8  | PZ  | 0.00000  | -0.00509 | 0.00000  | 0.00000  | -0.00941 |
| 171 | C10 | S   | 0.01982  | 0.00000  | -0.00678 | 0.01684  | 0.00000  |
| 172 | C10 | S   | 0.19679  | 0.00000  | -0.04410 | 0.09109  | 0.00000  |
| 173 | C10 | PX  | -0.05462 | 0.00000  | 0.06253  | -0.06789 | 0.00000  |
| 174 | C10 | PY  | 0.11728  | 0.00000  | 0.03369  | -0.03206 | 0.00000  |
| 175 | C10 | PZ  | 0.00000  | 0.00361  | 0.00000  | 0.00000  | -0.00006 |
| 176 | C10 | S   | 0.29022  | 0.00000  | 0.81678  | -1.26180 | 0.00000  |
| 177 | C10 | PX  | 0.05485  | 0.00000  | -0.33654 | 0.47886  | 0.00000  |
| 178 | C10 | PY  | -0.30405 | 0.00000  | 0.00116  | -0.26769 | 0.00000  |
| 179 | C10 | PZ  | 0.00000  | 0.02729  | 0.00000  | 0.00000  | 0.00704  |
| 180 | C10 | DXX | 0.20362  | 0.00000  | 0.07762  | -0.04016 | 0.00000  |
| 181 | C10 | DYY | -0.31723 | 0.00000  | 0.01916  | -0.10843 | 0.00000  |
| 182 | C10 | DZZ | 0.17917  | 0.00000  | -0.16779 | 0.24602  | 0.00000  |
| 183 | C10 | DXY | -0.01297 | 0.00000  | 0.15023  | -0.11245 | 0.00000  |
| 184 | C10 | DXZ | 0.00000  | -0.00672 | 0.00000  | 0.00000  | 0.00075  |
| 185 | C10 | DYZ | 0.00000  | 0.03352  | 0.00000  | 0.00000  | 0.00695  |
| 186 | H16 | S   | -0.13365 | 0.00000  | 0.02344  | -0.03386 | 0.00000  |
| 187 | H16 | S   | -0.03408 | 0.00000  | 0.04732  | -0.09885 | 0.00000  |
| 188 | H16 | PX  | -0.05297 | 0.00000  | 0.07387  | -0.06578 | 0.00000  |
| 189 | H16 | PY  | 0.08918  | 0.00000  | 0.23994  | -0.19189 | 0.00000  |
| 190 | H16 | PZ  | 0.00000  | -0.01132 | 0.00000  | 0.00000  | -0.00967 |
| 191 | H18 | S   | 0.03789  | 0.00000  | -0.22880 | 0.24160  | 0.00000  |
| 192 | H18 | S   | -0.08537 | 0.00000  | -0.14806 | 0.14982  | 0.00000  |
| 193 | H18 | PX  | -0.17326 | 0.00000  | 0.12941  | -0.15888 | 0.00000  |
| 194 | H18 | PY  | 0.17039  | 0.00000  | 0.01860  | 0.03098  | 0.00000  |
| 195 | H18 | PZ  | 0.00000  | -0.02147 | 0.00000  | 0.00000  | 0.00436  |
| 196 | C9  | S   | -0.00134 | 0.00000  | 0.00848  | 0.00199  | 0.00000  |
| 197 | C9  | S   | -0.02778 | 0.00000  | 0.20376  | 0.15817  | 0.00000  |
| 198 | C9  | PX  | 0.05071  | 0.00000  | -0.18831 | -0.18337 | 0.00000  |
| 199 | C9  | PY  | 0.03998  | 0.00000  | -0.09415 | -0.09963 | 0.00000  |
| 200 | C9  | PZ  | 0.00000  | 0.01380  | 0.00000  | 0.00000  | -0.11625 |
| 201 | C9  | S   | -0.16944 | 0.00000  | 0.15926  | 0.20921  | 0.00000  |

|     |    |     |          |          |          |          |          |
|-----|----|-----|----------|----------|----------|----------|----------|
| 202 | C9 | PX  | -0.01050 | 0.00000  | 0.12820  | 0.36969  | 0.00000  |
| 203 | C9 | PY  | -0.15471 | 0.00000  | 0.27924  | 0.17886  | 0.00000  |
| 204 | C9 | PZ  | 0.00000  | -0.04469 | 0.00000  | 0.00000  | 0.61065  |
| 205 | C9 | DXX | 0.06164  | 0.00000  | -0.12340 | -0.31077 | 0.00000  |
| 206 | C9 | DYY | -0.02682 | 0.00000  | -0.05852 | -0.02135 | 0.00000  |
| 207 | C9 | DZZ | -0.03265 | 0.00000  | 0.17717  | 0.28026  | 0.00000  |
| 208 | C9 | DXY | 0.09132  | 0.00000  | -0.28075 | -0.37895 | 0.00000  |
| 209 | C9 | DXZ | 0.00000  | -0.05582 | 0.00000  | 0.00000  | 0.51986  |
| 210 | C9 | DYZ | 0.00000  | 0.01657  | 0.00000  | 0.00000  | -0.29111 |
| 211 | H3 | S   | 0.08501  | 0.00000  | -0.07361 | -0.09880 | 0.00000  |
| 212 | H3 | S   | 0.07049  | 0.00000  | -0.11819 | -0.05713 | 0.00000  |
| 213 | H3 | PX  | 0.02271  | 0.00000  | -0.16083 | -0.05122 | 0.00000  |
| 214 | H3 | PY  | 0.03922  | 0.00000  | -0.03629 | -0.07011 | 0.00000  |
| 215 | H3 | PZ  | 0.00000  | 0.59478  | 0.00000  | 0.00000  | -0.22409 |
| 216 | H5 | S   | 0.03086  | -0.03442 | -0.11672 | -0.20813 | 0.46738  |
| 217 | H5 | S   | 0.01625  | -0.00744 | 0.02332  | 0.00008  | -0.02118 |
| 218 | H5 | PX  | 0.04155  | -0.21764 | -0.11720 | -0.22788 | -0.14042 |
| 219 | H5 | PY  | 0.04497  | 0.45744  | 0.01645  | -0.10570 | -0.06778 |
| 220 | H5 | PZ  | -0.00746 | -0.25048 | 0.02935  | 0.02715  | -0.39593 |
| 221 | H7 | S   | 0.03086  | 0.03442  | -0.11672 | -0.20813 | -0.46738 |
| 222 | H7 | S   | 0.01625  | 0.00744  | 0.02332  | 0.00008  | 0.02118  |
| 223 | H7 | PX  | 0.04155  | 0.21764  | -0.11720 | -0.22788 | 0.14042  |
| 224 | H7 | PY  | 0.04497  | -0.45744 | 0.01645  | -0.10570 | 0.06778  |
| 225 | H7 | PZ  | 0.00746  | -0.25048 | -0.02935 | -0.02715 | -0.39593 |

|              |          |          |          |          |          |
|--------------|----------|----------|----------|----------|----------|
| M0:          | 156      | 157      | 158      | 159      | 160      |
| Eigenvalues: | 2.38941  | 2.40058  | 2.43816  | 2.44064  | 2.45653  |
| (ev):        | 65.01916 | 65.32302 | 66.34566 | 66.41335 | 66.84554 |

|    |    |     |          |          |          |          |          |
|----|----|-----|----------|----------|----------|----------|----------|
|    |    | A   | A        | A        | A        | A        |          |
| 1  | H1 | S   | 0.09481  | 0.00035  | 0.03272  | 0.00000  | -0.05830 |
| 2  | H1 | S   | -0.21783 | 0.21816  | 0.14406  | 0.00000  | 0.06162  |
| 3  | H1 | PX  | 0.03142  | -0.04213 | 0.02906  | 0.00000  | 0.01828  |
| 4  | H1 | PY  | 0.07018  | 0.17535  | 0.01756  | 0.00000  | -0.12263 |
| 5  | H1 | PZ  | 0.00000  | 0.00000  | 0.00000  | -0.12102 | 0.00000  |
| 6  | C1 | S   | 0.01703  | 0.00844  | -0.00909 | 0.00000  | 0.00637  |
| 7  | C1 | S   | 0.30134  | -0.04085 | -0.03642 | 0.00000  | 0.06574  |
| 8  | C1 | PX  | -0.12504 | -0.06456 | 0.00589  | 0.00000  | 0.03995  |
| 9  | C1 | PY  | 0.07102  | 0.24832  | -0.05105 | 0.00000  | -0.20223 |
| 10 | C1 | PZ  | 0.00000  | 0.00000  | 0.00000  | -0.01161 | 0.00000  |
| 11 | C1 | S   | -1.07822 | 0.18418  | 1.12917  | 0.00000  | -1.91109 |
| 12 | C1 | PX  | 0.78632  | -0.35856 | -0.52643 | 0.00000  | 0.42978  |
| 13 | C1 | PY  | -0.38170 | -0.04304 | 0.18597  | 0.00000  | 0.86380  |
| 14 | C1 | PZ  | 0.00000  | 0.00000  | 0.00000  | 0.02794  | 0.00000  |
| 15 | C1 | DXX | -0.12035 | -0.08534 | 0.01065  | 0.00000  | -0.00714 |
| 16 | C1 | DYY | 0.02037  | 0.03658  | -0.07054 | 0.00000  | 0.06577  |
| 17 | C1 | DZZ | 0.16973  | 0.09508  | 0.09385  | 0.00000  | -0.08838 |
| 18 | C1 | DXY | -0.05393 | 0.12860  | -0.06723 | 0.00000  | 0.05869  |
| 19 | C1 | DXZ | 0.00000  | 0.00000  | 0.00000  | 0.02139  | 0.00000  |
| 20 | C1 | DYZ | 0.00000  | 0.00000  | 0.00000  | 0.04625  | 0.00000  |
| 21 | C2 | S   | 0.01124  | -0.00003 | -0.01181 | 0.00000  | 0.00884  |
| 22 | C2 | S   | 0.25078  | -0.13698 | 0.07408  | 0.00000  | 0.18390  |
| 23 | C2 | PX  | 0.03707  | -0.11679 | 0.09122  | 0.00000  | 0.04939  |
| 24 | C2 | PY  | 0.26840  | 0.09188  | -0.00196 | 0.00000  | -0.04293 |

|    |    |     |          |          |          |          |          |
|----|----|-----|----------|----------|----------|----------|----------|
| 25 | C2 | PZ  | 0.00000  | 0.00000  | 0.00000  | 0.02795  | 0.00000  |
| 26 | C2 | S   | -0.51880 | -0.45052 | 0.92115  | 0.00000  | -0.63745 |
| 27 | C2 | PX  | -0.31468 | -0.09825 | 0.40083  | 0.00000  | -0.53552 |
| 28 | C2 | PY  | -0.20981 | -1.54381 | -0.14041 | 0.00000  | 0.78883  |
| 29 | C2 | PZ  | 0.00000  | 0.00000  | 0.00000  | -0.01259 | 0.00000  |
| 30 | C2 | DXX | 0.00972  | 0.04790  | 0.04982  | 0.00000  | -0.13510 |
| 31 | C2 | DYY | -0.04485 | 0.05928  | 0.00024  | 0.00000  | 0.06050  |
| 32 | C2 | DZZ | 0.13670  | -0.16247 | -0.01741 | 0.00000  | 0.09339  |
| 33 | C2 | DXY | -0.04392 | -0.13052 | -0.05580 | 0.00000  | 0.01988  |
| 34 | C2 | DXZ | 0.00000  | 0.00000  | 0.00000  | 0.04027  | 0.00000  |
| 35 | C2 | DYZ | 0.00000  | 0.00000  | 0.00000  | -0.00185 | 0.00000  |
| 36 | C3 | S   | 0.00469  | 0.01227  | -0.02384 | 0.00000  | 0.00589  |
| 37 | C3 | S   | -0.31355 | 0.06327  | -0.28354 | 0.00000  | 0.05112  |
| 38 | C3 | PX  | 0.15094  | -0.00962 | 0.15879  | 0.00000  | -0.09793 |
| 39 | C3 | PY  | 0.07245  | -0.06839 | 0.22257  | 0.00000  | -0.13512 |
| 40 | C3 | PZ  | 0.00000  | 0.00000  | 0.00000  | -0.00282 | 0.00000  |
| 41 | C3 | S   | 0.95837  | -2.99933 | -0.21182 | 0.00000  | 2.21198  |
| 42 | C3 | PX  | -0.94251 | 0.68442  | -0.60440 | 0.00000  | 0.66195  |
| 43 | C3 | PY  | -0.19998 | 1.84762  | -0.58018 | 0.00000  | 0.27333  |
| 44 | C3 | PZ  | 0.00000  | 0.00000  | 0.00000  | 0.01599  | 0.00000  |
| 45 | C3 | DXX | 0.08050  | -0.01149 | 0.30751  | 0.00000  | -0.16703 |
| 46 | C3 | DYY | -0.08331 | 0.11692  | -0.04917 | 0.00000  | -0.02044 |
| 47 | C3 | DZZ | 0.02568  | -0.17433 | -0.31782 | 0.00000  | 0.24972  |
| 48 | C3 | DXY | 0.12307  | 0.20306  | -0.02590 | 0.00000  | -0.08869 |
| 49 | C3 | DXZ | 0.00000  | 0.00000  | 0.00000  | 0.56676  | 0.00000  |
| 50 | C3 | DYZ | 0.00000  | 0.00000  | 0.00000  | -0.06921 | 0.00000  |
| 51 | C4 | S   | 0.01073  | 0.01651  | 0.00359  | 0.00000  | -0.00904 |
| 52 | C4 | S   | 0.04282  | 0.38718  | 0.02154  | 0.00000  | -0.30255 |
| 53 | C4 | PX  | -0.03009 | -0.03557 | 0.02929  | 0.00000  | 0.06647  |
| 54 | C4 | PY  | 0.02638  | -0.19413 | -0.02905 | 0.00000  | 0.00897  |
| 55 | C4 | PZ  | 0.00000  | 0.00000  | 0.00000  | -0.01891 | 0.00000  |
| 56 | C4 | S   | 0.43702  | -0.48616 | -0.96809 | 0.00000  | -0.47297 |
| 57 | C4 | PX  | 0.73147  | -0.32308 | -0.25251 | 0.00000  | 1.05813  |
| 58 | C4 | PY  | -0.38874 | 1.31697  | 0.44540  | 0.00000  | -1.25858 |
| 59 | C4 | PZ  | 0.00000  | 0.00000  | 0.00000  | -0.04623 | 0.00000  |
| 60 | C4 | DXX | -0.15388 | -0.23940 | -0.05959 | 0.00000  | 0.10054  |
| 61 | C4 | DYY | 0.05285  | 0.02121  | 0.02958  | 0.00000  | -0.01132 |
| 62 | C4 | DZZ | 0.13869  | 0.27398  | -0.03968 | 0.00000  | -0.11344 |
| 63 | C4 | DXY | 0.11820  | 0.04142  | 0.04804  | 0.00000  | -0.00040 |
| 64 | C4 | DXZ | 0.00000  | 0.00000  | 0.00000  | 0.12491  | 0.00000  |
| 65 | C4 | DYZ | 0.00000  | 0.00000  | 0.00000  | -0.00526 | 0.00000  |
| 66 | C5 | S   | 0.00694  | -0.00139 | -0.00323 | 0.00000  | -0.01552 |
| 67 | C5 | S   | 0.03623  | 0.10513  | -0.03346 | 0.00000  | -0.26459 |
| 68 | C5 | PX  | 0.05433  | 0.15906  | 0.02858  | 0.00000  | -0.04707 |
| 69 | C5 | PY  | -0.02001 | 0.03416  | 0.02957  | 0.00000  | 0.05579  |
| 70 | C5 | PZ  | 0.00000  | 0.00000  | 0.00000  | 0.00971  | 0.00000  |
| 71 | C5 | S   | 0.51715  | 1.20447  | 0.02791  | 0.00000  | 0.63062  |
| 72 | C5 | PX  | 0.10495  | -0.51296 | 0.17583  | 0.00000  | 0.77376  |
| 73 | C5 | PY  | 0.54187  | -1.09203 | 0.05318  | 0.00000  | 0.52582  |
| 74 | C5 | PZ  | 0.00000  | 0.00000  | 0.00000  | 0.02322  | 0.00000  |
| 75 | C5 | DXX | 0.13572  | -0.13196 | 0.13649  | 0.00000  | 0.15350  |
| 76 | C5 | DYY | -0.20124 | 0.06554  | -0.12554 | 0.00000  | 0.01395  |
| 77 | C5 | DZZ | 0.09595  | 0.10259  | -0.00161 | 0.00000  | -0.19114 |
| 78 | C5 | DXY | -0.22809 | -0.10089 | -0.02768 | 0.00000  | 0.05689  |

|     |    |     |          |          |          |          |          |
|-----|----|-----|----------|----------|----------|----------|----------|
| 79  | C5 | DXZ | 0.00000  | 0.00000  | 0.00000  | 0.11741  | 0.00000  |
| 80  | C5 | DYZ | 0.00000  | 0.00000  | 0.00000  | 0.08793  | 0.00000  |
| 81  | C6 | S   | 0.00840  | -0.00969 | -0.01959 | 0.00000  | 0.01848  |
| 82  | C6 | S   | 0.00439  | -0.44862 | -0.31780 | 0.00000  | 0.38608  |
| 83  | C6 | PX  | -0.05334 | -0.10559 | -0.16456 | 0.00000  | 0.18398  |
| 84  | C6 | PY  | -0.19628 | -0.05603 | 0.00448  | 0.00000  | 0.03894  |
| 85  | C6 | PZ  | 0.00000  | 0.00000  | 0.00000  | 0.04173  | 0.00000  |
| 86  | C6 | S   | -0.53147 | 0.66740  | 0.21243  | 0.00000  | 0.45605  |
| 87  | C6 | PX  | -0.71583 | 2.08146  | 0.70291  | 0.00000  | -1.13378 |
| 88  | C6 | PY  | 0.58411  | 0.82097  | -1.37951 | 0.00000  | 0.23708  |
| 89  | C6 | PZ  | 0.00000  | 0.00000  | 0.00000  | 0.05089  | 0.00000  |
| 90  | C6 | DXX | 0.24426  | 0.22016  | 0.05107  | 0.00000  | -0.11141 |
| 91  | C6 | DYY | -0.09473 | -0.15995 | 0.14784  | 0.00000  | -0.08733 |
| 92  | C6 | DZZ | -0.10972 | -0.05686 | -0.27577 | 0.00000  | 0.23852  |
| 93  | C6 | DXY | 0.11473  | -0.23159 | 0.21286  | 0.00000  | 0.02447  |
| 94  | C6 | DXZ | 0.00000  | 0.00000  | 0.00000  | 0.36576  | 0.00000  |
| 95  | C6 | DYZ | 0.00000  | 0.00000  | 0.00000  | 0.15473  | 0.00000  |
| 96  | C7 | S   | 0.00610  | -0.01717 | -0.00752 | 0.00000  | 0.01294  |
| 97  | C7 | S   | 0.41562  | -0.32048 | -0.02983 | 0.00000  | 0.15315  |
| 98  | C7 | PX  | -0.17164 | 0.02537  | -0.06510 | 0.00000  | 0.02703  |
| 99  | C7 | PY  | -0.04680 | 0.17244  | -0.18221 | 0.00000  | 0.01877  |
| 100 | C7 | PZ  | 0.00000  | 0.00000  | 0.00000  | -0.10895 | 0.00000  |
| 101 | C7 | S   | -0.79357 | 3.14890  | 0.26718  | 0.00000  | -1.70317 |
| 102 | C7 | PX  | 0.58509  | -1.86693 | -0.07945 | 0.00000  | 0.78899  |
| 103 | C7 | PY  | 0.44057  | -0.26775 | 0.86506  | 0.00000  | -0.53780 |
| 104 | C7 | PZ  | 0.00000  | 0.00000  | 0.00000  | -0.15760 | 0.00000  |
| 105 | C7 | DXX | -0.08828 | -0.07506 | 0.20864  | 0.00000  | -0.04379 |
| 106 | C7 | DYY | 0.01291  | 0.15155  | -0.16805 | 0.00000  | -0.00171 |
| 107 | C7 | DZZ | 0.15141  | 0.04664  | -0.10574 | 0.00000  | 0.00087  |
| 108 | C7 | DXY | -0.06498 | 0.06728  | -0.14138 | 0.00000  | 0.06261  |
| 109 | C7 | DXZ | 0.00000  | 0.00000  | 0.00000  | 0.13396  | 0.00000  |
| 110 | C7 | DYZ | 0.00000  | 0.00000  | 0.00000  | -0.02608 | 0.00000  |
| 111 | O1 | S   | 0.01581  | 0.02044  | 0.00144  | 0.00000  | -0.02373 |
| 112 | O1 | S   | 0.00574  | 0.18244  | -0.05715 | 0.00000  | -0.23389 |
| 113 | O1 | PX  | -0.03249 | -0.02353 | -0.02228 | 0.00000  | 0.11374  |
| 114 | O1 | PY  | 0.02480  | 0.06506  | 0.06338  | 0.00000  | 0.06735  |
| 115 | O1 | PZ  | 0.00000  | 0.00000  | 0.00000  | 0.00051  | 0.00000  |
| 116 | O1 | S   | -0.20415 | -1.02254 | 0.05518  | 0.00000  | 1.27596  |
| 117 | O1 | PX  | -0.18928 | -0.10830 | 0.12079  | 0.00000  | -0.22246 |
| 118 | O1 | PY  | -0.09681 | -0.09129 | -0.15758 | 0.00000  | -0.56155 |
| 119 | O1 | PZ  | 0.00000  | 0.00000  | 0.00000  | 0.02209  | 0.00000  |
| 120 | O1 | DXX | -0.01223 | 0.05856  | -0.07727 | 0.00000  | -0.28883 |
| 121 | O1 | DYY | 0.00797  | 0.05614  | 0.04037  | 0.00000  | -0.04447 |
| 122 | O1 | DZZ | 0.05270  | -0.00226 | 0.02830  | 0.00000  | 0.20244  |
| 123 | O1 | DXY | 0.06629  | -0.09943 | 0.02935  | 0.00000  | 0.20730  |
| 124 | O1 | DXZ | 0.00000  | 0.00000  | 0.00000  | -0.04325 | 0.00000  |
| 125 | O1 | DYZ | 0.00000  | 0.00000  | 0.00000  | -0.02217 | 0.00000  |
| 126 | H4 | S   | -0.21082 | -0.03210 | -0.01475 | 0.00000  | -0.05076 |
| 127 | H4 | S   | -0.07995 | 0.07797  | 0.04902  | 0.00000  | 0.03320  |
| 128 | H4 | PX  | -0.02925 | 0.11790  | -0.04601 | 0.00000  | -0.00302 |
| 129 | H4 | PY  | -0.13310 | 0.10125  | -0.04838 | 0.00000  | -0.03049 |
| 130 | H4 | PZ  | 0.00000  | 0.00000  | 0.00000  | 0.00321  | 0.00000  |
| 131 | N1 | S   | -0.00232 | -0.00897 | -0.01581 | 0.00000  | 0.01611  |
| 132 | N1 | S   | -0.23318 | -0.12379 | 0.11485  | 0.00000  | 0.22752  |

|     |     |     |          |          |          |          |          |
|-----|-----|-----|----------|----------|----------|----------|----------|
| 133 | N1  | PX  | -0.13892 | -0.02734 | 0.26801  | 0.00000  | -0.05979 |
| 134 | N1  | PY  | 0.13043  | 0.14784  | -0.21365 | 0.00000  | 0.07461  |
| 135 | N1  | PZ  | 0.00000  | 0.00000  | 0.00000  | 0.01330  | 0.00000  |
| 136 | N1  | S   | 0.79491  | 1.03923  | 0.20705  | 0.00000  | -1.27918 |
| 137 | N1  | PX  | 0.55070  | -0.13288 | 0.20790  | 0.00000  | -0.28335 |
| 138 | N1  | PY  | -0.41101 | 0.55065  | -0.30540 | 0.00000  | -0.23582 |
| 139 | N1  | PZ  | 0.00000  | 0.00000  | 0.00000  | 0.17593  | 0.00000  |
| 140 | N1  | DXX | 0.10283  | 0.02177  | -0.12689 | 0.00000  | 0.03170  |
| 141 | N1  | DYY | -0.15531 | -0.02669 | 0.03618  | 0.00000  | 0.00752  |
| 142 | N1  | DZZ | 0.03192  | 0.05183  | 0.07001  | 0.00000  | -0.01532 |
| 143 | N1  | DXY | -0.02446 | -0.04618 | 0.05610  | 0.00000  | -0.02840 |
| 144 | N1  | DXZ | 0.00000  | 0.00000  | 0.00000  | 0.34232  | 0.00000  |
| 145 | N1  | DYZ | 0.00000  | 0.00000  | 0.00000  | -0.14855 | 0.00000  |
| 146 | H6  | S   | -0.01251 | -0.08009 | 0.00118  | 0.00000  | 0.08980  |
| 147 | H6  | S   | -0.08165 | -0.16292 | 0.06385  | 0.00000  | -0.09380 |
| 148 | H6  | PX  | -0.08275 | -0.00530 | -0.03979 | 0.00000  | -0.01544 |
| 149 | H6  | PY  | 0.13653  | 0.07387  | 0.05525  | 0.00000  | -0.12439 |
| 150 | H6  | PZ  | 0.00000  | 0.00000  | 0.00000  | 0.04384  | 0.00000  |
| 151 | C8  | S   | -0.00126 | 0.02281  | 0.01948  | 0.00000  | -0.02055 |
| 152 | C8  | S   | -0.09737 | 0.15477  | 0.43259  | 0.00000  | -0.28627 |
| 153 | C8  | PX  | 0.08071  | -0.01130 | -0.02367 | 0.00000  | -0.01833 |
| 154 | C8  | PY  | -0.03741 | 0.00402  | 0.03854  | 0.00000  | -0.00541 |
| 155 | C8  | PZ  | 0.00000  | 0.00000  | 0.00000  | -0.05773 | 0.00000  |
| 156 | C8  | S   | -0.06127 | -1.05960 | 0.37359  | 0.00000  | 0.22129  |
| 157 | C8  | PX  | 0.26035  | -0.53811 | 1.58983  | 0.00000  | -0.74809 |
| 158 | C8  | PY  | 0.65555  | -1.81187 | -2.19754 | 0.00000  | 2.36074  |
| 159 | C8  | PZ  | 0.00000  | 0.00000  | 0.00000  | -0.16848 | 0.00000  |
| 160 | C8  | DXX | 0.02110  | 0.17929  | -0.45050 | 0.00000  | 0.07653  |
| 161 | C8  | DYY | -0.08652 | -0.13563 | 0.20296  | 0.00000  | -0.02367 |
| 162 | C8  | DZZ | 0.05568  | 0.00483  | 0.36922  | 0.00000  | -0.15776 |
| 163 | C8  | DXY | -0.27009 | 0.11851  | 0.02839  | 0.00000  | -0.03837 |
| 164 | C8  | DXZ | 0.00000  | 0.00000  | 0.00000  | 0.51862  | 0.00000  |
| 165 | C8  | DYZ | 0.00000  | 0.00000  | 0.00000  | 0.32612  | 0.00000  |
| 166 | H8  | S   | 0.06562  | 0.16258  | -0.15635 | 0.00000  | 0.01796  |
| 167 | H8  | S   | -0.17200 | 0.36963  | 0.11113  | 0.00000  | -0.17993 |
| 168 | H8  | PX  | 0.05540  | 0.09461  | -0.12671 | 0.00000  | -0.00096 |
| 169 | H8  | PY  | 0.01905  | 0.00881  | -0.28404 | 0.00000  | 0.10418  |
| 170 | H8  | PZ  | 0.00000  | 0.00000  | 0.00000  | 0.25018  | 0.00000  |
| 171 | C10 | S   | -0.00483 | 0.02584  | 0.01184  | 0.00000  | -0.02460 |
| 172 | C10 | S   | -0.03402 | 0.20190  | -0.11931 | 0.00000  | -0.05710 |
| 173 | C10 | PX  | -0.16443 | 0.02134  | 0.06990  | 0.00000  | -0.02239 |
| 174 | C10 | PY  | -0.01160 | 0.04507  | -0.20682 | 0.00000  | 0.11929  |
| 175 | C10 | PZ  | 0.00000  | 0.00000  | 0.00000  | 0.06204  | 0.00000  |
| 176 | C10 | S   | 0.53622  | -1.37332 | -1.85123 | 0.00000  | 2.00166  |
| 177 | C10 | PX  | 0.59310  | 0.31222  | -0.34474 | 0.00000  | -0.10250 |
| 178 | C10 | PY  | 0.30379  | -0.35682 | -1.03828 | 0.00000  | 0.82085  |
| 179 | C10 | PZ  | 0.00000  | 0.00000  | 0.00000  | 0.17028  | 0.00000  |
| 180 | C10 | DXX | 0.06394  | -0.12778 | 0.16538  | 0.00000  | -0.03441 |
| 181 | C10 | DYY | -0.01754 | -0.10331 | -0.19816 | 0.00000  | 0.20142  |
| 182 | C10 | DZZ | -0.06429 | 0.39984  | -0.04878 | 0.00000  | -0.23548 |
| 183 | C10 | DXY | -0.13138 | 0.04575  | 0.02837  | 0.00000  | -0.02701 |
| 184 | C10 | DXZ | 0.00000  | 0.00000  | 0.00000  | 0.02513  | 0.00000  |
| 185 | C10 | DYZ | 0.00000  | 0.00000  | 0.00000  | 0.19542  | 0.00000  |
| 186 | H16 | S   | -0.19776 | 0.13421  | -0.00202 | 0.00000  | -0.05472 |

|     |     |     |          |          |          |          |          |
|-----|-----|-----|----------|----------|----------|----------|----------|
| 187 | H16 | S   | -0.26291 | -0.05349 | 0.19170  | 0.00000  | -0.03486 |
| 188 | H16 | PX  | -0.22292 | 0.11924  | 0.00011  | 0.00000  | -0.03497 |
| 189 | H16 | PY  | -0.39609 | 0.03015  | 0.27055  | 0.00000  | -0.07656 |
| 190 | H16 | PZ  | 0.00000  | 0.00000  | 0.00000  | -0.31455 | 0.00000  |
| 191 | H18 | S   | 0.13731  | 0.15252  | -0.07654 | 0.00000  | -0.07523 |
| 192 | H18 | S   | 0.25179  | 0.07221  | -0.24889 | 0.00000  | 0.03963  |
| 193 | H18 | PX  | -0.35134 | 0.06141  | 0.02510  | 0.00000  | 0.02869  |
| 194 | H18 | PY  | 0.30865  | -0.16142 | 0.06474  | 0.00000  | 0.00580  |
| 195 | H18 | PZ  | 0.00000  | 0.00000  | 0.00000  | -0.02630 | 0.00000  |
| 196 | C9  | S   | -0.00556 | -0.00686 | 0.00316  | 0.00000  | 0.01617  |
| 197 | C9  | S   | -0.03321 | 0.00423  | 0.05180  | 0.00000  | 0.27610  |
| 198 | C9  | PX  | -0.01877 | -0.04964 | 0.02198  | 0.00000  | 0.00677  |
| 199 | C9  | PY  | -0.01013 | -0.11695 | -0.09029 | 0.00000  | -0.23219 |
| 200 | C9  | PZ  | 0.00000  | 0.00000  | 0.00000  | 0.01334  | 0.00000  |
| 201 | C9  | S   | 0.24905  | 0.32951  | -0.11071 | 0.00000  | -0.38970 |
| 202 | C9  | PX  | -0.18020 | -0.32140 | -0.15099 | 0.00000  | -0.26864 |
| 203 | C9  | PY  | -0.07691 | 0.33238  | 0.39473  | 0.00000  | 0.91779  |
| 204 | C9  | PZ  | 0.00000  | 0.00000  | 0.00000  | -0.04535 | 0.00000  |
| 205 | C9  | DXX | 0.10333  | 0.02775  | -0.01844 | 0.00000  | -0.08176 |
| 206 | C9  | DYY | -0.00698 | 0.29677  | 0.20070  | 0.00000  | 0.31460  |
| 207 | C9  | DZZ | -0.08460 | -0.31725 | -0.18175 | 0.00000  | -0.25431 |
| 208 | C9  | DXY | 0.08435  | 0.03233  | -0.05016 | 0.00000  | -0.19068 |
| 209 | C9  | DXZ | 0.00000  | 0.00000  | 0.00000  | -0.00004 | 0.00000  |
| 210 | C9  | DYZ | 0.00000  | 0.00000  | 0.00000  | 0.01259  | 0.00000  |
| 211 | H3  | S   | -0.00202 | -0.30782 | -0.20525 | 0.00000  | -0.36237 |
| 212 | H3  | S   | -0.01799 | -0.07592 | -0.07585 | 0.00000  | -0.21861 |
| 213 | H3  | PX  | 0.08397  | 0.11738  | 0.16011  | 0.00000  | 0.36155  |
| 214 | H3  | PY  | 0.01967  | -0.15475 | -0.10128 | 0.00000  | -0.18464 |
| 215 | H3  | PZ  | 0.00000  | 0.00000  | 0.00000  | 0.02377  | 0.00000  |
| 216 | H5  | S   | 0.00834  | 0.17021  | 0.14048  | -0.00598 | 0.23379  |
| 217 | H5  | S   | 0.00232  | -0.05393 | 0.01218  | -0.02128 | 0.10750  |
| 218 | H5  | PX  | 0.02971  | 0.09292  | 0.03829  | 0.03694  | 0.03172  |
| 219 | H5  | PY  | -0.02290 | -0.10824 | -0.12001 | 0.02163  | -0.26928 |
| 220 | H5  | PZ  | -0.00645 | -0.02264 | -0.01463 | 0.02715  | -0.01456 |
| 221 | H7  | S   | 0.00834  | 0.17021  | 0.14048  | 0.00598  | 0.23379  |
| 222 | H7  | S   | 0.00232  | -0.05393 | 0.01218  | 0.02128  | 0.10750  |
| 223 | H7  | PX  | 0.02971  | 0.09292  | 0.03829  | -0.03694 | 0.03172  |
| 224 | H7  | PY  | -0.02290 | -0.10824 | -0.12001 | -0.02163 | -0.26928 |
| 225 | H7  | PZ  | 0.00645  | 0.02264  | 0.01463  | 0.02715  | 0.01456  |

|              |          |          |          |          |          |
|--------------|----------|----------|----------|----------|----------|
| M0:          | 161      | 162      | 163      | 164      | 165      |
| Eigenvalues: | 2.47655  | 2.52504  | 2.52866  | 2.55727  | 2.60320  |
| (ev):        | 67.39045 | 68.70988 | 68.80824 | 69.58695 | 70.83661 |

|   |    |    |          |         |          |         |         |
|---|----|----|----------|---------|----------|---------|---------|
|   |    | A  | A        | A       | A        | A       |         |
| 1 | H1 | S  | -0.22887 | 0.00000 | -0.04773 | 0.00000 | 0.00000 |
| 2 | H1 | S  | 0.35499  | 0.00000 | -0.13486 | 0.00000 | 0.00000 |
| 3 | H1 | PX | -0.04542 | 0.00000 | 0.06107  | 0.00000 | 0.00000 |
| 4 | H1 | PY | -0.15085 | 0.00000 | -0.07586 | 0.00000 | 0.00000 |
| 5 | H1 | PZ | 0.00000  | 0.20268 | 0.00000  | 0.08744 | 0.39747 |
| 6 | C1 | S  | -0.02280 | 0.00000 | -0.03047 | 0.00000 | 0.00000 |
| 7 | C1 | S  | -0.32963 | 0.00000 | -0.28429 | 0.00000 | 0.00000 |
| 8 | C1 | PX | 0.16686  | 0.00000 | 0.11427  | 0.00000 | 0.00000 |
| 9 | C1 | PY | -0.06254 | 0.00000 | -0.04012 | 0.00000 | 0.00000 |

|    |    |     |          |          |          |          |          |
|----|----|-----|----------|----------|----------|----------|----------|
| 10 | C1 | PZ  | 0.00000  | -0.10372 | 0.00000  | -0.01461 | -0.08272 |
| 11 | C1 | S   | 0.99711  | 0.00000  | 1.06038  | 0.00000  | 0.00000  |
| 12 | C1 | PX  | -1.08684 | 0.00000  | 0.17386  | 0.00000  | 0.00000  |
| 13 | C1 | PY  | 2.06581  | 0.00000  | -0.15947 | 0.00000  | 0.00000  |
| 14 | C1 | PZ  | 0.00000  | -0.11696 | 0.00000  | -0.05549 | -0.08933 |
| 15 | C1 | DXX | 0.33022  | 0.00000  | -0.06944 | 0.00000  | 0.00000  |
| 16 | C1 | DYY | -0.22764 | 0.00000  | 0.31237  | 0.00000  | 0.00000  |
| 17 | C1 | DZZ | -0.25733 | 0.00000  | -0.33667 | 0.00000  | 0.00000  |
| 18 | C1 | DXY | -0.18658 | 0.00000  | -0.08820 | 0.00000  | 0.00000  |
| 19 | C1 | DXZ | 0.00000  | 0.09135  | 0.00000  | 0.12032  | -0.17079 |
| 20 | C1 | DYZ | 0.00000  | -0.06880 | 0.00000  | -0.39383 | 0.17788  |
| 21 | C2 | S   | -0.00641 | 0.00000  | 0.03898  | 0.00000  | 0.00000  |
| 22 | C2 | S   | -0.21994 | 0.00000  | 0.22832  | 0.00000  | 0.00000  |
| 23 | C2 | PX  | -0.02158 | 0.00000  | -0.04471 | 0.00000  | 0.00000  |
| 24 | C2 | PY  | -0.07756 | 0.00000  | 0.20810  | 0.00000  | 0.00000  |
| 25 | C2 | PZ  | 0.00000  | 0.04920  | 0.00000  | -0.07694 | 0.02667  |
| 26 | C2 | S   | 0.96023  | 0.00000  | -0.62612 | 0.00000  | 0.00000  |
| 27 | C2 | PX  | 0.55078  | 0.00000  | -0.20068 | 0.00000  | 0.00000  |
| 28 | C2 | PY  | -0.74291 | 0.00000  | 0.98883  | 0.00000  | 0.00000  |
| 29 | C2 | PZ  | 0.00000  | 0.04217  | 0.00000  | -0.12235 | 0.08008  |
| 30 | C2 | DXX | 0.20630  | 0.00000  | -0.12578 | 0.00000  | 0.00000  |
| 31 | C2 | DYY | -0.21220 | 0.00000  | -0.25932 | 0.00000  | 0.00000  |
| 32 | C2 | DZZ | -0.04030 | 0.00000  | 0.46240  | 0.00000  | 0.00000  |
| 33 | C2 | DXY | -0.12501 | 0.00000  | 0.34527  | 0.00000  | 0.00000  |
| 34 | C2 | DXZ | 0.00000  | 0.12731  | 0.00000  | 0.11642  | -0.02792 |
| 35 | C2 | DYZ | 0.00000  | -0.18486 | 0.00000  | -0.42074 | 0.28290  |
| 36 | C3 | S   | -0.01287 | 0.00000  | -0.02466 | 0.00000  | 0.00000  |
| 37 | C3 | S   | 0.08110  | 0.00000  | -0.39194 | 0.00000  | 0.00000  |
| 38 | C3 | PX  | -0.06316 | 0.00000  | -0.03569 | 0.00000  | 0.00000  |
| 39 | C3 | PY  | 0.19895  | 0.00000  | -0.09690 | 0.00000  | 0.00000  |
| 40 | C3 | PZ  | 0.00000  | -0.04729 | 0.00000  | -0.10575 | -0.02621 |
| 41 | C3 | S   | 1.20097  | 0.00000  | 1.90953  | 0.00000  | 0.00000  |
| 42 | C3 | PX  | 1.54774  | 0.00000  | -1.68096 | 0.00000  | 0.00000  |
| 43 | C3 | PY  | 0.10095  | 0.00000  | -1.01049 | 0.00000  | 0.00000  |
| 44 | C3 | PZ  | 0.00000  | -0.13042 | 0.00000  | -0.02929 | -0.02509 |
| 45 | C3 | DXX | -0.05817 | 0.00000  | 0.04848  | 0.00000  | 0.00000  |
| 46 | C3 | DYY | 0.09784  | 0.00000  | 0.04994  | 0.00000  | 0.00000  |
| 47 | C3 | DZZ | 0.01505  | 0.00000  | -0.17585 | 0.00000  | 0.00000  |
| 48 | C3 | DXY | 0.13558  | 0.00000  | 0.02321  | 0.00000  | 0.00000  |
| 49 | C3 | DXZ | 0.00000  | 0.10660  | 0.00000  | -0.35610 | -0.06833 |
| 50 | C3 | DYZ | 0.00000  | 0.40444  | 0.00000  | -0.03035 | 0.39190  |
| 51 | C4 | S   | -0.02319 | 0.00000  | -0.02217 | 0.00000  | 0.00000  |
| 52 | C4 | S   | -0.29418 | 0.00000  | -0.04971 | 0.00000  | 0.00000  |
| 53 | C4 | PX  | -0.11435 | 0.00000  | -0.18047 | 0.00000  | 0.00000  |
| 54 | C4 | PY  | 0.09193  | 0.00000  | 0.04436  | 0.00000  | 0.00000  |
| 55 | C4 | PZ  | 0.00000  | 0.01628  | 0.00000  | 0.11641  | -0.11536 |
| 56 | C4 | S   | -0.86762 | 0.00000  | 0.37019  | 0.00000  | 0.00000  |
| 57 | C4 | PX  | -1.82595 | 0.00000  | -0.47532 | 0.00000  | 0.00000  |
| 58 | C4 | PY  | -0.44849 | 0.00000  | -0.52860 | 0.00000  | 0.00000  |
| 59 | C4 | PZ  | 0.00000  | 0.06574  | 0.00000  | 0.10584  | -0.05784 |
| 60 | C4 | DXX | -0.00620 | 0.00000  | 0.26047  | 0.00000  | 0.00000  |
| 61 | C4 | DYY | 0.13810  | 0.00000  | -0.09772 | 0.00000  | 0.00000  |
| 62 | C4 | DZZ | -0.22344 | 0.00000  | -0.17816 | 0.00000  | 0.00000  |
| 63 | C4 | DXY | -0.27319 | 0.00000  | -0.07456 | 0.00000  | 0.00000  |

|     |    |     |          |          |          |          |          |
|-----|----|-----|----------|----------|----------|----------|----------|
| 64  | C4 | DXZ | 0.00000  | 0.41164  | 0.00000  | 0.19770  | -0.03632 |
| 65  | C4 | DYZ | 0.00000  | -0.02034 | 0.00000  | 0.05777  | -0.29592 |
| 66  | C5 | S   | 0.01022  | 0.00000  | 0.02716  | 0.00000  | 0.00000  |
| 67  | C5 | S   | 0.40102  | 0.00000  | 0.13521  | 0.00000  | 0.00000  |
| 68  | C5 | PX  | -0.01983 | 0.00000  | -0.13916 | 0.00000  | 0.00000  |
| 69  | C5 | PY  | -0.19532 | 0.00000  | -0.17951 | 0.00000  | 0.00000  |
| 70  | C5 | PZ  | 0.00000  | 0.06074  | 0.00000  | 0.08918  | -0.05872 |
| 71  | C5 | S   | -1.27394 | 0.00000  | -1.35455 | 0.00000  | 0.00000  |
| 72  | C5 | PX  | -0.94238 | 0.00000  | -0.15270 | 0.00000  | 0.00000  |
| 73  | C5 | PY  | -0.03241 | 0.00000  | 0.75812  | 0.00000  | 0.00000  |
| 74  | C5 | PZ  | 0.00000  | 0.03684  | 0.00000  | 0.13801  | -0.10935 |
| 75  | C5 | DXX | -0.14688 | 0.00000  | -0.19138 | 0.00000  | 0.00000  |
| 76  | C5 | DYY | 0.08047  | 0.00000  | -0.00632 | 0.00000  | 0.00000  |
| 77  | C5 | DZZ | 0.15108  | 0.00000  | 0.17889  | 0.00000  | 0.00000  |
| 78  | C5 | DXY | 0.12432  | 0.00000  | -0.28522 | 0.00000  | 0.00000  |
| 79  | C5 | DXZ | 0.00000  | 0.16251  | 0.00000  | -0.21251 | 0.18611  |
| 80  | C5 | DYZ | 0.00000  | 0.08886  | 0.00000  | -0.29550 | 0.15539  |
| 81  | C6 | S   | -0.00333 | 0.00000  | 0.00293  | 0.00000  | 0.00000  |
| 82  | C6 | S   | 0.02922  | 0.00000  | 0.20191  | 0.00000  | 0.00000  |
| 83  | C6 | PX  | 0.07060  | 0.00000  | -0.21441 | 0.00000  | 0.00000  |
| 84  | C6 | PY  | -0.07342 | 0.00000  | 0.29605  | 0.00000  | 0.00000  |
| 85  | C6 | PZ  | 0.00000  | -0.02927 | 0.00000  | -0.12667 | 0.01039  |
| 86  | C6 | S   | 0.08527  | 0.00000  | -1.00430 | 0.00000  | 0.00000  |
| 87  | C6 | PX  | 1.05718  | 0.00000  | -2.28000 | 0.00000  | 0.00000  |
| 88  | C6 | PY  | -0.21031 | 0.00000  | -0.23906 | 0.00000  | 0.00000  |
| 89  | C6 | PZ  | 0.00000  | -0.02914 | 0.00000  | -0.13601 | -0.00668 |
| 90  | C6 | DXX | -0.10854 | 0.00000  | 0.11096  | 0.00000  | 0.00000  |
| 91  | C6 | DYY | 0.09815  | 0.00000  | -0.10595 | 0.00000  | 0.00000  |
| 92  | C6 | DZZ | -0.05656 | 0.00000  | 0.02571  | 0.00000  | 0.00000  |
| 93  | C6 | DXY | -0.06099 | 0.00000  | -0.10533 | 0.00000  | 0.00000  |
| 94  | C6 | DXZ | 0.00000  | 0.43547  | 0.00000  | 0.04373  | 0.03636  |
| 95  | C6 | DYZ | 0.00000  | 0.02910  | 0.00000  | 0.22791  | 0.13783  |
| 96  | C7 | S   | 0.00658  | 0.00000  | -0.00506 | 0.00000  | 0.00000  |
| 97  | C7 | S   | 0.20306  | 0.00000  | -0.03295 | 0.00000  | 0.00000  |
| 98  | C7 | PX  | -0.10863 | 0.00000  | 0.03251  | 0.00000  | 0.00000  |
| 99  | C7 | PY  | -0.01114 | 0.00000  | -0.02667 | 0.00000  | 0.00000  |
| 100 | C7 | PZ  | 0.00000  | 0.09233  | 0.00000  | -0.00566 | 0.05180  |
| 101 | C7 | S   | -1.32938 | 0.00000  | -0.28190 | 0.00000  | 0.00000  |
| 102 | C7 | PX  | 0.48940  | 0.00000  | 0.53680  | 0.00000  | 0.00000  |
| 103 | C7 | PY  | -0.56262 | 0.00000  | 0.48994  | 0.00000  | 0.00000  |
| 104 | C7 | PZ  | 0.00000  | 0.19321  | 0.00000  | -0.00315 | 0.07848  |
| 105 | C7 | DXX | 0.16516  | 0.00000  | -0.17988 | 0.00000  | 0.00000  |
| 106 | C7 | DYY | -0.13062 | 0.00000  | 0.20100  | 0.00000  | 0.00000  |
| 107 | C7 | DZZ | -0.04354 | 0.00000  | -0.02570 | 0.00000  | 0.00000  |
| 108 | C7 | DXY | 0.02151  | 0.00000  | -0.04346 | 0.00000  | 0.00000  |
| 109 | C7 | DXZ | 0.00000  | 0.04047  | 0.00000  | -0.03491 | 0.04313  |
| 110 | C7 | DYZ | 0.00000  | 0.18290  | 0.00000  | 0.45816  | 0.33908  |
| 111 | O1 | S   | -0.03313 | 0.00000  | -0.02528 | 0.00000  | 0.00000  |
| 112 | O1 | S   | -0.53600 | 0.00000  | -0.13079 | 0.00000  | 0.00000  |
| 113 | O1 | PX  | -0.02436 | 0.00000  | -0.01224 | 0.00000  | 0.00000  |
| 114 | O1 | PY  | 0.14068  | 0.00000  | -0.05959 | 0.00000  | 0.00000  |
| 115 | O1 | PZ  | 0.00000  | 0.02867  | 0.00000  | 0.04056  | -0.05212 |
| 116 | O1 | S   | 1.82151  | 0.00000  | 0.80921  | 0.00000  | 0.00000  |
| 117 | O1 | PX  | 0.76931  | 0.00000  | 0.49352  | 0.00000  | 0.00000  |



|     |     |     |          |          |          |          |          |
|-----|-----|-----|----------|----------|----------|----------|----------|
| 118 | O1  | PY  | -0.19577 | 0.00000  | 0.18051  | 0.00000  | 0.00000  |
| 119 | O1  | PZ  | 0.00000  | -0.04309 | 0.00000  | -0.14585 | 0.25349  |
| 120 | O1  | DXX | 0.00684  | 0.00000  | 0.05638  | 0.00000  | 0.00000  |
| 121 | O1  | DYY | -0.10844 | 0.00000  | -0.08542 | 0.00000  | 0.00000  |
| 122 | O1  | DZZ | -0.14361 | 0.00000  | -0.06108 | 0.00000  | 0.00000  |
| 123 | O1  | DXY | -0.15397 | 0.00000  | 0.02565  | 0.00000  | 0.00000  |
| 124 | O1  | DXZ | 0.00000  | -0.10827 | 0.00000  | -0.08706 | 0.11688  |
| 125 | O1  | DYZ | 0.00000  | 0.07793  | 0.00000  | 0.19753  | -0.33232 |
| 126 | H4  | S   | 0.08016  | 0.00000  | -0.13618 | 0.00000  | 0.00000  |
| 127 | H4  | S   | -0.16141 | 0.00000  | -0.06095 | 0.00000  | 0.00000  |
| 128 | H4  | PX  | -0.13418 | 0.00000  | -0.11102 | 0.00000  | 0.00000  |
| 129 | H4  | PY  | 0.01151  | 0.00000  | -0.26517 | 0.00000  | 0.00000  |
| 130 | H4  | PZ  | 0.00000  | -0.06770 | 0.00000  | -0.17834 | 0.21575  |
| 131 | N1  | S   | 0.00427  | 0.00000  | -0.01113 | 0.00000  | 0.00000  |
| 132 | N1  | S   | -0.04610 | 0.00000  | -0.08386 | 0.00000  | 0.00000  |
| 133 | N1  | PX  | -0.08174 | 0.00000  | -0.01939 | 0.00000  | 0.00000  |
| 134 | N1  | PY  | -0.00387 | 0.00000  | 0.13165  | 0.00000  | 0.00000  |
| 135 | N1  | PZ  | 0.00000  | -0.00254 | 0.00000  | 0.00770  | 0.01029  |
| 136 | N1  | S   | -0.19944 | 0.00000  | 0.50397  | 0.00000  | 0.00000  |
| 137 | N1  | PX  | -0.21413 | 0.00000  | 0.85290  | 0.00000  | 0.00000  |
| 138 | N1  | PY  | -0.07922 | 0.00000  | -0.29268 | 0.00000  | 0.00000  |
| 139 | N1  | PZ  | 0.00000  | 0.11460  | 0.00000  | 0.14221  | -0.02267 |
| 140 | N1  | DXX | -0.12618 | 0.00000  | 0.27637  | 0.00000  | 0.00000  |
| 141 | N1  | DYY | 0.03884  | 0.00000  | -0.00569 | 0.00000  | 0.00000  |
| 142 | N1  | DZZ | 0.02431  | 0.00000  | -0.21496 | 0.00000  | 0.00000  |
| 143 | N1  | DXY | -0.18239 | 0.00000  | 0.28071  | 0.00000  | 0.00000  |
| 144 | N1  | DXZ | 0.00000  | 0.11420  | 0.00000  | -0.04472 | -0.21065 |
| 145 | N1  | DYZ | 0.00000  | 0.09051  | 0.00000  | 0.37126  | 0.14771  |
| 146 | H6  | S   | -0.10261 | 0.00000  | 0.03911  | 0.00000  | 0.00000  |
| 147 | H6  | S   | 0.05667  | 0.00000  | 0.10814  | 0.00000  | 0.00000  |
| 148 | H6  | PX  | 0.01202  | 0.00000  | -0.02510 | 0.00000  | 0.00000  |
| 149 | H6  | PY  | 0.16976  | 0.00000  | 0.14562  | 0.00000  | 0.00000  |
| 150 | H6  | PZ  | 0.00000  | -0.01707 | 0.00000  | 0.22778  | -0.00391 |
| 151 | C8  | S   | 0.00588  | 0.00000  | -0.00009 | 0.00000  | 0.00000  |
| 152 | C8  | S   | 0.05876  | 0.00000  | -0.11477 | 0.00000  | 0.00000  |
| 153 | C8  | PX  | -0.03282 | 0.00000  | 0.15281  | 0.00000  | 0.00000  |
| 154 | C8  | PY  | -0.05345 | 0.00000  | -0.11493 | 0.00000  | 0.00000  |
| 155 | C8  | PZ  | 0.00000  | 0.02921  | 0.00000  | 0.03106  | 0.05251  |
| 156 | C8  | S   | 0.30157  | 0.00000  | 0.35812  | 0.00000  | 0.00000  |
| 157 | C8  | PX  | -0.08506 | 0.00000  | 0.59970  | 0.00000  | 0.00000  |
| 158 | C8  | PY  | 0.23865  | 0.00000  | -0.15360 | 0.00000  | 0.00000  |
| 159 | C8  | PZ  | 0.00000  | -0.00223 | 0.00000  | -0.01828 | -0.03460 |
| 160 | C8  | DXX | 0.12154  | 0.00000  | -0.04891 | 0.00000  | 0.00000  |
| 161 | C8  | DYY | -0.13134 | 0.00000  | 0.05296  | 0.00000  | 0.00000  |
| 162 | C8  | DZZ | 0.06544  | 0.00000  | 0.06281  | 0.00000  | 0.00000  |
| 163 | C8  | DXY | -0.11713 | 0.00000  | 0.08795  | 0.00000  | 0.00000  |
| 164 | C8  | DXZ | 0.00000  | 0.18143  | 0.00000  | 0.07784  | -0.10444 |
| 165 | C8  | DYZ | 0.00000  | -0.32286 | 0.00000  | 0.28137  | 0.30520  |
| 166 | H8  | S   | -0.12275 | 0.00000  | 0.04081  | 0.00000  | 0.00000  |
| 167 | H8  | S   | -0.01515 | 0.00000  | -0.23795 | 0.00000  | 0.00000  |
| 168 | H8  | PX  | -0.06466 | 0.00000  | 0.08123  | 0.00000  | 0.00000  |
| 169 | H8  | PY  | 0.05689  | 0.00000  | 0.00368  | 0.00000  | 0.00000  |
| 170 | H8  | PZ  | 0.00000  | -0.44615 | 0.00000  | 0.15159  | -0.17404 |
| 171 | C10 | S   | 0.01249  | 0.00000  | 0.01514  | 0.00000  | 0.00000  |

|     |     |     |          |          |          |          |          |
|-----|-----|-----|----------|----------|----------|----------|----------|
| 172 | C10 | S   | 0.12165  | 0.00000  | 0.07723  | 0.00000  | 0.00000  |
| 173 | C10 | PX  | -0.03926 | 0.00000  | -0.00499 | 0.00000  | 0.00000  |
| 174 | C10 | PY  | 0.05076  | 0.00000  | -0.05013 | 0.00000  | 0.00000  |
| 175 | C10 | PZ  | 0.00000  | -0.10159 | 0.00000  | 0.06440  | 0.10242  |
| 176 | C10 | S   | -0.12407 | 0.00000  | -0.55218 | 0.00000  | 0.00000  |
| 177 | C10 | PX  | 0.12518  | 0.00000  | -0.07906 | 0.00000  | 0.00000  |
| 178 | C10 | PY  | -0.13856 | 0.00000  | -0.28611 | 0.00000  | 0.00000  |
| 179 | C10 | PZ  | 0.00000  | -0.16313 | 0.00000  | 0.09814  | 0.14977  |
| 180 | C10 | DXX | -0.02820 | 0.00000  | 0.05733  | 0.00000  | 0.00000  |
| 181 | C10 | DYY | -0.07320 | 0.00000  | -0.17575 | 0.00000  | 0.00000  |
| 182 | C10 | DZZ | 0.15770  | 0.00000  | 0.15881  | 0.00000  | 0.00000  |
| 183 | C10 | DXY | 0.10034  | 0.00000  | -0.08802 | 0.00000  | 0.00000  |
| 184 | C10 | DXZ | 0.00000  | 0.03829  | 0.00000  | 0.02338  | 0.00453  |
| 185 | C10 | DYZ | 0.00000  | -0.10893 | 0.00000  | 0.05550  | -0.01943 |
| 186 | H16 | S   | 0.08362  | 0.00000  | -0.03273 | 0.00000  | 0.00000  |
| 187 | H16 | S   | -0.14356 | 0.00000  | 0.11290  | 0.00000  | 0.00000  |
| 188 | H16 | PX  | -0.02601 | 0.00000  | 0.03284  | 0.00000  | 0.00000  |
| 189 | H16 | PY  | -0.18871 | 0.00000  | 0.16849  | 0.00000  | 0.00000  |
| 190 | H16 | PZ  | 0.00000  | 0.24786  | 0.00000  | -0.22432 | -0.31538 |
| 191 | H18 | S   | -0.00697 | 0.00000  | 0.08941  | 0.00000  | 0.00000  |
| 192 | H18 | S   | 0.05973  | 0.00000  | -0.09598 | 0.00000  | 0.00000  |
| 193 | H18 | PX  | -0.14273 | 0.00000  | 0.02530  | 0.00000  | 0.00000  |
| 194 | H18 | PY  | 0.16272  | 0.00000  | -0.11685 | 0.00000  | 0.00000  |
| 195 | H18 | PZ  | 0.00000  | 0.31628  | 0.00000  | -0.13005 | -0.31650 |
| 196 | C9  | S   | 0.02489  | 0.00000  | 0.00610  | 0.00000  | 0.00000  |
| 197 | C9  | S   | 0.08755  | 0.00000  | -0.04681 | 0.00000  | 0.00000  |
| 198 | C9  | PX  | 0.17154  | 0.00000  | 0.15952  | 0.00000  | 0.00000  |
| 199 | C9  | PY  | -0.01904 | 0.00000  | 0.04090  | 0.00000  | 0.00000  |
| 200 | C9  | PZ  | 0.00000  | 0.00972  | 0.00000  | -0.00857 | 0.01087  |
| 201 | C9  | S   | -0.93982 | 0.00000  | -0.46616 | 0.00000  | 0.00000  |
| 202 | C9  | PX  | 0.22460  | 0.00000  | 0.24329  | 0.00000  | 0.00000  |
| 203 | C9  | PY  | 0.57957  | 0.00000  | 0.08501  | 0.00000  | 0.00000  |
| 204 | C9  | PZ  | 0.00000  | -0.04116 | 0.00000  | 0.09678  | -0.23394 |
| 205 | C9  | DXX | -0.24458 | 0.00000  | -0.20052 | 0.00000  | 0.00000  |
| 206 | C9  | DYY | 0.29528  | 0.00000  | 0.11471  | 0.00000  | 0.00000  |
| 207 | C9  | DZZ | -0.04343 | 0.00000  | 0.04259  | 0.00000  | 0.00000  |
| 208 | C9  | DXY | -0.15204 | 0.00000  | -0.10600 | 0.00000  | 0.00000  |
| 209 | C9  | DXZ | 0.00000  | 0.03697  | 0.00000  | 0.00857  | 0.05574  |
| 210 | C9  | DYZ | 0.00000  | 0.01229  | 0.00000  | -0.02264 | 0.04609  |
| 211 | H3  | S   | -0.19344 | 0.00000  | -0.04263 | 0.00000  | 0.00000  |
| 212 | H3  | S   | 0.01556  | 0.00000  | 0.08985  | 0.00000  | 0.00000  |
| 213 | H3  | PX  | -0.19985 | 0.00000  | -0.07625 | 0.00000  | 0.00000  |
| 214 | H3  | PY  | -0.16480 | 0.00000  | -0.08351 | 0.00000  | 0.00000  |
| 215 | H3  | PZ  | 0.00000  | 0.03309  | 0.00000  | -0.05598 | 0.15545  |
| 216 | H5  | S   | 0.19872  | 0.00828  | 0.02556  | 0.03507  | -0.04690 |
| 217 | H5  | S   | 0.01156  | -0.03278 | 0.02097  | 0.01084  | -0.06438 |
| 218 | H5  | PX  | 0.05879  | 0.08230  | -0.01623 | 0.00290  | 0.07258  |
| 219 | H5  | PY  | 0.06176  | 0.04914  | -0.01132 | 0.01160  | 0.00930  |
| 220 | H5  | PZ  | -0.02333 | 0.02661  | -0.01770 | -0.03492 | 0.08202  |
| 221 | H7  | S   | 0.19872  | -0.00828 | 0.02556  | -0.03507 | 0.04690  |
| 222 | H7  | S   | 0.01156  | 0.03278  | 0.02097  | -0.01084 | 0.06438  |
| 223 | H7  | PX  | 0.05879  | -0.08230 | -0.01623 | -0.00290 | -0.07258 |
| 224 | H7  | PY  | 0.06176  | -0.04914 | -0.01132 | -0.01160 | -0.00930 |
| 225 | H7  | PZ  | 0.02333  | 0.02661  | 0.01770  | -0.03492 | 0.08202  |

|              |          |          |          |          |          |
|--------------|----------|----------|----------|----------|----------|
| MO:          | 166      | 167      | 168      | 169      | 170      |
| Eigenvalues: | 2.63875  | 2.64334  | 2.68250  | 2.68802  | 2.72102  |
| (ev):        | 71.80413 | 71.92893 | 72.99470 | 73.14466 | 74.04273 |

|    |    | A   | A        | A        | A        | A        |          |
|----|----|-----|----------|----------|----------|----------|----------|
| 1  | H1 | S   | -0.14924 | 0.00000  | 0.13262  | 0.00000  | 0.08486  |
| 2  | H1 | S   | 0.17018  | 0.00000  | -0.17897 | 0.00000  | -0.03949 |
| 3  | H1 | PX  | -0.22235 | 0.00000  | 0.07119  | 0.00000  | -0.05745 |
| 4  | H1 | PY  | 0.10714  | 0.00000  | 0.09716  | 0.00000  | 0.12680  |
| 5  | H1 | PZ  | 0.00000  | 0.30492  | 0.00000  | -0.20333 | 0.00000  |
| 6  | C1 | S   | -0.05104 | 0.00000  | 0.01956  | 0.00000  | 0.01887  |
| 7  | C1 | S   | -0.32063 | 0.00000  | -0.05381 | 0.00000  | 0.26443  |
| 8  | C1 | PX  | -0.07723 | 0.00000  | 0.20744  | 0.00000  | -0.03397 |
| 9  | C1 | PY  | -0.07012 | 0.00000  | -0.05720 | 0.00000  | -0.02389 |
| 10 | C1 | PZ  | 0.00000  | -0.02799 | 0.00000  | 0.06528  | 0.00000  |
| 11 | C1 | S   | 2.23251  | 0.00000  | -0.25222 | 0.00000  | -2.07409 |
| 12 | C1 | PX  | -0.41051 | 0.00000  | 0.21248  | 0.00000  | 0.32965  |
| 13 | C1 | PY  | -1.13182 | 0.00000  | -0.11854 | 0.00000  | 0.41615  |
| 14 | C1 | PZ  | 0.00000  | -0.07293 | 0.00000  | 0.09315  | 0.00000  |
| 15 | C1 | DXX | 0.11500  | 0.00000  | -0.18753 | 0.00000  | 0.03457  |
| 16 | C1 | DYY | 0.23038  | 0.00000  | -0.03232 | 0.00000  | -0.15114 |
| 17 | C1 | DZZ | -0.48682 | 0.00000  | 0.23781  | 0.00000  | 0.08642  |
| 18 | C1 | DXY | 0.19343  | 0.00000  | -0.04993 | 0.00000  | -0.16300 |
| 19 | C1 | DXZ | 0.00000  | -0.06832 | 0.00000  | -0.08473 | 0.00000  |
| 20 | C1 | DYZ | 0.00000  | -0.22905 | 0.00000  | 0.40437  | 0.00000  |
| 21 | C2 | S   | -0.02761 | 0.00000  | -0.00403 | 0.00000  | 0.01439  |
| 22 | C2 | S   | -0.47040 | 0.00000  | -0.04239 | 0.00000  | 0.20073  |
| 23 | C2 | PX  | -0.02065 | 0.00000  | -0.01392 | 0.00000  | -0.05085 |
| 24 | C2 | PY  | -0.12064 | 0.00000  | -0.04710 | 0.00000  | -0.00999 |
| 25 | C2 | PZ  | 0.00000  | -0.08702 | 0.00000  | -0.08332 | 0.00000  |
| 26 | C2 | S   | 2.87479  | 0.00000  | -0.18298 | 0.00000  | -0.28693 |
| 27 | C2 | PX  | 1.81558  | 0.00000  | 0.22120  | 0.00000  | -0.82916 |
| 28 | C2 | PY  | 0.09791  | 0.00000  | -1.06185 | 0.00000  | 0.20218  |
| 29 | C2 | PZ  | 0.00000  | -0.03660 | 0.00000  | -0.08153 | 0.00000  |
| 30 | C2 | DXX | 0.22666  | 0.00000  | 0.02224  | 0.00000  | -0.13828 |
| 31 | C2 | DYY | -0.12347 | 0.00000  | 0.02439  | 0.00000  | 0.05089  |
| 32 | C2 | DZZ | -0.06869 | 0.00000  | -0.05921 | 0.00000  | 0.16050  |
| 33 | C2 | DXY | -0.03014 | 0.00000  | -0.19854 | 0.00000  | -0.02590 |
| 34 | C2 | DXZ | 0.00000  | 0.11545  | 0.00000  | 0.11734  | 0.00000  |
| 35 | C2 | DYZ | 0.00000  | -0.16367 | 0.00000  | 0.25426  | 0.00000  |
| 36 | C3 | S   | 0.00604  | 0.00000  | 0.01822  | 0.00000  | 0.03949  |
| 37 | C3 | S   | -0.07608 | 0.00000  | -0.01198 | 0.00000  | 0.25846  |
| 38 | C3 | PX  | 0.15784  | 0.00000  | -0.06463 | 0.00000  | 0.03302  |
| 39 | C3 | PY  | -0.26264 | 0.00000  | 0.25896  | 0.00000  | 0.00405  |
| 40 | C3 | PZ  | 0.00000  | -0.01566 | 0.00000  | 0.04704  | 0.00000  |
| 41 | C3 | S   | 0.76007  | 0.00000  | -1.06009 | 0.00000  | -1.36385 |
| 42 | C3 | PX  | -0.40299 | 0.00000  | -0.95095 | 0.00000  | 0.63969  |
| 43 | C3 | PY  | -2.26361 | 0.00000  | 0.65178  | 0.00000  | 1.79494  |
| 44 | C3 | PZ  | 0.00000  | 0.11125  | 0.00000  | -0.04323 | 0.00000  |
| 45 | C3 | DXX | 0.10363  | 0.00000  | -0.17813 | 0.00000  | -0.17806 |
| 46 | C3 | DYY | -0.05430 | 0.00000  | -0.02132 | 0.00000  | -0.06800 |
| 47 | C3 | DZZ | -0.00619 | 0.00000  | 0.09975  | 0.00000  | 0.33377  |
| 48 | C3 | DXY | -0.04476 | 0.00000  | 0.08159  | 0.00000  | 0.06575  |

|     |    |     |          |          |          |          |          |
|-----|----|-----|----------|----------|----------|----------|----------|
| 49  | C3 | DXZ | 0.00000  | -0.03936 | 0.00000  | -0.12205 | 0.00000  |
| 50  | C3 | DYZ | 0.00000  | -0.23928 | 0.00000  | 0.18733  | 0.00000  |
| 51  | C4 | S   | 0.00142  | 0.00000  | -0.01332 | 0.00000  | 0.02317  |
| 52  | C4 | S   | 0.03633  | 0.00000  | 0.12678  | 0.00000  | -0.04243 |
| 53  | C4 | PX  | 0.03573  | 0.00000  | 0.04412  | 0.00000  | 0.06990  |
| 54  | C4 | PY  | 0.18418  | 0.00000  | -0.11876 | 0.00000  | 0.17040  |
| 55  | C4 | PZ  | 0.00000  | -0.05000 | 0.00000  | -0.03134 | 0.00000  |
| 56  | C4 | S   | 0.64653  | 0.00000  | 0.42131  | 0.00000  | -0.47972 |
| 57  | C4 | PX  | -0.44929 | 0.00000  | 0.09368  | 0.00000  | 1.20172  |
| 58  | C4 | PY  | -0.02893 | 0.00000  | 0.28271  | 0.00000  | -0.23529 |
| 59  | C4 | PZ  | 0.00000  | -0.04868 | 0.00000  | -0.00704 | 0.00000  |
| 60  | C4 | DXX | 0.01234  | 0.00000  | 0.02515  | 0.00000  | -0.25754 |
| 61  | C4 | DYY | -0.08401 | 0.00000  | 0.10946  | 0.00000  | 0.11950  |
| 62  | C4 | DZZ | 0.11043  | 0.00000  | -0.16939 | 0.00000  | 0.14605  |
| 63  | C4 | DXY | -0.04195 | 0.00000  | -0.24880 | 0.00000  | -0.13697 |
| 64  | C4 | DXZ | 0.00000  | -0.12393 | 0.00000  | -0.35484 | 0.00000  |
| 65  | C4 | DYZ | 0.00000  | -0.53306 | 0.00000  | 0.24893  | 0.00000  |
| 66  | C5 | S   | -0.00460 | 0.00000  | -0.01163 | 0.00000  | -0.02598 |
| 67  | C5 | S   | 0.28918  | 0.00000  | -0.06498 | 0.00000  | -0.05358 |
| 68  | C5 | PX  | 0.04655  | 0.00000  | 0.03314  | 0.00000  | 0.15723  |
| 69  | C5 | PY  | -0.10567 | 0.00000  | -0.02859 | 0.00000  | -0.00918 |
| 70  | C5 | PZ  | 0.00000  | -0.01345 | 0.00000  | -0.08504 | 0.00000  |
| 71  | C5 | S   | -1.60770 | 0.00000  | 0.96497  | 0.00000  | 1.13819  |
| 72  | C5 | PX  | -0.82156 | 0.00000  | -0.25632 | 0.00000  | 0.88849  |
| 73  | C5 | PY  | 0.78574  | 0.00000  | -0.62294 | 0.00000  | 0.52199  |
| 74  | C5 | PZ  | 0.00000  | -0.03629 | 0.00000  | -0.02757 | 0.00000  |
| 75  | C5 | DXX | 0.05608  | 0.00000  | -0.06824 | 0.00000  | 0.28108  |
| 76  | C5 | DYY | 0.00490  | 0.00000  | 0.16053  | 0.00000  | -0.09308 |
| 77  | C5 | DZZ | -0.14136 | 0.00000  | -0.06919 | 0.00000  | -0.21549 |
| 78  | C5 | DXY | 0.09306  | 0.00000  | -0.10830 | 0.00000  | 0.05134  |
| 79  | C5 | DXZ | 0.00000  | -0.12295 | 0.00000  | -0.00584 | 0.00000  |
| 80  | C5 | DYZ | 0.00000  | -0.33174 | 0.00000  | -0.08729 | 0.00000  |
| 81  | C6 | S   | -0.01313 | 0.00000  | 0.04470  | 0.00000  | -0.04961 |
| 82  | C6 | S   | 0.05998  | 0.00000  | 0.33639  | 0.00000  | -0.40267 |
| 83  | C6 | PX  | -0.11010 | 0.00000  | 0.14018  | 0.00000  | 0.02945  |
| 84  | C6 | PY  | -0.00566 | 0.00000  | -0.13534 | 0.00000  | 0.22317  |
| 85  | C6 | PZ  | 0.00000  | -0.02941 | 0.00000  | -0.07389 | 0.00000  |
| 86  | C6 | S   | -1.28132 | 0.00000  | -1.04821 | 0.00000  | 1.57637  |
| 87  | C6 | PX  | 0.76188  | 0.00000  | 0.27191  | 0.00000  | 0.69872  |
| 88  | C6 | PY  | -1.99094 | 0.00000  | -0.26928 | 0.00000  | 0.63275  |
| 89  | C6 | PZ  | 0.00000  | -0.08734 | 0.00000  | -0.07413 | 0.00000  |
| 90  | C6 | DXX | -0.02752 | 0.00000  | 0.10272  | 0.00000  | 0.05399  |
| 91  | C6 | DYY | 0.16585  | 0.00000  | -0.28534 | 0.00000  | 0.13785  |
| 92  | C6 | DZZ | -0.29431 | 0.00000  | 0.22338  | 0.00000  | -0.23484 |
| 93  | C6 | DXY | 0.12397  | 0.00000  | -0.02418 | 0.00000  | 0.07684  |
| 94  | C6 | DXZ | 0.00000  | -0.10512 | 0.00000  | -0.20947 | 0.00000  |
| 95  | C6 | DYZ | 0.00000  | 0.02227  | 0.00000  | 0.39000  | 0.00000  |
| 96  | C7 | S   | 0.07218  | 0.00000  | 0.00282  | 0.00000  | 0.04096  |
| 97  | C7 | S   | 0.57880  | 0.00000  | 0.05584  | 0.00000  | 0.17731  |
| 98  | C7 | PX  | 0.08099  | 0.00000  | 0.04343  | 0.00000  | -0.04673 |
| 99  | C7 | PY  | -0.08561 | 0.00000  | 0.23815  | 0.00000  | 0.27367  |
| 100 | C7 | PZ  | 0.00000  | -0.04156 | 0.00000  | 0.04052  | 0.00000  |
| 101 | C7 | S   | -3.42213 | 0.00000  | -0.40277 | 0.00000  | -0.15602 |
| 102 | C7 | PX  | 2.12006  | 0.00000  | 0.49660  | 0.00000  | -0.25673 |

|     |    |     |          |          |          |          |          |
|-----|----|-----|----------|----------|----------|----------|----------|
| 103 | C7 | PY  | -0.06384 | 0.00000  | 1.67289  | 0.00000  | 0.76357  |
| 104 | C7 | PZ  | 0.00000  | -0.07668 | 0.00000  | 0.09778  | 0.00000  |
| 105 | C7 | DXX | -0.37362 | 0.00000  | -0.14035 | 0.00000  | 0.07530  |
| 106 | C7 | DYY | -0.13943 | 0.00000  | 0.16140  | 0.00000  | -0.32310 |
| 107 | C7 | DZZ | 0.63637  | 0.00000  | -0.03972 | 0.00000  | 0.33386  |
| 108 | C7 | DXY | 0.07297  | 0.00000  | -0.43325 | 0.00000  | -0.28744 |
| 109 | C7 | DXZ | 0.00000  | -0.04702 | 0.00000  | 0.11665  | 0.00000  |
| 110 | C7 | DYZ | 0.00000  | -0.10114 | 0.00000  | 0.18194  | 0.00000  |
| 111 | O1 | S   | 0.00396  | 0.00000  | -0.01348 | 0.00000  | 0.00579  |
| 112 | O1 | S   | 0.21801  | 0.00000  | -0.14725 | 0.00000  | 0.01844  |
| 113 | O1 | PX  | -0.05255 | 0.00000  | 0.01676  | 0.00000  | 0.00782  |
| 114 | O1 | PY  | -0.09748 | 0.00000  | 0.03256  | 0.00000  | 0.01979  |
| 115 | O1 | PZ  | 0.00000  | -0.06755 | 0.00000  | 0.01081  | 0.00000  |
| 116 | O1 | S   | -0.51523 | 0.00000  | 0.37501  | 0.00000  | 0.05813  |
| 117 | O1 | PX  | 0.12886  | 0.00000  | 0.25967  | 0.00000  | -0.11999 |
| 118 | O1 | PY  | 0.29666  | 0.00000  | 0.25591  | 0.00000  | 0.11032  |
| 119 | O1 | PZ  | 0.00000  | 0.34653  | 0.00000  | -0.13926 | 0.00000  |
| 120 | O1 | DXX | 0.05416  | 0.00000  | 0.04834  | 0.00000  | -0.09045 |
| 121 | O1 | DYY | -0.10359 | 0.00000  | -0.01593 | 0.00000  | -0.03865 |
| 122 | O1 | DZZ | 0.11162  | 0.00000  | -0.13310 | 0.00000  | 0.14483  |
| 123 | O1 | DXY | -0.06049 | 0.00000  | 0.09171  | 0.00000  | 0.06246  |
| 124 | O1 | DXZ | 0.00000  | 0.17925  | 0.00000  | -0.03752 | 0.00000  |
| 125 | O1 | DYZ | 0.00000  | -0.44969 | 0.00000  | 0.08086  | 0.00000  |
| 126 | H4 | S   | -0.06487 | 0.00000  | -0.09955 | 0.00000  | -0.06343 |
| 127 | H4 | S   | -0.29381 | 0.00000  | 0.11972  | 0.00000  | 0.01699  |
| 128 | H4 | PX  | 0.01704  | 0.00000  | 0.00199  | 0.00000  | -0.00181 |
| 129 | H4 | PY  | 0.01877  | 0.00000  | -0.04552 | 0.00000  | -0.07542 |
| 130 | H4 | PZ  | 0.00000  | 0.28218  | 0.00000  | 0.20202  | 0.00000  |
| 131 | N1 | S   | 0.00589  | 0.00000  | 0.01500  | 0.00000  | -0.03705 |
| 132 | N1 | S   | 0.13653  | 0.00000  | 0.42682  | 0.00000  | -0.73216 |
| 133 | N1 | PX  | 0.04752  | 0.00000  | 0.00079  | 0.00000  | -0.04921 |
| 134 | N1 | PY  | -0.19050 | 0.00000  | 0.19563  | 0.00000  | -0.10502 |
| 135 | N1 | PZ  | 0.00000  | -0.00703 | 0.00000  | 0.00311  | 0.00000  |
| 136 | N1 | S   | -1.05454 | 0.00000  | -0.86186 | 0.00000  | 2.10120  |
| 137 | N1 | PX  | -0.24644 | 0.00000  | -0.39964 | 0.00000  | 0.61177  |
| 138 | N1 | PY  | -0.41703 | 0.00000  | -0.55387 | 0.00000  | 0.31358  |
| 139 | N1 | PZ  | 0.00000  | 0.11633  | 0.00000  | 0.24790  | 0.00000  |
| 140 | N1 | DXX | -0.13591 | 0.00000  | -0.16483 | 0.00000  | 0.20405  |
| 141 | N1 | DYY | 0.01071  | 0.00000  | -0.04649 | 0.00000  | 0.18596  |
| 142 | N1 | DZZ | 0.07763  | 0.00000  | 0.28965  | 0.00000  | -0.47124 |
| 143 | N1 | DXY | -0.10138 | 0.00000  | -0.20238 | 0.00000  | -0.04406 |
| 144 | N1 | DXZ | 0.00000  | 0.25405  | 0.00000  | 0.32234  | 0.00000  |
| 145 | N1 | DYZ | 0.00000  | -0.00142 | 0.00000  | 0.31278  | 0.00000  |
| 146 | H6 | S   | -0.00405 | 0.00000  | 0.02674  | 0.00000  | -0.02424 |
| 147 | H6 | S   | 0.49142  | 0.00000  | -0.09020 | 0.00000  | -0.27315 |
| 148 | H6 | PX  | 0.04529  | 0.00000  | -0.11073 | 0.00000  | -0.09522 |
| 149 | H6 | PY  | 0.03635  | 0.00000  | 0.25240  | 0.00000  | -0.23252 |
| 150 | H6 | PZ  | 0.00000  | 0.23316  | 0.00000  | 0.42850  | 0.00000  |
| 151 | C8 | S   | 0.00858  | 0.00000  | -0.02703 | 0.00000  | -0.03281 |
| 152 | C8 | S   | 0.12079  | 0.00000  | -0.15774 | 0.00000  | -0.20266 |
| 153 | C8 | PX  | -0.04929 | 0.00000  | -0.01855 | 0.00000  | 0.33230  |
| 154 | C8 | PY  | 0.40261  | 0.00000  | 0.33305  | 0.00000  | -0.09032 |
| 155 | C8 | PZ  | 0.00000  | -0.05137 | 0.00000  | -0.02677 | 0.00000  |
| 156 | C8 | S   | 0.39122  | 0.00000  | 0.25739  | 0.00000  | 0.74548  |

|     |     |     |          |          |          |          |          |
|-----|-----|-----|----------|----------|----------|----------|----------|
| 157 | C8  | PX  | 0.81962  | 0.00000  | 0.56298  | 0.00000  | 1.30470  |
| 158 | C8  | PY  | 0.81077  | 0.00000  | 2.45866  | 0.00000  | -0.09003 |
| 159 | C8  | PZ  | 0.00000  | -0.00452 | 0.00000  | -0.09585 | 0.00000  |
| 160 | C8  | DXX | -0.12315 | 0.00000  | 0.12931  | 0.00000  | 0.13222  |
| 161 | C8  | DYY | -0.05151 | 0.00000  | -0.07099 | 0.00000  | 0.16934  |
| 162 | C8  | DZZ | 0.13088  | 0.00000  | -0.15431 | 0.00000  | -0.27216 |
| 163 | C8  | DXY | 0.07945  | 0.00000  | 0.19001  | 0.00000  | 0.17152  |
| 164 | C8  | DXZ | 0.00000  | 0.18136  | 0.00000  | 0.22077  | 0.00000  |
| 165 | C8  | DYZ | 0.00000  | -0.14356 | 0.00000  | -0.00165 | 0.00000  |
| 166 | H8  | S   | 0.14771  | 0.00000  | 0.03308  | 0.00000  | 0.03559  |
| 167 | H8  | S   | -0.71610 | 0.00000  | -0.14237 | 0.00000  | 0.15455  |
| 168 | H8  | PX  | 0.20623  | 0.00000  | -0.01919 | 0.00000  | -0.04950 |
| 169 | H8  | PY  | 0.03466  | 0.00000  | -0.37573 | 0.00000  | -0.12159 |
| 170 | H8  | PZ  | 0.00000  | 0.17238  | 0.00000  | -0.25378 | 0.00000  |
| 171 | C10 | S   | -0.02802 | 0.00000  | -0.04380 | 0.00000  | 0.01857  |
| 172 | C10 | S   | -0.11720 | 0.00000  | -0.15524 | 0.00000  | 0.05194  |
| 173 | C10 | PX  | -0.03146 | 0.00000  | -0.08944 | 0.00000  | -0.05822 |
| 174 | C10 | PY  | 0.11568  | 0.00000  | 0.16529  | 0.00000  | -0.15787 |
| 175 | C10 | PZ  | 0.00000  | -0.06960 | 0.00000  | -0.02820 | 0.00000  |
| 176 | C10 | S   | 0.80880  | 0.00000  | 2.20445  | 0.00000  | -0.75442 |
| 177 | C10 | PX  | -0.59340 | 0.00000  | -0.54738 | 0.00000  | -0.50763 |
| 178 | C10 | PY  | 0.39465  | 0.00000  | 1.12096  | 0.00000  | -0.39679 |
| 179 | C10 | PZ  | 0.00000  | -0.09301 | 0.00000  | -0.02490 | 0.00000  |
| 180 | C10 | DXX | 0.00529  | 0.00000  | 0.04142  | 0.00000  | 0.12211  |
| 181 | C10 | DYY | 0.27170  | 0.00000  | 0.29455  | 0.00000  | -0.25661 |
| 182 | C10 | DZZ | -0.34811 | 0.00000  | -0.40138 | 0.00000  | 0.21332  |
| 183 | C10 | DXY | -0.16105 | 0.00000  | -0.24052 | 0.00000  | -0.14825 |
| 184 | C10 | DXZ | 0.00000  | 0.02258  | 0.00000  | 0.07614  | 0.00000  |
| 185 | C10 | DYZ | 0.00000  | 0.09388  | 0.00000  | 0.12312  | 0.00000  |
| 186 | H16 | S   | -0.03304 | 0.00000  | -0.16636 | 0.00000  | 0.01308  |
| 187 | H16 | S   | 0.25606  | 0.00000  | 0.33085  | 0.00000  | 0.31130  |
| 188 | H16 | PX  | -0.09317 | 0.00000  | -0.08921 | 0.00000  | -0.00020 |
| 189 | H16 | PY  | -0.01373 | 0.00000  | 0.01663  | 0.00000  | 0.14474  |
| 190 | H16 | PZ  | 0.00000  | 0.19526  | 0.00000  | 0.02656  | 0.00000  |
| 191 | H18 | S   | -0.08098 | 0.00000  | -0.05353 | 0.00000  | 0.03902  |
| 192 | H18 | S   | -0.15393 | 0.00000  | -0.06006 | 0.00000  | -0.25063 |
| 193 | H18 | PX  | 0.10042  | 0.00000  | 0.13297  | 0.00000  | -0.04485 |
| 194 | H18 | PY  | -0.08774 | 0.00000  | -0.19724 | 0.00000  | -0.20917 |
| 195 | H18 | PZ  | 0.00000  | 0.29512  | 0.00000  | 0.25053  | 0.00000  |
| 196 | C9  | S   | -0.01290 | 0.00000  | 0.01252  | 0.00000  | 0.00826  |
| 197 | C9  | S   | -0.10022 | 0.00000  | -0.02069 | 0.00000  | 0.10009  |
| 198 | C9  | PX  | 0.00534  | 0.00000  | 0.13067  | 0.00000  | -0.00014 |
| 199 | C9  | PY  | -0.01116 | 0.00000  | 0.06253  | 0.00000  | -0.06443 |
| 200 | C9  | PZ  | 0.00000  | 0.01156  | 0.00000  | 0.00540  | 0.00000  |
| 201 | C9  | S   | 0.22477  | 0.00000  | -0.46360 | 0.00000  | -0.20327 |
| 202 | C9  | PX  | 0.02014  | 0.00000  | 0.32143  | 0.00000  | 0.06986  |
| 203 | C9  | PY  | -0.23749 | 0.00000  | -0.04788 | 0.00000  | 0.01571  |
| 204 | C9  | PZ  | 0.00000  | -0.31913 | 0.00000  | 0.20859  | 0.00000  |
| 205 | C9  | DXX | -0.06720 | 0.00000  | -0.16421 | 0.00000  | -0.07310 |
| 206 | C9  | DYY | 0.06906  | 0.00000  | 0.12307  | 0.00000  | 0.15025  |
| 207 | C9  | DZZ | -0.00813 | 0.00000  | 0.01978  | 0.00000  | -0.06202 |
| 208 | C9  | DXY | 0.07929  | 0.00000  | -0.03301 | 0.00000  | 0.06600  |
| 209 | C9  | DXZ | 0.00000  | 0.10823  | 0.00000  | -0.13639 | 0.00000  |
| 210 | C9  | DYZ | 0.00000  | 0.04881  | 0.00000  | -0.03752 | 0.00000  |

|     |    |    |          |          |          |          |          |
|-----|----|----|----------|----------|----------|----------|----------|
| 211 | H3 | S  | -0.01024 | 0.00000  | 0.00237  | 0.00000  | -0.03275 |
| 212 | H3 | S  | 0.10631  | 0.00000  | 0.15298  | 0.00000  | 0.07882  |
| 213 | H3 | PX | -0.04606 | 0.00000  | -0.19498 | 0.00000  | -0.14386 |
| 214 | H3 | PY | -0.05582 | 0.00000  | -0.06695 | 0.00000  | -0.07490 |
| 215 | H3 | PZ | 0.00000  | 0.20456  | 0.00000  | -0.12716 | 0.00000  |
| 216 | H5 | S  | -0.01327 | -0.03353 | 0.00953  | -0.01144 | 0.04356  |
| 217 | H5 | S  | -0.06640 | -0.11710 | -0.01830 | 0.11902  | -0.03369 |
| 218 | H5 | PX | 0.04654  | 0.09335  | -0.04326 | -0.12657 | 0.03215  |
| 219 | H5 | PY | 0.01741  | -0.00093 | 0.07069  | -0.03100 | 0.12317  |
| 220 | H5 | PZ | -0.00678 | 0.09797  | -0.04663 | -0.05415 | -0.05403 |
| 221 | H7 | S  | -0.01327 | 0.03353  | 0.00953  | 0.01144  | 0.04356  |
| 222 | H7 | S  | -0.06640 | 0.11710  | -0.01830 | -0.11902 | -0.03369 |
| 223 | H7 | PX | 0.04654  | -0.09335 | -0.04326 | 0.12657  | 0.03215  |
| 224 | H7 | PY | 0.01741  | 0.00093  | 0.07069  | 0.03100  | 0.12317  |
| 225 | H7 | PZ | 0.00678  | 0.09797  | 0.04663  | -0.05415 | 0.05403  |

|              |          |          |          |          |          |
|--------------|----------|----------|----------|----------|----------|
| MO:          | 171      | 172      | 173      | 174      | 175      |
| Eigenvalues: | 2.72457  | 2.73628  | 2.76280  | 2.80715  | 2.83712  |
| (ev):        | 74.13948 | 74.45804 | 75.17970 | 76.38635 | 77.20205 |

|    |    | A   | A        | A        | A        | A        |          |
|----|----|-----|----------|----------|----------|----------|----------|
| 1  | H1 | S   | 0.00000  | -0.03202 | 0.02954  | 0.00000  | -0.06280 |
| 2  | H1 | S   | 0.00000  | 0.00156  | -0.50945 | 0.00000  | 0.20956  |
| 3  | H1 | PX  | 0.00000  | 0.04783  | 0.18170  | 0.00000  | 0.10954  |
| 4  | H1 | PY  | 0.00000  | -0.15424 | 0.08144  | 0.00000  | -0.48909 |
| 5  | H1 | PZ  | 0.24424  | 0.00000  | 0.00000  | -0.18170 | 0.00000  |
| 6  | C1 | S   | 0.00000  | -0.02350 | -0.00929 | 0.00000  | -0.01151 |
| 7  | C1 | S   | 0.00000  | 0.05420  | 0.18563  | 0.00000  | -0.00423 |
| 8  | C1 | PX  | 0.00000  | -0.14773 | -0.00240 | 0.00000  | -0.19002 |
| 9  | C1 | PY  | 0.00000  | 0.13470  | 0.08873  | 0.00000  | 0.30004  |
| 10 | C1 | PZ  | 0.00212  | 0.00000  | 0.00000  | 0.03895  | 0.00000  |
| 11 | C1 | S   | 0.00000  | 0.64513  | 0.55446  | 0.00000  | 0.85161  |
| 12 | C1 | PX  | 0.00000  | -0.34011 | 0.71822  | 0.00000  | -1.32114 |
| 13 | C1 | PY  | 0.00000  | 0.53171  | 0.28769  | 0.00000  | 2.79786  |
| 14 | C1 | PZ  | -0.02864 | 0.00000  | 0.00000  | 0.05610  | 0.00000  |
| 15 | C1 | DXX | 0.00000  | 0.10425  | -0.14461 | 0.00000  | 0.33545  |
| 16 | C1 | DYY | 0.00000  | 0.09540  | 0.25361  | 0.00000  | -0.15321 |
| 17 | C1 | DZZ | 0.00000  | -0.24859 | -0.05703 | 0.00000  | -0.16911 |
| 18 | C1 | DXY | 0.00000  | -0.25706 | -0.26850 | 0.00000  | -0.39002 |
| 19 | C1 | DXZ | -0.21870 | 0.00000  | 0.00000  | 0.10843  | 0.00000  |
| 20 | C1 | DYZ | 0.10417  | 0.00000  | 0.00000  | 0.00306  | 0.00000  |
| 21 | C2 | S   | 0.00000  | 0.02475  | 0.04131  | 0.00000  | -0.01124 |
| 22 | C2 | S   | 0.00000  | 0.10944  | 0.07456  | 0.00000  | -0.04604 |
| 23 | C2 | PX  | 0.00000  | -0.10023 | -0.07243 | 0.00000  | 0.07203  |
| 24 | C2 | PY  | 0.00000  | -0.17426 | -0.08908 | 0.00000  | 0.26546  |
| 25 | C2 | PZ  | 0.03235  | 0.00000  | 0.00000  | -0.03412 | 0.00000  |
| 26 | C2 | S   | 0.00000  | -1.20562 | -1.54977 | 0.00000  | 0.70880  |
| 27 | C2 | PX  | 0.00000  | 0.23264  | 0.34094  | 0.00000  | 0.14700  |
| 28 | C2 | PY  | 0.00000  | -0.91993 | -0.41933 | 0.00000  | 1.11788  |
| 29 | C2 | PZ  | 0.06577  | 0.00000  | 0.00000  | -0.04511 | 0.00000  |
| 30 | C2 | DXX | 0.00000  | -0.07528 | -0.03956 | 0.00000  | 0.07450  |
| 31 | C2 | DYY | 0.00000  | -0.05156 | -0.24349 | 0.00000  | 0.09753  |
| 32 | C2 | DZZ | 0.00000  | 0.25390  | 0.36729  | 0.00000  | -0.15119 |
| 33 | C2 | DXY | 0.00000  | -0.29742 | -0.11310 | 0.00000  | 0.13241  |

|    |    |     |          |          |          |          |          |
|----|----|-----|----------|----------|----------|----------|----------|
| 34 | C2 | DXZ | -0.33076 | 0.00000  | 0.00000  | 0.06561  | 0.00000  |
| 35 | C2 | DYZ | -0.07171 | 0.00000  | 0.00000  | -0.30907 | 0.00000  |
| 36 | C3 | S   | 0.00000  | -0.02727 | -0.01412 | 0.00000  | -0.02697 |
| 37 | C3 | S   | 0.00000  | -0.13934 | -0.11295 | 0.00000  | -0.21103 |
| 38 | C3 | PX  | 0.00000  | -0.04052 | -0.14851 | 0.00000  | -0.06715 |
| 39 | C3 | PY  | 0.00000  | -0.10936 | 0.05140  | 0.00000  | 0.16808  |
| 40 | C3 | PZ  | -0.01167 | 0.00000  | 0.00000  | 0.05351  | 0.00000  |
| 41 | C3 | S   | 0.00000  | -0.08358 | 1.90074  | 0.00000  | 1.85916  |
| 42 | C3 | PX  | 0.00000  | -0.74275 | -0.88551 | 0.00000  | 0.62386  |
| 43 | C3 | PY  | 0.00000  | 1.32344  | -1.38554 | 0.00000  | 1.75498  |
| 44 | C3 | PZ  | 0.05074  | 0.00000  | 0.00000  | -0.05292 | 0.00000  |
| 45 | C3 | DXX | 0.00000  | 0.15657  | 0.09400  | 0.00000  | -0.13141 |
| 46 | C3 | DYY | 0.00000  | 0.00171  | -0.04847 | 0.00000  | 0.23210  |
| 47 | C3 | DZZ | 0.00000  | -0.20623 | -0.03054 | 0.00000  | -0.14773 |
| 48 | C3 | DXY | 0.00000  | -0.11912 | 0.18635  | 0.00000  | 0.15537  |
| 49 | C3 | DXZ | -0.20842 | 0.00000  | 0.00000  | -0.05943 | 0.00000  |
| 50 | C3 | DYZ | 0.07498  | 0.00000  | 0.00000  | -0.13482 | 0.00000  |
| 51 | C4 | S   | 0.00000  | 0.03290  | -0.06013 | 0.00000  | 0.03631  |
| 52 | C4 | S   | 0.00000  | 0.33217  | -0.60384 | 0.00000  | 0.08527  |
| 53 | C4 | PX  | 0.00000  | -0.08737 | -0.22642 | 0.00000  | -0.21497 |
| 54 | C4 | PY  | 0.00000  | 0.38036  | -0.03241 | 0.00000  | 0.23324  |
| 55 | C4 | PZ  | -0.03100 | 0.00000  | 0.00000  | 0.01577  | 0.00000  |
| 56 | C4 | S   | 0.00000  | -0.65901 | 2.92770  | 0.00000  | -2.49233 |
| 57 | C4 | PX  | 0.00000  | -0.50097 | -2.04873 | 0.00000  | -2.09860 |
| 58 | C4 | PY  | 0.00000  | 1.45941  | -1.31032 | 0.00000  | 0.92642  |
| 59 | C4 | PZ  | -0.01860 | 0.00000  | 0.00000  | -0.01428 | 0.00000  |
| 60 | C4 | DXX | 0.00000  | -0.20028 | 0.02468  | 0.00000  | -0.19133 |
| 61 | C4 | DYY | 0.00000  | -0.06990 | 0.21427  | 0.00000  | -0.12260 |
| 62 | C4 | DZZ | 0.00000  | 0.24094  | -0.31603 | 0.00000  | 0.24312  |
| 63 | C4 | DXY | 0.00000  | 0.03252  | 0.30431  | 0.00000  | 0.30642  |
| 64 | C4 | DXZ | -0.25491 | 0.00000  | 0.00000  | -0.11961 | 0.00000  |
| 65 | C4 | DYZ | -0.03726 | 0.00000  | 0.00000  | -0.07193 | 0.00000  |
| 66 | C5 | S   | 0.00000  | -0.04030 | 0.04521  | 0.00000  | 0.03638  |
| 67 | C5 | S   | 0.00000  | -0.21084 | 0.44754  | 0.00000  | 0.05789  |
| 68 | C5 | PX  | 0.00000  | 0.18071  | -0.12854 | 0.00000  | 0.01961  |
| 69 | C5 | PY  | 0.00000  | -0.17213 | -0.21789 | 0.00000  | 0.14492  |
| 70 | C5 | PZ  | 0.04837  | 0.00000  | 0.00000  | 0.01247  | 0.00000  |
| 71 | C5 | S   | 0.00000  | 1.66548  | -2.15379 | 0.00000  | -2.10645 |
| 72 | C5 | PX  | 0.00000  | -0.19692 | -2.37672 | 0.00000  | 0.03375  |
| 73 | C5 | PY  | 0.00000  | -1.35065 | -0.87733 | 0.00000  | 0.28860  |
| 74 | C5 | PZ  | 0.04675  | 0.00000  | 0.00000  | 0.01067  | 0.00000  |
| 75 | C5 | DXX | 0.00000  | 0.20904  | -0.33938 | 0.00000  | 0.12127  |
| 76 | C5 | DYY | 0.00000  | 0.10368  | 0.16261  | 0.00000  | -0.34335 |
| 77 | C5 | DZZ | 0.00000  | -0.39440 | 0.25975  | 0.00000  | 0.26792  |
| 78 | C5 | DXY | 0.00000  | -0.20324 | 0.01946  | 0.00000  | -0.08202 |
| 79 | C5 | DXZ | -0.34307 | 0.00000  | 0.00000  | -0.08070 | 0.00000  |
| 80 | C5 | DYZ | 0.12565  | 0.00000  | 0.00000  | -0.34428 | 0.00000  |
| 81 | C6 | S   | 0.00000  | 0.02008  | -0.00420 | 0.00000  | 0.00389  |
| 82 | C6 | S   | 0.00000  | 0.15749  | -0.07795 | 0.00000  | 0.20742  |
| 83 | C6 | PX  | 0.00000  | 0.01939  | -0.09810 | 0.00000  | 0.05354  |
| 84 | C6 | PY  | 0.00000  | 0.02363  | 0.05134  | 0.00000  | -0.16354 |
| 85 | C6 | PZ  | 0.03512  | 0.00000  | 0.00000  | 0.00964  | 0.00000  |
| 86 | C6 | S   | 0.00000  | -0.57155 | -1.58051 | 0.00000  | 1.21707  |
| 87 | C6 | PX  | 0.00000  | 0.05705  | -1.13788 | 0.00000  | -0.51592 |



|     |    |     |          |          |          |          |          |
|-----|----|-----|----------|----------|----------|----------|----------|
| 88  | C6 | PY  | 0.00000  | -1.08016 | 0.55522  | 0.00000  | -0.58361 |
| 89  | C6 | PZ  | -0.07549 | 0.00000  | 0.00000  | 0.07183  | 0.00000  |
| 90  | C6 | DXX | 0.00000  | -0.18783 | -0.31250 | 0.00000  | 0.14708  |
| 91  | C6 | DYY | 0.00000  | -0.00439 | 0.25373  | 0.00000  | -0.06903 |
| 92  | C6 | DZZ | 0.00000  | 0.12517  | -0.07025 | 0.00000  | -0.04002 |
| 93  | C6 | DXY | 0.00000  | -0.07515 | -0.08929 | 0.00000  | -0.12556 |
| 94  | C6 | DXZ | -0.23129 | 0.00000  | 0.00000  | 0.01485  | 0.00000  |
| 95  | C6 | DYZ | -0.02476 | 0.00000  | 0.00000  | -0.33984 | 0.00000  |
| 96  | C7 | S   | 0.00000  | -0.03493 | 0.02605  | 0.00000  | -0.00262 |
| 97  | C7 | S   | 0.00000  | -0.32525 | 0.27435  | 0.00000  | 0.06847  |
| 98  | C7 | PX  | 0.00000  | 0.02287  | 0.02441  | 0.00000  | -0.04470 |
| 99  | C7 | PY  | 0.00000  | -0.10532 | 0.06999  | 0.00000  | 0.04618  |
| 100 | C7 | PZ  | 0.01379  | 0.00000  | 0.00000  | 0.03920  | 0.00000  |
| 101 | C7 | S   | 0.00000  | 2.42661  | -2.23153 | 0.00000  | -0.48934 |
| 102 | C7 | PX  | 0.00000  | -0.98616 | 1.40206  | 0.00000  | 0.13872  |
| 103 | C7 | PY  | 0.00000  | 0.12036  | 0.56375  | 0.00000  | 0.48171  |
| 104 | C7 | PZ  | 0.00697  | 0.00000  | 0.00000  | 0.08760  | 0.00000  |
| 105 | C7 | DXX | 0.00000  | 0.07689  | -0.11770 | 0.00000  | -0.00924 |
| 106 | C7 | DYY | 0.00000  | 0.06790  | 0.03921  | 0.00000  | 0.01752  |
| 107 | C7 | DZZ | 0.00000  | -0.21937 | 0.13702  | 0.00000  | -0.05130 |
| 108 | C7 | DXY | 0.00000  | 0.02817  | -0.14487 | 0.00000  | -0.24400 |
| 109 | C7 | DXZ | 0.05669  | 0.00000  | 0.00000  | 0.34468  | 0.00000  |
| 110 | C7 | DYZ | 0.24457  | 0.00000  | 0.00000  | -0.07137 | 0.00000  |
| 111 | O1 | S   | 0.00000  | 0.02194  | 0.01727  | 0.00000  | 0.02824  |
| 112 | O1 | S   | 0.00000  | 0.53565  | -0.17446 | 0.00000  | 0.30646  |
| 113 | O1 | PX  | 0.00000  | -0.00918 | 0.06776  | 0.00000  | -0.04668 |
| 114 | O1 | PY  | 0.00000  | -0.10849 | 0.20512  | 0.00000  | -0.02736 |
| 115 | O1 | PZ  | -0.01000 | 0.00000  | 0.00000  | -0.00850 | 0.00000  |
| 116 | O1 | S   | 0.00000  | -1.64641 | 0.03466  | 0.00000  | -0.98345 |
| 117 | O1 | PX  | 0.00000  | -0.13464 | -0.31818 | 0.00000  | 0.00884  |
| 118 | O1 | PY  | 0.00000  | 0.65495  | -0.61625 | 0.00000  | -0.11573 |
| 119 | O1 | PZ  | 0.01555  | 0.00000  | 0.00000  | 0.03009  | 0.00000  |
| 120 | O1 | DXX | 0.00000  | 0.01535  | -0.08720 | 0.00000  | -0.09386 |
| 121 | O1 | DYY | 0.00000  | -0.17977 | 0.15051  | 0.00000  | 0.06142  |
| 122 | O1 | DZZ | 0.00000  | 0.29923  | -0.03710 | 0.00000  | 0.23449  |
| 123 | O1 | DXY | 0.00000  | -0.01022 | -0.20107 | 0.00000  | -0.23117 |
| 124 | O1 | DXZ | 0.03725  | 0.00000  | 0.00000  | 0.01318  | 0.00000  |
| 125 | O1 | DYZ | -0.09501 | 0.00000  | 0.00000  | -0.06104 | 0.00000  |
| 126 | H4 | S   | 0.00000  | -0.15612 | 0.07252  | 0.00000  | 0.12674  |
| 127 | H4 | S   | 0.00000  | 0.32338  | -0.30393 | 0.00000  | 0.01548  |
| 128 | H4 | PX  | 0.00000  | 0.43042  | 0.31976  | 0.00000  | -0.01369 |
| 129 | H4 | PY  | 0.00000  | 0.05129  | 0.39808  | 0.00000  | 0.00158  |
| 130 | H4 | PZ  | -0.50457 | 0.00000  | 0.00000  | 0.19821  | 0.00000  |
| 131 | N1 | S   | 0.00000  | 0.01698  | -0.00843 | 0.00000  | 0.00922  |
| 132 | N1 | S   | 0.00000  | 0.27490  | -0.31756 | 0.00000  | 0.22652  |
| 133 | N1 | PX  | 0.00000  | -0.01719 | -0.08036 | 0.00000  | -0.00578 |
| 134 | N1 | PY  | 0.00000  | -0.00268 | -0.10145 | 0.00000  | 0.05430  |
| 135 | N1 | PZ  | -0.00959 | 0.00000  | 0.00000  | -0.02926 | 0.00000  |
| 136 | N1 | S   | 0.00000  | -1.24880 | 1.03299  | 0.00000  | -1.09906 |
| 137 | N1 | PX  | 0.00000  | -0.27271 | 0.25991  | 0.00000  | -0.00936 |
| 138 | N1 | PY  | 0.00000  | -0.00376 | 0.27651  | 0.00000  | -0.78233 |
| 139 | N1 | PZ  | 0.09513  | 0.00000  | 0.00000  | -0.04251 | 0.00000  |
| 140 | N1 | DXX | 0.00000  | -0.18542 | -0.19045 | 0.00000  | 0.13931  |
| 141 | N1 | DYY | 0.00000  | 0.06451  | 0.19745  | 0.00000  | -0.22378 |

|     |     |     |          |          |          |          |          |
|-----|-----|-----|----------|----------|----------|----------|----------|
| 142 | N1  | DZZ | 0.00000  | 0.12701  | -0.07207 | 0.00000  | 0.07601  |
| 143 | N1  | DXY | 0.00000  | 0.10064  | 0.08085  | 0.00000  | -0.17101 |
| 144 | N1  | DXZ | 0.28997  | 0.00000  | 0.00000  | 0.09874  | 0.00000  |
| 145 | N1  | DYZ | -0.15797 | 0.00000  | 0.00000  | -0.30169 | 0.00000  |
| 146 | H6  | S   | 0.00000  | 0.21095  | 0.21626  | 0.00000  | -0.03527 |
| 147 | H6  | S   | 0.00000  | -0.07820 | 0.04532  | 0.00000  | 0.19728  |
| 148 | H6  | PX  | 0.00000  | -0.19877 | -0.02737 | 0.00000  | 0.20792  |
| 149 | H6  | PY  | 0.00000  | -0.01722 | -0.08329 | 0.00000  | -0.27043 |
| 150 | H6  | PZ  | -0.51345 | 0.00000  | 0.00000  | 0.01502  | 0.00000  |
| 151 | C8  | S   | 0.00000  | 0.00245  | -0.01772 | 0.00000  | 0.00119  |
| 152 | C8  | S   | 0.00000  | 0.19185  | -0.11092 | 0.00000  | -0.10254 |
| 153 | C8  | PX  | 0.00000  | -0.18030 | -0.02694 | 0.00000  | 0.09590  |
| 154 | C8  | PY  | 0.00000  | 0.02456  | 0.13345  | 0.00000  | 0.14770  |
| 155 | C8  | PZ  | -0.02905 | 0.00000  | 0.00000  | 0.10048  | 0.00000  |
| 156 | C8  | S   | 0.00000  | -0.46244 | 0.74863  | 0.00000  | -0.34664 |
| 157 | C8  | PX  | 0.00000  | -0.75020 | 0.73479  | 0.00000  | 0.24877  |
| 158 | C8  | PY  | 0.00000  | -0.81819 | 1.26521  | 0.00000  | 1.61516  |
| 159 | C8  | PZ  | -0.03917 | 0.00000  | 0.00000  | -0.06547 | 0.00000  |
| 160 | C8  | DXX | 0.00000  | 0.01337  | 0.12576  | 0.00000  | 0.07557  |
| 161 | C8  | DYY | 0.00000  | -0.01155 | -0.01824 | 0.00000  | -0.18858 |
| 162 | C8  | DZZ | 0.00000  | -0.01892 | -0.06384 | 0.00000  | 0.08841  |
| 163 | C8  | DXY | 0.00000  | -0.06900 | 0.06215  | 0.00000  | 0.04859  |
| 164 | C8  | DXZ | 0.30450  | 0.00000  | 0.00000  | 0.14943  | 0.00000  |
| 165 | C8  | DYZ | 0.04007  | 0.00000  | 0.00000  | -0.25336 | 0.00000  |
| 166 | H8  | S   | 0.00000  | -0.07509 | -0.01228 | 0.00000  | -0.01123 |
| 167 | H8  | S   | 0.00000  | 0.24994  | -0.37649 | 0.00000  | 0.03851  |
| 168 | H8  | PX  | 0.00000  | -0.04238 | 0.08156  | 0.00000  | -0.02931 |
| 169 | H8  | PY  | 0.00000  | 0.07120  | -0.12719 | 0.00000  | -0.02987 |
| 170 | H8  | PZ  | -0.06342 | 0.00000  | 0.00000  | -0.47328 | 0.00000  |
| 171 | C10 | S   | 0.00000  | 0.00036  | -0.01271 | 0.00000  | -0.01931 |
| 172 | C10 | S   | 0.00000  | -0.02156 | -0.03107 | 0.00000  | 0.00048  |
| 173 | C10 | PX  | 0.00000  | 0.05292  | -0.02012 | 0.00000  | -0.13213 |
| 174 | C10 | PY  | 0.00000  | -0.01909 | 0.04483  | 0.00000  | 0.18096  |
| 175 | C10 | PZ  | -0.01094 | 0.00000  | 0.00000  | 0.01985  | 0.00000  |
| 176 | C10 | S   | 0.00000  | -0.31807 | 0.73668  | 0.00000  | 1.42042  |
| 177 | C10 | PX  | 0.00000  | 0.48475  | -0.45814 | 0.00000  | -0.39820 |
| 178 | C10 | PY  | 0.00000  | -0.02156 | 0.35818  | 0.00000  | 0.61832  |
| 179 | C10 | PZ  | -0.01261 | 0.00000  | 0.00000  | 0.08908  | 0.00000  |
| 180 | C10 | DXX | 0.00000  | -0.05351 | 0.02764  | 0.00000  | 0.05042  |
| 181 | C10 | DYY | 0.00000  | 0.04764  | 0.07859  | 0.00000  | 0.10524  |
| 182 | C10 | DZZ | 0.00000  | 0.00040  | -0.11467 | 0.00000  | -0.16841 |
| 183 | C10 | DXY | 0.00000  | 0.13499  | -0.02990 | 0.00000  | -0.21872 |
| 184 | C10 | DXZ | 0.17443  | 0.00000  | 0.00000  | 0.26941  | 0.00000  |
| 185 | C10 | DYZ | 0.09094  | 0.00000  | 0.00000  | -0.45213 | 0.00000  |
| 186 | H16 | S   | 0.00000  | -0.00075 | -0.00281 | 0.00000  | -0.08574 |
| 187 | H16 | S   | 0.00000  | -0.22007 | 0.19860  | 0.00000  | 0.23790  |
| 188 | H16 | PX  | 0.00000  | 0.03880  | -0.03448 | 0.00000  | -0.09834 |
| 189 | H16 | PY  | 0.00000  | -0.09341 | -0.07611 | 0.00000  | 0.09259  |
| 190 | H16 | PZ  | -0.13607 | 0.00000  | 0.00000  | -0.52364 | 0.00000  |
| 191 | H18 | S   | 0.00000  | 0.00658  | -0.08708 | 0.00000  | -0.00261 |
| 192 | H18 | S   | 0.00000  | 0.21246  | -0.03441 | 0.00000  | -0.14344 |
| 193 | H18 | PX  | 0.00000  | -0.01621 | 0.01370  | 0.00000  | 0.09386  |
| 194 | H18 | PY  | 0.00000  | 0.12296  | -0.02730 | 0.00000  | -0.20708 |
| 195 | H18 | PZ  | 0.26500  | 0.00000  | 0.00000  | -0.20233 | 0.00000  |

|     |    |     |          |          |          |          |          |
|-----|----|-----|----------|----------|----------|----------|----------|
| 196 | C9 | S   | 0.00000  | -0.00768 | -0.02227 | 0.00000  | -0.00958 |
| 197 | C9 | S   | 0.00000  | 0.01786  | -0.00116 | 0.00000  | 0.06611  |
| 198 | C9 | PX  | 0.00000  | -0.08499 | -0.17147 | 0.00000  | -0.18290 |
| 199 | C9 | PY  | 0.00000  | -0.08806 | -0.04673 | 0.00000  | -0.11051 |
| 200 | C9 | PZ  | -0.00073 | 0.00000  | 0.00000  | 0.00962  | 0.00000  |
| 201 | C9 | S   | 0.00000  | 0.26034  | 0.66881  | 0.00000  | 0.36019  |
| 202 | C9 | PX  | 0.00000  | 0.06704  | -0.36853 | 0.00000  | -0.38834 |
| 203 | C9 | PY  | 0.00000  | -0.23356 | -0.25567 | 0.00000  | 0.11448  |
| 204 | C9 | PZ  | 0.04538  | 0.00000  | 0.00000  | -0.00709 | 0.00000  |
| 205 | C9 | DXX | 0.00000  | -0.08850 | 0.09436  | 0.00000  | 0.09518  |
| 206 | C9 | DYY | 0.00000  | 0.14769  | -0.07600 | 0.00000  | -0.03265 |
| 207 | C9 | DZZ | 0.00000  | -0.04460 | -0.02221 | 0.00000  | 0.00915  |
| 208 | C9 | DXY | 0.00000  | 0.22744  | -0.03312 | 0.00000  | 0.08010  |
| 209 | C9 | DXZ | -0.04949 | 0.00000  | 0.00000  | -0.01121 | 0.00000  |
| 210 | C9 | DYZ | -0.02296 | 0.00000  | 0.00000  | -0.00181 | 0.00000  |
| 211 | H3 | S   | 0.00000  | -0.01827 | -0.01078 | 0.00000  | -0.03929 |
| 212 | H3 | S   | 0.00000  | 0.11701  | -0.00932 | 0.00000  | -0.15812 |
| 213 | H3 | PX  | 0.00000  | -0.22010 | 0.21450  | 0.00000  | 0.15526  |
| 214 | H3 | PY  | 0.00000  | -0.09291 | 0.06590  | 0.00000  | 0.06620  |
| 215 | H3 | PZ  | -0.00803 | 0.00000  | 0.00000  | -0.00125 | 0.00000  |
| 216 | H5 | S   | -0.01467 | 0.00961  | -0.05795 | -0.00200 | 0.03291  |
| 217 | H5 | S   | 0.04232  | -0.14947 | 0.04045  | 0.00283  | -0.00550 |
| 218 | H5 | PX  | -0.05009 | 0.06828  | 0.06834  | -0.01717 | 0.14691  |
| 219 | H5 | PY  | -0.02396 | 0.12915  | 0.01359  | -0.00771 | 0.06521  |
| 220 | H5 | PZ  | -0.00787 | -0.03281 | 0.04439  | 0.00440  | 0.07029  |
| 221 | H7 | S   | 0.01467  | 0.00961  | -0.05795 | 0.00200  | 0.03291  |
| 222 | H7 | S   | -0.04232 | -0.14947 | 0.04045  | -0.00283 | -0.00550 |
| 223 | H7 | PX  | 0.05009  | 0.06828  | 0.06834  | 0.01717  | 0.14691  |
| 224 | H7 | PY  | 0.02396  | 0.12915  | 0.01359  | 0.00771  | 0.06521  |
| 225 | H7 | PZ  | -0.00787 | 0.03281  | -0.04439 | 0.00440  | -0.07029 |

|              |          |          |          |          |          |
|--------------|----------|----------|----------|----------|----------|
| MO:          | 176      | 177      | 178      | 179      | 180      |
| Eigenvalues: | 2.85185  | 2.85480  | 2.88036  | 2.90289  | 2.92225  |
| (ev):        | 77.60292 | 77.68298 | 78.37870 | 78.99170 | 79.51862 |

|    |    | A   | A        | A        | A        | A        |          |
|----|----|-----|----------|----------|----------|----------|----------|
| 1  | H1 | S   | 0.00000  | -0.02579 | 0.00000  | -0.05860 | 0.00125  |
| 2  | H1 | S   | 0.00000  | 0.20113  | 0.00000  | 0.06948  | -0.01798 |
| 3  | H1 | PX  | 0.00000  | -0.06758 | 0.00000  | 0.05083  | -0.15170 |
| 4  | H1 | PY  | 0.00000  | -0.12370 | 0.00000  | -0.24263 | 0.08485  |
| 5  | H1 | PZ  | -0.19835 | 0.00000  | -0.47410 | 0.00000  | 0.00000  |
| 6  | C1 | S   | 0.00000  | -0.00680 | 0.00000  | 0.01547  | -0.02752 |
| 7  | C1 | S   | 0.00000  | 0.01509  | 0.00000  | 0.10653  | -0.11683 |
| 8  | C1 | PX  | 0.00000  | -0.11314 | 0.00000  | -0.05382 | -0.10914 |
| 9  | C1 | PY  | 0.00000  | -0.06232 | 0.00000  | 0.08007  | -0.05751 |
| 10 | C1 | PZ  | 0.02689  | 0.00000  | 0.02666  | 0.00000  | 0.00000  |
| 11 | C1 | S   | 0.00000  | 0.12138  | 0.00000  | -1.19992 | 1.19608  |
| 12 | C1 | PX  | 0.00000  | -0.85678 | 0.00000  | -0.38895 | 0.19202  |
| 13 | C1 | PY  | 0.00000  | 1.74582  | 0.00000  | 2.55666  | -1.51334 |
| 14 | C1 | PZ  | 0.09791  | 0.00000  | 0.07670  | 0.00000  | 0.00000  |
| 15 | C1 | DXX | 0.00000  | 0.18366  | 0.00000  | 0.10111  | 0.04452  |
| 16 | C1 | DYY | 0.00000  | -0.12211 | 0.00000  | -0.17908 | 0.09590  |
| 17 | C1 | DZZ | 0.00000  | -0.07680 | 0.00000  | 0.05458  | -0.18541 |
| 18 | C1 | DXY | 0.00000  | -0.05263 | 0.00000  | -0.07906 | -0.02486 |

|    |    |     |          |          |          |          |          |
|----|----|-----|----------|----------|----------|----------|----------|
| 19 | C1 | DXZ | 0.07471  | 0.00000  | 0.42482  | 0.00000  | 0.00000  |
| 20 | C1 | DYZ | 0.14738  | 0.00000  | -0.02643 | 0.00000  | 0.00000  |
| 21 | C2 | S   | 0.00000  | -0.00472 | 0.00000  | 0.02982  | -0.00031 |
| 22 | C2 | S   | 0.00000  | -0.15250 | 0.00000  | 0.08110  | -0.08028 |
| 23 | C2 | PX  | 0.00000  | -0.03039 | 0.00000  | -0.24491 | 0.03306  |
| 24 | C2 | PY  | 0.00000  | -0.31259 | 0.00000  | 0.03415  | 0.17049  |
| 25 | C2 | PZ  | -0.01230 | 0.00000  | 0.01059  | 0.00000  | 0.00000  |
| 26 | C2 | S   | 0.00000  | -0.24168 | 0.00000  | -0.34662 | 0.69318  |
| 27 | C2 | PX  | 0.00000  | 0.76218  | 0.00000  | -0.95677 | 0.02939  |
| 28 | C2 | PY  | 0.00000  | -3.16160 | 0.00000  | 0.13005  | 1.71444  |
| 29 | C2 | PZ  | -0.05736 | 0.00000  | 0.01326  | 0.00000  | 0.00000  |
| 30 | C2 | DXX | 0.00000  | 0.08494  | 0.00000  | -0.25674 | -0.04756 |
| 31 | C2 | DYY | 0.00000  | -0.19275 | 0.00000  | 0.06477  | 0.10443  |
| 32 | C2 | DZZ | 0.00000  | 0.02553  | 0.00000  | 0.22614  | -0.02895 |
| 33 | C2 | DXY | 0.00000  | -0.18388 | 0.00000  | 0.06696  | 0.25564  |
| 34 | C2 | DXZ | -0.00886 | 0.00000  | -0.18071 | 0.00000  | 0.00000  |
| 35 | C2 | DYZ | -0.15624 | 0.00000  | 0.17096  | 0.00000  | 0.00000  |
| 36 | C3 | S   | 0.00000  | 0.03151  | 0.00000  | -0.00332 | 0.03834  |
| 37 | C3 | S   | 0.00000  | 0.16185  | 0.00000  | 0.10813  | 0.14918  |
| 38 | C3 | PX  | 0.00000  | 0.08206  | 0.00000  | 0.02564  | 0.01485  |
| 39 | C3 | PY  | 0.00000  | -0.06881 | 0.00000  | -0.06122 | -0.04287 |
| 40 | C3 | PZ  | 0.05072  | 0.00000  | 0.01453  | 0.00000  | 0.00000  |
| 41 | C3 | S   | 0.00000  | -1.81454 | 0.00000  | 0.26316  | -1.60599 |
| 42 | C3 | PX  | 0.00000  | 1.39810  | 0.00000  | 1.79603  | -2.49757 |
| 43 | C3 | PY  | 0.00000  | 2.50947  | 0.00000  | 2.54958  | -0.57723 |
| 44 | C3 | PZ  | -0.04661 | 0.00000  | -0.01754 | 0.00000  | 0.00000  |
| 45 | C3 | DXX | 0.00000  | -0.00636 | 0.00000  | -0.14836 | 0.08086  |
| 46 | C3 | DYY | 0.00000  | -0.10407 | 0.00000  | 0.24121  | -0.29761 |
| 47 | C3 | DZZ | 0.00000  | 0.17753  | 0.00000  | -0.04973 | 0.28449  |
| 48 | C3 | DXY | 0.00000  | -0.10077 | 0.00000  | 0.02757  | 0.29818  |
| 49 | C3 | DXZ | 0.28833  | 0.00000  | -0.20606 | 0.00000  | 0.00000  |
| 50 | C3 | DYZ | -0.09280 | 0.00000  | -0.00504 | 0.00000  | 0.00000  |
| 51 | C4 | S   | 0.00000  | 0.00774  | 0.00000  | 0.05329  | 0.00386  |
| 52 | C4 | S   | 0.00000  | 0.08323  | 0.00000  | -0.14079 | 0.25524  |
| 53 | C4 | PX  | 0.00000  | -0.12082 | 0.00000  | -0.08141 | -0.04034 |
| 54 | C4 | PY  | 0.00000  | 0.01951  | 0.00000  | -0.24859 | 0.21070  |
| 55 | C4 | PZ  | 0.00180  | 0.00000  | 0.08020  | 0.00000  | 0.00000  |
| 56 | C4 | S   | 0.00000  | -0.80589 | 0.00000  | -3.04476 | 0.19176  |
| 57 | C4 | PX  | 0.00000  | -1.58567 | 0.00000  | -0.63164 | 0.87690  |
| 58 | C4 | PY  | 0.00000  | 0.82713  | 0.00000  | -0.47023 | 0.66033  |
| 59 | C4 | PZ  | -0.12398 | 0.00000  | -0.10878 | 0.00000  | 0.00000  |
| 60 | C4 | DXX | 0.00000  | 0.22015  | 0.00000  | -0.02251 | -0.02138 |
| 61 | C4 | DYY | 0.00000  | -0.25727 | 0.00000  | -0.27077 | 0.01359  |
| 62 | C4 | DZZ | 0.00000  | 0.06337  | 0.00000  | 0.45339  | -0.04567 |
| 63 | C4 | DXY | 0.00000  | 0.08759  | 0.00000  | -0.11411 | 0.07607  |
| 64 | C4 | DXZ | -0.28439 | 0.00000  | 0.14881  | 0.00000  | 0.00000  |
| 65 | C4 | DYZ | -0.26463 | 0.00000  | -0.10240 | 0.00000  | 0.00000  |
| 66 | C5 | S   | 0.00000  | -0.02906 | 0.00000  | -0.02243 | 0.01889  |
| 67 | C5 | S   | 0.00000  | -0.14838 | 0.00000  | -0.08370 | -0.00208 |
| 68 | C5 | PX  | 0.00000  | -0.10594 | 0.00000  | 0.10687  | 0.00075  |
| 69 | C5 | PY  | 0.00000  | -0.24912 | 0.00000  | -0.07433 | 0.11854  |
| 70 | C5 | PZ  | 0.02823  | 0.00000  | -0.02361 | 0.00000  | 0.00000  |
| 71 | C5 | S   | 0.00000  | 2.09808  | 0.00000  | 0.54125  | -1.04411 |

|     |    |     |          |          |          |          |          |
|-----|----|-----|----------|----------|----------|----------|----------|
| 72  | C5 | PX  | 0.00000  | -1.26176 | 0.00000  | 0.78153  | 0.77038  |
| 73  | C5 | PY  | 0.00000  | -2.09985 | 0.00000  | 0.09142  | 1.13619  |
| 74  | C5 | PZ  | 0.10768  | 0.00000  | 0.02439  | 0.00000  | 0.00000  |
| 75  | C5 | DXX | 0.00000  | -0.23223 | 0.00000  | -0.09613 | 0.05486  |
| 76  | C5 | DYY | 0.00000  | 0.44134  | 0.00000  | 0.13033  | -0.18988 |
| 77  | C5 | DZZ | 0.00000  | -0.25170 | 0.00000  | -0.15249 | 0.13105  |
| 78  | C5 | DXY | 0.00000  | 0.02540  | 0.00000  | -0.09769 | -0.00667 |
| 79  | C5 | DXZ | -0.42214 | 0.00000  | 0.13305  | 0.00000  | 0.00000  |
| 80  | C5 | DYZ | 0.02937  | 0.00000  | 0.09933  | 0.00000  | 0.00000  |
| 81  | C6 | S   | 0.00000  | 0.01189  | 0.00000  | -0.06770 | 0.00919  |
| 82  | C6 | S   | 0.00000  | 0.00791  | 0.00000  | -0.23606 | 0.12819  |
| 83  | C6 | PX  | 0.00000  | 0.02382  | 0.00000  | -0.05915 | -0.06712 |
| 84  | C6 | PY  | 0.00000  | 0.05413  | 0.00000  | 0.23845  | 0.10244  |
| 85  | C6 | PZ  | -0.09556 | 0.00000  | -0.01332 | 0.00000  | 0.00000  |
| 86  | C6 | S   | 0.00000  | -0.20785 | 0.00000  | 2.85803  | -0.59950 |
| 87  | C6 | PX  | 0.00000  | 3.20606  | 0.00000  | 1.22411  | -1.76411 |
| 88  | C6 | PY  | 0.00000  | -0.93276 | 0.00000  | 0.19443  | -0.30772 |
| 89  | C6 | PZ  | -0.03202 | 0.00000  | -0.02224 | 0.00000  | 0.00000  |
| 90  | C6 | DXX | 0.00000  | 0.12322  | 0.00000  | 0.07860  | 0.04800  |
| 91  | C6 | DYY | 0.00000  | -0.18870 | 0.00000  | 0.13715  | -0.13982 |
| 92  | C6 | DZZ | 0.00000  | 0.11491  | 0.00000  | -0.40052 | 0.01064  |
| 93  | C6 | DXY | 0.00000  | 0.15783  | 0.00000  | -0.31926 | -0.16323 |
| 94  | C6 | DXZ | 0.23132  | 0.00000  | -0.21717 | 0.00000  | 0.00000  |
| 95  | C6 | DYZ | 0.43108  | 0.00000  | 0.13161  | 0.00000  | 0.00000  |
| 96  | C7 | S   | 0.00000  | 0.01913  | 0.00000  | 0.02368  | 0.00038  |
| 97  | C7 | S   | 0.00000  | -0.00004 | 0.00000  | 0.01128  | -0.00585 |
| 98  | C7 | PX  | 0.00000  | -0.06660 | 0.00000  | 0.05158  | -0.00226 |
| 99  | C7 | PY  | 0.00000  | 0.06327  | 0.00000  | 0.03130  | 0.30030  |
| 100 | C7 | PZ  | -0.00919 | 0.00000  | 0.02365  | 0.00000  | 0.00000  |
| 101 | C7 | S   | 0.00000  | 0.86443  | 0.00000  | 0.32220  | 0.45703  |
| 102 | C7 | PX  | 0.00000  | -0.80378 | 0.00000  | -0.42867 | 0.55457  |
| 103 | C7 | PY  | 0.00000  | 0.33971  | 0.00000  | -0.24302 | 1.77010  |
| 104 | C7 | PZ  | 0.03857  | 0.00000  | 0.01786  | 0.00000  | 0.00000  |
| 105 | C7 | DXX | 0.00000  | 0.12226  | 0.00000  | 0.01614  | 0.01442  |
| 106 | C7 | DYY | 0.00000  | -0.24694 | 0.00000  | -0.15747 | 0.11877  |
| 107 | C7 | DZZ | 0.00000  | 0.15212  | 0.00000  | 0.18602  | -0.04140 |
| 108 | C7 | DXY | 0.00000  | -0.09453 | 0.00000  | 0.01232  | 0.03234  |
| 109 | C7 | DXZ | 0.20226  | 0.00000  | 0.04633  | 0.00000  | 0.00000  |
| 110 | C7 | DYZ | -0.22922 | 0.00000  | 0.08859  | 0.00000  | 0.00000  |
| 111 | O1 | S   | 0.00000  | 0.01548  | 0.00000  | -0.04827 | 0.02877  |
| 112 | O1 | S   | 0.00000  | 0.26894  | 0.00000  | -0.71403 | 0.53133  |
| 113 | O1 | PX  | 0.00000  | 0.00860  | 0.00000  | -0.09597 | -0.00538 |
| 114 | O1 | PY  | 0.00000  | -0.06634 | 0.00000  | -0.05995 | -0.03172 |
| 115 | O1 | PZ  | -0.03179 | 0.00000  | -0.04117 | 0.00000  | 0.00000  |
| 116 | O1 | S   | 0.00000  | -0.86704 | 0.00000  | 2.63501  | -1.68810 |
| 117 | O1 | PX  | 0.00000  | -0.14093 | 0.00000  | 0.75024  | -0.27792 |
| 118 | O1 | PY  | 0.00000  | -0.22522 | 0.00000  | -0.64965 | 0.36923  |
| 119 | O1 | PZ  | 0.19369  | 0.00000  | 0.31405  | 0.00000  | 0.00000  |
| 120 | O1 | DXX | 0.00000  | 0.10080  | 0.00000  | 0.11190  | -0.03159 |
| 121 | O1 | DYY | 0.00000  | -0.01447 | 0.00000  | 0.13596  | -0.09270 |
| 122 | O1 | DZZ | 0.00000  | 0.09355  | 0.00000  | -0.43195 | 0.28637  |
| 123 | O1 | DXY | 0.00000  | -0.33207 | 0.00000  | -0.05288 | -0.10348 |
| 124 | O1 | DXZ | 0.14239  | 0.00000  | 0.33118  | 0.00000  | 0.00000  |
| 125 | O1 | DYZ | -0.17908 | 0.00000  | 0.19515  | 0.00000  | 0.00000  |

|     |     |     |          |          |          |          |          |
|-----|-----|-----|----------|----------|----------|----------|----------|
| 126 | H4  | S   | 0.00000  | -0.08765 | 0.00000  | -0.02581 | 0.04896  |
| 127 | H4  | S   | 0.00000  | 0.14752  | 0.00000  | 0.24942  | -0.09222 |
| 128 | H4  | PX  | 0.00000  | 0.10868  | 0.00000  | -0.07627 | -0.15890 |
| 129 | H4  | PY  | 0.00000  | -0.00322 | 0.00000  | -0.32601 | -0.11797 |
| 130 | H4  | PZ  | -0.41136 | 0.00000  | 0.01925  | 0.00000  | 0.00000  |
| 131 | N1  | S   | 0.00000  | -0.01167 | 0.00000  | 0.00255  | 0.02173  |
| 132 | N1  | S   | 0.00000  | -0.08332 | 0.00000  | 0.13816  | 0.28309  |
| 133 | N1  | PX  | 0.00000  | -0.03709 | 0.00000  | 0.00601  | -0.01347 |
| 134 | N1  | PY  | 0.00000  | 0.08219  | 0.00000  | -0.09597 | 0.12345  |
| 135 | N1  | PZ  | 0.03790  | 0.00000  | 0.00368  | 0.00000  | 0.00000  |
| 136 | N1  | S   | 0.00000  | 0.43242  | 0.00000  | -0.97303 | -1.10556 |
| 137 | N1  | PX  | 0.00000  | -0.00468 | 0.00000  | -0.73782 | -0.28494 |
| 138 | N1  | PY  | 0.00000  | -0.08063 | 0.00000  | 0.35219  | -0.09713 |
| 139 | N1  | PZ  | 0.13188  | 0.00000  | 0.03398  | 0.00000  | 0.00000  |
| 140 | N1  | DXX | 0.00000  | 0.09306  | 0.00000  | -0.31642 | -0.27747 |
| 141 | N1  | DYY | 0.00000  | 0.02000  | 0.00000  | 0.20984  | 0.15442  |
| 142 | N1  | DZZ | 0.00000  | -0.09881 | 0.00000  | 0.02560  | 0.19200  |
| 143 | N1  | DXY | 0.00000  | -0.11645 | 0.00000  | 0.04102  | 0.22865  |
| 144 | N1  | DXZ | -0.02947 | 0.00000  | 0.05004  | 0.00000  | 0.00000  |
| 145 | N1  | DYZ | 0.44553  | 0.00000  | 0.08683  | 0.00000  | 0.00000  |
| 146 | H6  | S   | 0.00000  | -0.03500 | 0.00000  | -0.01376 | 0.02275  |
| 147 | H6  | S   | 0.00000  | -0.06557 | 0.00000  | -0.42093 | 0.20389  |
| 148 | H6  | PX  | 0.00000  | -0.17666 | 0.00000  | -0.16988 | 0.12695  |
| 149 | H6  | PY  | 0.00000  | 0.54267  | 0.00000  | -0.12683 | -0.05779 |
| 150 | H6  | PZ  | -0.01816 | 0.00000  | -0.13574 | 0.00000  | 0.00000  |
| 151 | C8  | S   | 0.00000  | -0.01593 | 0.00000  | -0.00331 | -0.06101 |
| 152 | C8  | S   | 0.00000  | -0.02317 | 0.00000  | 0.16367  | -0.17235 |
| 153 | C8  | PX  | 0.00000  | 0.13841  | 0.00000  | -0.20059 | -0.23946 |
| 154 | C8  | PY  | 0.00000  | -0.11064 | 0.00000  | 0.22780  | -0.09399 |
| 155 | C8  | PZ  | 0.03273  | 0.00000  | -0.01532 | 0.00000  | 0.00000  |
| 156 | C8  | S   | 0.00000  | 0.34599  | 0.00000  | -0.22664 | 2.53045  |
| 157 | C8  | PX  | 0.00000  | 0.65437  | 0.00000  | -0.65600 | 0.40921  |
| 158 | C8  | PY  | 0.00000  | -0.84105 | 0.00000  | 0.55991  | 0.60363  |
| 159 | C8  | PZ  | -0.04393 | 0.00000  | 0.00015  | 0.00000  | 0.00000  |
| 160 | C8  | DXX | 0.00000  | 0.00726  | 0.00000  | 0.17188  | 0.12753  |
| 161 | C8  | DYY | 0.00000  | 0.15957  | 0.00000  | -0.15573 | 0.31115  |
| 162 | C8  | DZZ | 0.00000  | -0.18499 | 0.00000  | -0.01046 | -0.45550 |
| 163 | C8  | DXY | 0.00000  | -0.00021 | 0.00000  | 0.20108  | 0.13517  |
| 164 | C8  | DXZ | -0.05983 | 0.00000  | -0.01884 | 0.00000  | 0.00000  |
| 165 | C8  | DYZ | -0.06489 | 0.00000  | 0.07087  | 0.00000  | 0.00000  |
| 166 | H8  | S   | 0.00000  | 0.01615  | 0.00000  | 0.02424  | -0.08909 |
| 167 | H8  | S   | 0.00000  | 0.30616  | 0.00000  | 0.13578  | -0.20063 |
| 168 | H8  | PX  | 0.00000  | -0.09163 | 0.00000  | 0.01386  | -0.00566 |
| 169 | H8  | PY  | 0.00000  | -0.05040 | 0.00000  | -0.11165 | -0.60407 |
| 170 | H8  | PZ  | -0.24322 | 0.00000  | -0.06633 | 0.00000  | 0.00000  |
| 171 | C10 | S   | 0.00000  | 0.01719  | 0.00000  | -0.01296 | 0.00832  |
| 172 | C10 | S   | 0.00000  | 0.00250  | 0.00000  | -0.00825 | -0.07556 |
| 173 | C10 | PX  | 0.00000  | -0.02770 | 0.00000  | 0.06885  | 0.18009  |
| 174 | C10 | PY  | 0.00000  | -0.17444 | 0.00000  | 0.16980  | -0.23307 |
| 175 | C10 | PZ  | 0.00253  | 0.00000  | 0.00365  | 0.00000  | 0.00000  |
| 176 | C10 | S   | 0.00000  | -0.98273 | 0.00000  | 0.70710  | -0.40717 |
| 177 | C10 | PX  | 0.00000  | -0.14467 | 0.00000  | 0.08062  | 0.18263  |
| 178 | C10 | PY  | 0.00000  | -0.52170 | 0.00000  | 0.50451  | -0.08822 |
| 179 | C10 | PZ  | 0.02411  | 0.00000  | -0.01079 | 0.00000  | 0.00000  |

|     |     |     |          |          |          |          |          |
|-----|-----|-----|----------|----------|----------|----------|----------|
| 180 | C10 | DXX | 0.00000  | 0.05819  | 0.00000  | -0.00836 | -0.00548 |
| 181 | C10 | DYY | 0.00000  | -0.18231 | 0.00000  | 0.16861  | -0.04494 |
| 182 | C10 | DZZ | 0.00000  | 0.16546  | 0.00000  | -0.13394 | 0.07352  |
| 183 | C10 | DXY | 0.00000  | -0.05554 | 0.00000  | 0.11776  | 0.23428  |
| 184 | C10 | DXZ | -0.28846 | 0.00000  | 0.17649  | 0.00000  | 0.00000  |
| 185 | C10 | DYZ | -0.15242 | 0.00000  | 0.12978  | 0.00000  | 0.00000  |
| 186 | H16 | S   | 0.00000  | 0.03040  | 0.00000  | -0.01714 | -0.00880 |
| 187 | H16 | S   | 0.00000  | 0.10064  | 0.00000  | -0.04934 | -0.09540 |
| 188 | H16 | PX  | 0.00000  | 0.01553  | 0.00000  | -0.00038 | 0.16219  |
| 189 | H16 | PY  | 0.00000  | 0.12005  | 0.00000  | -0.22690 | -0.17551 |
| 190 | H16 | PZ  | 0.20861  | 0.00000  | -0.11466 | 0.00000  | 0.00000  |
| 191 | H18 | S   | 0.00000  | 0.03873  | 0.00000  | -0.06947 | -0.03686 |
| 192 | H18 | S   | 0.00000  | -0.17559 | 0.00000  | 0.21521  | 0.22852  |
| 193 | H18 | PX  | 0.00000  | -0.06679 | 0.00000  | 0.09349  | -0.09500 |
| 194 | H18 | PY  | 0.00000  | -0.08355 | 0.00000  | 0.05695  | 0.22646  |
| 195 | H18 | PZ  | -0.34460 | 0.00000  | 0.22244  | 0.00000  | 0.00000  |
| 196 | C9  | S   | 0.00000  | -0.00856 | 0.00000  | 0.03176  | -0.01661 |
| 197 | C9  | S   | 0.00000  | 0.10304  | 0.00000  | 0.00529  | 0.01416  |
| 198 | C9  | PX  | 0.00000  | -0.21416 | 0.00000  | 0.24970  | -0.18086 |
| 199 | C9  | PY  | 0.00000  | -0.05340 | 0.00000  | 0.15194  | -0.07672 |
| 200 | C9  | PZ  | -0.01763 | 0.00000  | -0.12769 | 0.00000  | 0.00000  |
| 201 | C9  | S   | 0.00000  | 0.31421  | 0.00000  | -0.99123 | 0.45246  |
| 202 | C9  | PX  | 0.00000  | -0.48354 | 0.00000  | 0.09080  | -0.18902 |
| 203 | C9  | PY  | 0.00000  | 0.33737  | 0.00000  | 0.80396  | -0.26390 |
| 204 | C9  | PZ  | -0.17863 | 0.00000  | -0.61639 | 0.00000  | 0.00000  |
| 205 | C9  | DXX | 0.00000  | 0.14559  | 0.00000  | 0.13381  | -0.02907 |
| 206 | C9  | DYY | 0.00000  | -0.25297 | 0.00000  | -0.14398 | -0.00911 |
| 207 | C9  | DZZ | 0.00000  | 0.10042  | 0.00000  | 0.05981  | 0.03014  |
| 208 | C9  | DXY | 0.00000  | -0.08153 | 0.00000  | -0.23536 | 0.08737  |
| 209 | C9  | DXZ | 0.08762  | 0.00000  | 0.43439  | 0.00000  | 0.00000  |
| 210 | C9  | DYZ | -0.01716 | 0.00000  | 0.04108  | 0.00000  | 0.00000  |
| 211 | H3  | S   | 0.00000  | -0.01234 | 0.00000  | -0.00332 | 0.00218  |
| 212 | H3  | S   | 0.00000  | -0.32981 | 0.00000  | -0.30375 | 0.04931  |
| 213 | H3  | PX  | 0.00000  | 0.34019  | 0.00000  | 0.08002  | 0.07913  |
| 214 | H3  | PY  | 0.00000  | 0.13009  | 0.00000  | 0.11529  | -0.01017 |
| 215 | H3  | PZ  | 0.12983  | 0.00000  | 0.38622  | 0.00000  | 0.00000  |
| 216 | H5  | S   | 0.00108  | 0.01314  | 0.03572  | 0.09777  | -0.04116 |
| 217 | H5  | S   | -0.08791 | 0.11899  | -0.39100 | 0.19745  | -0.03571 |
| 218 | H5  | PX  | 0.04817  | 0.13321  | 0.34104  | -0.11942 | 0.13245  |
| 219 | H5  | PY  | -0.03449 | -0.10875 | -0.01789 | -0.18716 | 0.06037  |
| 220 | H5  | PZ  | 0.03520  | 0.18423  | 0.07121  | 0.01686  | 0.06999  |
| 221 | H7  | S   | -0.00108 | 0.01314  | -0.03572 | 0.09777  | -0.04116 |
| 222 | H7  | S   | 0.08791  | 0.11899  | 0.39100  | 0.19745  | -0.03571 |
| 223 | H7  | PX  | -0.04817 | 0.13321  | -0.34104 | -0.11942 | 0.13245  |
| 224 | H7  | PY  | 0.03449  | -0.10875 | 0.01789  | -0.18716 | 0.06037  |
| 225 | H7  | PZ  | 0.03520  | -0.18423 | 0.07121  | -0.01686 | -0.06999 |

|              |          |          |          |          |          |
|--------------|----------|----------|----------|----------|----------|
| M0:          | 181      | 182      | 183      | 184      | 185      |
| Eigenvalues: | 2.94553  | 2.94938  | 2.97878  | 3.01727  | 3.01793  |
| (ev):        | 80.15209 | 80.25685 | 81.05685 | 82.10424 | 82.12217 |

|   |    |   |         |          |         |          |         |
|---|----|---|---------|----------|---------|----------|---------|
|   |    | A | A       | A        | A       | A        |         |
| 1 | H1 | S | 0.00000 | -0.10624 | 0.00000 | -0.09706 | 0.00000 |
| 2 | H1 | S | 0.00000 | 0.05306  | 0.00000 | -0.16669 | 0.00000 |

|    |    |     |          |          |          |          |          |
|----|----|-----|----------|----------|----------|----------|----------|
| 3  | H1 | PX  | 0.00000  | -0.04889 | 0.00000  | -0.15534 | 0.00000  |
| 4  | H1 | PY  | 0.00000  | -0.14138 | 0.00000  | 0.37878  | 0.00000  |
| 5  | H1 | PZ  | -0.30449 | 0.00000  | -0.06437 | 0.00000  | 0.12034  |
| 6  | C1 | S   | 0.00000  | -0.02180 | 0.00000  | -0.04293 | 0.00000  |
| 7  | C1 | S   | 0.00000  | -0.06441 | 0.00000  | -0.01568 | 0.00000  |
| 8  | C1 | PX  | 0.00000  | -0.13272 | 0.00000  | -0.11929 | 0.00000  |
| 9  | C1 | PY  | 0.00000  | -0.07582 | 0.00000  | 0.15184  | 0.00000  |
| 10 | C1 | PZ  | 0.00010  | 0.00000  | -0.01609 | 0.00000  | 0.04020  |
| 11 | C1 | S   | 0.00000  | 1.09094  | 0.00000  | 0.97688  | 0.00000  |
| 12 | C1 | PX  | 0.00000  | -0.46340 | 0.00000  | 0.98631  | 0.00000  |
| 13 | C1 | PY  | 0.00000  | 1.49613  | 0.00000  | -1.88169 | 0.00000  |
| 14 | C1 | PZ  | 0.04819  | 0.00000  | 0.03091  | 0.00000  | 0.03282  |
| 15 | C1 | DXX | 0.00000  | 0.12368  | 0.00000  | 0.10072  | 0.00000  |
| 16 | C1 | DYY | 0.00000  | 0.03088  | 0.00000  | 0.07453  | 0.00000  |
| 17 | C1 | DZZ | 0.00000  | -0.17930 | 0.00000  | -0.32900 | 0.00000  |
| 18 | C1 | DXY | 0.00000  | -0.05096 | 0.00000  | -0.34579 | 0.00000  |
| 19 | C1 | DXZ | 0.25809  | 0.00000  | 0.06739  | 0.00000  | -0.27956 |
| 20 | C1 | DYZ | 0.19486  | 0.00000  | 0.02565  | 0.00000  | 0.24097  |
| 21 | C2 | S   | 0.00000  | 0.00451  | 0.00000  | -0.00986 | 0.00000  |
| 22 | C2 | S   | 0.00000  | 0.01171  | 0.00000  | -0.06691 | 0.00000  |
| 23 | C2 | PX  | 0.00000  | 0.05798  | 0.00000  | 0.13268  | 0.00000  |
| 24 | C2 | PY  | 0.00000  | 0.06098  | 0.00000  | -0.17526 | 0.00000  |
| 25 | C2 | PZ  | -0.02602 | 0.00000  | 0.00966  | 0.00000  | -0.00254 |
| 26 | C2 | S   | 0.00000  | -0.34159 | 0.00000  | 0.74961  | 0.00000  |
| 27 | C2 | PX  | 0.00000  | 0.37661  | 0.00000  | 0.43237  | 0.00000  |
| 28 | C2 | PY  | 0.00000  | -0.29825 | 0.00000  | 2.05918  | 0.00000  |
| 29 | C2 | PZ  | 0.04543  | 0.00000  | -0.01976 | 0.00000  | -0.08845 |
| 30 | C2 | DXX | 0.00000  | 0.13370  | 0.00000  | 0.13494  | 0.00000  |
| 31 | C2 | DYY | 0.00000  | -0.09548 | 0.00000  | -0.04420 | 0.00000  |
| 32 | C2 | DZZ | 0.00000  | 0.00634  | 0.00000  | -0.03559 | 0.00000  |
| 33 | C2 | DXY | 0.00000  | -0.11161 | 0.00000  | -0.06360 | 0.00000  |
| 34 | C2 | DXZ | -0.28885 | 0.00000  | 0.08565  | 0.00000  | 0.38337  |
| 35 | C2 | DYZ | -0.41836 | 0.00000  | -0.08317 | 0.00000  | -0.17567 |
| 36 | C3 | S   | 0.00000  | 0.01521  | 0.00000  | -0.05194 | 0.00000  |
| 37 | C3 | S   | 0.00000  | -0.01264 | 0.00000  | -0.38858 | 0.00000  |
| 38 | C3 | PX  | 0.00000  | -0.00982 | 0.00000  | -0.16624 | 0.00000  |
| 39 | C3 | PY  | 0.00000  | -0.02702 | 0.00000  | 0.14373  | 0.00000  |
| 40 | C3 | PZ  | 0.00744  | 0.00000  | 0.02435  | 0.00000  | 0.01254  |
| 41 | C3 | S   | 0.00000  | 0.20949  | 0.00000  | 3.16397  | 0.00000  |
| 42 | C3 | PX  | 0.00000  | -0.14282 | 0.00000  | -3.93545 | 0.00000  |
| 43 | C3 | PY  | 0.00000  | 0.87176  | 0.00000  | -2.62850 | 0.00000  |
| 44 | C3 | PZ  | -0.05597 | 0.00000  | -0.03368 | 0.00000  | -0.05289 |
| 45 | C3 | DXX | 0.00000  | 0.07350  | 0.00000  | 0.32230  | 0.00000  |
| 46 | C3 | DYY | 0.00000  | -0.15395 | 0.00000  | -0.14792 | 0.00000  |
| 47 | C3 | DZZ | 0.00000  | 0.14051  | 0.00000  | -0.21449 | 0.00000  |
| 48 | C3 | DXY | 0.00000  | 0.13006  | 0.00000  | 0.30821  | 0.00000  |
| 49 | C3 | DXZ | -0.03047 | 0.00000  | 0.21142  | 0.00000  | 0.06732  |
| 50 | C3 | DYZ | 0.23334  | 0.00000  | -0.02828 | 0.00000  | 0.15617  |
| 51 | C4 | S   | 0.00000  | -0.00546 | 0.00000  | 0.06604  | 0.00000  |
| 52 | C4 | S   | 0.00000  | 0.00829  | 0.00000  | -0.37607 | 0.00000  |
| 53 | C4 | PX  | 0.00000  | -0.07542 | 0.00000  | -0.09390 | 0.00000  |
| 54 | C4 | PY  | 0.00000  | 0.21648  | 0.00000  | -0.06018 | 0.00000  |
| 55 | C4 | PZ  | -0.01098 | 0.00000  | -0.01363 | 0.00000  | 0.01775  |
| 56 | C4 | S   | 0.00000  | 0.01155  | 0.00000  | -1.26053 | 0.00000  |



|     |    |     |          |          |          |          |          |
|-----|----|-----|----------|----------|----------|----------|----------|
| 57  | C4 | PX  | 0.00000  | -1.91096 | 0.00000  | 1.92200  | 0.00000  |
| 58  | C4 | PY  | 0.00000  | 0.53877  | 0.00000  | -0.71607 | 0.00000  |
| 59  | C4 | PZ  | -0.00781 | 0.00000  | -0.03016 | 0.00000  | -0.04189 |
| 60  | C4 | DXX | 0.00000  | 0.06459  | 0.00000  | -0.34138 | 0.00000  |
| 61  | C4 | DYY | 0.00000  | 0.02657  | 0.00000  | -0.13310 | 0.00000  |
| 62  | C4 | DZZ | 0.00000  | -0.04280 | 0.00000  | 0.55948  | 0.00000  |
| 63  | C4 | DXY | 0.00000  | 0.17933  | 0.00000  | -0.22992 | 0.00000  |
| 64  | C4 | DXZ | -0.08518 | 0.00000  | -0.03129 | 0.00000  | -0.34299 |
| 65  | C4 | DYZ | -0.15302 | 0.00000  | -0.18367 | 0.00000  | 0.28841  |
| 66  | C5 | S   | 0.00000  | 0.02613  | 0.00000  | -0.04418 | 0.00000  |
| 67  | C5 | S   | 0.00000  | 0.14533  | 0.00000  | -0.01070 | 0.00000  |
| 68  | C5 | PX  | 0.00000  | -0.04711 | 0.00000  | 0.15678  | 0.00000  |
| 69  | C5 | PY  | 0.00000  | -0.05078 | 0.00000  | 0.09530  | 0.00000  |
| 70  | C5 | PZ  | 0.03885  | 0.00000  | 0.01496  | 0.00000  | -0.00745 |
| 71  | C5 | S   | 0.00000  | -1.19461 | 0.00000  | 0.09875  | 0.00000  |
| 72  | C5 | PX  | 0.00000  | -1.03628 | 0.00000  | 1.43417  | 0.00000  |
| 73  | C5 | PY  | 0.00000  | -0.66594 | 0.00000  | 1.46117  | 0.00000  |
| 74  | C5 | PZ  | -0.04287 | 0.00000  | 0.02749  | 0.00000  | 0.06639  |
| 75  | C5 | DXX | 0.00000  | 0.01063  | 0.00000  | 0.36470  | 0.00000  |
| 76  | C5 | DYY | 0.00000  | -0.11086 | 0.00000  | -0.09003 | 0.00000  |
| 77  | C5 | DZZ | 0.00000  | 0.15563  | 0.00000  | -0.30433 | 0.00000  |
| 78  | C5 | DXY | 0.00000  | -0.09357 | 0.00000  | 0.21223  | 0.00000  |
| 79  | C5 | DXZ | 0.05174  | 0.00000  | -0.13095 | 0.00000  | -0.26832 |
| 80  | C5 | DYZ | -0.47691 | 0.00000  | 0.03148  | 0.00000  | -0.06755 |
| 81  | C6 | S   | 0.00000  | 0.01507  | 0.00000  | 0.09406  | 0.00000  |
| 82  | C6 | S   | 0.00000  | 0.02100  | 0.00000  | 0.53378  | 0.00000  |
| 83  | C6 | PX  | 0.00000  | 0.03549  | 0.00000  | -0.04604 | 0.00000  |
| 84  | C6 | PY  | 0.00000  | -0.11026 | 0.00000  | -0.04343 | 0.00000  |
| 85  | C6 | PZ  | 0.03510  | 0.00000  | -0.02517 | 0.00000  | 0.04503  |
| 86  | C6 | S   | 0.00000  | -0.07221 | 0.00000  | -3.87472 | 0.00000  |
| 87  | C6 | PX  | 0.00000  | -0.04491 | 0.00000  | -4.06144 | 0.00000  |
| 88  | C6 | PY  | 0.00000  | -0.27124 | 0.00000  | -1.30567 | 0.00000  |
| 89  | C6 | PZ  | 0.01778  | 0.00000  | 0.03615  | 0.00000  | 0.15046  |
| 90  | C6 | DXX | 0.00000  | 0.03998  | 0.00000  | -0.42004 | 0.00000  |
| 91  | C6 | DYY | 0.00000  | -0.08354 | 0.00000  | -0.08734 | 0.00000  |
| 92  | C6 | DZZ | 0.00000  | 0.07095  | 0.00000  | 0.50689  | 0.00000  |
| 93  | C6 | DXY | 0.00000  | 0.01459  | 0.00000  | 0.05397  | 0.00000  |
| 94  | C6 | DXZ | 0.14014  | 0.00000  | 0.22960  | 0.00000  | 0.19998  |
| 95  | C6 | DYZ | -0.09177 | 0.00000  | 0.07953  | 0.00000  | -0.48265 |
| 96  | C7 | S   | 0.00000  | 0.00770  | 0.00000  | -0.02306 | 0.00000  |
| 97  | C7 | S   | 0.00000  | 0.09074  | 0.00000  | 0.12381  | 0.00000  |
| 98  | C7 | PX  | 0.00000  | -0.07908 | 0.00000  | -0.02505 | 0.00000  |
| 99  | C7 | PY  | 0.00000  | 0.09637  | 0.00000  | 0.08347  | 0.00000  |
| 100 | C7 | PZ  | 0.01581  | 0.00000  | 0.00946  | 0.00000  | 0.00631  |
| 101 | C7 | S   | 0.00000  | -0.34322 | 0.00000  | -0.93374 | 0.00000  |
| 102 | C7 | PX  | 0.00000  | 0.15941  | 0.00000  | 1.47968  | 0.00000  |
| 103 | C7 | PY  | 0.00000  | 0.81974  | 0.00000  | 0.91055  | 0.00000  |
| 104 | C7 | PZ  | 0.00715  | 0.00000  | -0.00084 | 0.00000  | -0.00805 |
| 105 | C7 | DXX | 0.00000  | 0.06292  | 0.00000  | -0.07925 | 0.00000  |
| 106 | C7 | DYY | 0.00000  | -0.04187 | 0.00000  | 0.22083  | 0.00000  |
| 107 | C7 | DZZ | 0.00000  | 0.01274  | 0.00000  | -0.19546 | 0.00000  |
| 108 | C7 | DXY | 0.00000  | -0.03035 | 0.00000  | -0.20135 | 0.00000  |
| 109 | C7 | DXZ | 0.08545  | 0.00000  | 0.02060  | 0.00000  | 0.08527  |
| 110 | C7 | DYZ | 0.21302  | 0.00000  | -0.23470 | 0.00000  | 0.09122  |

|     |    |     |          |          |          |          |          |
|-----|----|-----|----------|----------|----------|----------|----------|
| 111 | O1 | S   | 0.00000  | -0.01636 | 0.00000  | -0.01922 | 0.00000  |
| 112 | O1 | S   | 0.00000  | -0.26086 | 0.00000  | -0.47104 | 0.00000  |
| 113 | O1 | PX  | 0.00000  | -0.12488 | 0.00000  | -0.05475 | 0.00000  |
| 114 | O1 | PY  | 0.00000  | -0.05306 | 0.00000  | 0.03378  | 0.00000  |
| 115 | O1 | PZ  | -0.00183 | 0.00000  | 0.00443  | 0.00000  | -0.02918 |
| 116 | O1 | S   | 0.00000  | 0.77164  | 0.00000  | 1.49566  | 0.00000  |
| 117 | O1 | PX  | 0.00000  | 0.78434  | 0.00000  | 0.09720  | 0.00000  |
| 118 | O1 | PY  | 0.00000  | 0.44875  | 0.00000  | -0.76020 | 0.00000  |
| 119 | O1 | PZ  | -0.00286 | 0.00000  | -0.00590 | 0.00000  | 0.08473  |
| 120 | O1 | DXX | 0.00000  | 0.29414  | 0.00000  | -0.01142 | 0.00000  |
| 121 | O1 | DYY | 0.00000  | -0.37513 | 0.00000  | 0.24418  | 0.00000  |
| 122 | O1 | DZZ | 0.00000  | -0.10961 | 0.00000  | -0.27604 | 0.00000  |
| 123 | O1 | DXY | 0.00000  | 0.05906  | 0.00000  | -0.19973 | 0.00000  |
| 124 | O1 | DXZ | -0.08683 | 0.00000  | -0.08852 | 0.00000  | 0.23157  |
| 125 | O1 | DYZ | -0.18102 | 0.00000  | -0.19829 | 0.00000  | 0.29123  |
| 126 | H4 | S   | 0.00000  | 0.02681  | 0.00000  | -0.02515 | 0.00000  |
| 127 | H4 | S   | 0.00000  | -0.00689 | 0.00000  | -0.01673 | 0.00000  |
| 128 | H4 | PX  | 0.00000  | 0.23279  | 0.00000  | -0.11097 | 0.00000  |
| 129 | H4 | PY  | 0.00000  | 0.24320  | 0.00000  | -0.04395 | 0.00000  |
| 130 | H4 | PZ  | 0.35248  | 0.00000  | -0.12281 | 0.00000  | -0.14693 |
| 131 | N1 | S   | 0.00000  | -0.00133 | 0.00000  | 0.01148  | 0.00000  |
| 132 | N1 | S   | 0.00000  | -0.05055 | 0.00000  | 0.15339  | 0.00000  |
| 133 | N1 | PX  | 0.00000  | -0.02529 | 0.00000  | -0.07559 | 0.00000  |
| 134 | N1 | PY  | 0.00000  | 0.06200  | 0.00000  | 0.12618  | 0.00000  |
| 135 | N1 | PZ  | 0.00200  | 0.00000  | -0.00503 | 0.00000  | -0.03656 |
| 136 | N1 | S   | 0.00000  | 0.16185  | 0.00000  | -0.72554 | 0.00000  |
| 137 | N1 | PX  | 0.00000  | 0.25376  | 0.00000  | 0.55895  | 0.00000  |
| 138 | N1 | PY  | 0.00000  | -0.40143 | 0.00000  | -0.51888 | 0.00000  |
| 139 | N1 | PZ  | -0.08700 | 0.00000  | -0.10471 | 0.00000  | -0.21285 |
| 140 | N1 | DXX | 0.00000  | 0.10064  | 0.00000  | -0.03995 | 0.00000  |
| 141 | N1 | DYY | 0.00000  | -0.04845 | 0.00000  | 0.01406  | 0.00000  |
| 142 | N1 | DZZ | 0.00000  | -0.02268 | 0.00000  | 0.01759  | 0.00000  |
| 143 | N1 | DXY | 0.00000  | -0.10262 | 0.00000  | 0.19492  | 0.00000  |
| 144 | N1 | DXZ | -0.16035 | 0.00000  | -0.37171 | 0.00000  | -0.22486 |
| 145 | N1 | DYZ | -0.10318 | 0.00000  | 0.20450  | 0.00000  | -0.37625 |
| 146 | H6 | S   | 0.00000  | 0.04632  | 0.00000  | 0.08616  | 0.00000  |
| 147 | H6 | S   | 0.00000  | 0.14018  | 0.00000  | 0.35422  | 0.00000  |
| 148 | H6 | PX  | 0.00000  | 0.10782  | 0.00000  | 0.06740  | 0.00000  |
| 149 | H6 | PY  | 0.00000  | -0.12798 | 0.00000  | -0.07620 | 0.00000  |
| 150 | H6 | PZ  | -0.38872 | 0.00000  | 0.05253  | 0.00000  | 0.30712  |
| 151 | C8 | S   | 0.00000  | -0.02164 | 0.00000  | -0.02474 | 0.00000  |
| 152 | C8 | S   | 0.00000  | -0.21555 | 0.00000  | -0.11740 | 0.00000  |
| 153 | C8 | PX  | 0.00000  | 0.07314  | 0.00000  | 0.02169  | 0.00000  |
| 154 | C8 | PY  | 0.00000  | -0.12389 | 0.00000  | -0.01814 | 0.00000  |
| 155 | C8 | PZ  | -0.04610 | 0.00000  | -0.00050 | 0.00000  | -0.01931 |
| 156 | C8 | S   | 0.00000  | 0.90457  | 0.00000  | 1.09164  | 0.00000  |
| 157 | C8 | PX  | 0.00000  | 0.87397  | 0.00000  | 0.41679  | 0.00000  |
| 158 | C8 | PY  | 0.00000  | 0.45515  | 0.00000  | 0.92350  | 0.00000  |
| 159 | C8 | PZ  | 0.04816  | 0.00000  | 0.05782  | 0.00000  | 0.04928  |
| 160 | C8 | DXX | 0.00000  | -0.02914 | 0.00000  | 0.07594  | 0.00000  |
| 161 | C8 | DYY | 0.00000  | 0.15935  | 0.00000  | 0.04647  | 0.00000  |
| 162 | C8 | DZZ | 0.00000  | -0.14042 | 0.00000  | -0.11470 | 0.00000  |
| 163 | C8 | DXY | 0.00000  | -0.03134 | 0.00000  | -0.15164 | 0.00000  |
| 164 | C8 | DXZ | -0.02039 | 0.00000  | -0.51511 | 0.00000  | -0.07251 |

|     |     |     |          |          |          |          |          |
|-----|-----|-----|----------|----------|----------|----------|----------|
| 165 | C8  | DYZ | 0.41800  | 0.00000  | 0.11580  | 0.00000  | 0.31202  |
| 166 | H8  | S   | 0.00000  | -0.01623 | 0.00000  | -0.12815 | 0.00000  |
| 167 | H8  | S   | 0.00000  | 0.02811  | 0.00000  | -0.46917 | 0.00000  |
| 168 | H8  | PX  | 0.00000  | -0.04862 | 0.00000  | 0.04954  | 0.00000  |
| 169 | H8  | PY  | 0.00000  | -0.22640 | 0.00000  | 0.04697  | 0.00000  |
| 170 | H8  | PZ  | -0.07447 | 0.00000  | -0.04301 | 0.00000  | -0.06336 |
| 171 | C10 | S   | 0.00000  | 0.00519  | 0.00000  | -0.00074 | 0.00000  |
| 172 | C10 | S   | 0.00000  | -0.01553 | 0.00000  | 0.01076  | 0.00000  |
| 173 | C10 | PX  | 0.00000  | -0.02835 | 0.00000  | -0.07265 | 0.00000  |
| 174 | C10 | PY  | 0.00000  | -0.13020 | 0.00000  | -0.08254 | 0.00000  |
| 175 | C10 | PZ  | 0.03590  | 0.00000  | 0.01700  | 0.00000  | 0.03257  |
| 176 | C10 | S   | 0.00000  | -0.12554 | 0.00000  | 0.28854  | 0.00000  |
| 177 | C10 | PX  | 0.00000  | -0.28942 | 0.00000  | -0.11912 | 0.00000  |
| 178 | C10 | PY  | 0.00000  | -0.17827 | 0.00000  | 0.04894  | 0.00000  |
| 179 | C10 | PZ  | -0.02839 | 0.00000  | -0.02068 | 0.00000  | -0.01013 |
| 180 | C10 | DXX | 0.00000  | 0.02319  | 0.00000  | 0.01361  | 0.00000  |
| 181 | C10 | DYY | 0.00000  | -0.09123 | 0.00000  | -0.04103 | 0.00000  |
| 182 | C10 | DZZ | 0.00000  | 0.05988  | 0.00000  | 0.01021  | 0.00000  |
| 183 | C10 | DXY | 0.00000  | -0.04223 | 0.00000  | -0.07777 | 0.00000  |
| 184 | C10 | DXZ | -0.25251 | 0.00000  | 0.57136  | 0.00000  | -0.07934 |
| 185 | C10 | DYZ | 0.36318  | 0.00000  | 0.31106  | 0.00000  | 0.26569  |
| 186 | H16 | S   | 0.00000  | 0.01623  | 0.00000  | -0.02735 | 0.00000  |
| 187 | H16 | S   | 0.00000  | 0.12995  | 0.00000  | 0.08198  | 0.00000  |
| 188 | H16 | PX  | 0.00000  | 0.01338  | 0.00000  | 0.00248  | 0.00000  |
| 189 | H16 | PY  | 0.00000  | 0.08642  | 0.00000  | 0.10939  | 0.00000  |
| 190 | H16 | PZ  | 0.32310  | 0.00000  | -0.38499 | 0.00000  | 0.12365  |
| 191 | H18 | S   | 0.00000  | -0.00825 | 0.00000  | 0.00264  | 0.00000  |
| 192 | H18 | S   | 0.00000  | -0.15139 | 0.00000  | -0.07729 | 0.00000  |
| 193 | H18 | PX  | 0.00000  | -0.07553 | 0.00000  | -0.07565 | 0.00000  |
| 194 | H18 | PY  | 0.00000  | -0.02156 | 0.00000  | -0.05673 | 0.00000  |
| 195 | H18 | PZ  | 0.05405  | 0.00000  | 0.56250  | 0.00000  | 0.09414  |
| 196 | C9  | S   | 0.00000  | 0.00945  | 0.00000  | 0.01074  | 0.00000  |
| 197 | C9  | S   | 0.00000  | 0.01743  | 0.00000  | -0.02689 | 0.00000  |
| 198 | C9  | PX  | 0.00000  | 0.28896  | 0.00000  | 0.02222  | 0.00000  |
| 199 | C9  | PY  | 0.00000  | 0.06940  | 0.00000  | 0.10882  | 0.00000  |
| 200 | C9  | PZ  | 0.06743  | 0.00000  | 0.06276  | 0.00000  | -0.14409 |
| 201 | C9  | S   | 0.00000  | -0.64212 | 0.00000  | -0.23756 | 0.00000  |
| 202 | C9  | PX  | 0.00000  | 0.48525  | 0.00000  | -0.07699 | 0.00000  |
| 203 | C9  | PY  | 0.00000  | 0.75740  | 0.00000  | 0.25224  | 0.00000  |
| 204 | C9  | PZ  | 0.12664  | 0.00000  | 0.14650  | 0.00000  | -0.33854 |
| 205 | C9  | DXX | 0.00000  | 0.13297  | 0.00000  | 0.21363  | 0.00000  |
| 206 | C9  | DYY | 0.00000  | -0.17627 | 0.00000  | -0.07714 | 0.00000  |
| 207 | C9  | DZZ | 0.00000  | -0.02910 | 0.00000  | -0.06668 | 0.00000  |
| 208 | C9  | DXY | 0.00000  | 0.19488  | 0.00000  | -0.19524 | 0.00000  |
| 209 | C9  | DXZ | -0.10720 | 0.00000  | -0.10646 | 0.00000  | 0.17919  |
| 210 | C9  | DYZ | 0.00579  | 0.00000  | -0.00121 | 0.00000  | -0.09657 |
| 211 | H3  | S   | 0.00000  | 0.04195  | 0.00000  | -0.02805 | 0.00000  |
| 212 | H3  | S   | 0.00000  | -0.31088 | 0.00000  | -0.11035 | 0.00000  |
| 213 | H3  | PX  | 0.00000  | -0.37549 | 0.00000  | 0.11509  | 0.00000  |
| 214 | H3  | PY  | 0.00000  | -0.06509 | 0.00000  | 0.10662  | 0.00000  |
| 215 | H3  | PZ  | -0.10582 | 0.00000  | -0.10356 | 0.00000  | 0.30184  |
| 216 | H5  | S   | -0.00499 | 0.10071  | -0.00252 | 0.02830  | -0.00733 |
| 217 | H5  | S   | 0.09514  | -0.00706 | 0.10458  | 0.11632  | -0.22112 |
| 218 | H5  | PX  | -0.10242 | -0.27172 | -0.10129 | -0.07685 | 0.17630  |

|     |    |    |          |          |          |          |          |
|-----|----|----|----------|----------|----------|----------|----------|
| 219 | H5 | PY | 0.01457  | -0.46724 | 0.01417  | -0.05640 | -0.10423 |
| 220 | H5 | PZ | 0.00390  | -0.06996 | 0.00290  | -0.00132 | -0.00312 |
| 221 | H7 | S  | 0.00499  | 0.10071  | 0.00252  | 0.02830  | 0.00733  |
| 222 | H7 | S  | -0.09514 | -0.00706 | -0.10458 | 0.11632  | 0.22112  |
| 223 | H7 | PX | 0.10242  | -0.27172 | 0.10129  | -0.07685 | -0.17630 |
| 224 | H7 | PY | -0.01457 | -0.46724 | -0.01417 | -0.05640 | 0.10423  |
| 225 | H7 | PZ | 0.00390  | 0.06996  | 0.00290  | 0.00132  | -0.00312 |

|              |          |          |          |          |          |
|--------------|----------|----------|----------|----------|----------|
| MO:          | 186      | 187      | 188      | 189      | 190      |
| Eigenvalues: | 3.04983  | 3.05511  | 3.06524  | 3.07307  | 3.11348  |
| (ev):        | 82.99007 | 83.13370 | 83.40947 | 83.62244 | 84.72227 |

|    |    |     | A        | A        | A        | A        | A        |
|----|----|-----|----------|----------|----------|----------|----------|
| 1  | H1 | S   | 0.02461  | -0.05763 | 0.02825  | 0.00000  | 0.00000  |
| 2  | H1 | S   | -0.06801 | -0.16967 | 0.04274  | 0.00000  | 0.00000  |
| 3  | H1 | PX  | -0.16996 | -0.04958 | -0.01648 | 0.00000  | 0.00000  |
| 4  | H1 | PY  | 0.37088  | -0.22089 | -0.00725 | 0.00000  | 0.00000  |
| 5  | H1 | PZ  | 0.00000  | 0.00000  | 0.00000  | 0.06853  | -0.37760 |
| 6  | C1 | S   | 0.02807  | 0.02481  | -0.02903 | 0.00000  | 0.00000  |
| 7  | C1 | S   | 0.01190  | 0.05975  | -0.15517 | 0.00000  | 0.00000  |
| 8  | C1 | PX  | 0.08451  | -0.00285 | 0.04147  | 0.00000  | 0.00000  |
| 9  | C1 | PY  | -0.11395 | -0.03502 | -0.12089 | 0.00000  | 0.00000  |
| 10 | C1 | PZ  | 0.00000  | 0.00000  | 0.00000  | -0.00103 | -0.06246 |
| 11 | C1 | S   | -1.66109 | -0.99646 | 1.37446  | 0.00000  | 0.00000  |
| 12 | C1 | PX  | 1.13983  | 0.67624  | -0.60776 | 0.00000  | 0.00000  |
| 13 | C1 | PY  | -1.64554 | 0.47776  | 0.25580  | 0.00000  | 0.00000  |
| 14 | C1 | PZ  | 0.00000  | 0.00000  | 0.00000  | 0.01674  | 0.09695  |
| 15 | C1 | DXX | 0.00777  | -0.05501 | -0.12569 | 0.00000  | 0.00000  |
| 16 | C1 | DYY | -0.24396 | -0.15170 | 0.19792  | 0.00000  | 0.00000  |
| 17 | C1 | DZZ | 0.19377  | 0.15923  | -0.15077 | 0.00000  | 0.00000  |
| 18 | C1 | DXY | 0.02343  | 0.21949  | 0.06493  | 0.00000  | 0.00000  |
| 19 | C1 | DXZ | 0.00000  | 0.00000  | 0.00000  | 0.02759  | 0.46115  |
| 20 | C1 | DYZ | 0.00000  | 0.00000  | 0.00000  | -0.37364 | 0.11814  |
| 21 | C2 | S   | 0.03214  | 0.04401  | -0.00581 | 0.00000  | 0.00000  |
| 22 | C2 | S   | 0.20701  | 0.10292  | 0.06712  | 0.00000  | 0.00000  |
| 23 | C2 | PX  | -0.05991 | 0.01529  | -0.03664 | 0.00000  | 0.00000  |
| 24 | C2 | PY  | 0.01354  | -0.16179 | 0.16649  | 0.00000  | 0.00000  |
| 25 | C2 | PZ  | 0.00000  | 0.00000  | 0.00000  | 0.02534  | 0.04513  |
| 26 | C2 | S   | -1.74125 | -1.98168 | 0.66335  | 0.00000  | 0.00000  |
| 27 | C2 | PX  | -1.39518 | -0.66688 | 0.16521  | 0.00000  | 0.00000  |
| 28 | C2 | PY  | 0.82608  | -0.52744 | 0.33885  | 0.00000  | 0.00000  |
| 29 | C2 | PZ  | 0.00000  | 0.00000  | 0.00000  | -0.02425 | -0.08025 |
| 30 | C2 | DXX | 0.02081  | 0.21234  | 0.06205  | 0.00000  | 0.00000  |
| 31 | C2 | DYY | -0.18808 | -0.50465 | 0.13564  | 0.00000  | 0.00000  |
| 32 | C2 | DZZ | 0.17191  | 0.28298  | -0.07834 | 0.00000  | 0.00000  |
| 33 | C2 | DXY | -0.01117 | -0.14704 | -0.18412 | 0.00000  | 0.00000  |
| 34 | C2 | DXZ | 0.00000  | 0.00000  | 0.00000  | 0.09946  | 0.35805  |
| 35 | C2 | DYZ | 0.00000  | 0.00000  | 0.00000  | 0.25939  | 0.16783  |
| 36 | C3 | S   | -0.00248 | -0.00351 | 0.03346  | 0.00000  | 0.00000  |
| 37 | C3 | S   | 0.04305  | 0.00525  | 0.07911  | 0.00000  | 0.00000  |
| 38 | C3 | PX  | -0.02884 | 0.07070  | 0.02066  | 0.00000  | 0.00000  |
| 39 | C3 | PY  | 0.14112  | -0.10573 | -0.04357 | 0.00000  | 0.00000  |
| 40 | C3 | PZ  | 0.00000  | 0.00000  | 0.00000  | 0.06528  | -0.00518 |
| 41 | C3 | S   | -1.15054 | -0.06232 | -1.13603 | 0.00000  | 0.00000  |

|    |    |     |          |          |          |          |          |
|----|----|-----|----------|----------|----------|----------|----------|
| 42 | C3 | PX  | -1.60069 | -1.22803 | 1.10340  | 0.00000  | 0.00000  |
| 43 | C3 | PY  | 0.28963  | 1.43577  | -0.30214 | 0.00000  | 0.00000  |
| 44 | C3 | PZ  | 0.00000  | 0.00000  | 0.00000  | -0.02165 | -0.10886 |
| 45 | C3 | DXX | 0.08556  | 0.05003  | -0.14114 | 0.00000  | 0.00000  |
| 46 | C3 | DYY | -0.08105 | 0.05493  | -0.06650 | 0.00000  | 0.00000  |
| 47 | C3 | DZZ | -0.01357 | -0.03626 | 0.19326  | 0.00000  | 0.00000  |
| 48 | C3 | DXY | 0.13323  | 0.15912  | -0.18308 | 0.00000  | 0.00000  |
| 49 | C3 | DXZ | 0.00000  | 0.00000  | 0.00000  | -0.08793 | -0.21080 |
| 50 | C3 | DYZ | 0.00000  | 0.00000  | 0.00000  | -0.48933 | 0.33871  |
| 51 | C4 | S   | -0.02370 | 0.03154  | 0.00012  | 0.00000  | 0.00000  |
| 52 | C4 | S   | 0.30033  | -0.03043 | -0.10749 | 0.00000  | 0.00000  |
| 53 | C4 | PX  | 0.09470  | 0.20865  | -0.00775 | 0.00000  | 0.00000  |
| 54 | C4 | PY  | 0.22918  | -0.31733 | -0.06606 | 0.00000  | 0.00000  |
| 55 | C4 | PZ  | 0.00000  | 0.00000  | 0.00000  | 0.01245  | 0.02027  |
| 56 | C4 | S   | 1.34063  | -0.43817 | -0.33023 | 0.00000  | 0.00000  |
| 57 | C4 | PX  | 2.47524  | -0.11155 | -1.15733 | 0.00000  | 0.00000  |
| 58 | C4 | PY  | 0.56022  | -0.25486 | -0.25557 | 0.00000  | 0.00000  |
| 59 | C4 | PZ  | 0.00000  | 0.00000  | 0.00000  | -0.00104 | -0.13115 |
| 60 | C4 | DXX | -0.00802 | 0.21527  | 0.07480  | 0.00000  | 0.00000  |
| 61 | C4 | DYY | 0.20927  | -0.33006 | -0.04783 | 0.00000  | 0.00000  |
| 62 | C4 | DZZ | -0.26419 | 0.23290  | 0.05161  | 0.00000  | 0.00000  |
| 63 | C4 | DXY | -0.32086 | -0.17033 | -0.17252 | 0.00000  | 0.00000  |
| 64 | C4 | DXZ | 0.00000  | 0.00000  | 0.00000  | 0.23896  | 0.06414  |
| 65 | C4 | DYZ | 0.00000  | 0.00000  | 0.00000  | -0.11369 | -0.47366 |
| 66 | C5 | S   | -0.01414 | -0.01792 | 0.02990  | 0.00000  | 0.00000  |
| 67 | C5 | S   | -0.14468 | 0.01344  | 0.14441  | 0.00000  | 0.00000  |
| 68 | C5 | PX  | 0.02340  | -0.09066 | 0.10475  | 0.00000  | 0.00000  |
| 69 | C5 | PY  | -0.13987 | -0.26888 | 0.01418  | 0.00000  | 0.00000  |
| 70 | C5 | PZ  | 0.00000  | 0.00000  | 0.00000  | -0.01844 | -0.02997 |
| 71 | C5 | S   | 1.61399  | 1.28942  | -1.63740 | 0.00000  | 0.00000  |
| 72 | C5 | PX  | 1.47683  | 0.06075  | -0.41987 | 0.00000  | 0.00000  |
| 73 | C5 | PY  | 0.25788  | -0.92087 | 0.23124  | 0.00000  | 0.00000  |
| 74 | C5 | PZ  | 0.00000  | 0.00000  | 0.00000  | 0.01581  | 0.08693  |
| 75 | C5 | DXX | 0.16883  | 0.10172  | 0.04185  | 0.00000  | 0.00000  |
| 76 | C5 | DYY | -0.00445 | 0.18131  | -0.23411 | 0.00000  | 0.00000  |
| 77 | C5 | DZZ | -0.07381 | -0.16138 | 0.20290  | 0.00000  | 0.00000  |
| 78 | C5 | DXY | -0.01662 | 0.11678  | -0.26150 | 0.00000  | 0.00000  |
| 79 | C5 | DXZ | 0.00000  | 0.00000  | 0.00000  | 0.06570  | -0.19574 |
| 80 | C5 | DYZ | 0.00000  | 0.00000  | 0.00000  | 0.27606  | 0.33410  |
| 81 | C6 | S   | 0.00206  | 0.02740  | -0.03400 | 0.00000  | 0.00000  |
| 82 | C6 | S   | -0.21595 | -0.17599 | 0.09616  | 0.00000  | 0.00000  |
| 83 | C6 | PX  | -0.05536 | -0.02014 | 0.16063  | 0.00000  | 0.00000  |
| 84 | C6 | PY  | 0.05830  | 0.17198  | -0.35123 | 0.00000  | 0.00000  |
| 85 | C6 | PZ  | 0.00000  | 0.00000  | 0.00000  | 0.00722  | 0.01910  |
| 86 | C6 | S   | 0.23245  | -0.41966 | 2.24589  | 0.00000  | 0.00000  |
| 87 | C6 | PX  | -1.72500 | -0.77896 | 0.75456  | 0.00000  | 0.00000  |
| 88 | C6 | PY  | 1.09928  | 0.09430  | -0.39517 | 0.00000  | 0.00000  |
| 89 | C6 | PZ  | 0.00000  | 0.00000  | 0.00000  | 0.05113  | 0.12980  |
| 90 | C6 | DXX | 0.03295  | 0.15193  | 0.06915  | 0.00000  | 0.00000  |
| 91 | C6 | DYY | -0.00623 | -0.27397 | 0.18647  | 0.00000  | 0.00000  |
| 92 | C6 | DZZ | 0.05372  | 0.24359  | -0.29637 | 0.00000  | 0.00000  |
| 93 | C6 | DXY | -0.22948 | -0.20080 | 0.14168  | 0.00000  | 0.00000  |
| 94 | C6 | DXZ | 0.00000  | 0.00000  | 0.00000  | -0.20846 | -0.02731 |
| 95 | C6 | DYZ | 0.00000  | 0.00000  | 0.00000  | -0.10152 | -0.36184 |

|     |    |     |          |          |          |          |          |
|-----|----|-----|----------|----------|----------|----------|----------|
| 96  | C7 | S   | -0.04790 | -0.00728 | 0.00321  | 0.00000  | 0.00000  |
| 97  | C7 | S   | -0.22038 | -0.04888 | 0.00320  | 0.00000  | 0.00000  |
| 98  | C7 | PX  | -0.13216 | 0.03676  | 0.04192  | 0.00000  | 0.00000  |
| 99  | C7 | PY  | 0.05248  | -0.02441 | -0.00730 | 0.00000  | 0.00000  |
| 100 | C7 | PZ  | 0.00000  | 0.00000  | 0.00000  | -0.04450 | 0.04515  |
| 101 | C7 | S   | 2.47411  | 1.21218  | -0.31117 | 0.00000  | 0.00000  |
| 102 | C7 | PX  | -1.09525 | -0.61773 | -0.03725 | 0.00000  | 0.00000  |
| 103 | C7 | PY  | 0.39425  | 1.17450  | -0.36658 | 0.00000  | 0.00000  |
| 104 | C7 | PZ  | 0.00000  | 0.00000  | 0.00000  | 0.01284  | 0.03302  |
| 105 | C7 | DXX | 0.02377  | 0.03127  | -0.01691 | 0.00000  | 0.00000  |
| 106 | C7 | DYY | 0.17668  | 0.10485  | 0.01641  | 0.00000  | 0.00000  |
| 107 | C7 | DZZ | -0.24629 | -0.02930 | -0.00290 | 0.00000  | 0.00000  |
| 108 | C7 | DXY | 0.02474  | 0.26707  | -0.04477 | 0.00000  | 0.00000  |
| 109 | C7 | DXZ | 0.00000  | 0.00000  | 0.00000  | 0.63885  | -0.24954 |
| 110 | C7 | DYZ | 0.00000  | 0.00000  | 0.00000  | -0.06660 | 0.25577  |
| 111 | O1 | S   | 0.01172  | -0.03303 | -0.03840 | 0.00000  | 0.00000  |
| 112 | O1 | S   | 0.33916  | -0.23000 | -0.43793 | 0.00000  | 0.00000  |
| 113 | O1 | PX  | 0.01398  | 0.04074  | -0.00709 | 0.00000  | 0.00000  |
| 114 | O1 | PY  | 0.02300  | -0.09240 | 0.01231  | 0.00000  | 0.00000  |
| 115 | O1 | PZ  | 0.00000  | 0.00000  | 0.00000  | 0.01683  | 0.00340  |
| 116 | O1 | S   | -1.08795 | 0.99106  | 1.48115  | 0.00000  | 0.00000  |
| 117 | O1 | PX  | 0.05752  | 0.04177  | 0.89276  | 0.00000  | 0.00000  |
| 118 | O1 | PY  | 0.72743  | -0.30972 | 0.07079  | 0.00000  | 0.00000  |
| 119 | O1 | PZ  | 0.00000  | 0.00000  | 0.00000  | -0.03607 | 0.09853  |
| 120 | O1 | DXX | 0.35148  | -0.06230 | 0.39229  | 0.00000  | 0.00000  |
| 121 | O1 | DYY | -0.40844 | 0.23941  | -0.04378 | 0.00000  | 0.00000  |
| 122 | O1 | DZZ | 0.09456  | -0.25540 | -0.44027 | 0.00000  | 0.00000  |
| 123 | O1 | DXY | -0.02159 | 0.14689  | 0.22658  | 0.00000  | 0.00000  |
| 124 | O1 | DXZ | 0.00000  | 0.00000  | 0.00000  | -0.07896 | -0.07438 |
| 125 | O1 | DYZ | 0.00000  | 0.00000  | 0.00000  | -0.09081 | -0.35774 |
| 126 | H4 | S   | 0.00217  | 0.01961  | -0.01157 | 0.00000  | 0.00000  |
| 127 | H4 | S   | 0.24148  | 0.17228  | 0.06761  | 0.00000  | 0.00000  |
| 128 | H4 | PX  | 0.05666  | 0.16967  | 0.18728  | 0.00000  | 0.00000  |
| 129 | H4 | PY  | -0.03329 | 0.17368  | 0.03567  | 0.00000  | 0.00000  |
| 130 | H4 | PZ  | 0.00000  | 0.00000  | 0.00000  | -0.12174 | -0.31742 |
| 131 | N1 | S   | -0.02287 | -0.04662 | 0.04143  | 0.00000  | 0.00000  |
| 132 | N1 | S   | -0.31827 | -0.33974 | 0.39955  | 0.00000  | 0.00000  |
| 133 | N1 | PX  | 0.03899  | 0.07379  | -0.00515 | 0.00000  | 0.00000  |
| 134 | N1 | PY  | 0.02596  | 0.17500  | -0.13874 | 0.00000  | 0.00000  |
| 135 | N1 | PZ  | 0.00000  | 0.00000  | 0.00000  | -0.01430 | -0.02621 |
| 136 | N1 | S   | 1.68648  | 2.23953  | -2.24460 | 0.00000  | 0.00000  |
| 137 | N1 | PX  | 0.82885  | 1.19929  | -0.74519 | 0.00000  | 0.00000  |
| 138 | N1 | PY  | 0.08233  | -0.38114 | -0.47734 | 0.00000  | 0.00000  |
| 139 | N1 | PZ  | 0.00000  | 0.00000  | 0.00000  | -0.06192 | -0.10480 |
| 140 | N1 | DXX | 0.23408  | 0.28413  | -0.06230 | 0.00000  | 0.00000  |
| 141 | N1 | DYY | 0.03386  | 0.17584  | -0.32902 | 0.00000  | 0.00000  |
| 142 | N1 | DZZ | -0.19472 | -0.37005 | 0.34430  | 0.00000  | 0.00000  |
| 143 | N1 | DXY | -0.08055 | -0.33816 | -0.07540 | 0.00000  | 0.00000  |
| 144 | N1 | DXZ | 0.00000  | 0.00000  | 0.00000  | -0.04851 | 0.03269  |
| 145 | N1 | DYZ | 0.00000  | 0.00000  | 0.00000  | -0.14489 | -0.29961 |
| 146 | H6 | S   | -0.05917 | -0.02137 | 0.01090  | 0.00000  | 0.00000  |
| 147 | H6 | S   | -0.25836 | -0.08523 | -0.02263 | 0.00000  | 0.00000  |
| 148 | H6 | PX  | 0.03664  | 0.13473  | -0.02563 | 0.00000  | 0.00000  |
| 149 | H6 | PY  | -0.25357 | -0.15982 | -0.29716 | 0.00000  | 0.00000  |

|     |     |     |          |          |          |          |          |
|-----|-----|-----|----------|----------|----------|----------|----------|
| 150 | H6  | PZ  | 0.00000  | 0.00000  | 0.00000  | 0.14144  | 0.31971  |
| 151 | C8  | S   | 0.06846  | 0.03396  | -0.05097 | 0.00000  | 0.00000  |
| 152 | C8  | S   | -0.05560 | -0.36532 | 0.09592  | 0.00000  | 0.00000  |
| 153 | C8  | PX  | 0.08569  | 0.14607  | -0.07326 | 0.00000  | 0.00000  |
| 154 | C8  | PY  | 0.00204  | -0.17143 | -0.00001 | 0.00000  | 0.00000  |
| 155 | C8  | PZ  | 0.00000  | 0.00000  | 0.00000  | -0.01565 | -0.00518 |
| 156 | C8  | S   | -2.91273 | -0.94441 | 1.98405  | 0.00000  | 0.00000  |
| 157 | C8  | PX  | -0.01211 | 1.62555  | -0.45817 | 0.00000  | 0.00000  |
| 158 | C8  | PY  | 0.11526  | -0.21848 | -0.81615 | 0.00000  | 0.00000  |
| 159 | C8  | PZ  | 0.00000  | 0.00000  | 0.00000  | -0.01442 | 0.01630  |
| 160 | C8  | DXX | -0.05445 | -0.40432 | -0.07811 | 0.00000  | 0.00000  |
| 161 | C8  | DYY | -0.29640 | 0.18325  | 0.24622  | 0.00000  | 0.00000  |
| 162 | C8  | DZZ | 0.48744  | 0.29165  | -0.37200 | 0.00000  | 0.00000  |
| 163 | C8  | DXY | 0.11011  | 0.04530  | -0.19987 | 0.00000  | 0.00000  |
| 164 | C8  | DXZ | 0.00000  | 0.00000  | 0.00000  | 0.03313  | 0.11228  |
| 165 | C8  | DYZ | 0.00000  | 0.00000  | 0.00000  | 0.45204  | -0.04023 |
| 166 | H8  | S   | 0.03727  | 0.02876  | 0.00501  | 0.00000  | 0.00000  |
| 167 | H8  | S   | 0.24040  | 0.11051  | 0.03140  | 0.00000  | 0.00000  |
| 168 | H8  | PX  | -0.10473 | 0.09970  | 0.03579  | 0.00000  | 0.00000  |
| 169 | H8  | PY  | -0.00670 | -0.37004 | 0.08641  | 0.00000  | 0.00000  |
| 170 | H8  | PZ  | 0.00000  | 0.00000  | 0.00000  | -0.50780 | 0.17888  |
| 171 | C10 | S   | -0.02080 | -0.01092 | 0.01616  | 0.00000  | 0.00000  |
| 172 | C10 | S   | -0.04683 | -0.01498 | 0.07040  | 0.00000  | 0.00000  |
| 173 | C10 | PX  | -0.06770 | -0.00780 | 0.03950  | 0.00000  | 0.00000  |
| 174 | C10 | PY  | 0.30477  | -0.02708 | -0.27800 | 0.00000  | 0.00000  |
| 175 | C10 | PZ  | 0.00000  | 0.00000  | 0.00000  | 0.05310  | -0.00780 |
| 176 | C10 | S   | 1.14471  | -0.03790 | -1.26441 | 0.00000  | 0.00000  |
| 177 | C10 | PX  | -0.01293 | -0.34999 | 0.36164  | 0.00000  | 0.00000  |
| 178 | C10 | PY  | 0.74790  | -0.12700 | -0.79892 | 0.00000  | 0.00000  |
| 179 | C10 | PZ  | 0.00000  | 0.00000  | 0.00000  | 0.01121  | -0.00570 |
| 180 | C10 | DXX | 0.00735  | -0.10477 | -0.08644 | 0.00000  | 0.00000  |
| 181 | C10 | DYY | 0.14041  | 0.05286  | -0.06911 | 0.00000  | 0.00000  |
| 182 | C10 | DZZ | -0.16306 | -0.06008 | 0.13172  | 0.00000  | 0.00000  |
| 183 | C10 | DXY | -0.00634 | -0.01294 | -0.04917 | 0.00000  | 0.00000  |
| 184 | C10 | DXZ | 0.00000  | 0.00000  | 0.00000  | -0.18740 | -0.06045 |
| 185 | C10 | DYZ | 0.00000  | 0.00000  | 0.00000  | 0.32647  | -0.06093 |
| 186 | H16 | S   | -0.04883 | 0.04509  | 0.01668  | 0.00000  | 0.00000  |
| 187 | H16 | S   | 0.03600  | 0.08121  | -0.18026 | 0.00000  | 0.00000  |
| 188 | H16 | PX  | -0.14986 | -0.00179 | 0.16521  | 0.00000  | 0.00000  |
| 189 | H16 | PY  | -0.16523 | 0.03198  | 0.25704  | 0.00000  | 0.00000  |
| 190 | H16 | PZ  | 0.00000  | 0.00000  | 0.00000  | 0.20033  | 0.03315  |
| 191 | H18 | S   | -0.02203 | -0.02373 | 0.09250  | 0.00000  | 0.00000  |
| 192 | H18 | S   | 0.17531  | -0.10743 | -0.13803 | 0.00000  | 0.00000  |
| 193 | H18 | PX  | 0.19158  | -0.07516 | -0.21730 | 0.00000  | 0.00000  |
| 194 | H18 | PY  | -0.03771 | 0.14229  | 0.06485  | 0.00000  | 0.00000  |
| 195 | H18 | PZ  | 0.00000  | 0.00000  | 0.00000  | 0.03943  | -0.06020 |
| 196 | C9  | S   | 0.01651  | 0.01599  | 0.03379  | 0.00000  | 0.00000  |
| 197 | C9  | S   | 0.01946  | -0.09438 | -0.36275 | 0.00000  | 0.00000  |
| 198 | C9  | PX  | -0.02835 | 0.08498  | 0.34259  | 0.00000  | 0.00000  |
| 199 | C9  | PY  | 0.03935  | 0.06692  | 0.21129  | 0.00000  | 0.00000  |
| 200 | C9  | PZ  | 0.00000  | 0.00000  | 0.00000  | 0.05065  | 0.10837  |
| 201 | C9  | S   | -0.44751 | -0.23999 | -0.87462 | 0.00000  | 0.00000  |
| 202 | C9  | PX  | -0.06127 | 0.06635  | 0.10983  | 0.00000  | 0.00000  |
| 203 | C9  | PY  | 0.44322  | -0.21460 | 0.05813  | 0.00000  | 0.00000  |

|     |    |     |          |          |          |          |          |
|-----|----|-----|----------|----------|----------|----------|----------|
| 204 | C9 | PZ  | 0.00000  | 0.00000  | 0.00000  | 0.14492  | 0.13979  |
| 205 | C9 | DXX | -0.26155 | -0.01188 | -0.41210 | 0.00000  | 0.00000  |
| 206 | C9 | DYY | -0.16181 | 0.13726  | 0.07421  | 0.00000  | 0.00000  |
| 207 | C9 | DZZ | 0.33374  | -0.05633 | 0.37831  | 0.00000  | 0.00000  |
| 208 | C9 | DXY | 0.01530  | -0.26328 | -0.35548 | 0.00000  | 0.00000  |
| 209 | C9 | DXZ | 0.00000  | 0.00000  | 0.00000  | -0.04265 | -0.05065 |
| 210 | C9 | DYZ | 0.00000  | 0.00000  | 0.00000  | 0.08725  | 0.07175  |
| 211 | H3 | S   | 0.03040  | -0.01525 | 0.01902  | 0.00000  | 0.00000  |
| 212 | H3 | S   | -0.22456 | 0.18883  | 0.11626  | 0.00000  | 0.00000  |
| 213 | H3 | PX  | 0.04827  | 0.14965  | 0.19920  | 0.00000  | 0.00000  |
| 214 | H3 | PY  | -0.02709 | 0.04293  | -0.00967 | 0.00000  | 0.00000  |
| 215 | H3 | PZ  | 0.00000  | 0.00000  | 0.00000  | -0.15009 | -0.15462 |
| 216 | H5 | S   | 0.04124  | -0.01249 | 0.00129  | 0.00484  | 0.01741  |
| 217 | H5 | S   | 0.15965  | 0.00315  | 0.17074  | 0.09152  | 0.11078  |
| 218 | H5 | PX  | 0.20780  | -0.05310 | 0.16102  | -0.04907 | -0.10140 |
| 219 | H5 | PY  | -0.18707 | 0.23856  | 0.06481  | 0.06950  | 0.06901  |
| 220 | H5 | PZ  | 0.31495  | -0.08472 | 0.17628  | -0.00137 | 0.03463  |
| 221 | H7 | S   | 0.04124  | -0.01249 | 0.00129  | -0.00484 | -0.01741 |
| 222 | H7 | S   | 0.15965  | 0.00315  | 0.17074  | -0.09152 | -0.11078 |
| 223 | H7 | PX  | 0.20780  | -0.05310 | 0.16102  | 0.04907  | 0.10140  |
| 224 | H7 | PY  | -0.18707 | 0.23856  | 0.06481  | -0.06950 | -0.06901 |
| 225 | H7 | PZ  | -0.31495 | 0.08472  | -0.17628 | -0.00137 | 0.03463  |

|              |          |          |          |          |          |
|--------------|----------|----------|----------|----------|----------|
| MO:          | 191      | 192      | 193      | 194      | 195      |
| Eigenvalues: | 3.13185  | 3.15634  | 3.19293  | 3.20217  | 3.25015  |
| (ev):        | 85.22204 | 85.88837 | 86.88420 | 87.13548 | 88.44107 |

|    |    |     |          |          |          |          |          |
|----|----|-----|----------|----------|----------|----------|----------|
|    |    |     | A        | A        | A        | A        | A        |
| 1  | H1 | S   | -0.00388 | 0.03913  | 0.04692  | 0.00000  | 0.03307  |
| 2  | H1 | S   | 0.00207  | 0.00954  | 0.25529  | 0.00000  | 0.06769  |
| 3  | H1 | PX  | -0.14110 | -0.18187 | -0.03400 | 0.00000  | 0.01418  |
| 4  | H1 | PY  | 0.15532  | 0.19337  | 0.17907  | 0.00000  | -0.34834 |
| 5  | H1 | PZ  | 0.00000  | 0.00000  | 0.00000  | -0.05135 | 0.00000  |
| 6  | C1 | S   | -0.03690 | 0.03761  | -0.08698 | 0.00000  | -0.00627 |
| 7  | C1 | S   | -0.03078 | 0.10998  | -0.34813 | 0.00000  | -0.13811 |
| 8  | C1 | PX  | -0.10937 | 0.01718  | -0.06223 | 0.00000  | -0.06394 |
| 9  | C1 | PY  | -0.15204 | -0.06112 | -0.01923 | 0.00000  | 0.06334  |
| 10 | C1 | PZ  | 0.00000  | 0.00000  | 0.00000  | -0.03358 | 0.00000  |
| 11 | C1 | S   | 1.51080  | -2.73604 | 3.31032  | 0.00000  | -0.00980 |
| 12 | C1 | PX  | -0.10765 | 1.01229  | -1.54630 | 0.00000  | -0.31360 |
| 13 | C1 | PY  | -0.75837 | -0.84329 | -0.58870 | 0.00000  | 0.54341  |
| 14 | C1 | PZ  | 0.00000  | 0.00000  | 0.00000  | 0.01530  | 0.00000  |
| 15 | C1 | DXX | 0.02943  | 0.05594  | -0.01489 | 0.00000  | -0.20744 |
| 16 | C1 | DYY | 0.11487  | -0.32986 | 0.44296  | 0.00000  | 0.23484  |
| 17 | C1 | DZZ | -0.19326 | 0.23169  | -0.47632 | 0.00000  | -0.04132 |
| 18 | C1 | DXY | -0.03671 | 0.03988  | -0.24940 | 0.00000  | 0.23042  |
| 19 | C1 | DXZ | 0.00000  | 0.00000  | 0.00000  | 0.10725  | 0.00000  |
| 20 | C1 | DYZ | 0.00000  | 0.00000  | 0.00000  | -0.08920 | 0.00000  |
| 21 | C2 | S   | 0.00039  | 0.09448  | -0.03057 | 0.00000  | 0.02582  |
| 22 | C2 | S   | -0.08404 | 0.22033  | -0.02988 | 0.00000  | 0.23508  |
| 23 | C2 | PX  | 0.05929  | -0.13713 | -0.10814 | 0.00000  | -0.01324 |
| 24 | C2 | PY  | 0.15395  | -0.09499 | 0.01294  | 0.00000  | -0.26541 |
| 25 | C2 | PZ  | 0.00000  | 0.00000  | 0.00000  | 0.00840  | 0.00000  |
| 26 | C2 | S   | 0.43055  | -3.39969 | 1.24342  | 0.00000  | -1.61824 |



|    |    |     |          |          |          |          |          |
|----|----|-----|----------|----------|----------|----------|----------|
| 27 | C2 | PX  | 0.76053  | -1.97480 | 0.18487  | 0.00000  | -0.77992 |
| 28 | C2 | PY  | 0.33434  | 0.49419  | -1.51763 | 0.00000  | -0.89103 |
| 29 | C2 | PZ  | 0.00000  | 0.00000  | 0.00000  | 0.01577  | 0.00000  |
| 30 | C2 | DXX | 0.05898  | 0.02255  | 0.03626  | 0.00000  | 0.08559  |
| 31 | C2 | DYY | 0.03955  | -0.55076 | 0.13760  | 0.00000  | -0.20730 |
| 32 | C2 | DZZ | -0.00915 | 0.55711  | -0.19932 | 0.00000  | 0.14242  |
| 33 | C2 | DXY | 0.00790  | 0.15546  | -0.15383 | 0.00000  | -0.02237 |
| 34 | C2 | DXZ | 0.00000  | 0.00000  | 0.00000  | -0.00083 | 0.00000  |
| 35 | C2 | DYZ | 0.00000  | 0.00000  | 0.00000  | 0.06571  | 0.00000  |
| 36 | C3 | S   | 0.02291  | 0.01438  | 0.13139  | 0.00000  | 0.05019  |
| 37 | C3 | S   | 0.04951  | 0.08924  | 0.57733  | 0.00000  | 0.13397  |
| 38 | C3 | PX  | 0.09938  | 0.00940  | -0.11402 | 0.00000  | -0.05314 |
| 39 | C3 | PY  | -0.08171 | 0.20705  | 0.05184  | 0.00000  | -0.11192 |
| 40 | C3 | PZ  | 0.00000  | 0.00000  | 0.00000  | 0.00640  | 0.00000  |
| 41 | C3 | S   | -0.11655 | -1.29324 | -8.82005 | 0.00000  | -3.21012 |
| 42 | C3 | PX  | -0.60884 | -0.07866 | 1.31677  | 0.00000  | 0.05385  |
| 43 | C3 | PY  | -1.37014 | 1.12372  | 1.68518  | 0.00000  | 2.57296  |
| 44 | C3 | PZ  | 0.00000  | 0.00000  | 0.00000  | -0.02917 | 0.00000  |
| 45 | C3 | DXX | 0.32958  | -0.09774 | -0.34130 | 0.00000  | -0.21488 |
| 46 | C3 | DYY | -0.33329 | 0.01131  | -0.35561 | 0.00000  | -0.05214 |
| 47 | C3 | DZZ | 0.11216  | 0.08977  | 0.67138  | 0.00000  | 0.26043  |
| 48 | C3 | DXY | -0.24497 | 0.13861  | -0.11819 | 0.00000  | 0.39007  |
| 49 | C3 | DXZ | 0.00000  | 0.00000  | 0.00000  | -0.04004 | 0.00000  |
| 50 | C3 | DYZ | 0.00000  | 0.00000  | 0.00000  | -0.03523 | 0.00000  |
| 51 | C4 | S   | -0.00432 | -0.01886 | 0.00668  | 0.00000  | 0.05101  |
| 52 | C4 | S   | -0.19448 | -0.06421 | 0.01032  | 0.00000  | 0.05557  |
| 53 | C4 | PX  | -0.05319 | 0.09037  | -0.27980 | 0.00000  | 0.14857  |
| 54 | C4 | PY  | -0.04126 | 0.01487  | 0.00573  | 0.00000  | -0.15596 |
| 55 | C4 | PZ  | 0.00000  | 0.00000  | 0.00000  | -0.00523 | 0.00000  |
| 56 | C4 | S   | 0.61891  | 0.72569  | -1.42566 | 0.00000  | -1.83065 |
| 57 | C4 | PX  | -0.78105 | 2.18853  | -1.11977 | 0.00000  | 0.07674  |
| 58 | C4 | PY  | -0.45863 | -0.59287 | 0.85108  | 0.00000  | 0.64301  |
| 59 | C4 | PZ  | 0.00000  | 0.00000  | 0.00000  | 0.04221  | 0.00000  |
| 60 | C4 | DXX | 0.27679  | 0.20268  | -0.05528 | 0.00000  | -0.24118 |
| 61 | C4 | DYY | -0.31740 | -0.07163 | -0.15893 | 0.00000  | 0.16551  |
| 62 | C4 | DZZ | 0.04690  | -0.16499 | 0.08201  | 0.00000  | 0.27032  |
| 63 | C4 | DXY | 0.10265  | -0.13637 | 0.06686  | 0.00000  | -0.07143 |
| 64 | C4 | DXZ | 0.00000  | 0.00000  | 0.00000  | 0.15623  | 0.00000  |
| 65 | C4 | DYZ | 0.00000  | 0.00000  | 0.00000  | -0.08699 | 0.00000  |
| 66 | C5 | S   | 0.02907  | -0.03246 | 0.02410  | 0.00000  | -0.05224 |
| 67 | C5 | S   | 0.04984  | -0.17407 | 0.09967  | 0.00000  | -0.00223 |
| 68 | C5 | PX  | -0.03317 | -0.15093 | 0.10367  | 0.00000  | 0.00614  |
| 69 | C5 | PY  | 0.01704  | -0.36263 | -0.03067 | 0.00000  | -0.02788 |
| 70 | C5 | PZ  | 0.00000  | 0.00000  | 0.00000  | 0.01009  | 0.00000  |
| 71 | C5 | S   | -1.48760 | 2.51261  | 0.05863  | 0.00000  | 2.38702  |
| 72 | C5 | PX  | -0.77748 | 1.34061  | -0.63073 | 0.00000  | 0.49051  |
| 73 | C5 | PY  | 0.13589  | -0.36389 | -0.46177 | 0.00000  | -0.99937 |
| 74 | C5 | PZ  | 0.00000  | 0.00000  | 0.00000  | -0.03072 | 0.00000  |
| 75 | C5 | DXX | 0.01863  | -0.02972 | -0.17731 | 0.00000  | 0.07783  |
| 76 | C5 | DYY | -0.18583 | 0.31373  | 0.02350  | 0.00000  | 0.19577  |
| 77 | C5 | DZZ | 0.16150  | -0.21156 | 0.16846  | 0.00000  | -0.28651 |
| 78 | C5 | DXY | -0.12683 | 0.19478  | -0.12767 | 0.00000  | 0.20624  |
| 79 | C5 | DXZ | 0.00000  | 0.00000  | 0.00000  | 0.05420  | 0.00000  |
| 80 | C5 | DYZ | 0.00000  | 0.00000  | 0.00000  | 0.07234  | 0.00000  |

|     |    |     |          |          |          |          |          |
|-----|----|-----|----------|----------|----------|----------|----------|
| 81  | C6 | S   | 0.01117  | -0.07728 | -0.04558 | 0.00000  | -0.02570 |
| 82  | C6 | S   | 0.23309  | 0.29062  | -0.43326 | 0.00000  | 0.12204  |
| 83  | C6 | PX  | -0.03910 | -0.11605 | 0.16041  | 0.00000  | -0.05751 |
| 84  | C6 | PY  | -0.18803 | -0.40532 | 0.01757  | 0.00000  | -0.27679 |
| 85  | C6 | PZ  | 0.00000  | 0.00000  | 0.00000  | 0.00040  | 0.00000  |
| 86  | C6 | S   | -0.42369 | 4.74689  | 2.08432  | 0.00000  | 2.48750  |
| 87  | C6 | PX  | -0.66173 | -1.02418 | 3.65630  | 0.00000  | 0.74553  |
| 88  | C6 | PY  | -0.73060 | -0.02007 | 0.17558  | 0.00000  | -0.68726 |
| 89  | C6 | PZ  | 0.00000  | 0.00000  | 0.00000  | 0.00378  | 0.00000  |
| 90  | C6 | DXX | 0.03247  | 0.10177  | 0.21641  | 0.00000  | -0.15013 |
| 91  | C6 | DYY | -0.00304 | 0.37714  | 0.11261  | 0.00000  | 0.39838  |
| 92  | C6 | DZZ | -0.04767 | -0.60063 | -0.19257 | 0.00000  | -0.21683 |
| 93  | C6 | DXY | 0.04089  | -0.27754 | 0.16924  | 0.00000  | 0.39661  |
| 94  | C6 | DXZ | 0.00000  | 0.00000  | 0.00000  | -0.03782 | 0.00000  |
| 95  | C6 | DYZ | 0.00000  | 0.00000  | 0.00000  | -0.00046 | 0.00000  |
| 96  | C7 | S   | 0.01344  | -0.03386 | -0.07912 | 0.00000  | -0.05479 |
| 97  | C7 | S   | -0.07392 | -0.09889 | -0.57189 | 0.00000  | -0.21680 |
| 98  | C7 | PX  | -0.21171 | -0.09583 | -0.17138 | 0.00000  | -0.10761 |
| 99  | C7 | PY  | -0.02236 | 0.13480  | 0.09364  | 0.00000  | 0.10887  |
| 100 | C7 | PZ  | 0.00000  | 0.00000  | 0.00000  | -0.00189 | 0.00000  |
| 101 | C7 | S   | -1.03979 | 2.12009  | 5.92529  | 0.00000  | 4.00236  |
| 102 | C7 | PX  | 0.66763  | -1.14026 | -3.37981 | 0.00000  | -1.97237 |
| 103 | C7 | PY  | 0.10793  | -0.24080 | 0.47090  | 0.00000  | 0.49776  |
| 104 | C7 | PZ  | 0.00000  | 0.00000  | 0.00000  | 0.01420  | 0.00000  |
| 105 | C7 | DXX | 0.06324  | 0.00636  | -0.00870 | 0.00000  | 0.07493  |
| 106 | C7 | DYY | -0.31107 | 0.15053  | 0.47244  | 0.00000  | 0.35446  |
| 107 | C7 | DZZ | 0.10165  | -0.17200 | -0.41696 | 0.00000  | -0.30193 |
| 108 | C7 | DXY | 0.04772  | -0.08302 | -0.02145 | 0.00000  | 0.19249  |
| 109 | C7 | DXZ | 0.00000  | 0.00000  | 0.00000  | 0.02202  | 0.00000  |
| 110 | C7 | DYZ | 0.00000  | 0.00000  | 0.00000  | 0.01265  | 0.00000  |
| 111 | O1 | S   | -0.02014 | 0.02504  | 0.01349  | 0.00000  | -0.01607 |
| 112 | O1 | S   | -0.19444 | 0.20171  | 0.07105  | 0.00000  | -0.14971 |
| 113 | O1 | PX  | -0.00072 | 0.04992  | -0.03710 | 0.00000  | 0.02115  |
| 114 | O1 | PY  | -0.07576 | -0.02794 | -0.00015 | 0.00000  | 0.05375  |
| 115 | O1 | PZ  | 0.00000  | 0.00000  | 0.00000  | -0.01339 | 0.00000  |
| 116 | O1 | S   | 0.69308  | -0.59793 | -0.50529 | 0.00000  | 0.45838  |
| 117 | O1 | PX  | 0.22000  | -0.75861 | -0.10516 | 0.00000  | 0.02097  |
| 118 | O1 | PY  | -0.12767 | -0.21932 | -0.36132 | 0.00000  | -0.13902 |
| 119 | O1 | PZ  | 0.00000  | 0.00000  | 0.00000  | -0.08233 | 0.00000  |
| 120 | O1 | DXX | 0.07799  | -0.18502 | -0.16952 | 0.00000  | -0.05687 |
| 121 | O1 | DYY | 0.09928  | 0.03027  | 0.19700  | 0.00000  | 0.08571  |
| 122 | O1 | DZZ | -0.18761 | 0.29772  | 0.04886  | 0.00000  | -0.15509 |
| 123 | O1 | DXY | 0.15011  | -0.17585 | -0.31991 | 0.00000  | 0.09372  |
| 124 | O1 | DXZ | 0.00000  | 0.00000  | 0.00000  | -0.36682 | 0.00000  |
| 125 | O1 | DYZ | 0.00000  | 0.00000  | 0.00000  | -0.09993 | 0.00000  |
| 126 | H4 | S   | 0.00003  | 0.06310  | -0.00101 | 0.00000  | -0.01962 |
| 127 | H4 | S   | -0.08620 | 0.23816  | -0.01676 | 0.00000  | 0.12695  |
| 128 | H4 | PX  | 0.19380  | 0.04529  | -0.02061 | 0.00000  | -0.10347 |
| 129 | H4 | PY  | 0.10958  | -0.04540 | -0.13727 | 0.00000  | 0.10915  |
| 130 | H4 | PZ  | 0.00000  | 0.00000  | 0.00000  | -0.00075 | 0.00000  |
| 131 | N1 | S   | 0.02647  | 0.05978  | -0.02313 | 0.00000  | 0.02624  |
| 132 | N1 | S   | 0.21536  | 0.65613  | -0.35731 | 0.00000  | 0.12988  |
| 133 | N1 | PX  | -0.06485 | -0.08086 | 0.16027  | 0.00000  | -0.05073 |
| 134 | N1 | PY  | 0.01290  | -0.16659 | -0.19146 | 0.00000  | -0.24117 |

|     |     |     |          |          |          |          |          |
|-----|-----|-----|----------|----------|----------|----------|----------|
| 135 | N1  | PZ  | 0.00000  | 0.00000  | 0.00000  | -0.00038 | 0.00000  |
| 136 | N1  | S   | -1.21382 | -3.41394 | 1.61447  | 0.00000  | -1.46792 |
| 137 | N1  | PX  | -0.04434 | -0.47269 | 0.14307  | 0.00000  | 0.01162  |
| 138 | N1  | PY  | -0.51652 | -1.12161 | 0.38847  | 0.00000  | -0.60494 |
| 139 | N1  | PZ  | 0.00000  | 0.00000  | 0.00000  | 0.00095  | 0.00000  |
| 140 | N1  | DXX | 0.10840  | -0.00002 | 0.33792  | 0.00000  | 0.15432  |
| 141 | N1  | DYY | -0.28201 | -0.62860 | -0.09450 | 0.00000  | -0.47617 |
| 142 | N1  | DZZ | 0.18736  | 0.50604  | -0.15834 | 0.00000  | 0.19281  |
| 143 | N1  | DXY | 0.18928  | -0.01198 | -0.30195 | 0.00000  | 0.21248  |
| 144 | N1  | DXZ | 0.00000  | 0.00000  | 0.00000  | 0.01398  | 0.00000  |
| 145 | N1  | DYZ | 0.00000  | 0.00000  | 0.00000  | -0.00843 | 0.00000  |
| 146 | H6  | S   | 0.09882  | -0.02019 | -0.17662 | 0.00000  | -0.09417 |
| 147 | H6  | S   | 0.30894  | -0.36644 | -0.23144 | 0.00000  | -0.28122 |
| 148 | H6  | PX  | 0.10378  | 0.06821  | -0.17022 | 0.00000  | -0.16864 |
| 149 | H6  | PY  | -0.00769 | -0.13464 | -0.05876 | 0.00000  | 0.06477  |
| 150 | H6  | PZ  | 0.00000  | 0.00000  | 0.00000  | 0.00457  | 0.00000  |
| 151 | C8  | S   | 0.01112  | -0.02310 | 0.07735  | 0.00000  | 0.01954  |
| 152 | C8  | S   | 0.09353  | 0.19628  | 0.14078  | 0.00000  | 0.21059  |
| 153 | C8  | PX  | 0.00807  | -0.13640 | 0.04943  | 0.00000  | -0.10708 |
| 154 | C8  | PY  | -0.10461 | 0.11813  | 0.00398  | 0.00000  | -0.26582 |
| 155 | C8  | PZ  | 0.00000  | 0.00000  | 0.00000  | -0.00082 | 0.00000  |
| 156 | C8  | S   | -0.32107 | 0.28527  | -3.17514 | 0.00000  | -1.51075 |
| 157 | C8  | PX  | -0.04975 | -1.14106 | -0.20840 | 0.00000  | -0.64014 |
| 158 | C8  | PY  | 1.04011  | -0.63971 | -3.22424 | 0.00000  | -0.95155 |
| 159 | C8  | PZ  | 0.00000  | 0.00000  | 0.00000  | -0.00328 | 0.00000  |
| 160 | C8  | DXX | 0.34673  | 0.06214  | -0.37615 | 0.00000  | 0.03160  |
| 161 | C8  | DYY | -0.21324 | -0.09579 | -0.05376 | 0.00000  | -0.04831 |
| 162 | C8  | DZZ | -0.00232 | -0.15514 | 0.41551  | 0.00000  | 0.01611  |
| 163 | C8  | DXY | 0.14793  | -0.21015 | 0.09009  | 0.00000  | -0.31103 |
| 164 | C8  | DXZ | 0.00000  | 0.00000  | 0.00000  | 0.01337  | 0.00000  |
| 165 | C8  | DYZ | 0.00000  | 0.00000  | 0.00000  | 0.01166  | 0.00000  |
| 166 | H8  | S   | 0.02317  | 0.04480  | 0.12877  | 0.00000  | 0.01333  |
| 167 | H8  | S   | -0.00488 | 0.28066  | 0.80107  | 0.00000  | 0.40070  |
| 168 | H8  | PX  | -0.40454 | -0.03691 | -0.09520 | 0.00000  | 0.06158  |
| 169 | H8  | PY  | -0.03334 | 0.10753  | -0.03937 | 0.00000  | -0.23238 |
| 170 | H8  | PZ  | 0.00000  | 0.00000  | 0.00000  | -0.02035 | 0.00000  |
| 171 | C10 | S   | 0.01860  | 0.00537  | -0.01077 | 0.00000  | 0.02502  |
| 172 | C10 | S   | -0.15630 | 0.11758  | -0.07112 | 0.00000  | -0.27346 |
| 173 | C10 | PX  | -0.02506 | -0.05028 | 0.07016  | 0.00000  | -0.10632 |
| 174 | C10 | PY  | 0.15404  | -0.04757 | 0.08356  | 0.00000  | -0.03439 |
| 175 | C10 | PZ  | 0.00000  | 0.00000  | 0.00000  | 0.00174  | 0.00000  |
| 176 | C10 | S   | 0.72460  | -0.45702 | -1.17341 | 0.00000  | -0.33979 |
| 177 | C10 | PX  | -0.16899 | 0.65601  | 0.61569  | 0.00000  | 0.37600  |
| 178 | C10 | PY  | 0.60939  | -0.29012 | -0.23568 | 0.00000  | 0.24106  |
| 179 | C10 | PZ  | 0.00000  | 0.00000  | 0.00000  | 0.00000  | 0.00000  |
| 180 | C10 | DXX | 0.29446  | -0.08228 | -0.13380 | 0.00000  | 0.21412  |
| 181 | C10 | DYY | -0.20485 | 0.06348  | 0.15532  | 0.00000  | -0.29450 |
| 182 | C10 | DZZ | 0.10283  | 0.02909  | -0.08242 | 0.00000  | 0.17155  |
| 183 | C10 | DXY | 0.12593  | -0.09586 | -0.02024 | 0.00000  | 0.06424  |
| 184 | C10 | DXZ | 0.00000  | 0.00000  | 0.00000  | -0.01012 | 0.00000  |
| 185 | C10 | DYZ | 0.00000  | 0.00000  | 0.00000  | 0.00471  | 0.00000  |
| 186 | H16 | S   | -0.02791 | -0.06094 | -0.03952 | 0.00000  | -0.03339 |
| 187 | H16 | S   | 0.17602  | -0.26715 | -0.22025 | 0.00000  | 0.08126  |
| 188 | H16 | PX  | -0.20784 | 0.09827  | 0.01306  | 0.00000  | -0.28214 |

|     |     |     |          |          |          |          |          |
|-----|-----|-----|----------|----------|----------|----------|----------|
| 189 | H16 | PY  | -0.32952 | 0.19265  | -0.01276 | 0.00000  | -0.10340 |
| 190 | H16 | PZ  | 0.00000  | 0.00000  | 0.00000  | 0.00747  | 0.00000  |
| 191 | H18 | S   | -0.03835 | 0.12136  | 0.12650  | 0.00000  | 0.08769  |
| 192 | H18 | S   | 0.15722  | 0.00653  | 0.22834  | 0.00000  | 0.21988  |
| 193 | H18 | PX  | 0.33126  | -0.12211 | 0.07962  | 0.00000  | 0.28985  |
| 194 | H18 | PY  | -0.21829 | -0.01891 | 0.16399  | 0.00000  | -0.18881 |
| 195 | H18 | PZ  | 0.00000  | 0.00000  | 0.00000  | -0.00352 | 0.00000  |
| 196 | C9  | S   | 0.00367  | -0.01685 | -0.02792 | 0.00000  | 0.01080  |
| 197 | C9  | S   | -0.21206 | 0.25981  | 0.03818  | 0.00000  | -0.00810 |
| 198 | C9  | PX  | 0.15378  | -0.23977 | -0.14782 | 0.00000  | 0.02904  |
| 199 | C9  | PY  | 0.06568  | -0.10711 | -0.02266 | 0.00000  | 0.04226  |
| 200 | C9  | PZ  | 0.00000  | 0.00000  | 0.00000  | 0.03652  | 0.00000  |
| 201 | C9  | S   | -0.03907 | 0.51227  | 0.59341  | 0.00000  | -0.20527 |
| 202 | C9  | PX  | 0.12141  | -0.13933 | -0.12283 | 0.00000  | 0.00868  |
| 203 | C9  | PY  | -0.39551 | -0.03387 | -0.25037 | 0.00000  | 0.13856  |
| 204 | C9  | PZ  | 0.00000  | 0.00000  | 0.00000  | -0.10230 | 0.00000  |
| 205 | C9  | DXX | 0.04112  | 0.31198  | 0.27027  | 0.00000  | -0.17441 |
| 206 | C9  | DYY | 0.09637  | -0.07767 | -0.03450 | 0.00000  | 0.05604  |
| 207 | C9  | DZZ | -0.09674 | -0.27815 | -0.21334 | 0.00000  | 0.14414  |
| 208 | C9  | DXY | -0.29270 | 0.03157  | 0.01970  | 0.00000  | 0.10429  |
| 209 | C9  | DXZ | 0.00000  | 0.00000  | 0.00000  | -0.31192 | 0.00000  |
| 210 | C9  | DYZ | 0.00000  | 0.00000  | 0.00000  | -0.85972 | 0.00000  |
| 211 | H3  | S   | 0.00911  | -0.02821 | -0.03098 | 0.00000  | -0.00946 |
| 212 | H3  | S   | 0.26715  | -0.06933 | 0.03629  | 0.00000  | -0.05052 |
| 213 | H3  | PX  | 0.17211  | 0.02645  | 0.03489  | 0.00000  | -0.11202 |
| 214 | H3  | PY  | -0.01206 | 0.04859  | 0.06990  | 0.00000  | 0.01002  |
| 215 | H3  | PZ  | 0.00000  | 0.00000  | 0.00000  | 0.59188  | 0.00000  |
| 216 | H5  | S   | -0.04433 | -0.00687 | -0.03944 | 0.02484  | 0.01649  |
| 217 | H5  | S   | -0.04201 | -0.06439 | -0.08057 | -0.06015 | 0.04392  |
| 218 | H5  | PX  | -0.10663 | -0.11940 | -0.07851 | -0.19444 | 0.08970  |
| 219 | H5  | PY  | 0.18667  | 0.02605  | 0.01488  | -0.46070 | -0.04081 |
| 220 | H5  | PZ  | -0.14138 | -0.11652 | -0.11325 | 0.05273  | 0.09787  |
| 221 | H7  | S   | -0.04433 | -0.00687 | -0.03944 | -0.02484 | 0.01649  |
| 222 | H7  | S   | -0.04201 | -0.06439 | -0.08057 | 0.06015  | 0.04392  |
| 223 | H7  | PX  | -0.10663 | -0.11940 | -0.07851 | 0.19444  | 0.08970  |
| 224 | H7  | PY  | 0.18667  | 0.02605  | 0.01488  | 0.46070  | -0.04081 |
| 225 | H7  | PZ  | 0.14138  | 0.11652  | 0.11325  | 0.05273  | -0.09787 |

|              |          |          |          |          |          |
|--------------|----------|----------|----------|----------|----------|
| MO:          | 196      | 197      | 198      | 199      | 200      |
| Eigenvalues: | 3.30396  | 3.34005  | 3.35844  | 3.43095  | 3.45749  |
| (ev):        | 89.90539 | 90.88745 | 91.38780 | 93.36103 | 94.08322 |

|    |    |    |          |          |          |          |          |
|----|----|----|----------|----------|----------|----------|----------|
|    |    |    | A        | A        | A        | A        | A        |
| 1  | H1 | S  | -0.14225 | 0.01944  | -0.01062 | -0.10608 | 0.18676  |
| 2  | H1 | S  | -0.50753 | 0.06258  | 0.03420  | -0.18966 | 0.31540  |
| 3  | H1 | PX | 0.38430  | -0.11079 | -0.06560 | 0.13371  | -0.40927 |
| 4  | H1 | PY | 0.07788  | -0.07082 | 0.11540  | 0.18505  | -0.06589 |
| 5  | H1 | PZ | 0.00000  | 0.00000  | 0.00000  | 0.00000  | 0.00000  |
| 6  | C1 | S  | -0.02773 | -0.00881 | 0.02010  | -0.00407 | 0.02745  |
| 7  | C1 | S  | 0.20121  | -0.11992 | -0.05674 | 0.05459  | -0.37374 |
| 8  | C1 | PX | 0.28877  | -0.14105 | 0.09197  | 0.10689  | -0.01752 |
| 9  | C1 | PY | -0.10761 | -0.05109 | -0.02154 | 0.21541  | -0.19185 |
| 10 | C1 | PZ | 0.00000  | 0.00000  | 0.00000  | 0.00000  | 0.00000  |
| 11 | C1 | S  | 0.12890  | 1.34093  | -0.28940 | 0.40862  | -0.34332 |

|    |    |     |          |          |          |          |          |
|----|----|-----|----------|----------|----------|----------|----------|
| 12 | C1 | PX  | 1.02338  | -0.00813 | 0.28880  | 0.27916  | -0.18930 |
| 13 | C1 | PY  | -0.90841 | -1.15185 | -0.49948 | -0.12334 | 0.00489  |
| 14 | C1 | PZ  | 0.00000  | 0.00000  | 0.00000  | 0.00000  | 0.00000  |
| 15 | C1 | DXX | -0.18470 | -0.04583 | 0.08182  | 0.18464  | -0.11945 |
| 16 | C1 | DYY | 0.29562  | 0.13361  | -0.22364 | -0.20375 | -0.15669 |
| 17 | C1 | DZZ | -0.17172 | -0.01385 | 0.13106  | -0.03684 | 0.22409  |
| 18 | C1 | DXY | 0.13677  | 0.13499  | -0.03839 | -0.27078 | 0.03780  |
| 19 | C1 | DXZ | 0.00000  | 0.00000  | 0.00000  | 0.00000  | 0.00000  |
| 20 | C1 | DYZ | 0.00000  | 0.00000  | 0.00000  | 0.00000  | 0.00000  |
| 21 | C2 | S   | 0.00170  | -0.03718 | -0.03117 | -0.02120 | -0.02427 |
| 22 | C2 | S   | -0.23685 | -0.05394 | 0.06836  | 0.15211  | 0.30111  |
| 23 | C2 | PX  | -0.04356 | -0.18634 | -0.10003 | -0.00618 | 0.02783  |
| 24 | C2 | PY  | -0.10570 | -0.05462 | 0.03790  | 0.04770  | 0.13781  |
| 25 | C2 | PZ  | 0.00000  | 0.00000  | 0.00000  | 0.00000  | 0.00000  |
| 26 | C2 | S   | 0.75069  | 1.07542  | 0.76943  | 0.18703  | 0.20713  |
| 27 | C2 | PX  | 0.37277  | 0.25950  | -0.03966 | 0.55460  | 0.08805  |
| 28 | C2 | PY  | 1.86914  | 0.72854  | 1.04182  | 0.07907  | -0.30036 |
| 29 | C2 | PZ  | 0.00000  | 0.00000  | 0.00000  | 0.00000  | 0.00000  |
| 30 | C2 | DXX | 0.10726  | -0.10728 | -0.01841 | -0.08759 | 0.03912  |
| 31 | C2 | DYY | -0.18845 | 0.21793  | 0.14567  | 0.20653  | 0.18447  |
| 32 | C2 | DZZ | 0.05041  | -0.21365 | -0.20098 | -0.13041 | -0.19307 |
| 33 | C2 | DXY | -0.19490 | -0.03231 | -0.12217 | 0.24147  | 0.02063  |
| 34 | C2 | DXZ | 0.00000  | 0.00000  | 0.00000  | 0.00000  | 0.00000  |
| 35 | C2 | DYZ | 0.00000  | 0.00000  | 0.00000  | 0.00000  | 0.00000  |
| 36 | C3 | S   | -0.03998 | -0.00779 | -0.03910 | -0.06488 | -0.01843 |
| 37 | C3 | S   | -0.18788 | 0.04899  | 0.04783  | 0.14006  | 0.08412  |
| 38 | C3 | PX  | 0.13665  | -0.08421 | 0.03495  | 0.17867  | 0.10363  |
| 39 | C3 | PY  | -0.34531 | -0.11065 | 0.00862  | -0.13058 | 0.00395  |
| 40 | C3 | PZ  | 0.00000  | 0.00000  | 0.00000  | 0.00000  | 0.00000  |
| 41 | C3 | S   | 3.84317  | -0.19678 | 2.17177  | 2.31791  | 0.75772  |
| 42 | C3 | PX  | -2.09938 | -1.56112 | -0.50079 | -1.40423 | 0.60200  |
| 43 | C3 | PY  | -2.37624 | -1.30951 | -1.48753 | -0.88078 | -0.76650 |
| 44 | C3 | PZ  | 0.00000  | 0.00000  | 0.00000  | 0.00000  | 0.00000  |
| 45 | C3 | DXX | 0.40259  | 0.39535  | -0.09072 | -0.23542 | -0.18650 |
| 46 | C3 | DYY | -0.07540 | -0.27453 | 0.23118  | 0.48306  | 0.24019  |
| 47 | C3 | DZZ | -0.19458 | -0.04863 | -0.17685 | -0.33436 | -0.12472 |
| 48 | C3 | DXY | -0.49737 | 0.24052  | -0.02058 | -0.17331 | 0.03000  |
| 49 | C3 | DXZ | 0.00000  | 0.00000  | 0.00000  | 0.00000  | 0.00000  |
| 50 | C3 | DYZ | 0.00000  | 0.00000  | 0.00000  | 0.00000  | 0.00000  |
| 51 | C4 | S   | 0.00076  | -0.01380 | -0.05249 | -0.01283 | -0.03765 |
| 52 | C4 | S   | -0.19111 | 0.35641  | 0.20510  | 0.09964  | -0.36328 |
| 53 | C4 | PX  | -0.00458 | -0.05070 | -0.05801 | -0.01243 | 0.05982  |
| 54 | C4 | PY  | -0.26900 | 0.08817  | 0.09456  | 0.30209  | -0.45878 |
| 55 | C4 | PZ  | 0.00000  | 0.00000  | 0.00000  | 0.00000  | 0.00000  |
| 56 | C4 | S   | 0.14686  | 0.32343  | 1.10964  | 0.58890  | 0.39663  |
| 57 | C4 | PX  | 1.07922  | 0.12446  | 0.35017  | -0.09675 | -0.20206 |
| 58 | C4 | PY  | -1.10239 | 0.47571  | -0.21797 | 0.33418  | -0.85339 |
| 59 | C4 | PZ  | 0.00000  | 0.00000  | 0.00000  | 0.00000  | 0.00000  |
| 60 | C4 | DXX | -0.08772 | 0.04977  | 0.14780  | -0.23092 | 0.44433  |
| 61 | C4 | DYY | 0.06112  | -0.01409 | -0.08835 | 0.17056  | -0.49713 |
| 62 | C4 | DZZ | 0.06992  | -0.11451 | -0.32104 | -0.09202 | -0.14197 |
| 63 | C4 | DXY | -0.22263 | 0.19950  | -0.12087 | 0.01268  | -0.40521 |
| 64 | C4 | DXZ | 0.00000  | 0.00000  | 0.00000  | 0.00000  | 0.00000  |
| 65 | C4 | DYZ | 0.00000  | 0.00000  | 0.00000  | 0.00000  | 0.00000  |

|     |    |     |          |          |          |          |          |
|-----|----|-----|----------|----------|----------|----------|----------|
| 66  | C5 | S   | -0.01102 | 0.02132  | 0.04749  | -0.01827 | 0.06359  |
| 67  | C5 | S   | 0.09847  | -0.06215 | -0.11729 | -0.13099 | -0.26710 |
| 68  | C5 | PX  | 0.04204  | 0.05648  | 0.07656  | 0.06925  | 0.09649  |
| 69  | C5 | PY  | -0.12501 | 0.00035  | -0.09609 | 0.19325  | 0.01433  |
| 70  | C5 | PZ  | 0.00000  | 0.00000  | 0.00000  | 0.00000  | 0.00000  |
| 71  | C5 | S   | -1.05358 | -1.00513 | -1.51959 | 0.00323  | -0.75147 |
| 72  | C5 | PX  | 0.80413  | 0.23339  | 0.29055  | -0.10974 | -0.43686 |
| 73  | C5 | PY  | 1.17786  | 0.45802  | 0.69141  | -0.18168 | -0.15754 |
| 74  | C5 | PZ  | 0.00000  | 0.00000  | 0.00000  | 0.00000  | 0.00000  |
| 75  | C5 | DXX | -0.13818 | -0.30561 | -0.13026 | 0.20736  | 0.24954  |
| 76  | C5 | DYY | 0.22899  | 0.11599  | -0.03890 | -0.24648 | -0.35128 |
| 77  | C5 | DZZ | -0.09387 | 0.14395  | 0.28086  | -0.06575 | 0.37886  |
| 78  | C5 | DXY | 0.05375  | -0.08961 | -0.15754 | 0.01798  | -0.15030 |
| 79  | C5 | DXZ | 0.00000  | 0.00000  | 0.00000  | 0.00000  | 0.00000  |
| 80  | C5 | DYZ | 0.00000  | 0.00000  | 0.00000  | 0.00000  | 0.00000  |
| 81  | C6 | S   | 0.02665  | 0.02650  | 0.02485  | 0.01157  | 0.01666  |
| 82  | C6 | S   | 0.56473  | -0.00678 | 0.09544  | 0.65635  | -0.09658 |
| 83  | C6 | PX  | 0.04813  | -0.09744 | 0.15041  | -0.04508 | 0.01665  |
| 84  | C6 | PY  | -0.31262 | -0.03882 | -0.07241 | -0.37335 | 0.04125  |
| 85  | C6 | PZ  | 0.00000  | 0.00000  | 0.00000  | 0.00000  | 0.00000  |
| 86  | C6 | S   | -1.00395 | -1.67050 | -0.95616 | -0.81205 | -0.54640 |
| 87  | C6 | PX  | -3.02262 | -1.06017 | -1.26323 | -1.34403 | 0.24054  |
| 88  | C6 | PY  | -1.59435 | -0.23783 | 0.33223  | -1.67518 | 0.33891  |
| 89  | C6 | PZ  | 0.00000  | 0.00000  | 0.00000  | 0.00000  | 0.00000  |
| 90  | C6 | DXX | -0.18825 | -0.46403 | -0.15809 | -0.37133 | 0.00600  |
| 91  | C6 | DYY | 0.08908  | 0.30564  | 0.04678  | 0.51037  | 0.00619  |
| 92  | C6 | DZZ | -0.00456 | 0.12975  | 0.14065  | -0.09865 | 0.10945  |
| 93  | C6 | DXY | -0.26598 | -0.22087 | -0.08222 | 0.19708  | 0.35888  |
| 94  | C6 | DXZ | 0.00000  | 0.00000  | 0.00000  | 0.00000  | 0.00000  |
| 95  | C6 | DYZ | 0.00000  | 0.00000  | 0.00000  | 0.00000  | 0.00000  |
| 96  | C7 | S   | 0.05182  | -0.01986 | 0.00281  | 0.02755  | 0.00994  |
| 97  | C7 | S   | 0.12463  | -0.00281 | 0.31039  | 0.08279  | 0.03832  |
| 98  | C7 | PX  | 0.04330  | -0.29204 | 0.35662  | 0.33553  | 0.05447  |
| 99  | C7 | PY  | -0.26300 | -0.07779 | -0.16427 | -0.19040 | -0.07745 |
| 100 | C7 | PZ  | 0.00000  | 0.00000  | 0.00000  | 0.00000  | 0.00000  |
| 101 | C7 | S   | -3.74140 | 0.22525  | -2.01191 | -1.81835 | -1.02117 |
| 102 | C7 | PX  | 2.16096  | 0.15012  | 1.47045  | 1.24057  | 0.42871  |
| 103 | C7 | PY  | 0.62249  | 0.45881  | -0.15446 | 0.76519  | -0.47846 |
| 104 | C7 | PZ  | 0.00000  | 0.00000  | 0.00000  | 0.00000  | 0.00000  |
| 105 | C7 | DXX | -0.00557 | 0.05286  | 0.10108  | 0.08966  | 0.02133  |
| 106 | C7 | DYY | -0.41204 | 0.04847  | -0.02134 | -0.24872 | -0.07117 |
| 107 | C7 | DZZ | 0.28602  | -0.09853 | -0.03721 | 0.13024  | 0.04906  |
| 108 | C7 | DXY | 0.36409  | 0.34899  | 0.16735  | 0.45275  | 0.23066  |
| 109 | C7 | DXZ | 0.00000  | 0.00000  | 0.00000  | 0.00000  | 0.00000  |
| 110 | C7 | DYZ | 0.00000  | 0.00000  | 0.00000  | 0.00000  | 0.00000  |
| 111 | O1 | S   | 0.00467  | -0.01136 | 0.02154  | 0.01988  | 0.01281  |
| 112 | O1 | S   | -0.06431 | 0.17978  | 0.22771  | 0.05013  | -0.09109 |
| 113 | O1 | PX  | 0.02891  | -0.03610 | -0.02140 | -0.03189 | 0.08591  |
| 114 | O1 | PY  | 0.06739  | -0.04745 | -0.03898 | 0.01618  | 0.00107  |
| 115 | O1 | PZ  | 0.00000  | 0.00000  | 0.00000  | 0.00000  | 0.00000  |
| 116 | O1 | S   | 0.33518  | -0.45389 | -0.74357 | -0.47011 | 0.26255  |
| 117 | O1 | PX  | -0.43854 | 0.15477  | -0.08514 | 0.21665  | -0.51868 |
| 118 | O1 | PY  | -0.65054 | 0.45029  | 0.16038  | 0.42949  | -1.02059 |
| 119 | O1 | PZ  | 0.00000  | 0.00000  | 0.00000  | 0.00000  | 0.00000  |

|     |     |     |          |          |          |          |          |
|-----|-----|-----|----------|----------|----------|----------|----------|
| 120 | O1  | DXX | -0.37439 | 0.09341  | 0.02369  | 0.29053  | -0.43735 |
| 121 | O1  | DYY | 0.36160  | -0.23211 | -0.11547 | -0.29832 | 0.71567  |
| 122 | O1  | DZZ | 0.04205  | -0.00299 | 0.21253  | 0.09377  | 0.00432  |
| 123 | O1  | DXY | -0.22500 | 0.12455  | -0.21309 | -0.03371 | -0.26249 |
| 124 | O1  | DXZ | 0.00000  | 0.00000  | 0.00000  | 0.00000  | 0.00000  |
| 125 | O1  | DYZ | 0.00000  | 0.00000  | 0.00000  | 0.00000  | 0.00000  |
| 126 | H4  | S   | 0.03829  | 0.08122  | 0.11529  | -0.00592 | 0.09736  |
| 127 | H4  | S   | 0.02520  | 0.08082  | 0.14739  | 0.02129  | 0.14045  |
| 128 | H4  | PX  | -0.15363 | -0.06094 | 0.10583  | 0.09296  | 0.36068  |
| 129 | H4  | PY  | -0.23953 | -0.28938 | -0.27538 | 0.10281  | -0.00029 |
| 130 | H4  | PZ  | 0.00000  | 0.00000  | 0.00000  | 0.00000  | 0.00000  |
| 131 | N1  | S   | 0.01412  | 0.01067  | -0.00343 | 0.00386  | 0.00579  |
| 132 | N1  | S   | 0.21860  | -0.27698 | 0.09305  | -0.06108 | -0.09196 |
| 133 | N1  | PX  | -0.06909 | -0.14820 | -0.01722 | -0.02370 | -0.01201 |
| 134 | N1  | PY  | 0.02361  | -0.05620 | 0.00796  | -0.19440 | 0.01243  |
| 135 | N1  | PZ  | 0.00000  | 0.00000  | 0.00000  | 0.00000  | 0.00000  |
| 136 | N1  | S   | -1.23713 | 0.49140  | -0.10836 | -0.43587 | 0.23862  |
| 137 | N1  | PX  | 0.63897  | 0.16554  | -0.16017 | 0.96664  | -0.07708 |
| 138 | N1  | PY  | -1.53342 | 0.13652  | -0.04786 | -1.53177 | 0.32685  |
| 139 | N1  | PZ  | 0.00000  | 0.00000  | 0.00000  | 0.00000  | 0.00000  |
| 140 | N1  | DXX | 0.23447  | -0.11770 | -0.22724 | 0.58220  | 0.00065  |
| 141 | N1  | DYY | -0.38450 | 0.09802  | 0.10468  | -0.75496 | 0.02637  |
| 142 | N1  | DZZ | 0.09331  | 0.00673  | 0.02549  | 0.06188  | 0.00781  |
| 143 | N1  | DXY | -0.28568 | -0.03255 | -0.23615 | -0.10810 | 0.31465  |
| 144 | N1  | DXZ | 0.00000  | 0.00000  | 0.00000  | 0.00000  | 0.00000  |
| 145 | N1  | DYZ | 0.00000  | 0.00000  | 0.00000  | 0.00000  | 0.00000  |
| 146 | H6  | S   | 0.09856  | -0.03690 | -0.03229 | -0.02236 | -0.08378 |
| 147 | H6  | S   | 0.29640  | -0.05682 | -0.07999 | 0.14768  | -0.10163 |
| 148 | H6  | PX  | 0.14122  | -0.21527 | -0.11777 | -0.22407 | -0.19369 |
| 149 | H6  | PY  | -0.22825 | -0.06671 | -0.20585 | 0.20690  | -0.01339 |
| 150 | H6  | PZ  | 0.00000  | 0.00000  | 0.00000  | 0.00000  | 0.00000  |
| 151 | C8  | S   | -0.01405 | 0.03382  | -0.03601 | 0.03132  | 0.01564  |
| 152 | C8  | S   | -0.32214 | -0.28164 | 0.15152  | -0.46027 | -0.13565 |
| 153 | C8  | PX  | 0.09876  | -0.15801 | 0.05044  | 0.10698  | -0.09819 |
| 154 | C8  | PY  | -0.14035 | 0.15572  | -0.39700 | -0.03459 | 0.08911  |
| 155 | C8  | PZ  | 0.00000  | 0.00000  | 0.00000  | 0.00000  | 0.00000  |
| 156 | C8  | S   | 1.71287  | -0.13974 | 1.30611  | 0.35530  | 0.00696  |
| 157 | C8  | PX  | 1.66252  | 0.31957  | 0.17777  | 1.71494  | -0.24931 |
| 158 | C8  | PY  | 1.47201  | -0.21700 | 1.04683  | 0.57322  | 0.19427  |
| 159 | C8  | PZ  | 0.00000  | 0.00000  | 0.00000  | 0.00000  | 0.00000  |
| 160 | C8  | DXX | -0.03972 | 0.34668  | -0.27227 | -0.00067 | 0.27022  |
| 161 | C8  | DYY | 0.14215  | -0.46003 | 0.49473  | -0.04611 | -0.26923 |
| 162 | C8  | DZZ | -0.05071 | 0.23190  | -0.25018 | 0.22160  | 0.09791  |
| 163 | C8  | DXY | 0.04430  | -0.38832 | -0.42191 | 0.31492  | 0.02732  |
| 164 | C8  | DXZ | 0.00000  | 0.00000  | 0.00000  | 0.00000  | 0.00000  |
| 165 | C8  | DYZ | 0.00000  | 0.00000  | 0.00000  | 0.00000  | 0.00000  |
| 166 | H8  | S   | -0.00496 | 0.03702  | -0.24166 | -0.14641 | -0.00489 |
| 167 | H8  | S   | -0.40924 | 0.02926  | -0.62598 | -0.38421 | -0.11544 |
| 168 | H8  | PX  | -0.20407 | -0.24100 | 0.51682  | 0.21453  | 0.01470  |
| 169 | H8  | PY  | -0.20877 | -0.21891 | -0.08099 | -0.37454 | -0.09836 |
| 170 | H8  | PZ  | 0.00000  | 0.00000  | 0.00000  | 0.00000  | 0.00000  |
| 171 | C10 | S   | 0.01320  | -0.02624 | 0.04174  | -0.00580 | -0.01662 |
| 172 | C10 | S   | 0.01090  | 0.19869  | -0.39494 | 0.17076  | 0.17558  |
| 173 | C10 | PX  | -0.03756 | -0.41575 | -0.11225 | 0.12495  | -0.04118 |

|     |     |     |          |          |          |          |          |
|-----|-----|-----|----------|----------|----------|----------|----------|
| 174 | C10 | PY  | -0.06801 | 0.04571  | -0.24172 | 0.07250  | 0.06869  |
| 175 | C10 | PZ  | 0.00000  | 0.00000  | 0.00000  | 0.00000  | 0.00000  |
| 176 | C10 | S   | 0.17891  | 0.11352  | -0.08847 | 0.10802  | 0.33219  |
| 177 | C10 | PX  | -0.64817 | -0.34974 | -0.36179 | -0.40534 | -0.04308 |
| 178 | C10 | PY  | -0.18907 | -0.12738 | 0.11358  | -0.20966 | 0.03565  |
| 179 | C10 | PZ  | 0.00000  | 0.00000  | 0.00000  | 0.00000  | 0.00000  |
| 180 | C10 | DXX | 0.04980  | -0.15264 | 0.19982  | 0.00035  | -0.01112 |
| 181 | C10 | DYY | -0.09340 | 0.33590  | -0.58190 | 0.13538  | 0.18362  |
| 182 | C10 | DZZ | 0.08443  | -0.20954 | 0.34097  | -0.07820 | -0.14181 |
| 183 | C10 | DXY | 0.02330  | -0.13884 | 0.19604  | -0.09258 | -0.04132 |
| 184 | C10 | DXZ | 0.00000  | 0.00000  | 0.00000  | 0.00000  | 0.00000  |
| 185 | C10 | DYZ | 0.00000  | 0.00000  | 0.00000  | 0.00000  | 0.00000  |
| 186 | H16 | S   | 0.08350  | 0.10957  | 0.16308  | -0.06085 | -0.03735 |
| 187 | H16 | S   | 0.19825  | 0.19488  | 0.37533  | 0.00103  | -0.05032 |
| 188 | H16 | PX  | -0.02666 | -0.12658 | -0.45191 | 0.24326  | 0.11521  |
| 189 | H16 | PY  | -0.00481 | 0.33087  | -0.05649 | -0.05803 | 0.02789  |
| 190 | H16 | PZ  | 0.00000  | 0.00000  | 0.00000  | 0.00000  | 0.00000  |
| 191 | H18 | S   | -0.06296 | -0.17090 | 0.00395  | -0.00774 | -0.08627 |
| 192 | H18 | S   | -0.28037 | -0.35519 | 0.00809  | -0.20626 | -0.08941 |
| 193 | H18 | PX  | -0.04828 | -0.36107 | 0.28043  | -0.06969 | -0.14749 |
| 194 | H18 | PY  | -0.03474 | -0.26136 | -0.13139 | 0.08430  | -0.07711 |
| 195 | H18 | PZ  | 0.00000  | 0.00000  | 0.00000  | 0.00000  | 0.00000  |
| 196 | C9  | S   | -0.02681 | 0.00281  | -0.01217 | 0.01844  | -0.04368 |
| 197 | C9  | S   | 0.22951  | -0.16023 | 0.06812  | -0.16036 | 0.37647  |
| 198 | C9  | PX  | -0.18115 | 0.06271  | -0.10934 | 0.01594  | -0.17839 |
| 199 | C9  | PY  | -0.00685 | 0.01309  | -0.03163 | 0.00467  | 0.03265  |
| 200 | C9  | PZ  | 0.00000  | 0.00000  | 0.00000  | 0.00000  | 0.00000  |
| 201 | C9  | S   | 0.50918  | -0.07527 | 0.23325  | -0.29584 | 0.92058  |
| 202 | C9  | PX  | -0.21703 | 0.14154  | -0.04753 | 0.07719  | -0.30348 |
| 203 | C9  | PY  | -0.00386 | -0.29267 | -0.05751 | -0.00126 | 0.13734  |
| 204 | C9  | PZ  | 0.00000  | 0.00000  | 0.00000  | 0.00000  | 0.00000  |
| 205 | C9  | DXX | -0.05128 | 0.01938  | 0.21356  | 0.14736  | -0.09106 |
| 206 | C9  | DYY | 0.00531  | 0.01308  | -0.06867 | -0.06072 | 0.11426  |
| 207 | C9  | DZZ | 0.04471  | -0.01819 | -0.16402 | -0.08021 | -0.02192 |
| 208 | C9  | DXY | 0.27644  | -0.09911 | -0.07007 | -0.14351 | 0.19287  |
| 209 | C9  | DXZ | 0.00000  | 0.00000  | 0.00000  | 0.00000  | 0.00000  |
| 210 | C9  | DYZ | 0.00000  | 0.00000  | 0.00000  | 0.00000  | 0.00000  |
| 211 | H3  | S   | -0.06556 | 0.05540  | -0.01385 | 0.05993  | -0.22580 |
| 212 | H3  | S   | -0.13643 | 0.19656  | -0.01174 | 0.07286  | -0.29099 |
| 213 | H3  | PX  | -0.19091 | 0.08719  | 0.09661  | 0.13654  | -0.20600 |
| 214 | H3  | PY  | 0.13289  | -0.06882 | 0.03588  | -0.09709 | 0.32954  |
| 215 | H3  | PZ  | 0.00000  | 0.00000  | 0.00000  | 0.00000  | 0.00000  |
| 216 | H5  | S   | -0.05527 | -0.02720 | -0.00106 | 0.05259  | -0.06167 |
| 217 | H5  | S   | 0.02908  | -0.04699 | -0.04288 | 0.03421  | -0.08369 |
| 218 | H5  | PX  | 0.13535  | -0.04767 | -0.07912 | -0.11949 | 0.15549  |
| 219 | H5  | PY  | -0.13516 | 0.09337  | 0.03126  | 0.05955  | -0.12571 |
| 220 | H5  | PZ  | 0.04483  | -0.04346 | -0.06851 | 0.02485  | -0.05603 |
| 221 | H7  | S   | -0.05527 | -0.02720 | -0.00106 | 0.05259  | -0.06167 |
| 222 | H7  | S   | 0.02908  | -0.04699 | -0.04288 | 0.03421  | -0.08369 |
| 223 | H7  | PX  | 0.13535  | -0.04767 | -0.07912 | -0.11949 | 0.15549  |
| 224 | H7  | PY  | -0.13516 | 0.09337  | 0.03126  | 0.05955  | -0.12571 |
| 225 | H7  | PZ  | -0.04483 | 0.04346  | 0.06851  | -0.02485 | 0.05603  |

MO:

201

202

203

204

205



|              |          |          |          |          |           |
|--------------|----------|----------|----------|----------|-----------|
| Eigenvalues: | 3.52337  | 3.56160  | 3.57691  | 3.66981  | 3.72630   |
| (ev):        | 95.87591 | 96.91612 | 97.33263 | 99.86077 | 101.39790 |

|    |    | A   | A        | A        | A        | A        |          |
|----|----|-----|----------|----------|----------|----------|----------|
| 1  | H1 | S   | -0.04330 | 0.22972  | -0.12081 | 0.07766  | 0.01208  |
| 2  | H1 | S   | -0.04892 | 0.17382  | 0.06527  | 0.04686  | -0.02133 |
| 3  | H1 | PX  | 0.03345  | -0.48068 | 0.17057  | -0.11620 | 0.02010  |
| 4  | H1 | PY  | 0.28089  | -0.03319 | 0.05683  | -0.01976 | -0.18129 |
| 5  | H1 | PZ  | 0.00000  | 0.00000  | 0.00000  | 0.00000  | 0.00000  |
| 6  | C1 | S   | -0.02783 | 0.01993  | -0.00250 | -0.00094 | 0.00516  |
| 7  | C1 | S   | 0.12237  | -0.01099 | 0.07455  | -0.02621 | -0.10345 |
| 8  | C1 | PX  | -0.06844 | -0.43907 | 0.08044  | -0.04071 | 0.10548  |
| 9  | C1 | PY  | 0.10772  | -0.02461 | 0.07589  | -0.06373 | -0.12162 |
| 10 | C1 | PZ  | 0.00000  | 0.00000  | 0.00000  | 0.00000  | 0.00000  |
| 11 | C1 | S   | 0.21798  | -0.28041 | -0.00538 | -0.05516 | 0.18004  |
| 12 | C1 | PX  | -0.19315 | 0.34797  | -0.12836 | -0.00760 | -0.03680 |
| 13 | C1 | PY  | 0.10923  | -0.64942 | 0.07576  | -0.01609 | 0.34903  |
| 14 | C1 | PZ  | 0.00000  | 0.00000  | 0.00000  | 0.00000  | 0.00000  |
| 15 | C1 | DXX | 0.21334  | -0.01351 | 0.12247  | -0.07204 | -0.20603 |
| 16 | C1 | DYY | -0.09252 | -0.01939 | -0.04721 | 0.00402  | 0.12190  |
| 17 | C1 | DZZ | -0.16691 | 0.11194  | -0.04326 | 0.01162  | 0.05378  |
| 18 | C1 | DXY | -0.34679 | -0.25386 | 0.01800  | -0.05104 | 0.24815  |
| 19 | C1 | DXZ | 0.00000  | 0.00000  | 0.00000  | 0.00000  | 0.00000  |
| 20 | C1 | DYZ | 0.00000  | 0.00000  | 0.00000  | 0.00000  | 0.00000  |
| 21 | C2 | S   | 0.03757  | -0.01840 | 0.00687  | -0.02469 | -0.00260 |
| 22 | C2 | S   | 0.00708  | 0.05198  | -0.02142 | 0.31002  | 0.02111  |
| 23 | C2 | PX  | 0.09138  | -0.19026 | -0.00157 | -0.53312 | 0.02921  |
| 24 | C2 | PY  | 0.31312  | -0.05451 | 0.00696  | -0.02880 | 0.18859  |
| 25 | C2 | PZ  | 0.00000  | 0.00000  | 0.00000  | 0.00000  | 0.00000  |
| 26 | C2 | S   | -0.82855 | 0.00948  | -0.29814 | 0.46780  | 0.19785  |
| 27 | C2 | PX  | -0.22269 | 0.09300  | -0.05542 | -0.18562 | 0.32766  |
| 28 | C2 | PY  | -1.33167 | 0.55636  | -0.26845 | 0.12978  | -0.05588 |
| 29 | C2 | PZ  | 0.00000  | 0.00000  | 0.00000  | 0.00000  | 0.00000  |
| 30 | C2 | DXX | -0.37435 | -0.09137 | -0.02114 | 0.48035  | -0.17527 |
| 31 | C2 | DYY | 0.22956  | 0.04339  | 0.02069  | -0.18586 | 0.24494  |
| 32 | C2 | DZZ | 0.18962  | -0.11140 | 0.03559  | -0.19847 | -0.02977 |
| 33 | C2 | DXY | 0.46416  | 0.14964  | 0.06521  | 0.36348  | 0.24760  |
| 34 | C2 | DXZ | 0.00000  | 0.00000  | 0.00000  | 0.00000  | 0.00000  |
| 35 | C2 | DYZ | 0.00000  | 0.00000  | 0.00000  | 0.00000  | 0.00000  |
| 36 | C3 | S   | 0.04138  | -0.03755 | 0.00318  | -0.02117 | -0.02119 |
| 37 | C3 | S   | 0.49682  | -0.17578 | 0.04073  | -0.03274 | -0.15879 |
| 38 | C3 | PX  | 0.07199  | -0.21220 | 0.01623  | 0.01842  | -0.13103 |
| 39 | C3 | PY  | -0.05722 | 0.14774  | -0.02031 | -0.03902 | -0.04589 |
| 40 | C3 | PZ  | 0.00000  | 0.00000  | 0.00000  | 0.00000  | 0.00000  |
| 41 | C3 | S   | -3.93029 | 2.12391  | -0.78744 | 0.93063  | 1.15737  |
| 42 | C3 | PX  | 1.01872  | -1.71149 | -0.06786 | -0.17098 | -0.22691 |
| 43 | C3 | PY  | 1.60404  | -1.24683 | 0.80794  | -0.35110 | -0.24459 |
| 44 | C3 | PZ  | 0.00000  | 0.00000  | 0.00000  | 0.00000  | 0.00000  |
| 45 | C3 | DXX | -0.18164 | 0.34661  | -0.03317 | 0.06061  | 0.15575  |
| 46 | C3 | DYY | 0.07402  | -0.25248 | 0.01874  | -0.02194 | -0.10610 |
| 47 | C3 | DZZ | 0.14634  | -0.12148 | 0.00992  | -0.10152 | -0.08814 |
| 48 | C3 | DXY | -0.31001 | 0.29485  | 0.00411  | -0.12906 | 0.17675  |
| 49 | C3 | DXZ | 0.00000  | 0.00000  | 0.00000  | 0.00000  | 0.00000  |
| 50 | C3 | DYZ | 0.00000  | 0.00000  | 0.00000  | 0.00000  | 0.00000  |

|     |    |     |          |          |          |          |          |
|-----|----|-----|----------|----------|----------|----------|----------|
| 51  | C4 | S   | 0.04210  | 0.02001  | 0.00824  | -0.01580 | -0.02340 |
| 52  | C4 | S   | -0.47560 | -0.39648 | 0.21990  | 0.06096  | 0.21246  |
| 53  | C4 | PX  | -0.08959 | -0.15226 | 0.01045  | -0.05688 | 0.19821  |
| 54  | C4 | PY  | -0.10540 | -0.16898 | 0.23514  | -0.02474 | 0.01191  |
| 55  | C4 | PZ  | 0.00000  | 0.00000  | 0.00000  | 0.00000  | 0.00000  |
| 56  | C4 | S   | -0.76218 | 0.07911  | 0.12966  | 0.29282  | 0.35252  |
| 57  | C4 | PX  | -0.05911 | 0.55566  | 0.10248  | -0.08438 | -0.53524 |
| 58  | C4 | PY  | 0.00715  | -0.56913 | 1.02540  | -0.13796 | 0.15796  |
| 59  | C4 | PZ  | 0.00000  | 0.00000  | 0.00000  | 0.00000  | 0.00000  |
| 60  | C4 | DXX | 0.08397  | 0.27424  | -0.17810 | 0.07595  | -0.15672 |
| 61  | C4 | DYY | -0.22739 | -0.26249 | 0.24361  | -0.11232 | 0.13295  |
| 62  | C4 | DZZ | 0.30375  | 0.16929  | -0.01684 | -0.05713 | -0.15891 |
| 63  | C4 | DXY | 0.22416  | 0.46639  | 0.02809  | -0.05668 | -0.36013 |
| 64  | C4 | DXZ | 0.00000  | 0.00000  | 0.00000  | 0.00000  | 0.00000  |
| 65  | C4 | DYZ | 0.00000  | 0.00000  | 0.00000  | 0.00000  | 0.00000  |
| 66  | C5 | S   | -0.02493 | 0.00871  | -0.02843 | -0.02934 | 0.00694  |
| 67  | C5 | S   | -0.12959 | -0.17323 | 0.07780  | 0.38183  | -0.09475 |
| 68  | C5 | PX  | -0.00287 | -0.06244 | -0.00917 | -0.46541 | 0.16997  |
| 69  | C5 | PY  | 0.23847  | 0.00958  | 0.09251  | 0.42146  | 0.12011  |
| 70  | C5 | PZ  | 0.00000  | 0.00000  | 0.00000  | 0.00000  | 0.00000  |
| 71  | C5 | S   | 1.64690  | -0.11980 | 0.71506  | -0.01255 | -0.52998 |
| 72  | C5 | PX  | -0.36408 | 0.19356  | 0.11338  | -0.34813 | -0.27857 |
| 73  | C5 | PY  | -0.74542 | 0.16376  | -0.34142 | 0.44268  | -0.13798 |
| 74  | C5 | PZ  | 0.00000  | 0.00000  | 0.00000  | 0.00000  | 0.00000  |
| 75  | C5 | DXX | 0.22826  | -0.25146 | 0.05380  | 0.19384  | 0.26588  |
| 76  | C5 | DYY | -0.32672 | 0.15302  | -0.03769 | 0.08071  | -0.35964 |
| 77  | C5 | DZZ | -0.08849 | 0.07307  | -0.14448 | -0.23430 | 0.06613  |
| 78  | C5 | DXY | 0.05602  | 0.04203  | -0.02114 | -0.63341 | 0.06324  |
| 79  | C5 | DXZ | 0.00000  | 0.00000  | 0.00000  | 0.00000  | 0.00000  |
| 80  | C5 | DYZ | 0.00000  | 0.00000  | 0.00000  | 0.00000  | 0.00000  |
| 81  | C6 | S   | -0.06717 | 0.03664  | -0.00936 | 0.00213  | 0.00724  |
| 82  | C6 | S   | -0.06331 | 0.45840  | -0.01763 | 0.10348  | 0.11921  |
| 83  | C6 | PX  | -0.04213 | -0.13794 | -0.01701 | -0.04036 | -0.12819 |
| 84  | C6 | PY  | 0.28394  | -0.34399 | 0.03413  | 0.07136  | -0.03186 |
| 85  | C6 | PZ  | 0.00000  | 0.00000  | 0.00000  | 0.00000  | 0.00000  |
| 86  | C6 | S   | 1.67318  | -1.16995 | 0.25425  | -0.26772 | -0.61482 |
| 87  | C6 | PX  | 2.32562  | -1.99389 | 0.35934  | -0.33953 | -0.20961 |
| 88  | C6 | PY  | 0.36907  | -0.93803 | -0.04974 | -0.02825 | -0.32726 |
| 89  | C6 | PZ  | 0.00000  | 0.00000  | 0.00000  | 0.00000  | 0.00000  |
| 90  | C6 | DXX | 0.18889  | -0.49842 | 0.02654  | 0.08225  | -0.21428 |
| 91  | C6 | DYY | -0.09350 | 0.48283  | -0.01191 | -0.14066 | 0.18624  |
| 92  | C6 | DZZ | -0.25724 | 0.06403  | -0.03760 | 0.02771  | 0.00424  |
| 93  | C6 | DXY | -0.46909 | -0.33222 | -0.04701 | -0.18543 | -0.17918 |
| 94  | C6 | DXZ | 0.00000  | 0.00000  | 0.00000  | 0.00000  | 0.00000  |
| 95  | C6 | DYZ | 0.00000  | 0.00000  | 0.00000  | 0.00000  | 0.00000  |
| 96  | C7 | S   | -0.03317 | 0.01105  | -0.01032 | 0.01652  | 0.05935  |
| 97  | C7 | S   | -0.26032 | 0.23308  | -0.07486 | 0.01827  | -0.12055 |
| 98  | C7 | PX  | 0.02184  | 0.06698  | -0.00593 | -0.03744 | -0.25661 |
| 99  | C7 | PY  | -0.17920 | 0.17567  | 0.00385  | -0.04819 | 0.11060  |
| 100 | C7 | PZ  | 0.00000  | 0.00000  | 0.00000  | 0.00000  | 0.00000  |
| 101 | C7 | S   | 2.99782  | -1.54857 | 1.09591  | -0.92887 | -1.42964 |
| 102 | C7 | PX  | -1.68849 | 1.11861  | -0.53213 | 0.48753  | 0.35177  |
| 103 | C7 | PY  | -0.05911 | 0.69608  | 0.13648  | -0.00696 | 0.33282  |
| 104 | C7 | PZ  | 0.00000  | 0.00000  | 0.00000  | 0.00000  | 0.00000  |

|     |    |     |          |          |          |          |          |
|-----|----|-----|----------|----------|----------|----------|----------|
| 105 | C7 | DXX | 0.09461  | 0.02385  | 0.01901  | -0.06640 | -0.21728 |
| 106 | C7 | DYY | 0.06197  | -0.00965 | 0.03464  | -0.04205 | 0.17075  |
| 107 | C7 | DZZ | -0.10835 | -0.00472 | -0.03611 | 0.09314  | 0.29821  |
| 108 | C7 | DXY | 0.35948  | -0.40767 | 0.03382  | 0.03402  | -0.10839 |
| 109 | C7 | DXZ | 0.00000  | 0.00000  | 0.00000  | 0.00000  | 0.00000  |
| 110 | C7 | DYZ | 0.00000  | 0.00000  | 0.00000  | 0.00000  | 0.00000  |
| 111 | O1 | S   | -0.02087 | -0.03397 | -0.00930 | 0.01001  | 0.03029  |
| 112 | O1 | S   | -0.22877 | -0.18839 | 0.25334  | 0.06897  | 0.05540  |
| 113 | O1 | PX  | 0.03799  | 0.05226  | 0.09661  | -0.00299 | -0.00773 |
| 114 | O1 | PY  | 0.01042  | -0.00155 | 0.03900  | -0.03608 | 0.01767  |
| 115 | O1 | PZ  | 0.00000  | 0.00000  | 0.00000  | 0.00000  | 0.00000  |
| 116 | O1 | S   | 0.75921  | 0.91385  | -0.65507 | -0.22716 | -0.50142 |
| 117 | O1 | PX  | -0.15213 | -0.20550 | 0.32177  | -0.05606 | 0.12727  |
| 118 | O1 | PY  | -0.45387 | -0.37647 | 0.74708  | -0.02298 | 0.12663  |
| 119 | O1 | PZ  | 0.00000  | 0.00000  | 0.00000  | 0.00000  | 0.00000  |
| 120 | O1 | DXX | -0.16382 | -0.18159 | 0.38862  | -0.04282 | 0.11972  |
| 121 | O1 | DYY | 0.34434  | 0.29402  | -0.40886 | 0.05924  | -0.06391 |
| 122 | O1 | DZZ | -0.22499 | -0.23688 | -0.03124 | 0.06777  | 0.15228  |
| 123 | O1 | DXY | 0.23075  | 0.40851  | 0.11948  | -0.10724 | -0.22264 |
| 124 | O1 | DXZ | 0.00000  | 0.00000  | 0.00000  | 0.00000  | 0.00000  |
| 125 | O1 | DYZ | 0.00000  | 0.00000  | 0.00000  | 0.00000  | 0.00000  |
| 126 | H4 | S   | -0.05327 | 0.07282  | -0.06516 | -0.66170 | 0.09229  |
| 127 | H4 | S   | -0.10378 | 0.04702  | 0.00659  | -0.52909 | 0.05767  |
| 128 | H4 | PX  | 0.12152  | 0.00427  | -0.07847 | -0.67502 | 0.21443  |
| 129 | H4 | PY  | 0.22825  | -0.13826 | 0.11849  | 0.77471  | 0.00415  |
| 130 | H4 | PZ  | 0.00000  | 0.00000  | 0.00000  | 0.00000  | 0.00000  |
| 131 | N1 | S   | -0.00554 | -0.01430 | -0.00009 | -0.00733 | 0.01633  |
| 132 | N1 | S   | 0.05886  | -0.02327 | -0.01197 | 0.15799  | -0.13916 |
| 133 | N1 | PX  | -0.04687 | -0.00887 | -0.00354 | -0.01653 | -0.04352 |
| 134 | N1 | PY  | 0.03635  | -0.16052 | -0.00094 | 0.09070  | -0.04052 |
| 135 | N1 | PZ  | 0.00000  | 0.00000  | 0.00000  | 0.00000  | 0.00000  |
| 136 | N1 | S   | 0.20124  | -0.01286 | 0.03132  | -0.20249 | 0.00393  |
| 137 | N1 | PX  | -0.52594 | 0.80459  | -0.02538 | -0.08928 | 0.13212  |
| 138 | N1 | PY  | 0.48560  | -1.15778 | 0.06273  | -0.07989 | -0.15471 |
| 139 | N1 | PZ  | 0.00000  | 0.00000  | 0.00000  | 0.00000  | 0.00000  |
| 140 | N1 | DXX | -0.29822 | 0.35953  | -0.01556 | -0.12279 | 0.12554  |
| 141 | N1 | DYY | 0.22896  | -0.49884 | 0.02583  | 0.04630  | -0.02287 |
| 142 | N1 | DZZ | 0.01283  | -0.02196 | -0.00099 | -0.01281 | 0.05035  |
| 143 | N1 | DXY | -0.26914 | -0.42790 | -0.01697 | -0.04627 | -0.11714 |
| 144 | N1 | DXZ | 0.00000  | 0.00000  | 0.00000  | 0.00000  | 0.00000  |
| 145 | N1 | DYZ | 0.00000  | 0.00000  | 0.00000  | 0.00000  | 0.00000  |
| 146 | H6 | S   | 0.09616  | -0.05448 | -0.00051 | -0.54816 | 0.04483  |
| 147 | H6 | S   | -0.05241 | -0.02089 | -0.00256 | -0.36532 | 0.09953  |
| 148 | H6 | PX  | 0.15231  | -0.22623 | 0.00157  | -0.83240 | -0.02283 |
| 149 | H6 | PY  | 0.40813  | 0.04393  | 0.05207  | -0.30872 | 0.17700  |
| 150 | H6 | PZ  | 0.00000  | 0.00000  | 0.00000  | 0.00000  | 0.00000  |
| 151 | C8 | S   | 0.01591  | -0.00818 | 0.00426  | -0.01745 | -0.05743 |
| 152 | C8 | S   | 0.18458  | -0.11796 | 0.02822  | 0.00926  | -0.13032 |
| 153 | C8 | PX  | -0.17195 | 0.29686  | -0.02368 | -0.02587 | 0.02702  |
| 154 | C8 | PY  | -0.01400 | -0.05992 | 0.00031  | -0.00079 | 0.16730  |
| 155 | C8 | PZ  | 0.00000  | 0.00000  | 0.00000  | 0.00000  | 0.00000  |
| 156 | C8 | S   | -0.71764 | 0.43475  | -0.32034 | 0.60693  | 1.61330  |
| 157 | C8 | PX  | -0.50617 | 1.31217  | -0.10968 | 0.12368  | 0.69720  |
| 158 | C8 | PY  | -1.73495 | 0.76284  | -0.35358 | 0.40581  | -0.21013 |

|     |     |     |          |          |          |          |          |
|-----|-----|-----|----------|----------|----------|----------|----------|
| 159 | C8  | PZ  | 0.00000  | 0.00000  | 0.00000  | 0.00000  | 0.00000  |
| 160 | C8  | DXX | -0.06496 | -0.30181 | -0.00941 | -0.01876 | -0.07688 |
| 161 | C8  | DYY | -0.05225 | 0.31352  | -0.01803 | 0.03678  | -0.03658 |
| 162 | C8  | DZZ | 0.04092  | 0.00037  | 0.01458  | -0.08174 | -0.25933 |
| 163 | C8  | DXY | -0.40112 | 0.27148  | -0.04179 | -0.03044 | 0.11192  |
| 164 | C8  | DXZ | 0.00000  | 0.00000  | 0.00000  | 0.00000  | 0.00000  |
| 165 | C8  | DYZ | 0.00000  | 0.00000  | 0.00000  | 0.00000  | 0.00000  |
| 166 | H8  | S   | 0.01393  | -0.11391 | 0.00234  | 0.05100  | 0.28861  |
| 167 | H8  | S   | 0.35156  | -0.33190 | 0.11356  | -0.08210 | 0.12656  |
| 168 | H8  | PX  | 0.06404  | 0.15573  | 0.01094  | -0.10225 | -0.40664 |
| 169 | H8  | PY  | -0.13781 | 0.10698  | -0.02612 | 0.00982  | 0.05165  |
| 170 | H8  | PZ  | 0.00000  | 0.00000  | 0.00000  | 0.00000  | 0.00000  |
| 171 | C10 | S   | 0.01404  | 0.01150  | 0.00117  | 0.00795  | 0.09051  |
| 172 | C10 | S   | -0.13216 | -0.05780 | -0.02370 | -0.04316 | -0.50768 |
| 173 | C10 | PX  | -0.32827 | 0.25320  | -0.03935 | -0.05511 | 0.02391  |
| 174 | C10 | PY  | -0.06217 | 0.02034  | 0.00092  | -0.00381 | 0.43752  |
| 175 | C10 | PZ  | 0.00000  | 0.00000  | 0.00000  | 0.00000  | 0.00000  |
| 176 | C10 | S   | -1.08140 | 0.09360  | -0.15098 | 0.01850  | -1.52800 |
| 177 | C10 | PX  | 0.15496  | -0.21926 | 0.07397  | -0.12325 | -0.09125 |
| 178 | C10 | PY  | -0.30492 | -0.03788 | -0.01248 | -0.01434 | -0.28136 |
| 179 | C10 | PZ  | 0.00000  | 0.00000  | 0.00000  | 0.00000  | 0.00000  |
| 180 | C10 | DXX | -0.15078 | 0.03255  | -0.02480 | -0.04691 | -0.58250 |
| 181 | C10 | DYY | 0.02528  | -0.15359 | 0.01632  | -0.00159 | 0.27791  |
| 182 | C10 | DZZ | 0.09754  | 0.09839  | 0.00853  | 0.05495  | 0.55602  |
| 183 | C10 | DXY | 0.11620  | -0.11116 | 0.01072  | 0.04084  | -0.31767 |
| 184 | C10 | DXZ | 0.00000  | 0.00000  | 0.00000  | 0.00000  | 0.00000  |
| 185 | C10 | DYZ | 0.00000  | 0.00000  | 0.00000  | 0.00000  | 0.00000  |
| 186 | H16 | S   | 0.22888  | -0.07290 | 0.01925  | 0.07883  | 0.41186  |
| 187 | H16 | S   | 0.14295  | 0.00278  | 0.00464  | 0.07424  | 0.30491  |
| 188 | H16 | PX  | -0.39604 | 0.14283  | -0.04816 | -0.09689 | -0.49024 |
| 189 | H16 | PY  | 0.20695  | -0.10658 | 0.02377  | 0.03975  | 0.35215  |
| 190 | H16 | PZ  | 0.00000  | 0.00000  | 0.00000  | 0.00000  | 0.00000  |
| 191 | H18 | S   | -0.03187 | 0.15554  | 0.00569  | -0.01224 | 0.50952  |
| 192 | H18 | S   | -0.02822 | 0.00979  | 0.02620  | -0.03704 | 0.27717  |
| 193 | H18 | PX  | -0.07806 | 0.19885  | -0.00318 | -0.00928 | 0.45334  |
| 194 | H18 | PY  | -0.12108 | 0.22346  | -0.00765 | 0.00743  | 0.66980  |
| 195 | H18 | PZ  | 0.00000  | 0.00000  | 0.00000  | 0.00000  | 0.00000  |
| 196 | C9  | S   | 0.01042  | -0.00752 | -0.09889 | -0.00163 | -0.00135 |
| 197 | C9  | S   | -0.02925 | 0.06745  | 0.76442  | -0.00249 | 0.00138  |
| 198 | C9  | PX  | 0.03747  | 0.18516  | 0.55603  | -0.09595 | -0.13456 |
| 199 | C9  | PY  | -0.02325 | -0.03751 | 0.16306  | 0.00664  | 0.16491  |
| 200 | C9  | PZ  | 0.00000  | 0.00000  | 0.00000  | 0.00000  | 0.00000  |
| 201 | C9  | S   | -0.05268 | 0.14581  | 0.55897  | 0.10142  | 0.03702  |
| 202 | C9  | PX  | -0.04814 | 0.04195  | 0.40811  | -0.06858 | -0.07105 |
| 203 | C9  | PY  | 0.07221  | -0.02163 | 0.21225  | -0.01767 | 0.11522  |
| 204 | C9  | PZ  | 0.00000  | 0.00000  | 0.00000  | 0.00000  | 0.00000  |
| 205 | C9  | DXX | -0.19540 | -0.31544 | -0.42529 | 0.05183  | 0.06903  |
| 206 | C9  | DYY | 0.07056  | 0.05824  | -0.12481 | 0.03014  | 0.16963  |
| 207 | C9  | DZZ | 0.12344  | 0.24658  | 0.33190  | -0.08737 | -0.21190 |
| 208 | C9  | DXY | 0.15352  | 0.08758  | -0.58926 | 0.04786  | -0.06405 |
| 209 | C9  | DXZ | 0.00000  | 0.00000  | 0.00000  | 0.00000  | 0.00000  |
| 210 | C9  | DYZ | 0.00000  | 0.00000  | 0.00000  | 0.00000  | 0.00000  |
| 211 | H3  | S   | 0.01256  | -0.00159 | -0.26969 | -0.02369 | -0.16659 |
| 212 | H3  | S   | -0.01871 | -0.00113 | -0.30931 | -0.01801 | -0.11839 |

|     |    |    |          |          |          |          |          |
|-----|----|----|----------|----------|----------|----------|----------|
| 213 | H3 | PX | -0.12717 | -0.14497 | 0.01125  | 0.00095  | 0.01594  |
| 214 | H3 | PY | -0.06379 | -0.01722 | 0.57637  | 0.02743  | 0.23671  |
| 215 | H3 | PZ | 0.00000  | 0.00000  | 0.00000  | 0.00000  | 0.00000  |
| 216 | H5 | S  | 0.01601  | -0.08832 | -0.37629 | 0.03258  | 0.08354  |
| 217 | H5 | S  | 0.04728  | -0.06395 | -0.37822 | 0.01138  | 0.04182  |
| 218 | H5 | PX | 0.07257  | 0.17062  | 0.38718  | -0.03792 | -0.09289 |
| 219 | H5 | PY | -0.04884 | -0.06392 | -0.16235 | 0.01463  | 0.03369  |
| 220 | H5 | PZ | 0.09180  | -0.06026 | -0.64438 | 0.04193  | 0.06972  |
| 221 | H7 | S  | 0.01601  | -0.08832 | -0.37629 | 0.03258  | 0.08354  |
| 222 | H7 | S  | 0.04728  | -0.06395 | -0.37822 | 0.01138  | 0.04182  |
| 223 | H7 | PX | 0.07257  | 0.17062  | 0.38718  | -0.03792 | -0.09289 |
| 224 | H7 | PY | -0.04884 | -0.06392 | -0.16235 | 0.01463  | 0.03369  |
| 225 | H7 | PZ | -0.09180 | 0.06026  | 0.64438  | -0.04193 | -0.06972 |

|              |           |           |           |           |           |
|--------------|-----------|-----------|-----------|-----------|-----------|
| MO:          | 206       | 207       | 208       | 209       | 210       |
| Eigenvalues: | 3.78192   | 3.79244   | 3.84127   | 3.87761   | 3.98970   |
| (ev):        | 102.91138 | 103.19748 | 104.52633 | 105.51517 | 108.56519 |

|    |    | A   | A        | A        | A        | A        |          |
|----|----|-----|----------|----------|----------|----------|----------|
| 1  | H1 | S   | 0.04729  | 0.00000  | -0.02568 | 0.75223  | 0.03842  |
| 2  | H1 | S   | -0.04375 | 0.00000  | -0.09396 | 0.56436  | -0.07560 |
| 3  | H1 | PX  | -0.11510 | 0.00000  | 0.09291  | -0.93001 | -0.09735 |
| 4  | H1 | PY  | 0.17433  | 0.00000  | -0.12664 | -0.36155 | 0.09844  |
| 5  | H1 | PZ  | 0.00000  | -0.02276 | 0.00000  | 0.00000  | 0.00000  |
| 6  | C1 | S   | 0.01696  | 0.00000  | 0.00546  | 0.07856  | 0.03767  |
| 7  | C1 | S   | 0.02584  | 0.00000  | -0.11078 | -0.43974 | -0.06232 |
| 8  | C1 | PX  | -0.13033 | 0.00000  | 0.16523  | -0.52787 | -0.08681 |
| 9  | C1 | PY  | 0.17030  | 0.00000  | -0.10709 | -0.18431 | 0.19475  |
| 10 | C1 | PZ  | 0.00000  | 0.00379  | 0.00000  | 0.00000  | 0.00000  |
| 11 | C1 | S   | -0.33049 | 0.00000  | 0.02727  | -1.12745 | -0.84565 |
| 12 | C1 | PX  | 0.36053  | 0.00000  | 0.05360  | -0.40697 | 0.45924  |
| 13 | C1 | PY  | -0.66705 | 0.00000  | -0.09691 | 0.09465  | -0.01387 |
| 14 | C1 | PZ  | 0.00000  | -0.04473 | 0.00000  | 0.00000  | 0.00000  |
| 15 | C1 | DXX | 0.20063  | 0.00000  | -0.13141 | -0.69217 | 0.16165  |
| 16 | C1 | DYY | -0.16759 | 0.00000  | 0.10680  | 0.54936  | -0.11371 |
| 17 | C1 | DZZ | 0.06140  | 0.00000  | 0.04931  | 0.46015  | 0.14254  |
| 18 | C1 | DXY | -0.34421 | 0.00000  | 0.27869  | -0.48140 | -0.29480 |
| 19 | C1 | DXZ | 0.00000  | 0.04292  | 0.00000  | 0.00000  | 0.00000  |
| 20 | C1 | DYZ | 0.00000  | -0.01082 | 0.00000  | 0.00000  | 0.00000  |
| 21 | C2 | S   | -0.00684 | 0.00000  | -0.00633 | 0.05563  | -0.02176 |
| 22 | C2 | S   | -0.04420 | 0.00000  | 0.12274  | -0.28990 | 0.07525  |
| 23 | C2 | PX  | 0.03191  | 0.00000  | -0.07862 | 0.32636  | -0.06188 |
| 24 | C2 | PY  | -0.26505 | 0.00000  | 0.13592  | 0.14317  | -0.10915 |
| 25 | C2 | PZ  | 0.00000  | 0.00026  | 0.00000  | 0.00000  | 0.00000  |
| 26 | C2 | S   | 0.14879  | 0.00000  | -0.00216 | -0.56304 | 0.20857  |
| 27 | C2 | PX  | -0.00750 | 0.00000  | -0.05279 | 0.10474  | -0.04568 |
| 28 | C2 | PY  | 0.61787  | 0.00000  | -0.24098 | 0.09170  | 0.39210  |
| 29 | C2 | PZ  | 0.00000  | 0.01353  | 0.00000  | 0.00000  | 0.00000  |
| 30 | C2 | DXX | 0.23746  | 0.00000  | -0.03464 | -0.36873 | 0.09393  |
| 31 | C2 | DYY | -0.27822 | 0.00000  | 0.09376  | 0.33859  | -0.15664 |
| 32 | C2 | DZZ | -0.00211 | 0.00000  | -0.06809 | 0.32257  | -0.09577 |
| 33 | C2 | DXY | -0.37756 | 0.00000  | 0.30035  | -0.31467 | 0.02762  |
| 34 | C2 | DXZ | 0.00000  | 0.00306  | 0.00000  | 0.00000  | 0.00000  |
| 35 | C2 | DYZ | 0.00000  | 0.00694  | 0.00000  | 0.00000  | 0.00000  |

|    |    |     |          |          |          |          |          |
|----|----|-----|----------|----------|----------|----------|----------|
| 36 | C3 | S   | -0.03406 | 0.00000  | 0.00829  | -0.03121 | -0.08786 |
| 37 | C3 | S   | 0.09045  | 0.00000  | -0.05516 | 0.03048  | 0.17810  |
| 38 | C3 | PX  | 0.21555  | 0.00000  | -0.10083 | -0.00635 | 0.02063  |
| 39 | C3 | PY  | 0.04336  | 0.00000  | -0.03453 | -0.18246 | -0.00068 |
| 40 | C3 | PZ  | 0.00000  | -0.00444 | 0.00000  | 0.00000  | 0.00000  |
| 41 | C3 | S   | 1.16356  | 0.00000  | -0.37156 | 0.64553  | 2.49330  |
| 42 | C3 | PX  | -0.63667 | 0.00000  | 0.01213  | 0.24956  | -0.29754 |
| 43 | C3 | PY  | -1.04549 | 0.00000  | 0.16556  | 0.27177  | -0.71765 |
| 44 | C3 | PZ  | 0.00000  | 0.03084  | 0.00000  | 0.00000  | 0.00000  |
| 45 | C3 | DXX | -0.31491 | 0.00000  | 0.13479  | -0.09564 | -0.51703 |
| 46 | C3 | DYY | 0.32801  | 0.00000  | -0.14464 | 0.04557  | 0.37045  |
| 47 | C3 | DZZ | -0.16996 | 0.00000  | 0.03772  | -0.16649 | -0.39417 |
| 48 | C3 | DXY | -0.16663 | 0.00000  | 0.10350  | -0.28506 | 0.02189  |
| 49 | C3 | DXZ | 0.00000  | -0.00544 | 0.00000  | 0.00000  | 0.00000  |
| 50 | C3 | DYZ | 0.00000  | 0.00605  | 0.00000  | 0.00000  | 0.00000  |
| 51 | C4 | S   | 0.01782  | 0.00000  | 0.01042  | -0.03835 | -0.00276 |
| 52 | C4 | S   | -0.29156 | 0.00000  | -0.06824 | 0.25686  | -0.13951 |
| 53 | C4 | PX  | -0.22311 | 0.00000  | 0.16722  | -0.11911 | -0.08903 |
| 54 | C4 | PY  | -0.01447 | 0.00000  | -0.15586 | 0.08441  | 0.09410  |
| 55 | C4 | PZ  | 0.00000  | -0.02358 | 0.00000  | 0.00000  | 0.00000  |
| 56 | C4 | S   | 0.13151  | 0.00000  | 0.09312  | 0.23315  | 0.56294  |
| 57 | C4 | PX  | 0.78630  | 0.00000  | -0.11947 | 0.23658  | 0.38576  |
| 58 | C4 | PY  | -0.47668 | 0.00000  | 0.01132  | 0.34802  | -0.34398 |
| 59 | C4 | PZ  | 0.00000  | 0.01585  | 0.00000  | 0.00000  | 0.00000  |
| 60 | C4 | DXX | 0.16049  | 0.00000  | 0.00462  | -0.38714 | -0.05322 |
| 61 | C4 | DYY | -0.10402 | 0.00000  | 0.08647  | 0.21303  | 0.04442  |
| 62 | C4 | DZZ | 0.13309  | 0.00000  | 0.02062  | -0.21133 | 0.00865  |
| 63 | C4 | DXY | 0.33953  | 0.00000  | -0.42773 | -0.11679 | 0.20640  |
| 64 | C4 | DXZ | 0.00000  | 0.03387  | 0.00000  | 0.00000  | 0.00000  |
| 65 | C4 | DYZ | 0.00000  | -0.09218 | 0.00000  | 0.00000  | 0.00000  |
| 66 | C5 | S   | 0.00353  | 0.00000  | 0.01350  | -0.05711 | 0.01481  |
| 67 | C5 | S   | 0.06969  | 0.00000  | -0.13683 | 0.26443  | -0.05527 |
| 68 | C5 | PX  | -0.14079 | 0.00000  | 0.13612  | -0.05548 | 0.02111  |
| 69 | C5 | PY  | -0.18424 | 0.00000  | 0.07632  | 0.21217  | -0.12053 |
| 70 | C5 | PZ  | 0.00000  | 0.00408  | 0.00000  | 0.00000  | 0.00000  |
| 71 | C5 | S   | -0.08536 | 0.00000  | -0.00694 | 0.57427  | -0.38136 |
| 72 | C5 | PX  | 0.36684  | 0.00000  | -0.06941 | 0.04931  | 0.16441  |
| 73 | C5 | PY  | 0.47101  | 0.00000  | -0.21495 | 0.09315  | 0.28421  |
| 74 | C5 | PZ  | 0.00000  | -0.01602 | 0.00000  | 0.00000  | 0.00000  |
| 75 | C5 | DXX | -0.29463 | 0.00000  | 0.29226  | -0.03921 | -0.08136 |
| 76 | C5 | DYY | 0.40371  | 0.00000  | -0.29712 | 0.00568  | 0.08390  |
| 77 | C5 | DZZ | -0.02178 | 0.00000  | 0.09410  | -0.30115 | 0.07367  |
| 78 | C5 | DXY | -0.01983 | 0.00000  | 0.08344  | -0.31659 | 0.19302  |
| 79 | C5 | DXZ | 0.00000  | 0.00036  | 0.00000  | 0.00000  | 0.00000  |
| 80 | C5 | DYZ | 0.00000  | 0.01242  | 0.00000  | 0.00000  | 0.00000  |
| 81 | C6 | S   | 0.01174  | 0.00000  | 0.00114  | -0.01667 | 0.00679  |
| 82 | C6 | S   | -0.03211 | 0.00000  | 0.03766  | 0.06404  | 0.11738  |
| 83 | C6 | PX  | 0.14618  | 0.00000  | -0.09801 | 0.08441  | 0.07618  |
| 84 | C6 | PY  | 0.03218  | 0.00000  | 0.00842  | -0.04223 | 0.07304  |
| 85 | C6 | PZ  | 0.00000  | 0.00129  | 0.00000  | 0.00000  | 0.00000  |
| 86 | C6 | S   | -0.57866 | 0.00000  | -0.03019 | 0.37994  | -0.90544 |
| 87 | C6 | PX  | -0.95566 | 0.00000  | 0.22587  | -0.04892 | -0.83661 |
| 88 | C6 | PY  | -0.13015 | 0.00000  | 0.02429  | -0.09758 | 0.15435  |
| 89 | C6 | PZ  | 0.00000  | -0.01617 | 0.00000  | 0.00000  | 0.00000  |

|     |    |     |          |          |          |          |          |
|-----|----|-----|----------|----------|----------|----------|----------|
| 90  | C6 | DXX | 0.16254  | 0.00000  | -0.06380 | -0.08622 | 0.01576  |
| 91  | C6 | DYY | -0.20778 | 0.00000  | 0.08405  | 0.04323  | -0.09684 |
| 92  | C6 | DZZ | 0.05468  | 0.00000  | 0.00455  | -0.08785 | 0.03439  |
| 93  | C6 | DXY | 0.42157  | 0.00000  | -0.21106 | -0.02602 | 0.06040  |
| 94  | C6 | DXZ | 0.00000  | -0.00416 | 0.00000  | 0.00000  | 0.00000  |
| 95  | C6 | DYZ | 0.00000  | -0.00143 | 0.00000  | 0.00000  | 0.00000  |
| 96  | C7 | S   | 0.01627  | 0.00000  | 0.01213  | 0.01764  | 0.12393  |
| 97  | C7 | S   | -0.05967 | 0.00000  | -0.05777 | -0.18601 | -0.52593 |
| 98  | C7 | PX  | 0.10101  | 0.00000  | -0.14480 | 0.04996  | -0.50752 |
| 99  | C7 | PY  | -0.09597 | 0.00000  | 0.05669  | -0.12849 | -0.09881 |
| 100 | C7 | PZ  | 0.00000  | 0.00098  | 0.00000  | 0.00000  | 0.00000  |
| 101 | C7 | S   | -1.01012 | 0.00000  | 0.10279  | -0.23357 | -2.54037 |
| 102 | C7 | PX  | 0.64453  | 0.00000  | -0.19334 | -0.01940 | 0.65015  |
| 103 | C7 | PY  | 0.08204  | 0.00000  | 0.03575  | -0.09894 | -0.08237 |
| 104 | C7 | PZ  | 0.00000  | -0.00900 | 0.00000  | 0.00000  | 0.00000  |
| 105 | C7 | DXX | -0.00673 | 0.00000  | -0.11605 | -0.00446 | -0.73029 |
| 106 | C7 | DYY | -0.08285 | 0.00000  | 0.14599  | 0.00188  | 0.76712  |
| 107 | C7 | DZZ | 0.08711  | 0.00000  | 0.06831  | 0.10202  | 0.65335  |
| 108 | C7 | DXY | 0.24648  | 0.00000  | -0.08236 | 0.14791  | 0.40053  |
| 109 | C7 | DXZ | 0.00000  | -0.00042 | 0.00000  | 0.00000  | 0.00000  |
| 110 | C7 | DYZ | 0.00000  | 0.00065  | 0.00000  | 0.00000  | 0.00000  |
| 111 | O1 | S   | -0.02174 | 0.00000  | 0.03003  | 0.05677  | -0.00424 |
| 112 | O1 | S   | -0.06448 | 0.00000  | 0.01854  | 0.04798  | -0.03224 |
| 113 | O1 | PX  | 0.00361  | 0.00000  | -0.00308 | -0.00381 | 0.00440  |
| 114 | O1 | PY  | -0.00608 | 0.00000  | 0.02153  | 0.05499  | 0.01552  |
| 115 | O1 | PZ  | 0.00000  | -0.01481 | 0.00000  | 0.00000  | 0.00000  |
| 116 | O1 | S   | 0.46037  | 0.00000  | -0.41479 | -0.81581 | 0.16300  |
| 117 | O1 | PX  | -0.19866 | 0.00000  | -0.15781 | 0.06650  | -0.01149 |
| 118 | O1 | PY  | -0.17270 | 0.00000  | -0.18847 | 0.23186  | 0.06597  |
| 119 | O1 | PZ  | 0.00000  | 0.06877  | 0.00000  | 0.00000  | 0.00000  |
| 120 | O1 | DXX | -0.11208 | 0.00000  | -0.01397 | 0.25300  | 0.03996  |
| 121 | O1 | DYY | 0.09899  | 0.00000  | 0.18524  | -0.03604 | -0.05822 |
| 122 | O1 | DZZ | -0.13145 | 0.00000  | 0.05067  | 0.21649  | -0.01375 |
| 123 | O1 | DXY | 0.17386  | 0.00000  | -0.32174 | -0.17195 | 0.13234  |
| 124 | O1 | DXZ | 0.00000  | -0.05729 | 0.00000  | 0.00000  | 0.00000  |
| 125 | O1 | DYZ | 0.00000  | -0.14977 | 0.00000  | 0.00000  | 0.00000  |
| 126 | H4 | S   | -0.03565 | 0.00000  | 0.09228  | -0.28875 | 0.13253  |
| 127 | H4 | S   | -0.02751 | 0.00000  | 0.08881  | -0.17269 | 0.04526  |
| 128 | H4 | PX  | -0.17361 | 0.00000  | 0.20173  | -0.31169 | 0.08410  |
| 129 | H4 | PY  | -0.09448 | 0.00000  | 0.01729  | 0.21885  | -0.15207 |
| 130 | H4 | PZ  | 0.00000  | -0.00199 | 0.00000  | 0.00000  | 0.00000  |
| 131 | N1 | S   | 0.03613  | 0.00000  | -0.01552 | 0.00697  | 0.00294  |
| 132 | N1 | S   | -0.02891 | 0.00000  | 0.02441  | -0.06368 | 0.00404  |
| 133 | N1 | PX  | -0.00442 | 0.00000  | -0.00504 | 0.00495  | -0.02371 |
| 134 | N1 | PY  | 0.09936  | 0.00000  | -0.02682 | -0.04401 | 0.05013  |
| 135 | N1 | PZ  | 0.00000  | -0.00040 | 0.00000  | 0.00000  | 0.00000  |
| 136 | N1 | S   | -0.45477 | 0.00000  | 0.21232  | -0.03638 | 0.06202  |
| 137 | N1 | PX  | 0.06841  | 0.00000  | -0.00279 | 0.07758  | 0.00096  |
| 138 | N1 | PY  | 0.05631  | 0.00000  | -0.04246 | -0.12230 | -0.05502 |
| 139 | N1 | PZ  | 0.00000  | 0.00420  | 0.00000  | 0.00000  | 0.00000  |
| 140 | N1 | DXX | 0.07134  | 0.00000  | -0.04745 | 0.08152  | -0.16173 |
| 141 | N1 | DYY | 0.11243  | 0.00000  | -0.03556 | -0.01497 | 0.18733  |
| 142 | N1 | DZZ | 0.11176  | 0.00000  | -0.04451 | 0.01490  | 0.01002  |
| 143 | N1 | DXY | 0.38257  | 0.00000  | -0.16928 | -0.09427 | -0.08285 |

|     |     |     |          |          |          |          |          |
|-----|-----|-----|----------|----------|----------|----------|----------|
| 144 | N1  | DXZ | 0.00000  | 0.00090  | 0.00000  | 0.00000  | 0.00000  |
| 145 | N1  | DYZ | 0.00000  | 0.00052  | 0.00000  | 0.00000  | 0.00000  |
| 146 | H6  | S   | 0.00939  | 0.00000  | -0.10995 | 0.43963  | -0.08729 |
| 147 | H6  | S   | 0.05698  | 0.00000  | -0.08930 | 0.27649  | -0.04669 |
| 148 | H6  | PX  | 0.06245  | 0.00000  | -0.17682 | 0.57221  | -0.11630 |
| 149 | H6  | PY  | -0.21893 | 0.00000  | 0.08216  | 0.15956  | -0.06658 |
| 150 | H6  | PZ  | 0.00000  | -0.00093 | 0.00000  | 0.00000  | 0.00000  |
| 151 | C8  | S   | -0.02899 | 0.00000  | 0.00185  | 0.00975  | -0.02446 |
| 152 | C8  | S   | -0.20518 | 0.00000  | 0.08719  | -0.03861 | 0.05164  |
| 153 | C8  | PX  | -0.12877 | 0.00000  | 0.04285  | 0.00961  | -0.03294 |
| 154 | C8  | PY  | 0.17401  | 0.00000  | -0.06634 | -0.06549 | -0.21778 |
| 155 | C8  | PZ  | 0.00000  | 0.00006  | 0.00000  | 0.00000  | 0.00000  |
| 156 | C8  | S   | 1.26456  | 0.00000  | -0.25488 | -0.13479 | 0.81944  |
| 157 | C8  | PX  | 0.11475  | 0.00000  | 0.05854  | 0.15057  | 0.22129  |
| 158 | C8  | PY  | -0.04178 | 0.00000  | -0.01010 | 0.02830  | 0.80860  |
| 159 | C8  | PZ  | 0.00000  | 0.00053  | 0.00000  | 0.00000  | 0.00000  |
| 160 | C8  | DXX | 0.24312  | 0.00000  | -0.13852 | -0.07676 | -0.27063 |
| 161 | C8  | DYY | -0.28171 | 0.00000  | 0.13652  | 0.09150  | 0.28297  |
| 162 | C8  | DZZ | -0.12210 | 0.00000  | 0.00125  | 0.03945  | -0.13307 |
| 163 | C8  | DXY | 0.08833  | 0.00000  | -0.05437 | 0.00635  | -0.42037 |
| 164 | C8  | DXZ | 0.00000  | 0.00168  | 0.00000  | 0.00000  | 0.00000  |
| 165 | C8  | DYZ | 0.00000  | -0.00035 | 0.00000  | 0.00000  | 0.00000  |
| 166 | H8  | S   | 0.00072  | 0.00000  | 0.12414  | 0.05181  | 0.73192  |
| 167 | H8  | S   | -0.17716 | 0.00000  | 0.12712  | 0.02112  | 0.24212  |
| 168 | H8  | PX  | -0.02342 | 0.00000  | -0.16475 | -0.05007 | -0.95600 |
| 169 | H8  | PY  | -0.13100 | 0.00000  | 0.06528  | -0.03212 | -0.00717 |
| 170 | H8  | PZ  | 0.00000  | 0.00216  | 0.00000  | 0.00000  | 0.00000  |
| 171 | C10 | S   | 0.06815  | 0.00000  | -0.01885 | -0.00686 | -0.02857 |
| 172 | C10 | S   | -0.31628 | 0.00000  | 0.06674  | 0.02482  | 0.02399  |
| 173 | C10 | PX  | -0.08883 | 0.00000  | 0.03634  | -0.08219 | 0.32525  |
| 174 | C10 | PY  | 0.40527  | 0.00000  | -0.14451 | -0.08390 | -0.25392 |
| 175 | C10 | PZ  | 0.00000  | -0.00032 | 0.00000  | 0.00000  | 0.00000  |
| 176 | C10 | S   | -1.00652 | 0.00000  | 0.22597  | 0.09216  | 0.56594  |
| 177 | C10 | PX  | -0.02733 | 0.00000  | 0.00653  | -0.12838 | 0.02184  |
| 178 | C10 | PY  | -0.12520 | 0.00000  | 0.00518  | -0.03403 | 0.08364  |
| 179 | C10 | PZ  | 0.00000  | 0.00037  | 0.00000  | 0.00000  | 0.00000  |
| 180 | C10 | DXX | -0.47623 | 0.00000  | 0.14443  | 0.01262  | 0.38577  |
| 181 | C10 | DYY | 0.38702  | 0.00000  | -0.15028 | -0.01738 | -0.47863 |
| 182 | C10 | DZZ | 0.37661  | 0.00000  | -0.09496 | -0.03491 | -0.12158 |
| 183 | C10 | DXY | -0.20115 | 0.00000  | 0.06051  | 0.15413  | -0.27076 |
| 184 | C10 | DXZ | 0.00000  | 0.00018  | 0.00000  | 0.00000  | 0.00000  |
| 185 | C10 | DYZ | 0.00000  | -0.00032 | 0.00000  | 0.00000  | 0.00000  |
| 186 | H16 | S   | 0.34076  | 0.00000  | -0.09643 | 0.05304  | -0.34964 |
| 187 | H16 | S   | 0.24068  | 0.00000  | -0.07155 | 0.03543  | -0.17729 |
| 188 | H16 | PX  | -0.40442 | 0.00000  | 0.11145  | -0.05872 | 0.41377  |
| 189 | H16 | PY  | 0.30485  | 0.00000  | -0.09193 | -0.01547 | -0.18972 |
| 190 | H16 | PZ  | 0.00000  | -0.00013 | 0.00000  | 0.00000  | 0.00000  |
| 191 | H18 | S   | 0.31086  | 0.00000  | -0.07886 | -0.12254 | 0.09833  |
| 192 | H18 | S   | 0.20822  | 0.00000  | -0.05820 | -0.09852 | 0.00097  |
| 193 | H18 | PX  | 0.23677  | 0.00000  | -0.05342 | -0.10821 | 0.18093  |
| 194 | H18 | PY  | 0.42954  | 0.00000  | -0.11291 | -0.10738 | -0.00558 |
| 195 | H18 | PZ  | 0.00000  | -0.00020 | 0.00000  | 0.00000  | 0.00000  |
| 196 | C9  | S   | 0.00446  | 0.00000  | 0.00489  | 0.00023  | 0.00156  |
| 197 | C9  | S   | -0.05035 | 0.00000  | -0.11121 | 0.01756  | 0.02525  |



|     |    |     |          |          |          |          |          |
|-----|----|-----|----------|----------|----------|----------|----------|
| 198 | C9 | PX  | 0.22494  | 0.00000  | 0.22789  | 0.02425  | 0.02421  |
| 199 | C9 | PY  | -0.39396 | 0.00000  | -0.72340 | -0.05344 | 0.06142  |
| 200 | C9 | PZ  | 0.00000  | -0.93616 | 0.00000  | 0.00000  | 0.00000  |
| 201 | C9 | S   | 0.01718  | 0.00000  | 0.20625  | 0.05685  | -0.07997 |
| 202 | C9 | PX  | 0.11032  | 0.00000  | 0.09555  | -0.01239 | 0.01638  |
| 203 | C9 | PY  | -0.32189 | 0.00000  | -0.62238 | 0.07837  | 0.10418  |
| 204 | C9 | PZ  | 0.00000  | -0.55713 | 0.00000  | 0.00000  | 0.00000  |
| 205 | C9 | DXX | 0.06524  | 0.00000  | 0.46152  | 0.10463  | -0.09004 |
| 206 | C9 | DYY | -0.48476 | 0.00000  | -1.01742 | -0.11797 | 0.09306  |
| 207 | C9 | DZZ | 0.42974  | 0.00000  | 0.65516  | 0.02691  | -0.03130 |
| 208 | C9 | DXY | 0.08953  | 0.00000  | 0.10217  | -0.07092 | -0.02453 |
| 209 | C9 | DXZ | 0.00000  | -1.10350 | 0.00000  | 0.00000  | 0.00000  |
| 210 | C9 | DYZ | 0.00000  | 0.49943  | 0.00000  | 0.00000  | 0.00000  |
| 211 | H3 | S   | 0.40557  | 0.00000  | 0.74563  | 0.02812  | -0.06534 |
| 212 | H3 | S   | 0.29232  | 0.00000  | 0.52271  | -0.03563 | -0.06350 |
| 213 | H3 | PX  | 0.04819  | 0.00000  | 0.19897  | 0.05916  | -0.02394 |
| 214 | H3 | PY  | -0.56000 | 0.00000  | -1.00211 | -0.04927 | 0.08310  |
| 215 | H3 | PZ  | 0.00000  | -0.00307 | 0.00000  | 0.00000  | 0.00000  |
| 216 | H5 | S   | -0.19784 | -0.71098 | -0.35269 | -0.01789 | 0.03059  |
| 217 | H5 | S   | -0.10270 | -0.44057 | -0.19370 | -0.05420 | 0.02038  |
| 218 | H5 | PX  | 0.15861  | 0.50274  | 0.20699  | 0.00201  | -0.00728 |
| 219 | H5 | PY  | -0.05918 | -0.25740 | -0.08314 | -0.00525 | 0.00027  |
| 220 | H5 | PZ  | -0.18438 | -0.81389 | -0.35222 | -0.06184 | 0.02568  |
| 221 | H7 | S   | -0.19784 | 0.71098  | -0.35269 | -0.01789 | 0.03059  |
| 222 | H7 | S   | -0.10270 | 0.44057  | -0.19370 | -0.05420 | 0.02038  |
| 223 | H7 | PX  | 0.15861  | -0.50274 | 0.20699  | 0.00201  | -0.00728 |
| 224 | H7 | PY  | -0.05918 | 0.25740  | -0.08314 | -0.00525 | 0.00027  |
| 225 | H7 | PZ  | 0.18438  | -0.81389 | 0.35222  | 0.06184  | -0.02568 |

|              |           |           |           |           |           |
|--------------|-----------|-----------|-----------|-----------|-----------|
| MO:          | 211       | 212       | 213       | 214       | 215       |
| Eigenvalues: | 4.01961   | 4.19924   | 4.46531   | 4.49945   | 4.55630   |
| (ev):        | 109.37924 | 114.26708 | 121.50731 | 122.43635 | 123.98333 |

|    |    | A   | A        | A        | A        | A        |          |
|----|----|-----|----------|----------|----------|----------|----------|
| 1  | H1 | S   | 0.05238  | 0.42060  | -0.06761 | -0.09032 | -0.03515 |
| 2  | H1 | S   | 0.01356  | 0.32660  | -0.14795 | 0.02661  | -0.03198 |
| 3  | H1 | PX  | -0.06556 | -0.43544 | 0.01258  | 0.02020  | 0.00685  |
| 4  | H1 | PY  | -0.01971 | -0.19557 | 0.05414  | -0.01975 | -0.01138 |
| 5  | H1 | PZ  | 0.00000  | 0.00000  | 0.00000  | 0.00000  | 0.00000  |
| 6  | C1 | S   | 0.01999  | 0.04512  | 0.06293  | 0.16187  | 0.03114  |
| 7  | C1 | S   | -0.04619 | -0.27769 | -0.29317 | -1.19692 | -0.17674 |
| 8  | C1 | PX  | -0.05582 | -0.30012 | -0.00676 | 0.11692  | -0.00723 |
| 9  | C1 | PY  | 0.06887  | -0.08434 | 0.10595  | -0.10577 | -0.06703 |
| 10 | C1 | PZ  | 0.00000  | 0.00000  | 0.00000  | 0.00000  | 0.00000  |
| 11 | C1 | S   | -0.37984 | -0.05877 | -0.51838 | 0.08766  | 0.06404  |
| 12 | C1 | PX  | 0.08708  | -0.50947 | 0.61954  | -0.06755 | -0.00018 |
| 13 | C1 | PY  | 0.18770  | 0.13066  | -0.38015 | 0.65409  | 0.33653  |
| 14 | C1 | PZ  | 0.00000  | 0.00000  | 0.00000  | 0.00000  | 0.00000  |
| 15 | C1 | DXX | 0.01559  | -0.40195 | 0.26057  | 0.52667  | 0.07609  |
| 16 | C1 | DYY | 0.02539  | 0.60482  | 0.08740  | 0.72219  | 0.14779  |
| 17 | C1 | DZZ | 0.07429  | 0.21936  | 0.22961  | 0.65584  | 0.13701  |
| 18 | C1 | DXY | -0.10868 | -0.36305 | -0.07794 | 0.04189  | 0.05479  |
| 19 | C1 | DXZ | 0.00000  | 0.00000  | 0.00000  | 0.00000  | 0.00000  |
| 20 | C1 | DYZ | 0.00000  | 0.00000  | 0.00000  | 0.00000  | 0.00000  |

|    |    |     |          |          |          |          |          |
|----|----|-----|----------|----------|----------|----------|----------|
| 21 | C2 | S   | -0.03254 | -0.07363 | 0.11051  | 0.07582  | -0.22201 |
| 22 | C2 | S   | 0.13303  | 0.35253  | -0.74492 | -0.52691 | 1.41148  |
| 23 | C2 | PX  | -0.11047 | -0.32000 | -0.05947 | -0.03800 | 0.10979  |
| 24 | C2 | PY  | -0.12884 | -0.19698 | 0.05785  | -0.06610 | -0.00394 |
| 25 | C2 | PZ  | 0.00000  | 0.00000  | 0.00000  | 0.00000  | 0.00000  |
| 26 | C2 | S   | 0.31091  | 0.57541  | -0.17422 | -0.02858 | 0.81783  |
| 27 | C2 | PX  | 0.05714  | -0.25511 | -0.05617 | 0.07850  | 0.07984  |
| 28 | C2 | PY  | 0.13701  | -0.19040 | 0.05197  | 0.01583  | -0.17378 |
| 29 | C2 | PZ  | 0.00000  | 0.00000  | 0.00000  | 0.00000  | 0.00000  |
| 30 | C2 | DXX | 0.18451  | 0.40217  | 0.41835  | 0.28124  | -0.92516 |
| 31 | C2 | DYY | -0.25284 | -0.70467 | 0.47280  | 0.24147  | -0.83209 |
| 32 | C2 | DZZ | -0.15799 | -0.34741 | 0.43214  | 0.30145  | -0.83647 |
| 33 | C2 | DXY | 0.11911  | 0.49278  | 0.07797  | -0.02098 | -0.13922 |
| 34 | C2 | DXZ | 0.00000  | 0.00000  | 0.00000  | 0.00000  | 0.00000  |
| 35 | C2 | DYZ | 0.00000  | 0.00000  | 0.00000  | 0.00000  | 0.00000  |
| 36 | C3 | S   | -0.03354 | 0.03721  | 0.22553  | 0.01669  | -0.00069 |
| 37 | C3 | S   | -0.09321 | -0.12448 | -1.52284 | -0.16268 | 0.02789  |
| 38 | C3 | PX  | -0.05431 | 0.08836  | 0.03605  | -0.00775 | -0.15385 |
| 39 | C3 | PY  | 0.06655  | -0.16434 | 0.05906  | -0.07350 | 0.10518  |
| 40 | C3 | PZ  | 0.00000  | 0.00000  | 0.00000  | 0.00000  | 0.00000  |
| 41 | C3 | S   | 1.65074  | -0.59460 | -0.22710 | 0.71858  | -0.07820 |
| 42 | C3 | PX  | -0.11892 | 0.47811  | -0.62781 | 0.35906  | 0.86752  |
| 43 | C3 | PY  | -0.33187 | 0.24652  | -0.30534 | -0.29222 | -0.28731 |
| 44 | C3 | PZ  | 0.00000  | 0.00000  | 0.00000  | 0.00000  | 0.00000  |
| 45 | C3 | DXX | -0.16359 | 0.16446  | 0.80085  | 0.09009  | 0.04776  |
| 46 | C3 | DYY | 0.08562  | -0.02752 | 0.93418  | 0.02692  | -0.16576 |
| 47 | C3 | DZZ | -0.12379 | 0.13589  | 0.89966  | 0.06567  | 0.02166  |
| 48 | C3 | DXY | 0.06089  | -0.48724 | -0.02334 | -0.08949 | 0.09120  |
| 49 | C3 | DXZ | 0.00000  | 0.00000  | 0.00000  | 0.00000  | 0.00000  |
| 50 | C3 | DYZ | 0.00000  | 0.00000  | 0.00000  | 0.00000  | 0.00000  |
| 51 | C4 | S   | 0.00436  | -0.00375 | -0.02745 | 0.24471  | 0.02087  |
| 52 | C4 | S   | -0.10246 | 0.03484  | 0.03021  | -1.68713 | -0.18352 |
| 53 | C4 | PX  | 0.00466  | 0.01836  | -0.04067 | 0.03539  | -0.02618 |
| 54 | C4 | PY  | 0.06286  | 0.15536  | 0.03116  | 0.19308  | 0.00069  |
| 55 | C4 | PZ  | 0.00000  | 0.00000  | 0.00000  | 0.00000  | 0.00000  |
| 56 | C4 | S   | 0.21485  | -0.01328 | 0.91840  | -1.25031 | -0.38393 |
| 57 | C4 | PX  | -0.01885 | -0.20606 | 0.37129  | -0.82026 | -0.41615 |
| 58 | C4 | PY  | -0.09793 | 0.53027  | -0.36590 | -0.91350 | -0.58718 |
| 59 | C4 | PZ  | 0.00000  | 0.00000  | 0.00000  | 0.00000  | 0.00000  |
| 60 | C4 | DXX | -0.09138 | -0.56634 | -0.07325 | 0.83555  | 0.14058  |
| 61 | C4 | DYY | 0.12945  | 0.42866  | -0.08616 | 1.25198  | 0.13297  |
| 62 | C4 | DZZ | 0.01646  | -0.04352 | -0.09662 | 0.97941  | 0.10906  |
| 63 | C4 | DXY | 0.09569  | 0.09651  | 0.05211  | -0.12535 | -0.04021 |
| 64 | C4 | DXZ | 0.00000  | 0.00000  | 0.00000  | 0.00000  | 0.00000  |
| 65 | C4 | DYZ | 0.00000  | 0.00000  | 0.00000  | 0.00000  | 0.00000  |
| 66 | C5 | S   | 0.02315  | 0.03976  | -0.00807 | 0.22534  | -0.06199 |
| 67 | C5 | S   | -0.12148 | -0.17299 | 0.05796  | -1.38566 | 0.61563  |
| 68 | C5 | PX  | 0.07803  | 0.21768  | 0.01758  | -0.08912 | -0.01496 |
| 69 | C5 | PY  | -0.15886 | -0.30873 | 0.05657  | 0.03795  | -0.13449 |
| 70 | C5 | PZ  | 0.00000  | 0.00000  | 0.00000  | 0.00000  | 0.00000  |
| 71 | C5 | S   | -0.41042 | -0.37465 | -0.05383 | -0.99791 | -0.34589 |
| 72 | C5 | PX  | 0.07477  | 0.20863  | -0.05074 | -0.40540 | -0.34855 |
| 73 | C5 | PY  | -0.00342 | -0.26822 | 0.23193  | 0.17674  | 0.23719  |
| 74 | C5 | PZ  | 0.00000  | 0.00000  | 0.00000  | 0.00000  | 0.00000  |

|     |    |     |          |          |          |          |          |
|-----|----|-----|----------|----------|----------|----------|----------|
| 75  | C5 | DXX | -0.00571 | 0.11468  | -0.05639 | 0.84479  | -0.32066 |
| 76  | C5 | DYY | 0.05003  | 0.00874  | -0.11059 | 0.90651  | -0.24310 |
| 77  | C5 | DZZ | 0.11939  | 0.20612  | -0.02683 | 0.86193  | -0.24736 |
| 78  | C5 | DXY | 0.32048  | 0.83126  | -0.00444 | -0.12804 | 0.00947  |
| 79  | C5 | DXZ | 0.00000  | 0.00000  | 0.00000  | 0.00000  | 0.00000  |
| 80  | C5 | DYZ | 0.00000  | 0.00000  | 0.00000  | 0.00000  | 0.00000  |
| 81  | C6 | S   | 0.01696  | -0.00645 | 0.18480  | -0.00099 | -0.23363 |
| 82  | C6 | S   | 0.12234  | -0.05298 | -1.09991 | -0.05776 | 1.31616  |
| 83  | C6 | PX  | -0.03291 | -0.03362 | -0.05681 | 0.01765  | -0.05894 |
| 84  | C6 | PY  | -0.09705 | 0.19202  | -0.23172 | -0.03329 | 0.07959  |
| 85  | C6 | PZ  | 0.00000  | 0.00000  | 0.00000  | 0.00000  | 0.00000  |
| 86  | C6 | S   | -0.39371 | 0.13958  | -2.24508 | 0.21419  | 0.28892  |
| 87  | C6 | PX  | -0.49657 | 0.56608  | -0.43436 | 0.04325  | 0.78034  |
| 88  | C6 | PY  | -0.31092 | 0.25014  | 0.97916  | 0.15625  | 0.75503  |
| 89  | C6 | PZ  | 0.00000  | 0.00000  | 0.00000  | 0.00000  | 0.00000  |
| 90  | C6 | DXX | 0.04410  | 0.43170  | 0.58175  | -0.02206 | -0.79131 |
| 91  | C6 | DYY | 0.03900  | -0.39870 | 0.91161  | 0.02741  | -0.96278 |
| 92  | C6 | DZZ | 0.02936  | 0.01322  | 0.72441  | -0.01041 | -0.86131 |
| 93  | C6 | DXY | 0.10864  | -0.20361 | 0.03490  | 0.00351  | -0.05320 |
| 94  | C6 | DXZ | 0.00000  | 0.00000  | 0.00000  | 0.00000  | 0.00000  |
| 95  | C6 | DYZ | 0.00000  | 0.00000  | 0.00000  | 0.00000  | 0.00000  |
| 96  | C7 | S   | 0.07185  | -0.05628 | 0.16091  | -0.00690 | 0.16726  |
| 97  | C7 | S   | -0.29192 | 0.22557  | -1.12748 | 0.14890  | -1.03616 |
| 98  | C7 | PX  | -0.06768 | 0.17838  | 0.09264  | 0.01377  | 0.05661  |
| 99  | C7 | PY  | 0.15070  | -0.19337 | -0.11562 | -0.04993 | 0.08142  |
| 100 | C7 | PZ  | 0.00000  | 0.00000  | 0.00000  | 0.00000  | 0.00000  |
| 101 | C7 | S   | -1.61883 | 0.57561  | -0.22347 | -0.83128 | -0.49679 |
| 102 | C7 | PX  | 0.65247  | -0.08131 | -0.11361 | 0.43866  | 0.04054  |
| 103 | C7 | PY  | 0.01226  | -0.16872 | 0.39227  | -0.10957 | -0.57377 |
| 104 | C7 | PZ  | 0.00000  | 0.00000  | 0.00000  | 0.00000  | 0.00000  |
| 105 | C7 | DXX | -0.24434 | 0.17728  | 0.67985  | -0.06044 | 0.76859  |
| 106 | C7 | DYY | 0.30826  | -0.44821 | 0.56582  | -0.11399 | 0.61964  |
| 107 | C7 | DZZ | 0.32297  | -0.23907 | 0.64082  | -0.03516 | 0.61664  |
| 108 | C7 | DXY | -0.19324 | 0.11906  | 0.07442  | 0.01787  | -0.15719 |
| 109 | C7 | DXZ | 0.00000  | 0.00000  | 0.00000  | 0.00000  | 0.00000  |
| 110 | C7 | DYZ | 0.00000  | 0.00000  | 0.00000  | 0.00000  | 0.00000  |
| 111 | O1 | S   | 0.00788  | 0.04304  | 0.02189  | -0.30999 | -0.14067 |
| 112 | O1 | S   | -0.03432 | -0.02952 | 0.01443  | -0.29474 | -0.14924 |
| 113 | O1 | PX  | 0.00129  | -0.01209 | 0.01159  | -0.10694 | -0.04640 |
| 114 | O1 | PY  | 0.02632  | 0.09279  | -0.00872 | 0.16350  | 0.04107  |
| 115 | O1 | PZ  | 0.00000  | 0.00000  | 0.00000  | 0.00000  | 0.00000  |
| 116 | O1 | S   | 0.00284  | -0.56689 | -0.21340 | 3.76790  | 1.80192  |
| 117 | O1 | PX  | 0.03887  | 0.18628  | -0.08698 | 0.53648  | 0.22410  |
| 118 | O1 | PY  | 0.07617  | 0.33040  | 0.02472  | -0.23892 | -0.23820 |
| 119 | O1 | PZ  | 0.00000  | 0.00000  | 0.00000  | 0.00000  | 0.00000  |
| 120 | O1 | DXX | 0.08159  | 0.29480  | 0.07141  | -0.94077 | -0.45566 |
| 121 | O1 | DYY | -0.04544 | -0.11730 | 0.07566  | -1.21863 | -0.44666 |
| 122 | O1 | DZZ | 0.02575  | 0.12811  | 0.07856  | -1.04829 | -0.48461 |
| 123 | O1 | DXY | 0.06685  | 0.02756  | 0.02196  | -0.06374 | -0.03226 |
| 124 | O1 | DXZ | 0.00000  | 0.00000  | 0.00000  | 0.00000  | 0.00000  |
| 125 | O1 | DYZ | 0.00000  | 0.00000  | 0.00000  | 0.00000  | 0.00000  |
| 126 | H4 | S   | 0.22385  | 0.50903  | 0.00094  | -0.20086 | 0.02974  |
| 127 | H4 | S   | 0.13849  | 0.29796  | -0.07197 | -0.03274 | -0.18423 |
| 128 | H4 | PX  | 0.18874  | 0.41591  | 0.00861  | -0.10504 | 0.03014  |

|     |     |     |          |          |          |          |          |
|-----|-----|-----|----------|----------|----------|----------|----------|
| 129 | H4  | PY  | -0.19603 | -0.37822 | -0.02558 | 0.13864  | -0.00134 |
| 130 | H4  | PZ  | 0.00000  | 0.00000  | 0.00000  | 0.00000  | 0.00000  |
| 131 | N1  | S   | -0.01223 | 0.00140  | -0.34702 | 0.02680  | -0.06725 |
| 132 | N1  | S   | 0.10594  | 0.13094  | 0.28687  | -0.04322 | 0.09092  |
| 133 | N1  | PX  | 0.11167  | -0.02741 | -0.15981 | 0.01099  | -0.06525 |
| 134 | N1  | PY  | -0.03901 | 0.18457  | -0.20052 | -0.00132 | 0.12438  |
| 135 | N1  | PZ  | 0.00000  | 0.00000  | 0.00000  | 0.00000  | 0.00000  |
| 136 | N1  | S   | -0.05925 | -0.04821 | 4.42827  | -0.25263 | 1.06290  |
| 137 | N1  | PX  | 0.26939  | -0.29924 | 0.86802  | -0.10374 | -0.14208 |
| 138 | N1  | PY  | -0.36115 | 0.31523  | 0.54607  | -0.04736 | 0.60450  |
| 139 | N1  | PZ  | 0.00000  | 0.00000  | 0.00000  | 0.00000  | 0.00000  |
| 140 | N1  | DXX | 0.23748  | -0.20333 | -1.04354 | 0.08676  | -0.36600 |
| 141 | N1  | DYY | -0.24407 | 0.22959  | -1.16156 | 0.07326  | -0.01533 |
| 142 | N1  | DZZ | -0.02881 | 0.00515  | -1.10089 | 0.09095  | -0.21733 |
| 143 | N1  | DXY | 0.00259  | 0.06411  | 0.02702  | -0.02515 | 0.07938  |
| 144 | N1  | DXZ | 0.00000  | 0.00000  | 0.00000  | 0.00000  | 0.00000  |
| 145 | N1  | DYZ | 0.00000  | 0.00000  | 0.00000  | 0.00000  | 0.00000  |
| 146 | H6  | S   | -0.18256 | -0.50238 | -0.08590 | -0.02774 | 0.18270  |
| 147 | H6  | S   | -0.05331 | -0.30603 | 0.03516  | 0.05986  | -0.14565 |
| 148 | H6  | PX  | -0.22448 | -0.53618 | -0.05925 | -0.01748 | 0.15721  |
| 149 | H6  | PY  | -0.06795 | -0.14587 | -0.02667 | 0.01034  | 0.03025  |
| 150 | H6  | PZ  | 0.00000  | 0.00000  | 0.00000  | 0.00000  | 0.00000  |
| 151 | C8  | S   | -0.02125 | 0.00373  | 0.05600  | -0.01328 | 0.22719  |
| 152 | C8  | S   | 0.00917  | 0.00839  | -0.47320 | 0.03205  | -1.40937 |
| 153 | C8  | PX  | 0.02347  | -0.05968 | -0.12728 | 0.01893  | -0.05201 |
| 154 | C8  | PY  | -0.06597 | 0.05703  | 0.01759  | -0.00490 | 0.05432  |
| 155 | C8  | PZ  | 0.00000  | 0.00000  | 0.00000  | 0.00000  | 0.00000  |
| 156 | C8  | S   | 0.46260  | -0.03588 | -0.80560 | 0.42349  | -0.77918 |
| 157 | C8  | PX  | 0.59320  | -0.38131 | 1.01949  | 0.04977  | -0.39607 |
| 158 | C8  | PY  | 0.63985  | -0.05400 | -0.40167 | 0.32567  | -0.31359 |
| 159 | C8  | PZ  | 0.00000  | 0.00000  | 0.00000  | 0.00000  | 0.00000  |
| 160 | C8  | DXX | -0.34037 | 0.20348  | 0.36855  | -0.04595 | 0.93621  |
| 161 | C8  | DYY | 0.31135  | -0.17232 | 0.14782  | -0.01243 | 0.81223  |
| 162 | C8  | DZZ | -0.08884 | 0.01366  | 0.26245  | -0.04932 | 0.87388  |
| 163 | C8  | DXY | 0.54789  | -0.12296 | -0.11313 | 0.01978  | -0.07895 |
| 164 | C8  | DXZ | 0.00000  | 0.00000  | 0.00000  | 0.00000  | 0.00000  |
| 165 | C8  | DYZ | 0.00000  | 0.00000  | 0.00000  | 0.00000  | 0.00000  |
| 166 | H8  | S   | 0.21110  | -0.21033 | -0.10048 | -0.00764 | -0.17952 |
| 167 | H8  | S   | -0.04600 | -0.11455 | 0.13187  | -0.11605 | 0.04454  |
| 168 | H8  | PX  | -0.27900 | 0.24804  | 0.08306  | -0.00346 | 0.16293  |
| 169 | H8  | PY  | 0.11133  | -0.05603 | -0.03499 | -0.00304 | 0.06147  |
| 170 | H8  | PZ  | 0.00000  | 0.00000  | 0.00000  | 0.00000  | 0.00000  |
| 171 | C10 | S   | 0.00273  | 0.00251  | 0.06266  | -0.00949 | 0.14411  |
| 172 | C10 | S   | -0.02826 | 0.01936  | -0.37344 | 0.07356  | -1.03245 |
| 173 | C10 | PX  | -0.66643 | 0.09712  | 0.00442  | 0.00573  | 0.03998  |
| 174 | C10 | PY  | -0.20270 | 0.09686  | 0.00485  | 0.00441  | -0.13293 |
| 175 | C10 | PZ  | 0.00000  | 0.00000  | 0.00000  | 0.00000  | 0.00000  |
| 176 | C10 | S   | 0.22659  | -0.00831 | -0.41056 | 0.11917  | -0.32244 |
| 177 | C10 | PX  | -0.63937 | 0.12325  | -0.21821 | -0.08952 | 0.11720  |
| 178 | C10 | PY  | -0.08717 | 0.05896  | -0.15835 | 0.00267  | 0.07726  |
| 179 | C10 | PZ  | 0.00000  | 0.00000  | 0.00000  | 0.00000  | 0.00000  |
| 180 | C10 | DXX | -0.35242 | 0.03256  | 0.23775  | -0.04356 | 0.66984  |
| 181 | C10 | DYY | 0.35324  | -0.01470 | 0.22984  | -0.04810 | 0.55412  |
| 182 | C10 | DZZ | 0.02019  | 0.00544  | 0.25101  | -0.03585 | 0.54174  |

|     |     |     |          |          |          |          |          |
|-----|-----|-----|----------|----------|----------|----------|----------|
| 183 | C10 | DXY | 1.13664  | -0.24974 | -0.08317 | 0.00231  | 0.00663  |
| 184 | C10 | DXZ | 0.00000  | 0.00000  | 0.00000  | 0.00000  | 0.00000  |
| 185 | C10 | DYZ | 0.00000  | 0.00000  | 0.00000  | 0.00000  | 0.00000  |
| 186 | H16 | S   | 0.64166  | -0.10022 | -0.02476 | 0.01855  | -0.12642 |
| 187 | H16 | S   | 0.33609  | -0.03704 | 0.10428  | 0.02219  | 0.04429  |
| 188 | H16 | PX  | -0.74491 | 0.11376  | 0.04591  | -0.00619 | 0.09459  |
| 189 | H16 | PY  | 0.08201  | 0.01810  | 0.00859  | 0.00260  | -0.01655 |
| 190 | H16 | PZ  | 0.00000  | 0.00000  | 0.00000  | 0.00000  | 0.00000  |
| 191 | H18 | S   | -0.68099 | 0.13862  | 0.00024  | -0.00378 | -0.09496 |
| 192 | H18 | S   | -0.37589 | 0.08352  | -0.04942 | -0.03903 | 0.15639  |
| 193 | H18 | PX  | -0.67291 | 0.13016  | -0.00405 | 0.00329  | -0.05655 |
| 194 | H18 | PY  | -0.42637 | 0.08859  | 0.02605  | 0.00426  | -0.04170 |
| 195 | H18 | PZ  | 0.00000  | 0.00000  | 0.00000  | 0.00000  | 0.00000  |
| 196 | C9  | S   | 0.00292  | 0.01130  | 0.00487  | -0.07958 | -0.02992 |
| 197 | C9  | S   | -0.00740 | -0.08705 | -0.03635 | 0.45887  | 0.17939  |
| 198 | C9  | PX  | 0.02418  | 0.06893  | 0.00023  | -0.03155 | -0.01291 |
| 199 | C9  | PY  | 0.04680  | 0.07240  | 0.00125  | 0.05252  | 0.00922  |
| 200 | C9  | PZ  | 0.00000  | 0.00000  | 0.00000  | 0.00000  | 0.00000  |
| 201 | C9  | S   | -0.05380 | -0.10988 | 0.06452  | -0.56474 | -0.24850 |
| 202 | C9  | PX  | 0.00913  | 0.04618  | -0.01730 | 0.26417  | 0.09877  |
| 203 | C9  | PY  | 0.07192  | 0.09396  | -0.03955 | 0.06331  | 0.04008  |
| 204 | C9  | PZ  | 0.00000  | 0.00000  | 0.00000  | 0.00000  | 0.00000  |
| 205 | C9  | DXX | -0.04568 | -0.00834 | 0.00288  | -0.16729 | -0.05081 |
| 206 | C9  | DYY | 0.06795  | 0.09321  | 0.02603  | -0.31244 | -0.13468 |
| 207 | C9  | DZZ | -0.01609 | 0.02582  | 0.02905  | -0.43285 | -0.15698 |
| 208 | C9  | DXY | -0.03038 | -0.09392 | -0.00212 | 0.04006  | 0.02405  |
| 209 | C9  | DXZ | 0.00000  | 0.00000  | 0.00000  | 0.00000  | 0.00000  |
| 210 | C9  | DYZ | 0.00000  | 0.00000  | 0.00000  | 0.00000  | 0.00000  |
| 211 | H3  | S   | -0.04774 | -0.06284 | -0.00650 | 0.10588  | 0.05090  |
| 212 | H3  | S   | -0.04305 | -0.04268 | 0.00993  | 0.03247  | 0.01716  |
| 213 | H3  | PX  | -0.00914 | 0.01227  | -0.00402 | 0.04407  | 0.01424  |
| 214 | H3  | PY  | 0.05857  | 0.07393  | 0.00370  | -0.02470 | -0.02433 |
| 215 | H3  | PZ  | 0.00000  | 0.00000  | 0.00000  | 0.00000  | 0.00000  |
| 216 | H5  | S   | 0.02019  | 0.01318  | -0.01453 | 0.12670  | 0.04988  |
| 217 | H5  | S   | 0.01100  | -0.00880 | 0.00125  | 0.03032  | 0.01902  |
| 218 | H5  | PX  | -0.00938 | -0.01180 | 0.00432  | -0.07579 | -0.02415 |
| 219 | H5  | PY  | 0.00234  | 0.00417  | -0.00085 | 0.02840  | 0.00543  |
| 220 | H5  | PZ  | 0.01291  | -0.01067 | -0.00189 | 0.05548  | 0.02051  |
| 221 | H7  | S   | 0.02019  | 0.01318  | -0.01453 | 0.12670  | 0.04988  |
| 222 | H7  | S   | 0.01100  | -0.00880 | 0.00125  | 0.03032  | 0.01902  |
| 223 | H7  | PX  | -0.00938 | -0.01180 | 0.00432  | -0.07579 | -0.02415 |
| 224 | H7  | PY  | 0.00234  | 0.00417  | -0.00085 | 0.02840  | 0.00543  |
| 225 | H7  | PZ  | -0.01291 | 0.01067  | 0.00189  | -0.05548 | -0.02051 |

|              |           |           |           |           |           |
|--------------|-----------|-----------|-----------|-----------|-----------|
| MO:          | 216       | 217       | 218       | 219       | 220       |
| Eigenvalues: | 4.59956   | 4.67304   | 4.70236   | 4.83284   | 4.88374   |
| (ev):        | 125.16054 | 127.15986 | 127.95773 | 131.50831 | 132.89343 |

|   |    | A  | A        | A        | A        | A        |          |
|---|----|----|----------|----------|----------|----------|----------|
| 1 | H1 | S  | -0.23702 | -0.16601 | -0.10093 | 0.07080  | -0.21583 |
| 2 | H1 | S  | -0.00931 | 0.29199  | 0.00026  | 0.05627  | -0.00724 |
| 3 | H1 | PX | 0.17444  | 0.20987  | 0.07876  | -0.04839 | 0.20319  |
| 4 | H1 | PY | 0.09700  | 0.09270  | 0.02133  | -0.05525 | 0.06766  |
| 5 | H1 | PZ | 0.00000  | 0.00000  | 0.00000  | 0.00000  | 0.00000  |

|    |    |     |          |          |          |          |          |
|----|----|-----|----------|----------|----------|----------|----------|
| 6  | C1 | S   | 0.22343  | 0.16795  | 0.12073  | -0.05839 | 0.22856  |
| 7  | C1 | S   | -1.42321 | -1.13744 | -0.70925 | 0.25662  | -1.27556 |
| 8  | C1 | PX  | 0.04287  | 0.08541  | 0.02106  | 0.02478  | -0.00735 |
| 9  | C1 | PY  | 0.11549  | 0.13744  | -0.00654 | -0.03635 | -0.07733 |
| 10 | C1 | PZ  | 0.00000  | 0.00000  | 0.00000  | 0.00000  | 0.00000  |
| 11 | C1 | S   | -0.31807 | -0.43618 | -0.53642 | 0.57502  | -1.72029 |
| 12 | C1 | PX  | 0.28932  | -0.39508 | 0.16287  | -0.37658 | 0.51530  |
| 13 | C1 | PY  | -0.22476 | -0.59465 | 0.25951  | 0.22574  | 0.17688  |
| 14 | C1 | PZ  | 0.00000  | 0.00000  | 0.00000  | 0.00000  | 0.00000  |
| 15 | C1 | DXX | 1.08640  | 0.95993  | 0.52779  | -0.29664 | 1.05935  |
| 16 | C1 | DYY | 0.76041  | 0.58369  | 0.46883  | -0.14959 | 1.03708  |
| 17 | C1 | DZZ | 0.84655  | 0.59650  | 0.46004  | -0.20455 | 0.82433  |
| 18 | C1 | DXY | -0.02205 | 0.06129  | -0.00314 | 0.03661  | 0.08725  |
| 19 | C1 | DXZ | 0.00000  | 0.00000  | 0.00000  | 0.00000  | 0.00000  |
| 20 | C1 | DYZ | 0.00000  | 0.00000  | 0.00000  | 0.00000  | 0.00000  |
| 21 | C2 | S   | -0.18761 | 0.07713  | -0.01431 | 0.05594  | 0.20479  |
| 22 | C2 | S   | 1.22312  | -0.52336 | 0.19327  | -0.31505 | -1.15705 |
| 23 | C2 | PX  | 0.03966  | -0.06708 | -0.01033 | -0.06408 | 0.02110  |
| 24 | C2 | PY  | 0.09869  | -0.08269 | 0.15160  | 0.13203  | 0.07154  |
| 25 | C2 | PZ  | 0.00000  | 0.00000  | 0.00000  | 0.00000  | 0.00000  |
| 26 | C2 | S   | 0.32372  | -0.48718 | -0.35597 | 0.27026  | -1.45564 |
| 27 | C2 | PX  | 0.16691  | -0.07137 | -0.13398 | 0.25138  | -0.55155 |
| 28 | C2 | PY  | 0.25386  | 0.30870  | -0.02369 | 0.30788  | -0.44133 |
| 29 | C2 | PZ  | 0.00000  | 0.00000  | 0.00000  | 0.00000  | 0.00000  |
| 30 | C2 | DXX | -0.84693 | 0.35837  | -0.12992 | 0.28969  | 0.99797  |
| 31 | C2 | DYY | -0.67837 | 0.27481  | 0.00005  | 0.26367  | 0.96904  |
| 32 | C2 | DZZ | -0.72659 | 0.27167  | -0.07066 | 0.18168  | 0.72728  |
| 33 | C2 | DXY | -0.03247 | 0.03215  | 0.08250  | 0.19464  | 0.05129  |
| 34 | C2 | DXZ | 0.00000  | 0.00000  | 0.00000  | 0.00000  | 0.00000  |
| 35 | C2 | DYZ | 0.00000  | 0.00000  | 0.00000  | 0.00000  | 0.00000  |
| 36 | C3 | S   | 0.20885  | 0.10994  | -0.05899 | -0.07183 | -0.19306 |
| 37 | C3 | S   | -1.33722 | -0.70541 | 0.38799  | 0.39964  | 1.21808  |
| 38 | C3 | PX  | 0.00214  | 0.00140  | 0.08414  | 0.01702  | -0.05621 |
| 39 | C3 | PY  | -0.07103 | -0.09750 | -0.14352 | 0.07309  | -0.02630 |
| 40 | C3 | PZ  | 0.00000  | 0.00000  | 0.00000  | 0.00000  | 0.00000  |
| 41 | C3 | S   | 0.03445  | -0.68501 | 0.83563  | 1.09511  | 0.45288  |
| 42 | C3 | PX  | -0.43950 | -0.04198 | -0.12515 | 0.12894  | 0.02863  |
| 43 | C3 | PY  | -0.57256 | 0.50408  | -0.07284 | -0.03955 | 0.48535  |
| 44 | C3 | PZ  | 0.00000  | 0.00000  | 0.00000  | 0.00000  | 0.00000  |
| 45 | C3 | DXX | 0.86781  | 0.45049  | -0.27904 | -0.34939 | -0.74893 |
| 46 | C3 | DYY | 0.83977  | 0.37835  | -0.13241 | -0.36148 | -1.06712 |
| 47 | C3 | DZZ | 0.80893  | 0.40979  | -0.23002 | -0.26199 | -0.70670 |
| 48 | C3 | DXY | -0.03639 | 0.00383  | -0.09388 | -0.04419 | 0.05390  |
| 49 | C3 | DXZ | 0.00000  | 0.00000  | 0.00000  | 0.00000  | 0.00000  |
| 50 | C3 | DYZ | 0.00000  | 0.00000  | 0.00000  | 0.00000  | 0.00000  |
| 51 | C4 | S   | 0.00572  | 0.04456  | 0.02070  | 0.06792  | -0.02227 |
| 52 | C4 | S   | -0.14780 | -0.13260 | -0.20119 | -0.34050 | 0.03381  |
| 53 | C4 | PX  | -0.15404 | -0.04261 | -0.09216 | 0.03161  | -0.13913 |
| 54 | C4 | PY  | 0.05650  | 0.05701  | 0.02844  | -0.01560 | 0.03527  |
| 55 | C4 | PZ  | 0.00000  | 0.00000  | 0.00000  | 0.00000  | 0.00000  |
| 56 | C4 | S   | 0.03088  | 0.59373  | -0.37235 | -1.08016 | 0.45110  |
| 57 | C4 | PX  | 0.12397  | 0.66453  | -0.06212 | -0.43289 | 0.39796  |
| 58 | C4 | PY  | -0.25562 | 1.65213  | -0.34641 | -0.00526 | -0.21974 |
| 59 | C4 | PZ  | 0.00000  | 0.00000  | 0.00000  | 0.00000  | 0.00000  |

|     |    |     |          |          |          |          |          |
|-----|----|-----|----------|----------|----------|----------|----------|
| 60  | C4 | DXX | 0.11257  | 0.08827  | 0.16020  | 0.33976  | -0.05545 |
| 61  | C4 | DYY | -0.07709 | 0.00284  | 0.05980  | 0.28043  | -0.15458 |
| 62  | C4 | DZZ | 0.04840  | 0.11247  | 0.09640  | 0.24084  | -0.05926 |
| 63  | C4 | DXY | 0.10032  | 0.11719  | 0.04748  | -0.02110 | 0.10537  |
| 64  | C4 | DXZ | 0.00000  | 0.00000  | 0.00000  | 0.00000  | 0.00000  |
| 65  | C4 | DYZ | 0.00000  | 0.00000  | 0.00000  | 0.00000  | 0.00000  |
| 66  | C5 | S   | -0.19065 | 0.05662  | -0.17808 | -0.16842 | -0.14296 |
| 67  | C5 | S   | 1.17305  | -0.64774 | 1.09261  | 0.95383  | 0.85926  |
| 68  | C5 | PX  | -0.03799 | -0.06620 | 0.01437  | 0.01512  | 0.08417  |
| 69  | C5 | PY  | -0.06423 | 0.07587  | -0.00255 | 0.04020  | 0.08751  |
| 70  | C5 | PZ  | 0.00000  | 0.00000  | 0.00000  | 0.00000  | 0.00000  |
| 71  | C5 | S   | 0.37235  | 0.53776  | 0.66316  | 0.26837  | 1.27344  |
| 72  | C5 | PX  | 0.15225  | 0.71391  | 0.08389  | 0.26824  | 0.07745  |
| 73  | C5 | PY  | 0.01208  | -0.49611 | -0.08170 | -0.03103 | -0.30875 |
| 74  | C5 | PZ  | 0.00000  | 0.00000  | 0.00000  | 0.00000  | 0.00000  |
| 75  | C5 | DXX | -0.76796 | 0.32649  | -0.75137 | -0.71027 | -0.63589 |
| 76  | C5 | DYY | -0.72151 | 0.36161  | -0.81222 | -0.81735 | -0.82197 |
| 77  | C5 | DZZ | -0.73849 | 0.20112  | -0.65903 | -0.61452 | -0.48817 |
| 78  | C5 | DXY | -0.01368 | -0.08543 | 0.02731  | 0.05786  | 0.05804  |
| 79  | C5 | DXZ | 0.00000  | 0.00000  | 0.00000  | 0.00000  | 0.00000  |
| 80  | C5 | DYZ | 0.00000  | 0.00000  | 0.00000  | 0.00000  | 0.00000  |
| 81  | C6 | S   | 0.00981  | 0.00425  | 0.13073  | 0.17498  | -0.11369 |
| 82  | C6 | S   | 0.07306  | -0.10131 | -0.71158 | -1.01782 | 0.59394  |
| 83  | C6 | PX  | -0.09500 | 0.01025  | 0.01927  | 0.04688  | 0.07034  |
| 84  | C6 | PY  | 0.02477  | 0.04576  | -0.04893 | 0.00192  | -0.02914 |
| 85  | C6 | PZ  | 0.00000  | 0.00000  | 0.00000  | 0.00000  | 0.00000  |
| 86  | C6 | S   | 0.00910  | 2.45219  | -0.78808 | 0.92326  | -0.28447 |
| 87  | C6 | PX  | -0.60903 | 0.07322  | -0.47914 | -0.05260 | 0.21694  |
| 88  | C6 | PY  | -0.44221 | -1.42148 | 0.20905  | -1.71882 | 1.01258  |
| 89  | C6 | PZ  | 0.00000  | 0.00000  | 0.00000  | 0.00000  | 0.00000  |
| 90  | C6 | DXX | -0.10104 | -0.02436 | 0.50674  | 0.76345  | -0.36687 |
| 91  | C6 | DYY | 0.05670  | -0.04021 | 0.60112  | 0.74290  | -0.55509 |
| 92  | C6 | DZZ | 0.01018  | -0.00805 | 0.48072  | 0.61777  | -0.38834 |
| 93  | C6 | DXY | -0.09288 | -0.07837 | 0.00757  | -0.02720 | 0.13663  |
| 94  | C6 | DXZ | 0.00000  | 0.00000  | 0.00000  | 0.00000  | 0.00000  |
| 95  | C6 | DYZ | 0.00000  | 0.00000  | 0.00000  | 0.00000  | 0.00000  |
| 96  | C7 | S   | 0.00870  | 0.03577  | -0.25576 | 0.10037  | -0.01818 |
| 97  | C7 | S   | -0.00776 | -0.26321 | 1.63117  | -0.46407 | 0.09228  |
| 98  | C7 | PX  | 0.03972  | 0.04914  | -0.07919 | 0.03125  | -0.04857 |
| 99  | C7 | PY  | -0.15294 | 0.05404  | -0.00790 | 0.09633  | 0.14459  |
| 100 | C7 | PZ  | 0.00000  | 0.00000  | 0.00000  | 0.00000  | 0.00000  |
| 101 | C7 | S   | -0.77910 | 0.51992  | 0.40229  | -0.88280 | 0.78622  |
| 102 | C7 | PX  | 0.54319  | 0.40822  | 0.00630  | 0.73908  | -0.63494 |
| 103 | C7 | PY  | 0.33380  | -0.28523 | -0.00463 | -0.35477 | -0.00600 |
| 104 | C7 | PZ  | 0.00000  | 0.00000  | 0.00000  | 0.00000  | 0.00000  |
| 105 | C7 | DXX | -0.02747 | 0.11113  | -1.27872 | 0.43726  | 0.04081  |
| 106 | C7 | DYY | -0.03741 | 0.12216  | -0.99848 | 0.31940  | -0.02053 |
| 107 | C7 | DZZ | 0.03235  | 0.12498  | -0.95394 | 0.35207  | -0.08335 |
| 108 | C7 | DXY | 0.13214  | -0.07160 | 0.06478  | -0.14025 | -0.17312 |
| 109 | C7 | DXZ | 0.00000  | 0.00000  | 0.00000  | 0.00000  | 0.00000  |
| 110 | C7 | DYZ | 0.00000  | 0.00000  | 0.00000  | 0.00000  | 0.00000  |
| 111 | O1 | S   | -0.02841 | 0.30629  | -0.06192 | -0.00959 | -0.00992 |
| 112 | O1 | S   | -0.03270 | 0.42378  | -0.08973 | -0.08976 | 0.01571  |
| 113 | O1 | PX  | -0.00639 | 0.08651  | -0.01317 | 0.01191  | -0.00203 |

|     |    |     |          |          |          |          |          |
|-----|----|-----|----------|----------|----------|----------|----------|
| 114 | O1 | PY  | 0.00046  | -0.09221 | 0.02333  | 0.04070  | -0.01514 |
| 115 | O1 | PZ  | 0.00000  | 0.00000  | 0.00000  | 0.00000  | 0.00000  |
| 116 | O1 | S   | 0.38070  | -4.23414 | 0.86931  | 0.22036  | 0.14587  |
| 117 | O1 | PX  | -0.02031 | -0.44584 | 0.07920  | 0.24429  | -0.15917 |
| 118 | O1 | PY  | -0.13779 | 0.66237  | -0.16846 | -0.01482 | -0.09894 |
| 119 | O1 | PZ  | 0.00000  | 0.00000  | 0.00000  | 0.00000  | 0.00000  |
| 120 | O1 | DXX | -0.12156 | 0.96785  | -0.19648 | 0.13243  | -0.12787 |
| 121 | O1 | DYY | -0.03260 | 0.91864  | -0.17521 | -0.04367 | 0.00664  |
| 122 | O1 | DZZ | -0.10487 | 1.06392  | -0.21504 | -0.06098 | -0.02019 |
| 123 | O1 | DXY | -0.00791 | 0.02024  | -0.00147 | 0.07985  | -0.03983 |
| 124 | O1 | DXZ | 0.00000  | 0.00000  | 0.00000  | 0.00000  | 0.00000  |
| 125 | O1 | DYZ | 0.00000  | 0.00000  | 0.00000  | 0.00000  | 0.00000  |
| 126 | H4 | S   | 0.11225  | -0.05519 | 0.14563  | 0.17913  | 0.16749  |
| 127 | H4 | S   | -0.05679 | 0.35752  | -0.07228 | 0.04499  | -0.04546 |
| 128 | H4 | PX  | 0.06183  | -0.07908 | 0.10623  | 0.12439  | 0.13782  |
| 129 | H4 | PY  | -0.04155 | 0.03928  | -0.08104 | -0.12226 | -0.11381 |
| 130 | H4 | PZ  | 0.00000  | 0.00000  | 0.00000  | 0.00000  | 0.00000  |
| 131 | N1 | S   | 0.08354  | 0.32783  | -0.05731 | 0.19385  | -0.14160 |
| 132 | N1 | S   | -0.09199 | -0.05407 | 0.01567  | 0.16417  | 0.03845  |
| 133 | N1 | PX  | 0.05388  | 0.05722  | -0.02078 | -0.01759 | -0.05427 |
| 134 | N1 | PY  | 0.00816  | 0.09429  | -0.08550 | -0.03305 | 0.04110  |
| 135 | N1 | PZ  | 0.00000  | 0.00000  | 0.00000  | 0.00000  | 0.00000  |
| 136 | N1 | S   | -1.11517 | -5.37241 | 0.85244  | -4.06551 | 2.54112  |
| 137 | N1 | PX  | 0.02295  | -1.18051 | 0.27510  | -0.89350 | 0.40758  |
| 138 | N1 | PY  | -0.39299 | -0.81665 | -0.08781 | -0.82270 | 0.63645  |
| 139 | N1 | PZ  | 0.00000  | 0.00000  | 0.00000  | 0.00000  | 0.00000  |
| 140 | N1 | DXX | 0.36194  | 0.77167  | -0.13777 | 0.32614  | -0.46444 |
| 141 | N1 | DYY | 0.20741  | 0.91617  | -0.25795 | 0.34350  | -0.30390 |
| 142 | N1 | DZZ | 0.26257  | 1.05857  | -0.16806 | 0.66209  | -0.44761 |
| 143 | N1 | DXY | -0.03213 | 0.00383  | -0.05729 | 0.02178  | 0.08504  |
| 144 | N1 | DXZ | 0.00000  | 0.00000  | 0.00000  | 0.00000  | 0.00000  |
| 145 | N1 | DYZ | 0.00000  | 0.00000  | 0.00000  | 0.00000  | 0.00000  |
| 146 | H6 | S   | 0.19035  | -0.05189 | 0.01301  | -0.08547 | -0.23025 |
| 147 | H6 | S   | 0.00514  | 0.09539  | -0.03824 | 0.10716  | -0.08060 |
| 148 | H6 | PX  | 0.13605  | -0.06020 | 0.00213  | -0.11403 | -0.20134 |
| 149 | H6 | PY  | 0.03208  | -0.02882 | 0.00424  | -0.04167 | -0.06211 |
| 150 | H6 | PZ  | 0.00000  | 0.00000  | 0.00000  | 0.00000  | 0.00000  |
| 151 | C8 | S   | -0.15084 | 0.16390  | -0.02370 | 0.15775  | 0.11415  |
| 152 | C8 | S   | 0.91522  | -1.03423 | -0.00453 | -0.96729 | -0.62044 |
| 153 | C8 | PX  | 0.04814  | 0.02600  | 0.01005  | -0.01009 | 0.00131  |
| 154 | C8 | PY  | -0.10497 | 0.02947  | 0.21523  | -0.09822 | -0.08522 |
| 155 | C8 | PZ  | 0.00000  | 0.00000  | 0.00000  | 0.00000  | 0.00000  |
| 156 | C8 | S   | 0.93127  | 0.64352  | 0.06198  | 0.43864  | -1.37084 |
| 157 | C8 | PX  | 0.25139  | -1.56695 | 0.33203  | -0.98218 | 0.30543  |
| 158 | C8 | PY  | 0.54209  | 0.86153  | 0.03900  | 0.89092  | -0.73896 |
| 159 | C8 | PZ  | 0.00000  | 0.00000  | 0.00000  | 0.00000  | 0.00000  |
| 160 | C8 | DXX | -0.63862 | 0.57649  | -0.07013 | 0.67931  | 0.53040  |
| 161 | C8 | DYY | -0.51877 | 0.72134  | -0.10275 | 0.79495  | 0.55356  |
| 162 | C8 | DZZ | -0.58103 | 0.59326  | -0.05543 | 0.55504  | 0.40936  |
| 163 | C8 | DXY | 0.02656  | -0.03422 | 0.12713  | -0.08655 | -0.02481 |
| 164 | C8 | DXZ | 0.00000  | 0.00000  | 0.00000  | 0.00000  | 0.00000  |
| 165 | C8 | DYZ | 0.00000  | 0.00000  | 0.00000  | 0.00000  | 0.00000  |
| 166 | H8 | S   | -0.00180 | -0.12087 | 0.27993  | -0.16621 | 0.00298  |
| 167 | H8 | S   | -0.13230 | -0.23539 | -0.11884 | -0.20858 | 0.17791  |



|     |     |     |          |          |          |          |          |
|-----|-----|-----|----------|----------|----------|----------|----------|
| 168 | H8  | PX  | -0.02840 | 0.03460  | -0.26200 | 0.10948  | 0.04597  |
| 169 | H8  | PY  | -0.04558 | 0.03204  | 0.01786  | 0.02466  | 0.02014  |
| 170 | H8  | PZ  | 0.00000  | 0.00000  | 0.00000  | 0.00000  | 0.00000  |
| 171 | C10 | S   | -0.17145 | 0.11681  | 0.28615  | -0.10806 | -0.14820 |
| 172 | C10 | S   | 1.15690  | -0.88498 | -1.78566 | 0.61256  | 0.90562  |
| 173 | C10 | PX  | -0.02157 | 0.02057  | 0.00238  | 0.01321  | 0.01245  |
| 174 | C10 | PY  | 0.09383  | -0.16419 | -0.02108 | -0.11004 | -0.04015 |
| 175 | C10 | PZ  | 0.00000  | 0.00000  | 0.00000  | 0.00000  | 0.00000  |
| 176 | C10 | S   | 0.56679  | 0.36499  | -0.92199 | 0.98859  | 0.26158  |
| 177 | C10 | PX  | -0.12299 | 0.50031  | -0.14692 | 0.30103  | -0.08463 |
| 178 | C10 | PY  | 0.01449  | 0.38533  | -0.14687 | 0.30326  | -0.03250 |
| 179 | C10 | PZ  | 0.00000  | 0.00000  | 0.00000  | 0.00000  | 0.00000  |
| 180 | C10 | DXX | -0.78854 | 0.62460  | 1.32665  | -0.49590 | -0.76275 |
| 181 | C10 | DYY | -0.70612 | 0.44062  | 1.28688  | -0.61176 | -0.74012 |
| 182 | C10 | DZZ | -0.64096 | 0.42342  | 1.04785  | -0.37656 | -0.50747 |
| 183 | C10 | DXY | -0.01251 | 0.08550  | 0.04390  | 0.03826  | -0.00523 |
| 184 | C10 | DXZ | 0.00000  | 0.00000  | 0.00000  | 0.00000  | 0.00000  |
| 185 | C10 | DYZ | 0.00000  | 0.00000  | 0.00000  | 0.00000  | 0.00000  |
| 186 | H16 | S   | 0.14073  | -0.18207 | -0.19152 | 0.04038  | 0.15849  |
| 187 | H16 | S   | -0.05472 | -0.09818 | 0.20777  | -0.18720 | -0.04903 |
| 188 | H16 | PX  | -0.11586 | 0.08662  | 0.20409  | -0.09337 | -0.14652 |
| 189 | H16 | PY  | 0.02565  | -0.03635 | -0.06475 | 0.03210  | 0.05307  |
| 190 | H16 | PZ  | 0.00000  | 0.00000  | 0.00000  | 0.00000  | 0.00000  |
| 191 | H18 | S   | 0.11504  | -0.08872 | -0.25285 | 0.11579  | 0.13525  |
| 192 | H18 | S   | -0.14119 | 0.27903  | 0.08047  | 0.04618  | -0.10210 |
| 193 | H18 | PX  | 0.08603  | -0.06932 | -0.19088 | 0.07837  | 0.11056  |
| 194 | H18 | PY  | 0.06744  | -0.08711 | -0.14997 | 0.05747  | 0.10958  |
| 195 | H18 | PZ  | 0.00000  | 0.00000  | 0.00000  | 0.00000  | 0.00000  |
| 196 | C9  | S   | -0.00942 | 0.07415  | -0.05039 | -0.31279 | 0.13478  |
| 197 | C9  | S   | 0.02628  | -0.47960 | 0.30243  | 1.79162  | -0.75850 |
| 198 | C9  | PX  | -0.01958 | 0.00203  | -0.01503 | -0.00527 | -0.01631 |
| 199 | C9  | PY  | 0.00294  | -0.01282 | 0.00145  | 0.00964  | -0.00665 |
| 200 | C9  | PZ  | 0.00000  | 0.00000  | 0.00000  | 0.00000  | 0.00000  |
| 201 | C9  | S   | 0.03700  | 0.51542  | 0.04841  | 1.19174  | -0.53494 |
| 202 | C9  | PX  | -0.01943 | -0.22675 | 0.01835  | 0.05833  | -0.06863 |
| 203 | C9  | PY  | -0.05574 | -0.14440 | 0.02342  | -0.10667 | 0.06237  |
| 204 | C9  | PZ  | 0.00000  | 0.00000  | 0.00000  | 0.00000  | 0.00000  |
| 205 | C9  | DXX | -0.01334 | 0.17870  | -0.17734 | -1.28943 | 0.56455  |
| 206 | C9  | DYY | -0.02663 | 0.36710  | -0.21508 | -1.33828 | 0.58301  |
| 207 | C9  | DZZ | -0.04728 | 0.36473  | -0.24007 | -1.36087 | 0.56716  |
| 208 | C9  | DXY | 0.02284  | -0.03469 | 0.02382  | 0.04139  | -0.00065 |
| 209 | C9  | DXZ | 0.00000  | 0.00000  | 0.00000  | 0.00000  | 0.00000  |
| 210 | C9  | DYZ | 0.00000  | 0.00000  | 0.00000  | 0.00000  | 0.00000  |
| 211 | H3  | S   | 0.01234  | -0.12238 | 0.04237  | 0.20883  | -0.09203 |
| 212 | H3  | S   | 0.02296  | -0.01248 | -0.02796 | -0.16867 | 0.06123  |
| 213 | H3  | PX  | 0.00101  | -0.02439 | 0.00955  | 0.04760  | -0.02109 |
| 214 | H3  | PY  | -0.00907 | 0.07541  | -0.03427 | -0.21223 | 0.09395  |
| 215 | H3  | PZ  | 0.00000  | 0.00000  | 0.00000  | 0.00000  | 0.00000  |
| 216 | H5  | S   | 0.00165  | -0.11447 | 0.04554  | 0.17447  | -0.07017 |
| 217 | H5  | S   | 0.00925  | -0.03190 | -0.00912 | -0.24676 | 0.13651  |
| 218 | H5  | PX  | -0.00526 | 0.04561  | -0.02418 | -0.11078 | 0.04381  |
| 219 | H5  | PY  | 0.00700  | -0.00144 | 0.01160  | 0.07179  | -0.02718 |
| 220 | H5  | PZ  | 0.01224  | -0.04430 | 0.03577  | 0.16701  | -0.05924 |
| 221 | H7  | S   | 0.00165  | -0.11447 | 0.04554  | 0.17447  | -0.07017 |

|     |    |    |          |          |          |          |          |
|-----|----|----|----------|----------|----------|----------|----------|
| 222 | H7 | S  | 0.00925  | -0.03190 | -0.00912 | -0.24676 | 0.13651  |
| 223 | H7 | PX | -0.00526 | 0.04561  | -0.02418 | -0.11078 | 0.04381  |
| 224 | H7 | PY | 0.00700  | -0.00144 | 0.01160  | 0.07179  | -0.02718 |
| 225 | H7 | PZ | -0.01224 | 0.04430  | -0.03577 | -0.16701 | 0.05924  |

|              |  |           |           |           |           |         |
|--------------|--|-----------|-----------|-----------|-----------|---------|
| MO:          |  | 221       | 222       | 223       | 224       | 225     |
| Eigenvalues: |  | 4.89251   | 4.92769   | 5.06080   | 5.28515   | 0.00000 |
| (ev):        |  | 133.13204 | 134.08936 | 137.71148 | 143.81642 | 0.00000 |

|    |    |     |          |          |          |          |         |
|----|----|-----|----------|----------|----------|----------|---------|
|    |    | A   | A        | A        | A        | A        |         |
| 1  | H1 | S   | 0.09346  | -0.06041 | 0.06639  | -0.21002 | 0.00000 |
| 2  | H1 | S   | 0.04702  | -0.10299 | -0.11770 | 0.05064  | 0.00000 |
| 3  | H1 | PX  | -0.10617 | 0.01232  | -0.07722 | 0.21722  | 0.00000 |
| 4  | H1 | PY  | -0.06427 | 0.00144  | -0.03359 | 0.06089  | 0.00000 |
| 5  | H1 | PZ  | 0.00000  | 0.00000  | 0.00000  | 0.00000  | 0.00000 |
| 6  | C1 | S   | -0.08281 | 0.03569  | -0.04754 | 0.17578  | 0.00000 |
| 7  | C1 | S   | 0.47862  | -0.12461 | 0.36196  | -1.08680 | 0.00000 |
| 8  | C1 | PX  | -0.00939 | -0.15496 | 0.06027  | -0.08382 | 0.00000 |
| 9  | C1 | PY  | -0.04214 | 0.15465  | -0.12731 | -0.03084 | 0.00000 |
| 10 | C1 | PZ  | 0.00000  | 0.00000  | 0.00000  | 0.00000  | 0.00000 |
| 11 | C1 | S   | -0.33368 | -0.88738 | -0.35963 | -0.77295 | 0.00000 |
| 12 | C1 | PX  | -0.18921 | 0.38004  | 0.32227  | 0.26037  | 0.00000 |
| 13 | C1 | PY  | 1.04042  | 0.80883  | 0.02492  | -0.11260 | 0.00000 |
| 14 | C1 | PZ  | 0.00000  | 0.00000  | 0.00000  | 0.00000  | 0.00000 |
| 15 | C1 | DXX | -0.42772 | 0.25985  | -0.39589 | 1.00996  | 0.00000 |
| 16 | C1 | DYY | -0.32503 | 0.17235  | -0.23743 | 1.06417  | 0.00000 |
| 17 | C1 | DZZ | -0.30377 | 0.11503  | -0.16049 | 0.57514  | 0.00000 |
| 18 | C1 | DXY | -0.07650 | -0.20896 | 0.09998  | 0.02774  | 0.00000 |
| 19 | C1 | DXZ | 0.00000  | 0.00000  | 0.00000  | 0.00000  | 0.00000 |
| 20 | C1 | DYZ | 0.00000  | 0.00000  | 0.00000  | 0.00000  | 0.00000 |
| 21 | C2 | S   | -0.02437 | 0.19802  | 0.12539  | -0.12073 | 0.00000 |
| 22 | C2 | S   | 0.42765  | -0.96543 | -0.80088 | 0.78448  | 0.00000 |
| 23 | C2 | PX  | -0.04067 | 0.02161  | -0.01137 | -0.04662 | 0.00000 |
| 24 | C2 | PY  | 0.09087  | 0.00956  | 0.09658  | -0.04038 | 0.00000 |
| 25 | C2 | PZ  | 0.00000  | 0.00000  | 0.00000  | 0.00000  | 0.00000 |
| 26 | C2 | S   | -0.23847 | -1.25845 | -0.49613 | 0.54674  | 0.00000 |
| 27 | C2 | PX  | -0.20649 | -0.59415 | 0.10130  | 0.13753  | 0.00000 |
| 28 | C2 | PY  | 0.11268  | 0.00428  | 0.11199  | 0.49312  | 0.00000 |
| 29 | C2 | PZ  | 0.00000  | 0.00000  | 0.00000  | 0.00000  | 0.00000 |
| 30 | C2 | DXX | -0.26847 | 0.91708  | 0.72894  | -0.70034 | 0.00000 |
| 31 | C2 | DYY | -0.28255 | 0.73894  | 0.68465  | -0.75367 | 0.00000 |
| 32 | C2 | DZZ | -0.09857 | 0.71030  | 0.41462  | -0.39118 | 0.00000 |
| 33 | C2 | DXY | 0.15299  | 0.07508  | 0.08880  | 0.02072  | 0.00000 |
| 34 | C2 | DXZ | 0.00000  | 0.00000  | 0.00000  | 0.00000  | 0.00000 |
| 35 | C2 | DYZ | 0.00000  | 0.00000  | 0.00000  | 0.00000  | 0.00000 |
| 36 | C3 | S   | -0.00106 | 0.11886  | -0.05102 | -0.23896 | 0.00000 |
| 37 | C3 | S   | -0.06705 | -0.68532 | 0.14849  | 1.31333  | 0.00000 |
| 38 | C3 | PX  | 0.02836  | -0.06362 | -0.05113 | -0.04128 | 0.00000 |
| 39 | C3 | PY  | 0.05840  | 0.03274  | 0.10010  | 0.11990  | 0.00000 |
| 40 | C3 | PZ  | 0.00000  | 0.00000  | 0.00000  | 0.00000  | 0.00000 |
| 41 | C3 | S   | 1.92839  | 0.77741  | 0.98672  | 3.54694  | 0.00000 |
| 42 | C3 | PX  | 0.92653  | 1.15505  | -0.61171 | -0.45155 | 0.00000 |
| 43 | C3 | PY  | 0.01278  | -0.58529 | 0.44803  | -1.49973 | 0.00000 |
| 44 | C3 | PZ  | 0.00000  | 0.00000  | 0.00000  | 0.00000  | 0.00000 |

|    |    |     |          |          |          |          |         |
|----|----|-----|----------|----------|----------|----------|---------|
| 45 | C3 | DXX | -0.11252 | 0.49300  | -0.11666 | -0.99628 | 0.00000 |
| 46 | C3 | DYY | 0.11879  | 0.54992  | -0.32746 | -1.42173 | 0.00000 |
| 47 | C3 | DZZ | 0.00964  | 0.45045  | -0.16608 | -0.80478 | 0.00000 |
| 48 | C3 | DXY | -0.09812 | -0.02578 | 0.06662  | 0.00518  | 0.00000 |
| 49 | C3 | DXZ | 0.00000  | 0.00000  | 0.00000  | 0.00000  | 0.00000 |
| 50 | C3 | DYZ | 0.00000  | 0.00000  | 0.00000  | 0.00000  | 0.00000 |
| 51 | C4 | S   | -0.05296 | -0.33158 | 0.15541  | -0.16242 | 0.00000 |
| 52 | C4 | S   | 0.08884  | 1.70011  | -0.98668 | 0.96792  | 0.00000 |
| 53 | C4 | PX  | -0.00730 | -0.07317 | 0.02185  | -0.07101 | 0.00000 |
| 54 | C4 | PY  | -0.01102 | -0.03980 | -0.00560 | 0.03009  | 0.00000 |
| 55 | C4 | PZ  | 0.00000  | 0.00000  | 0.00000  | 0.00000  | 0.00000 |
| 56 | C4 | S   | -1.70585 | -0.41176 | -0.24861 | 0.79490  | 0.00000 |
| 57 | C4 | PX  | -0.03679 | -0.35053 | 0.32155  | 0.01884  | 0.00000 |
| 58 | C4 | PY  | -1.32242 | -2.80458 | 0.27834  | -0.64663 | 0.00000 |
| 59 | C4 | PZ  | 0.00000  | 0.00000  | 0.00000  | 0.00000  | 0.00000 |
| 60 | C4 | DXX | -0.14618 | -1.39938 | 0.82027  | -0.89523 | 0.00000 |
| 61 | C4 | DYY | -0.07287 | -1.52755 | 0.85078  | -0.92386 | 0.00000 |
| 62 | C4 | DZZ | -0.14875 | -1.09457 | 0.52801  | -0.51989 | 0.00000 |
| 63 | C4 | DXY | -0.09316 | 0.05196  | -0.05459 | 0.08533  | 0.00000 |
| 64 | C4 | DXZ | 0.00000  | 0.00000  | 0.00000  | 0.00000  | 0.00000 |
| 65 | C4 | DYZ | 0.00000  | 0.00000  | 0.00000  | 0.00000  | 0.00000 |
| 66 | C5 | S   | -0.07279 | -0.00762 | -0.16721 | 0.11891  | 0.00000 |
| 67 | C5 | S   | 0.24223  | -0.04684 | 1.00836  | -0.76651 | 0.00000 |
| 68 | C5 | PX  | -0.00013 | 0.12863  | 0.02194  | -0.01775 | 0.00000 |
| 69 | C5 | PY  | 0.02754  | 0.11305  | 0.06007  | -0.05061 | 0.00000 |
| 70 | C5 | PZ  | 0.00000  | 0.00000  | 0.00000  | 0.00000  | 0.00000 |
| 71 | C5 | S   | 0.64915  | -0.08422 | 0.89446  | -1.09936 | 0.00000 |
| 72 | C5 | PX  | 0.31477  | -0.20223 | 0.23080  | -0.03810 | 0.00000 |
| 73 | C5 | PY  | -0.13743 | 0.21329  | -0.08945 | 0.27026  | 0.00000 |
| 74 | C5 | PZ  | 0.00000  | 0.00000  | 0.00000  | 0.00000  | 0.00000 |
| 75 | C5 | DXX | -0.18161 | 0.12279  | -0.83276 | 0.68019  | 0.00000 |
| 76 | C5 | DYY | -0.22224 | -0.13890 | -0.91561 | 0.72201  | 0.00000 |
| 77 | C5 | DZZ | -0.25735 | 0.00963  | -0.57765 | 0.38957  | 0.00000 |
| 78 | C5 | DXY | 0.07328  | 0.19239  | 0.00689  | 0.03912  | 0.00000 |
| 79 | C5 | DXZ | 0.00000  | 0.00000  | 0.00000  | 0.00000  | 0.00000 |
| 80 | C5 | DYZ | 0.00000  | 0.00000  | 0.00000  | 0.00000  | 0.00000 |
| 81 | C6 | S   | 0.21712  | -0.10956 | -0.02869 | 0.17258  | 0.00000 |
| 82 | C6 | S   | -1.30622 | 0.67355  | 0.33600  | -0.94616 | 0.00000 |
| 83 | C6 | PX  | 0.01006  | 0.02866  | 0.05497  | 0.03664  | 0.00000 |
| 84 | C6 | PY  | -0.00620 | 0.05163  | 0.05234  | -0.03197 | 0.00000 |
| 85 | C6 | PZ  | 0.00000  | 0.00000  | 0.00000  | 0.00000  | 0.00000 |
| 86 | C6 | S   | 1.61407  | 2.29136  | 0.20874  | -1.58260 | 0.00000 |
| 87 | C6 | PX  | -0.12085 | -0.00564 | -0.44926 | -1.27490 | 0.00000 |
| 88 | C6 | PY  | -1.38513 | -0.04505 | -0.87342 | -0.11920 | 0.00000 |
| 89 | C6 | PZ  | 0.00000  | 0.00000  | 0.00000  | 0.00000  | 0.00000 |
| 90 | C6 | DXX | 0.94364  | -0.54792 | -0.19026 | 0.85472  | 0.00000 |
| 91 | C6 | DYY | 1.03417  | -0.58832 | -0.33861 | 0.85364  | 0.00000 |
| 92 | C6 | DZZ | 0.76754  | -0.38966 | -0.10778 | 0.58259  | 0.00000 |
| 93 | C6 | DXY | -0.09342 | 0.03984  | 0.02196  | -0.07114 | 0.00000 |
| 94 | C6 | DXZ | 0.00000  | 0.00000  | 0.00000  | 0.00000  | 0.00000 |
| 95 | C6 | DYZ | 0.00000  | 0.00000  | 0.00000  | 0.00000  | 0.00000 |
| 96 | C7 | S   | 0.04941  | 0.03224  | 0.22165  | 0.19696  | 0.00000 |
| 97 | C7 | S   | -0.01281 | 0.00915  | -1.37657 | -0.88369 | 0.00000 |
| 98 | C7 | PX  | 0.04173  | 0.03952  | -0.00831 | -0.06528 | 0.00000 |

|     |    |     |          |          |          |          |         |
|-----|----|-----|----------|----------|----------|----------|---------|
| 99  | C7 | PY  | 0.02768  | -0.08473 | -0.00666 | 0.11046  | 0.00000 |
| 100 | C7 | PZ  | 0.00000  | 0.00000  | 0.00000  | 0.00000  | 0.00000 |
| 101 | C7 | S   | -1.74996 | -1.71308 | -0.94904 | -3.34480 | 0.00000 |
| 102 | C7 | PX  | 1.04456  | 0.78614  | 0.34438  | 1.50370  | 0.00000 |
| 103 | C7 | PY  | -0.67554 | -0.57788 | 0.26874  | -0.07256 | 0.00000 |
| 104 | C7 | PZ  | 0.00000  | 0.00000  | 0.00000  | 0.00000  | 0.00000 |
| 105 | C7 | DXX | 0.05693  | 0.01688  | 1.31150  | 1.13803  | 0.00000 |
| 106 | C7 | DYY | 0.02234  | -0.00773 | 0.97939  | 0.80039  | 0.00000 |
| 107 | C7 | DZZ | 0.16890  | 0.10434  | 0.77049  | 0.62722  | 0.00000 |
| 108 | C7 | DXY | -0.06143 | 0.05737  | 0.03050  | -0.14478 | 0.00000 |
| 109 | C7 | DXZ | 0.00000  | 0.00000  | 0.00000  | 0.00000  | 0.00000 |
| 110 | C7 | DYZ | 0.00000  | 0.00000  | 0.00000  | 0.00000  | 0.00000 |
| 111 | O1 | S   | -0.29479 | -0.31360 | 0.00288  | -0.00679 | 0.00000 |
| 112 | O1 | S   | -0.40830 | -0.72873 | 0.12183  | -0.13395 | 0.00000 |
| 113 | O1 | PX  | -0.09187 | -0.05487 | -0.00493 | 0.00594  | 0.00000 |
| 114 | O1 | PY  | 0.07987  | 0.03579  | 0.03988  | -0.04355 | 0.00000 |
| 115 | O1 | PZ  | 0.00000  | 0.00000  | 0.00000  | 0.00000  | 0.00000 |
| 116 | O1 | S   | 4.30221  | 5.26465  | -0.30448 | 0.43167  | 0.00000 |
| 117 | O1 | PX  | 0.10611  | 0.26452  | -0.05632 | -0.02207 | 0.00000 |
| 118 | O1 | PY  | -0.86678 | -1.44792 | 0.27550  | -0.35403 | 0.00000 |
| 119 | O1 | PZ  | 0.00000  | 0.00000  | 0.00000  | 0.00000  | 0.00000 |
| 120 | O1 | DXX | -1.16238 | -0.99111 | -0.05036 | 0.00698  | 0.00000 |
| 121 | O1 | DYY | -0.86669 | -0.50778 | -0.21346 | 0.22990  | 0.00000 |
| 122 | O1 | DZZ | -0.96421 | -1.17050 | 0.07947  | -0.09158 | 0.00000 |
| 123 | O1 | DXY | -0.12945 | 0.08457  | -0.06473 | 0.04718  | 0.00000 |
| 124 | O1 | DXZ | 0.00000  | 0.00000  | 0.00000  | 0.00000  | 0.00000 |
| 125 | O1 | DYZ | 0.00000  | 0.00000  | 0.00000  | 0.00000  | 0.00000 |
| 126 | H4 | S   | 0.08071  | 0.07338  | 0.18114  | -0.12123 | 0.00000 |
| 127 | H4 | S   | 0.02883  | -0.11161 | -0.02750 | 0.05060  | 0.00000 |
| 128 | H4 | PX  | 0.04064  | 0.07618  | 0.13890  | -0.10360 | 0.00000 |
| 129 | H4 | PY  | -0.00147 | -0.03597 | -0.13509 | 0.10492  | 0.00000 |
| 130 | H4 | PZ  | 0.00000  | 0.00000  | 0.00000  | 0.00000  | 0.00000 |
| 131 | N1 | S   | 0.21093  | 0.14726  | 0.09760  | -0.00031 | 0.00000 |
| 132 | N1 | S   | 0.17583  | -0.02917 | -0.13189 | -0.00016 | 0.00000 |
| 133 | N1 | PX  | -0.02006 | 0.07564  | 0.10082  | -0.01716 | 0.00000 |
| 134 | N1 | PY  | -0.06514 | 0.11983  | 0.08081  | -0.08267 | 0.00000 |
| 135 | N1 | PZ  | 0.00000  | 0.00000  | 0.00000  | 0.00000  | 0.00000 |
| 136 | N1 | S   | -4.42498 | -2.30867 | -1.49012 | -0.11350 | 0.00000 |
| 137 | N1 | PX  | -0.94960 | -0.44646 | 0.03209  | 0.16656  | 0.00000 |
| 138 | N1 | PY  | -1.01870 | -0.39475 | -0.41104 | -0.35322 | 0.00000 |
| 139 | N1 | PZ  | 0.00000  | 0.00000  | 0.00000  | 0.00000  | 0.00000 |
| 140 | N1 | DXX | 0.39911  | 0.46477  | 0.50419  | 0.04735  | 0.00000 |
| 141 | N1 | DYY | 0.32443  | 0.50624  | 0.38808  | -0.16000 | 0.00000 |
| 142 | N1 | DZZ | 0.72498  | 0.42907  | 0.23110  | 0.02707  | 0.00000 |
| 143 | N1 | DXY | -0.02206 | -0.00108 | -0.03864 | -0.04840 | 0.00000 |
| 144 | N1 | DXZ | 0.00000  | 0.00000  | 0.00000  | 0.00000  | 0.00000 |
| 145 | N1 | DYZ | 0.00000  | 0.00000  | 0.00000  | 0.00000  | 0.00000 |
| 146 | H6 | S   | 0.03335  | -0.20908 | -0.15992 | 0.16014  | 0.00000 |
| 147 | H6 | S   | -0.08007 | -0.09102 | 0.13545  | 0.00762  | 0.00000 |
| 148 | H6 | PX  | 0.01559  | -0.19285 | -0.17869 | 0.14517  | 0.00000 |
| 149 | H6 | PY  | 0.02045  | -0.05205 | -0.05673 | 0.04058  | 0.00000 |
| 150 | H6 | PZ  | 0.00000  | 0.00000  | 0.00000  | 0.00000  | 0.00000 |
| 151 | C8 | S   | 0.11536  | -0.03803 | -0.22898 | -0.12074 | 0.00000 |
| 152 | C8 | S   | -0.80719 | 0.18561  | 1.43806  | 0.61520  | 0.00000 |

|     |     |     |          |          |          |          |         |
|-----|-----|-----|----------|----------|----------|----------|---------|
| 153 | C8  | PX  | 0.00518  | 0.03596  | -0.02563 | -0.02623 | 0.00000 |
| 154 | C8  | PY  | -0.05986 | 0.02921  | 0.07084  | 0.01051  | 0.00000 |
| 155 | C8  | PZ  | 0.00000  | 0.00000  | 0.00000  | 0.00000  | 0.00000 |
| 156 | C8  | S   | 0.84140  | 1.04860  | 1.47076  | 1.45934  | 0.00000 |
| 157 | C8  | PX  | -1.02884 | -0.44385 | 0.16645  | 0.53095  | 0.00000 |
| 158 | C8  | PY  | 1.49287  | 0.72345  | 0.32873  | 1.14297  | 0.00000 |
| 159 | C8  | PZ  | 0.00000  | 0.00000  | 0.00000  | 0.00000  | 0.00000 |
| 160 | C8  | DXX | 0.51150  | -0.22073 | -1.07312 | -0.45797 | 0.00000 |
| 161 | C8  | DYY | 0.66431  | -0.16036 | -1.34656 | -0.69701 | 0.00000 |
| 162 | C8  | DZZ | 0.40703  | -0.13816 | -0.80498 | -0.39763 | 0.00000 |
| 163 | C8  | DXY | -0.04165 | 0.04173  | -0.00788 | -0.02217 | 0.00000 |
| 164 | C8  | DXZ | 0.00000  | 0.00000  | 0.00000  | 0.00000  | 0.00000 |
| 165 | C8  | DYZ | 0.00000  | 0.00000  | 0.00000  | 0.00000  | 0.00000 |
| 166 | H8  | S   | -0.05397 | -0.00950 | -0.30967 | -0.30024 | 0.00000 |
| 167 | H8  | S   | -0.27934 | -0.18689 | 0.02933  | -0.25497 | 0.00000 |
| 168 | H8  | PX  | 0.00846  | -0.00669 | 0.29606  | 0.28165  | 0.00000 |
| 169 | H8  | PY  | 0.04348  | 0.02889  | -0.04631 | -0.01240 | 0.00000 |
| 170 | H8  | PZ  | 0.00000  | 0.00000  | 0.00000  | 0.00000  | 0.00000 |
| 171 | C10 | S   | -0.02941 | 0.06726  | 0.14305  | 0.05454  | 0.00000 |
| 172 | C10 | S   | 0.13818  | -0.40920 | -0.82223 | -0.26165 | 0.00000 |
| 173 | C10 | PX  | 0.01247  | 0.00586  | -0.03342 | -0.01735 | 0.00000 |
| 174 | C10 | PY  | -0.09568 | 0.00428  | 0.17395  | 0.12645  | 0.00000 |
| 175 | C10 | PZ  | 0.00000  | 0.00000  | 0.00000  | 0.00000  | 0.00000 |
| 176 | C10 | S   | 1.05459  | 0.06772  | -0.61864 | 0.14606  | 0.00000 |
| 177 | C10 | PX  | 0.21109  | 0.02124  | -0.00649 | -0.27023 | 0.00000 |
| 178 | C10 | PY  | 0.33826  | 0.05003  | -0.07421 | 0.01936  | 0.00000 |
| 179 | C10 | PZ  | 0.00000  | 0.00000  | 0.00000  | 0.00000  | 0.00000 |
| 180 | C10 | DXX | -0.11395 | 0.35014  | 0.76414  | 0.29009  | 0.00000 |
| 181 | C10 | DYY | -0.25076 | 0.32313  | 0.86239  | 0.34212  | 0.00000 |
| 182 | C10 | DZZ | -0.09171 | 0.22821  | 0.45047  | 0.16389  | 0.00000 |
| 183 | C10 | DXY | 0.06360  | 0.03468  | -0.09010 | -0.08222 | 0.00000 |
| 184 | C10 | DXZ | 0.00000  | 0.00000  | 0.00000  | 0.00000  | 0.00000 |
| 185 | C10 | DYZ | 0.00000  | 0.00000  | 0.00000  | 0.00000  | 0.00000 |
| 186 | H16 | S   | -0.01345 | -0.05988 | -0.17128 | -0.05348 | 0.00000 |
| 187 | H16 | S   | -0.13817 | 0.00955  | 0.09842  | 0.10513  | 0.00000 |
| 188 | H16 | PX  | -0.02980 | 0.06282  | 0.17986  | 0.08230  | 0.00000 |
| 189 | H16 | PY  | 0.00684  | -0.02542 | -0.05895 | -0.02022 | 0.00000 |
| 190 | H16 | PZ  | 0.00000  | 0.00000  | 0.00000  | 0.00000  | 0.00000 |
| 191 | H18 | S   | 0.02688  | -0.08358 | -0.12739 | -0.05548 | 0.00000 |
| 192 | H18 | S   | 0.03786  | 0.03155  | 0.08875  | -0.06606 | 0.00000 |
| 193 | H18 | PX  | 0.01532  | -0.05952 | -0.10154 | -0.03501 | 0.00000 |
| 194 | H18 | PY  | 0.00276  | -0.05858 | -0.10774 | -0.02983 | 0.00000 |
| 195 | H18 | PZ  | 0.00000  | 0.00000  | 0.00000  | 0.00000  | 0.00000 |
| 196 | C9  | S   | 0.29822  | -0.10087 | 0.07642  | -0.03611 | 0.00000 |
| 197 | C9  | S   | -1.62497 | 0.65390  | -0.42883 | 0.19492  | 0.00000 |
| 198 | C9  | PX  | -0.00664 | 0.03848  | -0.03491 | 0.02533  | 0.00000 |
| 199 | C9  | PY  | -0.00924 | 0.00335  | -0.00482 | 0.00743  | 0.00000 |
| 200 | C9  | PZ  | 0.00000  | 0.00000  | 0.00000  | 0.00000  | 0.00000 |
| 201 | C9  | S   | -1.91832 | -0.24309 | -0.35666 | 0.20795  | 0.00000 |
| 202 | C9  | PX  | 0.07457  | 0.09937  | 0.00461  | -0.04599 | 0.00000 |
| 203 | C9  | PY  | 0.39597  | 0.22999  | 0.01075  | -0.01508 | 0.00000 |
| 204 | C9  | PZ  | 0.00000  | 0.00000  | 0.00000  | 0.00000  | 0.00000 |
| 205 | C9  | DXX | 1.36754  | -0.34854 | 0.35046  | -0.17750 | 0.00000 |
| 206 | C9  | DYY | 1.22742  | -0.52374 | 0.34758  | -0.17139 | 0.00000 |

|     |    |     |          |          |          |          |         |
|-----|----|-----|----------|----------|----------|----------|---------|
| 207 | C9 | DZZ | 1.22523  | -0.45998 | 0.30688  | -0.14085 | 0.00000 |
| 208 | C9 | DXY | -0.00551 | 0.02695  | 0.00728  | -0.00537 | 0.00000 |
| 209 | C9 | DXZ | 0.00000  | 0.00000  | 0.00000  | 0.00000  | 0.00000 |
| 210 | C9 | DYZ | 0.00000  | 0.00000  | 0.00000  | 0.00000  | 0.00000 |
| 211 | H3 | S   | -0.14699 | 0.13096  | -0.05146 | 0.02488  | 0.00000 |
| 212 | H3 | S   | 0.13980  | -0.05010 | 0.03971  | -0.01266 | 0.00000 |
| 213 | H3 | PX  | -0.03433 | 0.00266  | -0.00059 | -0.00429 | 0.00000 |
| 214 | H3 | PY  | 0.18446  | -0.12806 | 0.07016  | -0.04185 | 0.00000 |
| 215 | H3 | PZ  | 0.00000  | 0.00000  | 0.00000  | 0.00000  | 0.00000 |
| 216 | H5 | S   | -0.06975 | 0.12650  | -0.03607 | 0.01048  | 0.00000 |
| 217 | H5 | S   | 0.34042  | 0.02561  | 0.07178  | -0.01627 | 0.00000 |
| 218 | H5 | PX  | 0.08325  | -0.03232 | 0.01390  | -0.00241 | 0.00000 |
| 219 | H5 | PY  | -0.08522 | -0.00953 | -0.00871 | 0.00298  | 0.00000 |
| 220 | H5 | PZ  | -0.14281 | 0.06738  | -0.03657 | 0.02290  | 0.00000 |
| 221 | H7 | S   | -0.06975 | 0.12650  | -0.03607 | 0.01048  | 0.00000 |
| 222 | H7 | S   | 0.34042  | 0.02561  | 0.07178  | -0.01627 | 0.00000 |
| 223 | H7 | PX  | 0.08325  | -0.03232 | 0.01390  | -0.00241 | 0.00000 |
| 224 | H7 | PY  | -0.08522 | -0.00953 | -0.00871 | 0.00298  | 0.00000 |
| 225 | H7 | PZ  | 0.14281  | -0.06738 | 0.03657  | -0.02290 | 0.00000 |

#### Atomic Charges from Electrostatic Potential

Resolution: 1 points per atomic unit

6944 of 17955 gridpoints used in calculation

| Atom | Charge    |
|------|-----------|
| ---- | -----     |
| H 1  | 0.226432  |
| C 2  | -0.509826 |
| C 3  | -0.264623 |
| C 4  | 0.121883  |
| C 5  | 0.493478  |
| C 6  | -0.265125 |
| C 7  | 0.527383  |
| C 8  | -0.465662 |
| O 9  | -0.396296 |
| H 10 | 0.176234  |
| N 11 | -0.694921 |
| H 12 | 0.181634  |
| C 13 | 0.514887  |
| H 14 | 0.214387  |
| C 15 | -0.475365 |
| H 16 | 0.182448  |
| H 17 | 0.213304  |
| C 18 | 0.059467  |
| H 19 | 0.080931  |
| H 20 | 0.039674  |
| H 21 | 0.039674  |

Total Charge = 0.000000

RMS fit: 1.308314  
RRMS fit: 0.179095

Dipole moment from formal charges:

x = 2.6372, y = 1.7305, z = 0.0000 = 3.1543 debye

Q-minus(elesta) = -0.6949

Q-plus(elesta) = 0.2264

#### Mulliken Population Analysis

| AO | atom type |      | Occupancy |
|----|-----------|------|-----------|
| -- | ----      | ---- | -----     |
| 1  | H1        | S    | 0.532517  |
| 2  | H1        | S    | 0.298367  |
| 3  | H1        | PX   | 0.009181  |
| 4  | H1        | PY   | 0.002289  |
| 5  | H1        | PZ   | 0.003103  |
| 6  | C1        | S    | 1.996405  |
| 7  | C1        | S    | 0.655863  |
| 8  | C1        | PX   | 0.726659  |
| 9  | C1        | PY   | 0.716440  |
| 10 | C1        | PZ   | 0.597250  |
| 11 | C1        | S    | 0.437520  |
| 12 | C1        | PX   | 0.278377  |
| 13 | C1        | PY   | 0.218376  |
| 14 | C1        | PZ   | 0.530178  |
| 15 | C1        | DXX  | 0.018328  |
| 16 | C1        | DYY  | 0.019897  |
| 17 | C1        | DZZ  | -0.017491 |
| 18 | C1        | DXY  | 0.014336  |
| 19 | C1        | DXZ  | 0.005073  |
| 20 | C1        | DYZ  | 0.005884  |
| 21 | C2        | S    | 1.996577  |
| 22 | C2        | S    | 0.674998  |
| 23 | C2        | PX   | 0.724961  |
| 24 | C2        | PY   | 0.759276  |
| 25 | C2        | PZ   | 0.518959  |
| 26 | C2        | S    | 0.465593  |
| 27 | C2        | PX   | 0.301499  |
| 28 | C2        | PY   | 0.165506  |
| 29 | C2        | PZ   | 0.450104  |
| 30 | C2        | DXX  | 0.017019  |
| 31 | C2        | DYY  | 0.020276  |
| 32 | C2        | DZZ  | -0.018189 |
| 33 | C2        | DXY  | 0.016380  |
| 34 | C2        | DXZ  | 0.002249  |
| 35 | C2        | DYZ  | 0.008470  |
| 36 | C3        | S    | 1.996663  |
| 37 | C3        | S    | 0.673620  |

|    |    |     |           |
|----|----|-----|-----------|
| 38 | C3 | PX  | 0.721380  |
| 39 | C3 | PY  | 0.755201  |
| 40 | C3 | PZ  | 0.534254  |
| 41 | C3 | S   | 0.433570  |
| 42 | C3 | PX  | 0.211720  |
| 43 | C3 | PY  | 0.230966  |
| 44 | C3 | PZ  | 0.451643  |
| 45 | C3 | DXX | 0.017682  |
| 46 | C3 | DYY | 0.031068  |
| 47 | C3 | DZZ | -0.017546 |
| 48 | C3 | DXY | 0.014666  |
| 49 | C3 | DXZ | 0.004221  |
| 50 | C3 | DYZ | 0.011640  |
| 51 | C4 | S   | 1.996668  |
| 52 | C4 | S   | 0.679027  |
| 53 | C4 | PX  | 0.774123  |
| 54 | C4 | PY  | 0.627839  |
| 55 | C4 | PZ  | 0.520384  |
| 56 | C4 | S   | 0.341095  |
| 57 | C4 | PX  | 0.142984  |
| 58 | C4 | PY  | 0.030891  |
| 59 | C4 | PZ  | 0.386812  |
| 60 | C4 | DXX | 0.024767  |
| 61 | C4 | DYY | 0.031904  |
| 62 | C4 | DZZ | -0.020395 |
| 63 | C4 | DXY | 0.022756  |
| 64 | C4 | DXZ | 0.008435  |
| 65 | C4 | DYZ | 0.019842  |
| 66 | C5 | S   | 1.996586  |
| 67 | C5 | S   | 0.674449  |
| 68 | C5 | PX  | 0.703647  |
| 69 | C5 | PY  | 0.772905  |
| 70 | C5 | PZ  | 0.515694  |
| 71 | C5 | S   | 0.505642  |
| 72 | C5 | PX  | 0.252806  |
| 73 | C5 | PY  | 0.246684  |
| 74 | C5 | PZ  | 0.461436  |
| 75 | C5 | DXX | 0.016760  |
| 76 | C5 | DYY | 0.021398  |
| 77 | C5 | DZZ | -0.018695 |
| 78 | C5 | DXY | 0.015684  |
| 79 | C5 | DXZ | 0.003175  |
| 80 | C5 | DYZ | 0.007607  |
| 81 | C6 | S   | 1.996714  |
| 82 | C6 | S   | 0.692307  |
| 83 | C6 | PX  | 0.727693  |
| 84 | C6 | PY  | 0.750531  |
| 85 | C6 | PZ  | 0.487710  |
| 86 | C6 | S   | 0.343431  |
| 87 | C6 | PX  | 0.190641  |
| 88 | C6 | PY  | 0.130764  |
| 89 | C6 | PZ  | 0.371023  |
| 90 | C6 | DXX | 0.020123  |
| 91 | C6 | DYY | 0.030987  |



|     |    |     |           |
|-----|----|-----|-----------|
| 92  | C6 | DZZ | -0.019967 |
| 93  | C6 | DXY | 0.030036  |
| 94  | C6 | DXZ | 0.005444  |
| 95  | C6 | DYZ | 0.016082  |
| 96  | C7 | S   | 1.996657  |
| 97  | C7 | S   | 0.670549  |
| 98  | C7 | PX  | 0.728845  |
| 99  | C7 | PY  | 0.733341  |
| 100 | C7 | PZ  | 0.536088  |
| 101 | C7 | S   | 0.448949  |
| 102 | C7 | PX  | 0.320615  |
| 103 | C7 | PY  | 0.186017  |
| 104 | C7 | PZ  | 0.480038  |
| 105 | C7 | DXX | 0.022761  |
| 106 | C7 | DYY | 0.014997  |
| 107 | C7 | DZZ | -0.017778 |
| 108 | C7 | DXY | 0.016465  |
| 109 | C7 | DXZ | 0.003892  |
| 110 | C7 | DYZ | 0.007348  |
| 111 | 01 | S   | 1.995297  |
| 112 | 01 | S   | 0.885512  |
| 113 | 01 | PX  | 0.942983  |
| 114 | 01 | PY  | 0.859023  |
| 115 | 01 | PZ  | 1.115339  |
| 116 | 01 | S   | 0.948862  |
| 117 | 01 | PX  | 0.597882  |
| 118 | 01 | PY  | 0.511108  |
| 119 | 01 | PZ  | 0.738701  |
| 120 | 01 | DXX | 0.016537  |
| 121 | 01 | DYY | 0.025687  |
| 122 | 01 | DZZ | -0.000113 |
| 123 | 01 | DXY | 0.006043  |
| 124 | 01 | DXZ | 0.002863  |
| 125 | 01 | DYZ | 0.004840  |
| 126 | H4 | S   | 0.531560  |
| 127 | H4 | S   | 0.276527  |
| 128 | H4 | PX  | 0.005579  |
| 129 | H4 | PY  | 0.006053  |
| 130 | H4 | PZ  | 0.002260  |
| 131 | N1 | S   | 1.996242  |
| 132 | N1 | S   | 0.787125  |
| 133 | N1 | PX  | 0.865540  |
| 134 | N1 | PY  | 0.833170  |
| 135 | N1 | PZ  | 0.661960  |
| 136 | N1 | S   | 0.962512  |
| 137 | N1 | PX  | 0.516183  |
| 138 | N1 | PY  | 0.371284  |
| 139 | N1 | PZ  | 0.545098  |
| 140 | N1 | DXX | 0.008194  |
| 141 | N1 | DYY | 0.014474  |
| 142 | N1 | DZZ | -0.011320 |
| 143 | N1 | DXY | 0.008872  |
| 144 | N1 | DXZ | 0.004584  |
| 145 | N1 | DYZ | 0.011447  |

|     |     |     |           |
|-----|-----|-----|-----------|
| 146 | H6  | S   | 0.530699  |
| 147 | H6  | S   | 0.276199  |
| 148 | H6  | PX  | 0.009342  |
| 149 | H6  | PY  | 0.002422  |
| 150 | H6  | PZ  | 0.002302  |
| 151 | C8  | S   | 1.996661  |
| 152 | C8  | S   | 0.680929  |
| 153 | C8  | PX  | 0.660898  |
| 154 | C8  | PY  | 0.774976  |
| 155 | C8  | PZ  | 0.535776  |
| 156 | C8  | S   | 0.377242  |
| 157 | C8  | PX  | 0.097228  |
| 158 | C8  | PY  | 0.120073  |
| 159 | C8  | PZ  | 0.427158  |
| 160 | C8  | DXX | 0.020848  |
| 161 | C8  | DYY | 0.029138  |
| 162 | C8  | DZZ | -0.019142 |
| 163 | C8  | DXY | 0.025485  |
| 164 | C8  | DXZ | 0.010042  |
| 165 | C8  | DYZ | 0.010054  |
| 166 | H8  | S   | 0.531217  |
| 167 | H8  | S   | 0.294522  |
| 168 | H8  | PX  | 0.010160  |
| 169 | H8  | PY  | 0.001670  |
| 170 | H8  | PZ  | 0.002661  |
| 171 | C10 | S   | 1.996636  |
| 172 | C10 | S   | 0.678138  |
| 173 | C10 | PX  | 0.725035  |
| 174 | C10 | PY  | 0.768638  |
| 175 | C10 | PZ  | 0.470293  |
| 176 | C10 | S   | 0.565066  |
| 177 | C10 | PX  | 0.360903  |
| 178 | C10 | PY  | 0.244104  |
| 179 | C10 | PZ  | 0.451542  |
| 180 | C10 | DXX | 0.012351  |
| 181 | C10 | DYY | 0.018690  |
| 182 | C10 | DZZ | -0.020290 |
| 183 | C10 | DXY | 0.013151  |
| 184 | C10 | DXZ | 0.000362  |
| 185 | C10 | DYZ | 0.007672  |
| 186 | H16 | S   | 0.533306  |
| 187 | H16 | S   | 0.308514  |
| 188 | H16 | PX  | 0.009115  |
| 189 | H16 | PY  | 0.002490  |
| 190 | H16 | PZ  | 0.002273  |
| 191 | H18 | S   | 0.529207  |
| 192 | H18 | S   | 0.291436  |
| 193 | H18 | PX  | 0.006576  |
| 194 | H18 | PY  | 0.005231  |
| 195 | H18 | PZ  | 0.002164  |
| 196 | C9  | S   | 1.996709  |
| 197 | C9  | S   | 0.648252  |
| 198 | C9  | PX  | 0.572181  |
| 199 | C9  | PY  | 0.686169  |

|     |    |     |          |
|-----|----|-----|----------|
| 200 | C9 | PZ  | 0.722477 |
| 201 | C9 | S   | 0.547280 |
| 202 | C9 | PX  | 0.151609 |
| 203 | C9 | PY  | 0.318498 |
| 204 | C9 | PZ  | 0.322838 |
| 205 | C9 | DXX | 0.012056 |
| 206 | C9 | DYY | 0.010736 |
| 207 | C9 | DZZ | 0.004387 |
| 208 | C9 | DXY | 0.014913 |
| 209 | C9 | DXZ | 0.020755 |
| 210 | C9 | DYZ | 0.003392 |
| 211 | H3 | S   | 0.540886 |
| 212 | H3 | S   | 0.304305 |
| 213 | H3 | PX  | 0.001138 |
| 214 | H3 | PY  | 0.009288 |
| 215 | H3 | PZ  | 0.002049 |
| 216 | H5 | S   | 0.540933 |
| 217 | H5 | S   | 0.327826 |
| 218 | H5 | PX  | 0.003466 |
| 219 | H5 | PY  | 0.002066 |
| 220 | H5 | PZ  | 0.007116 |
| 221 | H7 | S   | 0.540933 |
| 222 | H7 | S   | 0.327826 |
| 223 | H7 | PX  | 0.003466 |
| 224 | H7 | PY  | 0.002066 |
| 225 | H7 | PZ  | 0.007116 |

| Atom  | Occupancy | Charge |
|-------|-----------|--------|
| ----- | -----     | -----  |

|     |          |           |
|-----|----------|-----------|
| H1  | 0.845457 | 0.154543  |
| C1  | 6.203094 | -0.203094 |
| C2  | 6.103680 | -0.103680 |
| C3  | 6.070746 | -0.070746 |
| C4  | 5.587132 | 0.412868  |
| C5  | 6.175780 | -0.175780 |
| C6  | 5.773520 | 0.226480  |
| C7  | 6.148785 | -0.148785 |
| O1  | 8.650564 | -0.650564 |
| H4  | 0.821980 | 0.178020  |
| N1  | 7.575365 | -0.575365 |
| H6  | 0.820965 | 0.179035  |
| C8  | 5.747366 | 0.252634  |
| H8  | 0.840231 | 0.159769  |
| C10 | 6.292292 | -0.292292 |
| H16 | 0.855698 | 0.144302  |
| H18 | 0.834613 | 0.165387  |
| C9  | 6.032253 | -0.032253 |
| H3  | 0.857666 | 0.142334  |
| H5  | 0.881406 | 0.118594  |
| H7  | 0.881406 | 0.118594  |

Total Charge = 0.000000

# Natural Atomic Orbital Populations

| Nao | Atom  | Type    | Basis | Occupancy |
|-----|-------|---------|-------|-----------|
| --- | ----- | -----   | ----- | -----     |
| 1   | H1    | S       | MIN   | 0.760102  |
| 2   | H1    | S       | RYD   | 0.000860  |
| 3   | H1    | PX      | RYD   | 0.000507  |
| 4   | H1    | PY      | RYD   | 0.000070  |
| 5   | H1    | PZ      | RYD   | 0.000117  |
| 6   | C1    | S       | MIN   | 1.998920  |
| 7   | C1    | S       | MIN   | 0.938227  |
| 8   | C1    | S       | RYD   | 0.000856  |
| 9   | C1    | S       | RYD   | 0.000027  |
| 10  | C1    | PX      | MIN   | 1.201661  |
| 11  | C1    | PX      | RYD   | 0.004427  |
| 12  | C1    | PY      | MIN   | 1.065741  |
| 13  | C1    | PY      | RYD   | 0.005363  |
| 14  | C1    | PZ      | MIN   | 1.134184  |
| 15  | C1    | PZ      | RYD   | 0.002329  |
| 16  | C1    | DXY     | RYD   | 0.001729  |
| 17  | C1    | DXZ     | RYD   | 0.001214  |
| 18  | C1    | DYZ     | RYD   | 0.000560  |
| 19  | C1    | DXX-YY  | RYD   | 0.001401  |
| 20  | C1    | D3ZZ-RR | RYD   | 0.001197  |
| 21  | C2    | S       | MIN   | 1.998987  |
| 22  | C2    | S       | MIN   | 0.959355  |
| 23  | C2    | S       | RYD   | 0.001088  |
| 24  | C2    | S       | RYD   | 0.000036  |
| 25  | C2    | PX      | MIN   | 1.186574  |
| 26  | C2    | PX      | RYD   | 0.005910  |
| 27  | C2    | PY      | MIN   | 1.075491  |
| 28  | C2    | PY      | RYD   | 0.006953  |
| 29  | C2    | PZ      | MIN   | 0.976752  |
| 30  | C2    | PZ      | RYD   | 0.001688  |
| 31  | C2    | DXY     | RYD   | 0.001824  |
| 32  | C2    | DXZ     | RYD   | 0.000417  |
| 33  | C2    | DYZ     | RYD   | 0.001288  |
| 34  | C2    | DXX-YY  | RYD   | 0.001505  |
| 35  | C2    | D3ZZ-RR | RYD   | 0.001225  |
| 36  | C3    | S       | MIN   | 1.998989  |
| 37  | C3    | S       | MIN   | 0.878637  |
| 38  | C3    | S       | RYD   | 0.001423  |
| 39  | C3    | S       | RYD   | 0.000050  |
| 40  | C3    | PX      | MIN   | 1.075588  |
| 41  | C3    | PX      | RYD   | 0.008844  |
| 42  | C3    | PY      | MIN   | 1.106043  |
| 43  | C3    | PY      | RYD   | 0.004179  |
| 44  | C3    | PZ      | MIN   | 1.013808  |
| 45  | C3    | PZ      | RYD   | 0.001066  |
| 46  | C3    | DXY     | RYD   | 0.001368  |
| 47  | C3    | DXZ     | RYD   | 0.000397  |
| 48  | C3    | DYZ     | RYD   | 0.001620  |

|     |    |         |     |          |
|-----|----|---------|-----|----------|
| 49  | C3 | DXX-YY  | RVD | 0.001625 |
| 50  | C3 | D3ZZ-RR | RVD | 0.001064 |
| 51  | C4 | S       | MIN | 1.998783 |
| 52  | C4 | S       | MIN | 0.822480 |
| 53  | C4 | S       | RVD | 0.001487 |
| 54  | C4 | S       | RVD | 0.000114 |
| 55  | C4 | PX      | MIN | 1.071846 |
| 56  | C4 | PX      | RVD | 0.005692 |
| 57  | C4 | PY      | MIN | 0.753903 |
| 58  | C4 | PY      | RVD | 0.009798 |
| 59  | C4 | PZ      | MIN | 0.926714 |
| 60  | C4 | PZ      | RVD | 0.001710 |
| 61  | C4 | DXY     | RVD | 0.002106 |
| 62  | C4 | DXZ     | RVD | 0.001076 |
| 63  | C4 | DYZ     | RVD | 0.002641 |
| 64  | C4 | DXX-YY  | RVD | 0.002773 |
| 65  | C4 | D3ZZ-RR | RVD | 0.001038 |
| 66  | C5 | S       | MIN | 1.999024 |
| 67  | C5 | S       | MIN | 0.966354 |
| 68  | C5 | S       | RVD | 0.000852 |
| 69  | C5 | S       | RVD | 0.000031 |
| 70  | C5 | PX      | MIN | 1.102095 |
| 71  | C5 | PX      | RVD | 0.005945 |
| 72  | C5 | PY      | MIN | 1.154844 |
| 73  | C5 | PY      | RVD | 0.006763 |
| 74  | C5 | PZ      | MIN | 0.983121 |
| 75  | C5 | PZ      | RVD | 0.001731 |
| 76  | C5 | DXY     | RVD | 0.001684 |
| 77  | C5 | DXZ     | RVD | 0.000281 |
| 78  | C5 | DYZ     | RVD | 0.001397 |
| 79  | C5 | DXX-YY  | RVD | 0.001711 |
| 80  | C5 | D3ZZ-RR | RVD | 0.001302 |
| 81  | C6 | S       | MIN | 1.999151 |
| 82  | C6 | S       | MIN | 0.837925 |
| 83  | C6 | S       | RVD | 0.003711 |
| 84  | C6 | S       | RVD | 0.000112 |
| 85  | C6 | PX      | MIN | 1.033983 |
| 86  | C6 | PX      | RVD | 0.008355 |
| 87  | C6 | PY      | MIN | 0.948168 |
| 88  | C6 | PY      | RVD | 0.009704 |
| 89  | C6 | PZ      | MIN | 0.875846 |
| 90  | C6 | PZ      | RVD | 0.001174 |
| 91  | C6 | DXY     | RVD | 0.002901 |
| 92  | C6 | DXZ     | RVD | 0.000530 |
| 93  | C6 | DYZ     | RVD | 0.002381 |
| 94  | C6 | DXX-YY  | RVD | 0.001822 |
| 95  | C6 | D3ZZ-RR | RVD | 0.001023 |
| 96  | C7 | S       | MIN | 1.998873 |
| 97  | C7 | S       | MIN | 0.953736 |
| 98  | C7 | S       | RVD | 0.000711 |
| 99  | C7 | S       | RVD | 0.000041 |
| 100 | C7 | PX      | MIN | 1.200778 |
| 101 | C7 | PX      | RVD | 0.004175 |
| 102 | C7 | PY      | MIN | 1.040786 |

|     |    |         |     |          |
|-----|----|---------|-----|----------|
| 103 | C7 | PY      | RVD | 0.005468 |
| 104 | C7 | PZ      | MIN | 1.008539 |
| 105 | C7 | PZ      | RVD | 0.001671 |
| 106 | C7 | DXY     | RVD | 0.001779 |
| 107 | C7 | DXZ     | RVD | 0.000860 |
| 108 | C7 | DYZ     | RVD | 0.000911 |
| 109 | C7 | DXX-YY  | RVD | 0.001433 |
| 110 | C7 | D3ZZ-RR | RVD | 0.001216 |
| 111 | O1 | S       | MIN | 1.999715 |
| 112 | O1 | S       | MIN | 1.570738 |
| 113 | O1 | S       | RVD | 0.000895 |
| 114 | O1 | S       | RVD | 0.000026 |
| 115 | O1 | PX      | MIN | 1.642862 |
| 116 | O1 | PX      | RVD | 0.002596 |
| 117 | O1 | PY      | MIN | 1.499321 |
| 118 | O1 | PY      | RVD | 0.001512 |
| 119 | O1 | PZ      | MIN | 1.874311 |
| 120 | O1 | PZ      | RVD | 0.003659 |
| 121 | O1 | DXY     | RVD | 0.001613 |
| 122 | O1 | DXZ     | RVD | 0.001127 |
| 123 | O1 | DYZ     | RVD | 0.001173 |
| 124 | O1 | DXX-YY  | RVD | 0.003951 |
| 125 | O1 | D3ZZ-RR | RVD | 0.002029 |
| 126 | H4 | S       | MIN | 0.749192 |
| 127 | H4 | S       | RVD | 0.000751 |
| 128 | H4 | PX      | RVD | 0.000309 |
| 129 | H4 | PY      | RVD | 0.000321 |
| 130 | H4 | PZ      | RVD | 0.000066 |
| 131 | N1 | S       | MIN | 1.999380 |
| 132 | N1 | S       | MIN | 1.379731 |
| 133 | N1 | S       | RVD | 0.000496 |
| 134 | N1 | S       | RVD | 0.000017 |
| 135 | N1 | PX      | MIN | 1.511466 |
| 136 | N1 | PX      | RVD | 0.004266 |
| 137 | N1 | PY      | MIN | 1.371089 |
| 138 | N1 | PY      | RVD | 0.003967 |
| 139 | N1 | PZ      | MIN | 1.227123 |
| 140 | N1 | PZ      | RVD | 0.001209 |
| 141 | N1 | DXY     | RVD | 0.002218 |
| 142 | N1 | DXZ     | RVD | 0.001760 |
| 143 | N1 | DYZ     | RVD | 0.002970 |
| 144 | N1 | DXX-YY  | RVD | 0.004686 |
| 145 | N1 | D3ZZ-RR | RVD | 0.002870 |
| 146 | H6 | S       | MIN | 0.748692 |
| 147 | H6 | S       | RVD | 0.000747 |
| 148 | H6 | PX      | RVD | 0.000524 |
| 149 | H6 | PY      | RVD | 0.000079 |
| 150 | H6 | PZ      | RVD | 0.000072 |
| 151 | C8 | S       | MIN | 1.999037 |
| 152 | C8 | S       | MIN | 0.866006 |
| 153 | C8 | S       | RVD | 0.002899 |
| 154 | C8 | S       | RVD | 0.000106 |
| 155 | C8 | PX      | MIN | 0.907783 |
| 156 | C8 | PX      | RVD | 0.009129 |

|     |     |         |     |          |
|-----|-----|---------|-----|----------|
| 157 | C8  | PY      | MIN | 1.089210 |
| 158 | C8  | PY      | RYD | 0.008116 |
| 159 | C8  | PZ      | MIN | 1.005298 |
| 160 | C8  | PZ      | RYD | 0.001574 |
| 161 | C8  | DXY     | RYD | 0.002297 |
| 162 | C8  | DXZ     | RYD | 0.001228 |
| 163 | C8  | DYZ     | RYD | 0.001517 |
| 164 | C8  | DXX-YY  | RYD | 0.002114 |
| 165 | C8  | D3ZZ-RR | RYD | 0.001111 |
| 166 | H8  | S       | MIN | 0.762543 |
| 167 | H8  | S       | RYD | 0.000423 |
| 168 | H8  | PX      | RYD | 0.000592 |
| 169 | H8  | PY      | RYD | 0.000018 |
| 170 | H8  | PZ      | RYD | 0.000096 |
| 171 | C10 | S       | MIN | 1.998991 |
| 172 | C10 | S       | MIN | 1.045350 |
| 173 | C10 | S       | RYD | 0.001147 |
| 174 | C10 | S       | RYD | 0.000015 |
| 175 | C10 | PX      | MIN | 1.213224 |
| 176 | C10 | PX      | RYD | 0.004486 |
| 177 | C10 | PY      | MIN | 1.134888 |
| 178 | C10 | PY      | RYD | 0.003455 |
| 179 | C10 | PZ      | MIN | 0.904125 |
| 180 | C10 | PZ      | RYD | 0.002294 |
| 181 | C10 | DXY     | RYD | 0.001829 |
| 182 | C10 | DXZ     | RYD | 0.000071 |
| 183 | C10 | DYZ     | RYD | 0.001483 |
| 184 | C10 | DXX-YY  | RYD | 0.002032 |
| 185 | C10 | D3ZZ-RR | RYD | 0.001512 |
| 186 | H16 | S       | MIN | 0.782926 |
| 187 | H16 | S       | RYD | 0.000407 |
| 188 | H16 | PX      | RYD | 0.000547 |
| 189 | H16 | PY      | RYD | 0.000073 |
| 190 | H16 | PZ      | RYD | 0.000088 |
| 191 | H18 | S       | MIN | 0.766048 |
| 192 | H18 | S       | RYD | 0.000814 |
| 193 | H18 | PX      | RYD | 0.000383 |
| 194 | H18 | PY      | RYD | 0.000240 |
| 195 | H18 | PZ      | RYD | 0.000075 |
| 196 | C9  | S       | MIN | 1.999446 |
| 197 | C9  | S       | MIN | 1.081286 |
| 198 | C9  | S       | RYD | 0.001539 |
| 199 | C9  | S       | RYD | 0.000031 |
| 200 | C9  | PX      | MIN | 0.814459 |
| 201 | C9  | PX      | RYD | 0.003582 |
| 202 | C9  | PY      | MIN | 1.119362 |
| 203 | C9  | PY      | RYD | 0.003414 |
| 204 | C9  | PZ      | MIN | 1.206820 |
| 205 | C9  | PZ      | RYD | 0.000454 |
| 206 | C9  | DXY     | RYD | 0.002107 |
| 207 | C9  | DXZ     | RYD | 0.002936 |
| 208 | C9  | DYZ     | RYD | 0.000667 |
| 209 | C9  | DXX-YY  | RYD | 0.002293 |
| 210 | C9  | D3ZZ-RR | RYD | 0.002076 |

|     |    |    |     |          |
|-----|----|----|-----|----------|
| 211 | H3 | S  | MIN | 0.783083 |
| 212 | H3 | S  | RYD | 0.000419 |
| 213 | H3 | PX | RYD | 0.000025 |
| 214 | H3 | PY | RYD | 0.000607 |
| 215 | H3 | PZ | RYD | 0.000030 |
| 216 | H5 | S  | MIN | 0.806803 |
| 217 | H5 | S  | RYD | 0.001421 |
| 218 | H5 | PX | RYD | 0.000176 |
| 219 | H5 | PY | RYD | 0.000059 |
| 220 | H5 | PZ | RYD | 0.000484 |
| 221 | H7 | S  | MIN | 0.806803 |
| 222 | H7 | S  | RYD | 0.001421 |
| 223 | H7 | PX | RYD | 0.000176 |
| 224 | H7 | PY | RYD | 0.000059 |
| 225 | H7 | PZ | RYD | 0.000484 |

Total MIN occupancy: 83.713120  
 Total RYD occupancy: 0.286880  
 Total occupancy: 84.000000

#### Natural Atomic Populations and Charges

| Atom  | Occupancy | Charge    |
|-------|-----------|-----------|
| ----- | -----     | -----     |
| H1    | 0.761656  | 0.238344  |
| C1    | 6.357838  | -0.357838 |
| C2    | 6.219092  | -0.219092 |
| C3    | 6.094699  | -0.094699 |
| C4    | 5.602160  | 0.397840  |
| C5    | 6.227136  | -0.227136 |
| C6    | 5.726786  | 0.273214  |
| C7    | 6.220977  | -0.220977 |
| O1    | 8.605530  | -0.605530 |
| H4    | 0.750640  | 0.249360  |
| N1    | 7.513248  | -0.513248 |
| H6    | 0.750114  | 0.249886  |
| C8    | 5.897425  | 0.102575  |
| H8    | 0.763672  | 0.236328  |
| C10   | 6.314904  | -0.314904 |
| H16   | 0.784041  | 0.215959  |
| H18   | 0.767560  | 0.232440  |
| C9    | 6.240471  | -0.240471 |
| H3    | 0.784165  | 0.215835  |
| H5    | 0.808943  | 0.191057  |
| H7    | 0.808943  | 0.191057  |

Total Charge = 0.000000

Q-minus(NAO) = -0.6055  
 Q-plus(NAO) = 0.2499



Reason for exit: Normal completion

Wall Time: 000:00:00

CPU Time: 000:00:00
